# Supplementary material
Source: PubMed Central journal article supplement (PMC4824851)

Prot: 1433B\_HUMAN

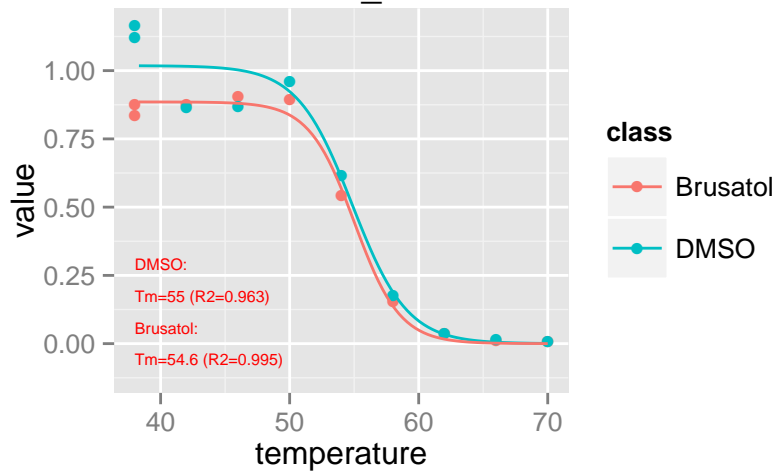

Prot: 1433E\_HUMAN

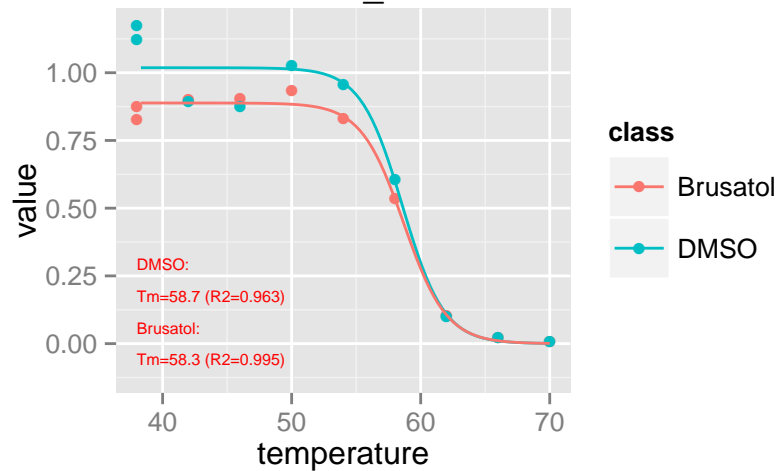

Prot: 1433F\_HUMAN

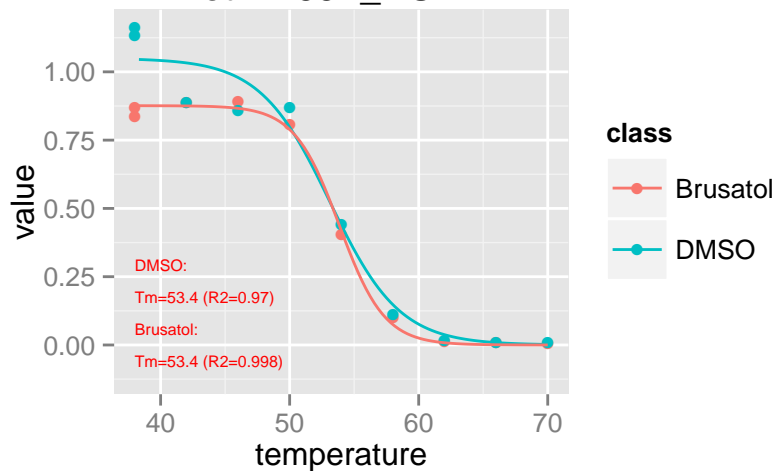

Prot: 1433G\_HUMAN

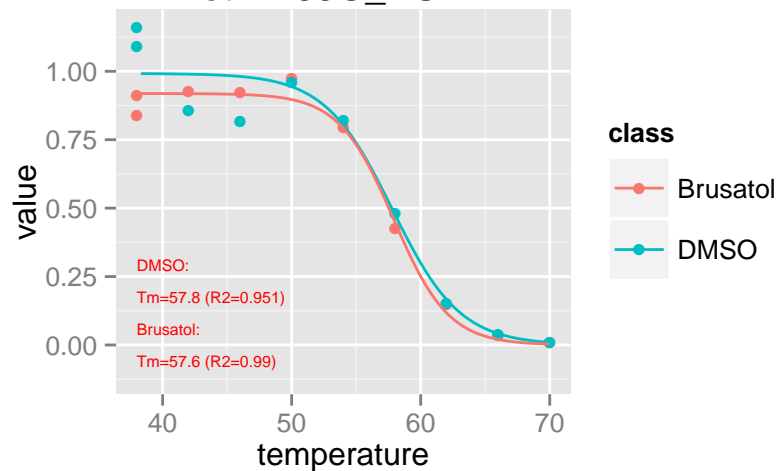

Prot: 1433S\_HUMAN

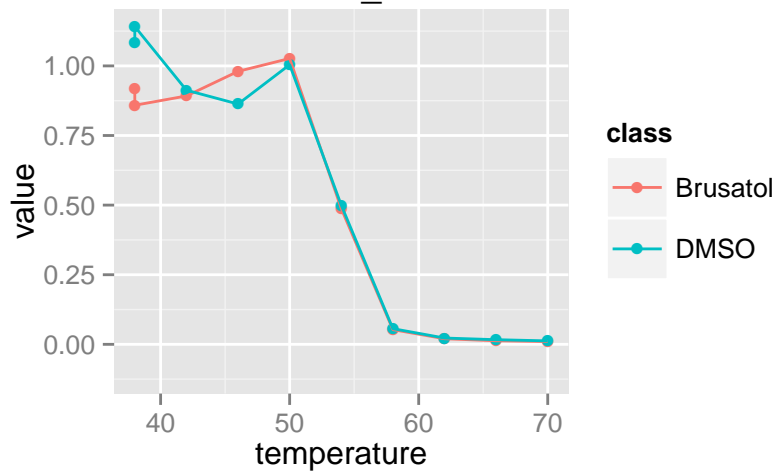

Prot: 1433T\_HUMAN

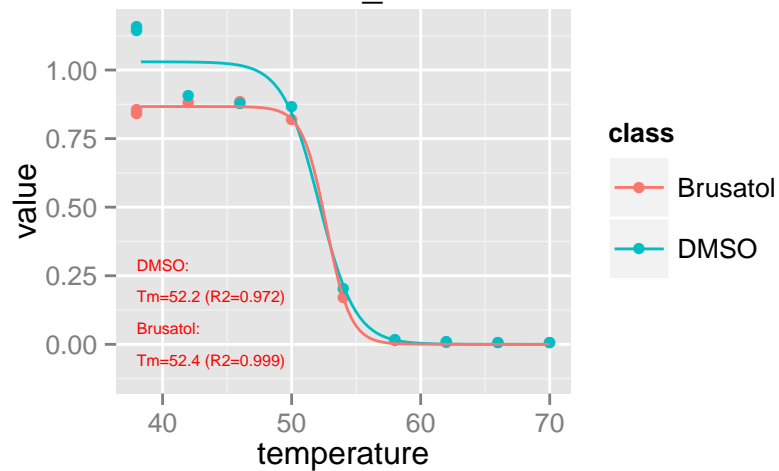

Prot: 1433Z\_HUMAN

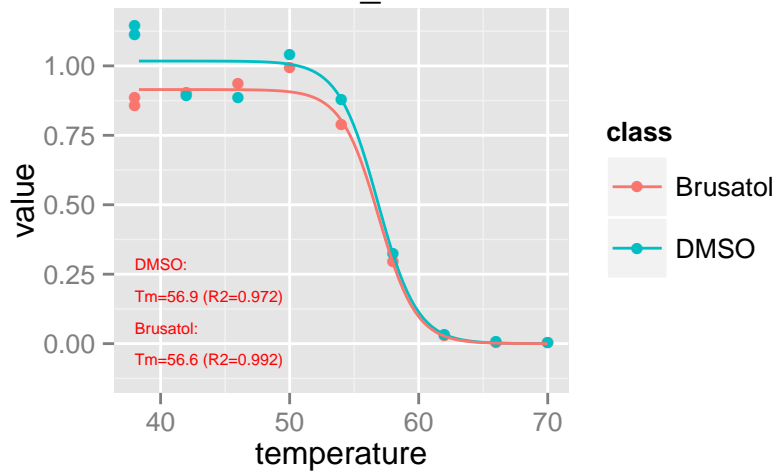

Prot: 2A5A\_HUMAN

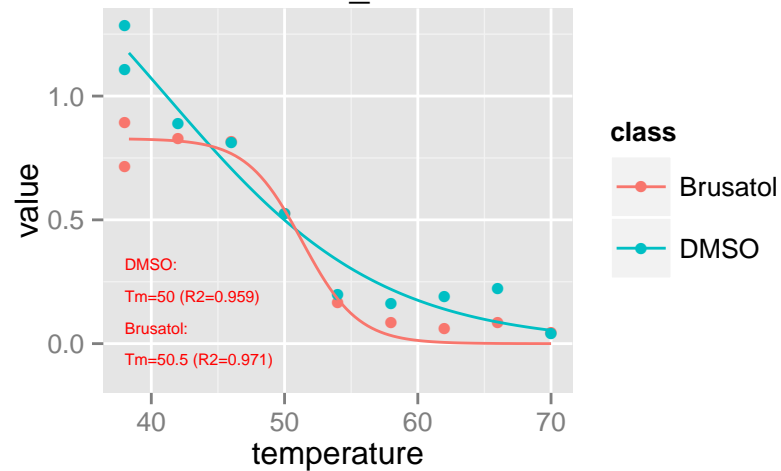

Prot: 2A5D\_HUMAN

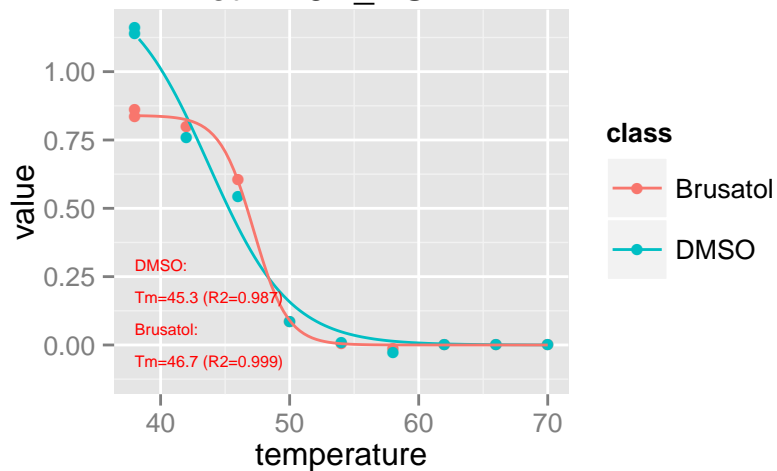

Prot: 2A5E\_HUMAN

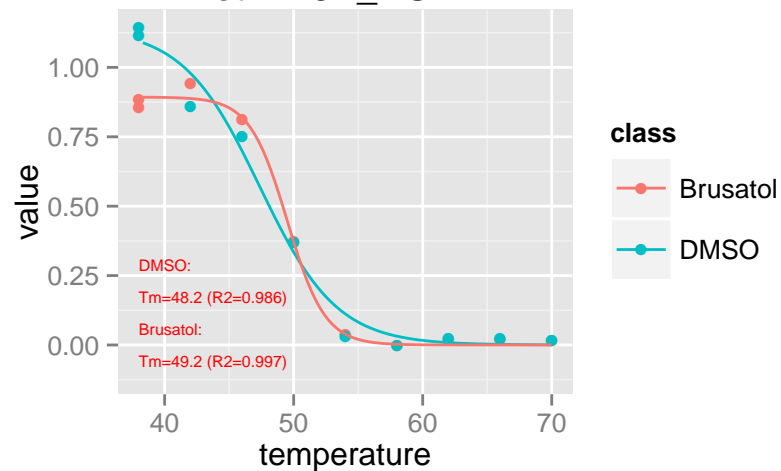

Prot: 2A5G\_HUMAN

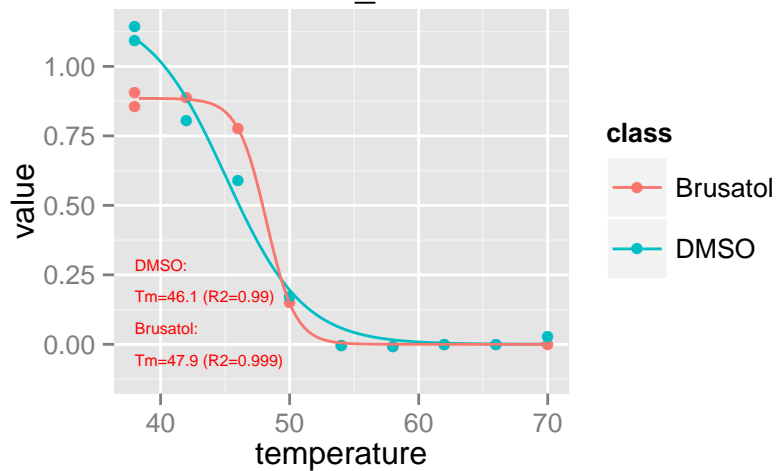

Prot: 2AAA\_HUMAN

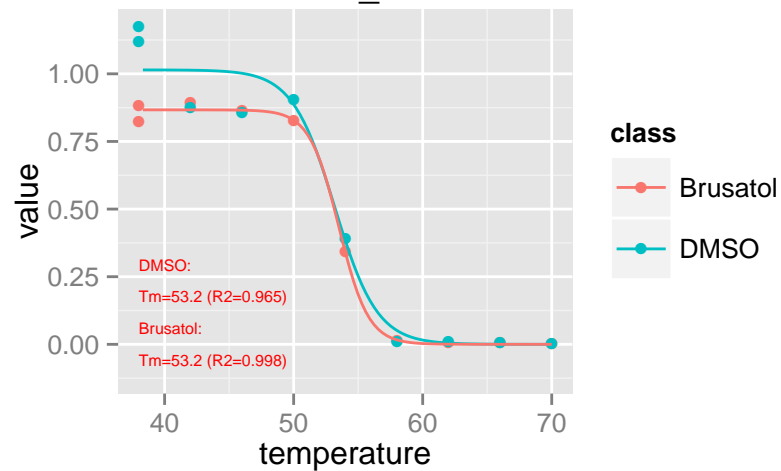

Prot: 2AAB\_HUMAN

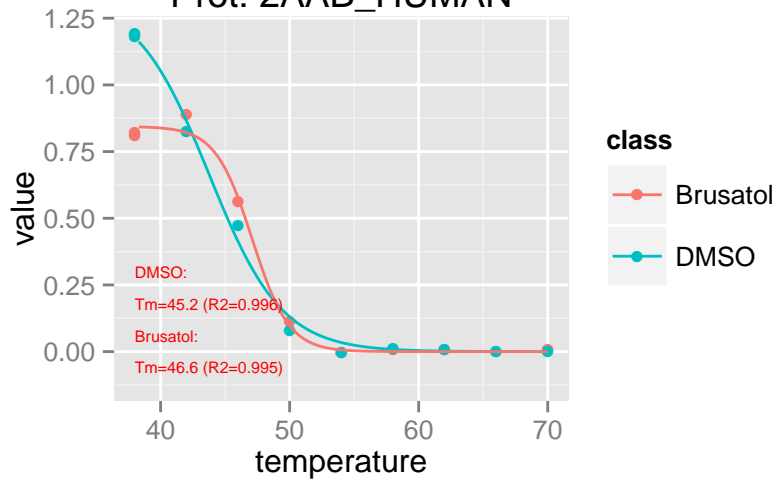

Prot: 2ABA\_HUMAN

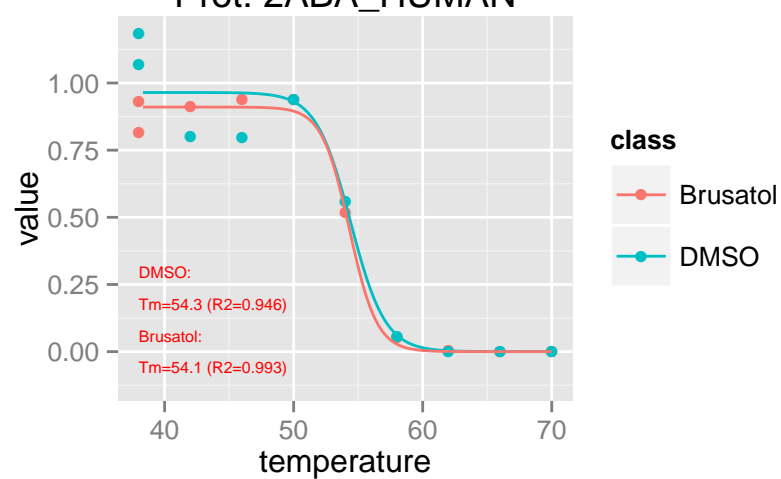

Prot: 3HIDH\_HUMAN

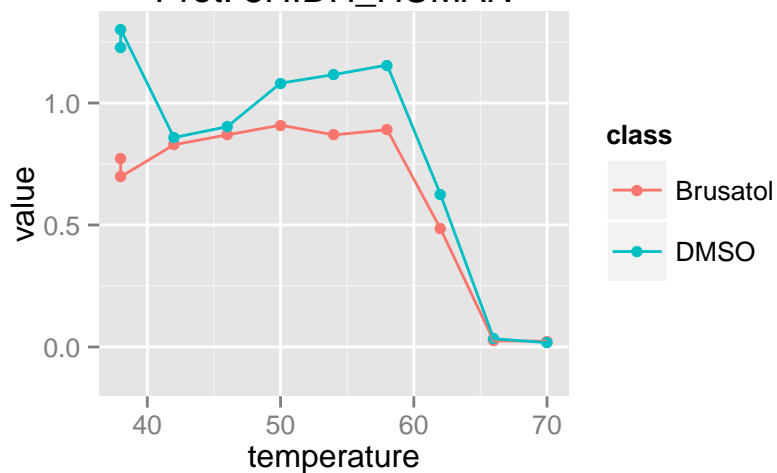

Prot: 3MG\_HUMAN

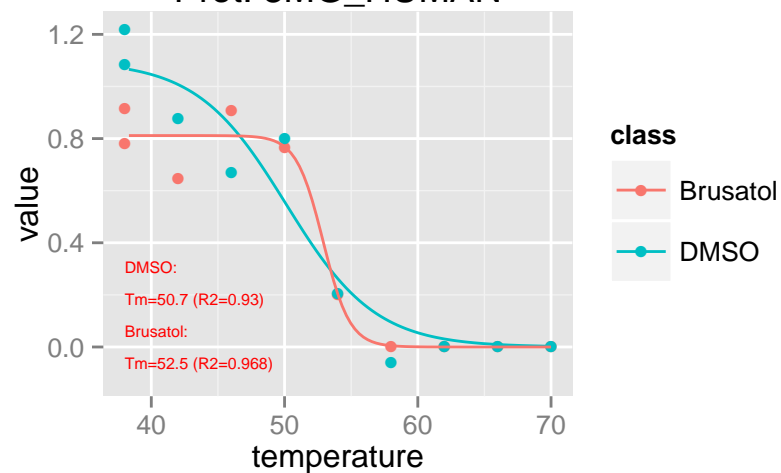

Prot: 41\_HUMAN

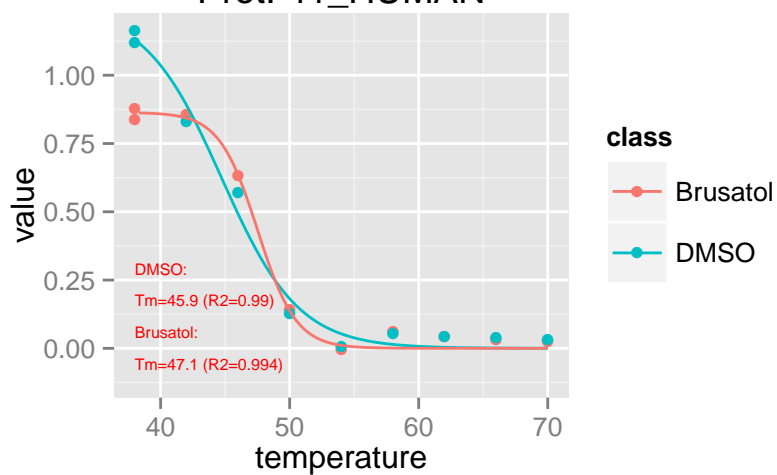

Prot: 4EBP1\_HUMAN

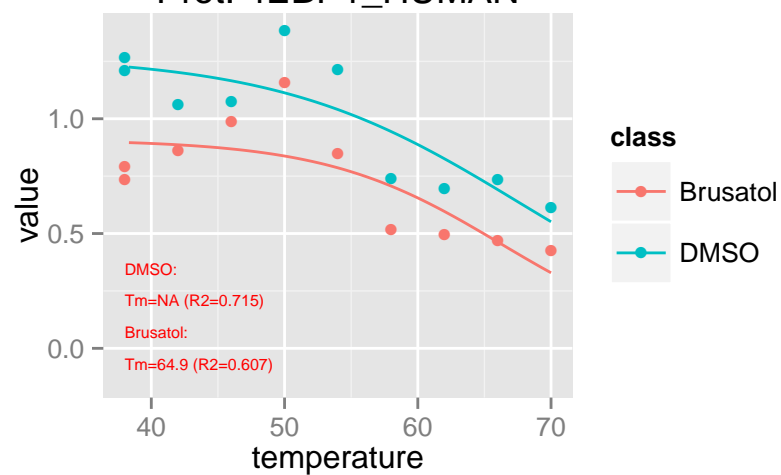

Prot: 4F2\_HUMAN

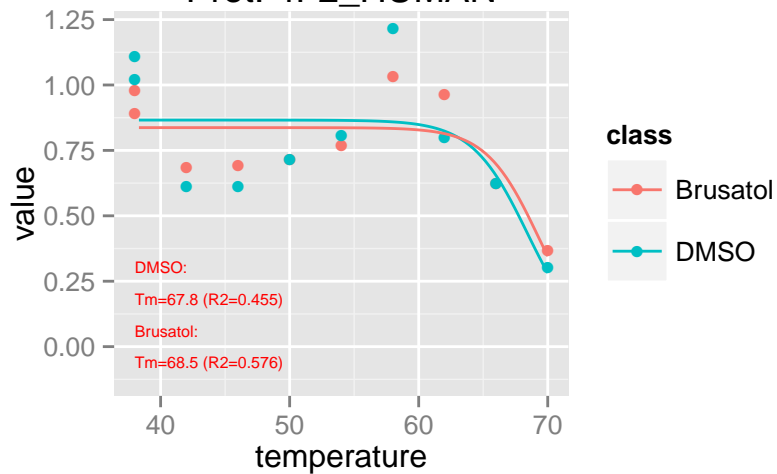

Prot: 5NT3L\_HUMAN

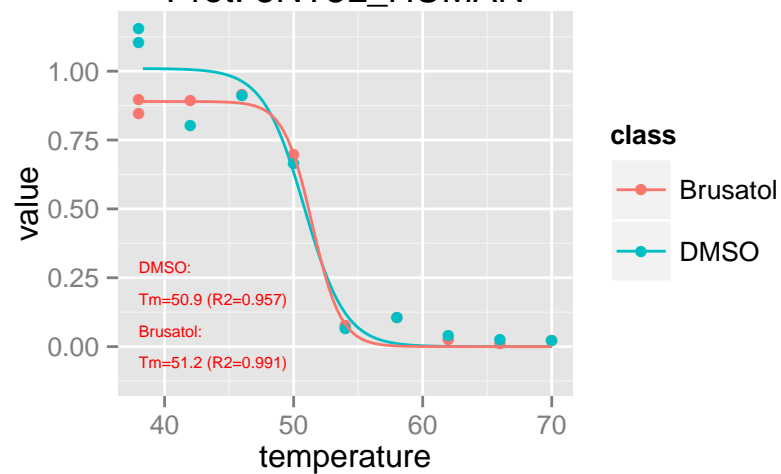

Prot: 5NTC\_HUMAN

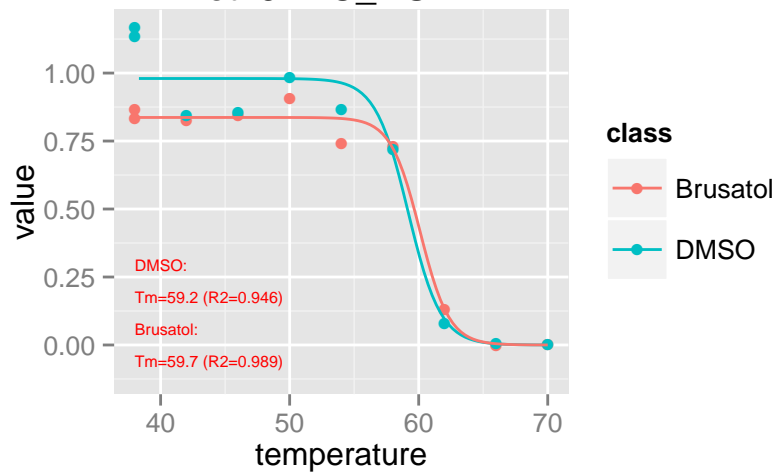

Prot: 6PGD\_HUMAN

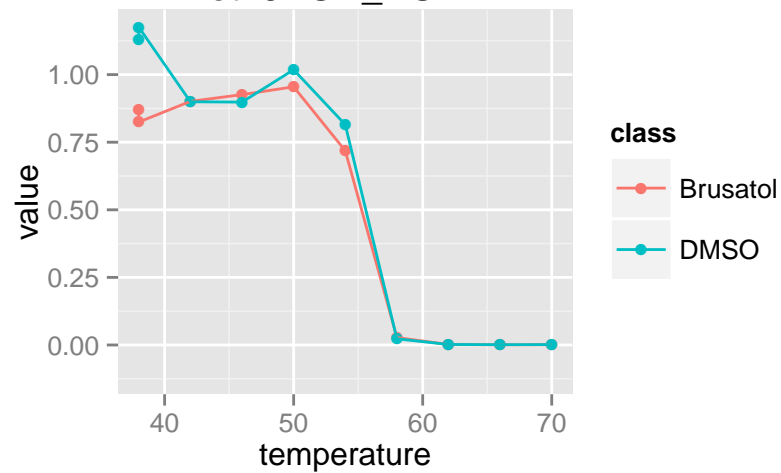

Prot: 6PGL\_HUMAN

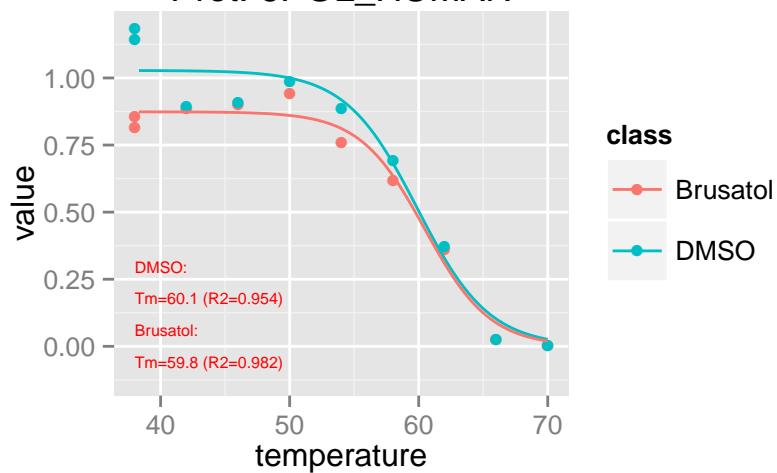

Prot: 8ODP\_HUMAN

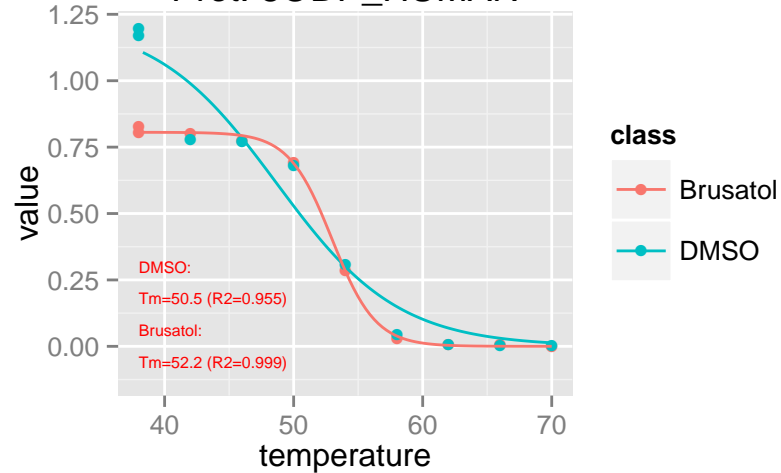

Prot: A16A1\_HUMAN

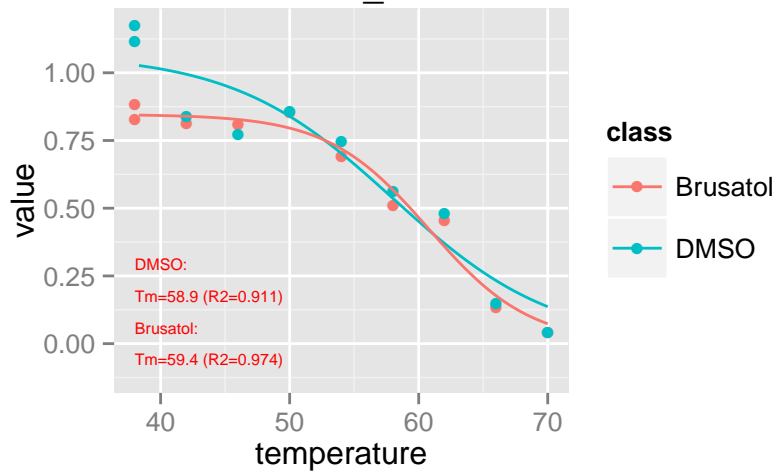

Prot: A16L1\_HUMAN

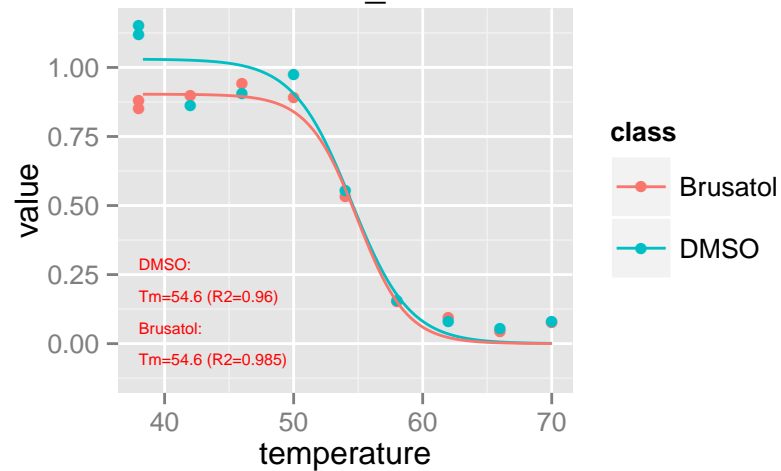

Prot: A1E282\_HUMAN

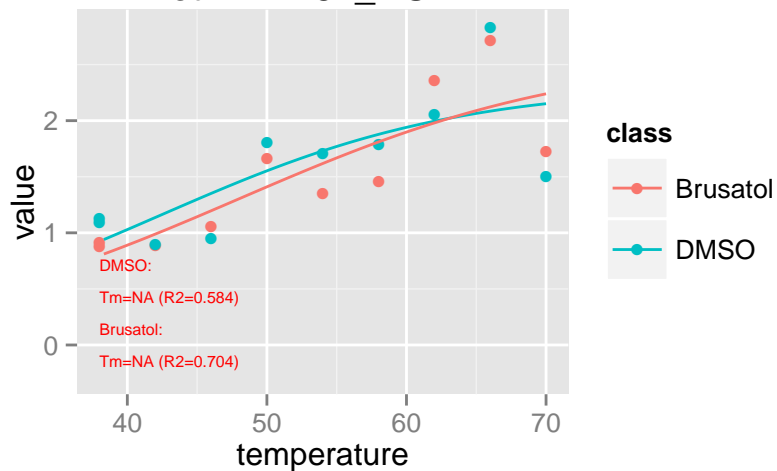

Prot: A4UCS8\_HUMAN

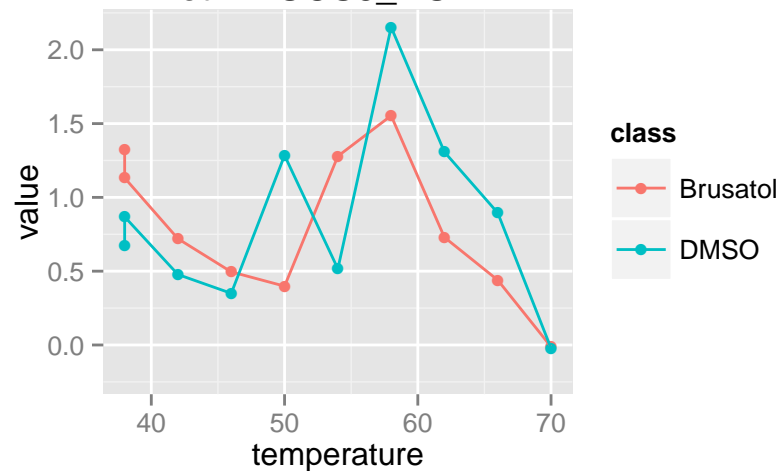

Prot: A4UCU2\_HUMAN

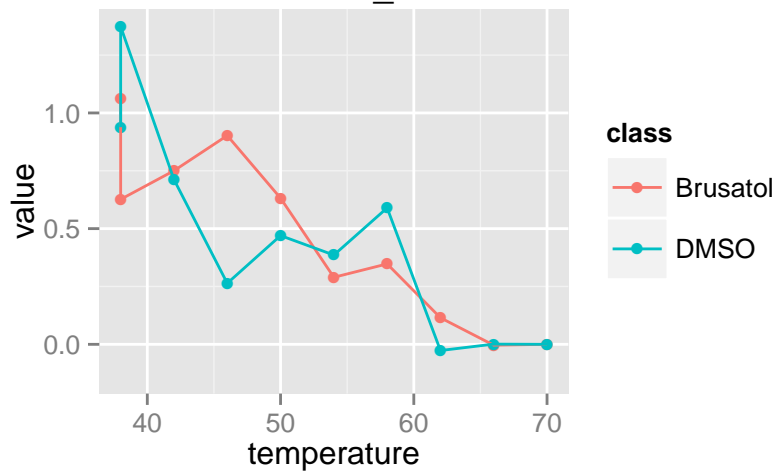

Prot: A6NED0\_HUMAN

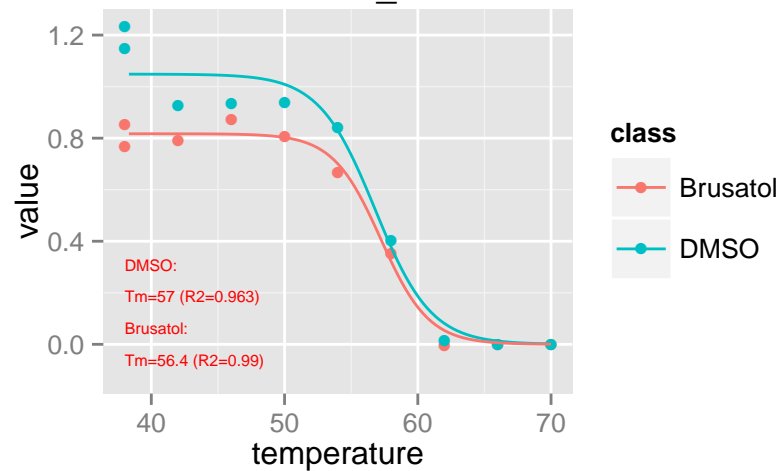

Prot: A7BI36\_HUMAN

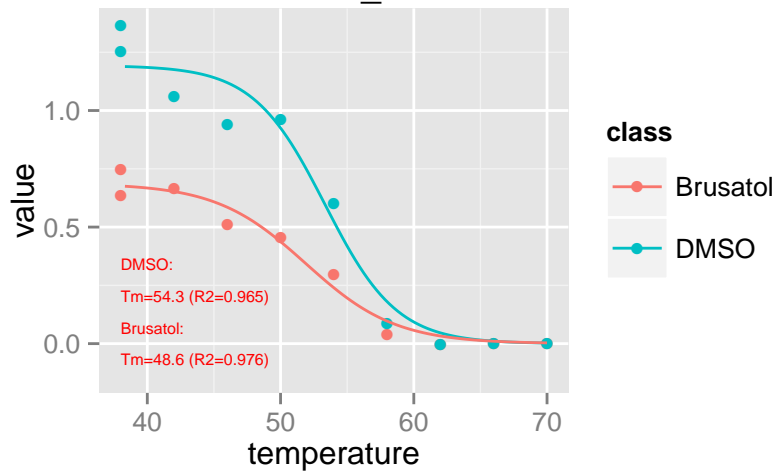

Prot: A7L3B\_HUMAN

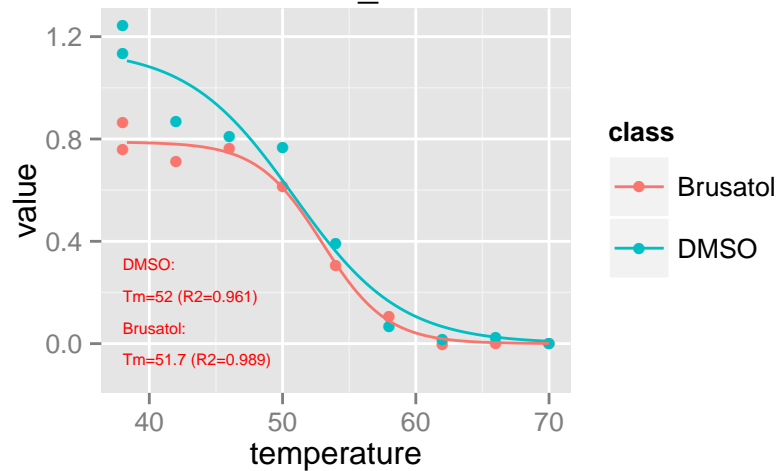

Prot: A7XZE4\_HUMAN

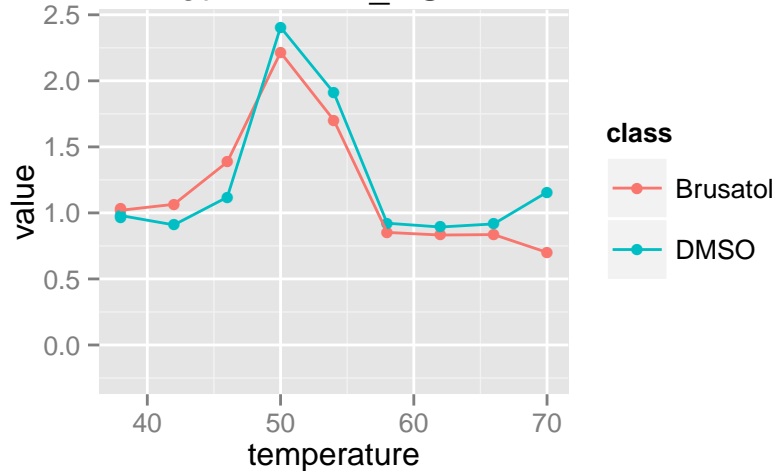

Prot: A8K8C4\_HUMAN

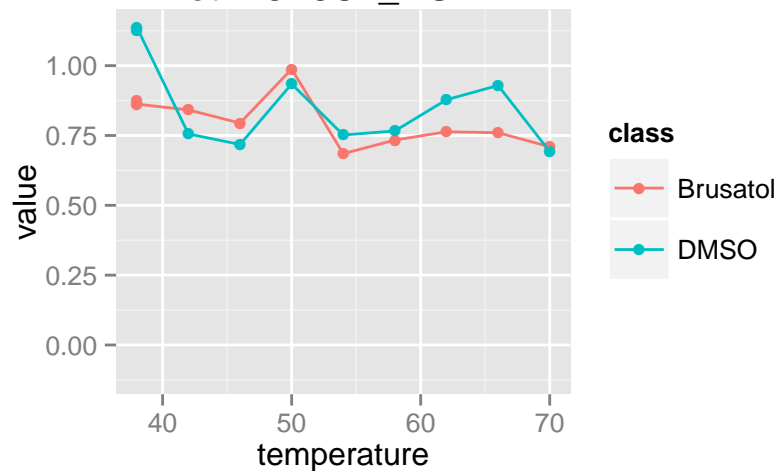

Prot: A8K8F0\_HUMAN

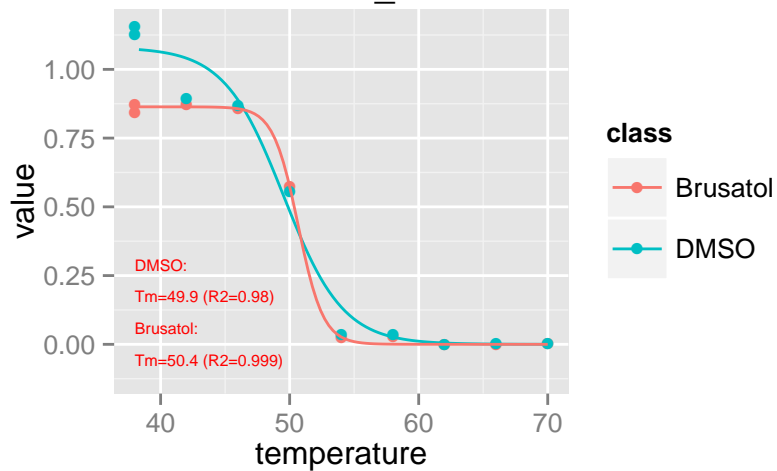

Prot: A8KAI6\_HUMAN

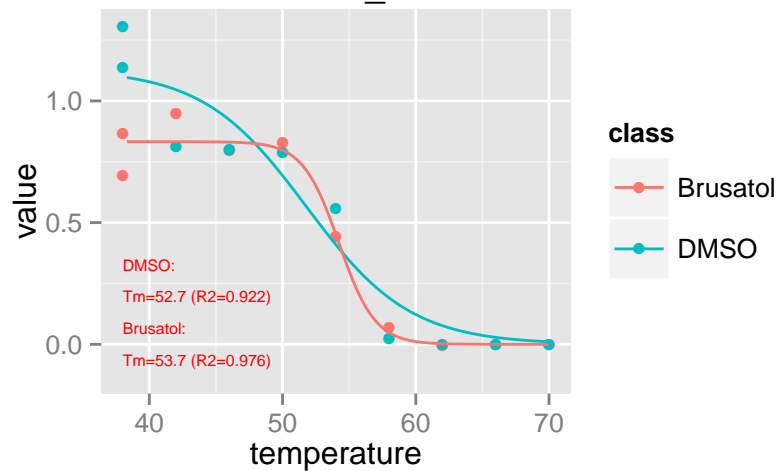

Prot: A9CQZ4\_HUMAN

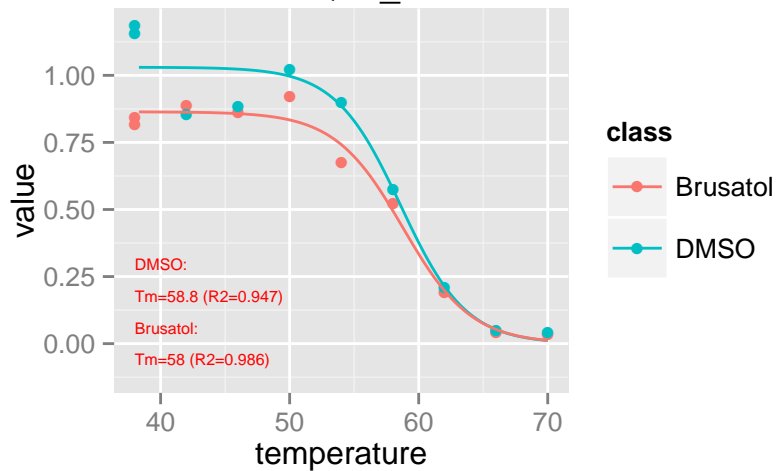

Prot: AAAT\_HUMAN

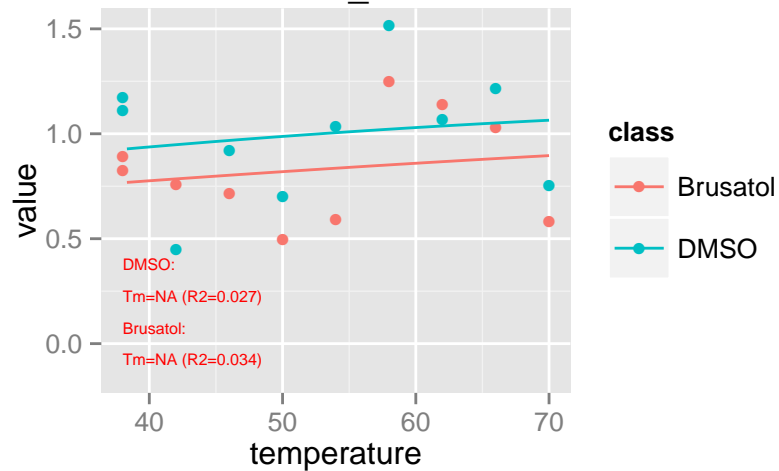

Prot: AAC5\_HUMAN

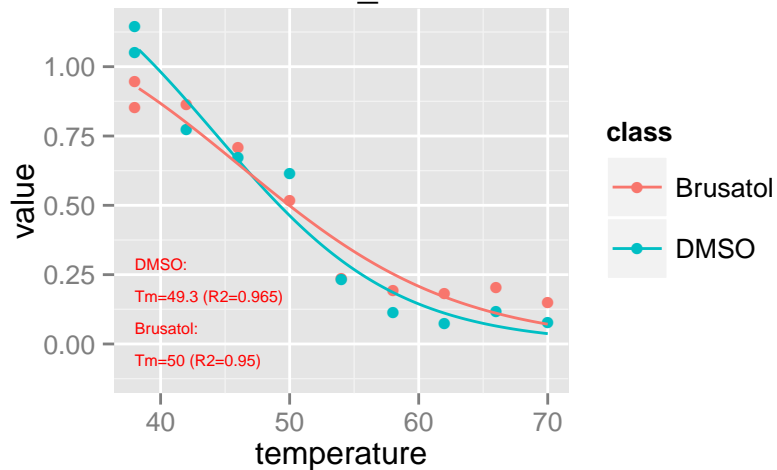

Prot: AAGAB\_HUMAN

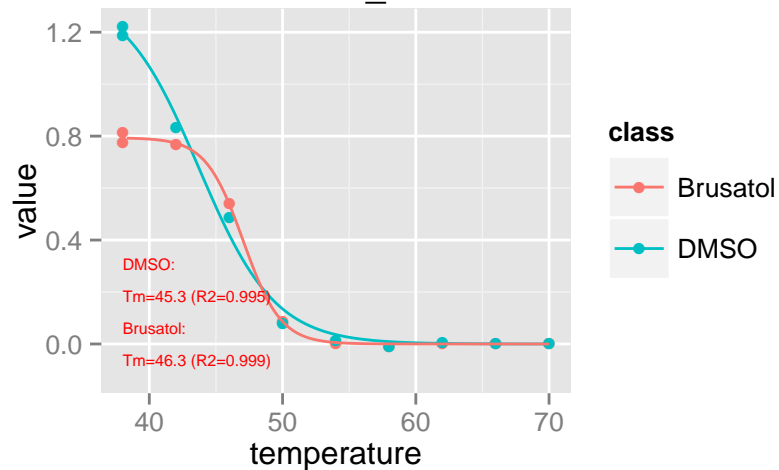

Prot: AAK1\_HUMAN

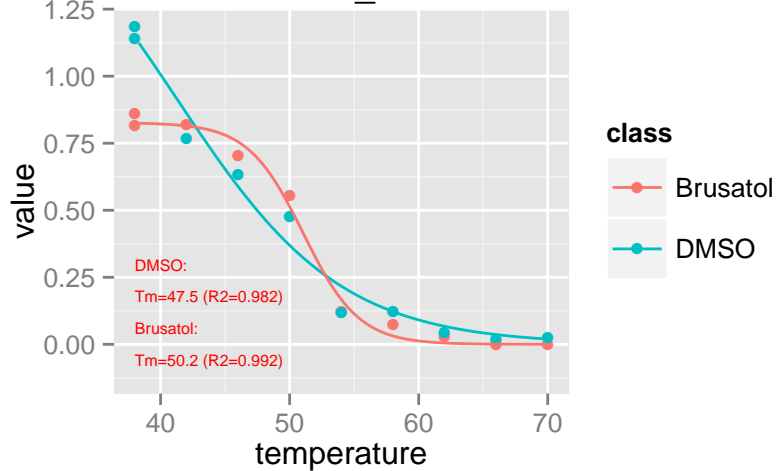

Prot: AAKG1\_HUMAN

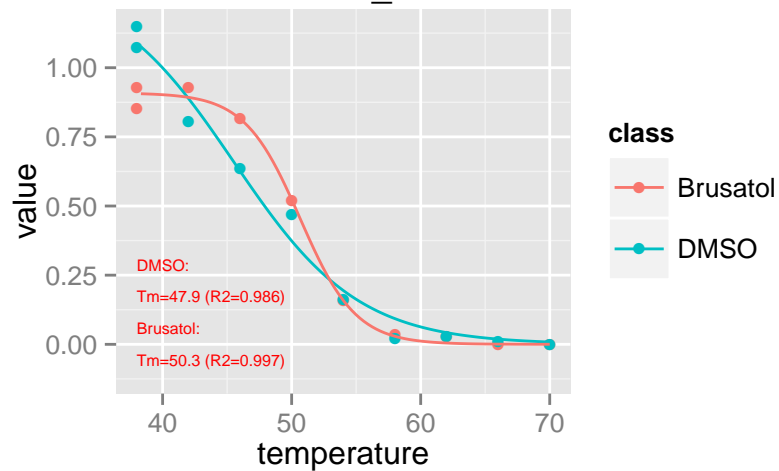

Prot: AAMP\_HUMAN

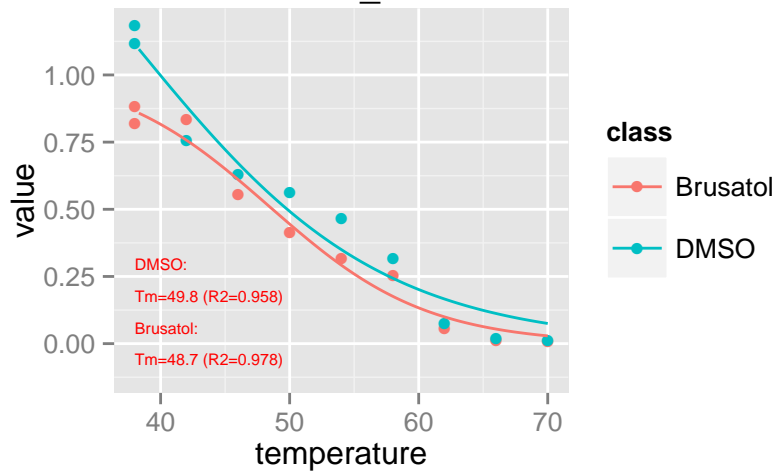

Prot: AAPK1\_HUMAN

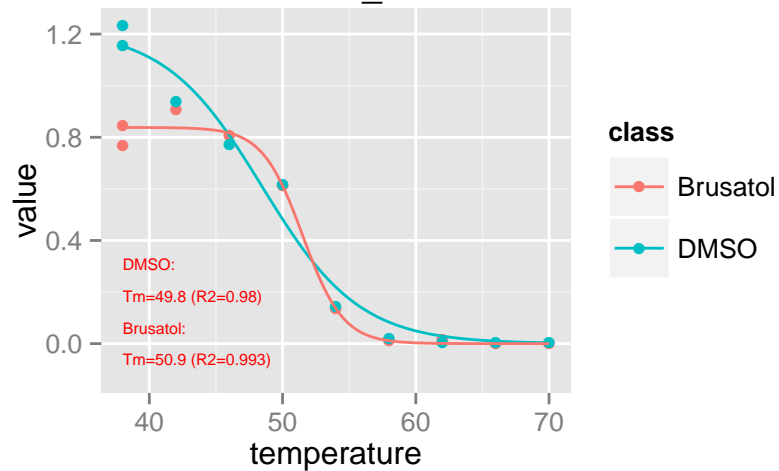

Prot: AASD1\_HUMAN

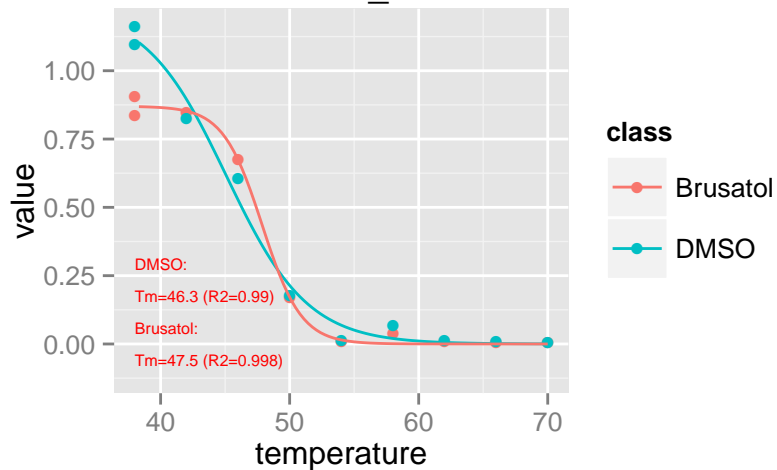

Prot: AATC\_HUMAN

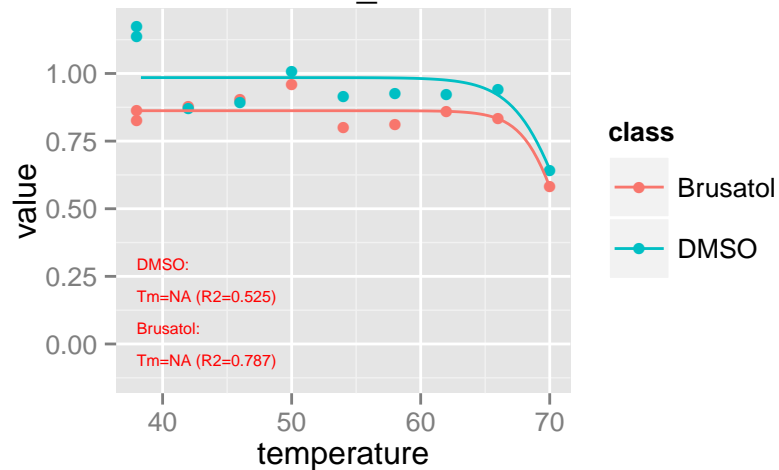

Prot: AATM\_HUMAN

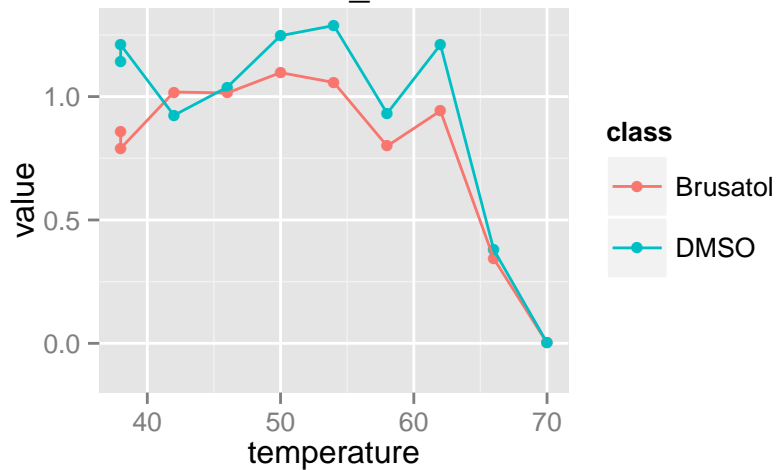

Prot: ABCE1\_HUMAN

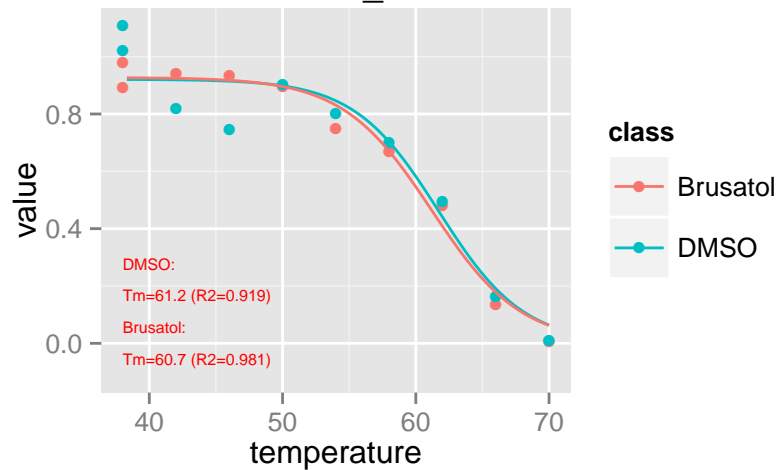



Prot: ABCF1\_HUMAN

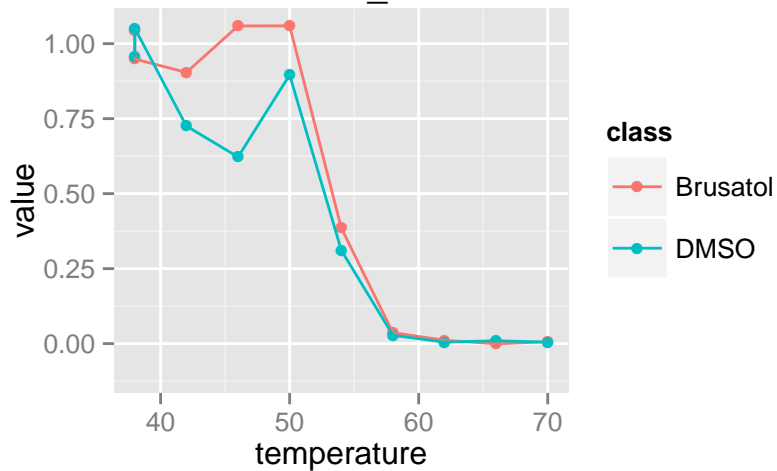

Prot: ABCF2\_HUMAN

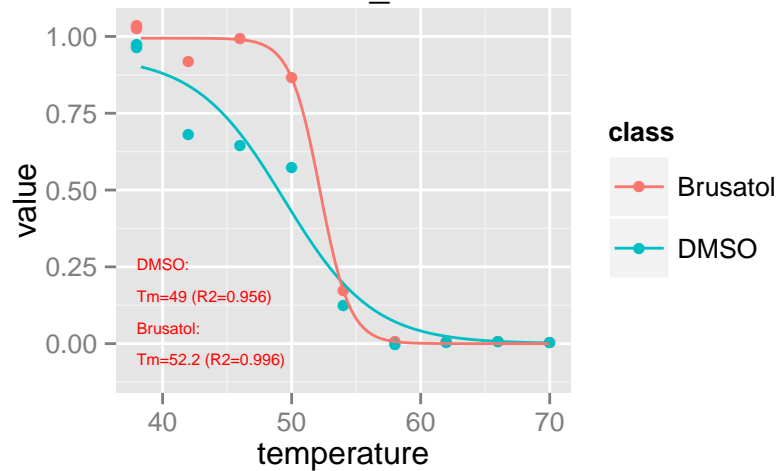

Prot: ABCF3\_HUMAN

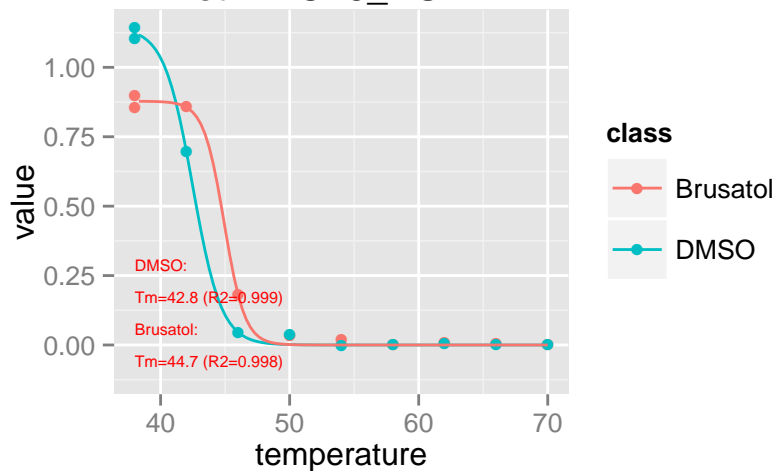

Prot: ABHDA\_HUMAN

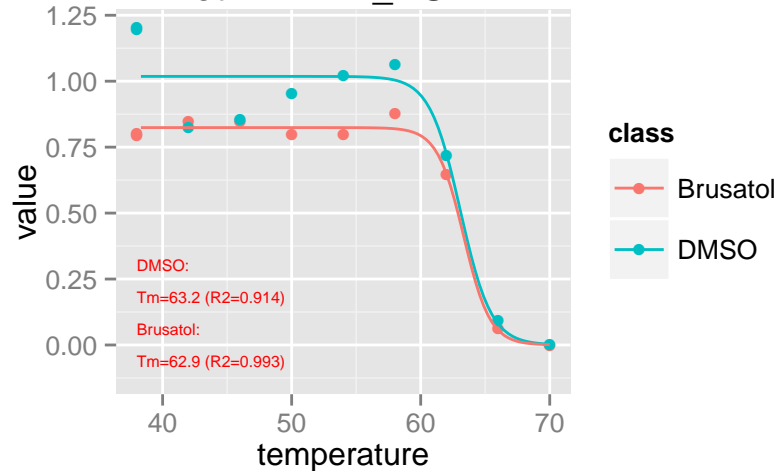

Prot: ABHDB\_HUMAN

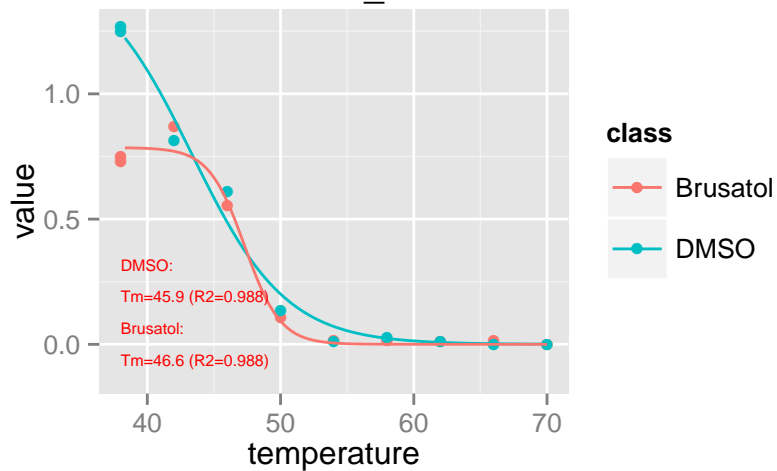

Prot: ABHEB\_HUMAN

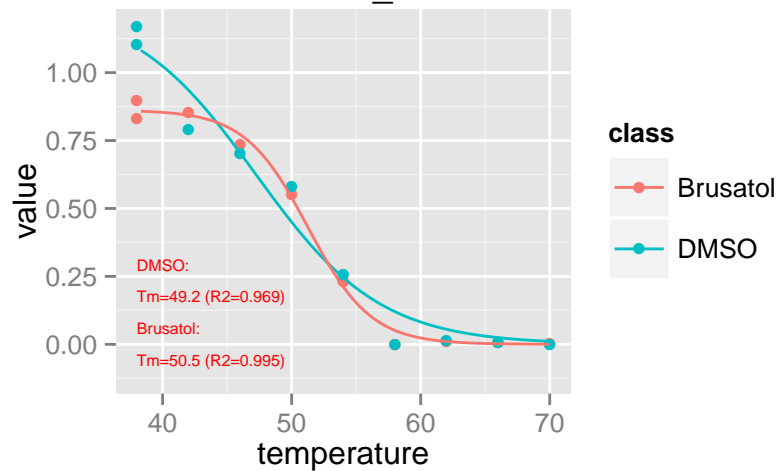

Prot: ABI1\_HUMAN

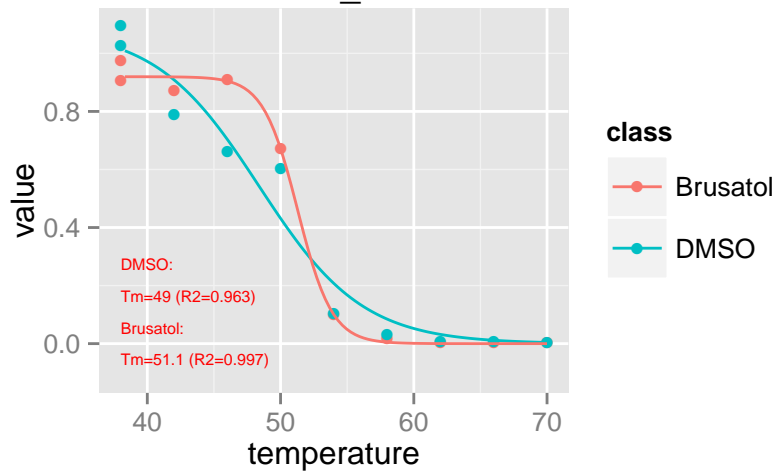

Prot: ABI2\_HUMAN

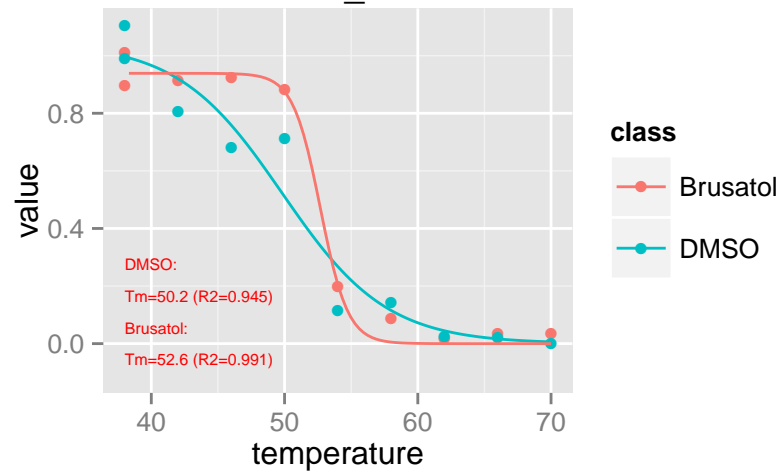

Prot: ABR\_HUMAN

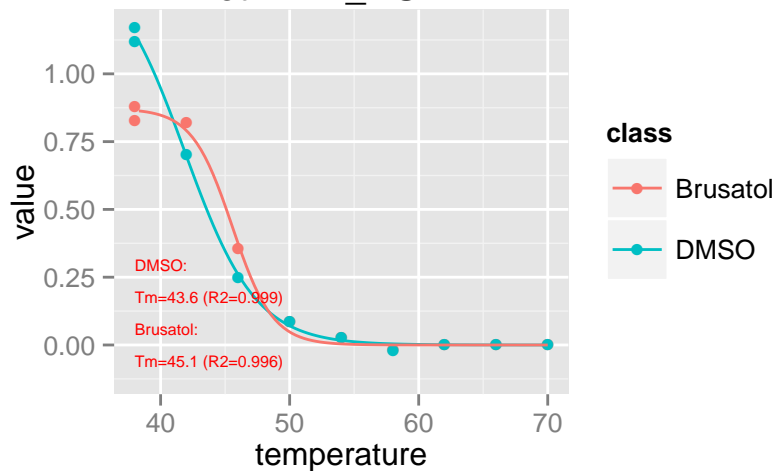

Prot: ACACA\_HUMAN

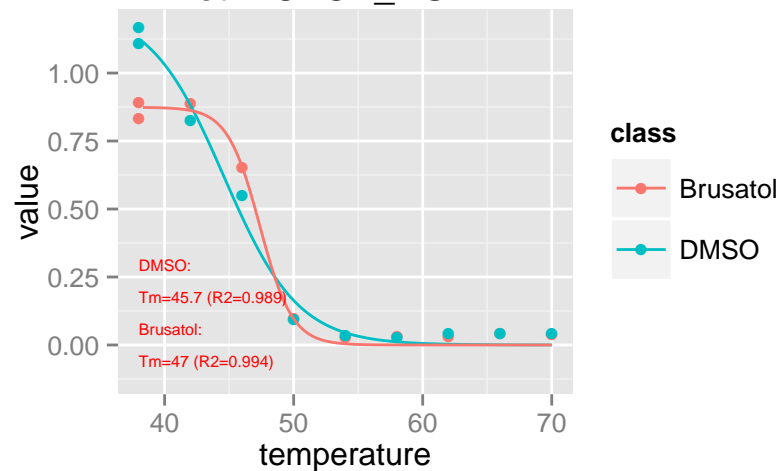

Prot: ACAD9\_HUMAN

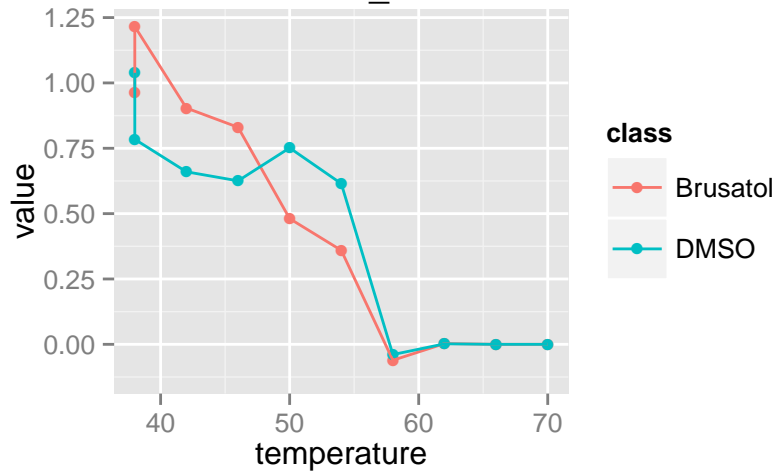

Prot: ACADM\_HUMAN

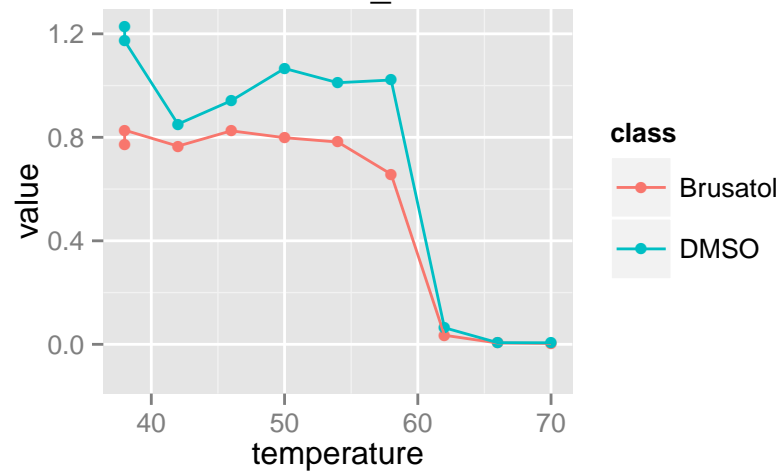

Prot: ACADS\_HUMAN

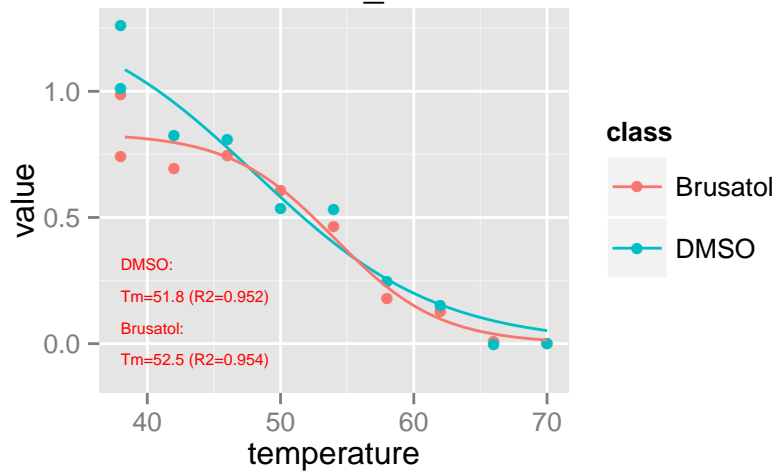

Prot: ACADV\_HUMAN

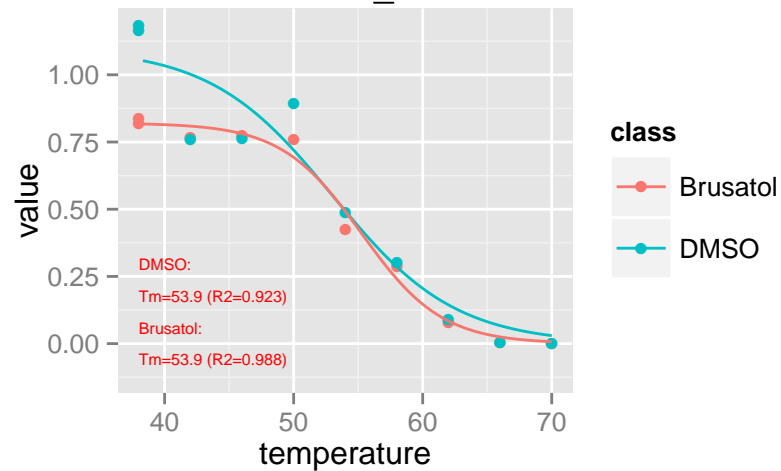

Prot: ACAP2\_HUMAN

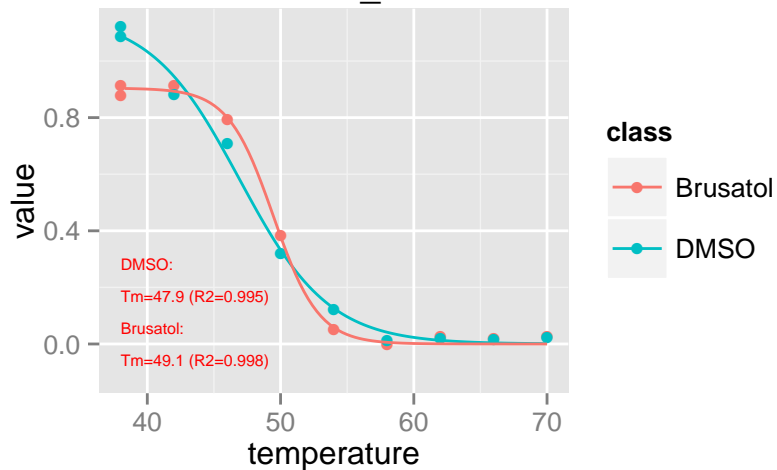

Prot: ACBP\_HUMAN

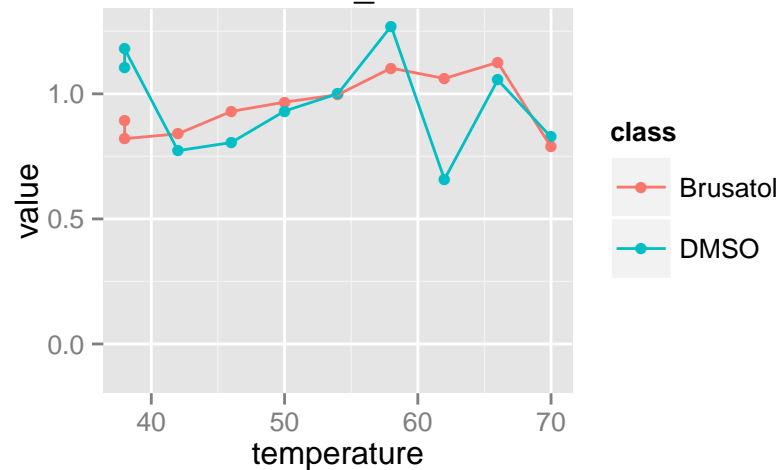

Prot: ACDSB\_HUMAN

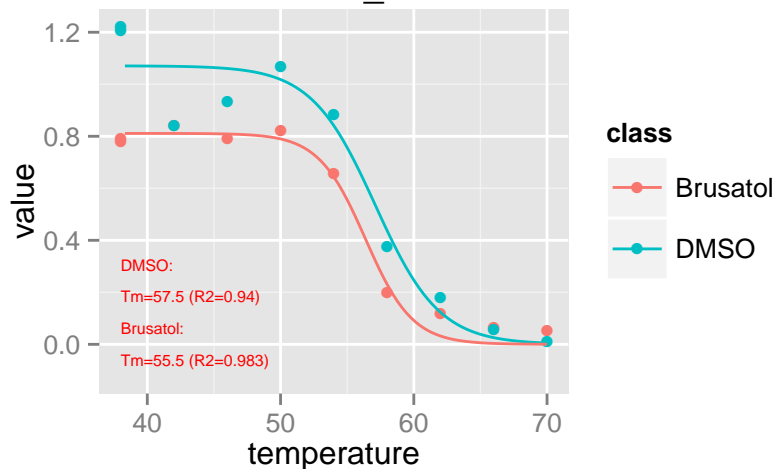

Prot: ACINU\_HUMAN

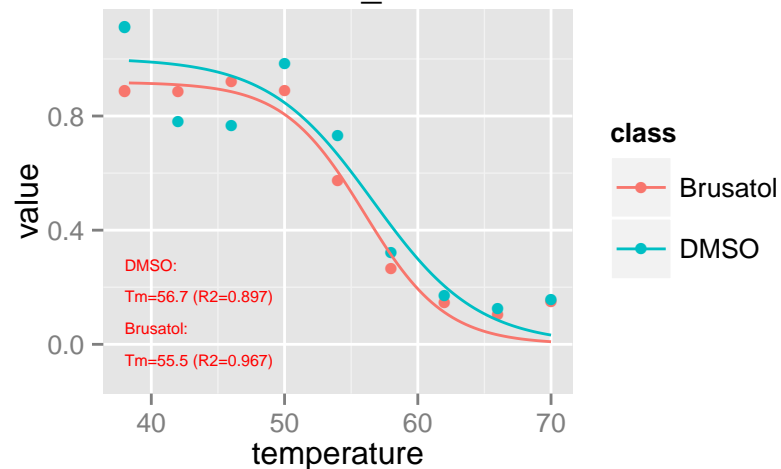

Prot: ACL6A\_HUMAN

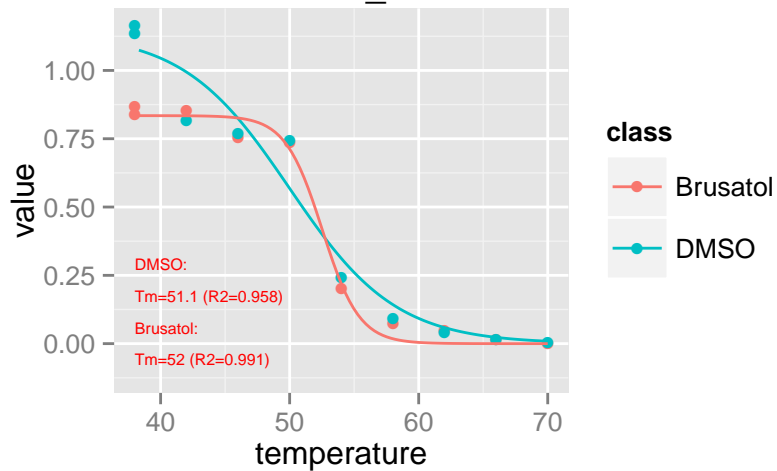

Prot: ACLY\_HUMAN

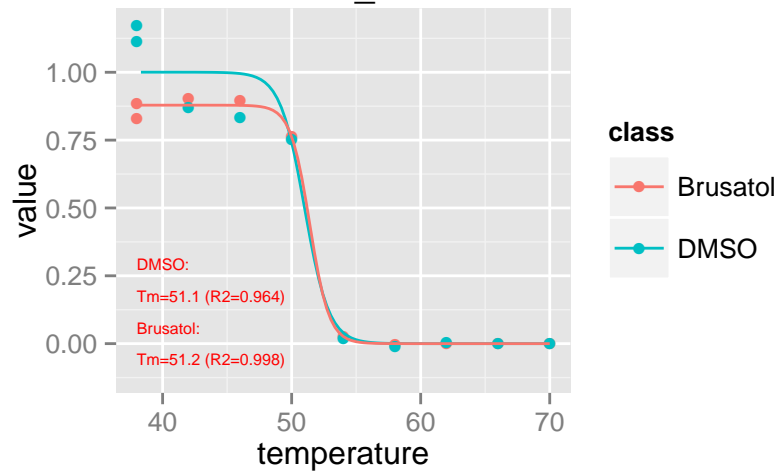

Prot: ACO13\_HUMAN

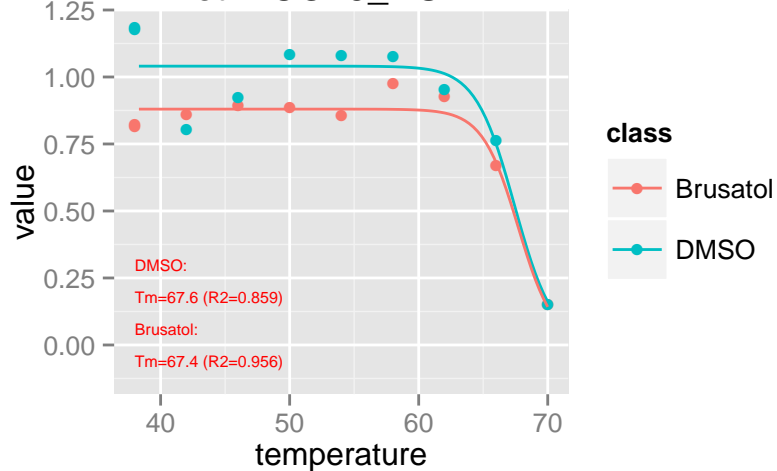

Prot: ACOC\_HUMAN

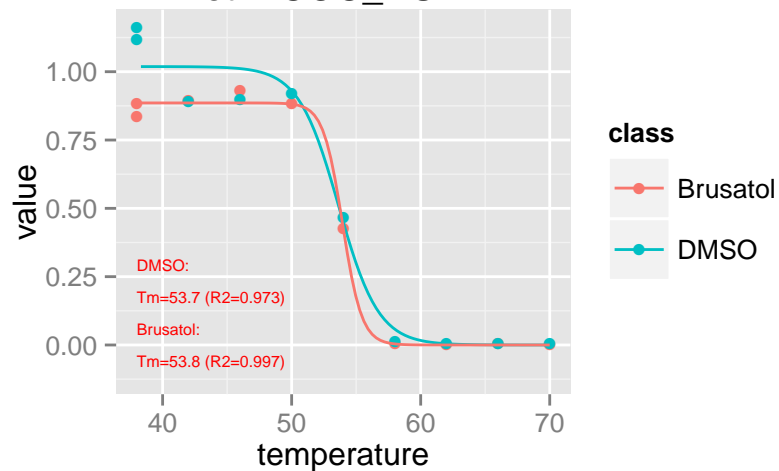

Prot: ACON\_HUMAN

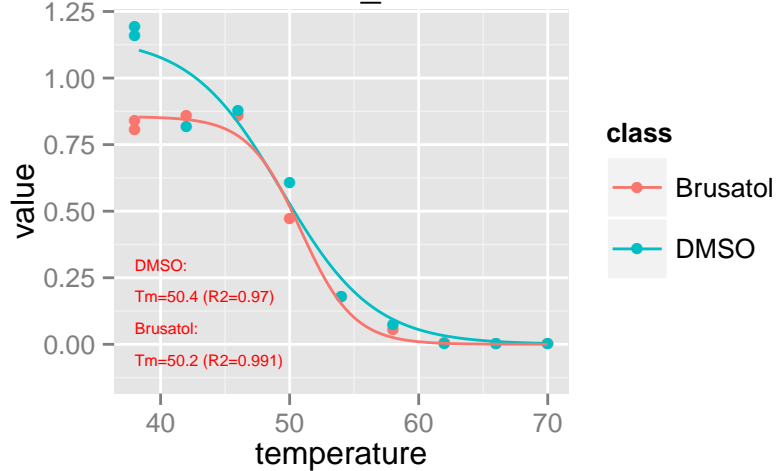

Prot: ACOT1\_HUMAN

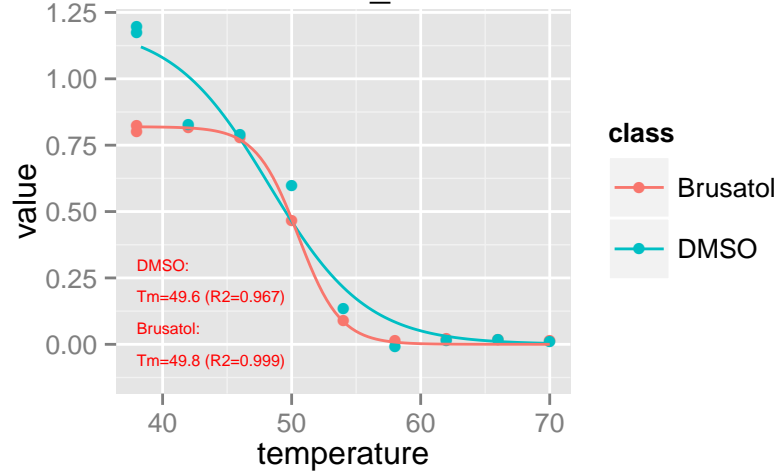

Prot: ACOT9\_HUMAN

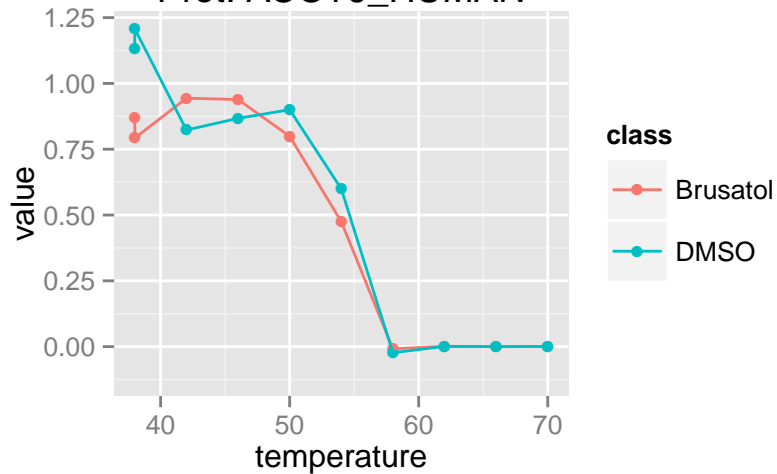

Prot: ACOX1\_HUMAN

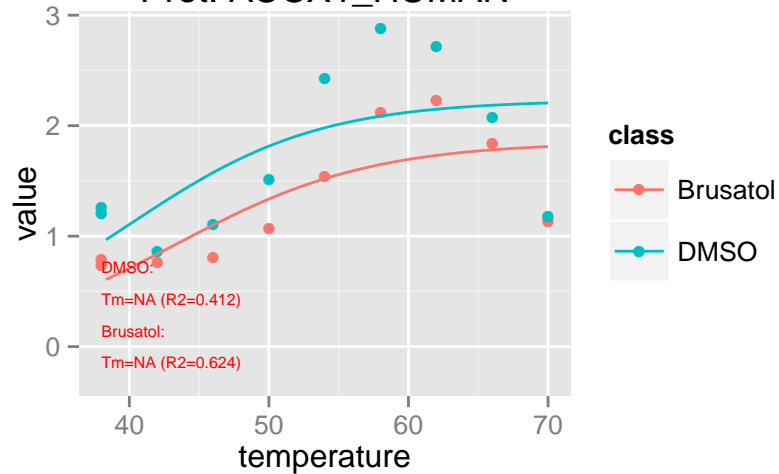

Prot: ACPH\_HUMAN

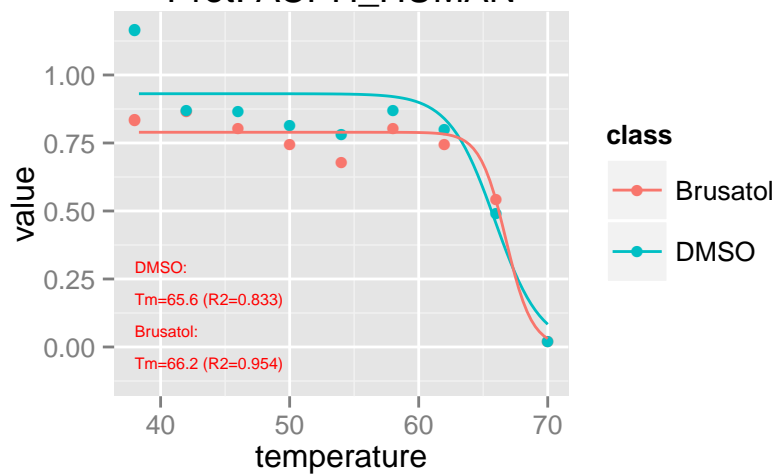

Prot: ACPM\_HUMAN

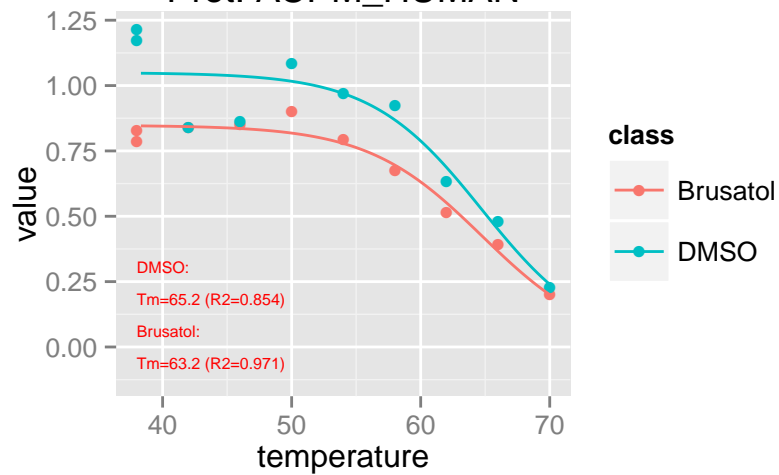

Prot: ACSA\_HUMAN

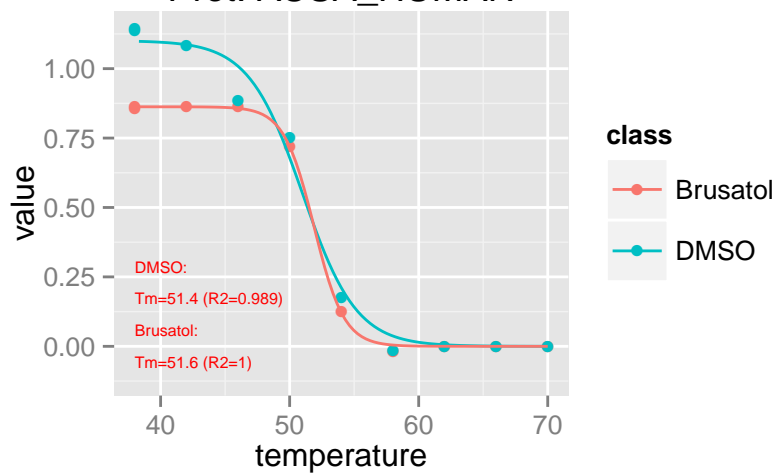

Prot: ACSF2\_HUMAN

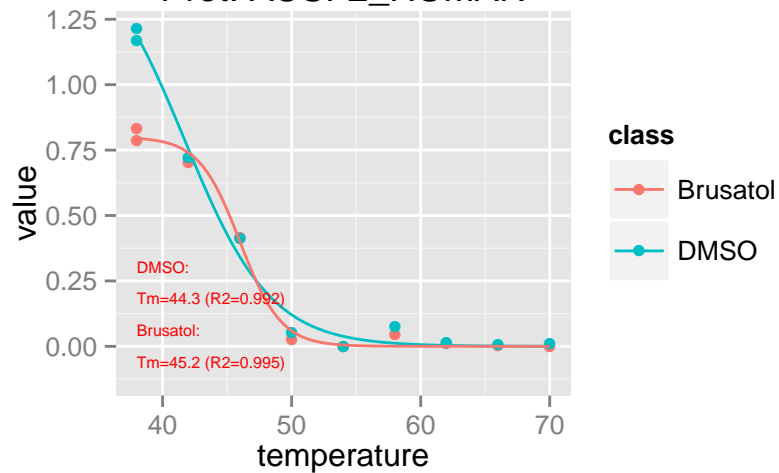

Prot: ACSF3\_HUMAN

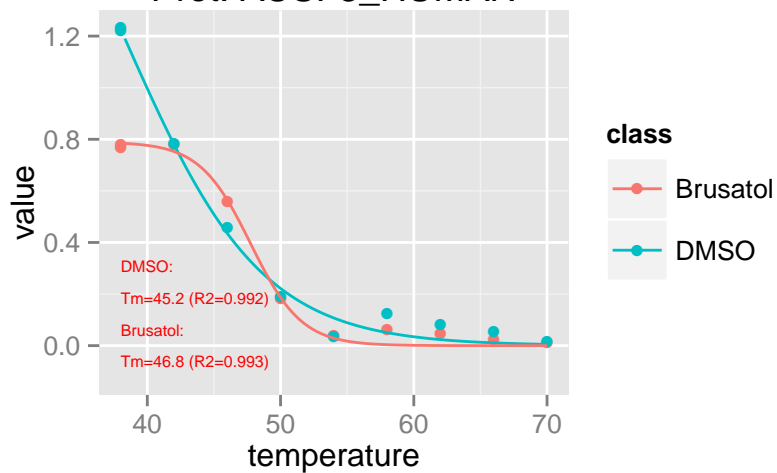

Prot: ACSL4\_HUMAN

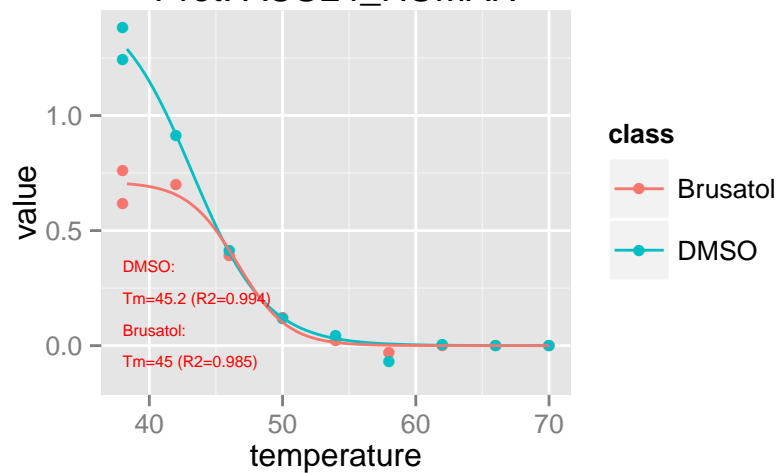

Prot: ACTA\_HUMAN

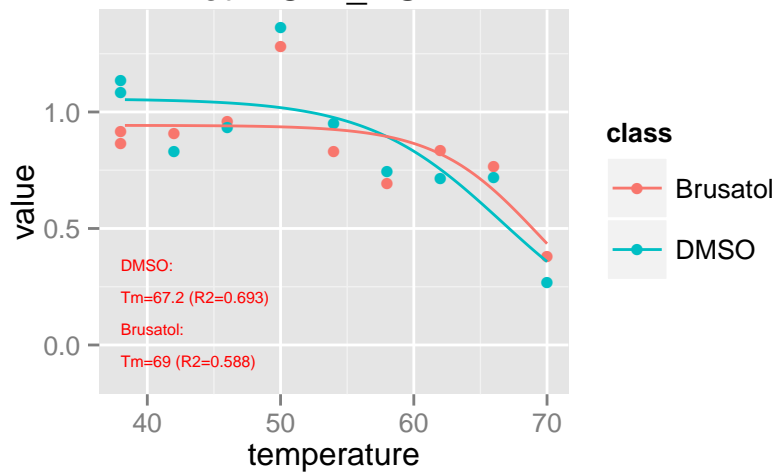

Prot: ACTB\_HUMAN

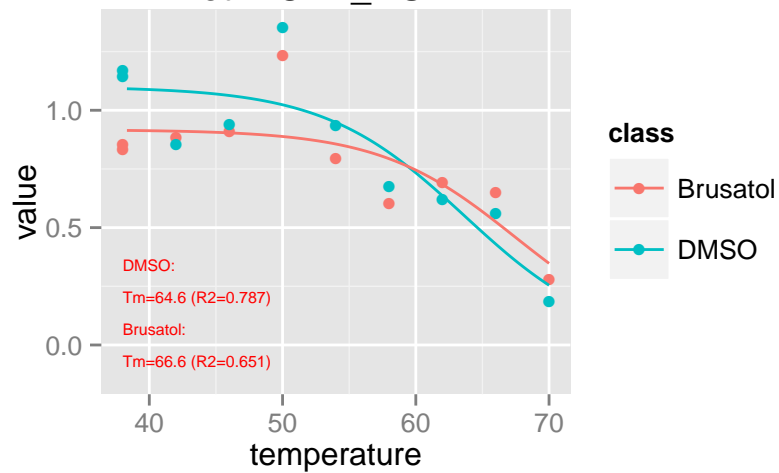

Prot: ACTBL\_HUMAN

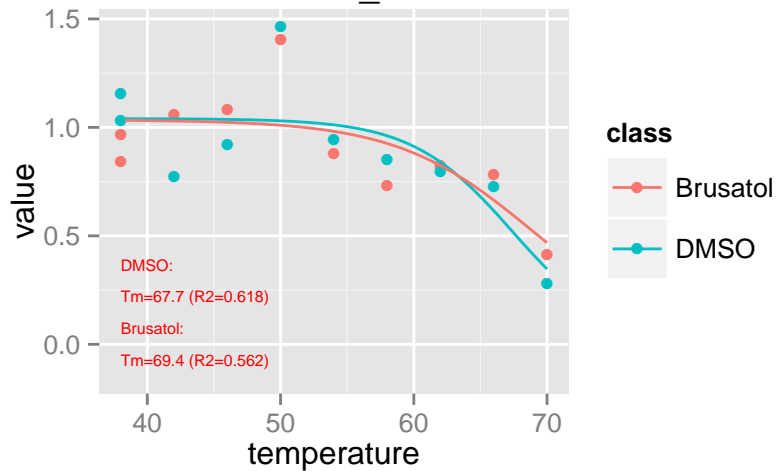

Prot: ACTBM\_HUMAN

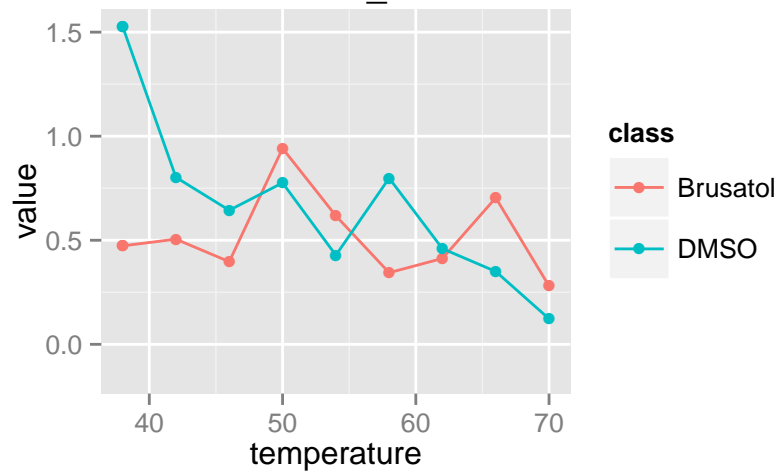

Prot: ACTG\_HUMAN

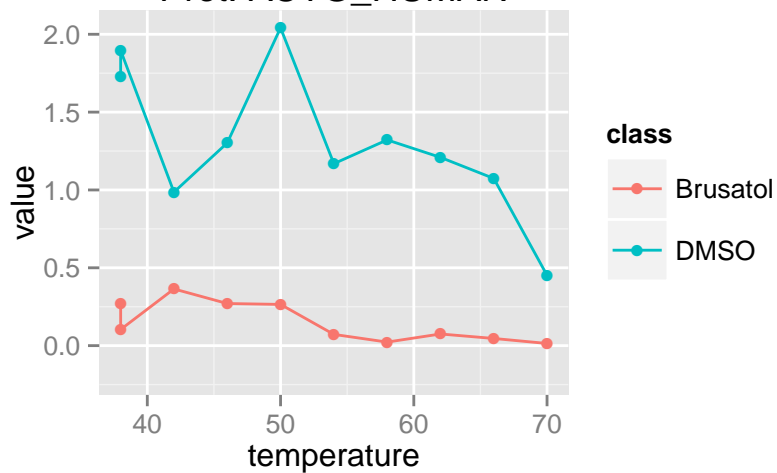

Prot: ACTN1\_HUMAN

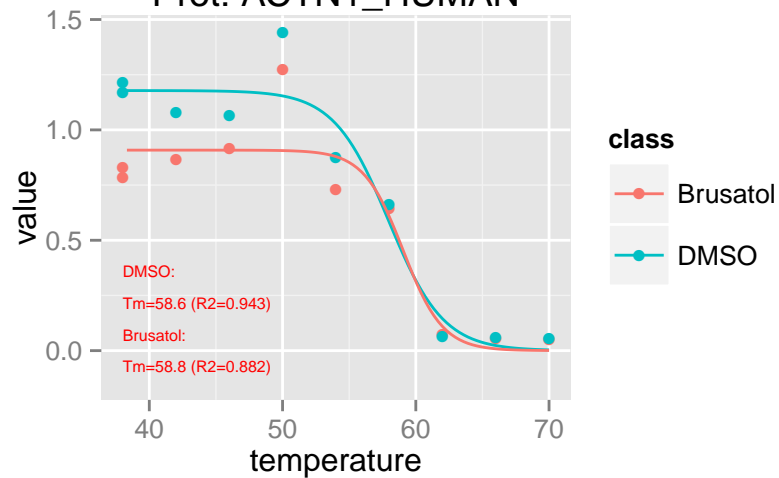

Prot: ACTN4\_HUMAN

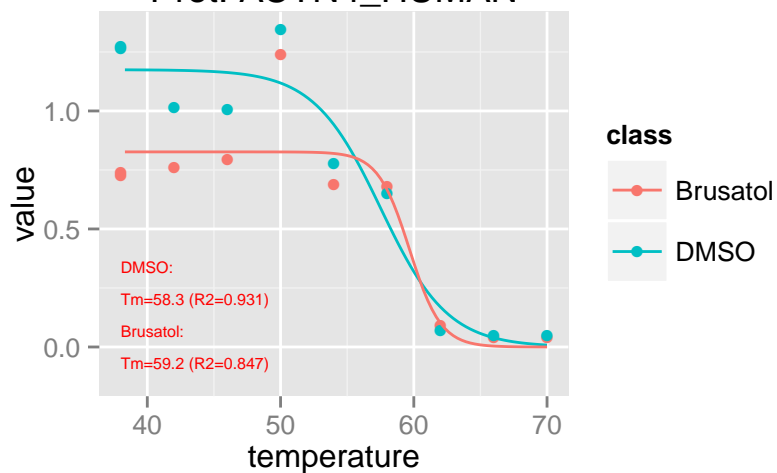

Prot: ACTY\_HUMAN

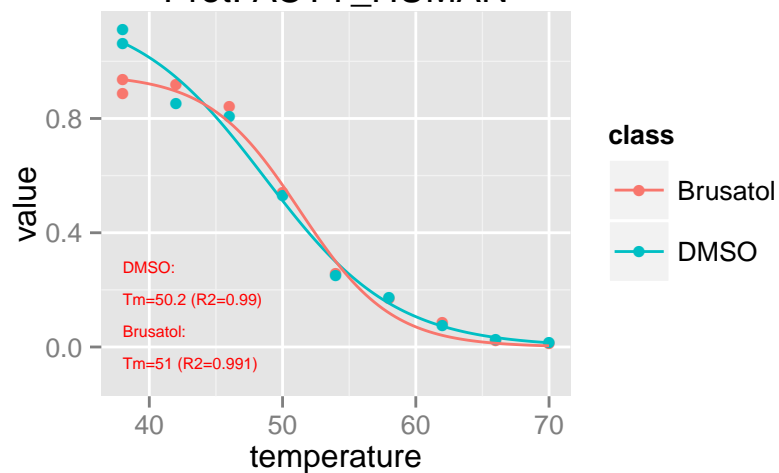

Prot: ACTZ\_HUMAN

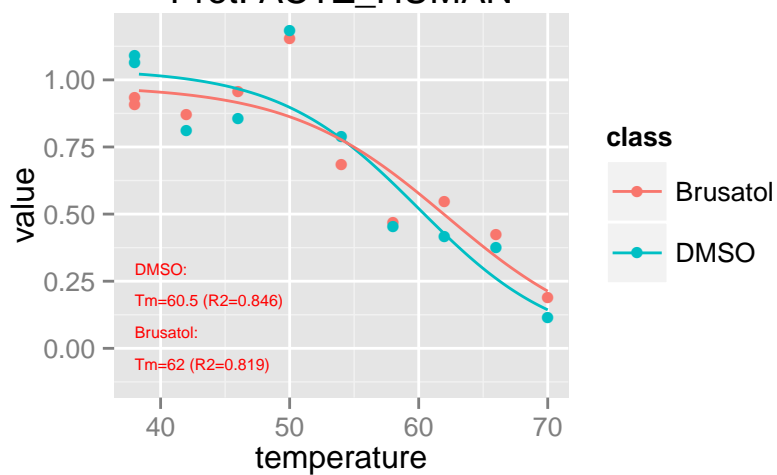

Prot: ACY1\_HUMAN

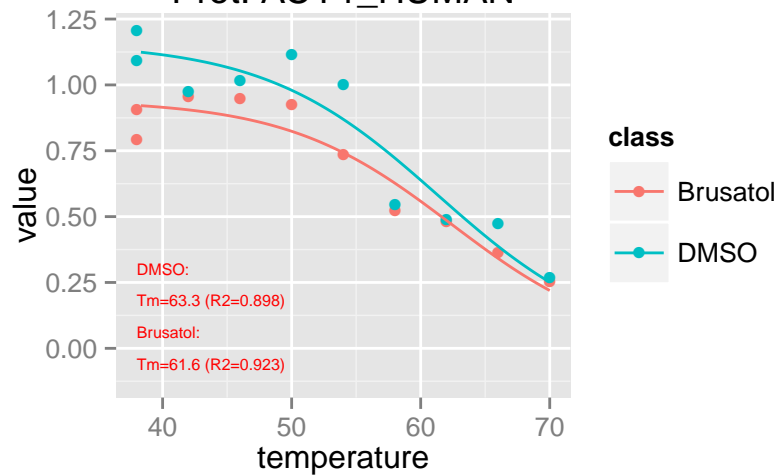

Prot: ADA\_HUMAN

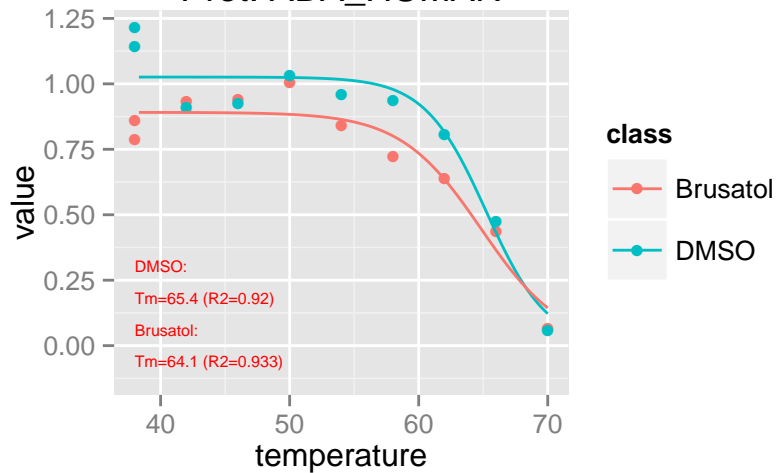

Prot: ADCK4\_HUMAN

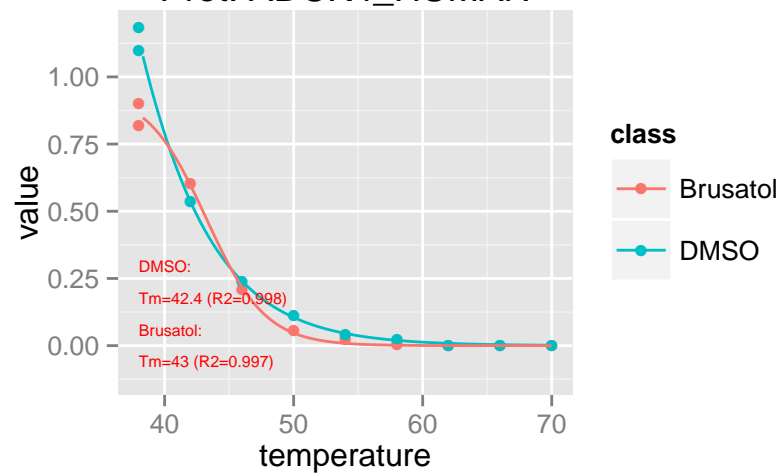

Prot: ADDA\_HUMAN

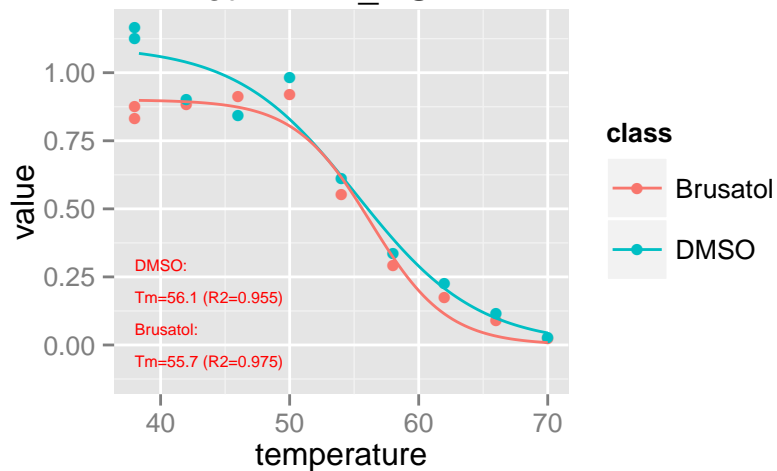

Prot: ADDB\_HUMAN

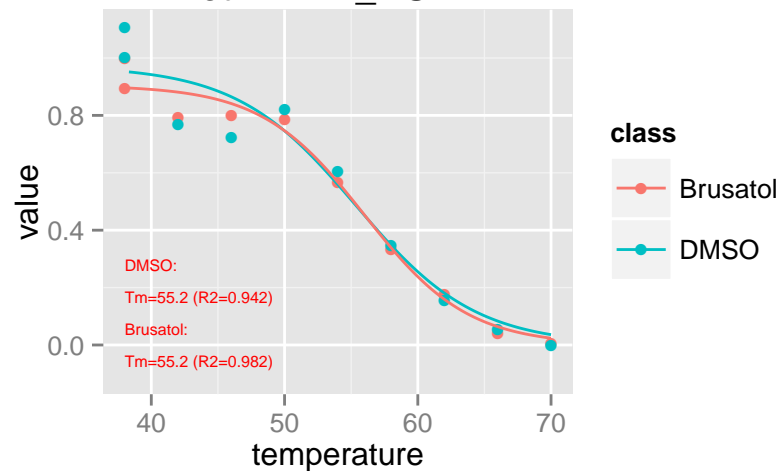

Prot: ADDG\_HUMAN

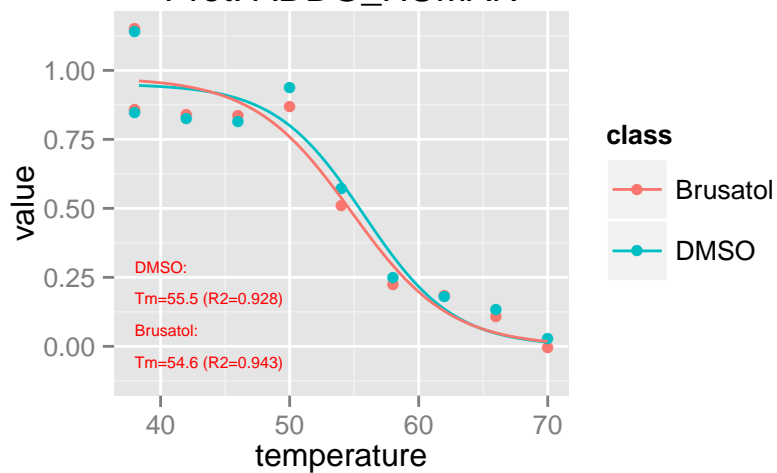

Prot: ADHX\_HUMAN

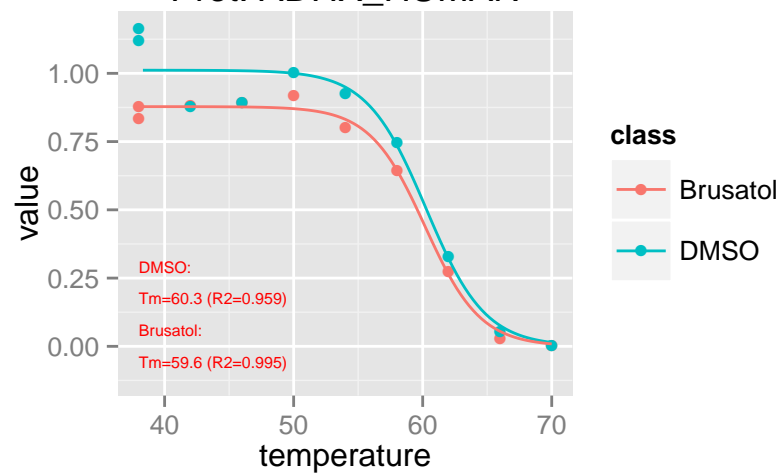



Prot: ADK\_HUMAN

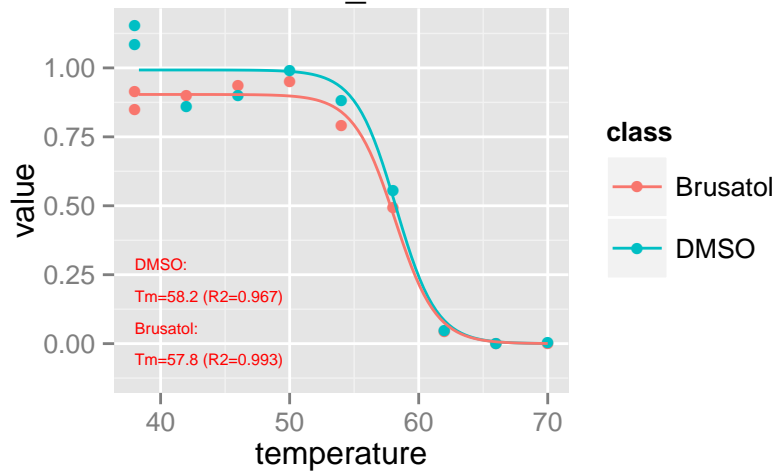

Prot: ADNP\_HUMAN

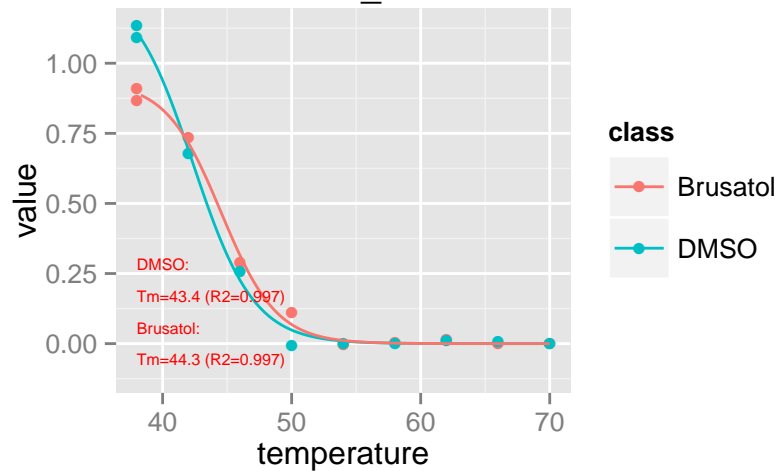

Prot: ADPPT\_HUMAN

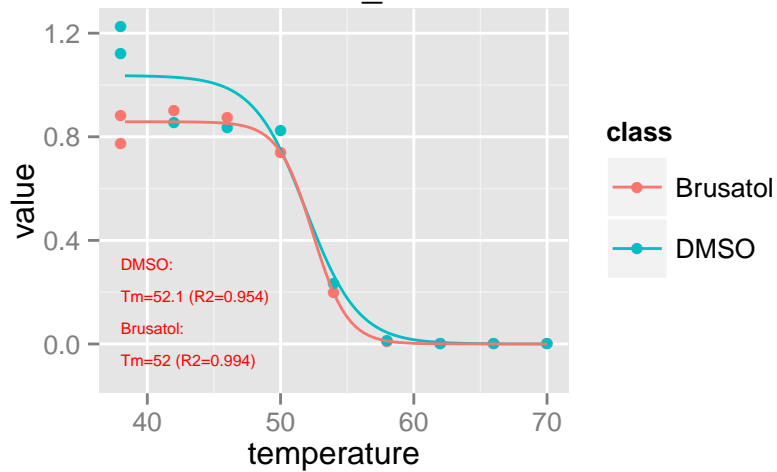

Prot: ADRM1\_HUMAN

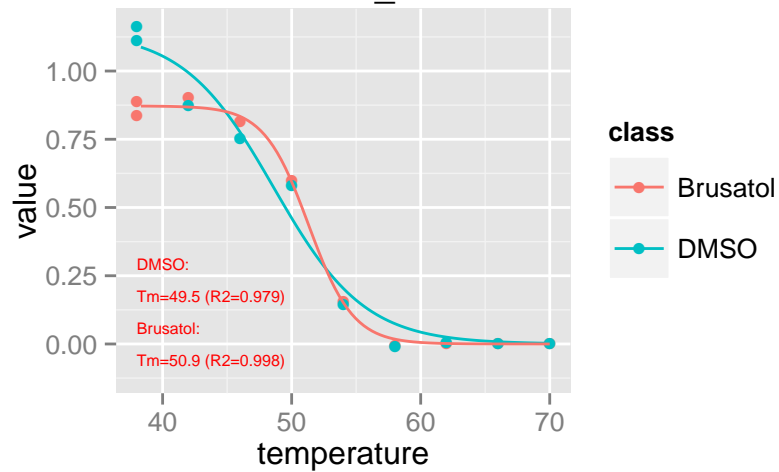

Prot: ADRO\_HUMAN

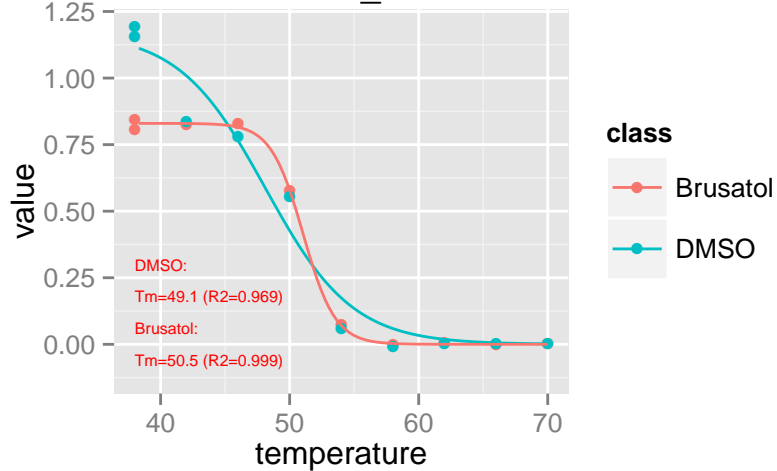

Prot: ADX\_HUMAN

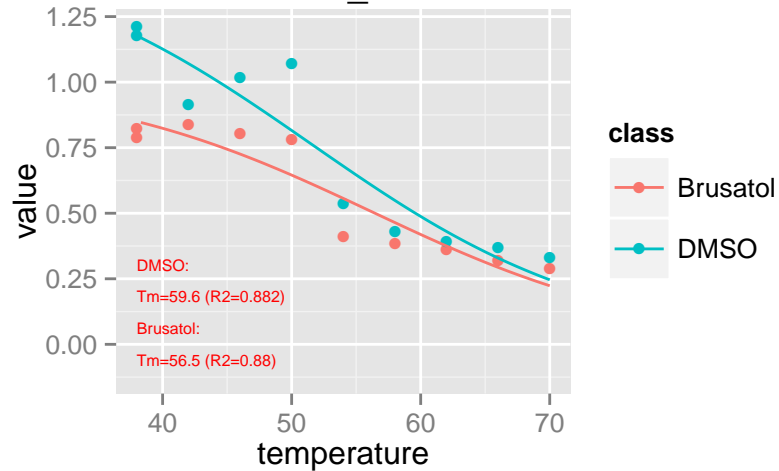

Prot: ADXL\_HUMAN

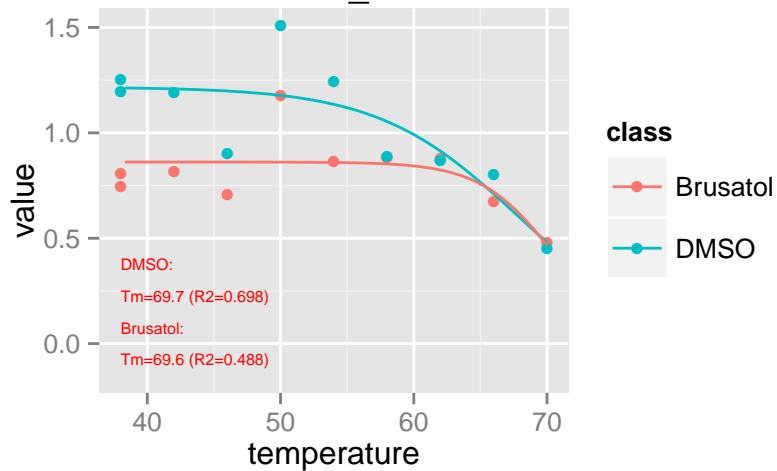

Prot: AEDO\_HUMAN

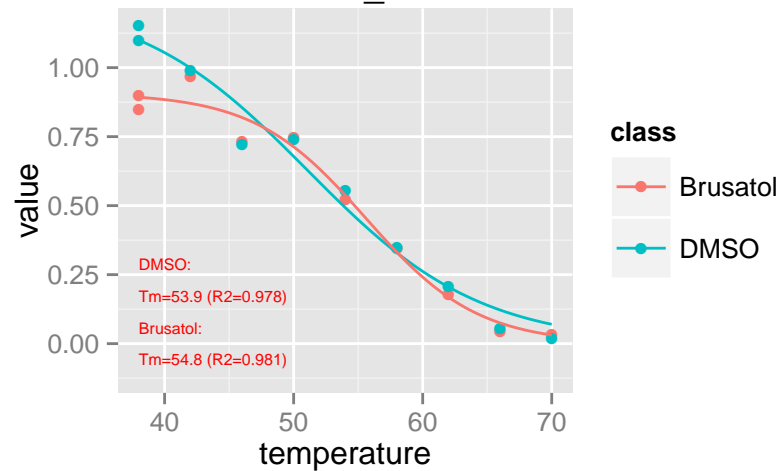

Prot: AF1L2\_HUMAN

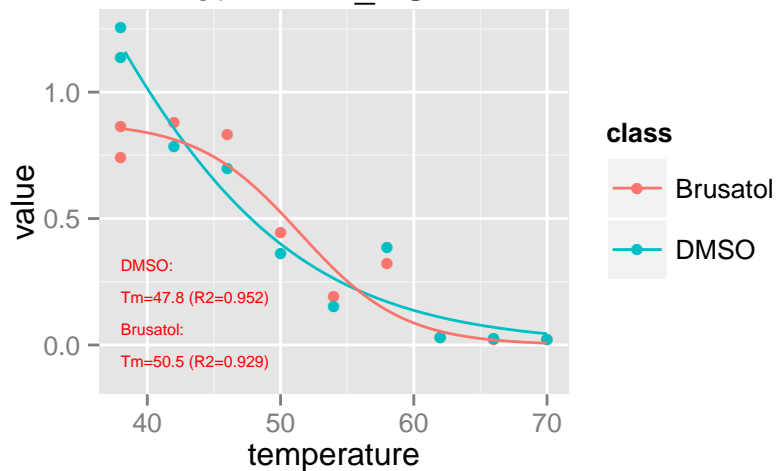

Prot: AFTIN\_HUMAN

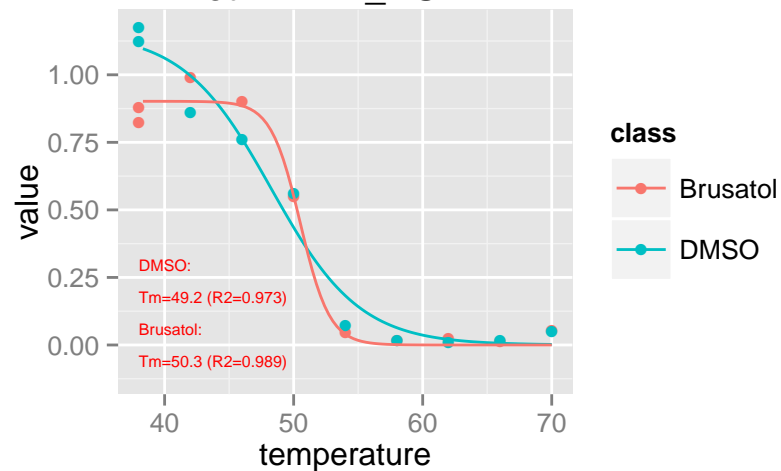

Prot: AGAL\_HUMAN

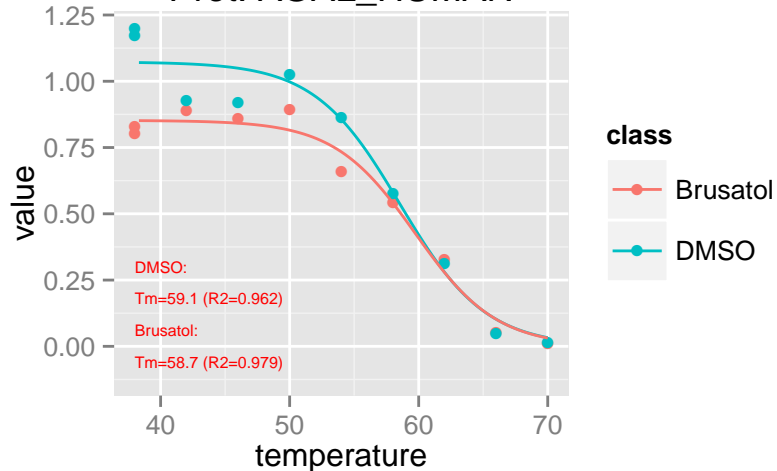

Prot: AGFG1\_HUMAN

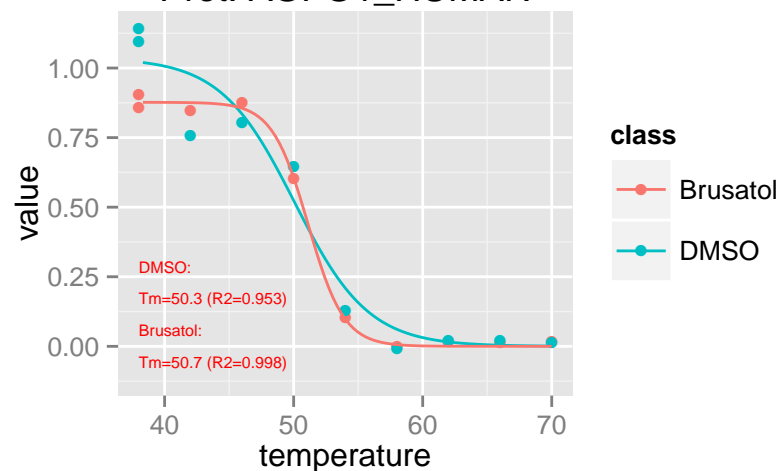

Prot: AGM1\_HUMAN

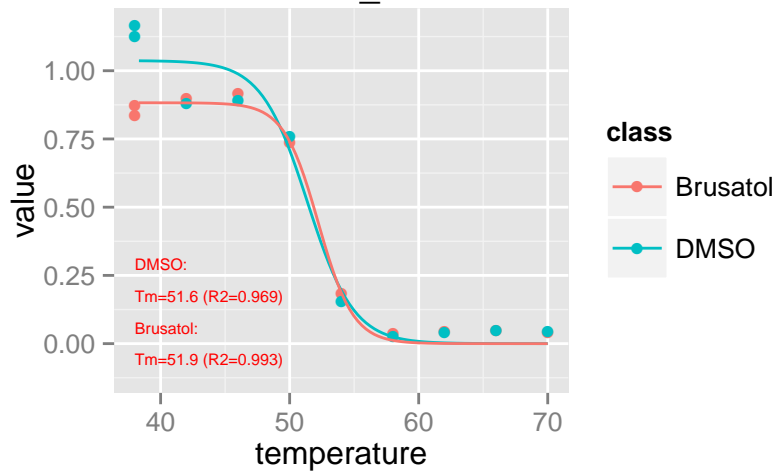

Prot: AGR2\_HUMAN

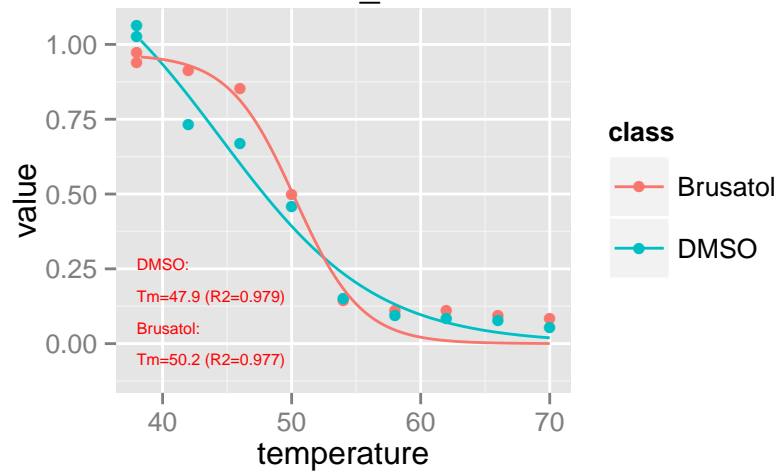

Prot: AHNK\_HUMAN

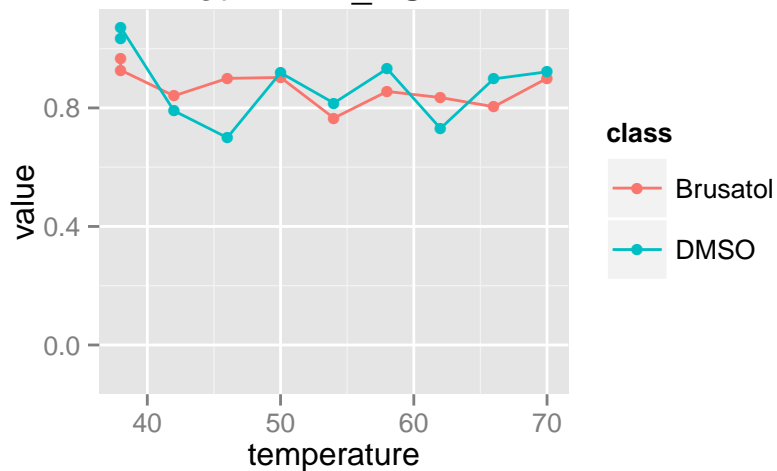

Prot: AHNK2\_HUMAN

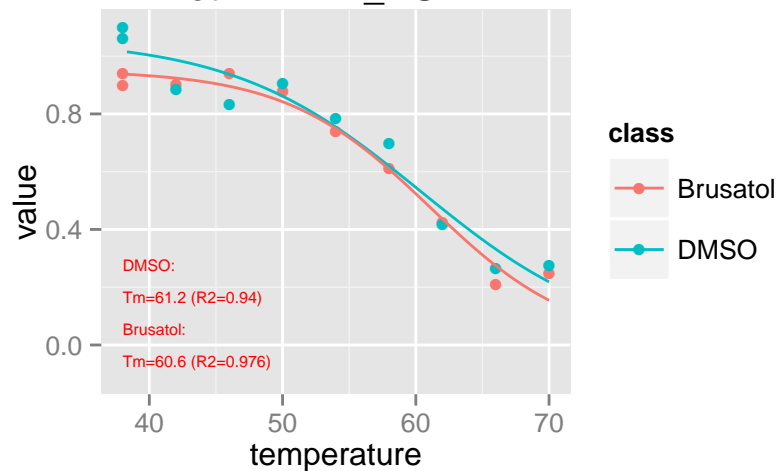

Prot: AHSA1\_HUMAN

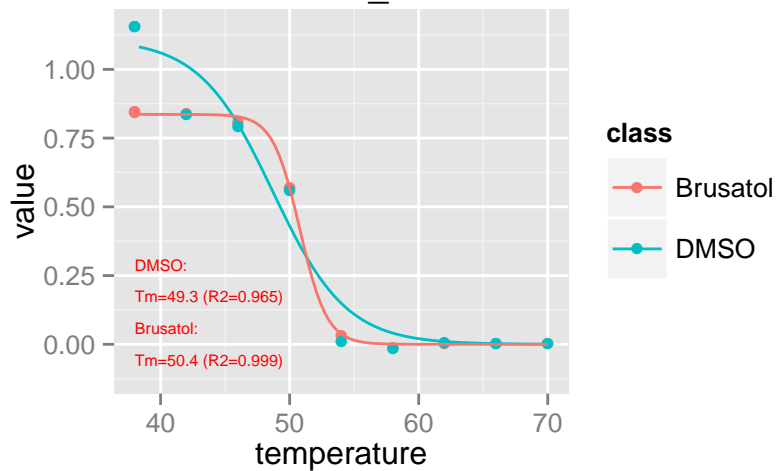

Prot: AIBP\_HUMAN

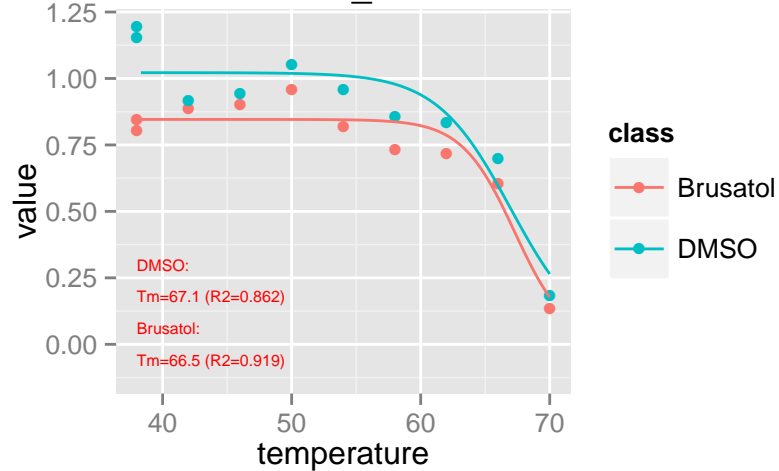

Prot: AIDA\_HUMAN

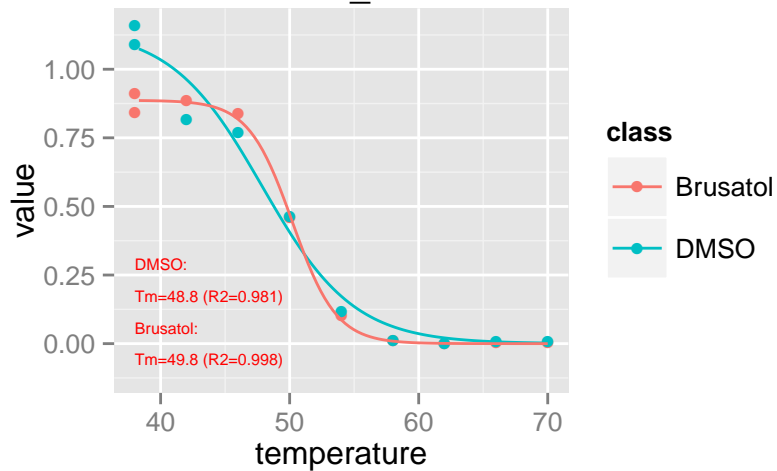

Prot: AIFM1\_HUMAN

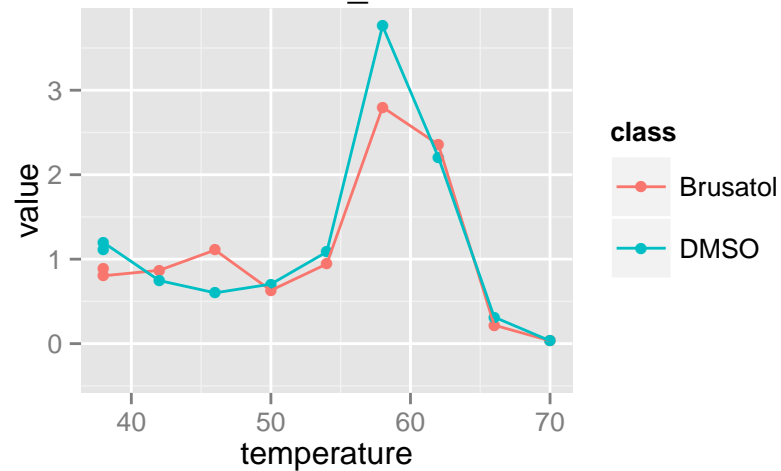

Prot: AIMP1\_HUMAN

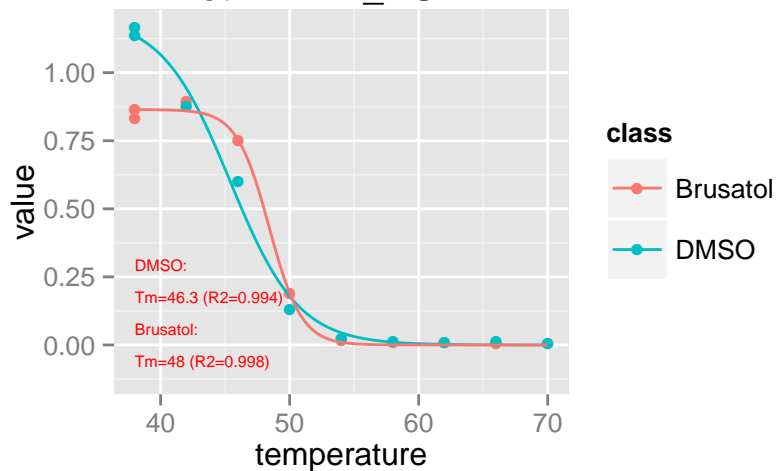

Prot: AIMP2\_HUMAN

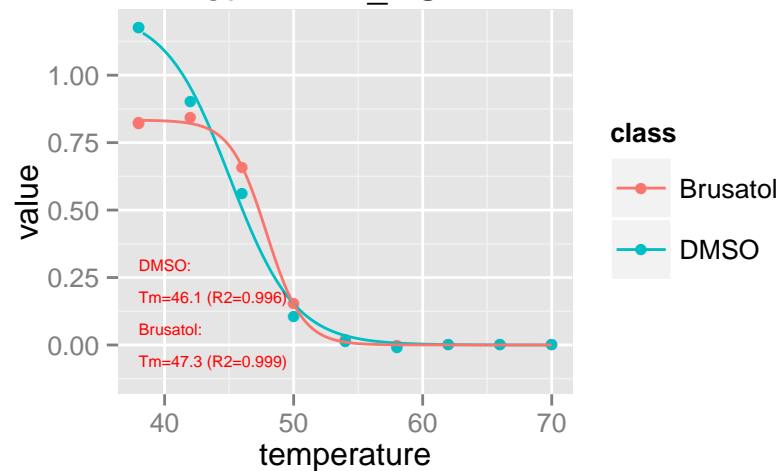

Prot: AIP\_HUMAN

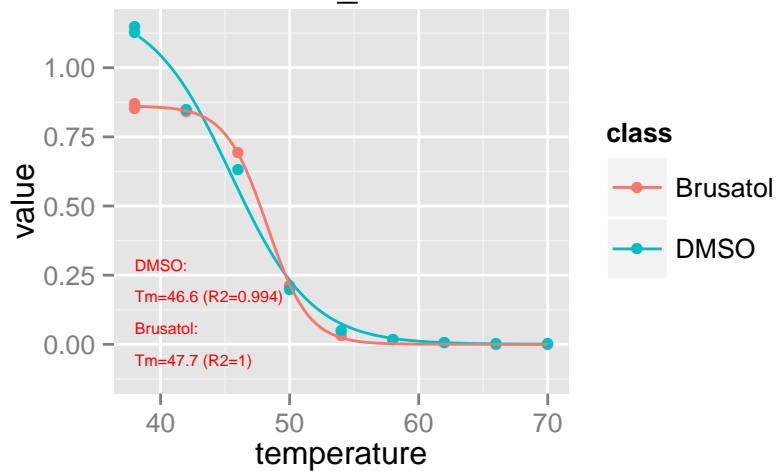

Prot: AK1A1\_HUMAN

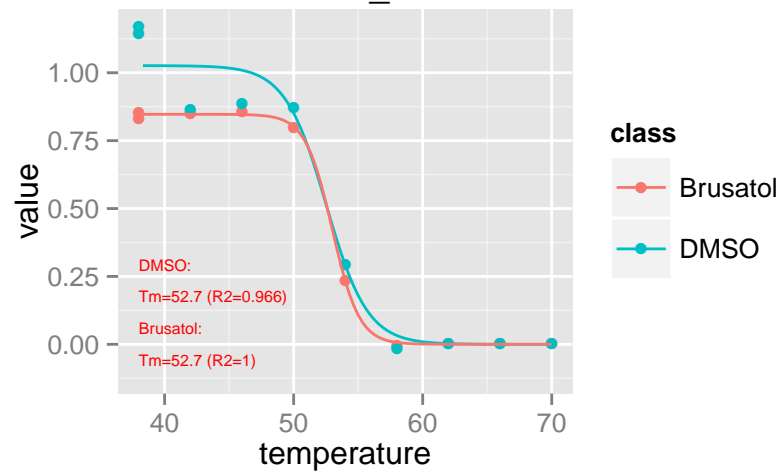

Prot: AK1BA\_HUMAN

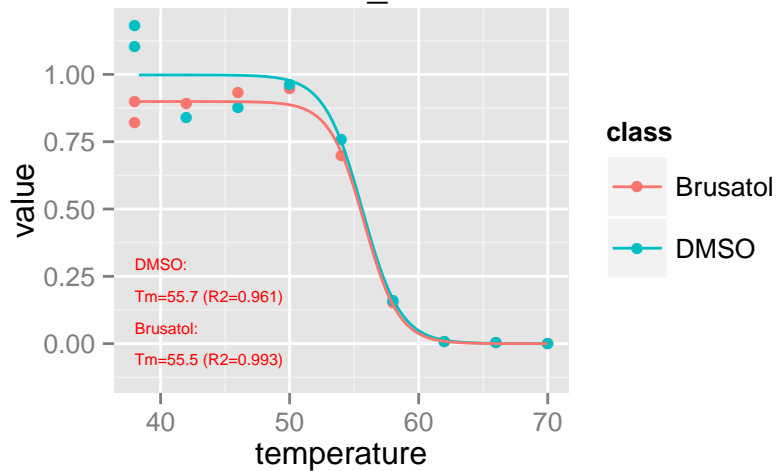

Prot: AK1C1\_HUMAN

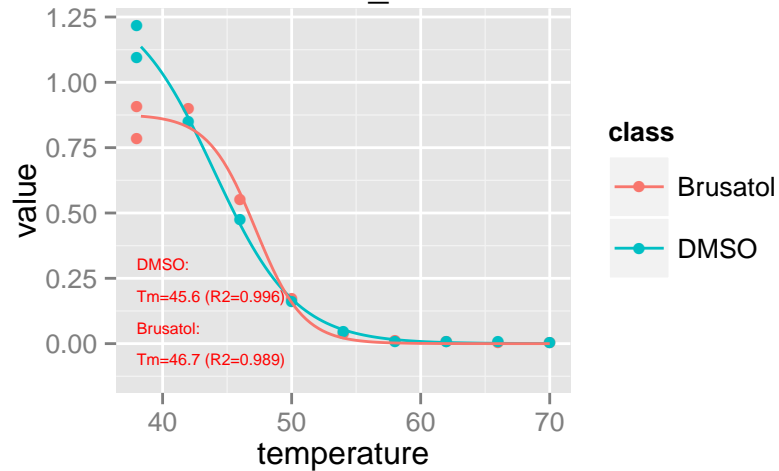

Prot: AK1C2\_HUMAN

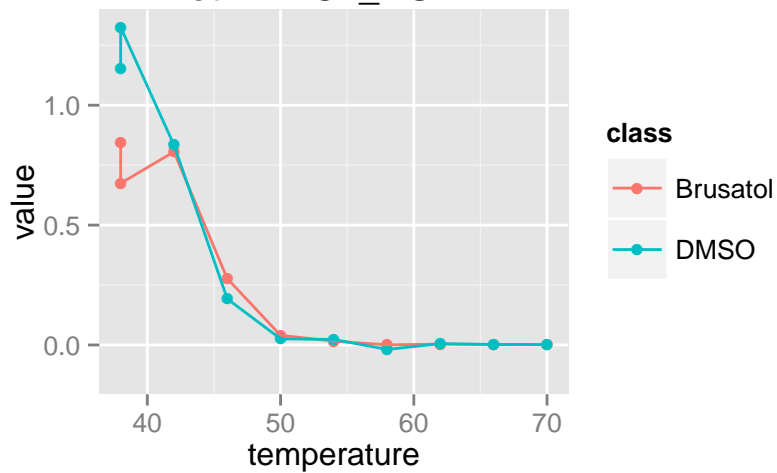

Prot: AK1C3\_HUMAN

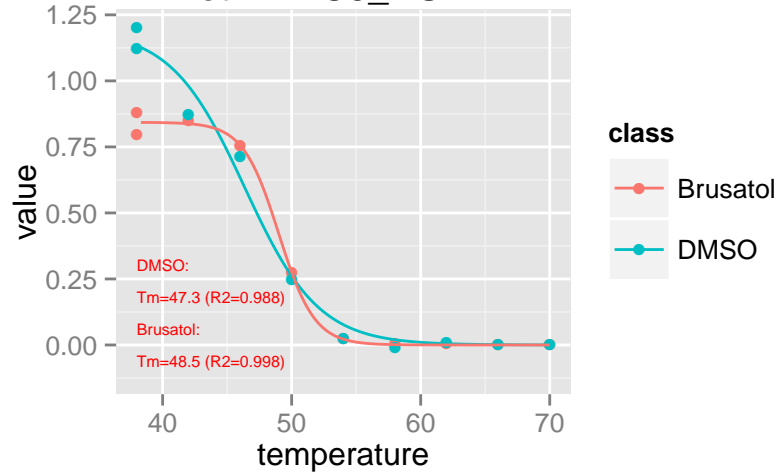

Prot: AKA10\_HUMAN

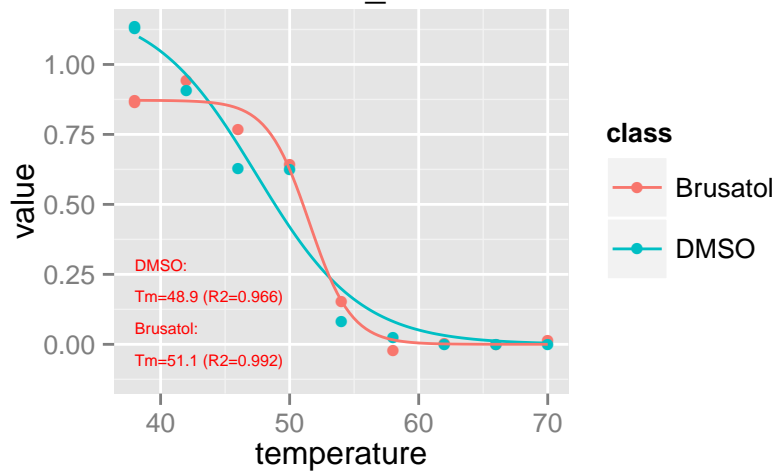

Prot: AKA12\_HUMAN

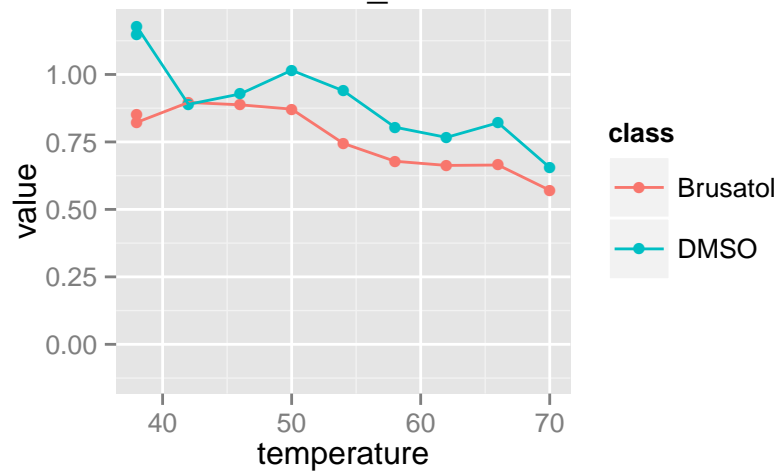

Prot: AKAP8\_HUMAN

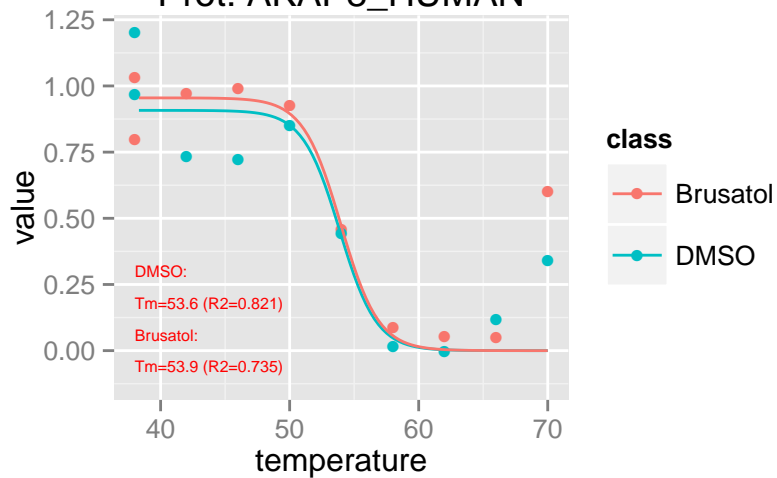

Prot: AKAP9\_HUMAN

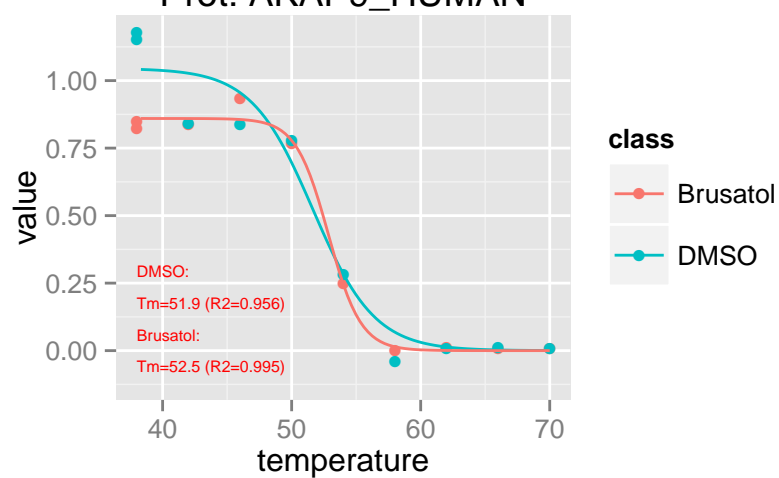

Prot: AKP13\_HUMAN

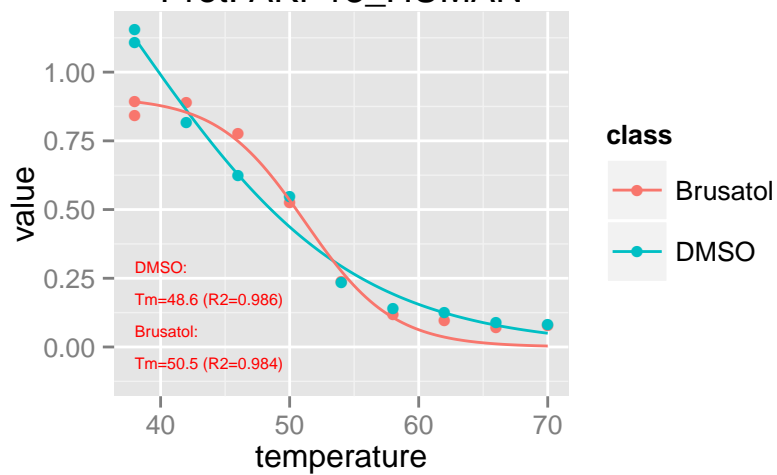

Prot: AKT1\_HUMAN

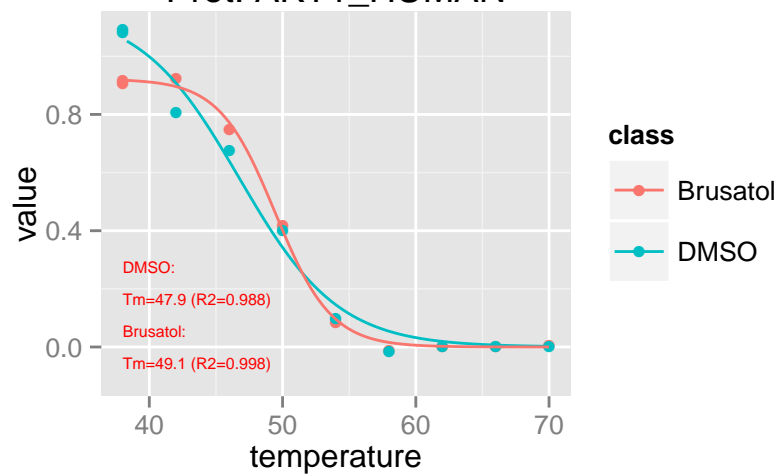

Prot: AKT2\_HUMAN

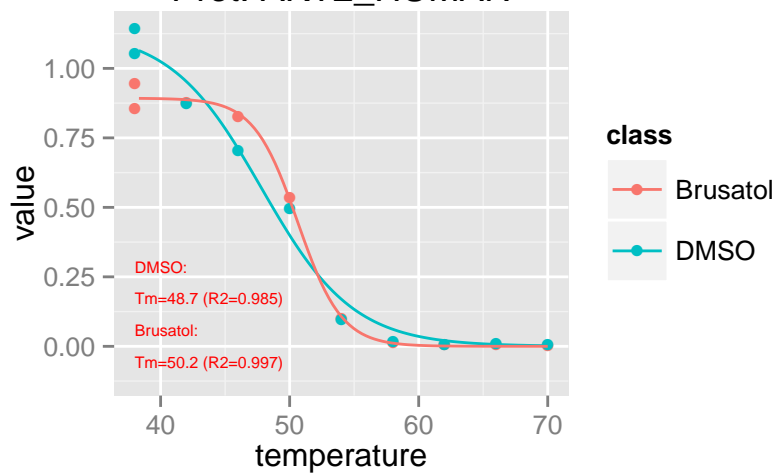

Prot: AKTS1\_HUMAN

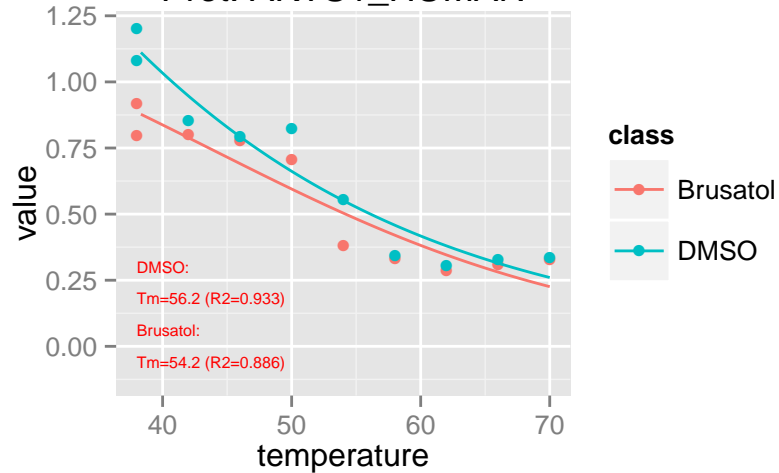

Prot: AL1A1\_HUMAN

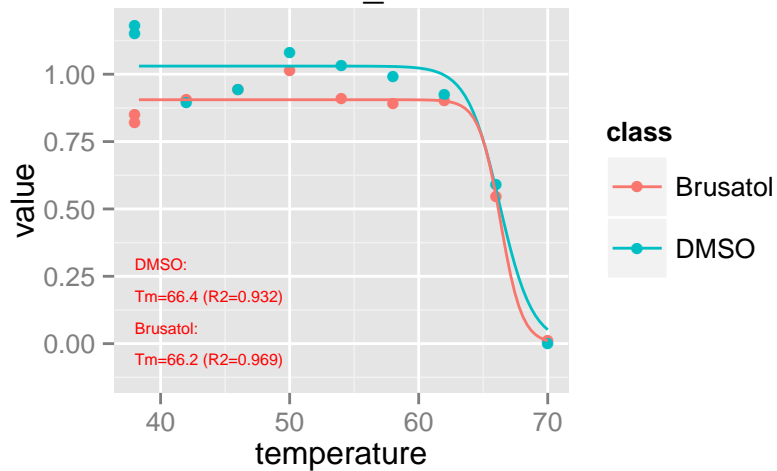

Prot: AL1A2\_HUMAN

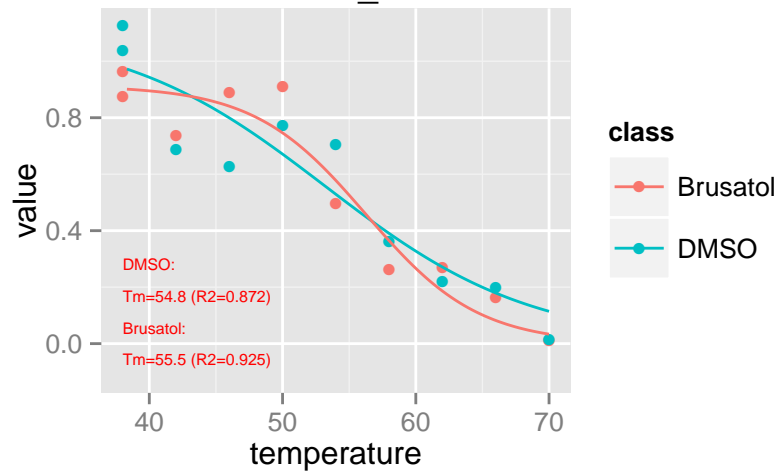

Prot: AL1A3\_HUMAN

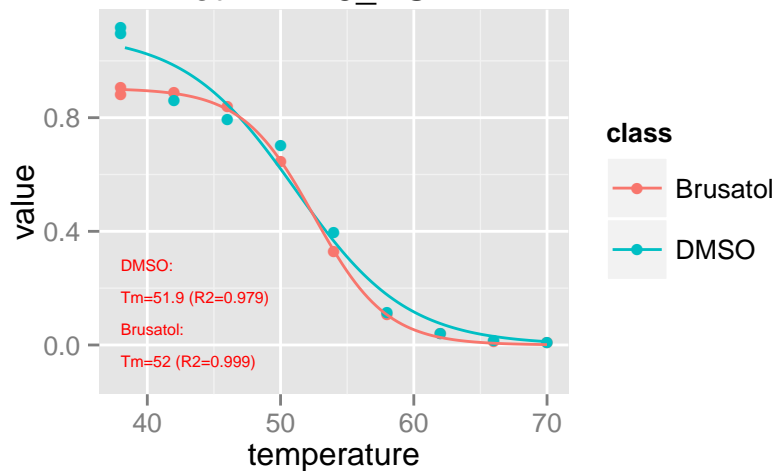

Prot: AL1B1\_HUMAN

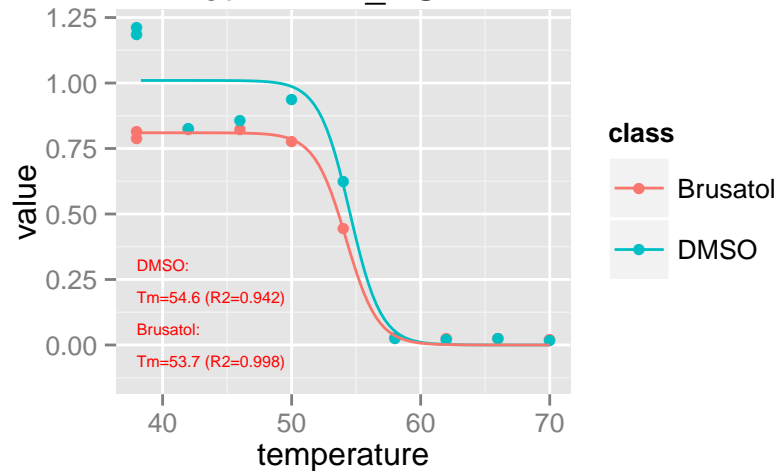

Prot: AL3A1\_HUMAN

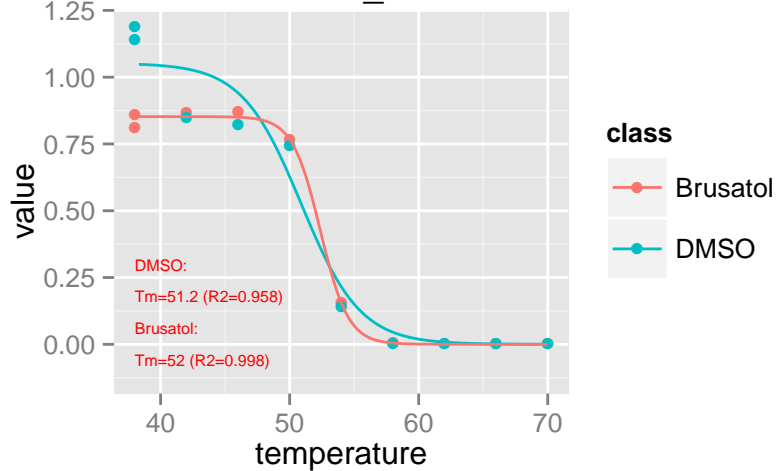

Prot: AL3A2\_HUMAN

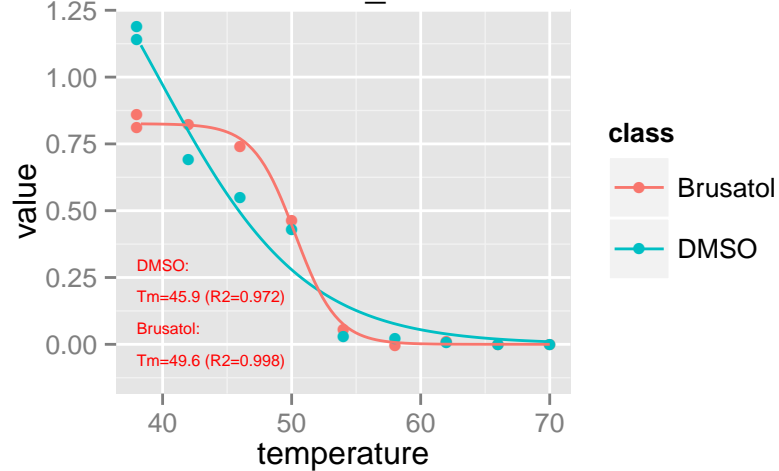

Prot: AL4A1\_HUMAN

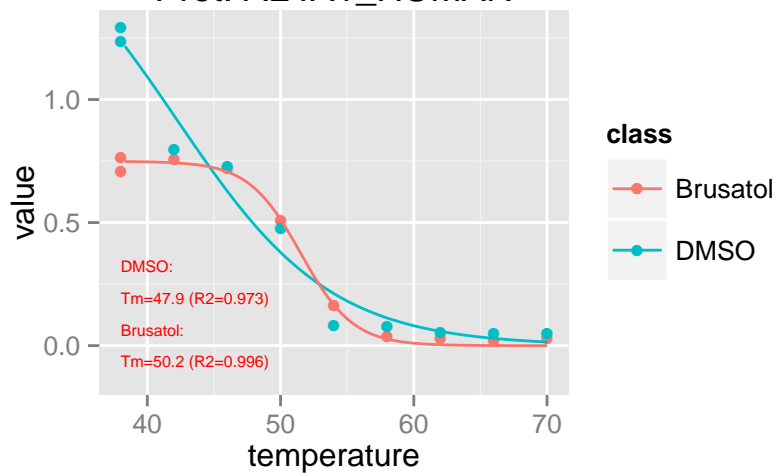

Prot: AL7A1\_HUMAN

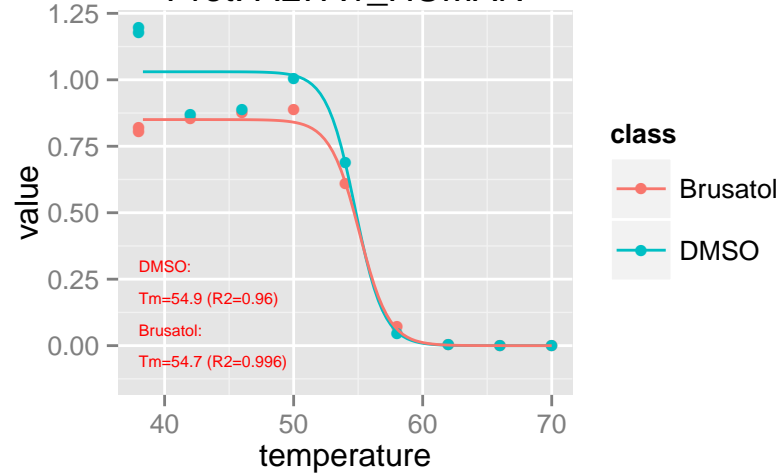

Prot: AL9A1\_HUMAN

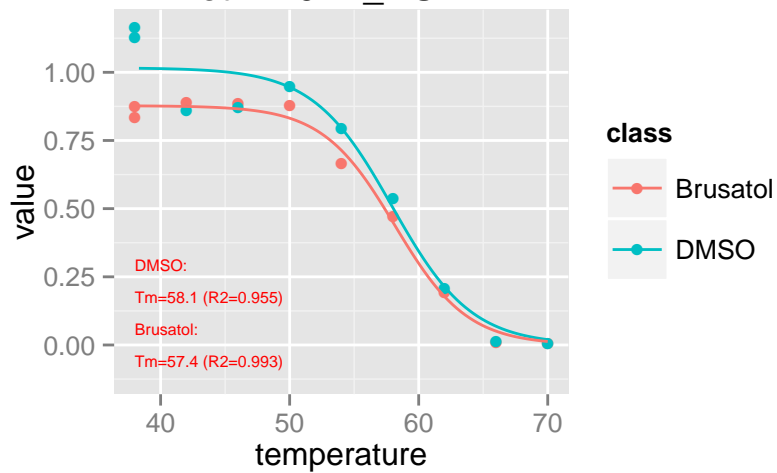

Prot: ALBU\_HUMAN

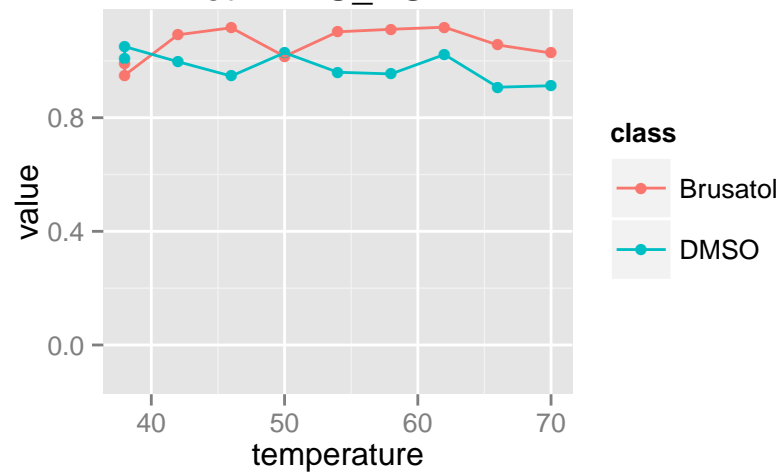

Prot: ALDH2\_HUMAN

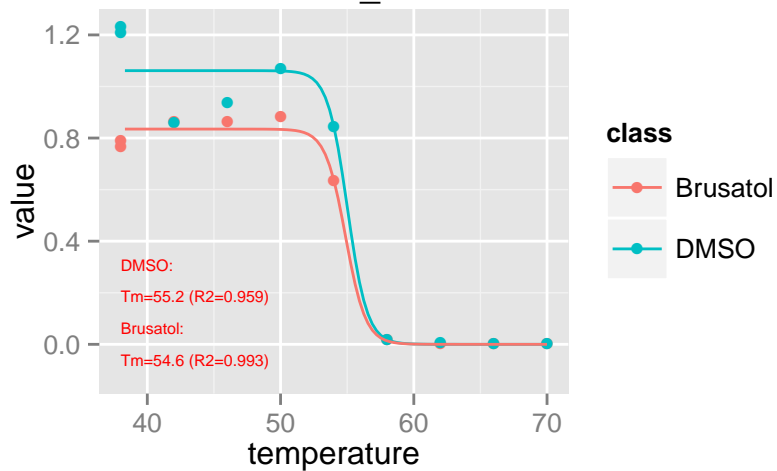

Prot: ALDOA\_HUMAN

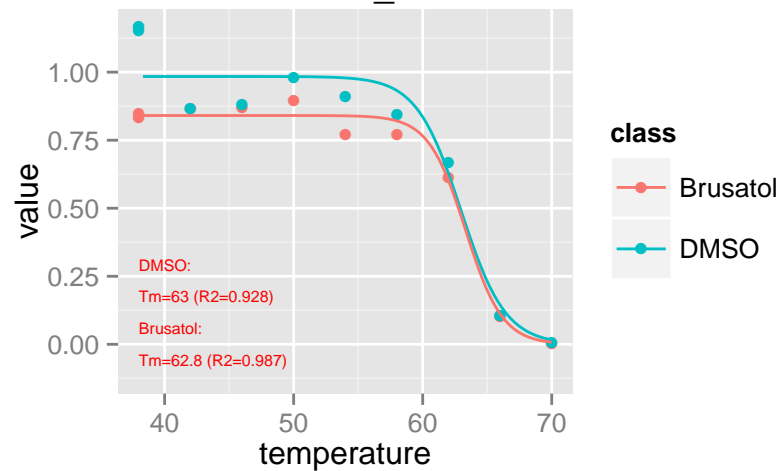



Prot: ALDOC\_HUMAN

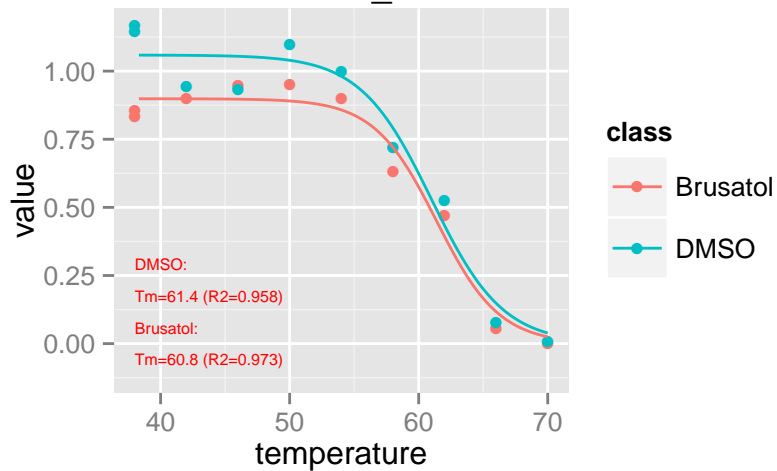

Prot: ALDR\_HUMAN

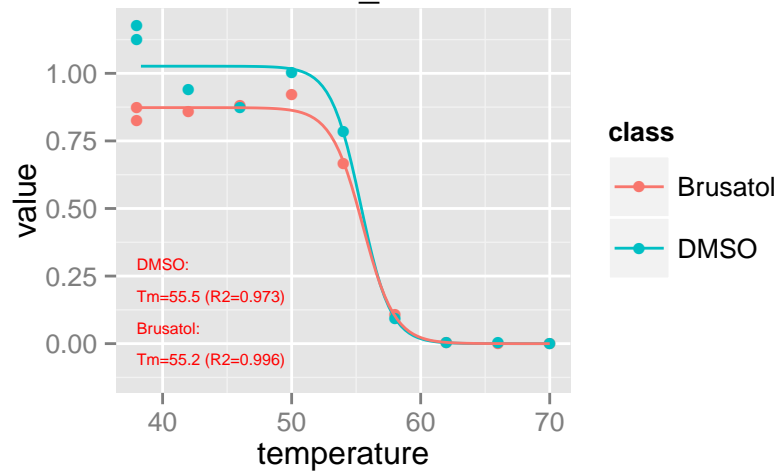

Prot: ALKB5\_HUMAN

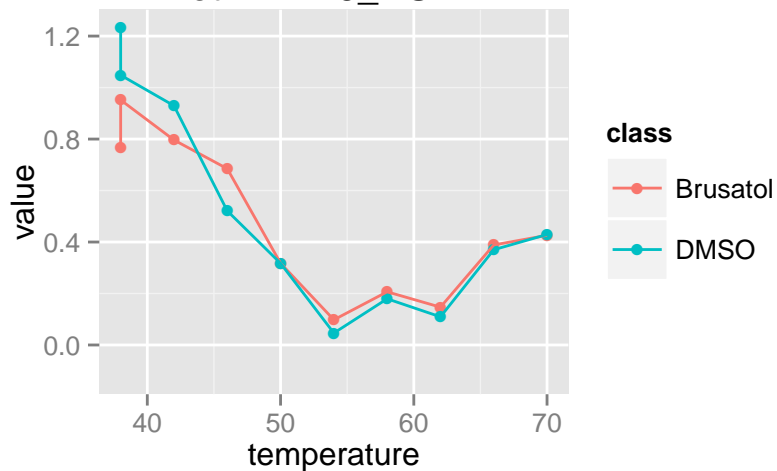

Prot: ALO17\_HUMAN

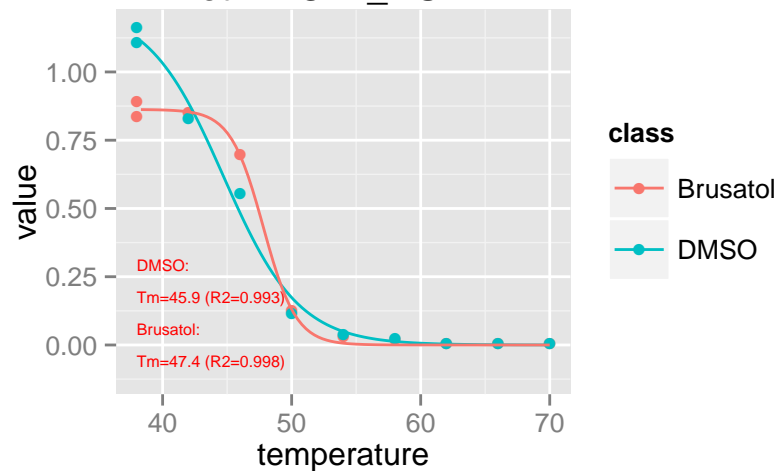

Prot: ALR\_HUMAN

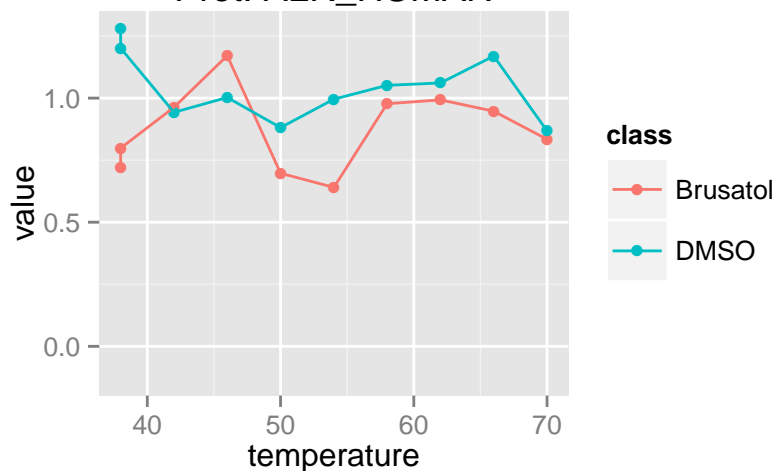

Prot: AMPB\_HUMAN

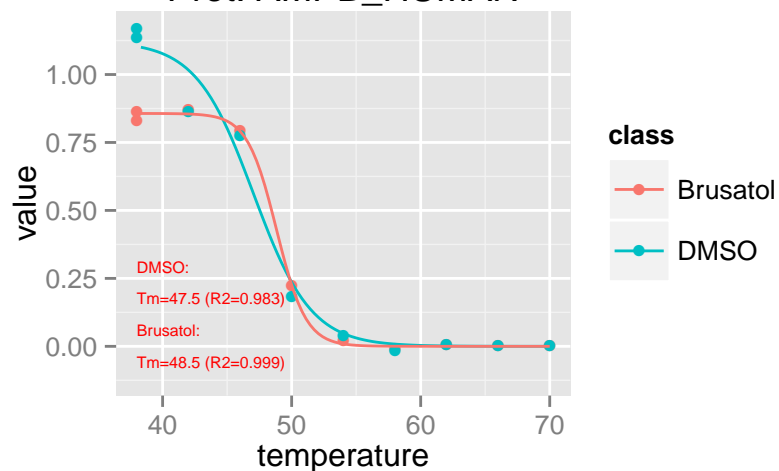

Prot: AMPD2\_HUMAN

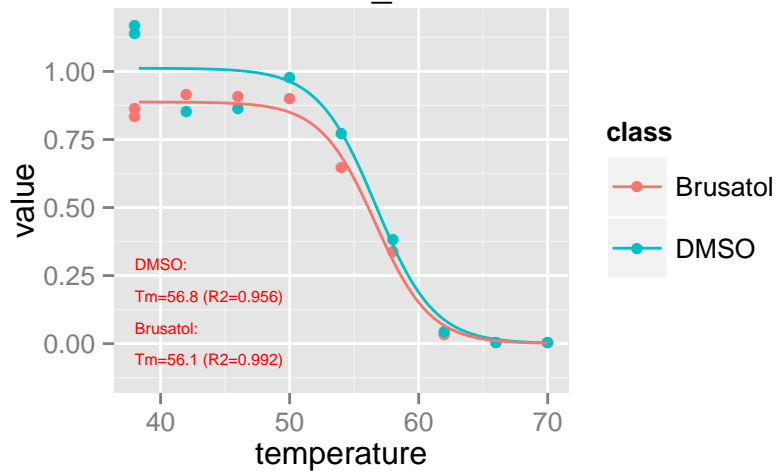

Prot: AMPL\_HUMAN

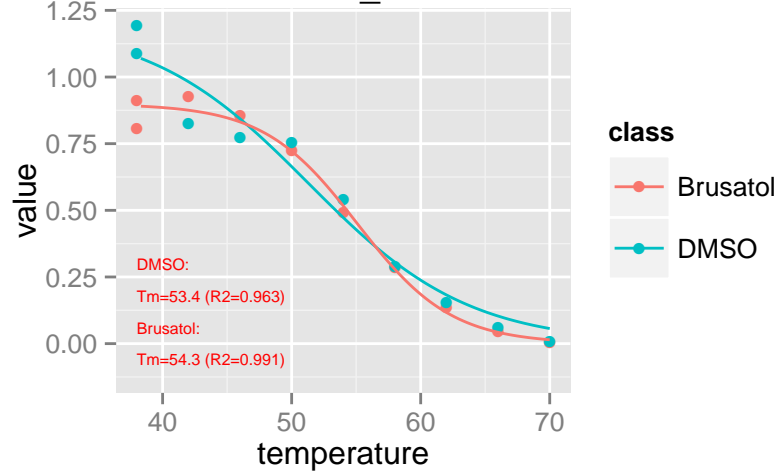

Prot: AMPM1\_HUMAN

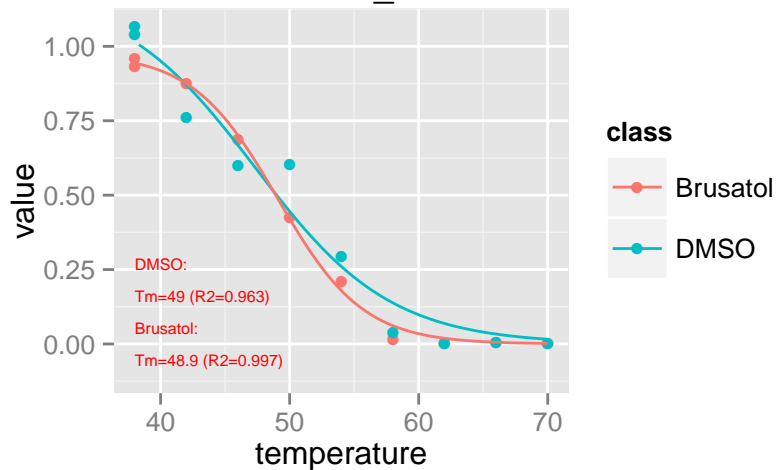

Prot: AMPM2\_HUMAN

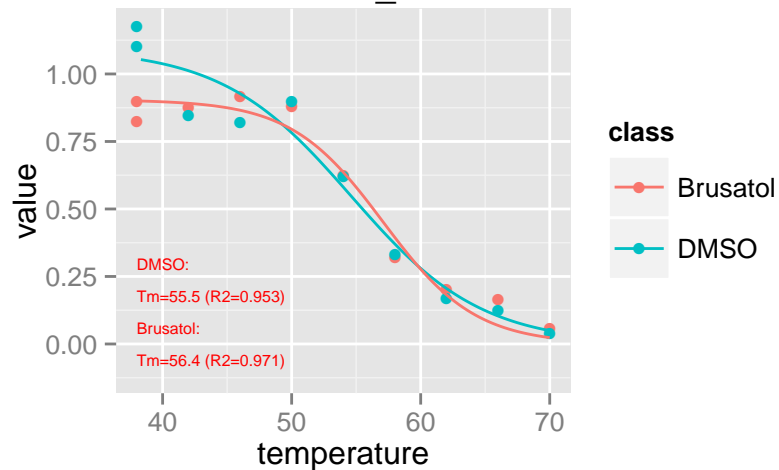

Prot: AMRP\_HUMAN

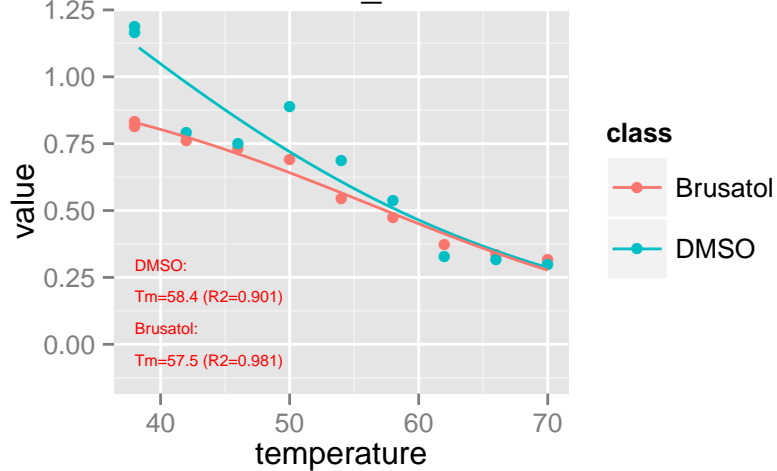

Prot: AN32A\_HUMAN

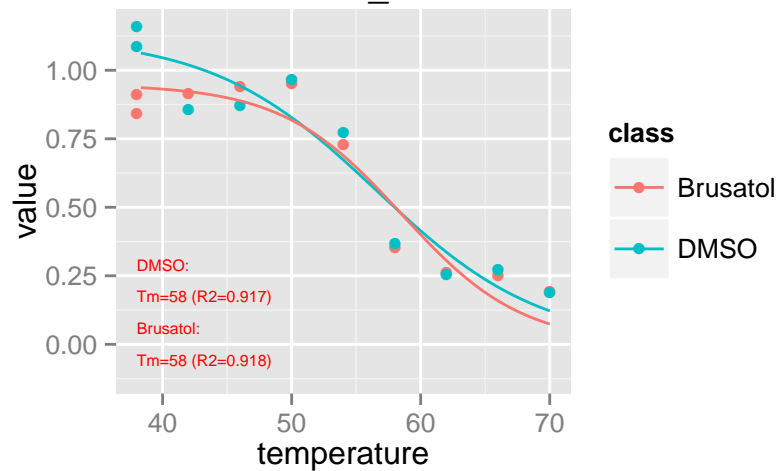

Prot: AN32B\_HUMAN

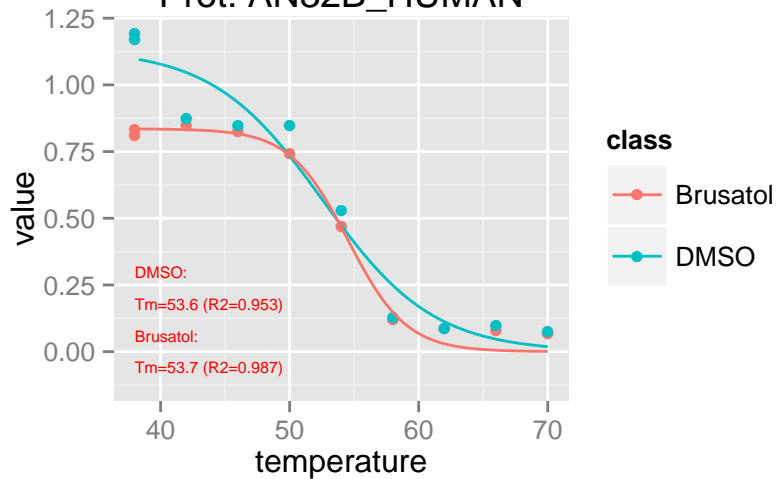

Prot: AN32E\_HUMAN

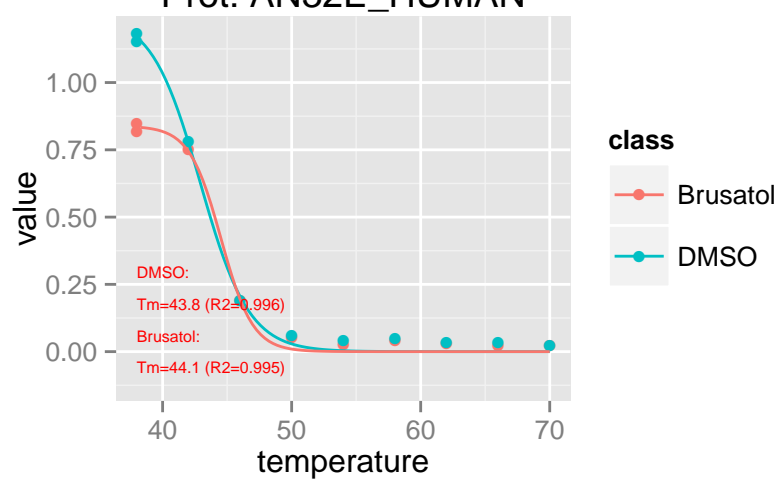

Prot: ANFY1\_HUMAN

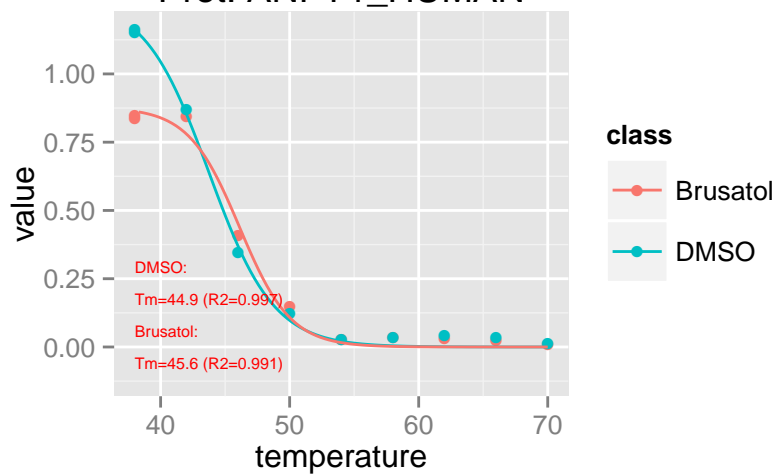

Prot: ANKH1\_HUMAN

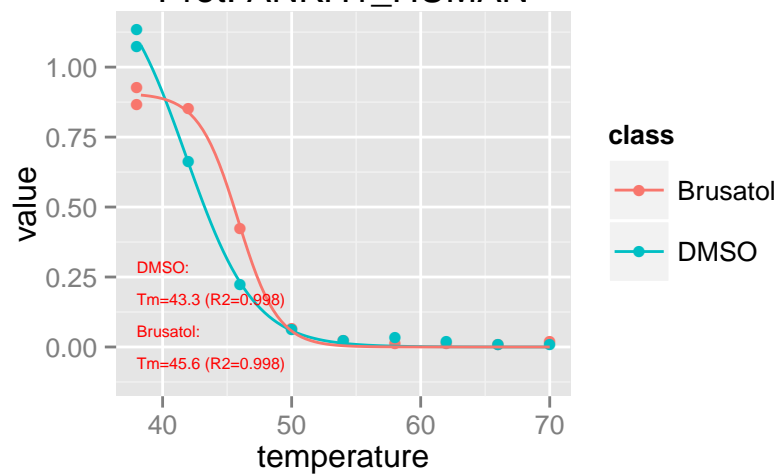

Prot: ANLN\_HUMAN

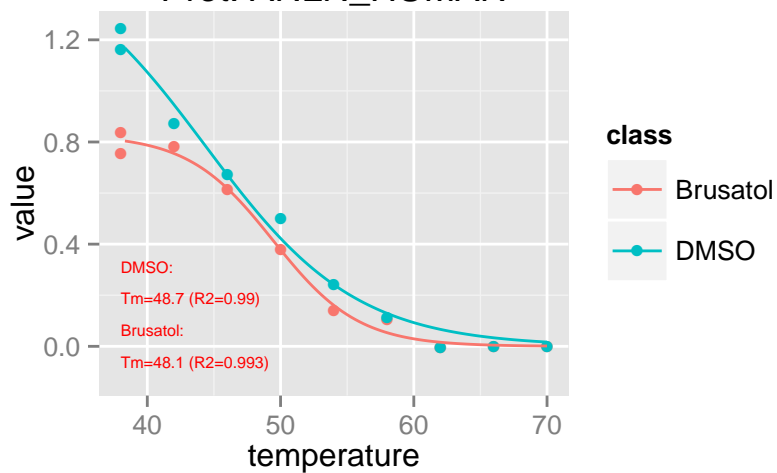

Prot: ANM1\_HUMAN

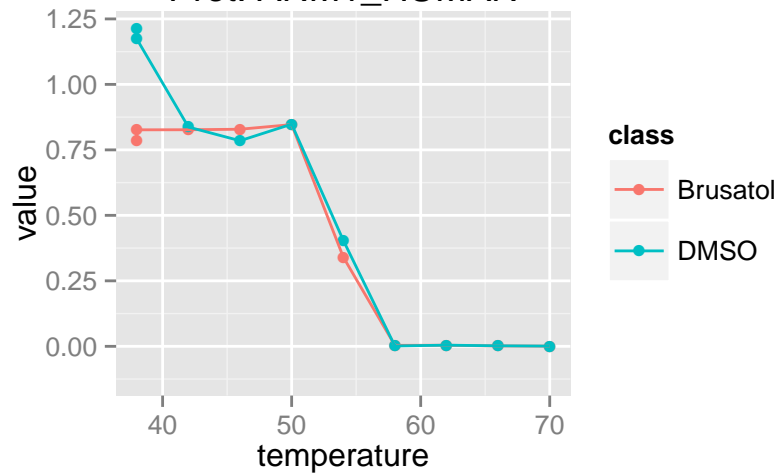

Prot: ANM3\_HUMAN

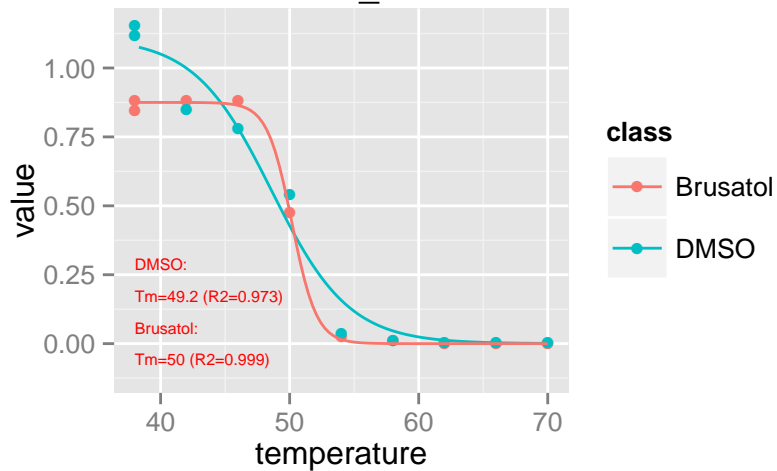

Prot: ANM5\_HUMAN

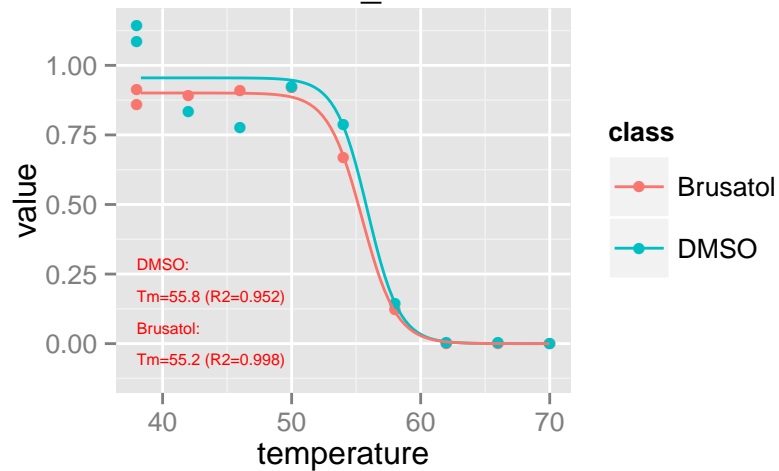

Prot: ANR16\_HUMAN

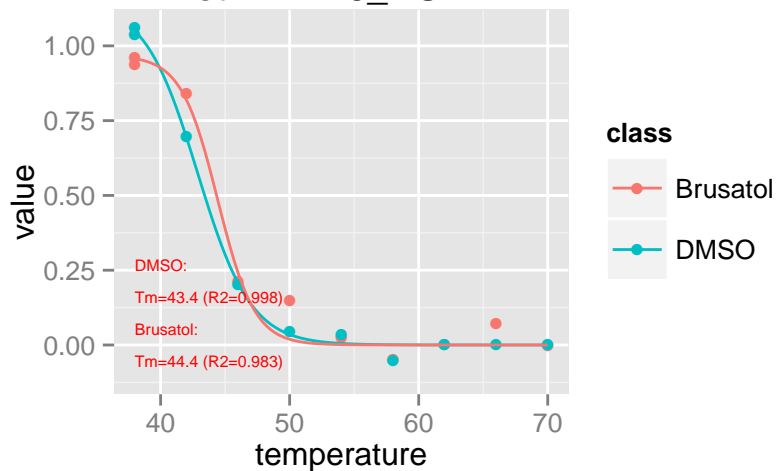

Prot: ANR17\_HUMAN

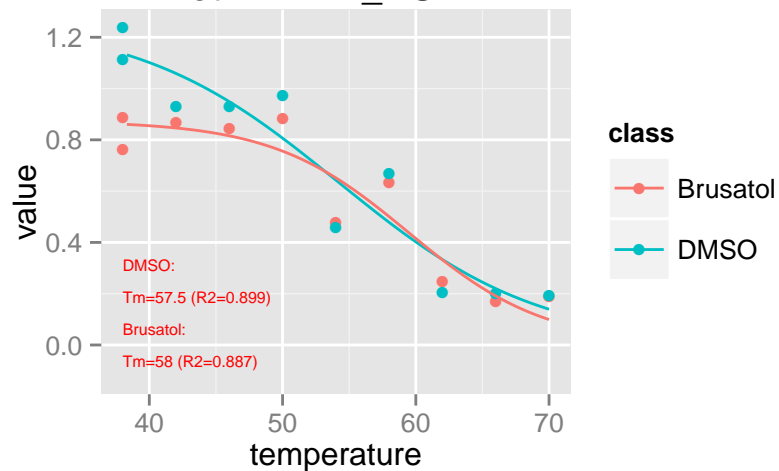

Prot: ANR28\_HUMAN

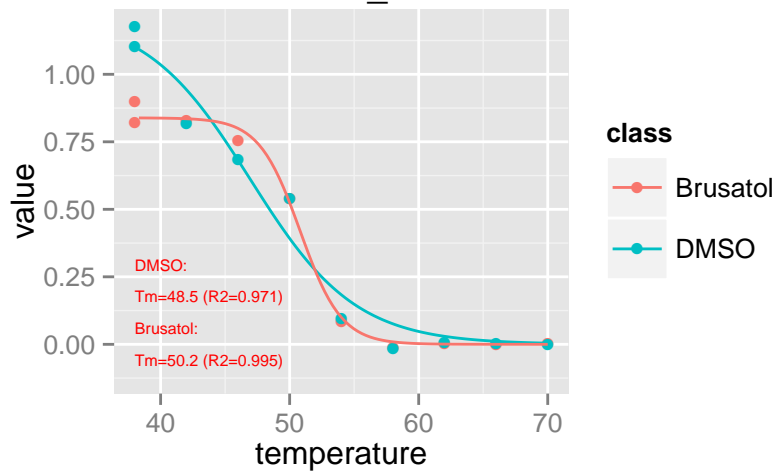

Prot: ANR52\_HUMAN

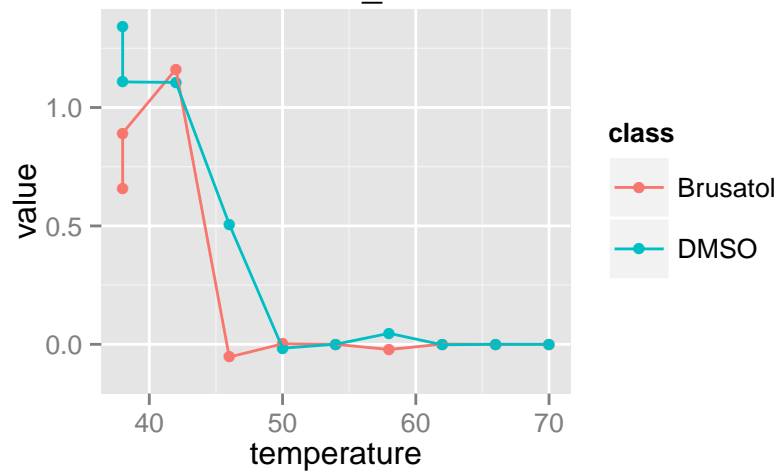

Prot: ANR54\_HUMAN

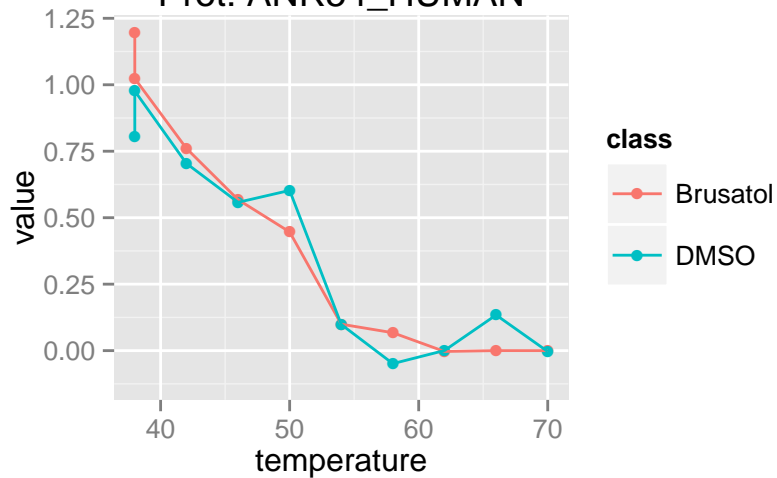

Prot: ANX11\_HUMAN

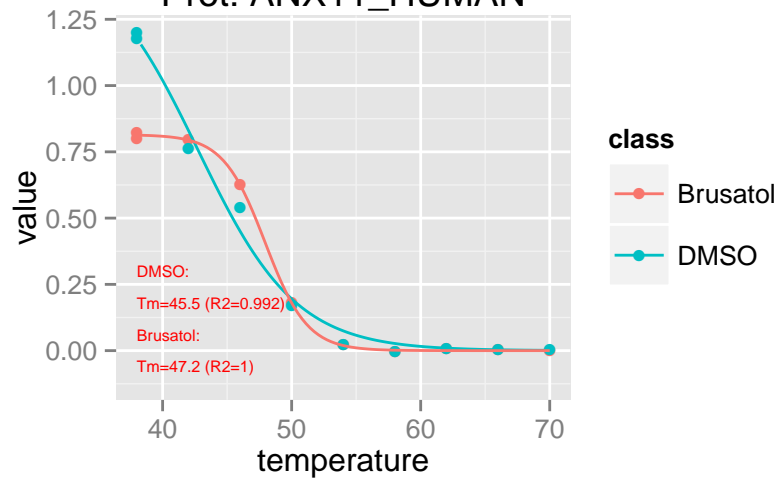

Prot: ANXA1\_HUMAN

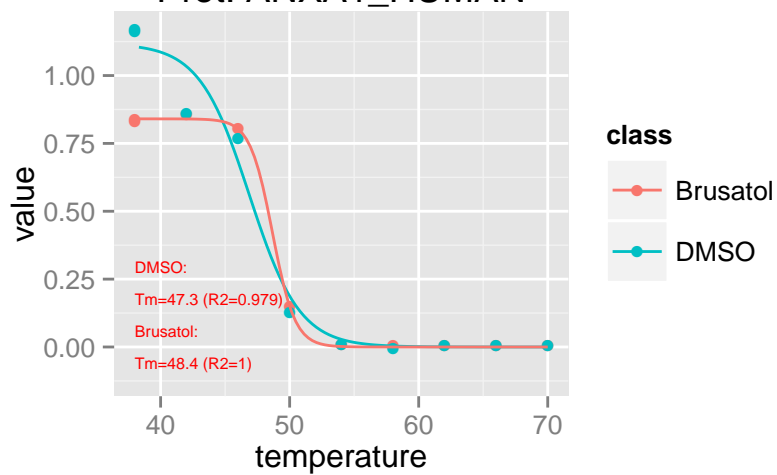

Prot: ANXA2\_HUMAN

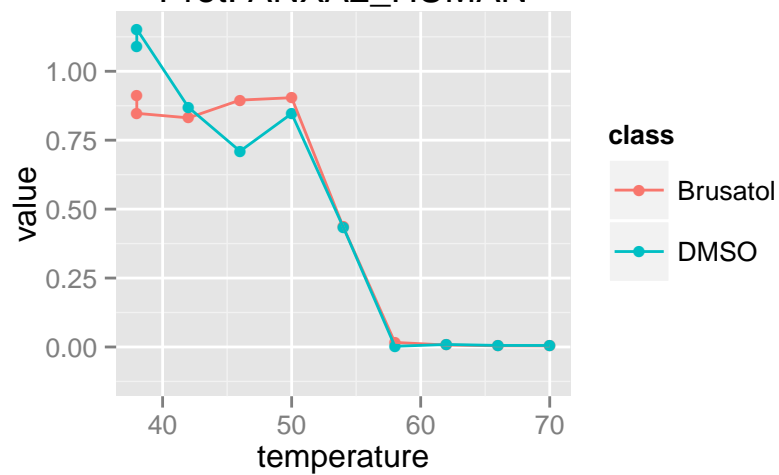

Prot: ANXA3\_HUMAN

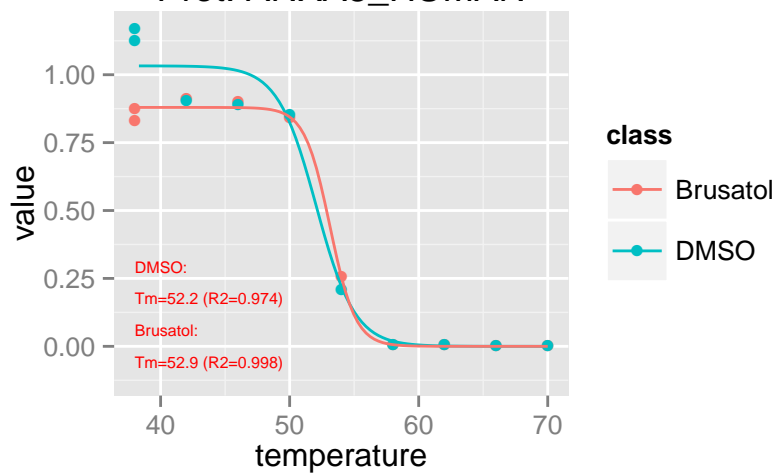

Prot: ANXA4\_HUMAN

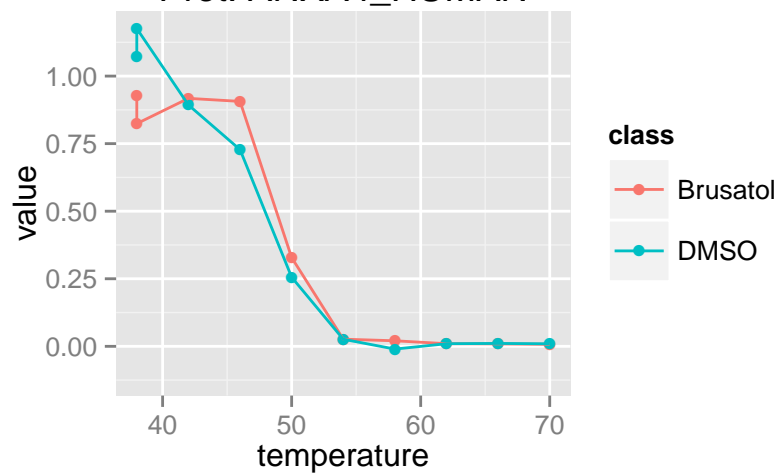

Prot: ANXA5\_HUMAN

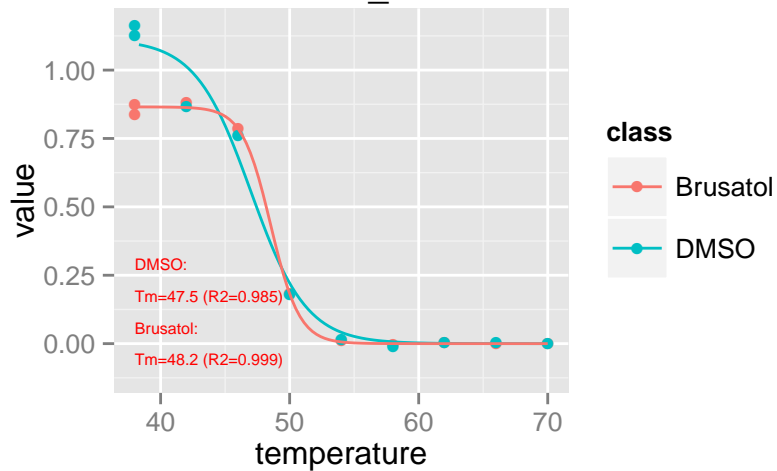

Prot: ANXA6\_HUMAN

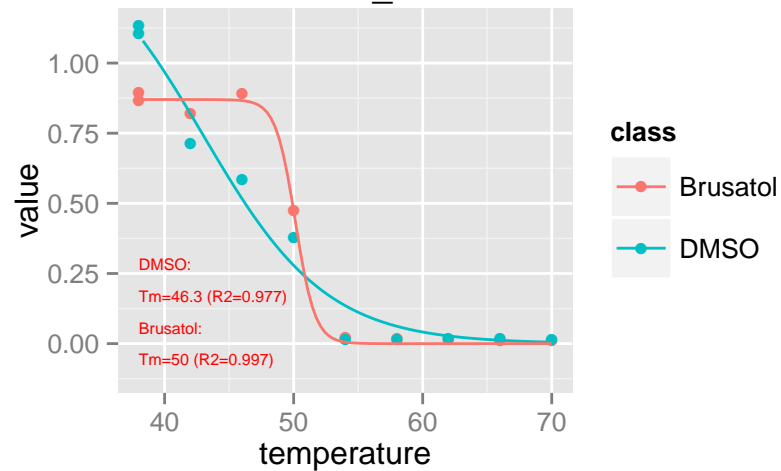

Prot: ANXA7\_HUMAN

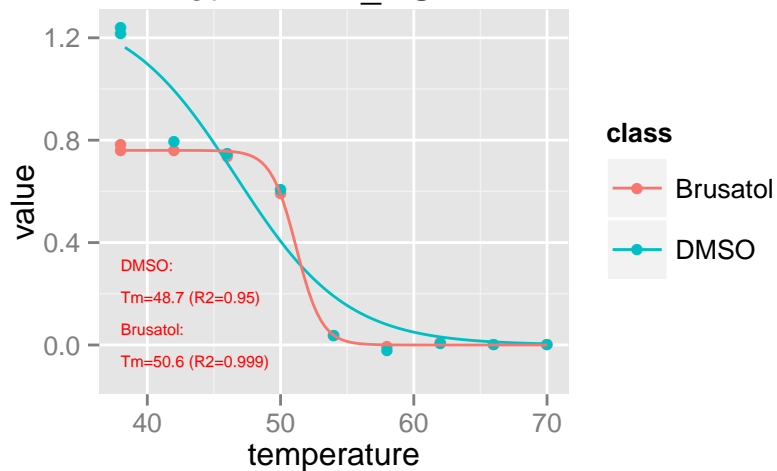

Prot: ANXA8\_HUMAN

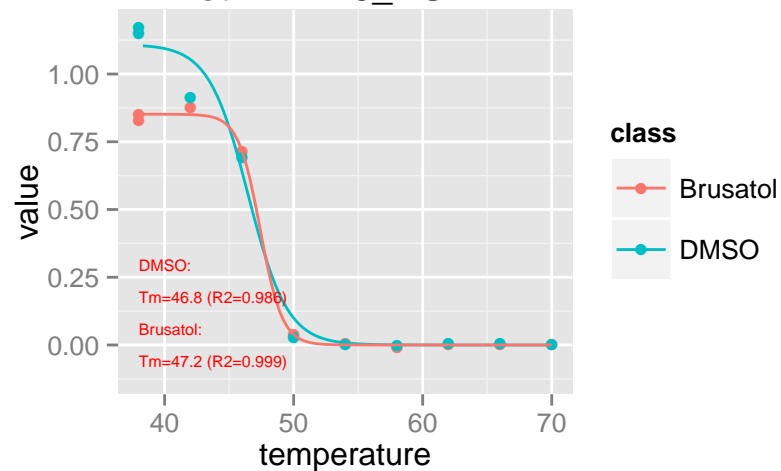

Prot: AP180\_HUMAN

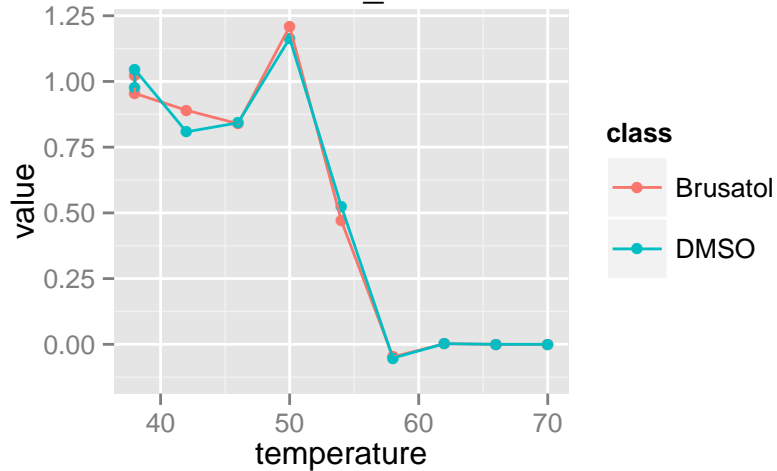

Prot: AP1B1\_HUMAN

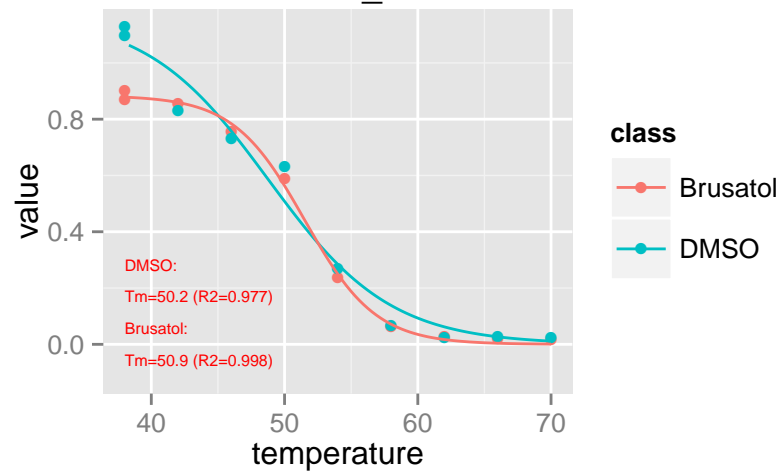

Prot: AP1G1\_HUMAN

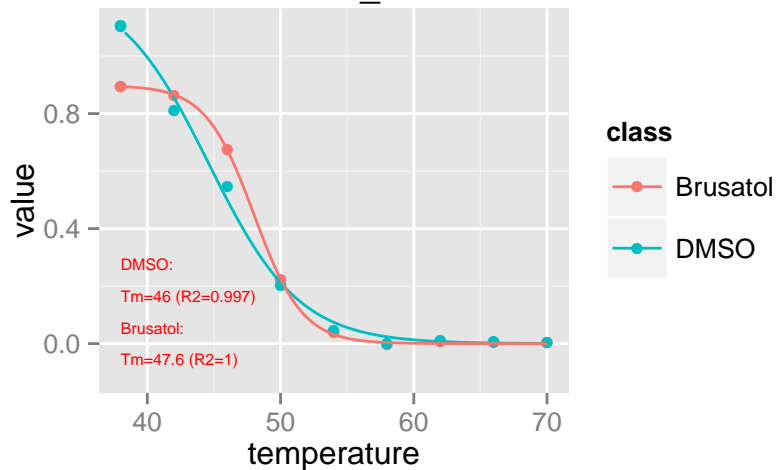

Prot: AP1G2\_HUMAN

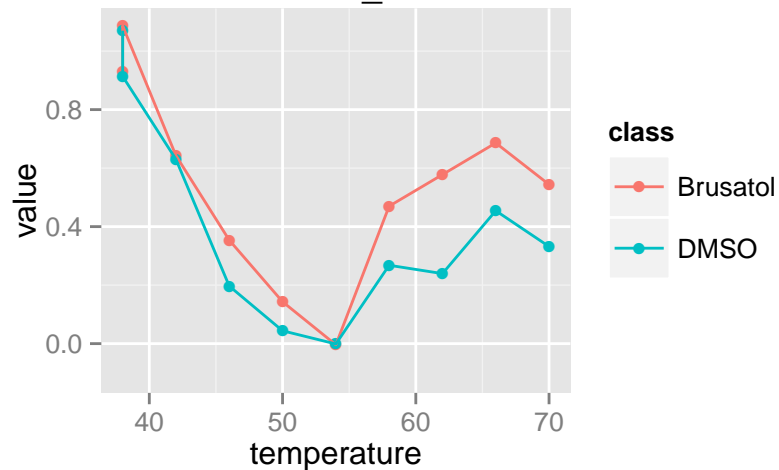

Prot: AP1M1\_HUMAN

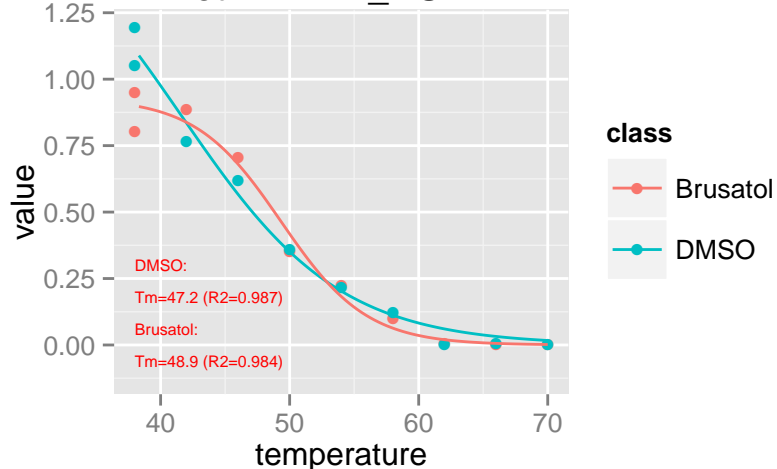

Prot: AP1S1\_HUMAN

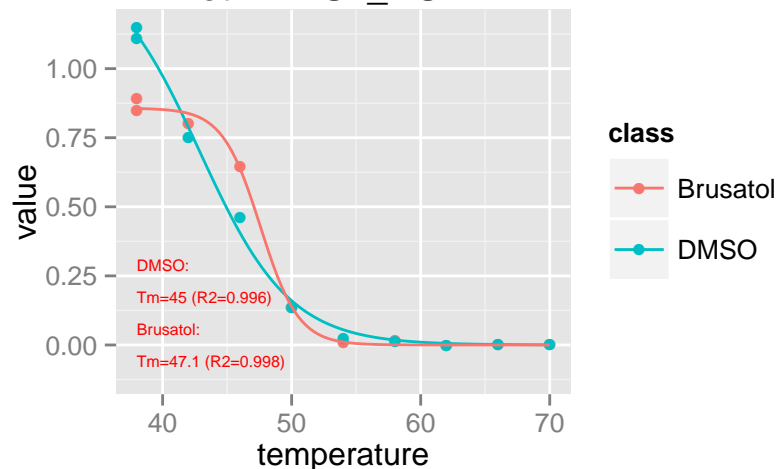

Prot: AP2A1\_HUMAN

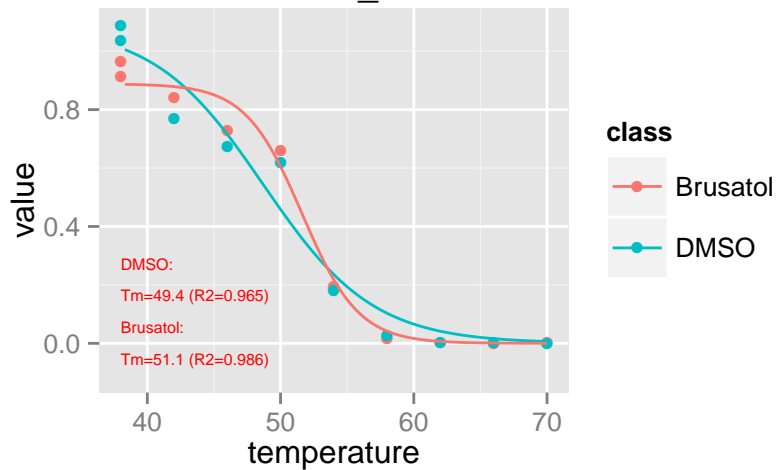

Prot: AP2A2\_HUMAN

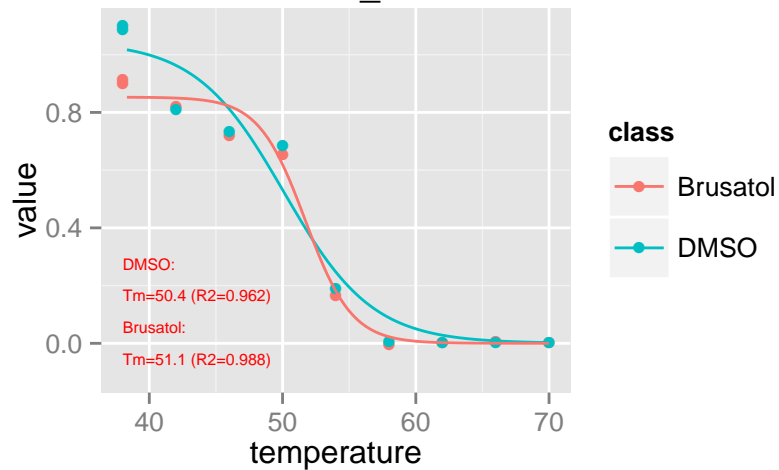

Prot: AP2B1\_HUMAN

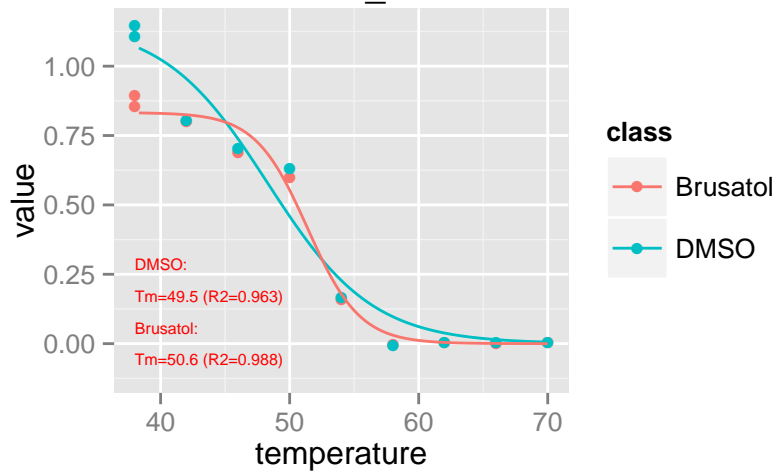

Prot: AP2M1\_HUMAN

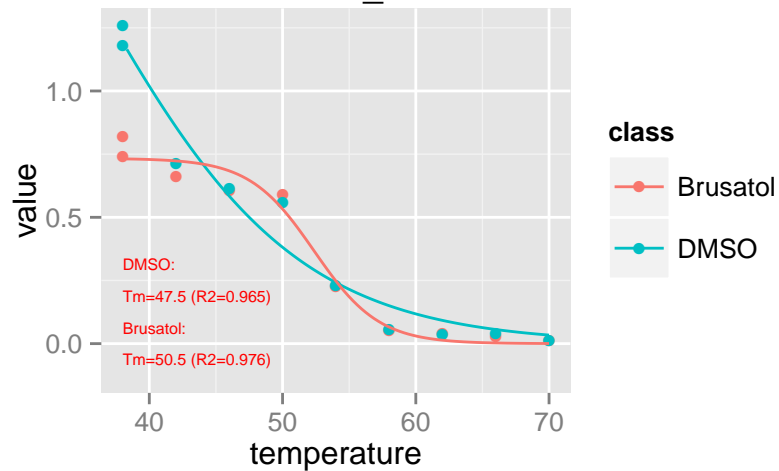

Prot: AP2S1\_HUMAN

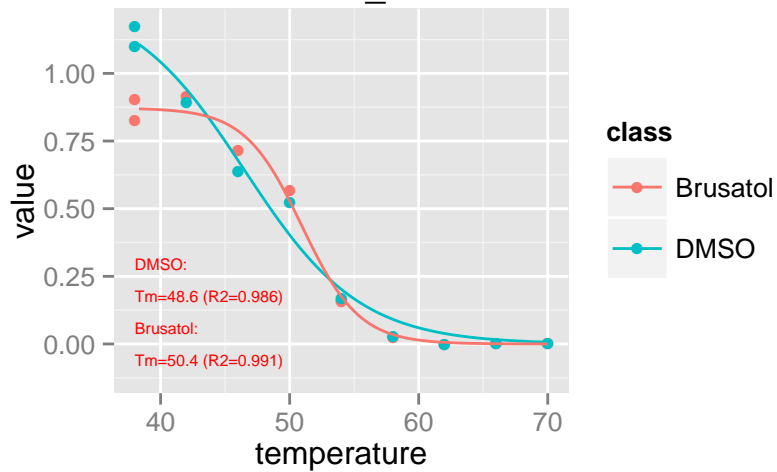

Prot: AP3B1\_HUMAN

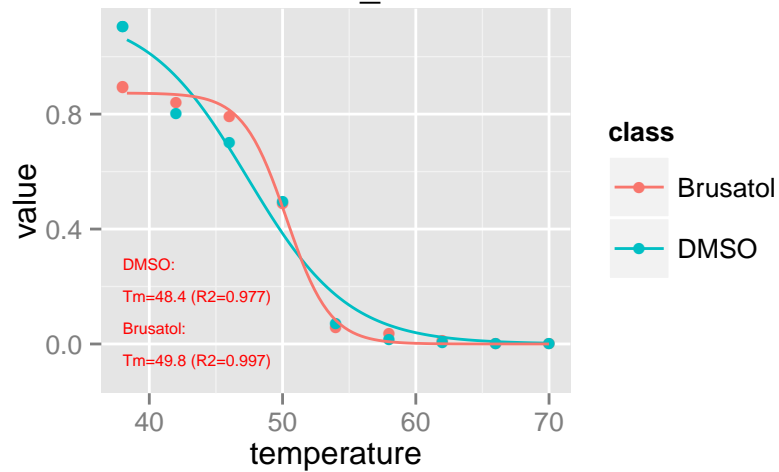

Prot: AP3D1\_HUMAN

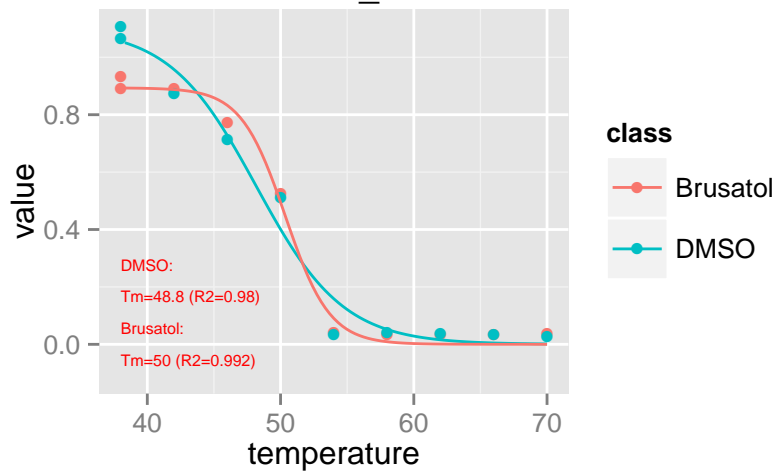

Prot: AP3M1\_HUMAN

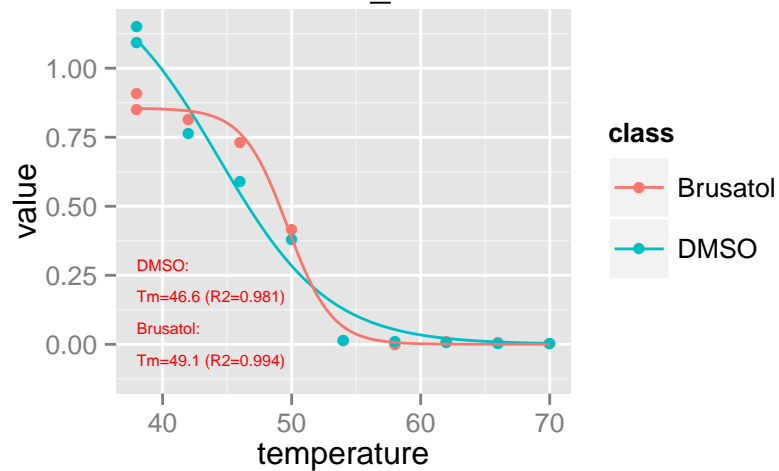



Prot: AP3S1\_HUMAN

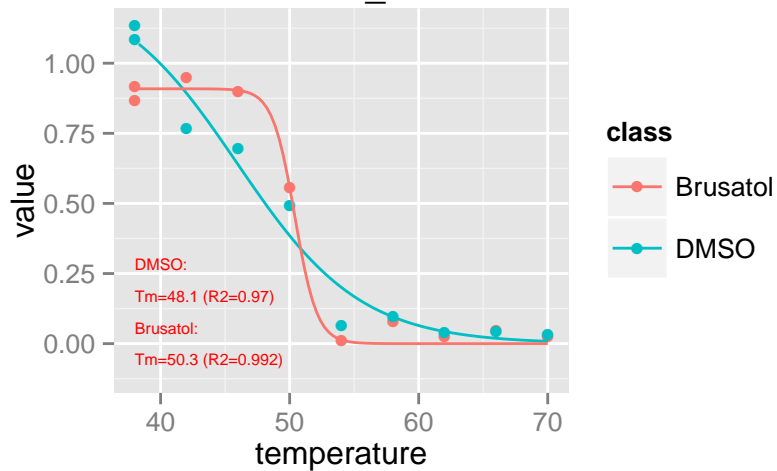

Prot: AP4S1\_HUMAN

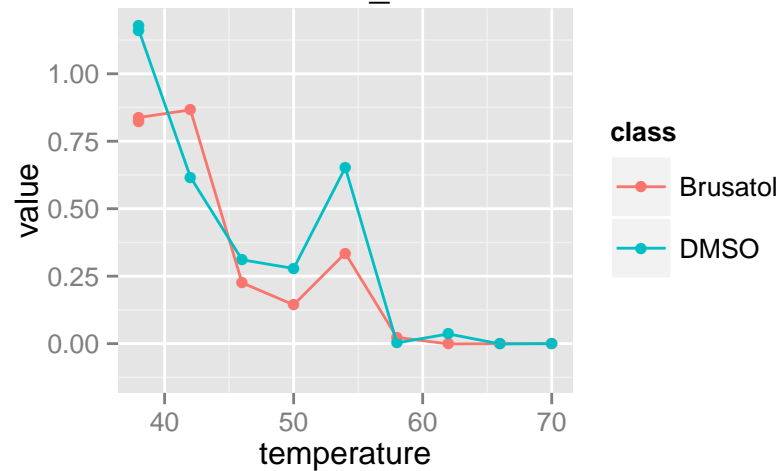

Prot: APC\_HUMAN

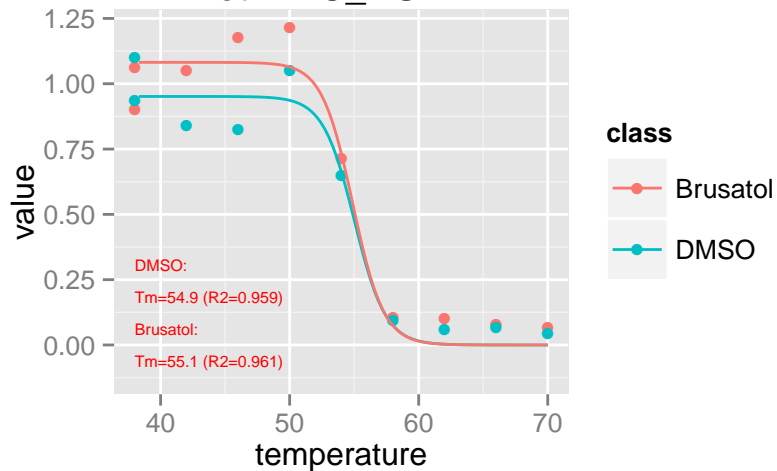

Prot: APC1\_HUMAN

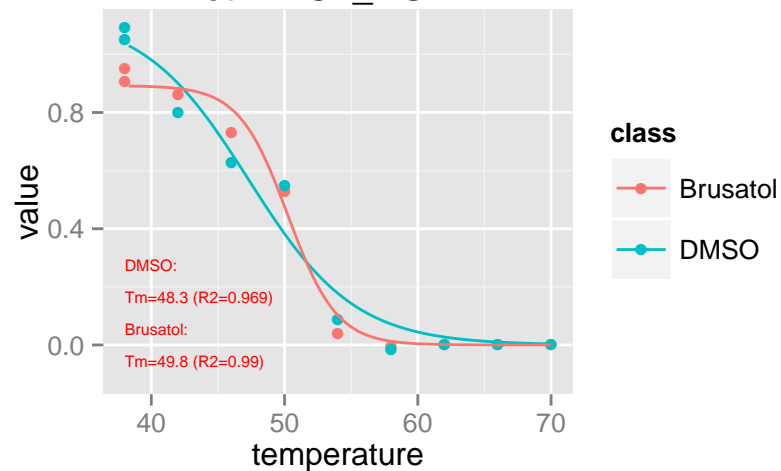

Prot: APC16\_HUMAN

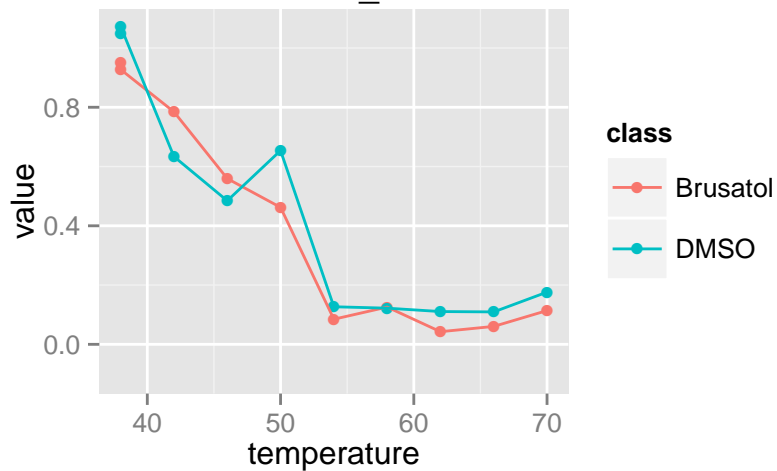

Prot: APC4\_HUMAN

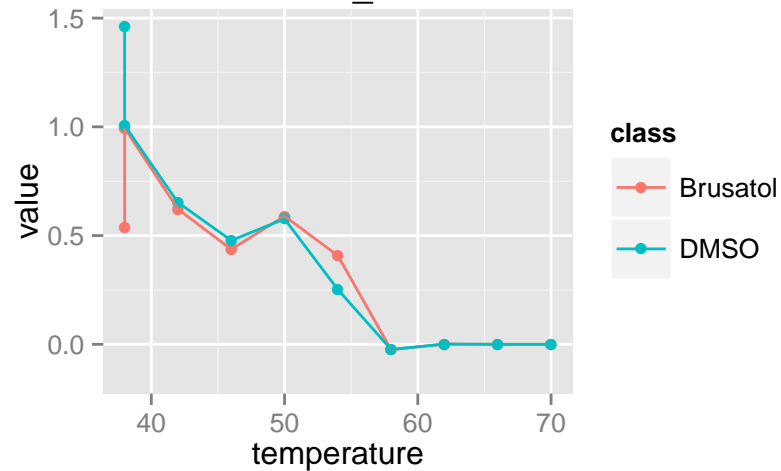

Prot: APC5\_HUMAN

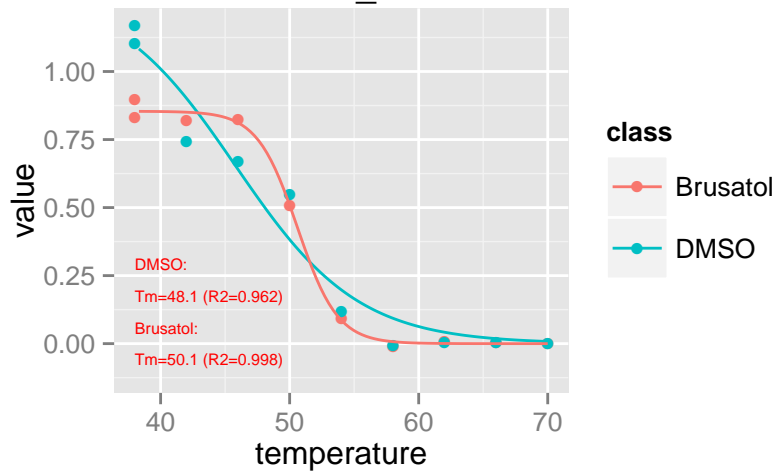

Prot: APC7\_HUMAN

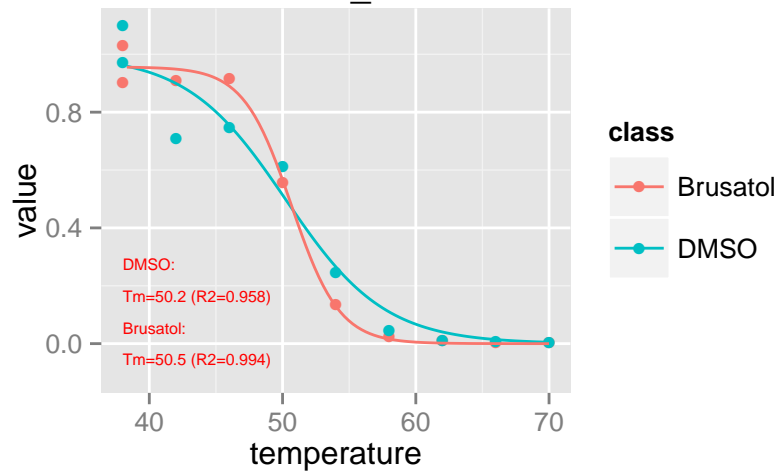

Prot: APEX1\_HUMAN

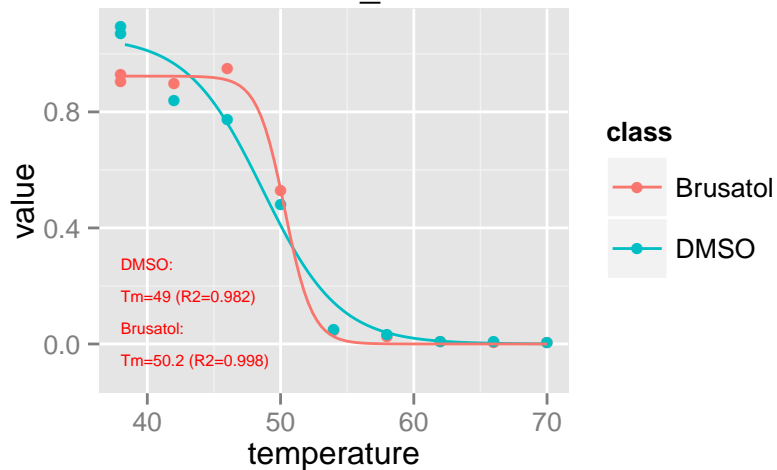

Prot: API5\_HUMAN

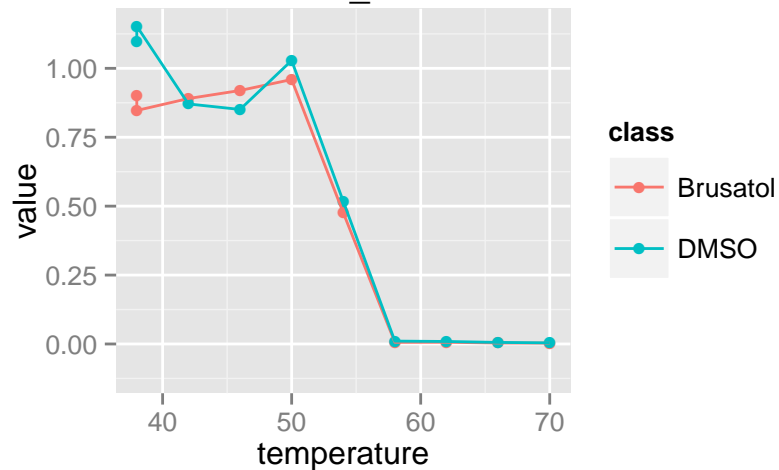

Prot: APOB\_HUMAN

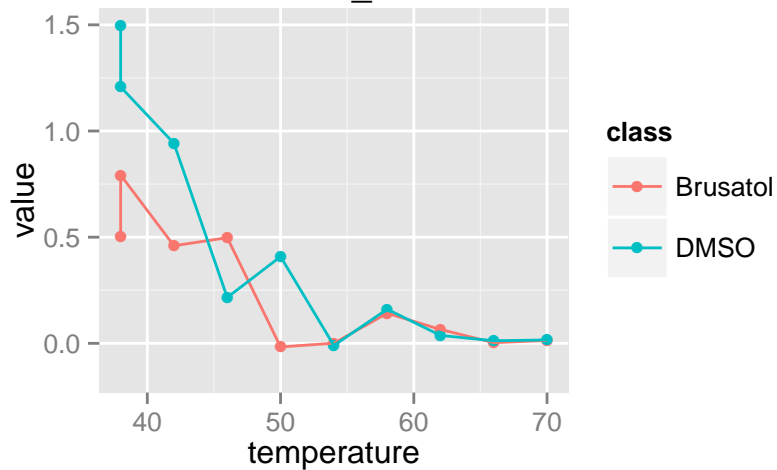

Prot: APT\_HUMAN

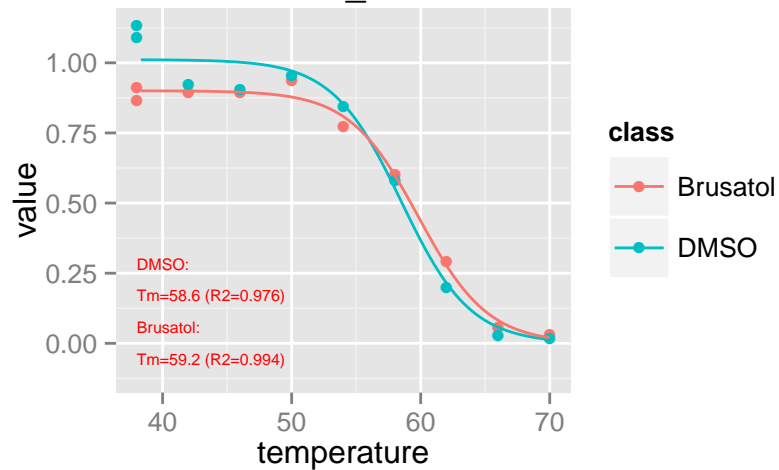

Prot: AR2BP\_HUMAN

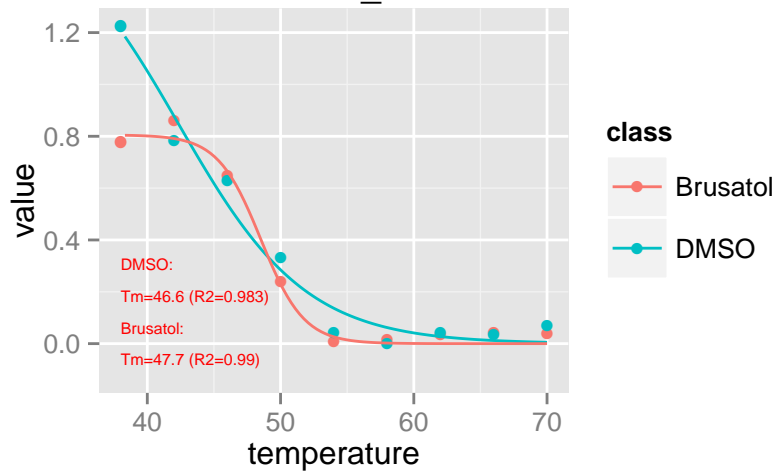

Prot: AR6P1\_HUMAN

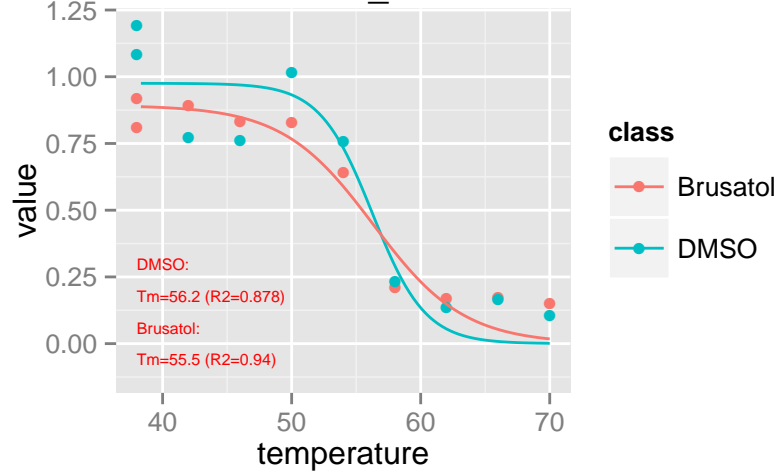

Prot: AR6P4\_HUMAN

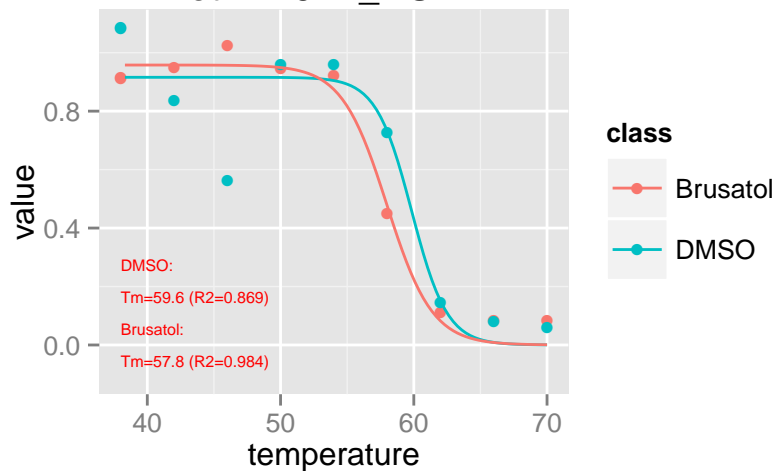

Prot: ARAF\_HUMAN

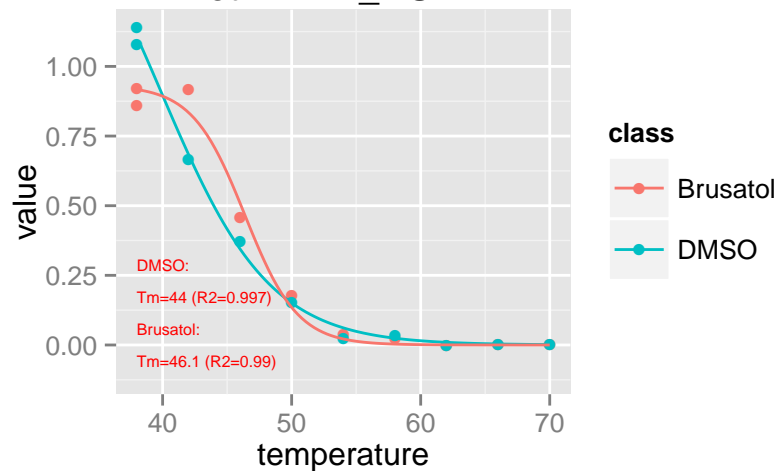

Prot: ARAP1\_HUMAN

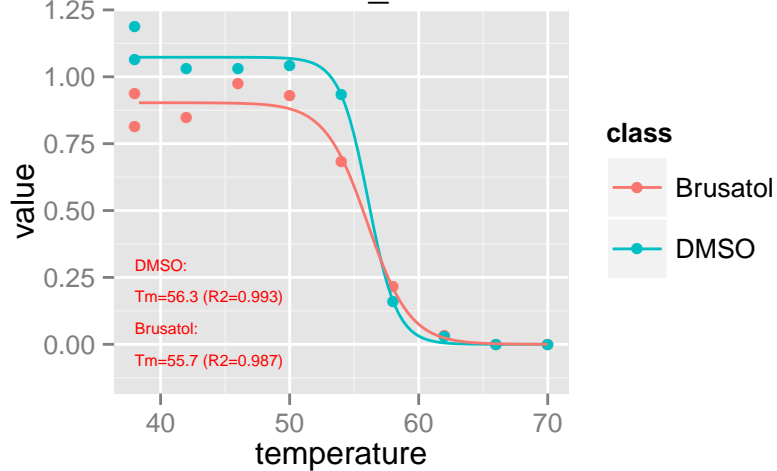

Prot: ARBK1\_HUMAN

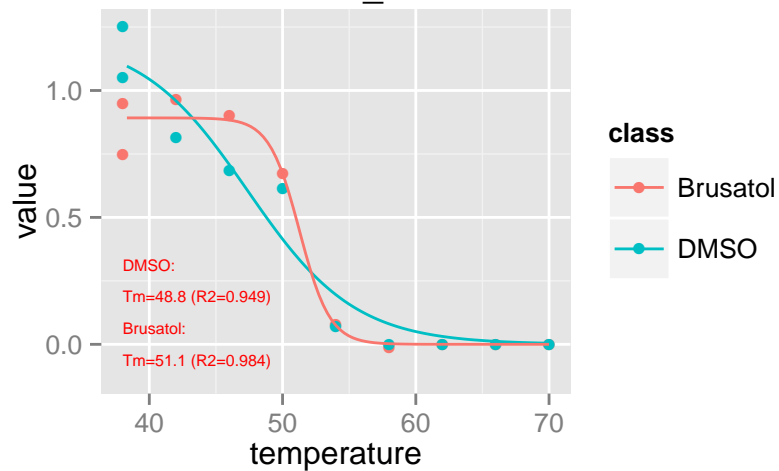

Prot: ARC1A\_HUMAN

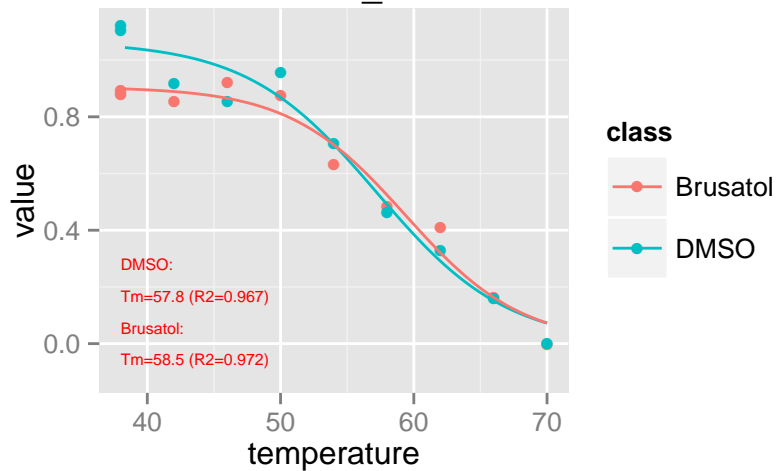

Prot: ARC1B\_HUMAN

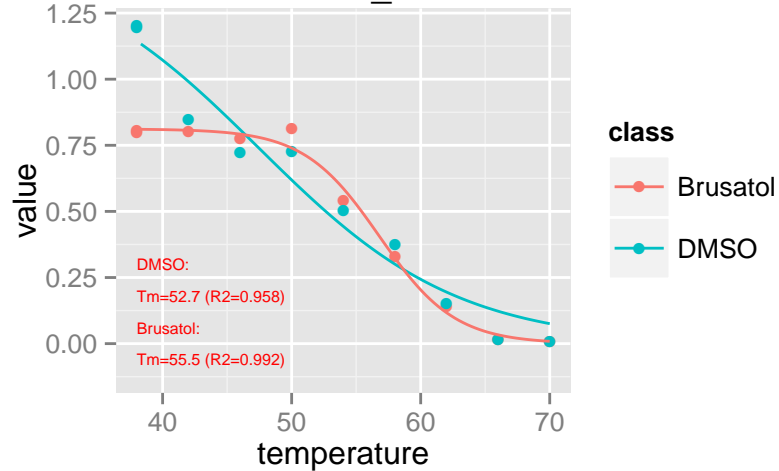

Prot: ARF1\_HUMAN

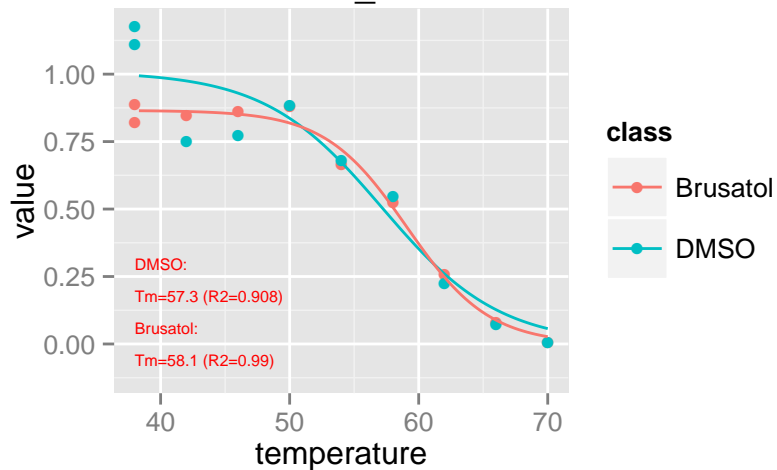

Prot: ARF4\_HUMAN

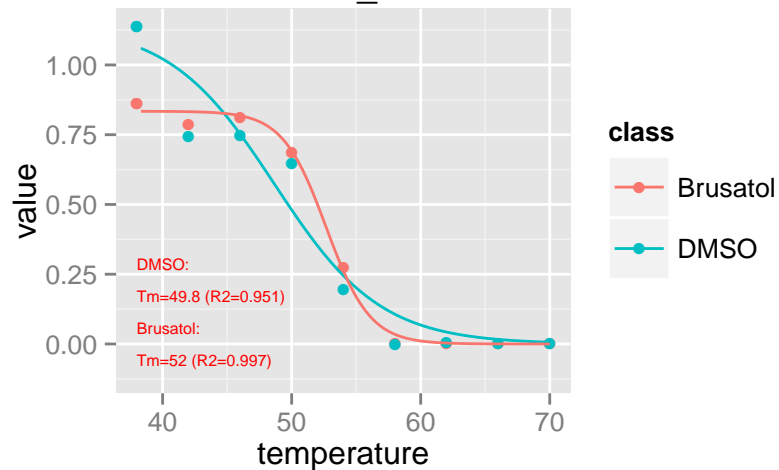

Prot: ARF5\_HUMAN

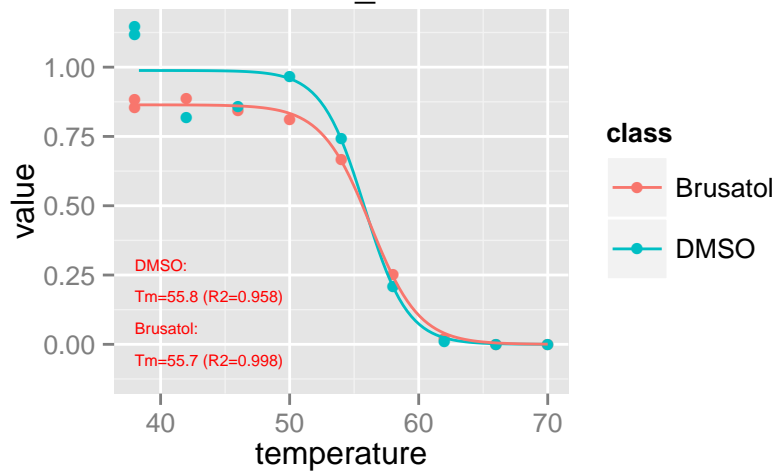

Prot: ARF6\_HUMAN

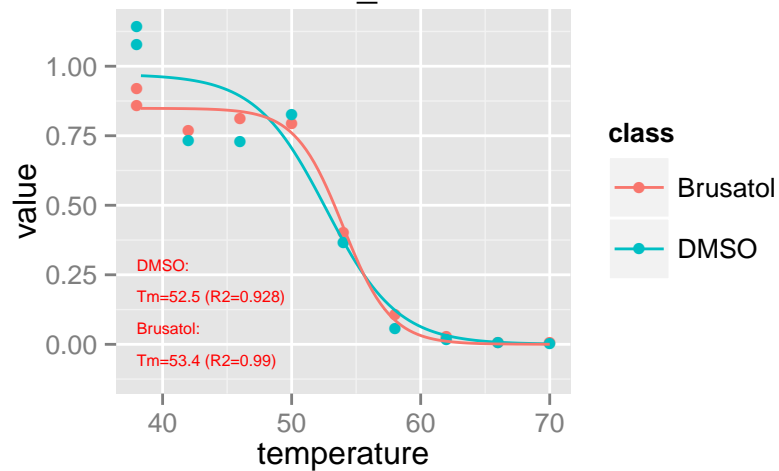

Prot: ARFG1\_HUMAN

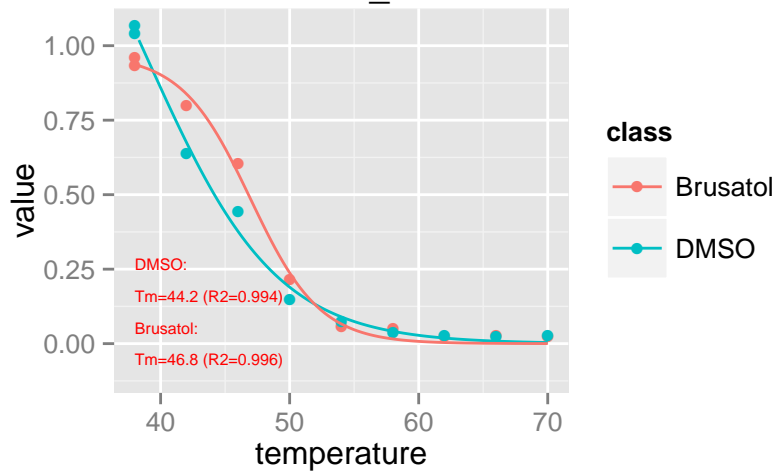

Prot: ARFG2\_HUMAN

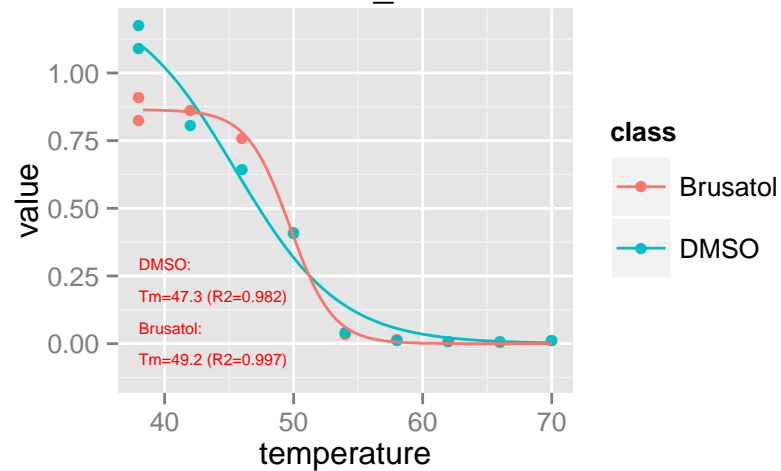

Prot: ARFG3\_HUMAN

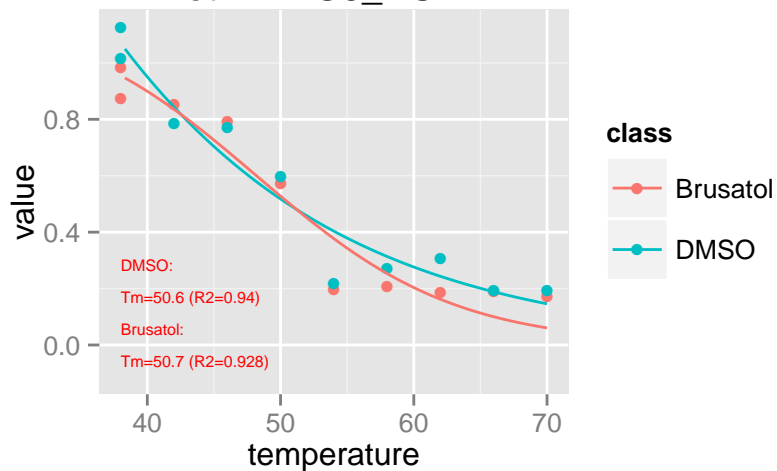

Prot: ARFP1\_HUMAN

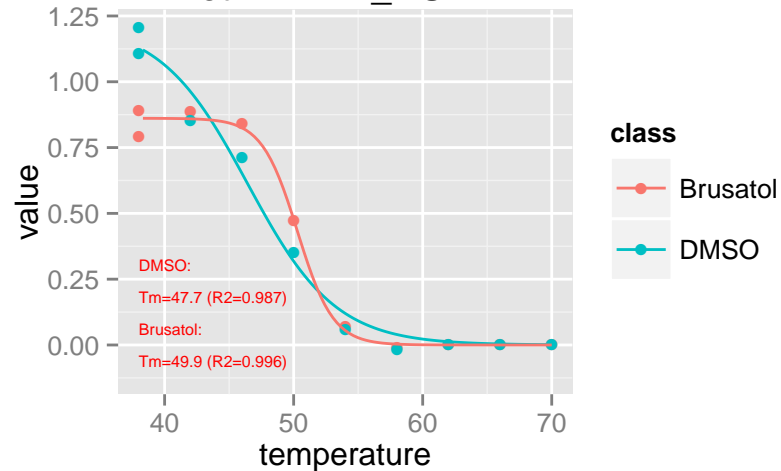

Prot: ARHG1\_HUMAN

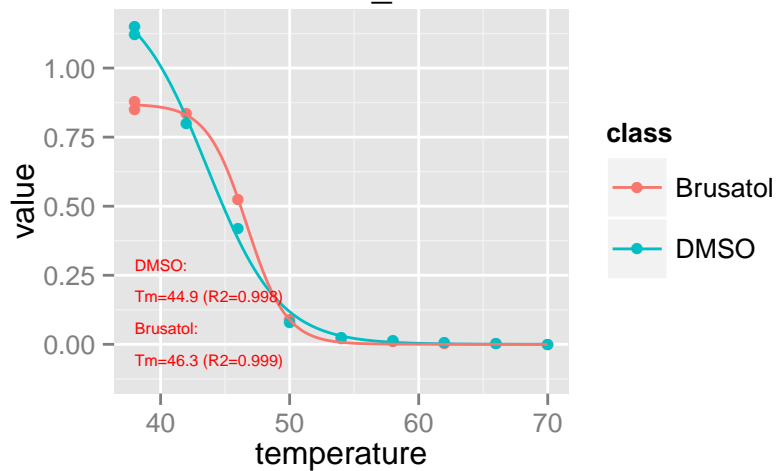

Prot: ARHG2\_HUMAN

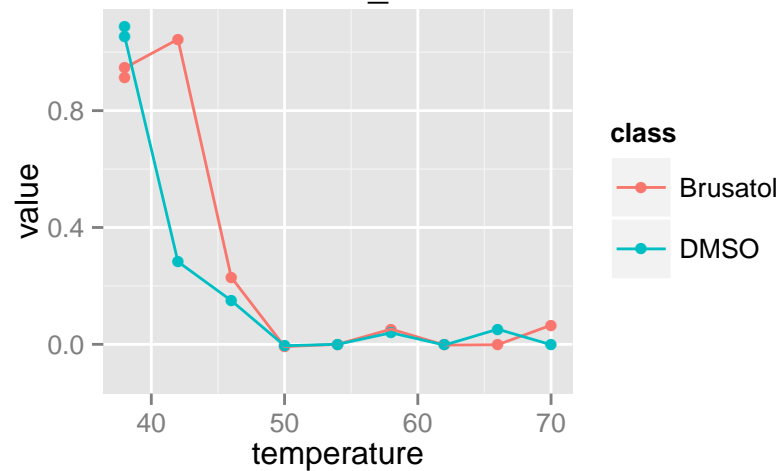

Prot: ARHG7\_HUMAN

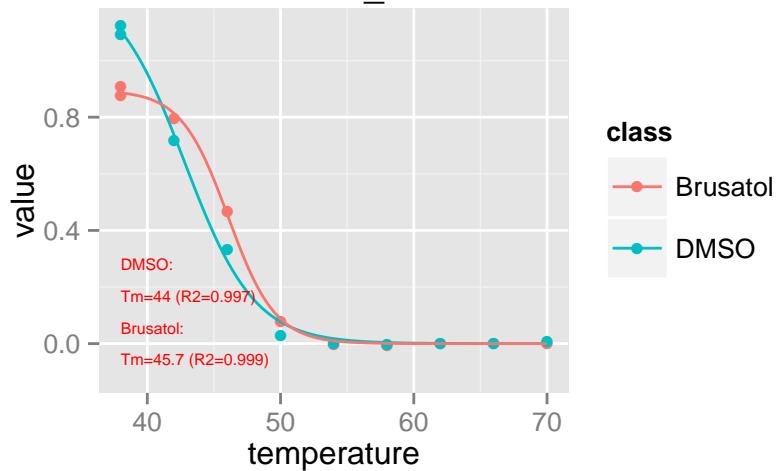

Prot: ARHGA\_HUMAN

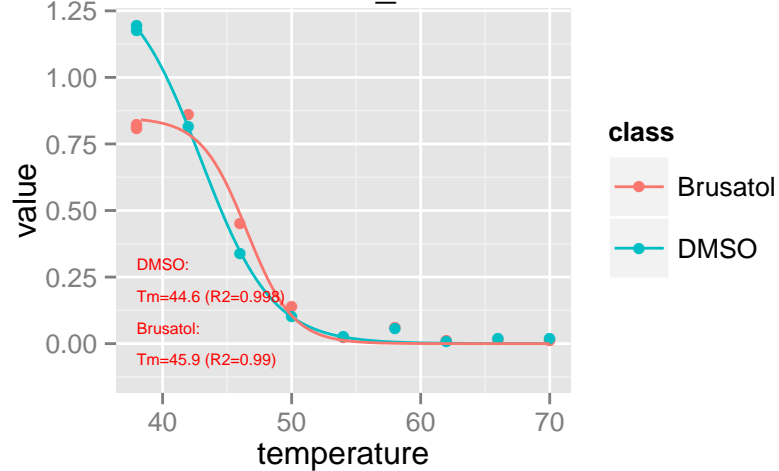

Prot: ARHGI\_HUMAN

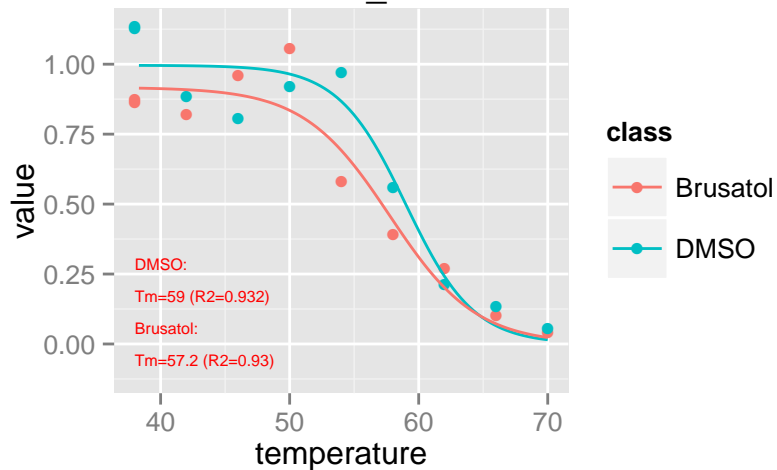

Prot: ARHL2\_HUMAN

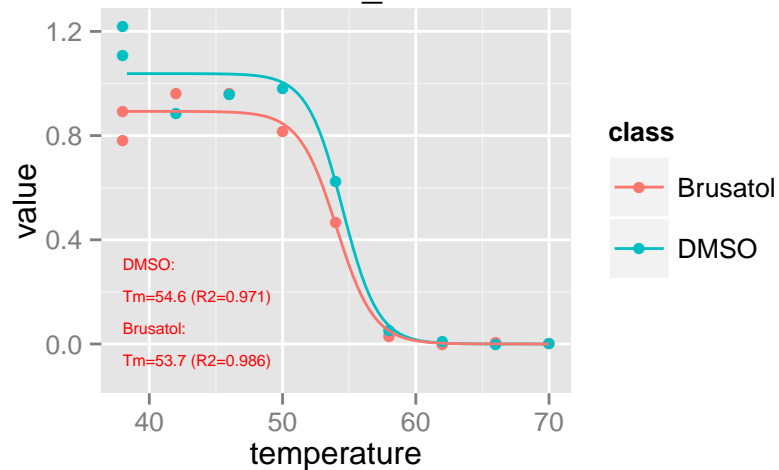

Prot: ARI1\_HUMAN

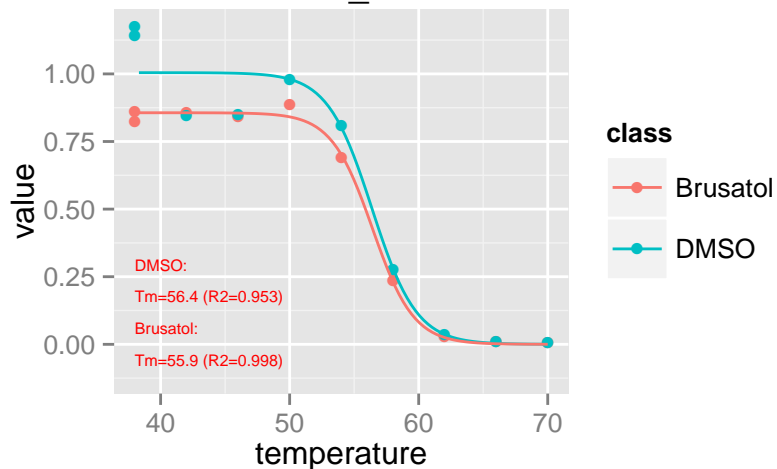

Prot: ARI1A\_HUMAN

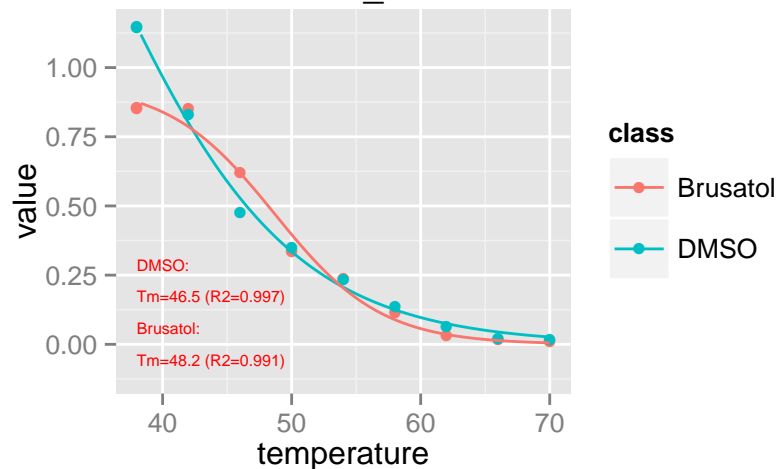

Prot: ARI2\_HUMAN

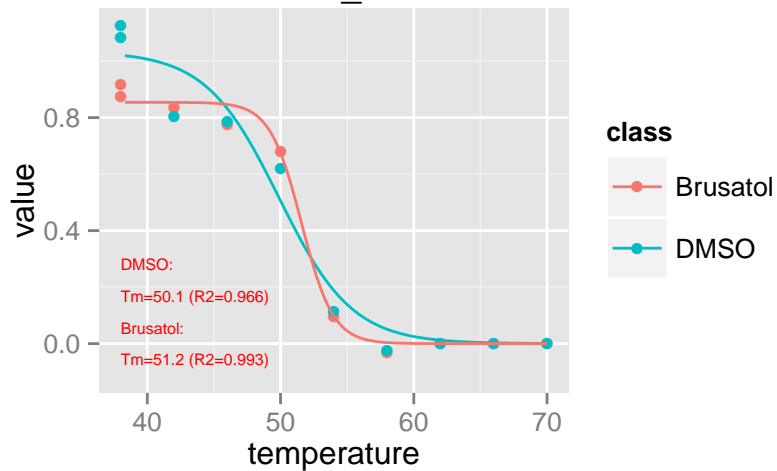

Prot: ARID2\_HUMAN

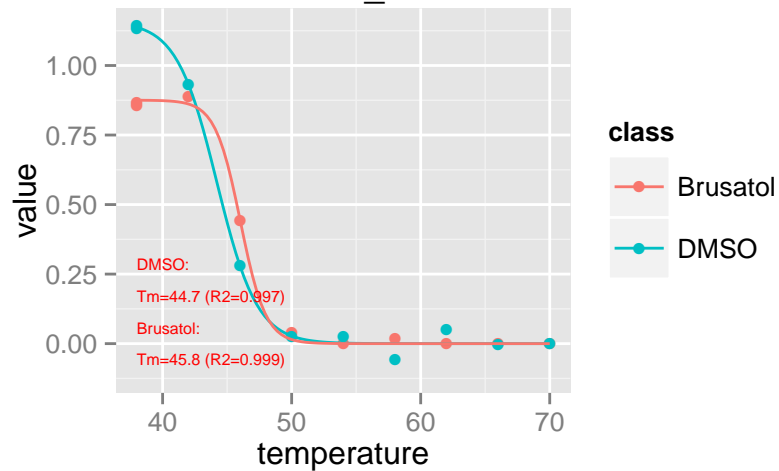

Prot: ARK72\_HUMAN

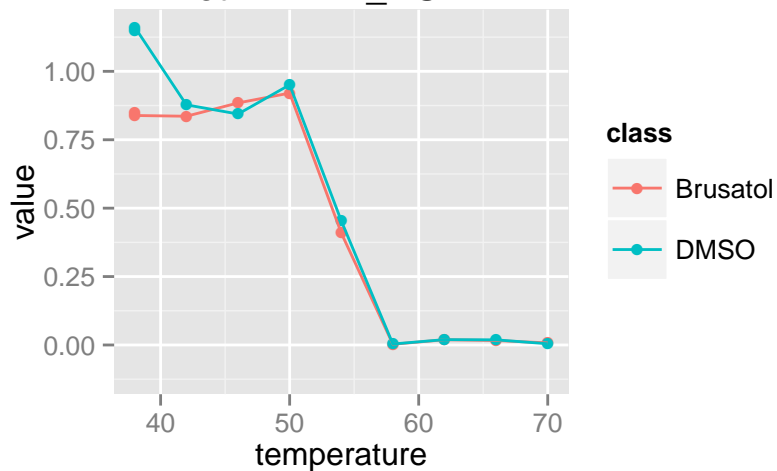

Prot: ARL1\_HUMAN

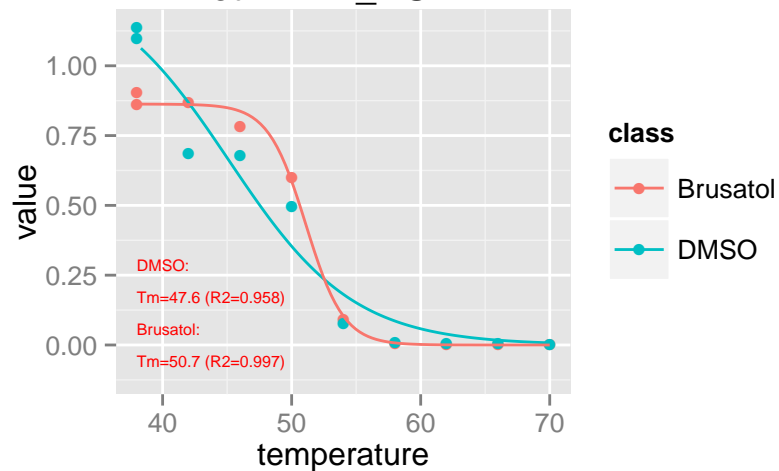

Prot: ARL2\_HUMAN

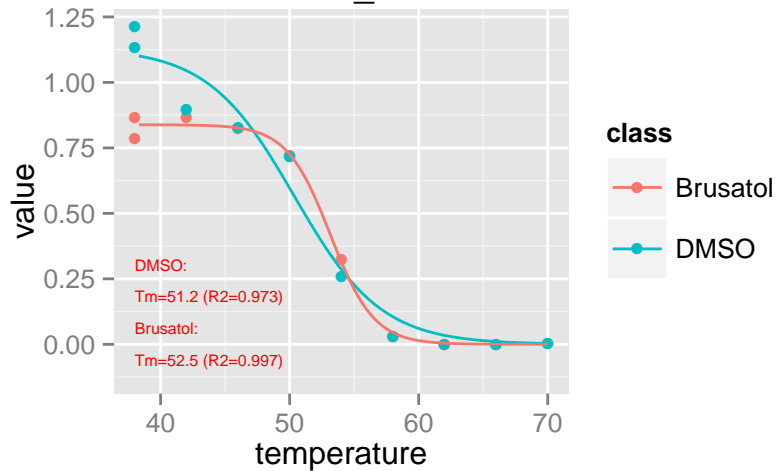

Prot: ARL3\_HUMAN

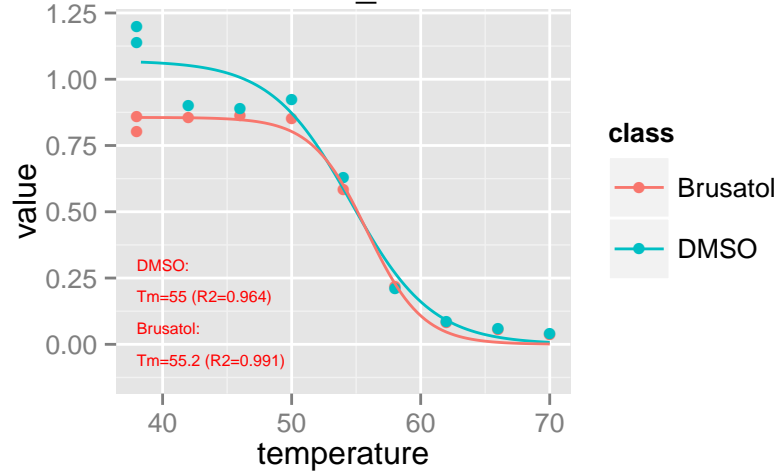

Prot: ARLY\_HUMAN

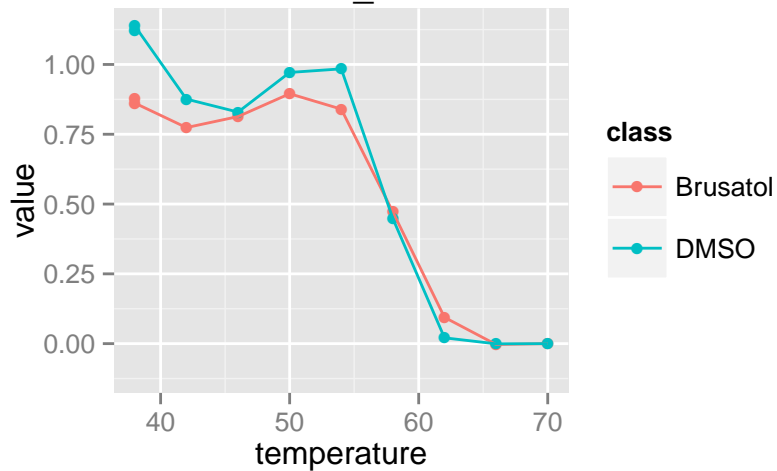

Prot: ARMC1\_HUMAN

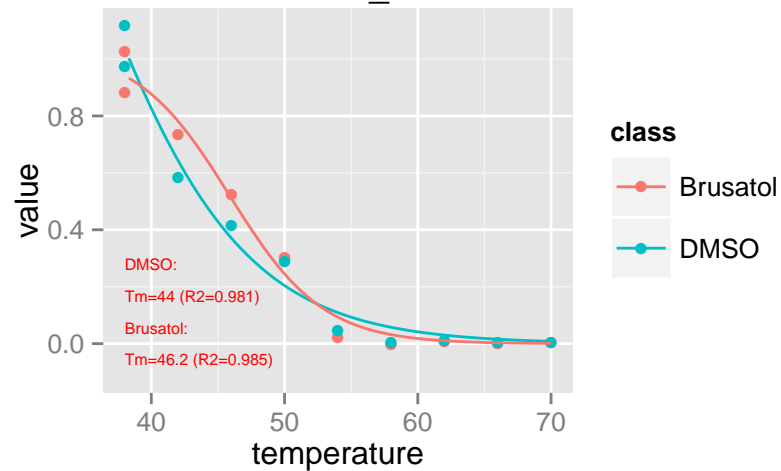

Prot: ARMC6\_HUMAN

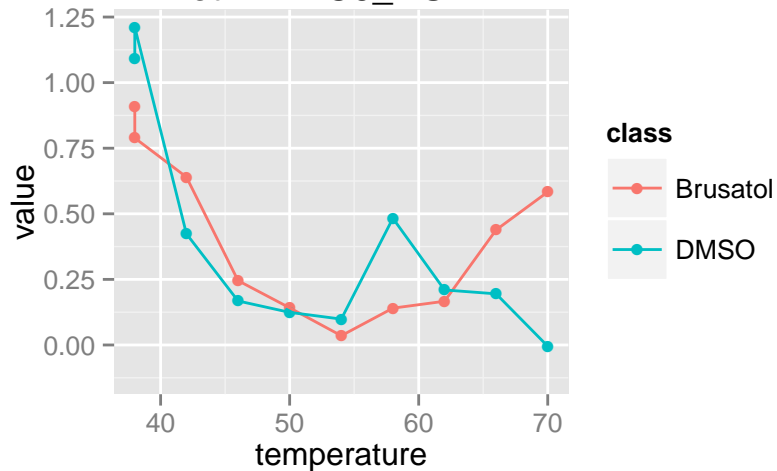

Prot: ARMC9\_HUMAN

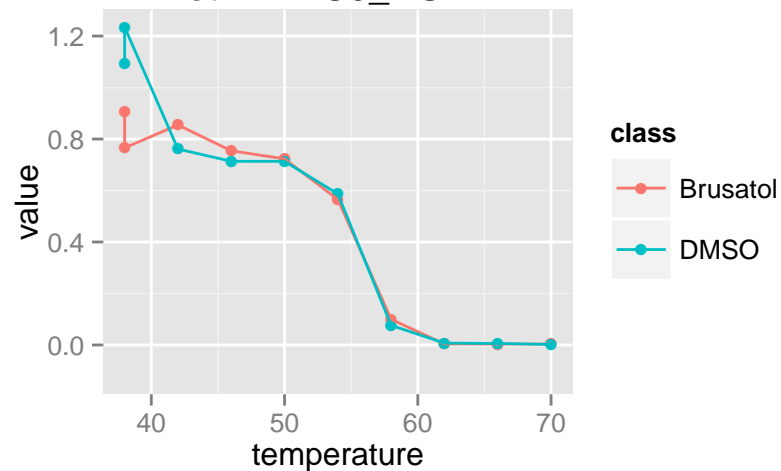

Prot: ARP10\_HUMAN

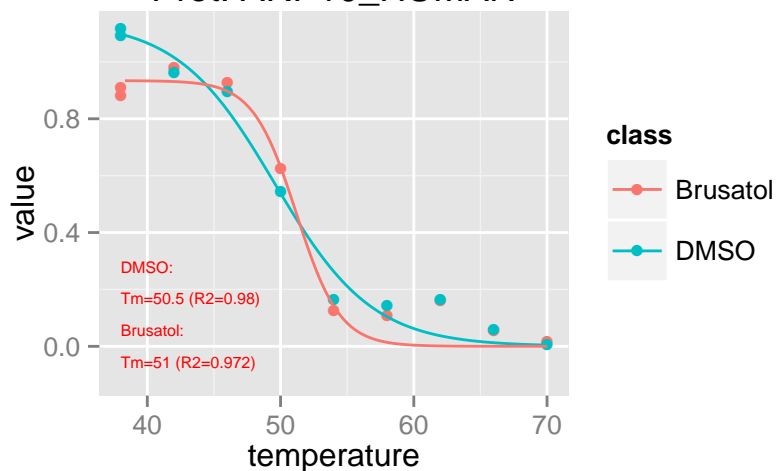

Prot: ARP19\_HUMAN

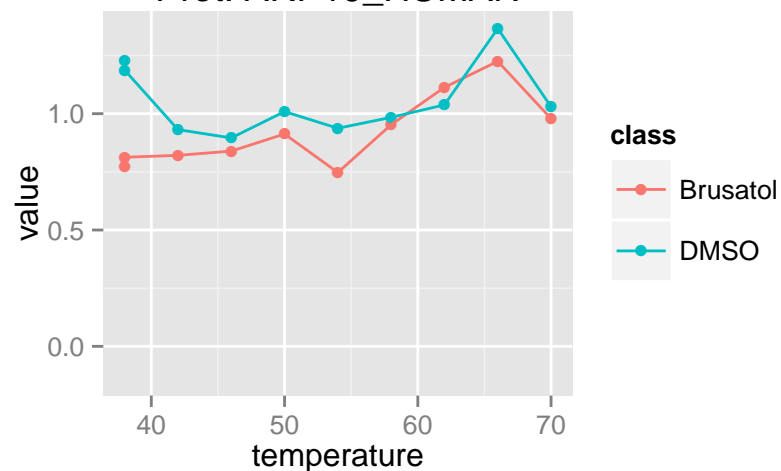



Prot: ARP2\_HUMAN

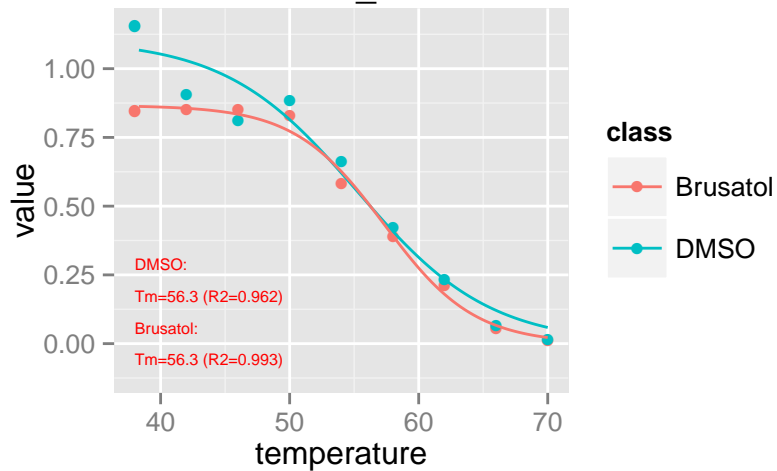

Prot: ARP3\_HUMAN

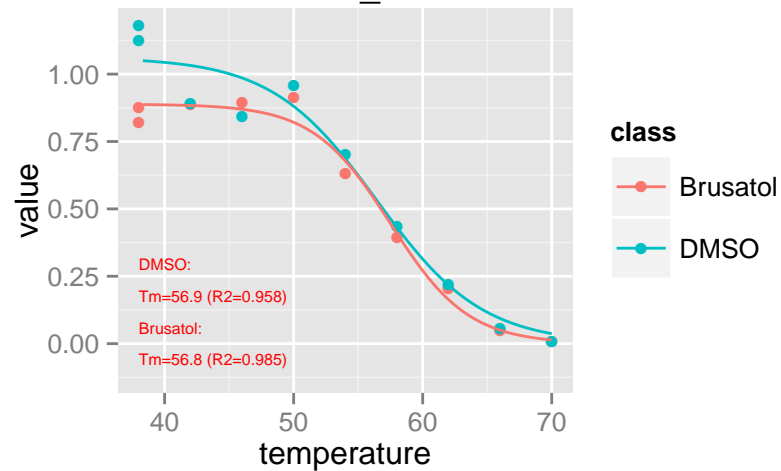

Prot: ARP3B\_HUMAN

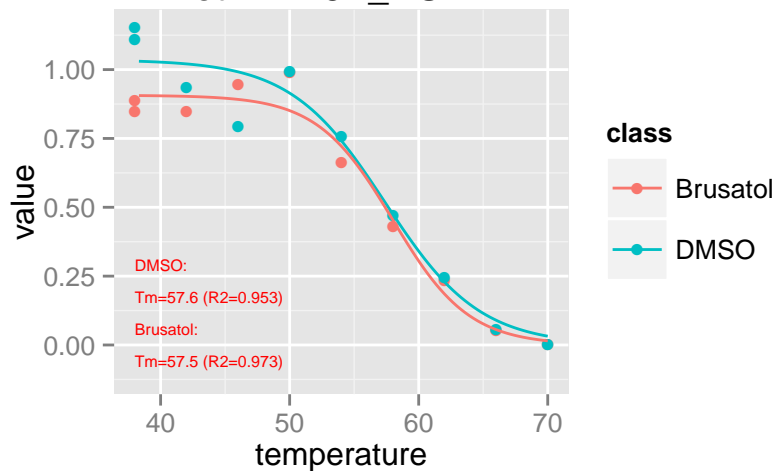

Prot: ARP5\_HUMAN

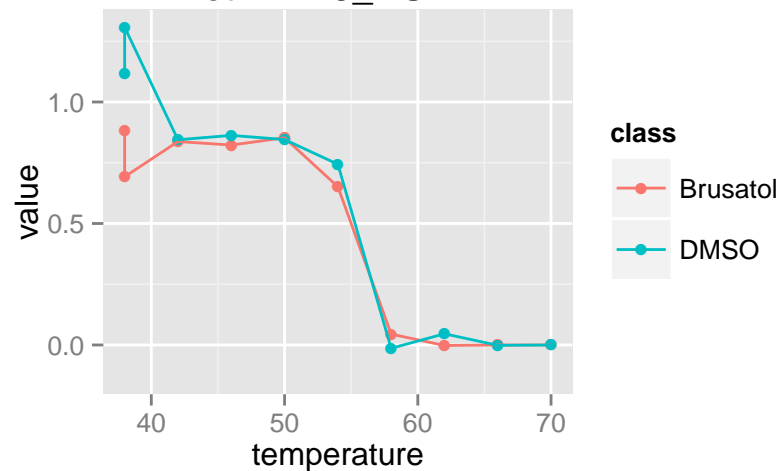

Prot: ARP5L\_HUMAN

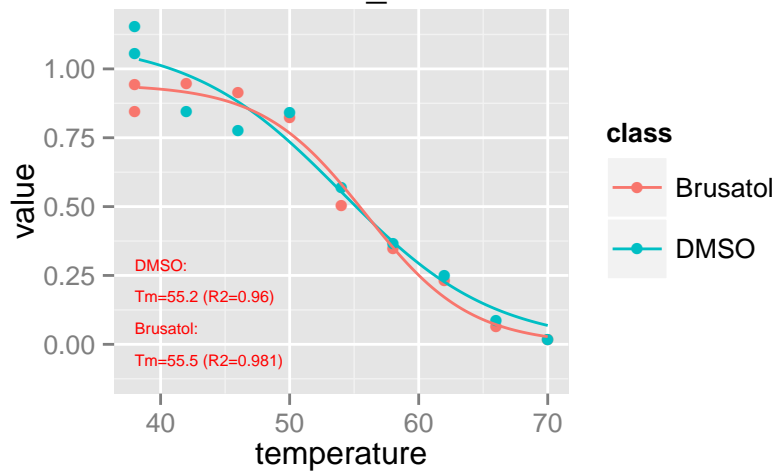

Prot: ARPC2\_HUMAN

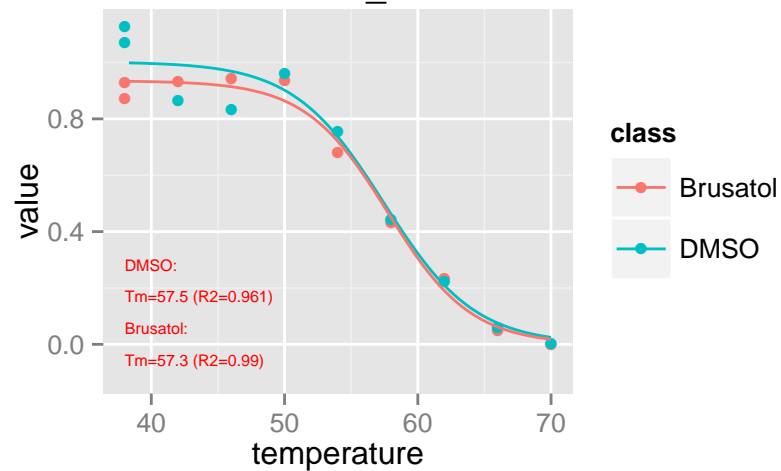

Prot: ARPC3\_HUMAN

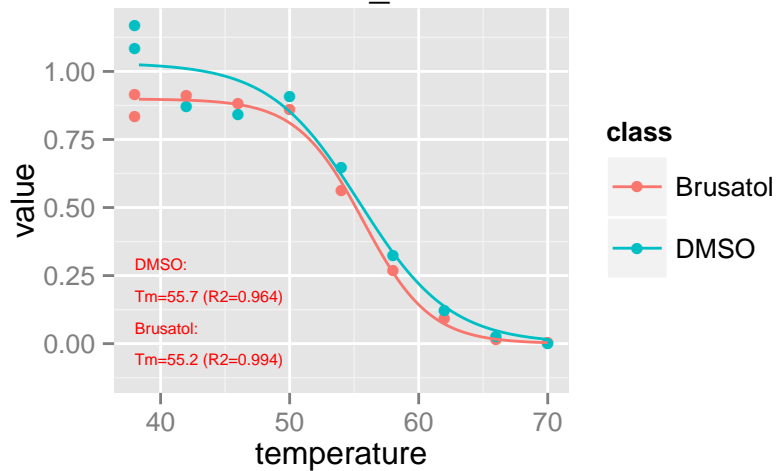

Prot: ARPC4\_HUMAN

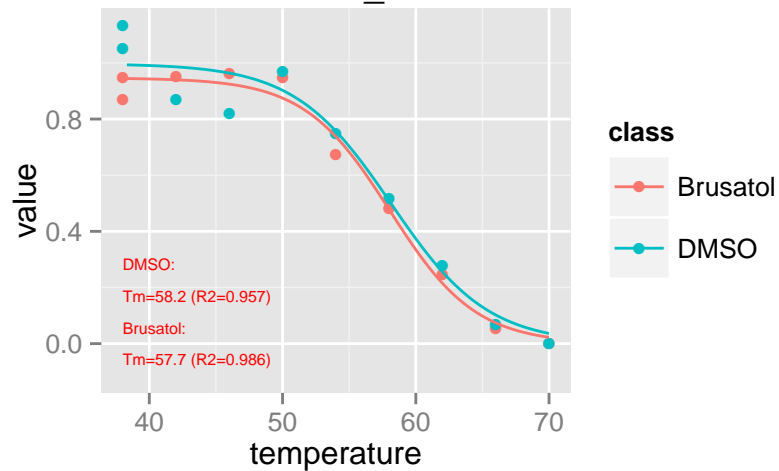

Prot: ARPC5\_HUMAN

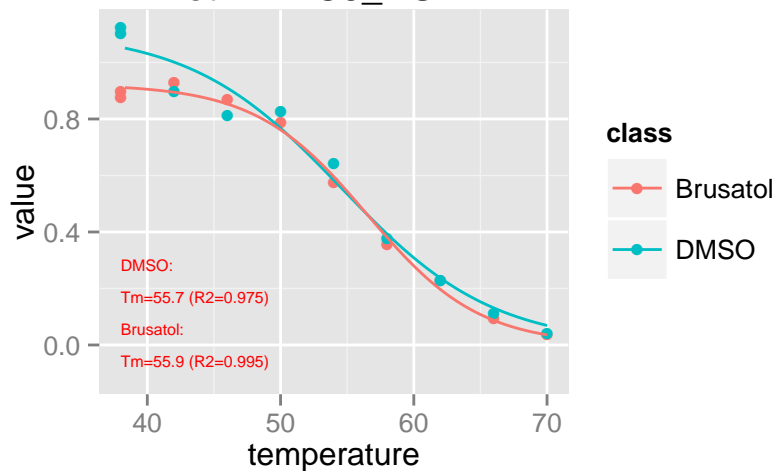

Prot: ARRB1\_HUMAN

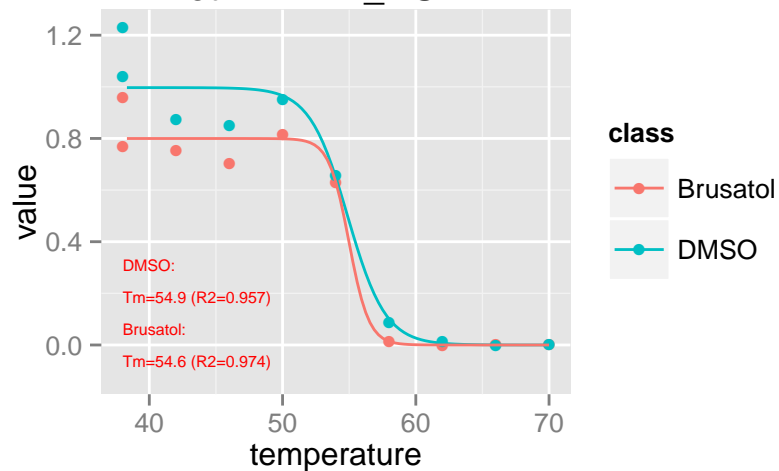

Prot: ARRB2\_HUMAN

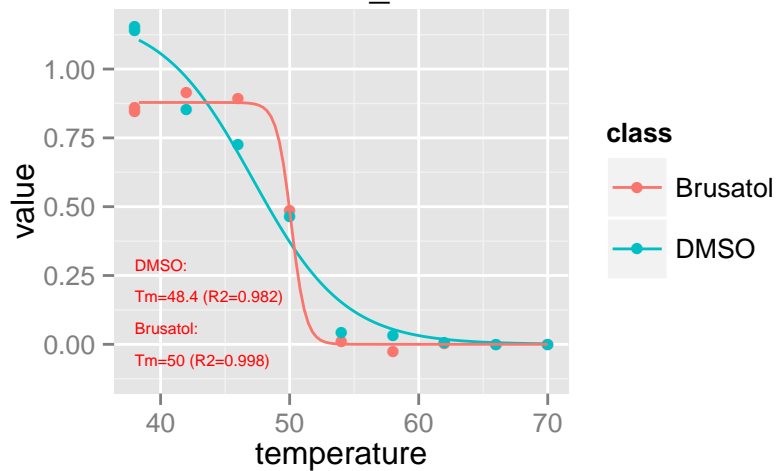

Prot: ARSA\_HUMAN

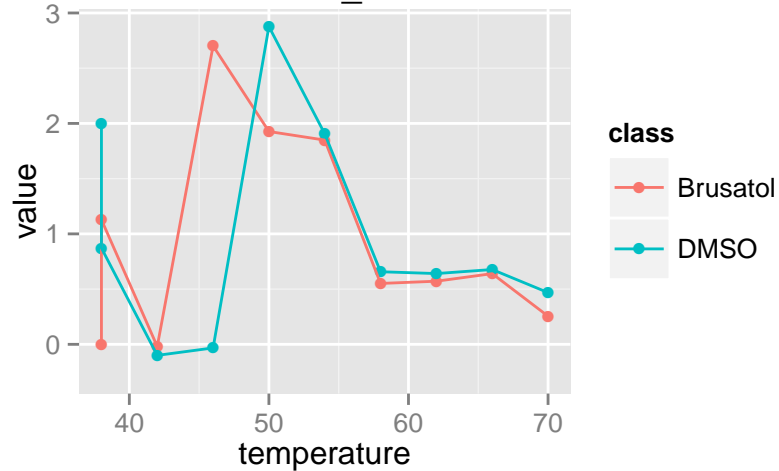

Prot: ARSB\_HUMAN

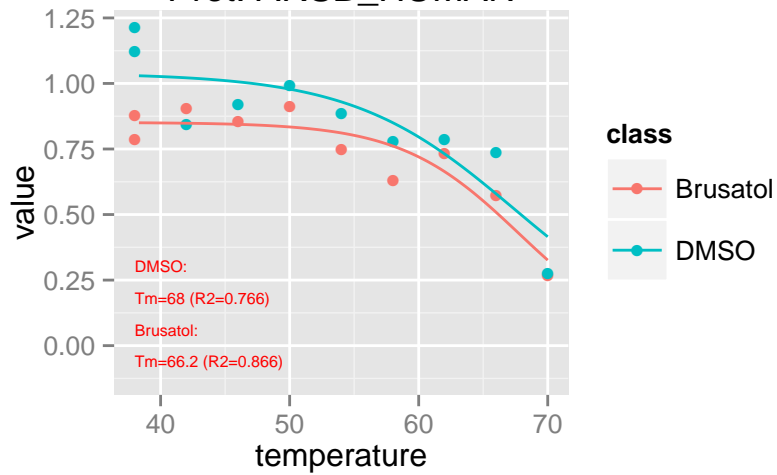

Prot: AS3MT\_HUMAN

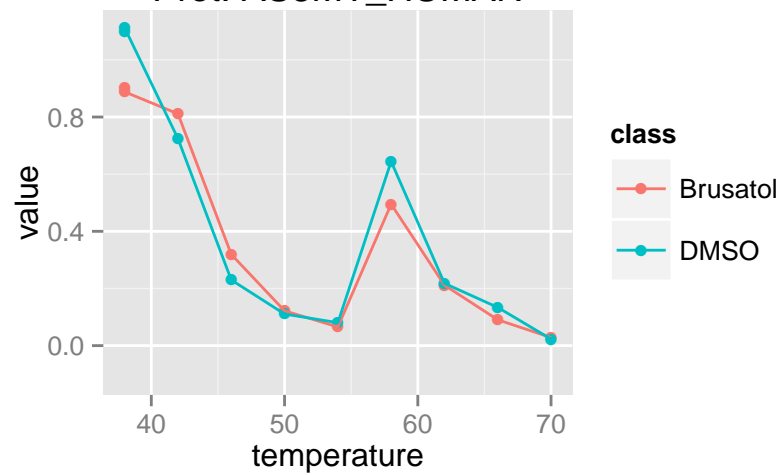

Prot: ASAH1\_HUMAN

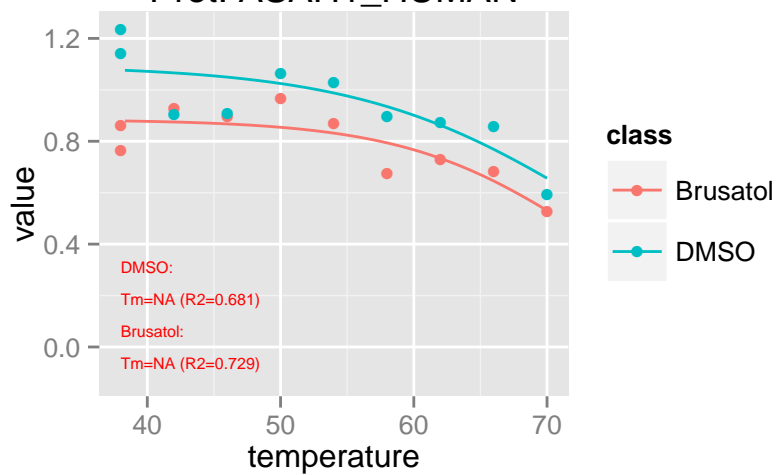

Prot: ASAP1\_HUMAN

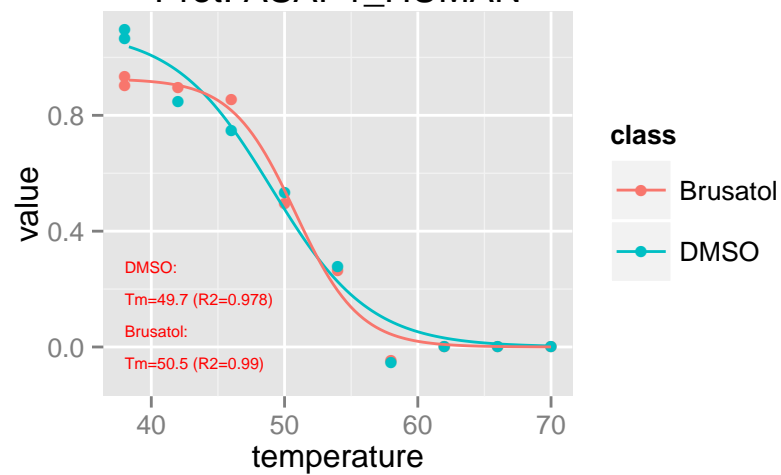

Prot: ASAP2\_HUMAN

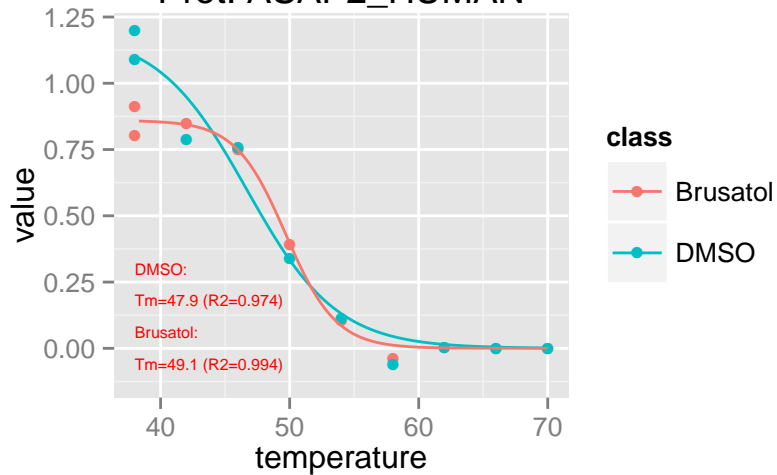

Prot: ASB9\_HUMAN

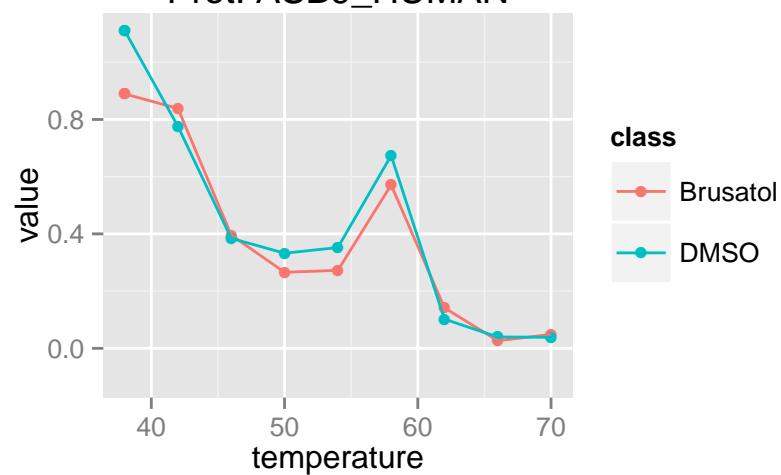

Prot: ASC\_HUMAN

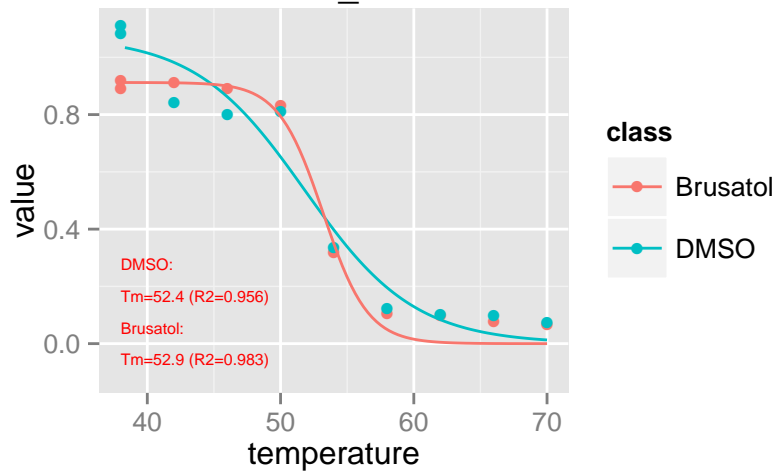

Prot: ASCC2\_HUMAN

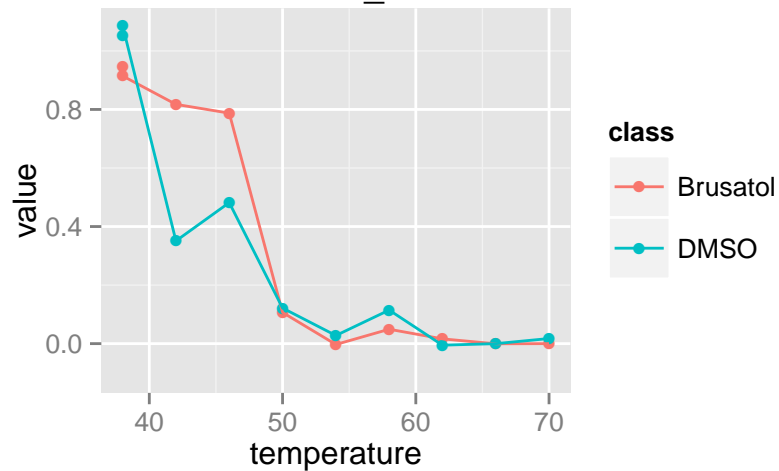

Prot: ASF1A\_HUMAN

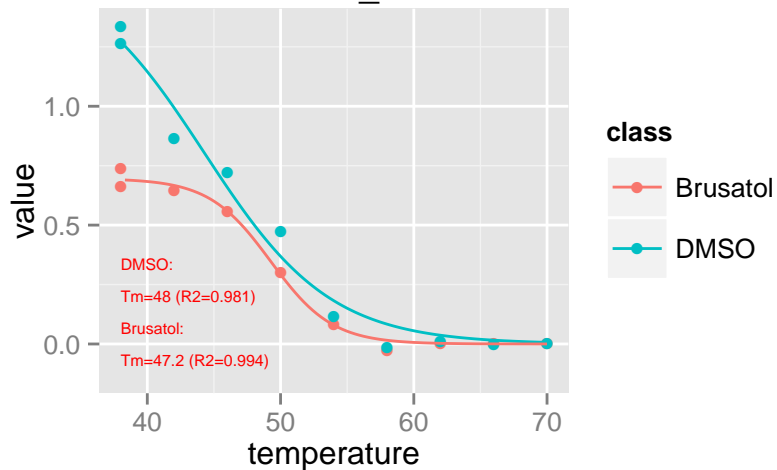

Prot: ASH2L\_HUMAN

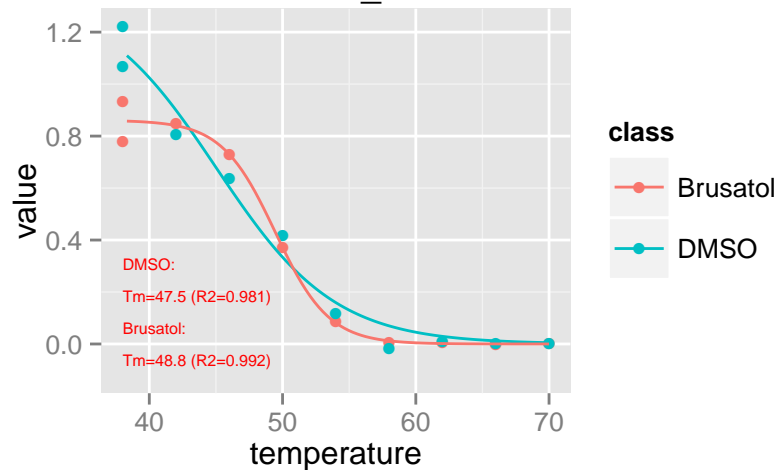

Prot: ASML\_HUMAN

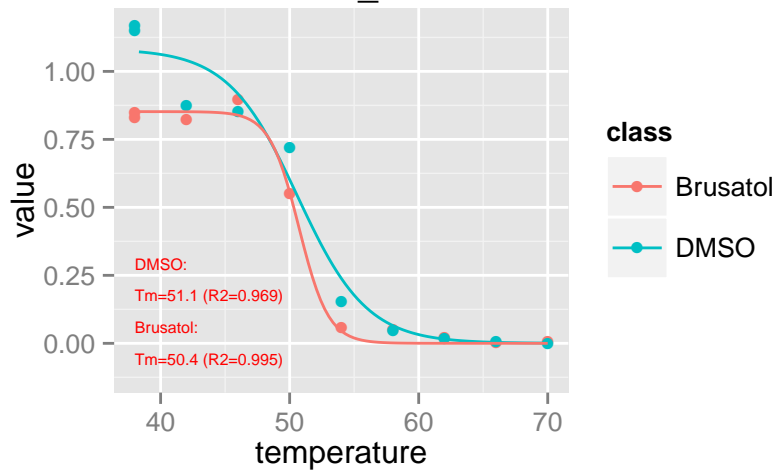

Prot: ASNA\_HUMAN

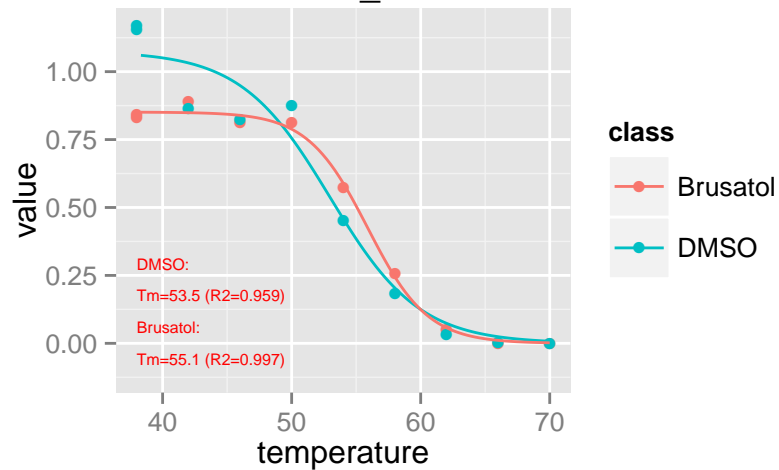

Prot: ASNS\_HUMAN

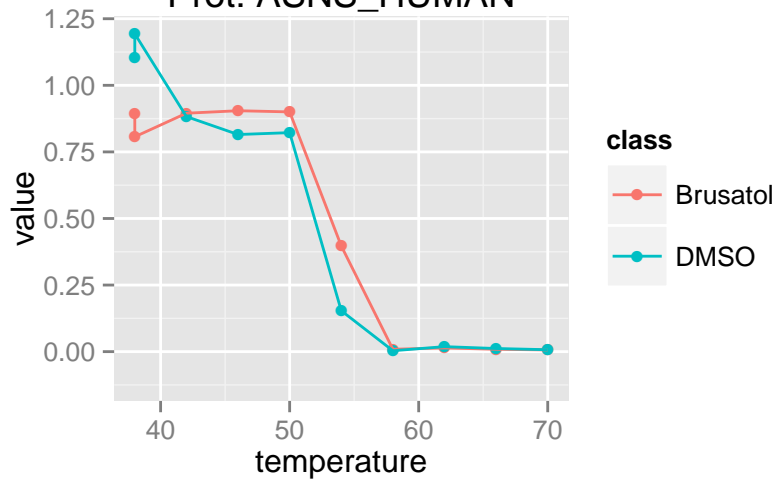

Prot: ASPC1\_HUMAN

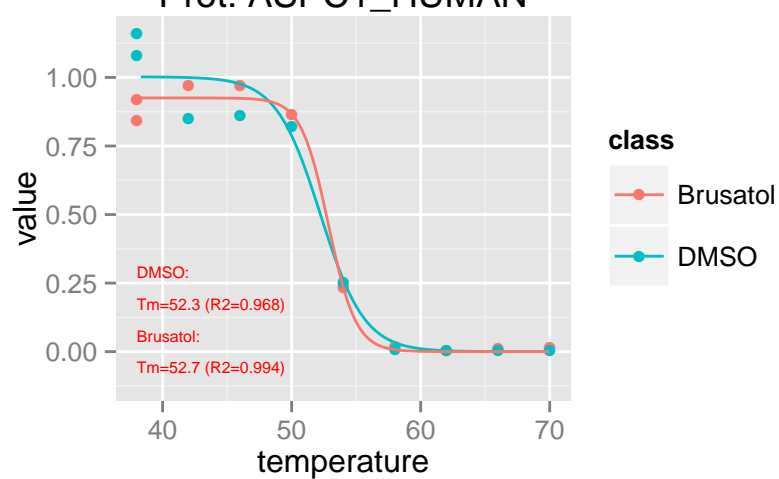

Prot: ASPH\_HUMAN

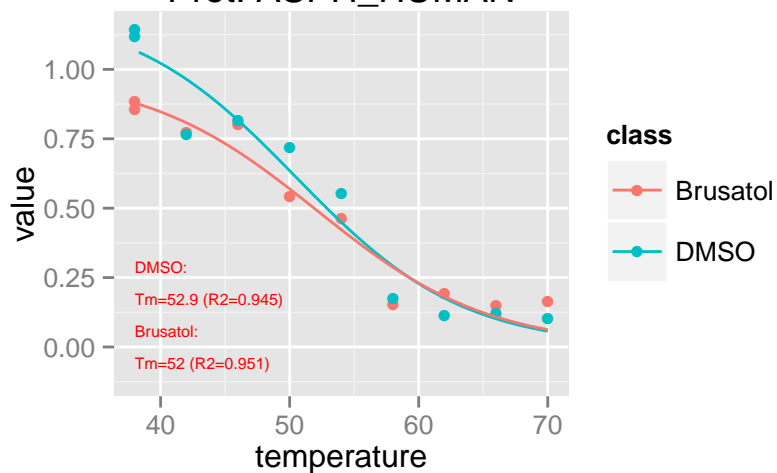

Prot: AT5EL\_HUMAN

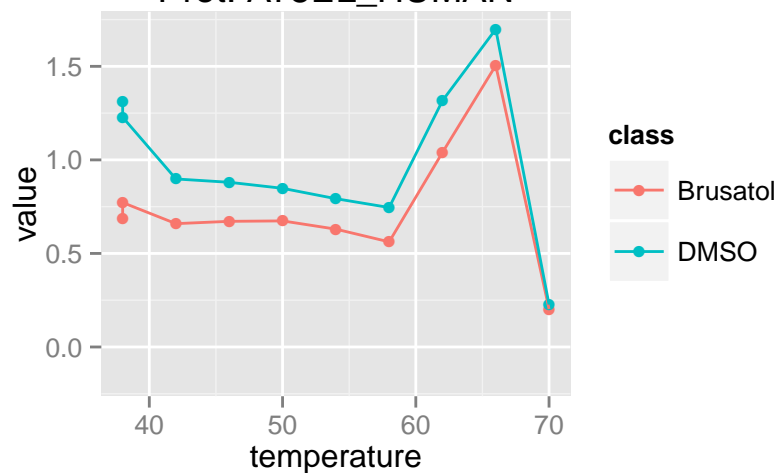

Prot: ATE1\_HUMAN

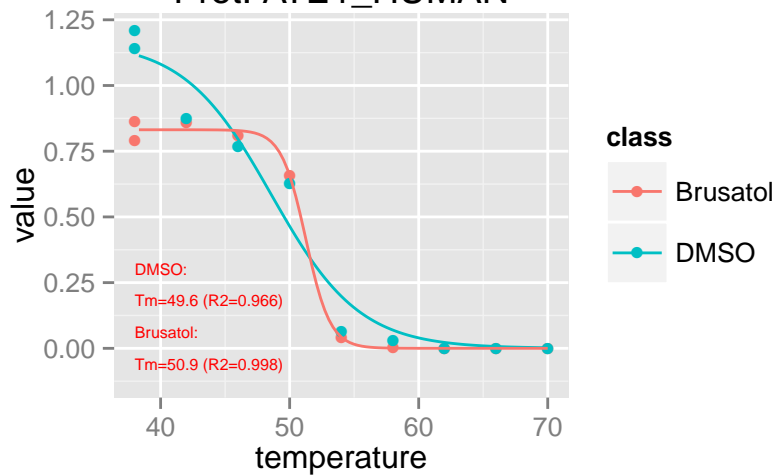

Prot: ATF1\_HUMAN

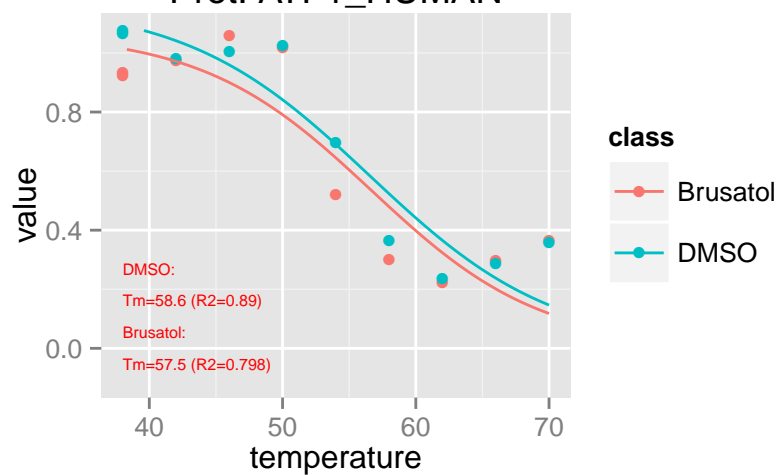

Prot: ATG12\_HUMAN

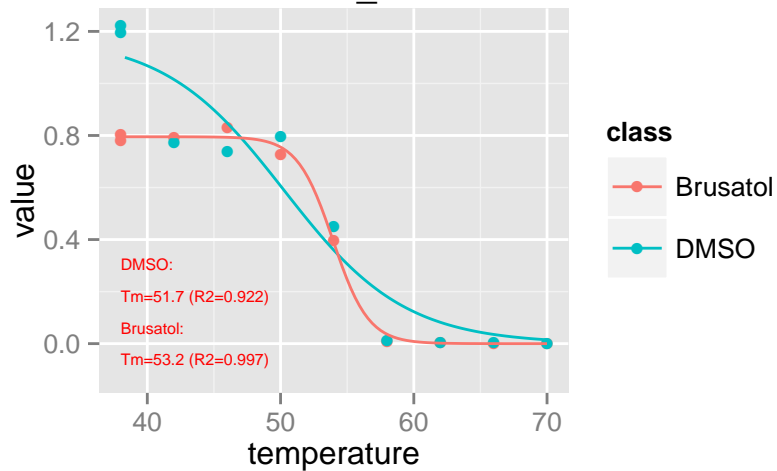

Prot: ATG3\_HUMAN

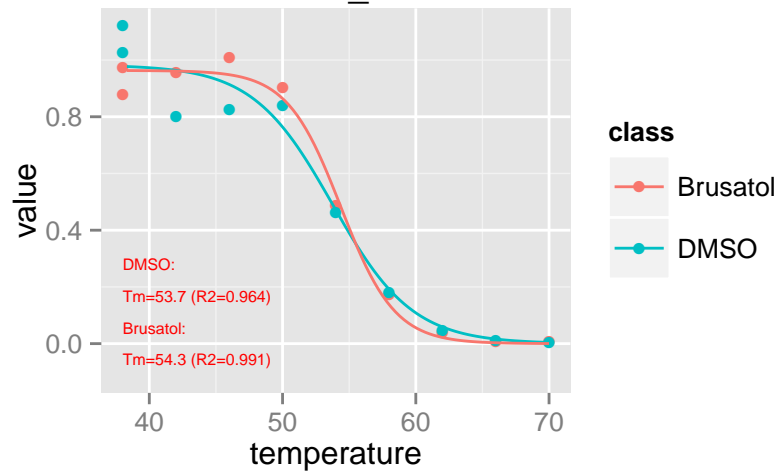

Prot: ATG5\_HUMAN

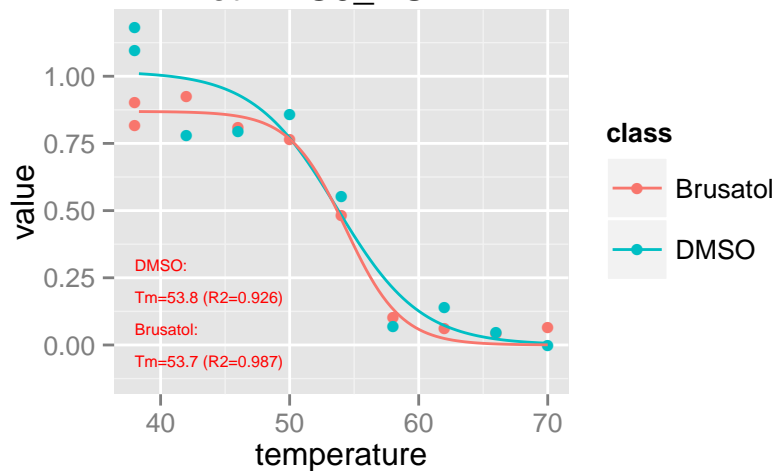

Prot: ATG7\_HUMAN

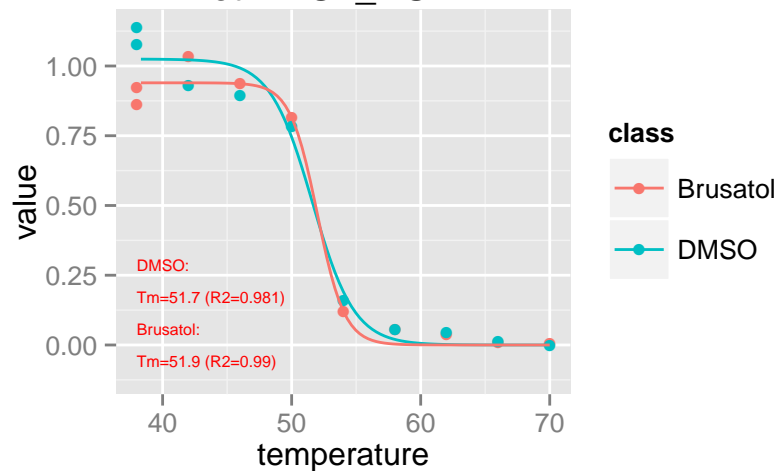

Prot: ATIF1\_HUMAN

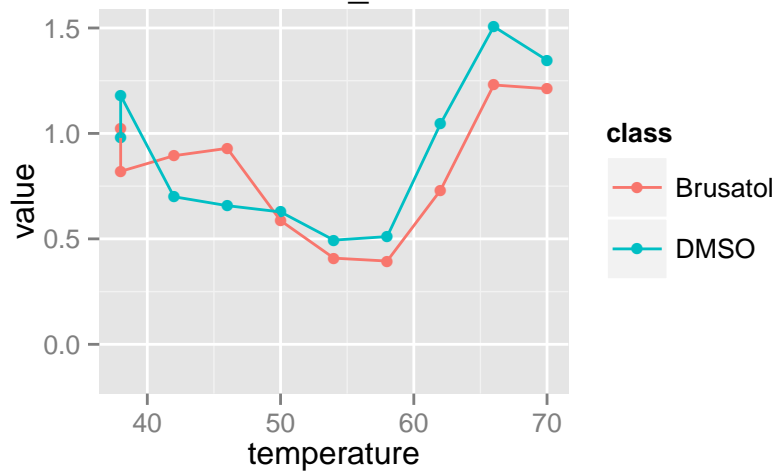

Prot: ATOX1\_HUMAN

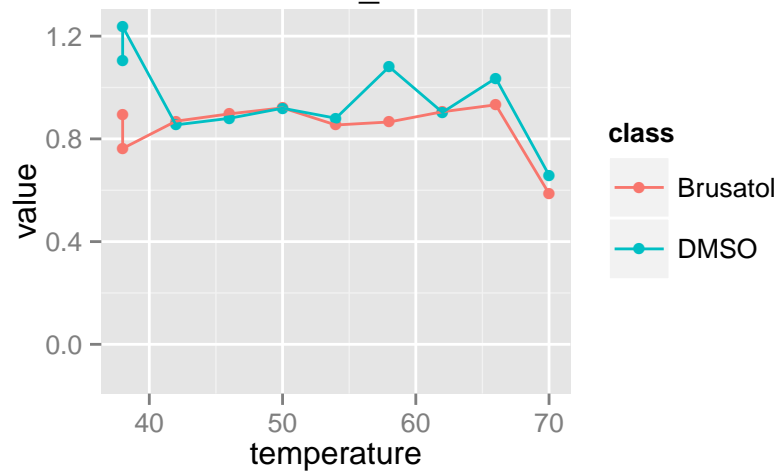

Prot: ATPA\_HUMAN

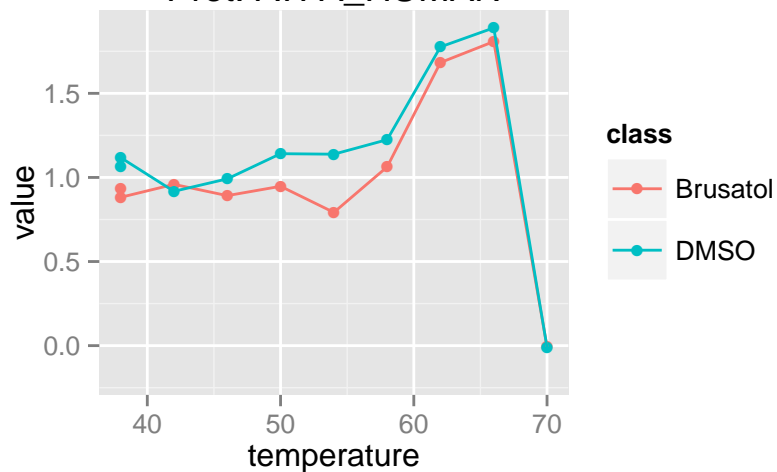

Prot: ATPB\_HUMAN

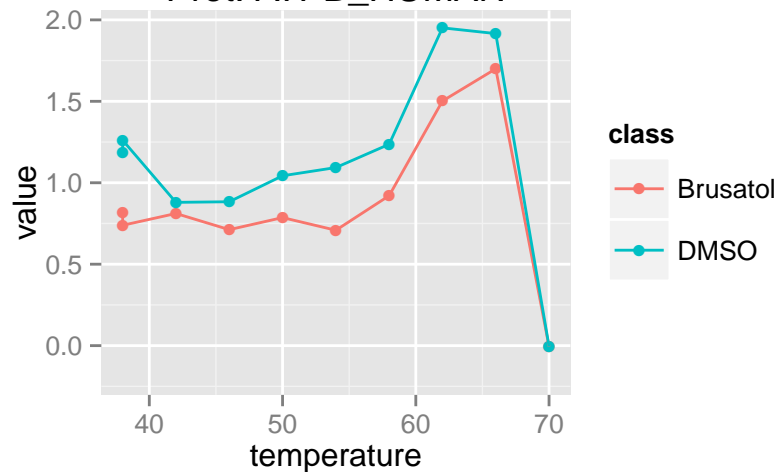

Prot: ATPD\_HUMAN

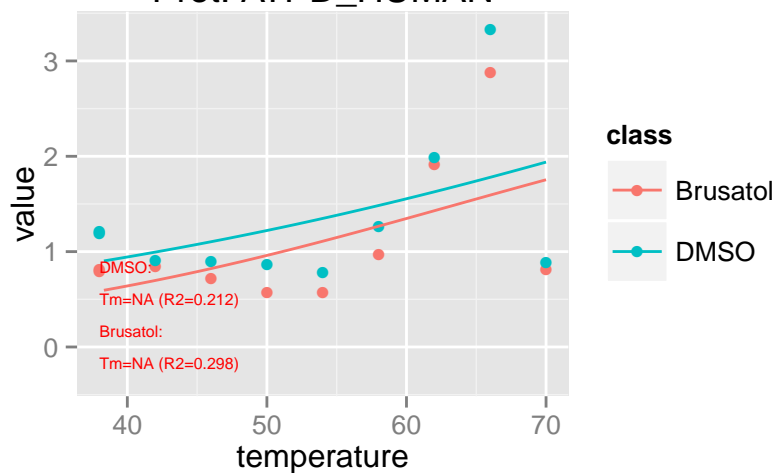

Prot: ATPF1\_HUMAN

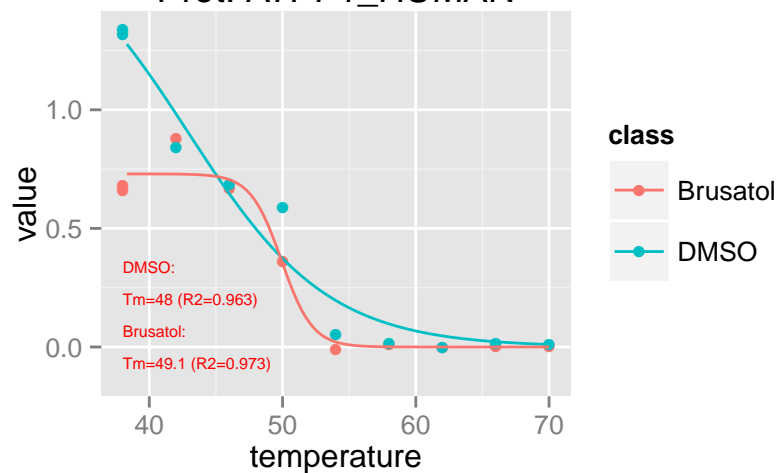

Prot: ATPF2\_HUMAN

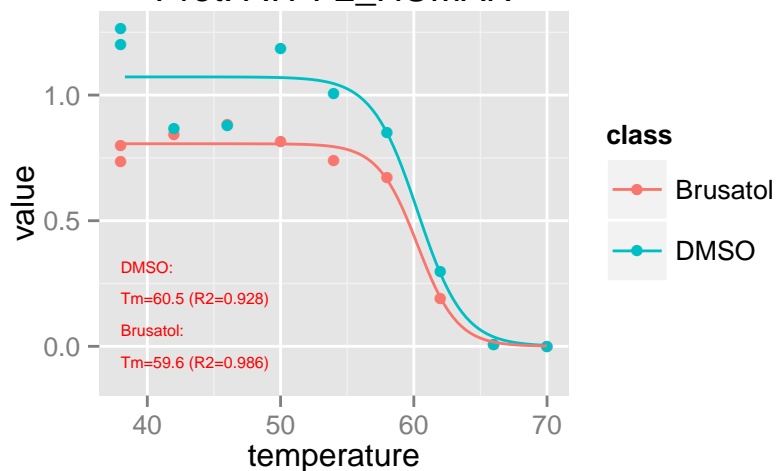

Prot: ATPG\_HUMAN

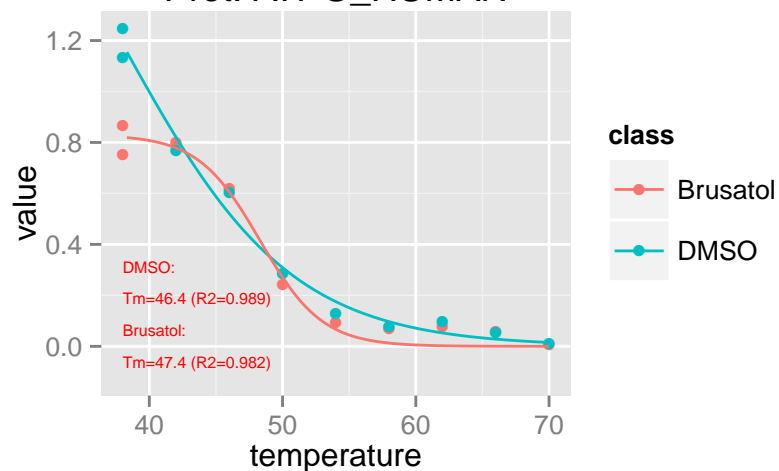

Prot: ATRX\_HUMAN

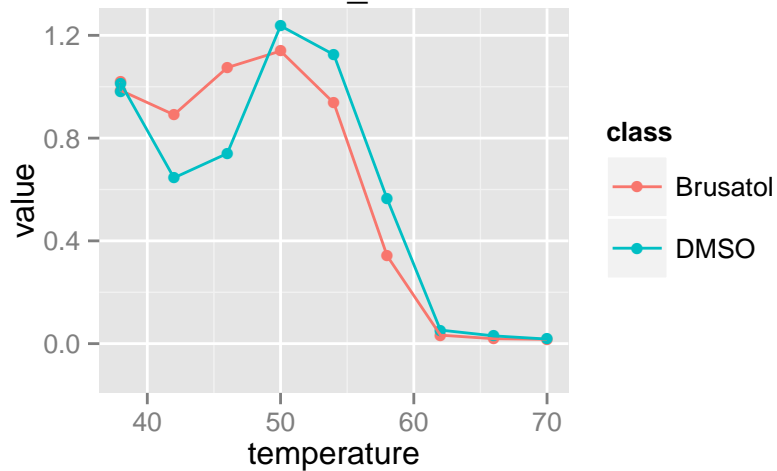

Prot: ATX10\_HUMAN

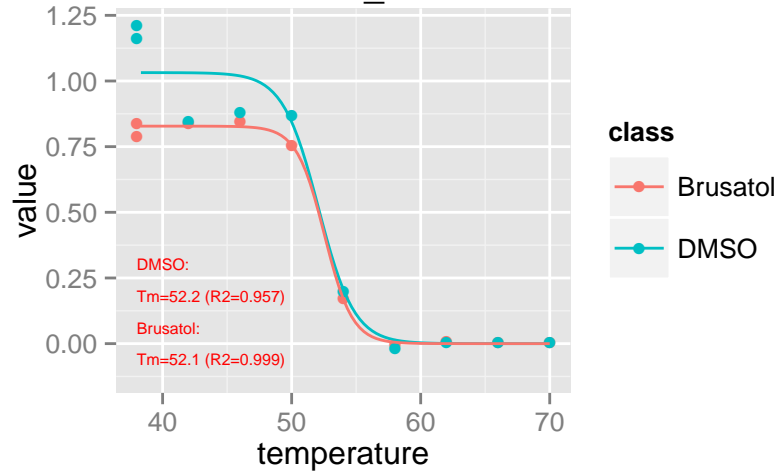

Prot: ATX2\_HUMAN

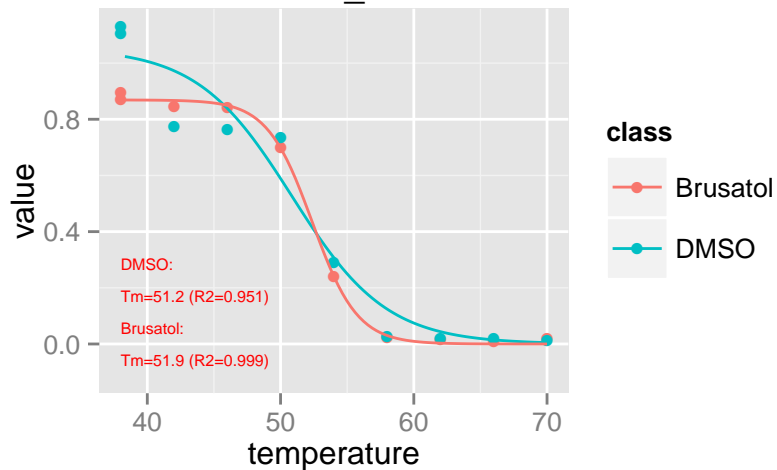

Prot: ATX2L\_HUMAN

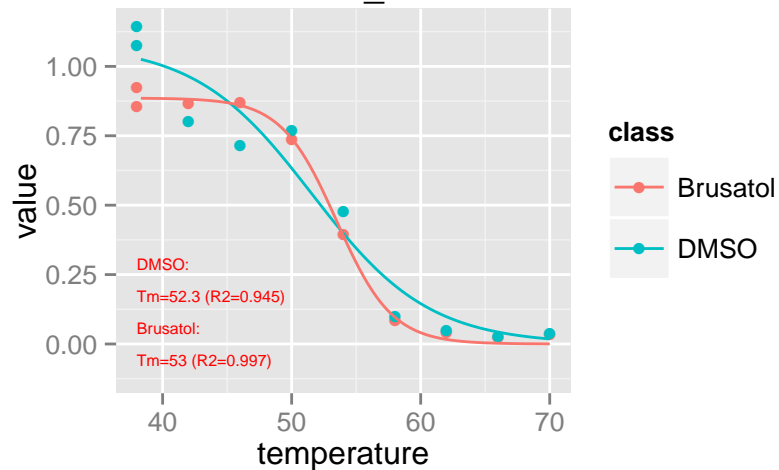

Prot: AVEN\_HUMAN

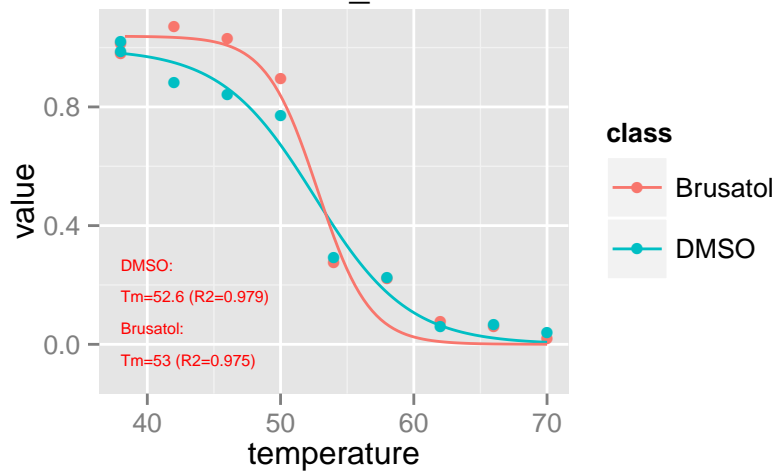

Prot: AVL9\_HUMAN

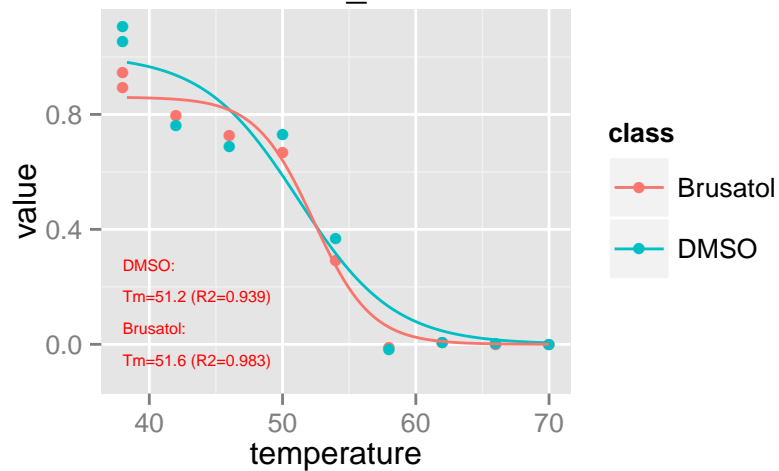



Prot: B1AK87\_HUMAN

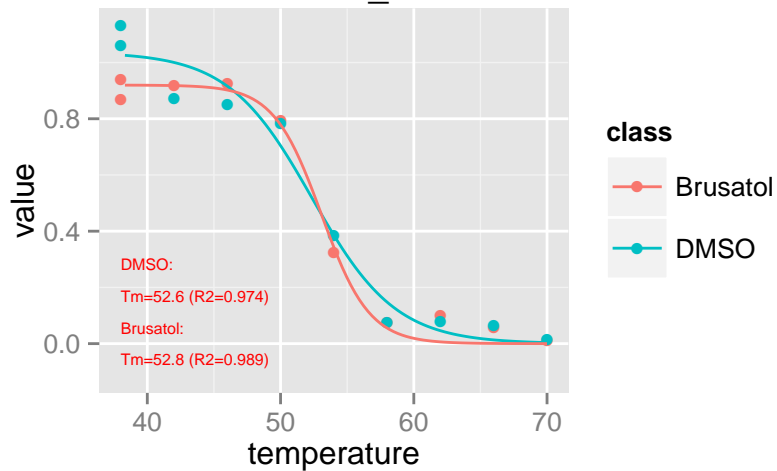

Prot: B2RCJ7\_HUMAN

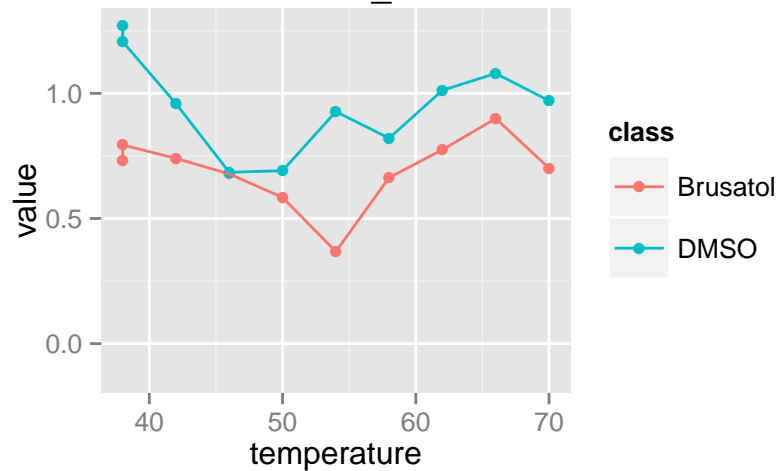

Prot: B2RCM3\_HUMAN

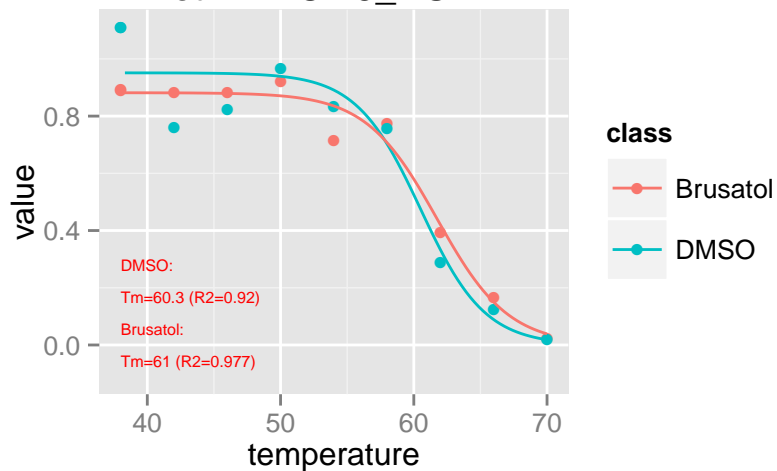

Prot: B2RDE1\_HUMAN

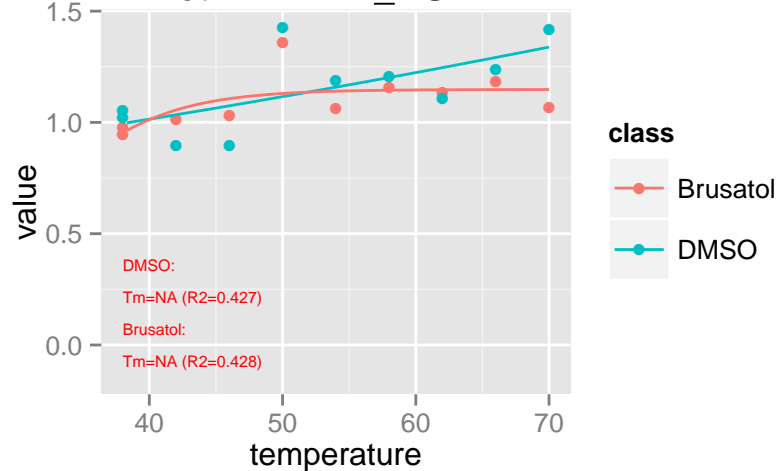

Prot: B2RDE8\_HUMAN

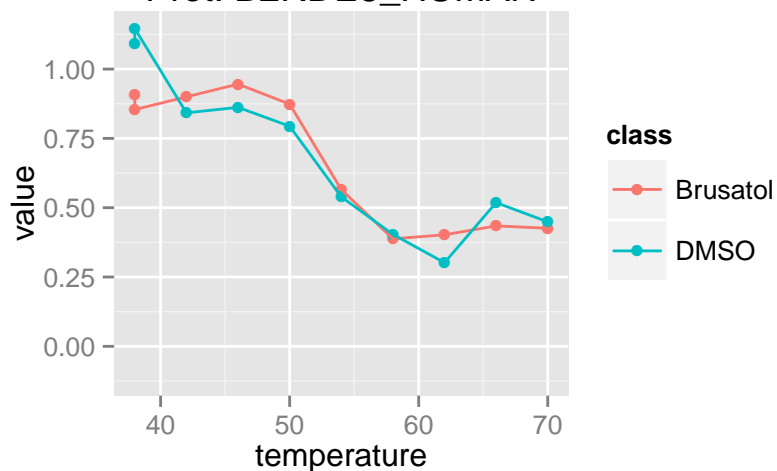

Prot: B2RDT9\_HUMAN

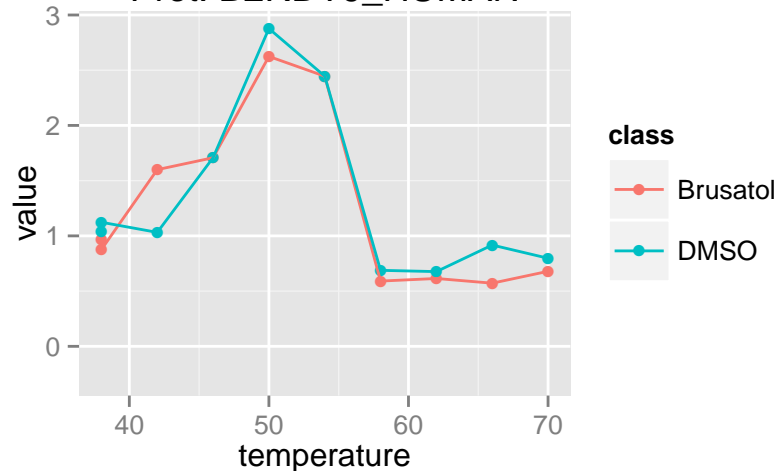

Prot: B2RDY9\_HUMAN

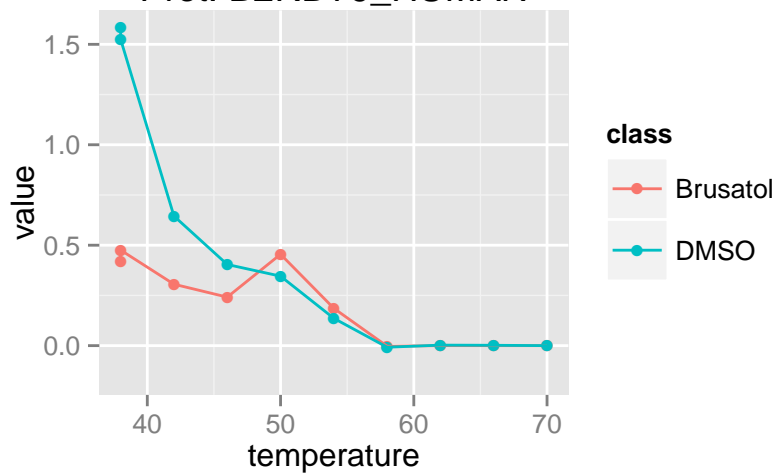

Prot: B2ZZ83\_HUMAN

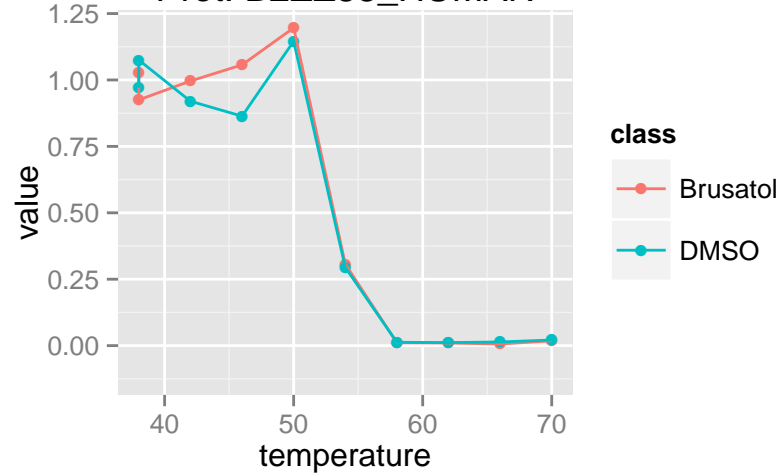

Prot: B3KM58\_HUMAN

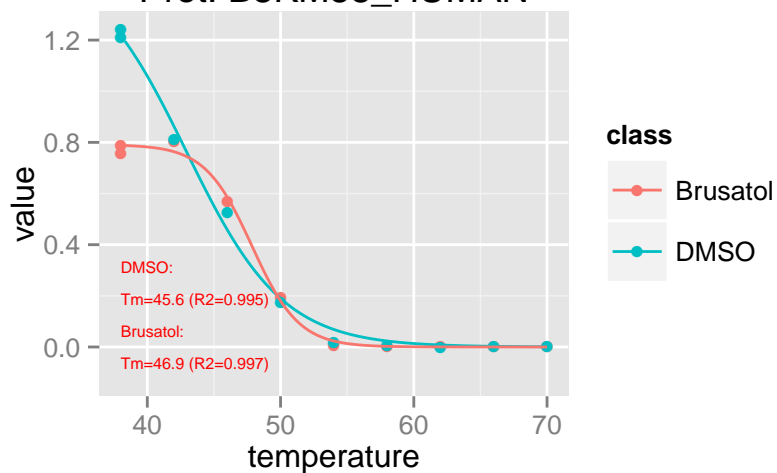

Prot: B3KNS4\_HUMAN

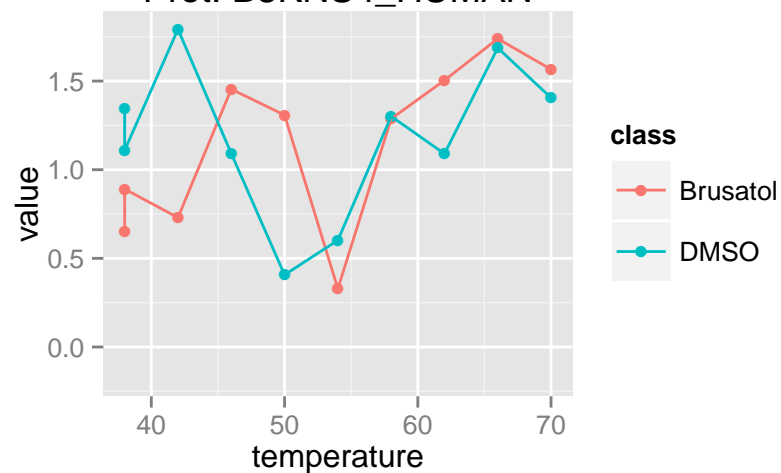

Prot: B3KRI9\_HUMAN

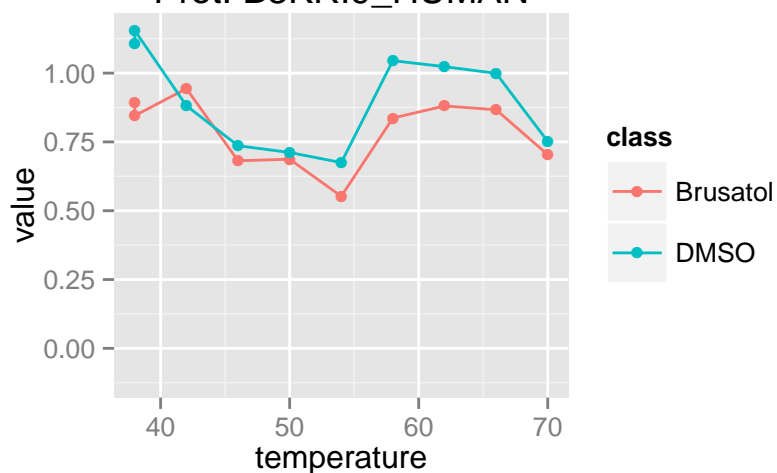

Prot: B3KVE3\_HUMAN

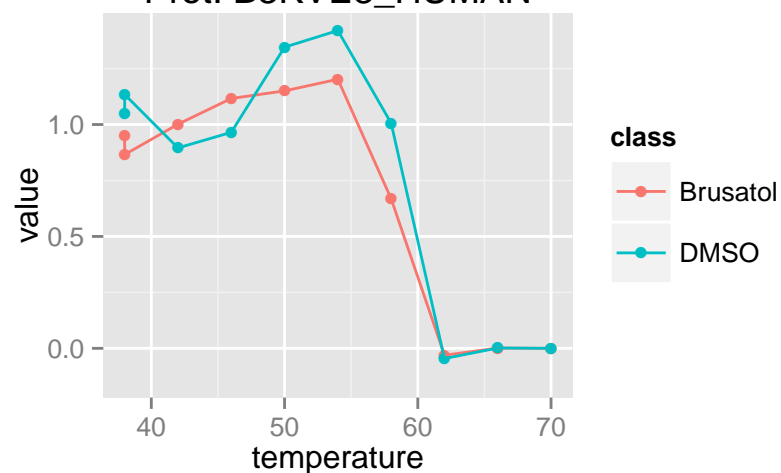

Prot: B3SXQ8\_HUMAN

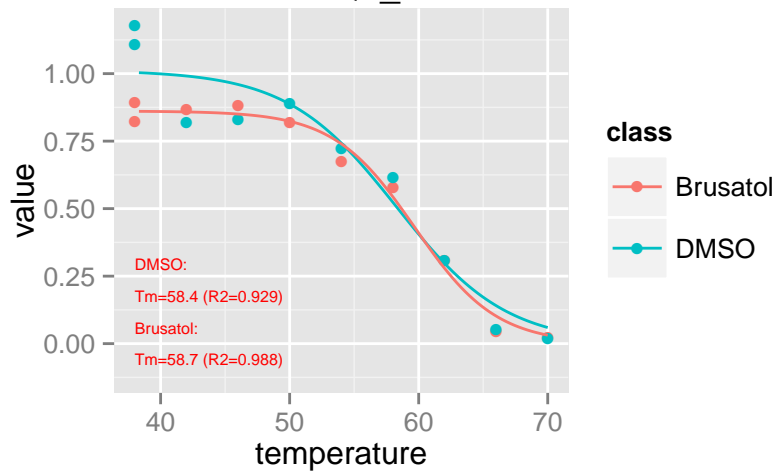

Prot: B4DFL0\_HUMAN

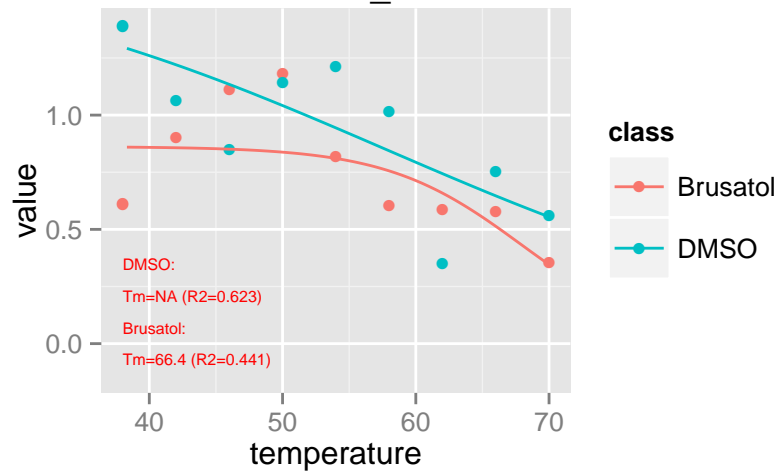

Prot: B4DM45\_HUMAN

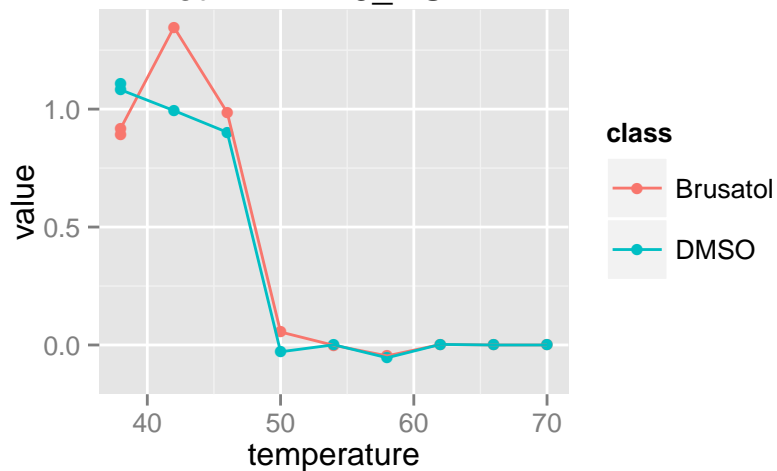

Prot: B4DMY3\_HUMAN

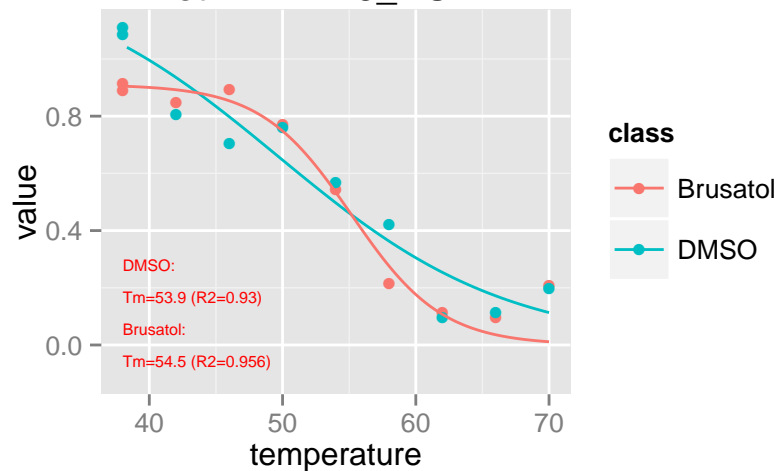

Prot: B4DNH1\_HUMAN

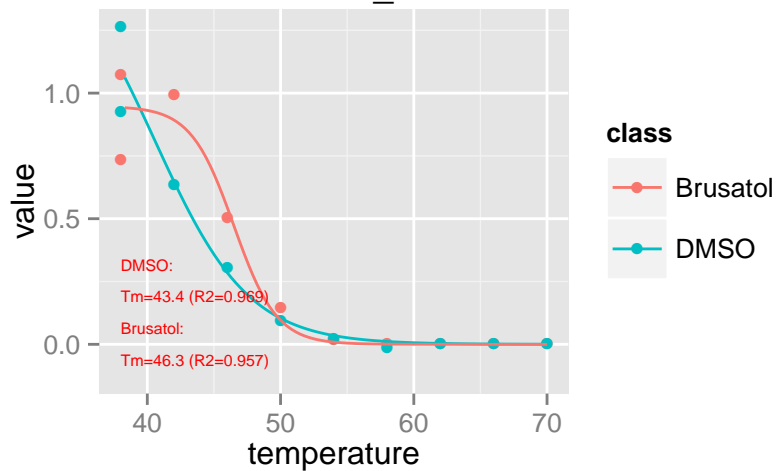

Prot: B4DRT3\_HUMAN

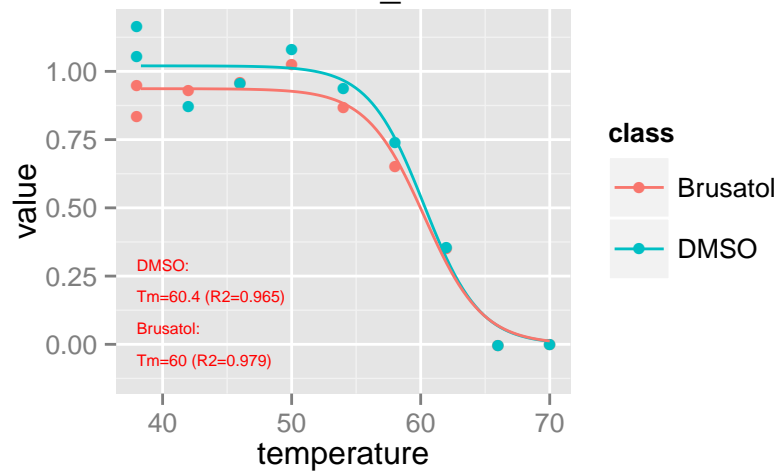

Prot: B4DWL1\_HUMAN

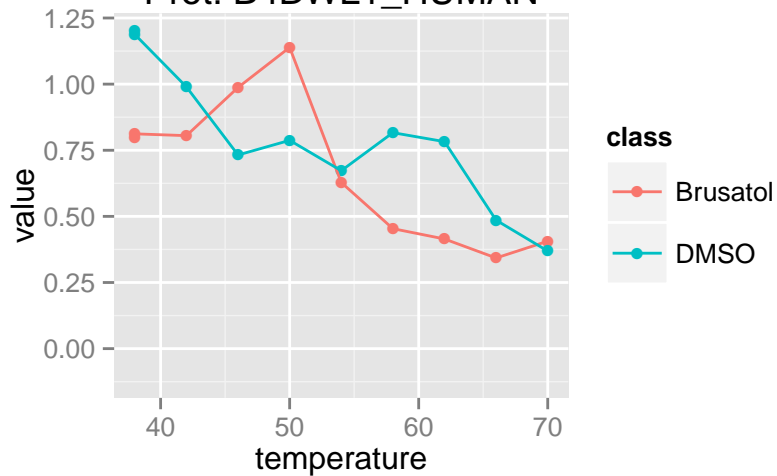

Prot: B4DYG5\_HUMAN

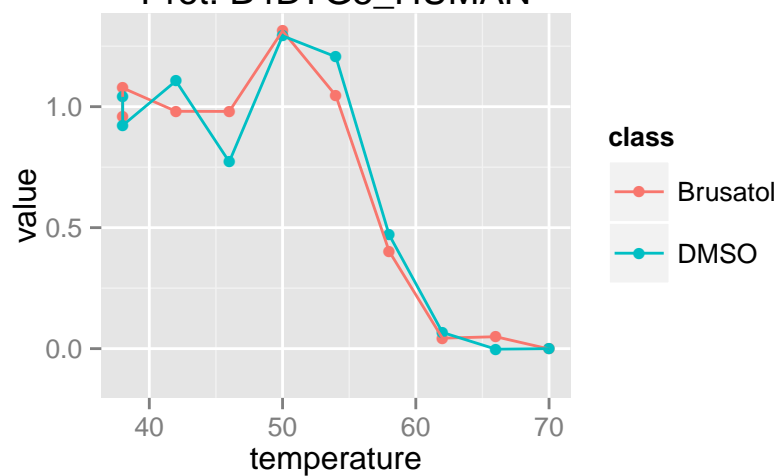

Prot: B4E2P4\_HUMAN

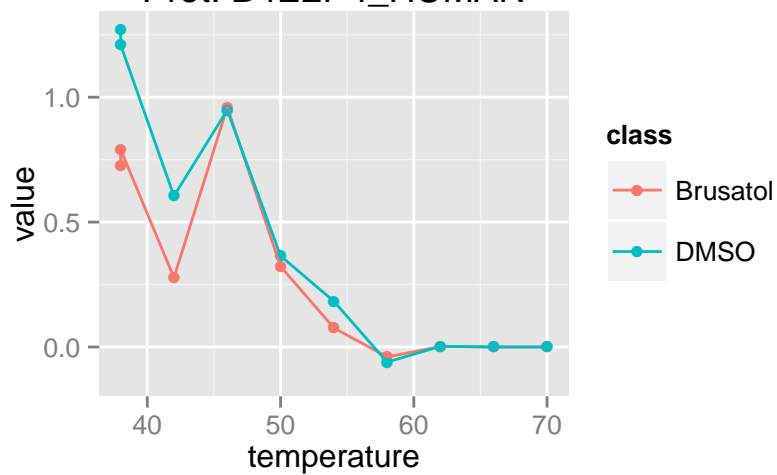

Prot: B4E3B6\_HUMAN

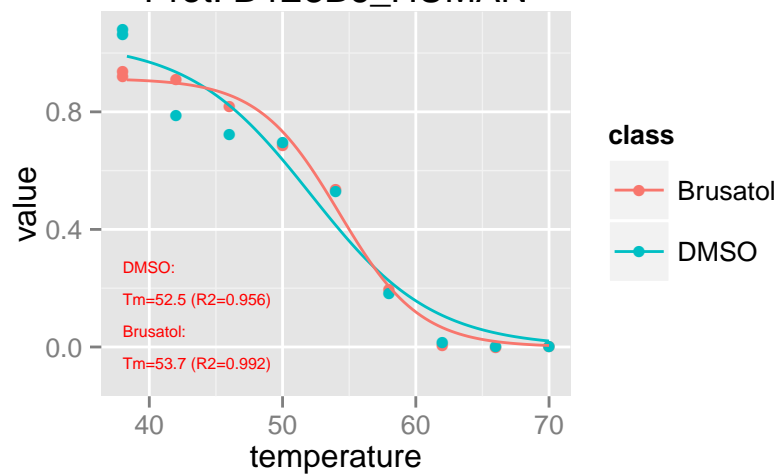

Prot: B7SBB1\_HUMAN

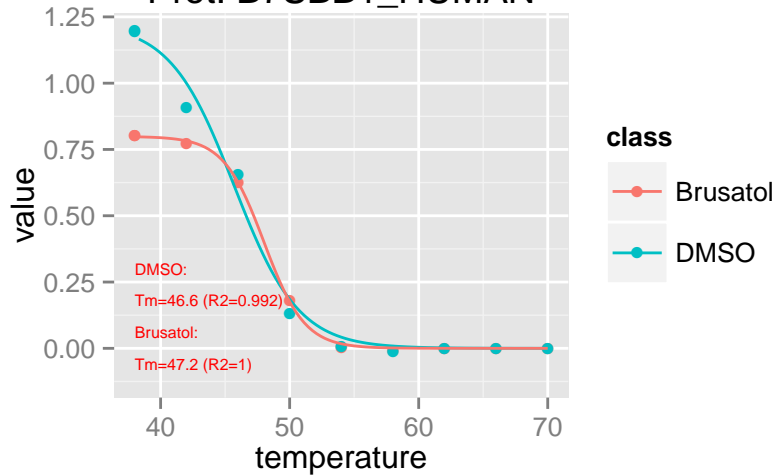

Prot: B7Z213\_HUMAN

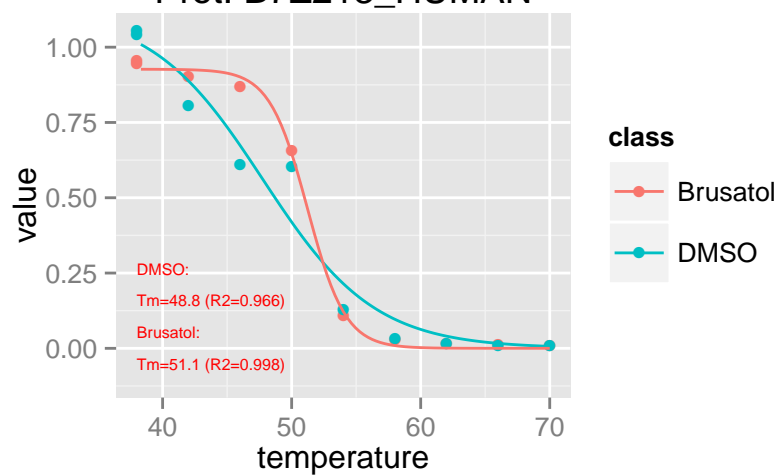

Prot: B7Z468\_HUMAN

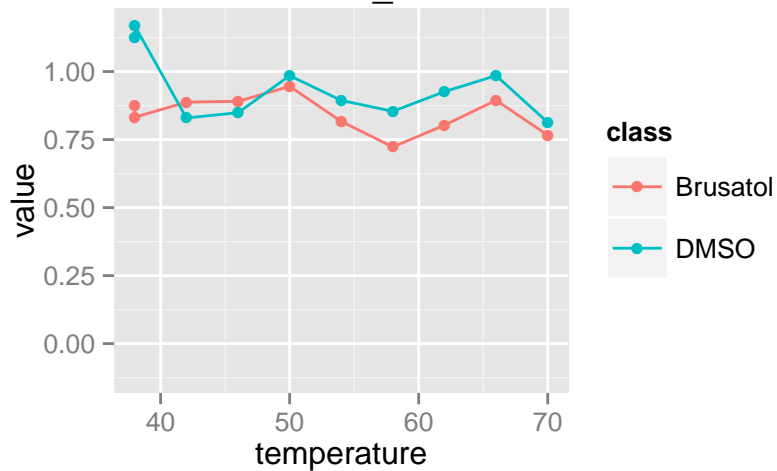

Prot: B7Z481\_HUMAN

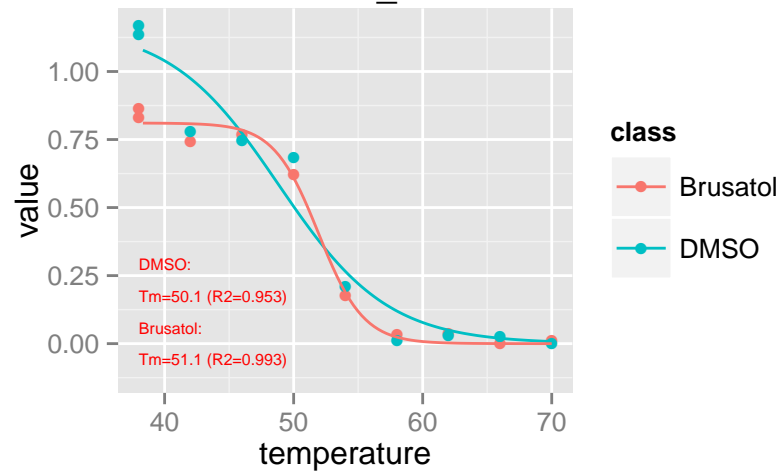

Prot: B7Z596\_HUMAN

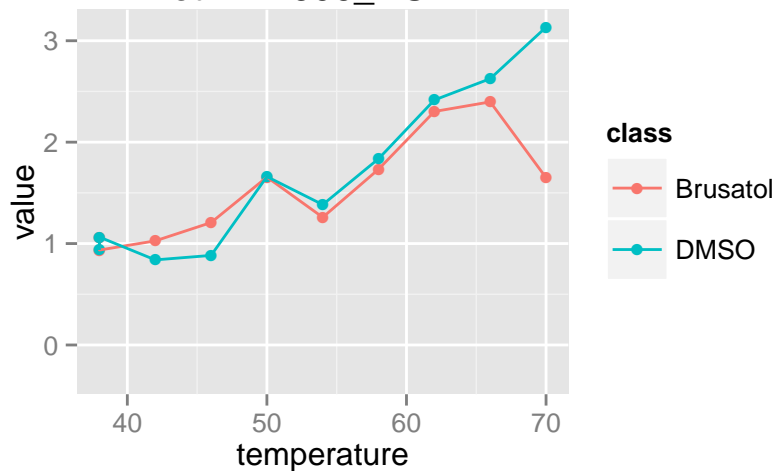

Prot: BABA1\_HUMAN

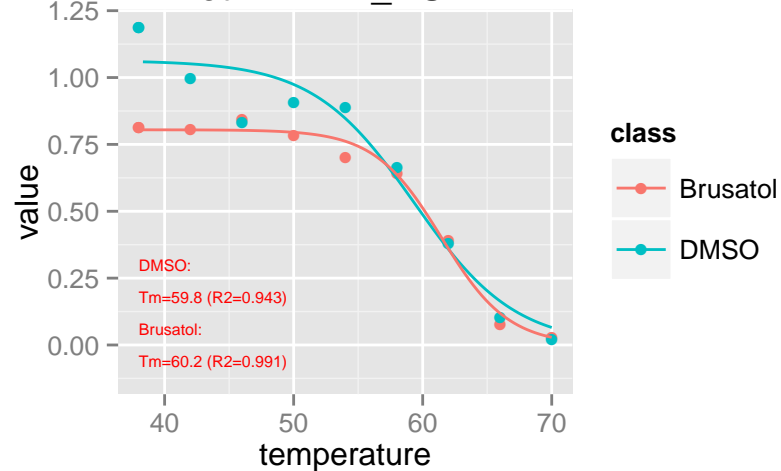

Prot: BACH\_HUMAN

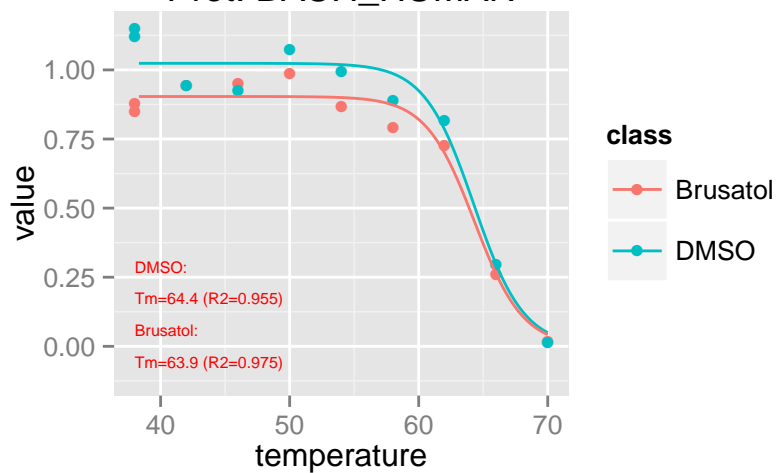

Prot: BAD\_HUMAN

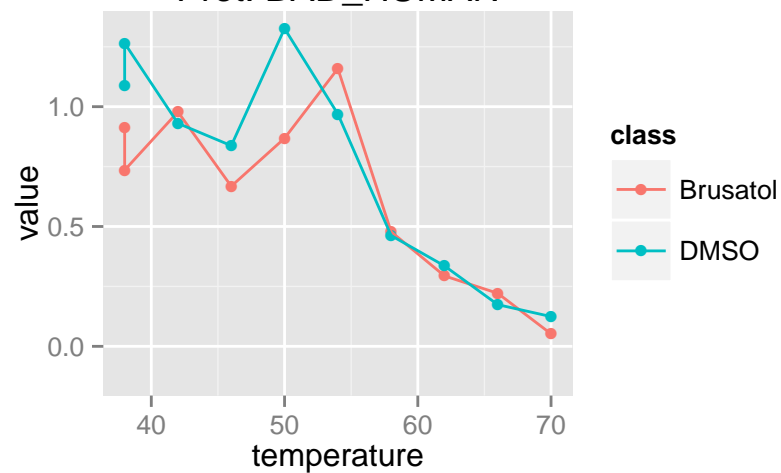

Prot: BAF\_HUMAN

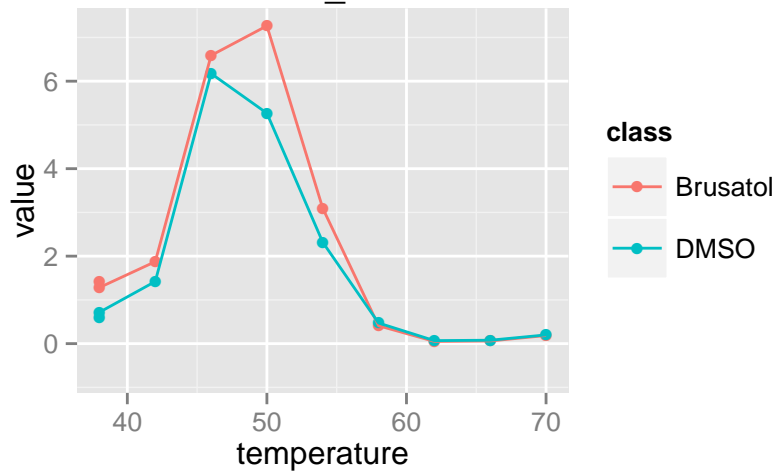

Prot: BAG2\_HUMAN

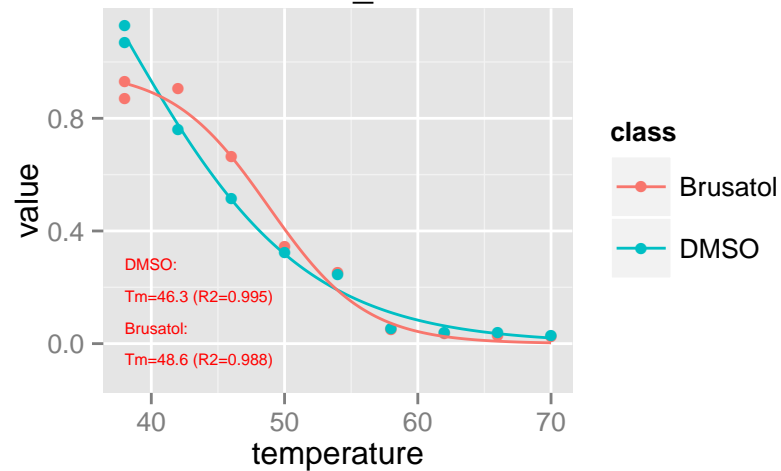

Prot: BAG3\_HUMAN

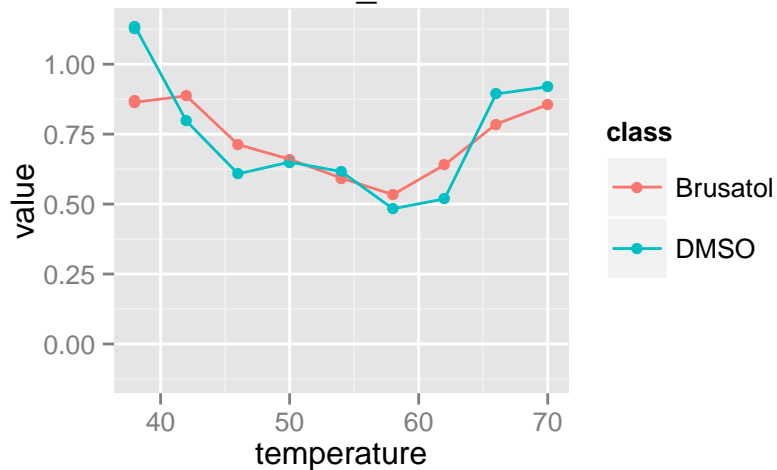

Prot: BAG4\_HUMAN

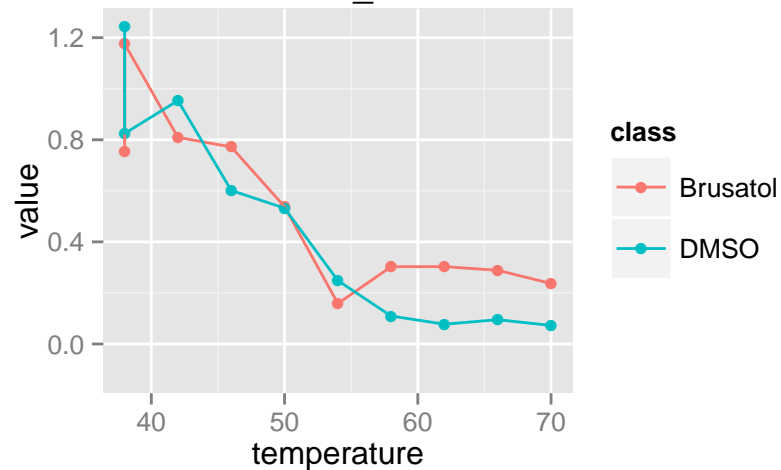

Prot: BAG5\_HUMAN

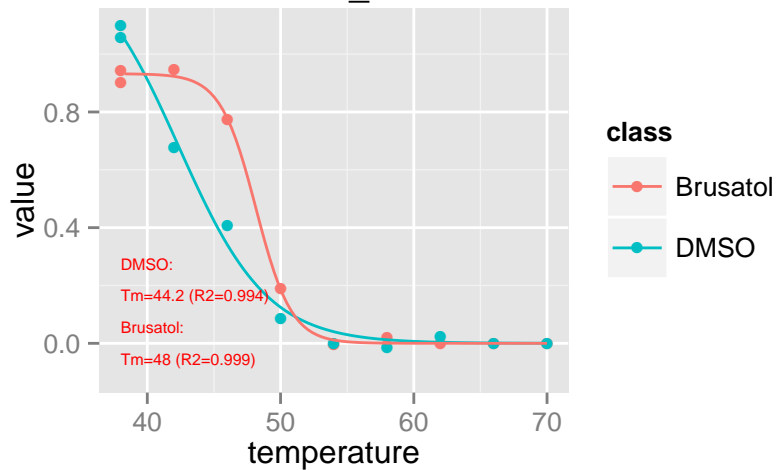

Prot: BAG6\_HUMAN

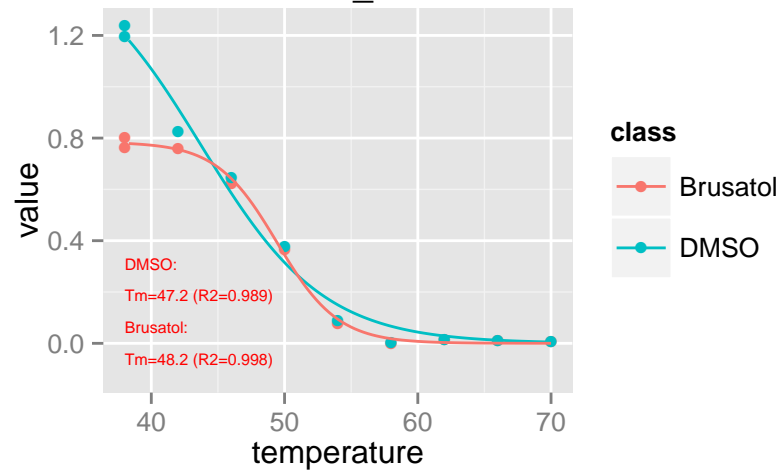

Prot: BAIP2\_HUMAN

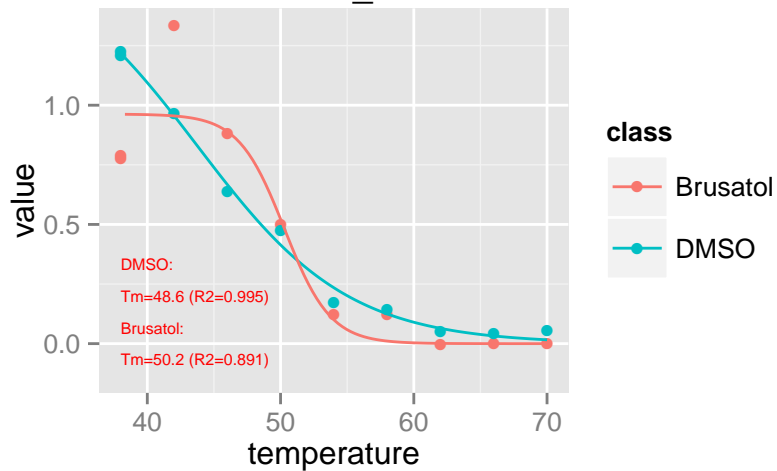

Prot: BAP18\_HUMAN

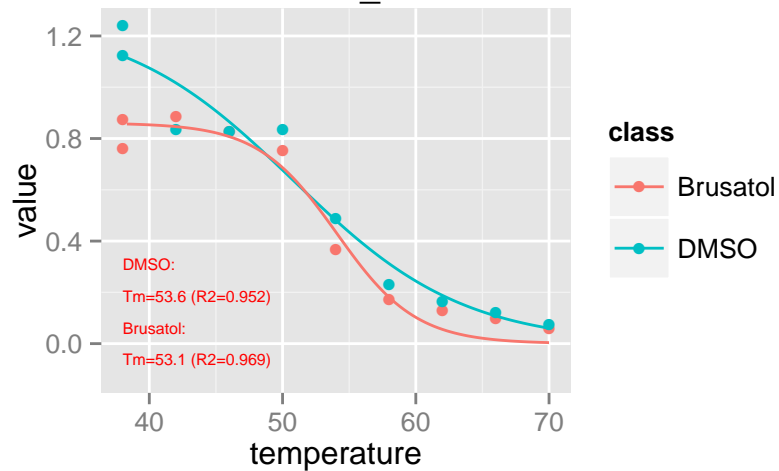

Prot: BAP31\_HUMAN

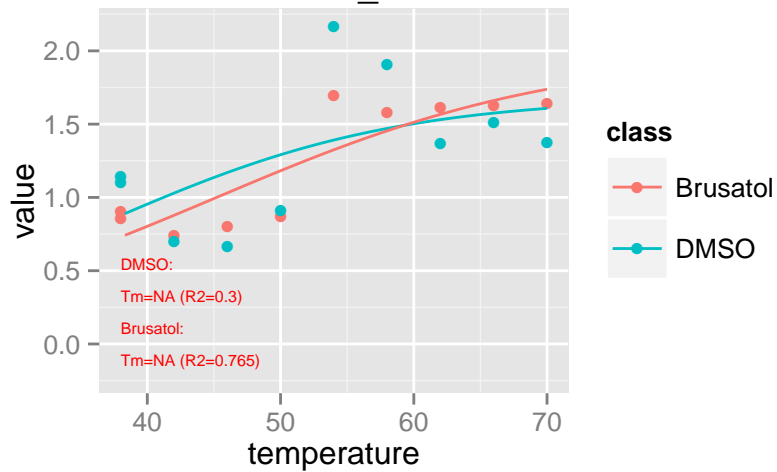

Prot: BASI\_HUMAN

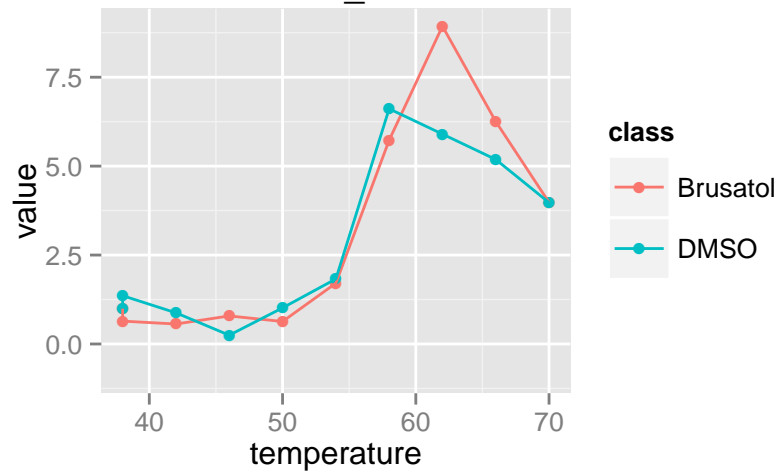

Prot: BASP1\_HUMAN

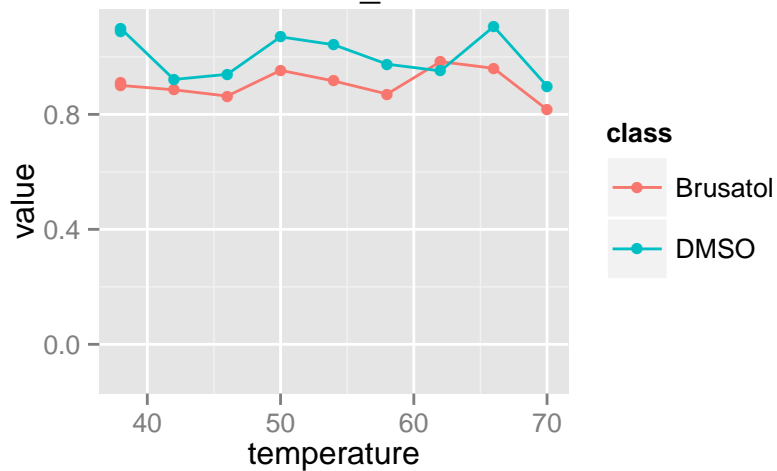

Prot: BAX\_HUMAN

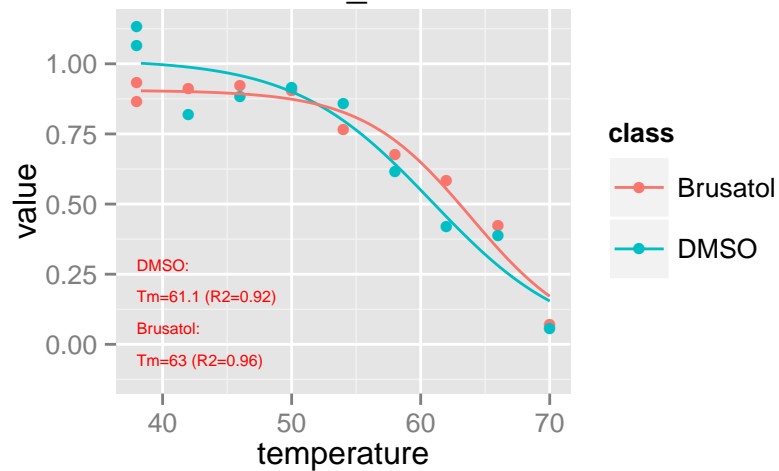

Prot: BCAM\_HUMAN

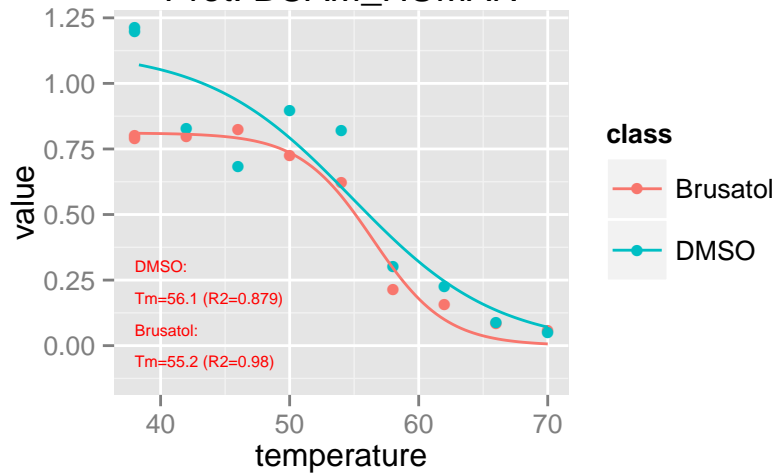

Prot: BCAR1\_HUMAN

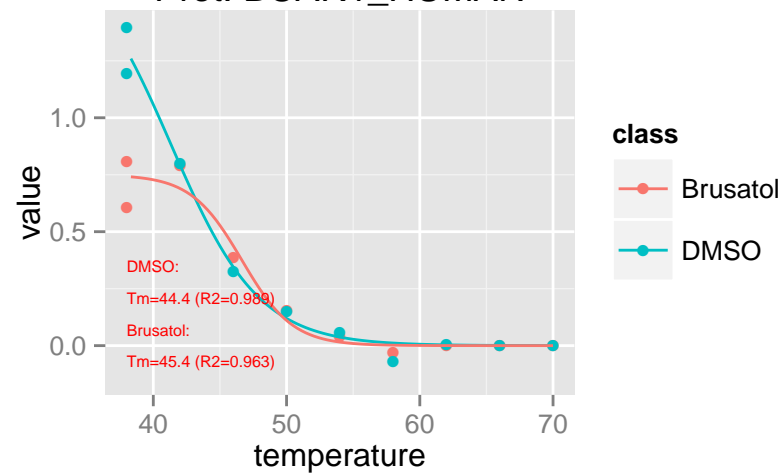

Prot: BCAS1\_HUMAN

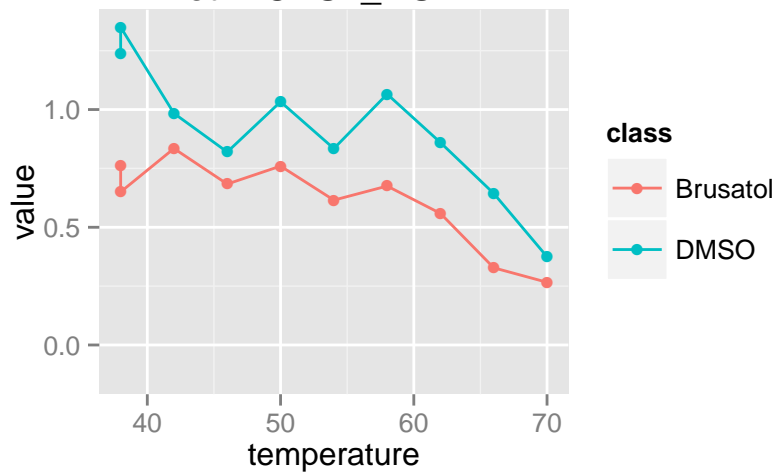

Prot: BCAT2\_HUMAN

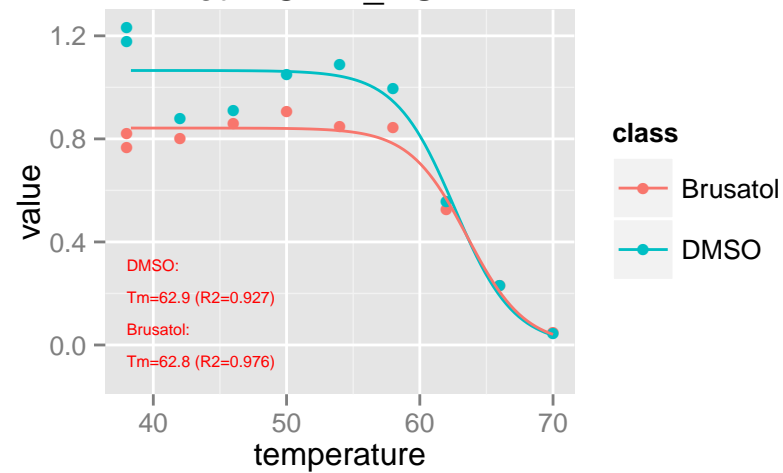

Prot: BCCIP\_HUMAN

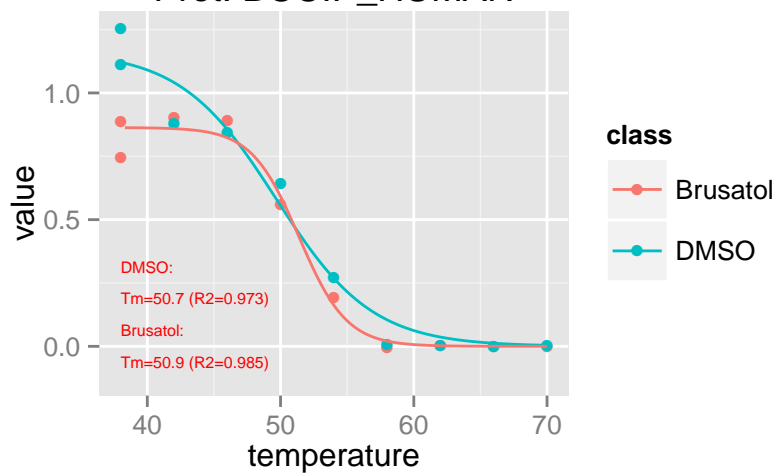

Prot: BCL10\_HUMAN

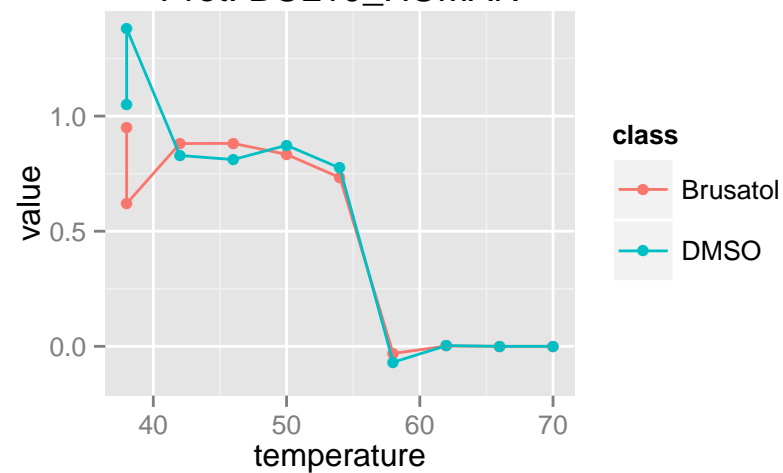



Prot: BCL7B\_HUMAN

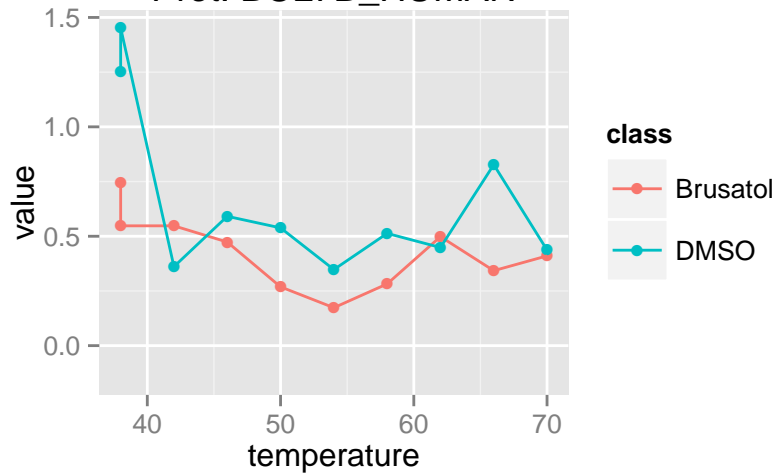

Prot: BCL9L\_HUMAN

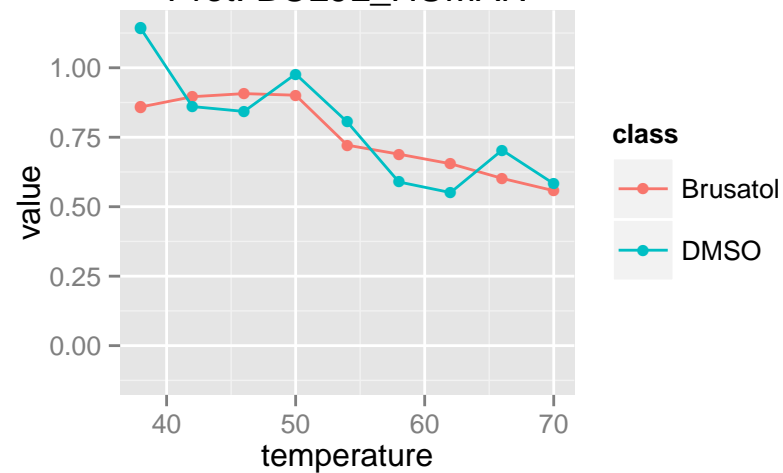

Prot: BCLF1\_HUMAN

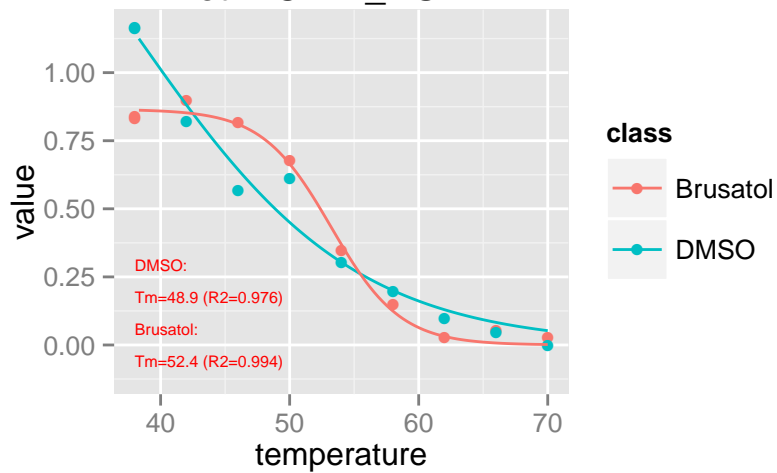

Prot: BDH2\_HUMAN

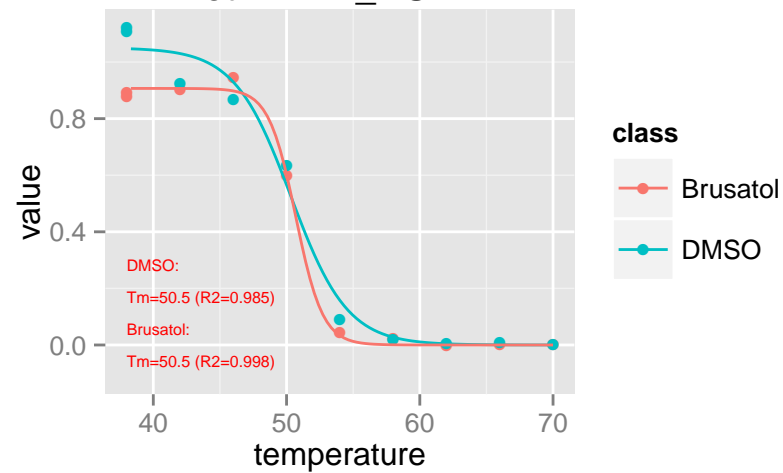

Prot: BGAL\_HUMAN

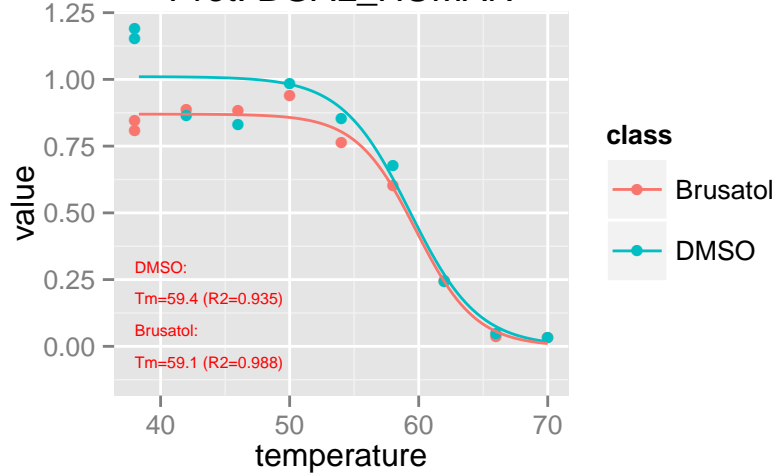

Prot: BI2L1\_HUMAN

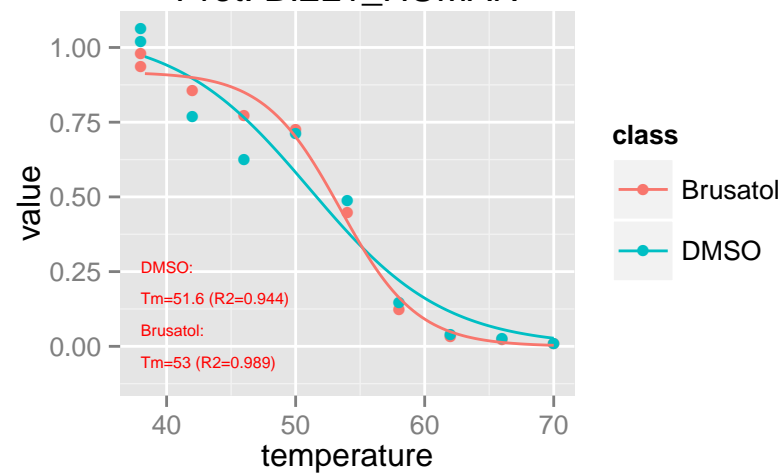

Prot: BICC1\_HUMAN

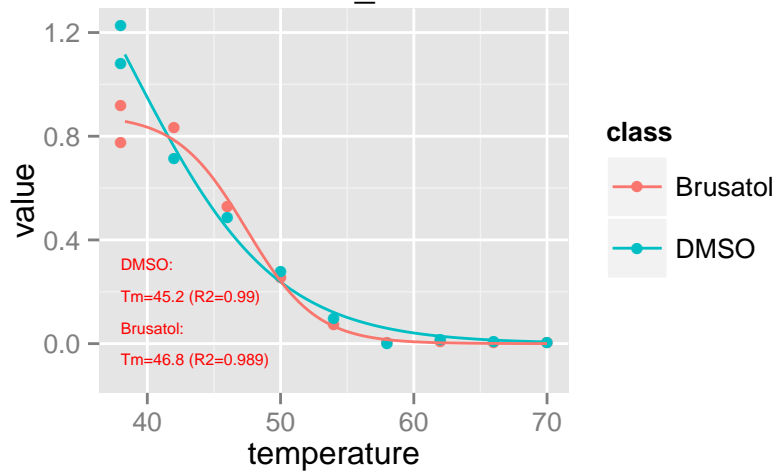

Prot: BICD2\_HUMAN

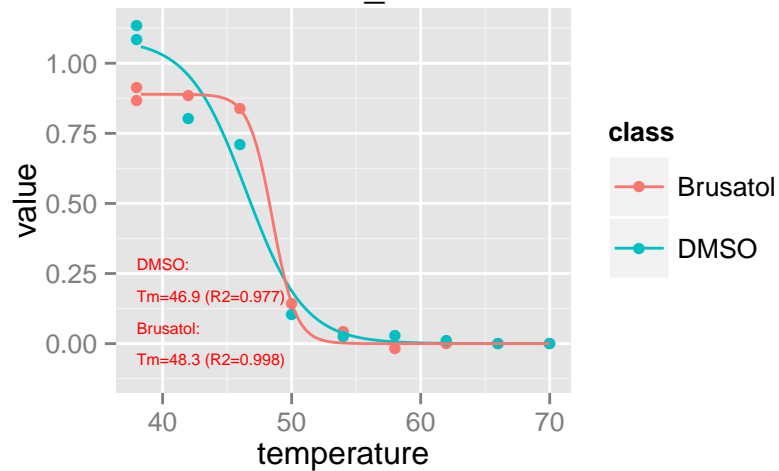

Prot: BID\_HUMAN

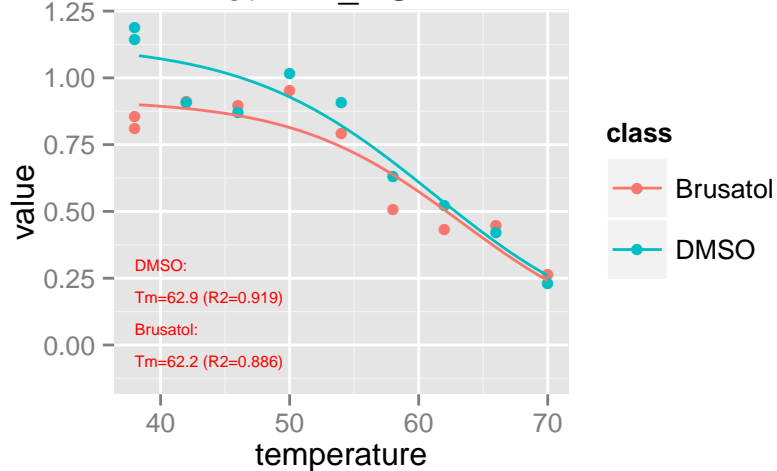

Prot: BIEA\_HUMAN

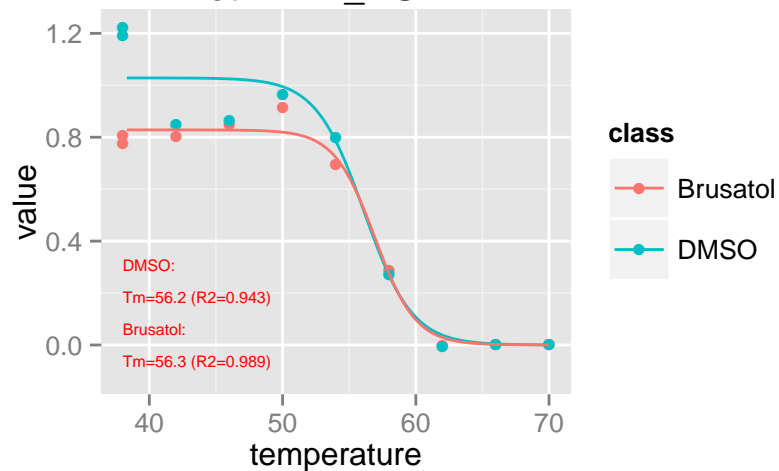

Prot: BIG1\_HUMAN

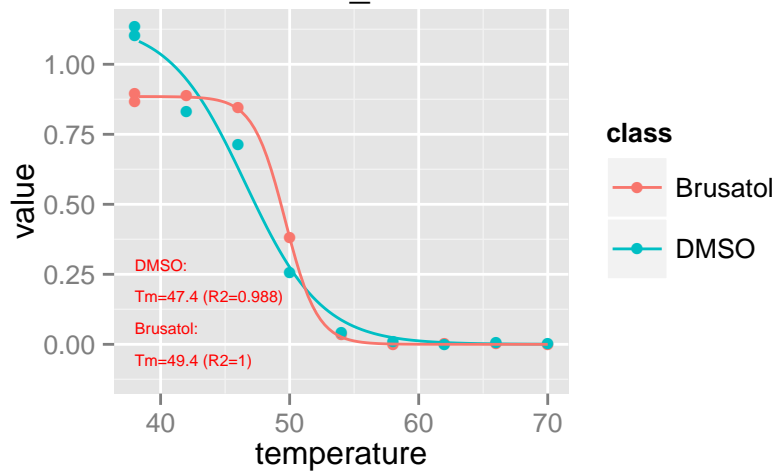

Prot: BIG2\_HUMAN

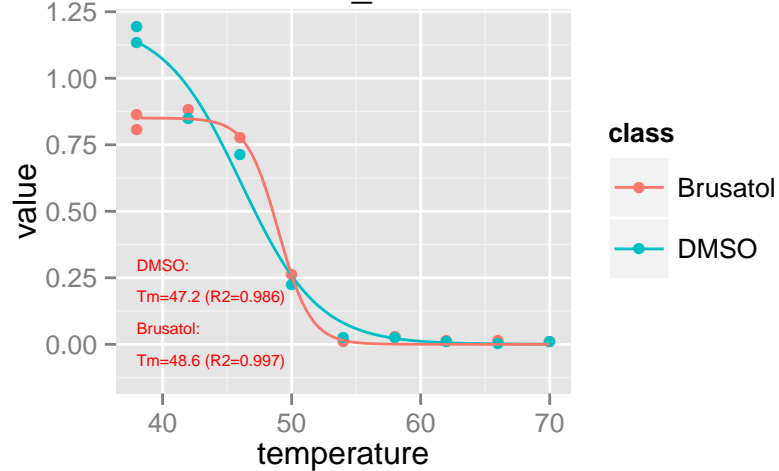

Prot: BIN1\_HUMAN

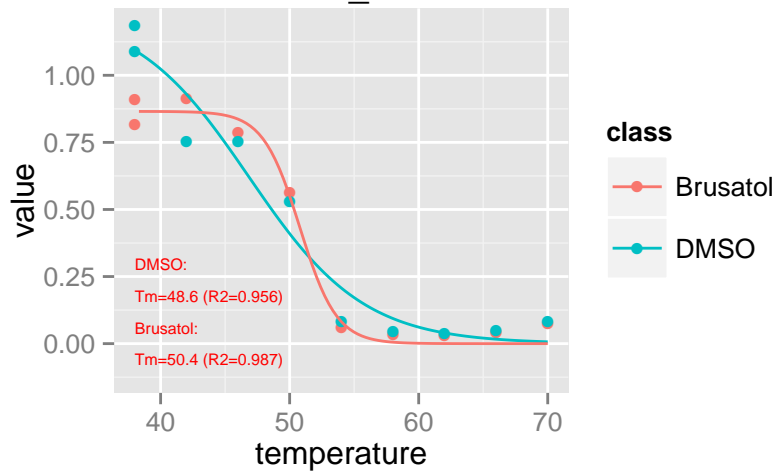

Prot: BIRC6\_HUMAN

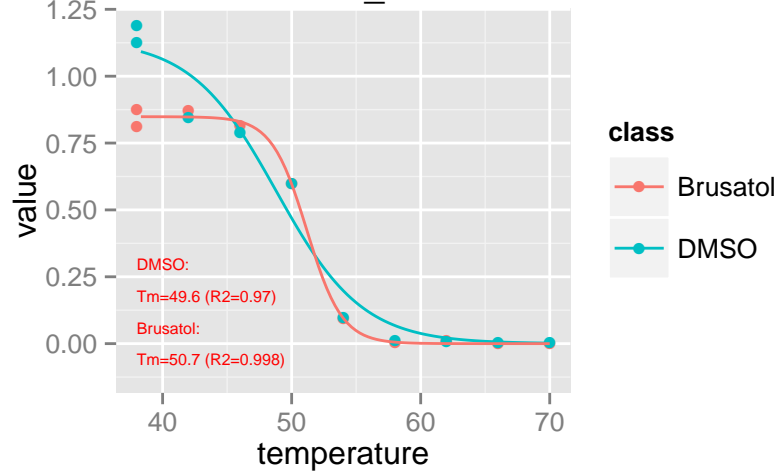

Prot: BL1S2\_HUMAN

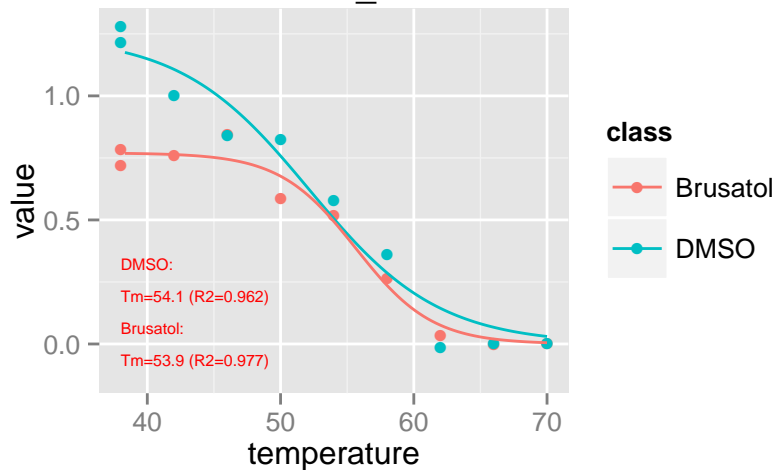

Prot: BLMH\_HUMAN

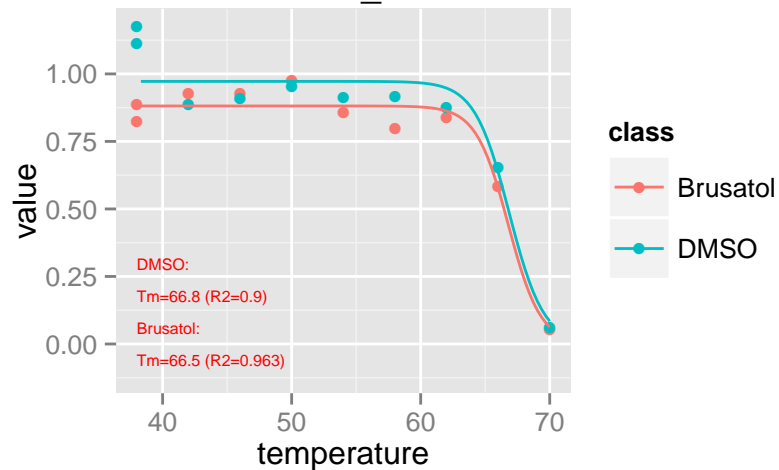

Prot: BLVRB\_HUMAN

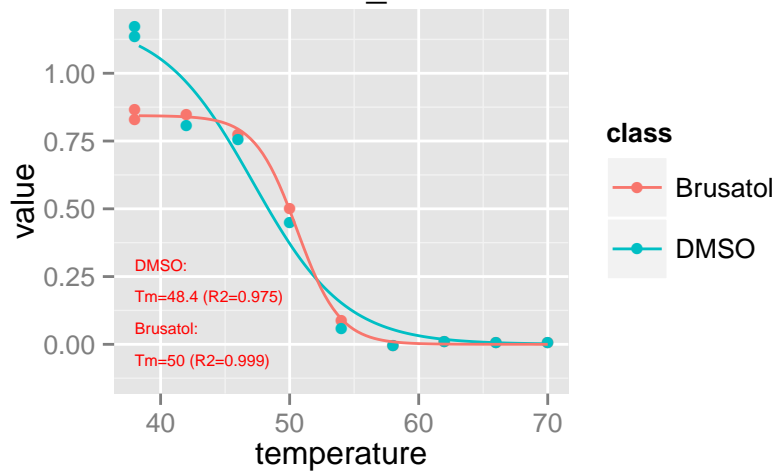

Prot: BOD1\_HUMAN

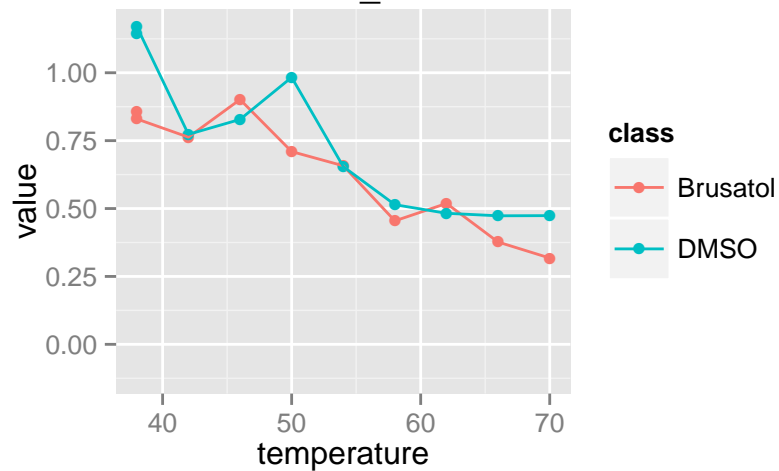

Prot: BOD1L\_HUMAN

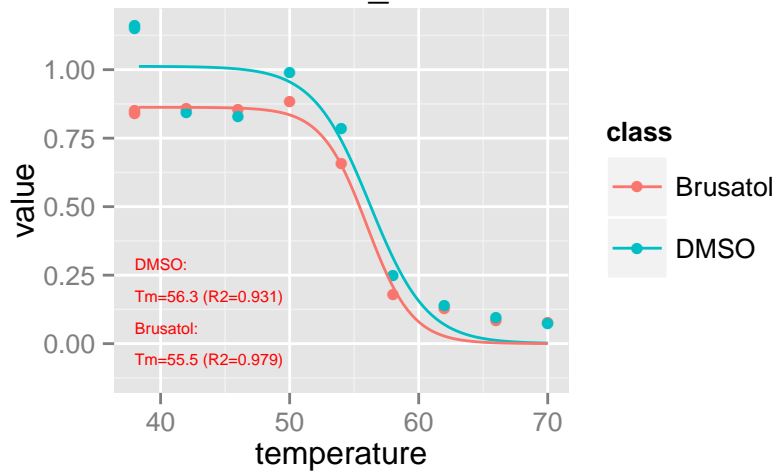

Prot: BOLA1\_HUMAN

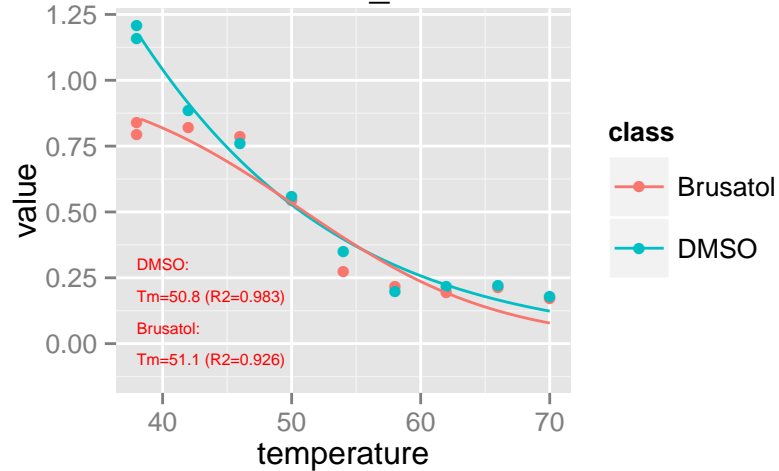

Prot: BOLA2\_HUMAN

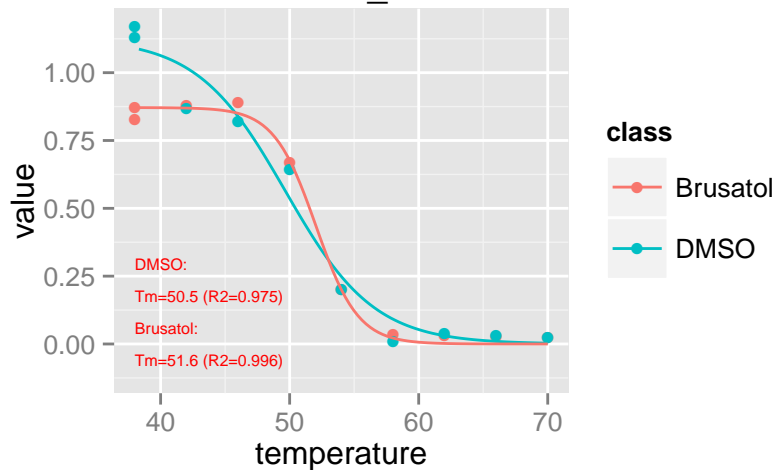

Prot: BOLA3\_HUMAN

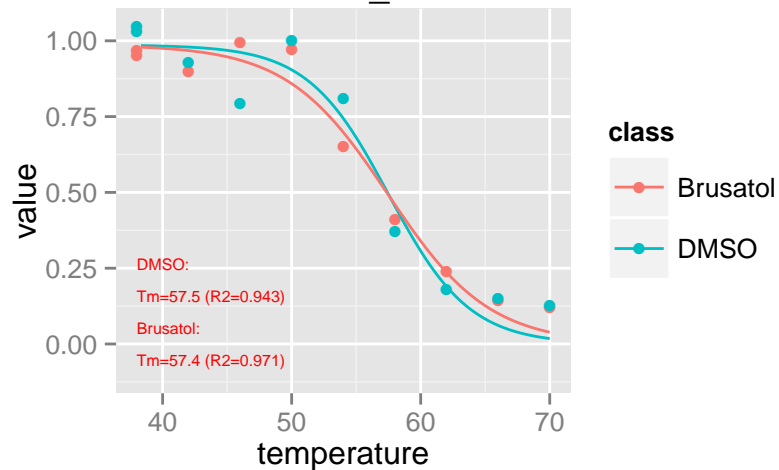

Prot: BOP1\_HUMAN

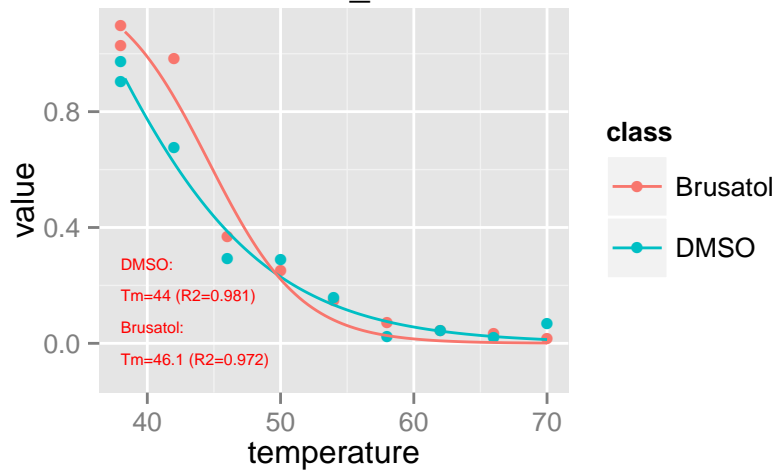

Prot: BORG4\_HUMAN

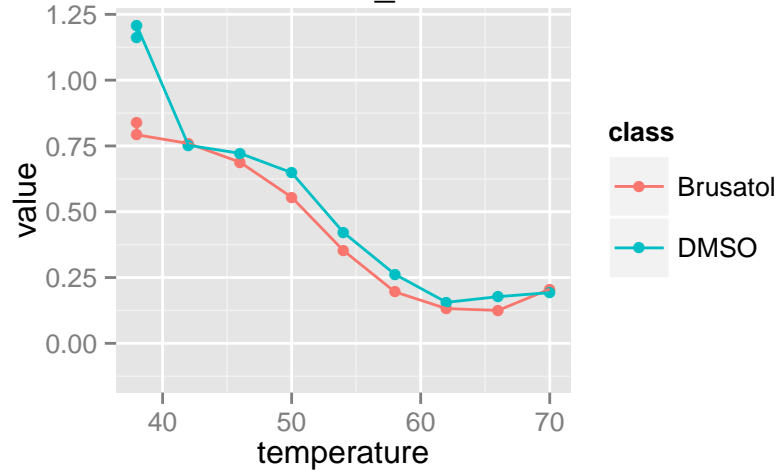

Prot: BPNT1\_HUMAN

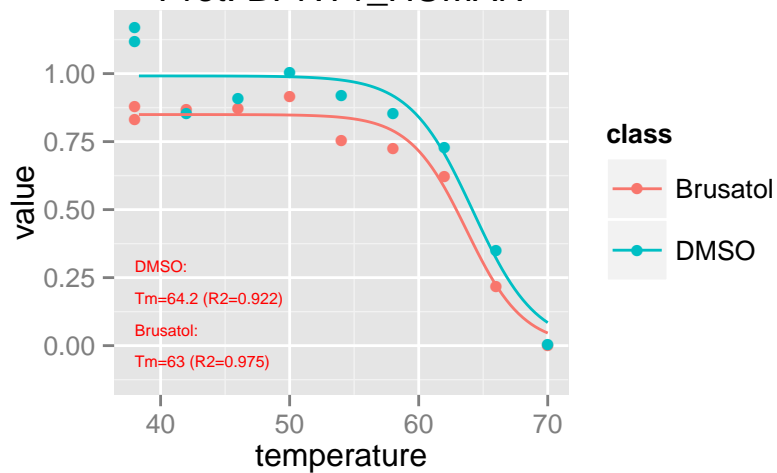

Prot: BPTF\_HUMAN

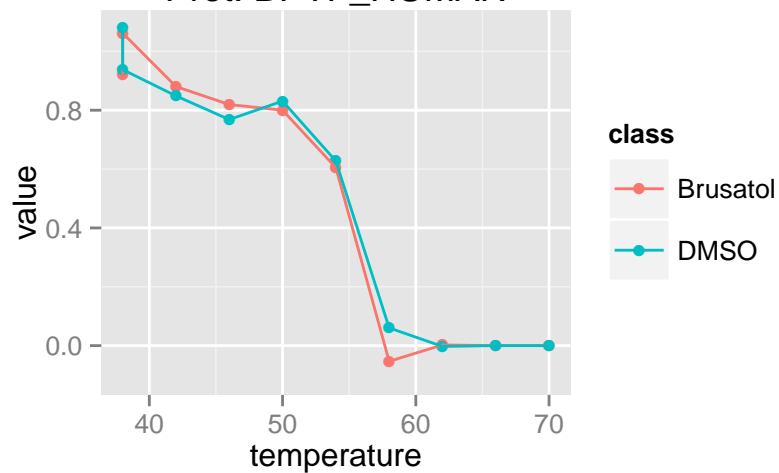

Prot: BRAP\_HUMAN

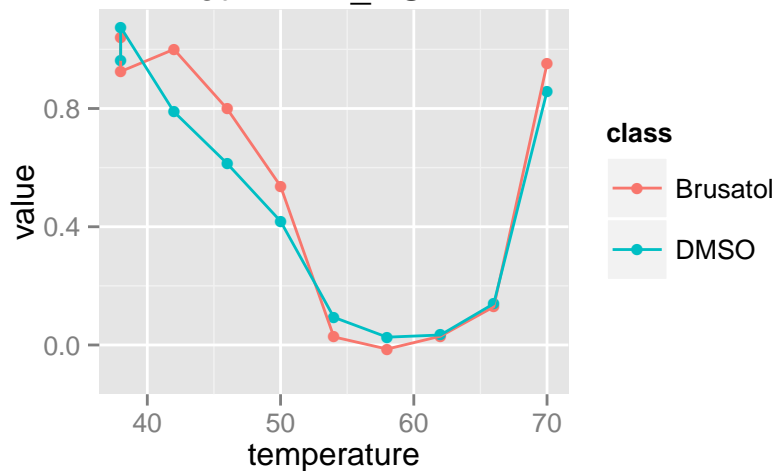

Prot: BRAT1\_HUMAN

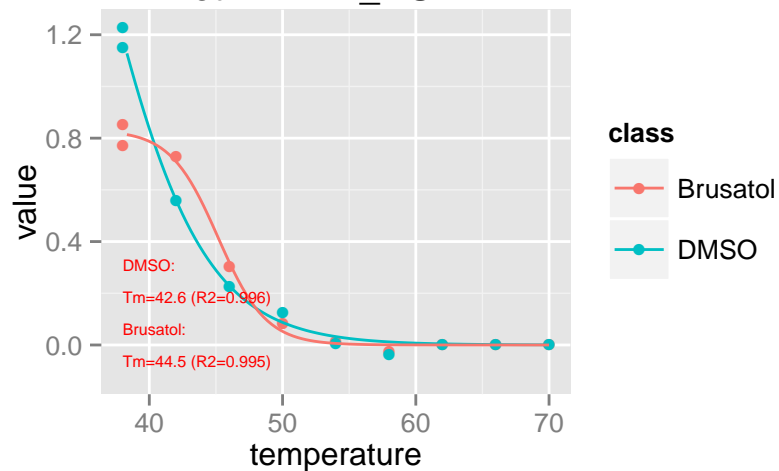

Prot: BRCC3\_HUMAN

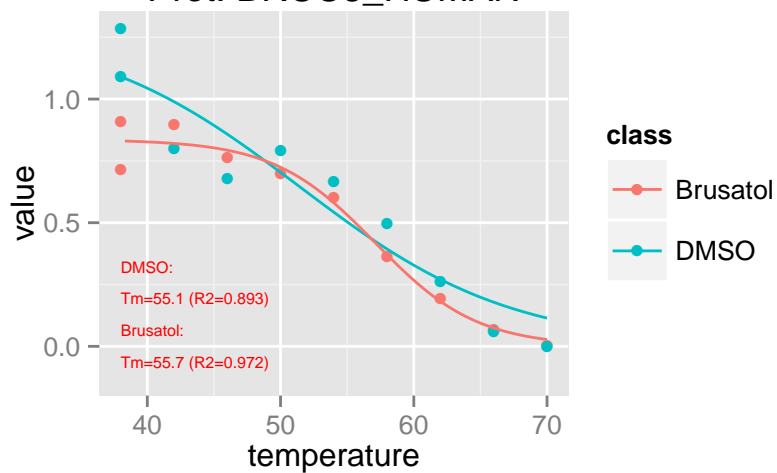

Prot: BRD4\_HUMAN

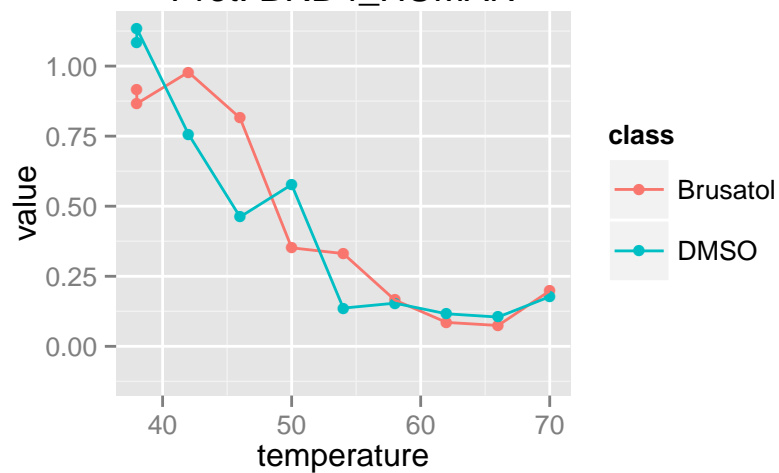

Prot: BRD8\_HUMAN

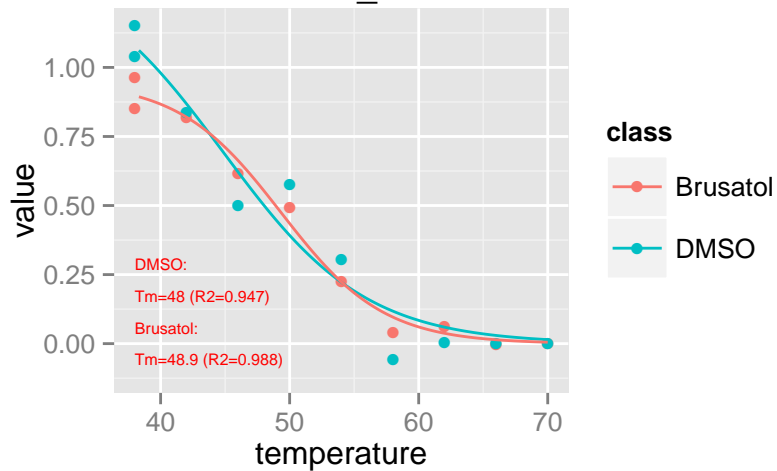

Prot: BRE\_HUMAN

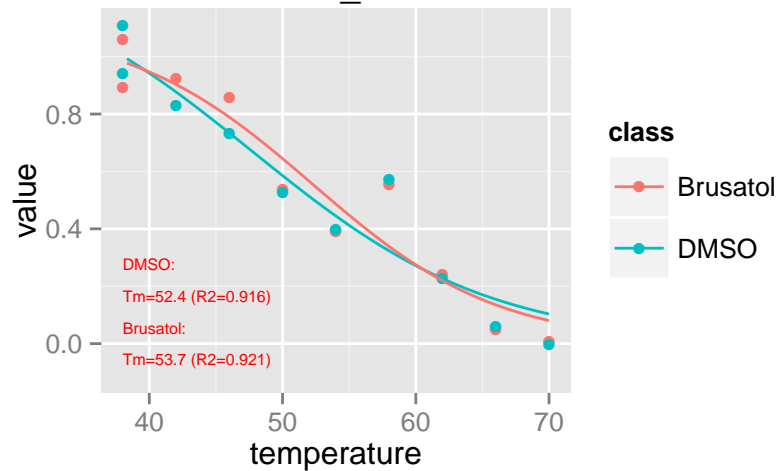

Prot: BRE1A\_HUMAN

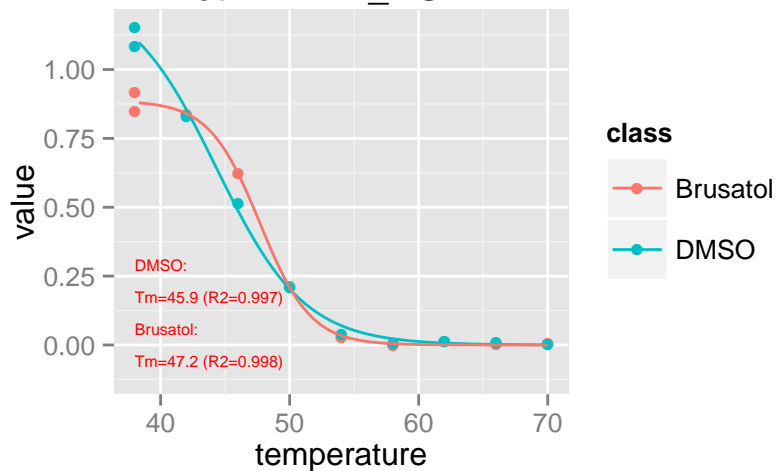

Prot: BRE1B\_HUMAN

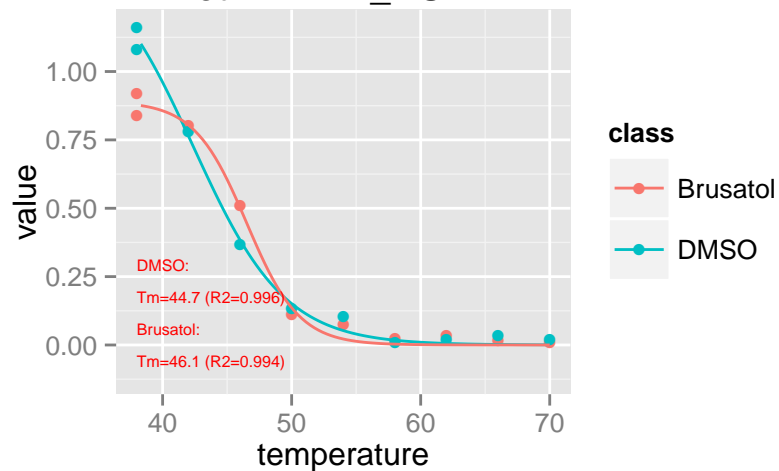

Prot: BRK1\_HUMAN

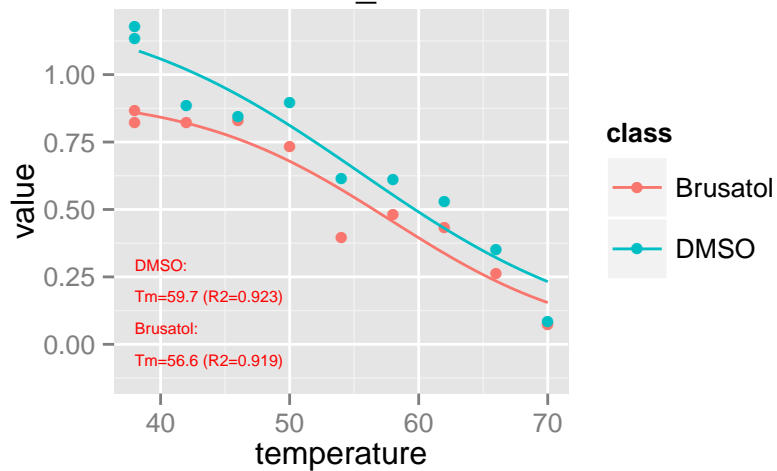

Prot: BROX\_HUMAN

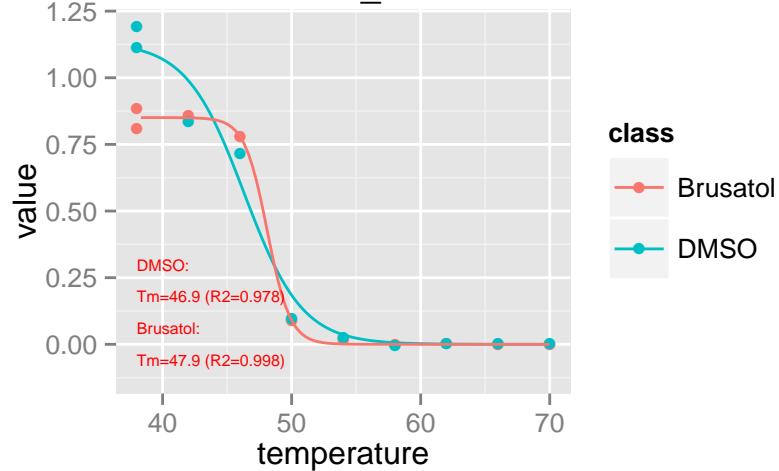

Prot: BT3L4\_HUMAN

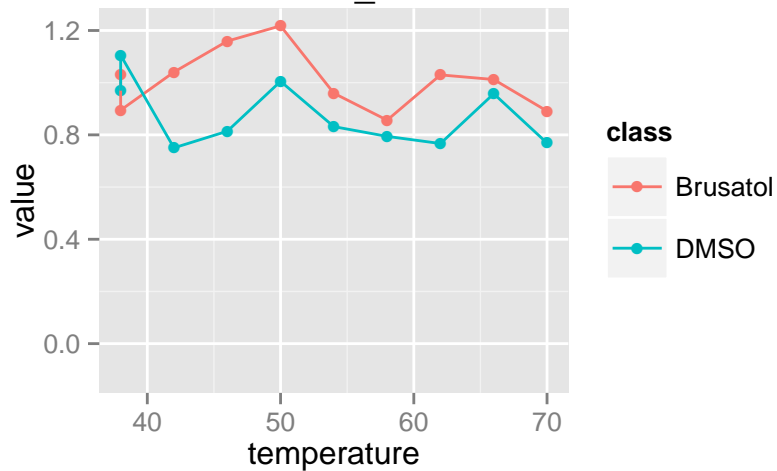

Prot: BTAF1\_HUMAN

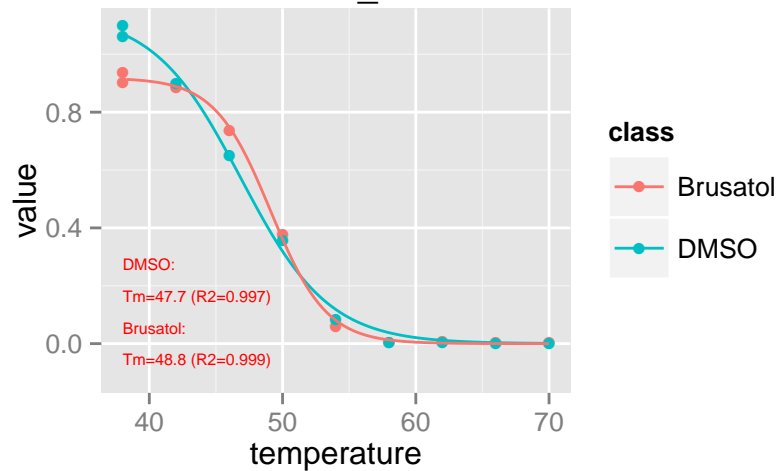

Prot: BTBDB\_HUMAN

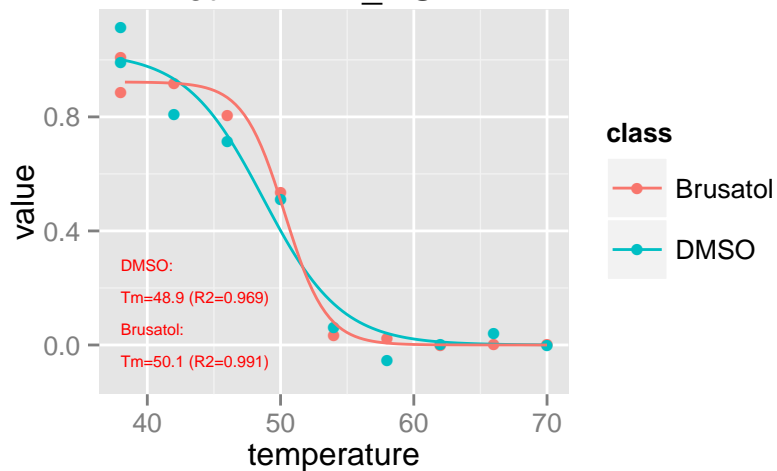

Prot: BTF3\_HUMAN

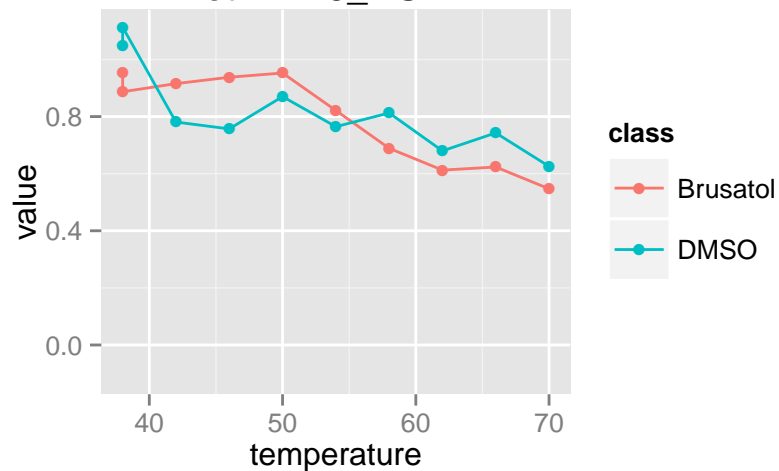

Prot: BUB3\_HUMAN

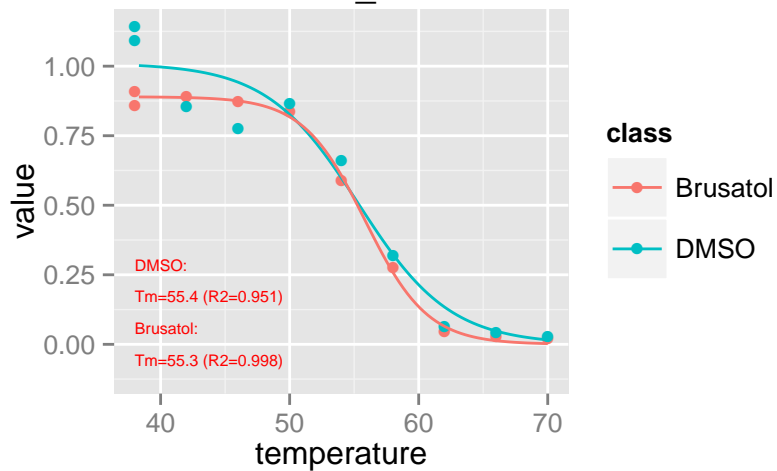

Prot: BUD31\_HUMAN

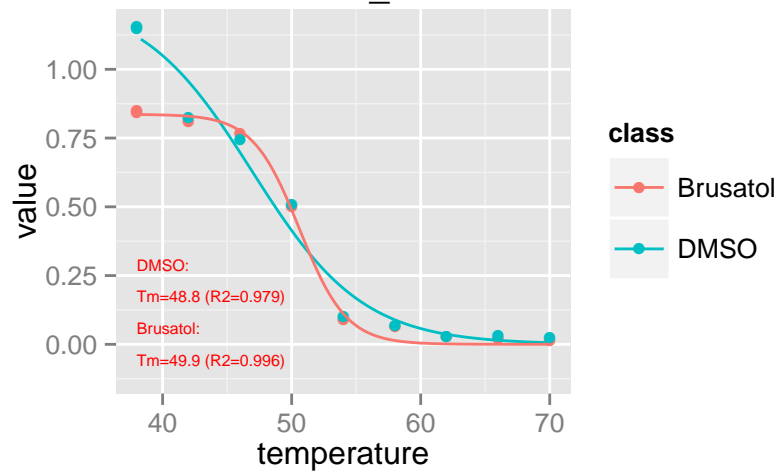

Prot: BYST\_HUMAN

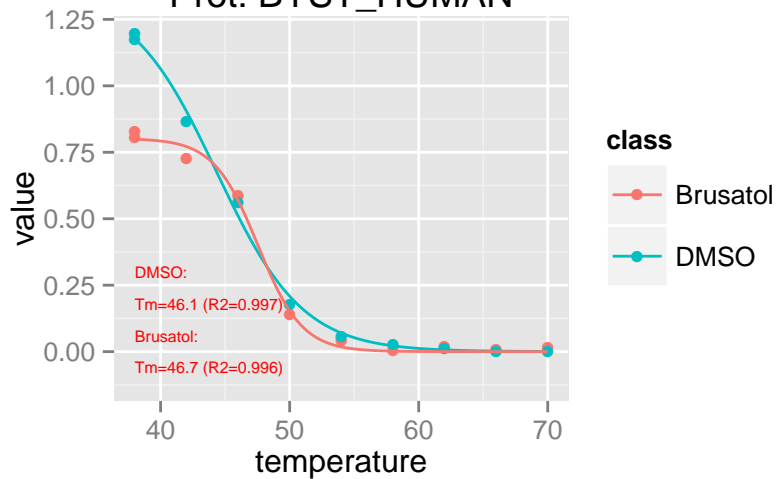

Prot: BZW1\_HUMAN

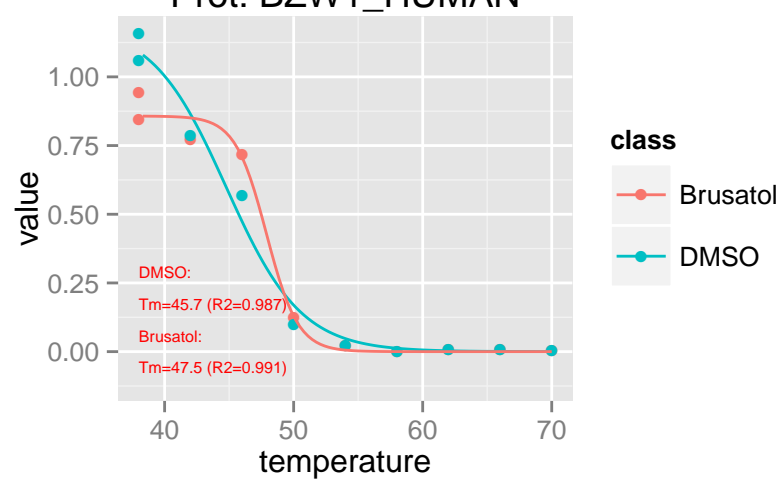

Prot: BZW2\_HUMAN

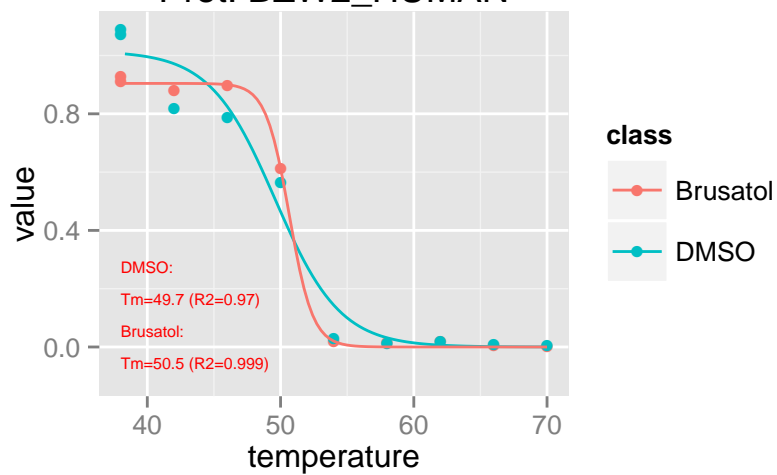

Prot: C10\_HUMAN

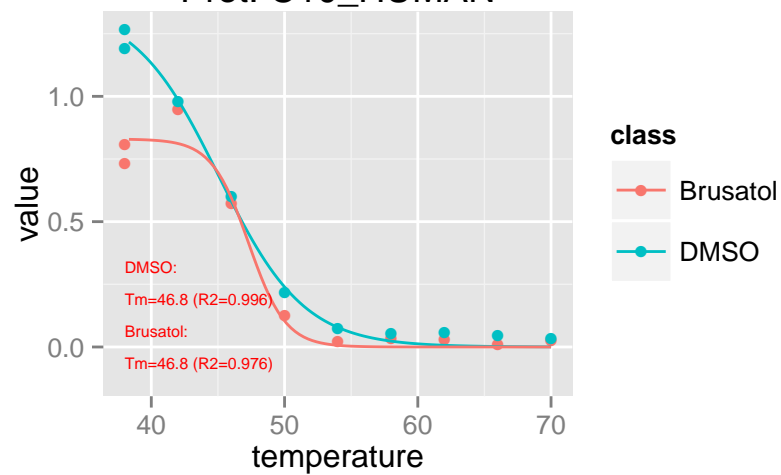

Prot: C19L1\_HUMAN

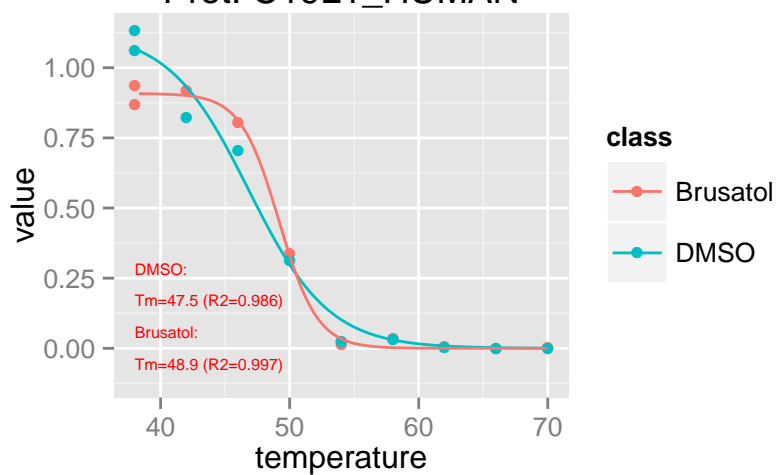

Prot: C1QBP\_HUMAN

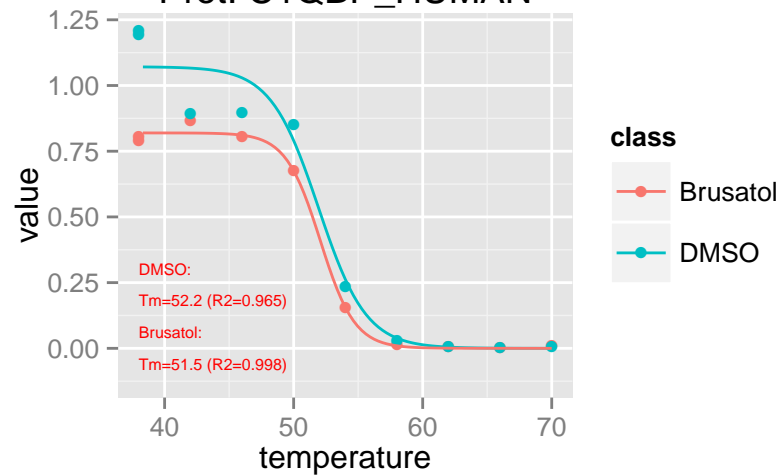



Prot: C1TC\_HUMAN

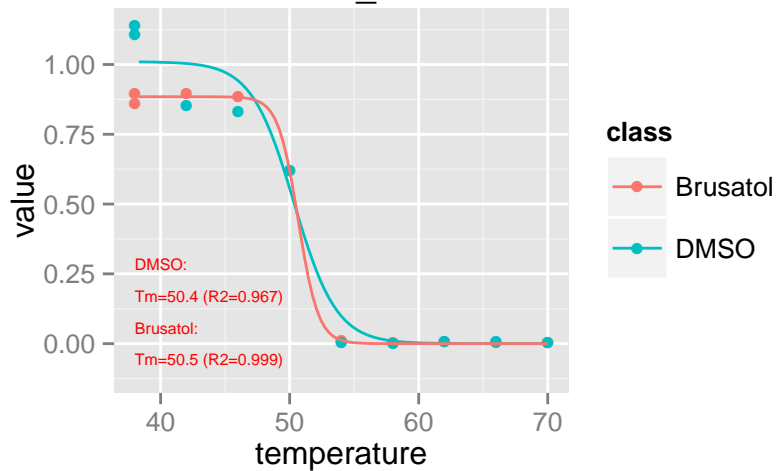

Prot: C1TM\_HUMAN

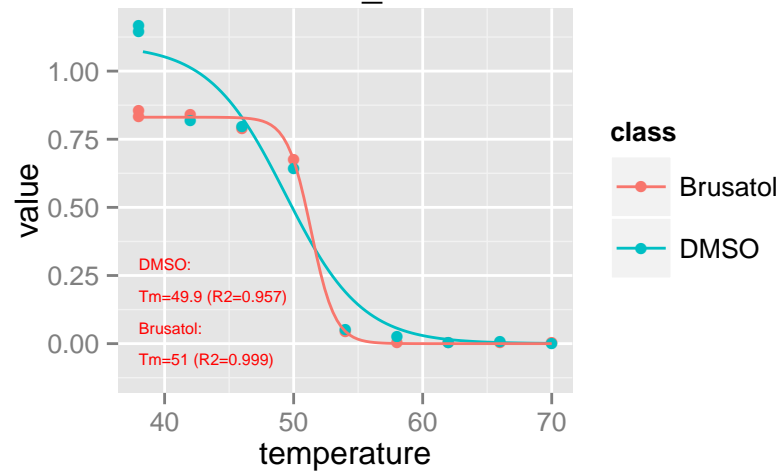

Prot: C2AIL\_HUMAN

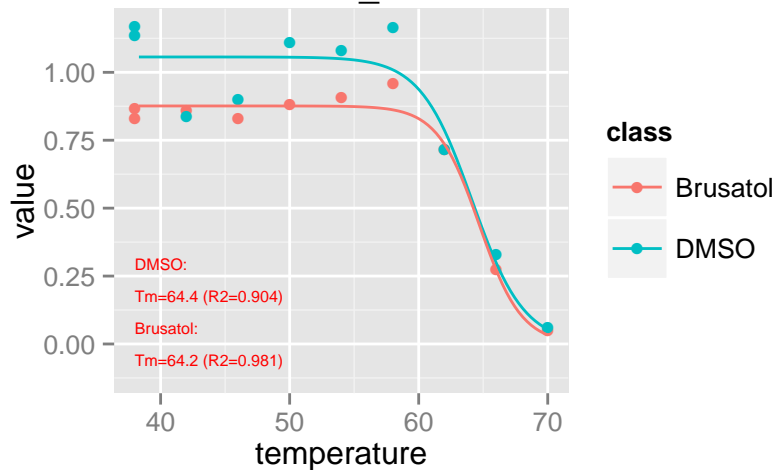

Prot: C2D1A\_HUMAN

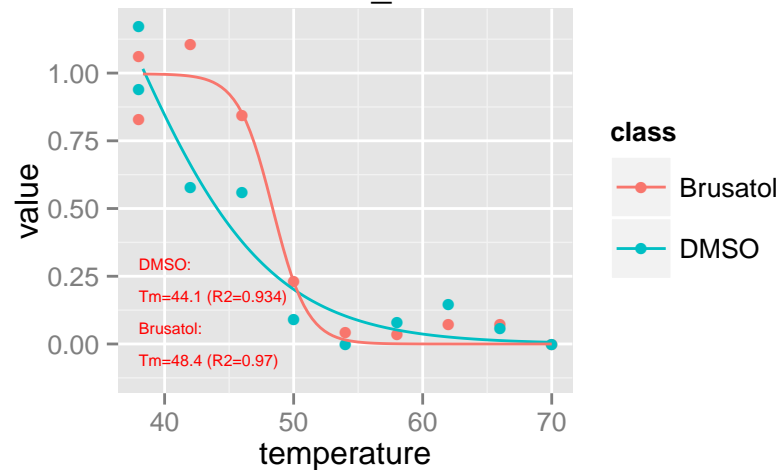

Prot: C43BP\_HUMAN

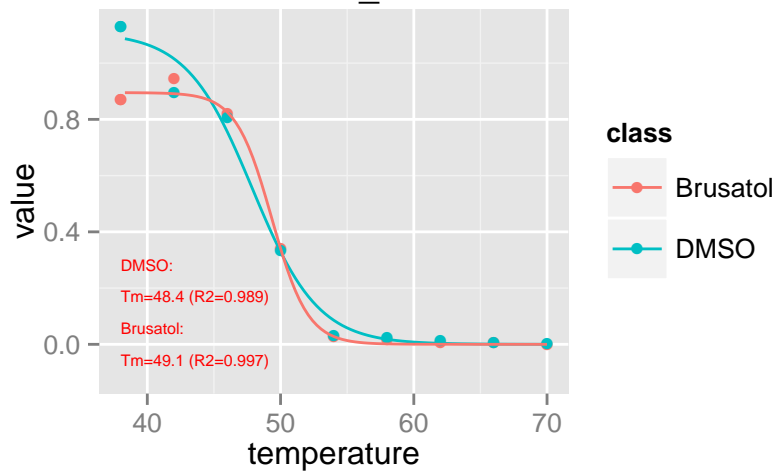

Prot: C7DJS2\_HUMAN

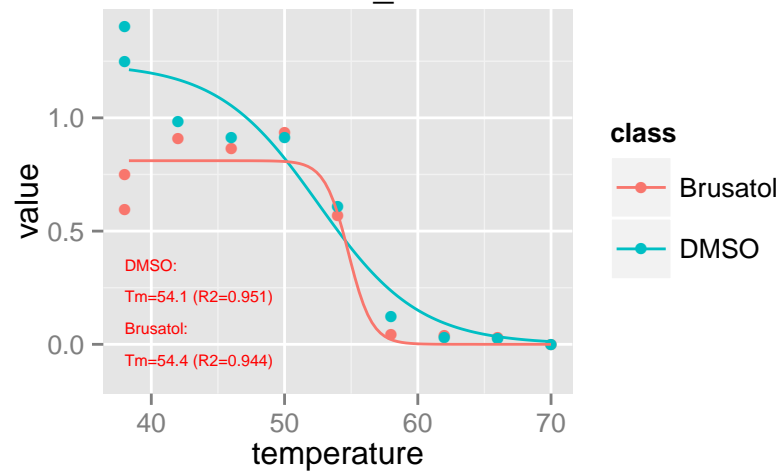

Prot: C9JCP4\_HUMAN

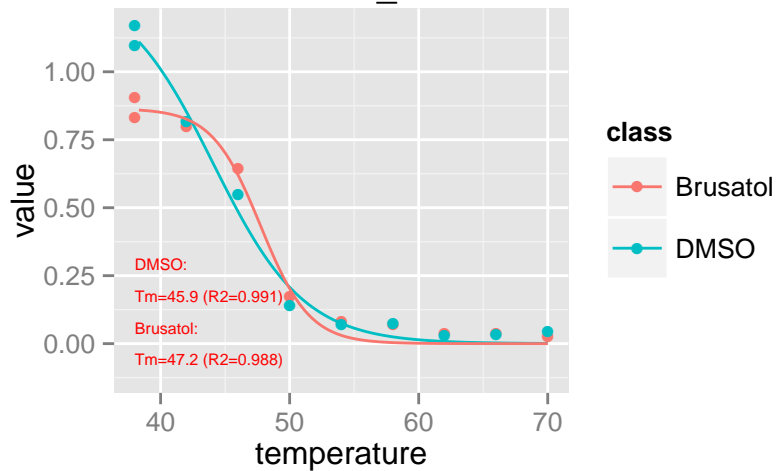

Prot: C9JFE4\_HUMAN

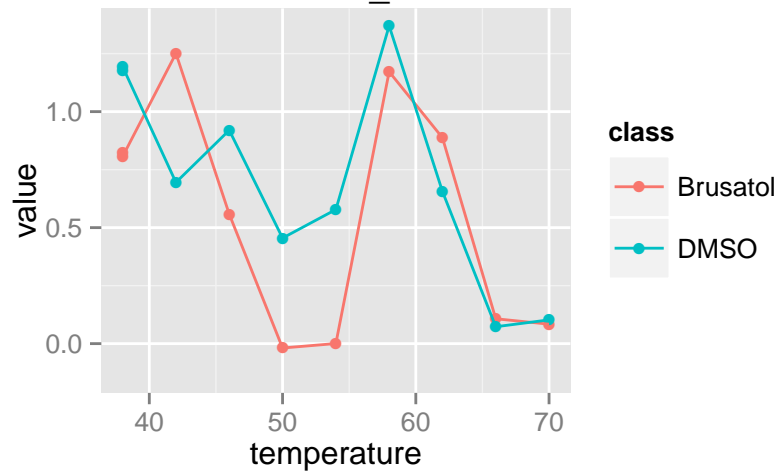

Prot: CA031\_HUMAN

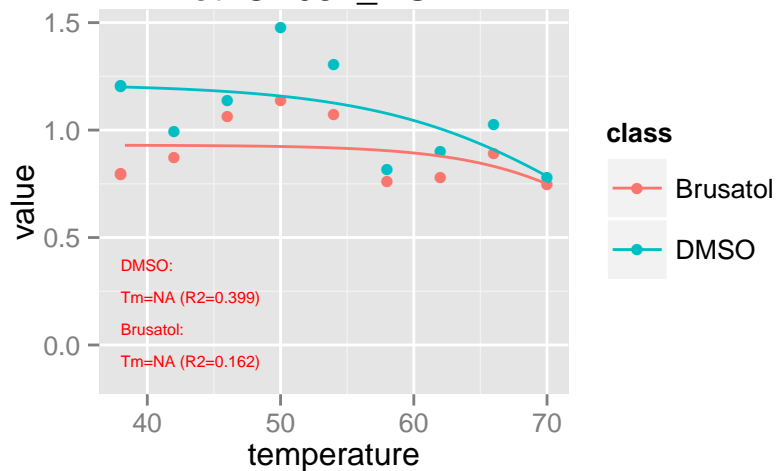

Prot: CA050\_HUMAN

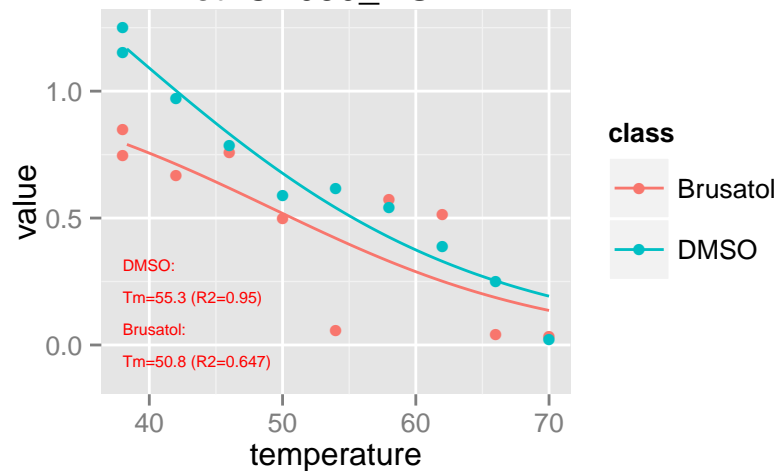

Prot: CA123\_HUMAN

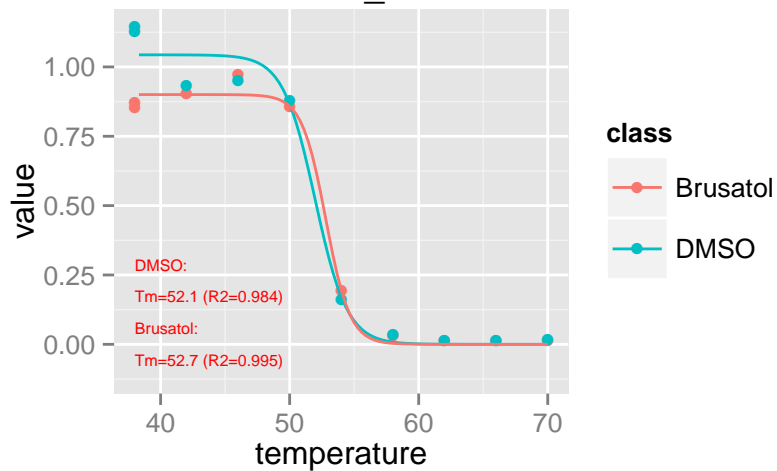

Prot: CA144\_HUMAN

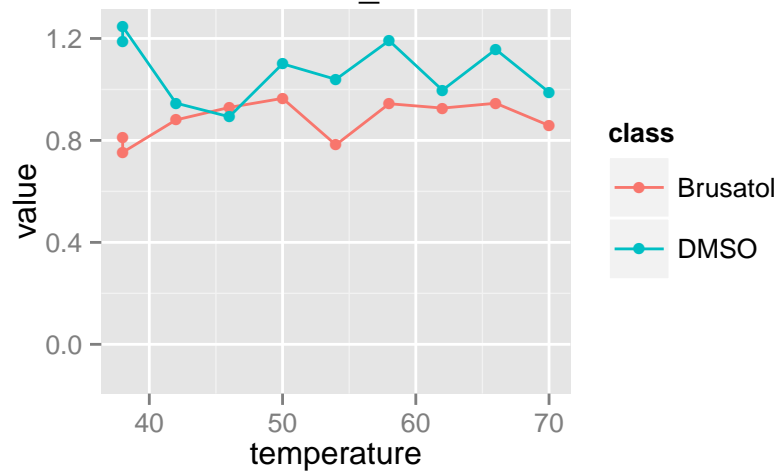

Prot: CAB39\_HUMAN

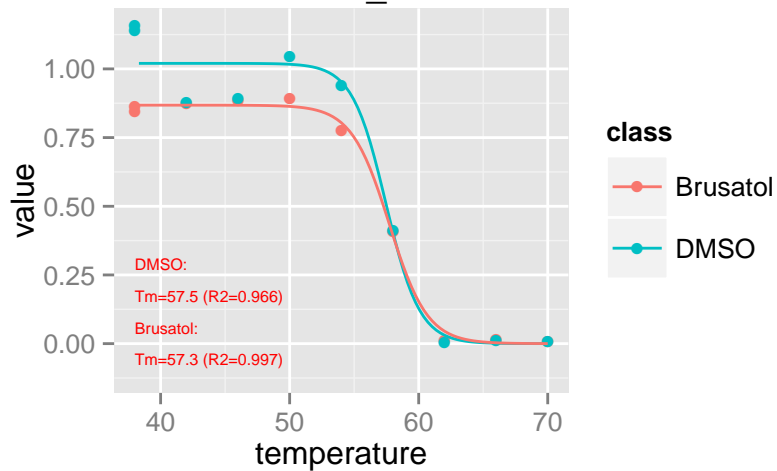

Prot: CAB45\_HUMAN

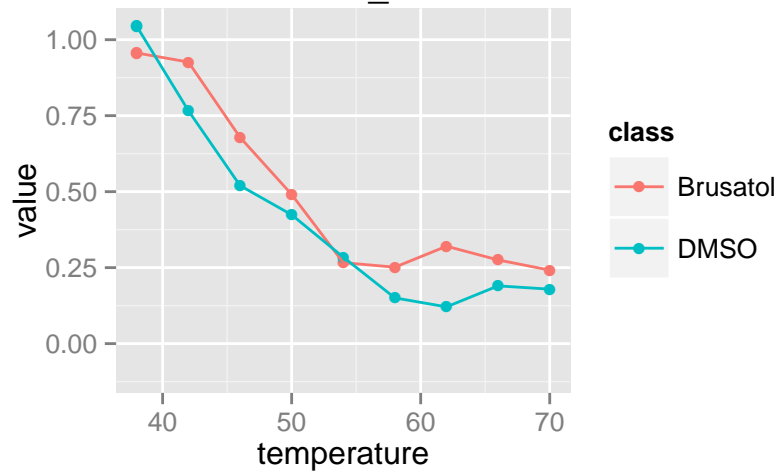

Prot: CACP\_HUMAN

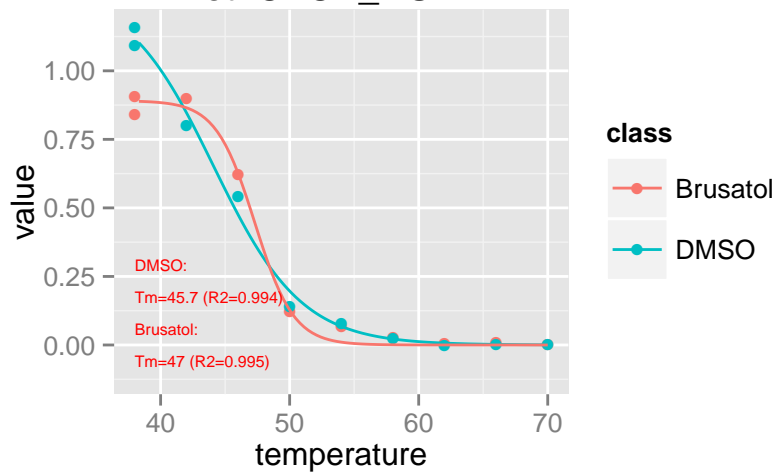

Prot: CADH2\_HUMAN

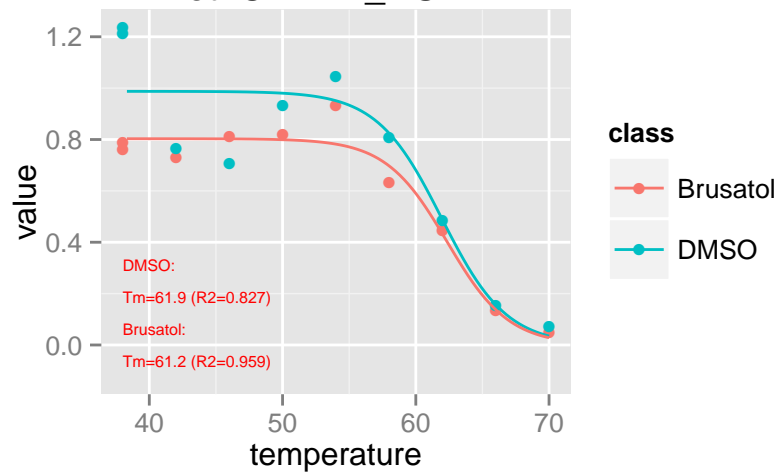

Prot: CAF17\_HUMAN

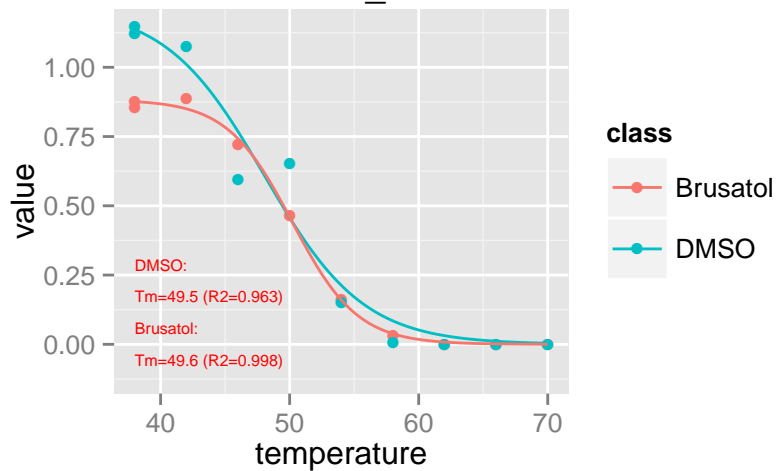

Prot: CAF1B\_HUMAN

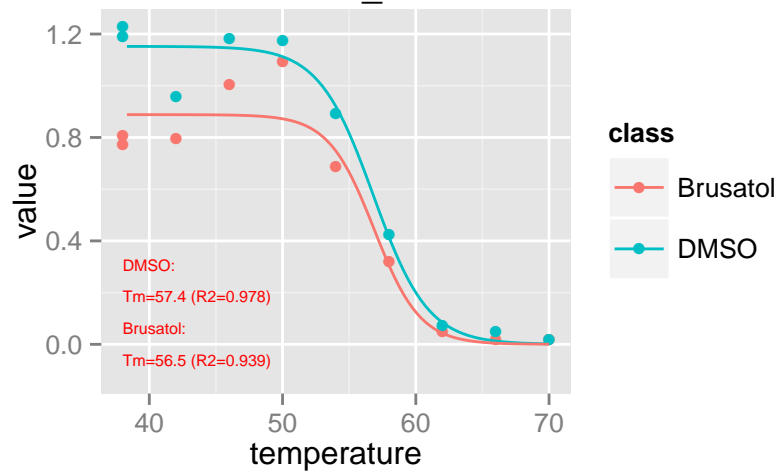

Prot: CAH12\_HUMAN

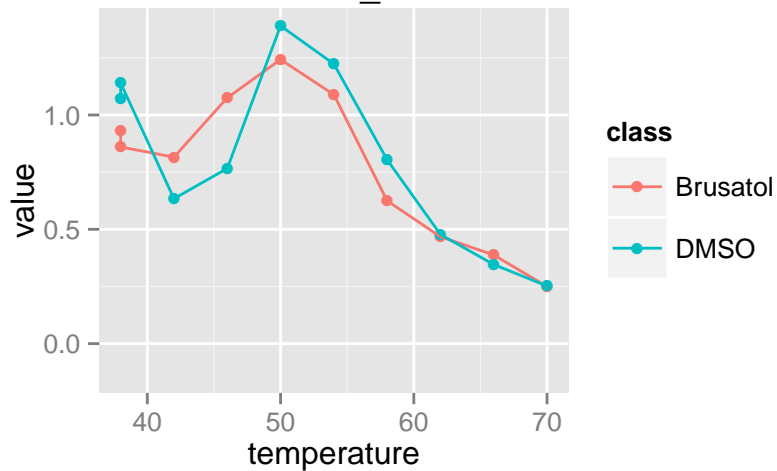

Prot: CAH8\_HUMAN

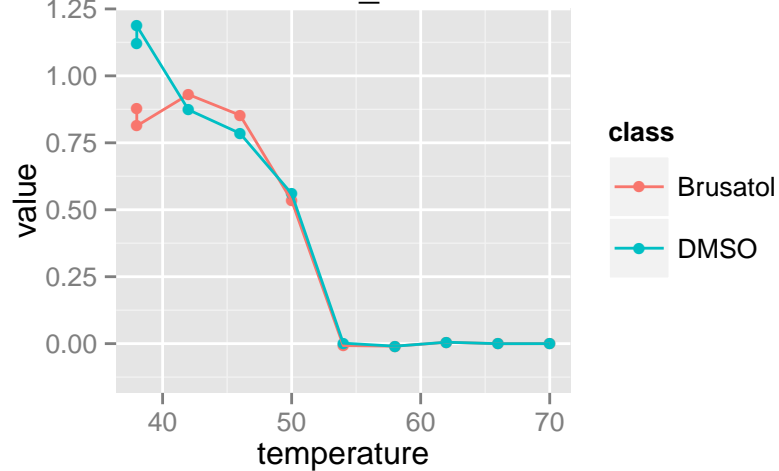

Prot: CALB2\_HUMAN

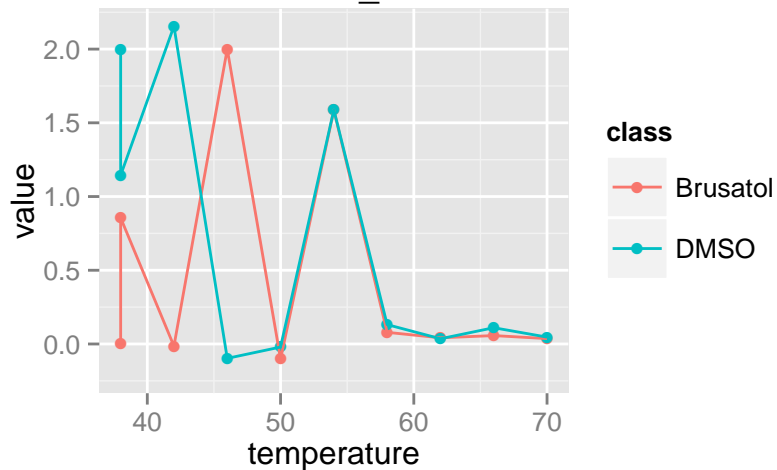

Prot: CALD1\_HUMAN

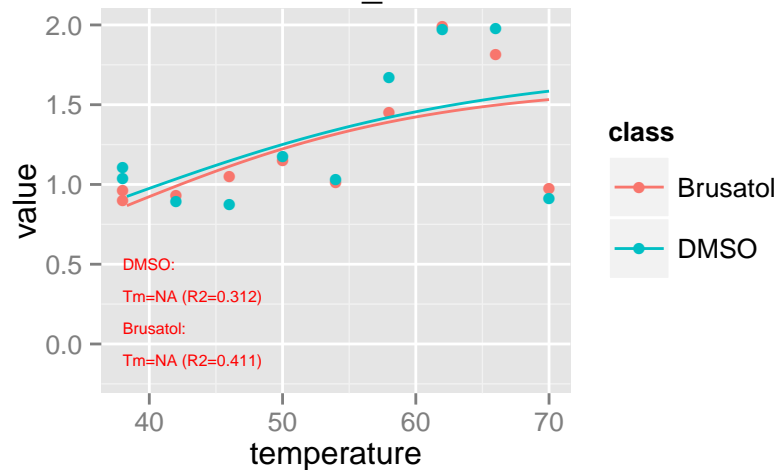

Prot: CALM\_HUMAN

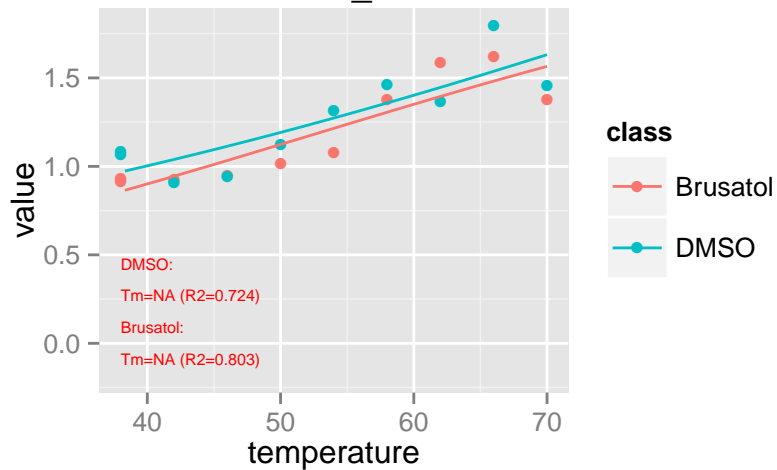

Prot: CALR\_HUMAN

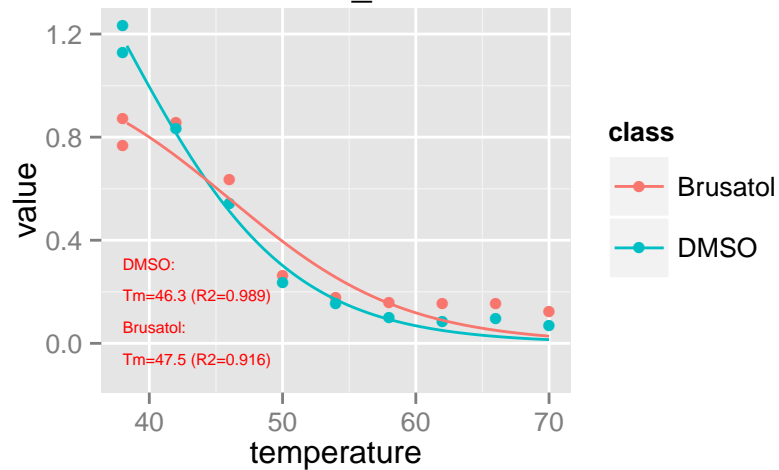

Prot: CALU\_HUMAN

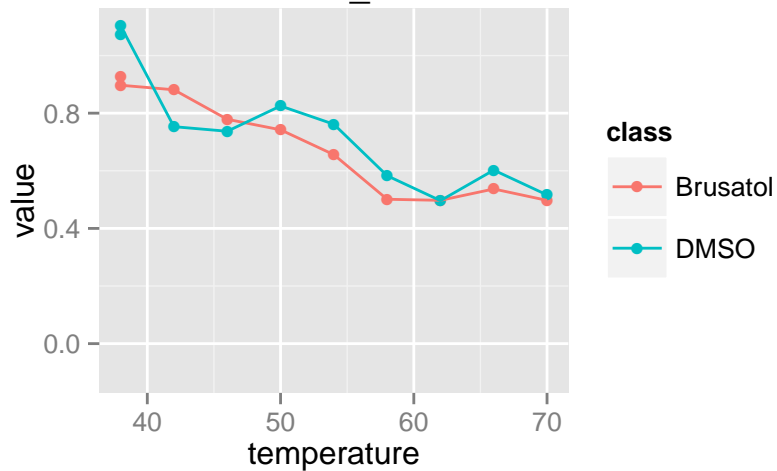

Prot: CALX\_HUMAN

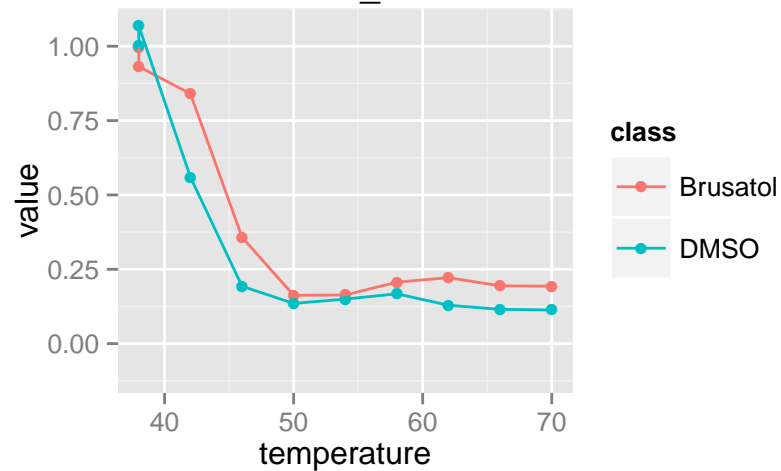

Prot: CAMP1\_HUMAN

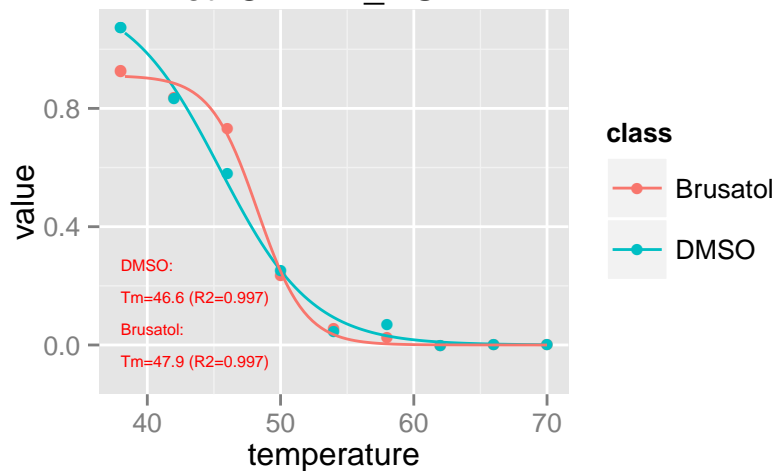

Prot: CAN1\_HUMAN

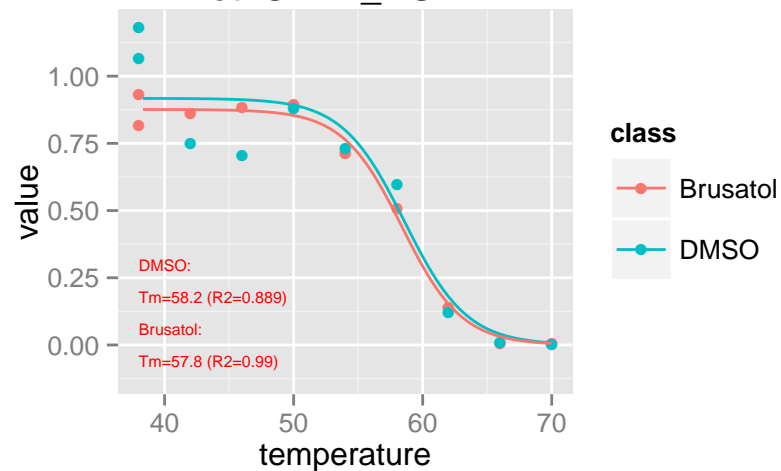

Prot: CAN2\_HUMAN

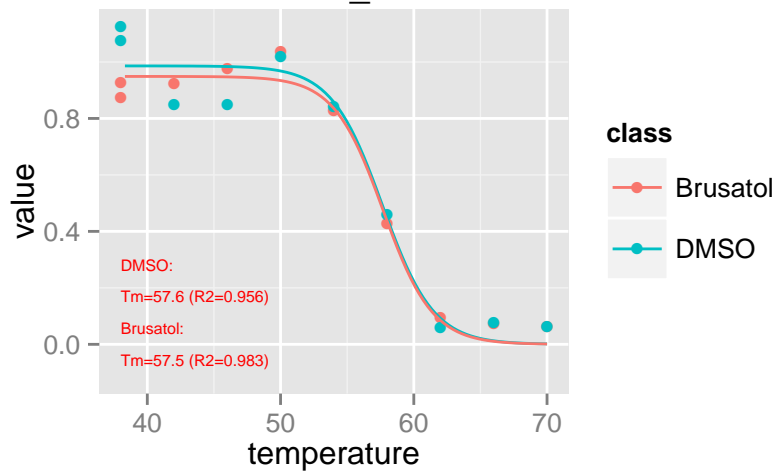

Prot: CANB1\_HUMAN

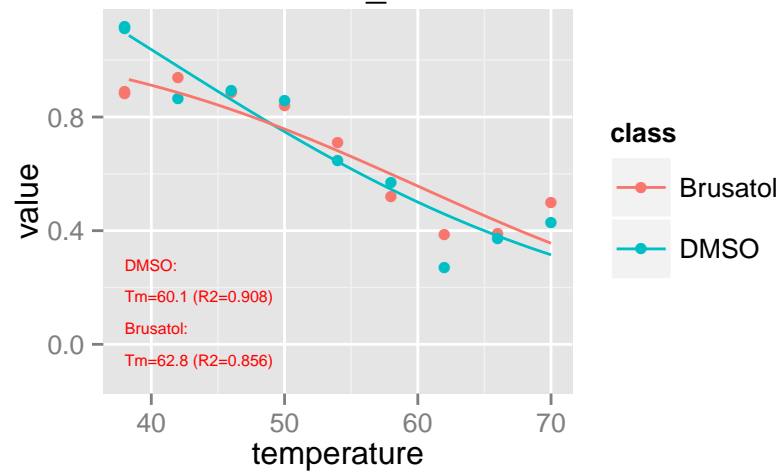

Prot: CAND1\_HUMAN

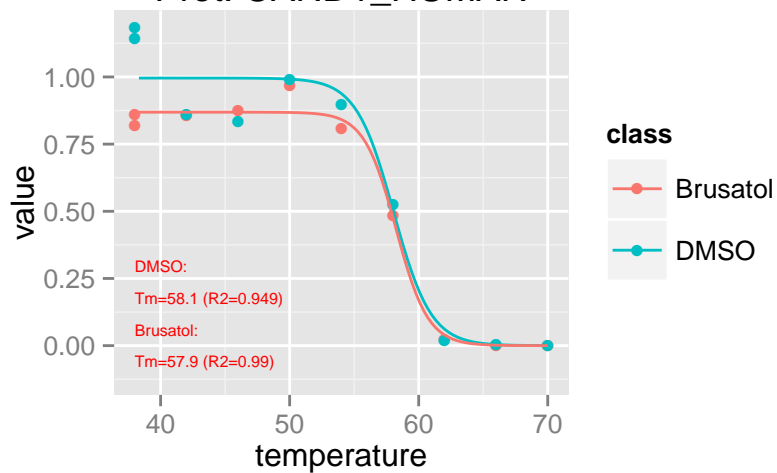

Prot: CAP1\_HUMAN

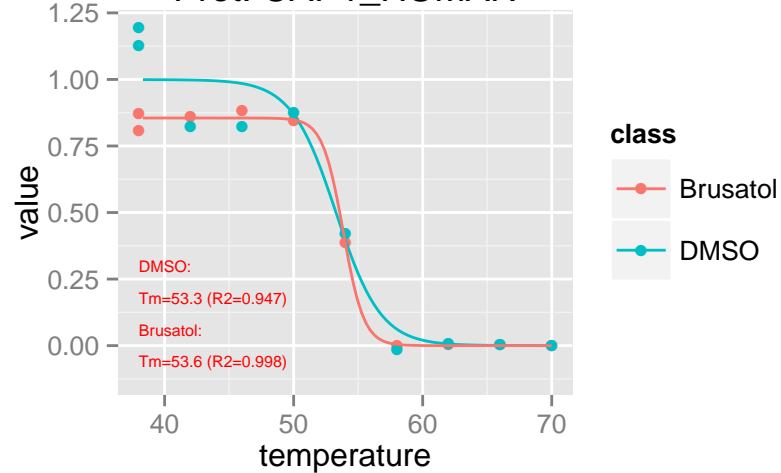

Prot: CAP2\_HUMAN

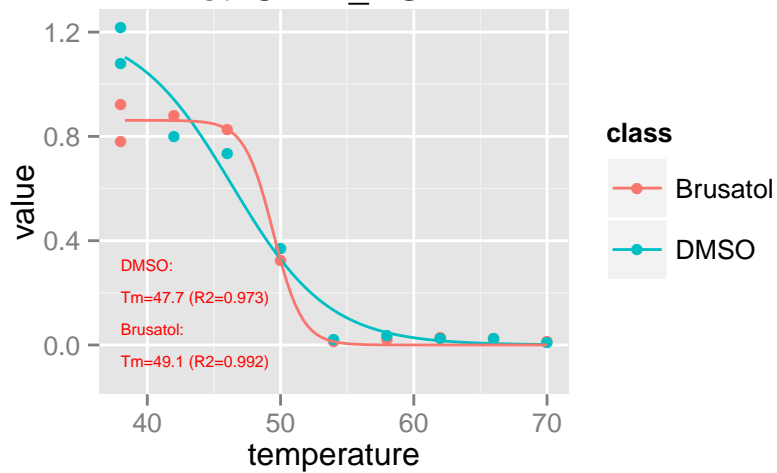

Prot: CAPG\_HUMAN

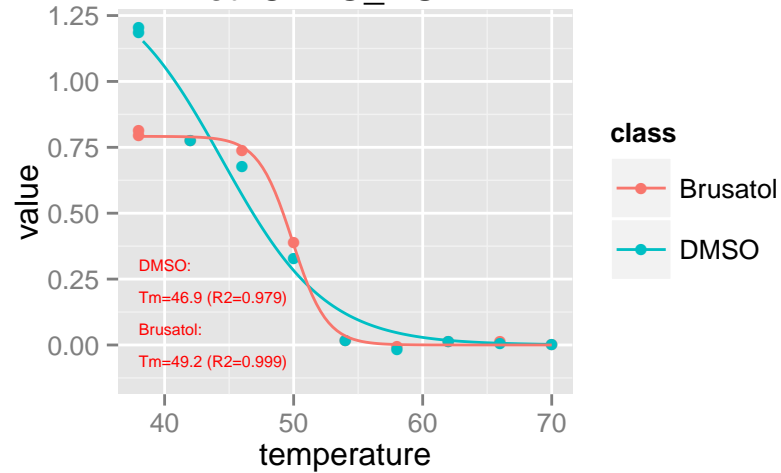

Prot: CAPR1\_HUMAN

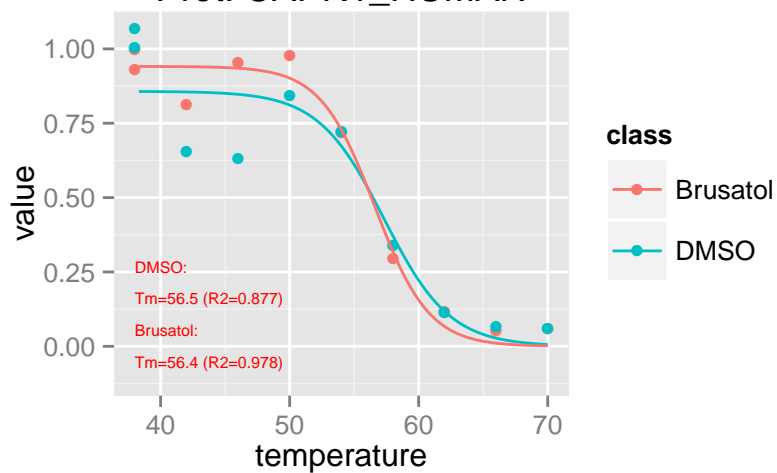

Prot: CAPZB\_HUMAN

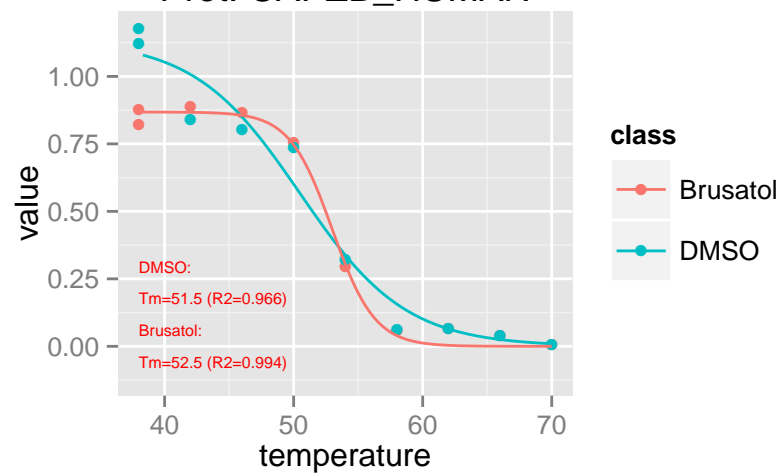

Prot: CARF\_HUMAN

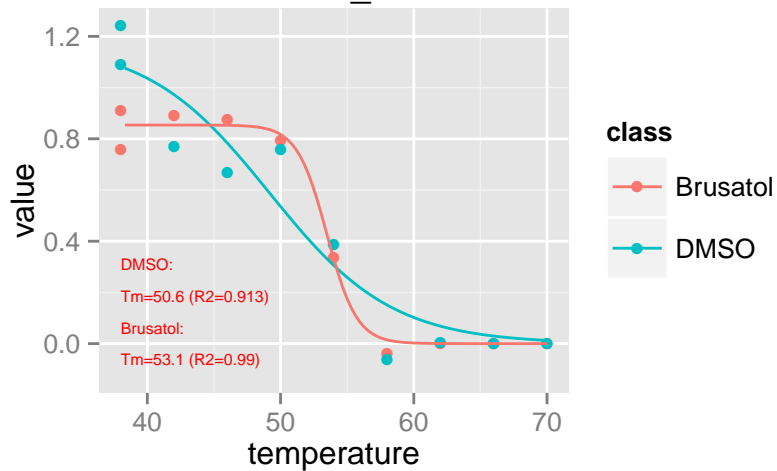

Prot: CARKD\_HUMAN

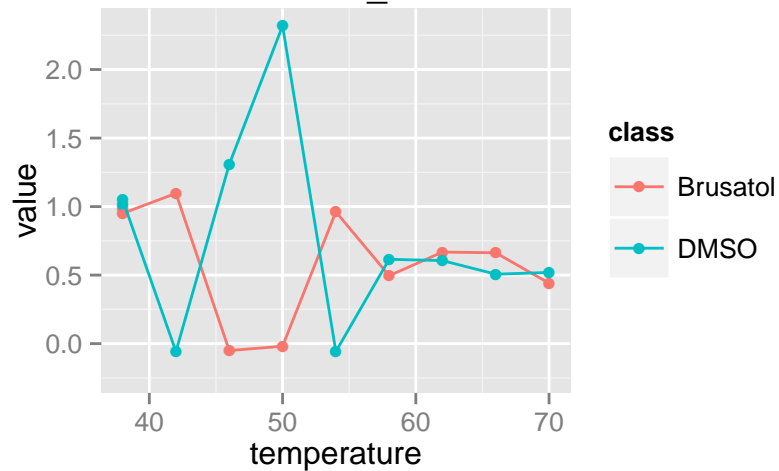

Prot: CARM1\_HUMAN

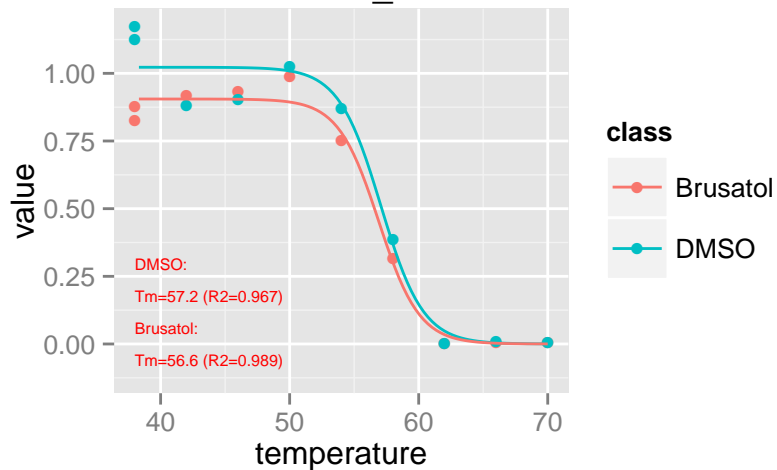

Prot: CASC3\_HUMAN

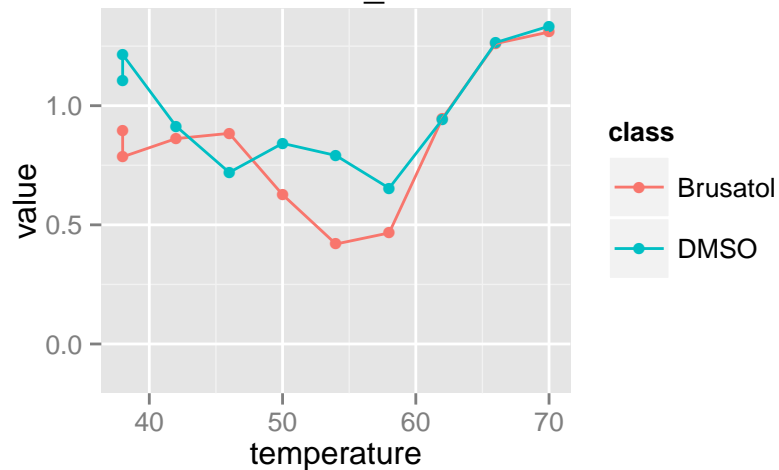

Prot: CASP2\_HUMAN

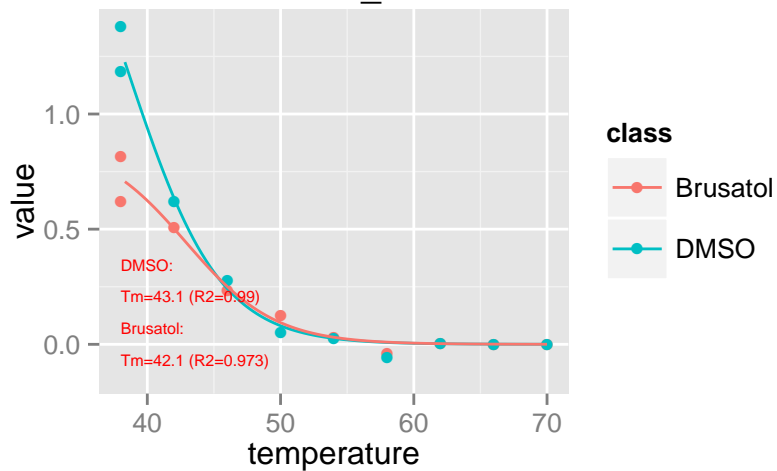

Prot: CASP3\_HUMAN

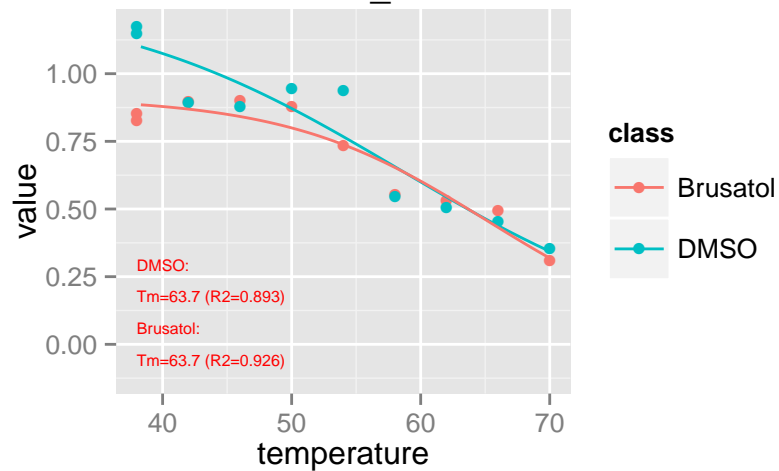

Prot: CASP6\_HUMAN

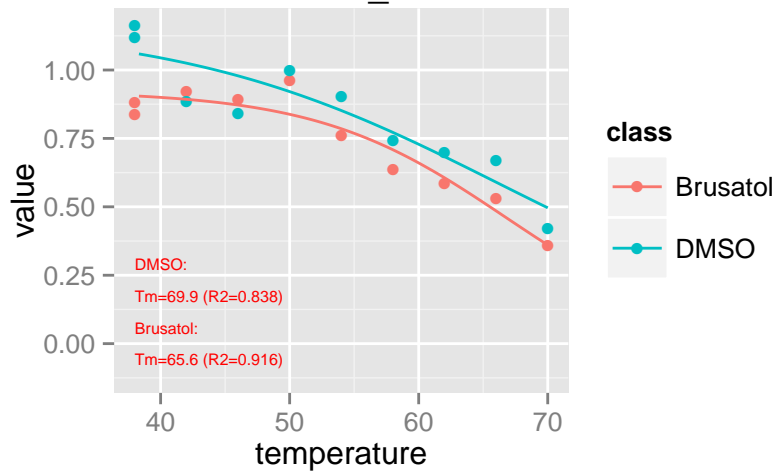

Prot: CASP7\_HUMAN

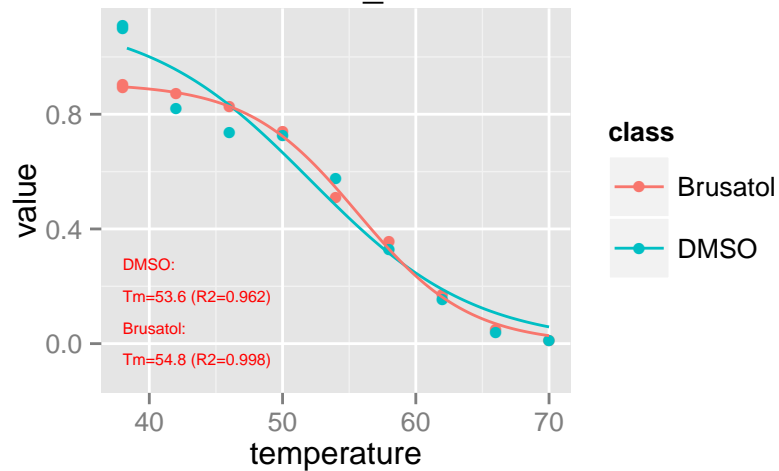

Prot: CASP8\_HUMAN

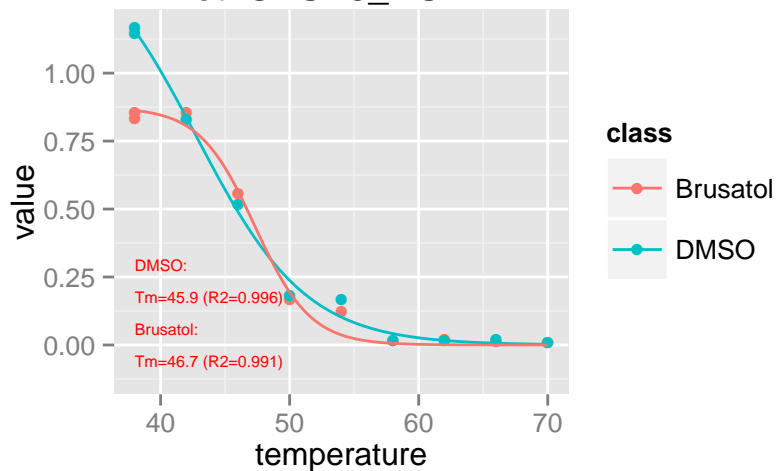

Prot: CATA\_HUMAN

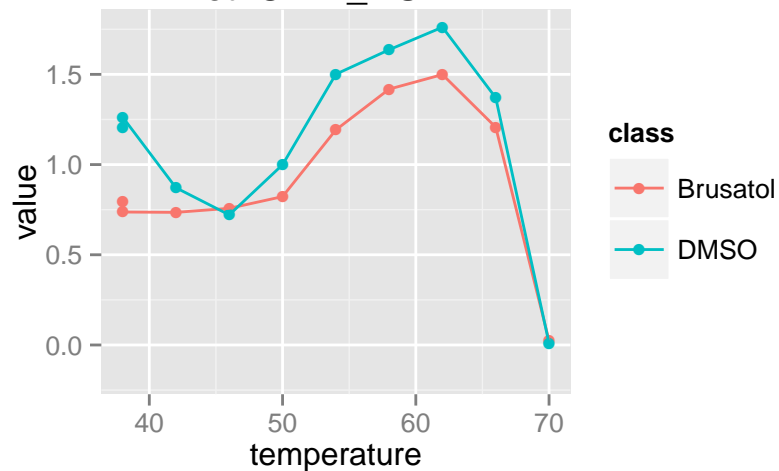

Prot: CATB\_HUMAN

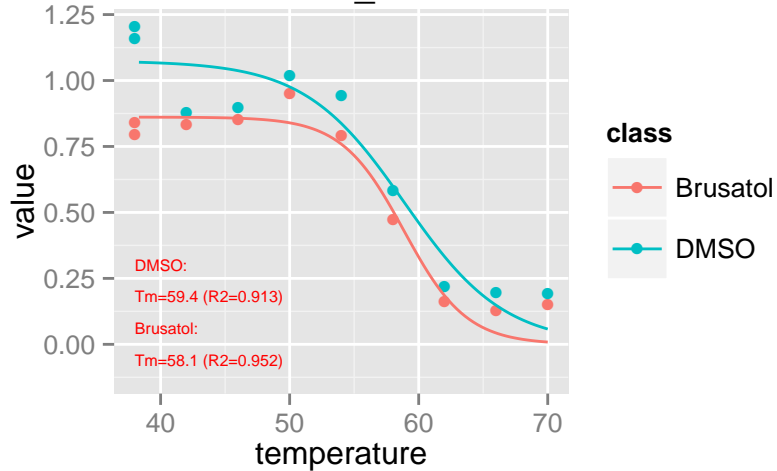

Prot: CATC\_HUMAN

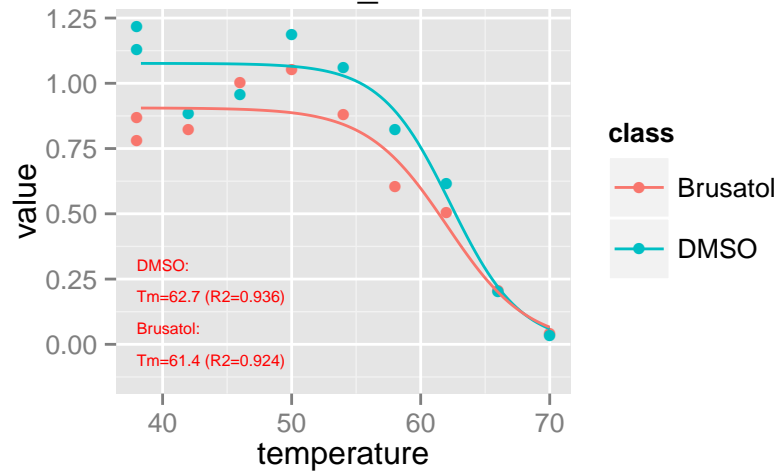



Prot: CATD\_HUMAN

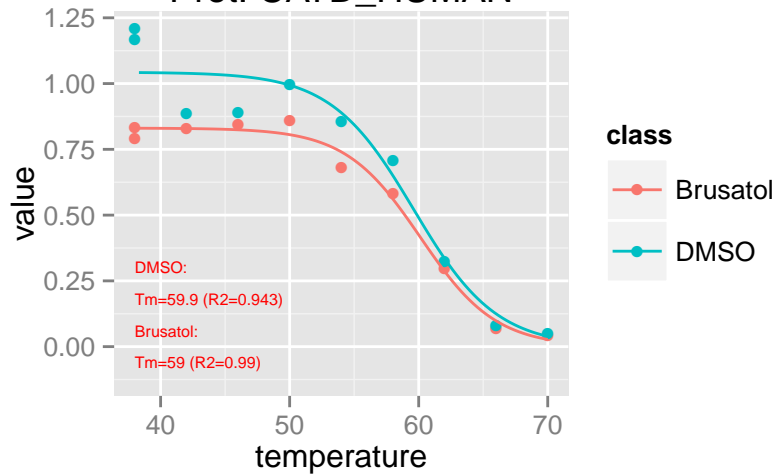

Prot: CATL1\_HUMAN

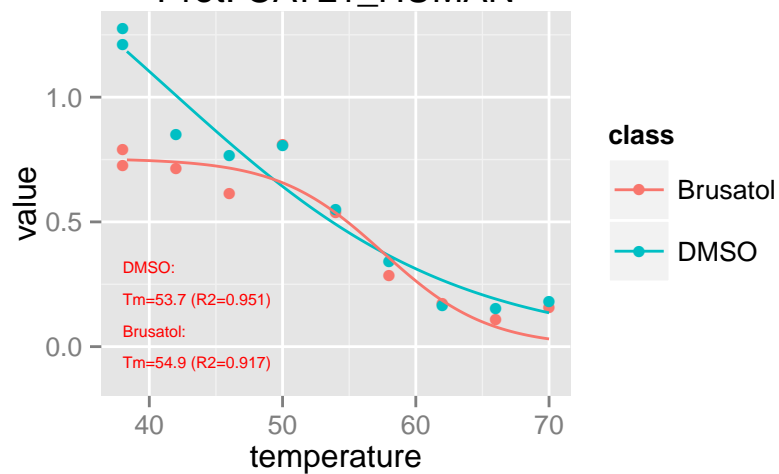

Prot: CATZ\_HUMAN

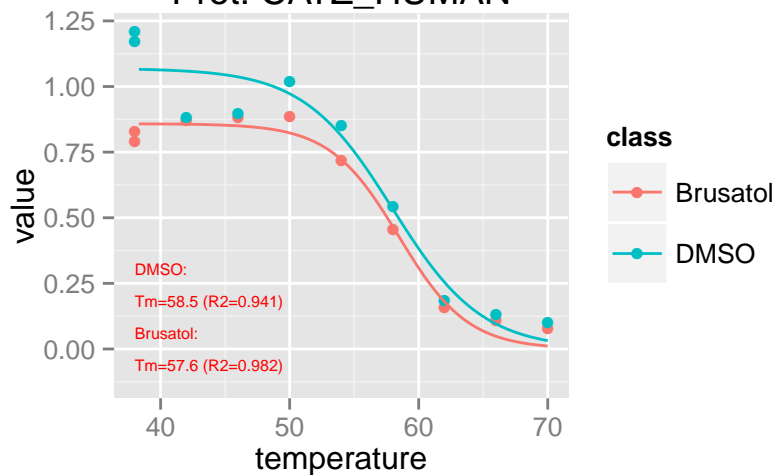

Prot: CAZA1\_HUMAN

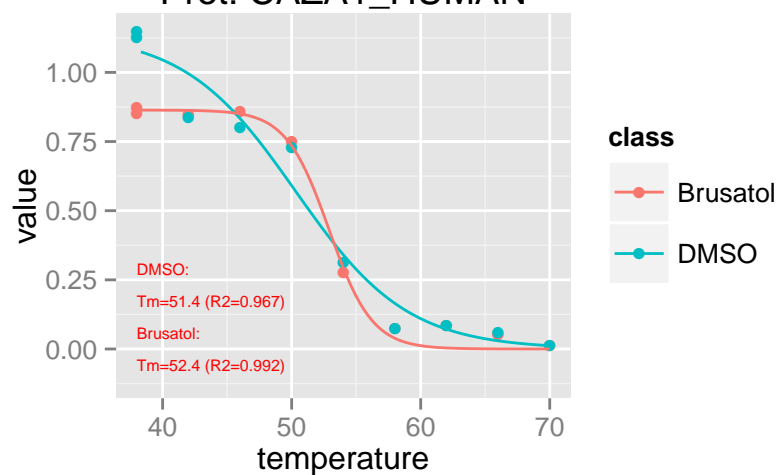

Prot: CAZA2\_HUMAN

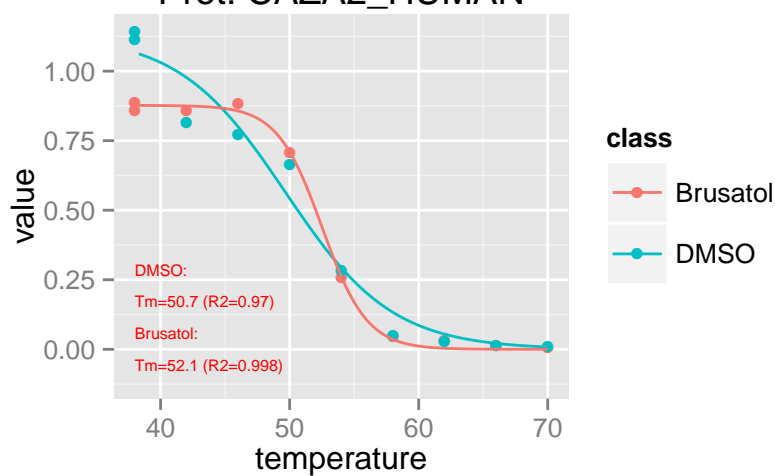

Prot: CB029\_HUMAN

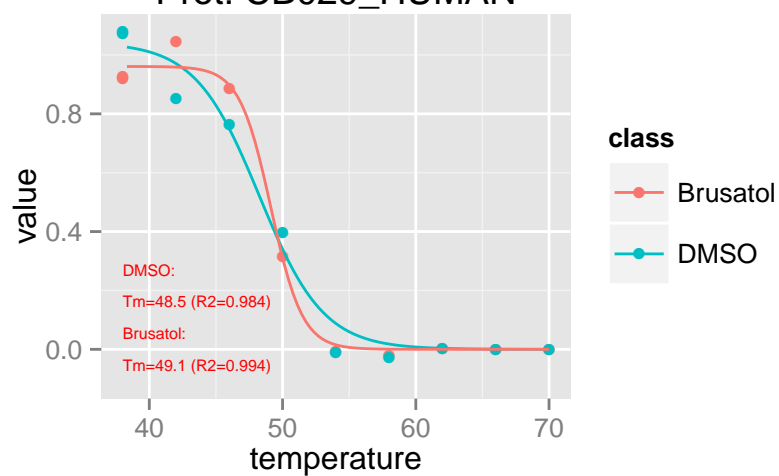

Prot: CB044\_HUMAN

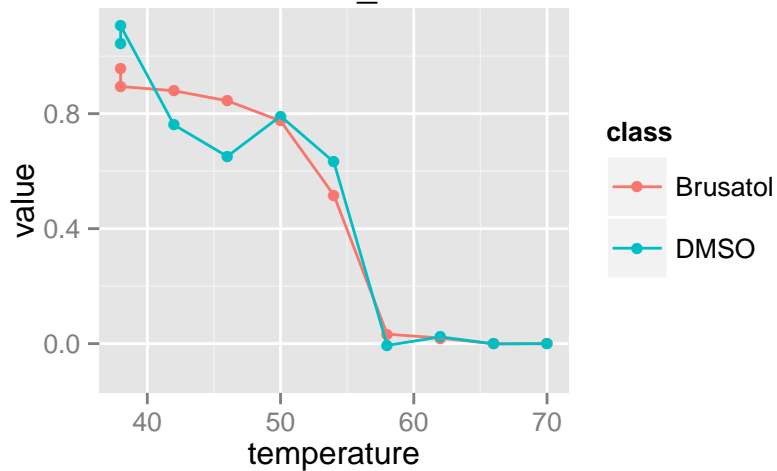

Prot: CBL\_HUMAN

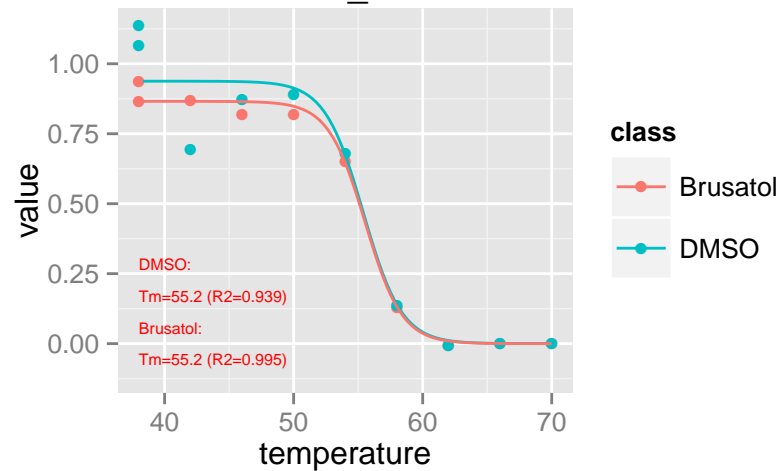

Prot: CBP\_HUMAN

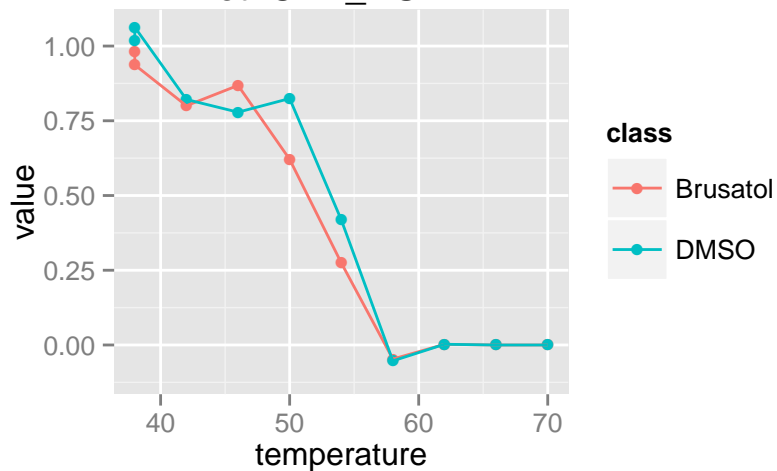

Prot: CBR1\_HUMAN

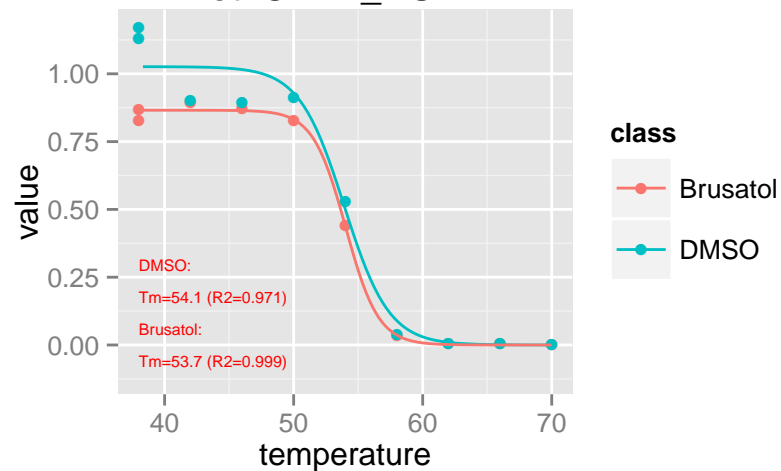

Prot: CBR3\_HUMAN

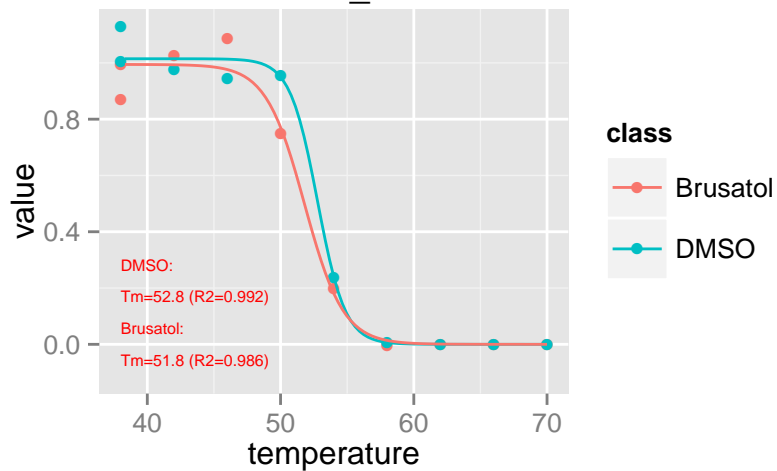

Prot: CBS\_HUMAN

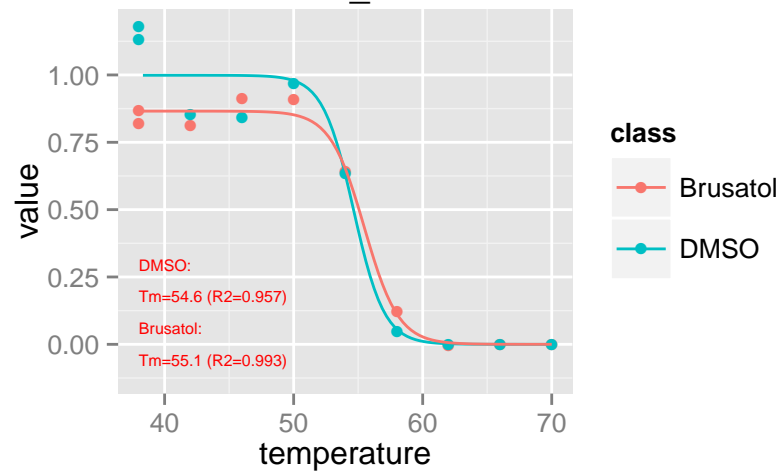

Prot: CBX1\_HUMAN

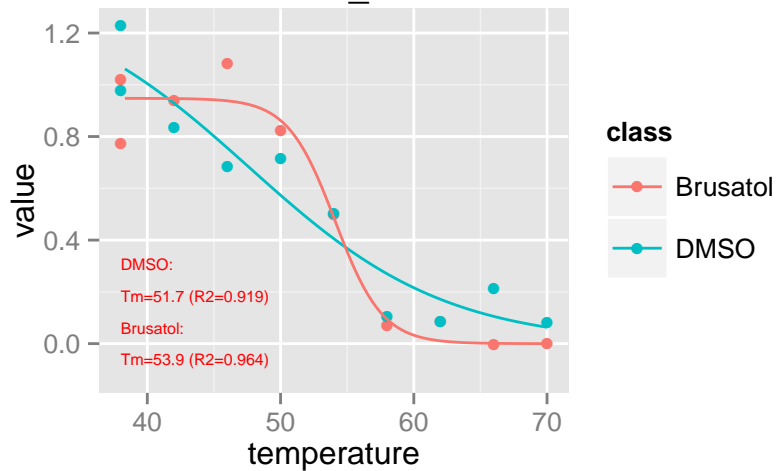

Prot: CBX3\_HUMAN

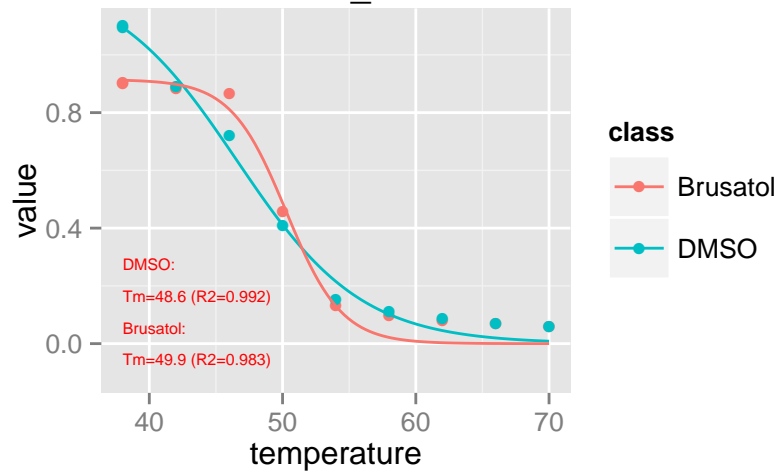

Prot: CC075\_HUMAN

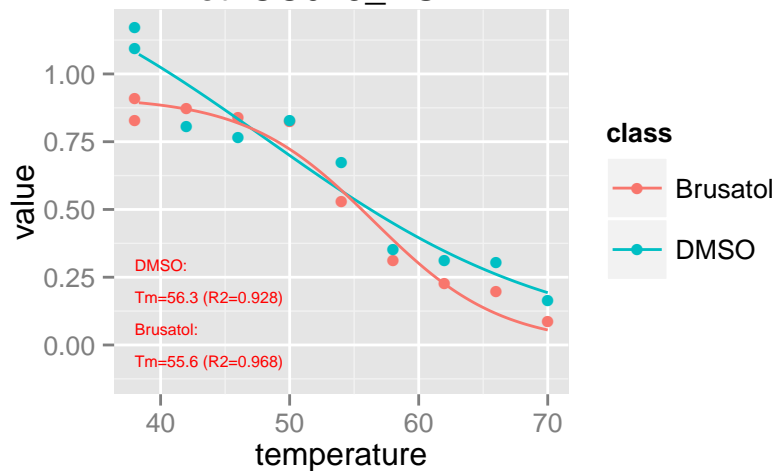

Prot: CC104\_HUMAN

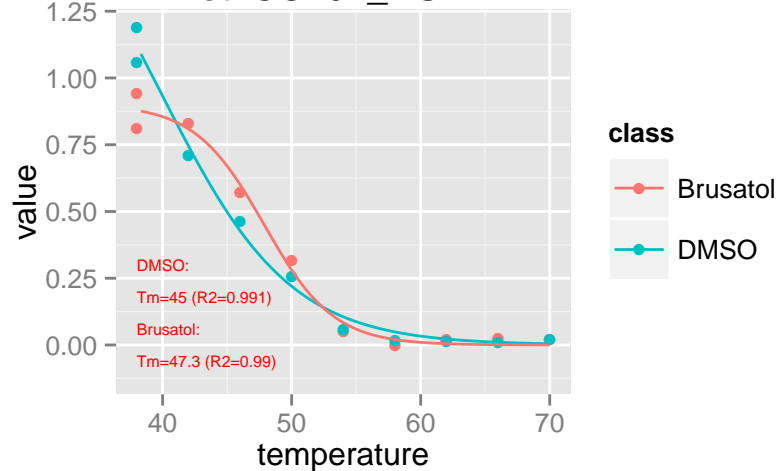

Prot: CC124\_HUMAN

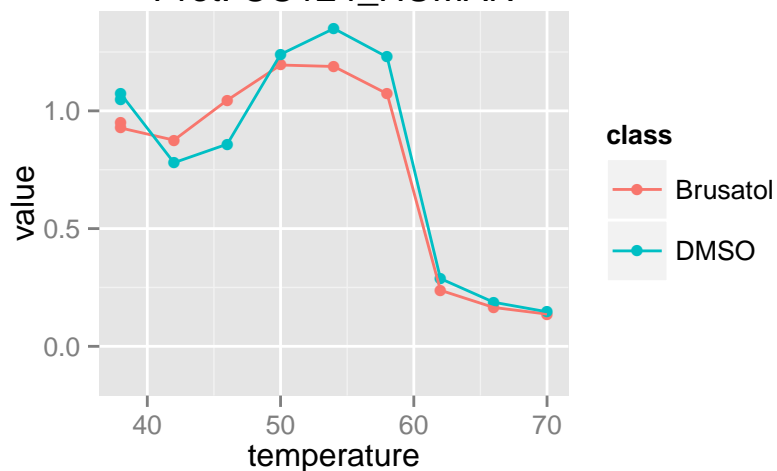

Prot: CCAR1\_HUMAN

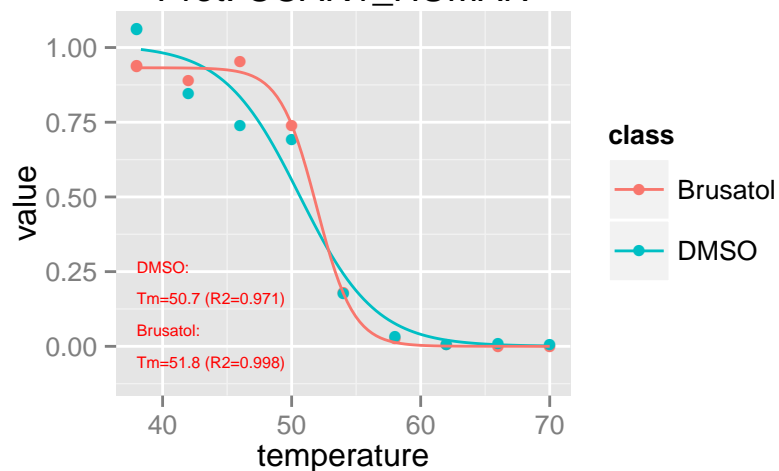

Prot: CCD12\_HUMAN

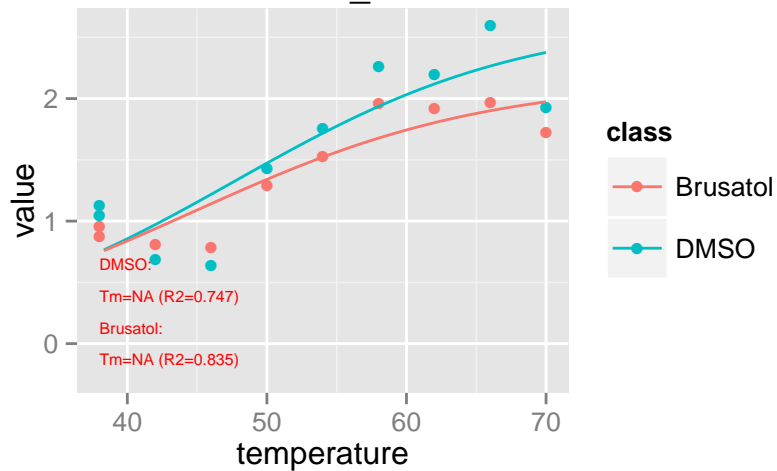

Prot: CCD22\_HUMAN

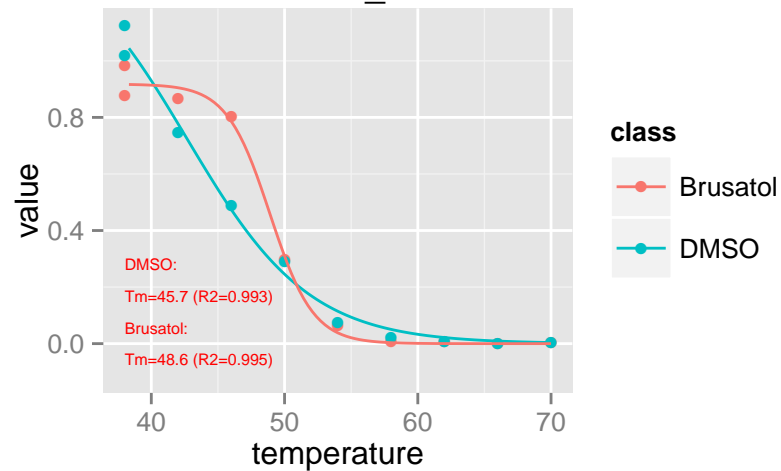

Prot: CCD25\_HUMAN

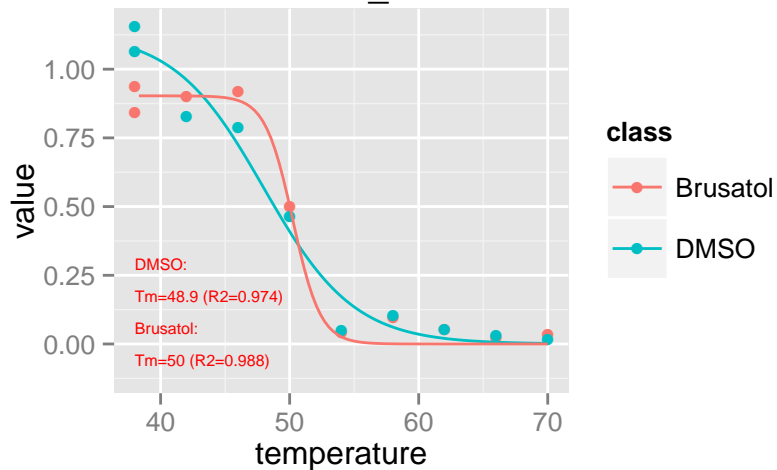

Prot: CCD43\_HUMAN

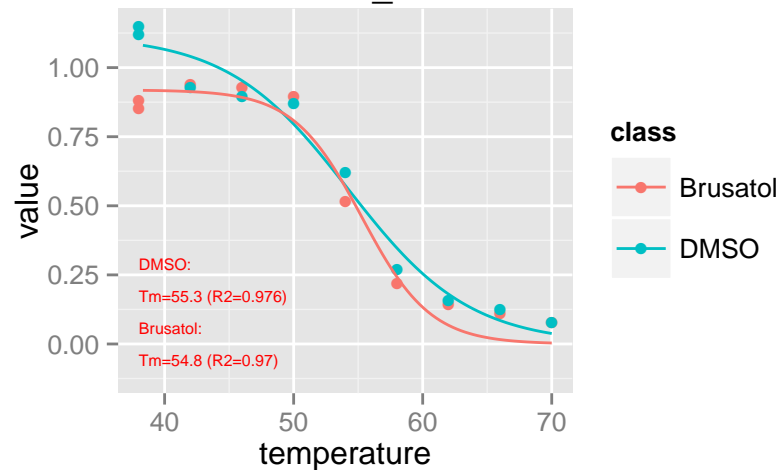

Prot: CCD50\_HUMAN

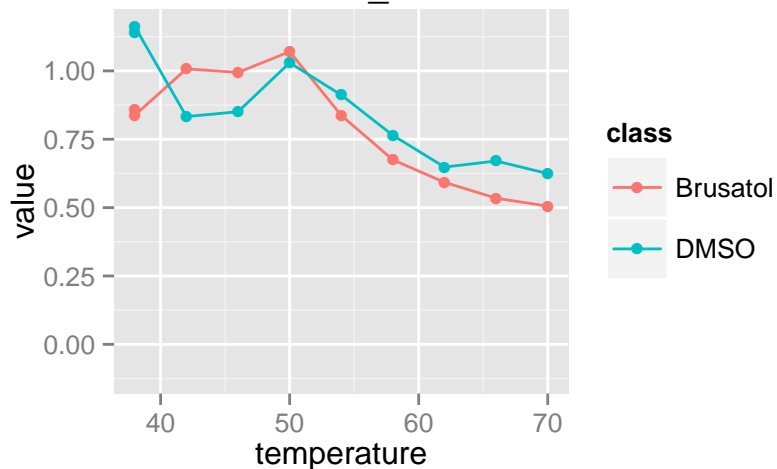

Prot: CCD53\_HUMAN

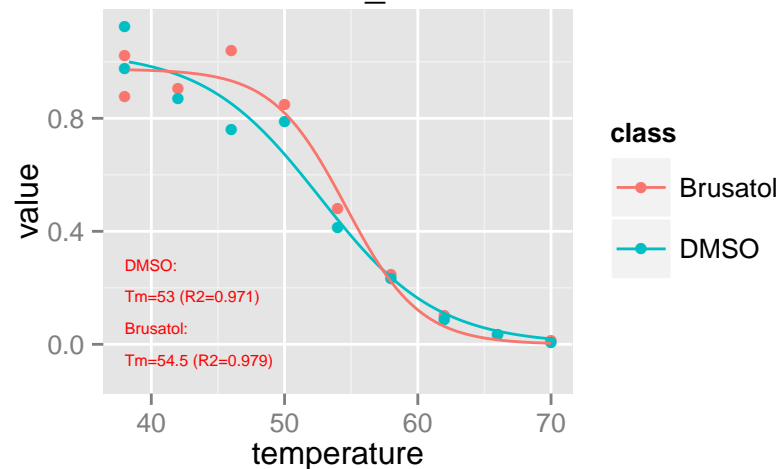

Prot: CCD58\_HUMAN

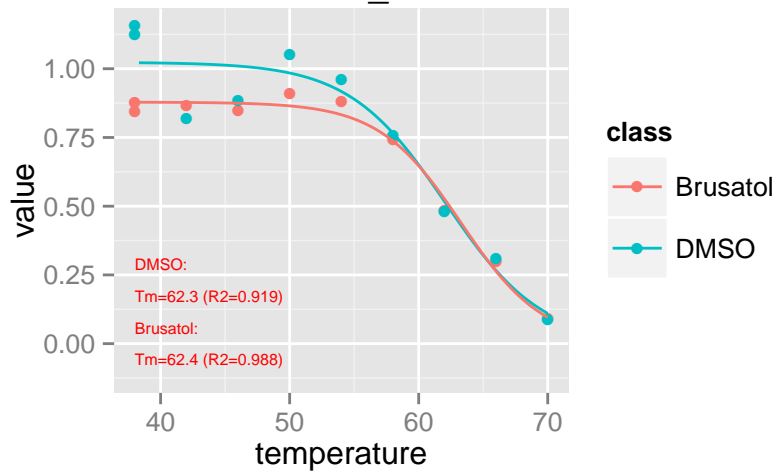

Prot: CCD72\_HUMAN

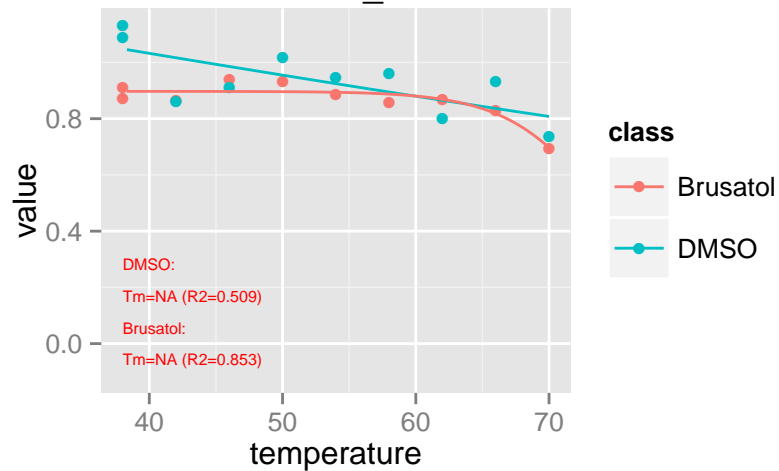

Prot: CCD86\_HUMAN

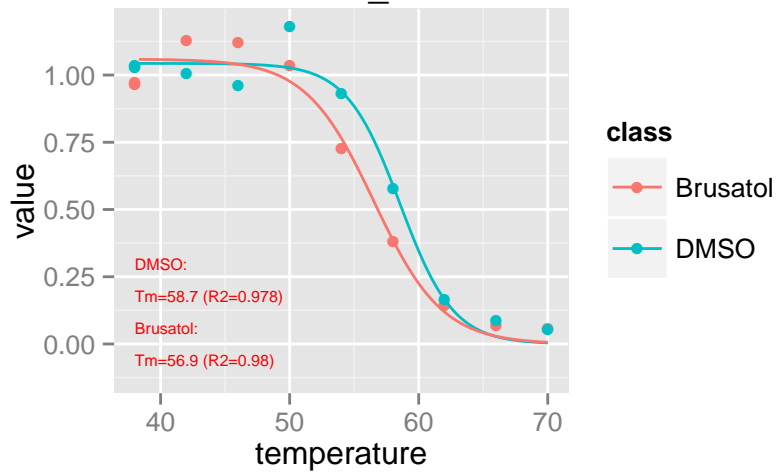

Prot: CCD91\_HUMAN

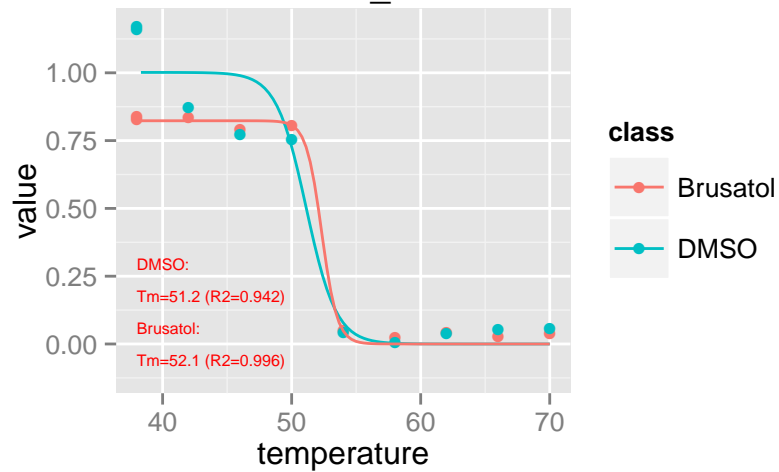

Prot: CCD93\_HUMAN

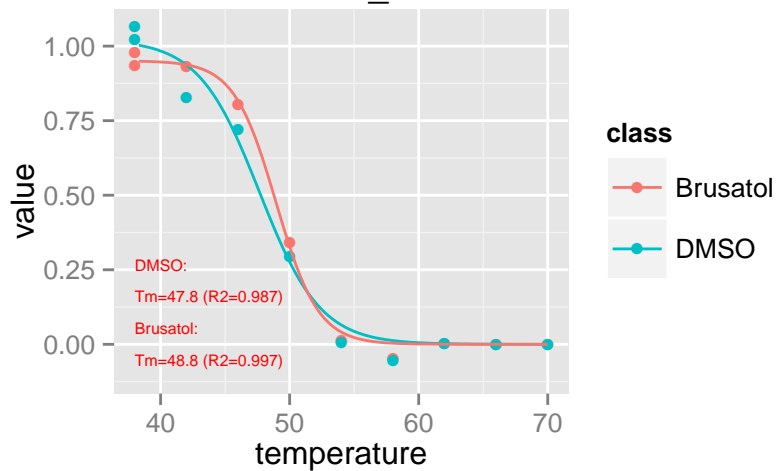

Prot: CCD94\_HUMAN

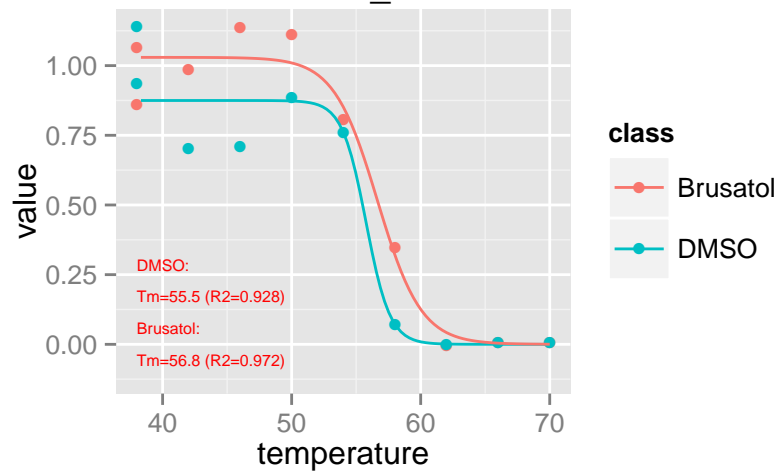

Prot: CCD97\_HUMAN

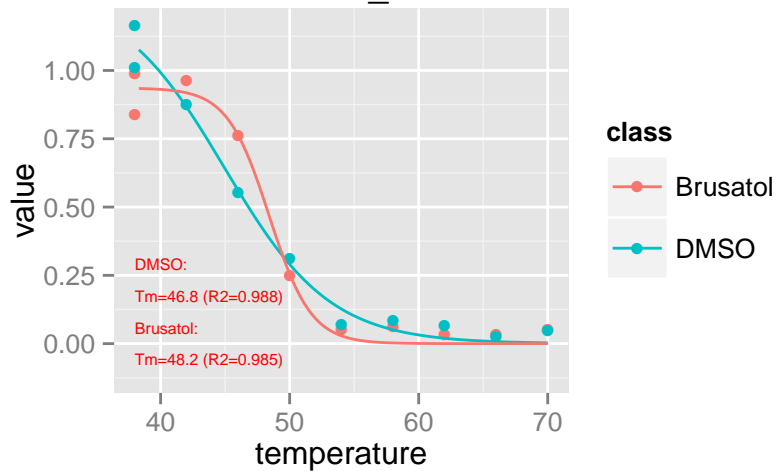

Prot: CCDC6\_HUMAN

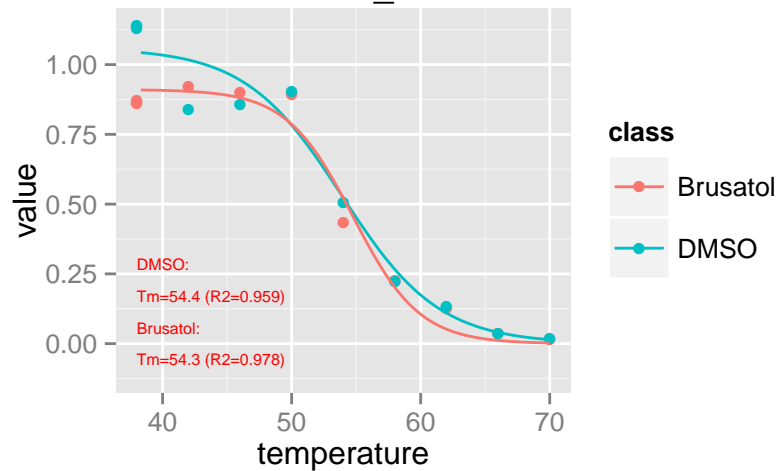

Prot: CCDC9\_HUMAN

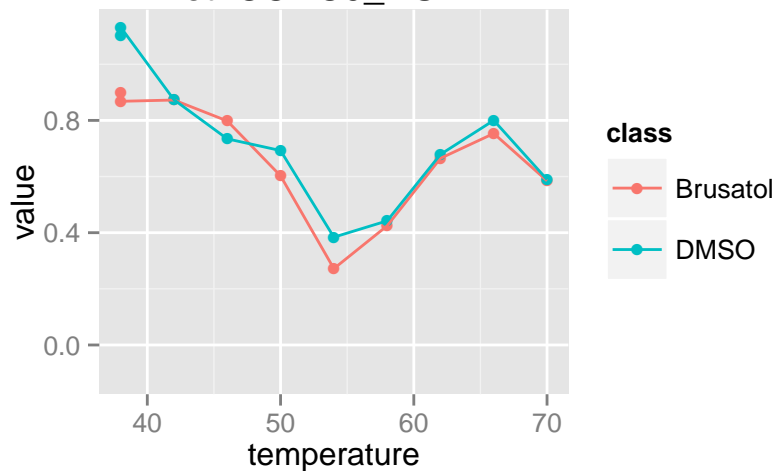

Prot: CCNB1\_HUMAN

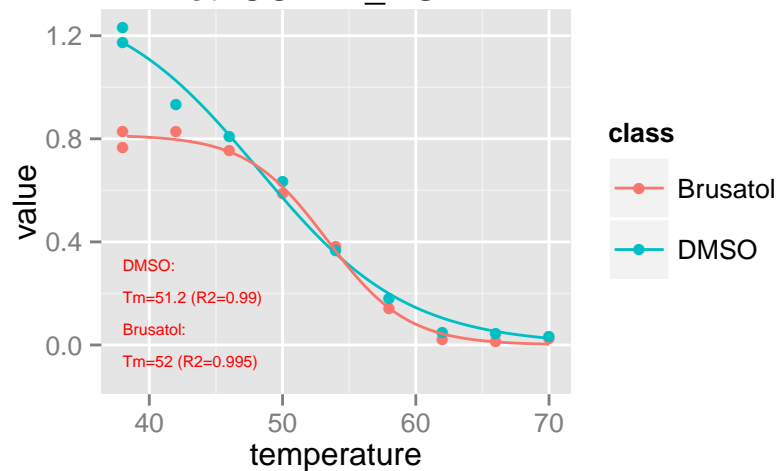

Prot: CCNH\_HUMAN

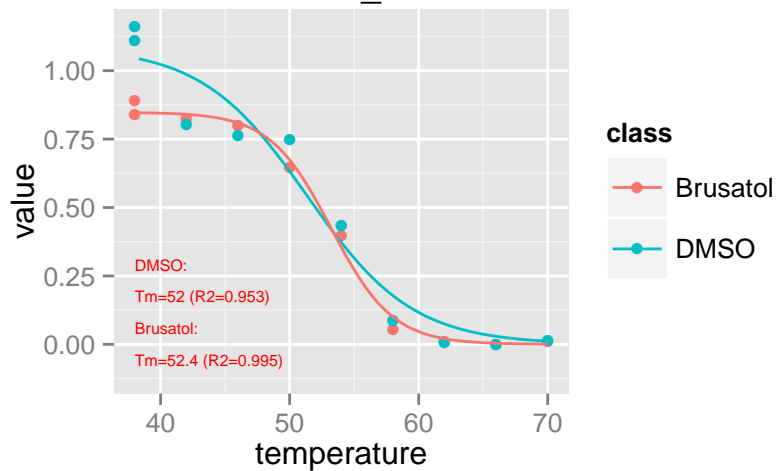

Prot: CCS\_HUMAN

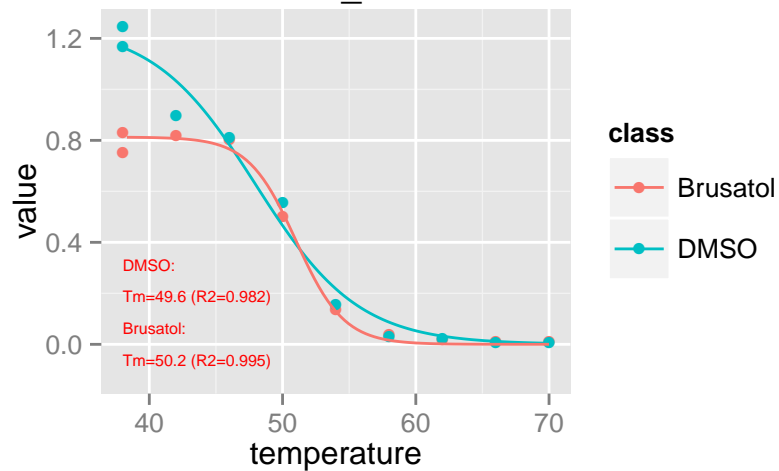

Prot: CCZ1L\_HUMAN

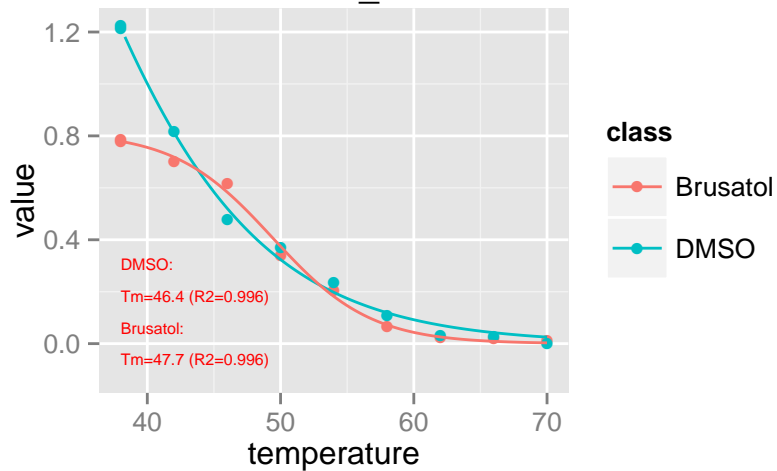

Prot: CD027\_HUMAN

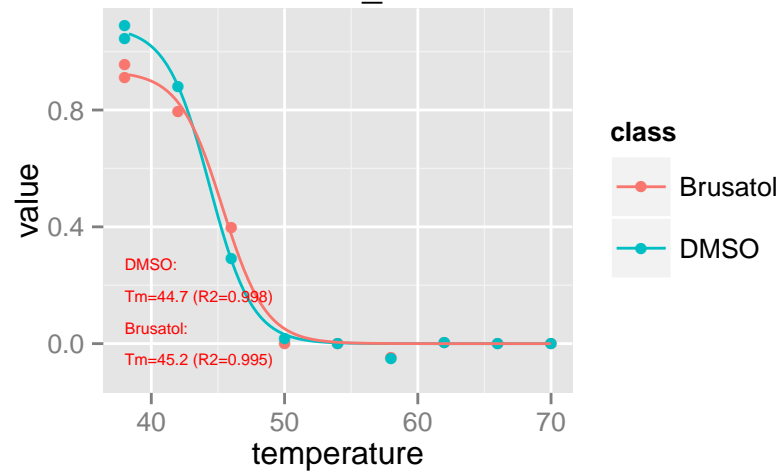

Prot: CD043\_HUMAN

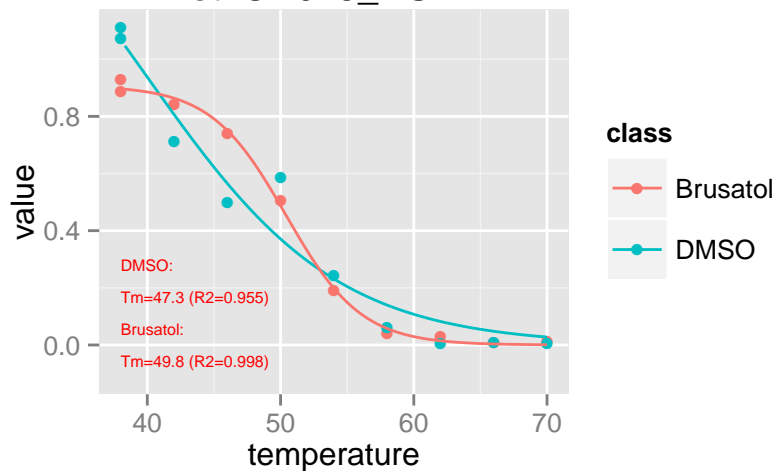

Prot: CD11A\_HUMAN

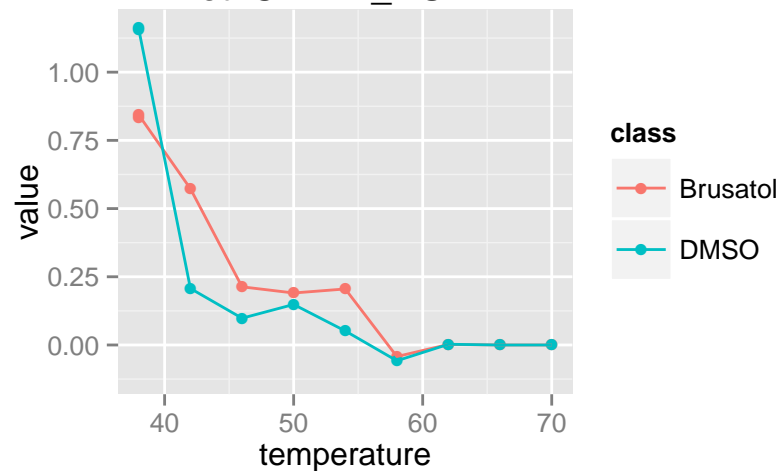

Prot: CD123\_HUMAN

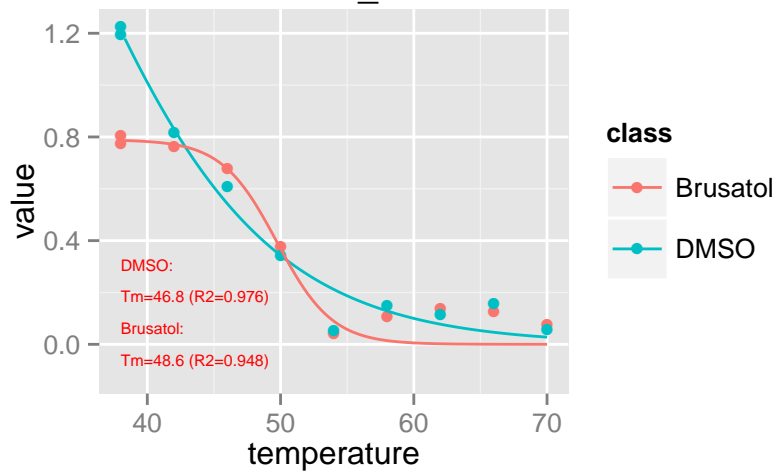

Prot: CD166\_HUMAN

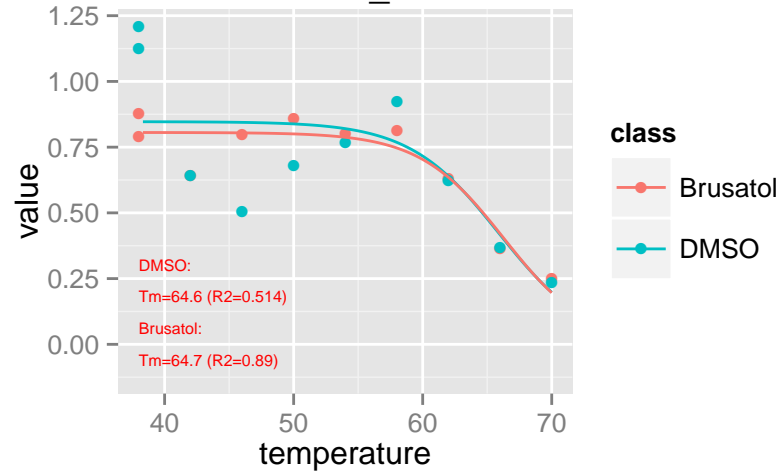

Prot: CD2AP\_HUMAN

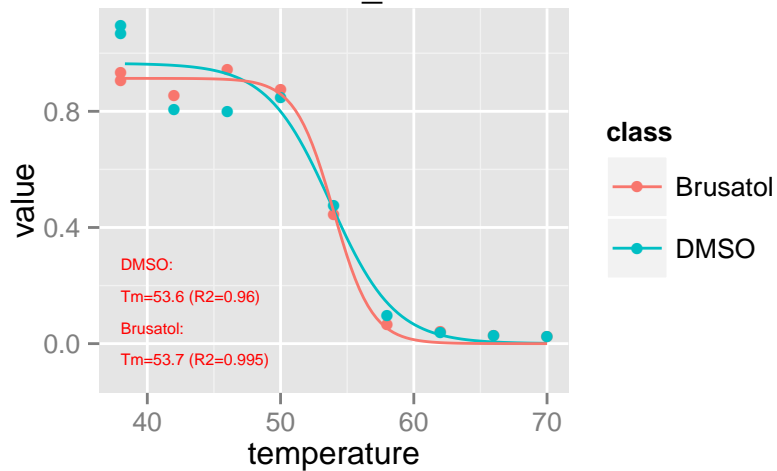

Prot: CD2B2\_HUMAN

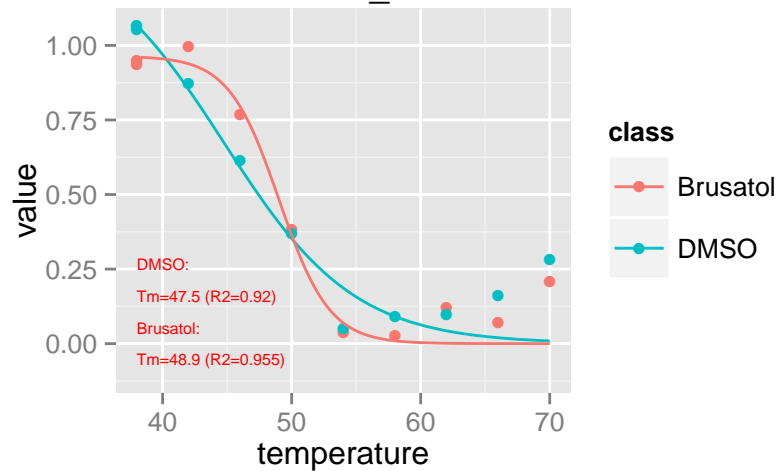

Prot: CD44\_HUMAN

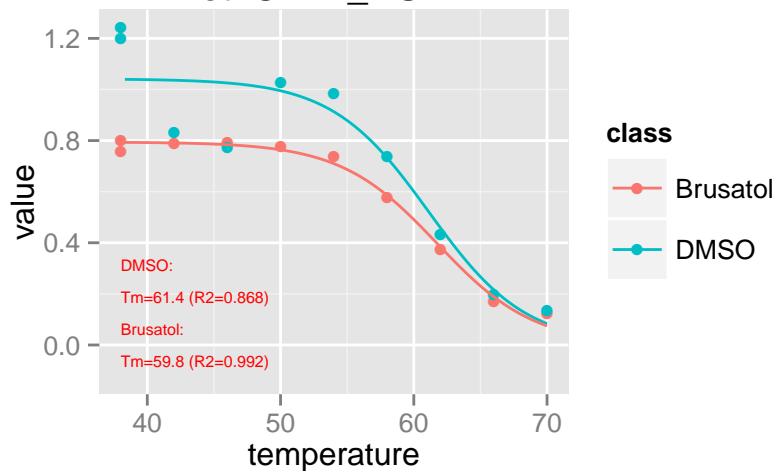

Prot: CD59\_HUMAN

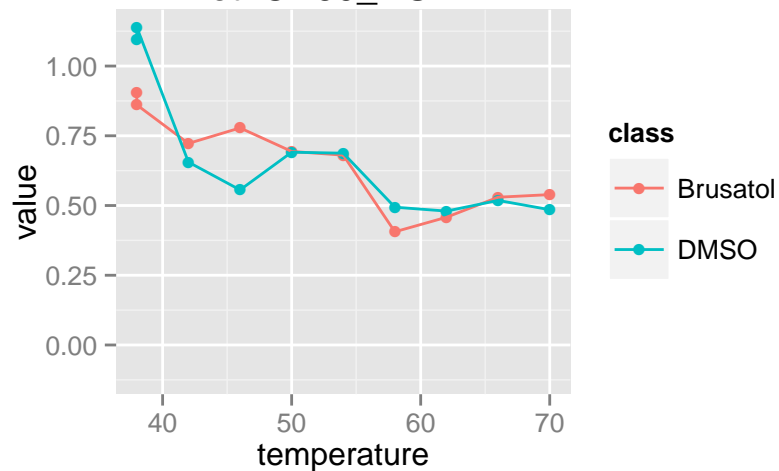

Prot: CD81\_HUMAN

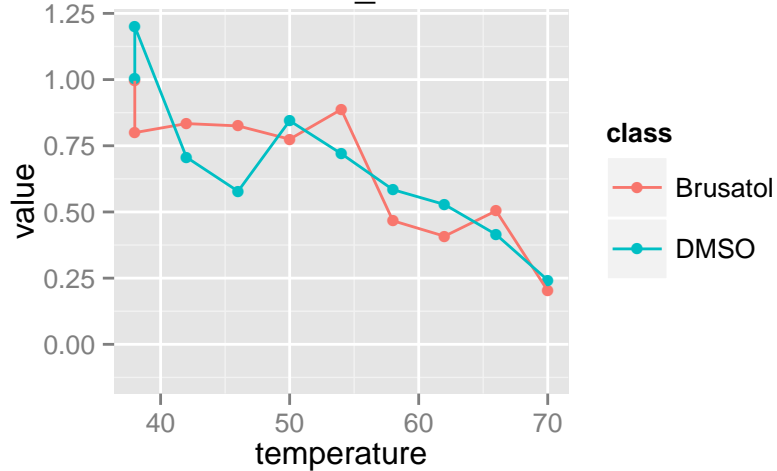

Prot: CD9\_HUMAN

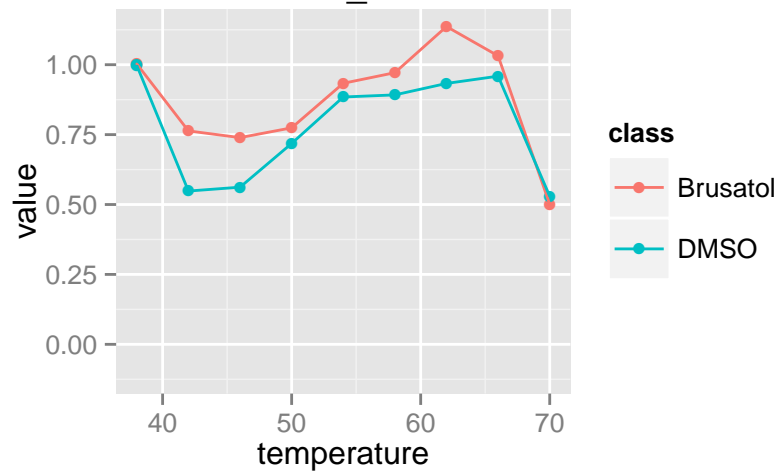



Prot: CD97\_HUMAN

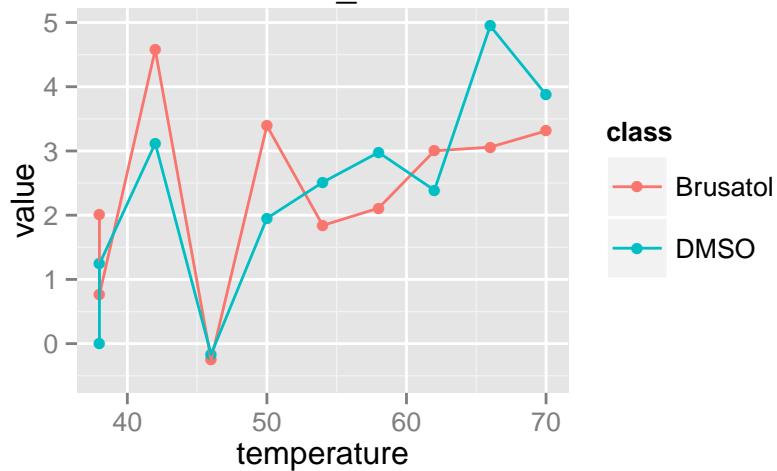

Prot: CDC16\_HUMAN

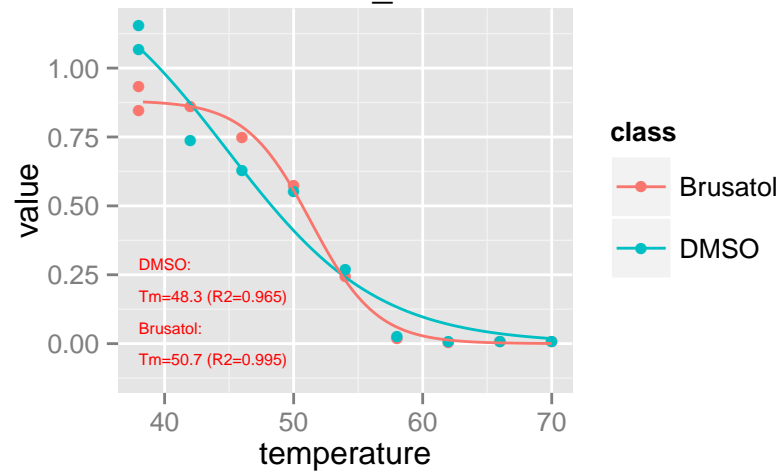

Prot: CDC23\_HUMAN

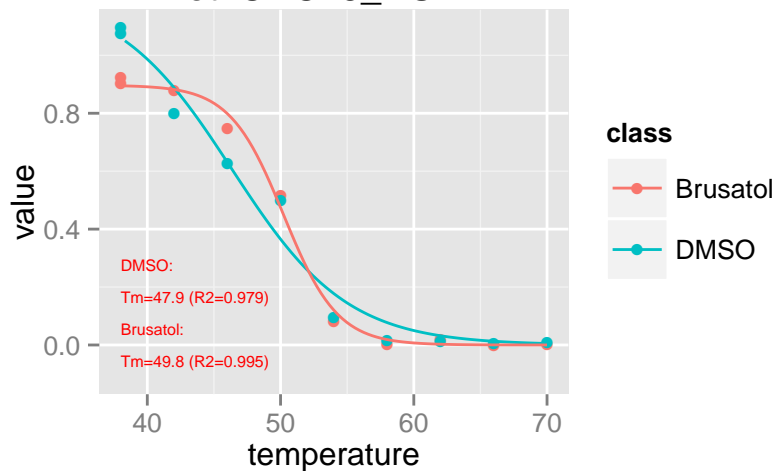

Prot: CDC26\_HUMAN

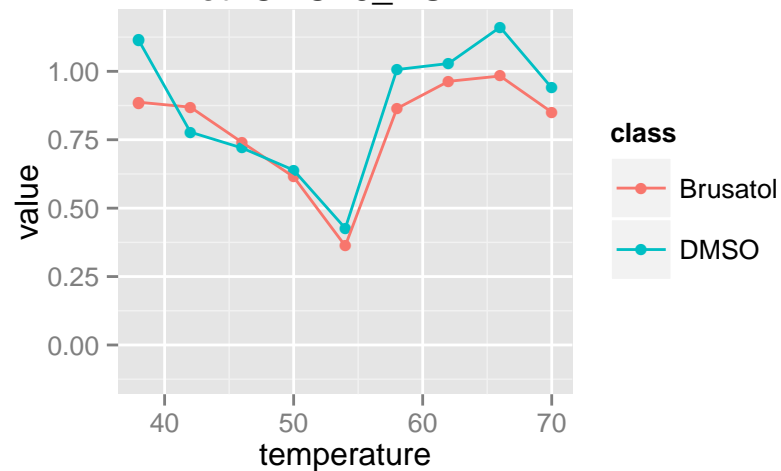

Prot: CDC27\_HUMAN

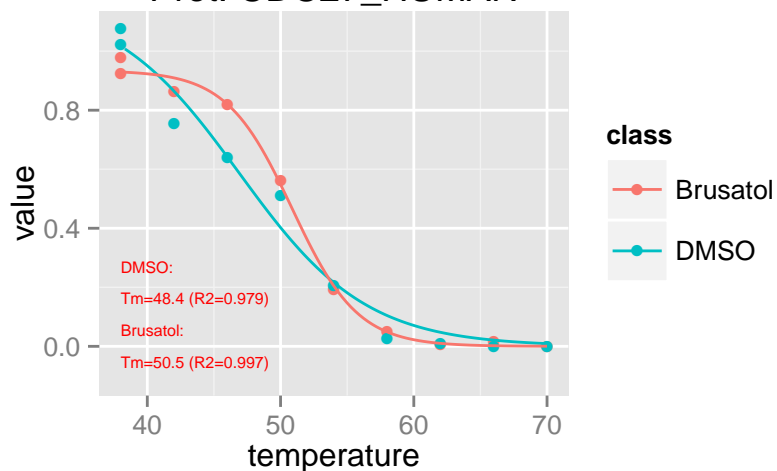

Prot: CDC37\_HUMAN

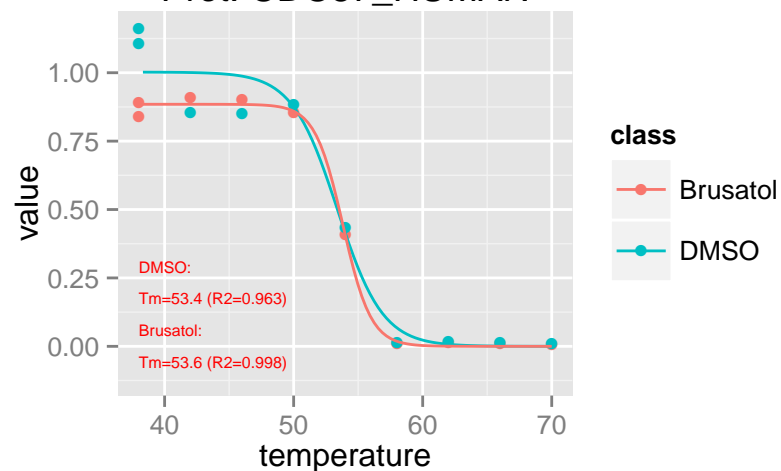

Prot: CDC42\_HUMAN

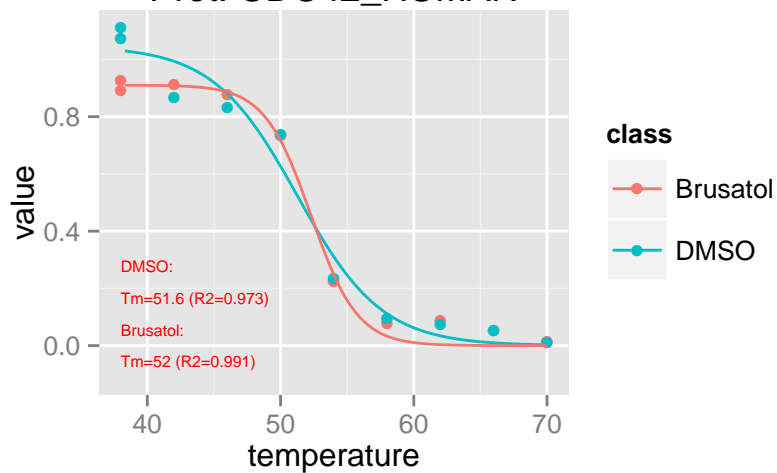

Prot: CDC5L\_HUMAN

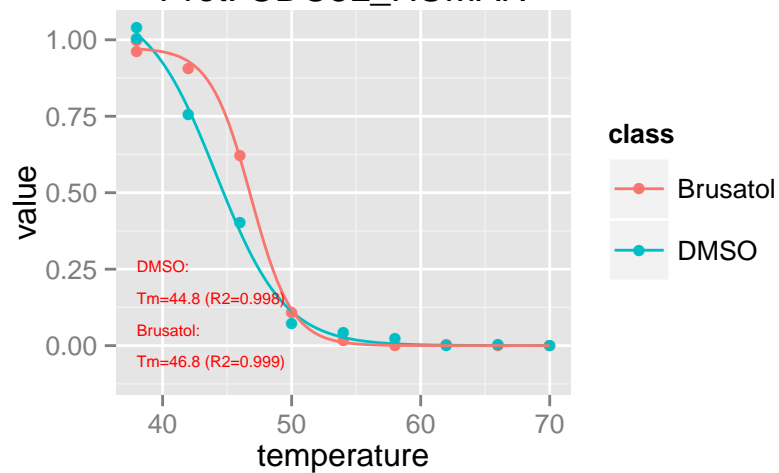

Prot: CDC73\_HUMAN

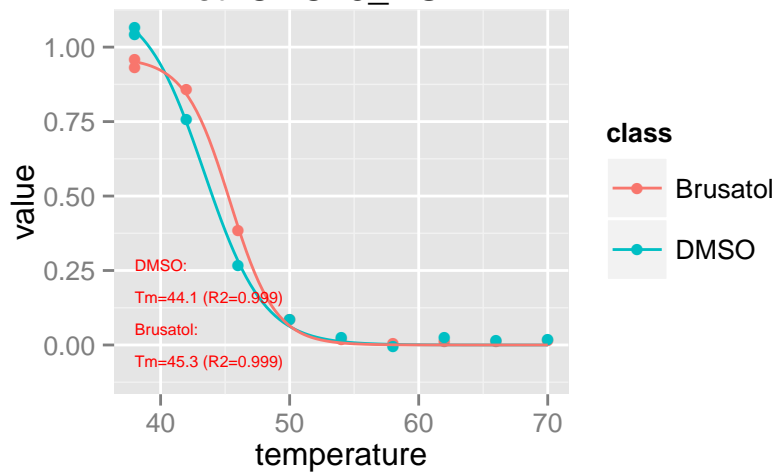

Prot: CDCA3\_HUMAN

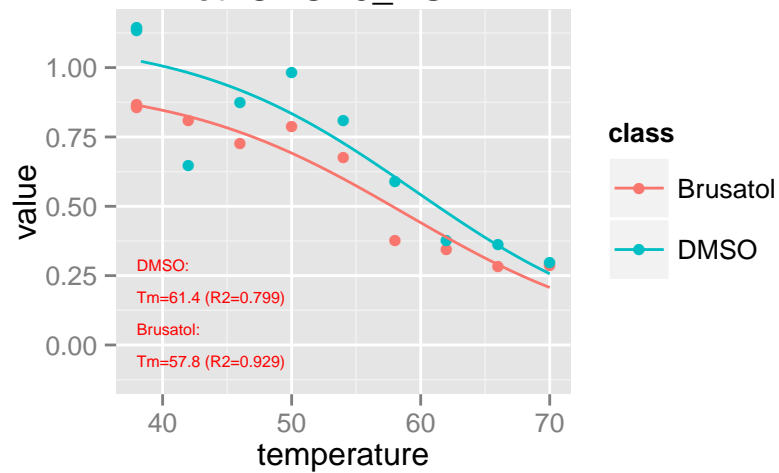

Prot: CDK1\_HUMAN

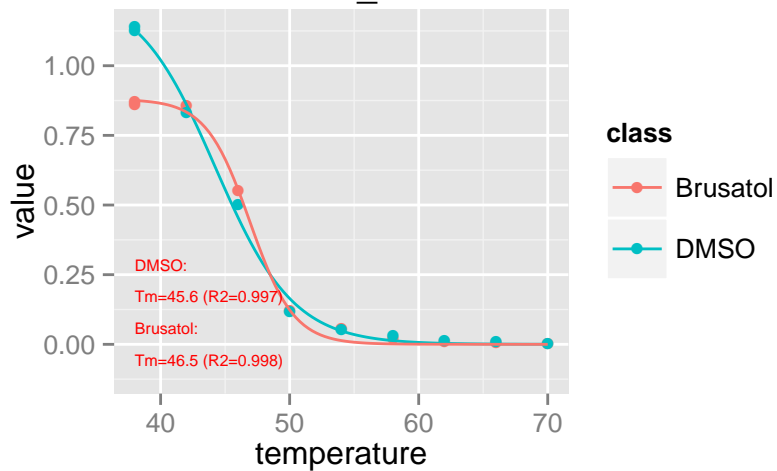

Prot: CDK12\_HUMAN

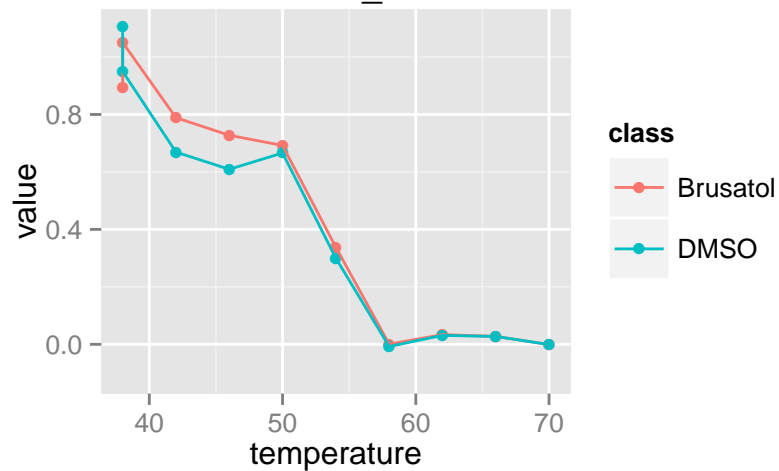

Prot: CDK2\_HUMAN

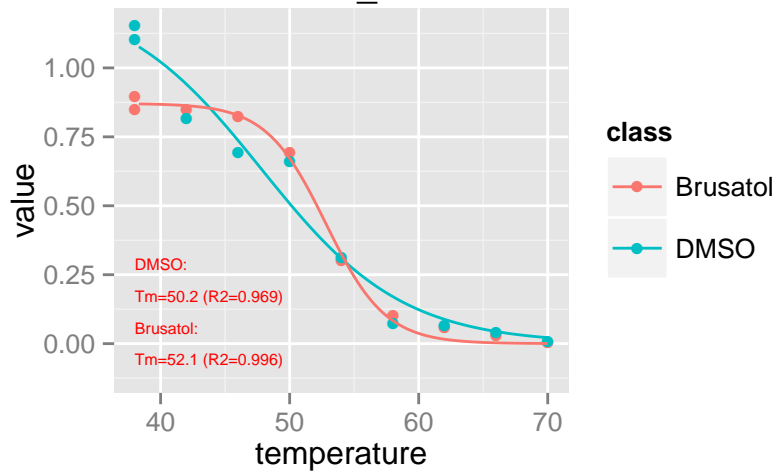

Prot: CDK5\_HUMAN

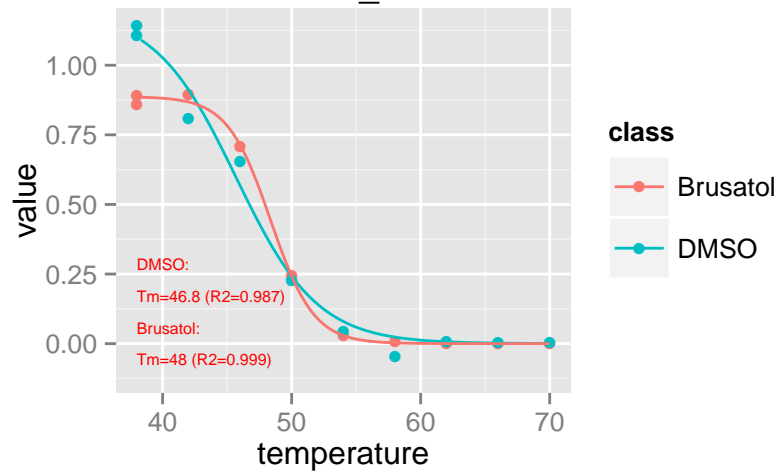

Prot: CDK6\_HUMAN

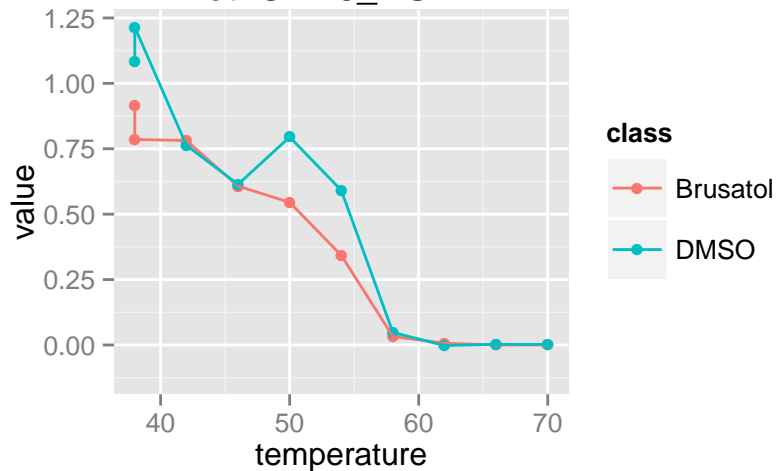

Prot: CDK7\_HUMAN

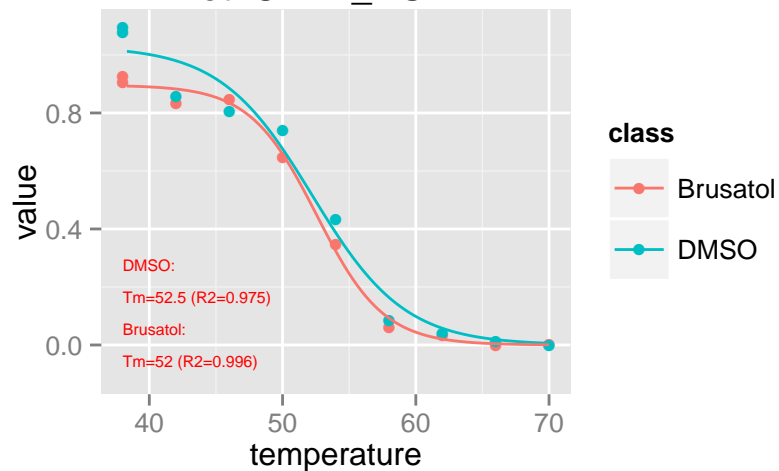

Prot: CDK9\_HUMAN

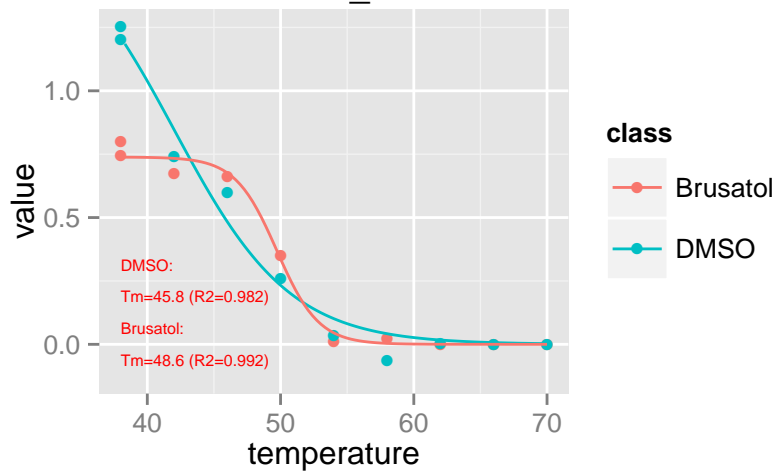

Prot: CDR2L\_HUMAN

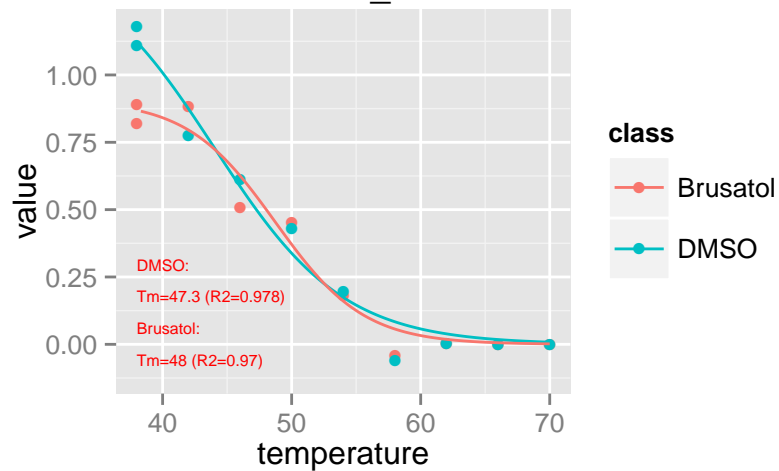

Prot: CDV3\_HUMAN

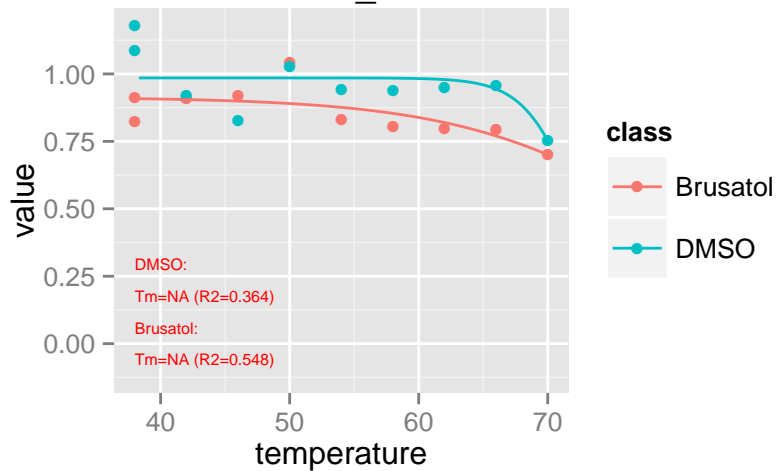

Prot: CE022\_HUMAN

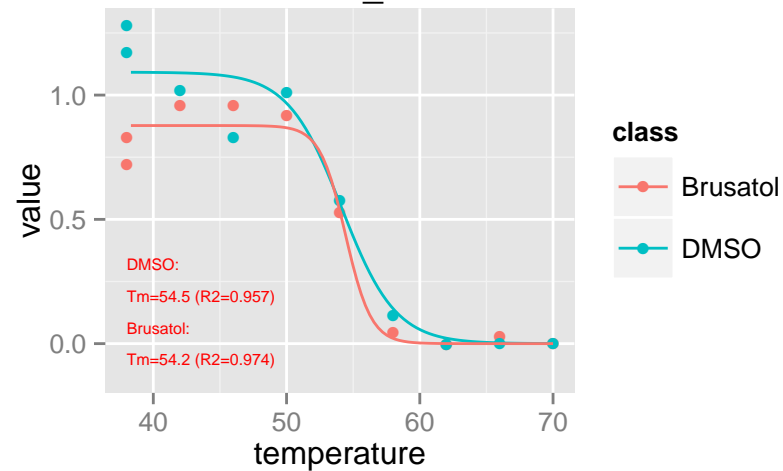

Prot: CE044\_HUMAN

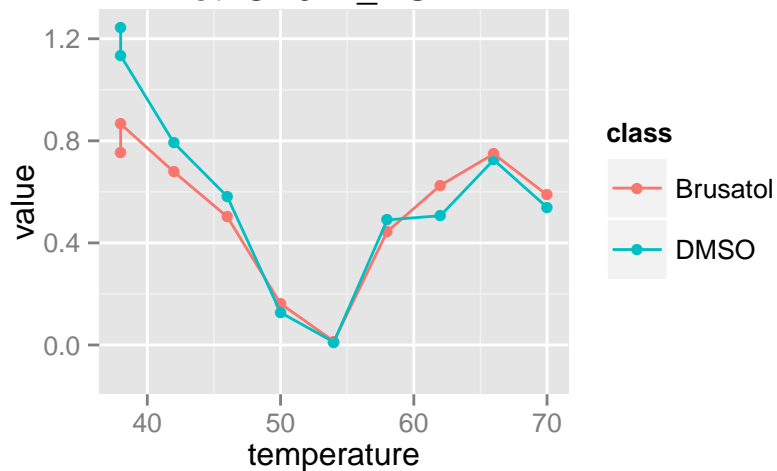

Prot: CE051\_HUMAN

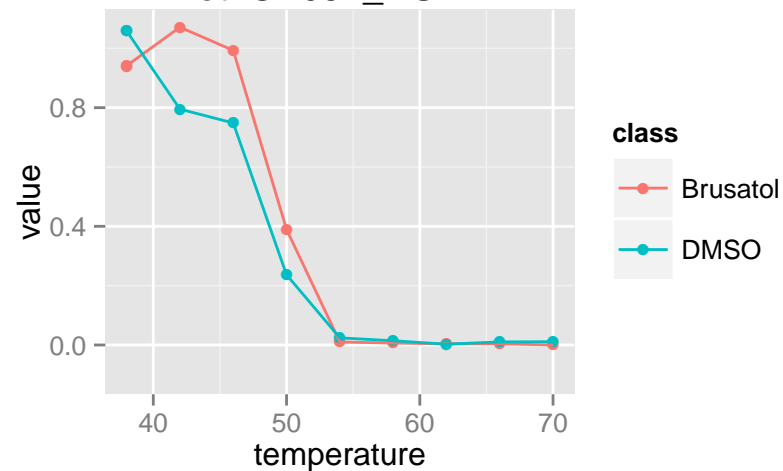

Prot: CE170\_HUMAN

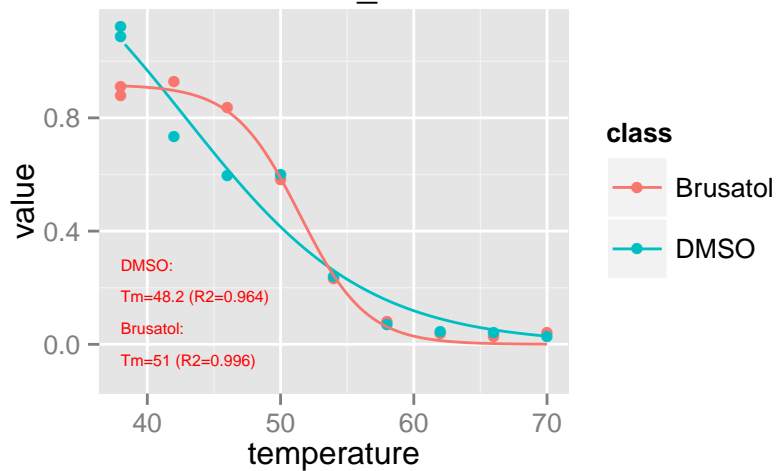

Prot: CECR5\_HUMAN

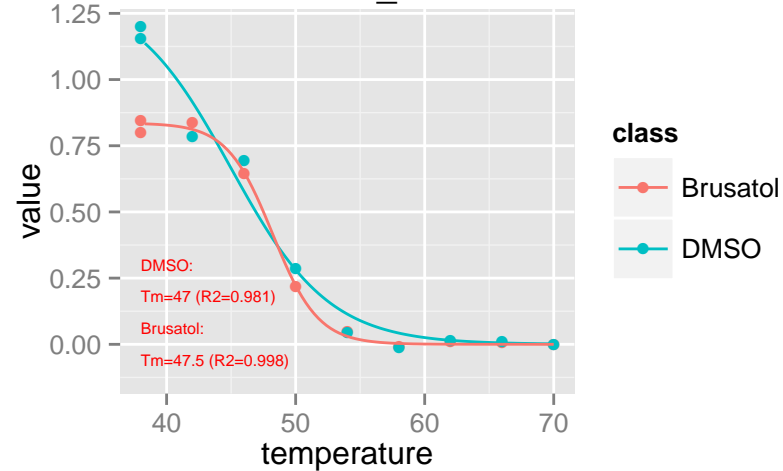

Prot: CELF1\_HUMAN

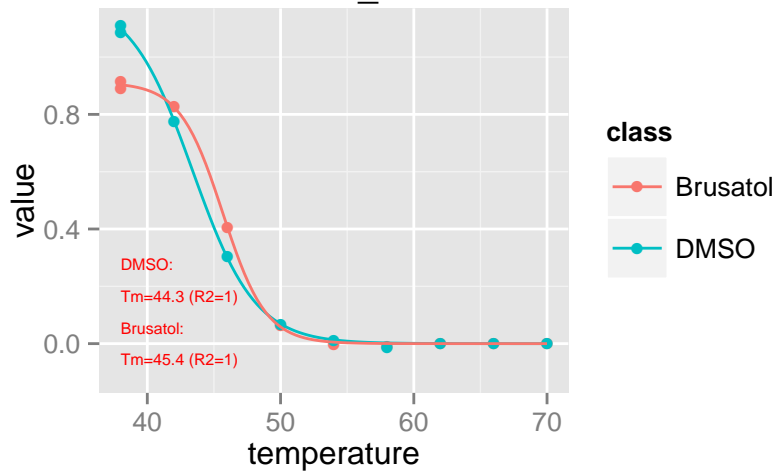

Prot: CENPS\_HUMAN

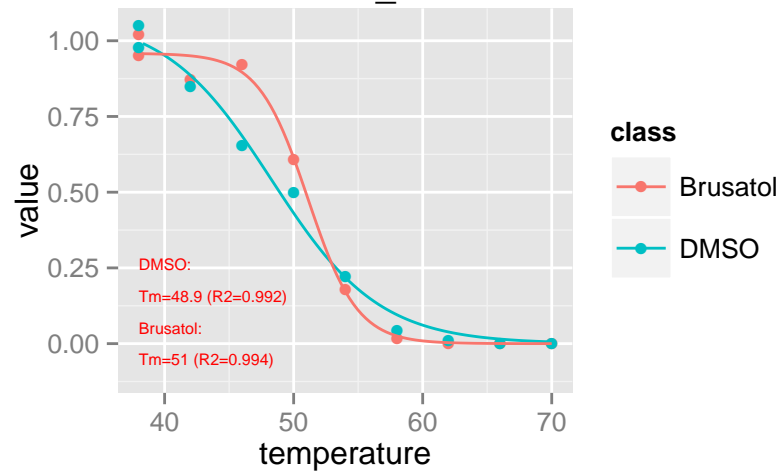

Prot: CEP41\_HUMAN

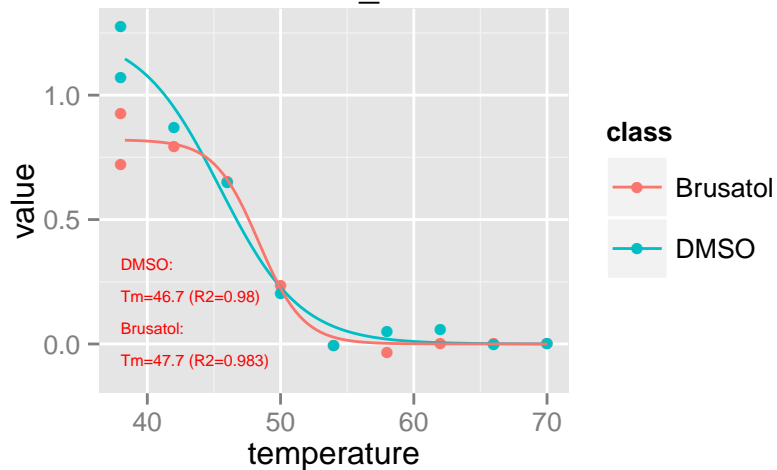

Prot: CEP97\_HUMAN

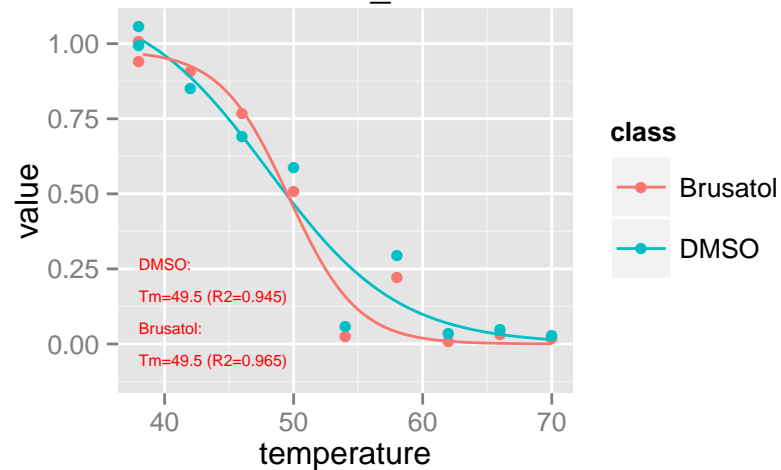

Prot: CES1P\_HUMAN

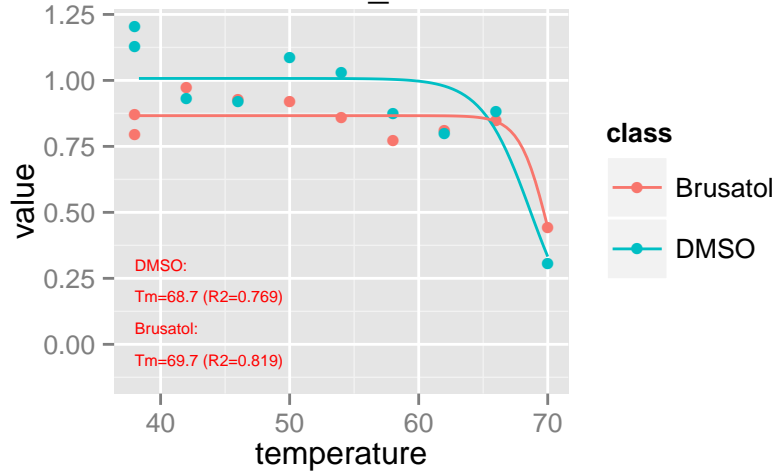

Prot: CETN2\_HUMAN

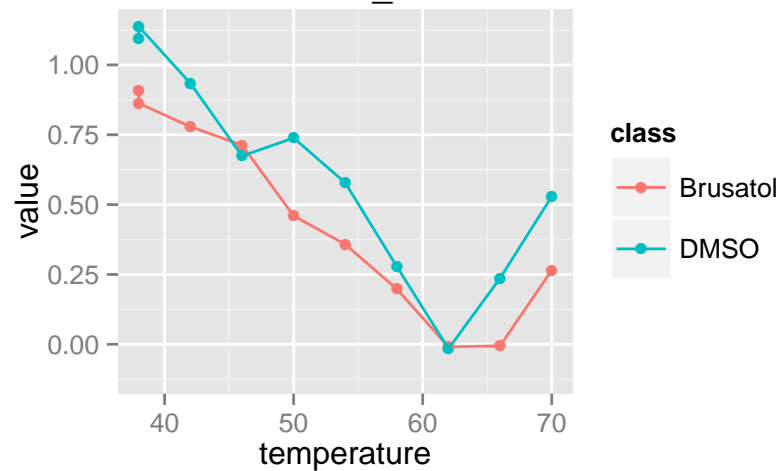

Prot: CF115\_HUMAN

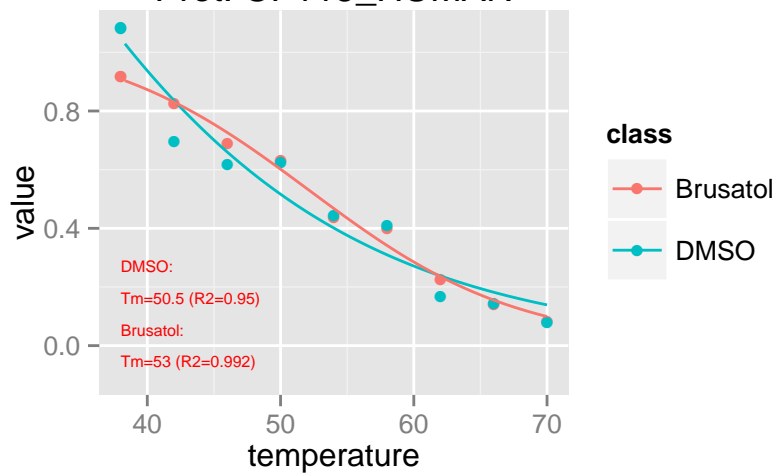

Prot: CF211\_HUMAN

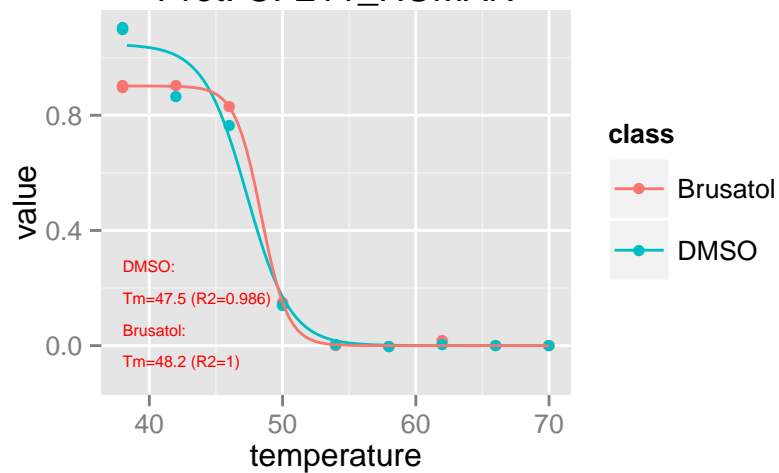

Prot: CFDP1\_HUMAN

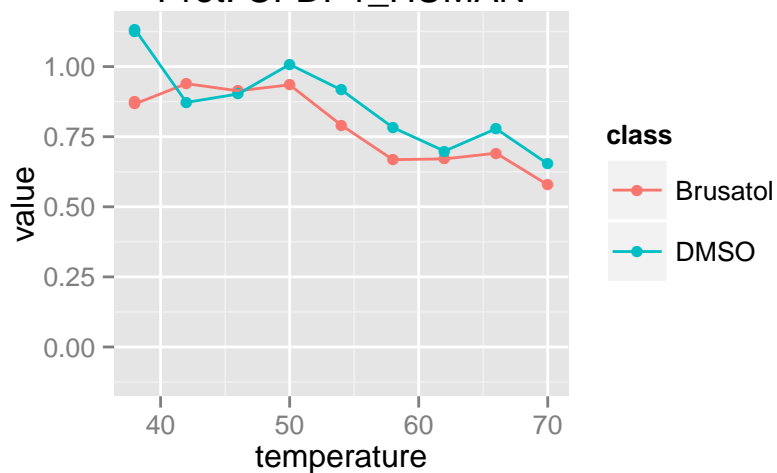

Prot: CG050\_HUMAN

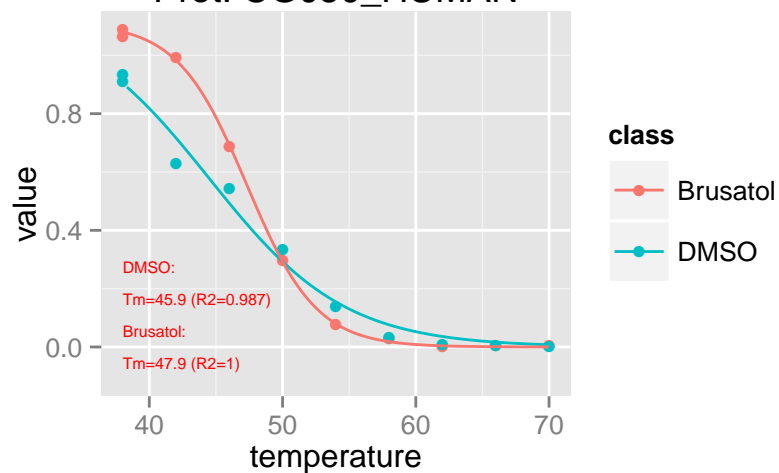

Prot: CH042\_HUMAN

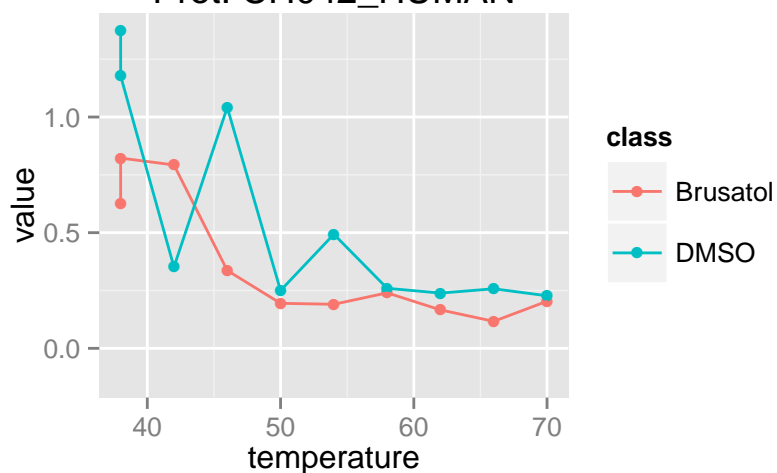

Prot: CH047\_HUMAN

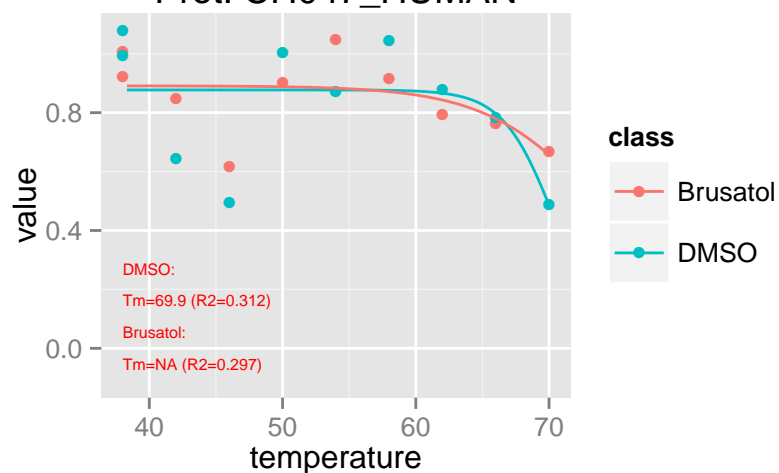

Prot: CH082\_HUMAN

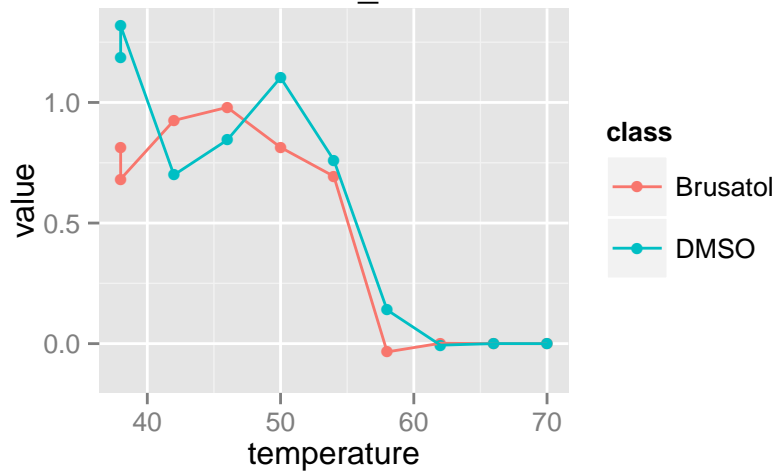

Prot: CH10\_HUMAN

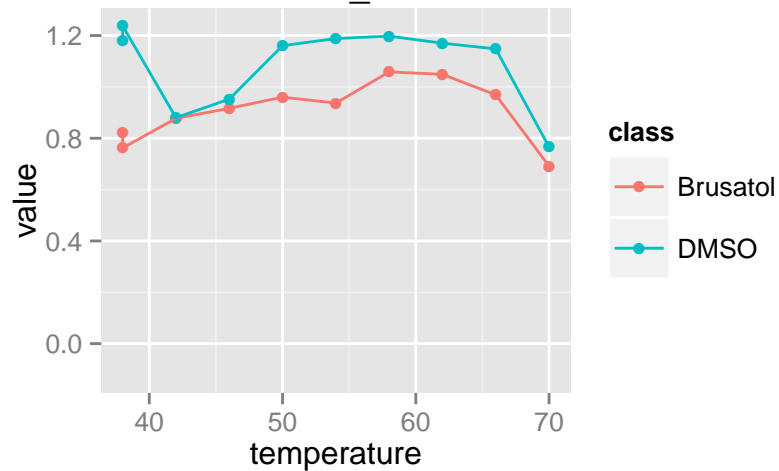

Prot: CH60\_HUMAN

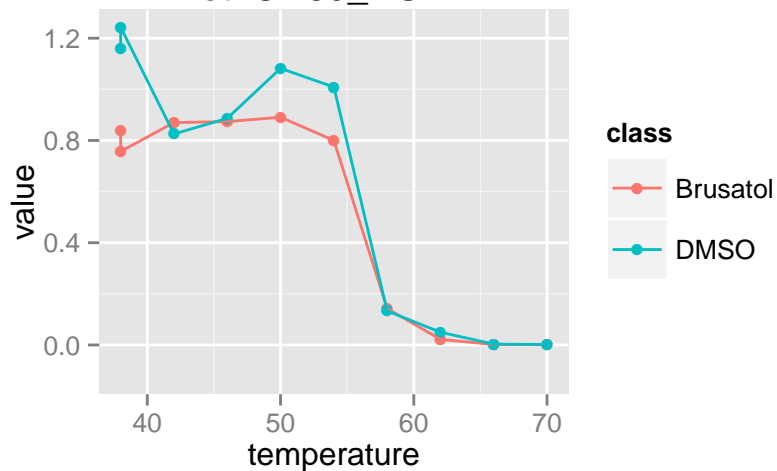

Prot: CHAC2\_HUMAN

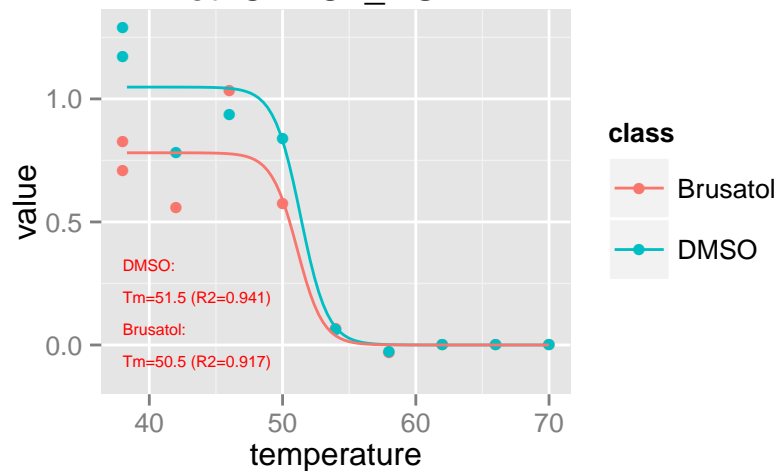

Prot: CHCH2\_HUMAN

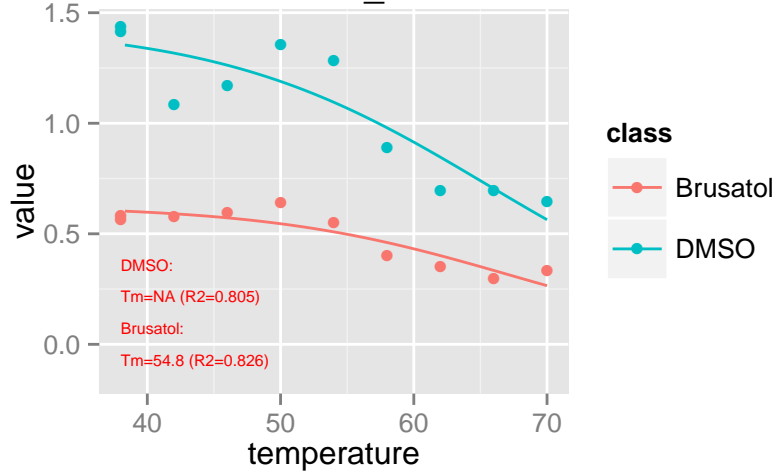

Prot: CHCH3\_HUMAN

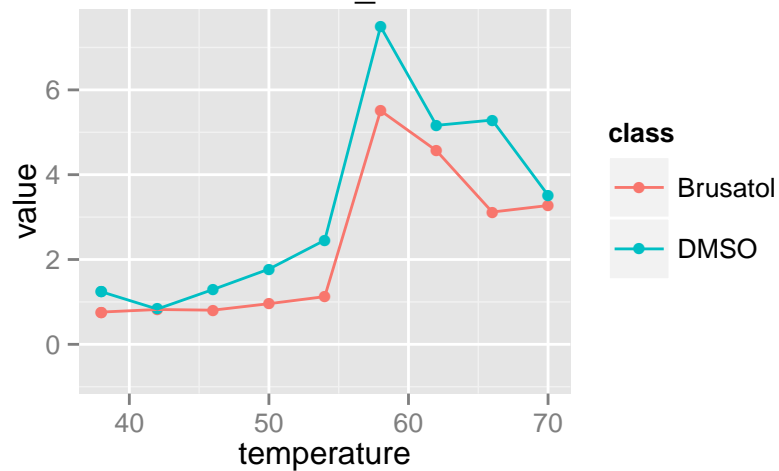

Prot: CHCH5\_HUMAN

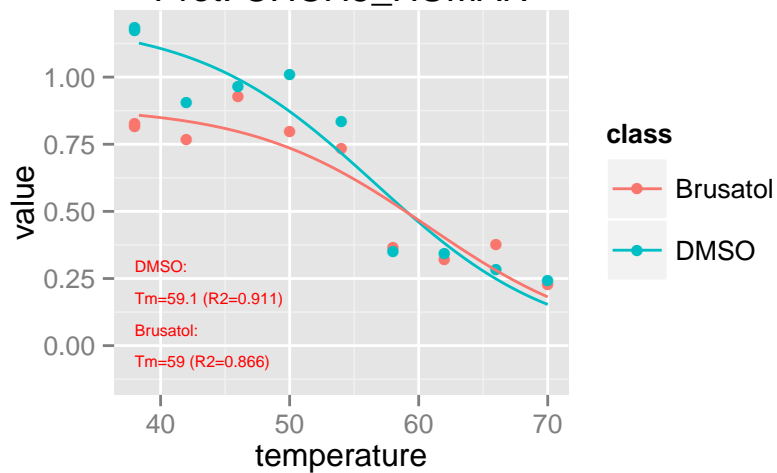

Prot: CHCH8\_HUMAN

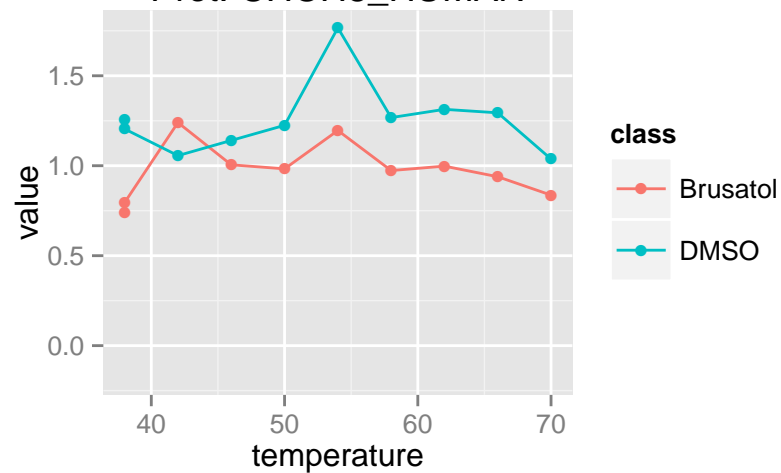

Prot: CHD1L\_HUMAN

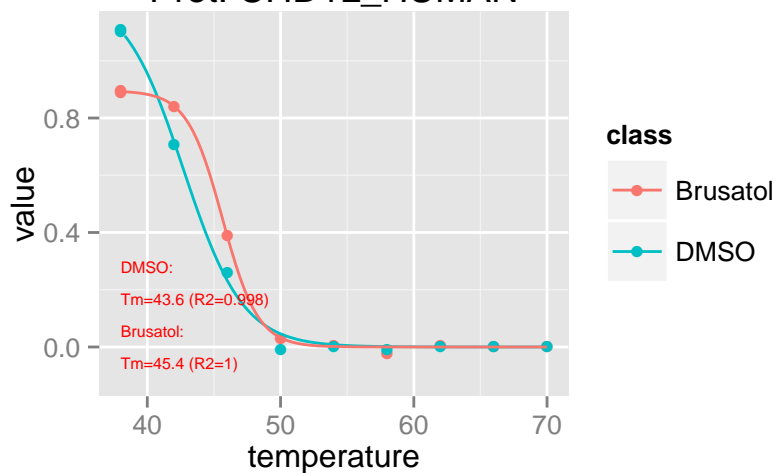

Prot: CHD3\_HUMAN

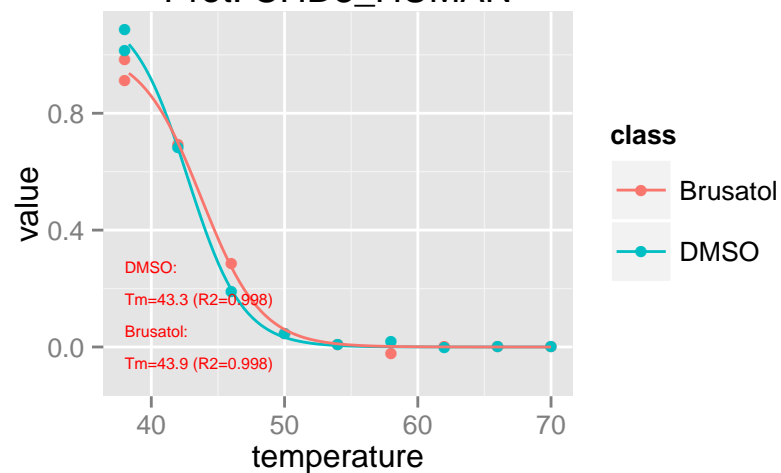

Prot: CHD4\_HUMAN

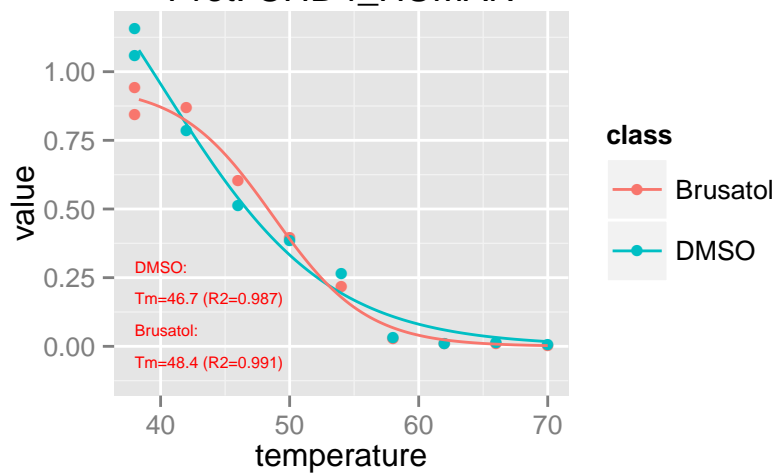

Prot: CHIP\_HUMAN

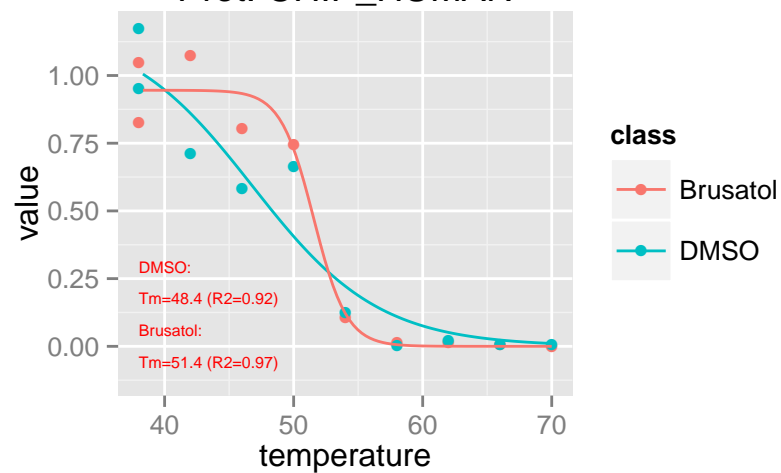



Prot: CHK2\_HUMAN

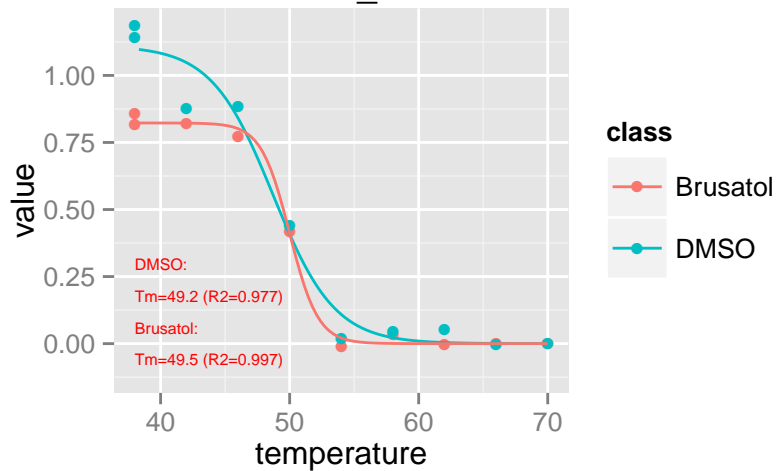

Prot: CHKA\_HUMAN

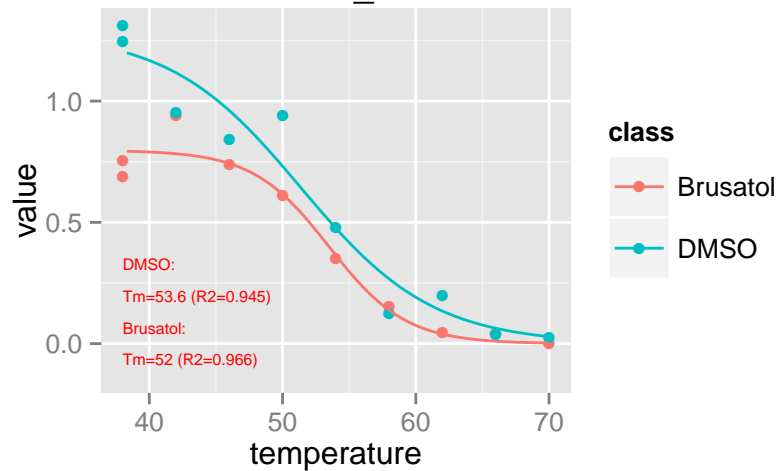

Prot: CHM1A\_HUMAN

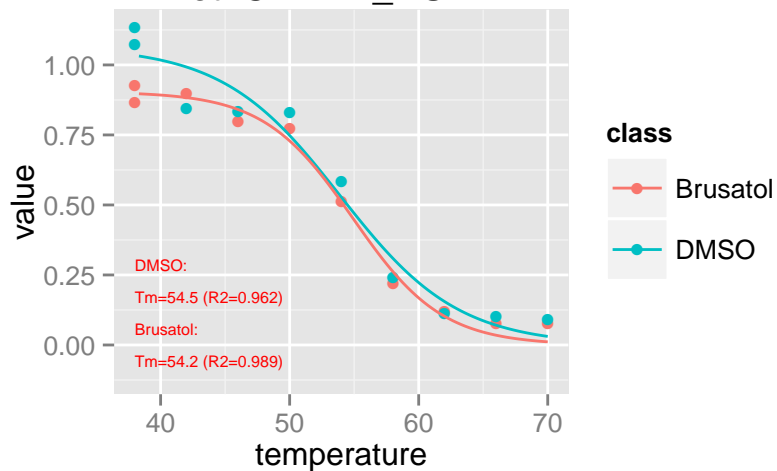

Prot: CHM1B\_HUMAN

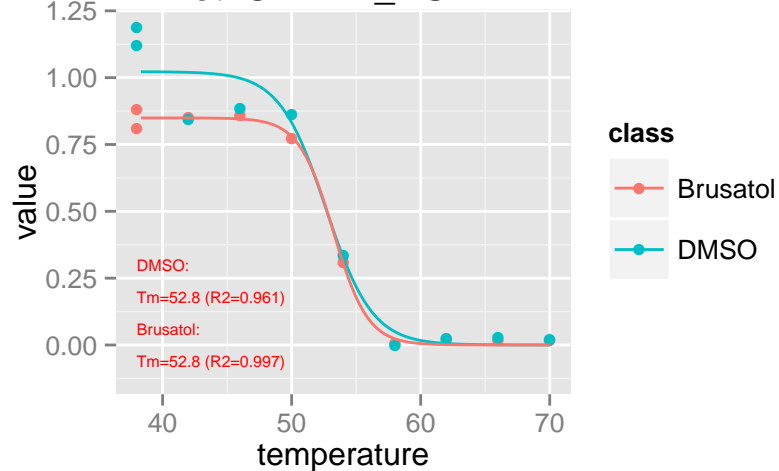

Prot: CHM2A\_HUMAN

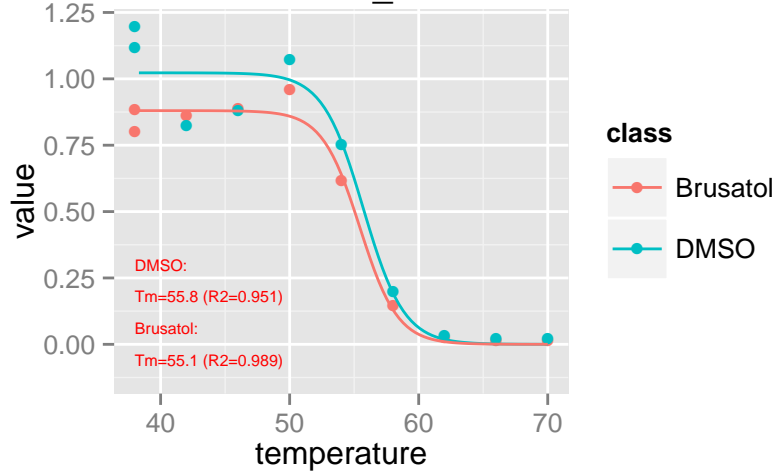

Prot: CHM2B\_HUMAN

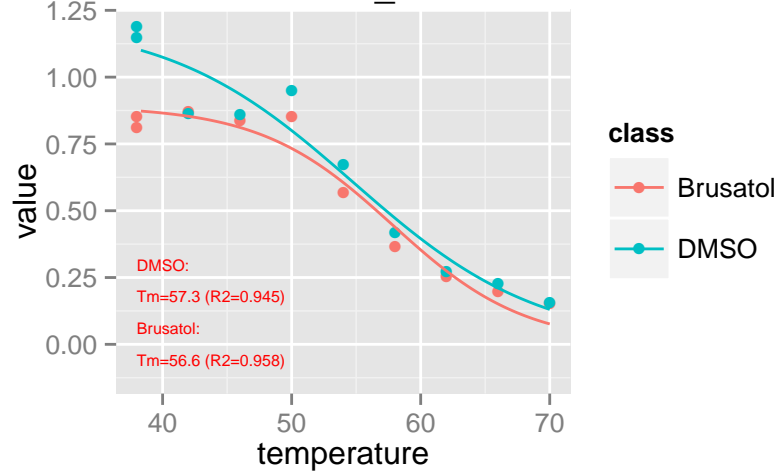

Prot: CHM4A\_HUMAN

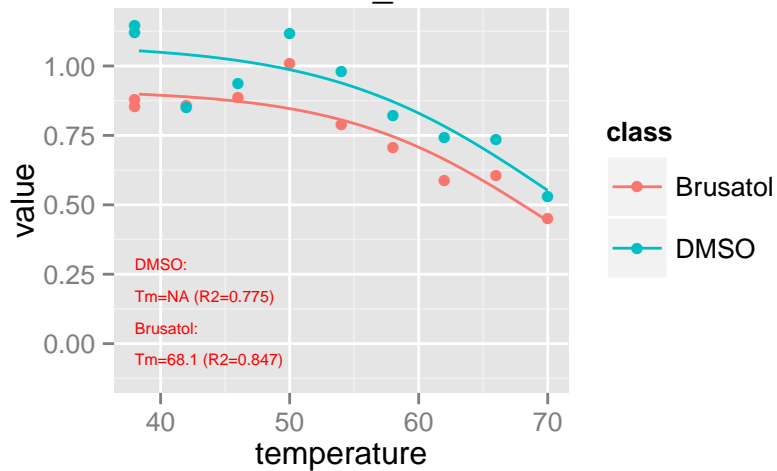

Prot: CHM4B\_HUMAN

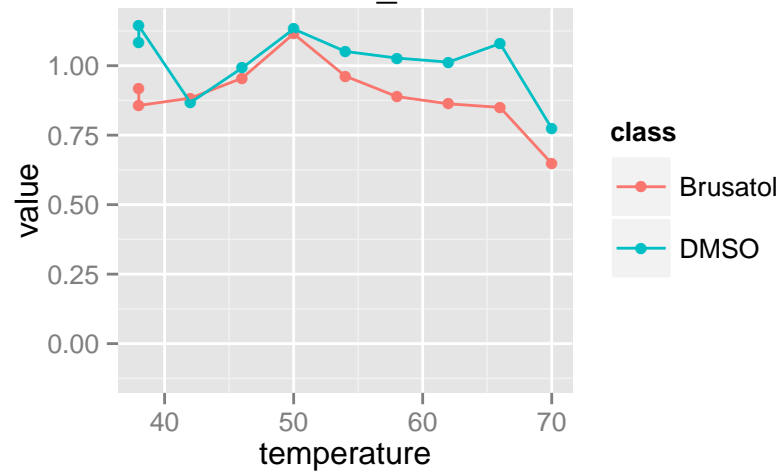

Prot: CHMP3\_HUMAN

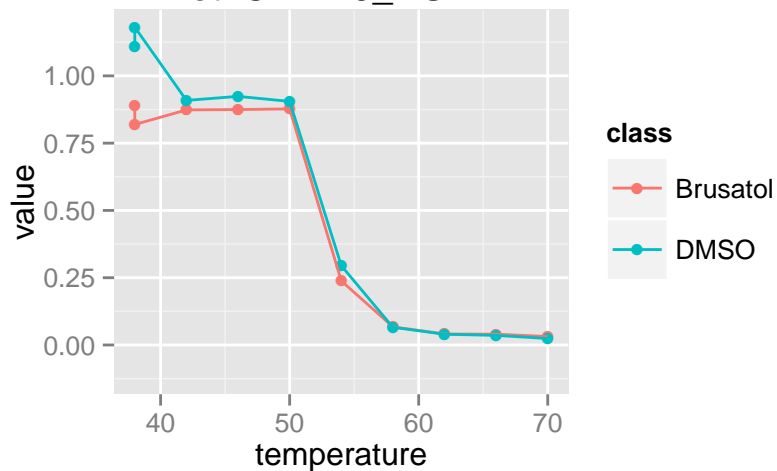

Prot: CHMP5\_HUMAN

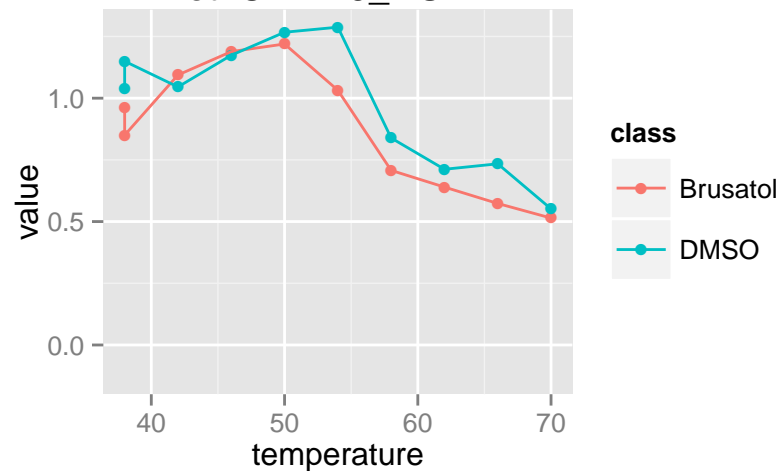

Prot: CHMP7\_HUMAN

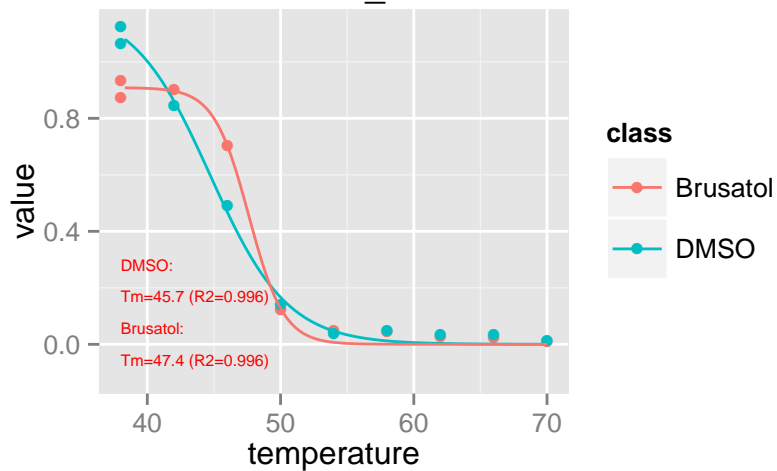

Prot: CHRC1\_HUMAN

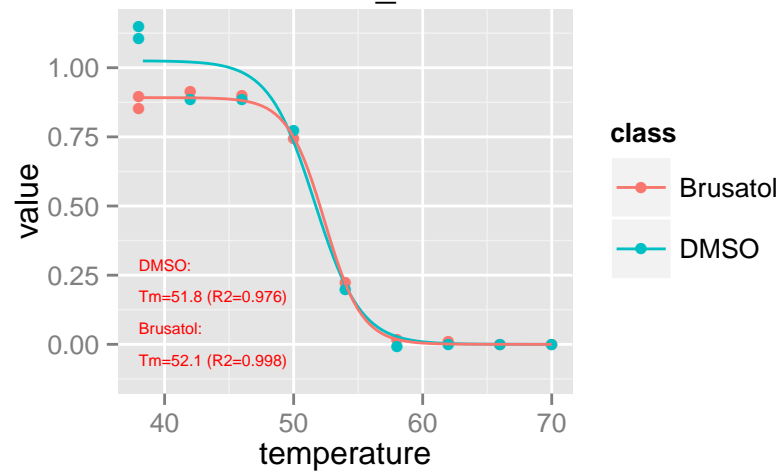

Prot: CHRD1\_HUMAN

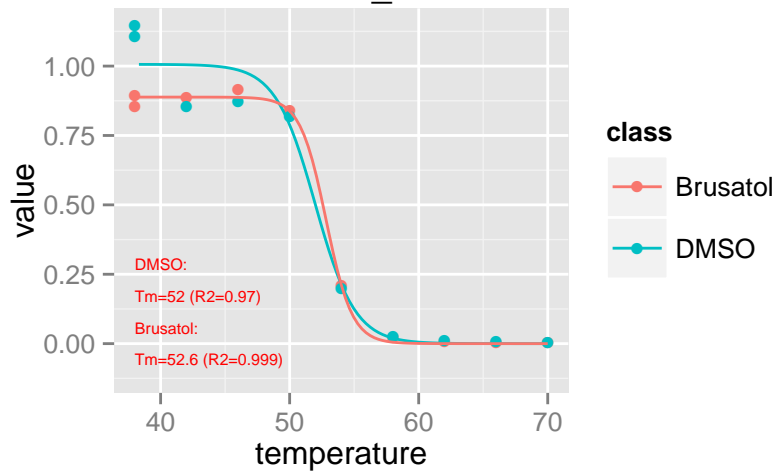

Prot: CHSP1\_HUMAN

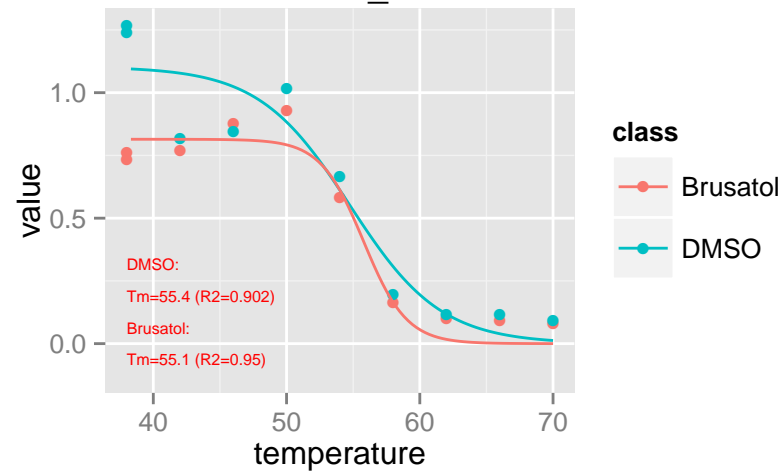

Prot: CHUR\_HUMAN

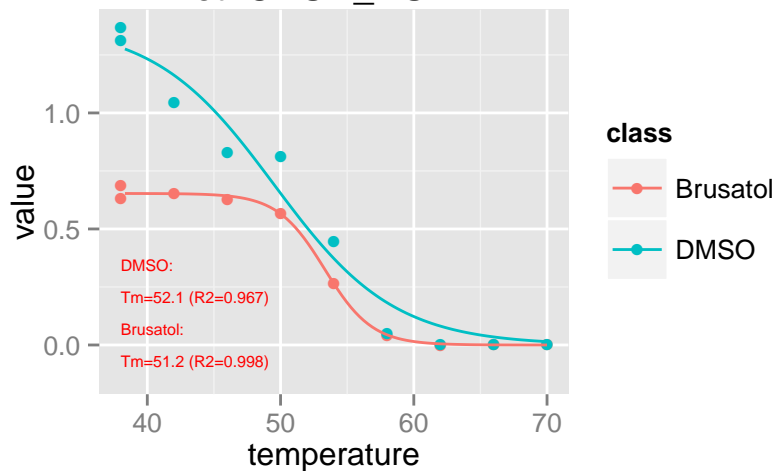

Prot: CI023\_HUMAN

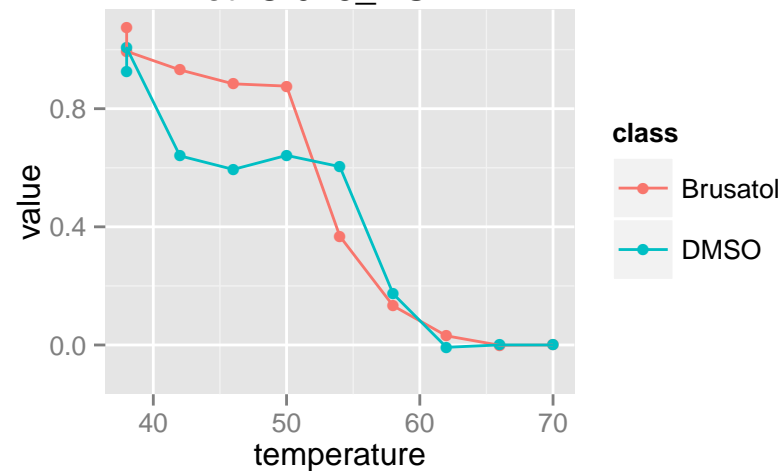

Prot: CI064\_HUMAN

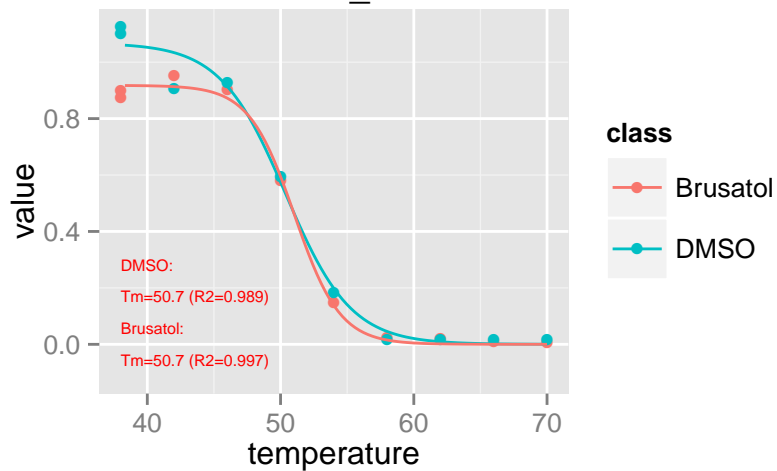

Prot: CI078\_HUMAN

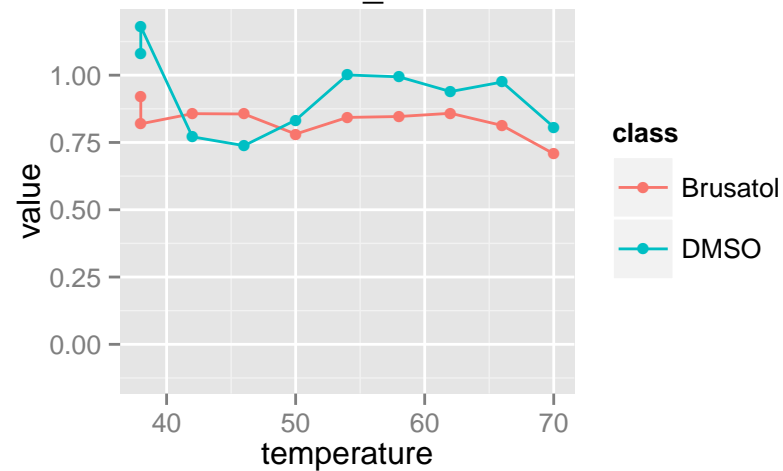

Prot: CI142\_HUMAN

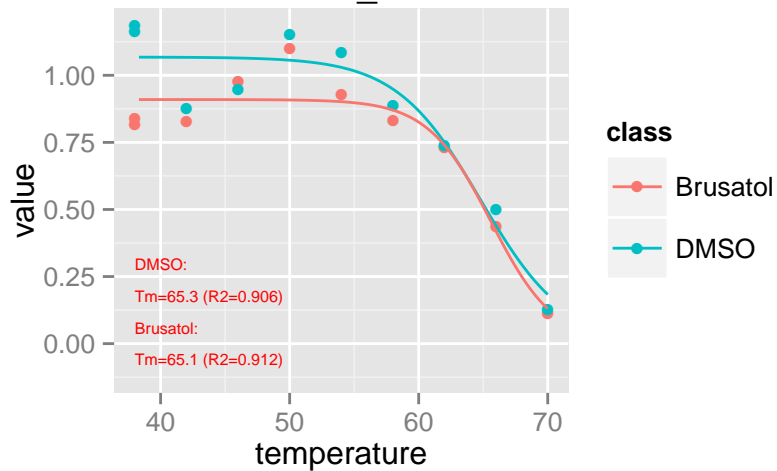

Prot: CIAO1\_HUMAN

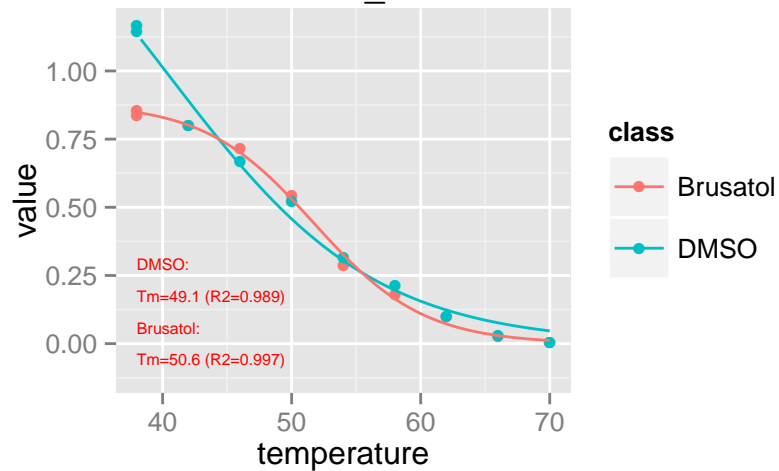

Prot: CIC\_HUMAN

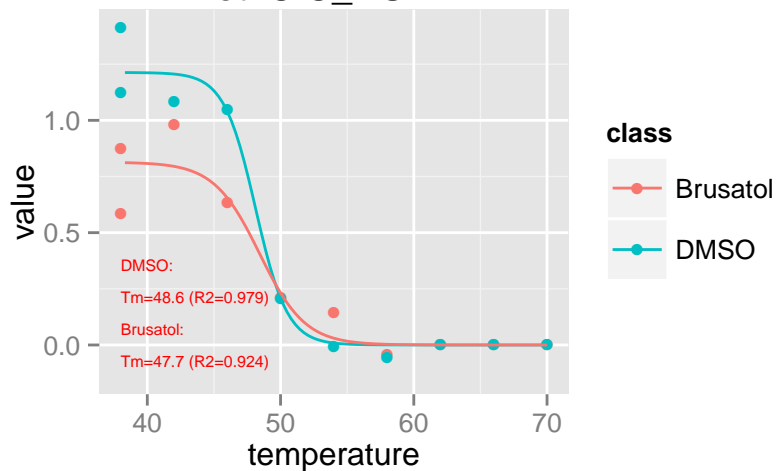

Prot: CIP2A\_HUMAN

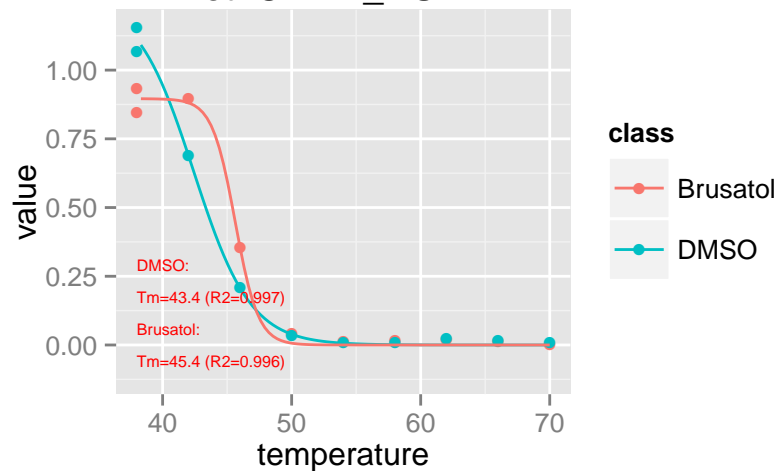

Prot: CIP4\_HUMAN

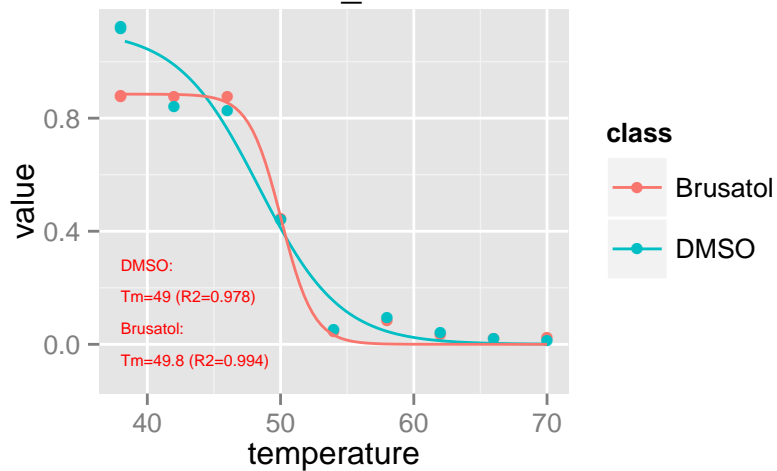

Prot: CIRBP\_HUMAN

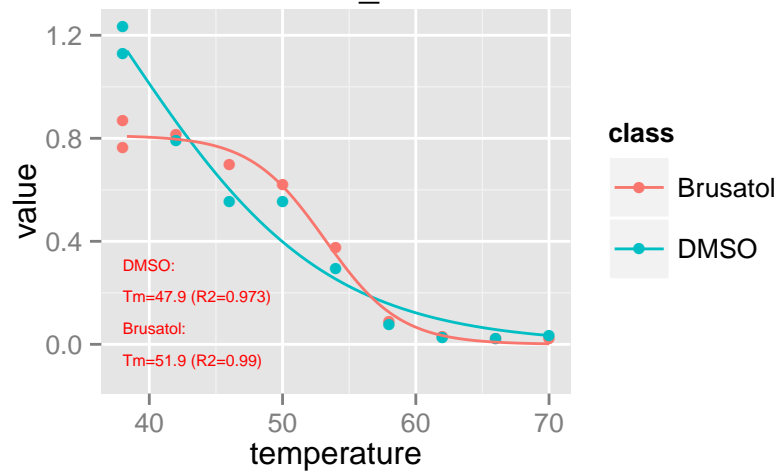

Prot: CISOY\_HUMAN

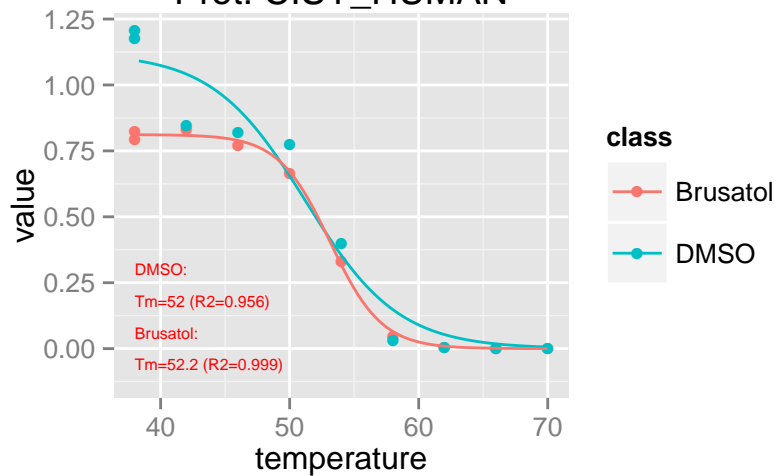

Prot: CJ047\_HUMAN

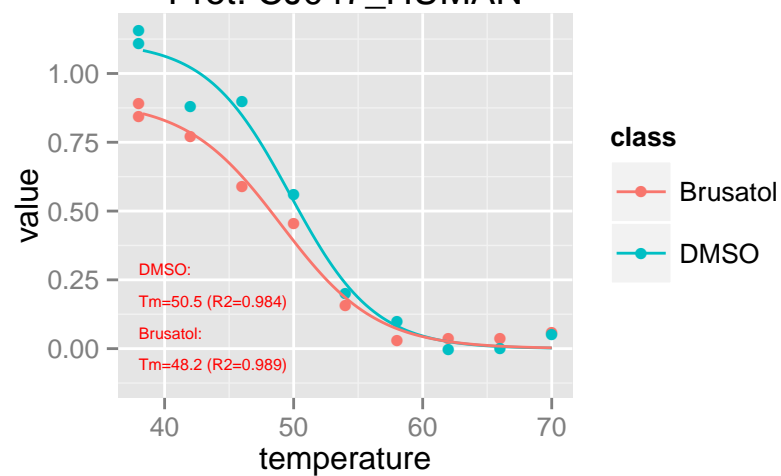

Prot: CJ076\_HUMAN

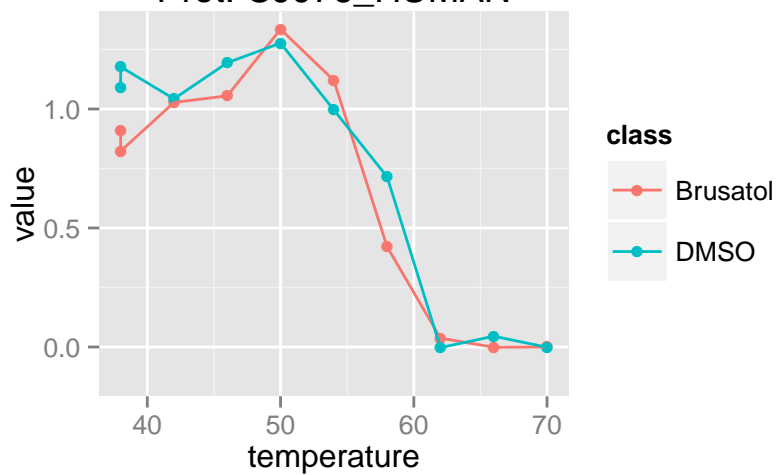

Prot: CK054\_HUMAN

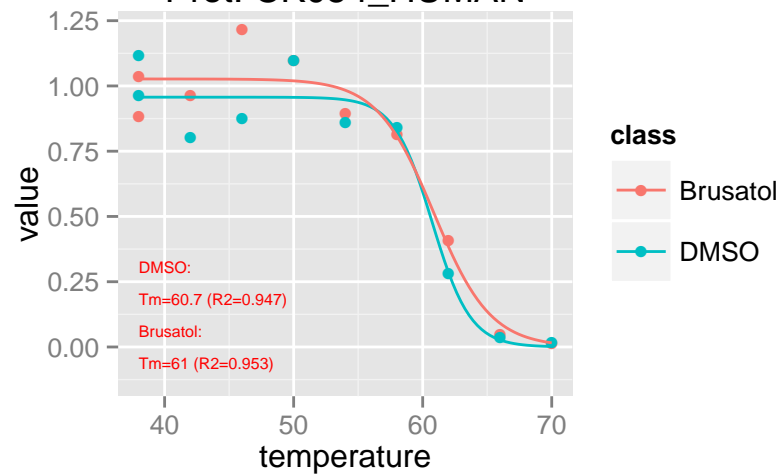

Prot: CK067\_HUMAN

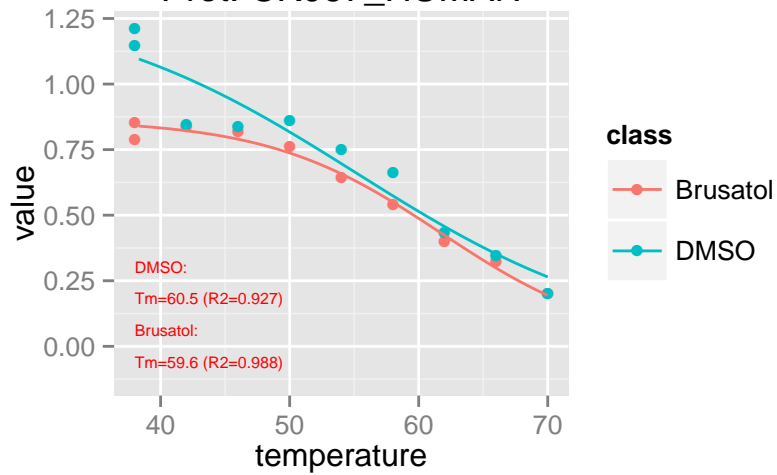

Prot: CKAP5\_HUMAN

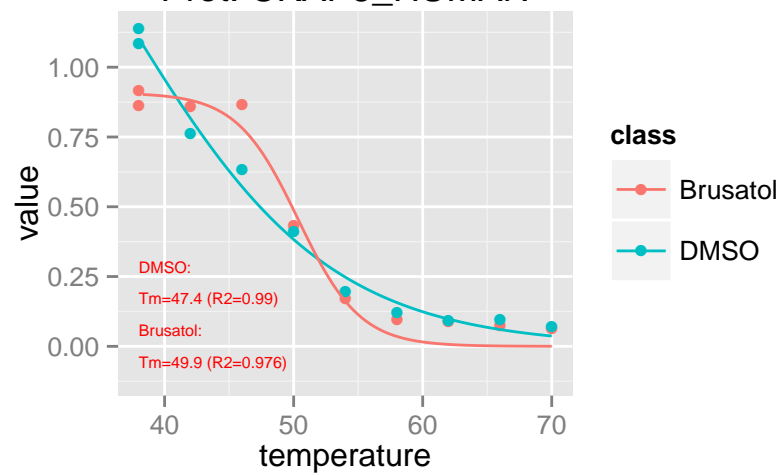

Prot: CKS1\_HUMAN

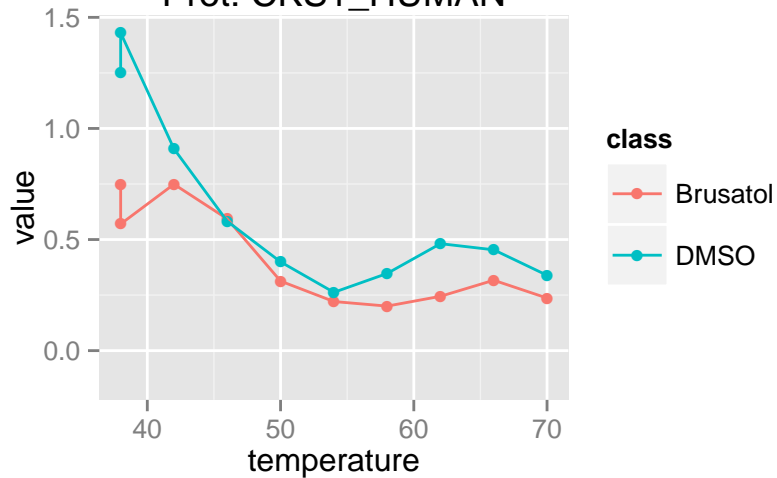

Prot: CL023\_HUMAN

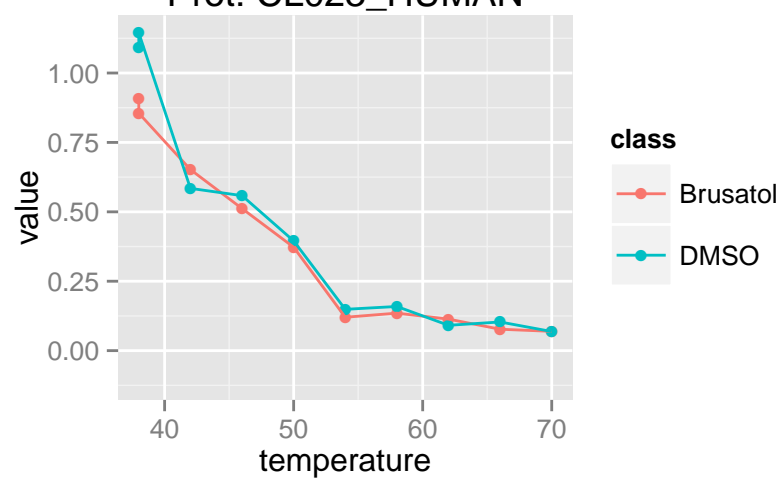

Prot: CL029\_HUMAN

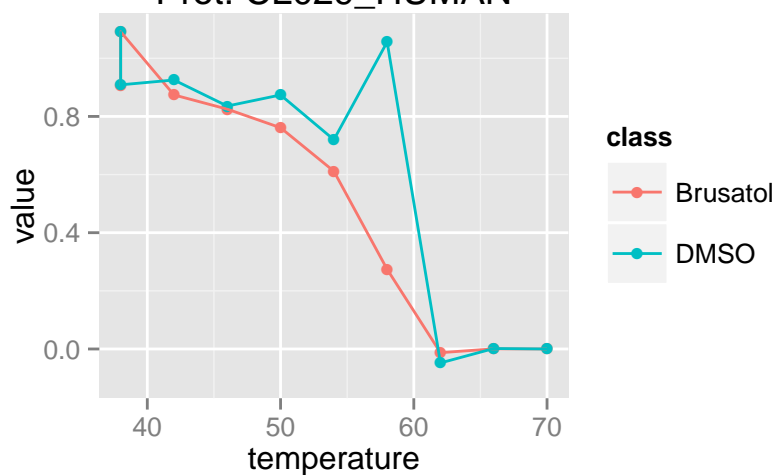

Prot: CL045\_HUMAN

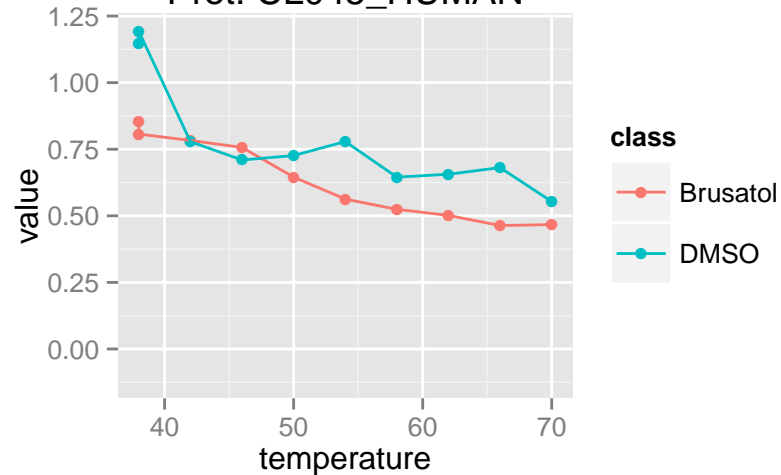

Prot: CLAP1\_HUMAN

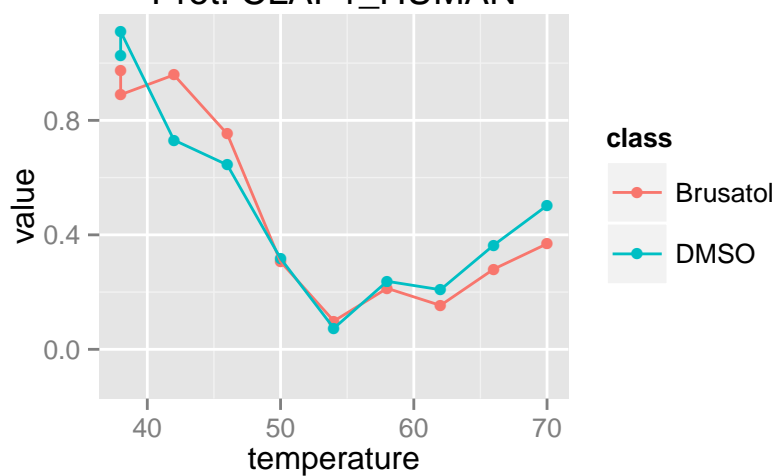

Prot: CLAP2\_HUMAN

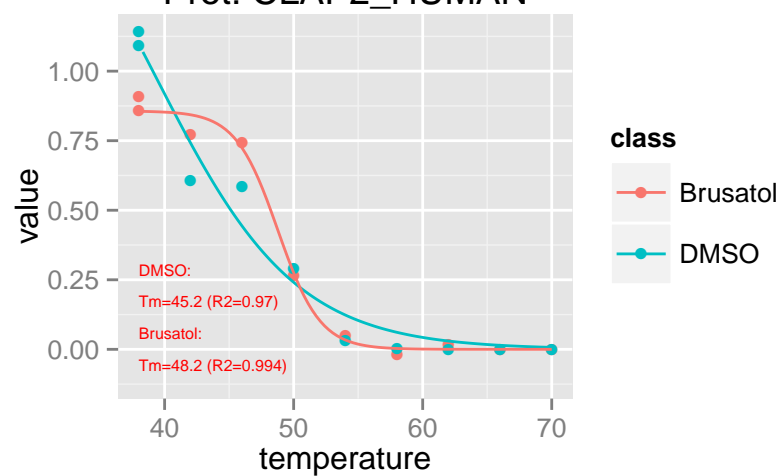

Prot: CLCA\_HUMAN

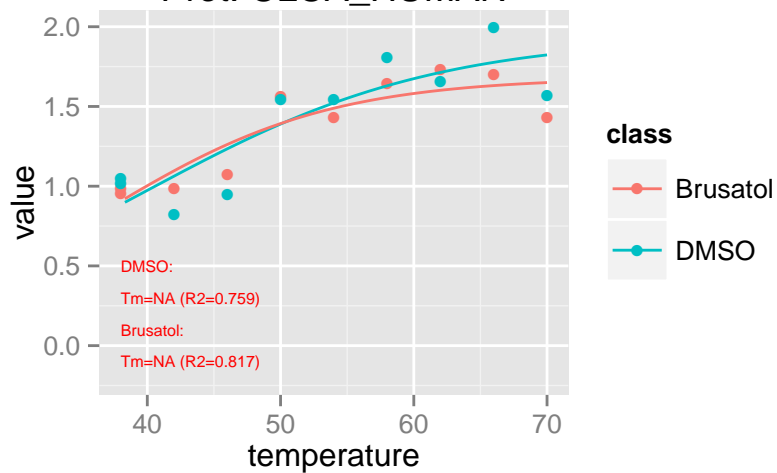

Prot: CLCB\_HUMAN

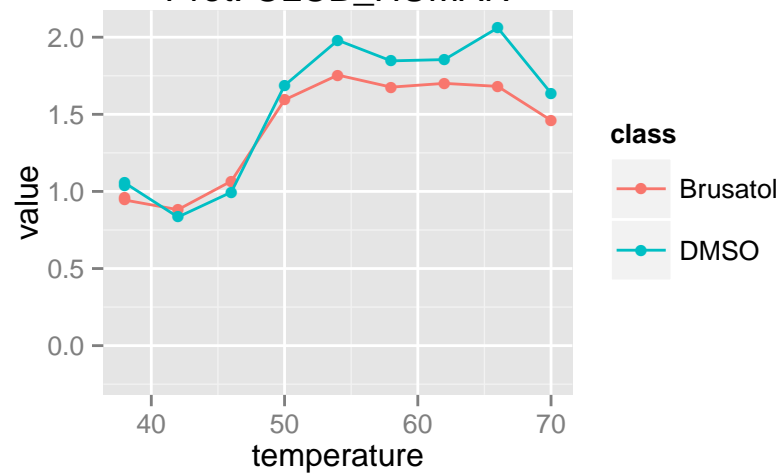

Prot: CLH1\_HUMAN

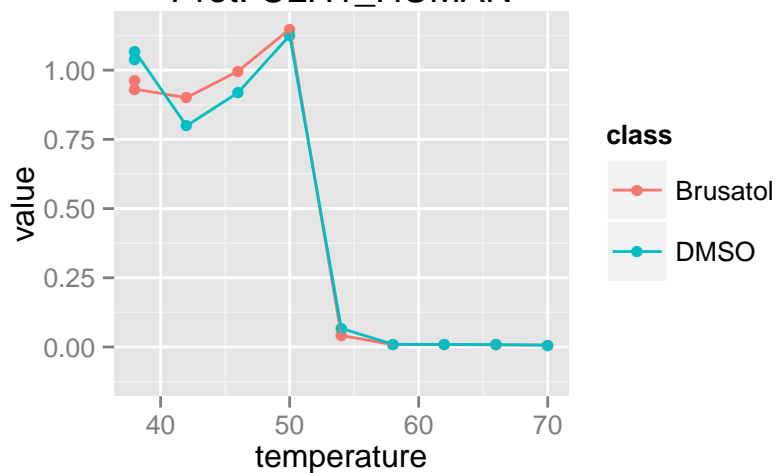

Prot: CLIC1\_HUMAN

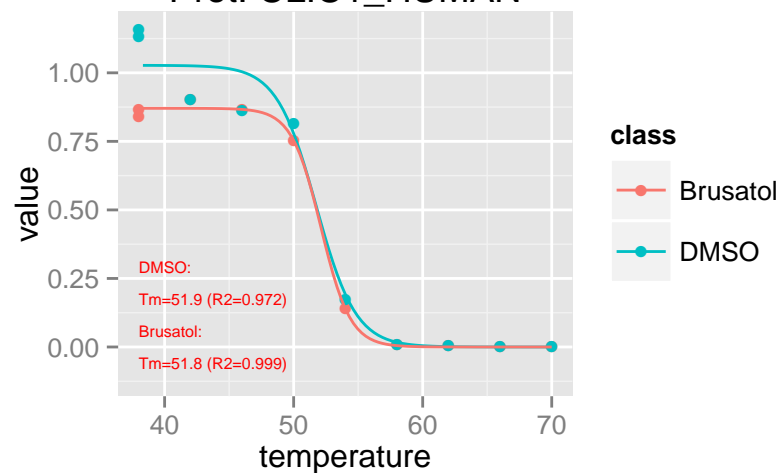

Prot: CLIC4\_HUMAN

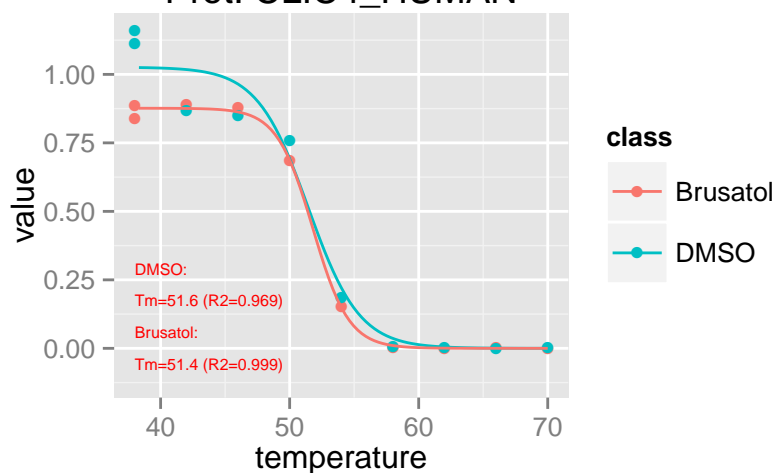

Prot: CLIP1\_HUMAN

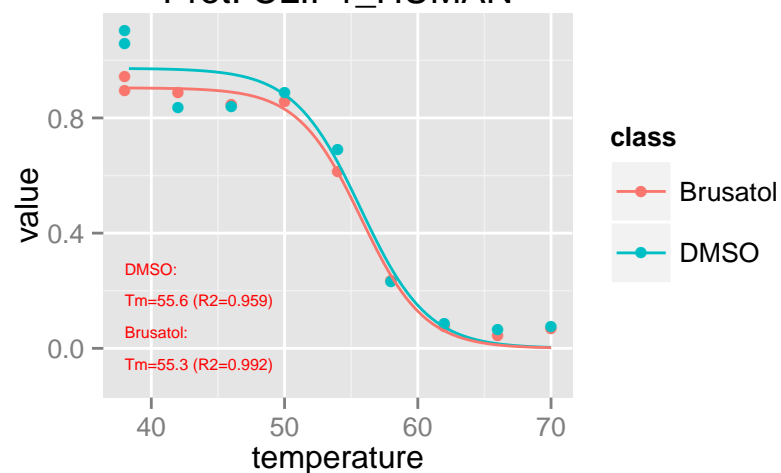

Prot: CLIP2\_HUMAN

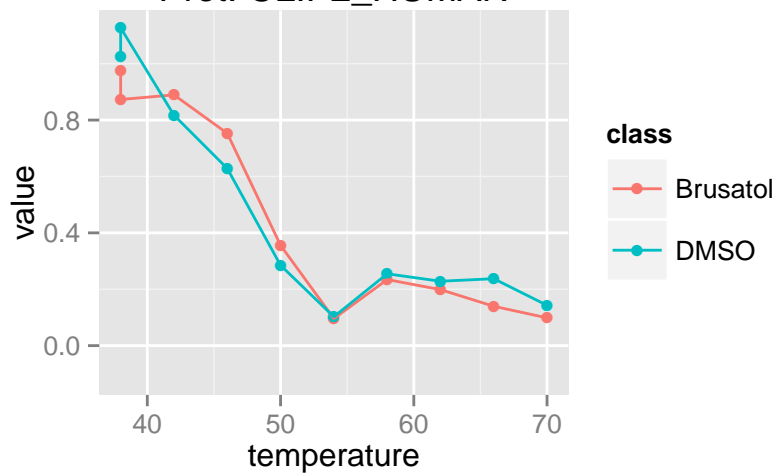

Prot: CLPP\_HUMAN

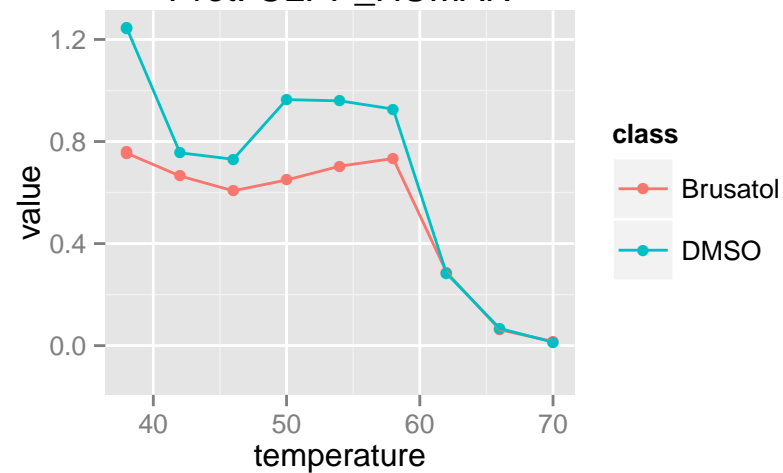

Prot: CLPX\_HUMAN

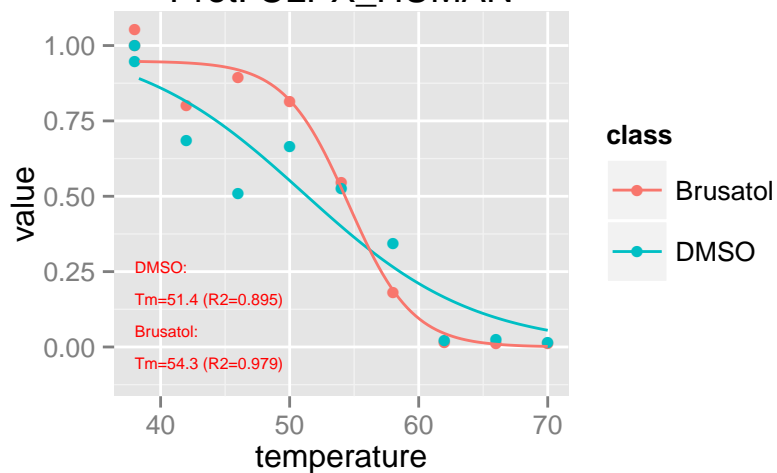

Prot: CLUS\_HUMAN

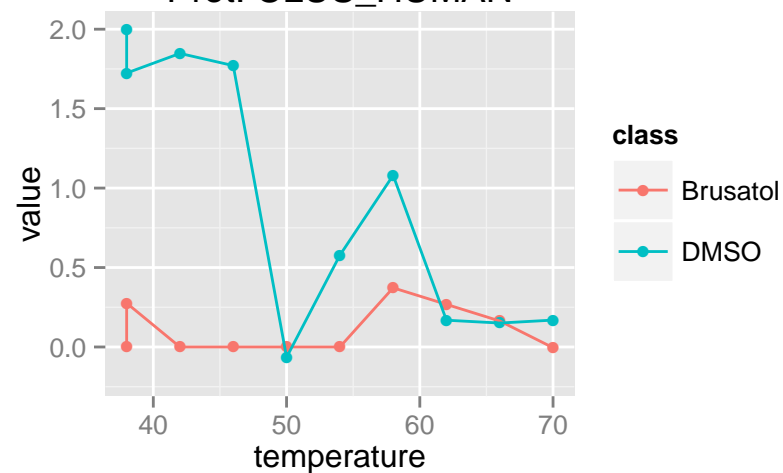

Prot: CMBL\_HUMAN

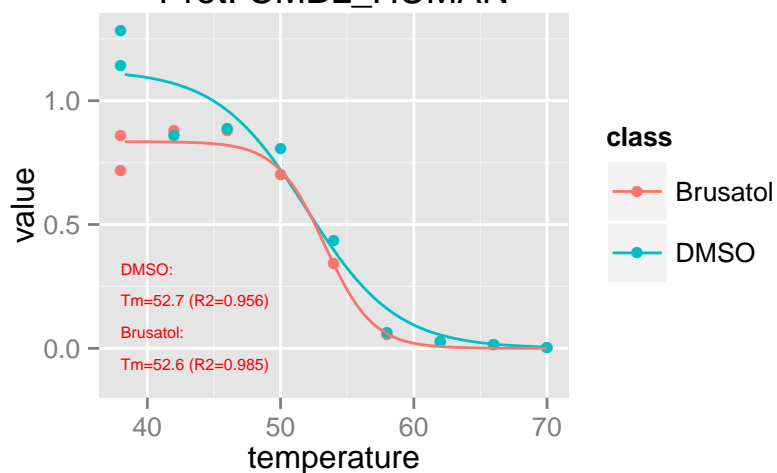

Prot: CMIP\_HUMAN

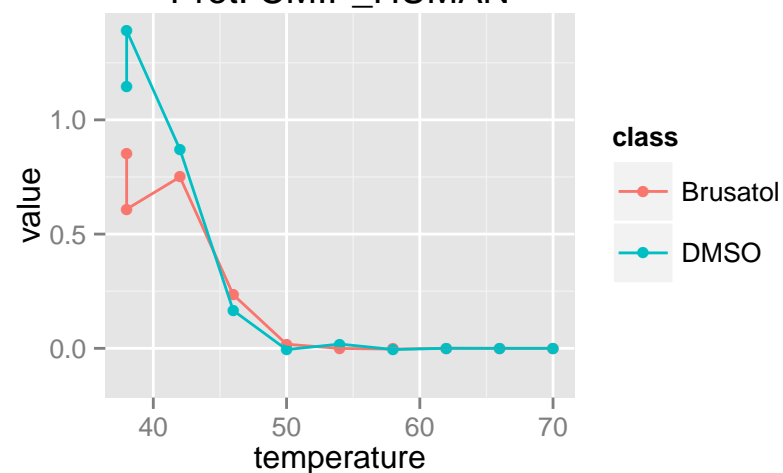



Prot: CN021\_HUMAN

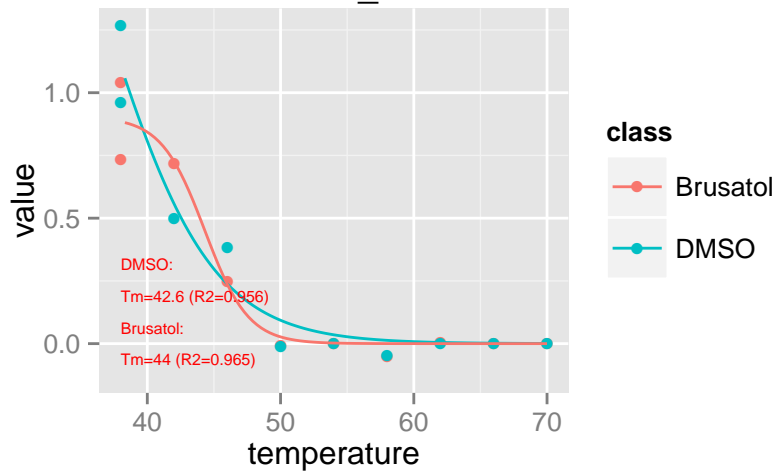

Prot: CN142\_HUMAN

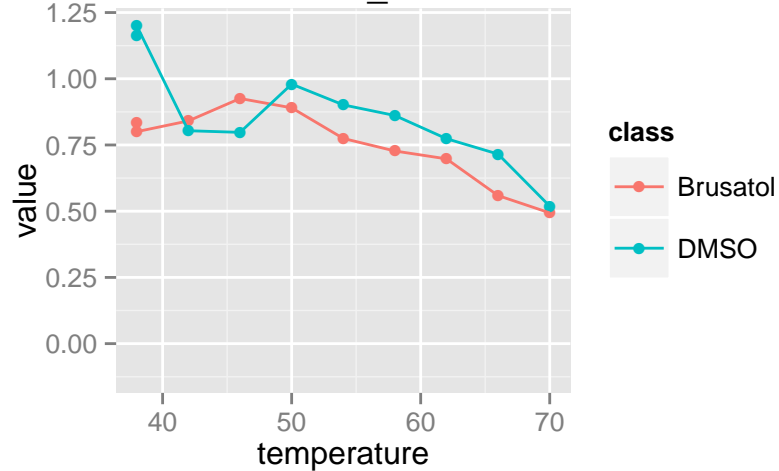

Prot: CN166\_HUMAN

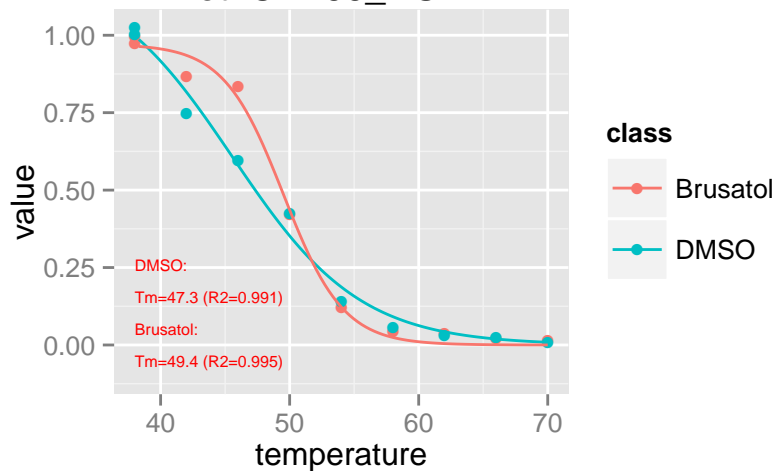

Prot: CN37\_HUMAN

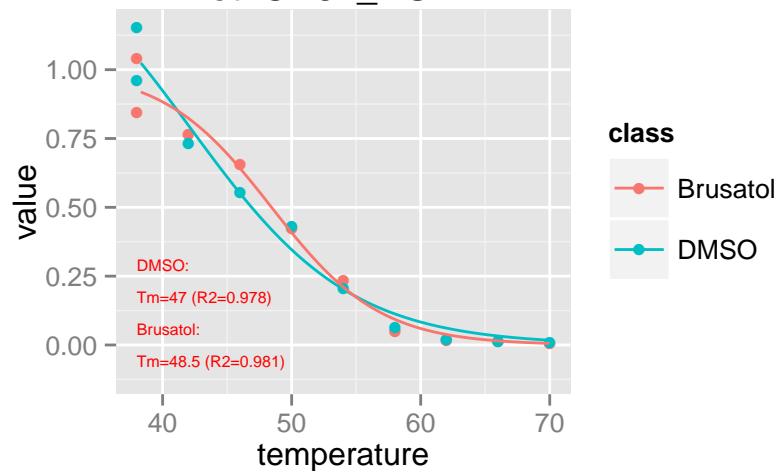

Prot: CNBP\_HUMAN

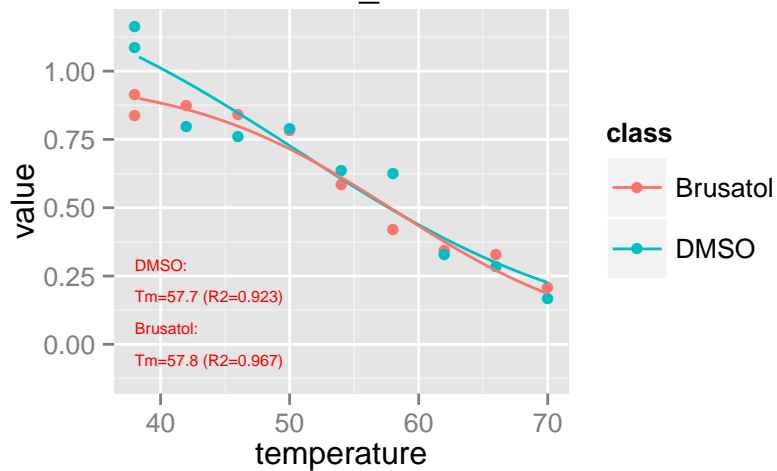

Prot: CND1\_HUMAN

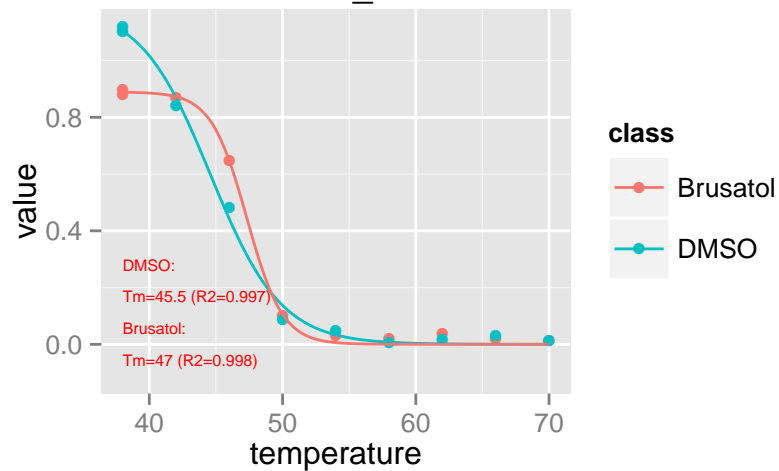

Prot: CND2\_HUMAN

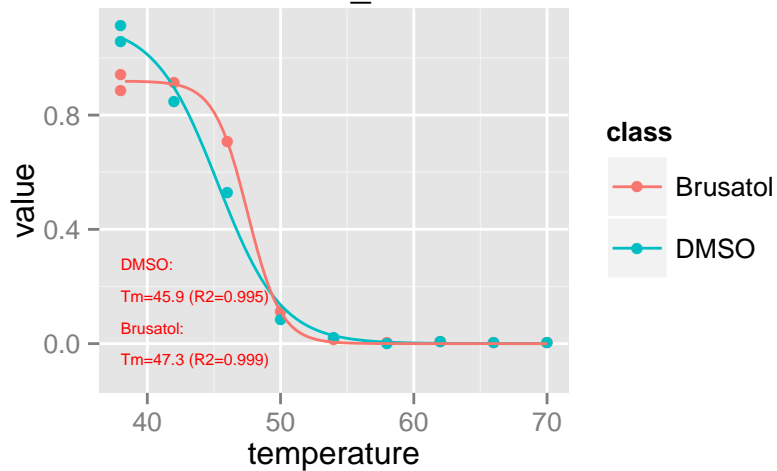

Prot: CND3\_HUMAN

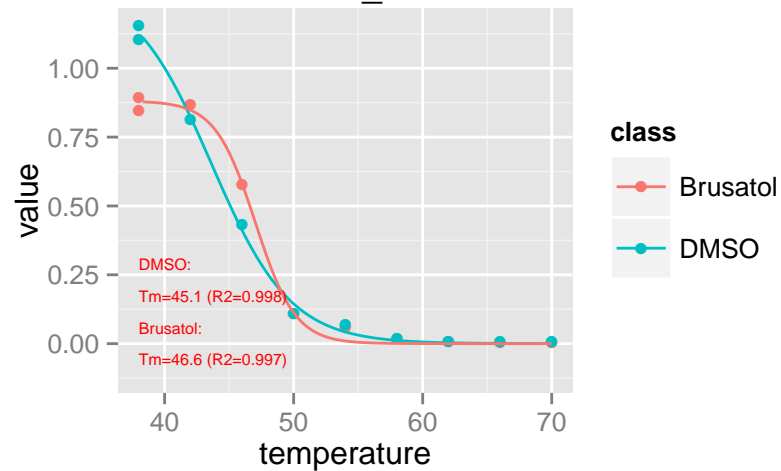

Prot: CNDP2\_HUMAN

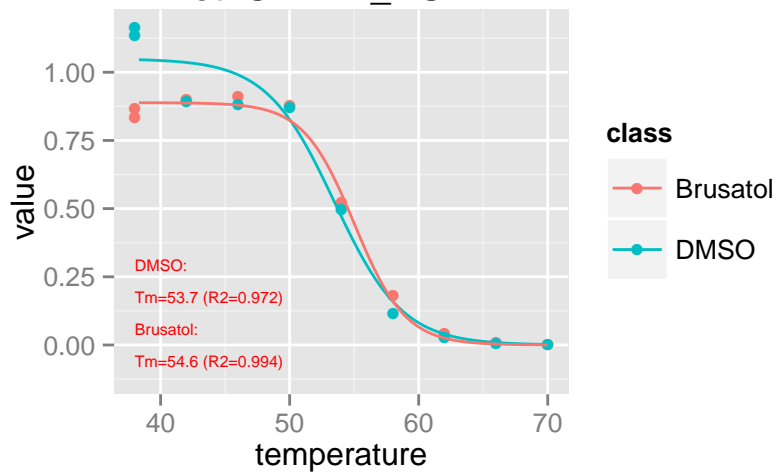

Prot: CNN2\_HUMAN

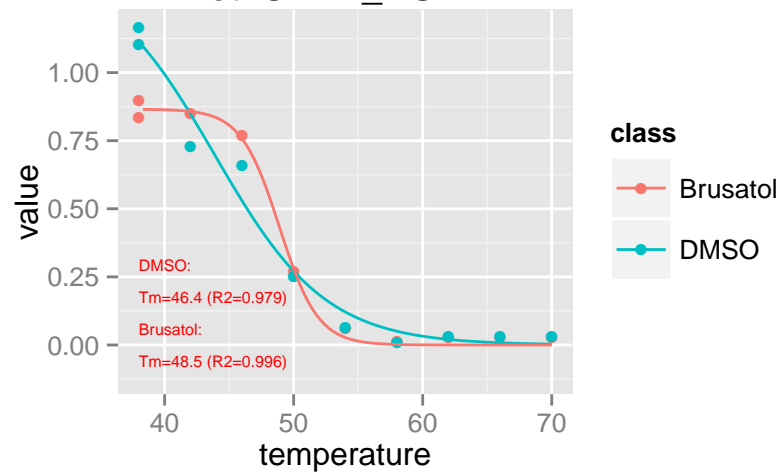

Prot: CNN3\_HUMAN

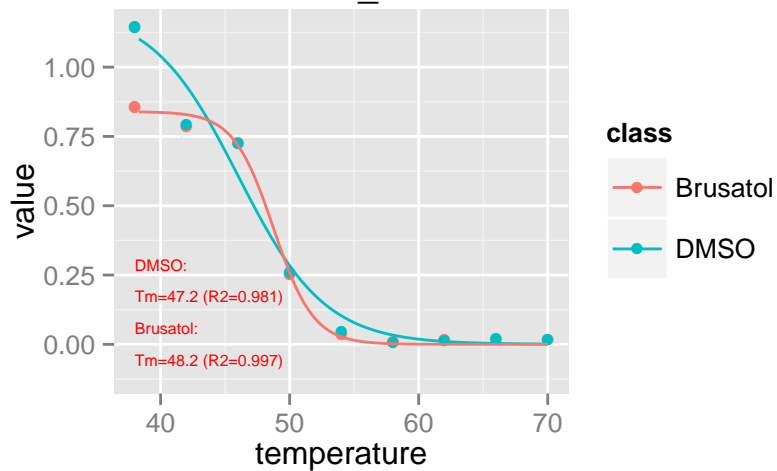

Prot: CNOT1\_HUMAN

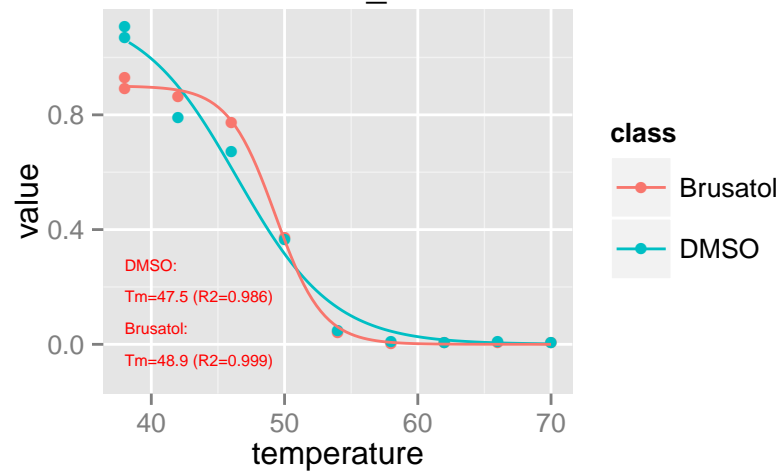

Prot: CNOT2\_HUMAN

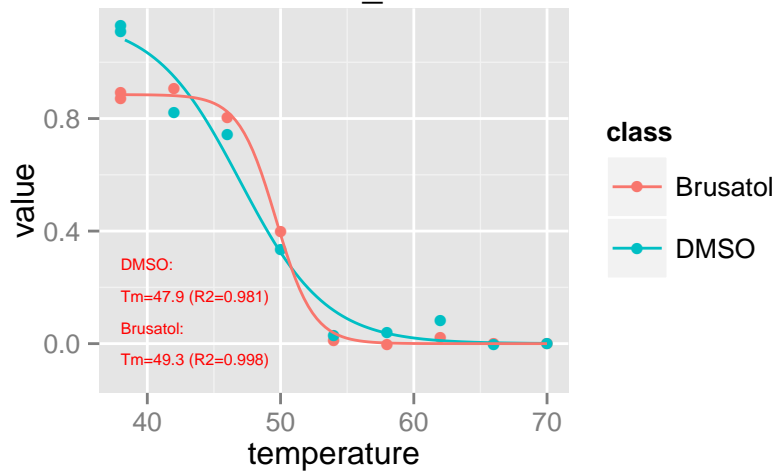

Prot: CNOT3\_HUMAN

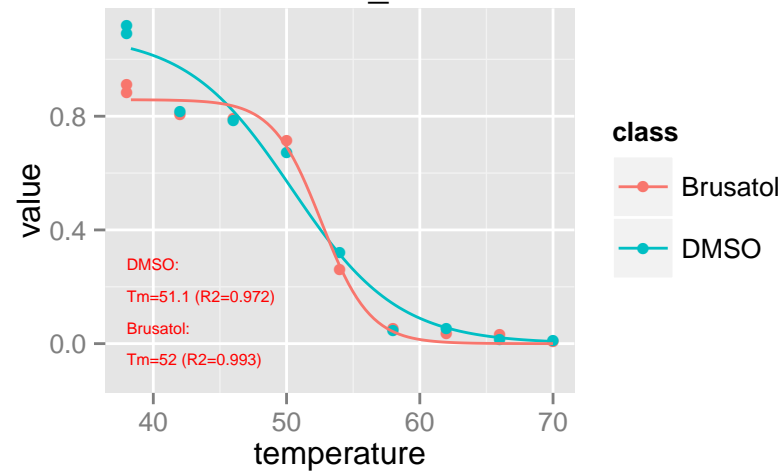

Prot: CNOT4\_HUMAN

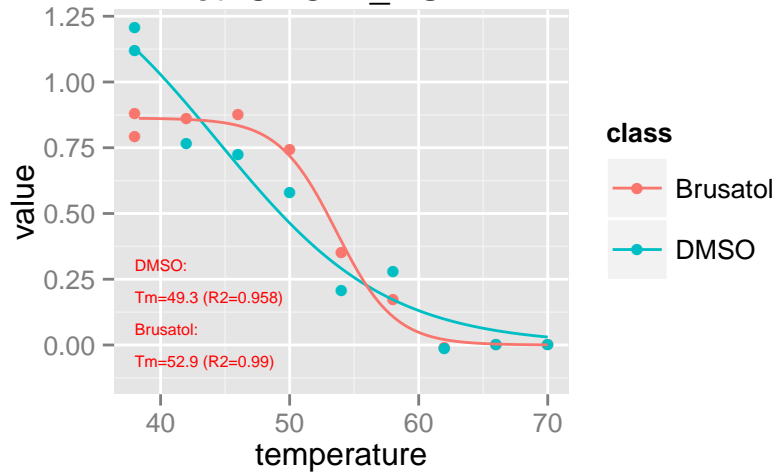

Prot: CNOT7\_HUMAN

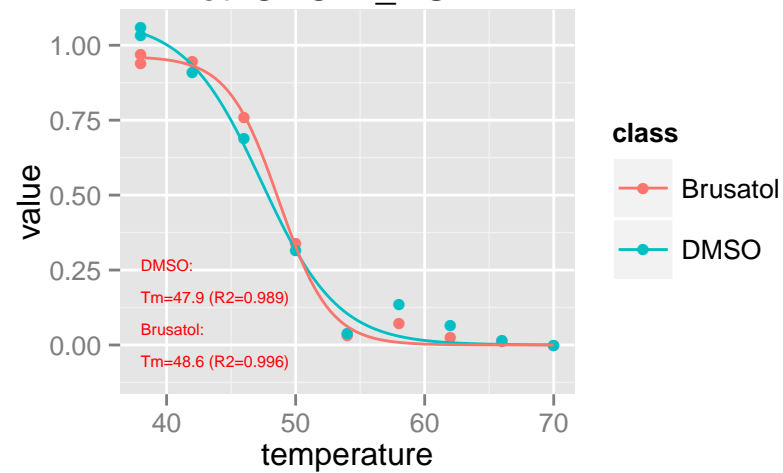

Prot: CNOTA\_HUMAN

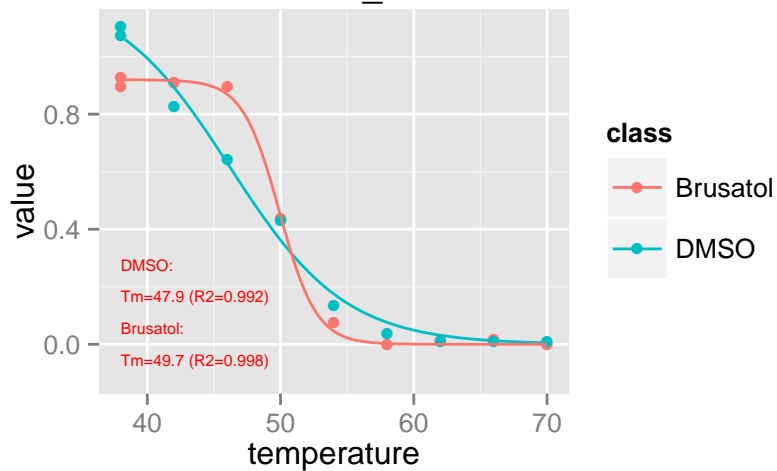

Prot: CNPY2\_HUMAN

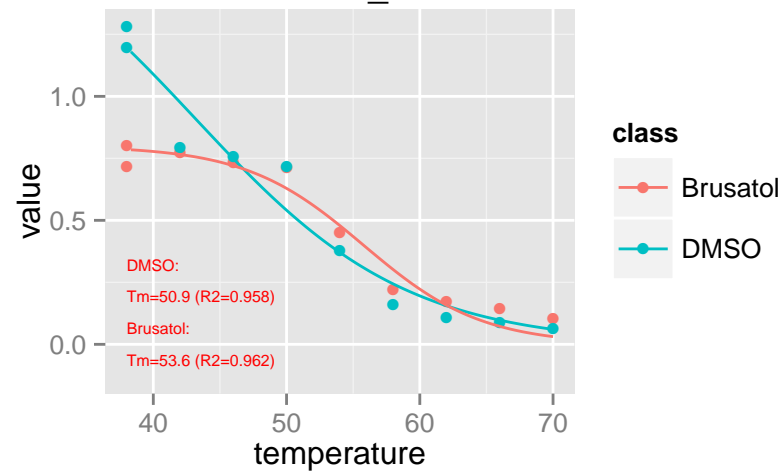

Prot: CNPY3\_HUMAN

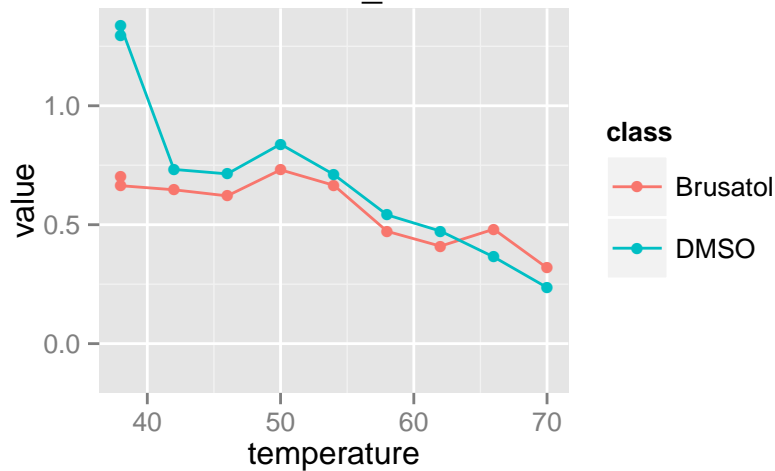

Prot: CNPY4\_HUMAN

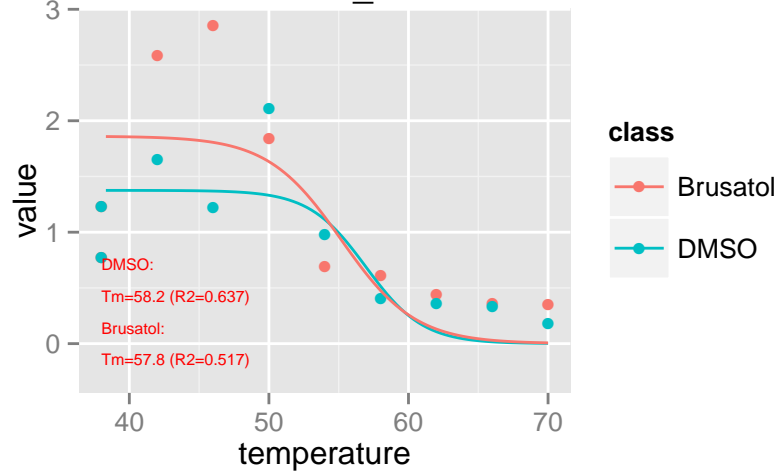

Prot: CO038\_HUMAN

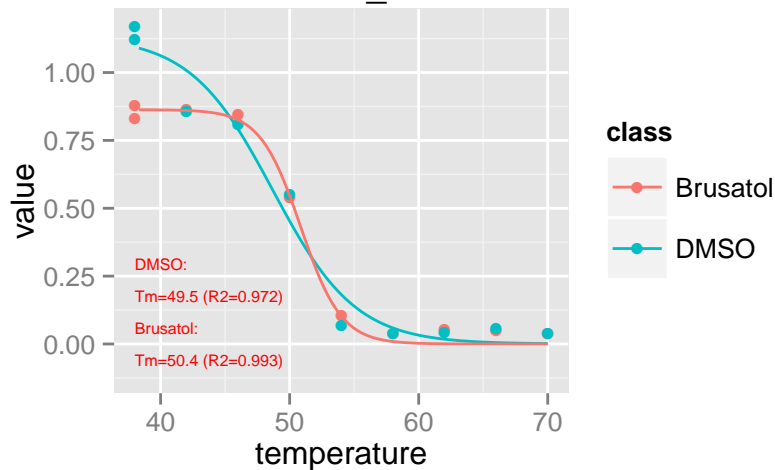

Prot: CO040\_HUMAN

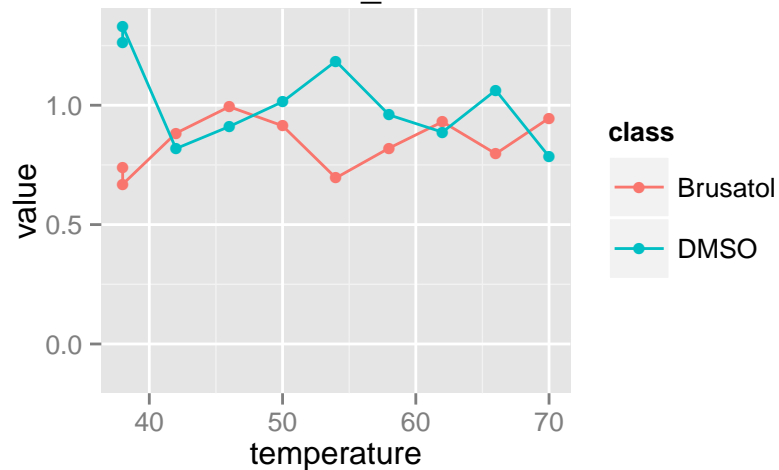

Prot: CO044\_HUMAN

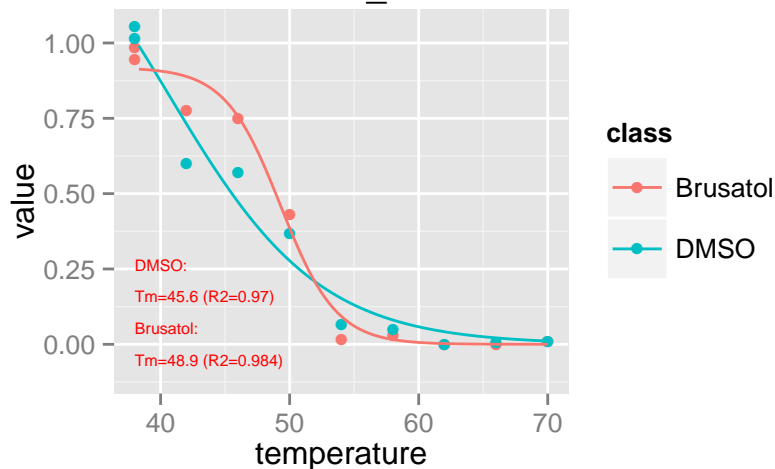

Prot: COAC\_HUMAN

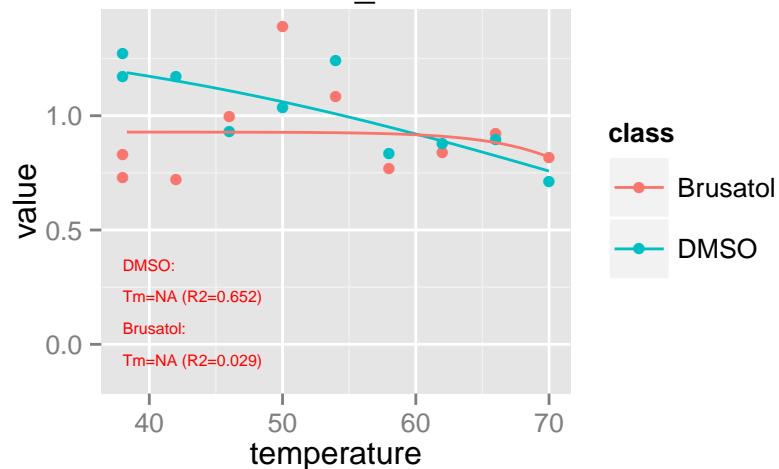

Prot: COASY\_HUMAN

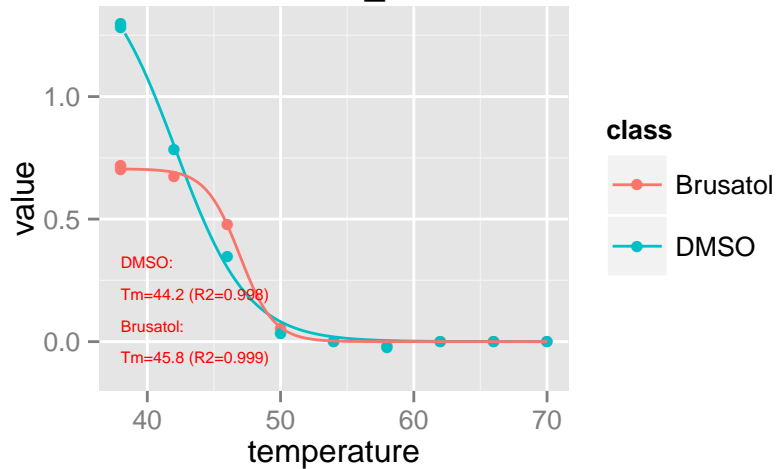

Prot: COF1\_HUMAN

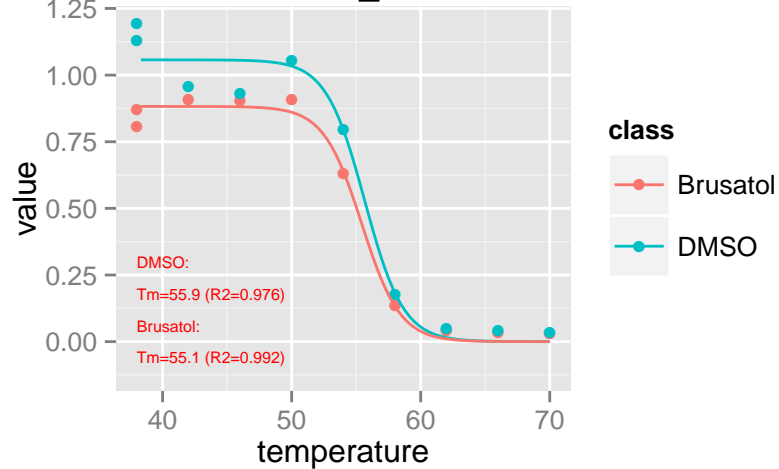

Prot: COF2\_HUMAN

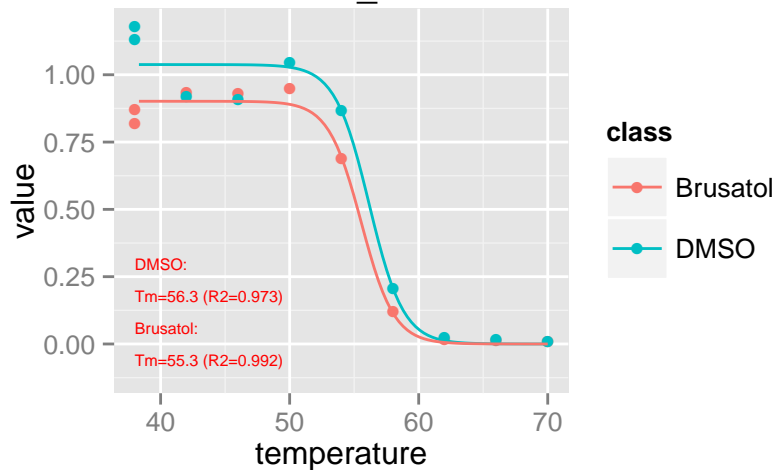

Prot: COG1\_HUMAN

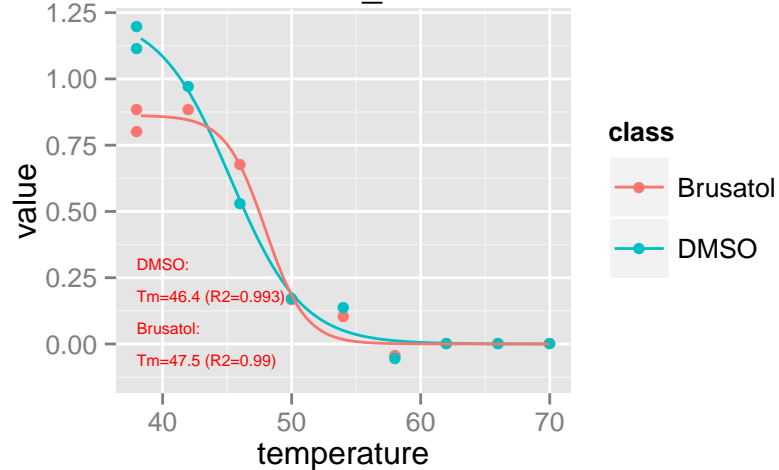

Prot: COG4\_HUMAN

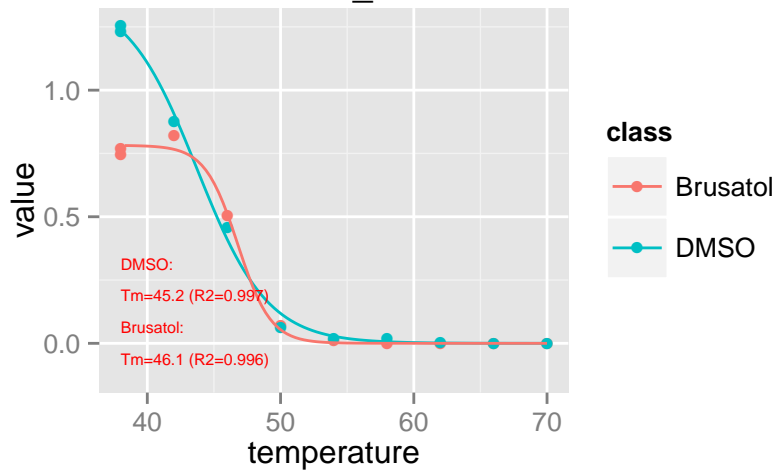

Prot: COG5\_HUMAN

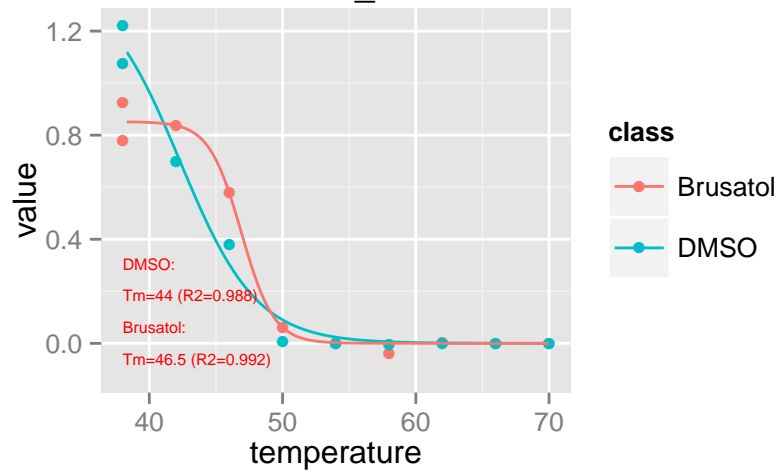

Prot: COG6\_HUMAN

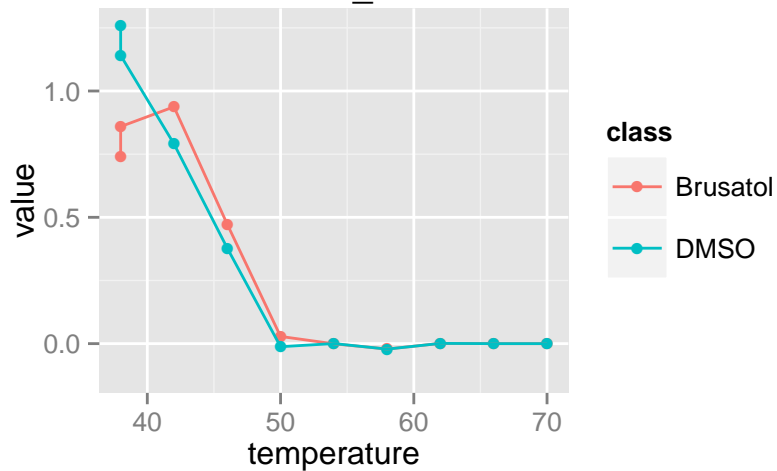

Prot: COG7\_HUMAN

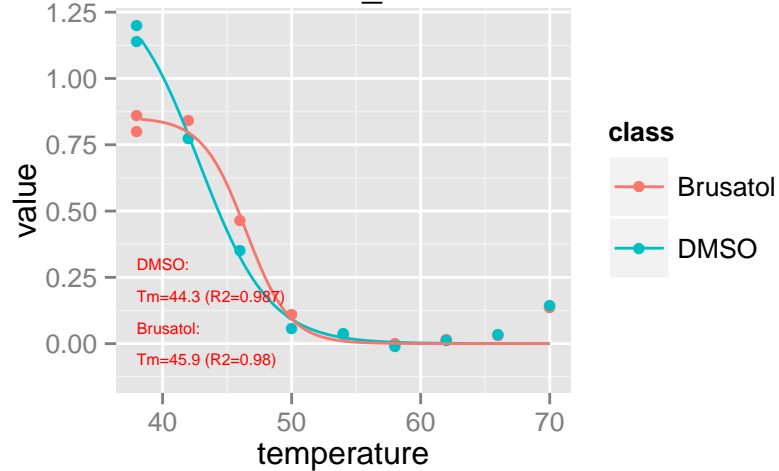

Prot: COG8\_HUMAN

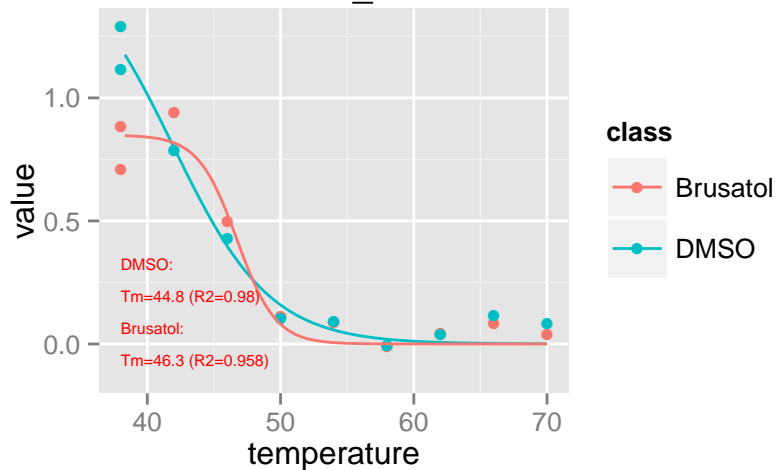

Prot: COIL\_HUMAN

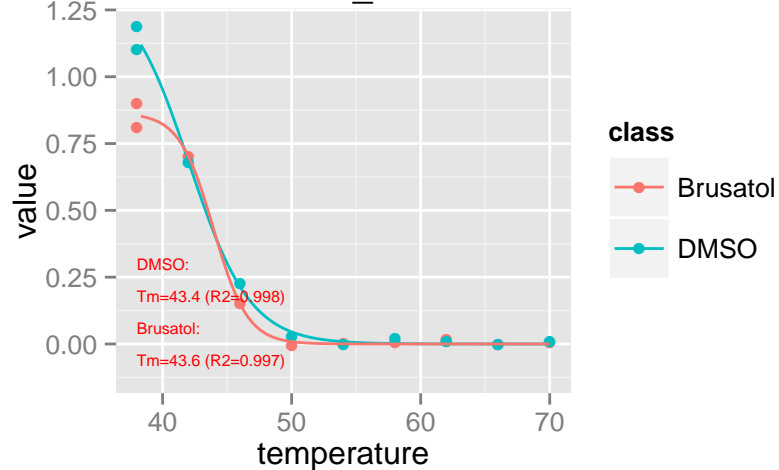

Prot: COMD1\_HUMAN

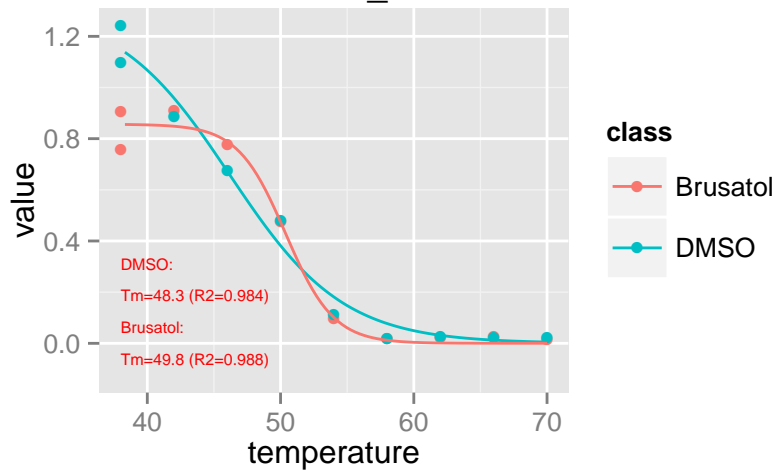

Prot: COMD2\_HUMAN

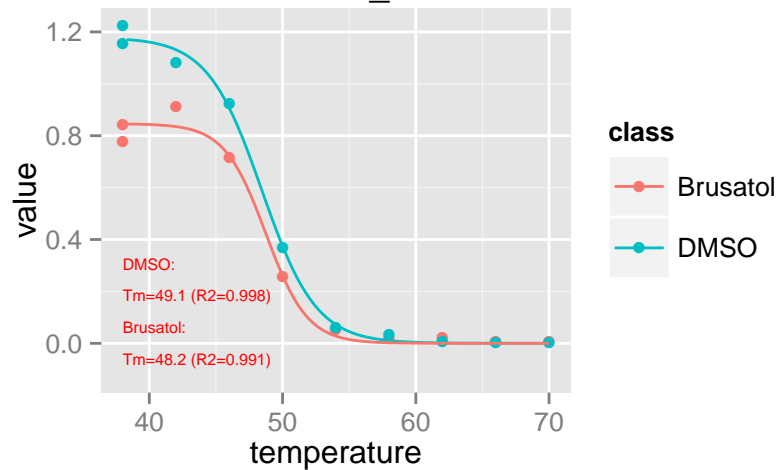

Prot: COMD3\_HUMAN

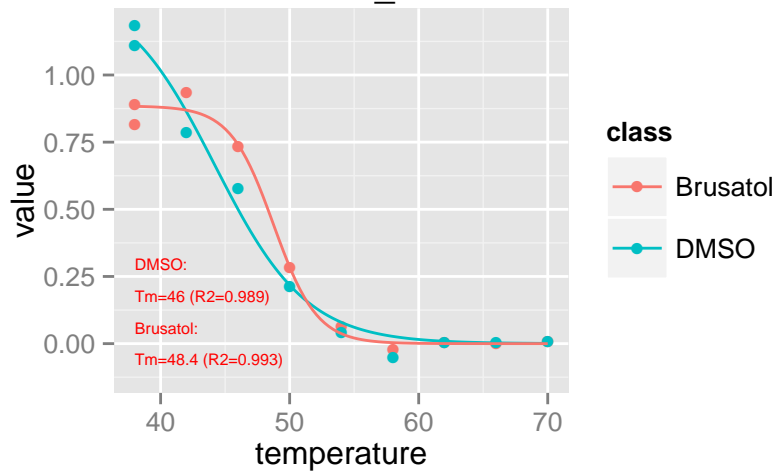

Prot: COMD4\_HUMAN

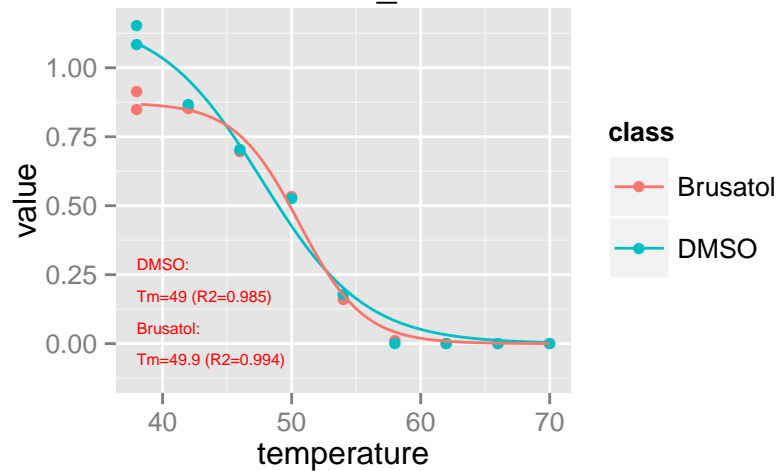

Prot: COMD6\_HUMAN

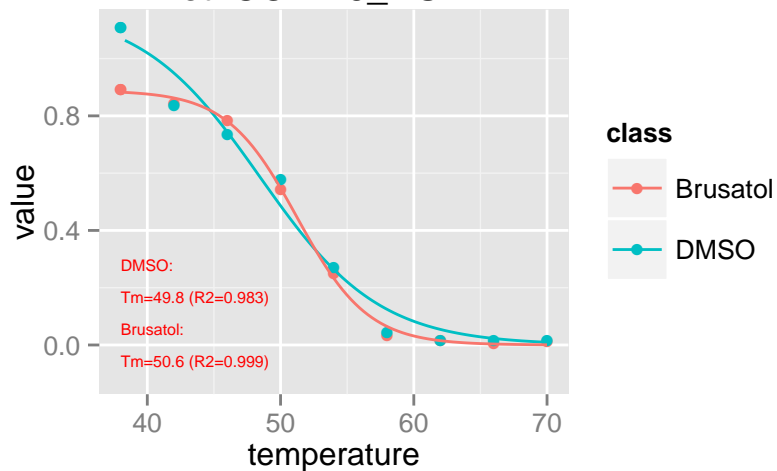

Prot: COMD7\_HUMAN

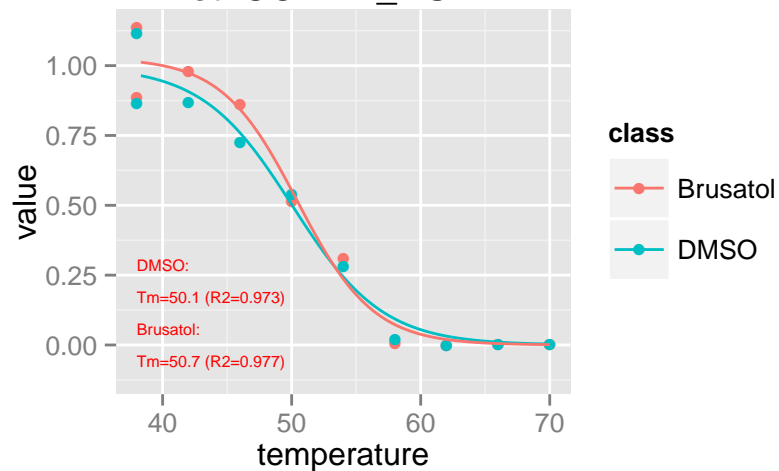

Prot: COMD8\_HUMAN

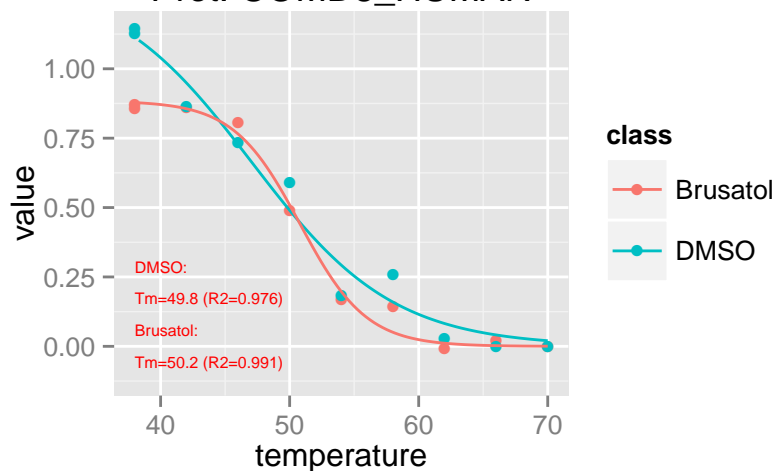

Prot: COMD9\_HUMAN

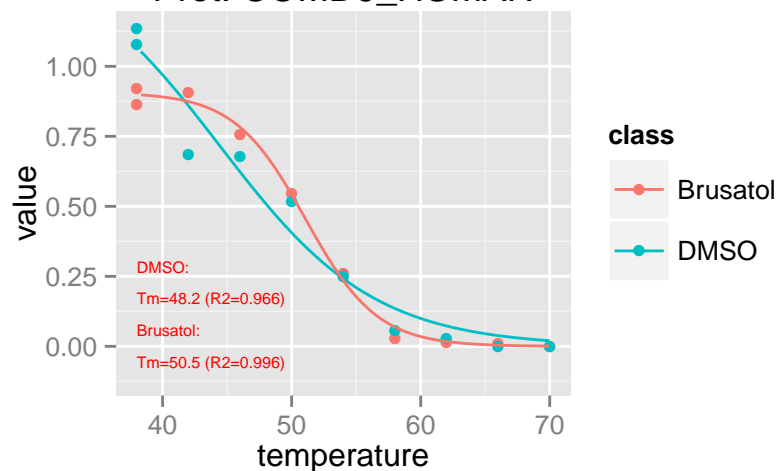

Prot: COMDA\_HUMAN

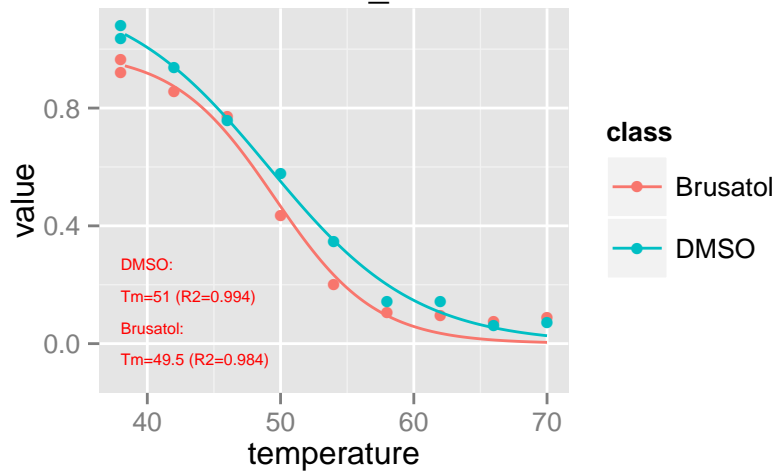

Prot: COMT\_HUMAN

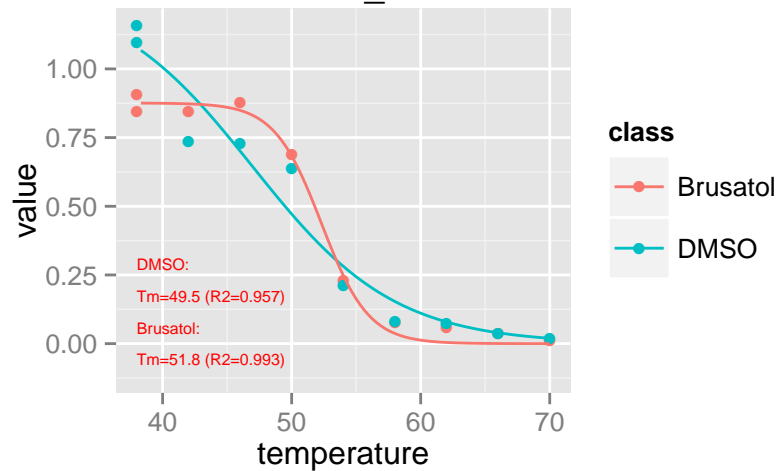

Prot: COPA\_HUMAN

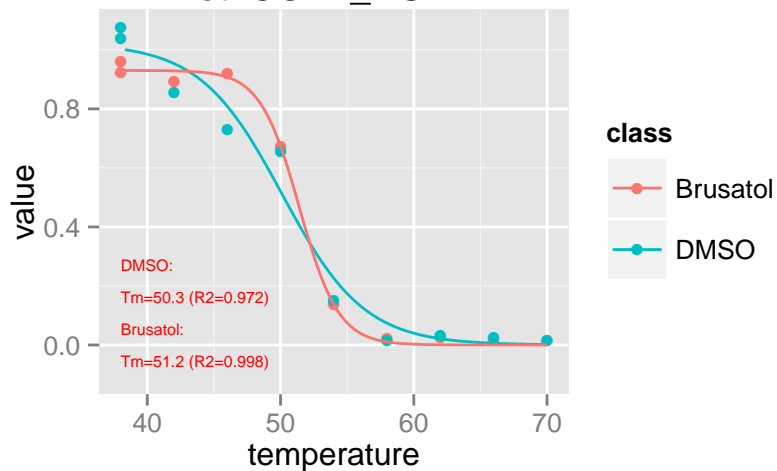

Prot: COPB\_HUMAN

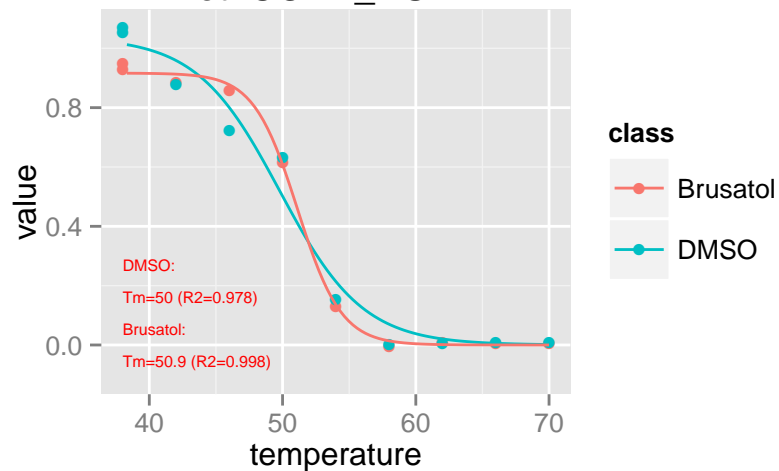

Prot: COPB2\_HUMAN

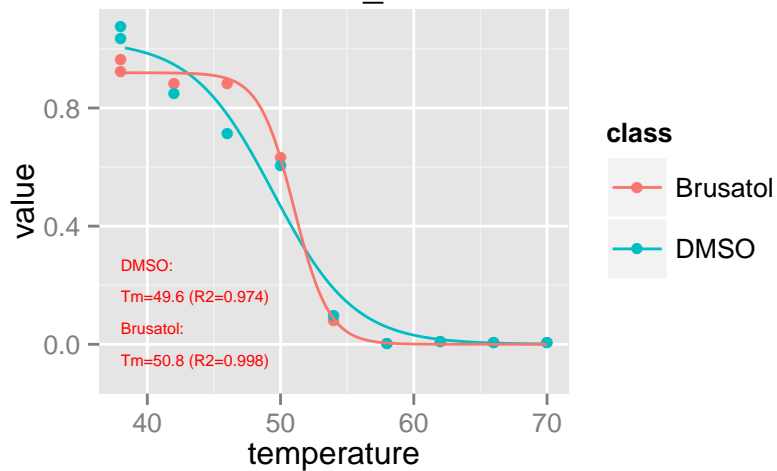

Prot: COPD\_HUMAN

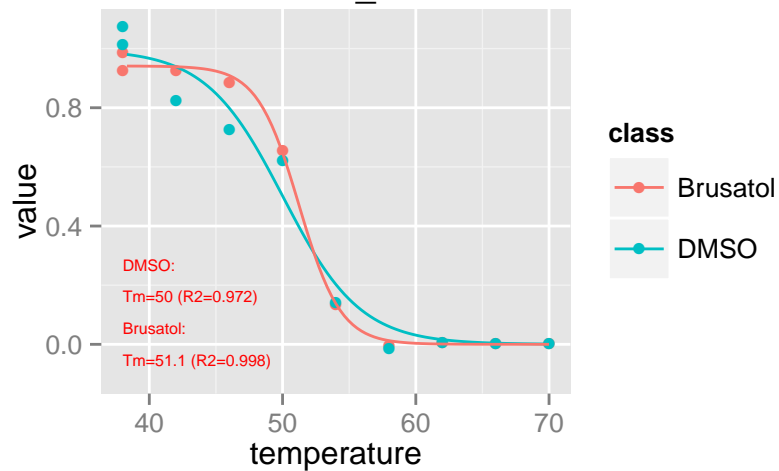



Prot: COPE\_HUMAN

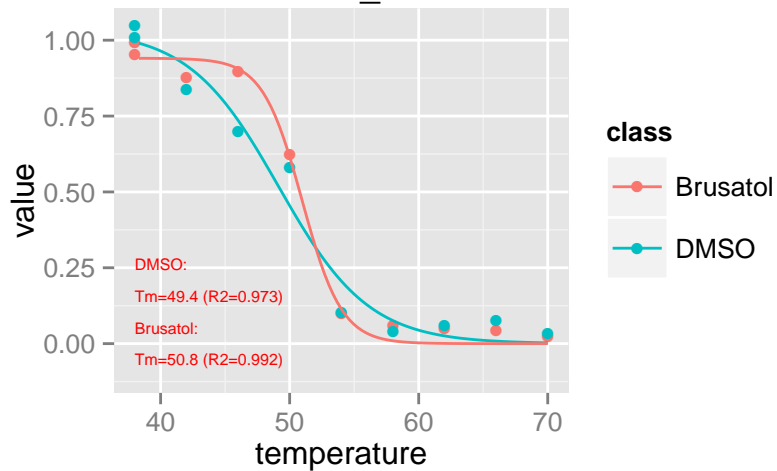

Prot: COPG\_HUMAN

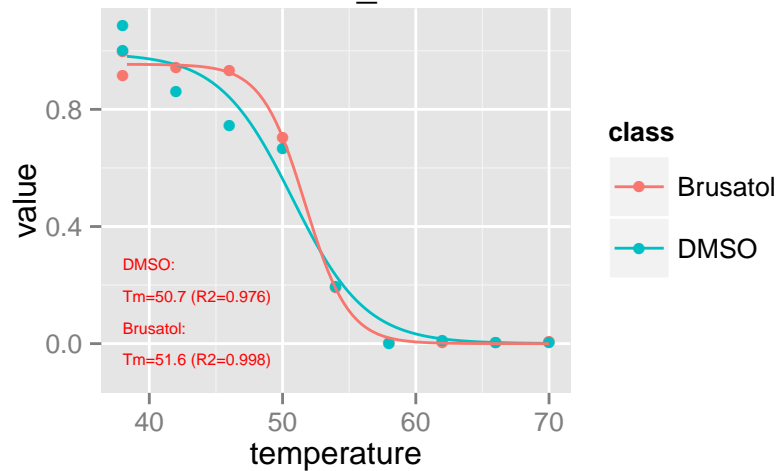

Prot: COPG2\_HUMAN

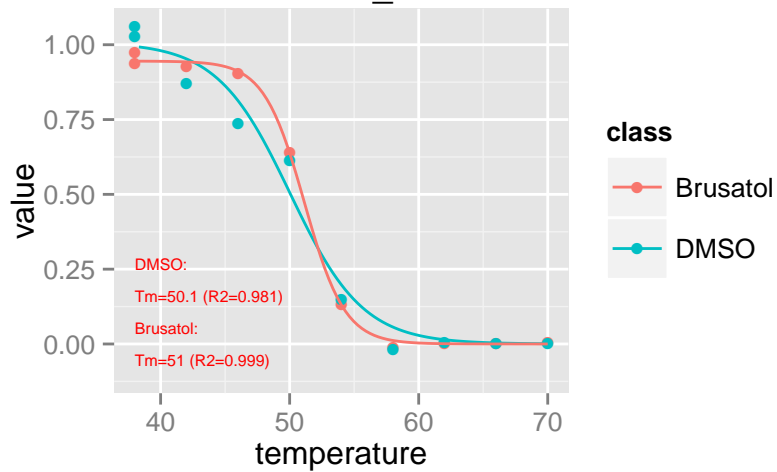

Prot: COPR5\_HUMAN

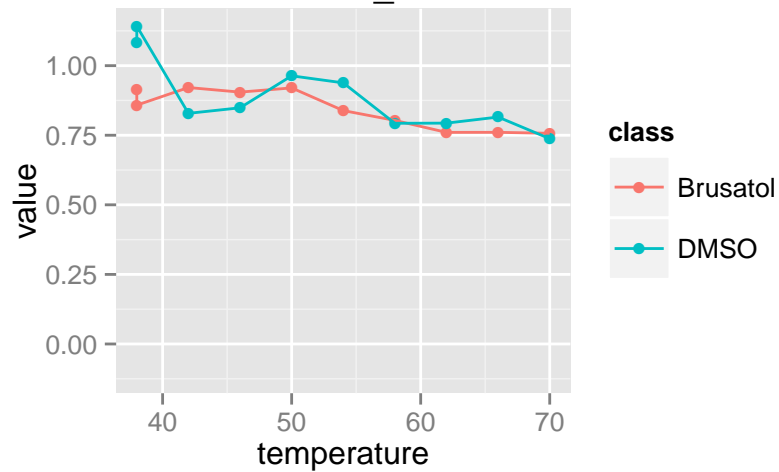

Prot: COPZ1\_HUMAN

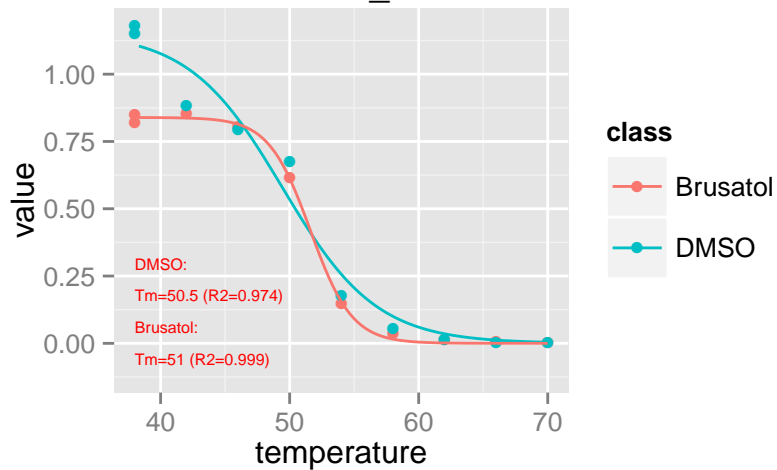

Prot: COQ9\_HUMAN

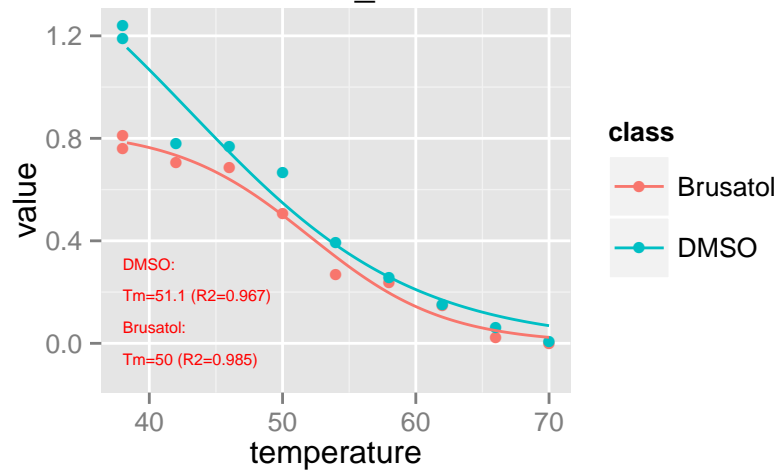

Prot: COR1B\_HUMAN

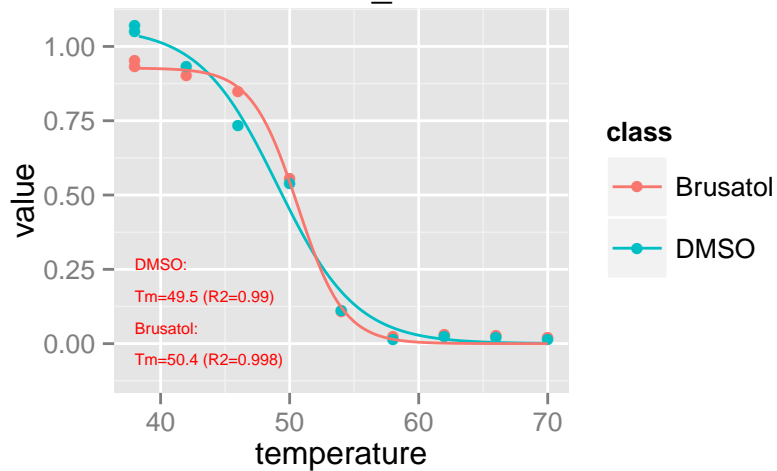

Prot: COR1C\_HUMAN

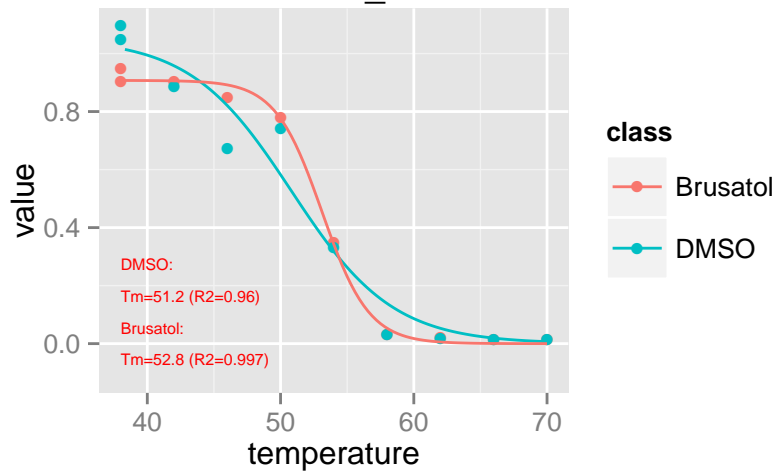

Prot: CORO7\_HUMAN

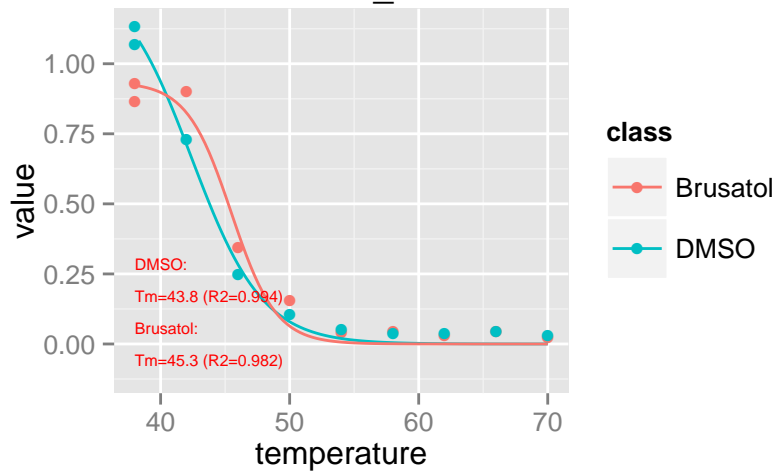

Prot: COTL1\_HUMAN

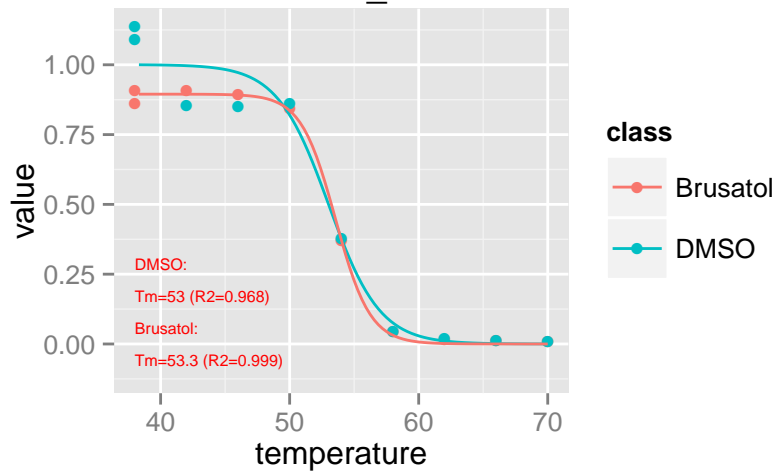

Prot: COX17\_HUMAN

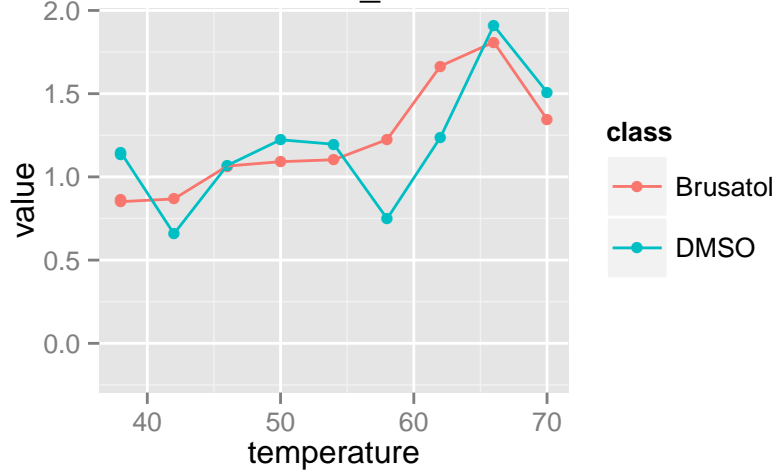

Prot: COX5A\_HUMAN

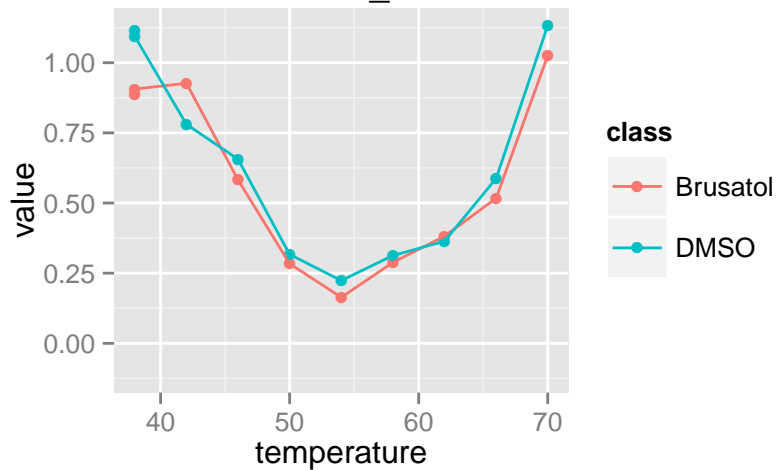

Prot: CP062\_HUMAN

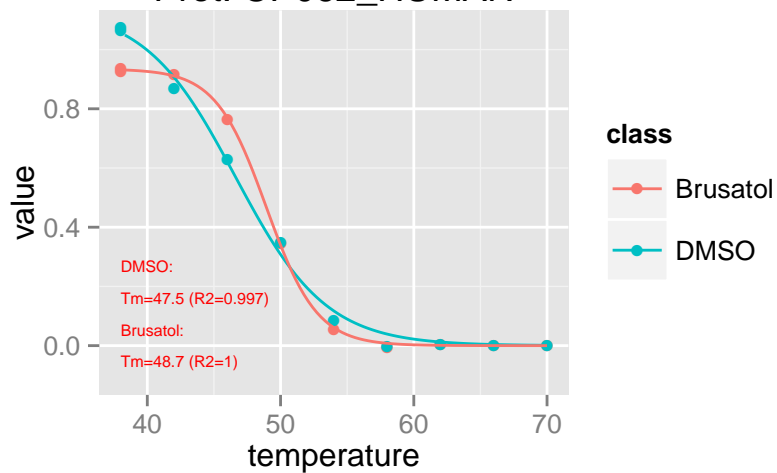

Prot: CP080\_HUMAN

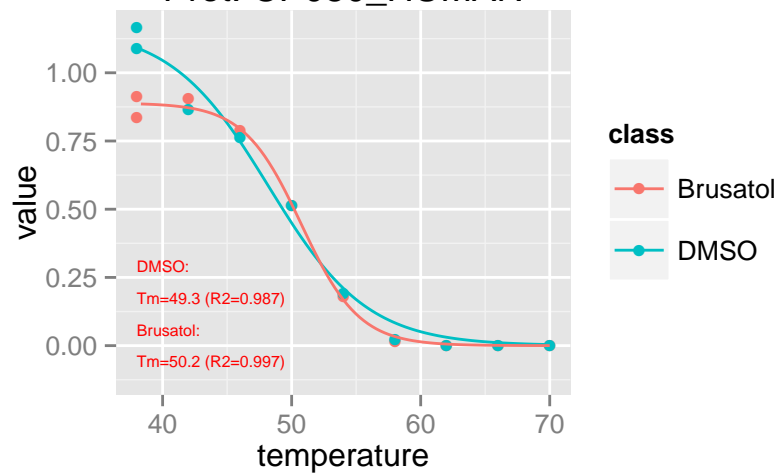

Prot: CP24A\_HUMAN

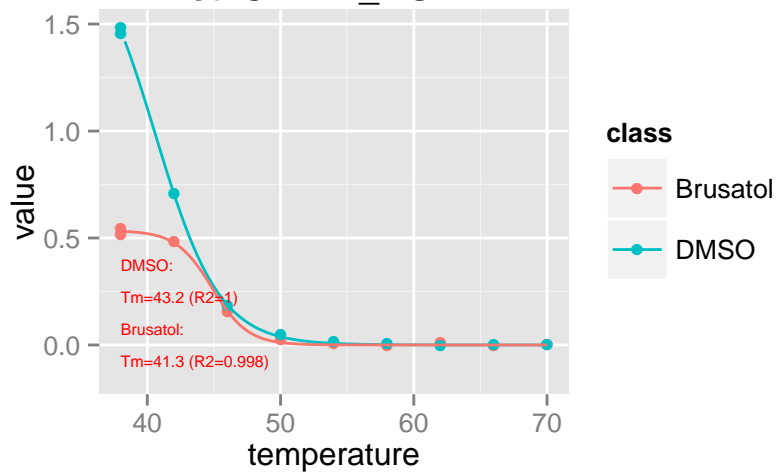

Prot: CPIN1\_HUMAN

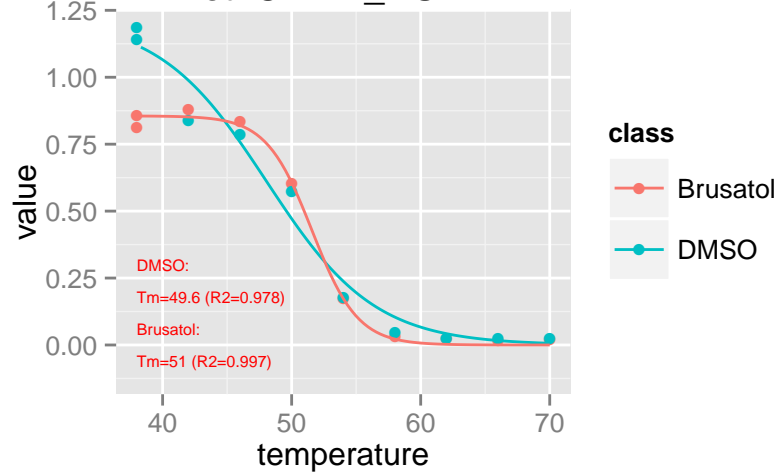

Prot: CPLX2\_HUMAN

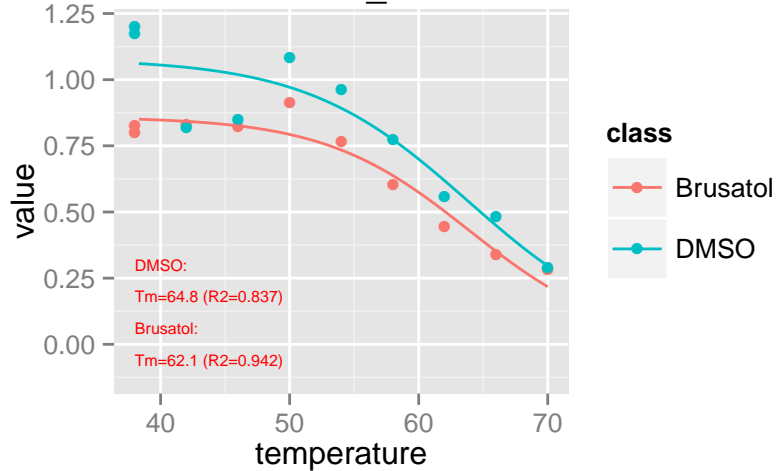

Prot: CPNE1\_HUMAN

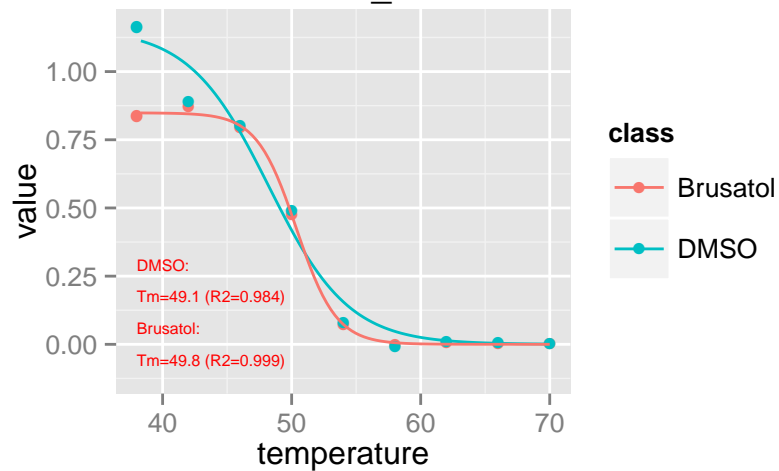

Prot: CPNE2\_HUMAN

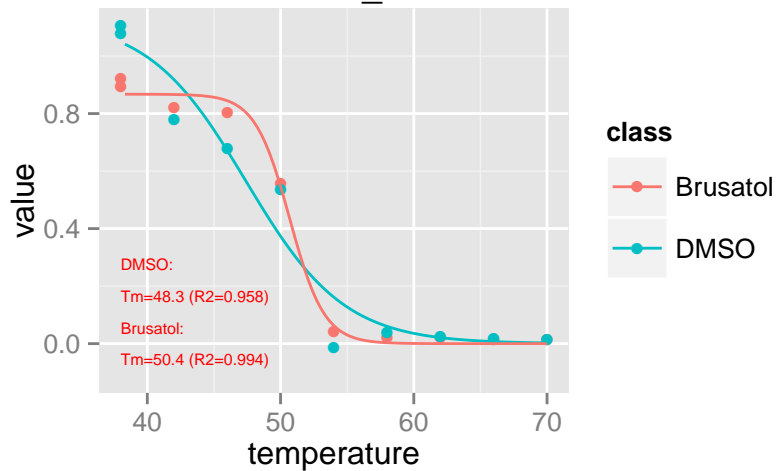

Prot: CPNE3\_HUMAN

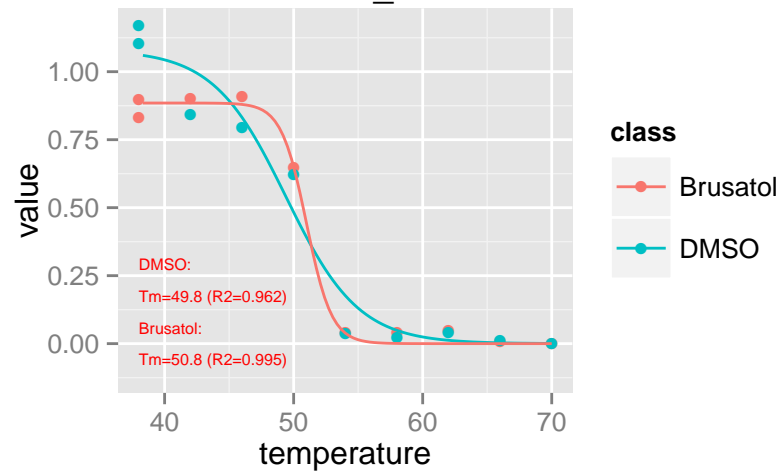

Prot: CPNS1\_HUMAN

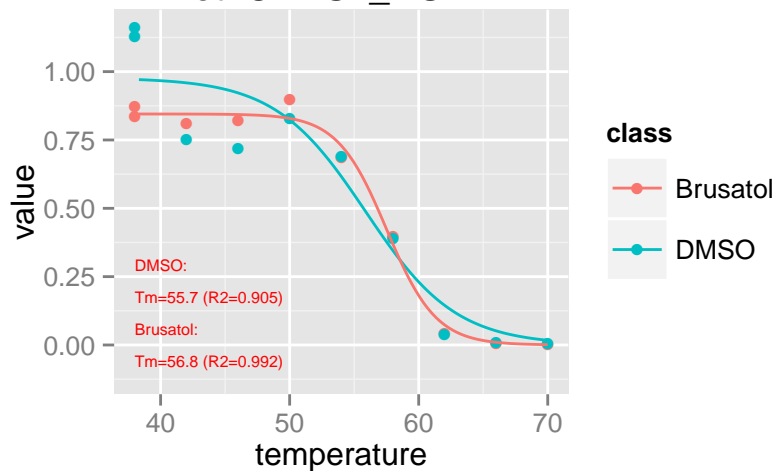

Prot: CPPED\_HUMAN

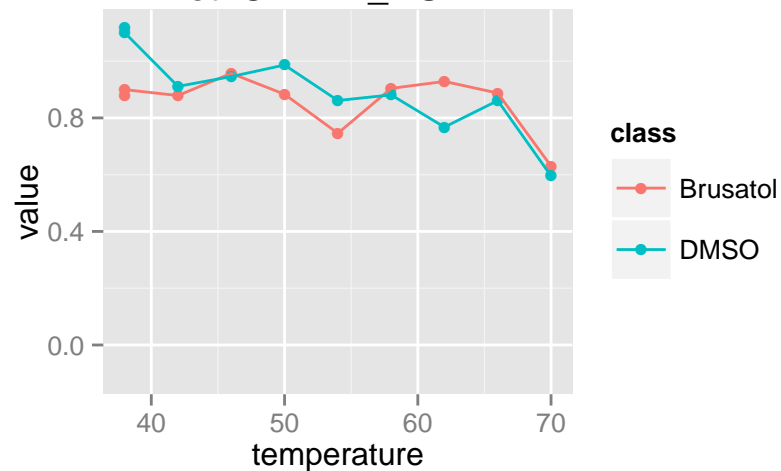

Prot: CPSF1\_HUMAN

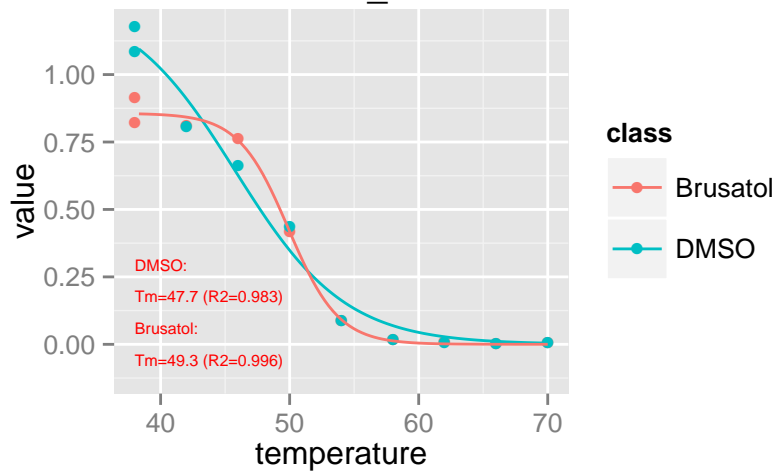

Prot: CPSF2\_HUMAN

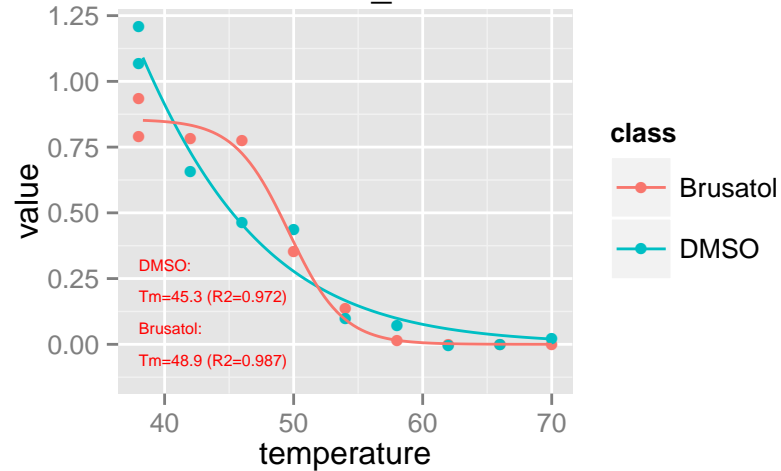

Prot: CPSF3\_HUMAN

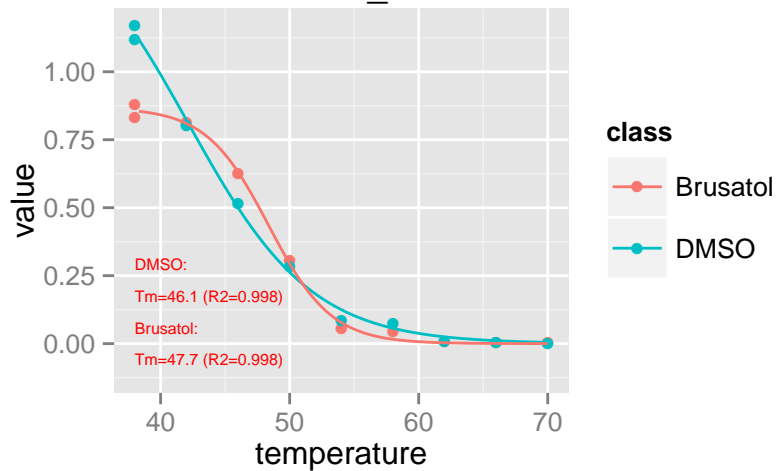

Prot: CPSF5\_HUMAN

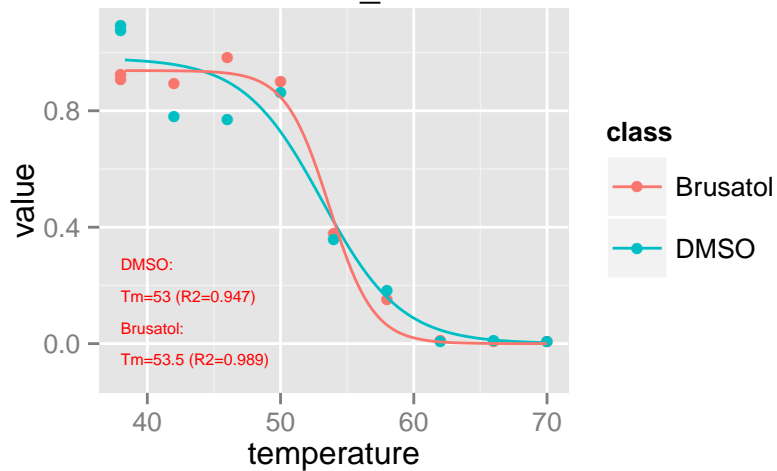

Prot: CPSF6\_HUMAN

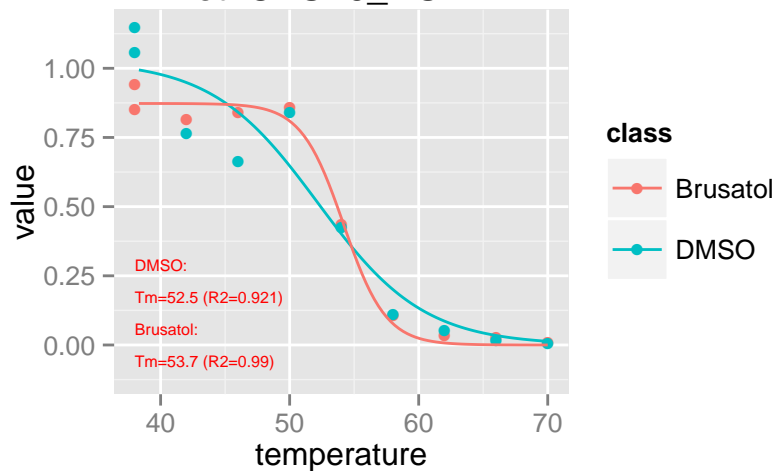

Prot: CPSF7\_HUMAN

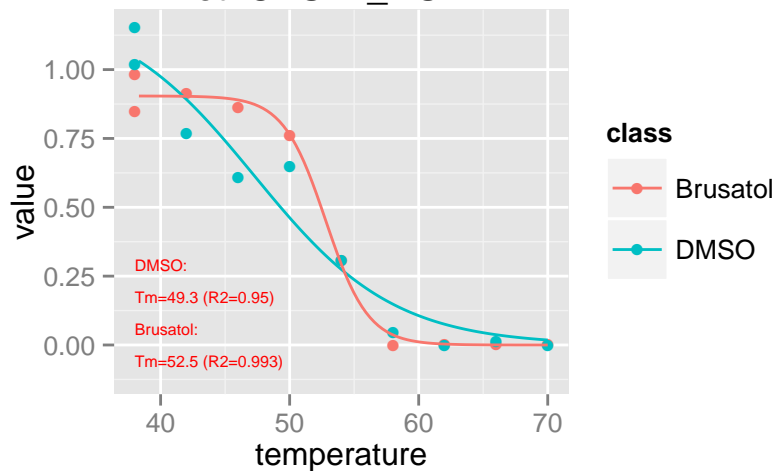

Prot: CPSM\_HUMAN

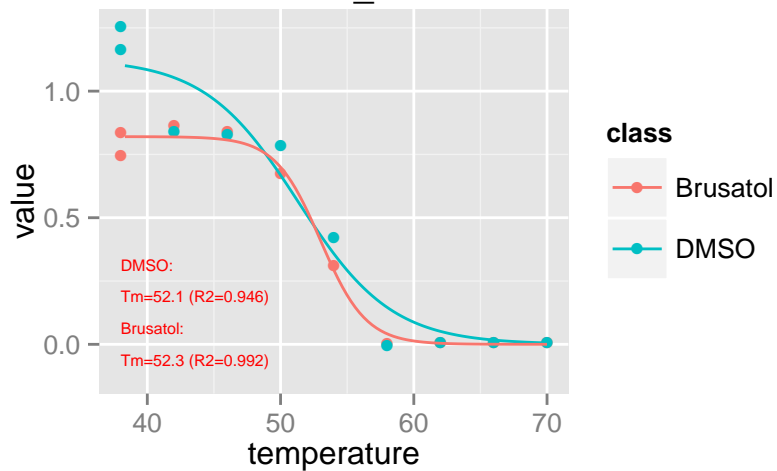

Prot: CPT2\_HUMAN

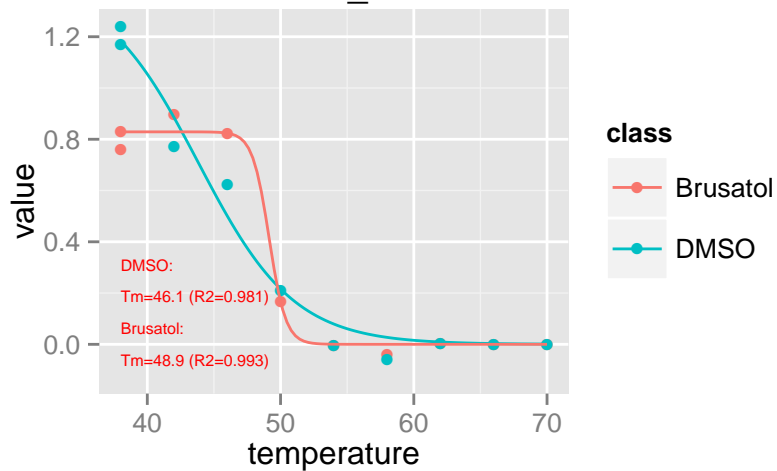

Prot: CQ059\_HUMAN

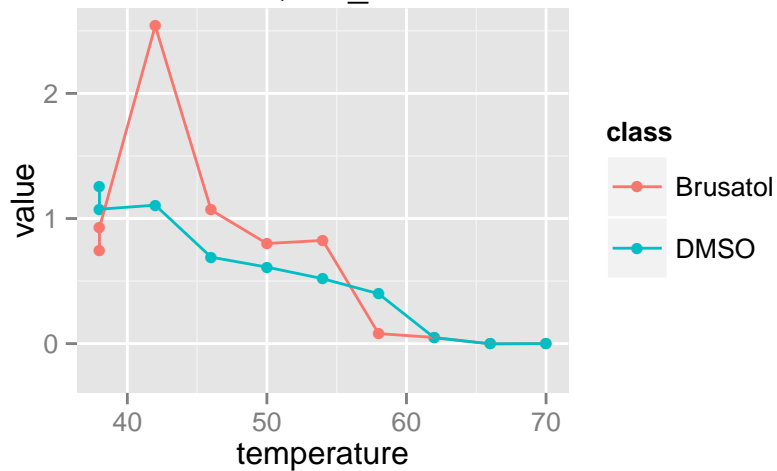

Prot: CQ085\_HUMAN

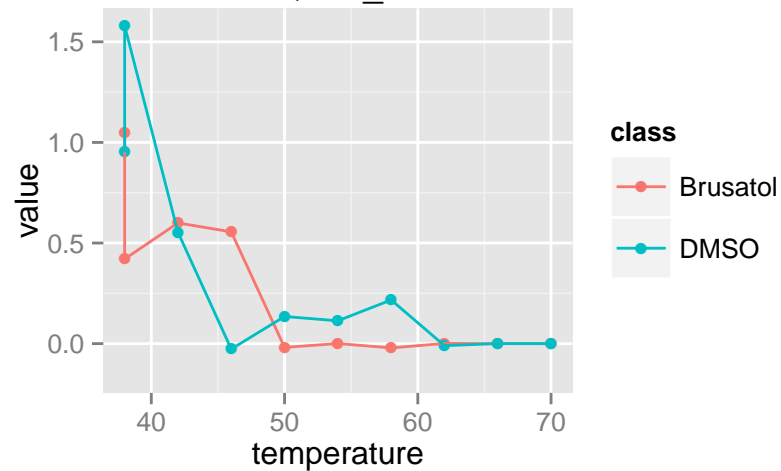

Prot: CQ089\_HUMAN

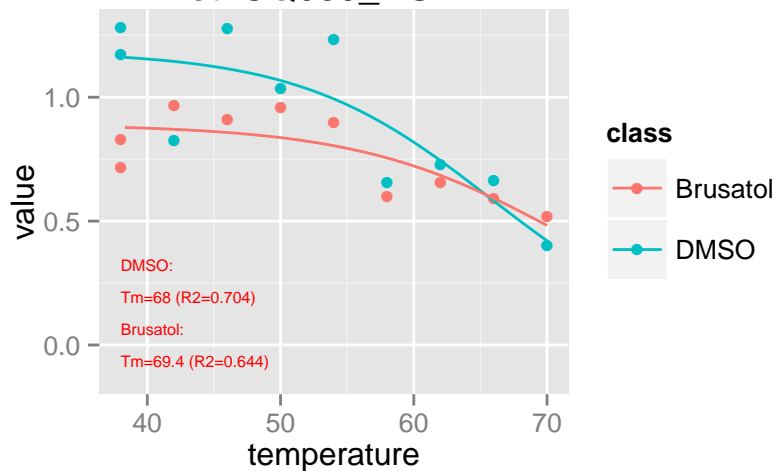

Prot: CREB1\_HUMAN

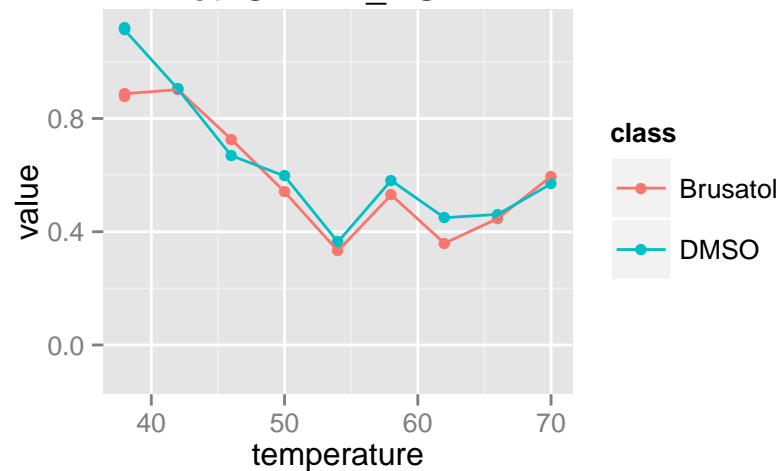

Prot: CREL2\_HUMAN

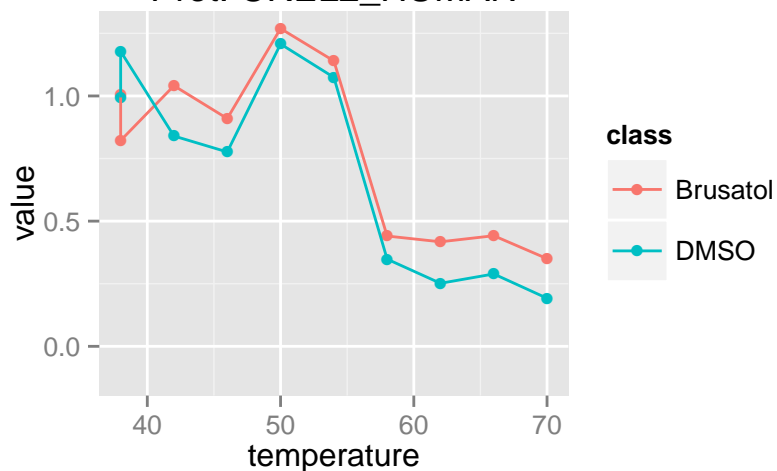

Prot: CRIP1\_HUMAN

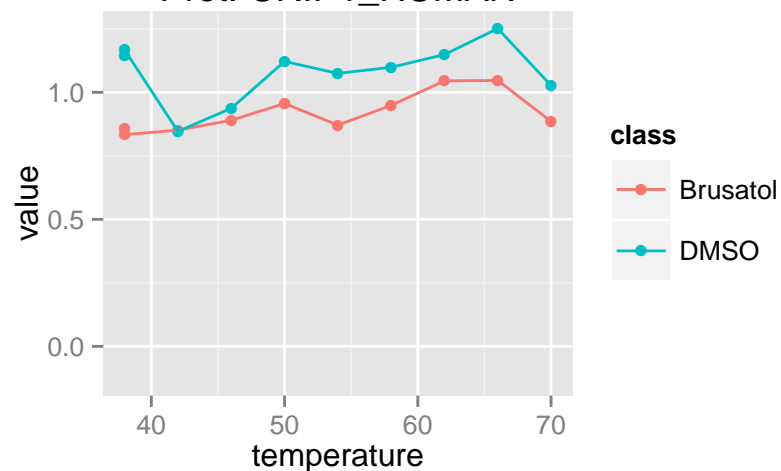

Prot: CRIP2\_HUMAN

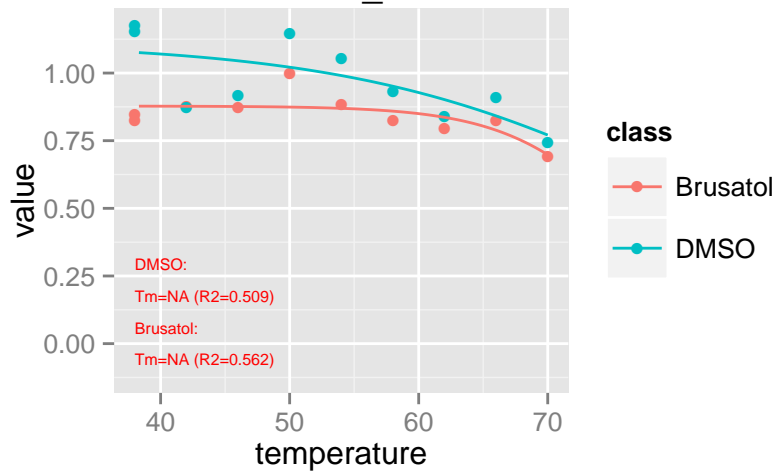

Prot: CRK\_HUMAN

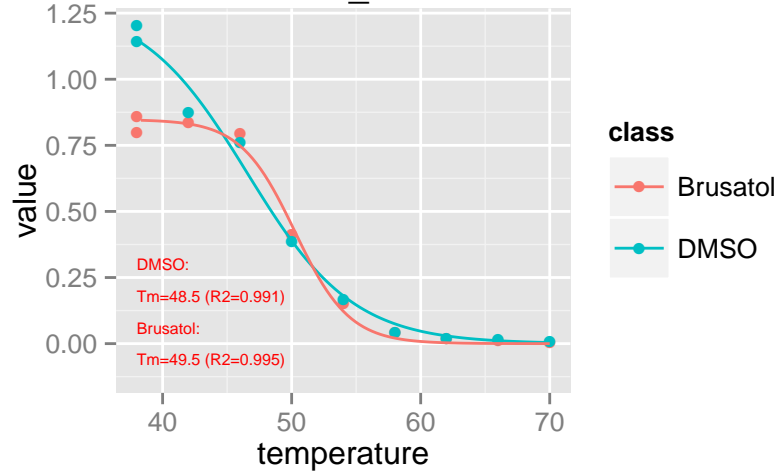

Prot: CRKL\_HUMAN

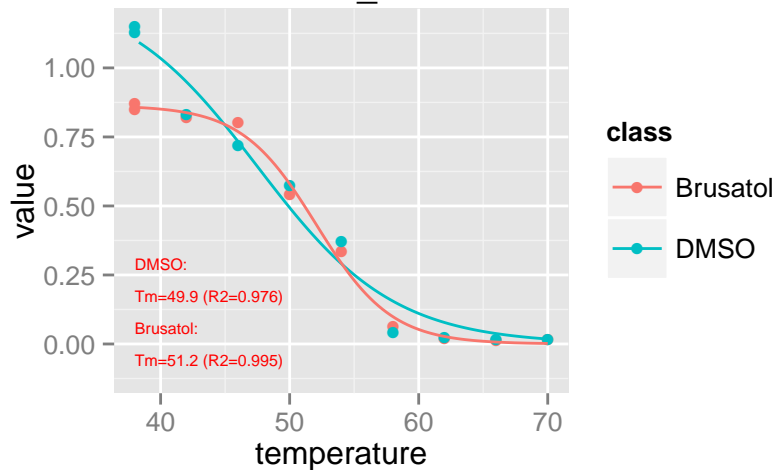

Prot: CRLF3\_HUMAN

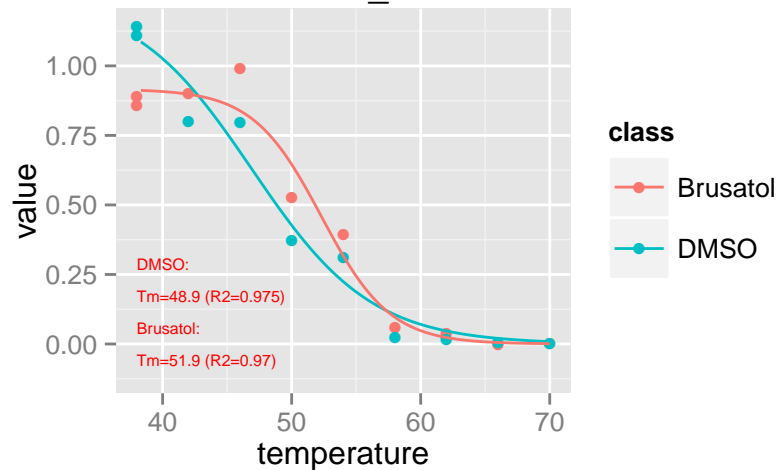

Prot: CRNL1\_HUMAN

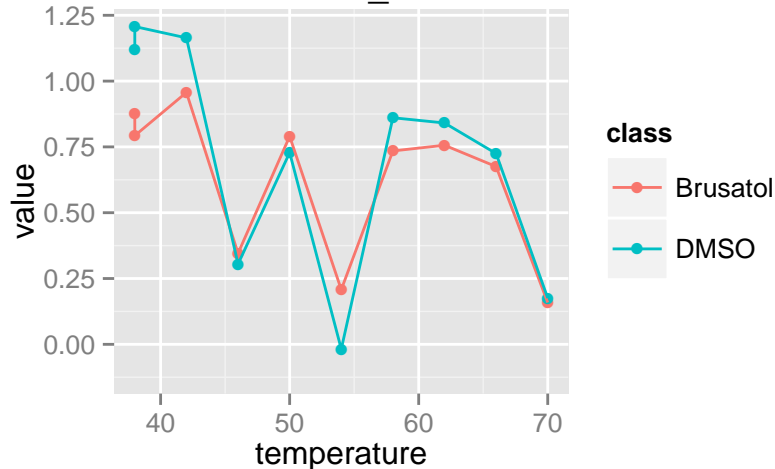

Prot: CRTAP\_HUMAN

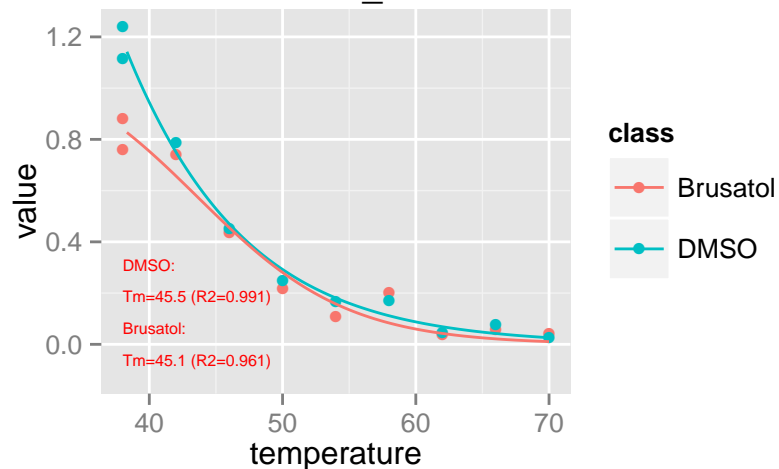

Prot: CRYM\_HUMAN

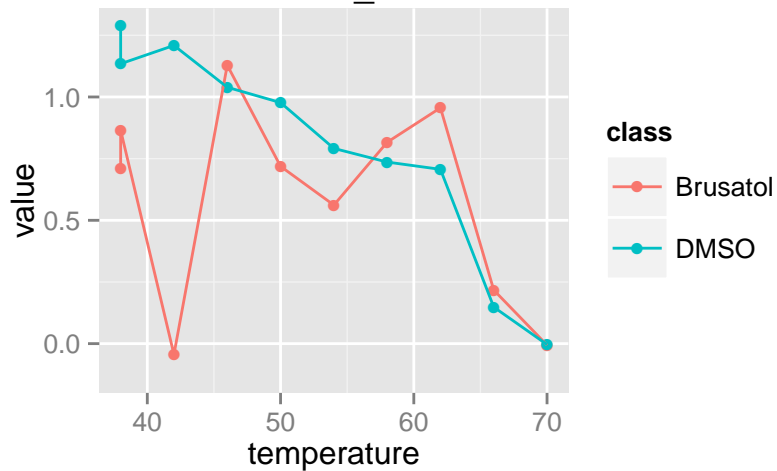

Prot: CS010\_HUMAN

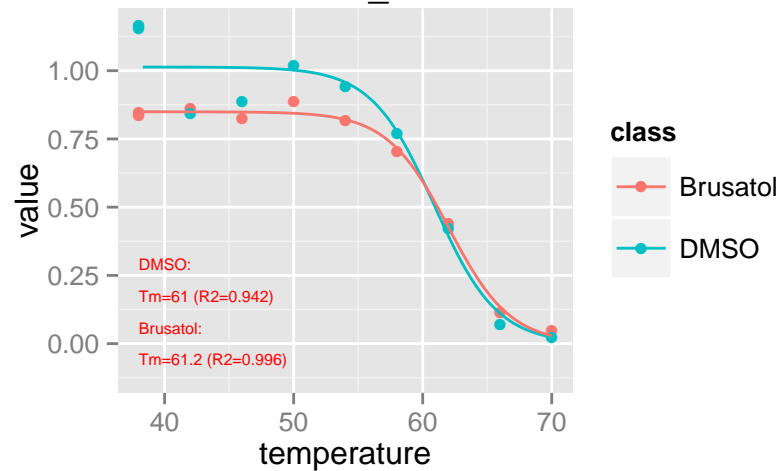

Prot: CS021\_HUMAN

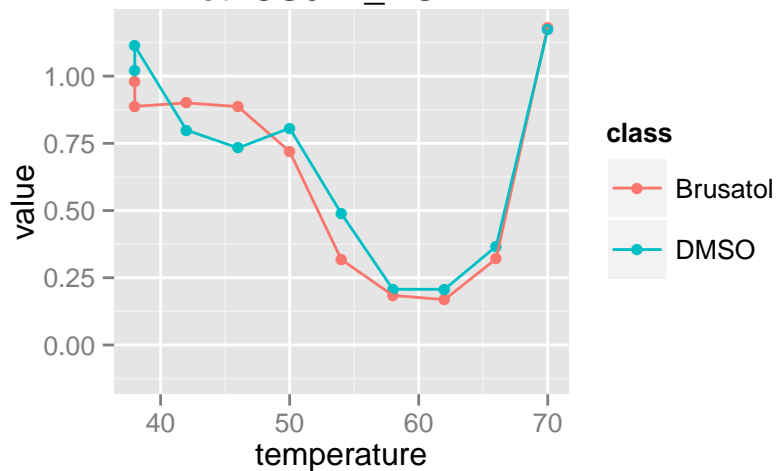

Prot: CS043\_HUMAN

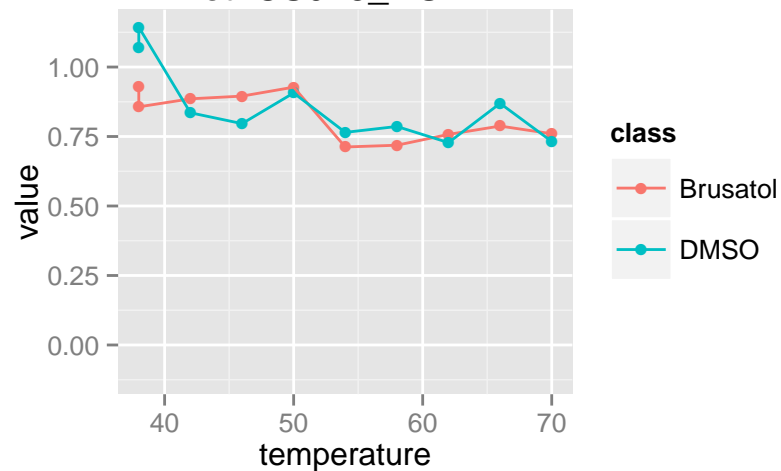

Prot: CSDE1\_HUMAN

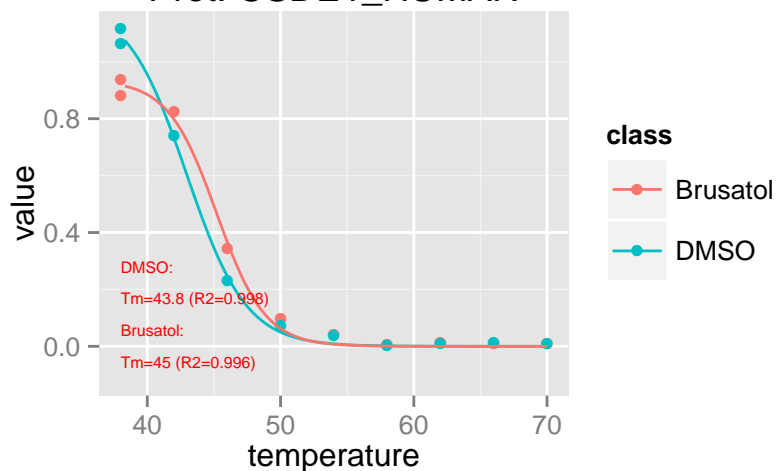

Prot: CSK\_HUMAN

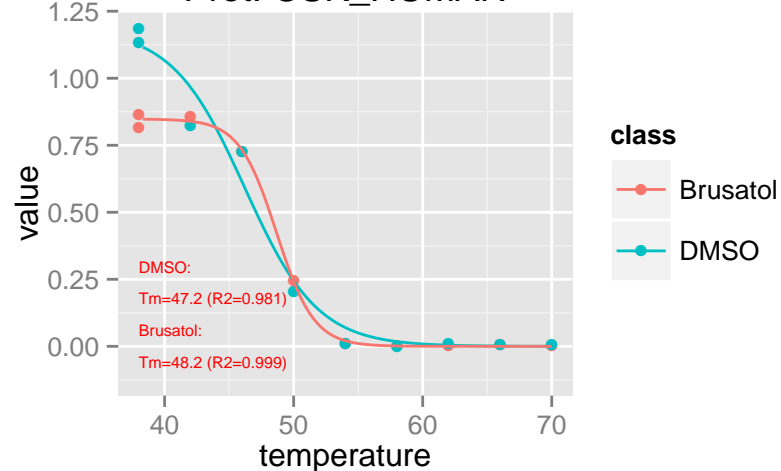



Prot: CSK21\_HUMAN

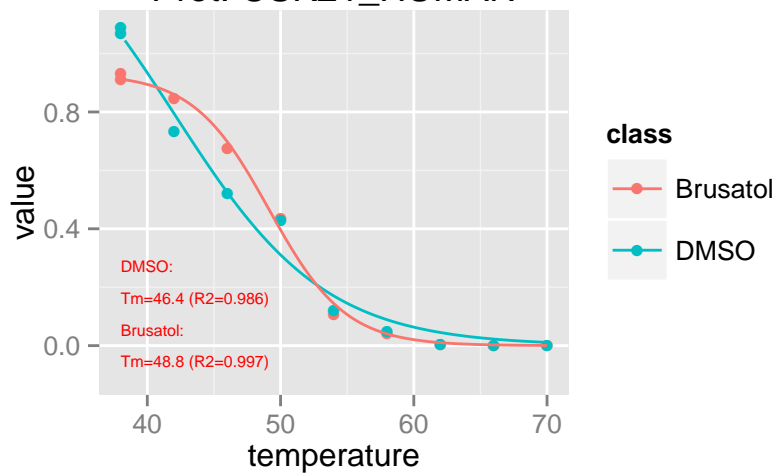

Prot: CSK22\_HUMAN

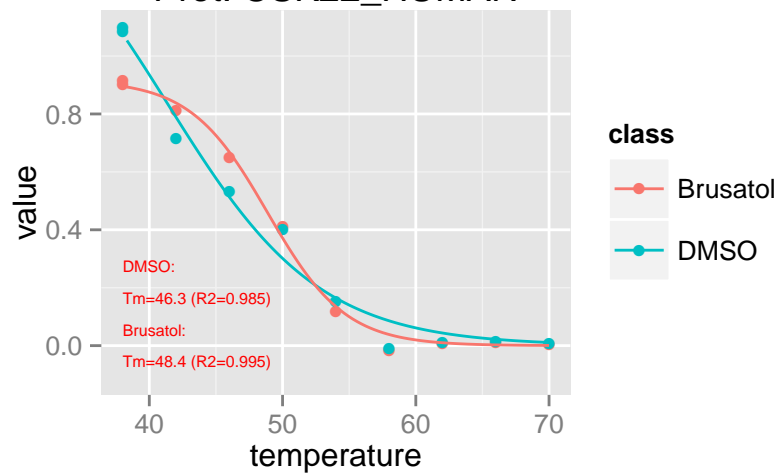

Prot: CSK2B\_HUMAN

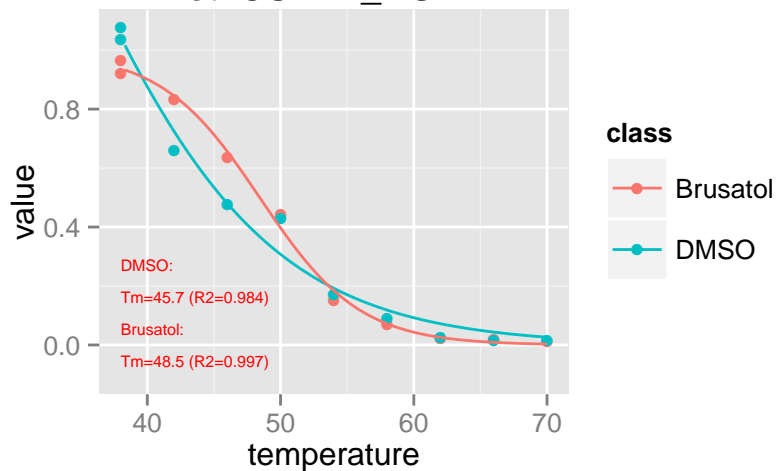

Prot: CSKP\_HUMAN

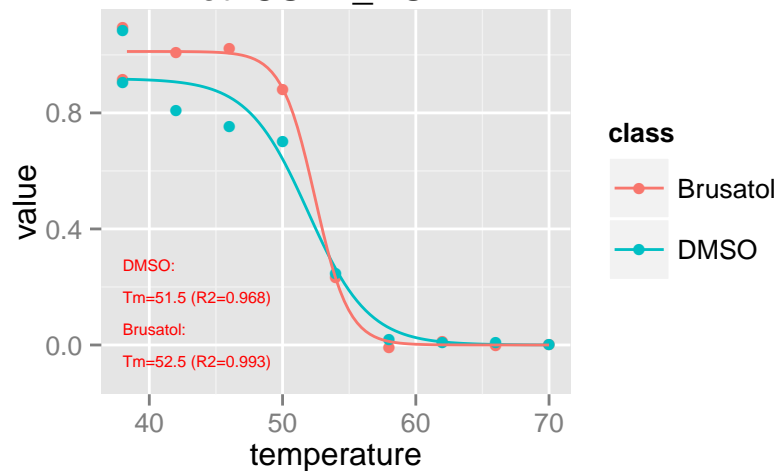

Prot: CSN1\_HUMAN

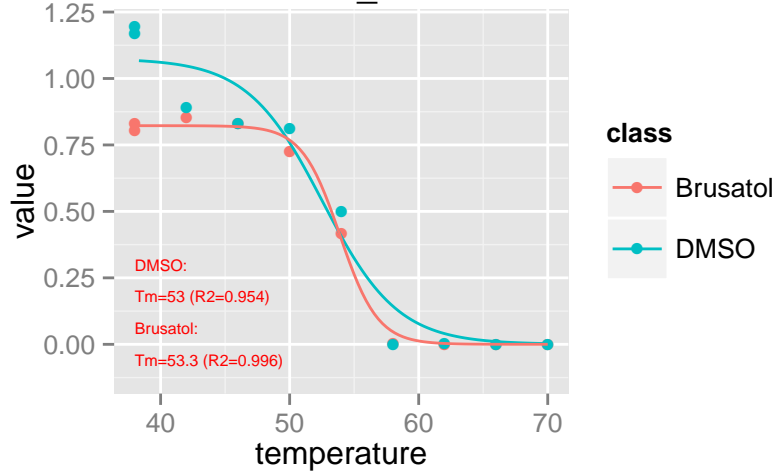

Prot: CSN2\_HUMAN

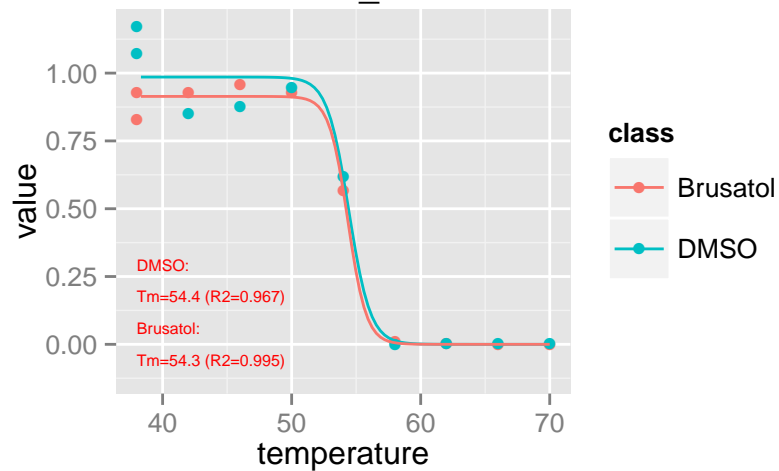

Prot: CSN3\_HUMAN

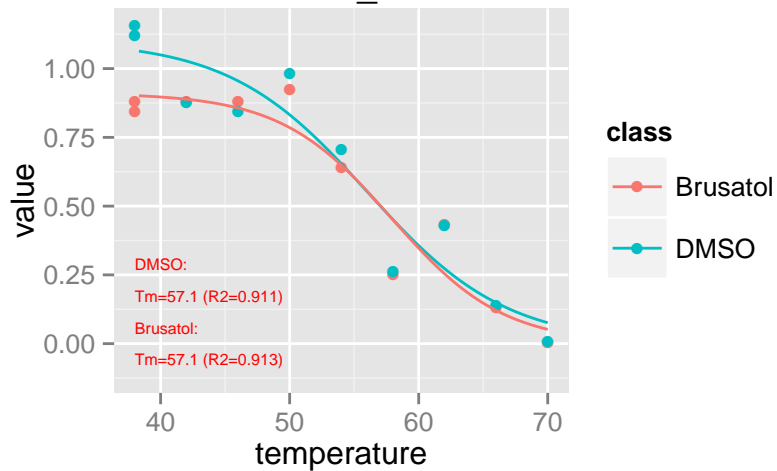

Prot: CSN4\_HUMAN

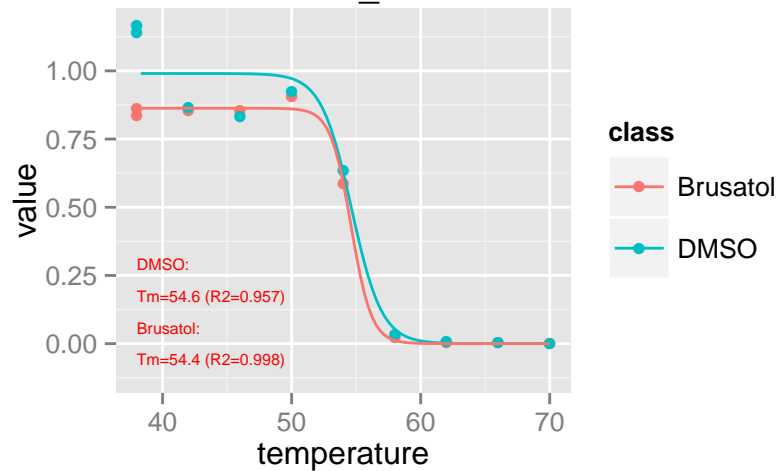

Prot: CSN5\_HUMAN

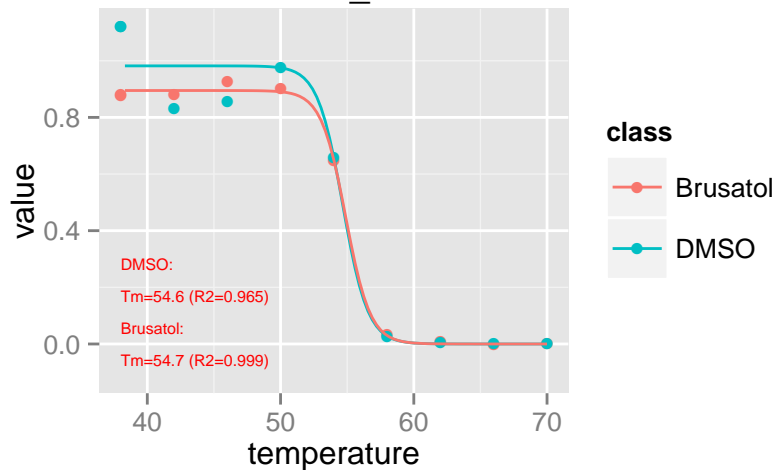

Prot: CSN6\_HUMAN

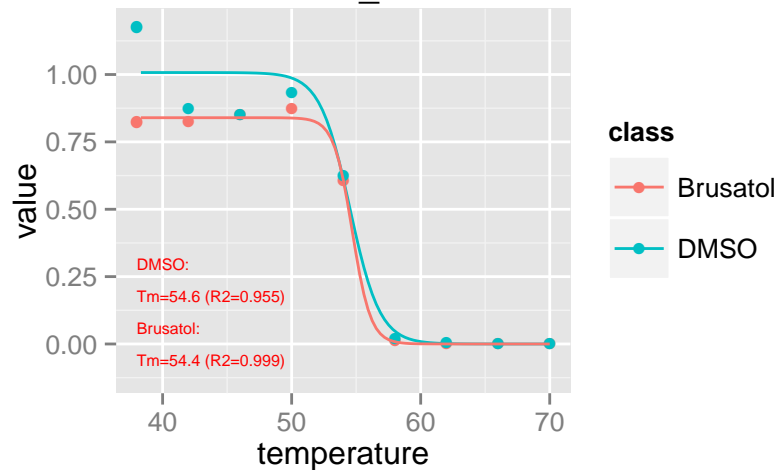

Prot: CSN7A\_HUMAN

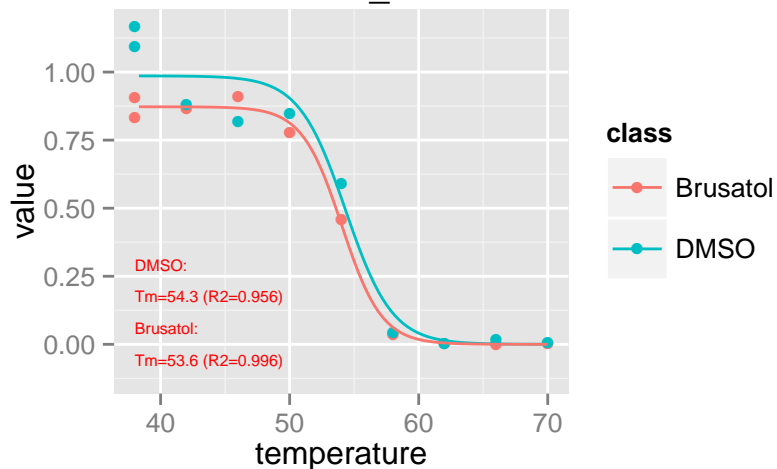

Prot: CSN7B\_HUMAN

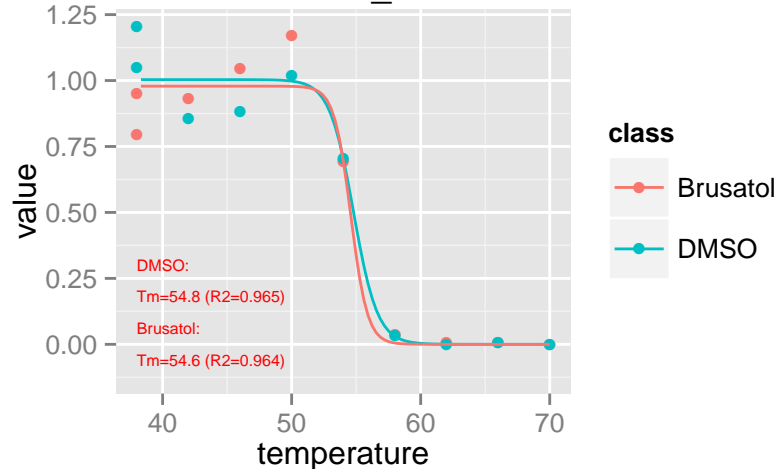

Prot: CSN8\_HUMAN

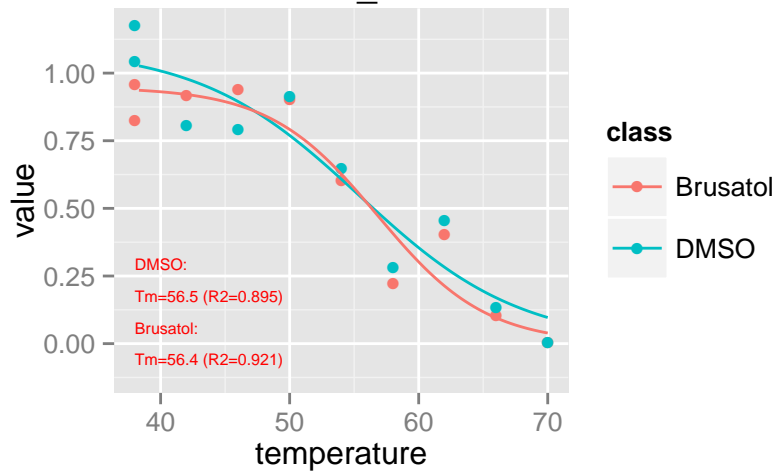

Prot: CSRP1\_HUMAN

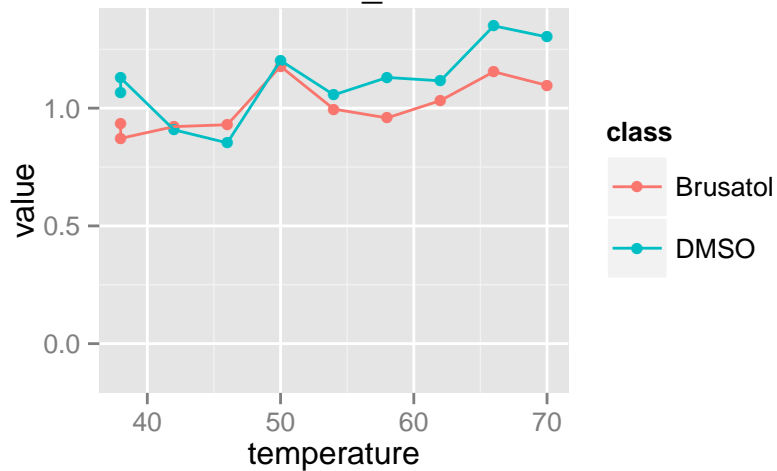

Prot: CSRP2\_HUMAN

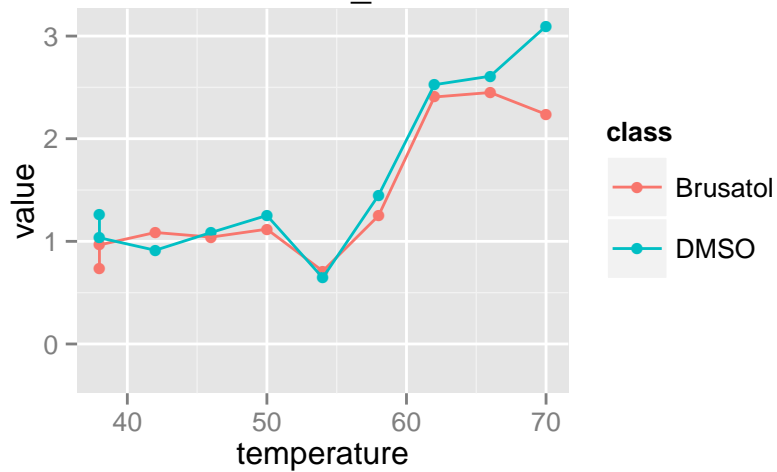

Prot: CSTF1\_HUMAN

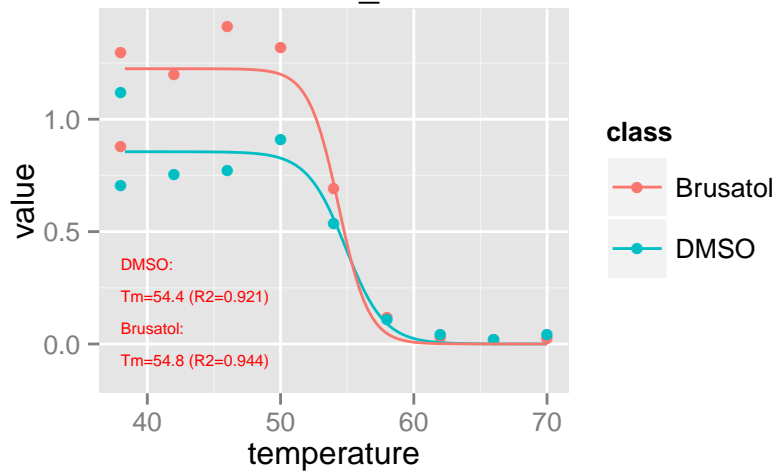

Prot: CSTF2\_HUMAN

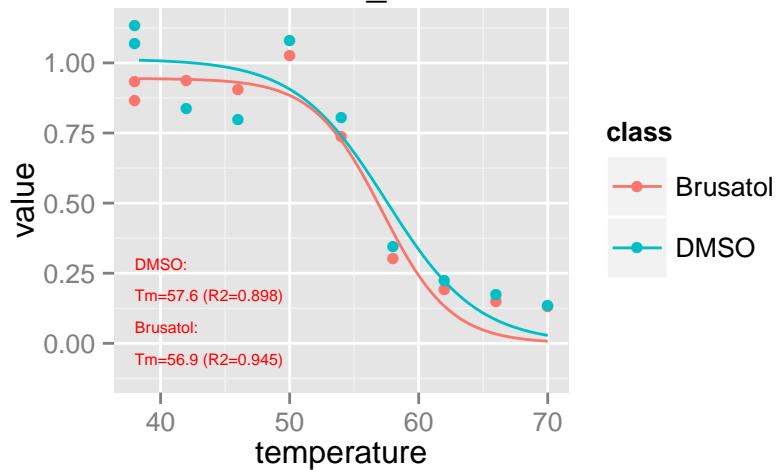

Prot: CSTF3\_HUMAN

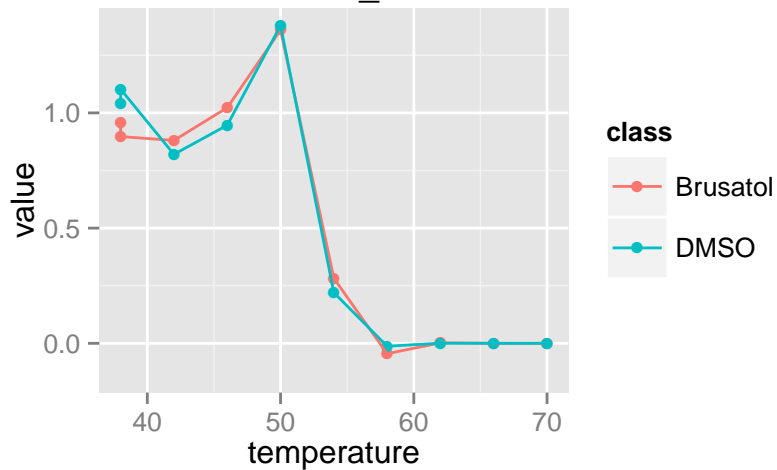

Prot: CT004\_HUMAN

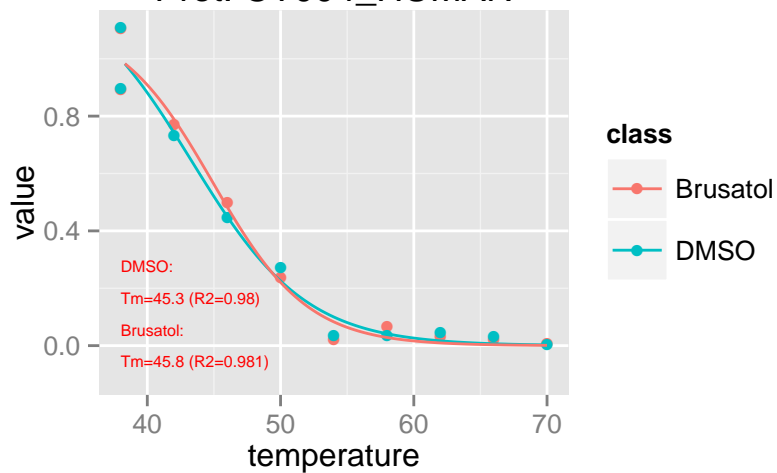

Prot: CT007\_HUMAN

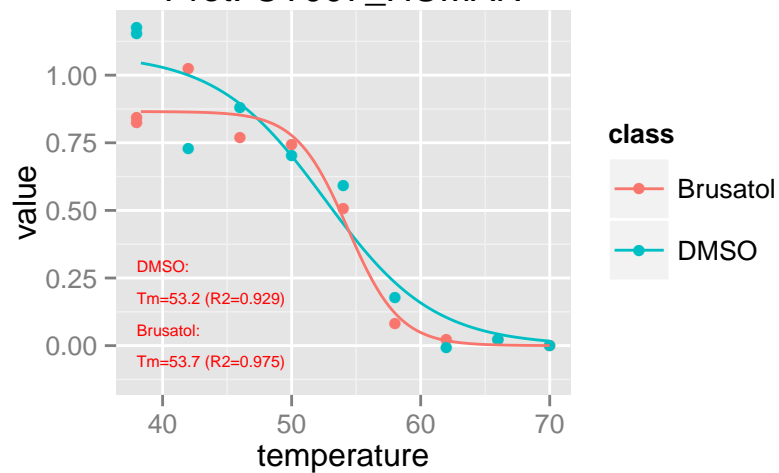

Prot: CT027\_HUMAN

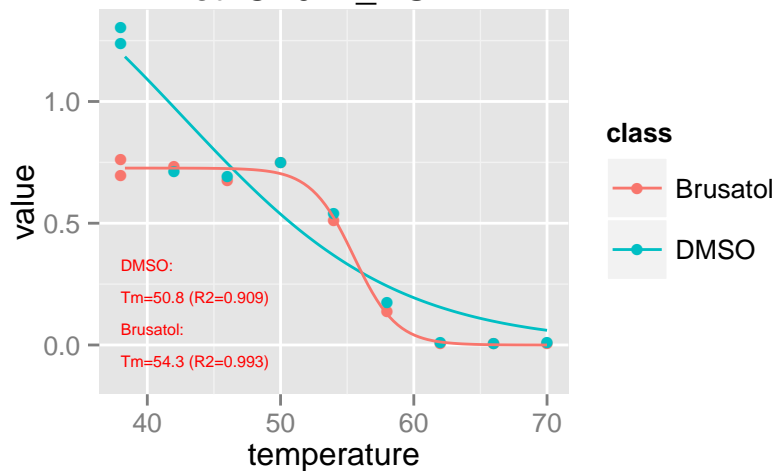

Prot: CT043\_HUMAN

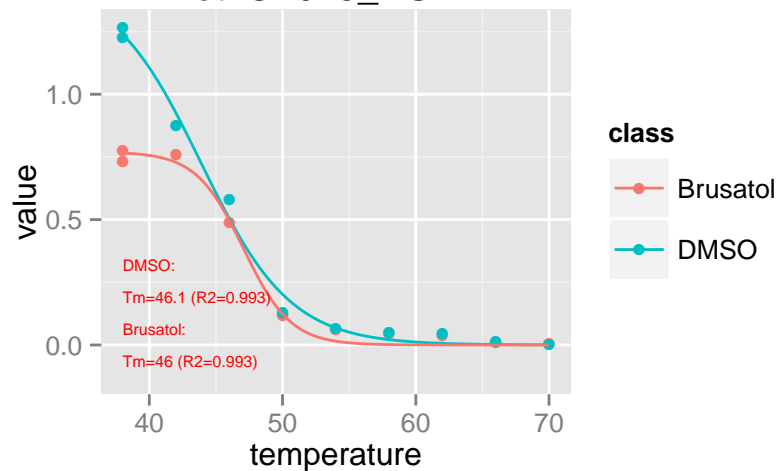

Prot: CTBL1\_HUMAN

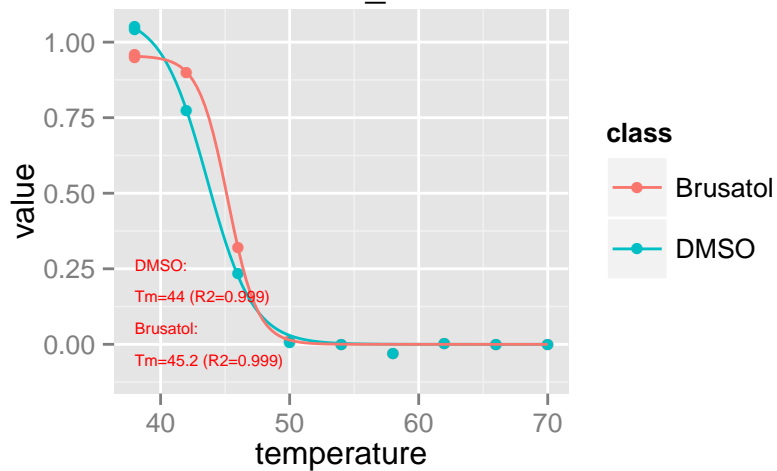

Prot: CTBP1\_HUMAN

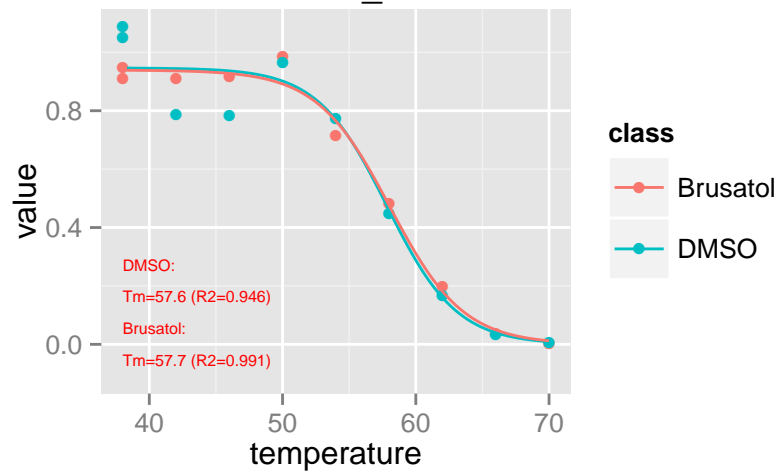

Prot: CTBP2\_HUMAN

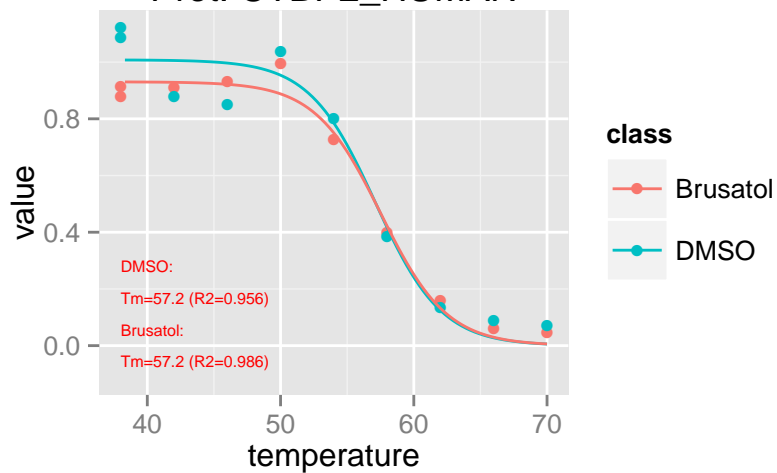

Prot: CTDP1\_HUMAN

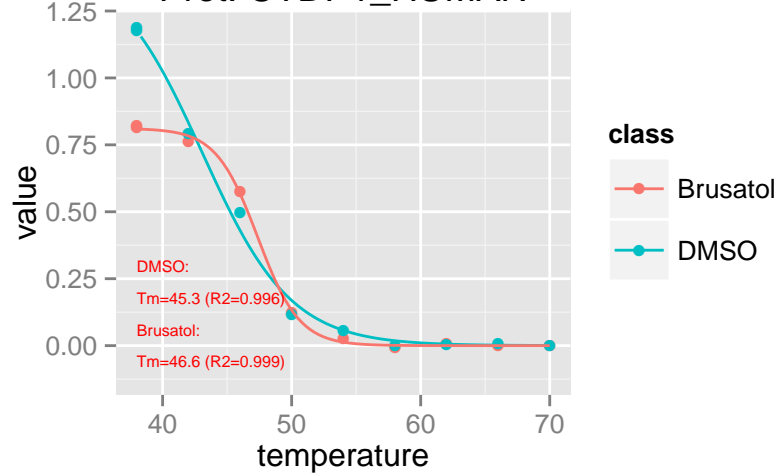

Prot: CTNA1\_HUMAN

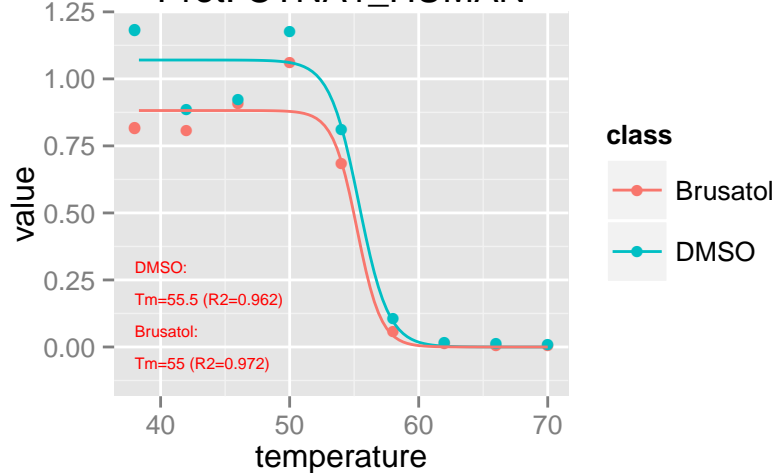

Prot: CTNB1\_HUMAN

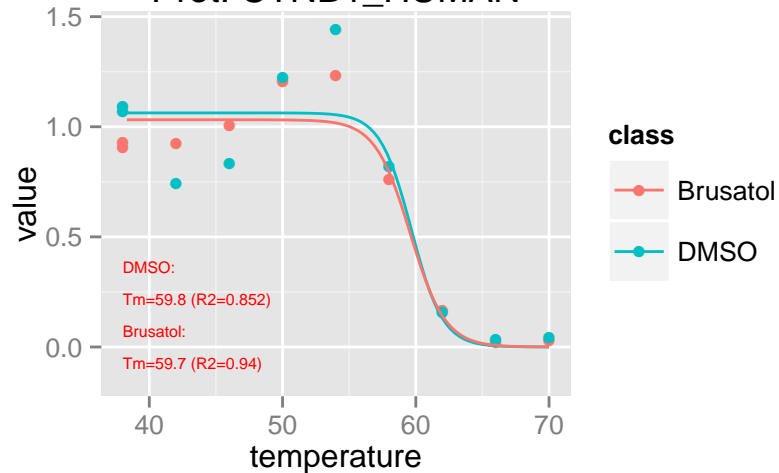

Prot: CTND1\_HUMAN

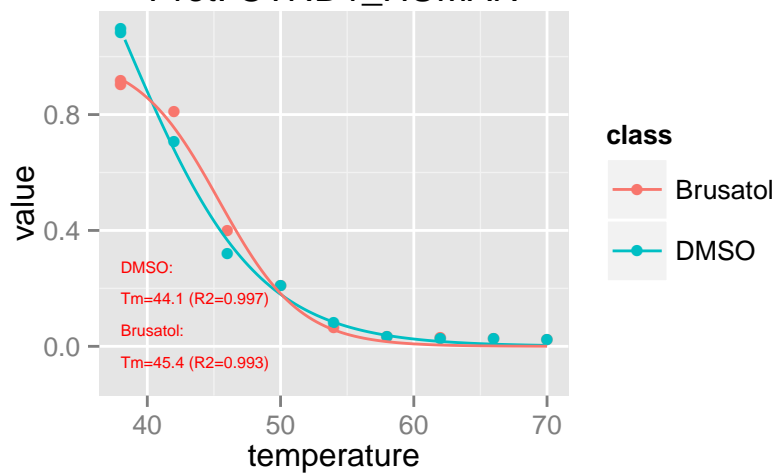

Prot: CTR9\_HUMAN

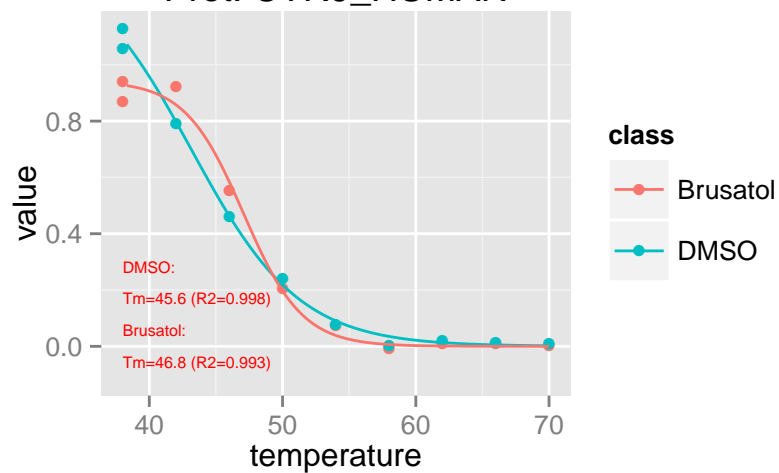

Prot: CTRO\_HUMAN

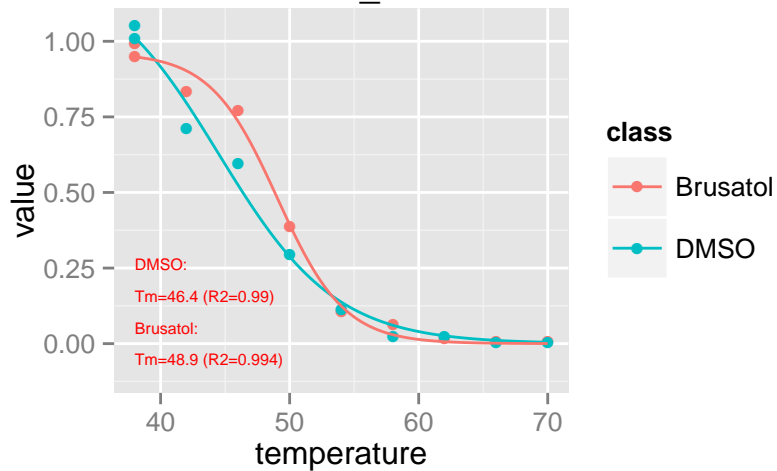

Prot: CTU1\_HUMAN

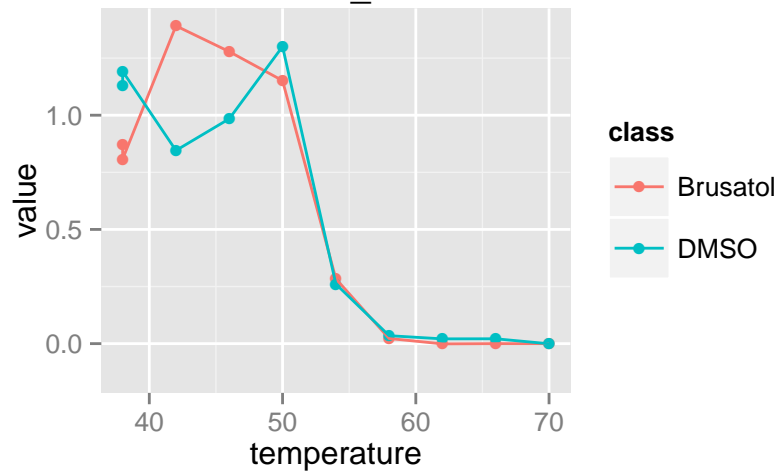

Prot: CTU2\_HUMAN

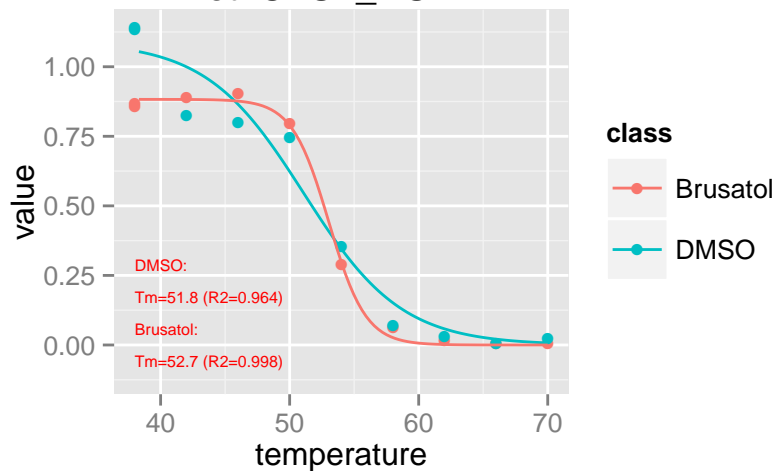

Prot: CU059\_HUMAN

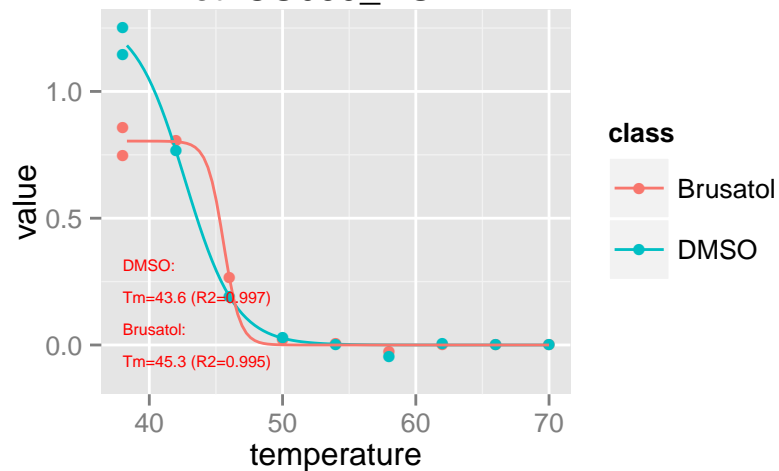

Prot: CUL1\_HUMAN

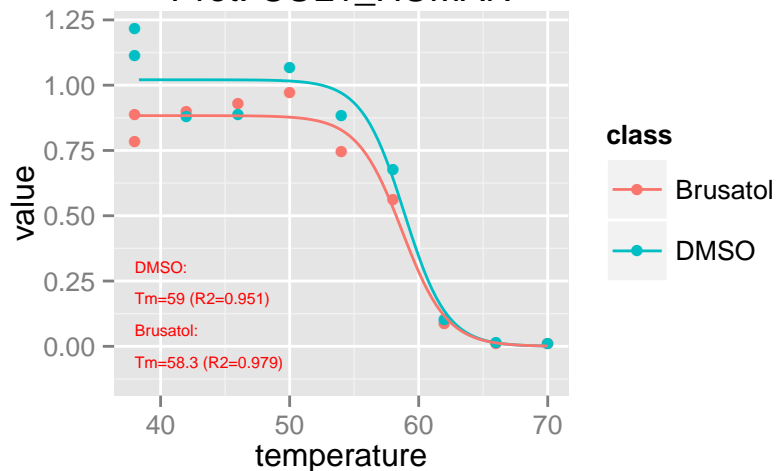

Prot: CUL2\_HUMAN

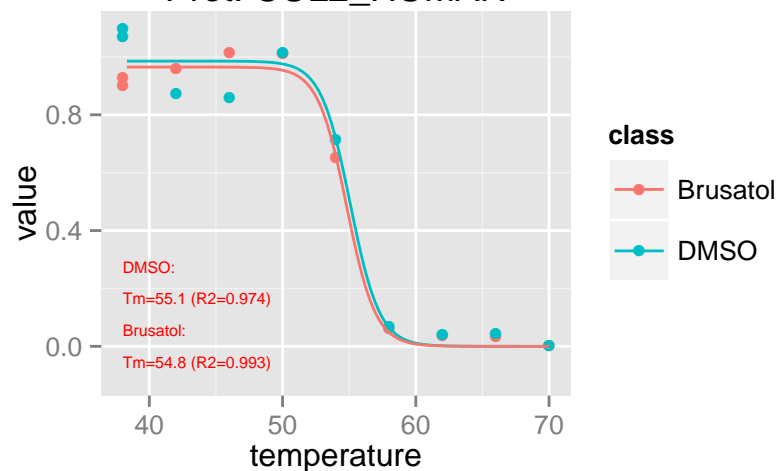

Prot: CUL3\_HUMAN

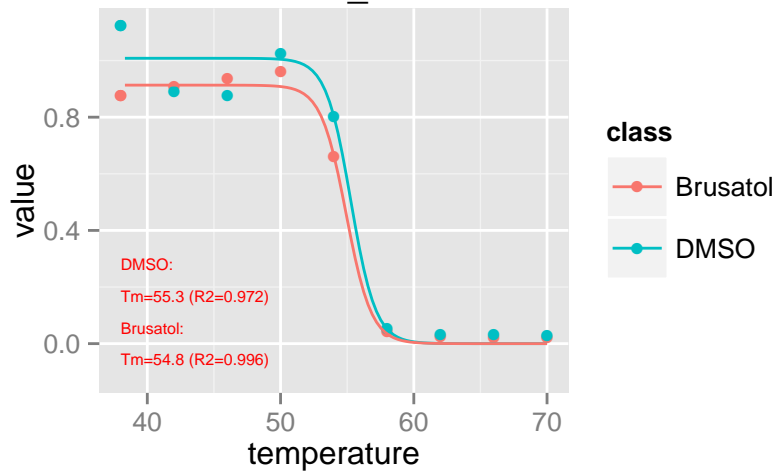

Prot: CUL4A\_HUMAN

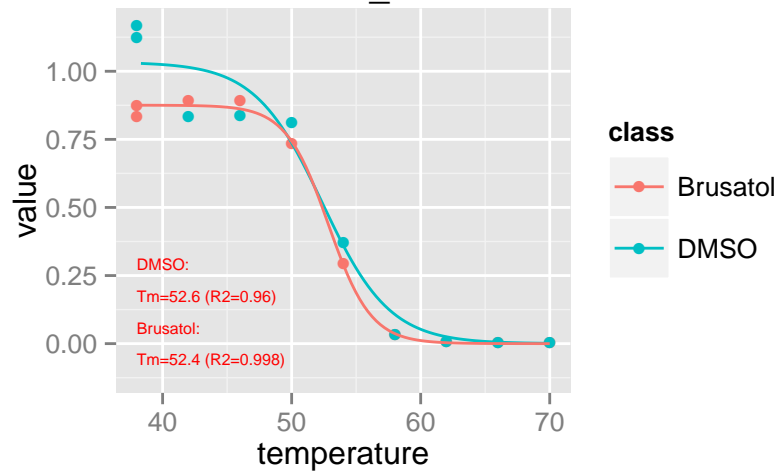

Prot: CUL4B\_HUMAN

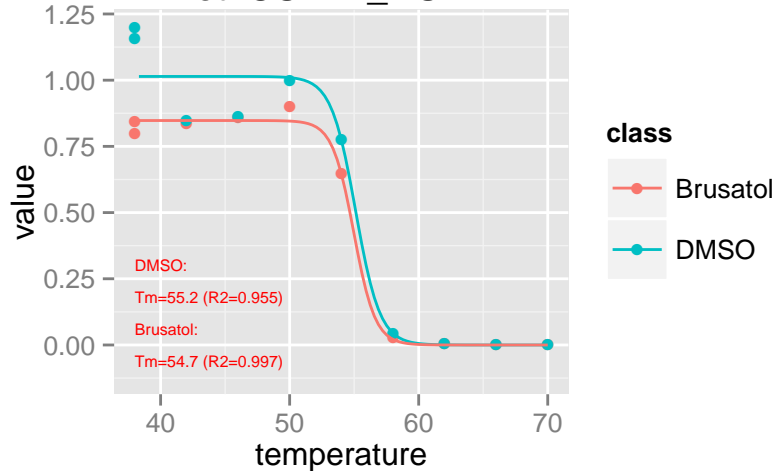

Prot: CUL5\_HUMAN

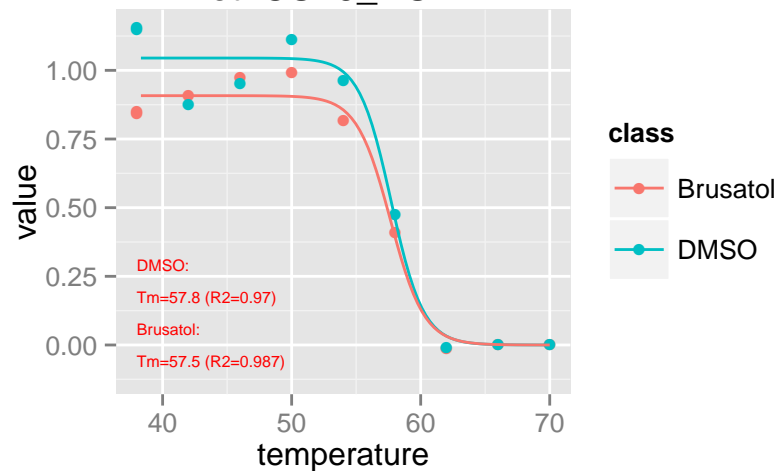

Prot: CUTA\_HUMAN

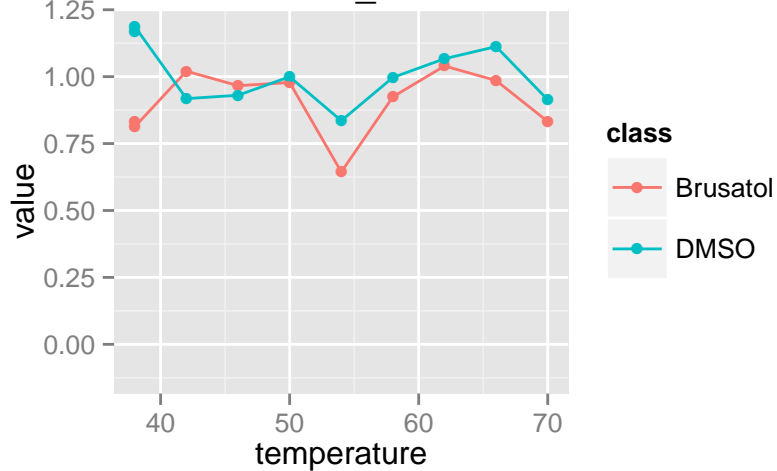

Prot: CUTC\_HUMAN

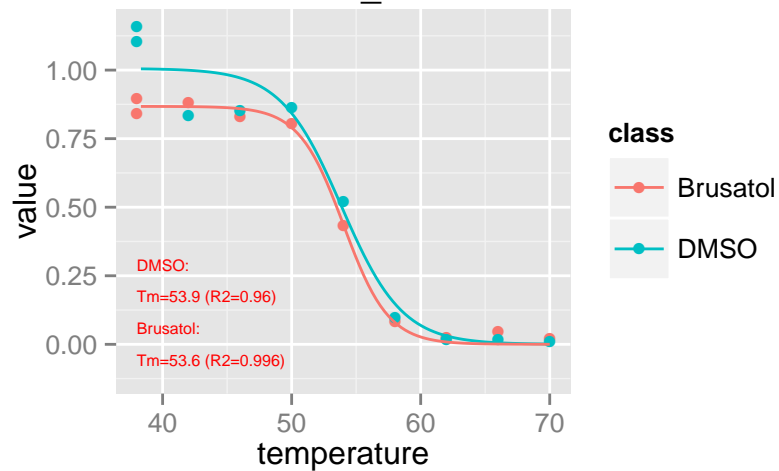

Prot: CWC15\_HUMAN

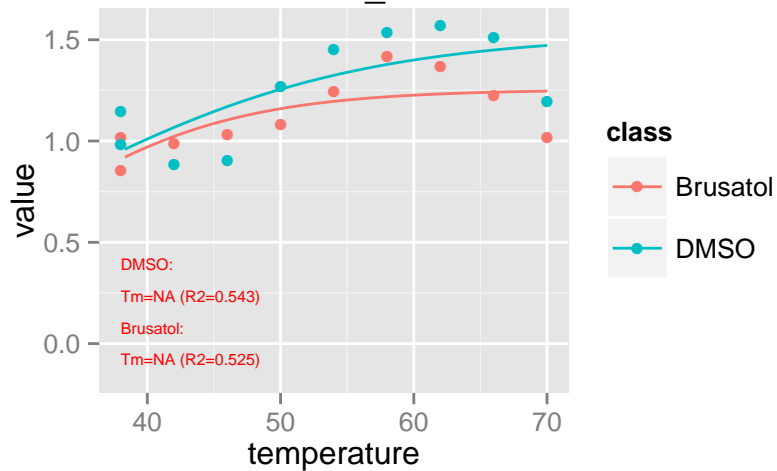

Prot: CWC27\_HUMAN

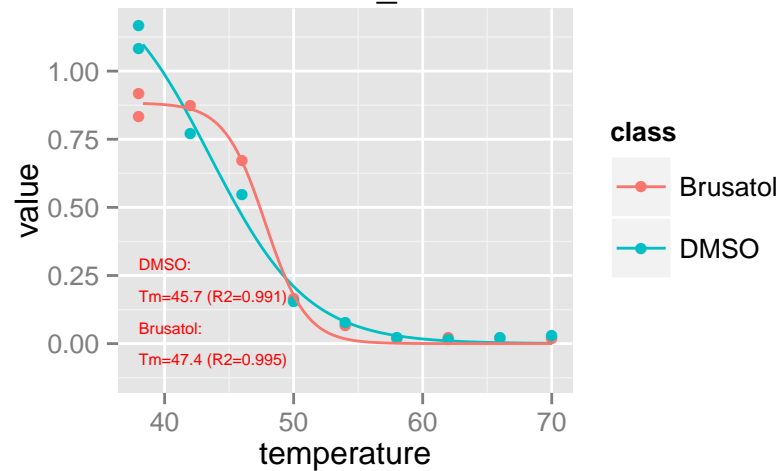

Prot: CX026\_HUMAN

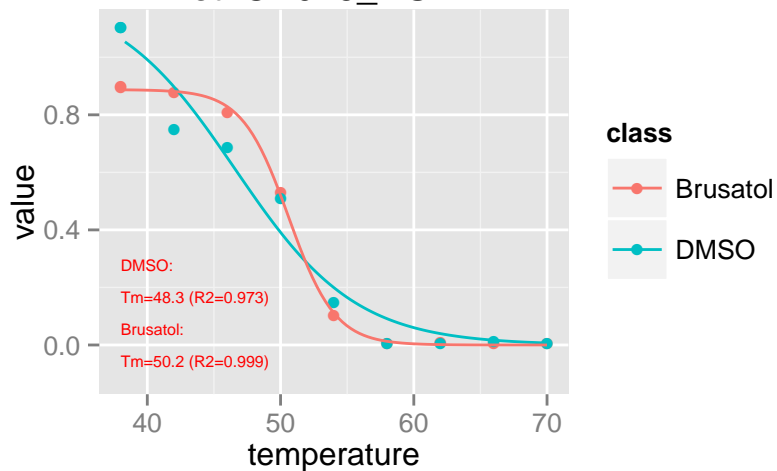

Prot: CX038\_HUMAN

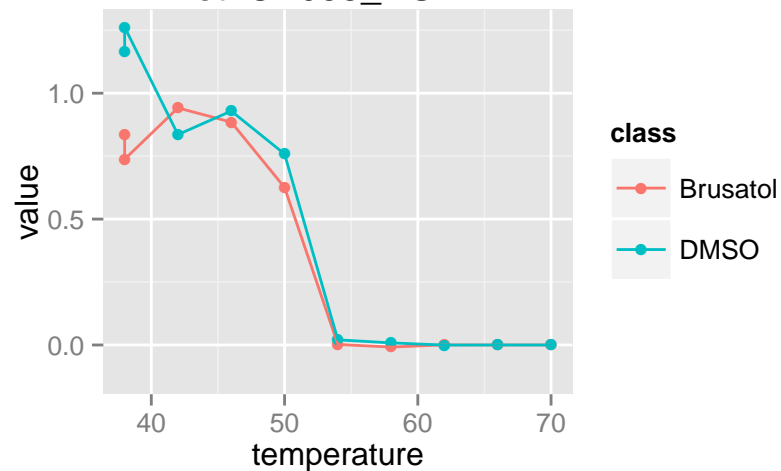

Prot: CX6B1\_HUMAN

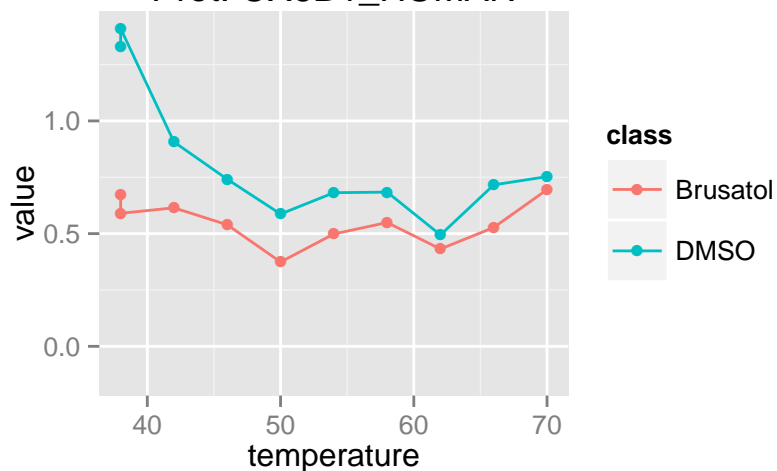

Prot: CYBP\_HUMAN

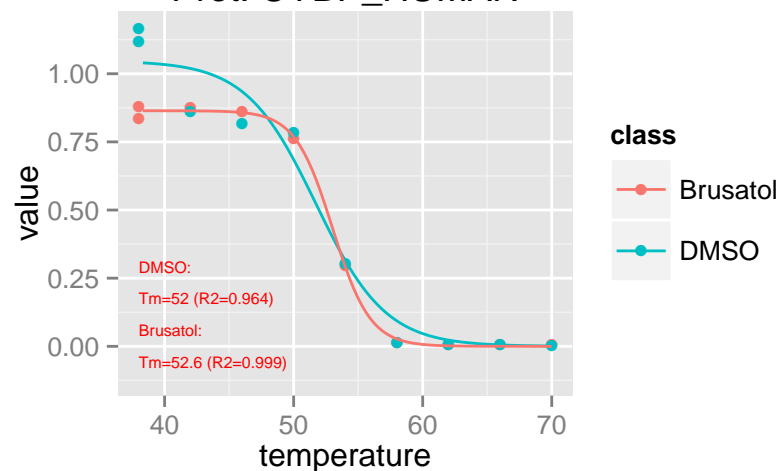



Prot: CYC\_HUMAN

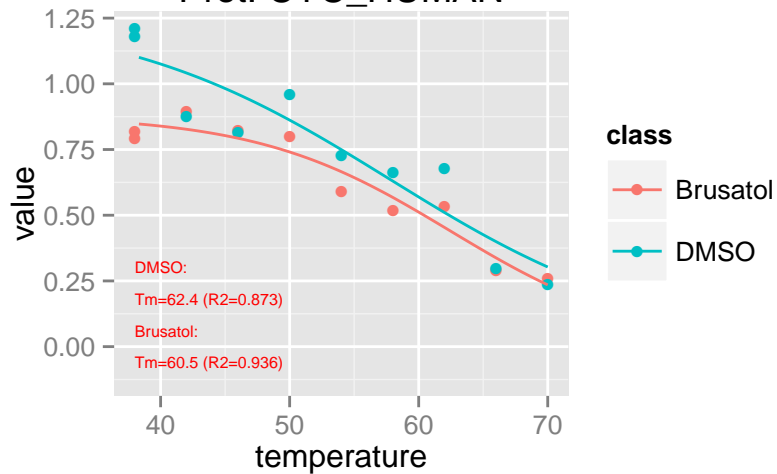

Prot: CYFP1\_HUMAN

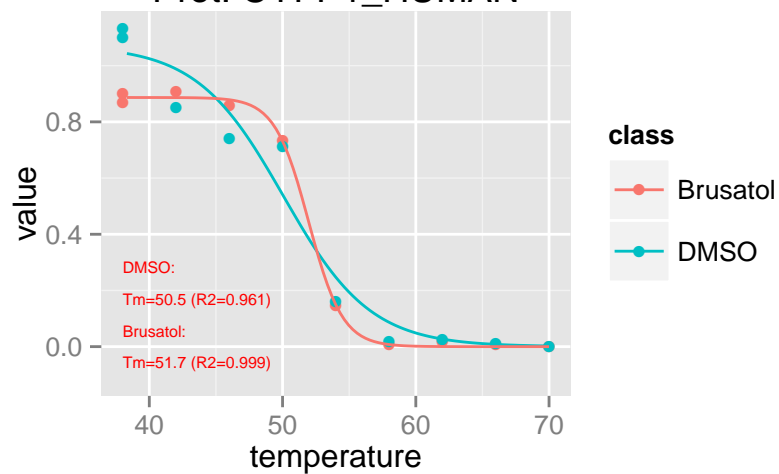

Prot: CYTB\_HUMAN

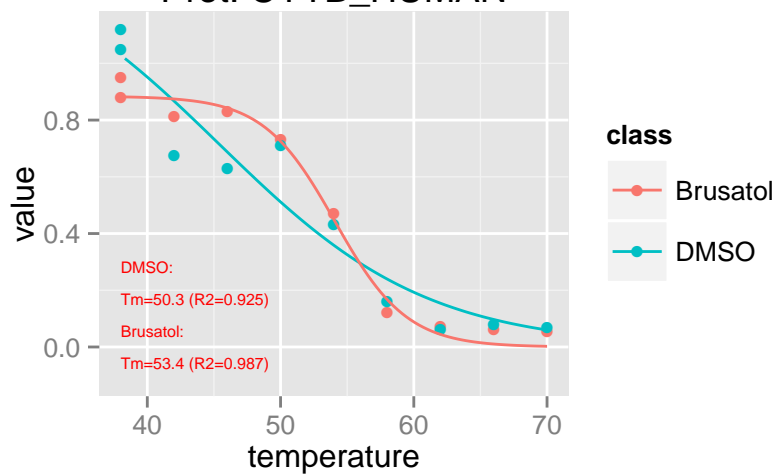

Prot: CYTC\_HUMAN

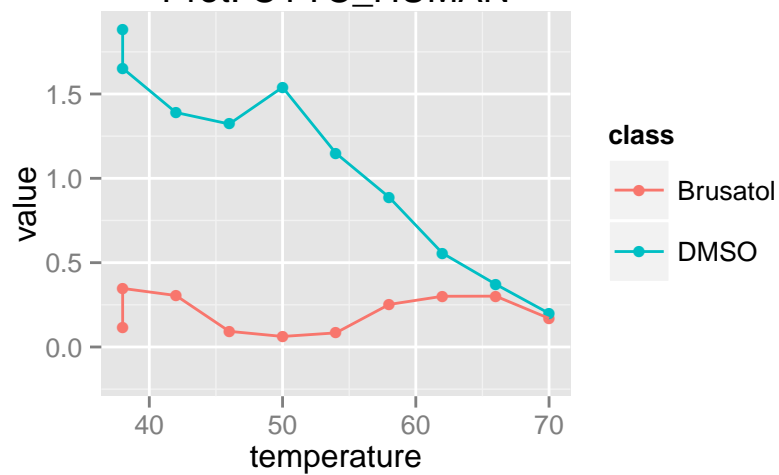

Prot: CYTSA\_HUMAN

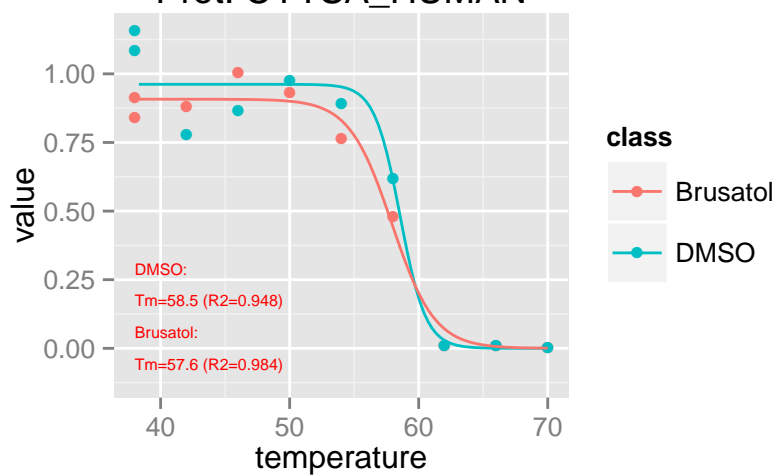

Prot: D6RDG3\_HUMAN

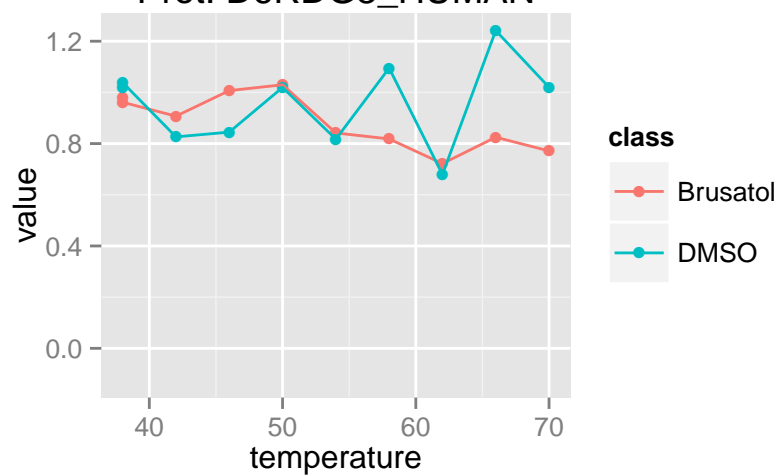

Prot: DAZP1\_HUMAN

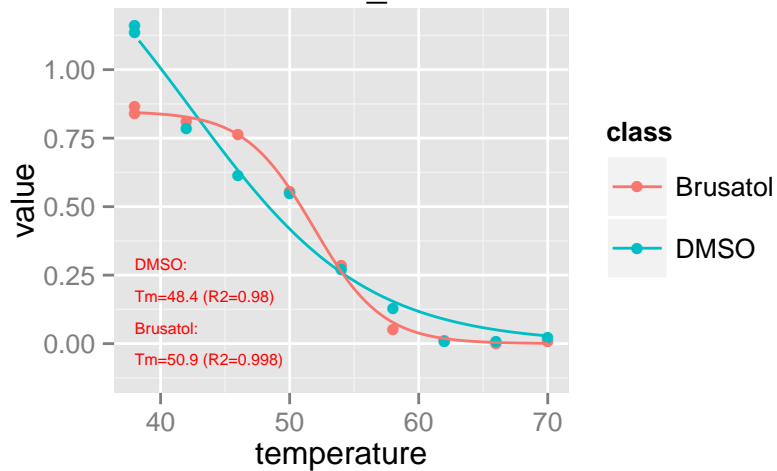

Prot: DBLOH\_HUMAN

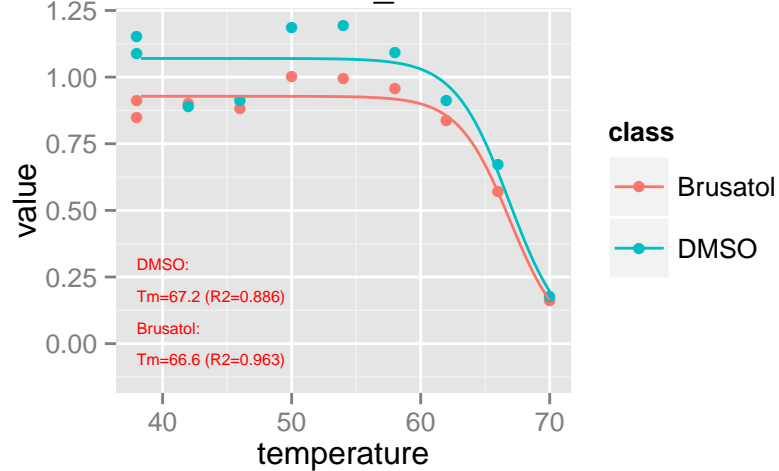

Prot: DBNL\_HUMAN

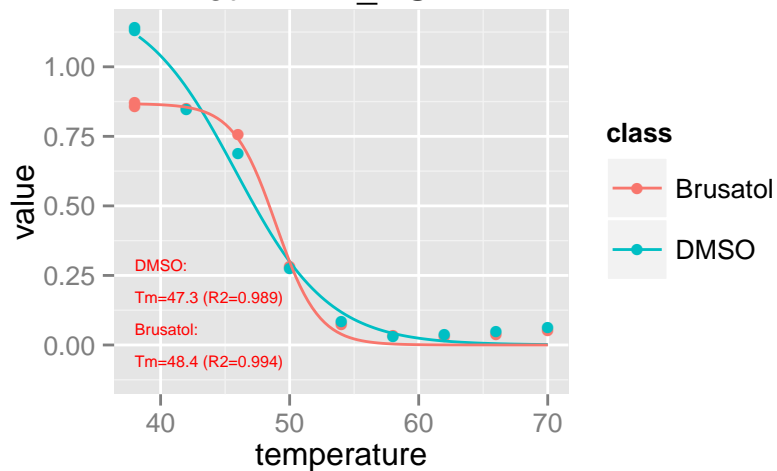

Prot: DBPA\_HUMAN

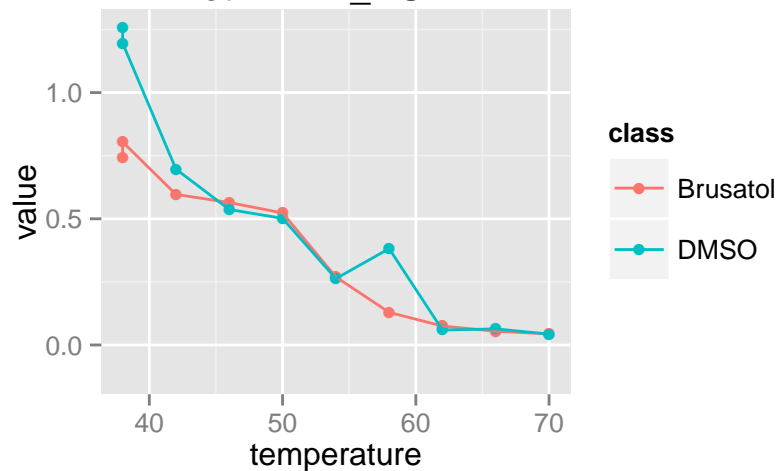

Prot: DBR1\_HUMAN

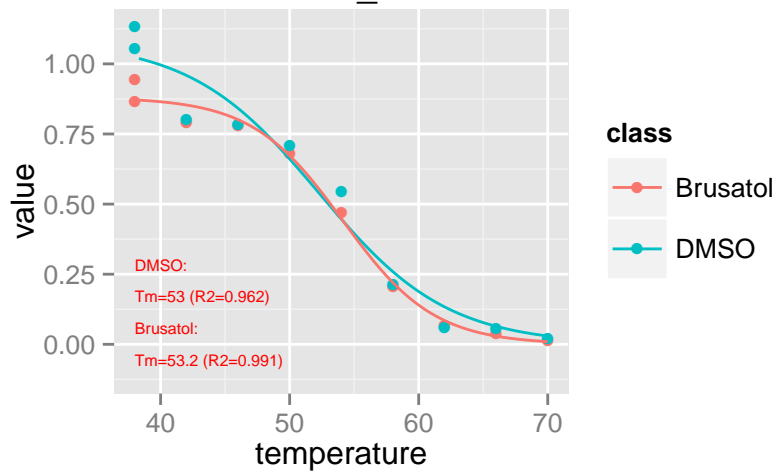

Prot: DC1I2\_HUMAN

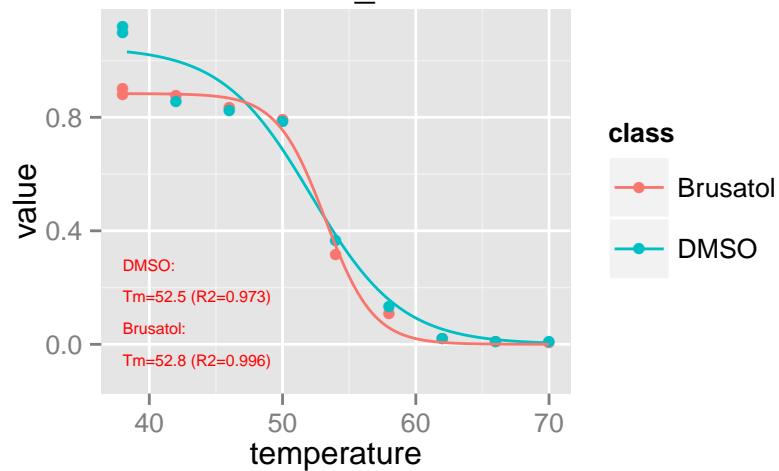

Prot: DC1L1\_HUMAN

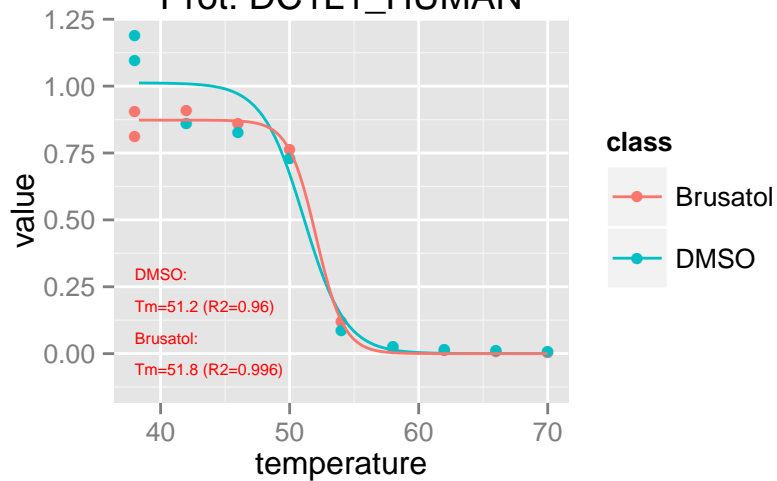

Prot: DC1L2\_HUMAN

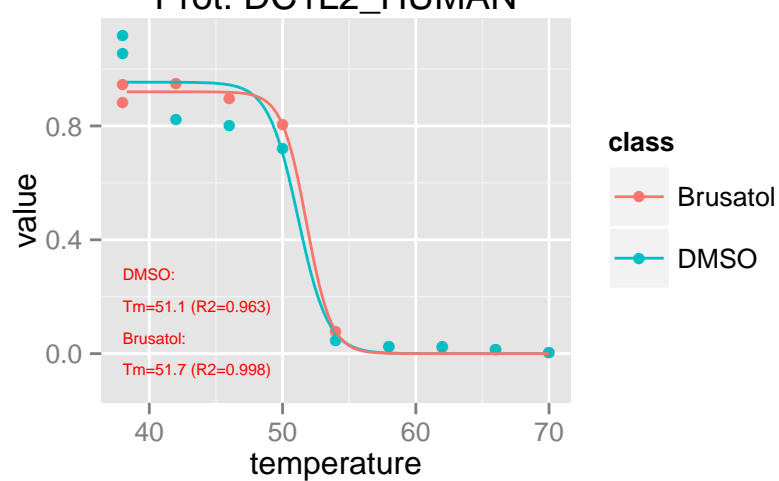

Prot: DCAF6\_HUMAN

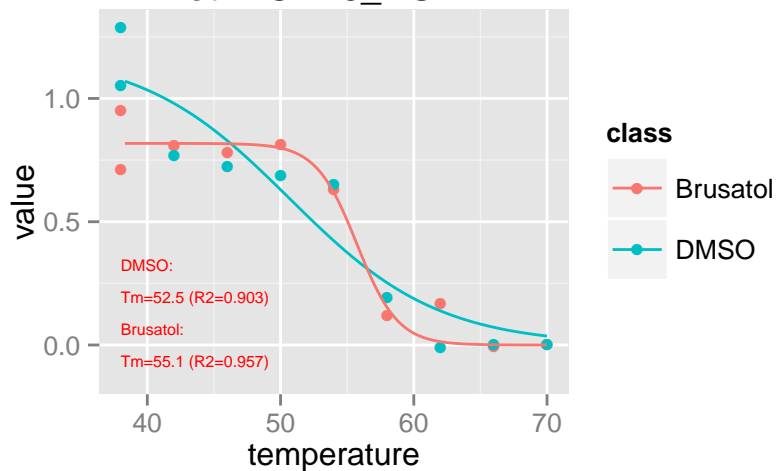

Prot: DCAF7\_HUMAN

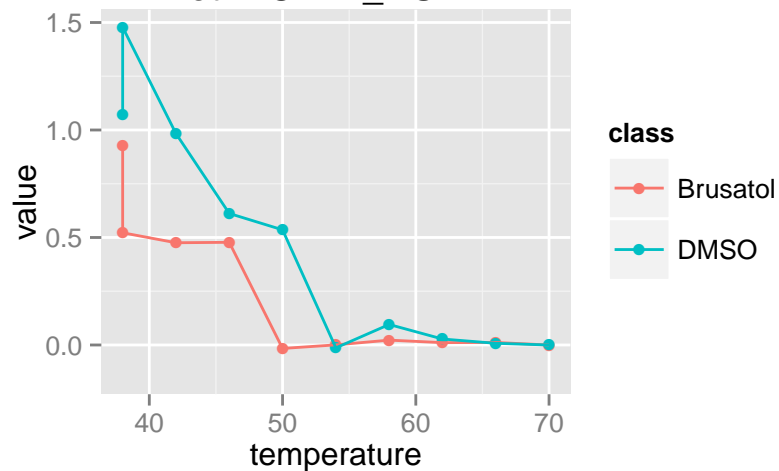

Prot: DCBD2\_HUMAN

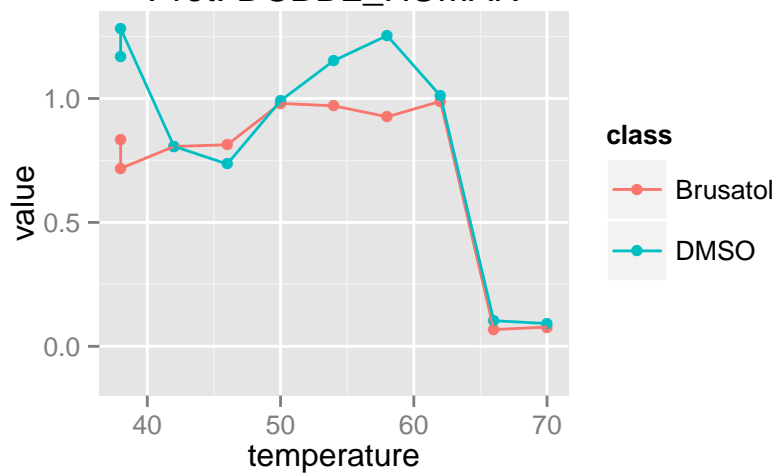

Prot: DCDC2\_HUMAN

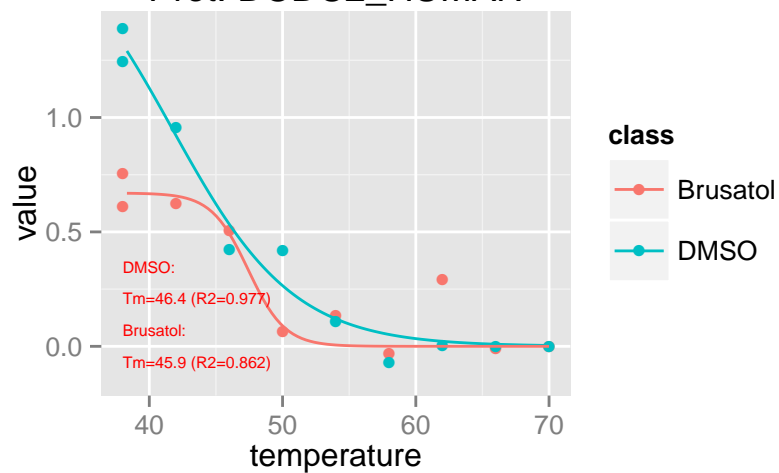

Prot: DCK\_HUMAN

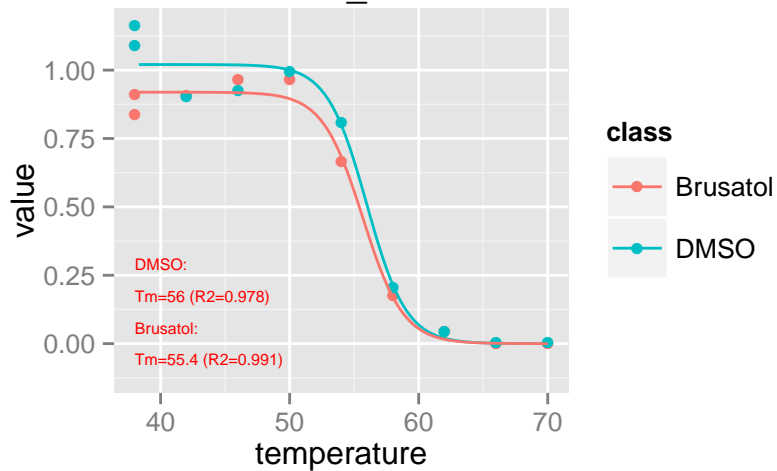

Prot: DCNL1\_HUMAN

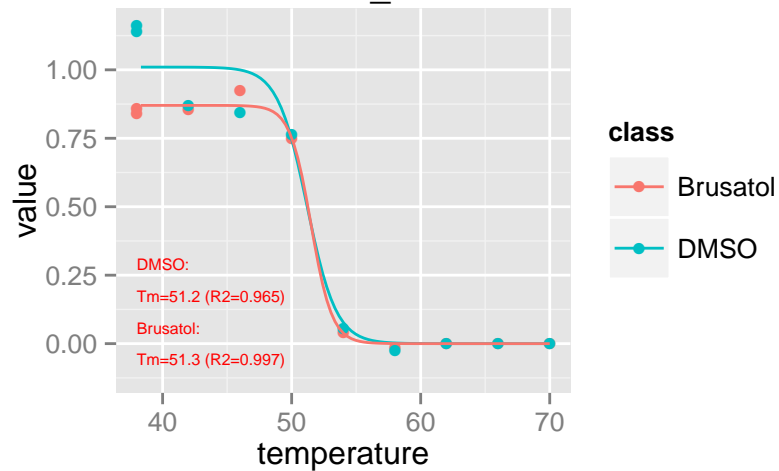

Prot: DCNL5\_HUMAN

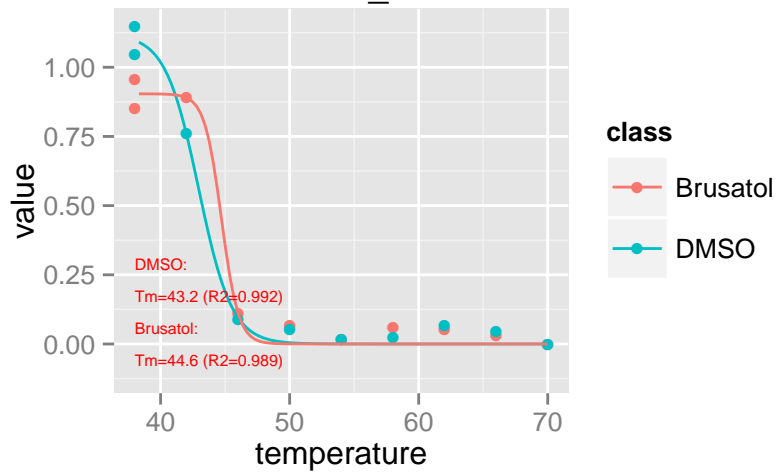

Prot: DCPS\_HUMAN

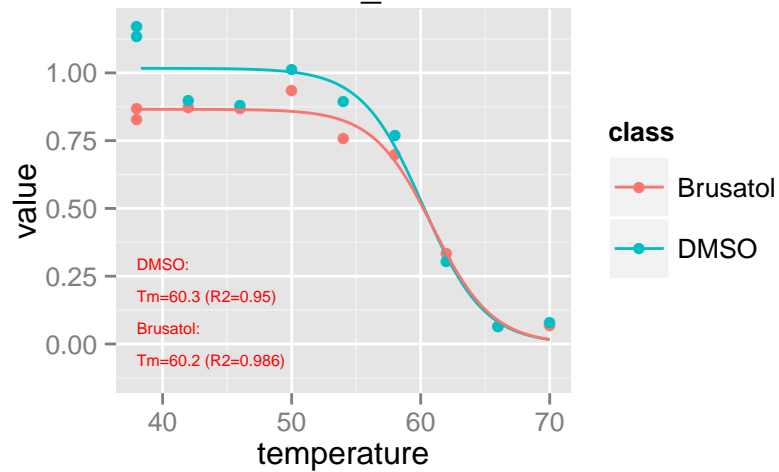

Prot: DCTD\_HUMAN

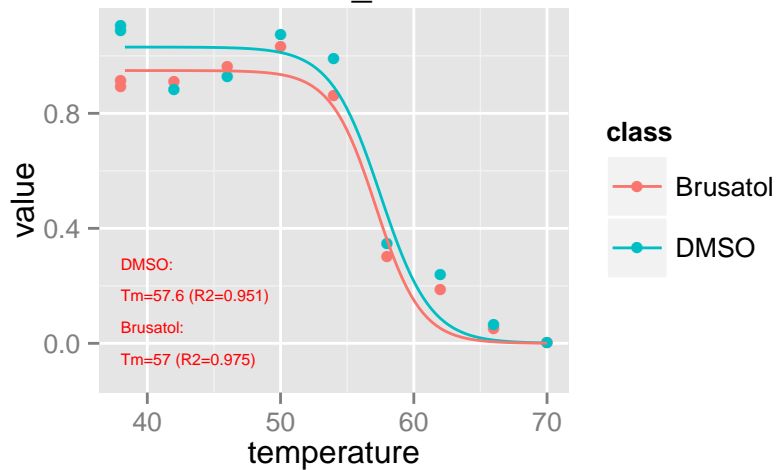

Prot: DCTN1\_HUMAN

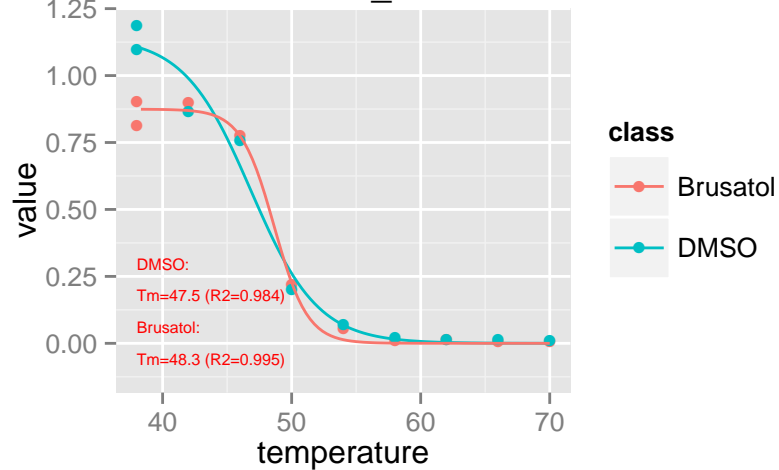

Prot: DCTN2\_HUMAN

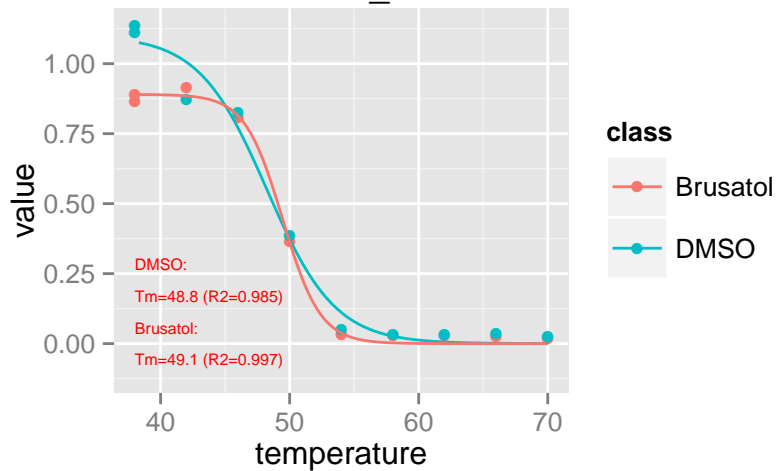

Prot: DCTN3\_HUMAN

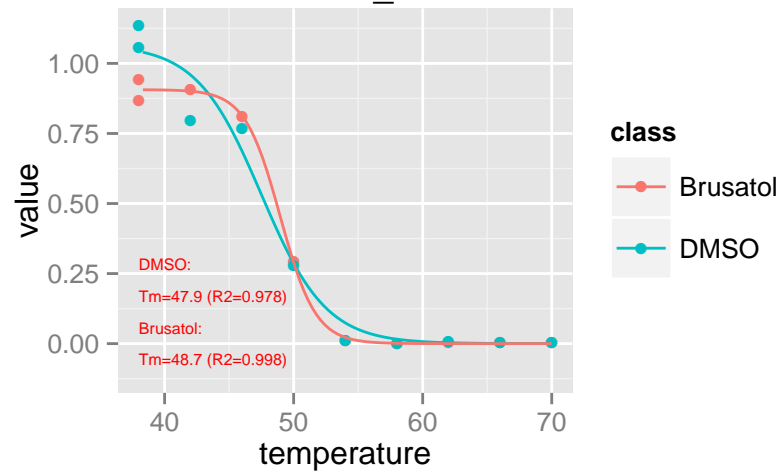

Prot: DCTN4\_HUMAN

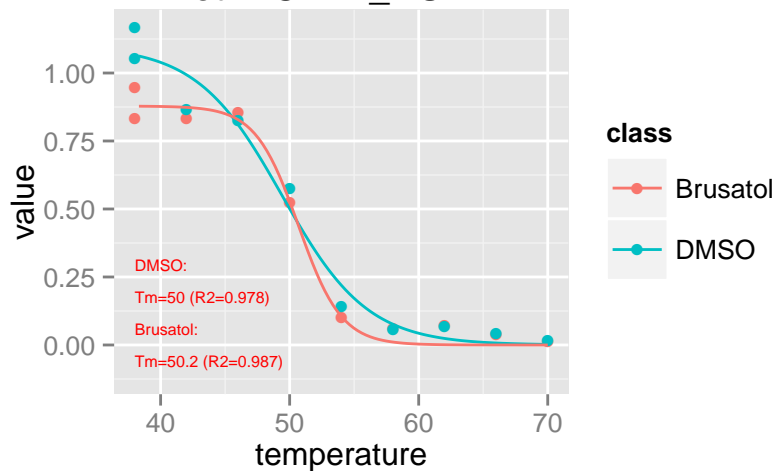

Prot: DCTN6\_HUMAN

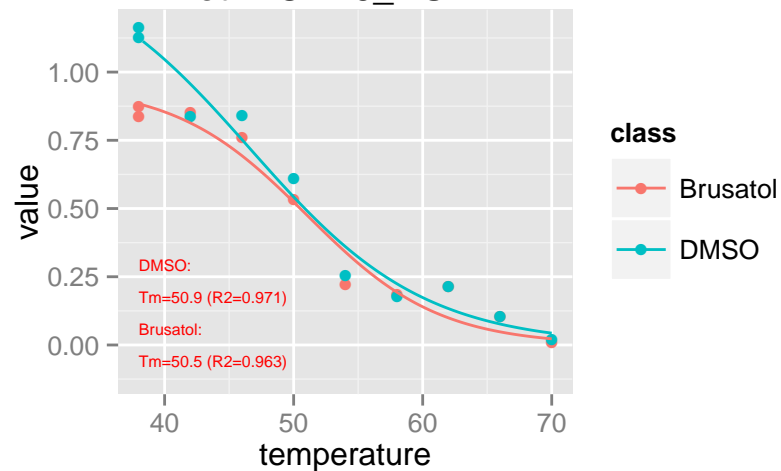

Prot: DCTP1\_HUMAN

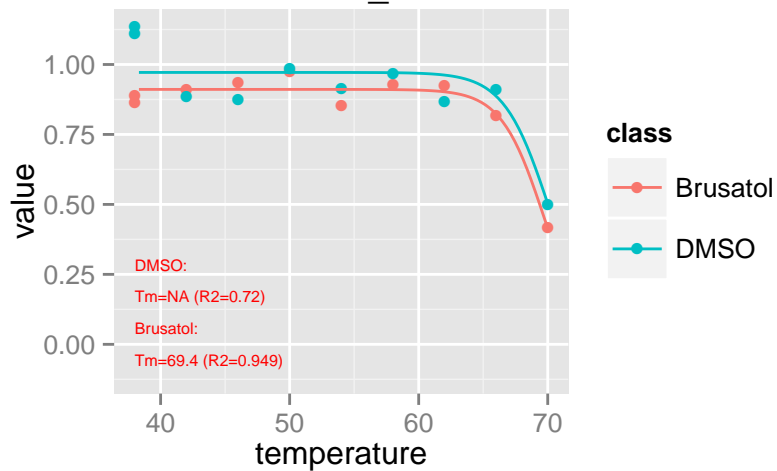

Prot: DCUP\_HUMAN

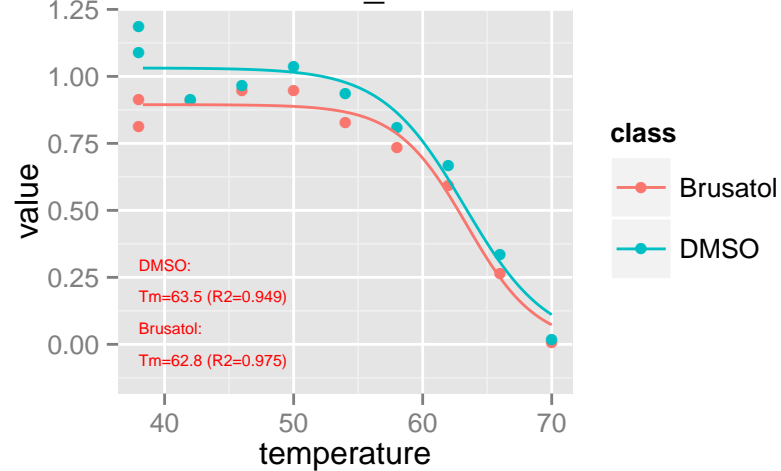

Prot: DCXR\_HUMAN

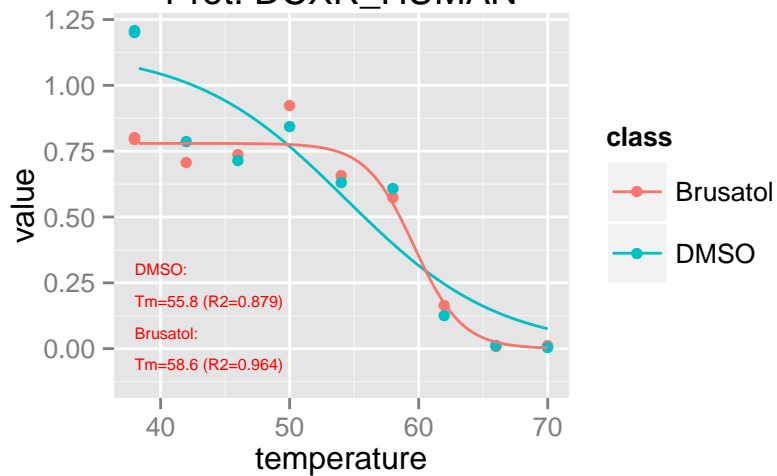

Prot: DD19A\_HUMAN

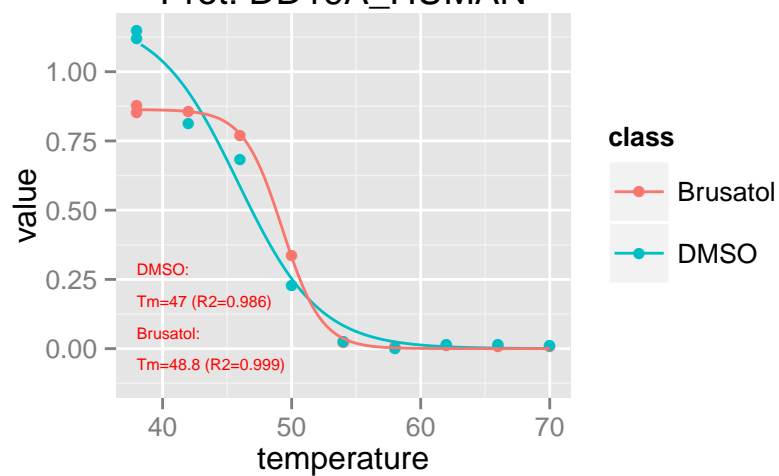

Prot: DDAH1\_HUMAN

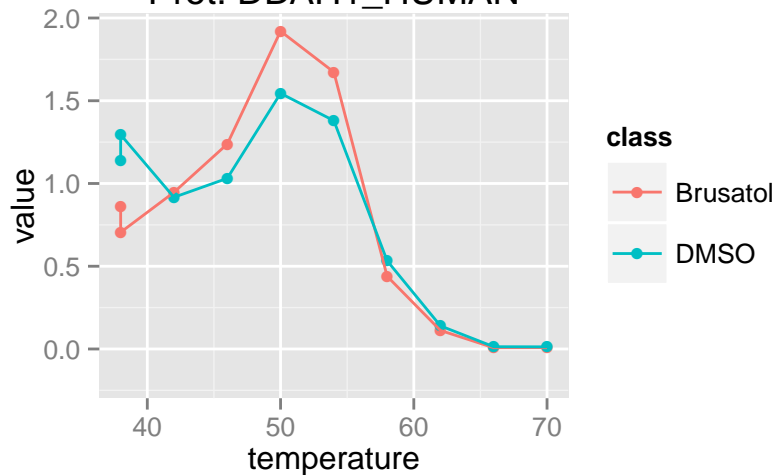

Prot: DDAH2\_HUMAN

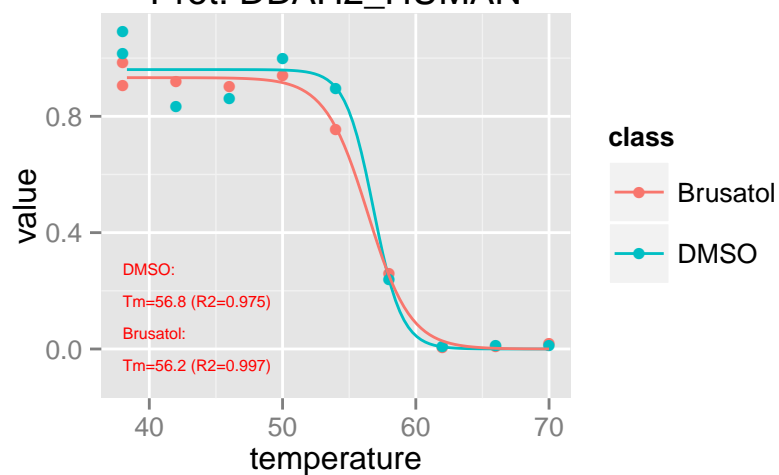

Prot: DDB1\_HUMAN

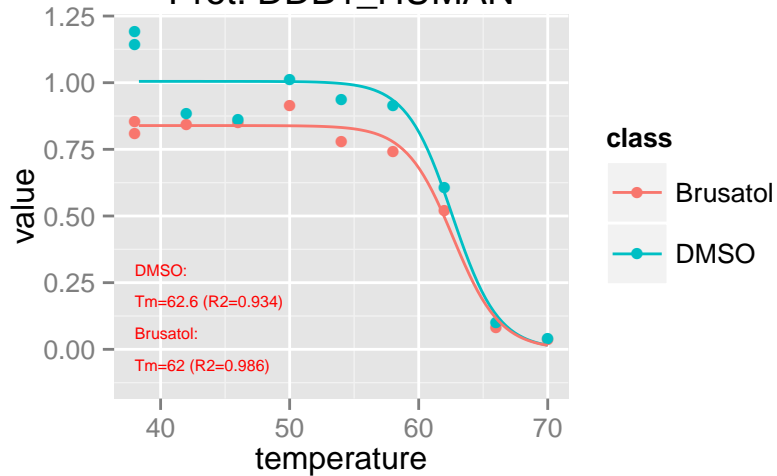

Prot: DDB2\_HUMAN

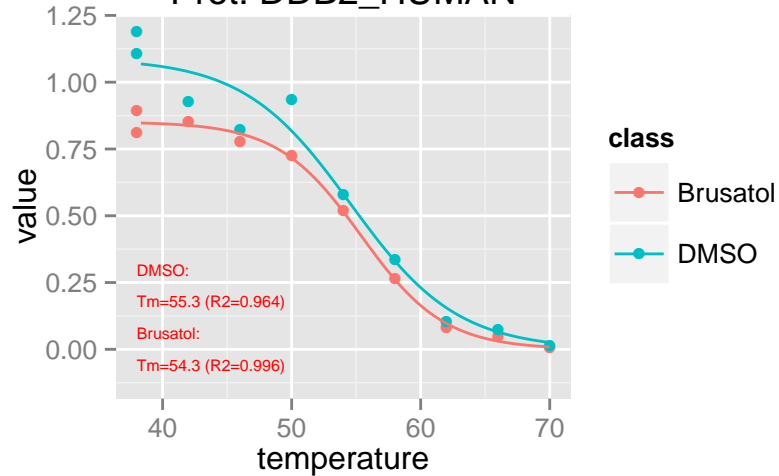

Prot: DDHD2\_HUMAN

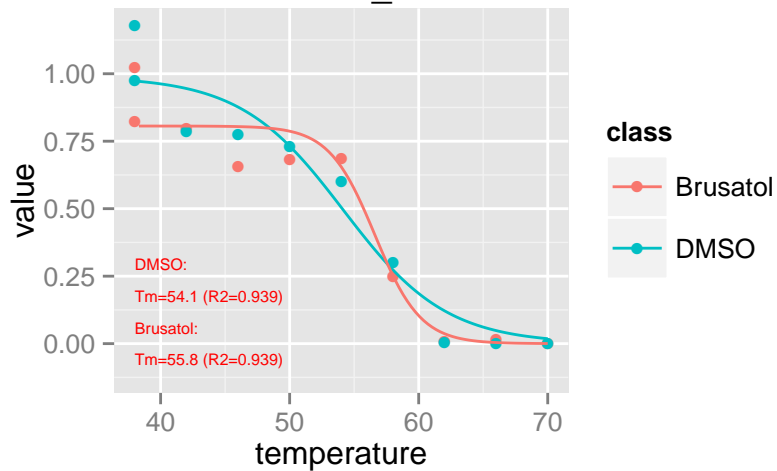

Prot: DDI2\_HUMAN

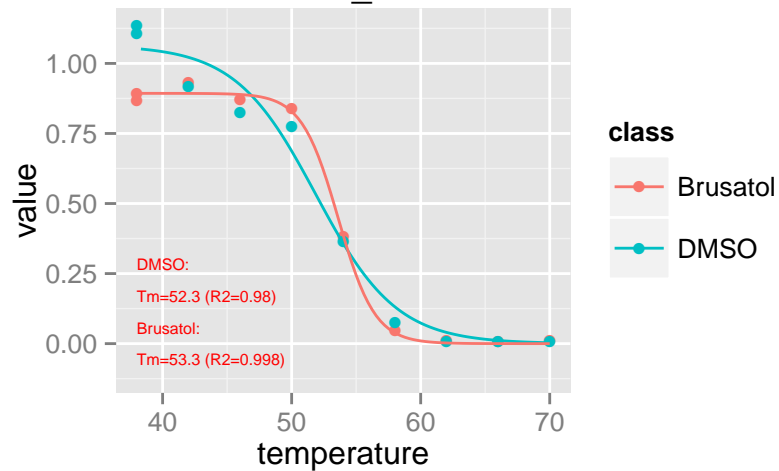

Prot: DDTL\_HUMAN

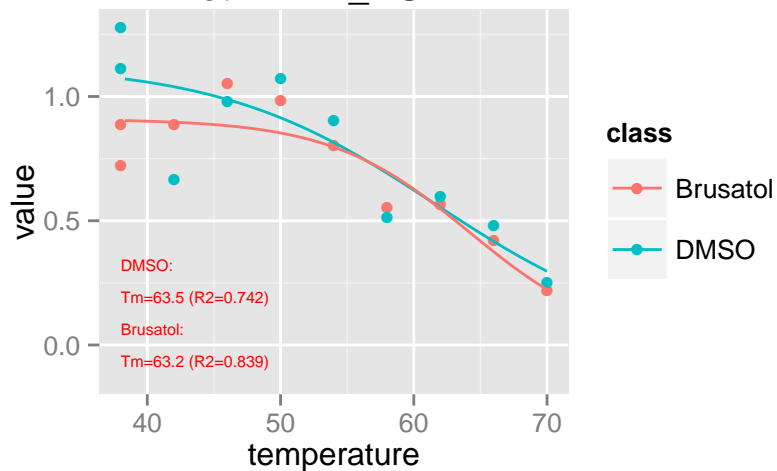

Prot: DDX1\_HUMAN

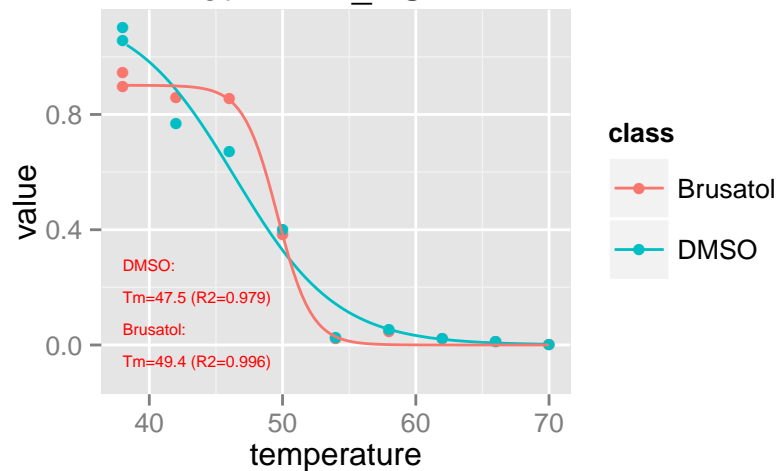

Prot: DDX17\_HUMAN

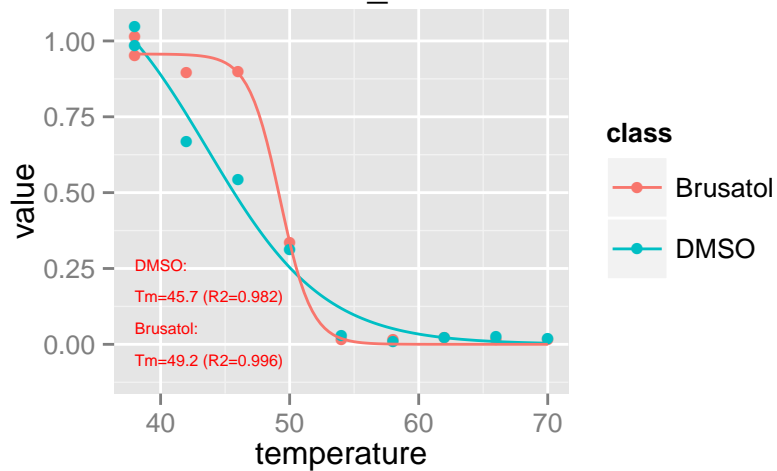

Prot: DDX20\_HUMAN

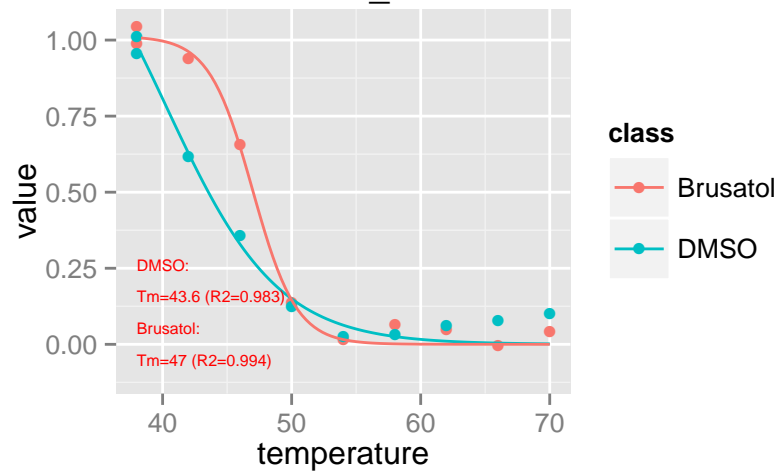

Prot: DDX21\_HUMAN

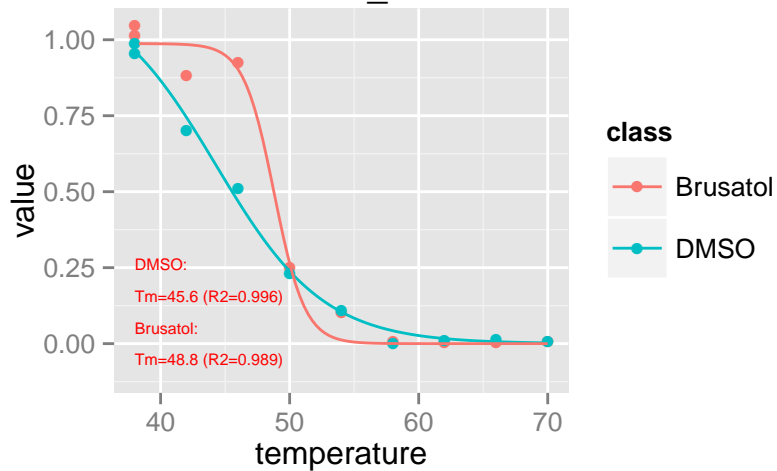

Prot: DDX23\_HUMAN

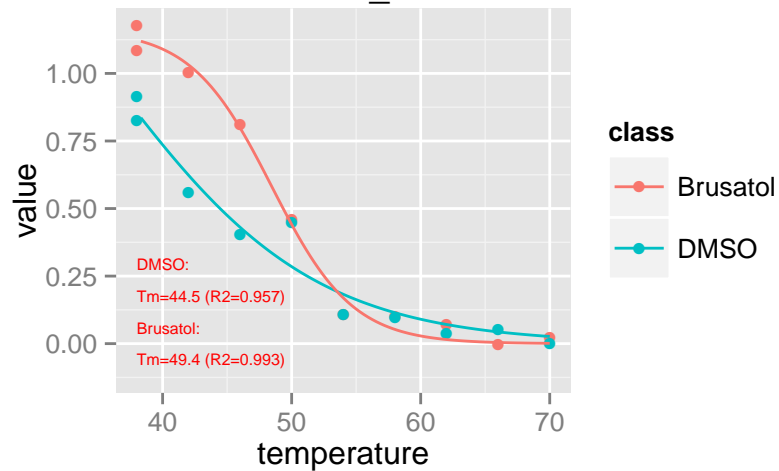

Prot: DDX3X\_HUMAN

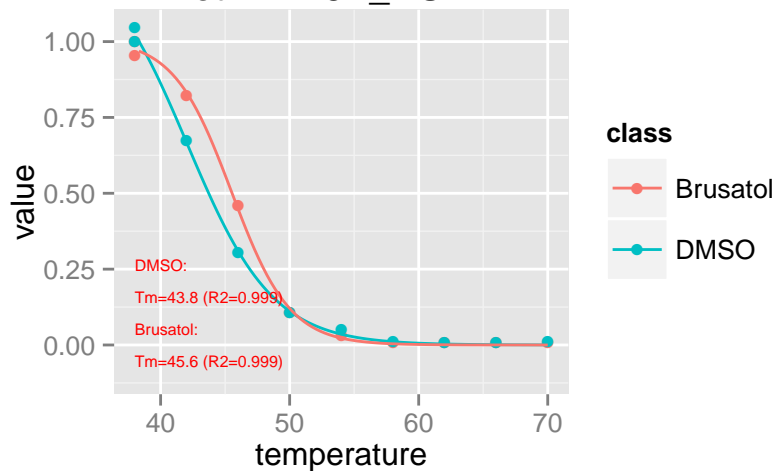

Prot: DDX42\_HUMAN

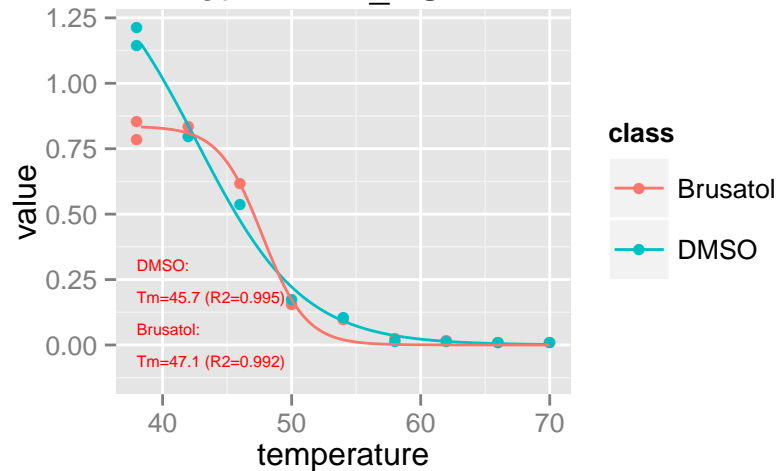

Prot: DDX46\_HUMAN

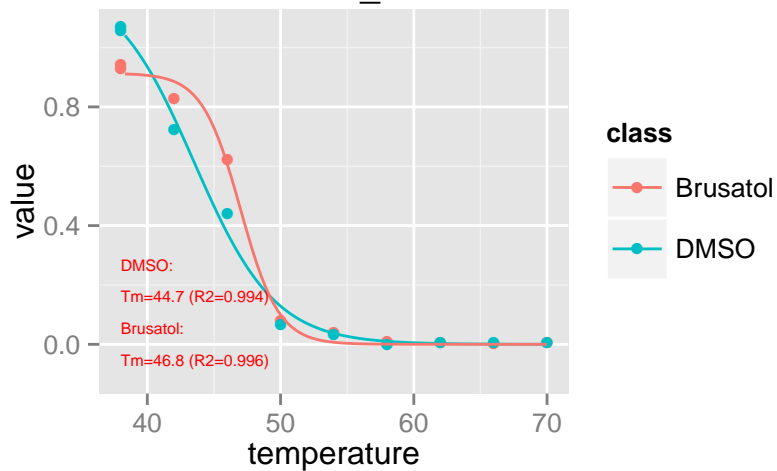

Prot: DDX49\_HUMAN

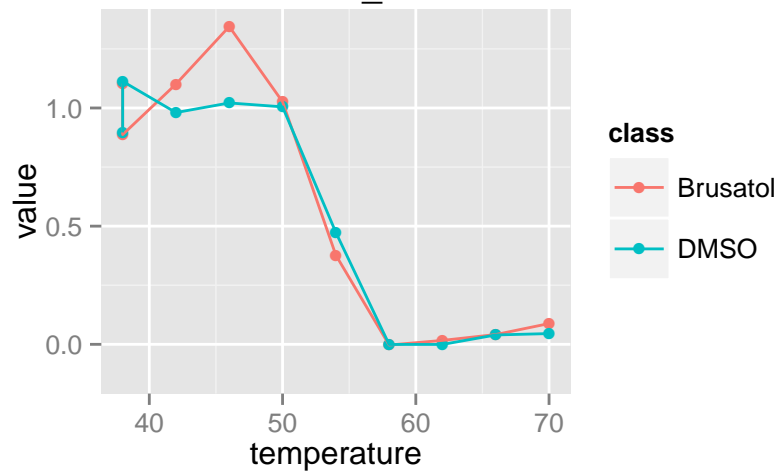



Prot: DDX5\_HUMAN

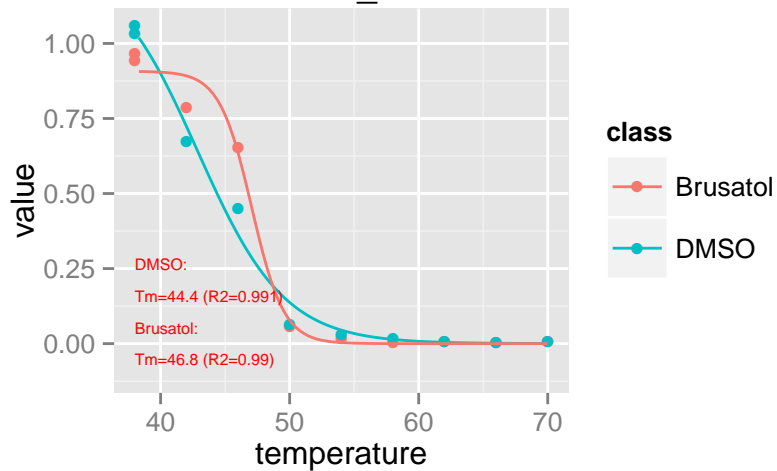

Prot: DDX56\_HUMAN

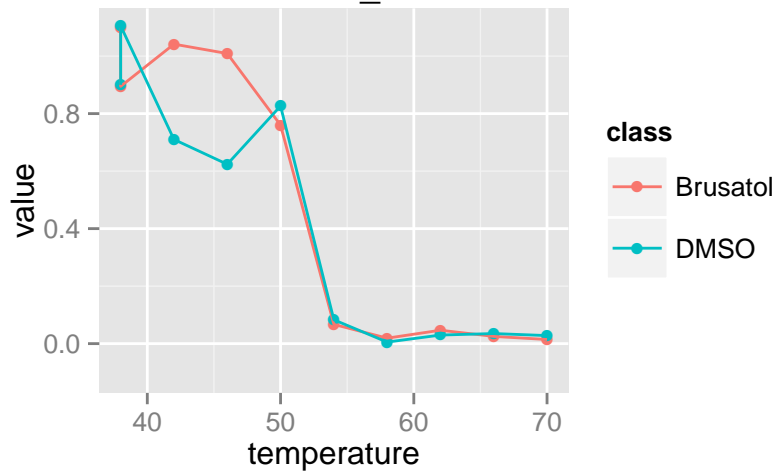

Prot: DDX6\_HUMAN

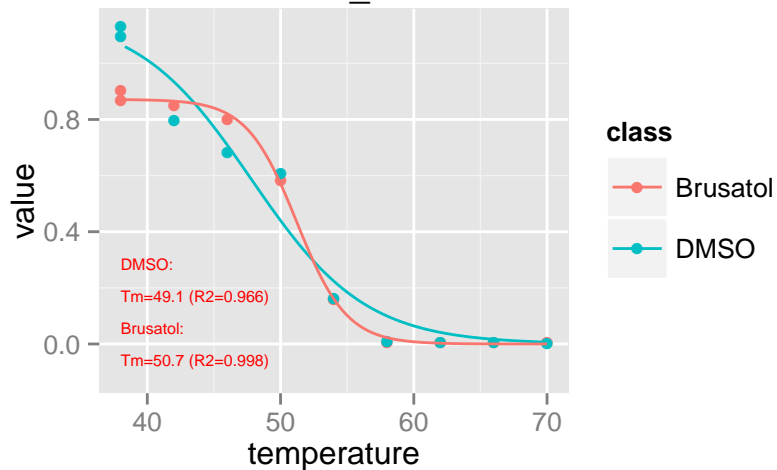

Prot: DECR\_HUMAN

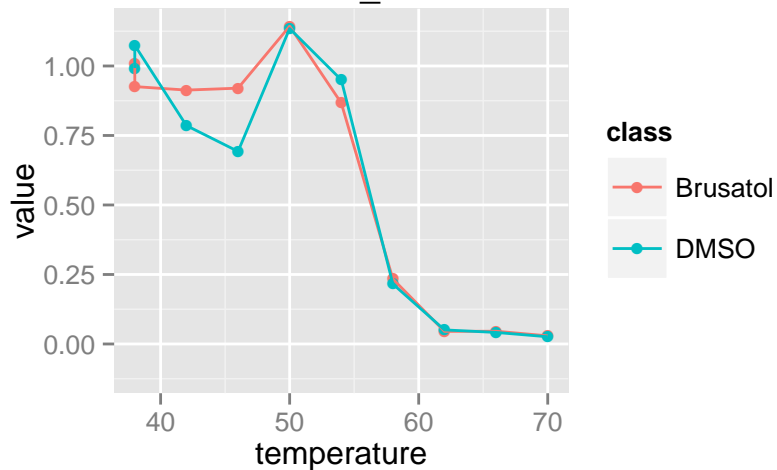

Prot: DEFM\_HUMAN

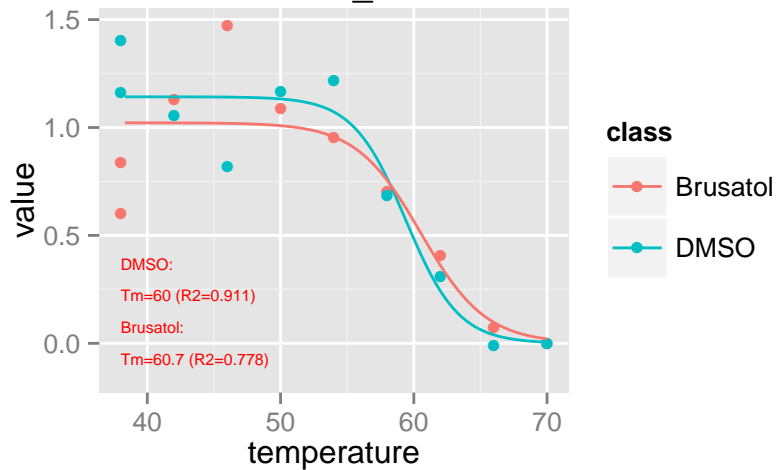

Prot: DEK\_HUMAN

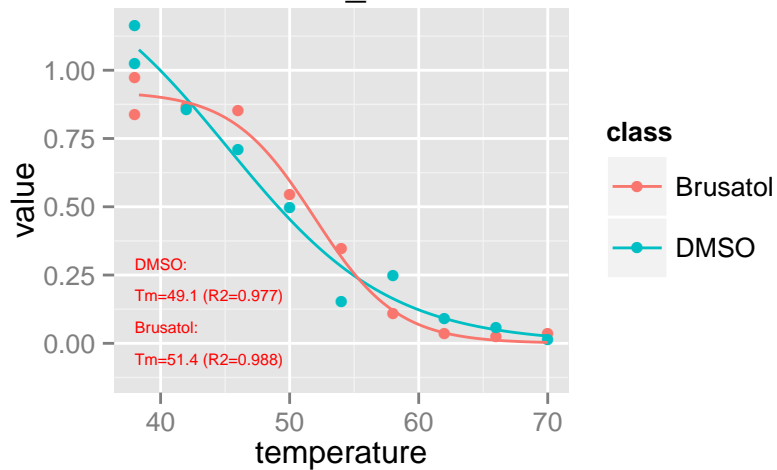

Prot: DEN4C\_HUMAN

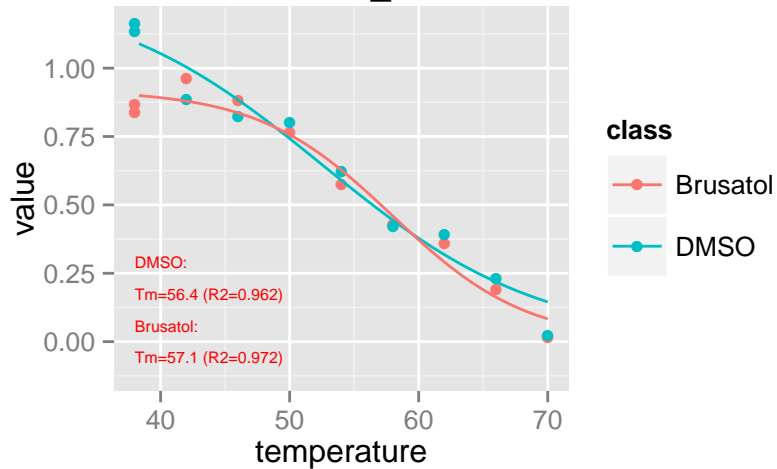

Prot: DENR\_HUMAN

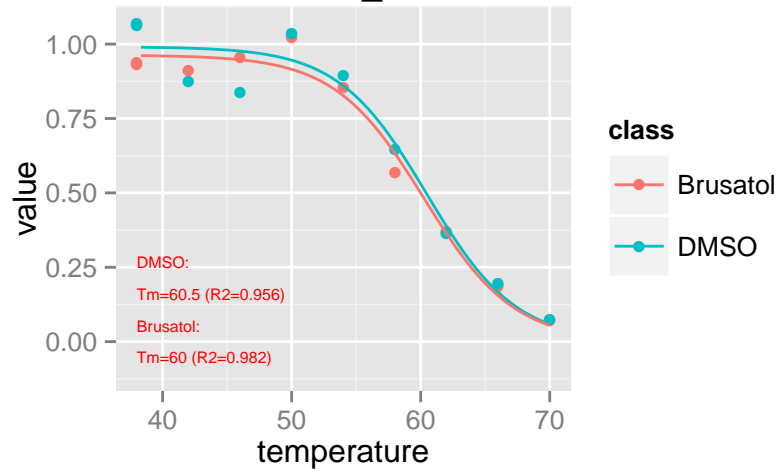

Prot: DEOC\_HUMAN

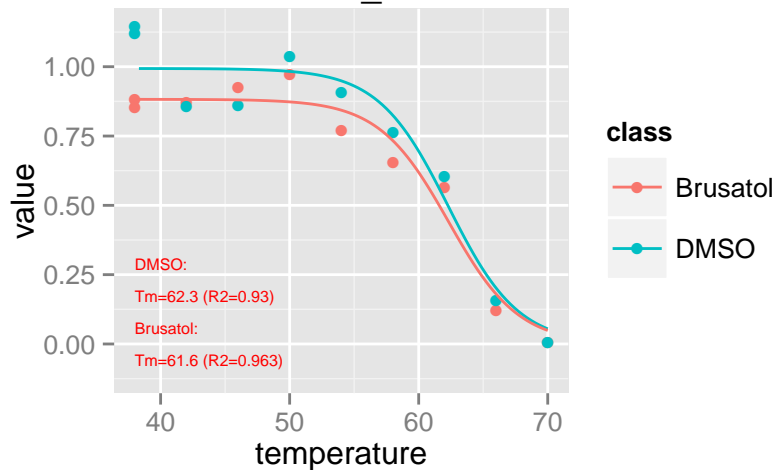

Prot: DESM\_HUMAN

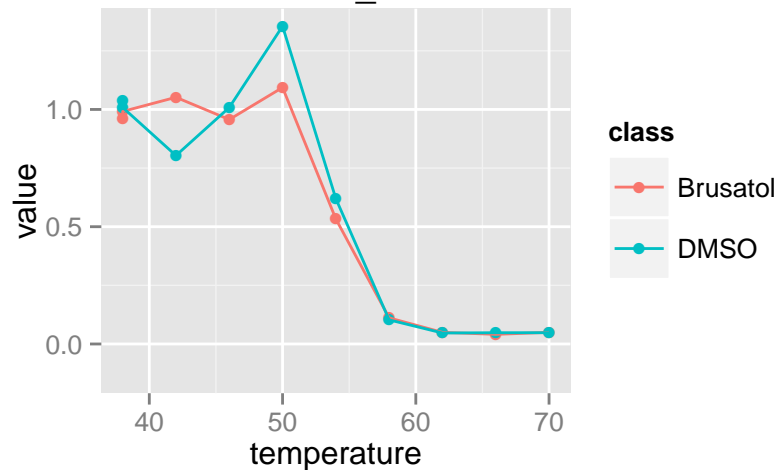

Prot: DESP\_HUMAN

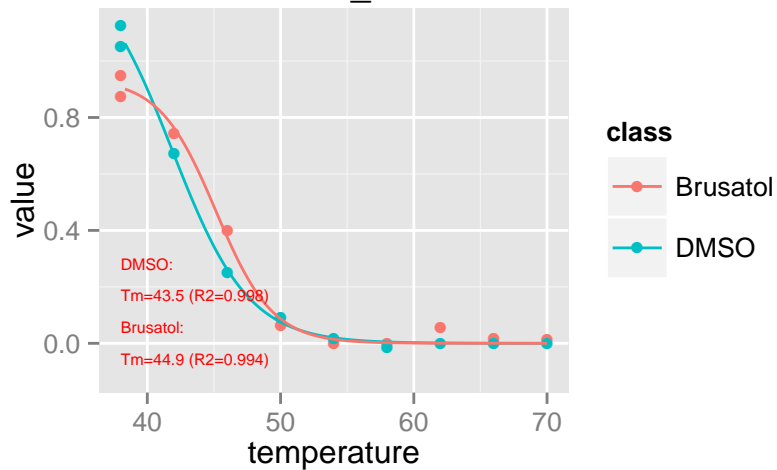

Prot: DEST\_HUMAN

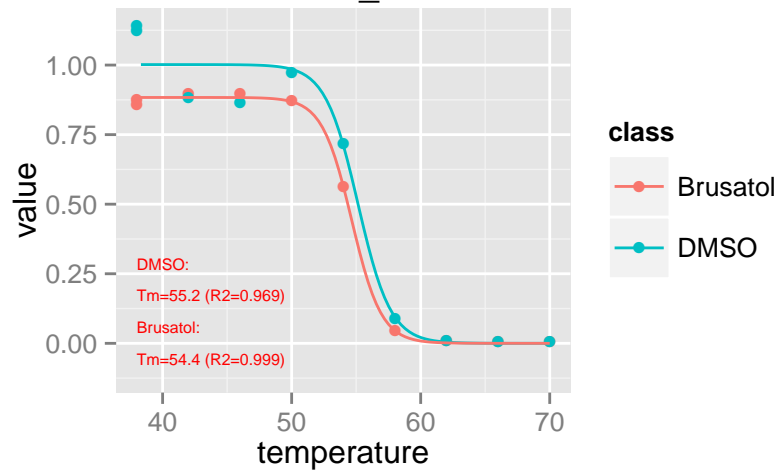

Prot: DFFA\_HUMAN

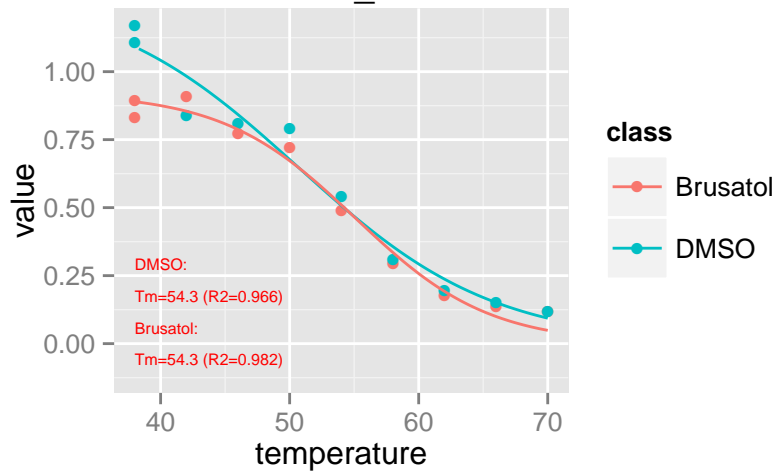

Prot: DFNA5\_HUMAN

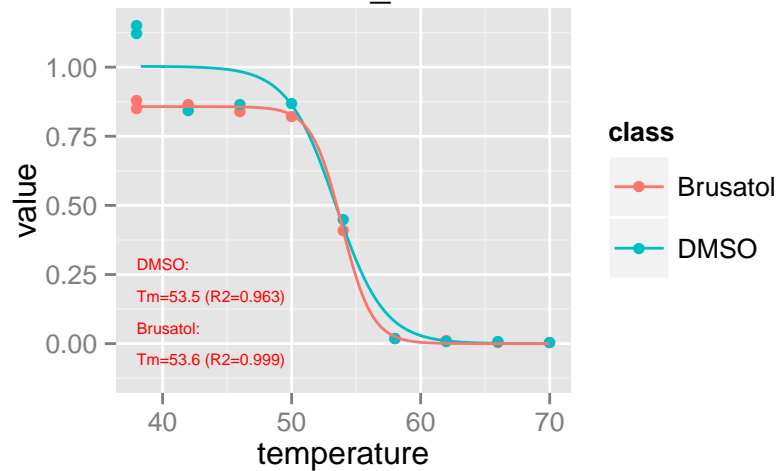

Prot: DHAK\_HUMAN

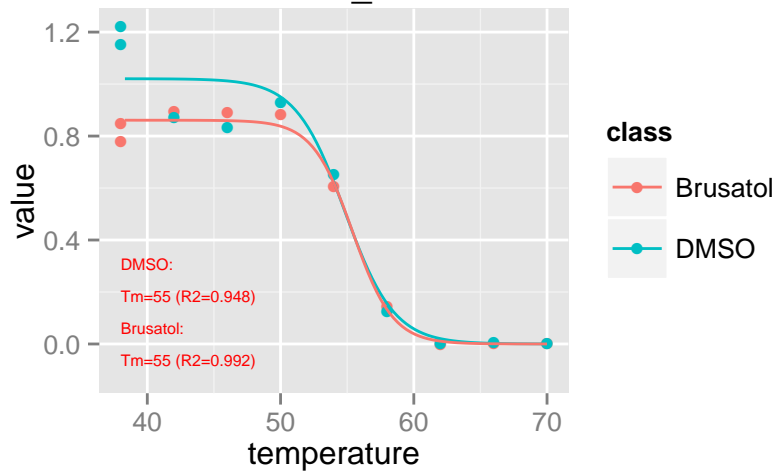

Prot: DHB11\_HUMAN

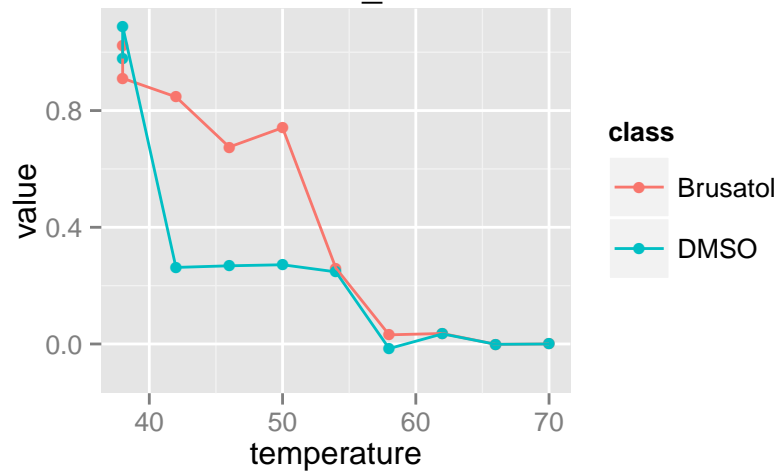

Prot: DHB4\_HUMAN

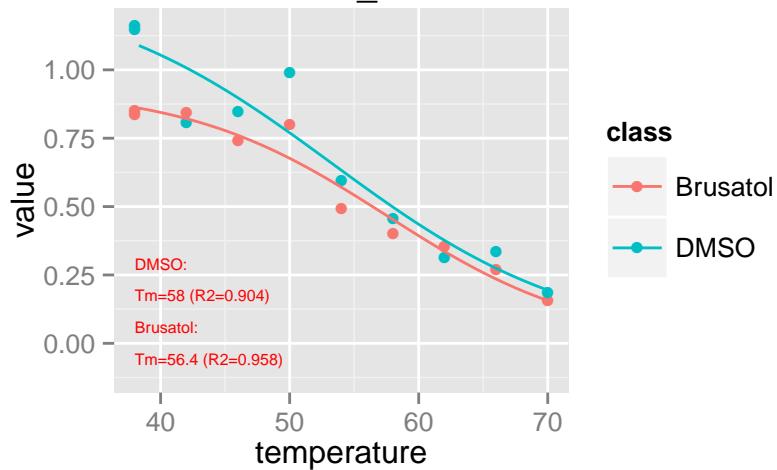

Prot: DHB8\_HUMAN

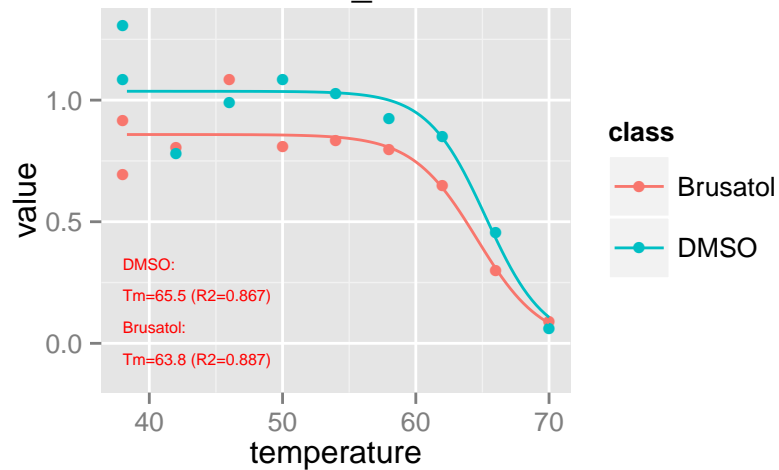

Prot: DHE3\_HUMAN

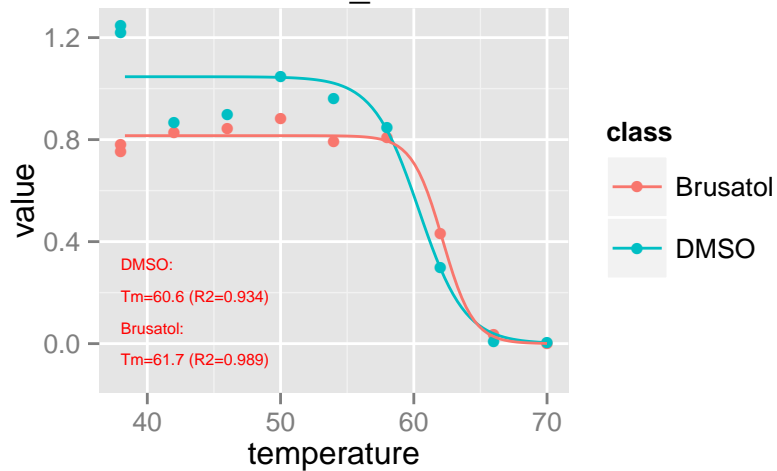

Prot: DHPR\_HUMAN

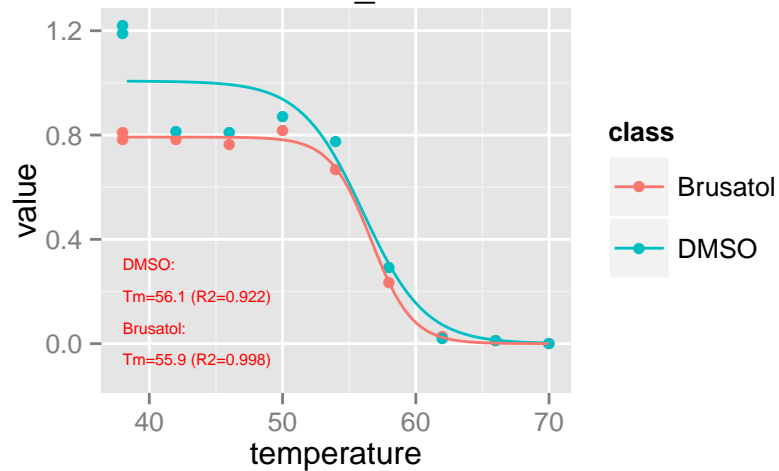

Prot: DHR11\_HUMAN

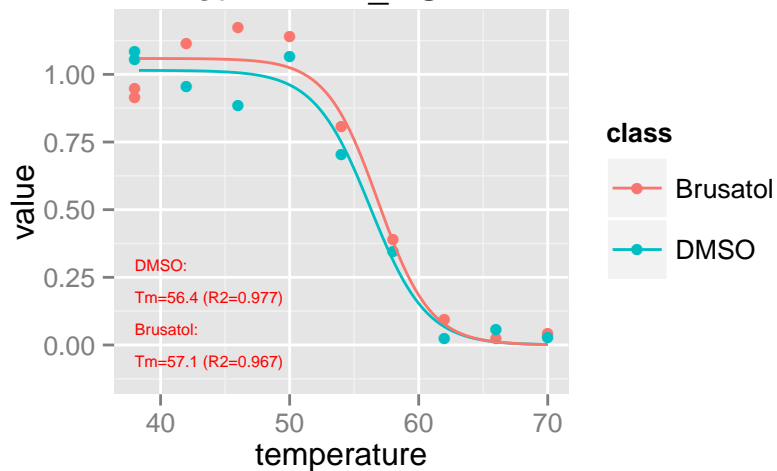

Prot: DHRS4\_HUMAN

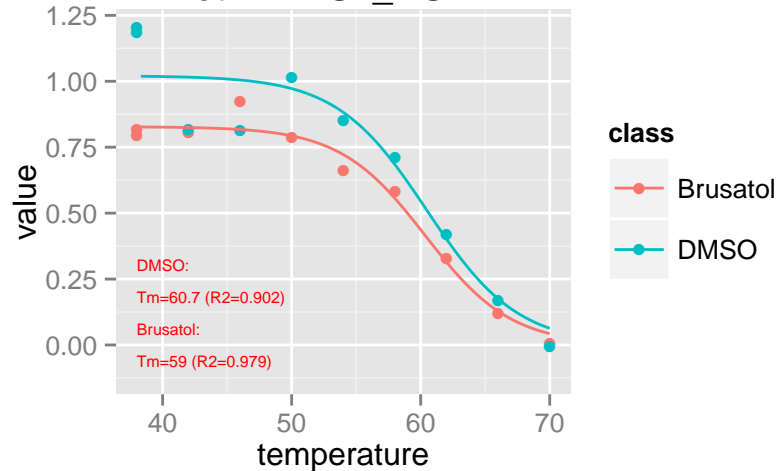

Prot: DHSA\_HUMAN

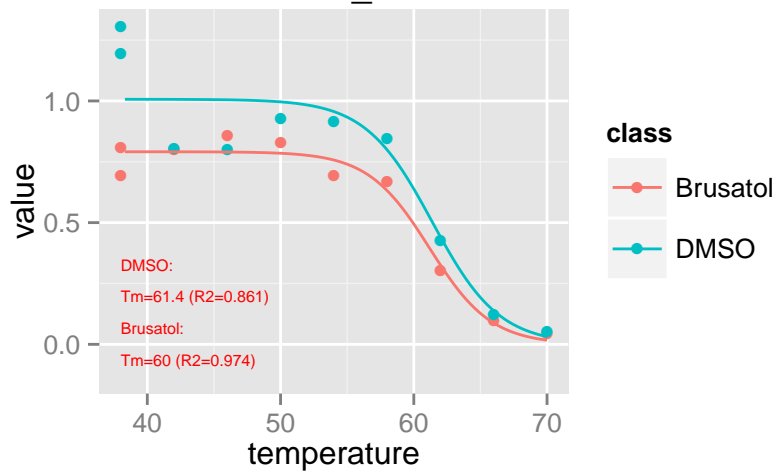

Prot: DHSO\_HUMAN

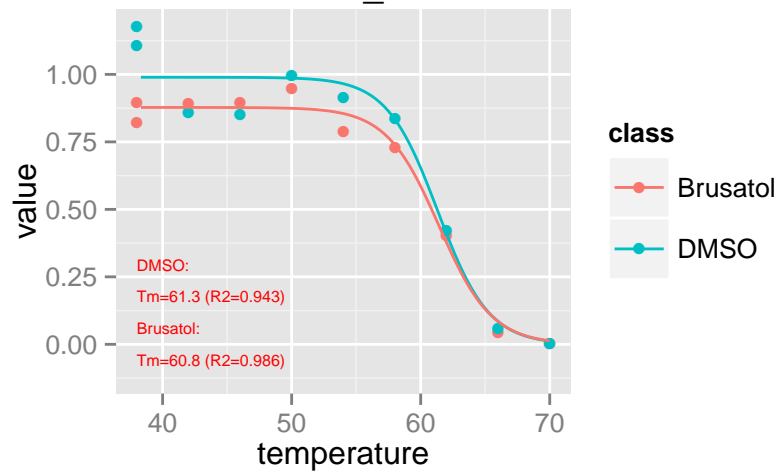

Prot: DHX15\_HUMAN

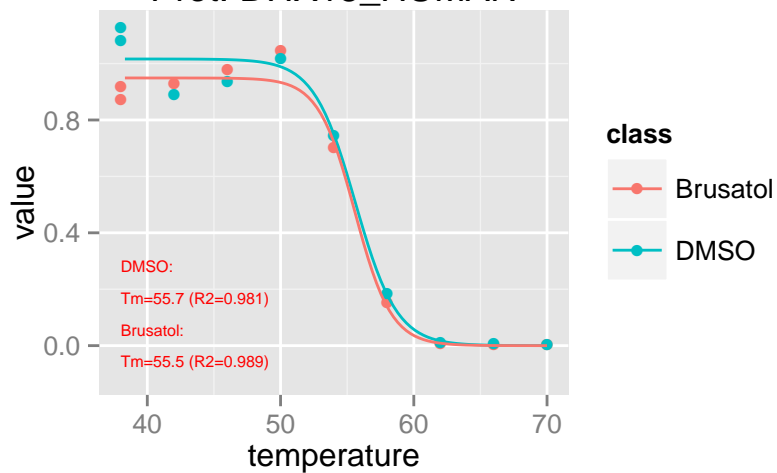

Prot: DHX16\_HUMAN

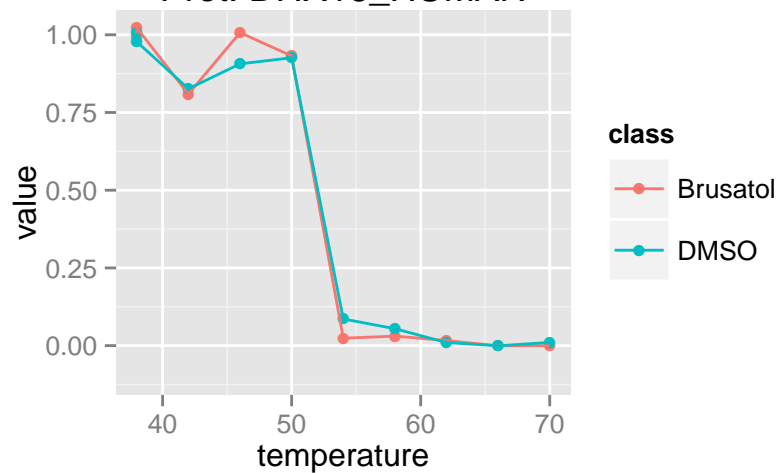

Prot: DHX29\_HUMAN

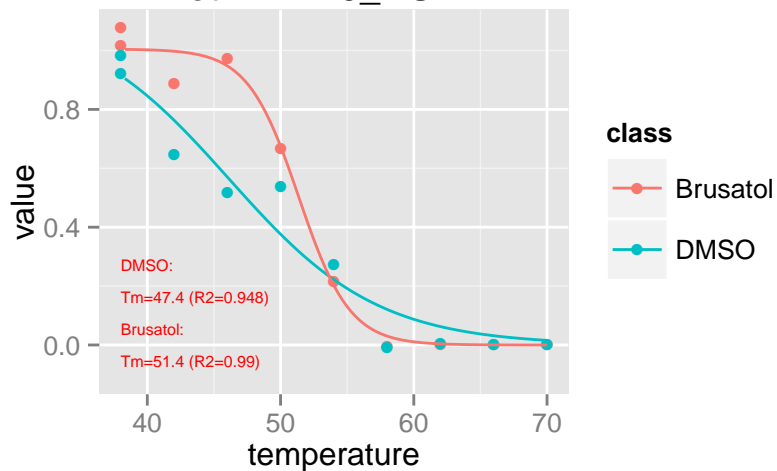

Prot: DHX36\_HUMAN

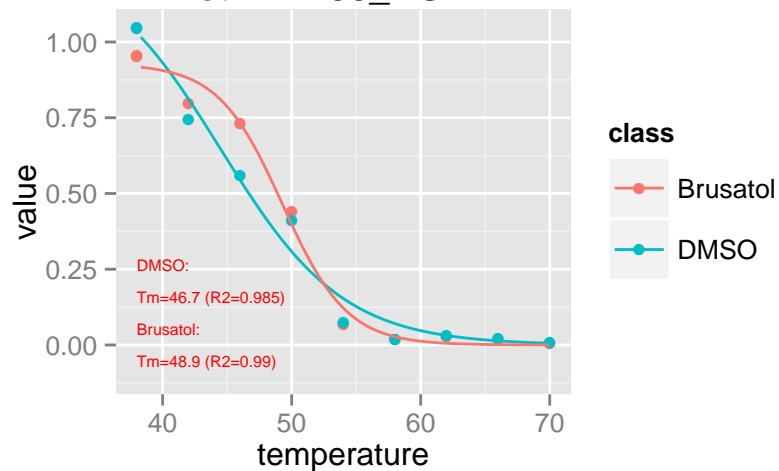

Prot: DHX57\_HUMAN

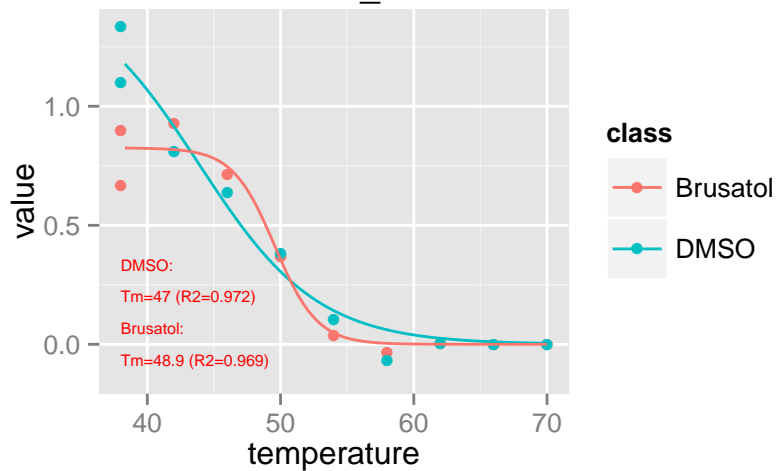

Prot: DHX9\_HUMAN

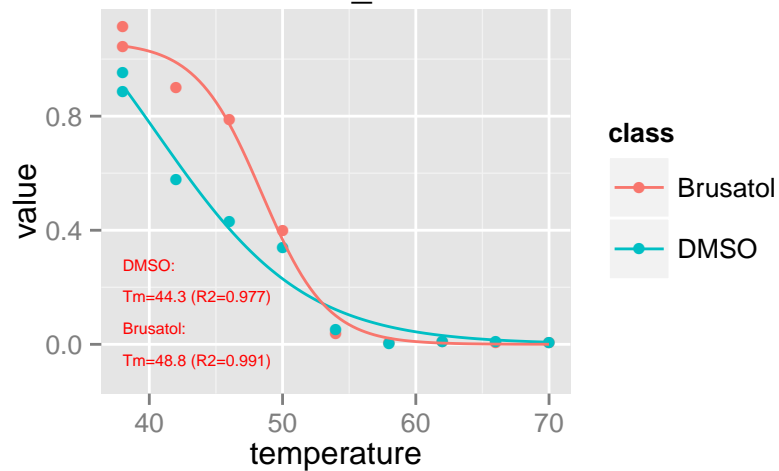

Prot: DHYS\_HUMAN

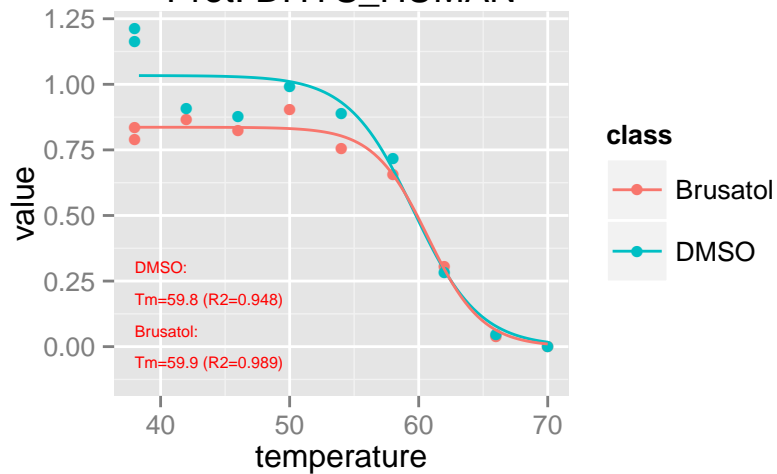

Prot: DI3L2\_HUMAN

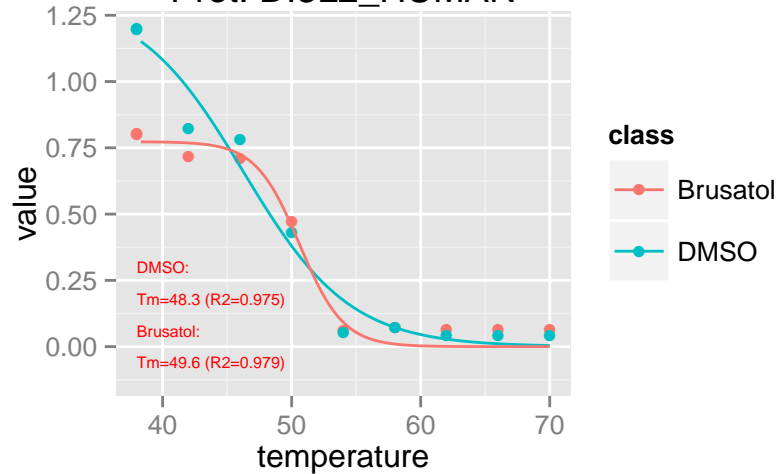

Prot: DIAP1\_HUMAN

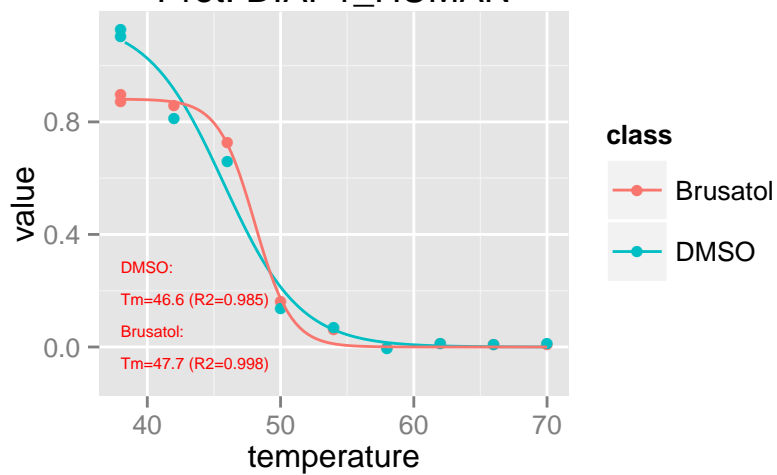

Prot: DIAP2\_HUMAN

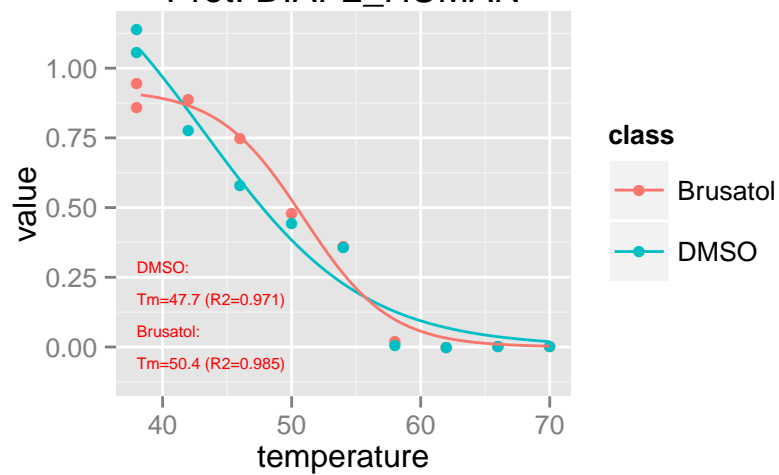

Prot: DIDO1\_HUMAN

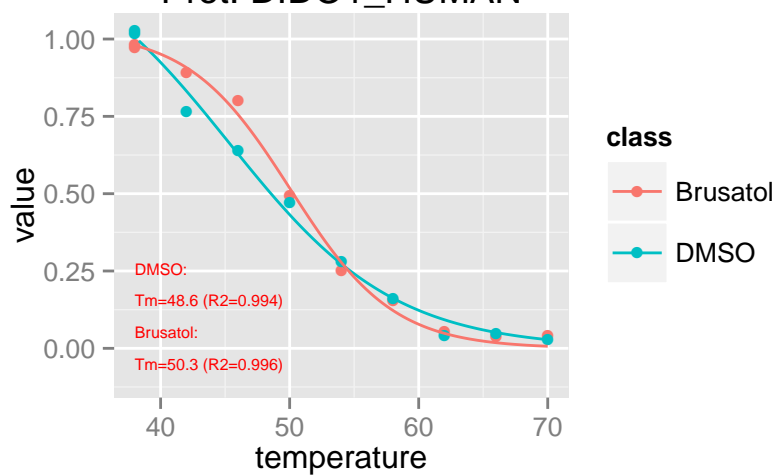

Prot: DIM1\_HUMAN

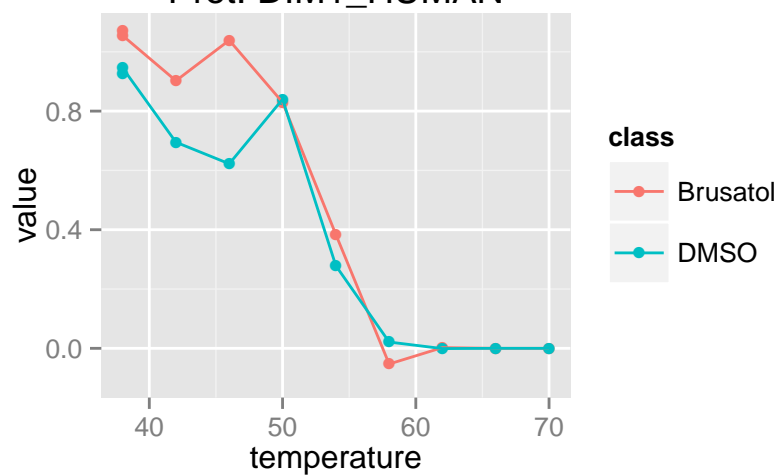

Prot: DIP2B\_HUMAN

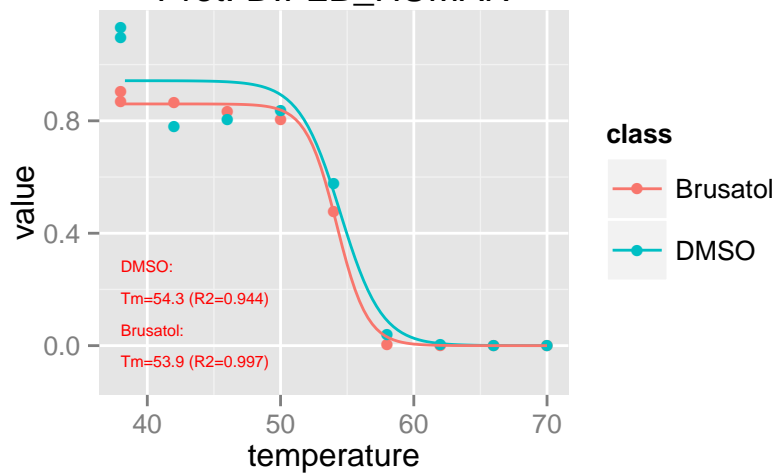

Prot: DJB11\_HUMAN

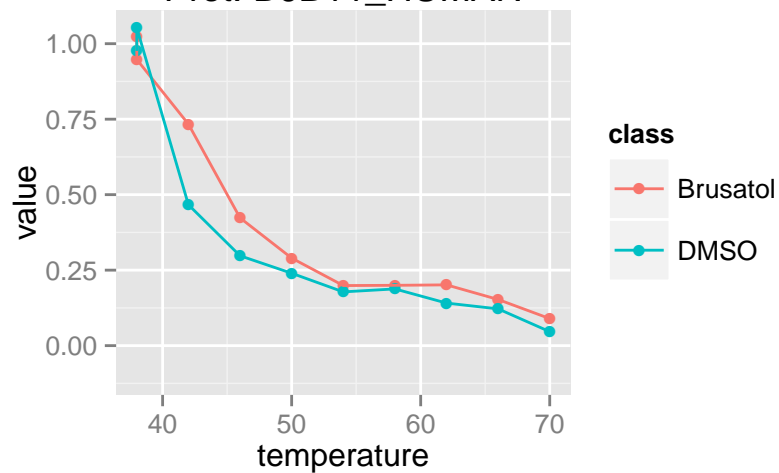

Prot: DJC10\_HUMAN

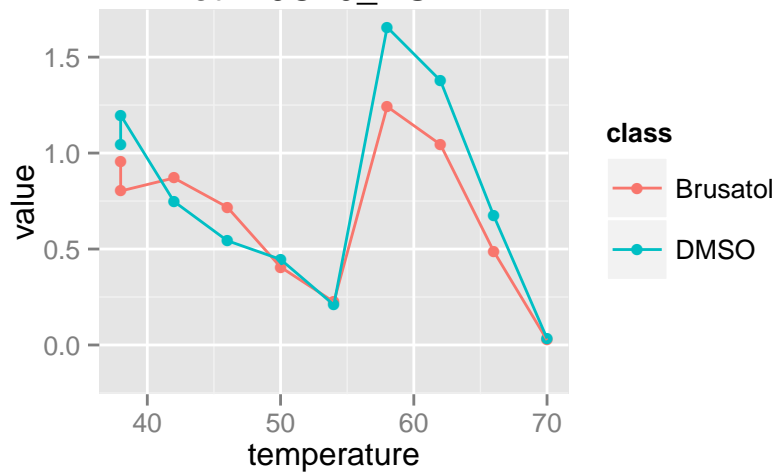

Prot: DJC12\_HUMAN

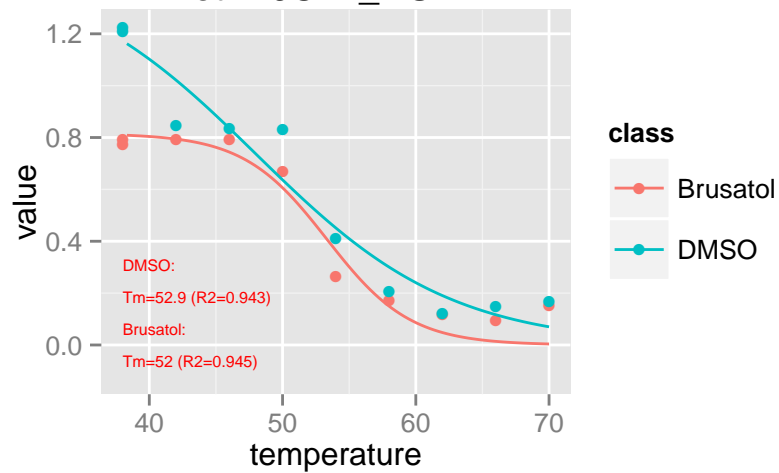

Prot: DJC13\_HUMAN

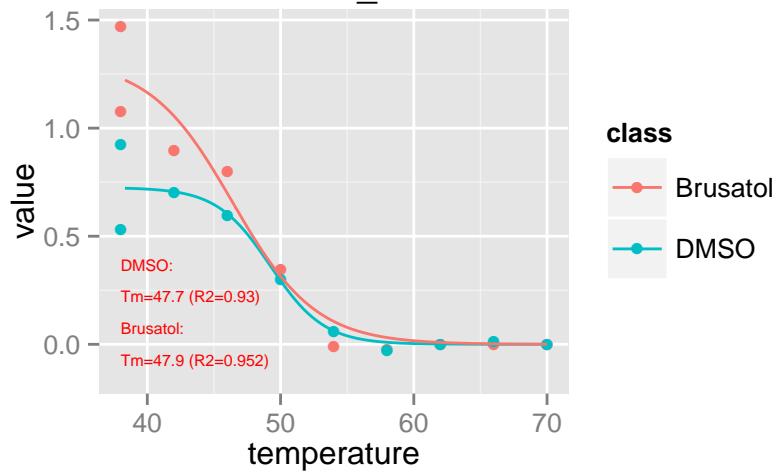

Prot: DJC17\_HUMAN

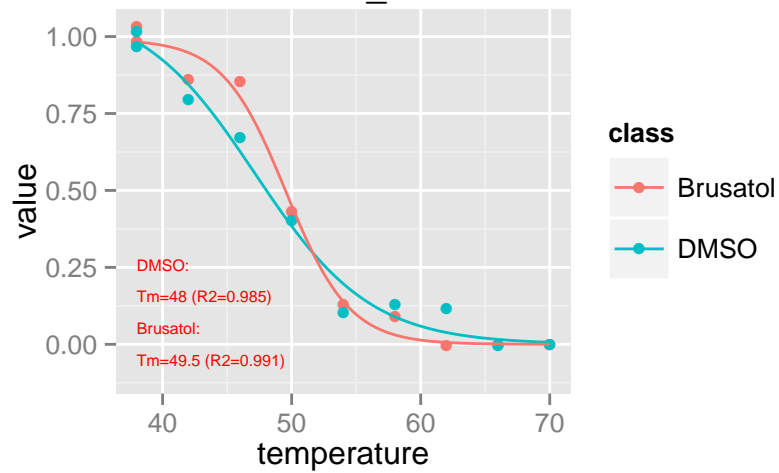

Prot: DKC1\_HUMAN

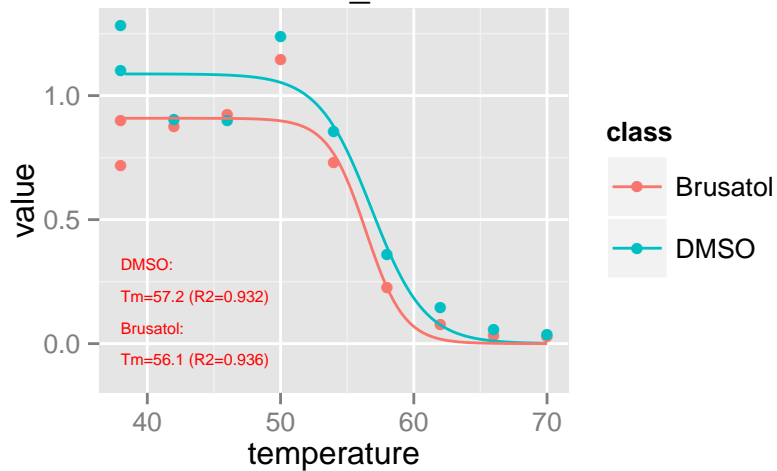

Prot: DLDH\_HUMAN

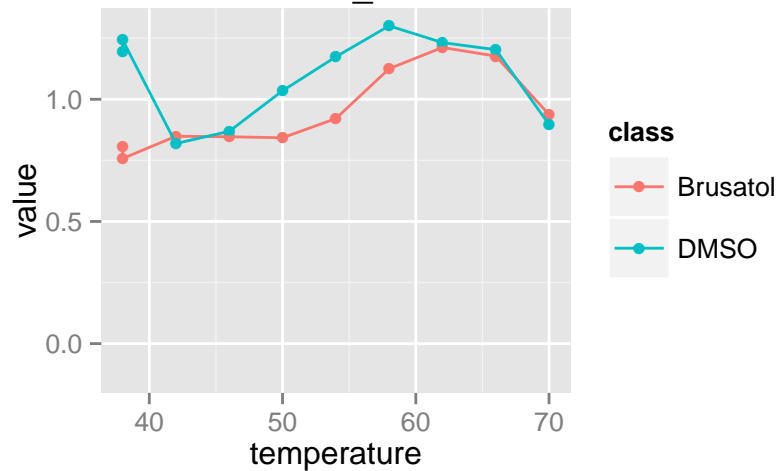

Prot: DLGP4\_HUMAN

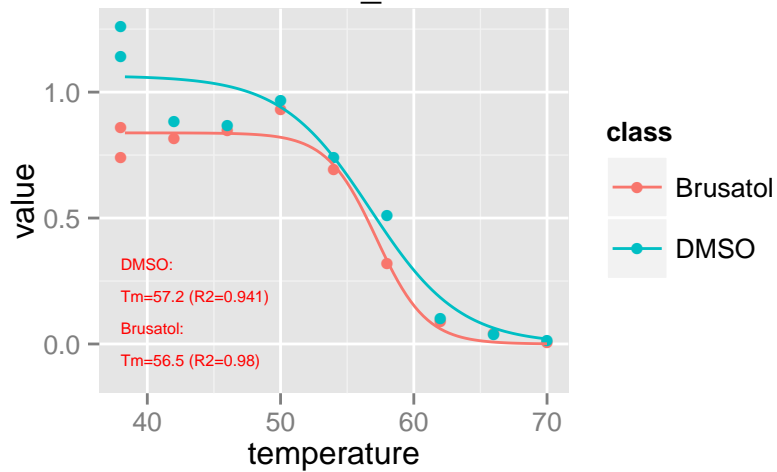

Prot: DLGP5\_HUMAN

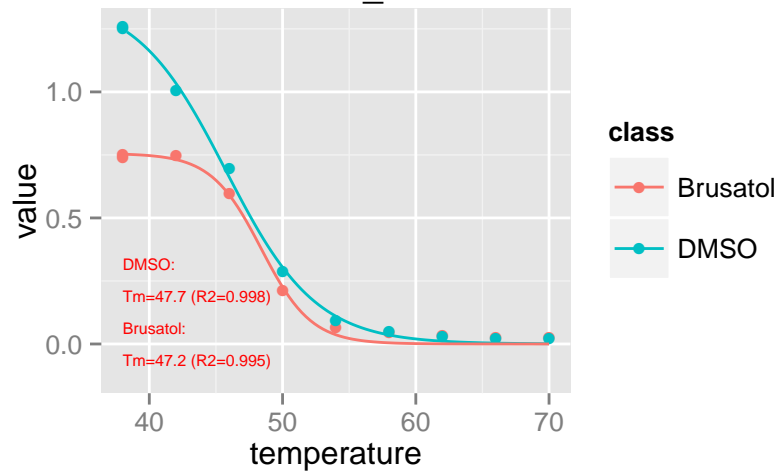

Prot: DLRB1\_HUMAN

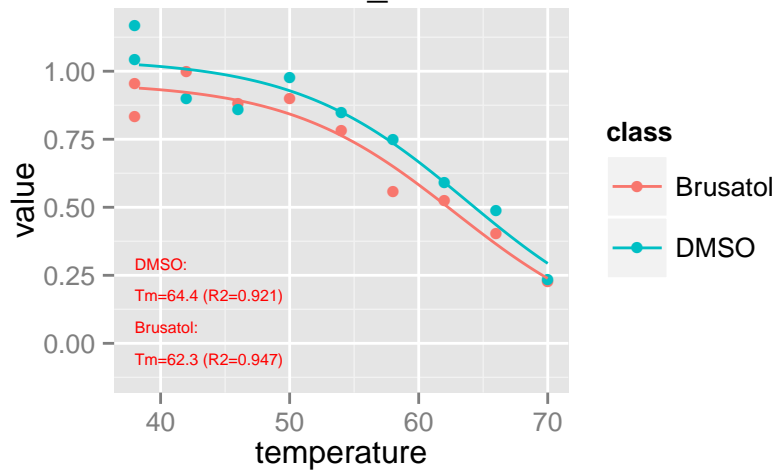

Prot: DNJA1\_HUMAN

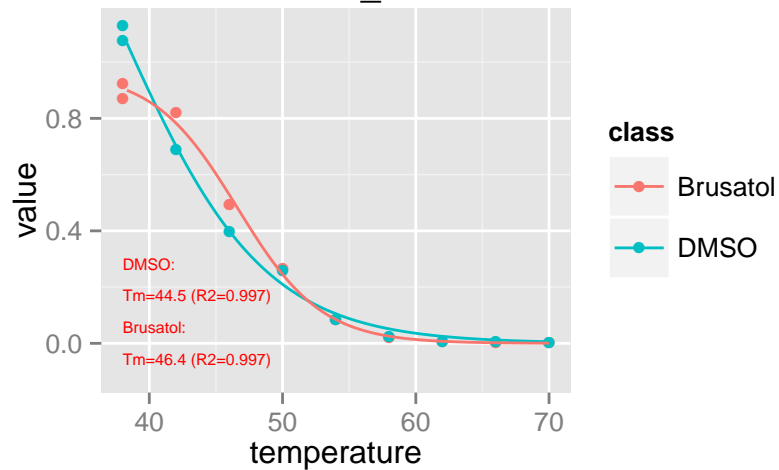



Prot: DNJA2\_HUMAN

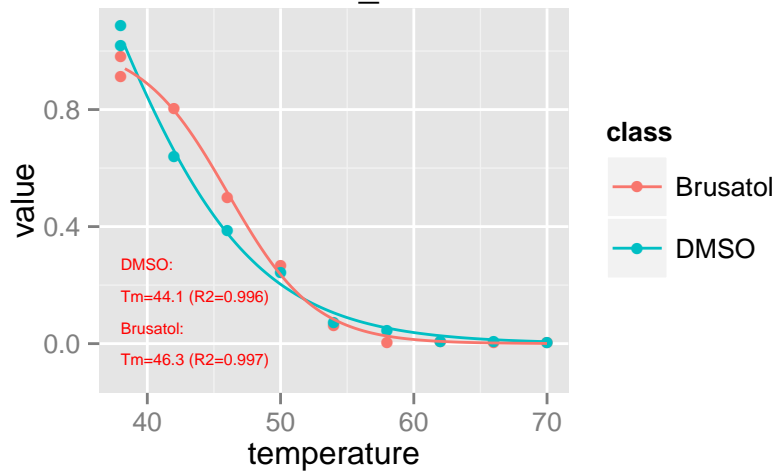

Prot: DNJB1\_HUMAN

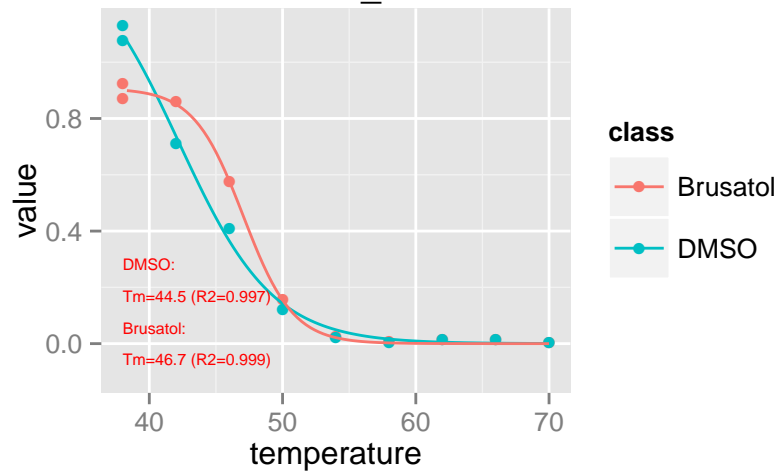

Prot: DNJB4\_HUMAN

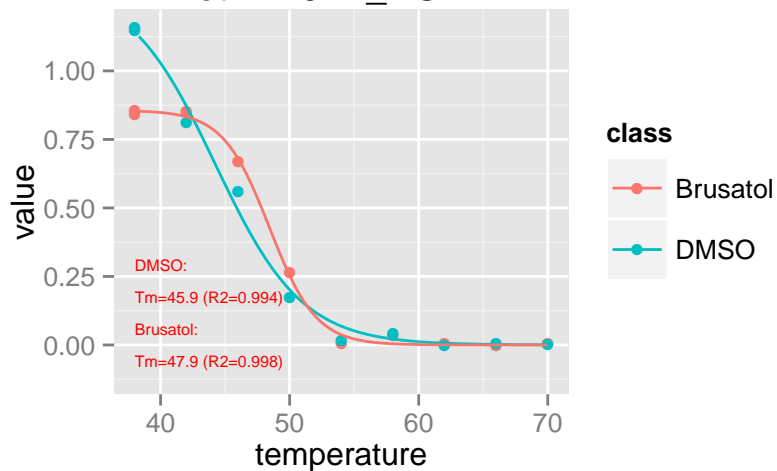

Prot: DNJC2\_HUMAN

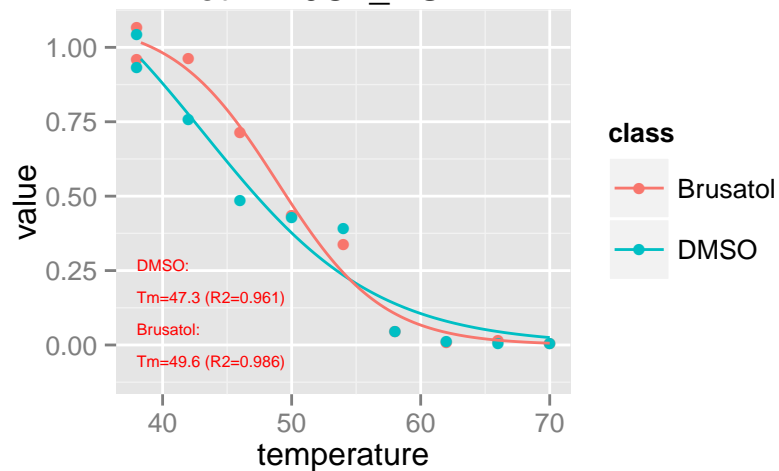

Prot: DNJC3\_HUMAN

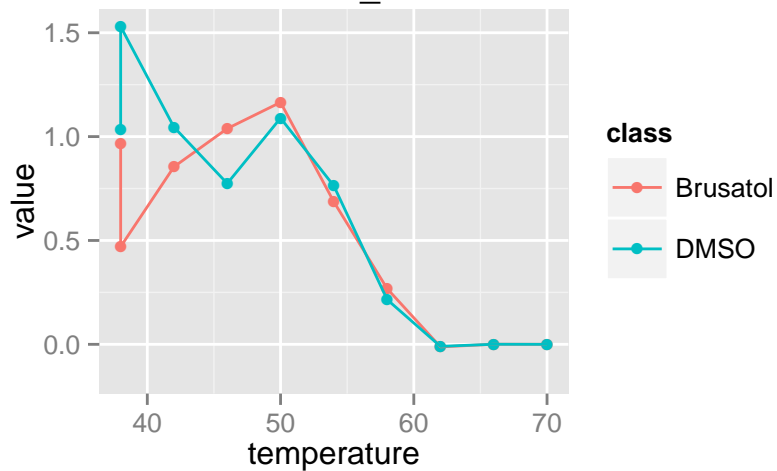

Prot: DNJC7\_HUMAN

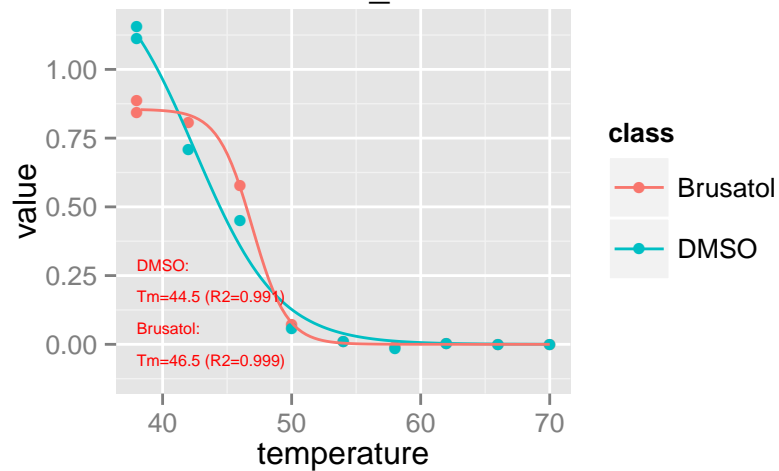

Prot: DNJC8\_HUMAN

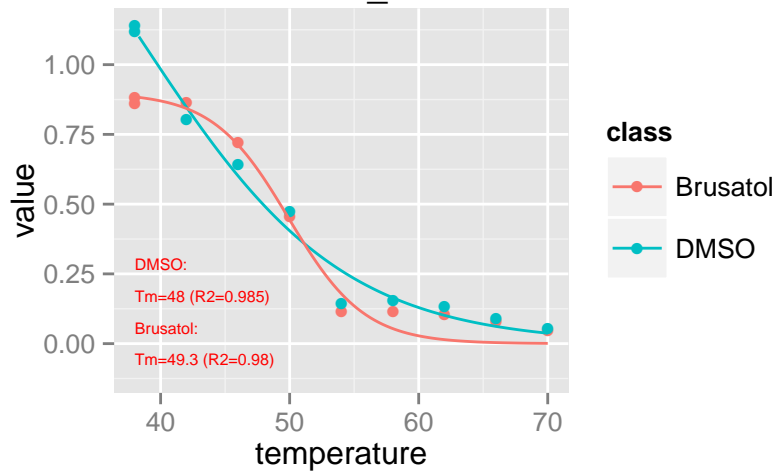

Prot: DNJC9\_HUMAN

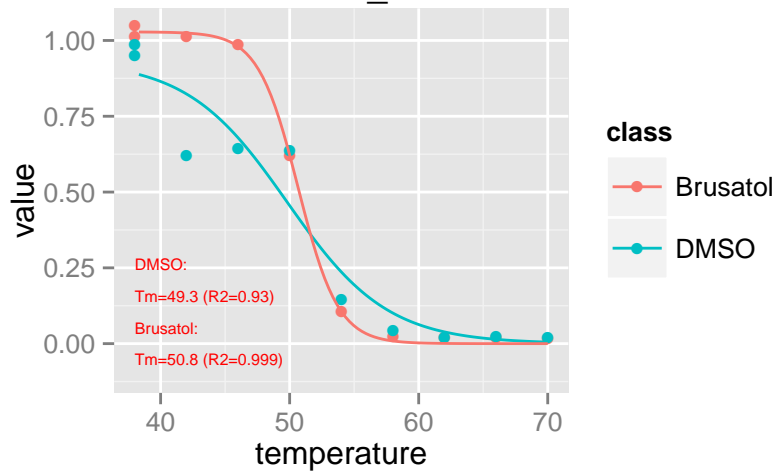

Prot: DNL11\_HUMAN

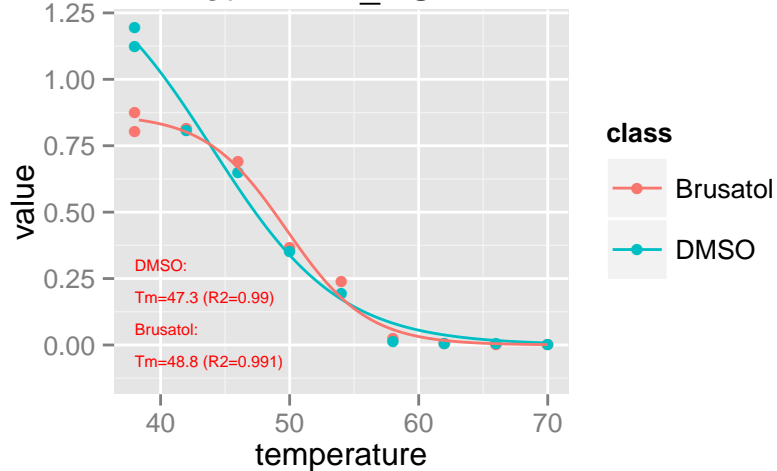

Prot: DNM1L\_HUMAN

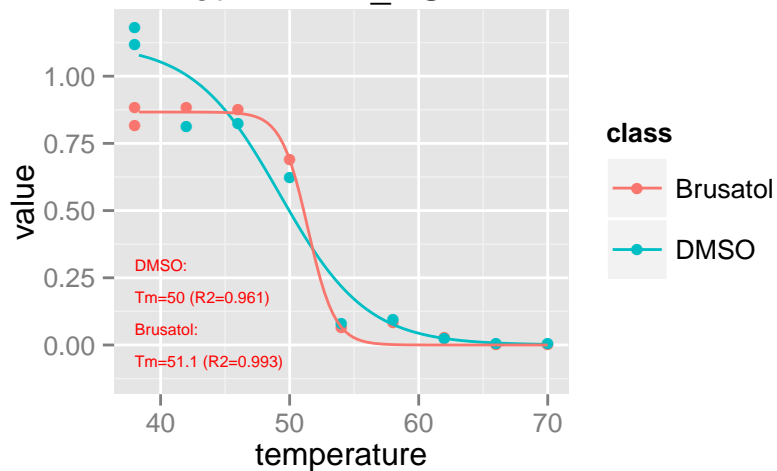

Prot: DNMBP\_HUMAN

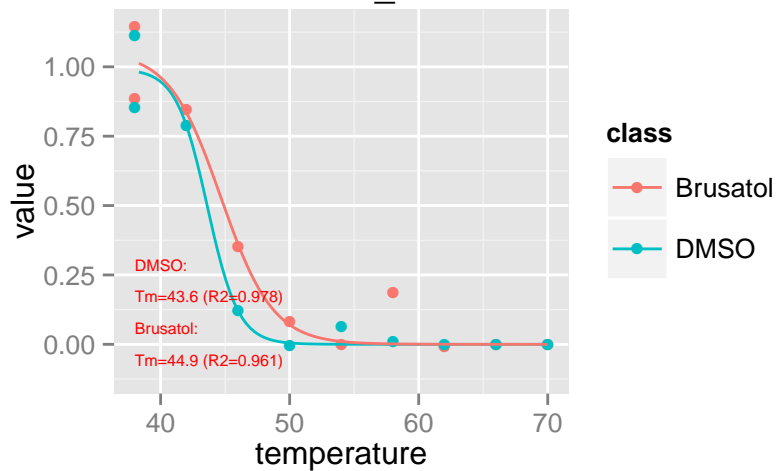

Prot: DNMT1\_HUMAN

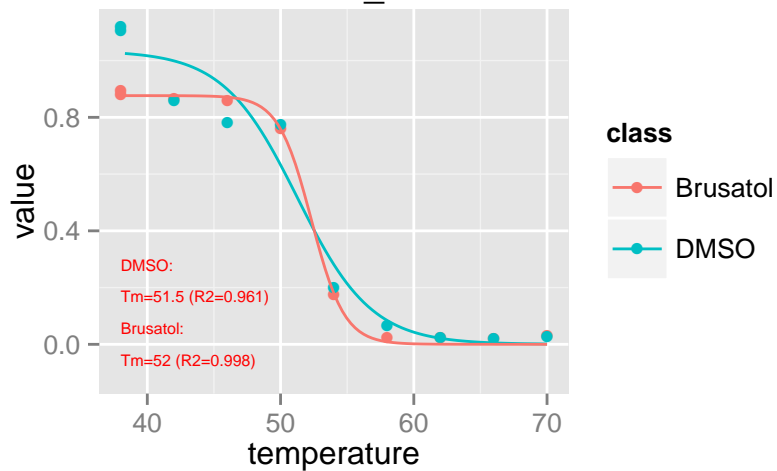

Prot: DNPEP\_HUMAN

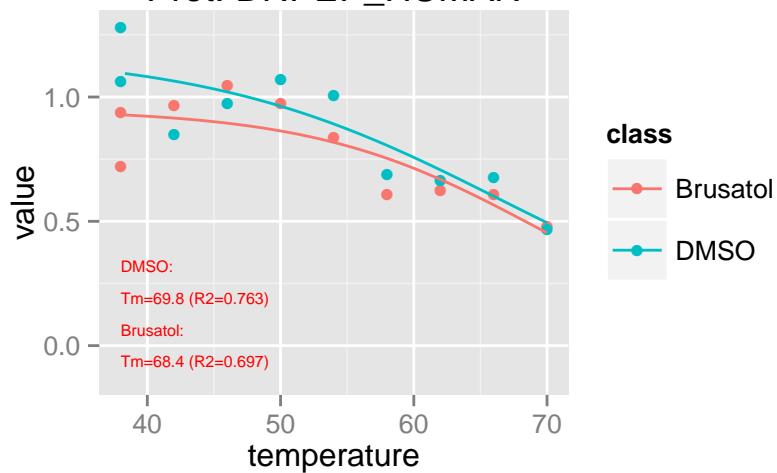

Prot: DNS2A\_HUMAN

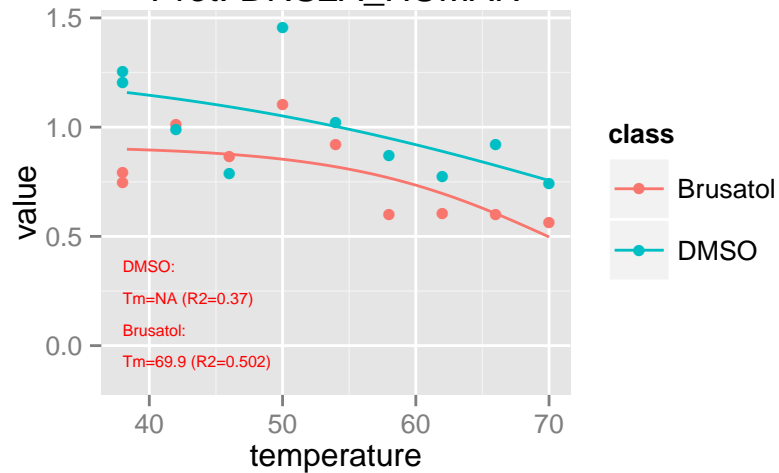

Prot: DOC10\_HUMAN

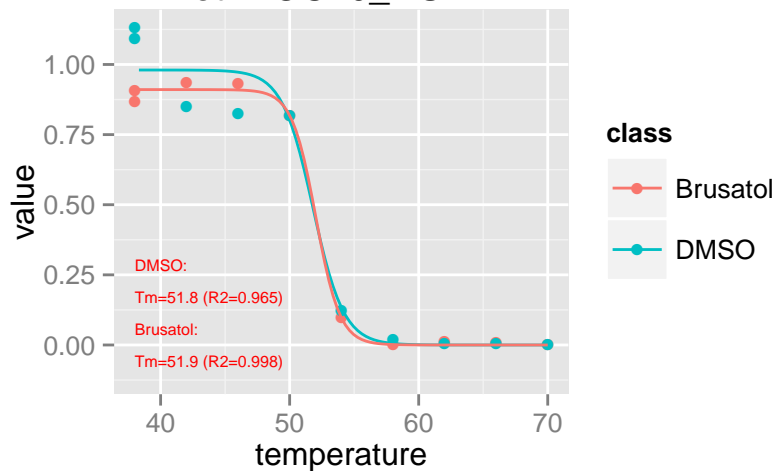

Prot: DOCK5\_HUMAN

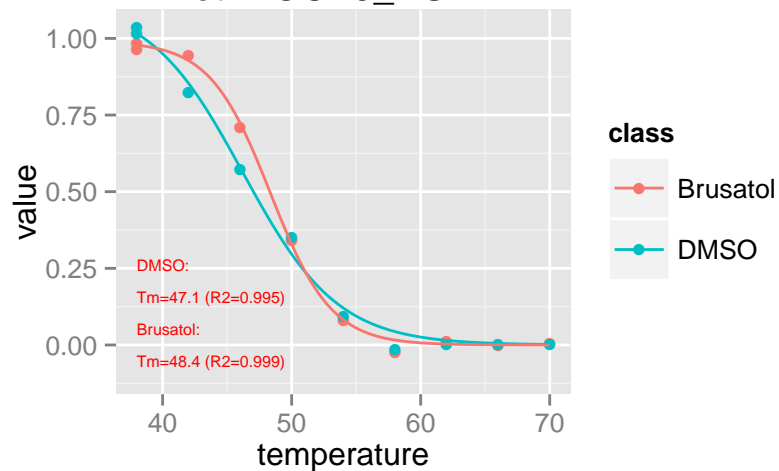

Prot: DOHH\_HUMAN

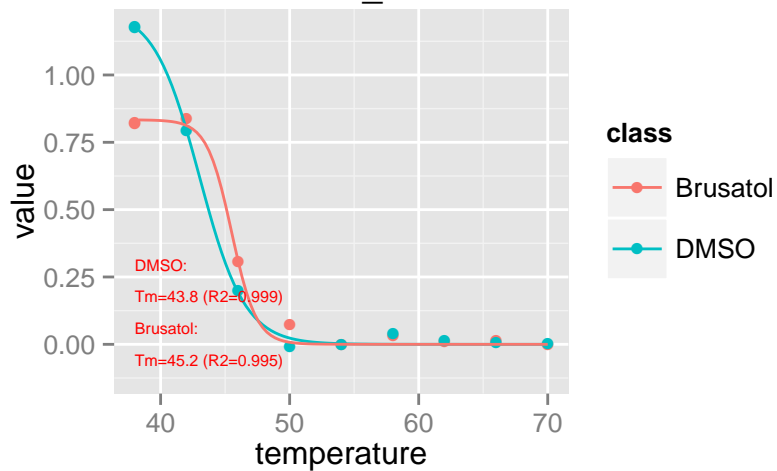

Prot: DOPD\_HUMAN

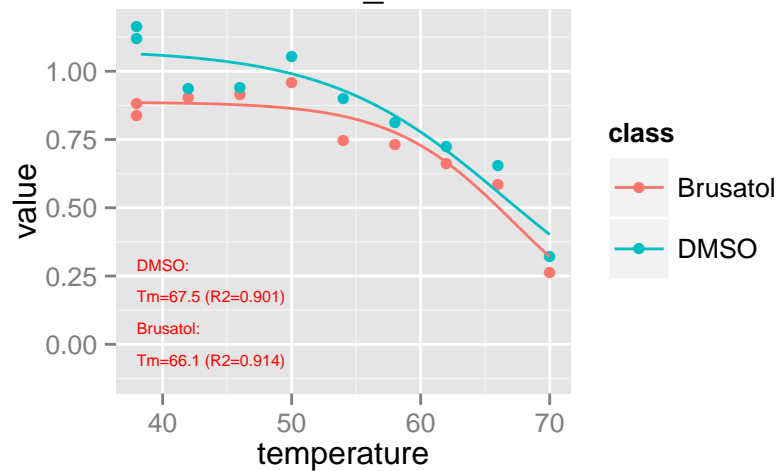

Prot: DP13A\_HUMAN

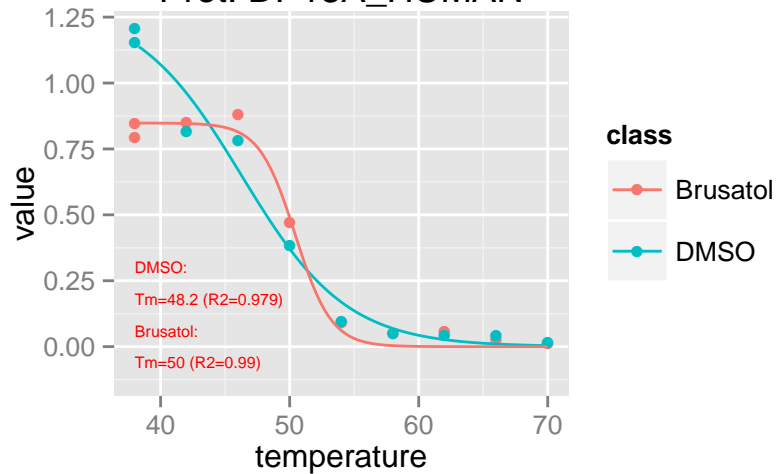

Prot: DP13B\_HUMAN

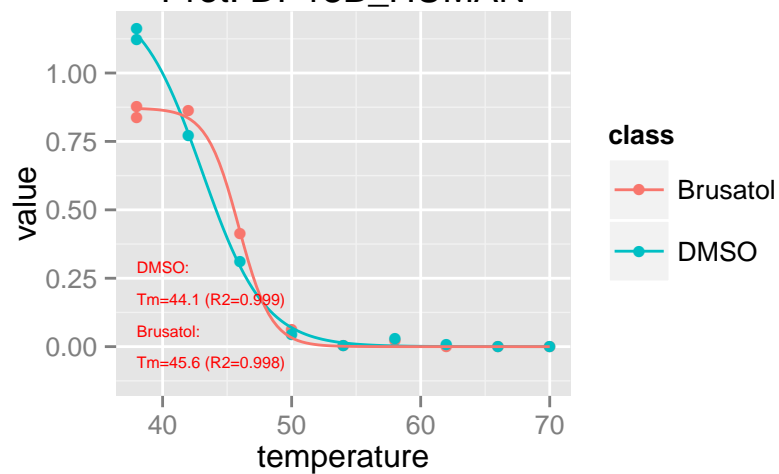

Prot: DPH1\_HUMAN

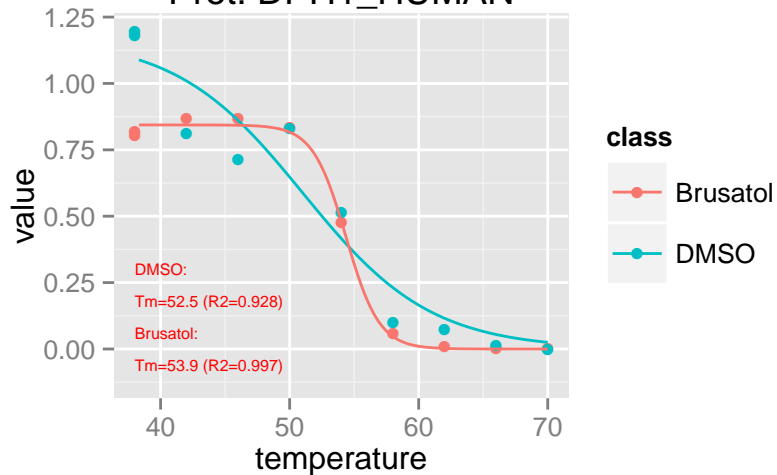

Prot: DPH2\_HUMAN

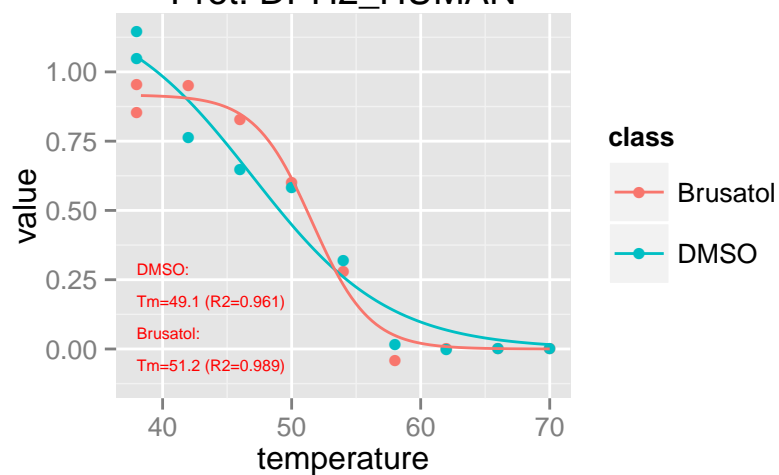

Prot: DPH5\_HUMAN

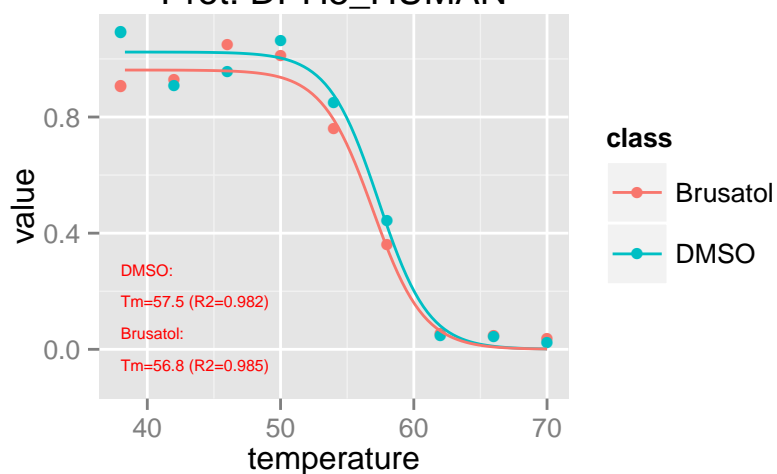

Prot: DPOA2\_HUMAN

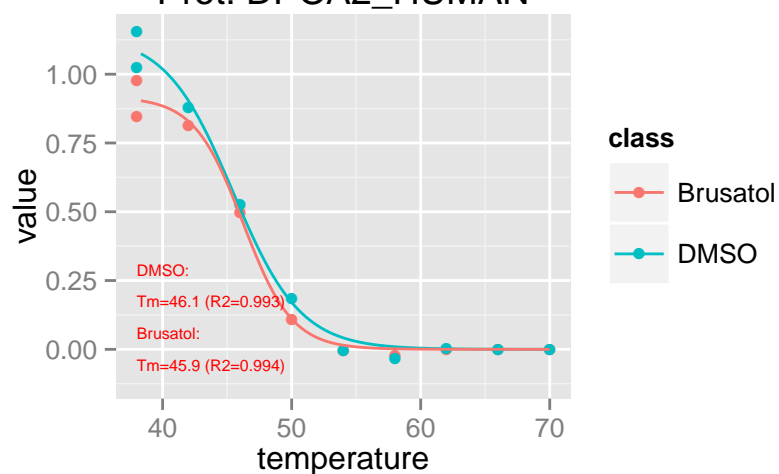

Prot: DPOD1\_HUMAN

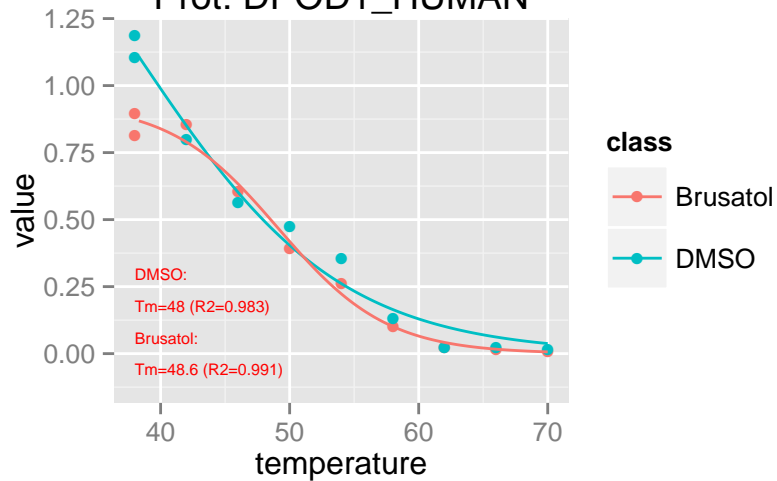

Prot: DPOD2\_HUMAN

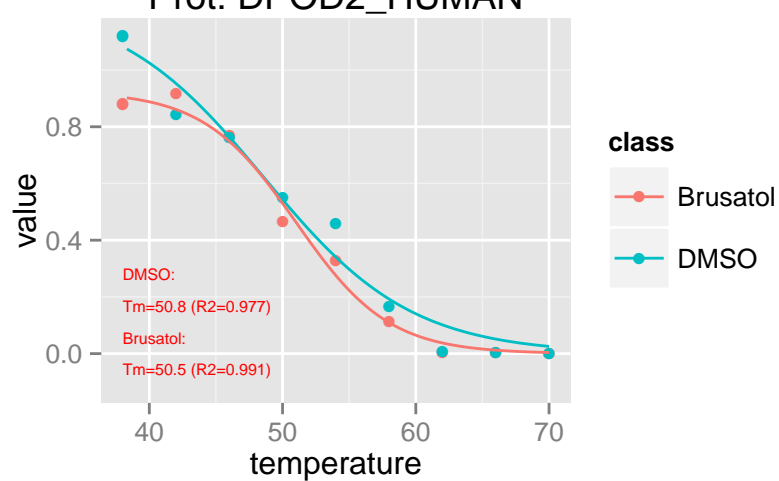

Prot: DPOD3\_HUMAN

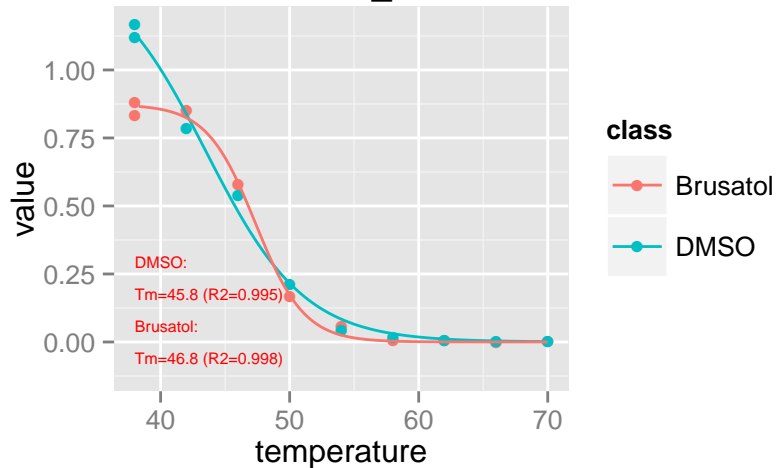

Prot: DPOE3\_HUMAN

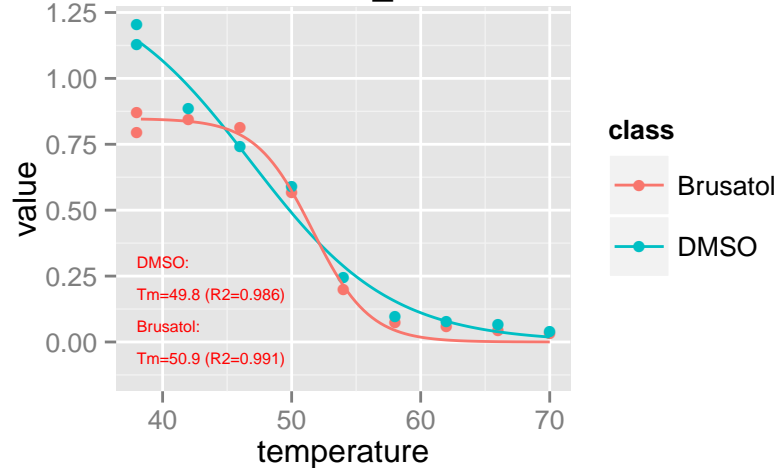

Prot: DPOE4\_HUMAN

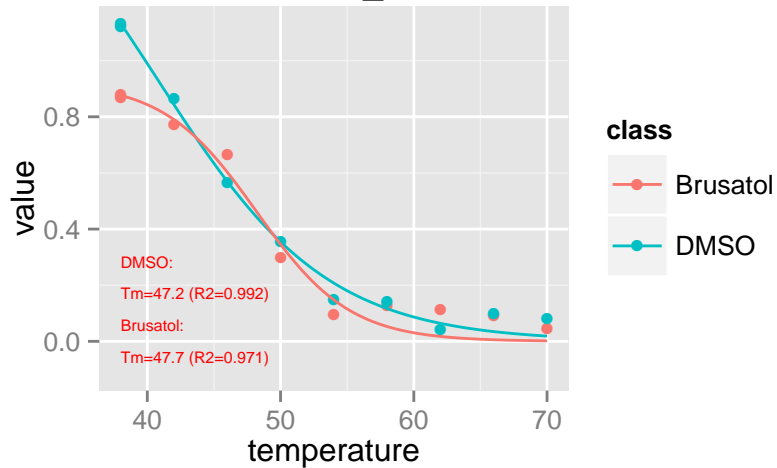

Prot: DPOLA\_HUMAN

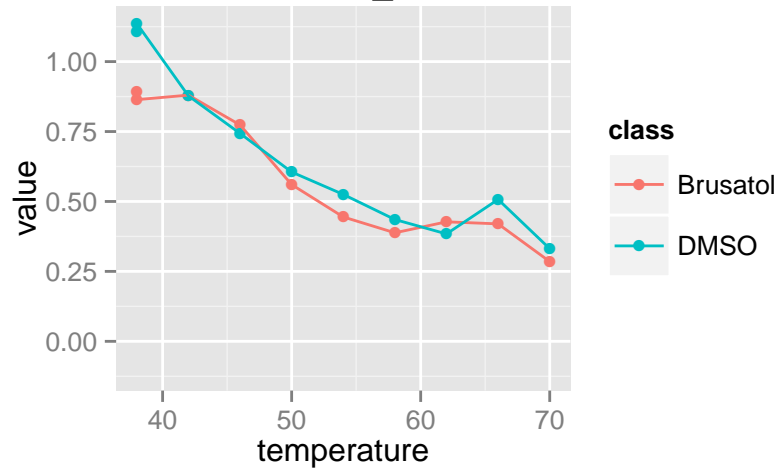

Prot: DPP2\_HUMAN

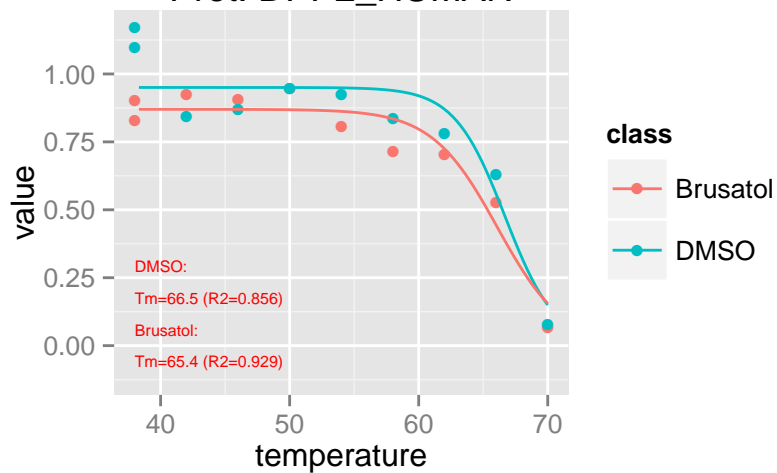

Prot: DPP3\_HUMAN

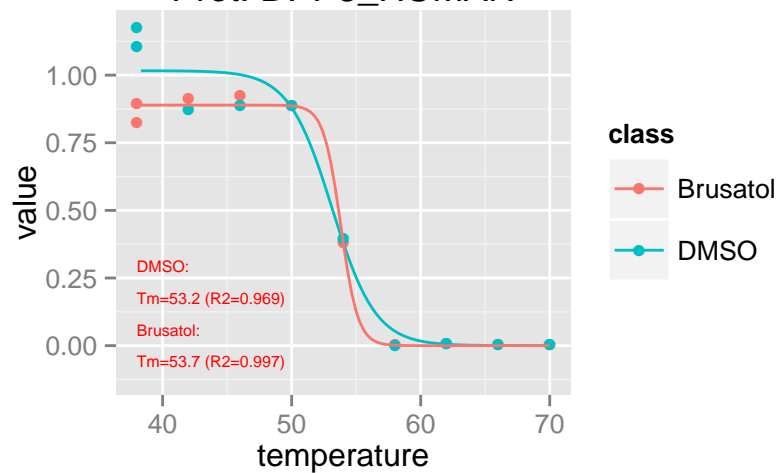

Prot: DPP8\_HUMAN

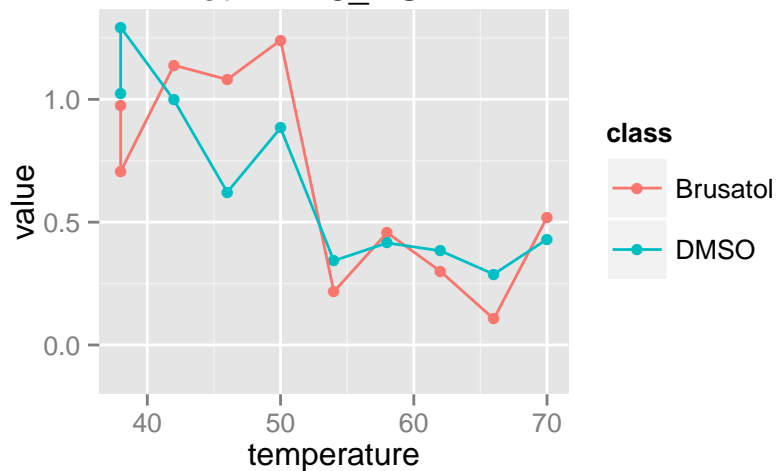

Prot: DPP9\_HUMAN

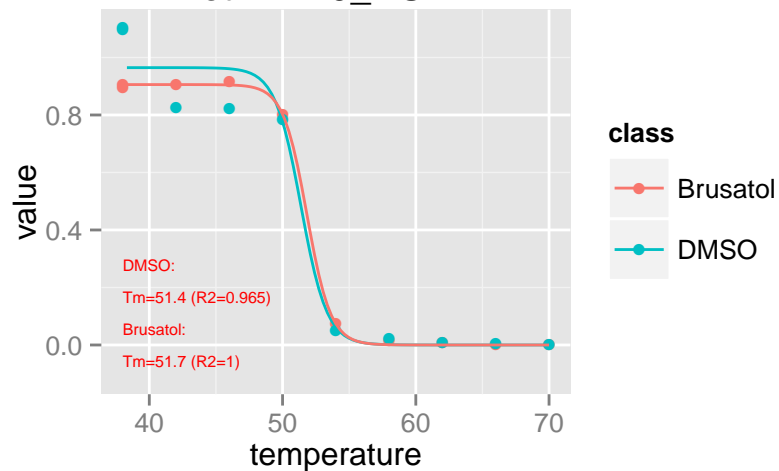

Prot: DPY30\_HUMAN

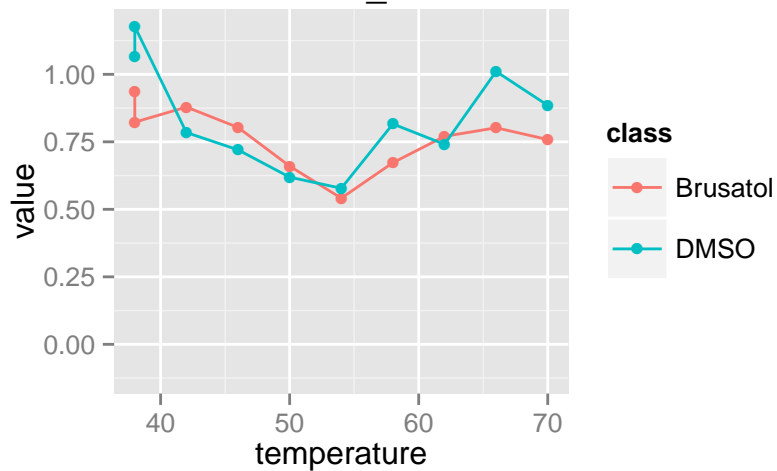

Prot: DPYL1\_HUMAN

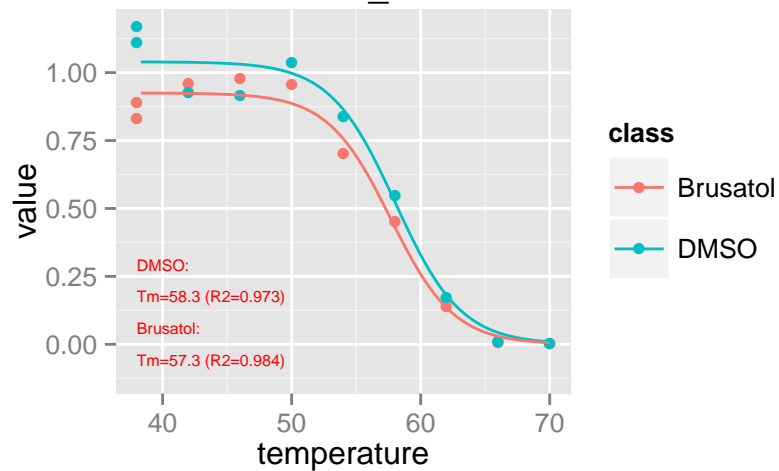

Prot: DPYL2\_HUMAN

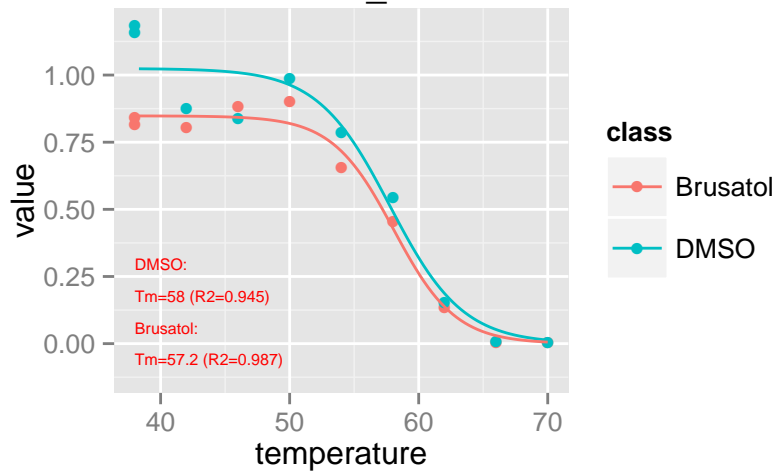

Prot: DPYL3\_HUMAN

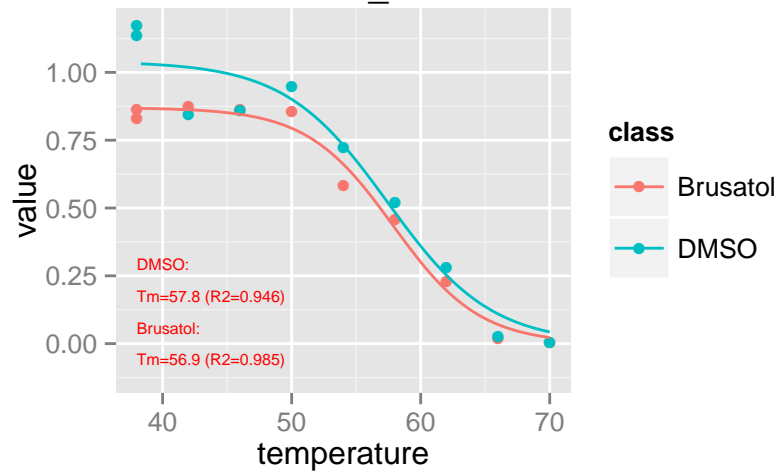

Prot: DREB\_HUMAN

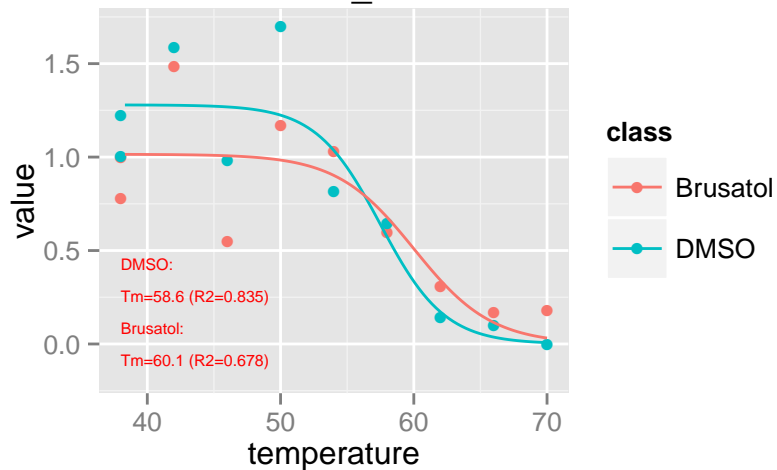

Prot: DRG1\_HUMAN

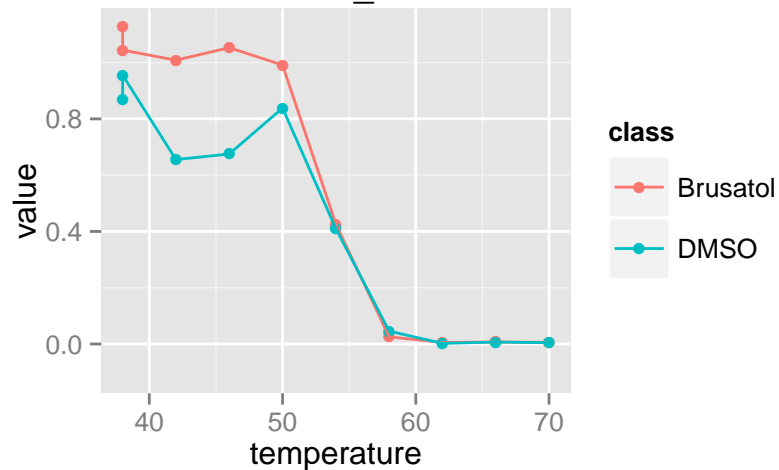

Prot: DRG2\_HUMAN

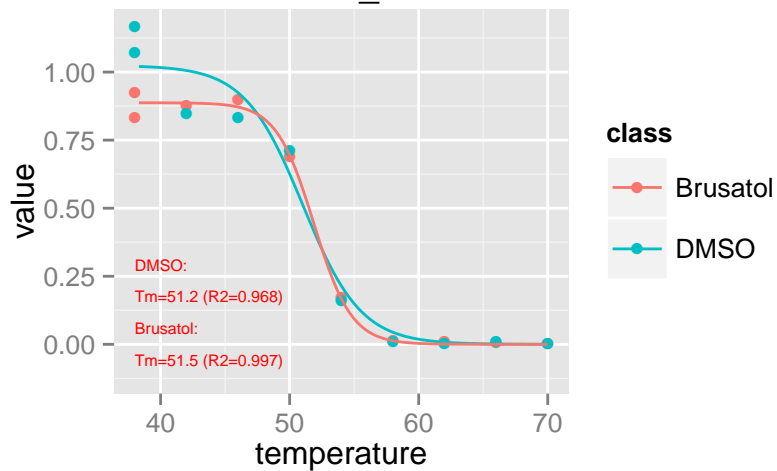

Prot: DSCR3\_HUMAN

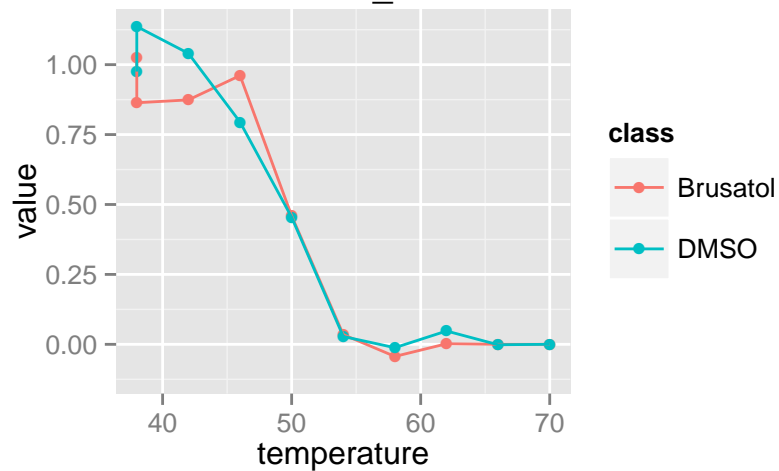

Prot: DSG2\_HUMAN

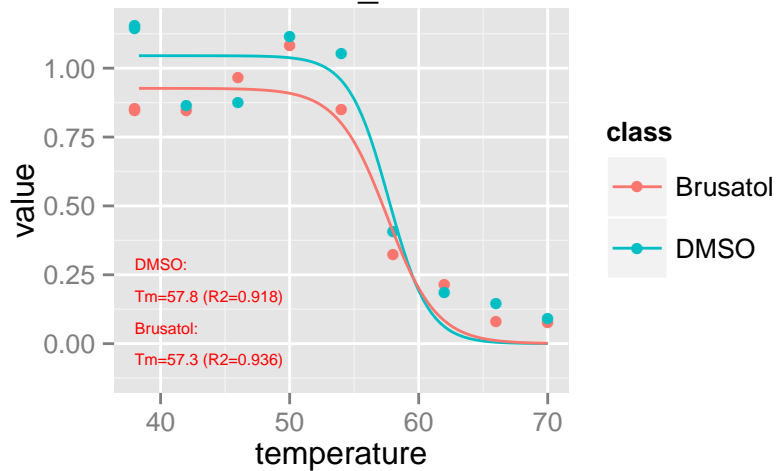

Prot: DSRAD\_HUMAN

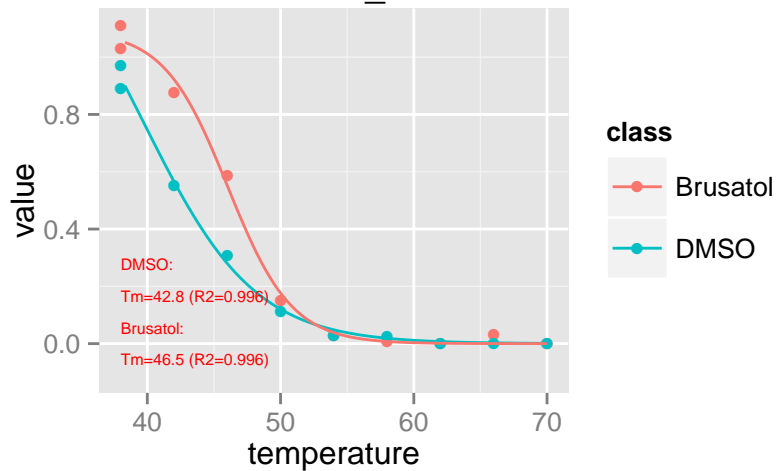

Prot: DTD1\_HUMAN

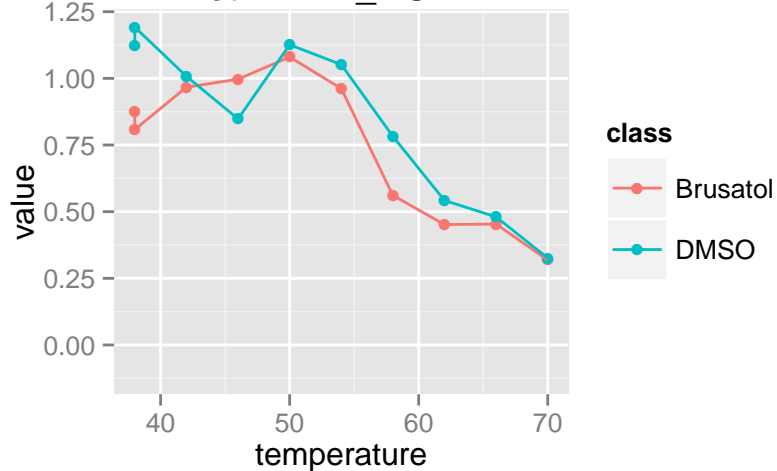

Prot: DTD2\_HUMAN

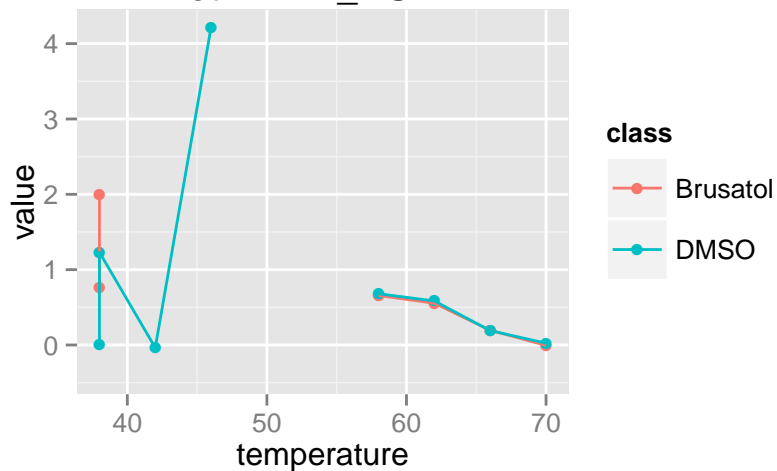

Prot: DUS12\_HUMAN

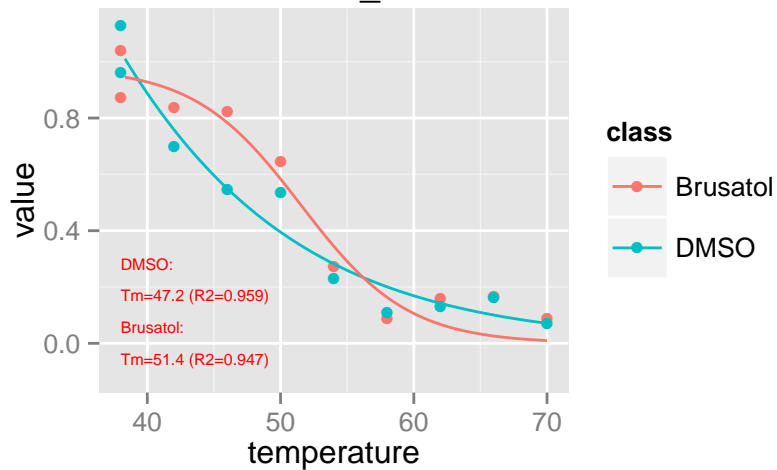

Prot: DUS1L\_HUMAN

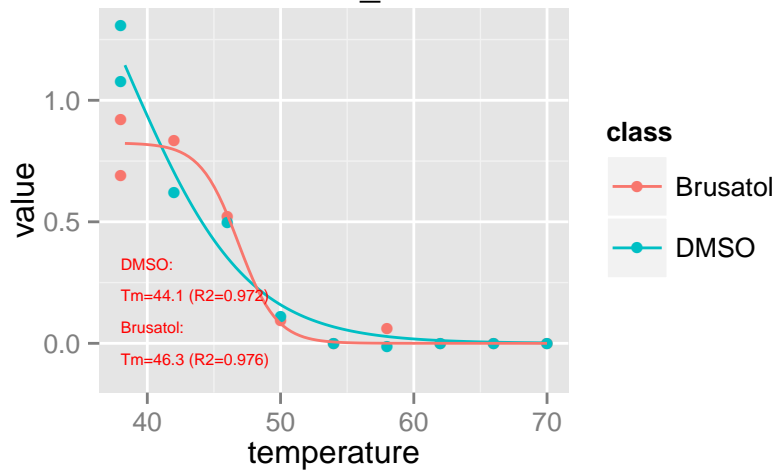



Prot: DUS23\_HUMAN

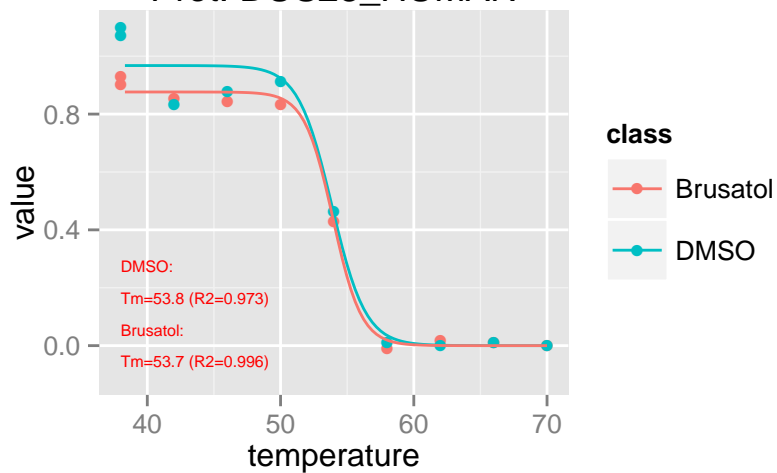

Prot: DUS2L\_HUMAN

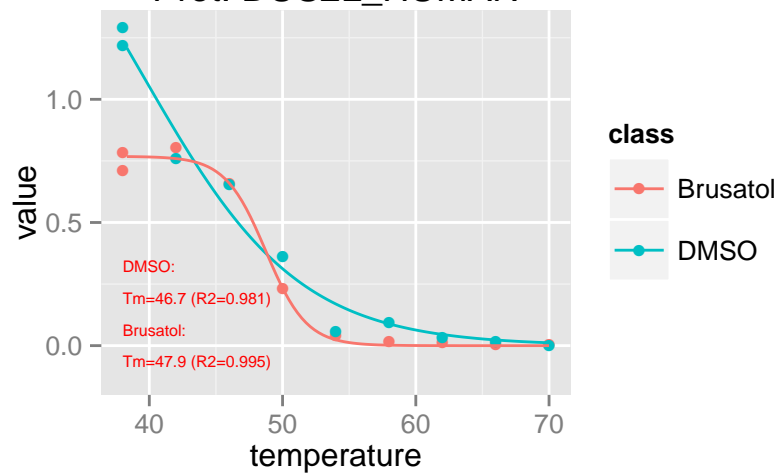

Prot: DUS3\_HUMAN

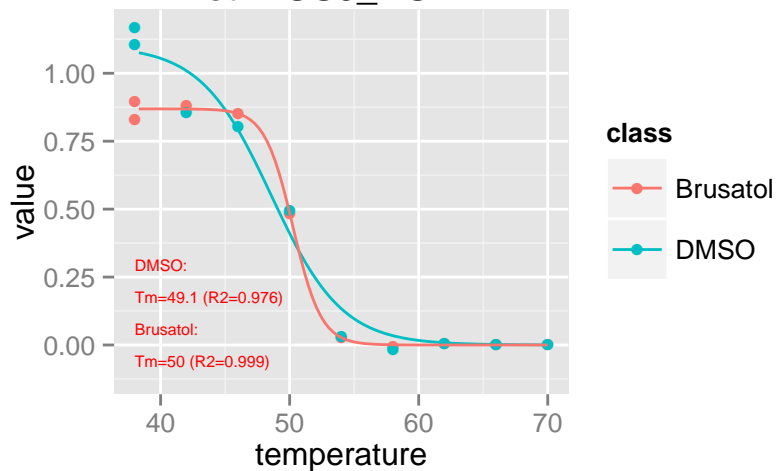

Prot: DUS3L\_HUMAN

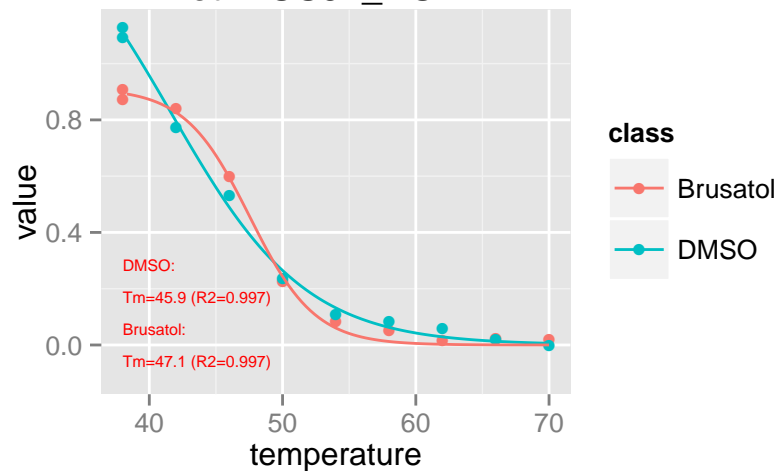

Prot: DUT\_HUMAN

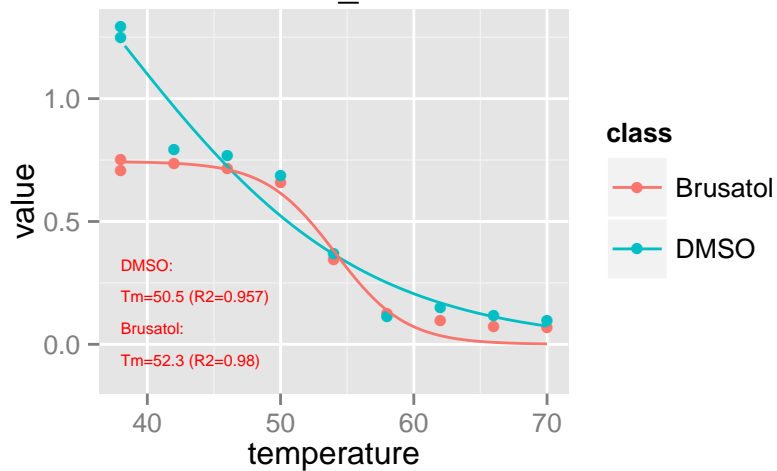

Prot: DVL2\_HUMAN

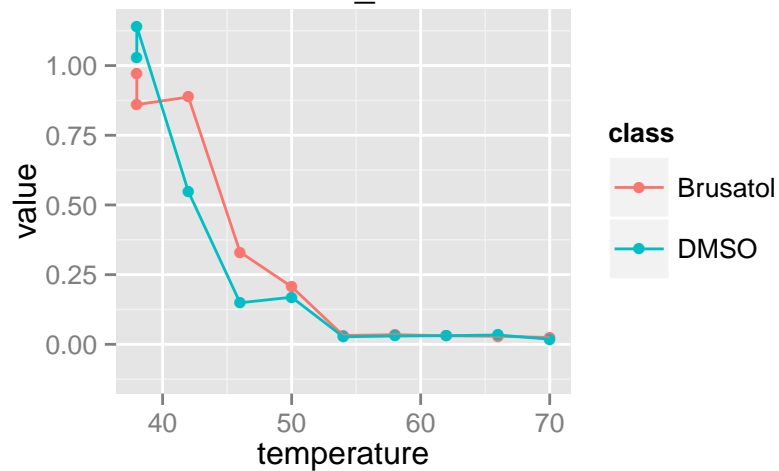

Prot: DX39A\_HUMAN

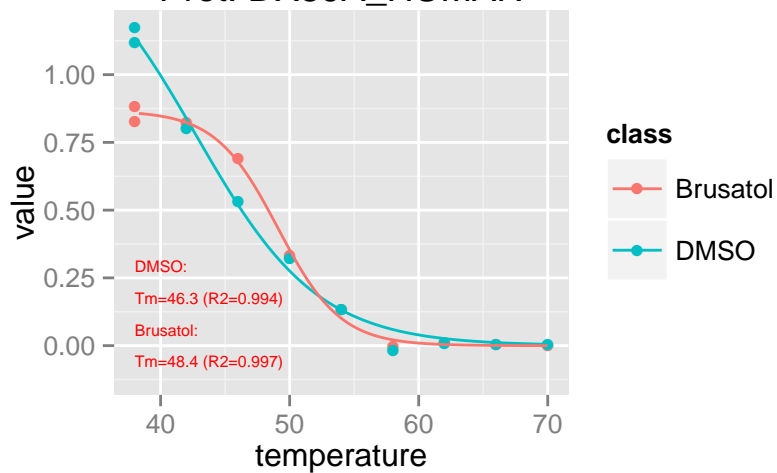

Prot: DX39B\_HUMAN

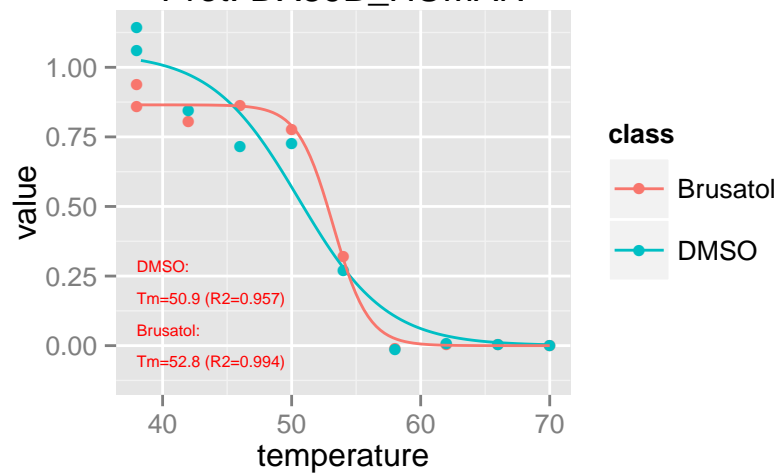

Prot: DYH17\_HUMAN

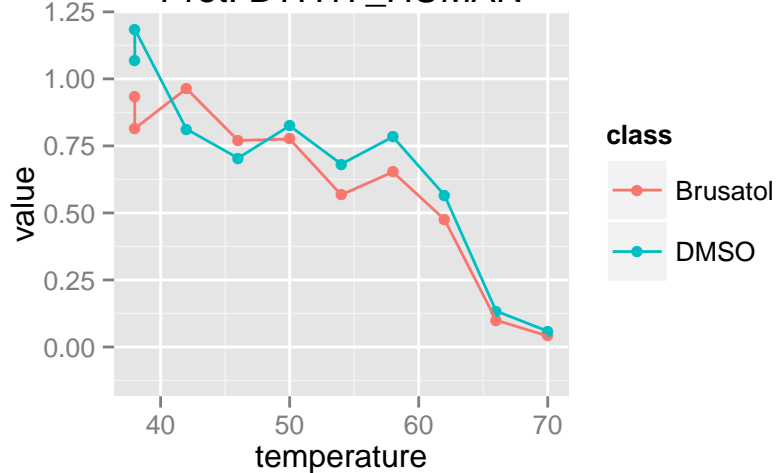

Prot: DYHC1\_HUMAN

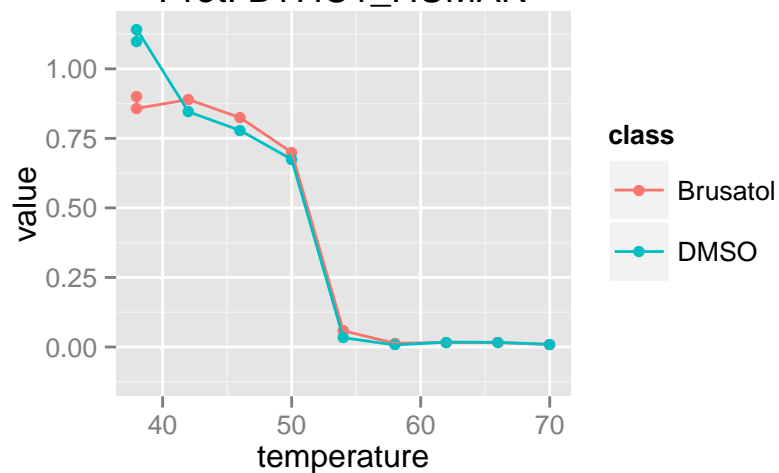

Prot: DYHC2\_HUMAN

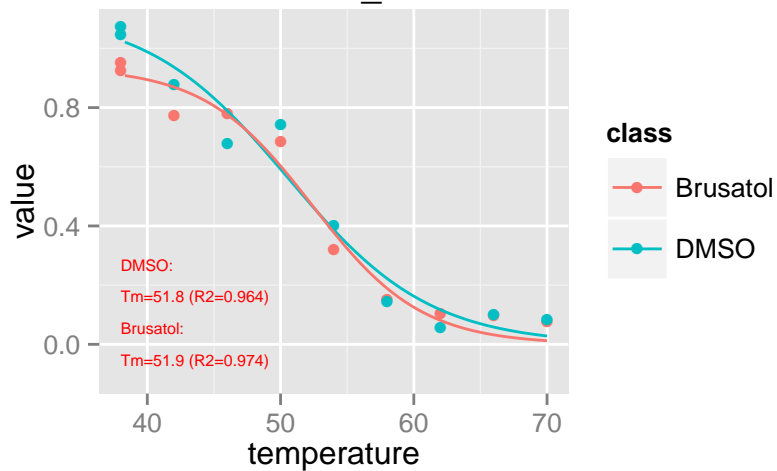

Prot: DYL1\_HUMAN

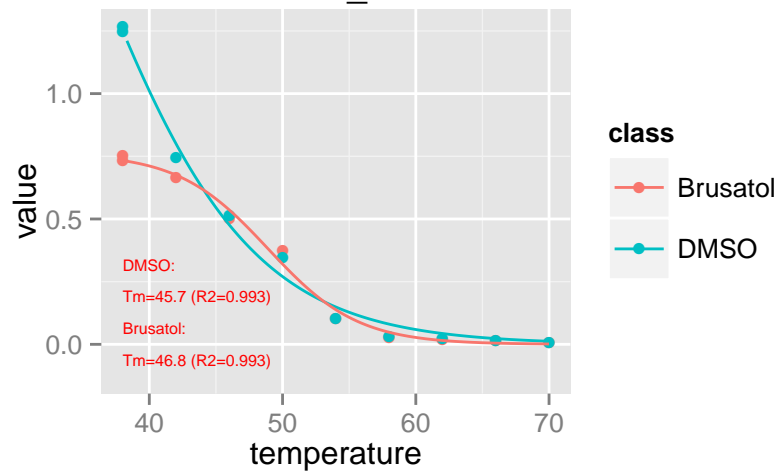

Prot: DYLT1\_HUMAN

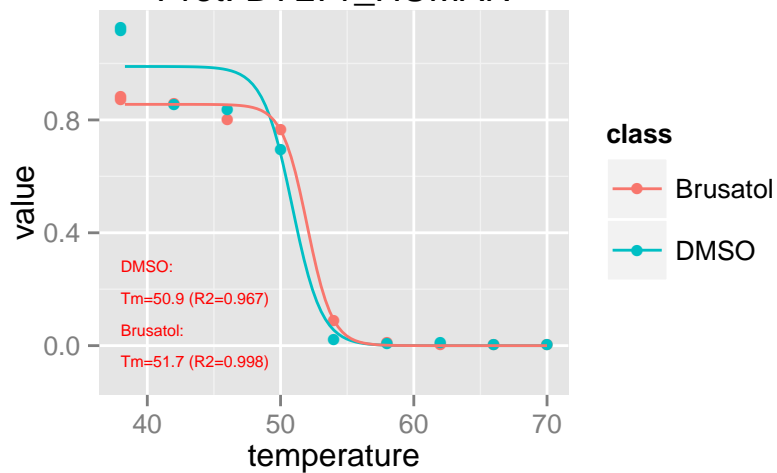

Prot: DYN1\_HUMAN

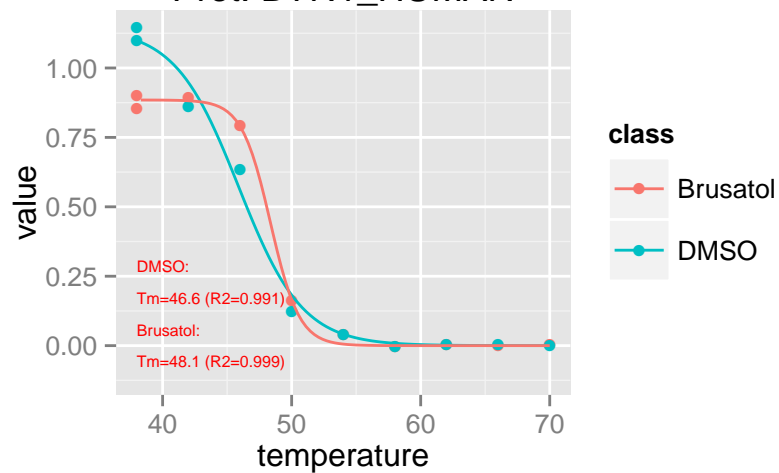

Prot: DYN2\_HUMAN

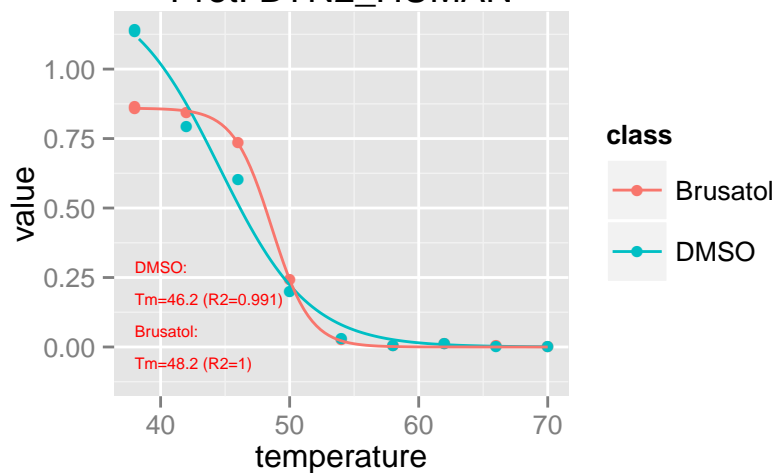

Prot: DYR\_HUMAN

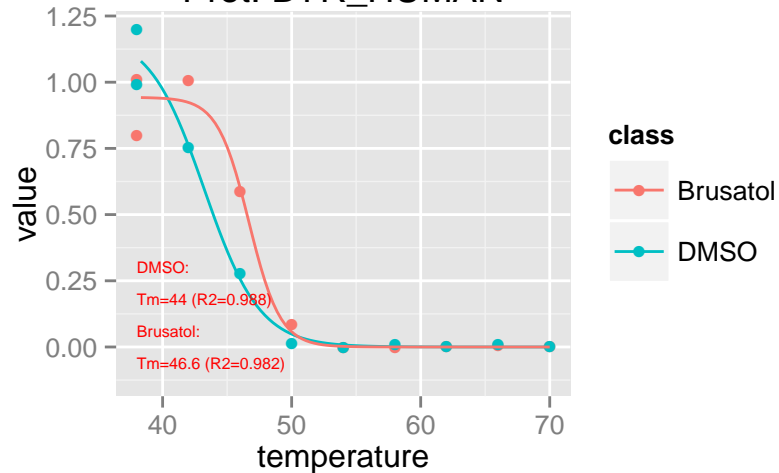

Prot: DYST\_HUMAN

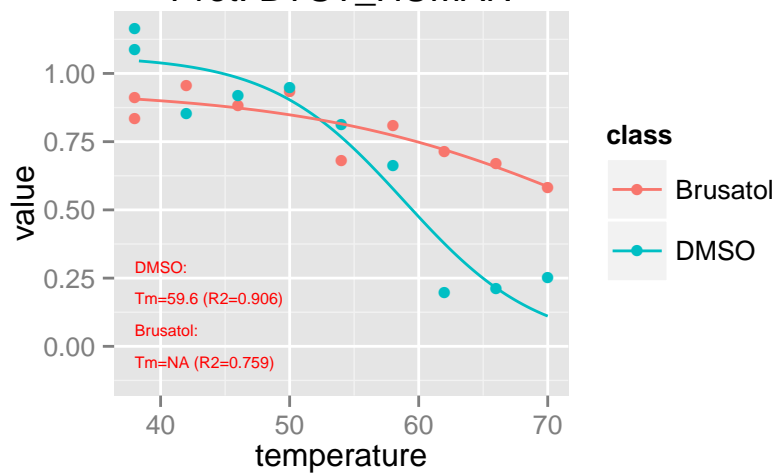

Prot: E2AK2\_HUMAN

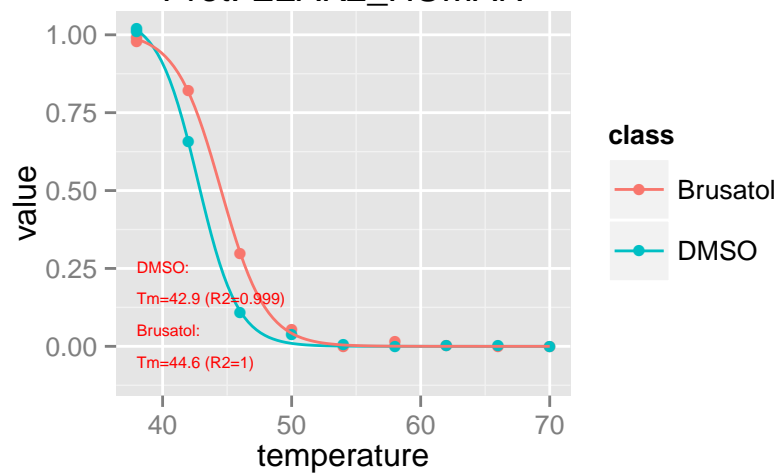

Prot: E41L1\_HUMAN

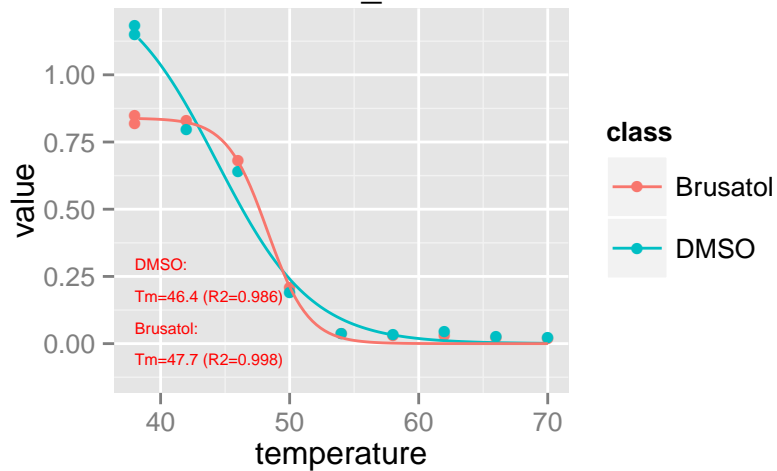

Prot: E41L2\_HUMAN

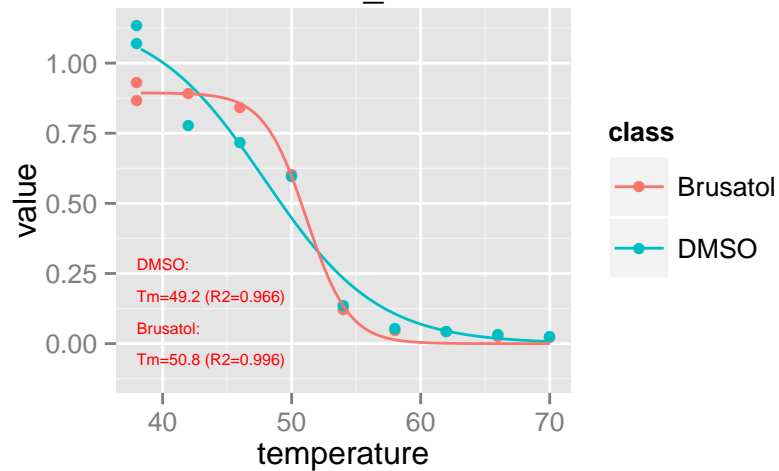

Prot: E5KND7\_HUMAN

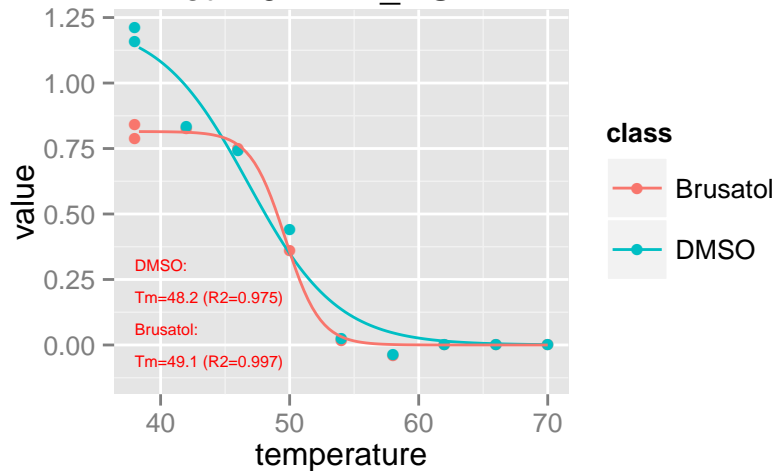

Prot: E7EPW1\_HUMAN

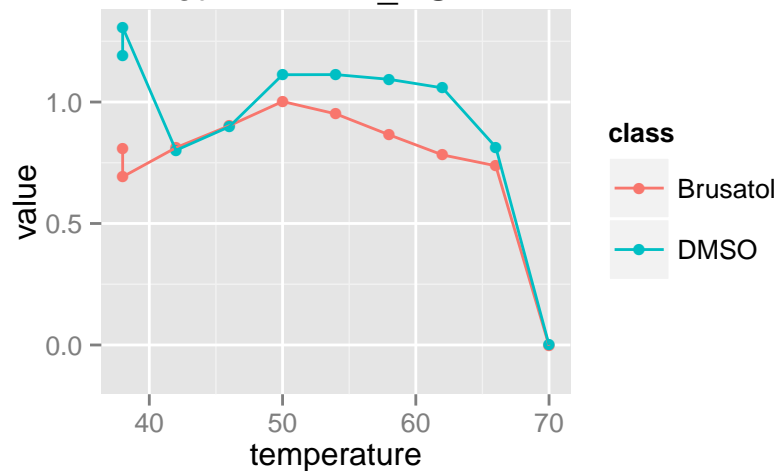

Prot: E7EUQ8\_HUMAN

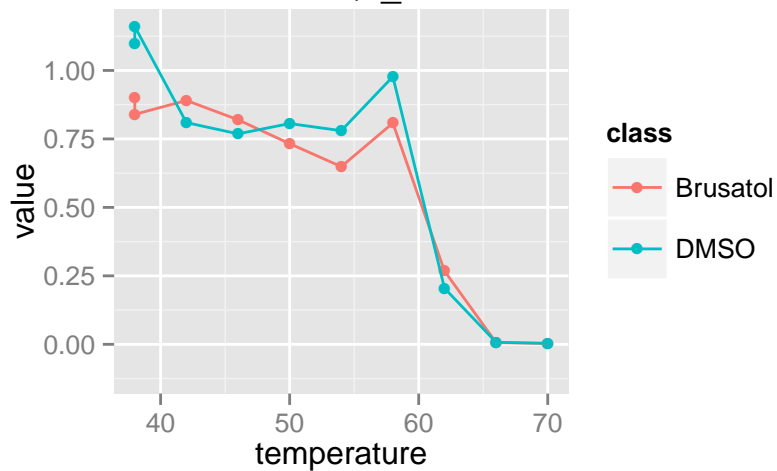

Prot: E7EX44\_HUMAN

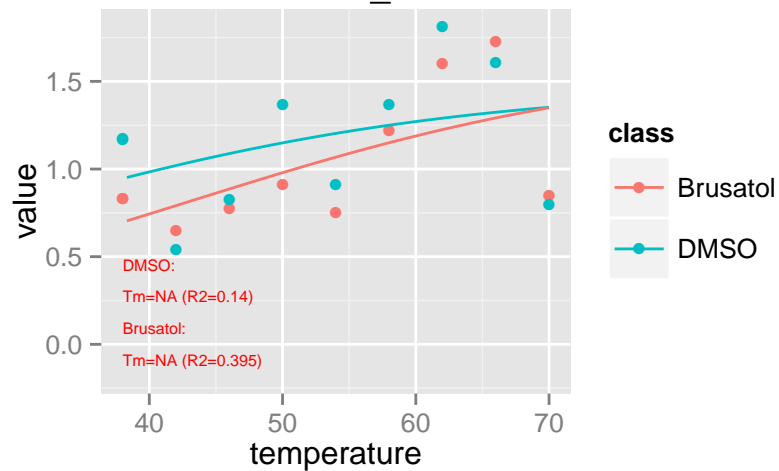

Prot: E9PAV2\_HUMAN

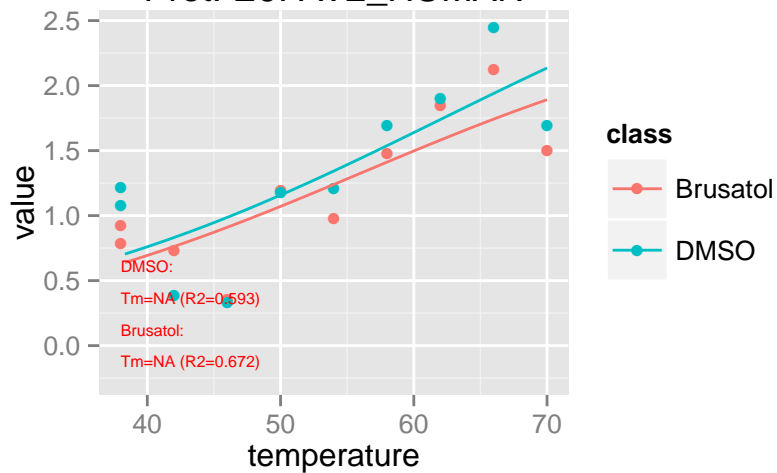

Prot: E9PLD3\_HUMAN

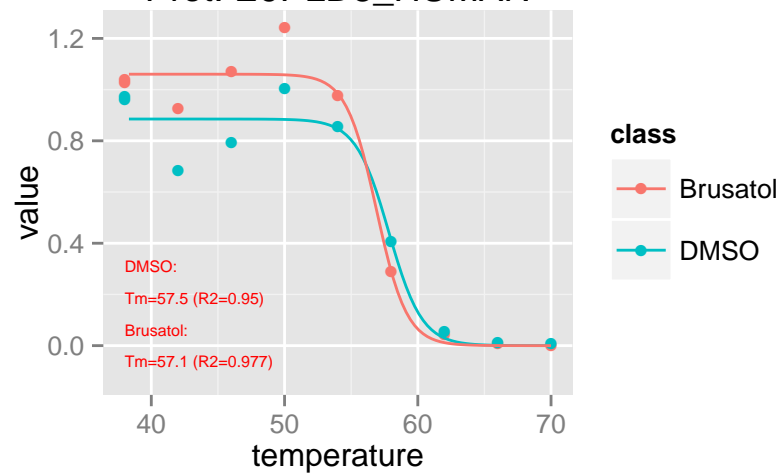

Prot: E9PMU7\_HUMAN

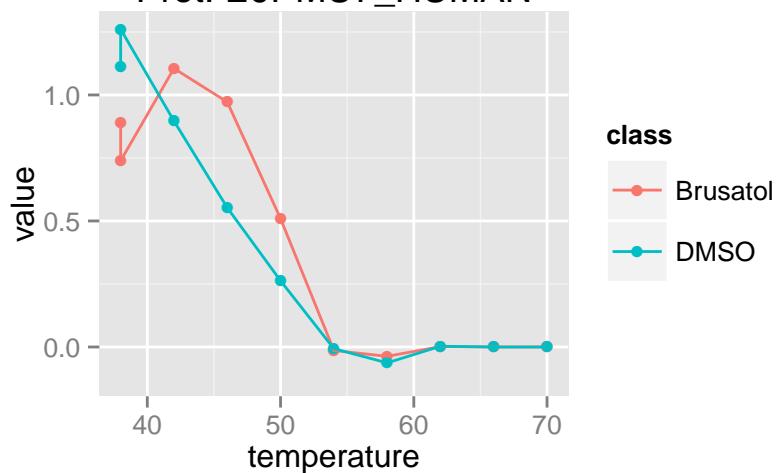

Prot: E9PNV3\_HUMAN

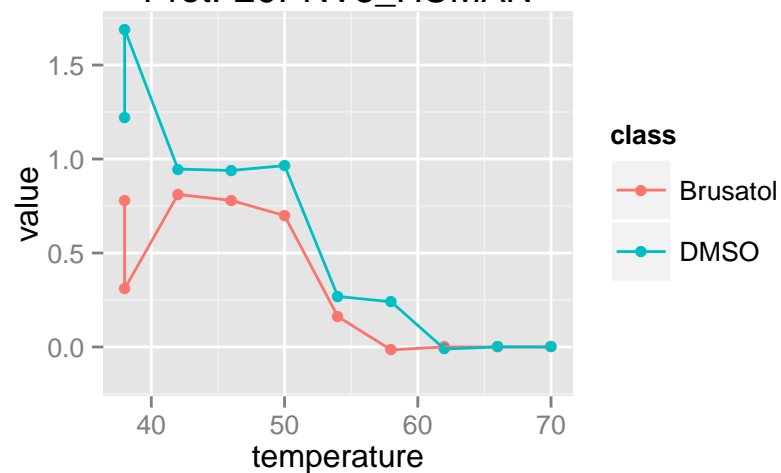

Prot: ECH1\_HUMAN

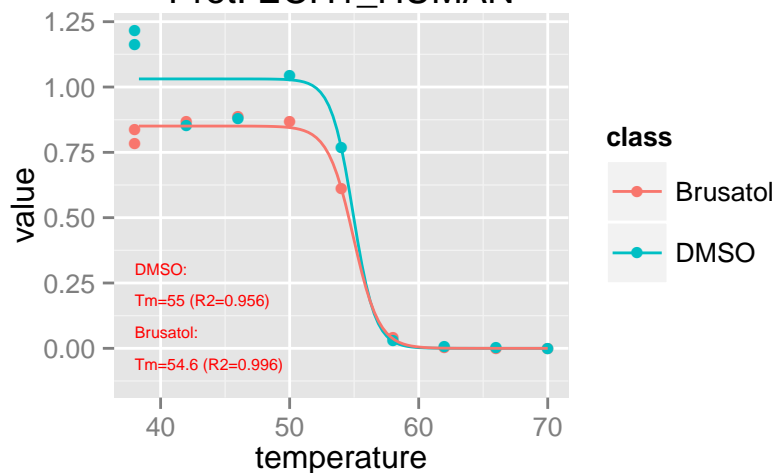

Prot: ECHA\_HUMAN

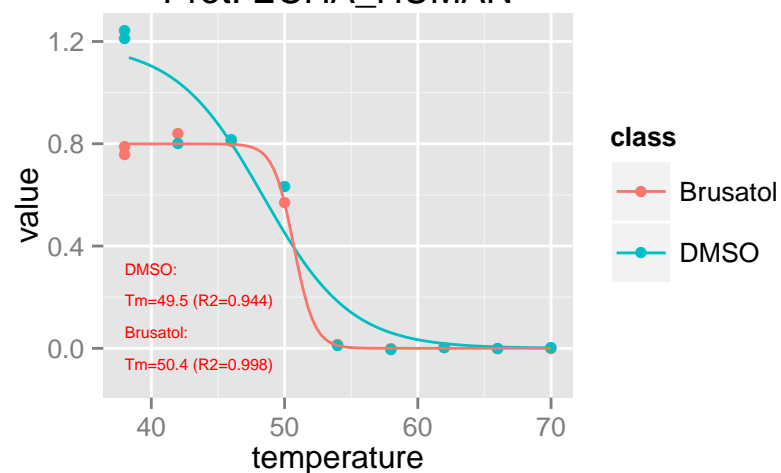

Prot: ECHB\_HUMAN

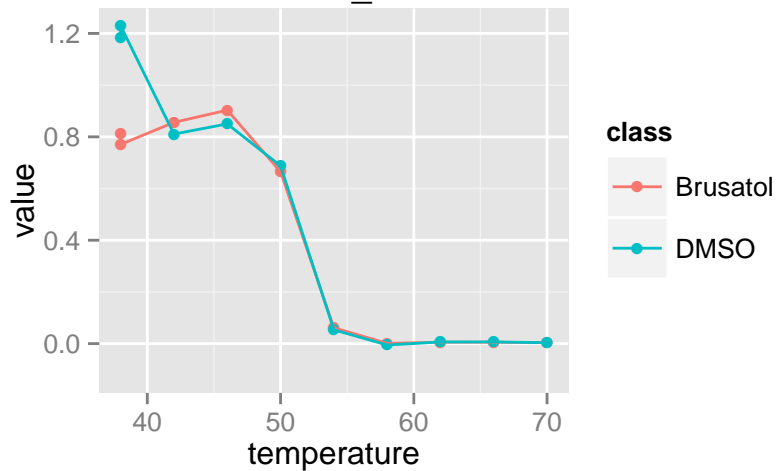

Prot: ECHD1\_HUMAN

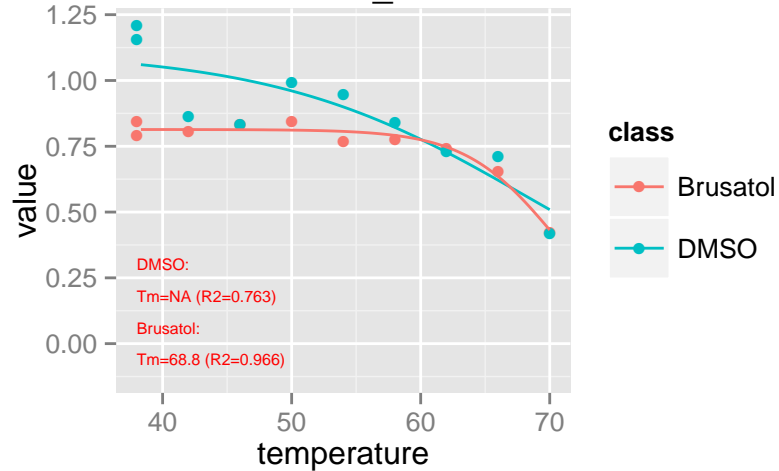

Prot: ECHM\_HUMAN

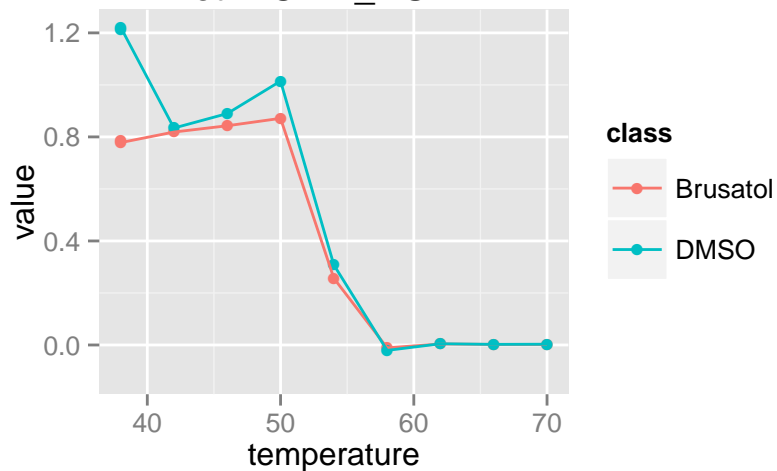

Prot: ECI1\_HUMAN

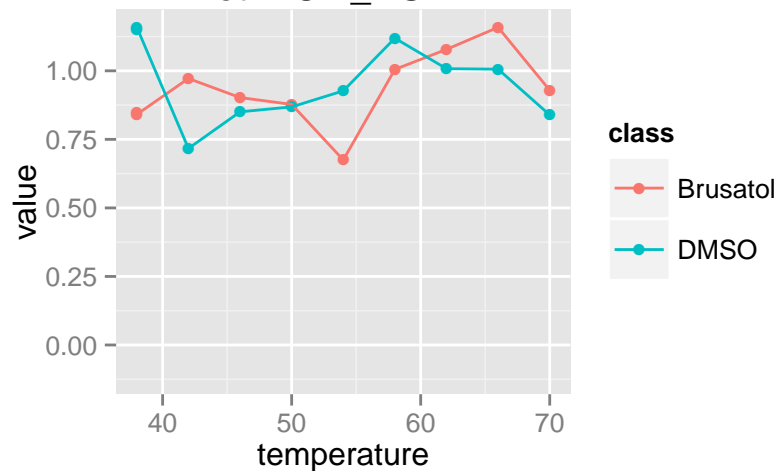

Prot: ECI2\_HUMAN

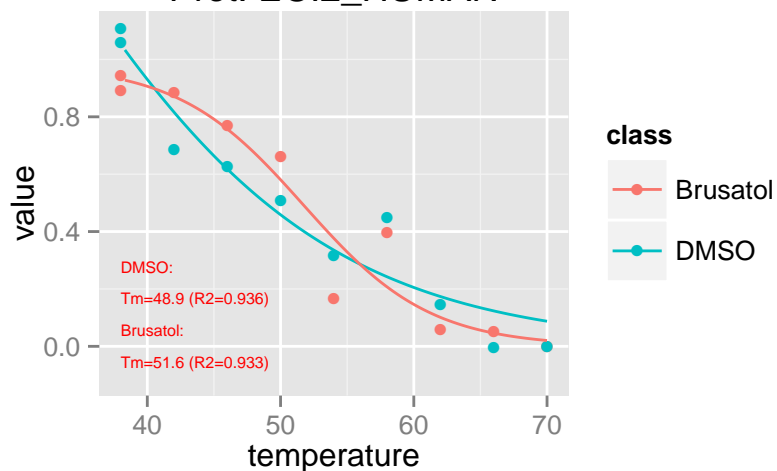

Prot: ECM29\_HUMAN

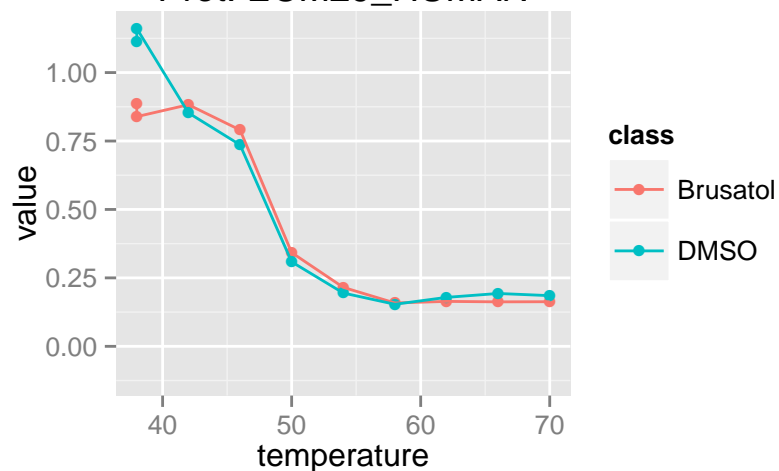

Prot: ECT2\_HUMAN

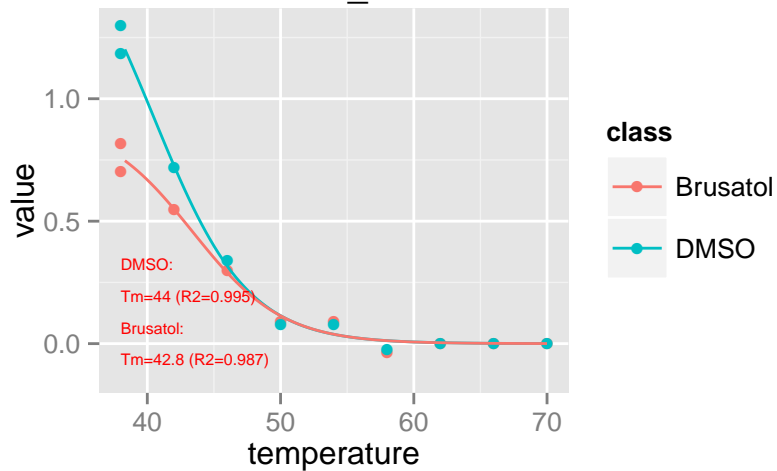

Prot: EDC4\_HUMAN

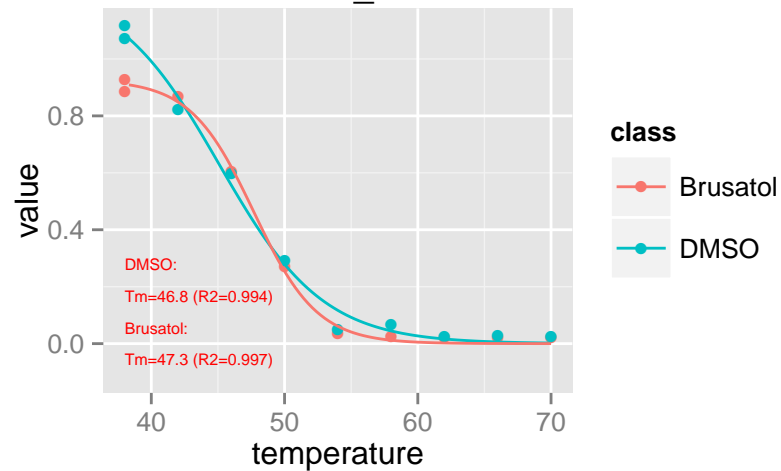

Prot: EDF1\_HUMAN

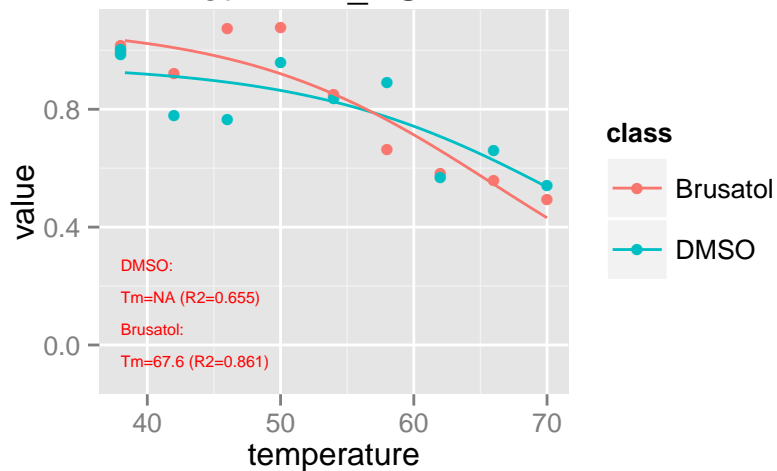

Prot: EEA1\_HUMAN

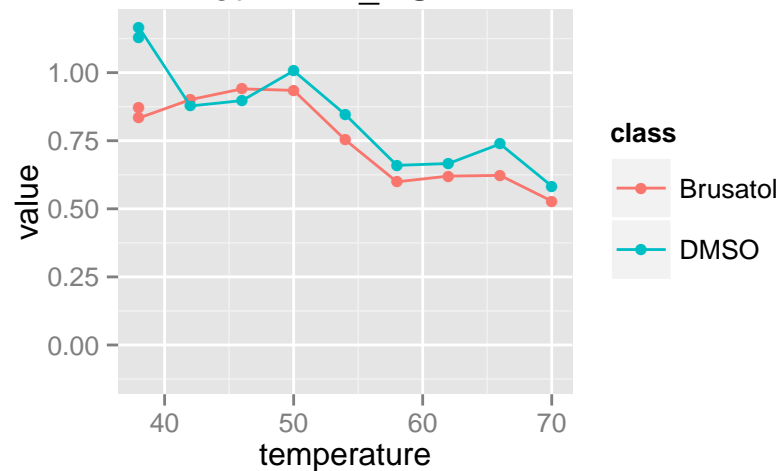

Prot: EF1A1\_HUMAN

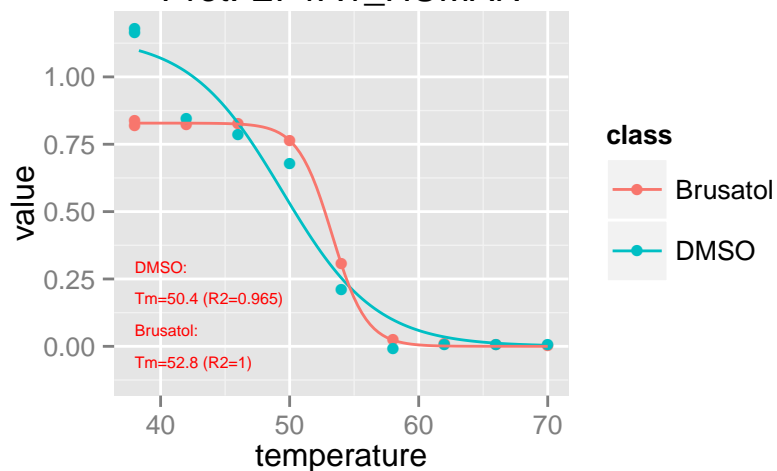

Prot: EF1A2\_HUMAN

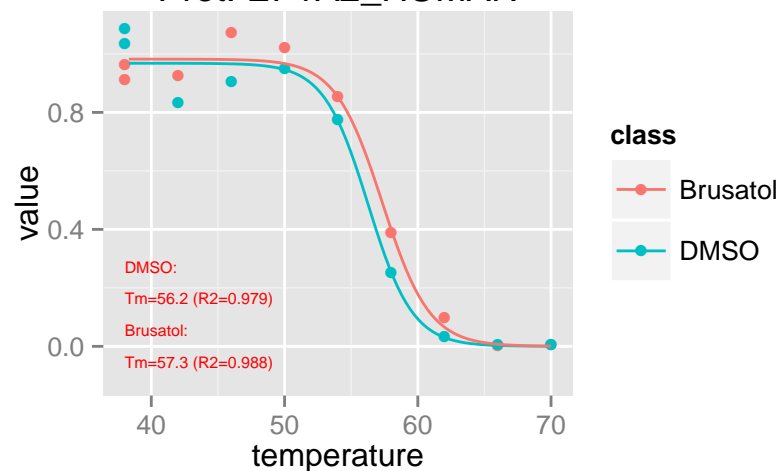

Prot: EF1B\_HUMAN

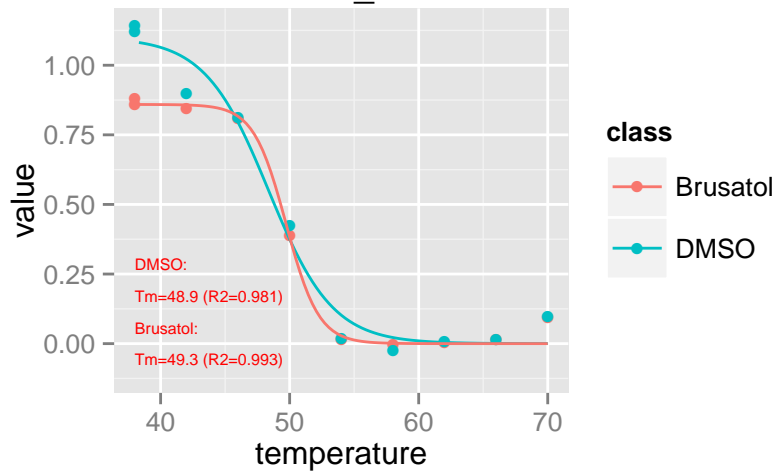

Prot: EF1D\_HUMAN

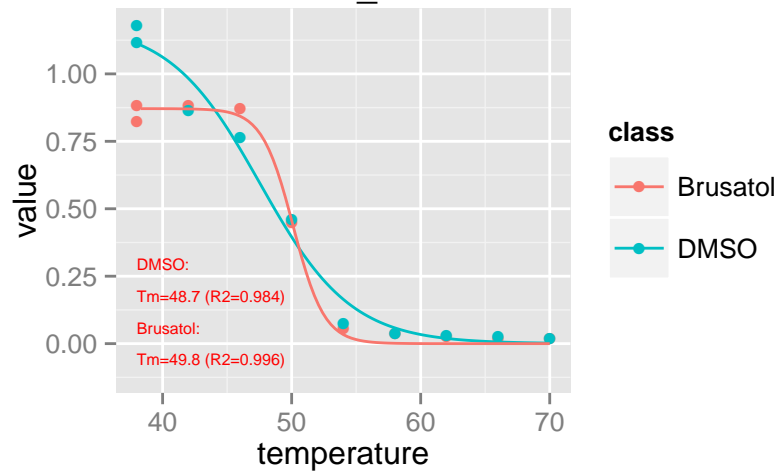

Prot: EF1G\_HUMAN

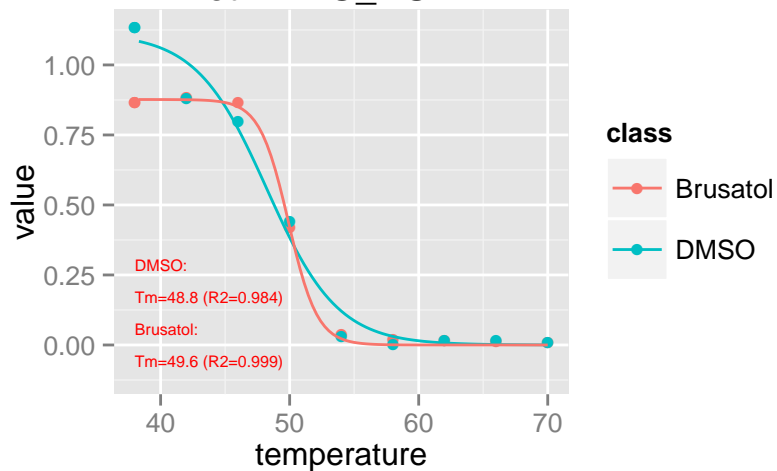

Prot: EF2\_HUMAN

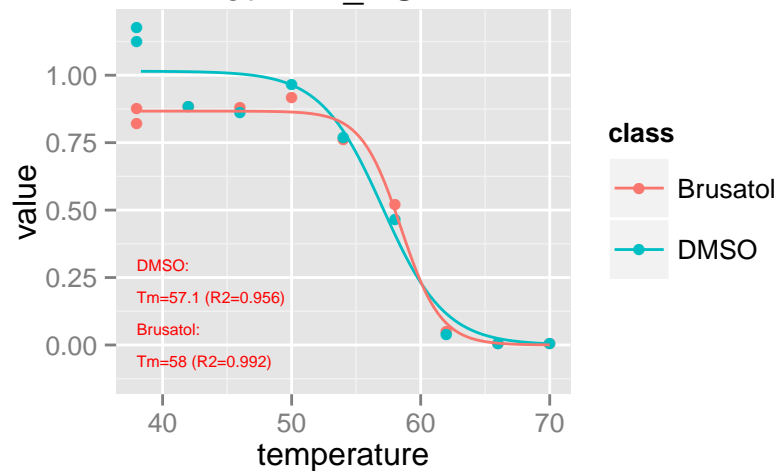

Prot: EFGM\_HUMAN

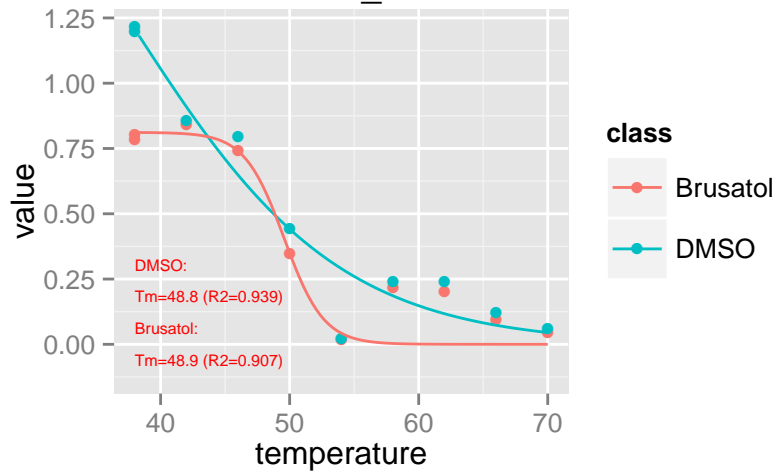

Prot: EFHA1\_HUMAN

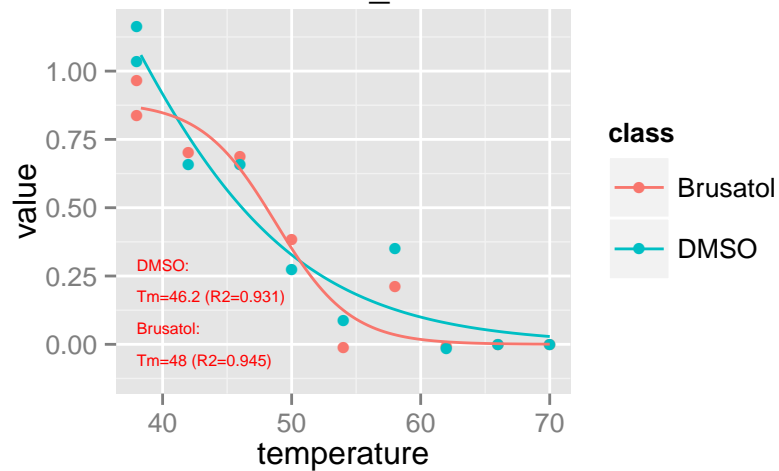



Prot: EFHD1\_HUMAN

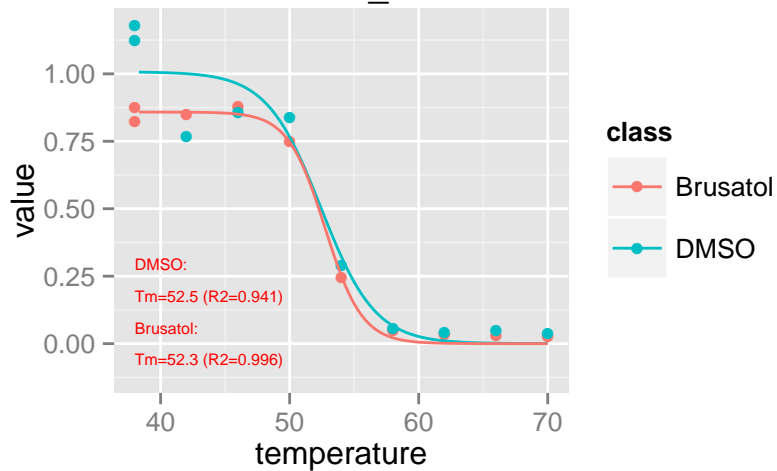

Prot: EFHD2\_HUMAN

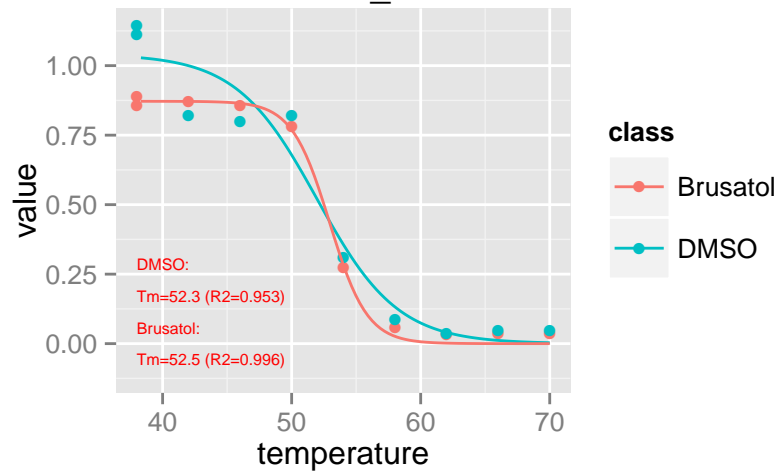

Prot: EFTS\_HUMAN

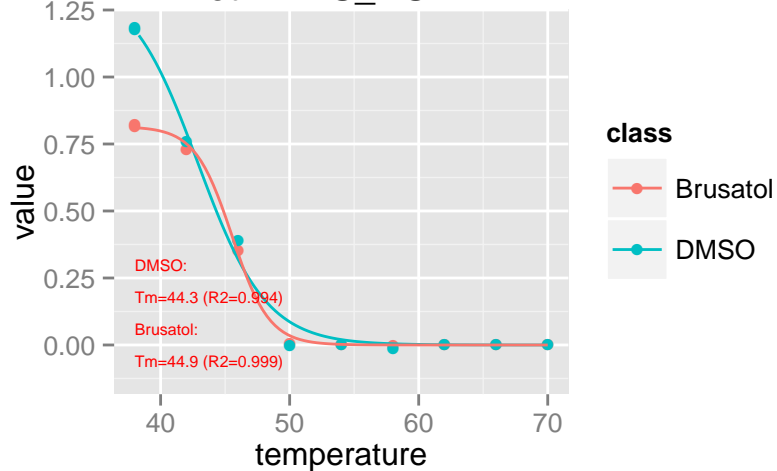

Prot: EFTU\_HUMAN

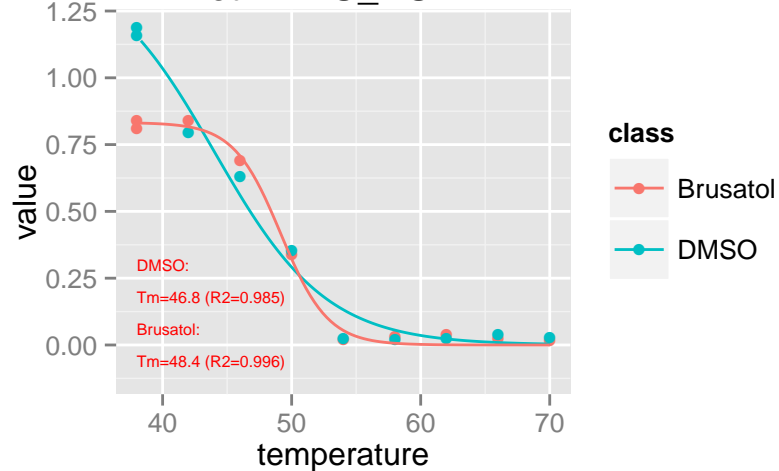

Prot: EGFR\_HUMAN

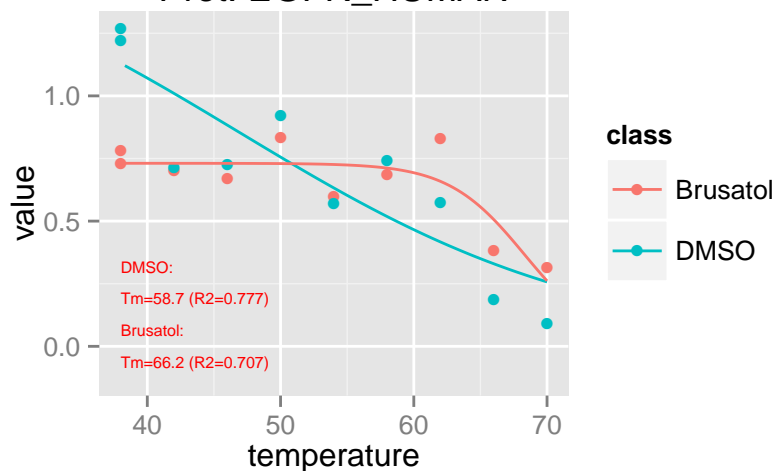

Prot: EGLN1\_HUMAN

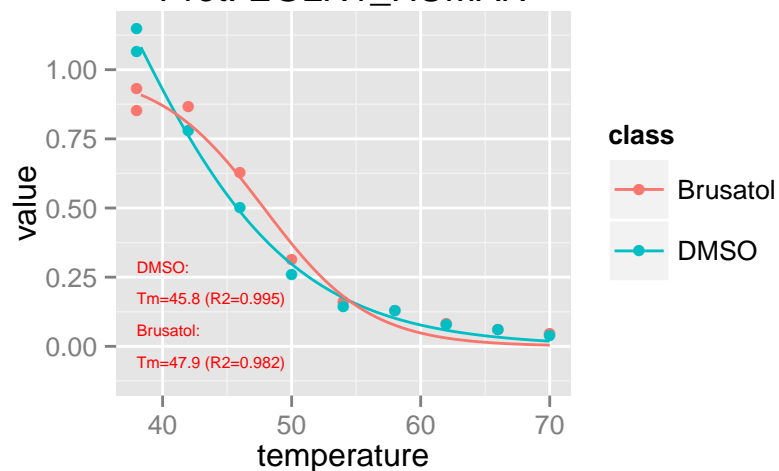

Prot: EH1L1\_HUMAN

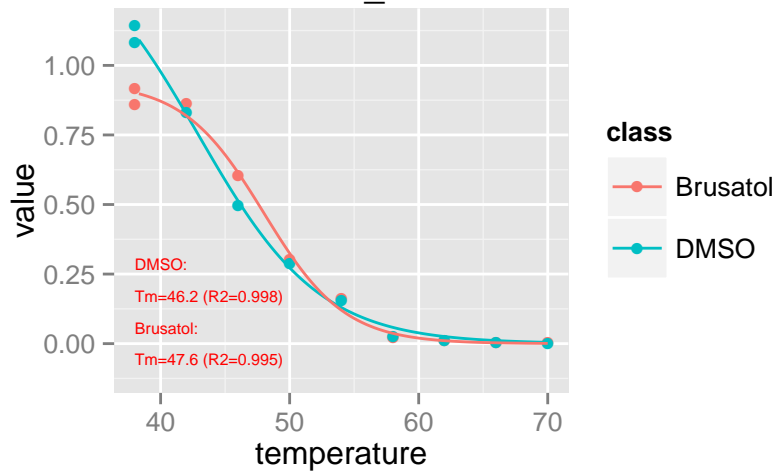

Prot: EHBP1\_HUMAN

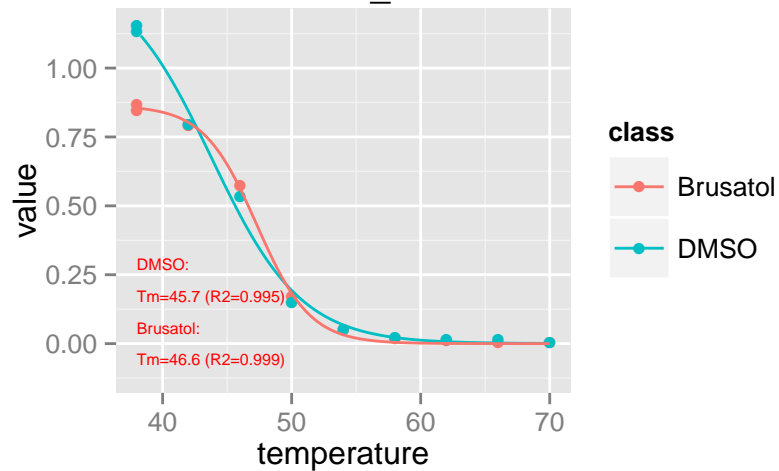

Prot: EHD1\_HUMAN

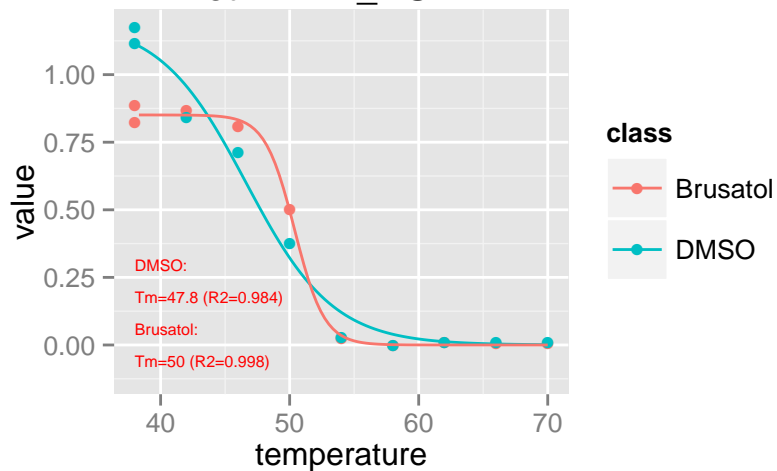

Prot: EHD2\_HUMAN

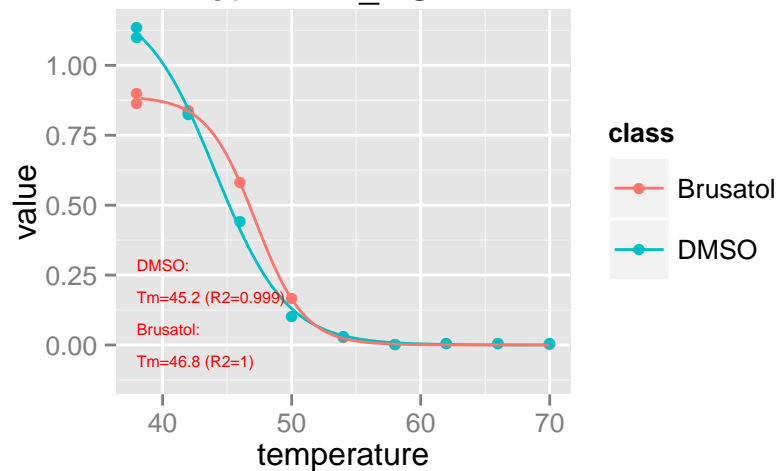

Prot: EHD4\_HUMAN

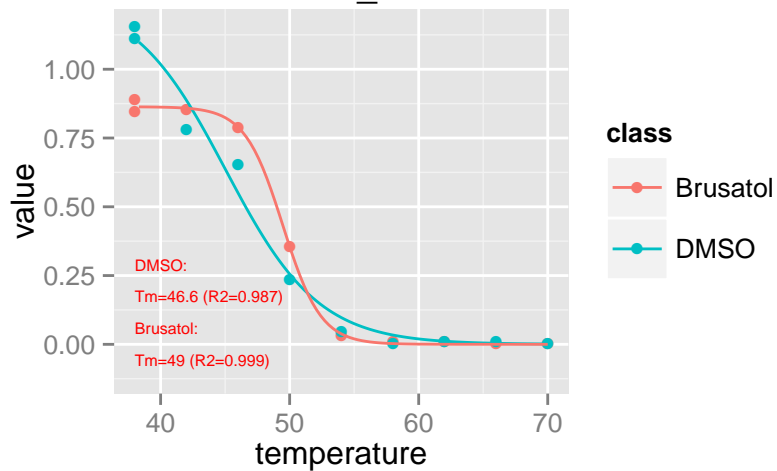

Prot: EI2BA\_HUMAN

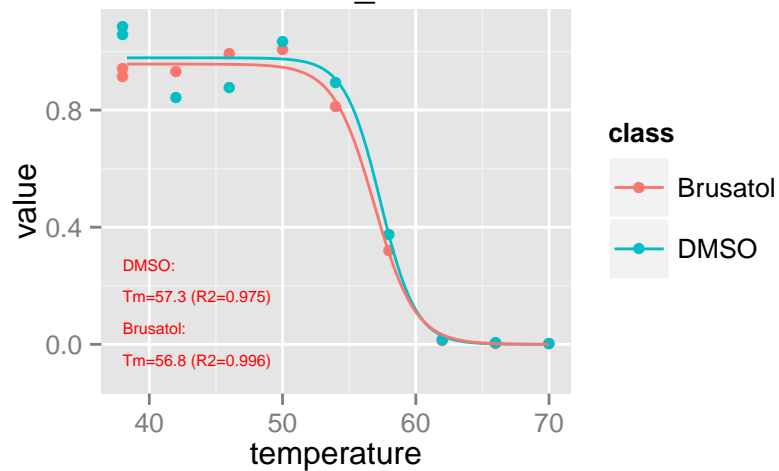

Prot: EI2BB\_HUMAN

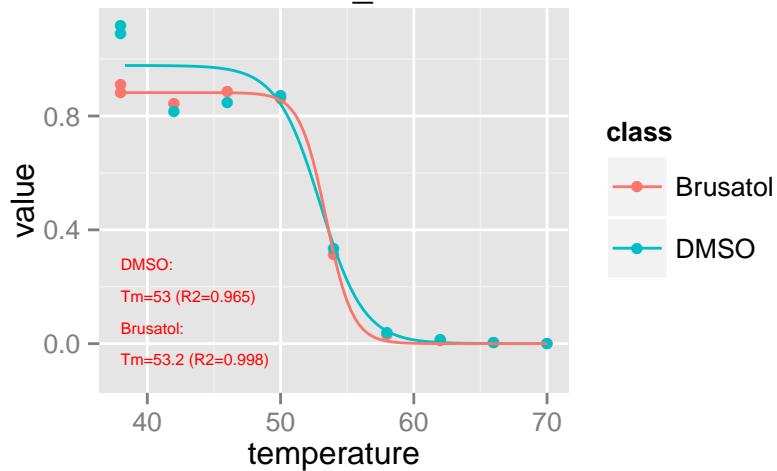

Prot: EI2BD\_HUMAN

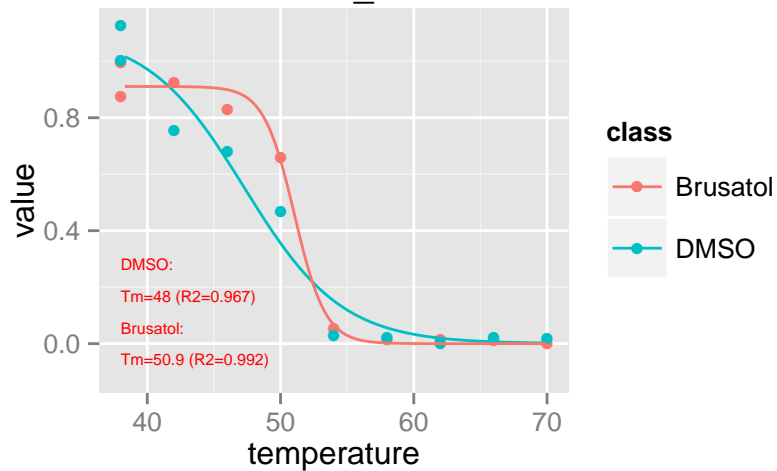

Prot: EI2BE\_HUMAN

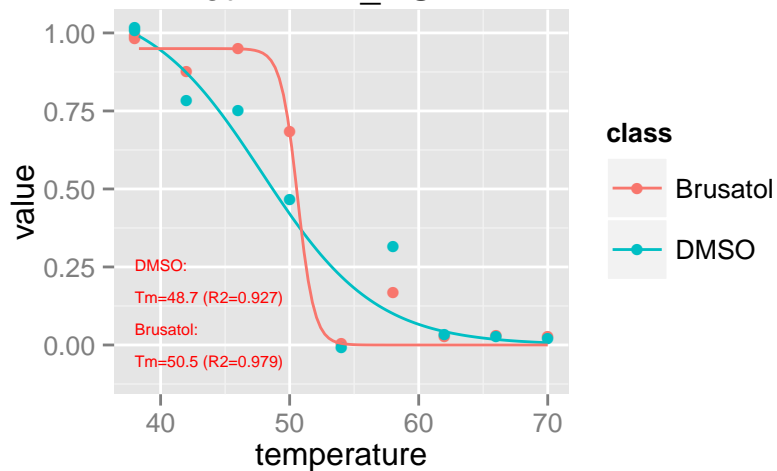

Prot: EI2BG\_HUMAN

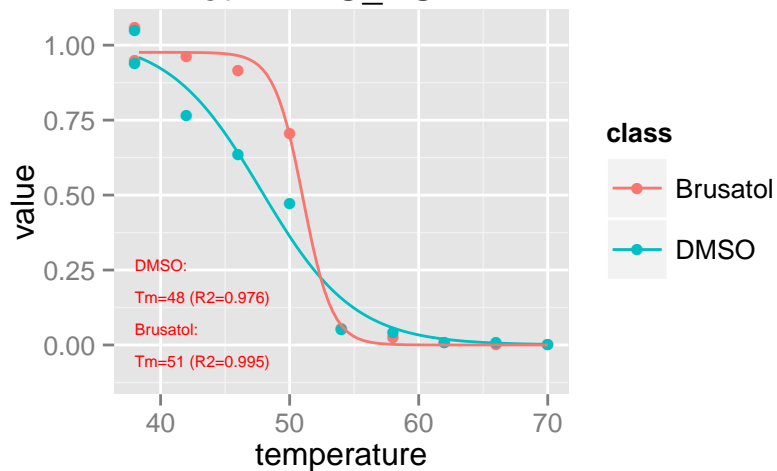

Prot: EIF1A\_HUMAN

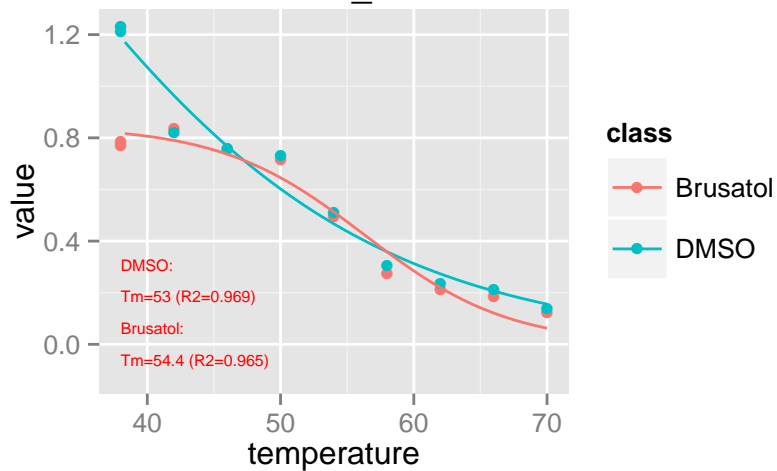

Prot: EIF1B\_HUMAN

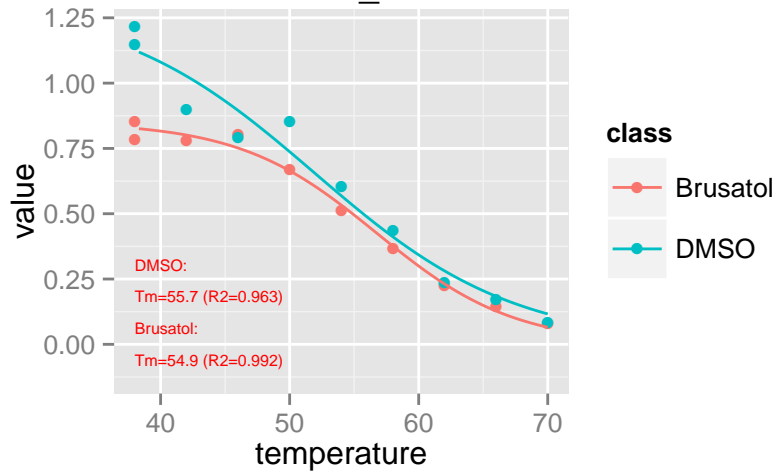

Prot: EIF2A\_HUMAN

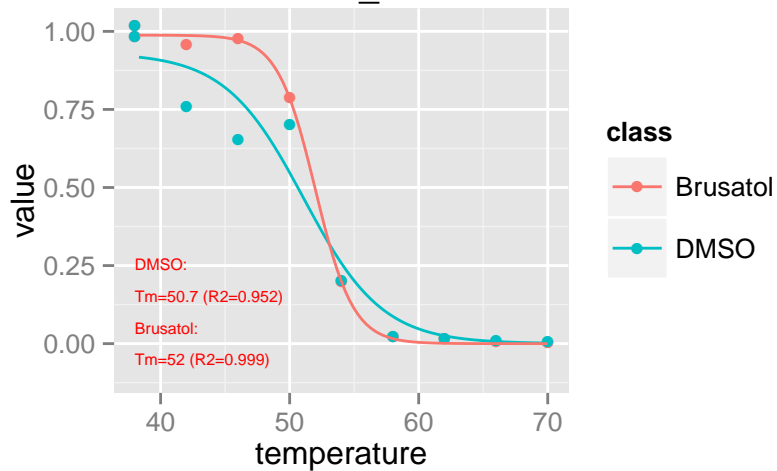

Prot: EIF2D\_HUMAN

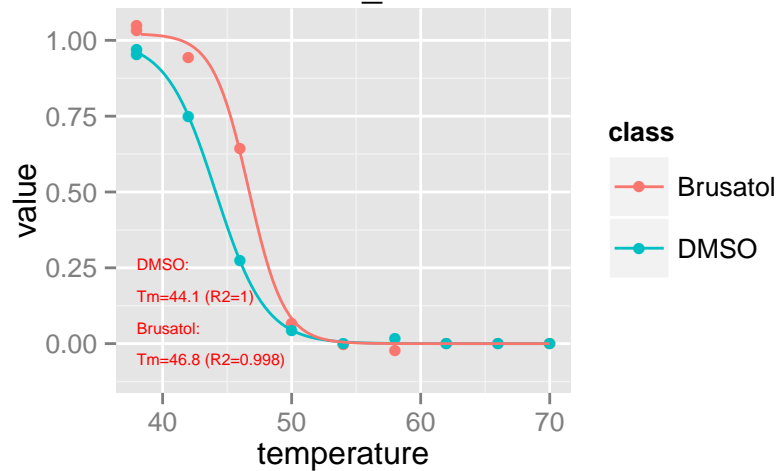

Prot: EIF3A\_HUMAN

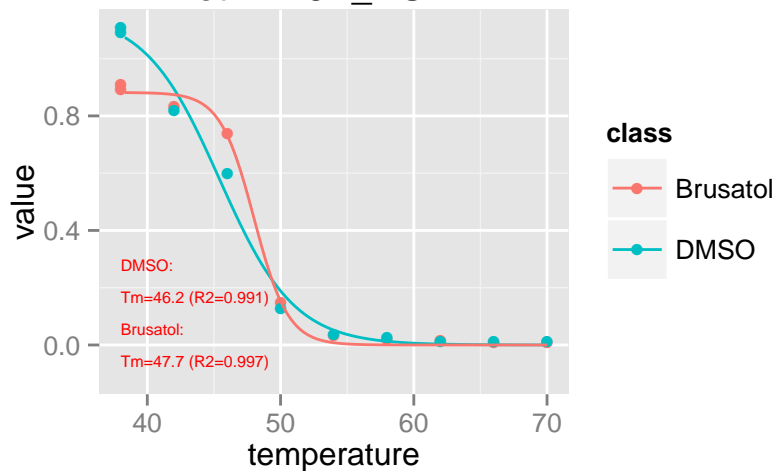

Prot: EIF3B\_HUMAN

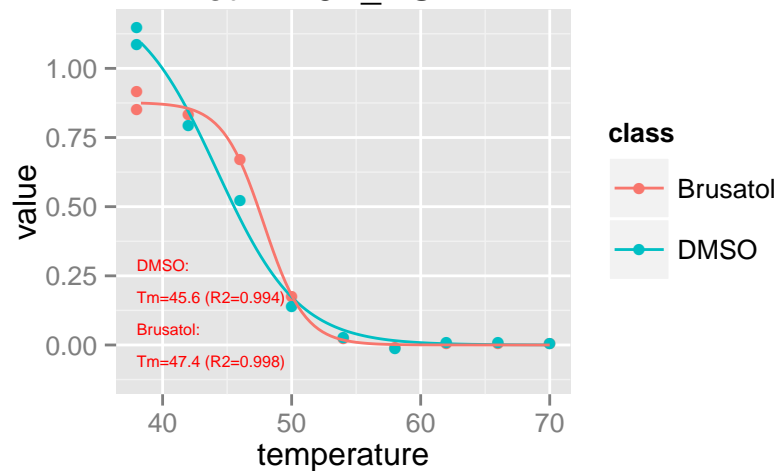

Prot: EIF3C\_HUMAN

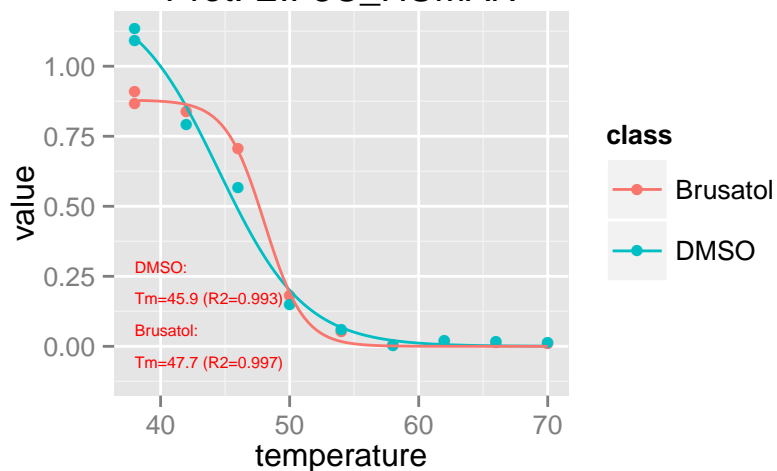

Prot: EIF3D\_HUMAN

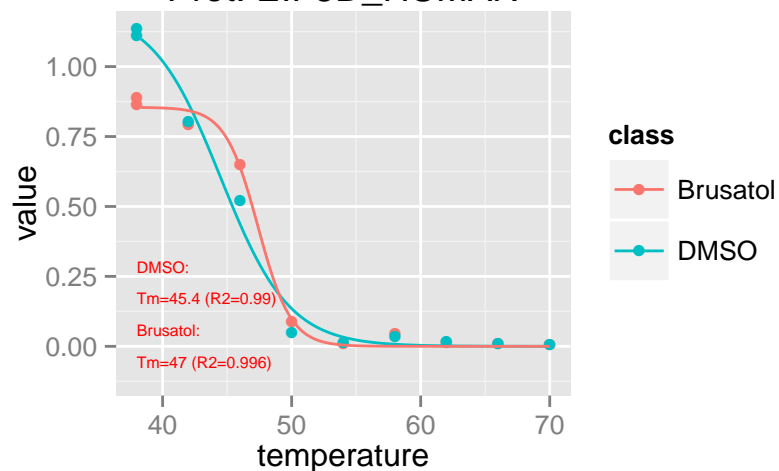

Prot: EIF3E\_HUMAN

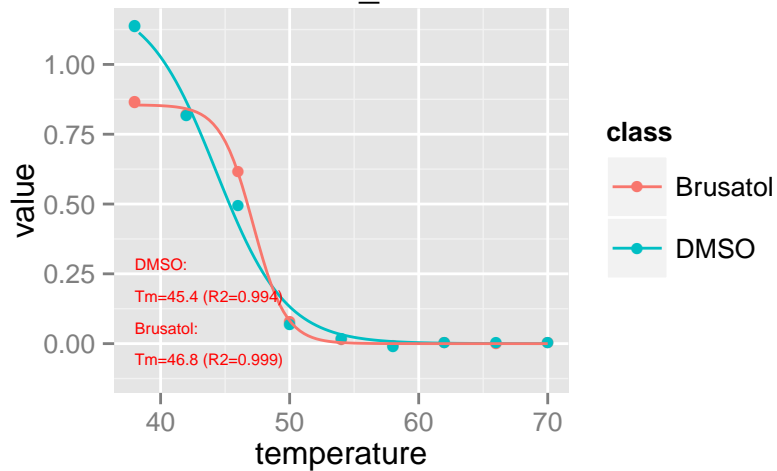

Prot: EIF3F\_HUMAN

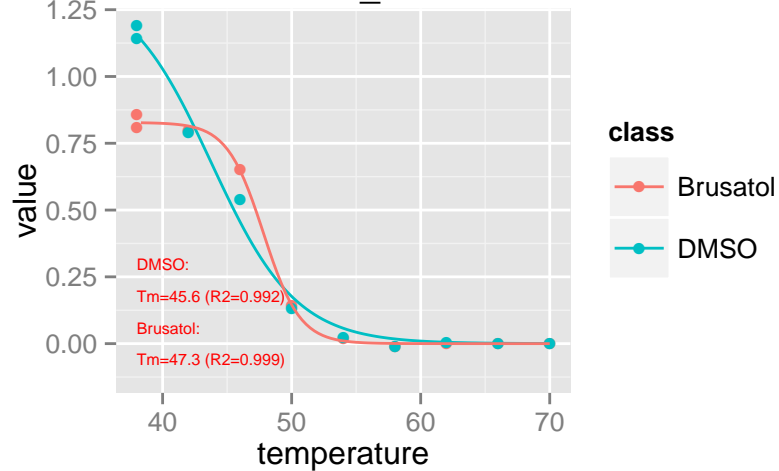

Prot: EIF3G\_HUMAN

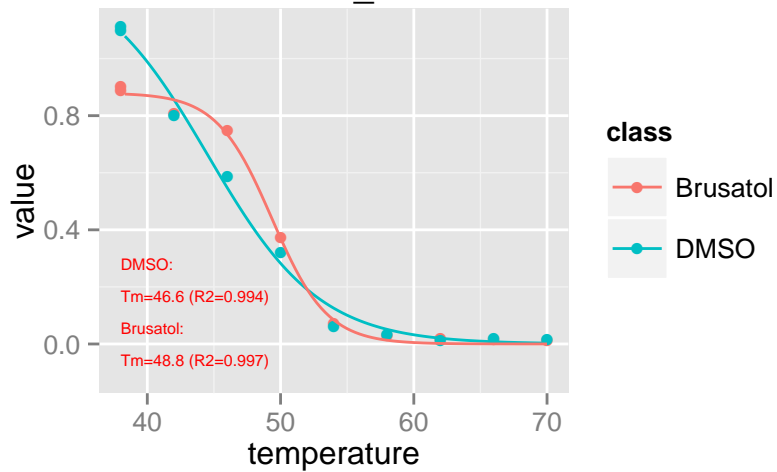

Prot: EIF3H\_HUMAN

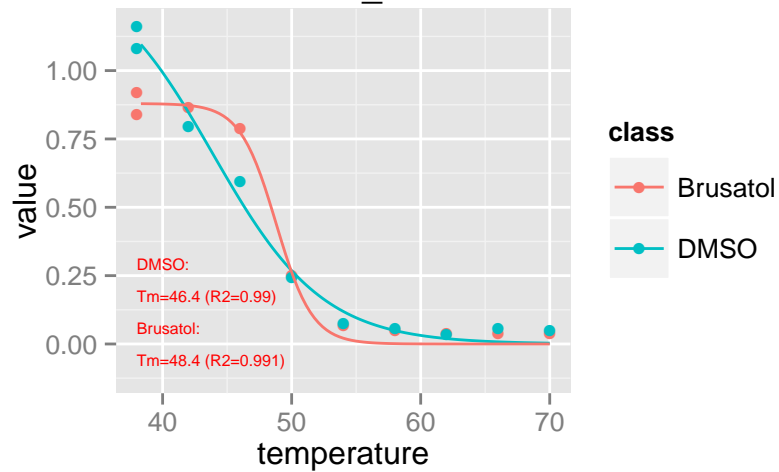

Prot: EIF3I\_HUMAN

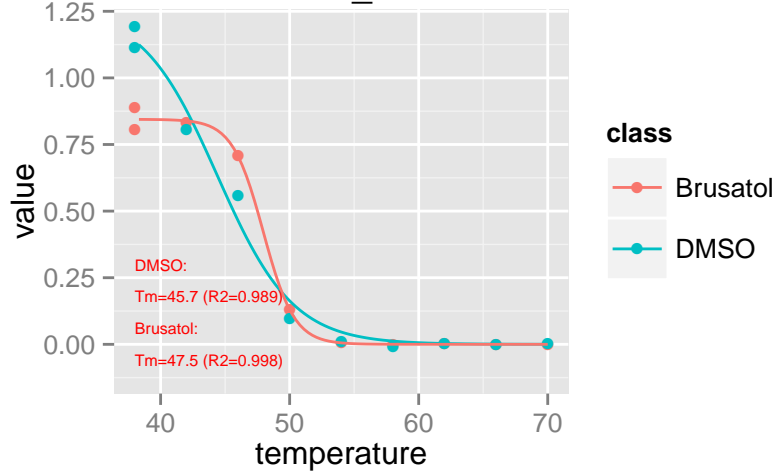

Prot: EIF3J\_HUMAN

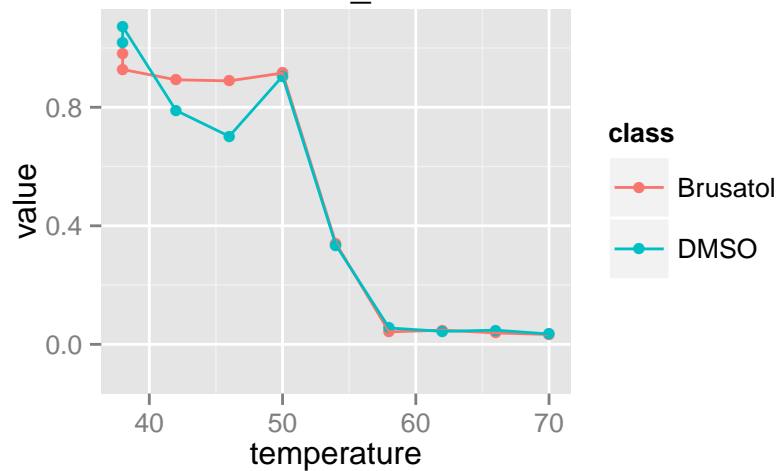

Prot: EIF3K\_HUMAN

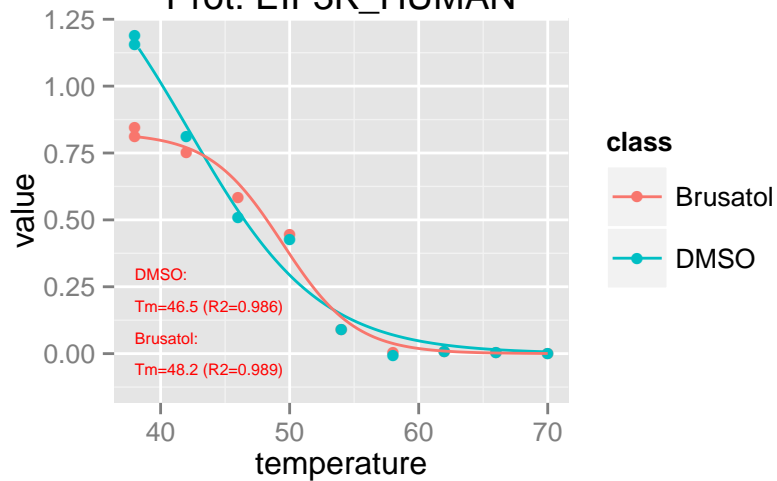

Prot: EIF3L\_HUMAN

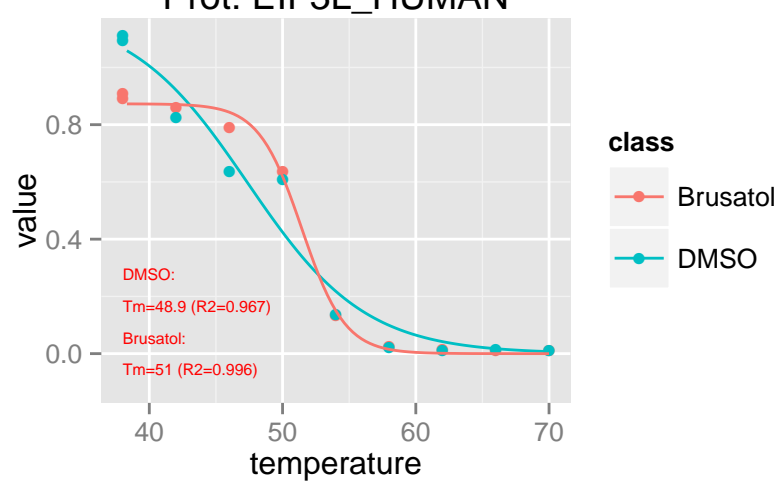

Prot: EIF3M\_HUMAN

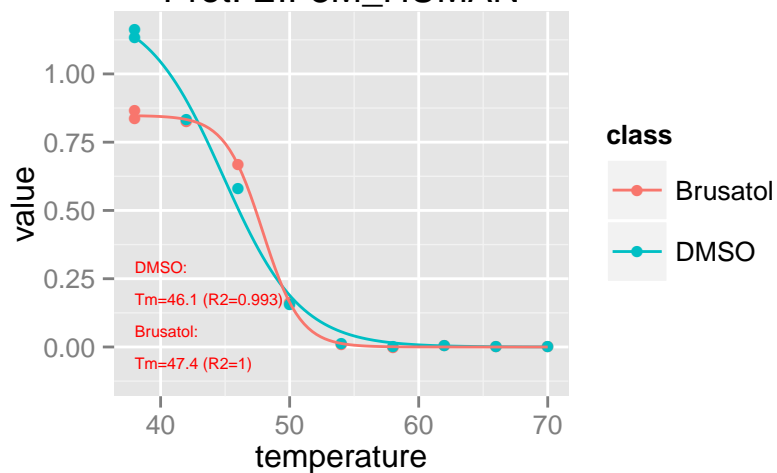

Prot: EKI1\_HUMAN

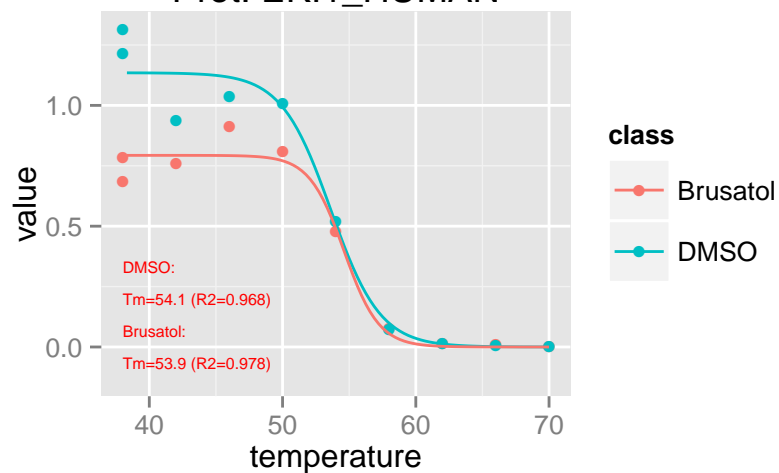

Prot: ELAV1\_HUMAN

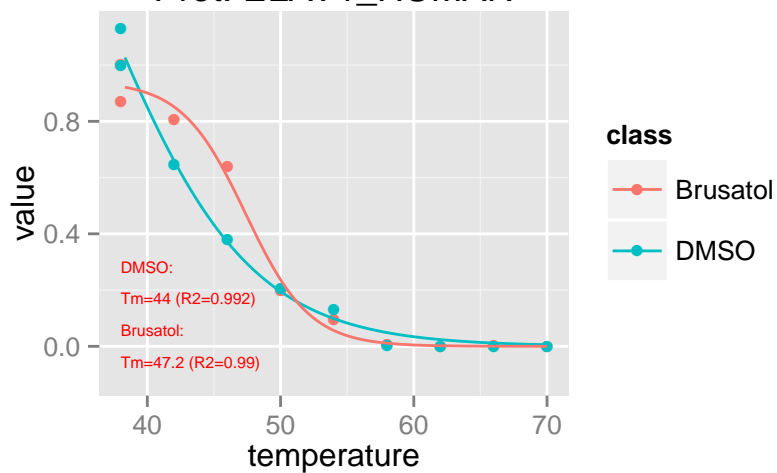

Prot: ELMO1\_HUMAN

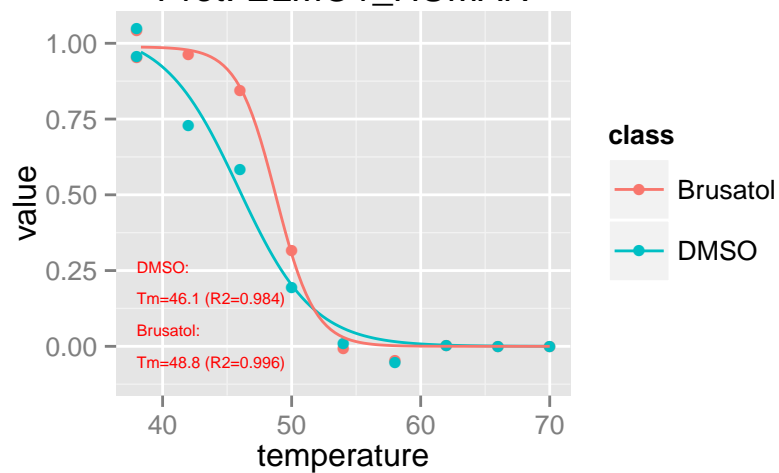

Prot: ELMO2\_HUMAN

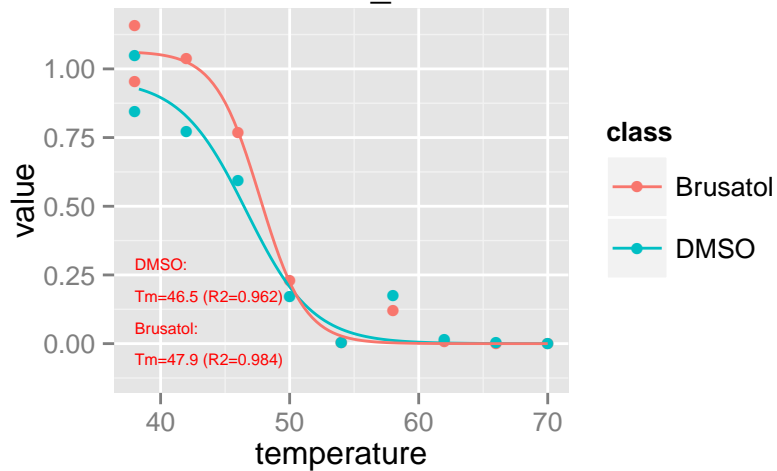

Prot: ELOB\_HUMAN

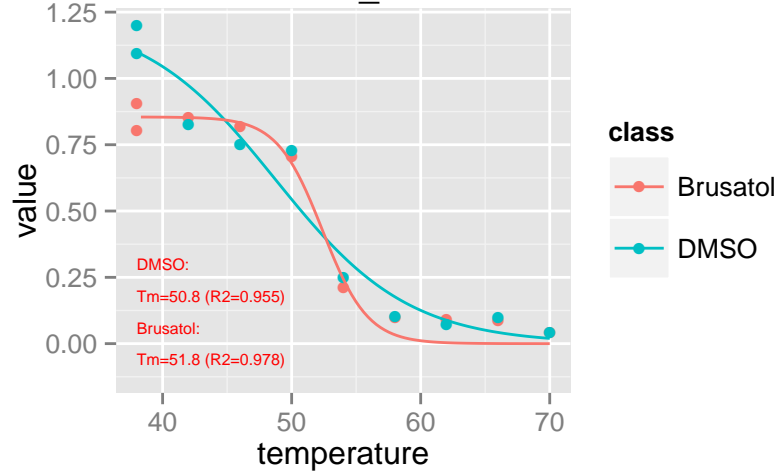

Prot: ELOC\_HUMAN

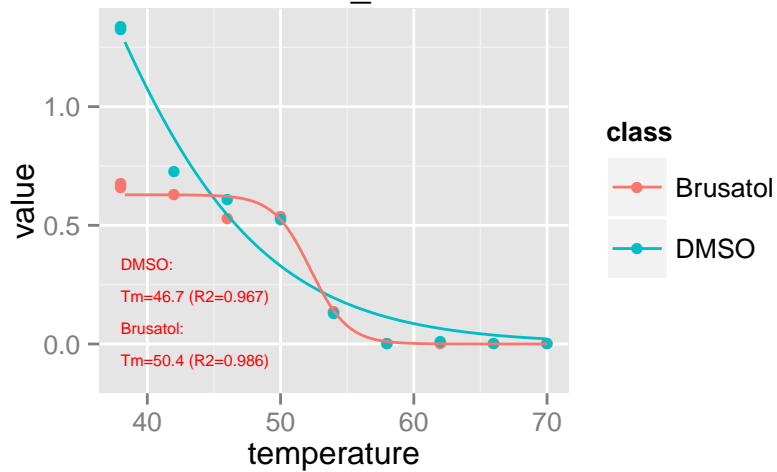

Prot: ELOF1\_HUMAN

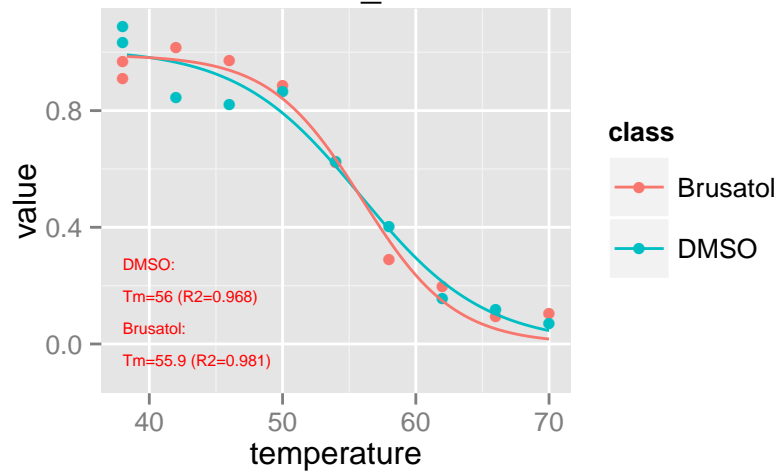

Prot: ELP1\_HUMAN

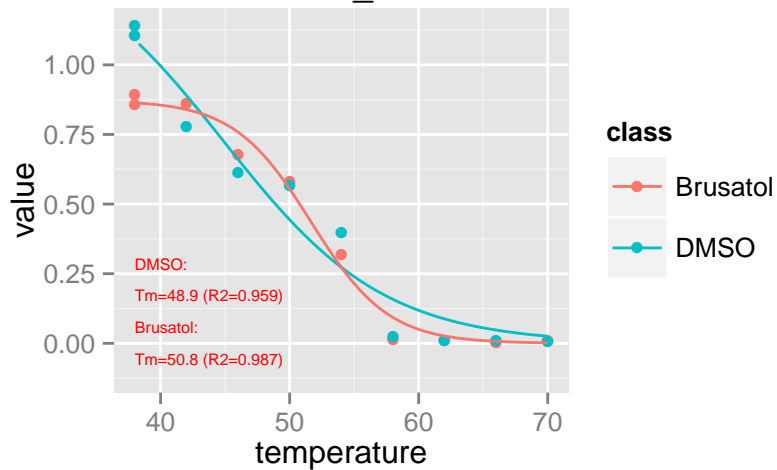

Prot: ELP2\_HUMAN

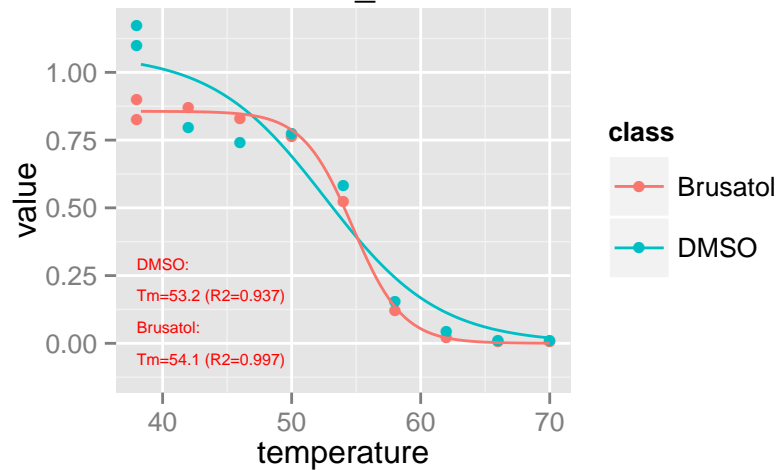

Prot: ELP3\_HUMAN

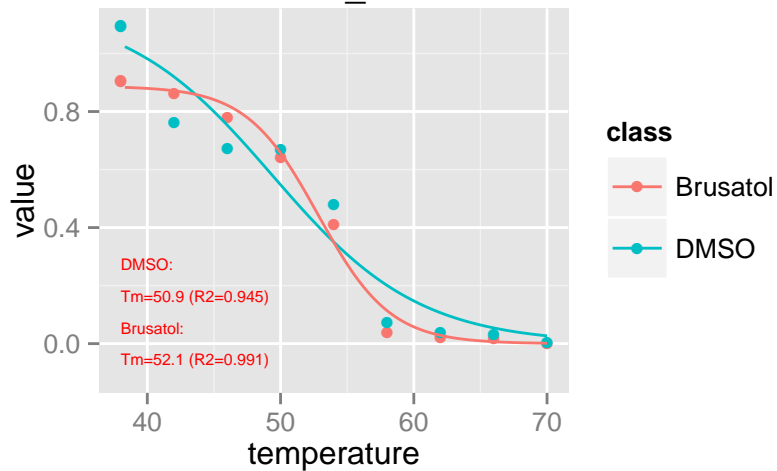

Prot: ELP4\_HUMAN

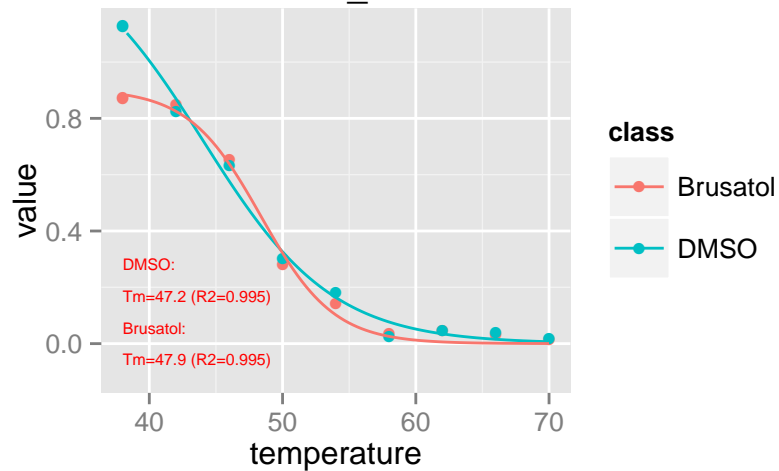

Prot: EMAL1\_HUMAN

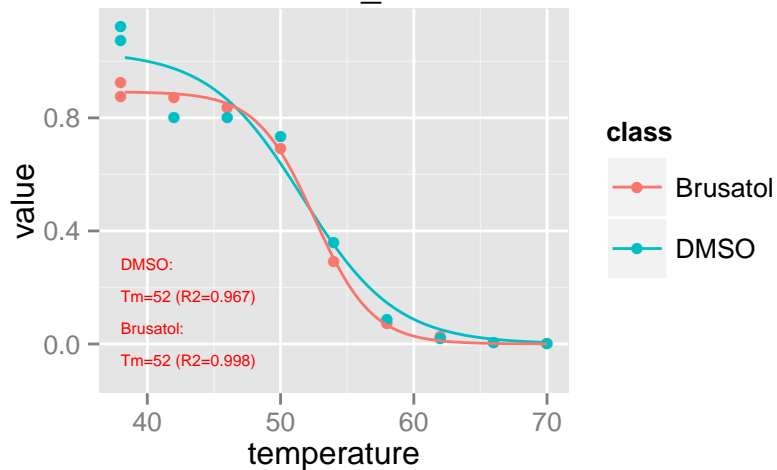

Prot: EMAL2\_HUMAN

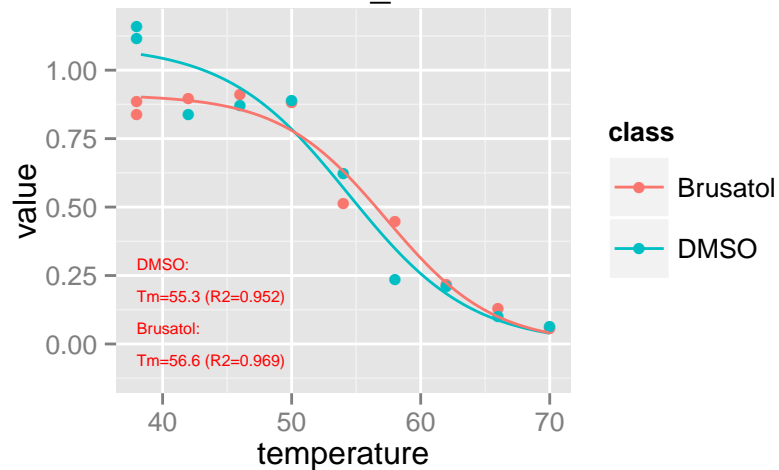

Prot: EMAL3\_HUMAN

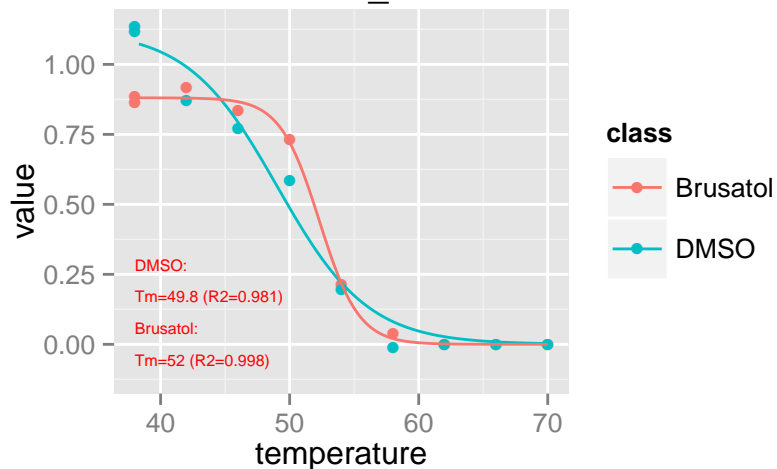

Prot: EMAL4\_HUMAN

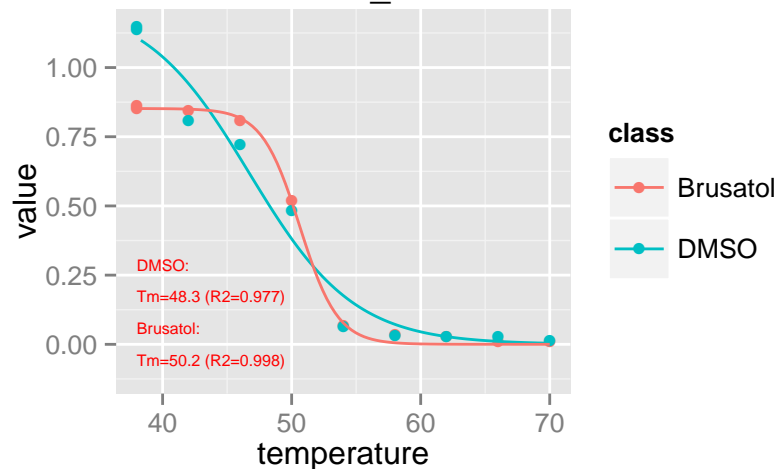



Prot: ENAH\_HUMAN

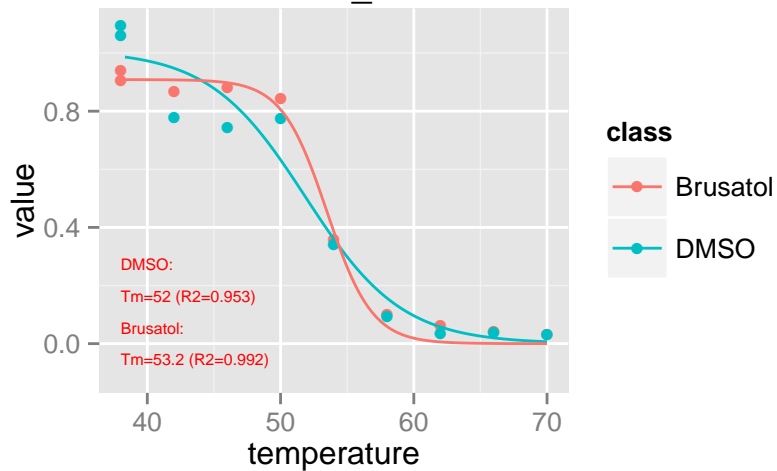

Prot: ENOA\_HUMAN

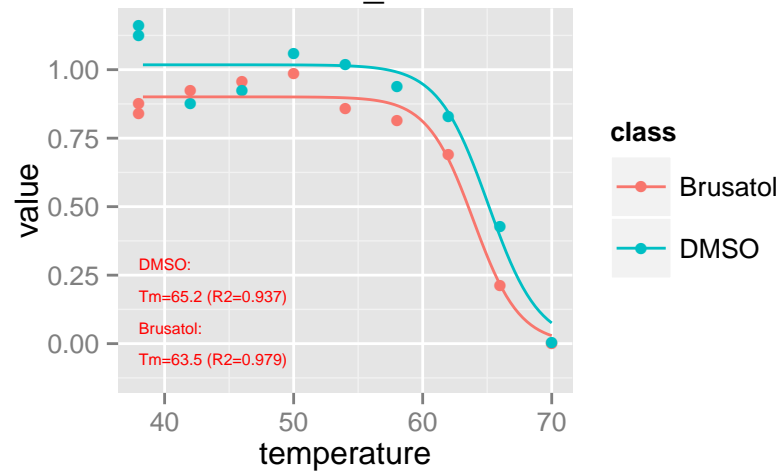

Prot: ENOB\_HUMAN

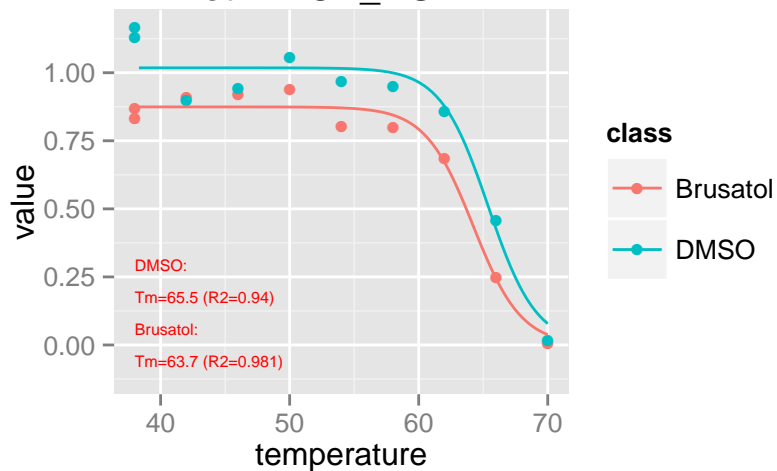

Prot: ENOF1\_HUMAN

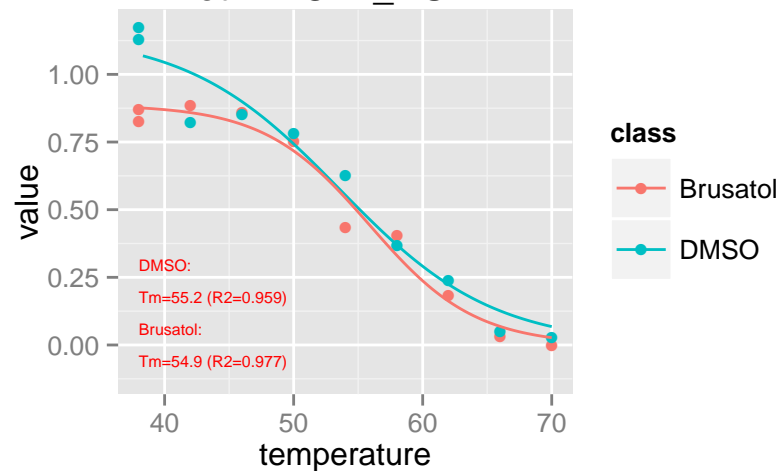

Prot: ENOG\_HUMAN

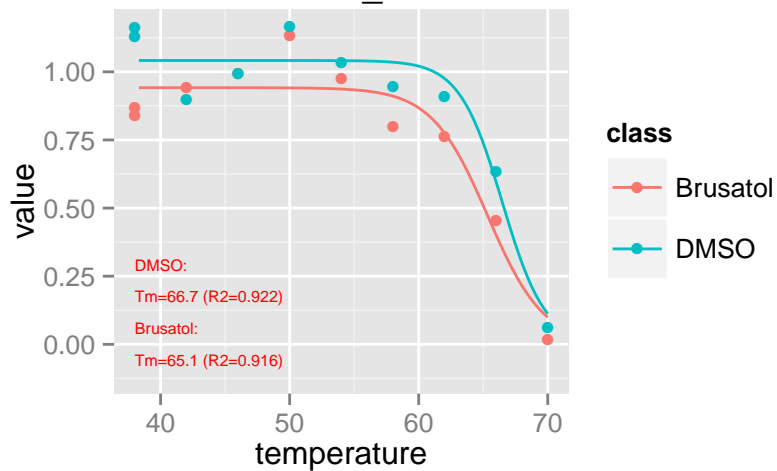

Prot: ENOPH\_HUMAN

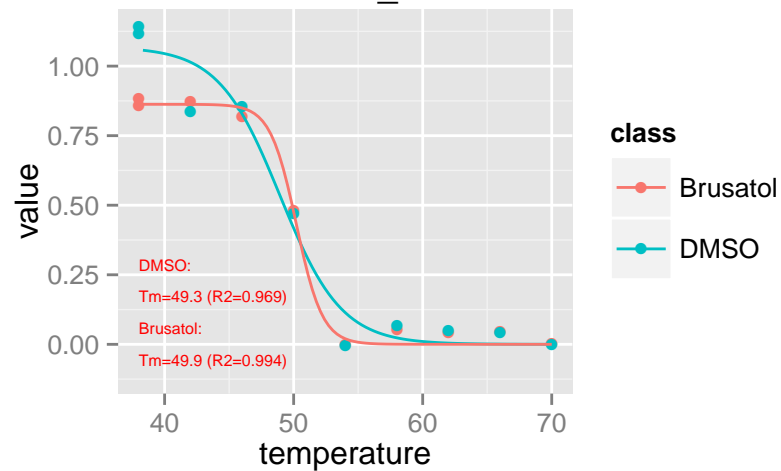

Prot: ENPL\_HUMAN

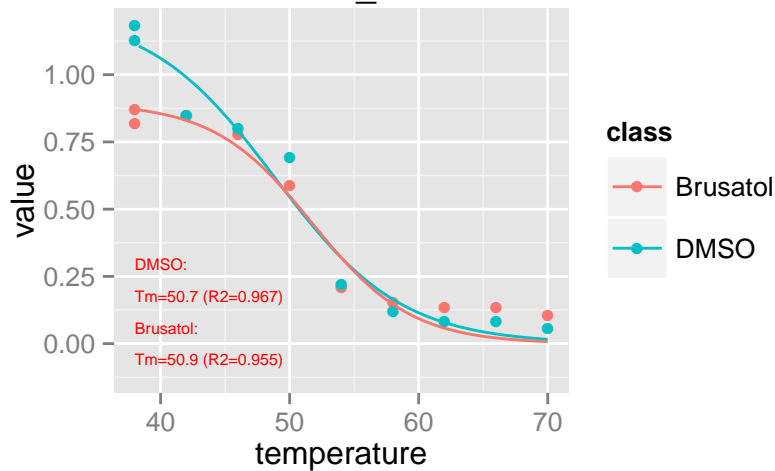

Prot: ENPLL\_HUMAN

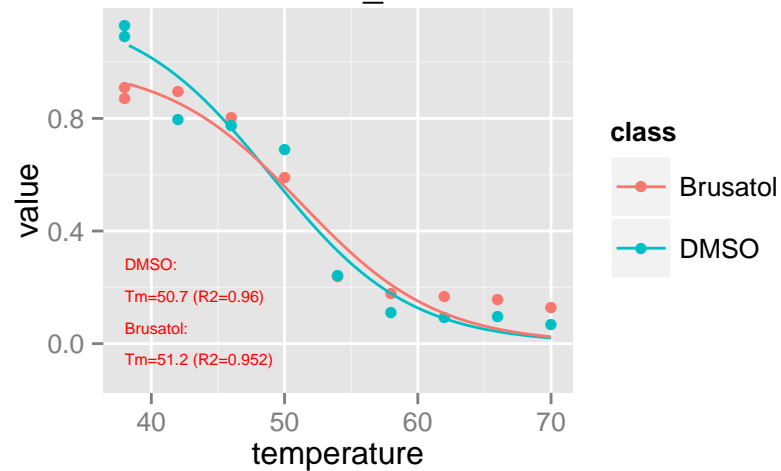

Prot: ENSA\_HUMAN

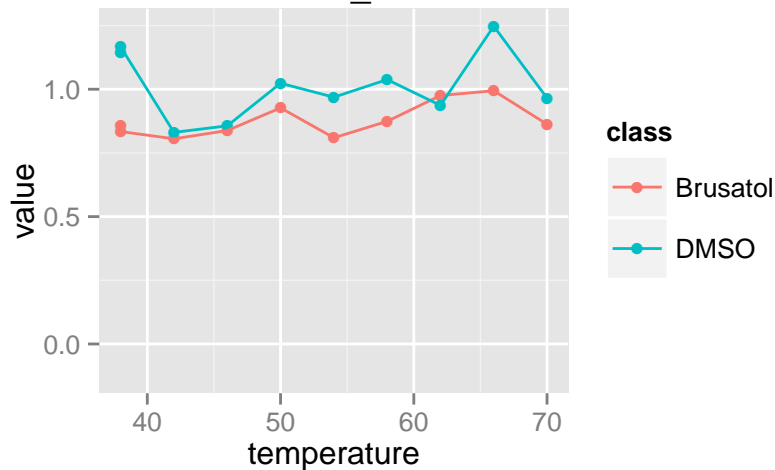

Prot: ENY2\_HUMAN

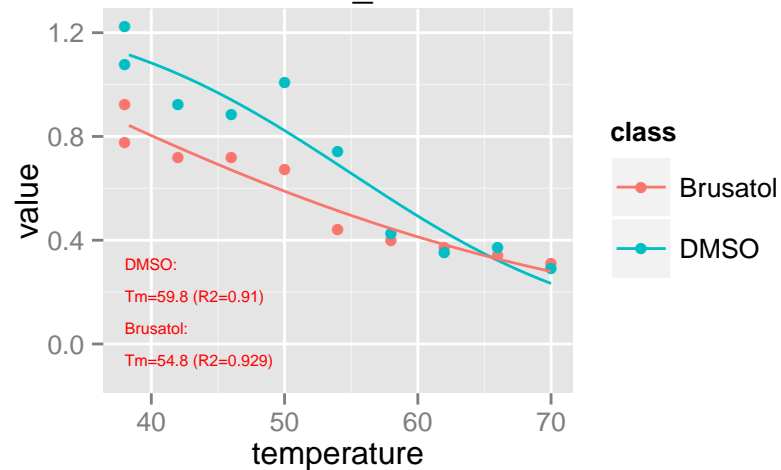

Prot: EP15R\_HUMAN

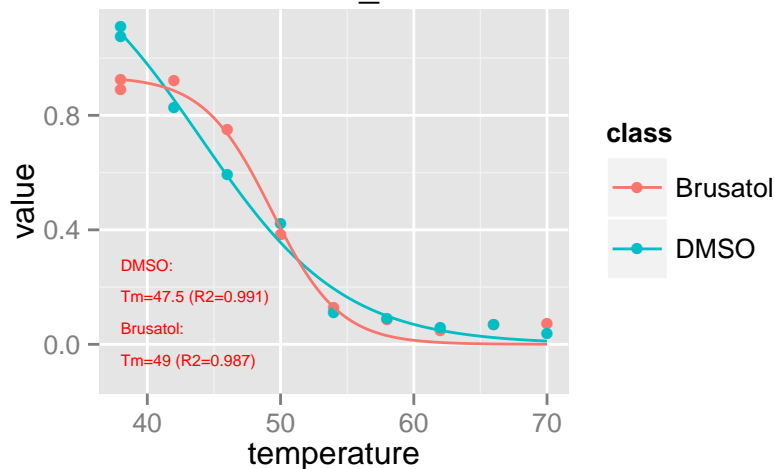

Prot: EPCR\_HUMAN

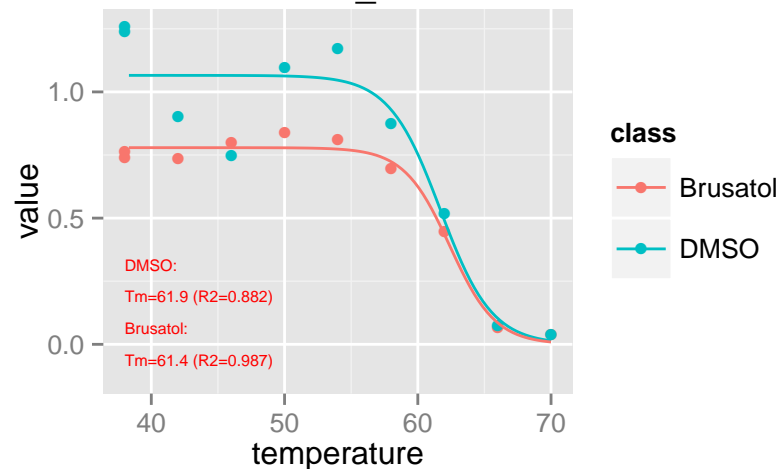

Prot: EPDR1\_HUMAN

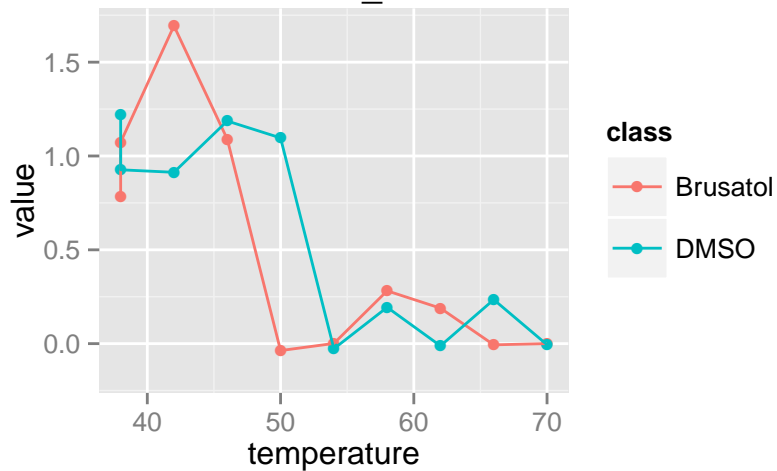

Prot: EPHB2\_HUMAN

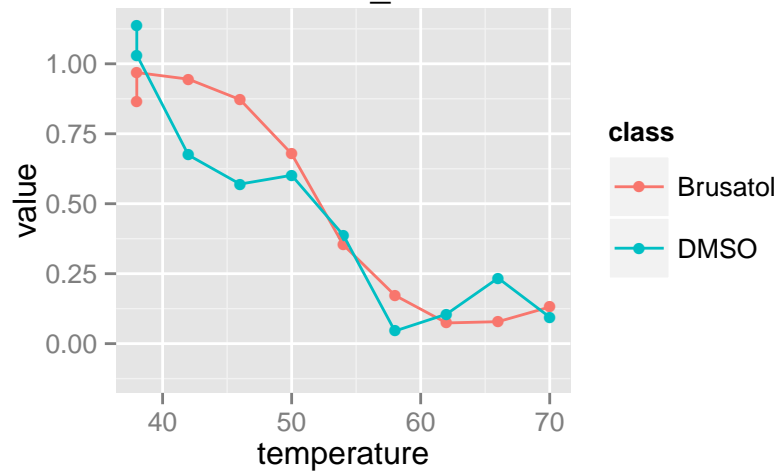

Prot: EPN1\_HUMAN

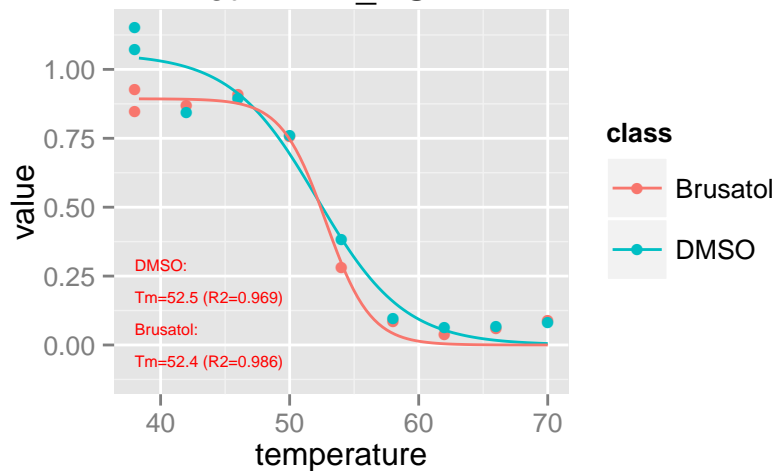

Prot: EPN2\_HUMAN

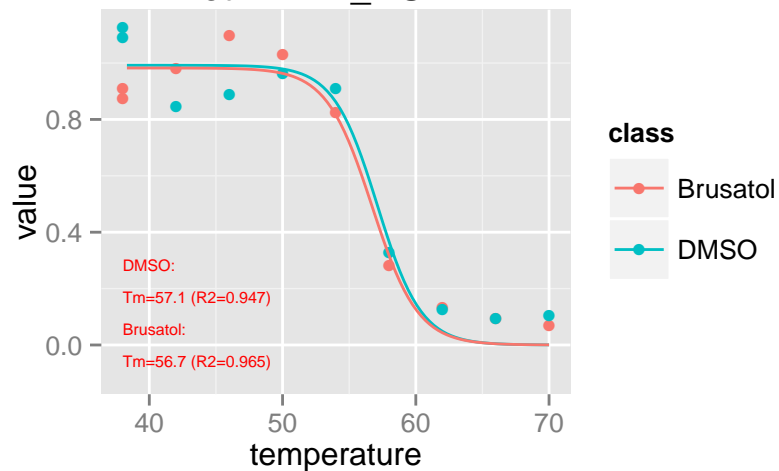

Prot: EPN4\_HUMAN

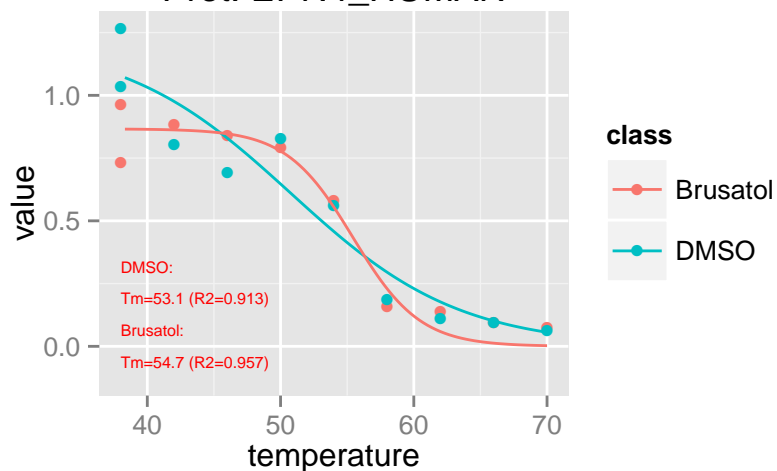

Prot: EPS15\_HUMAN

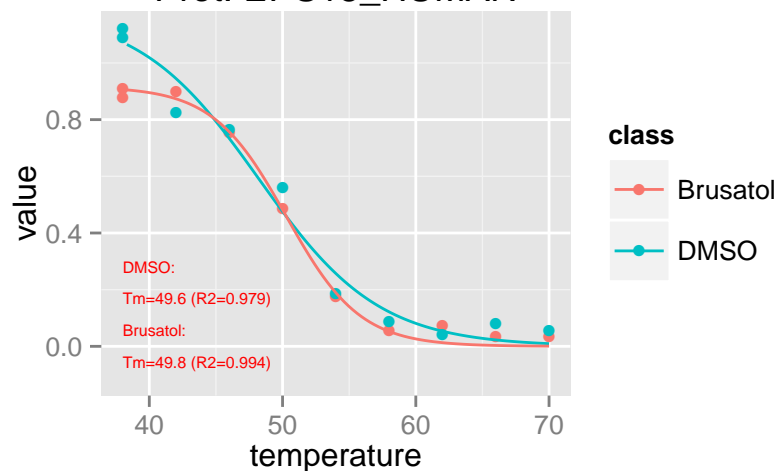

Prot: ERAP1\_HUMAN

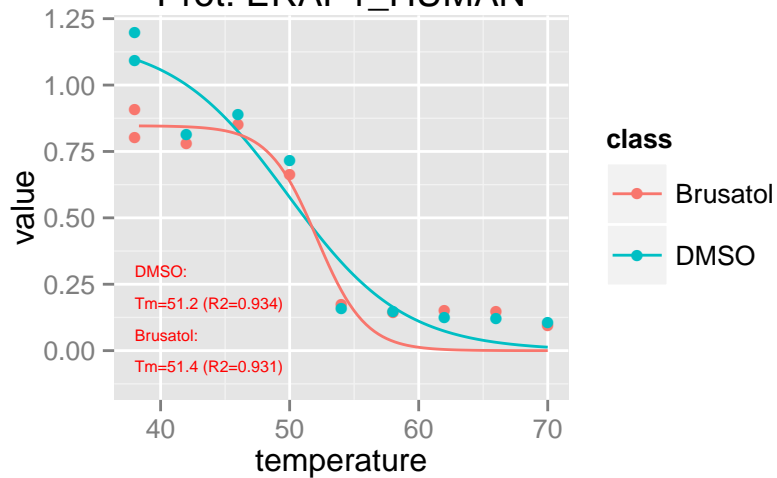

Prot: ERC2\_HUMAN

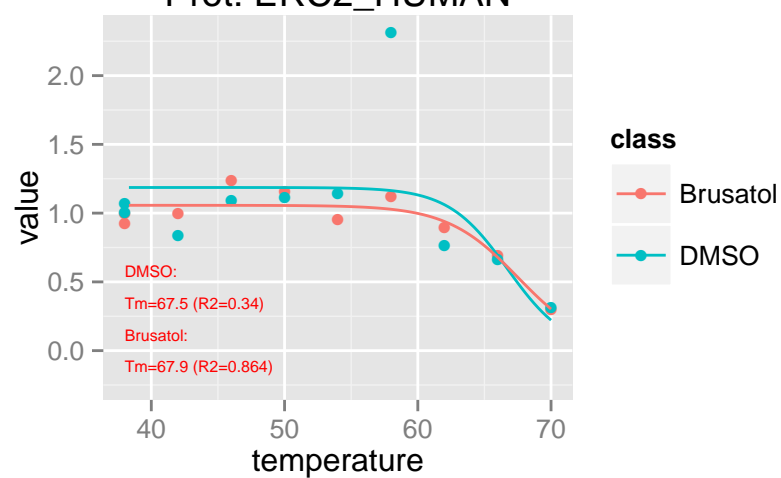

Prot: ERC6L\_HUMAN

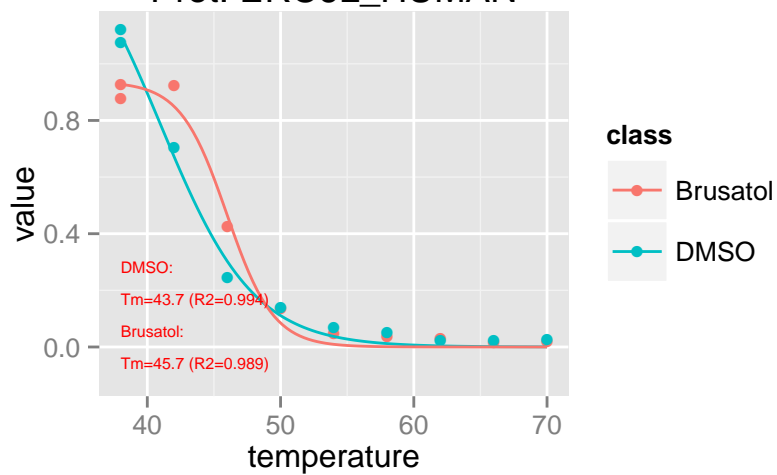

Prot: ERCC2\_HUMAN

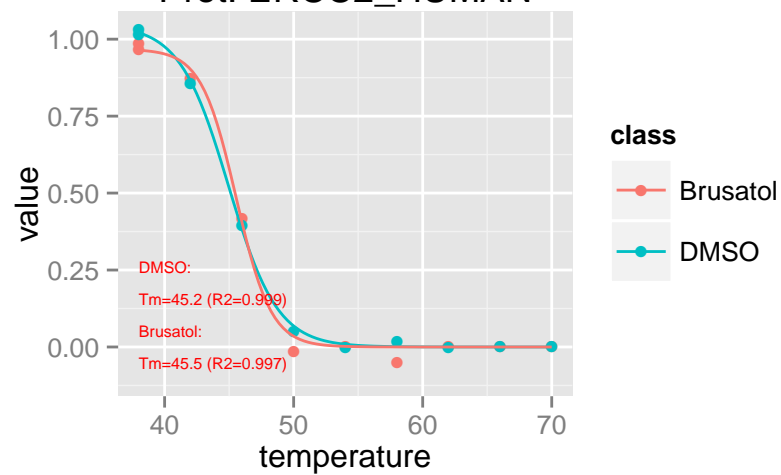

Prot: ERF\_HUMAN

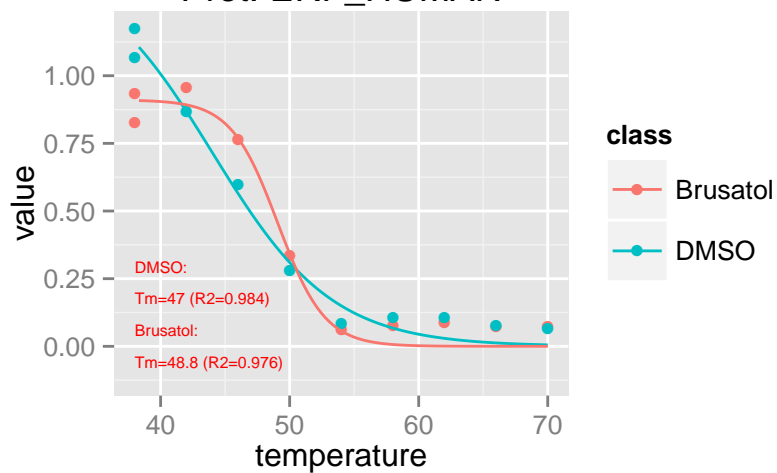

Prot: ERF1\_HUMAN

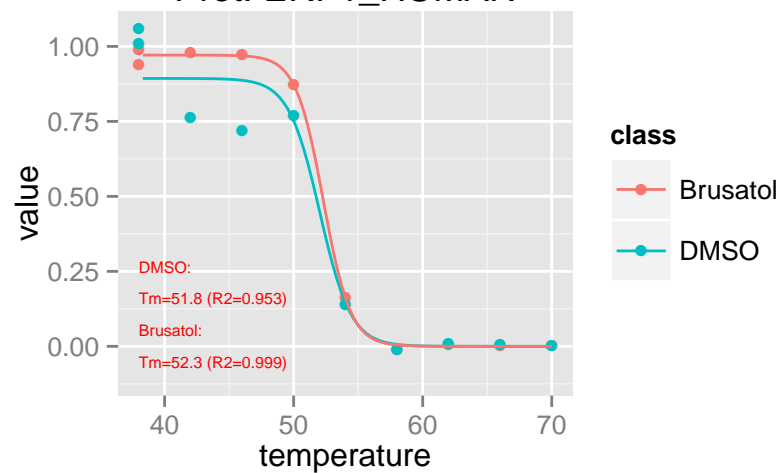

Prot: ERF3A\_HUMAN

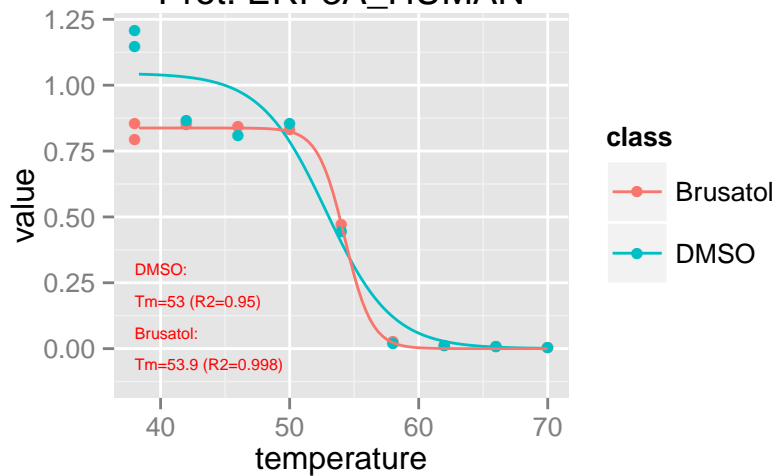

Prot: ERF3B\_HUMAN

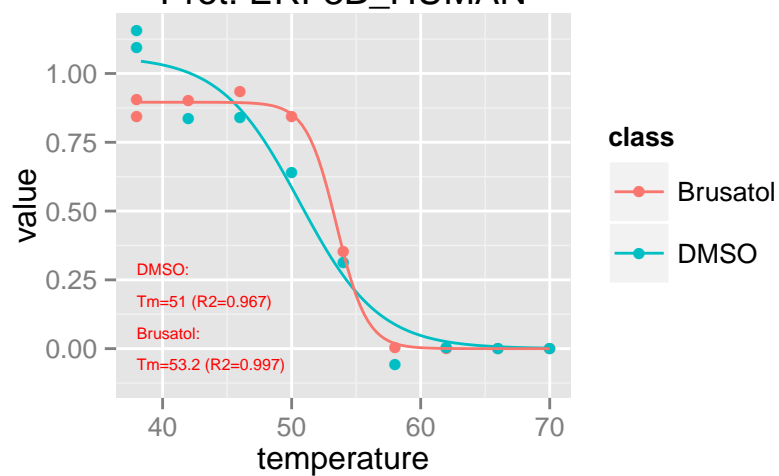

Prot: ERH\_HUMAN

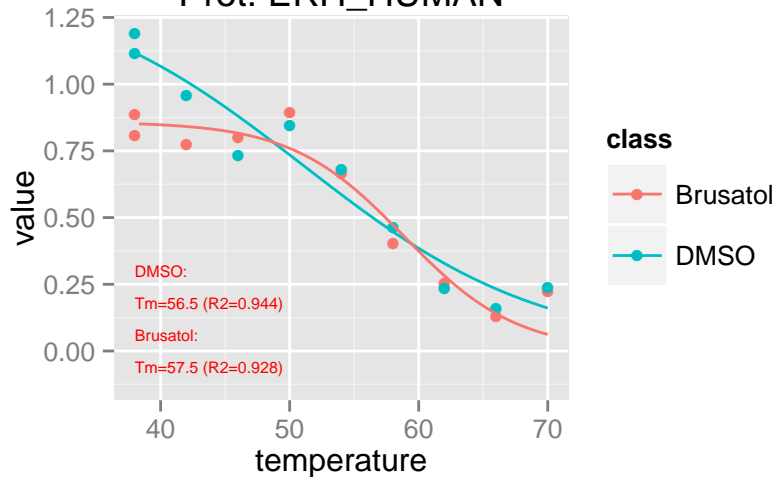

Prot: ERI1\_HUMAN

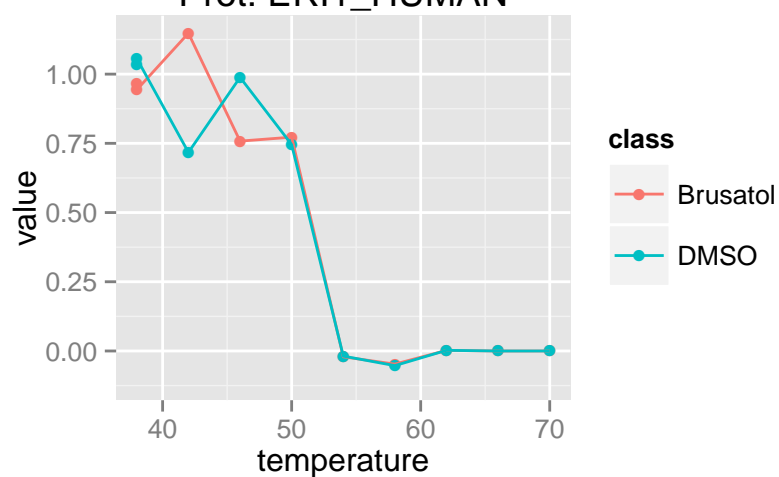

Prot: ERI3\_HUMAN

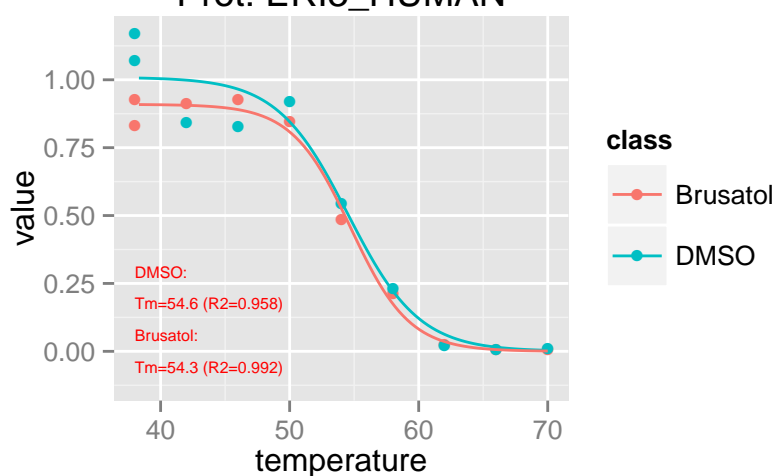

Prot: ERO1A\_HUMAN

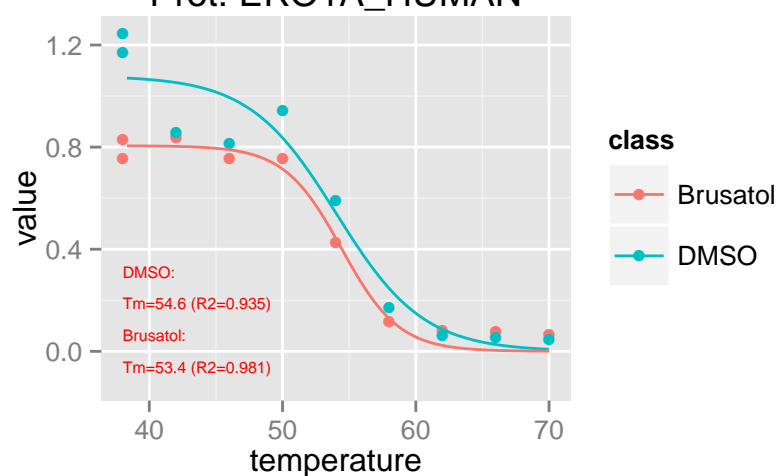

Prot: ERP29\_HUMAN

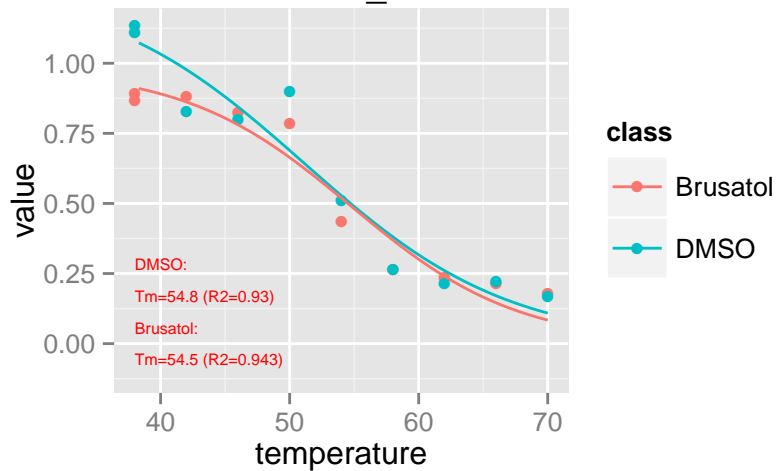

Prot: ERP44\_HUMAN

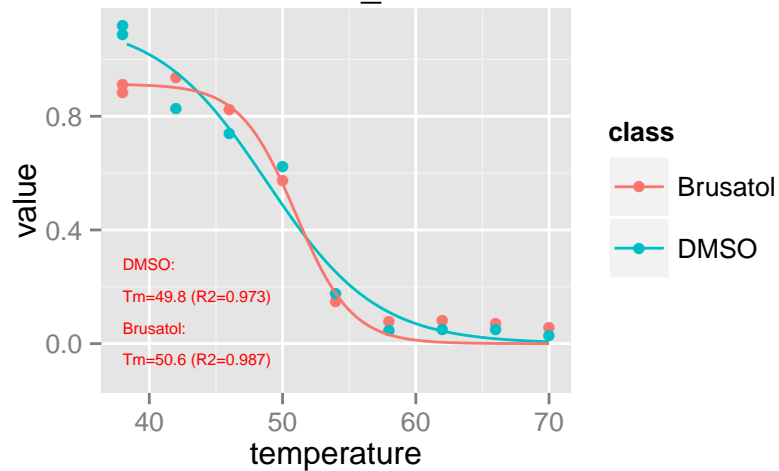

Prot: ES1\_HUMAN

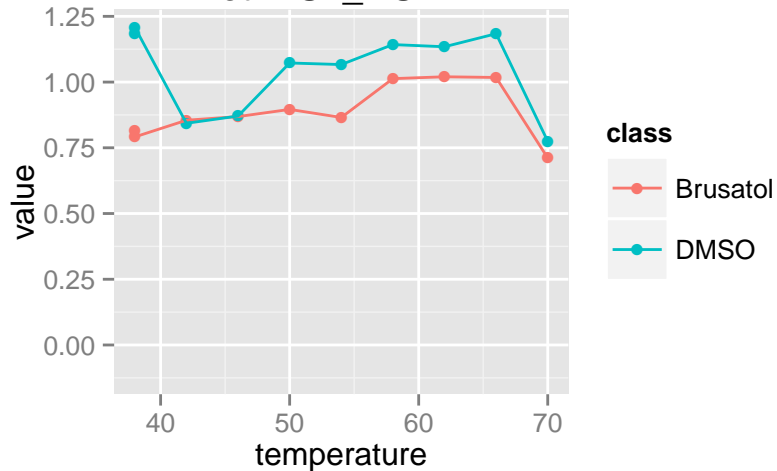

Prot: ES8L2\_HUMAN

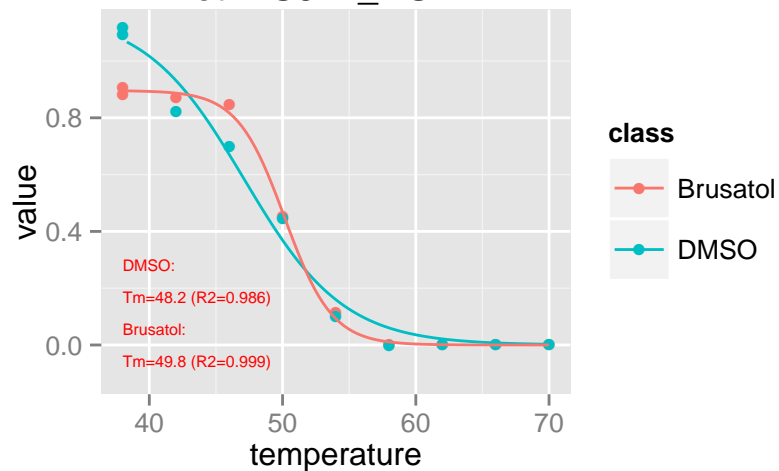

Prot: EST1\_HUMAN

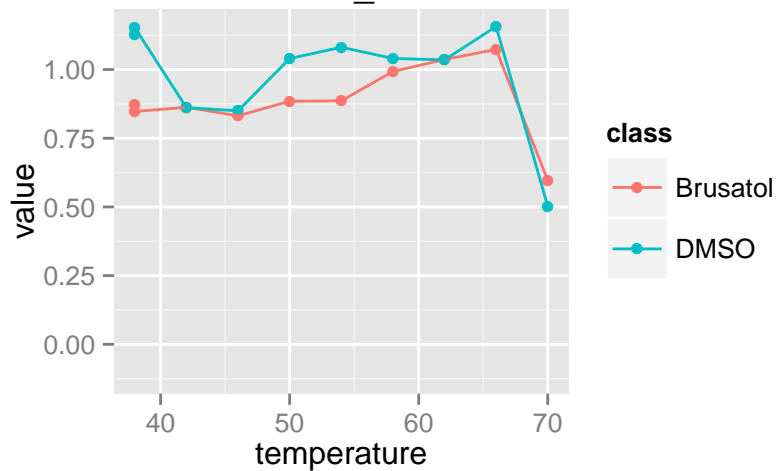

Prot: ESTD\_HUMAN

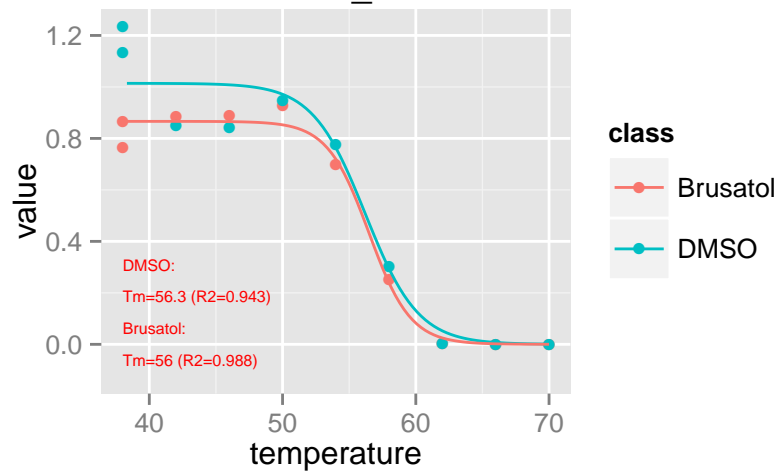

Prot: ESYT2\_HUMAN

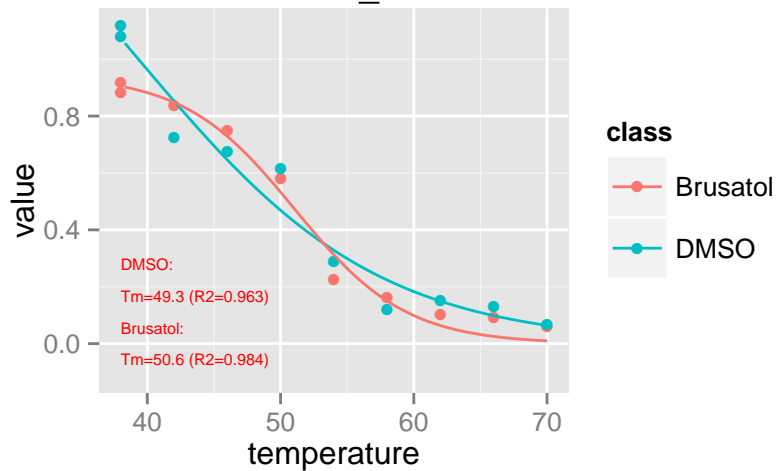

Prot: ETFA\_HUMAN

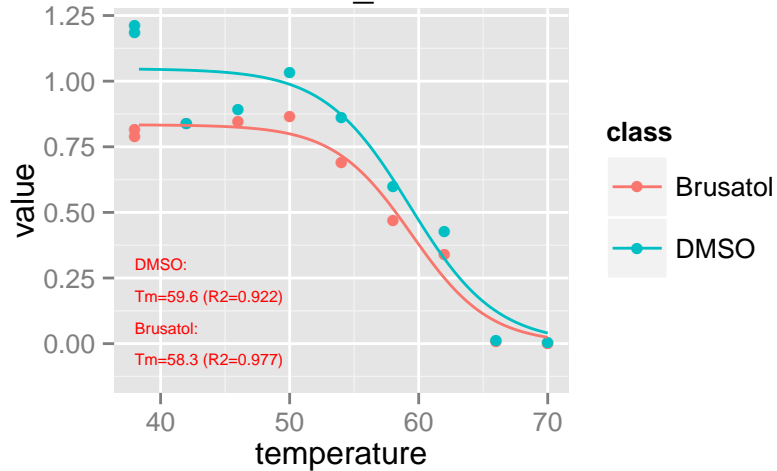

Prot: ETFB\_HUMAN

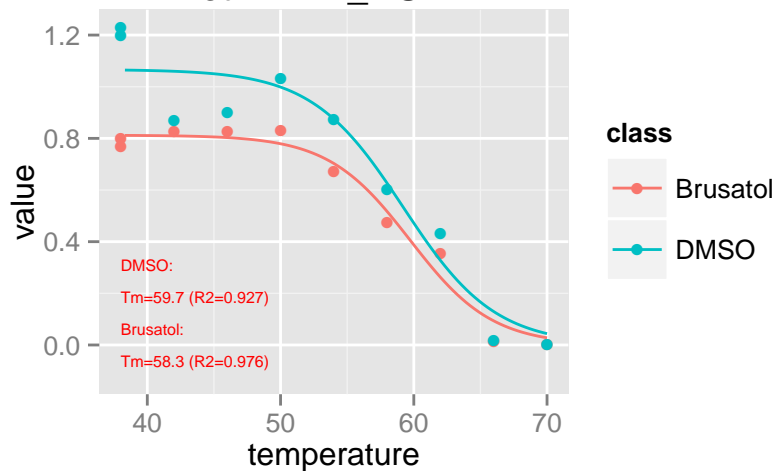

Prot: ETHE1\_HUMAN

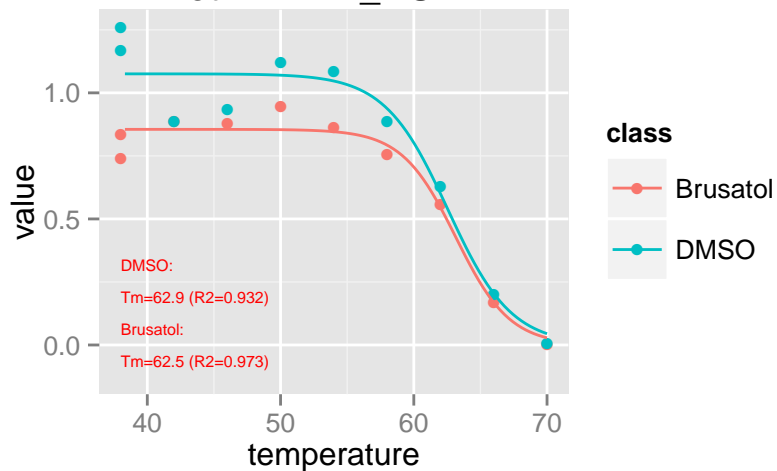

Prot: ETUD1\_HUMAN

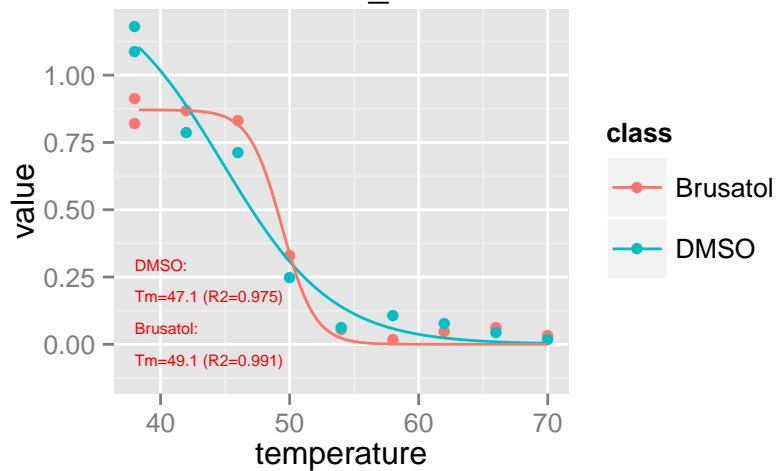

Prot: EWS\_HUMAN

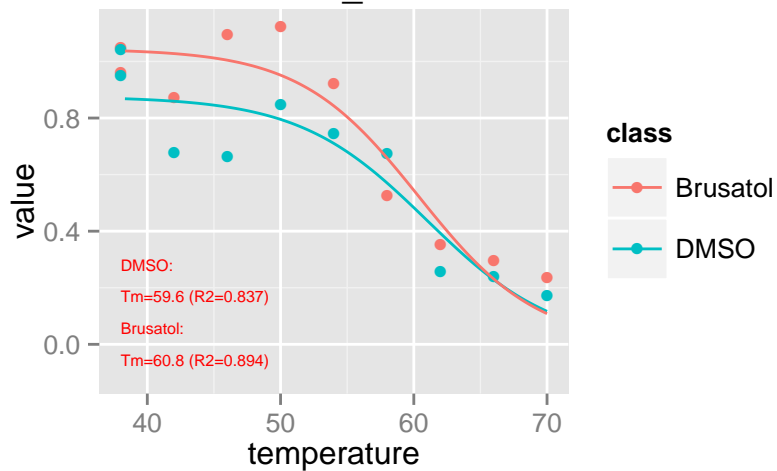

Prot: EXC6B\_HUMAN

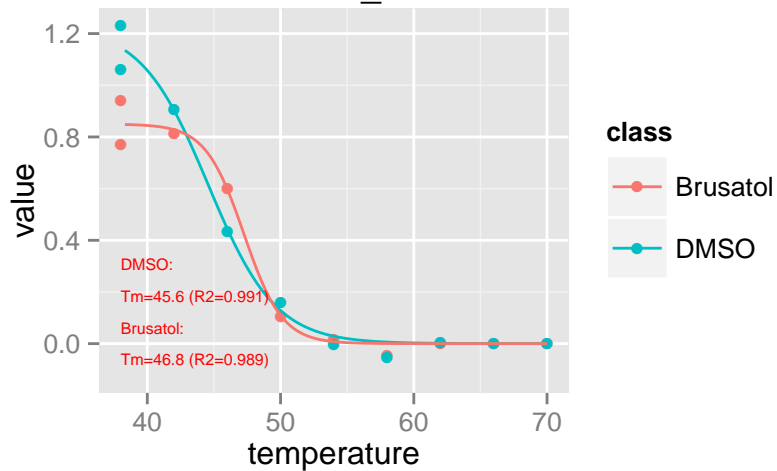

Prot: EXOC1\_HUMAN

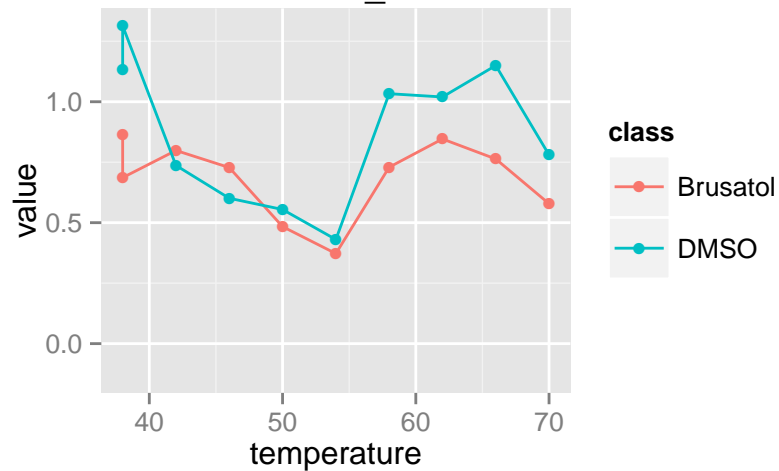

Prot: EXOC3\_HUMAN

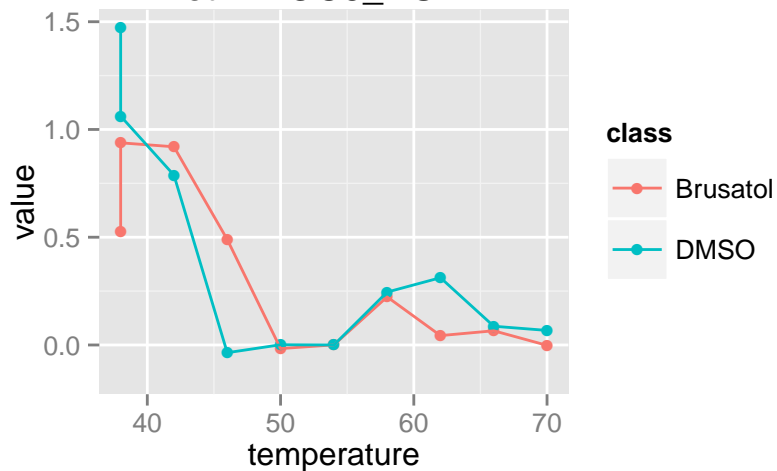

Prot: EXOC4\_HUMAN

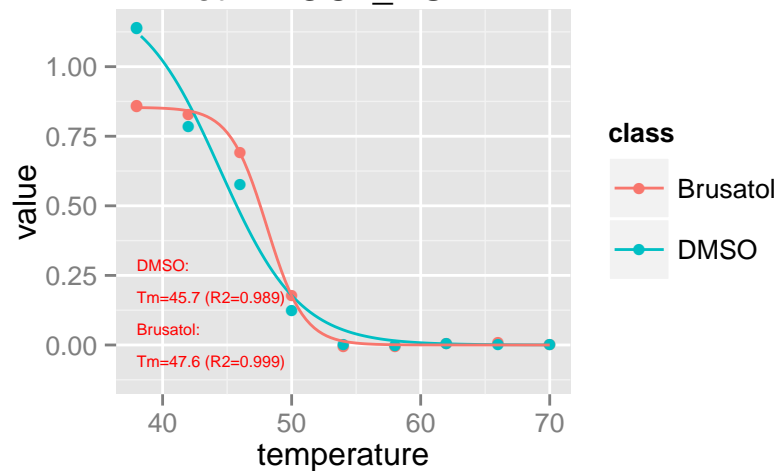

Prot: EXOC5\_HUMAN

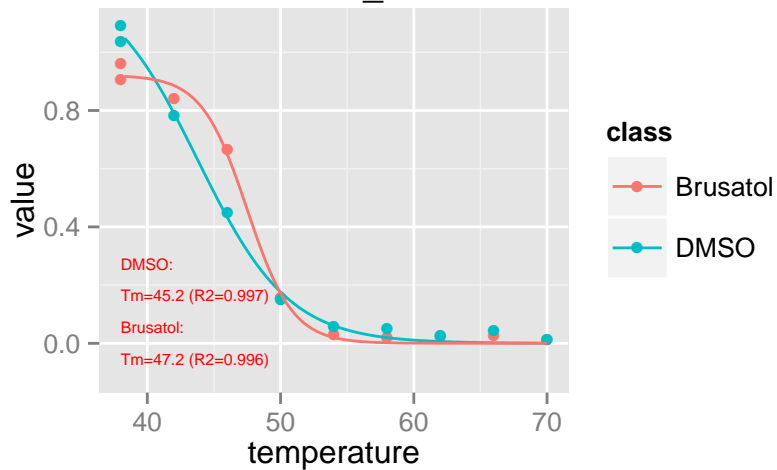

Prot: EXOC6\_HUMAN

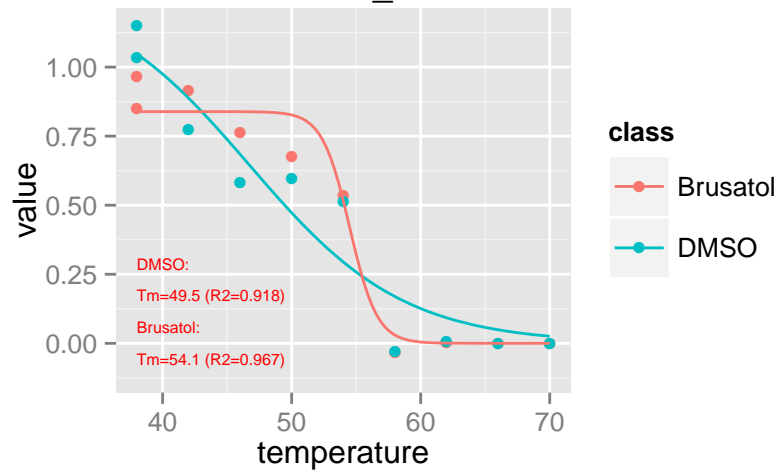



Prot: EXOC7\_HUMAN

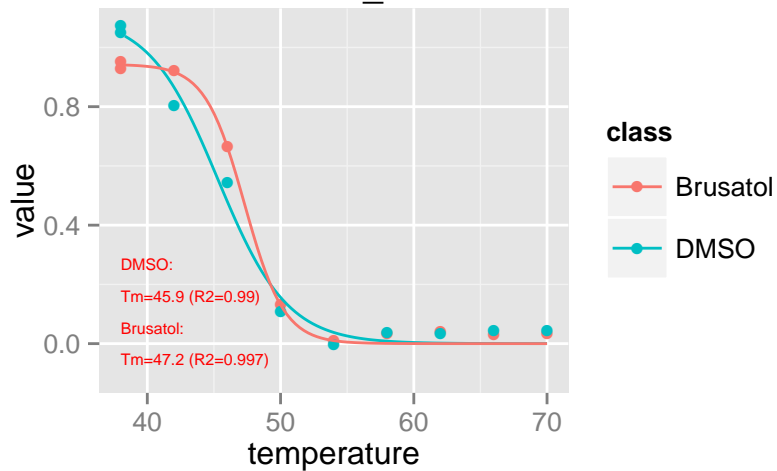

Prot: EXOC8\_HUMAN

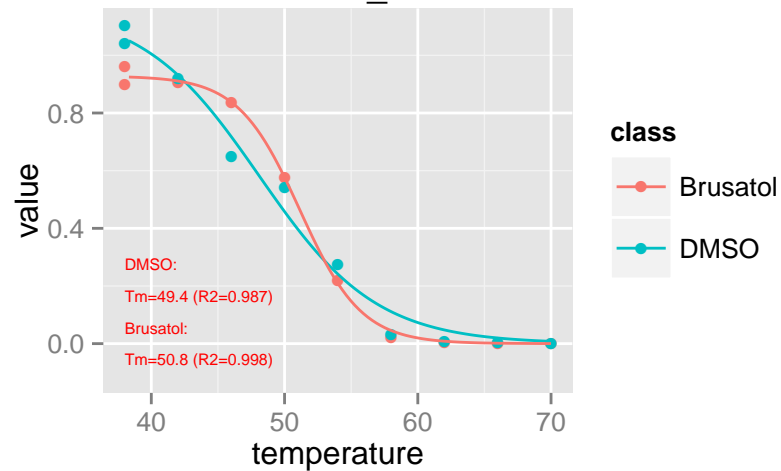

Prot: EXOS1\_HUMAN

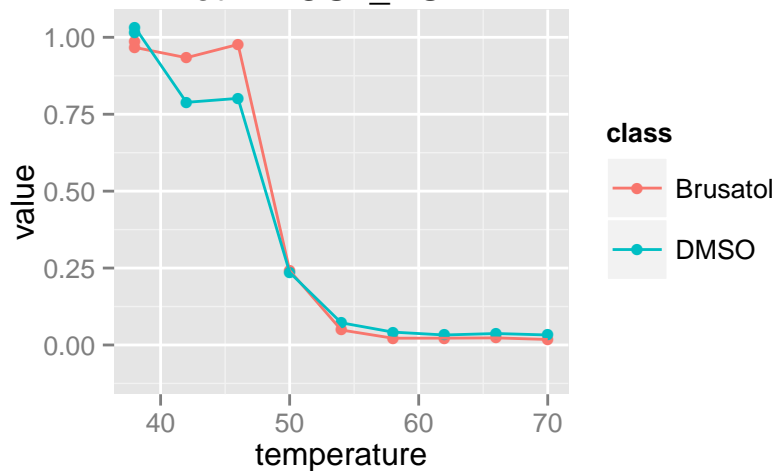

Prot: EXOS2\_HUMAN

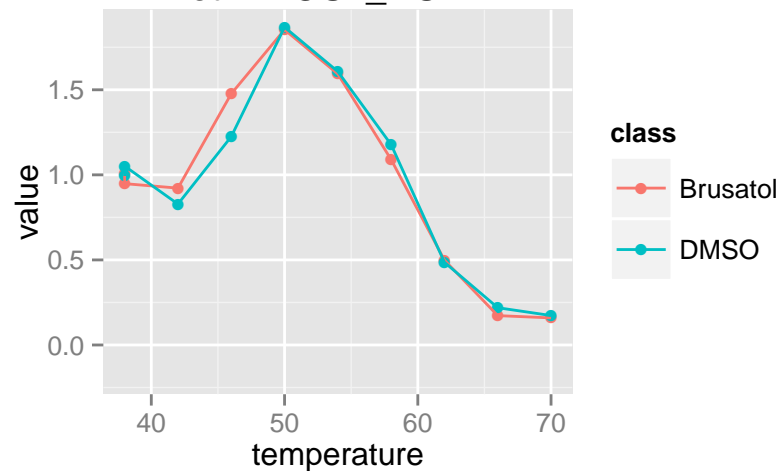

Prot: EXOS4\_HUMAN

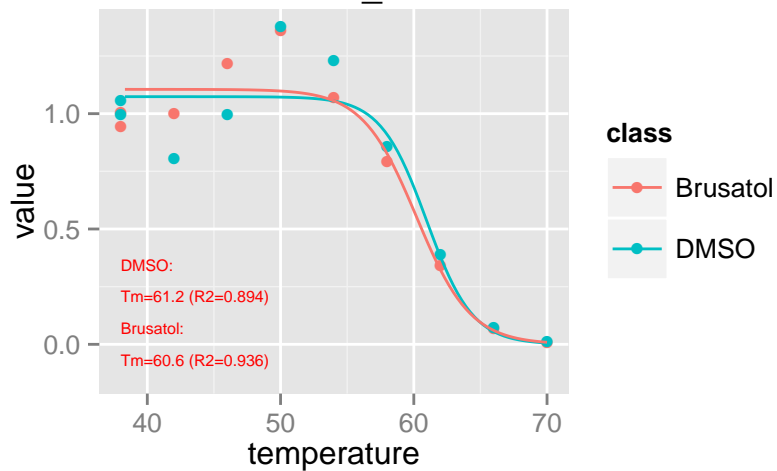

Prot: EXOS5\_HUMAN

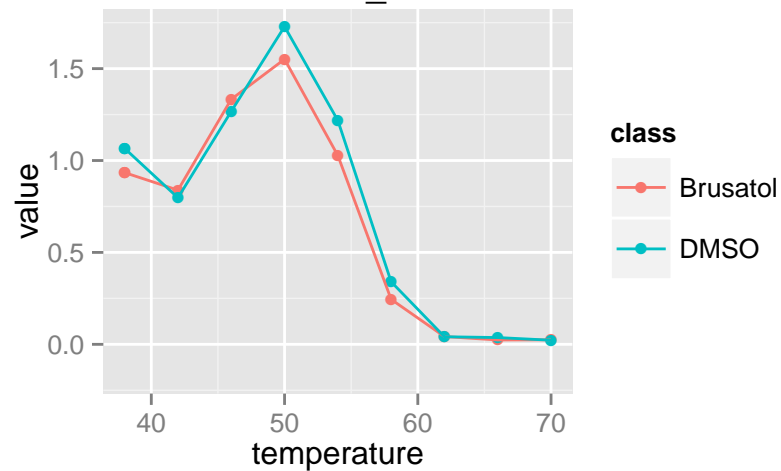

Prot: EXOS6\_HUMAN

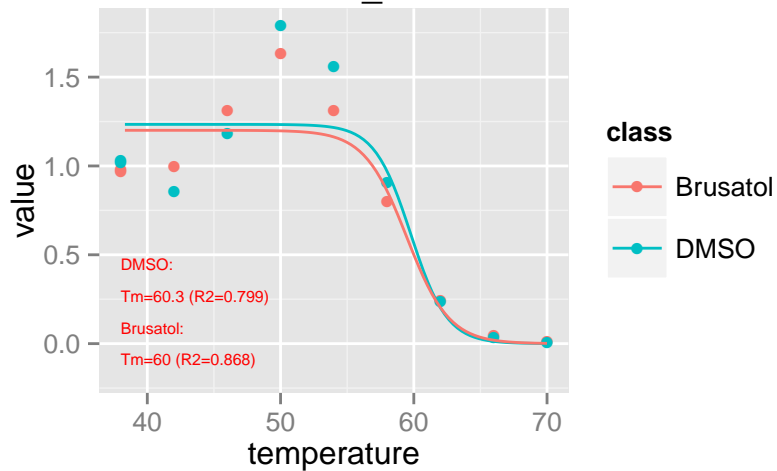

Prot: EXOS7\_HUMAN

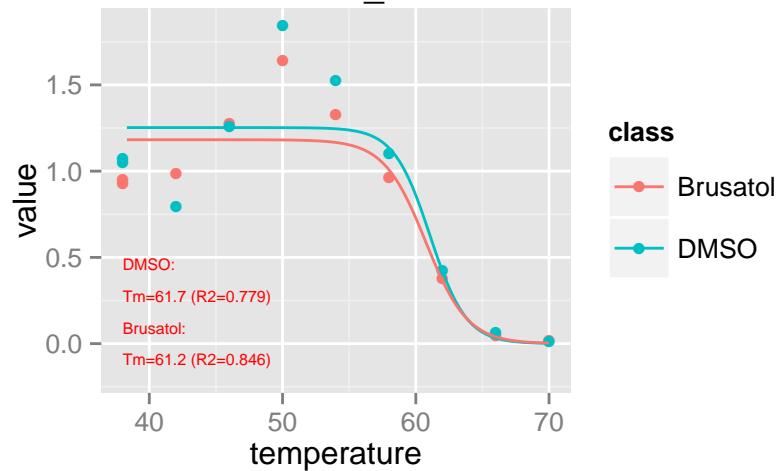

Prot: EXOS8\_HUMAN

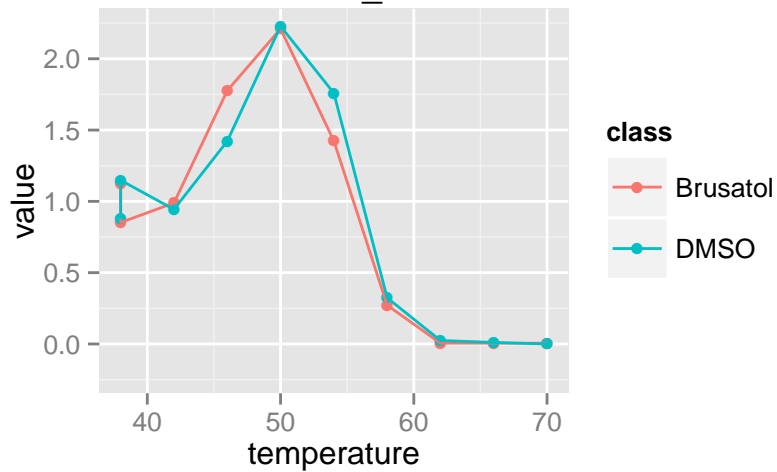

Prot: EXOS9\_HUMAN

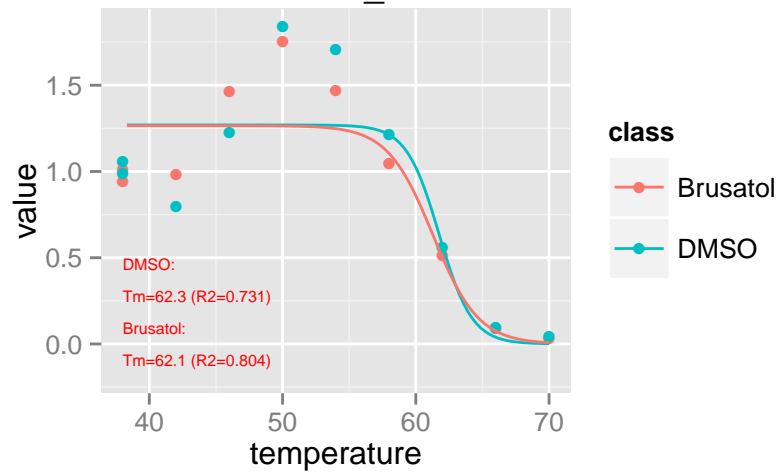

Prot: EXOSX\_HUMAN

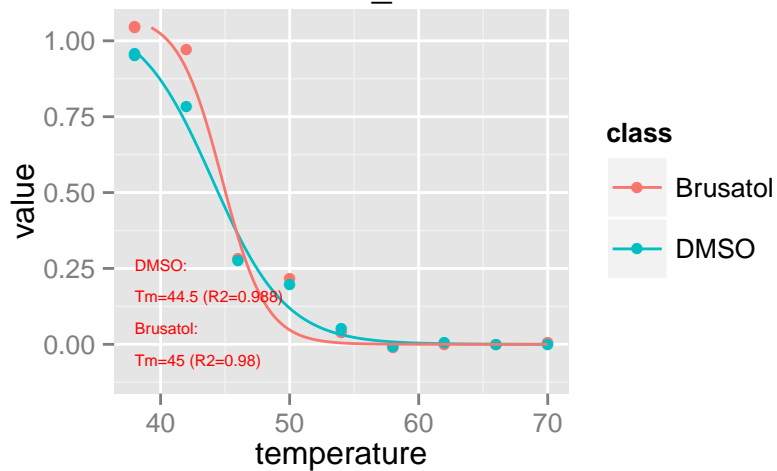

Prot: EZRI\_HUMAN

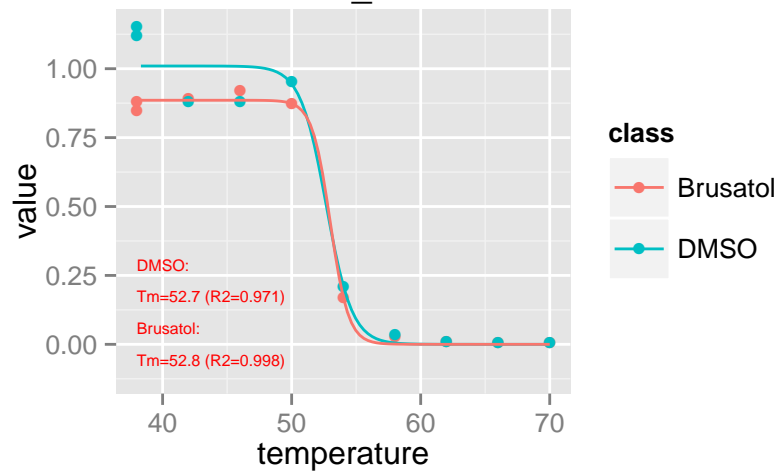

Prot: F107B\_HUMAN

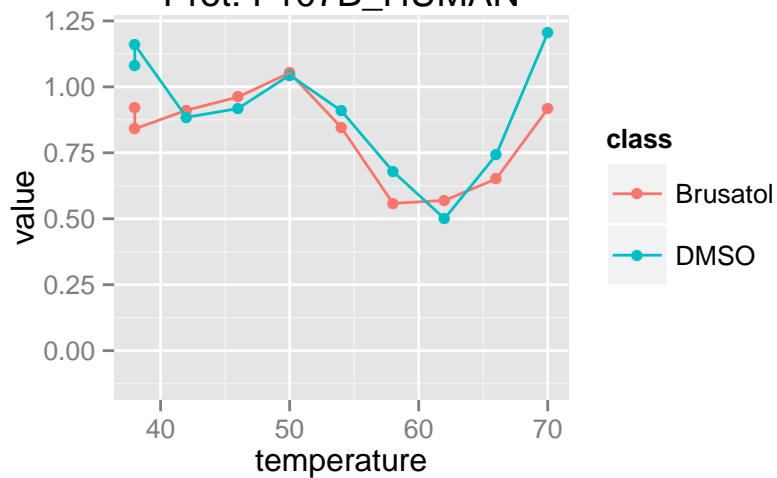

Prot: F10A1\_HUMAN

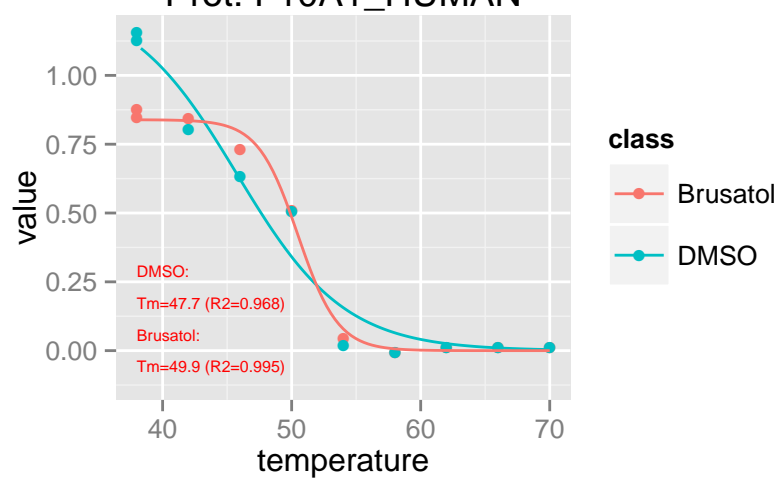

Prot: F1142\_HUMAN

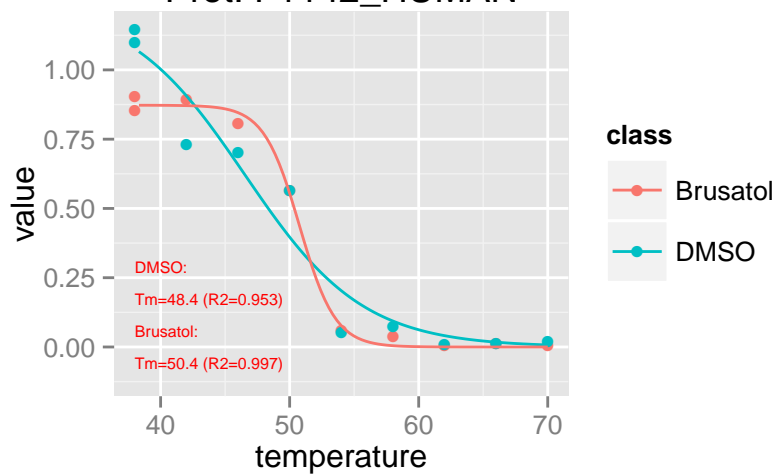

Prot: F115A\_HUMAN

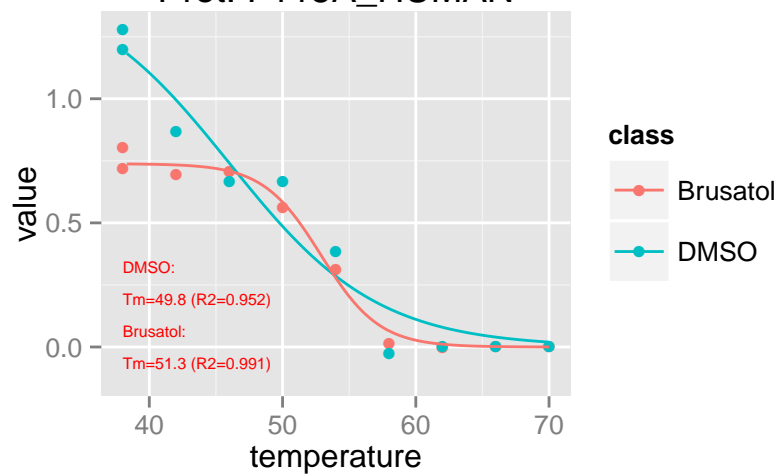

Prot: F120A\_HUMAN

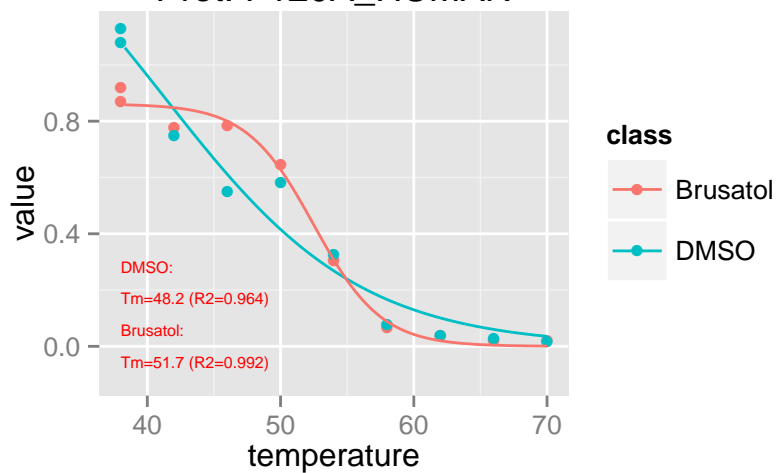

Prot: F125A\_HUMAN

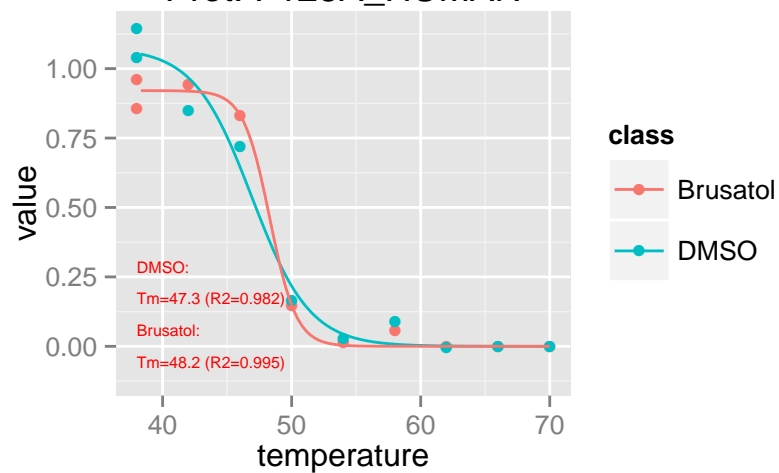

Prot: F136A\_HUMAN

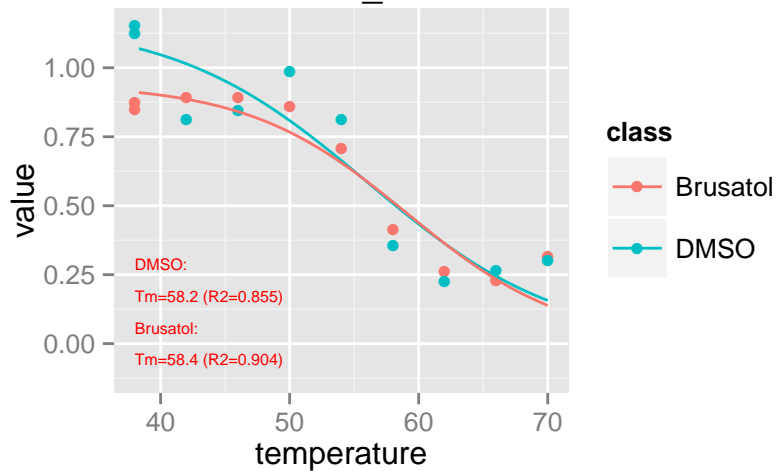

Prot: F164A\_HUMAN

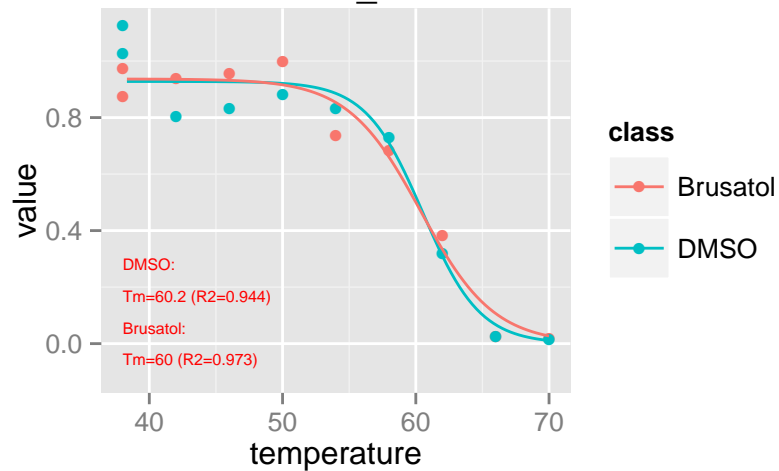

Prot: F16B1\_HUMAN

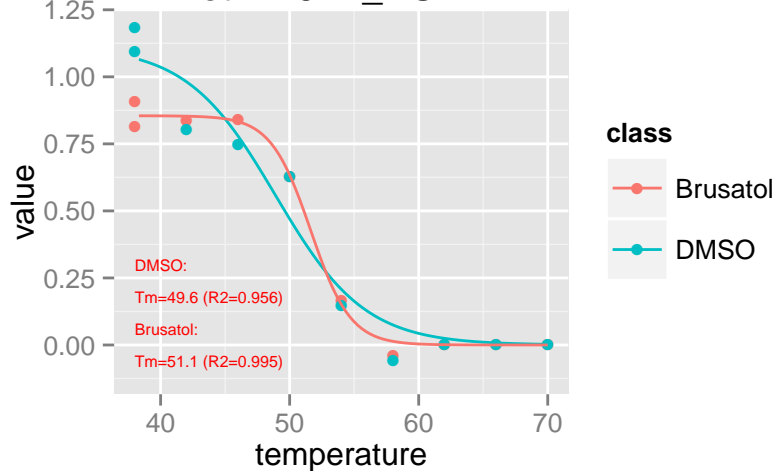

Prot: F175B\_HUMAN

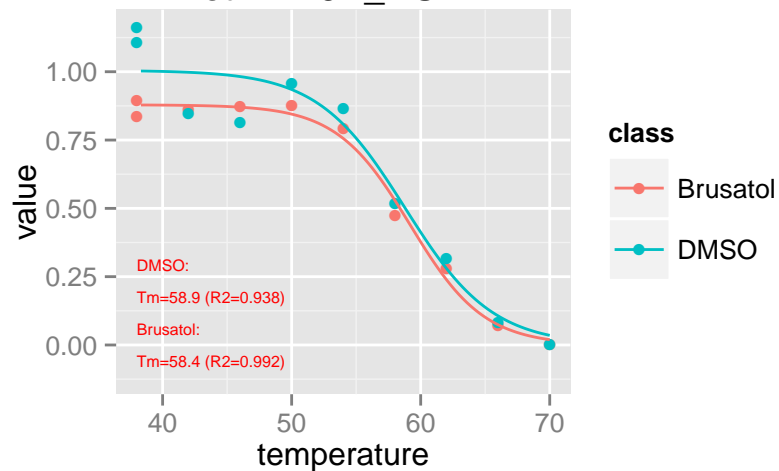

Prot: F192A\_HUMAN

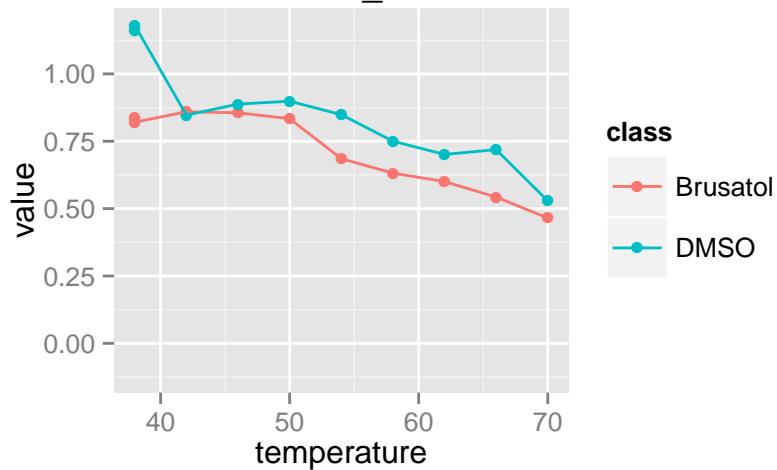

Prot: F195B\_HUMAN

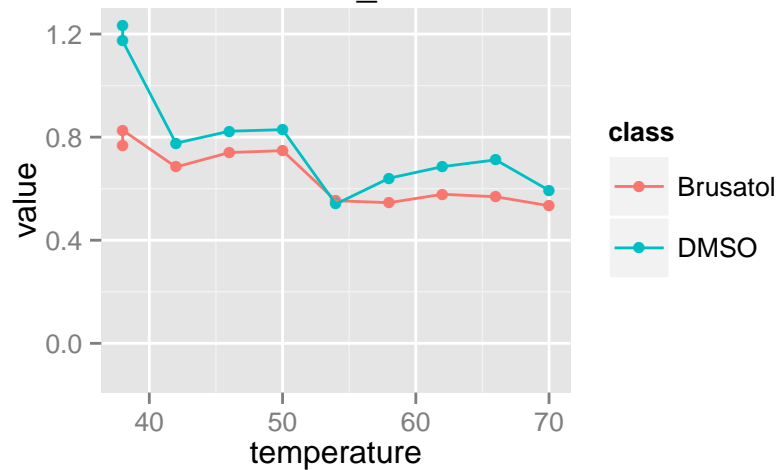

Prot: F1T011\_HUMAN

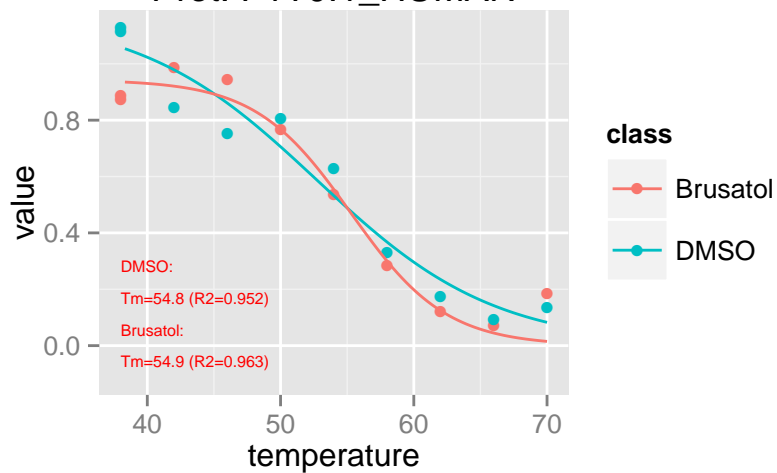

Prot: F203A\_HUMAN

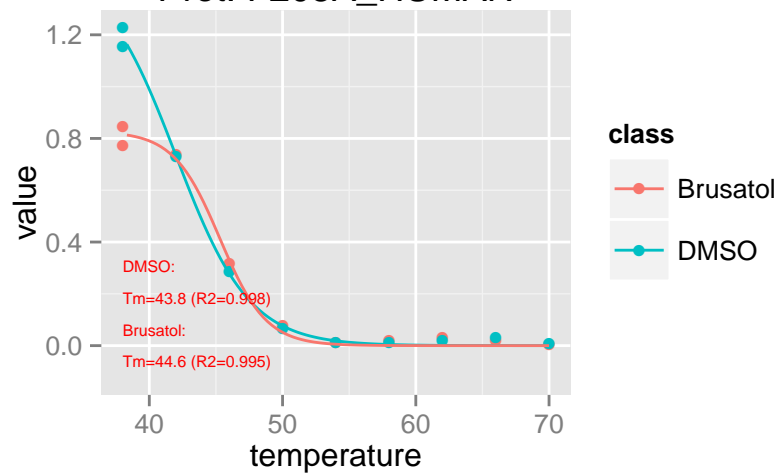

Prot: F207A\_HUMAN

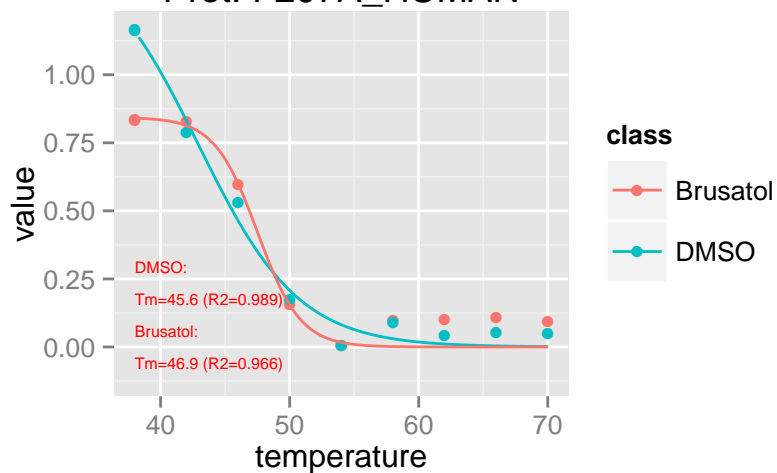

Prot: F261\_HUMAN

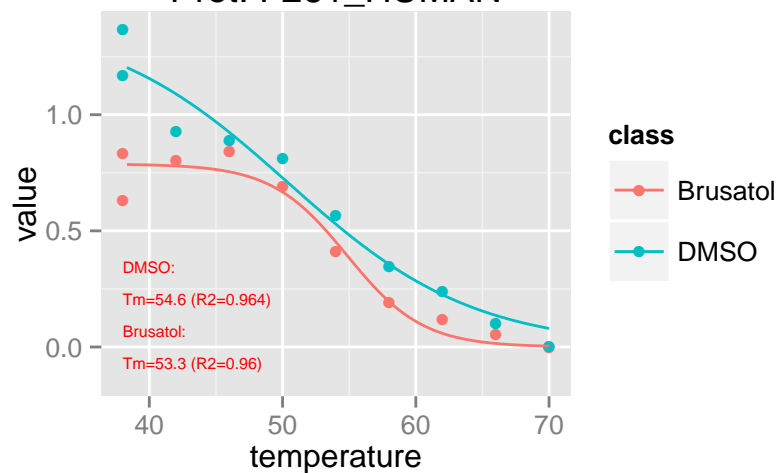

Prot: F263\_HUMAN

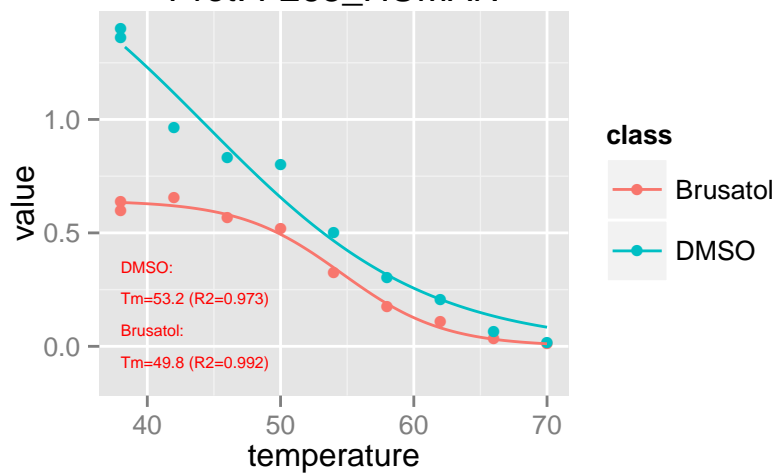

Prot: F5H6N3\_HUMAN

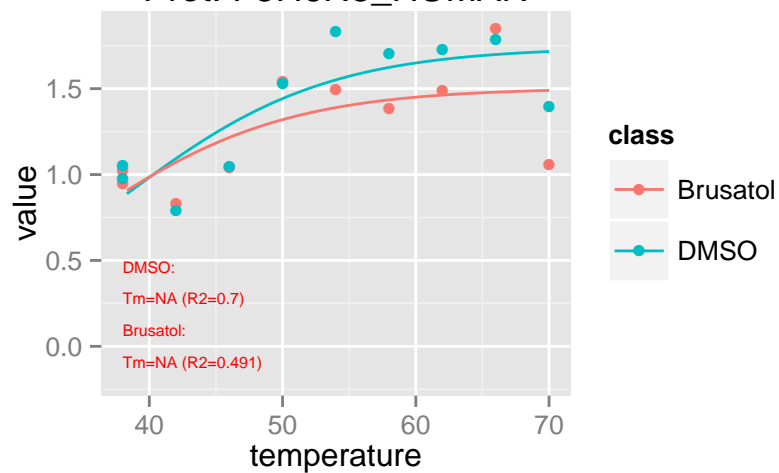

Prot: F6XY72\_HUMAN

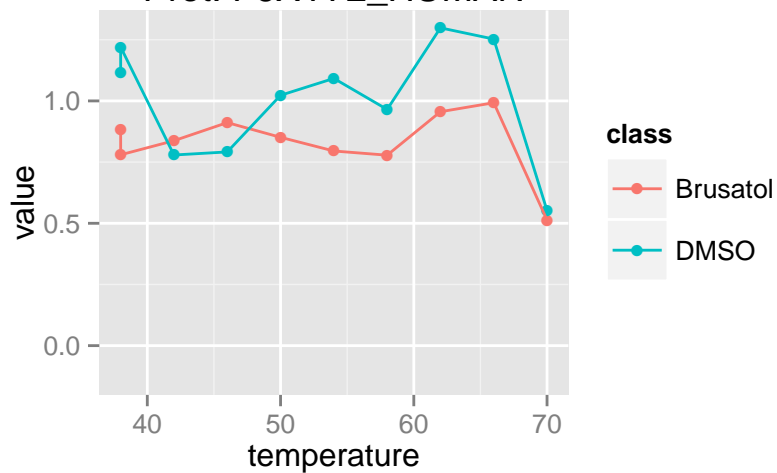

Prot: F8I2\_HUMAN

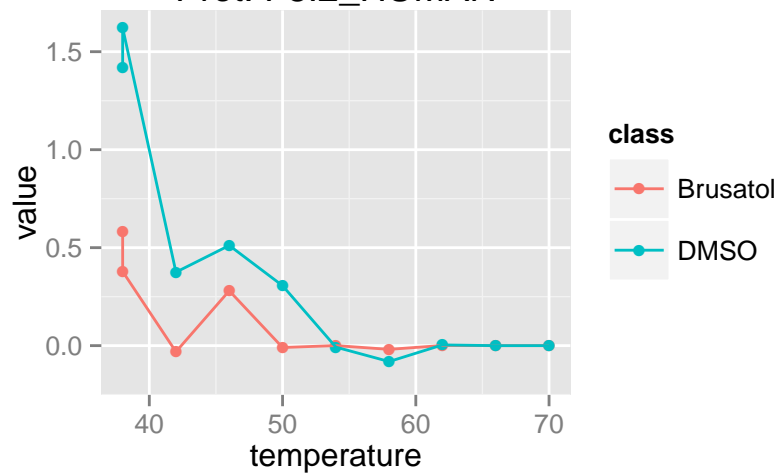

Prot: F8WAI1\_HUMAN

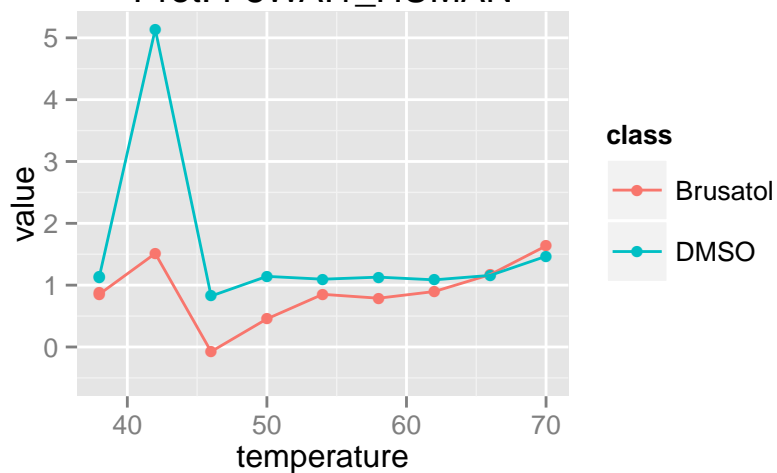

Prot: F91A1\_HUMAN

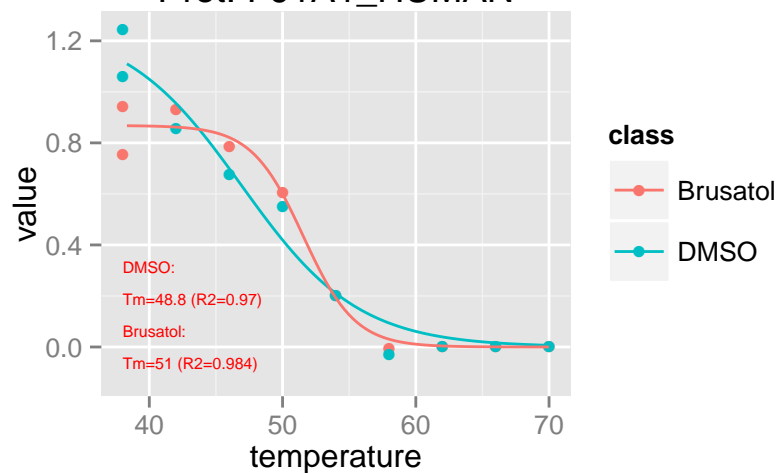

Prot: FA21A\_HUMAN

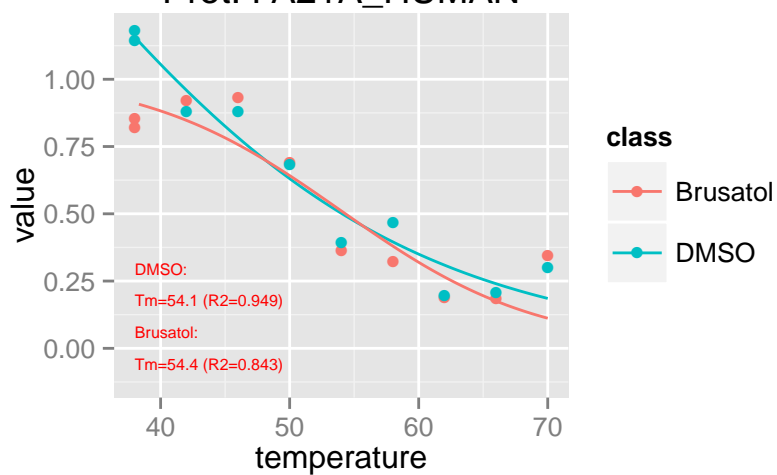

Prot: FA21C\_HUMAN

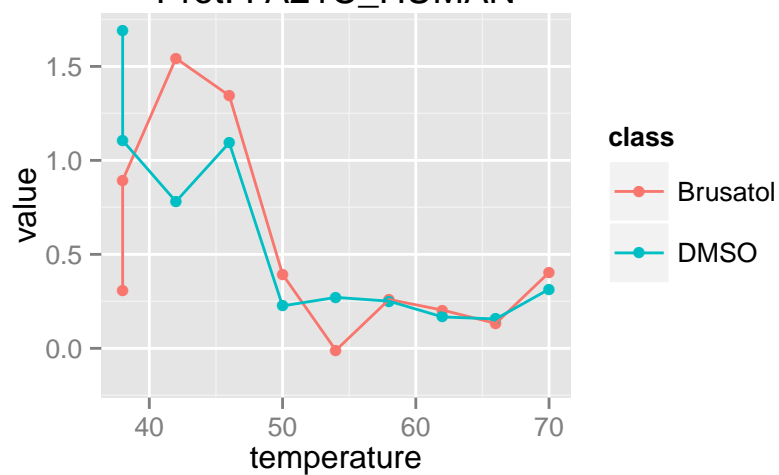

Prot: FA40A\_HUMAN

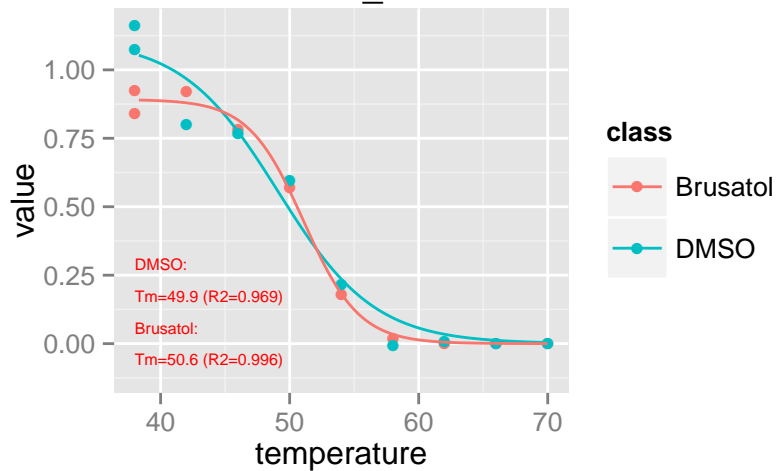

Prot: FA45A\_HUMAN

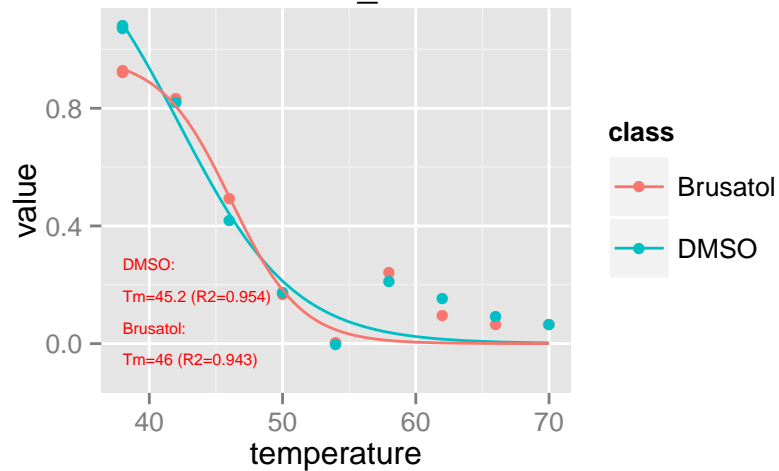

Prot: FA49A\_HUMAN

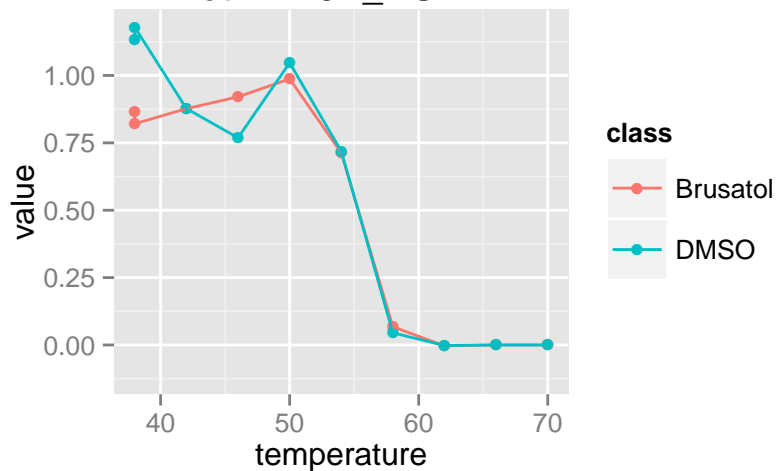

Prot: FA49B\_HUMAN

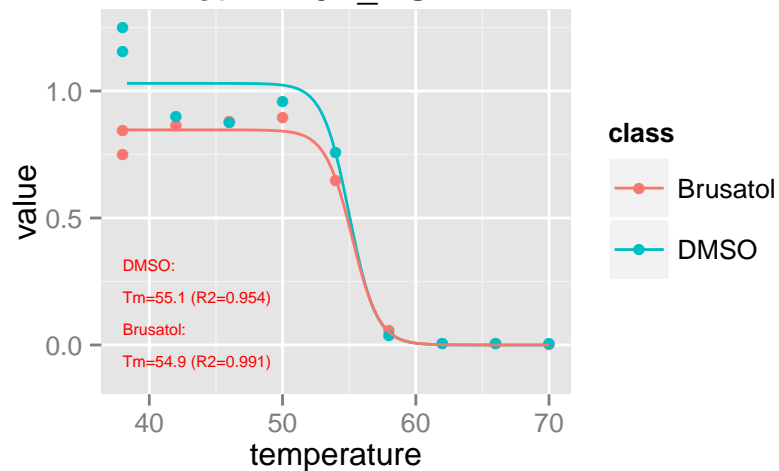

Prot: FA50A\_HUMAN

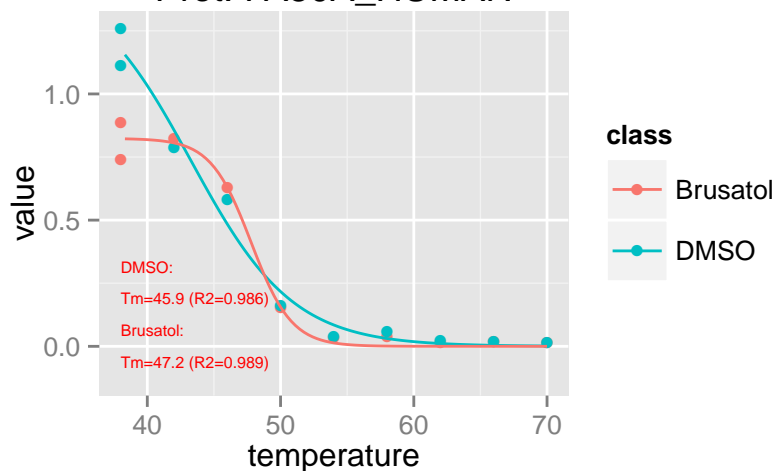

Prot: FA83D\_HUMAN

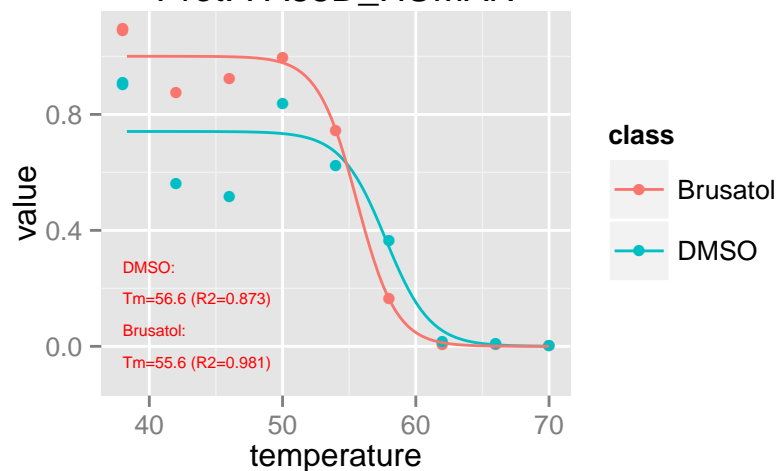

Prot: FA96A\_HUMAN

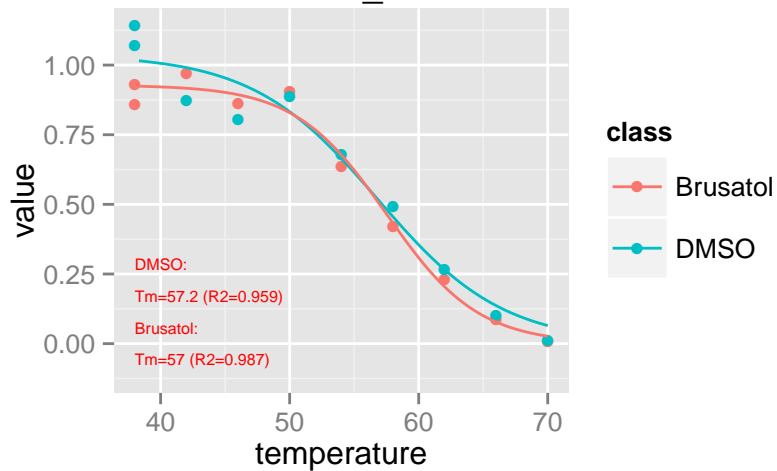

Prot: FA98A\_HUMAN

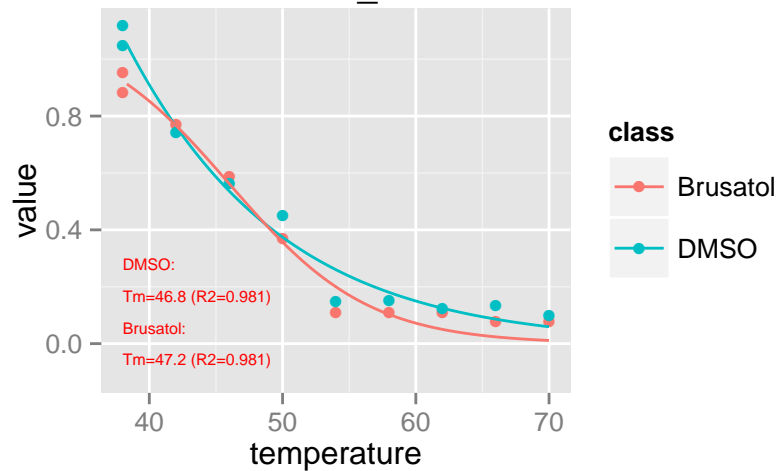

Prot: FA98B\_HUMAN

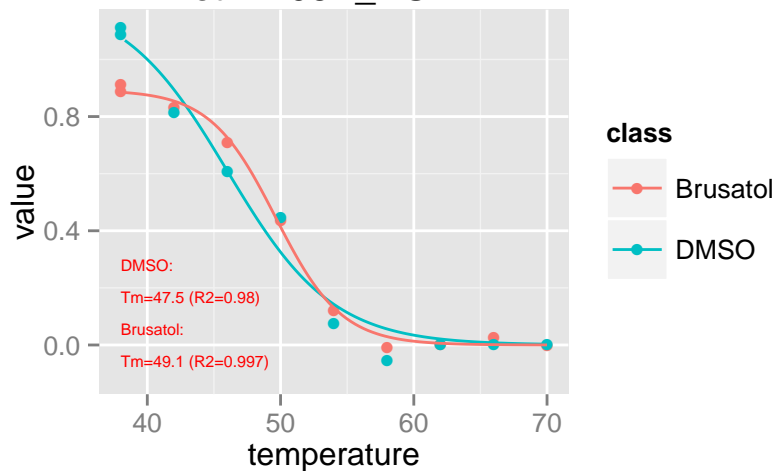

Prot: FAAA\_HUMAN

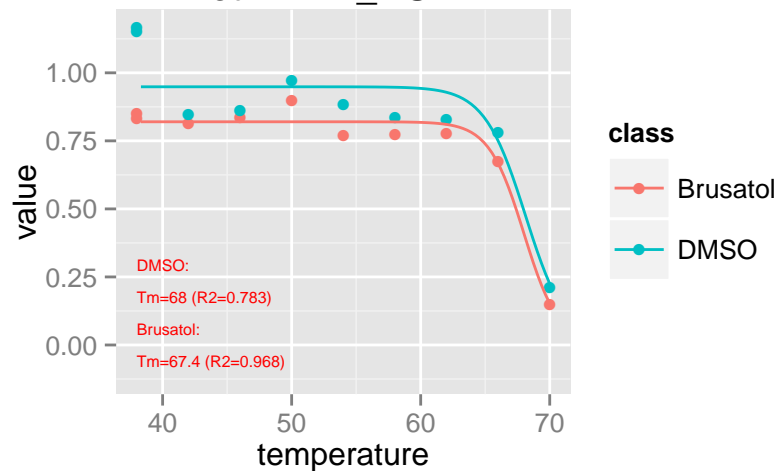

Prot: FABP5\_HUMAN

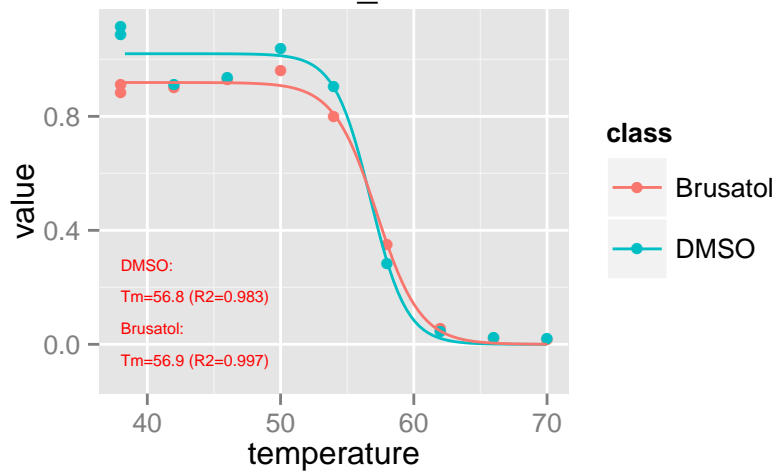

Prot: FACD2\_HUMAN

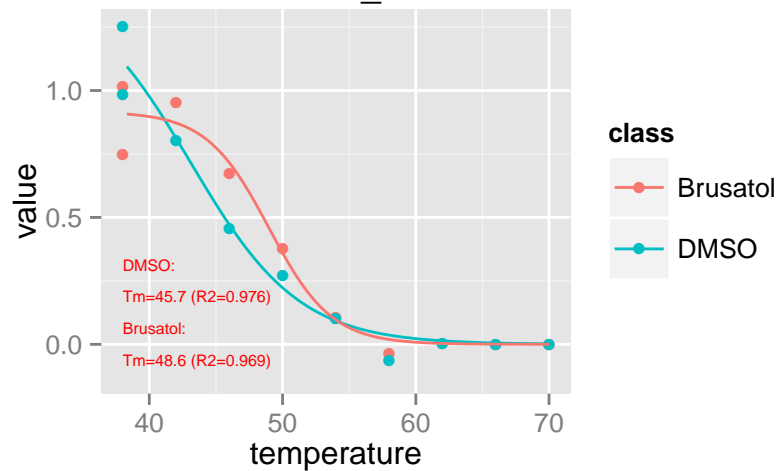



Prot: FAD1\_HUMAN

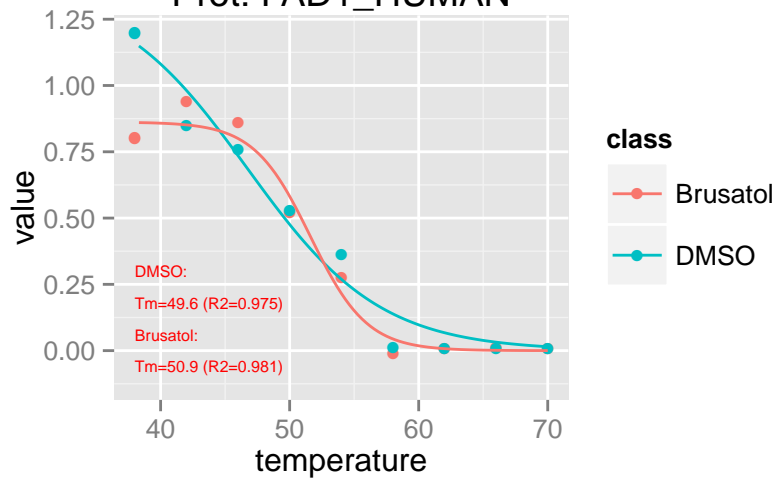

Prot: FADD\_HUMAN

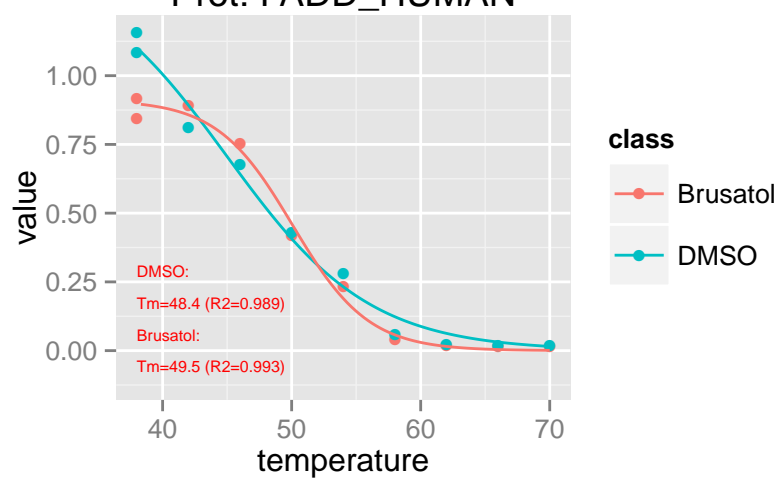

Prot: FAF1\_HUMAN

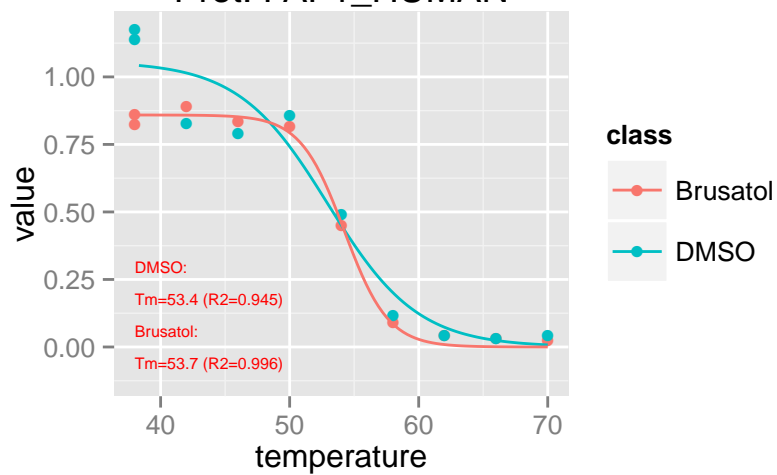

Prot: FAH2A\_HUMAN

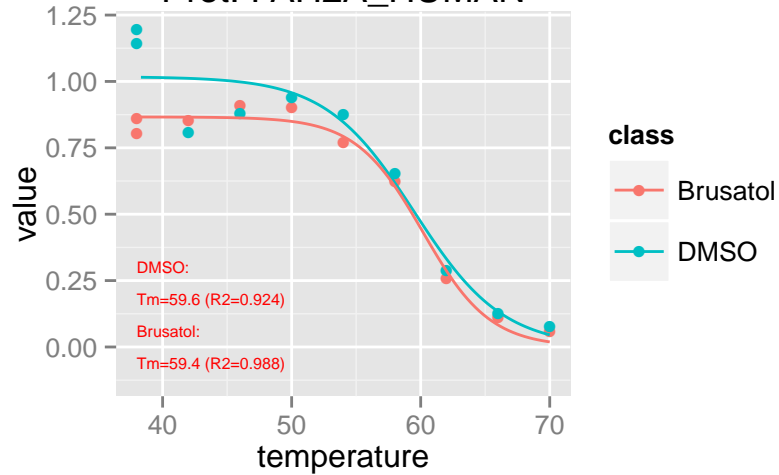

Prot: FAHD1\_HUMAN

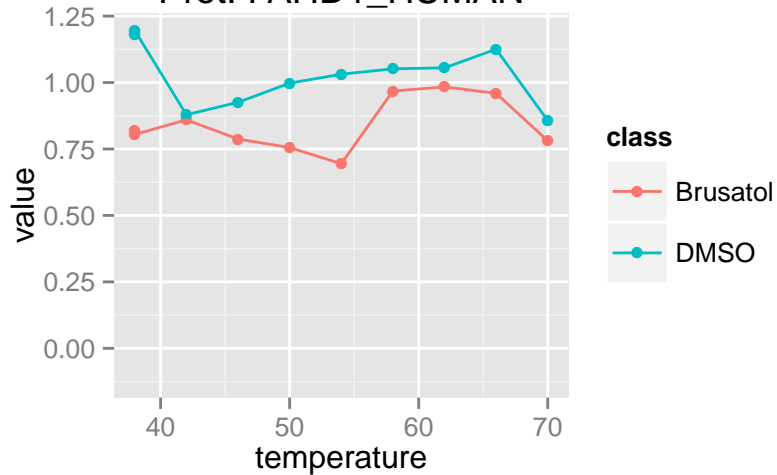

Prot: FAK1\_HUMAN

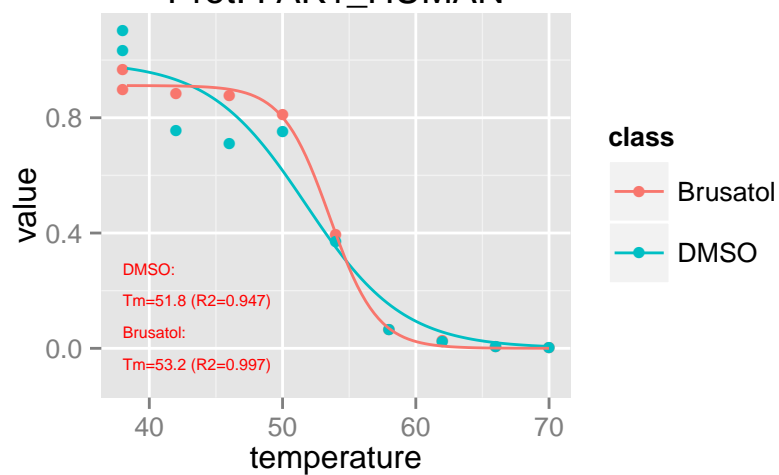

Prot: FAKD2\_HUMAN

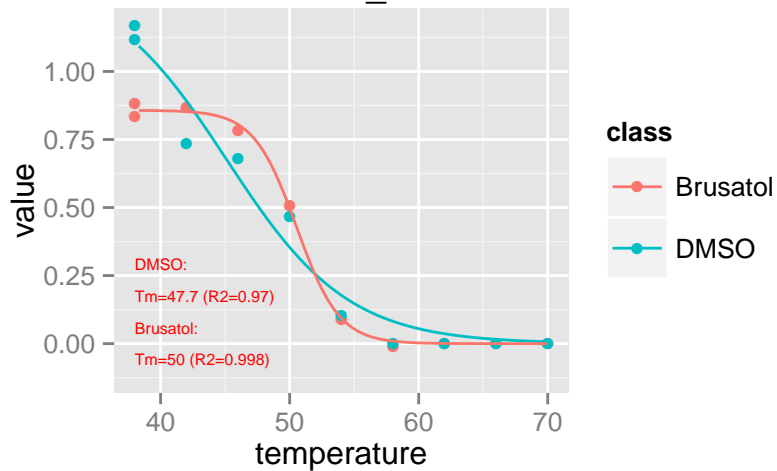

Prot: FAKD5\_HUMAN

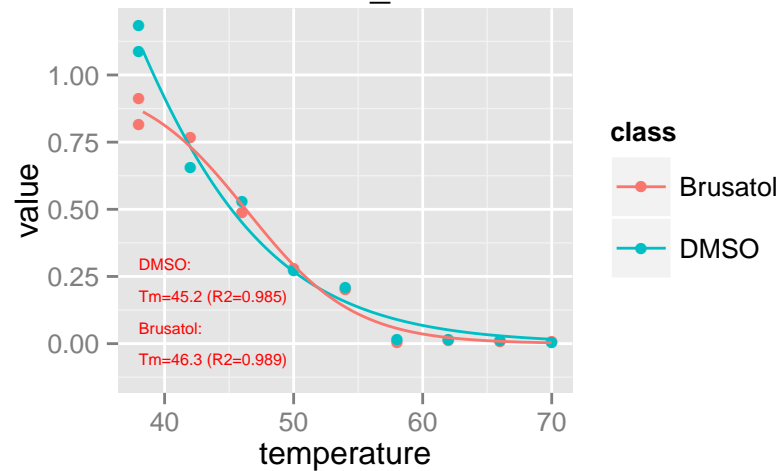

Prot: FANCA\_HUMAN

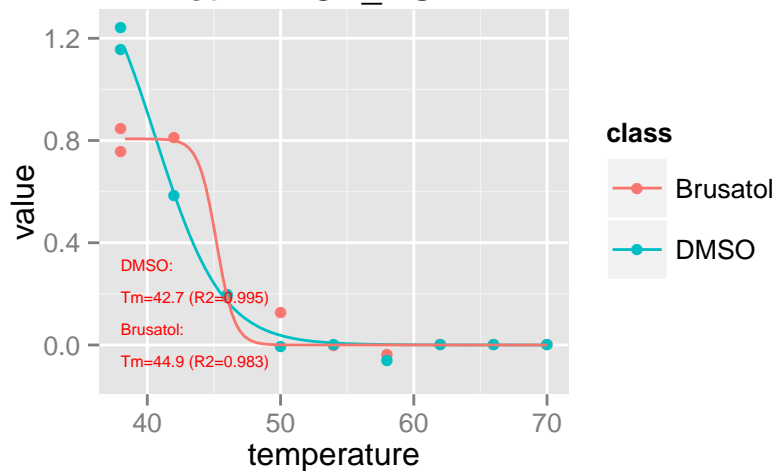

Prot: FANCI\_HUMAN

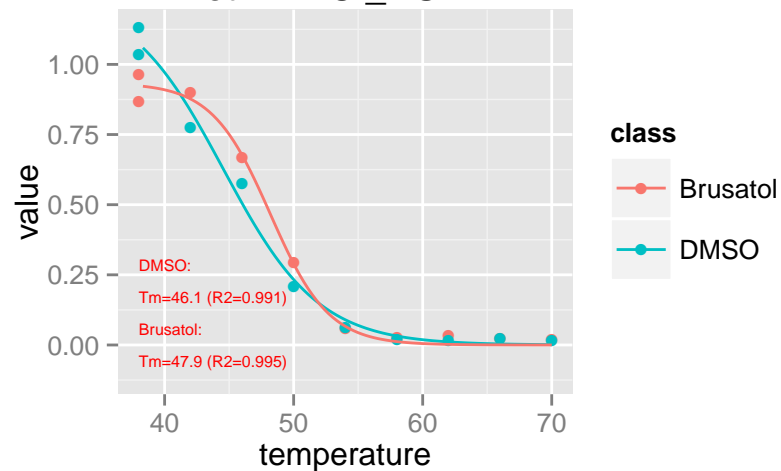

Prot: FAS\_HUMAN

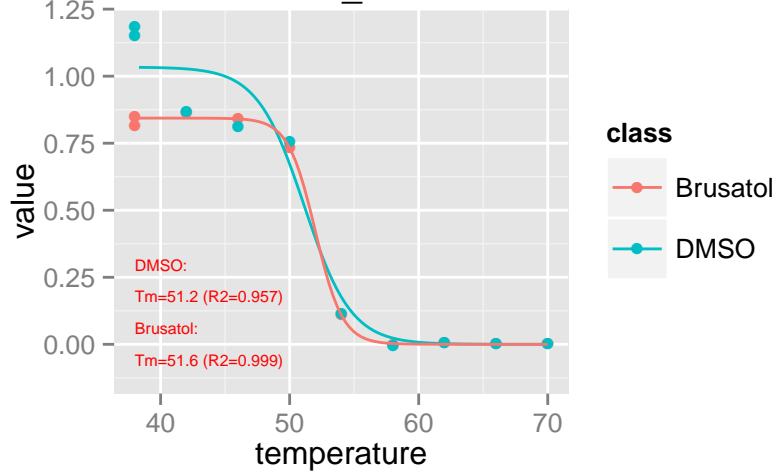

Prot: FBLI1\_HUMAN

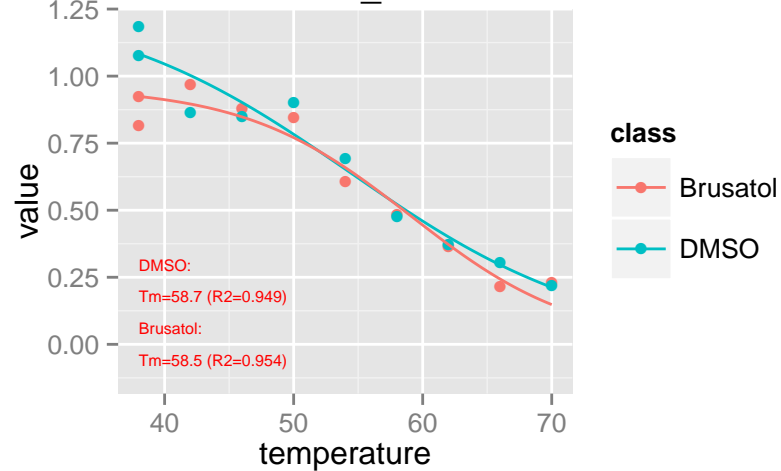

Prot: FBRL\_HUMAN

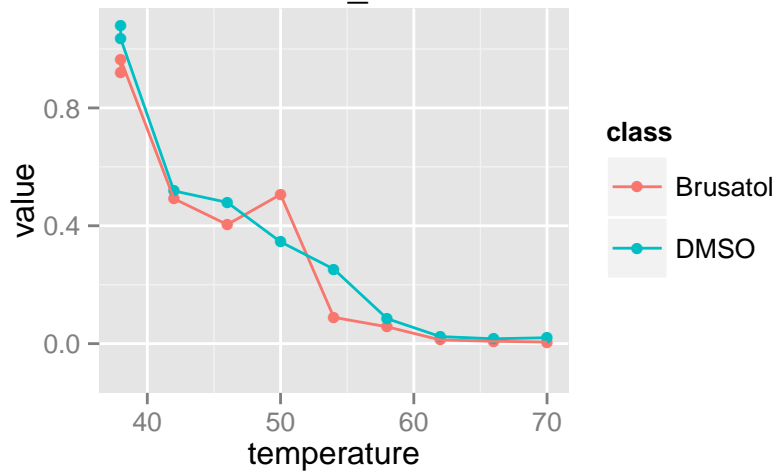

Prot: FBX21\_HUMAN

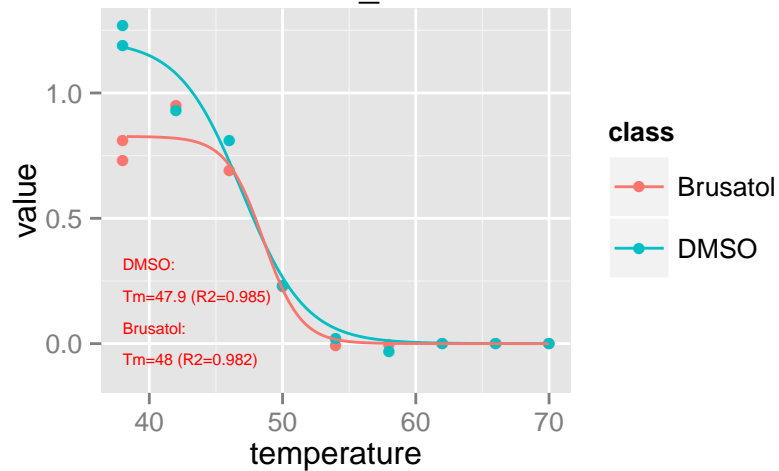

Prot: FBX22\_HUMAN

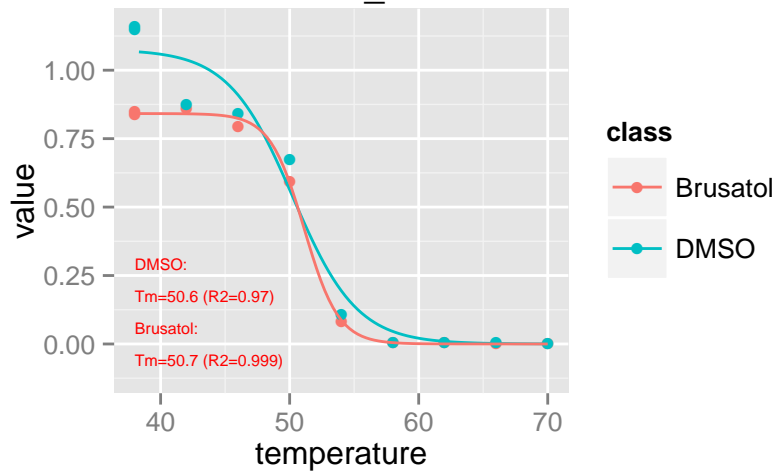

Prot: FBX3\_HUMAN

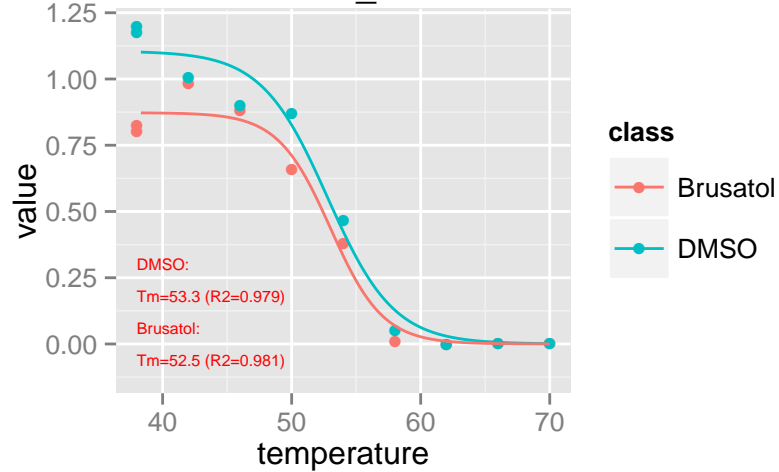

Prot: FBX30\_HUMAN

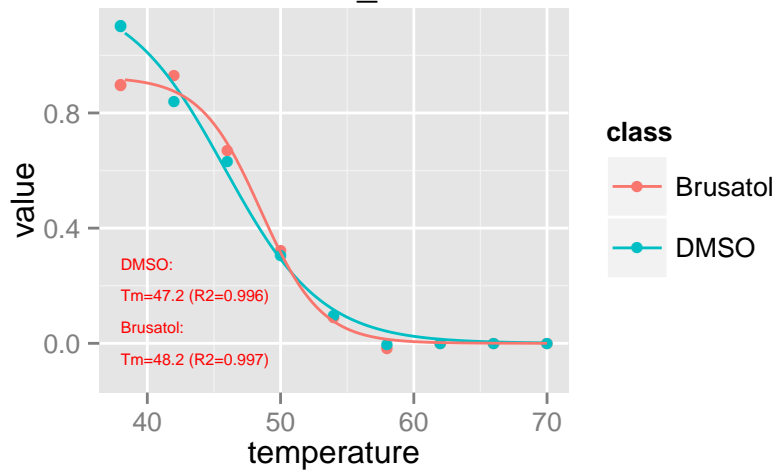

Prot: FBX7\_HUMAN

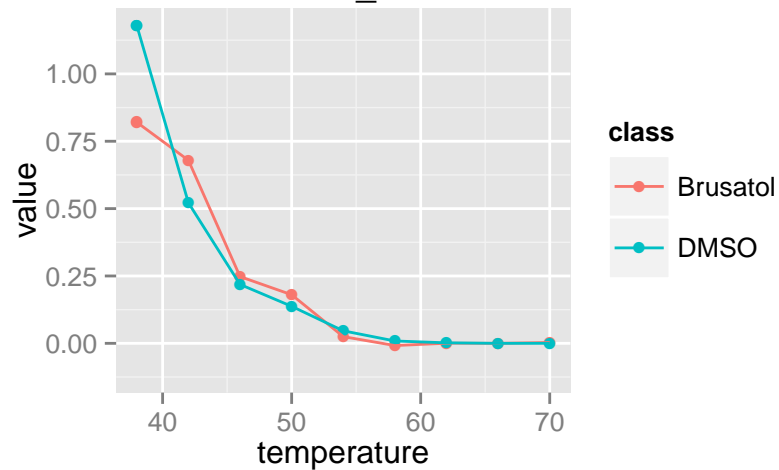

Prot: FCHO2\_HUMAN

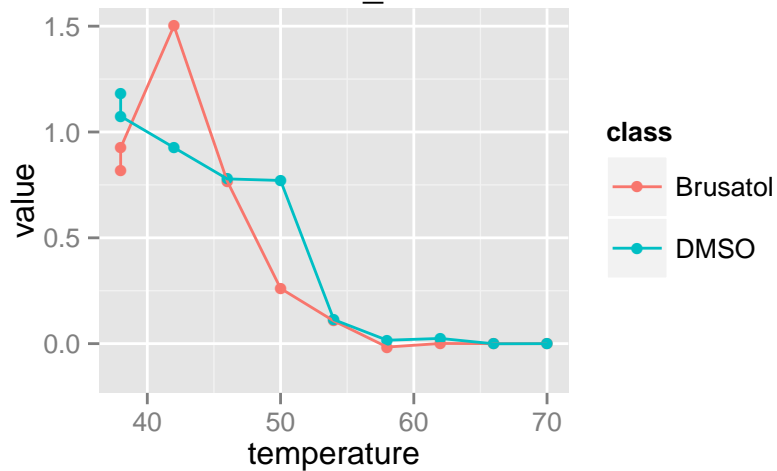

Prot: FCL\_HUMAN

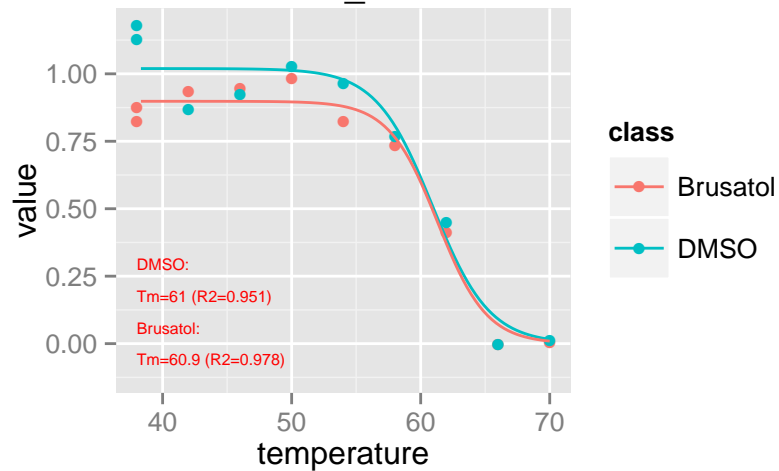

Prot: FEN1\_HUMAN

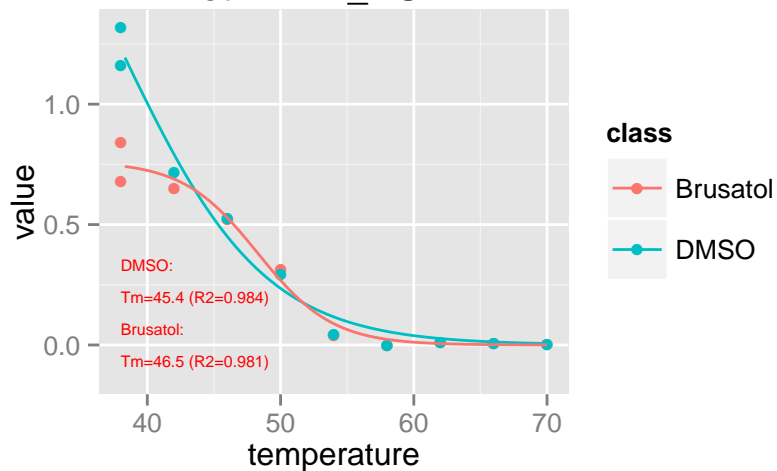

Prot: FERM1\_HUMAN

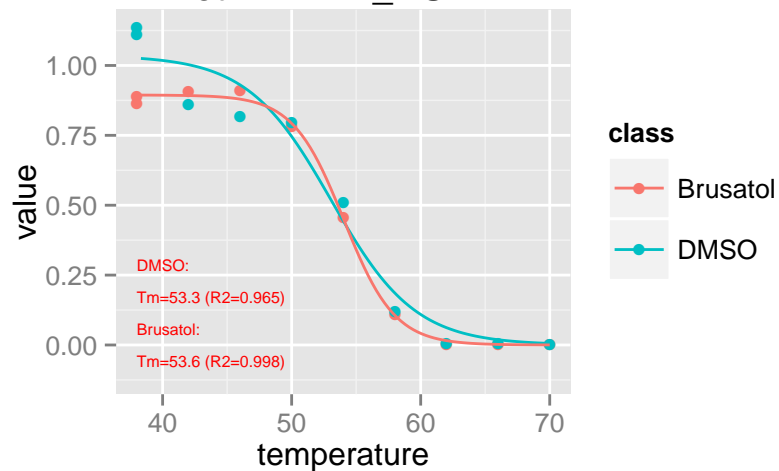

Prot: FERM2\_HUMAN

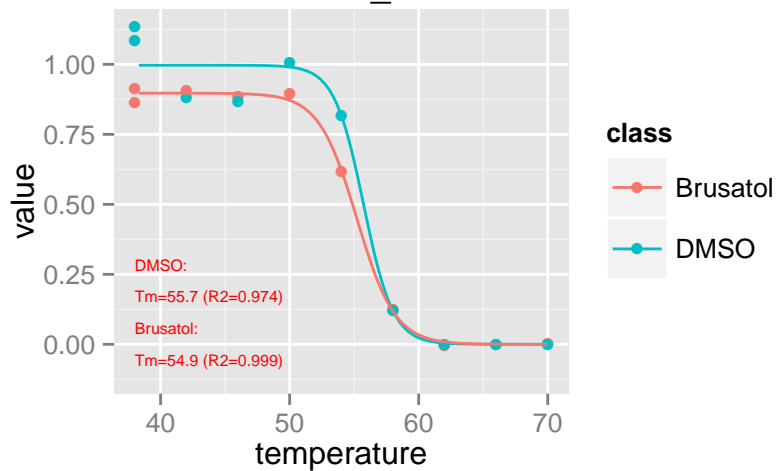

Prot: FETUA\_HUMAN

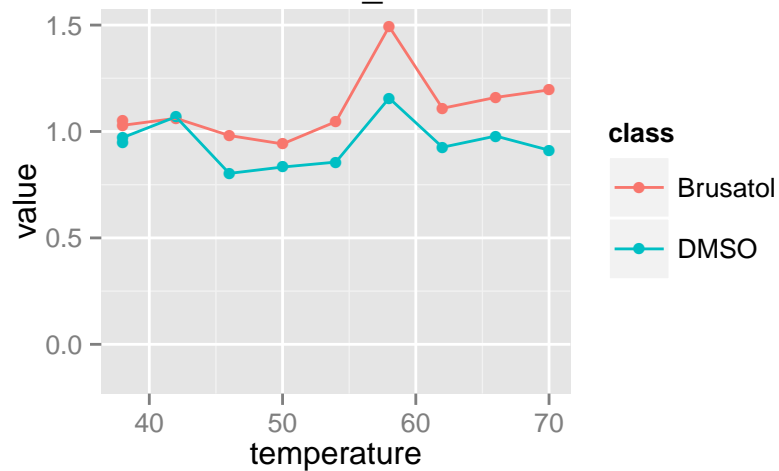

Prot: FFR\_HUMAN

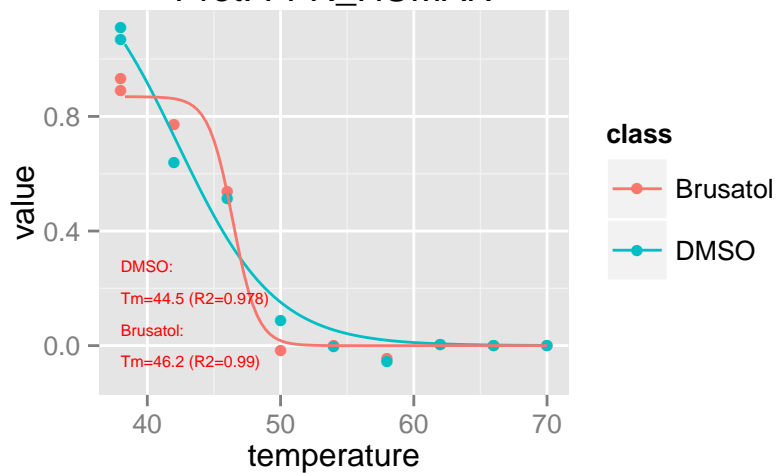

Prot: FGD6\_HUMAN

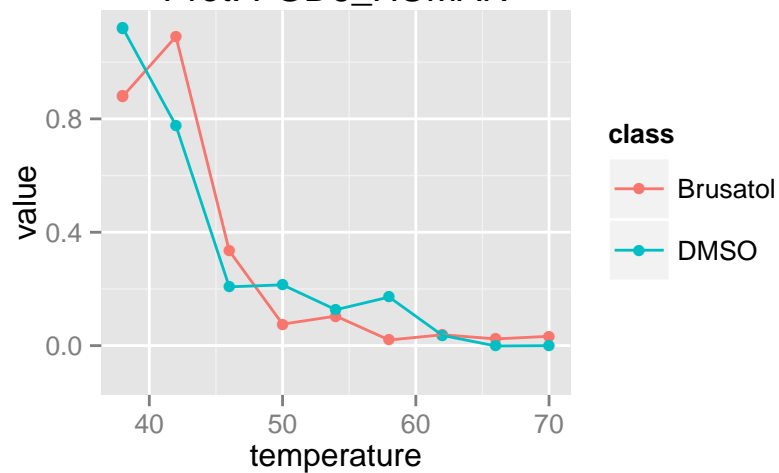

Prot: FGF2\_HUMAN

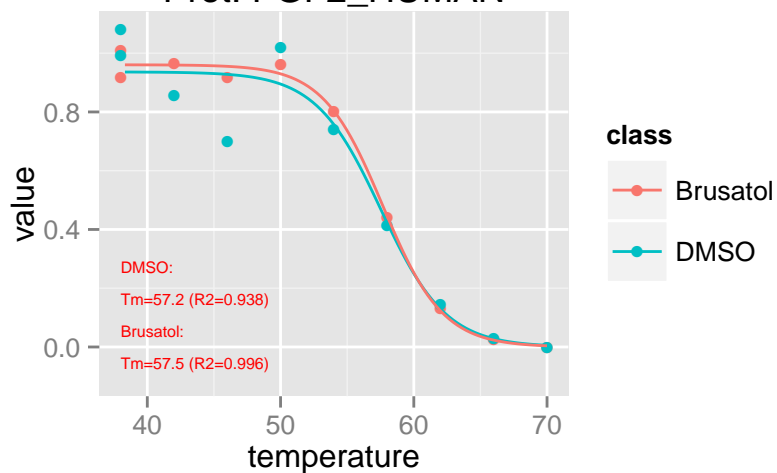

Prot: FHL1\_HUMAN

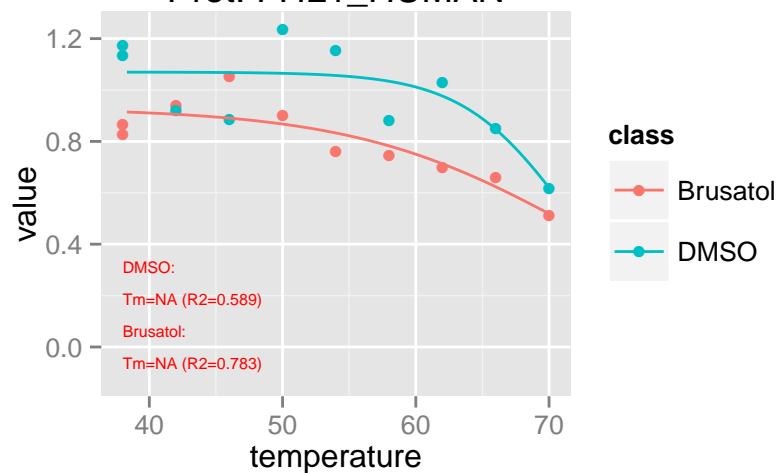

Prot: FHL2\_HUMAN

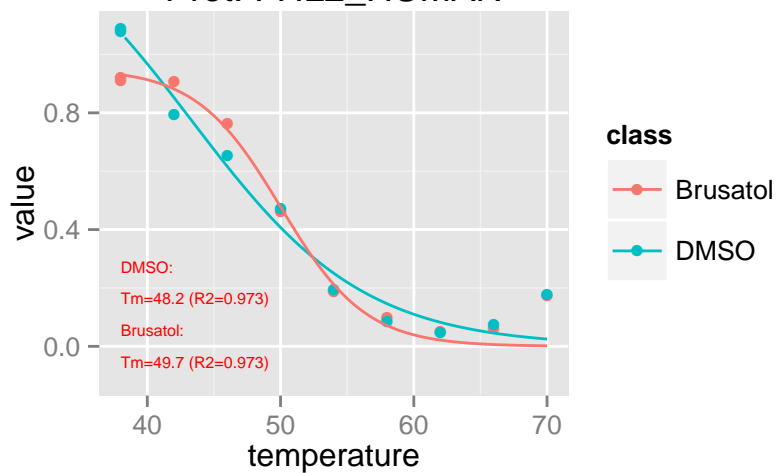

Prot: FHOD1\_HUMAN

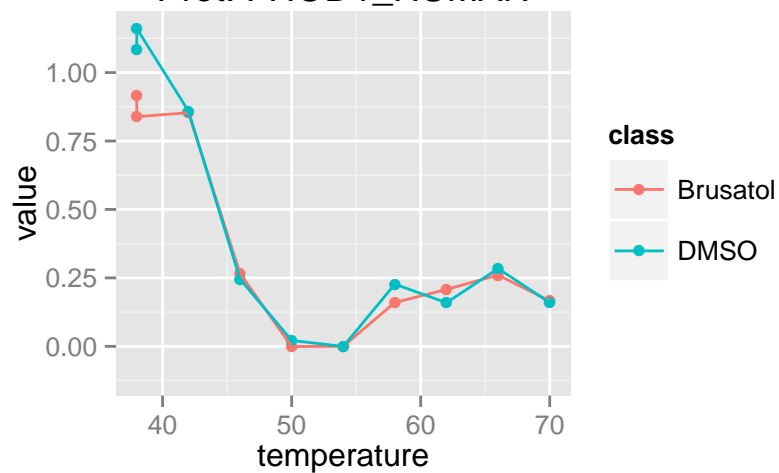

Prot: FIGL1\_HUMAN

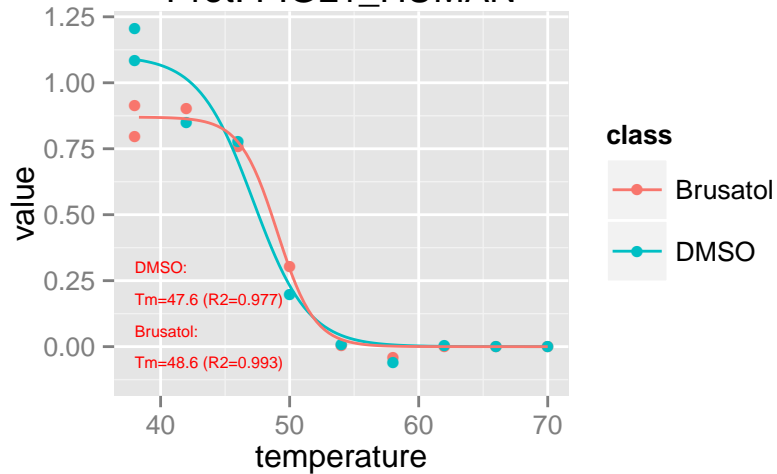

Prot: FIP1\_HUMAN

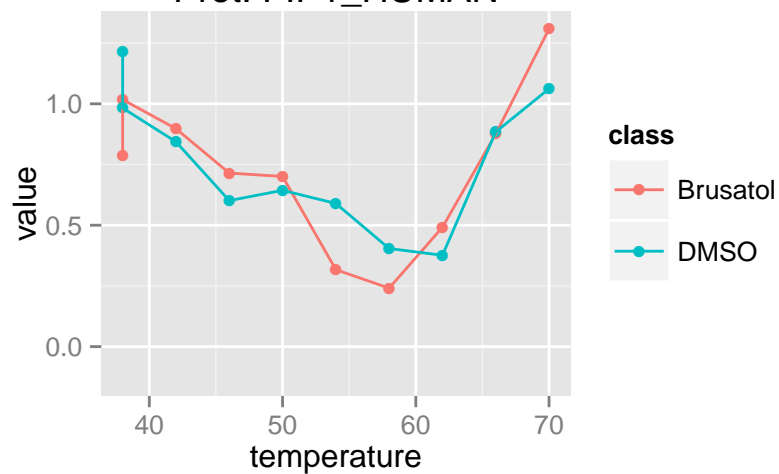

Prot: FKB10\_HUMAN

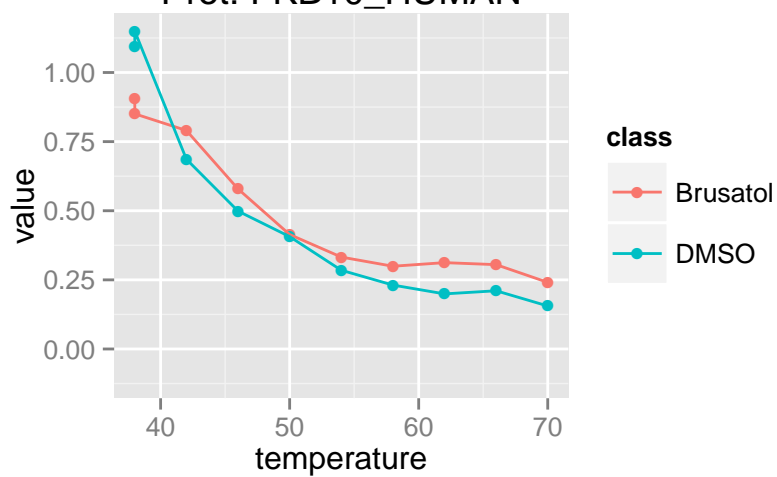

Prot: FKB15\_HUMAN

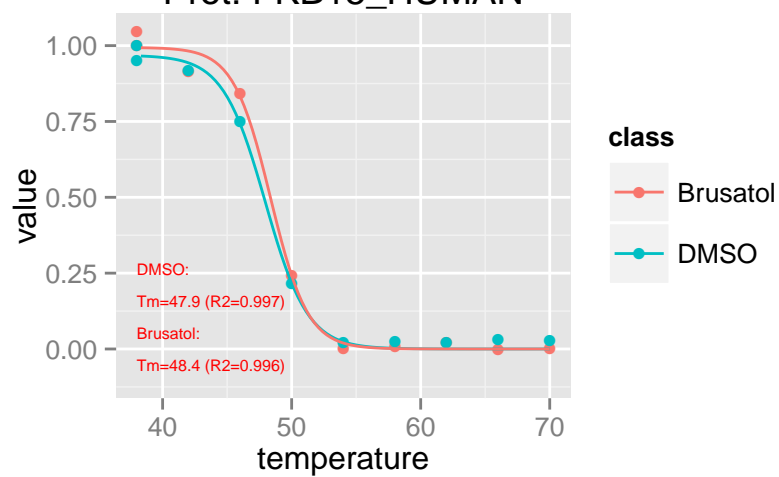

Prot: FKB1A\_HUMAN

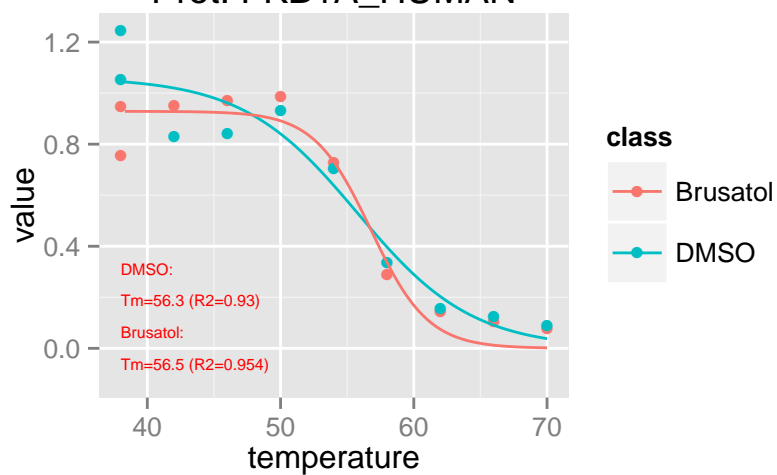

Prot: FKB9L\_HUMAN

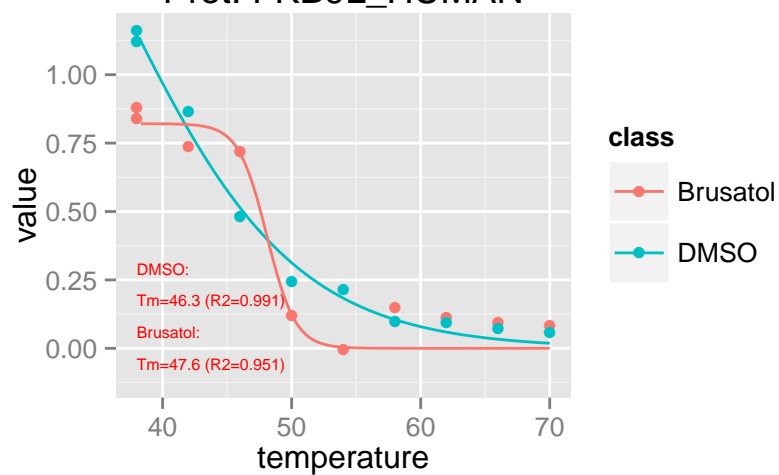

Prot: FKBP2\_HUMAN

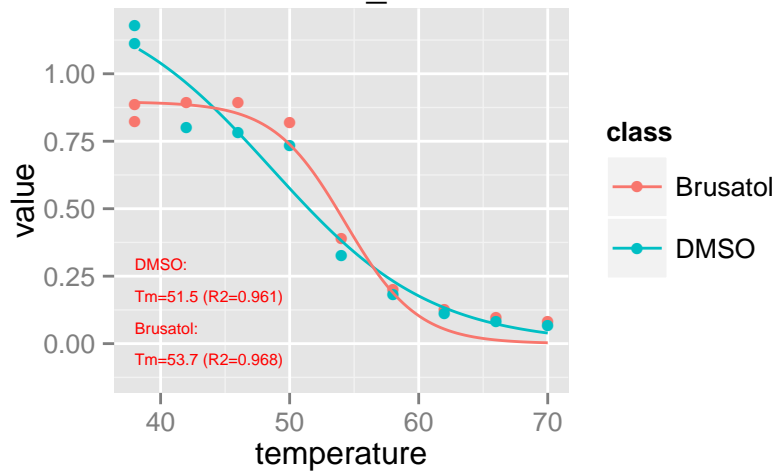

Prot: FKBP3\_HUMAN

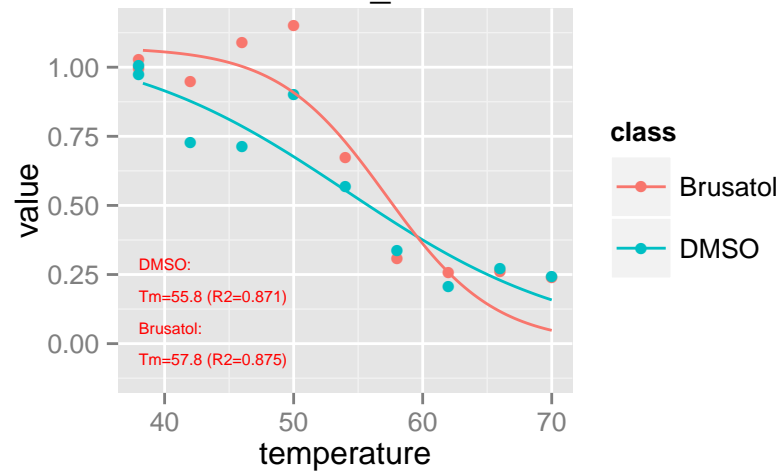

Prot: FKBP4\_HUMAN

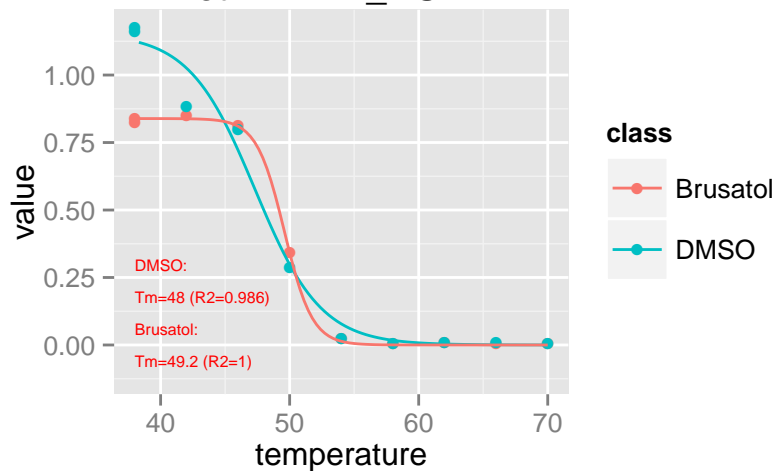

Prot: FKBP5\_HUMAN

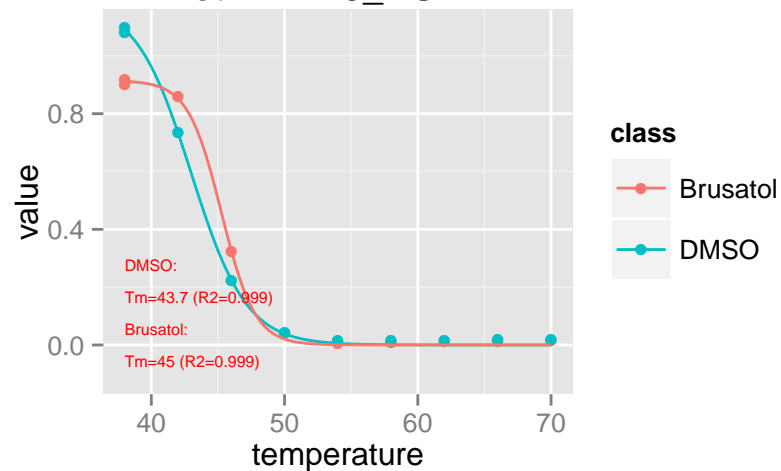

Prot: FKBP9\_HUMAN

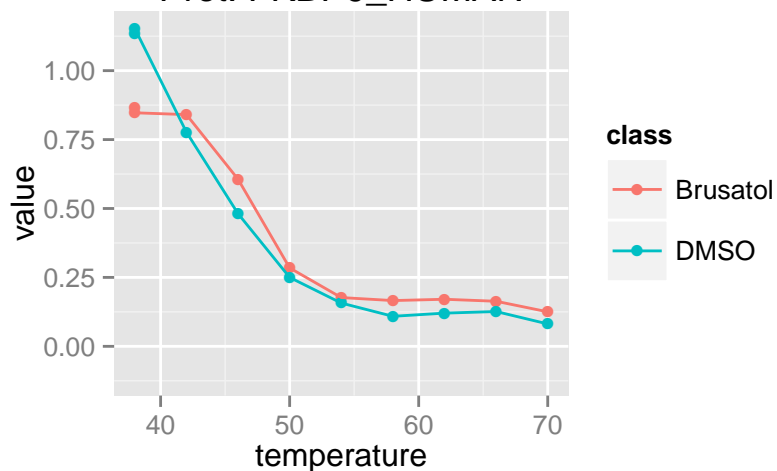

Prot: FL2D\_HUMAN

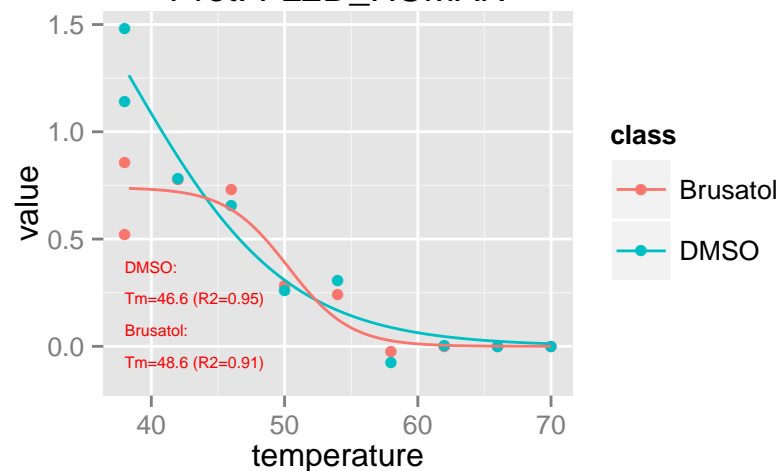

Prot: FLII\_HUMAN

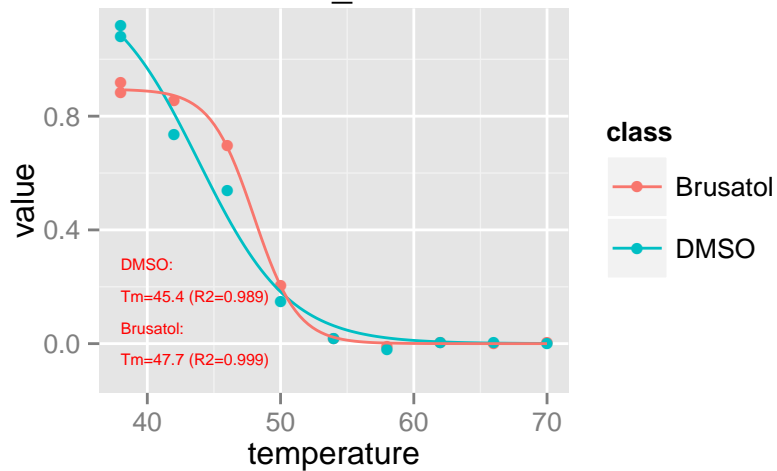

Prot: FLNA\_HUMAN

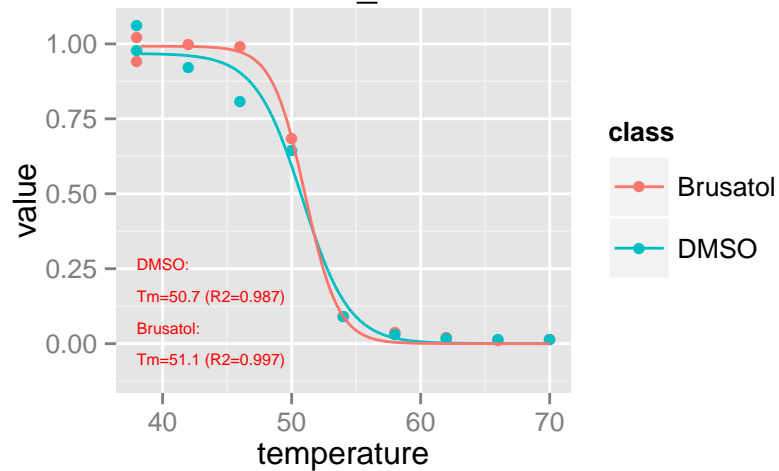

Prot: FLNB\_HUMAN

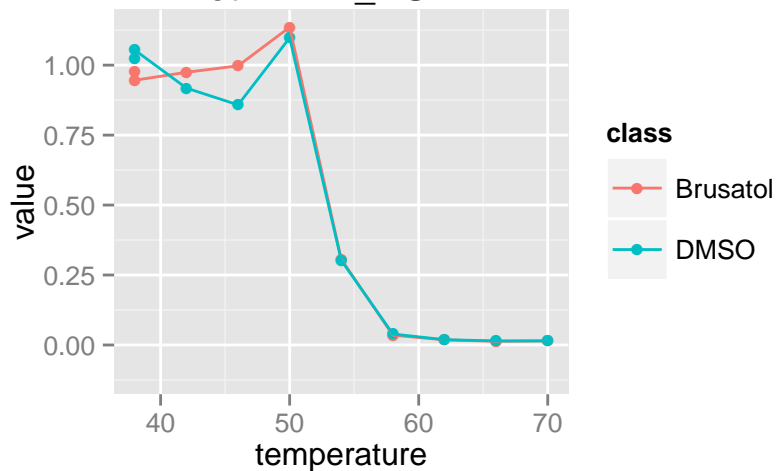

Prot: FMNL2\_HUMAN

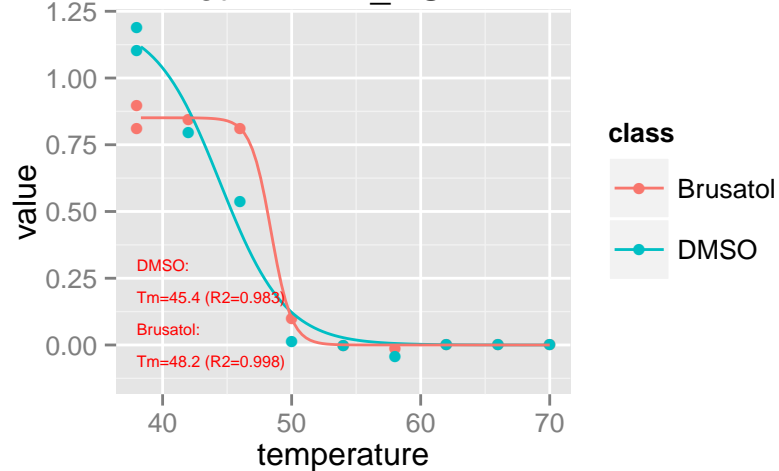

Prot: FN3K\_HUMAN

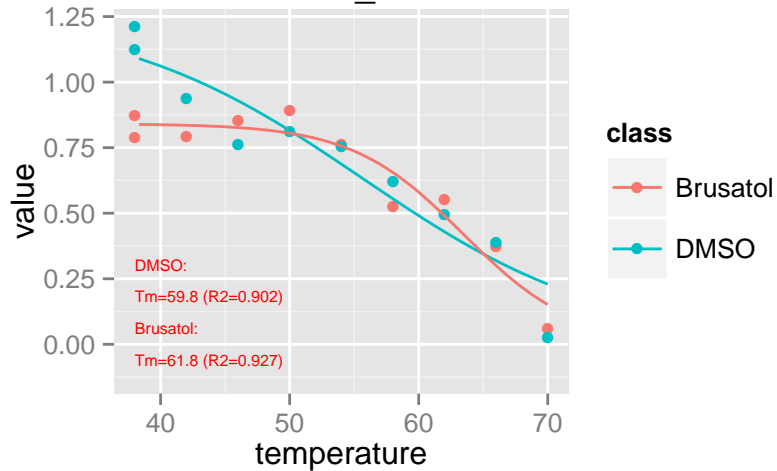

Prot: FNBP1\_HUMAN

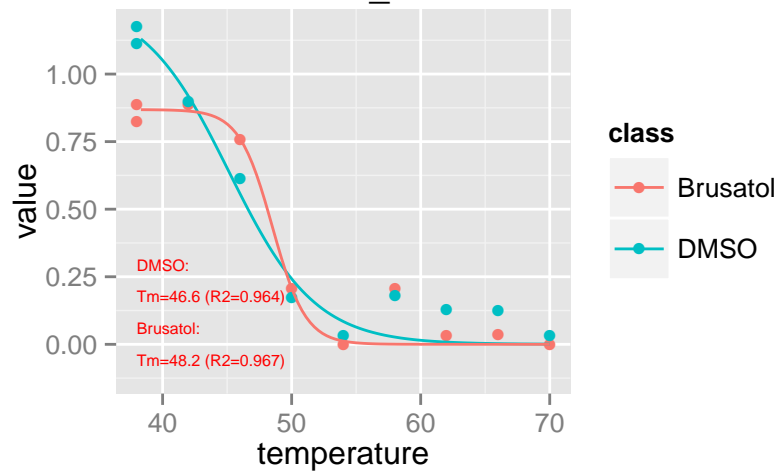



Prot: FNBP4\_HUMAN

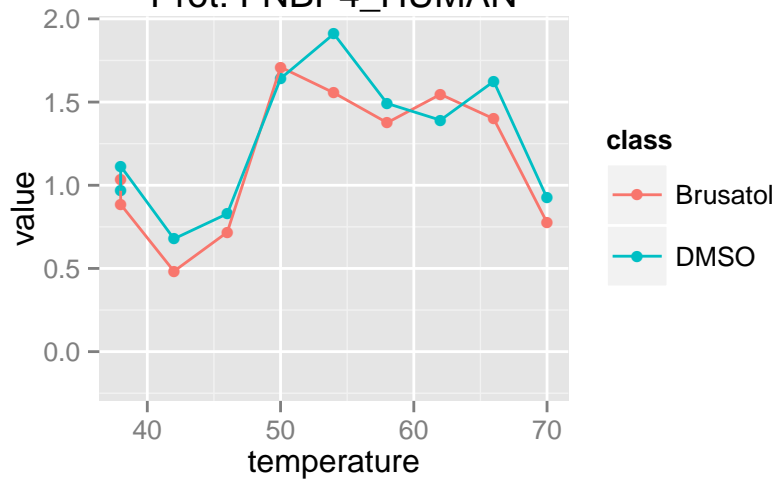

Prot: FNTA\_HUMAN

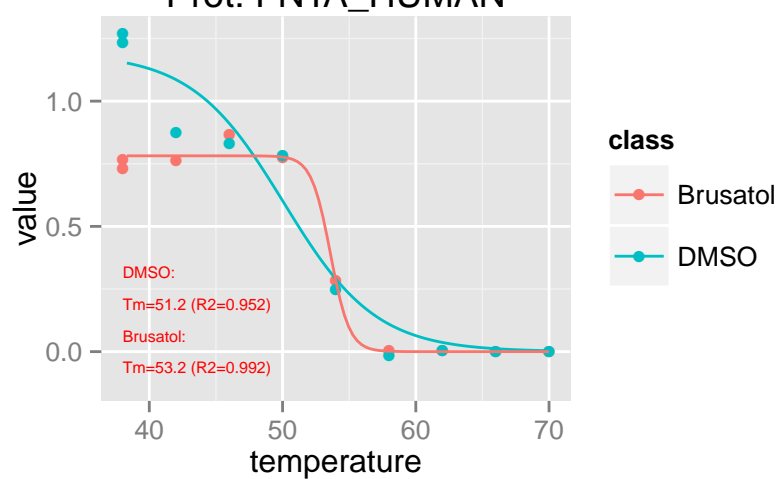

Prot: FNTB\_HUMAN

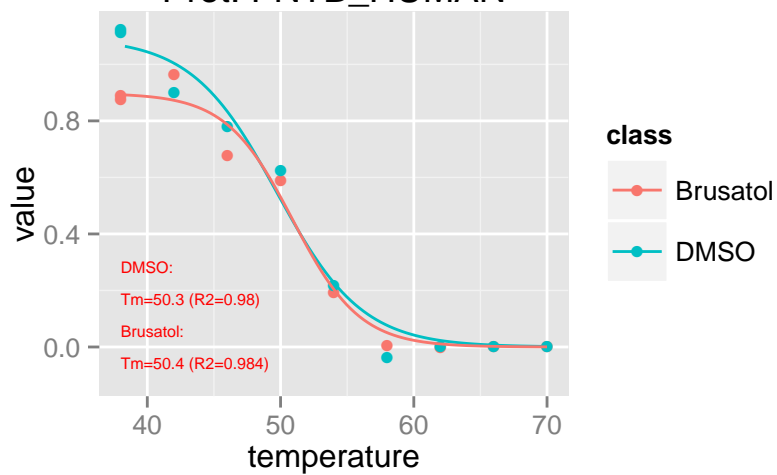

Prot: FOXK1\_HUMAN

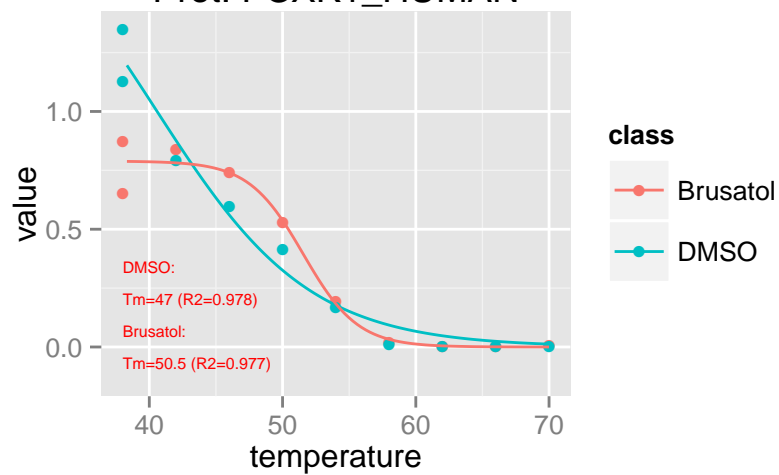

Prot: FOXK2\_HUMAN

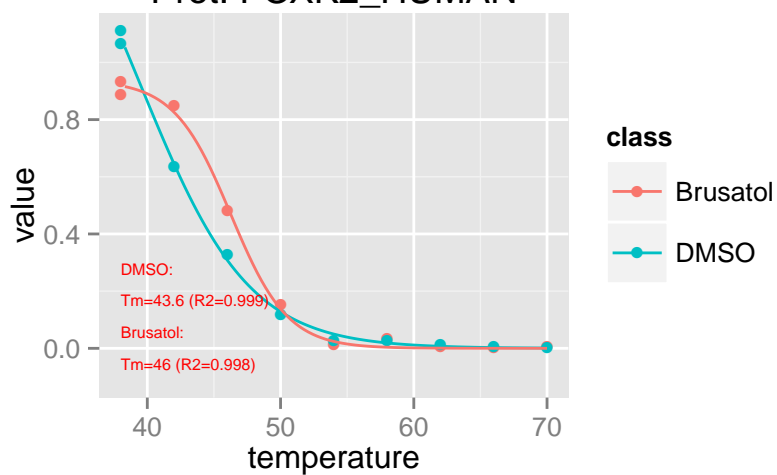

Prot: FPGT\_HUMAN

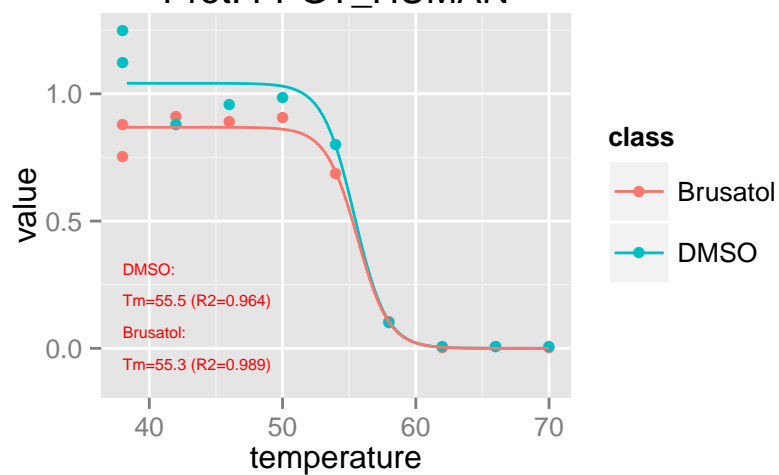

Prot: FPPS\_HUMAN

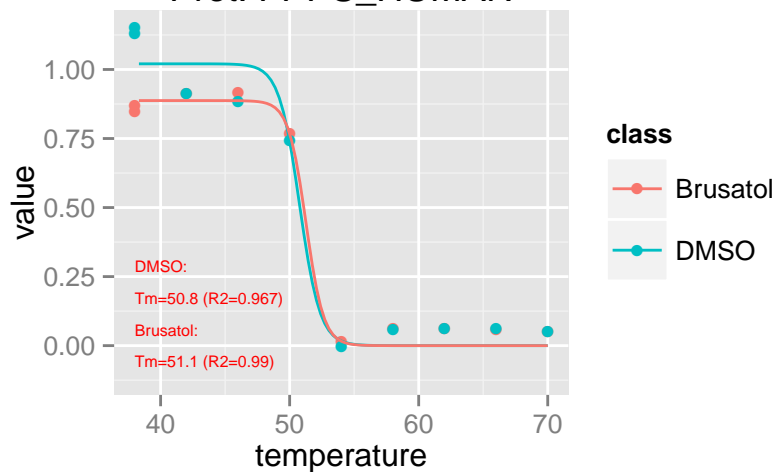

Prot: FR1OP\_HUMAN

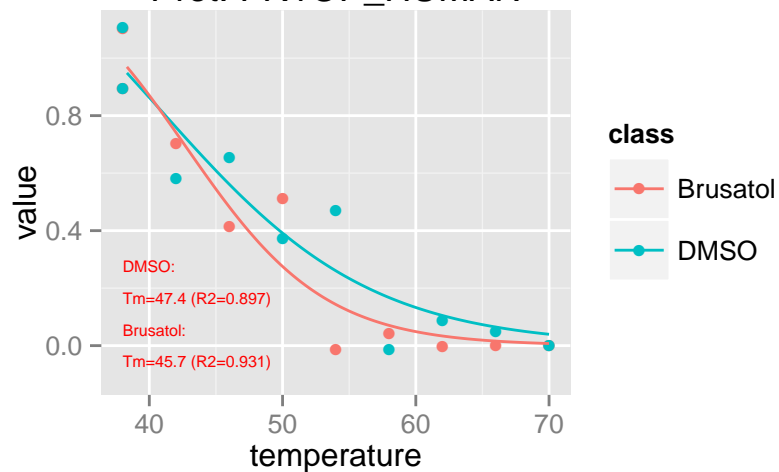

Prot: FRDA\_HUMAN

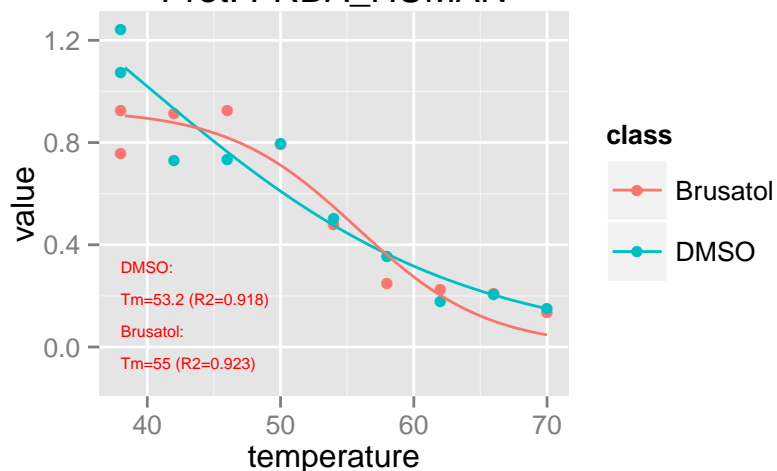

Prot: FRYL\_HUMAN

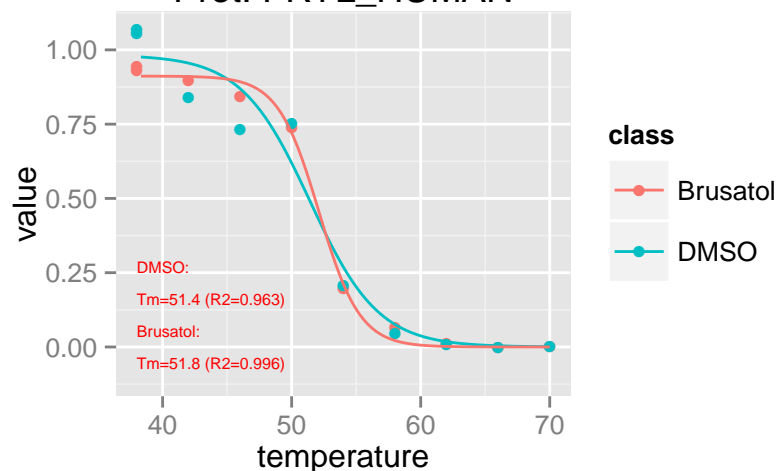

Prot: FSCN1\_HUMAN

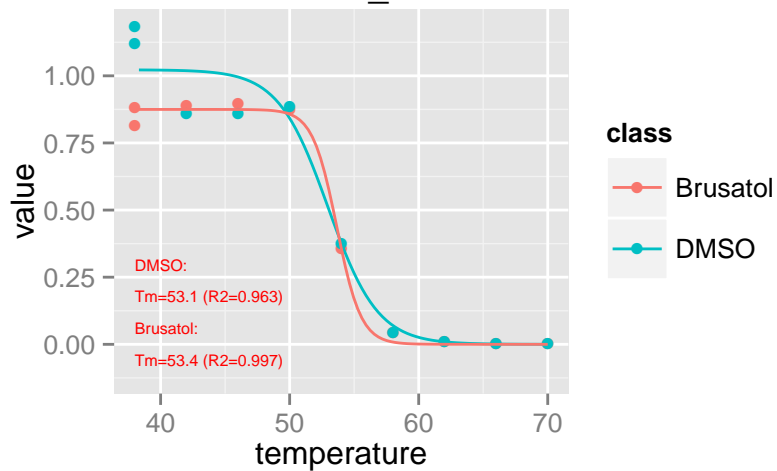

Prot: FTO\_HUMAN

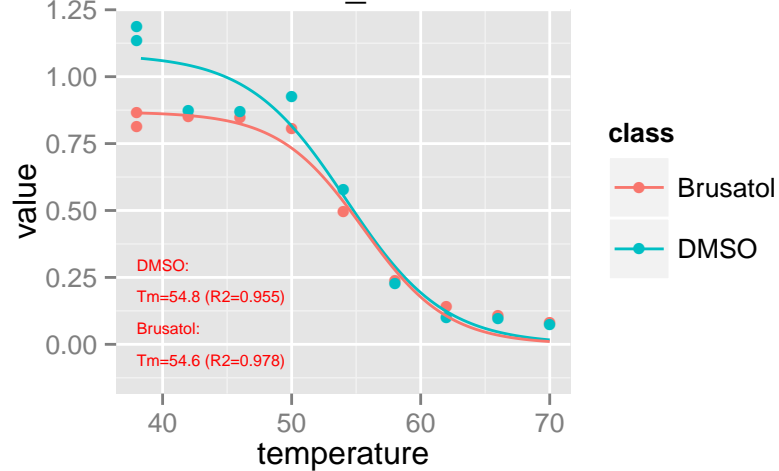

Prot: FUBP1\_HUMAN

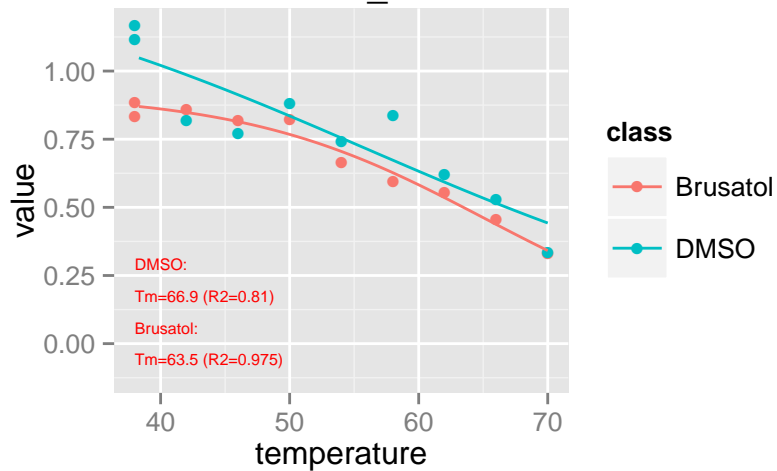

Prot: FUBP2\_HUMAN

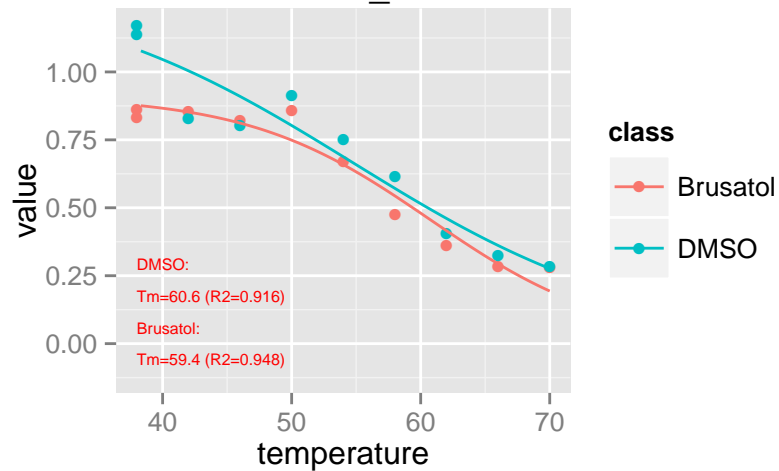

Prot: FUBP3\_HUMAN

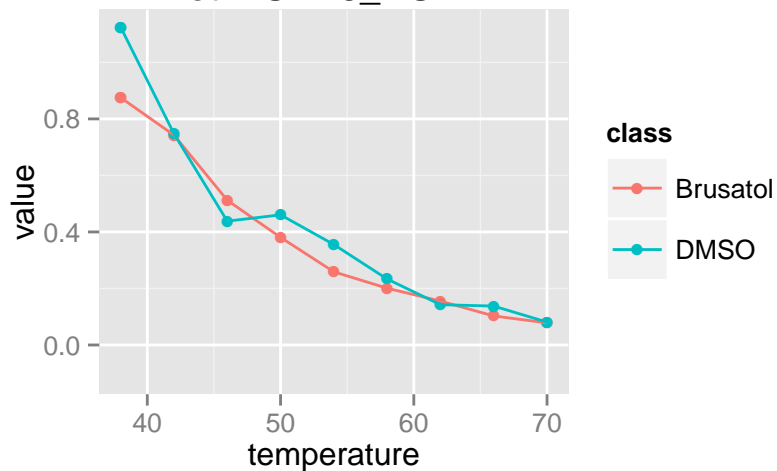

Prot: FUCO\_HUMAN

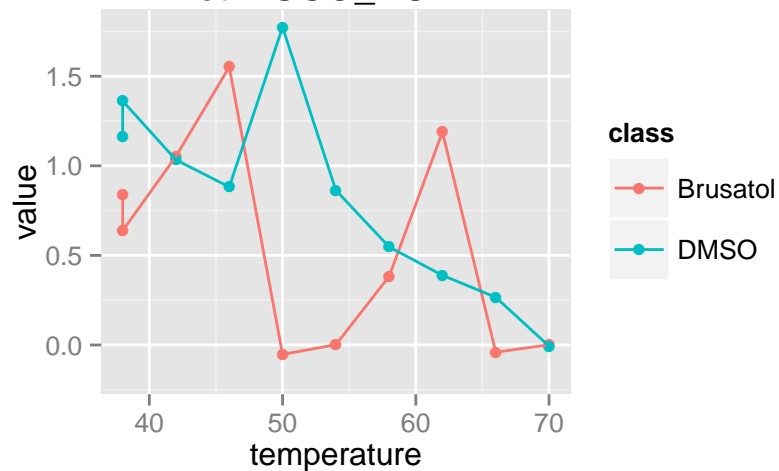

Prot: FUMH\_HUMAN

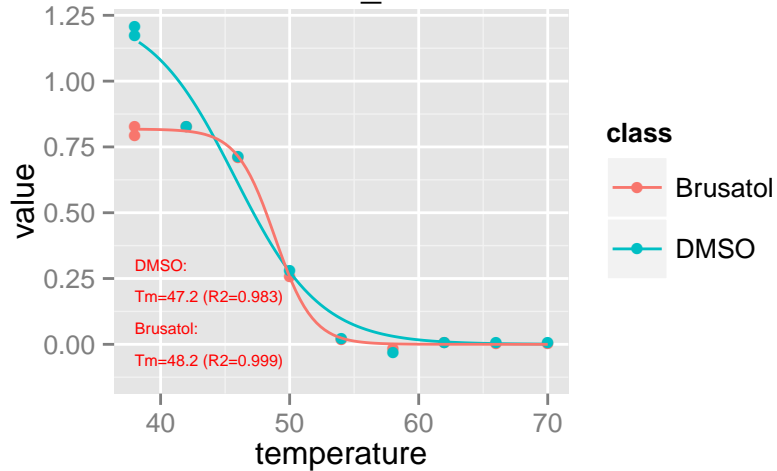

Prot: FUS\_HUMAN

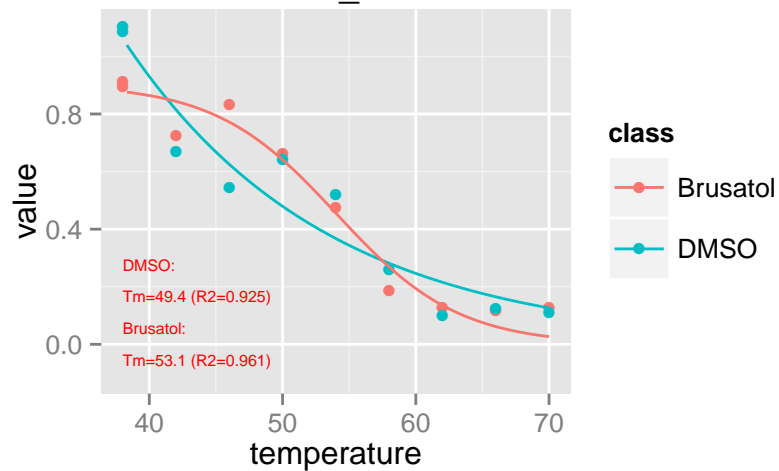

Prot: FWCH2\_HUMAN

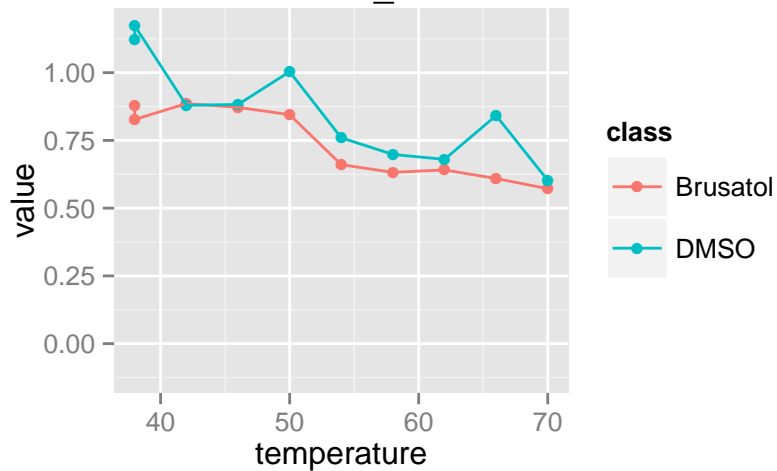

Prot: FXL18\_HUMAN

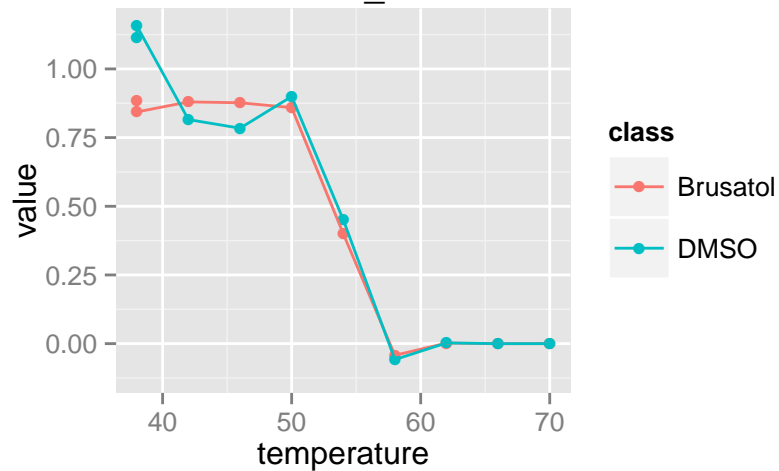

Prot: FXR2\_HUMAN

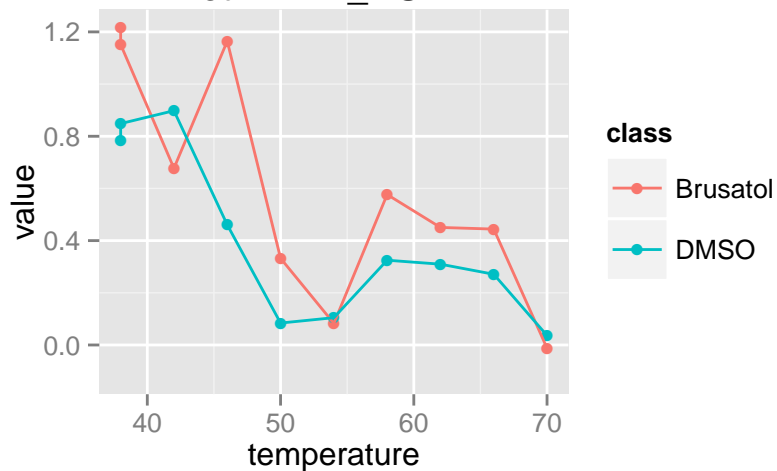

Prot: FYN\_HUMAN

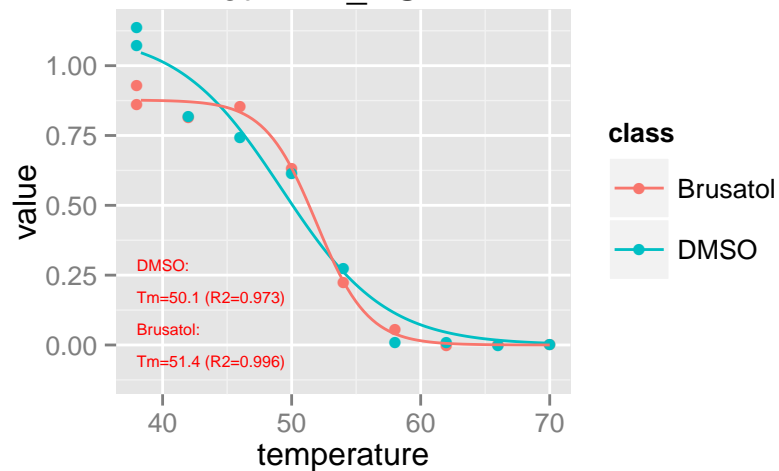

Prot: FYV1\_HUMAN

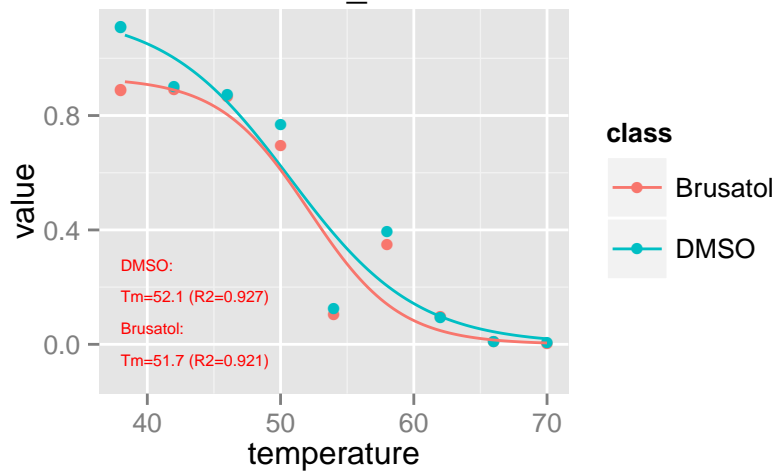

Prot: G3BP1\_HUMAN

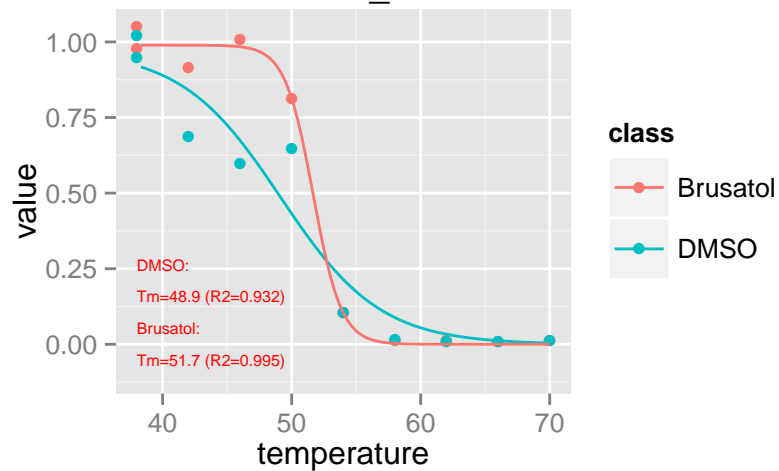

Prot: G3BP2\_HUMAN

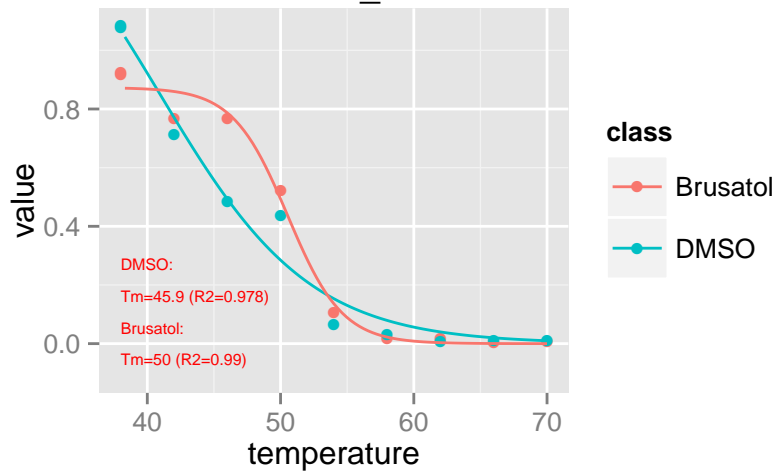

Prot: G3P\_HUMAN

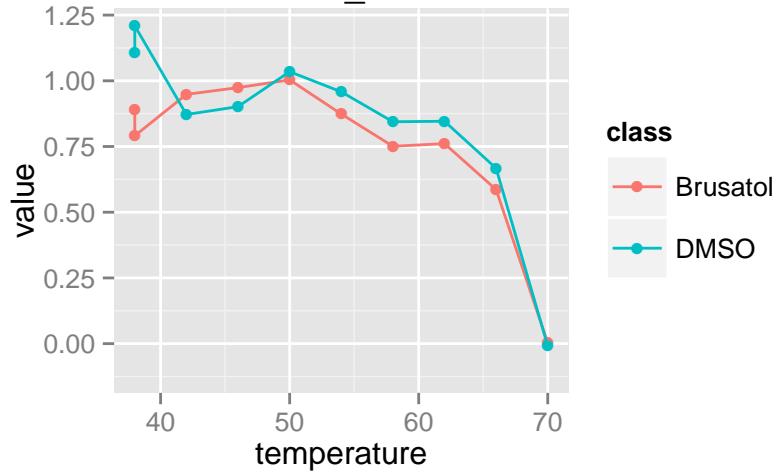

Prot: G3PT\_HUMAN

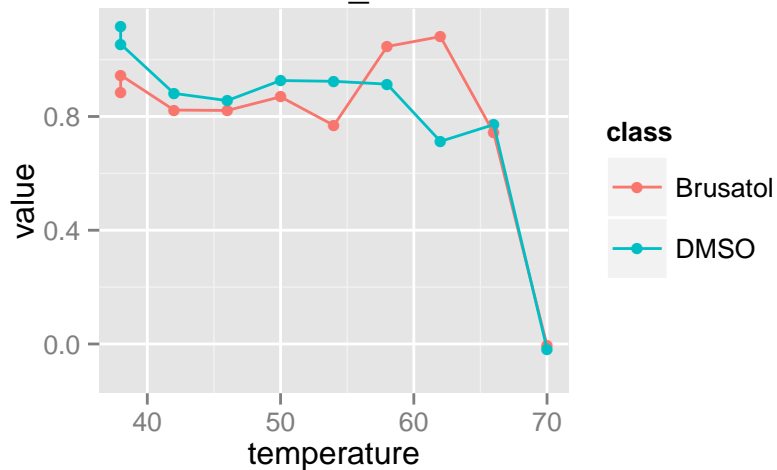

Prot: G45IP\_HUMAN

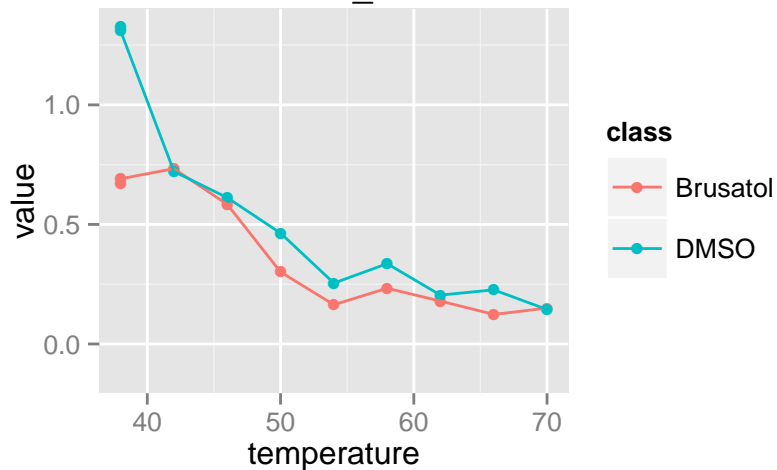

Prot: G6PD\_HUMAN

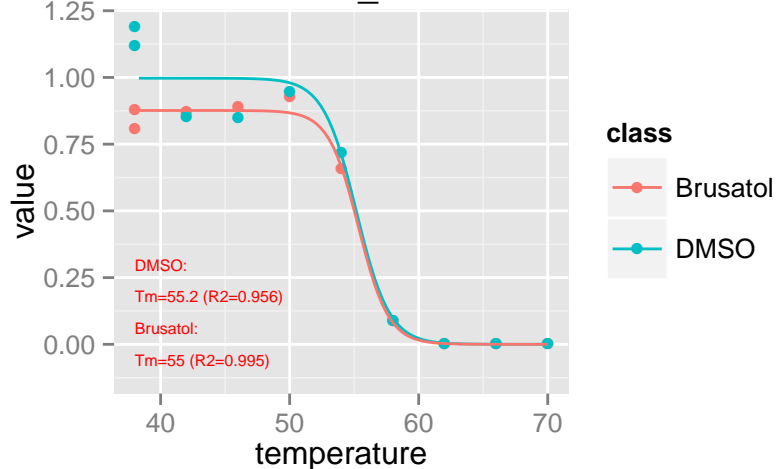

Prot: G6PI\_HUMAN

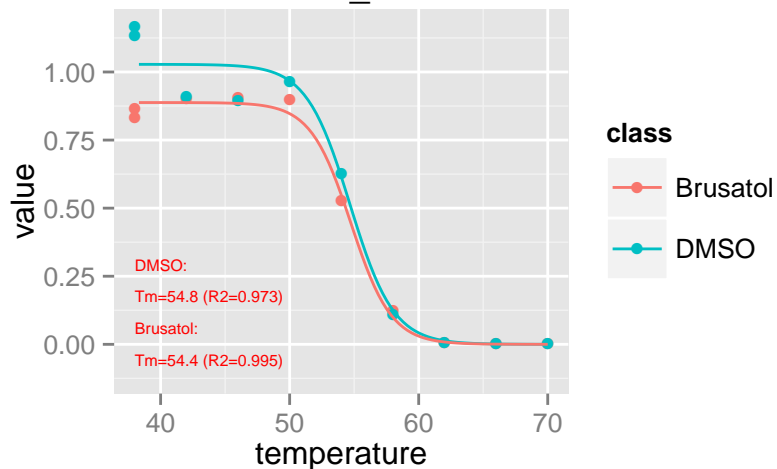

Prot: GABPA\_HUMAN

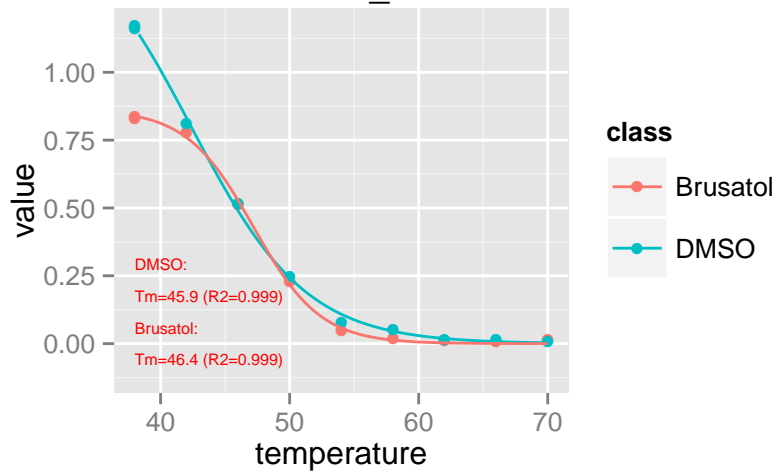

Prot: GAK\_HUMAN

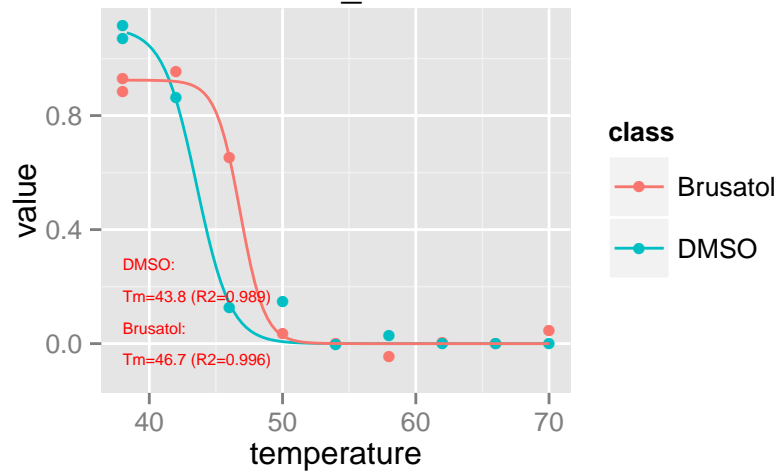

Prot: GALE\_HUMAN

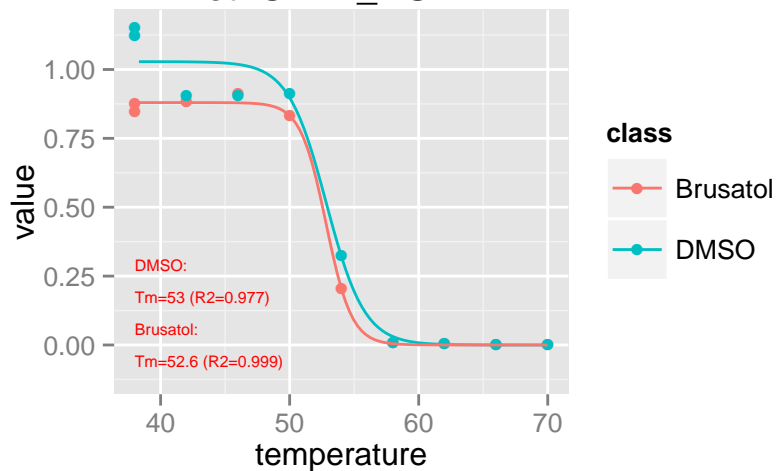

Prot: GALK1\_HUMAN

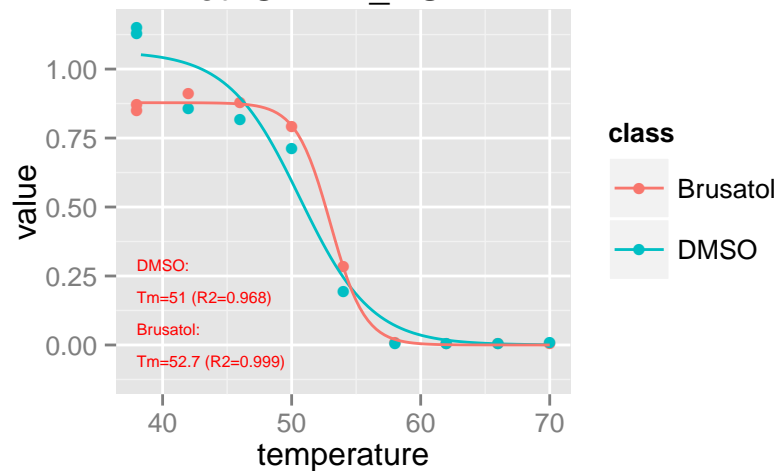

Prot: GALK2\_HUMAN

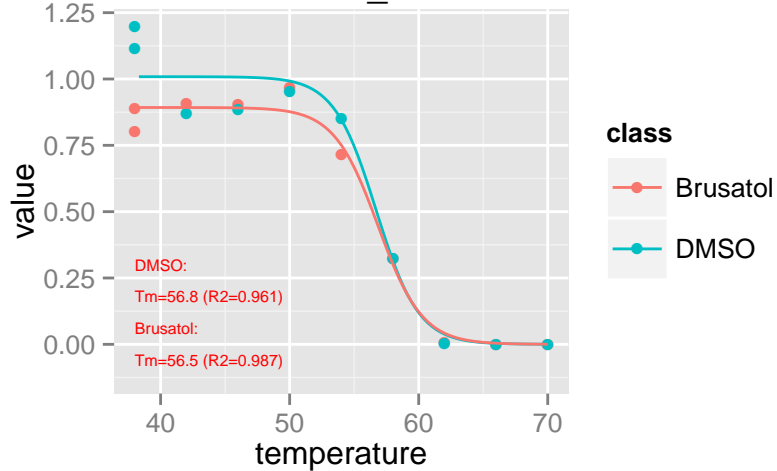

Prot: GALM\_HUMAN

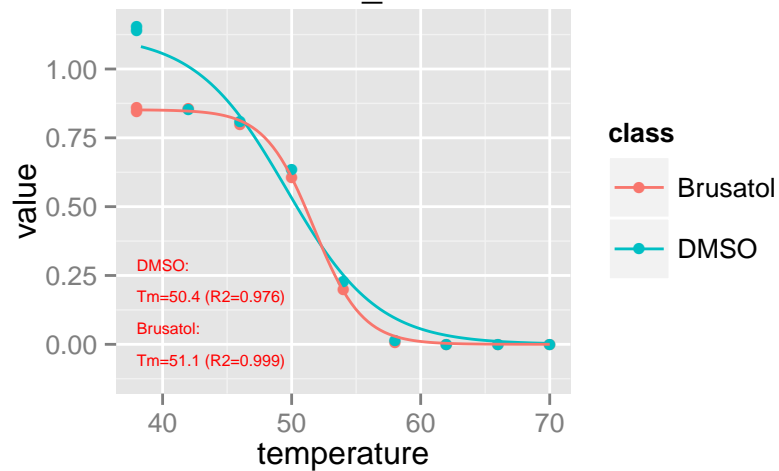

Prot: GALNS\_HUMAN

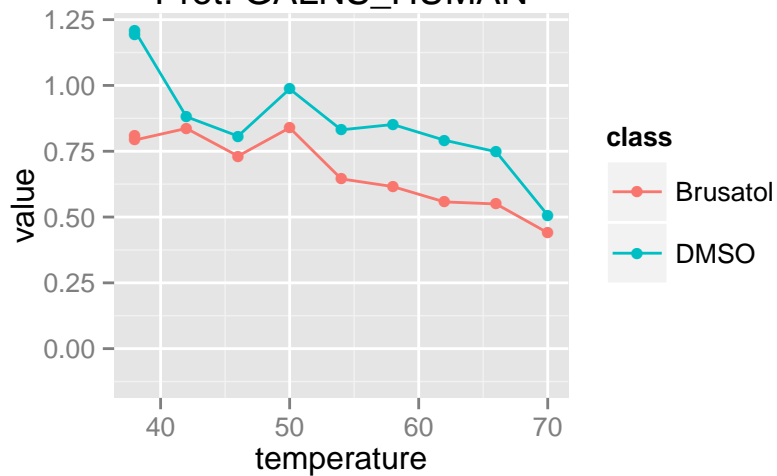

Prot: GALT\_HUMAN

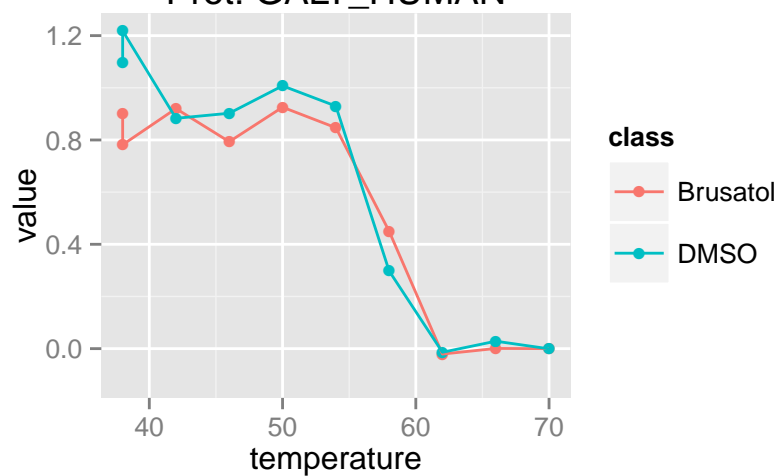

Prot: GANAB\_HUMAN

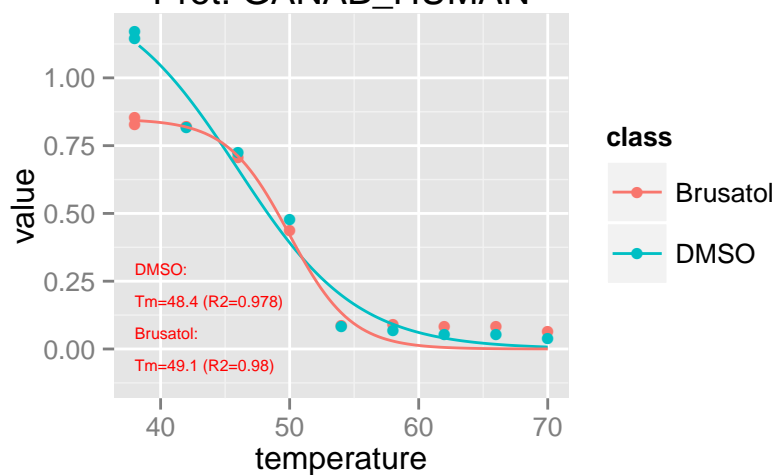

Prot: GAPD1\_HUMAN

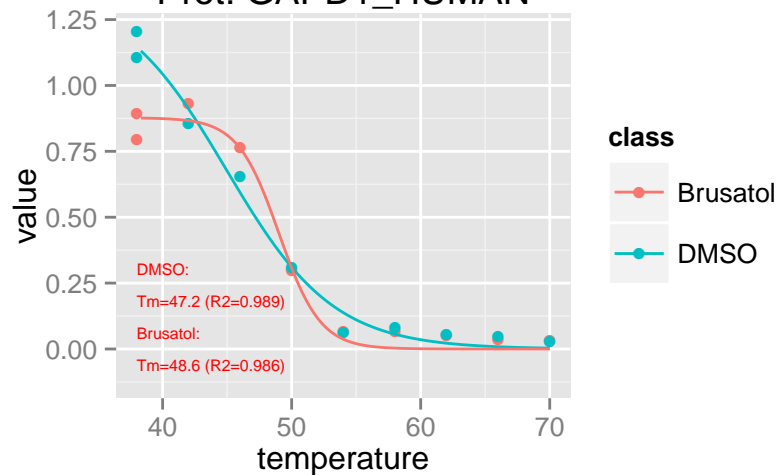

Prot: GATC\_HUMAN

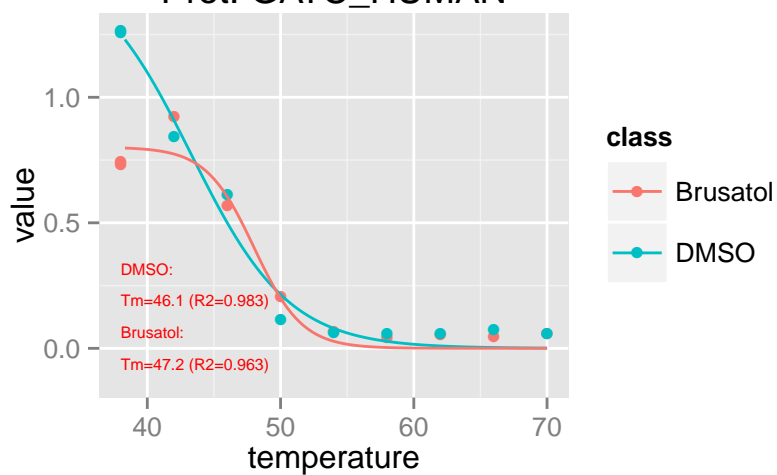

Prot: GBB1\_HUMAN

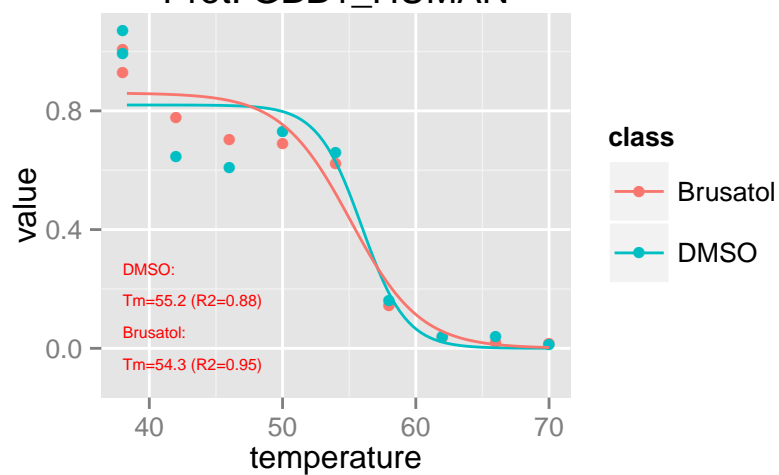

Prot: GBF1\_HUMAN

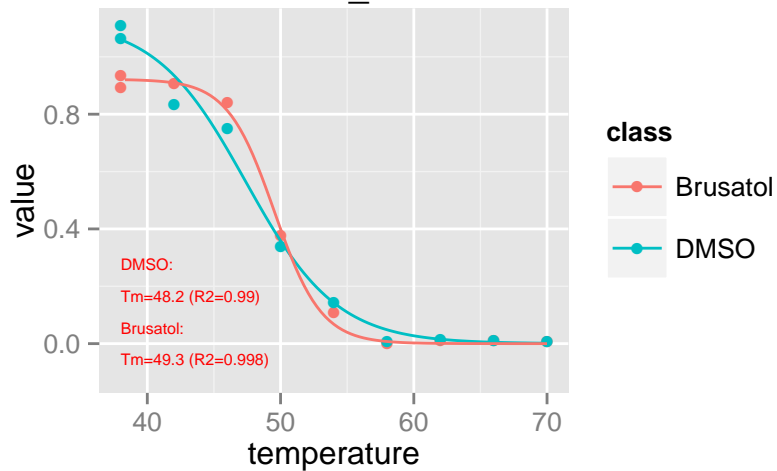

Prot: GBG12\_HUMAN

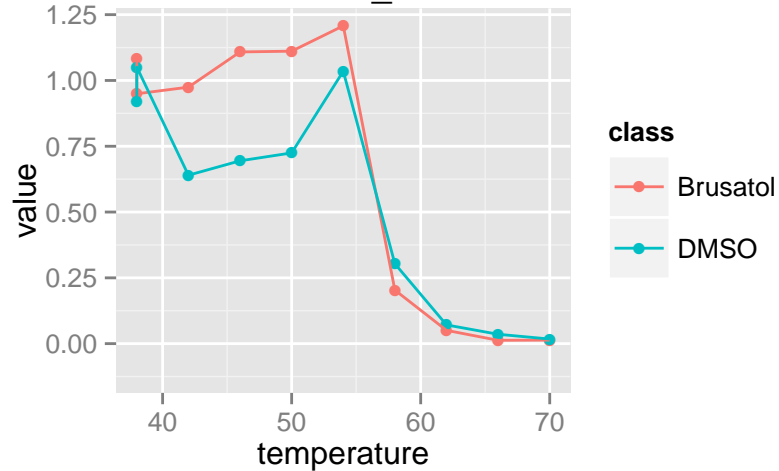

Prot: GBG5\_HUMAN

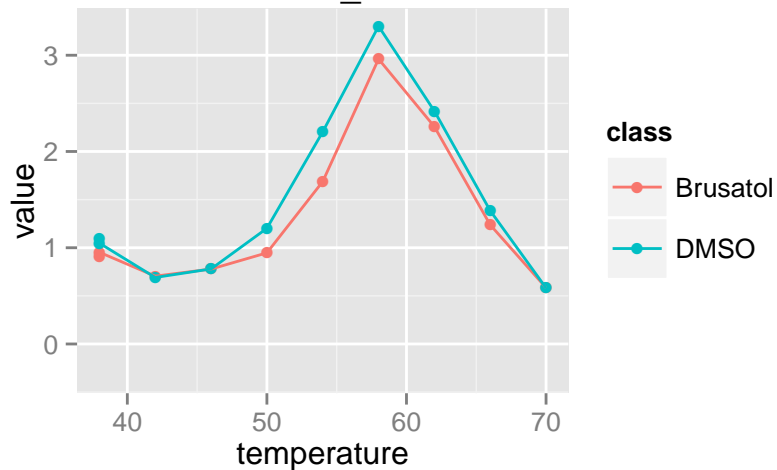

Prot: GBLP\_HUMAN

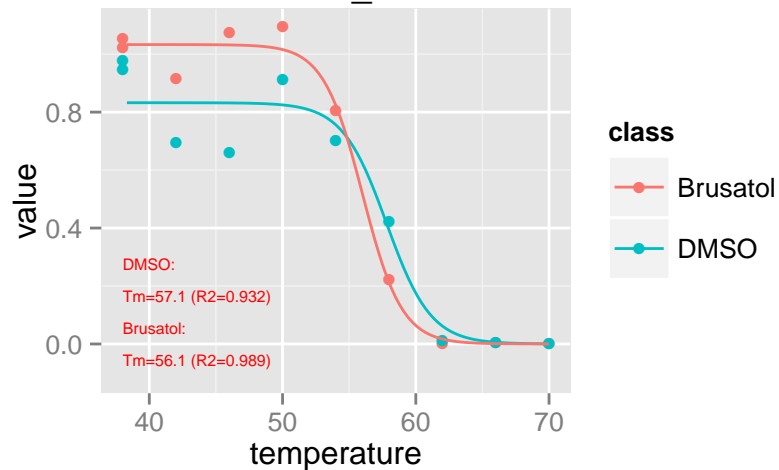

Prot: GCC1\_HUMAN

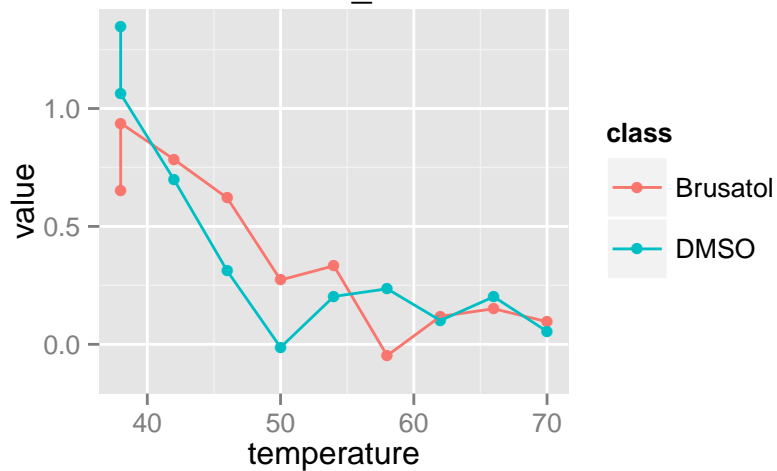

Prot: GCC2\_HUMAN

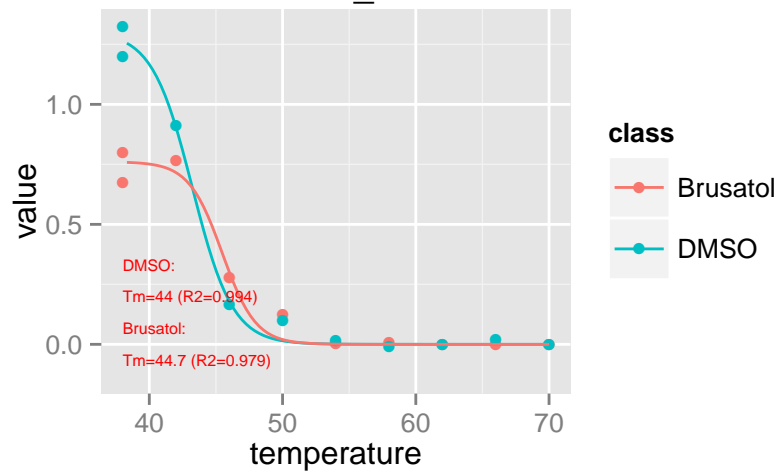



Prot: GCDH\_HUMAN

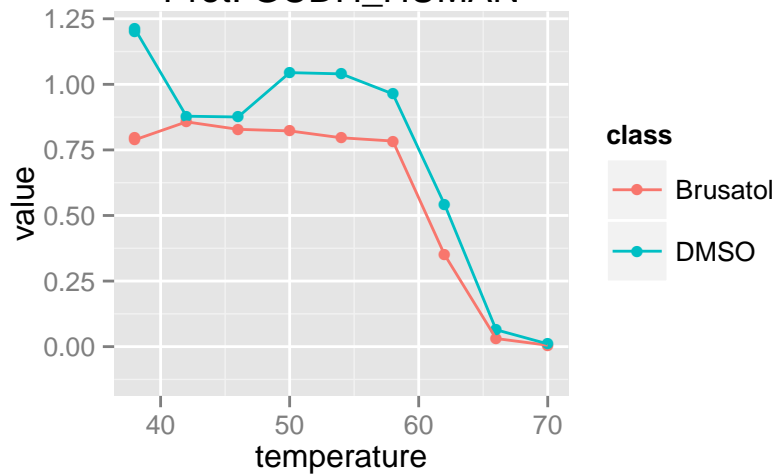

Prot: GCF\_HUMAN

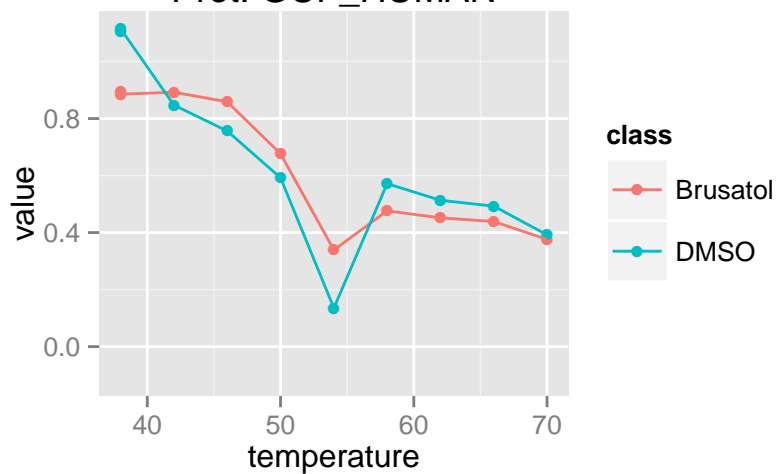

Prot: GCN1L\_HUMAN

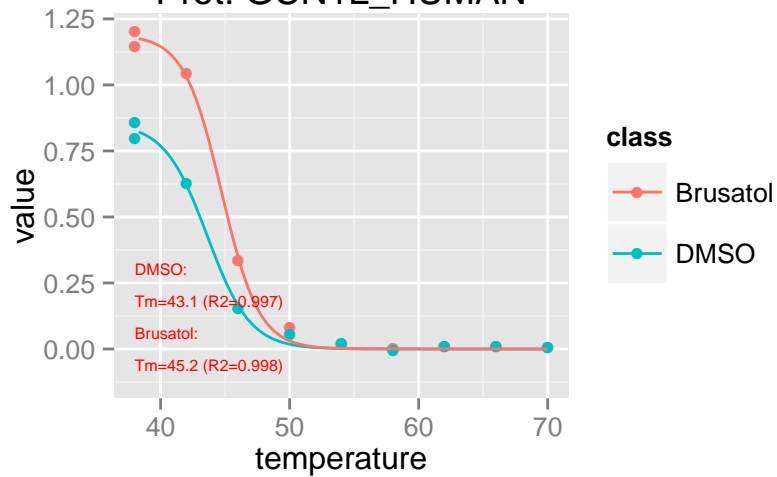

Prot: GCP2\_HUMAN

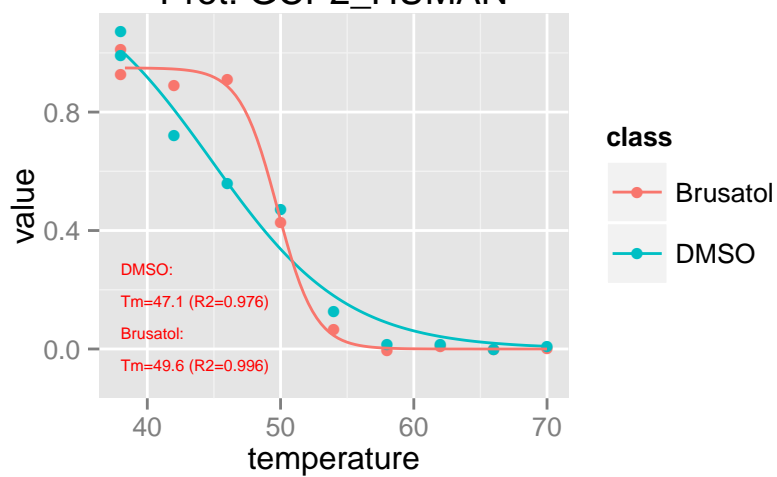

Prot: GCP60\_HUMAN

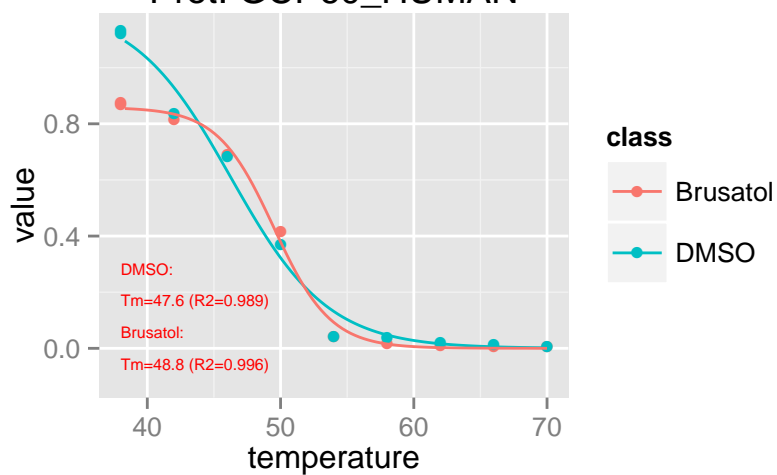

Prot: GCR\_HUMAN

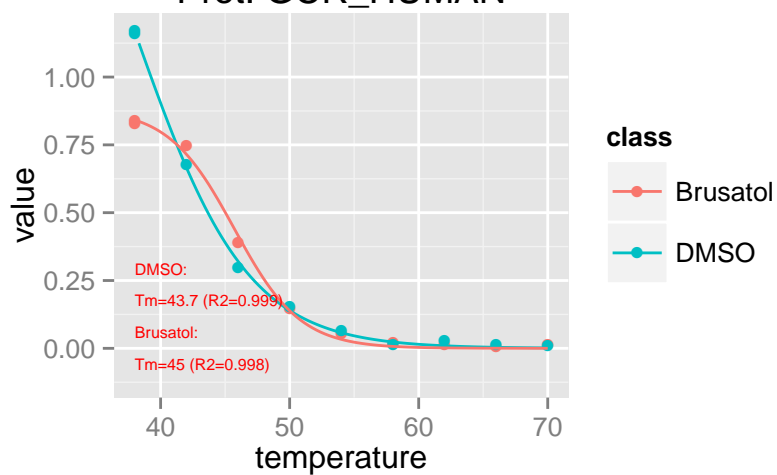

Prot: GCSH\_HUMAN

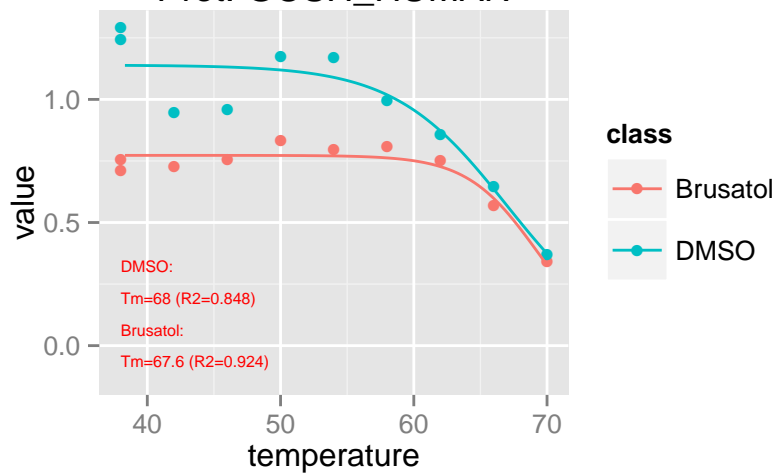

Prot: GCSP\_HUMAN

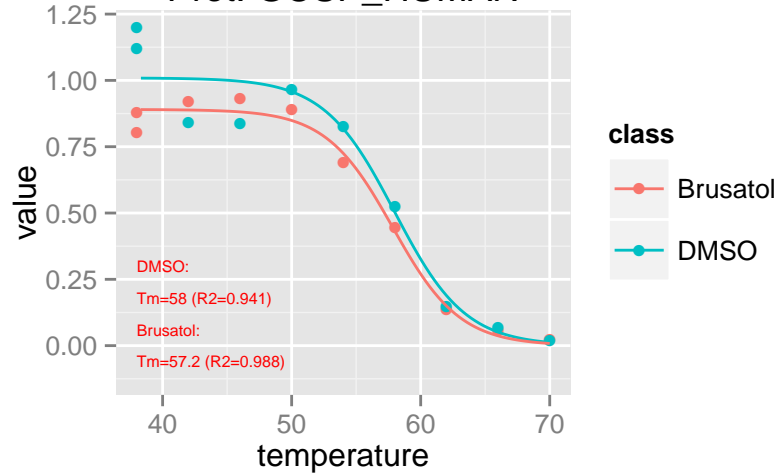

Prot: GDE\_HUMAN

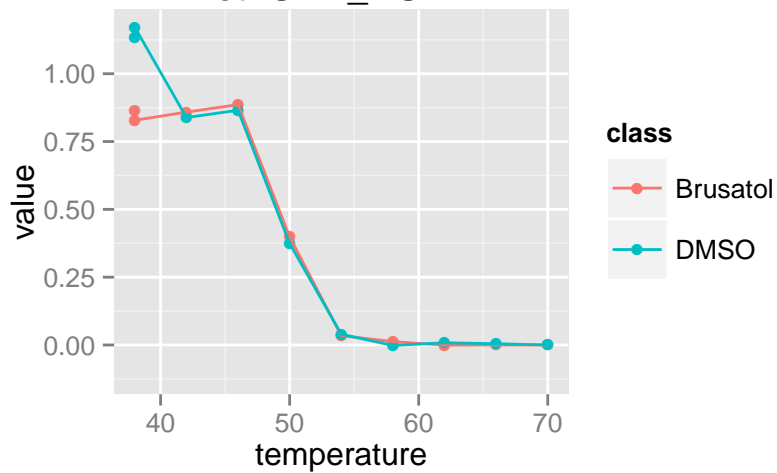

Prot: GDIA\_HUMAN

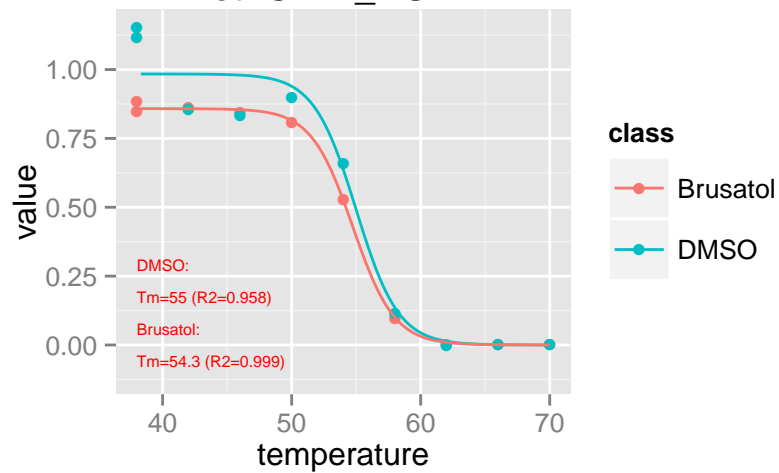

Prot: GDIB\_HUMAN

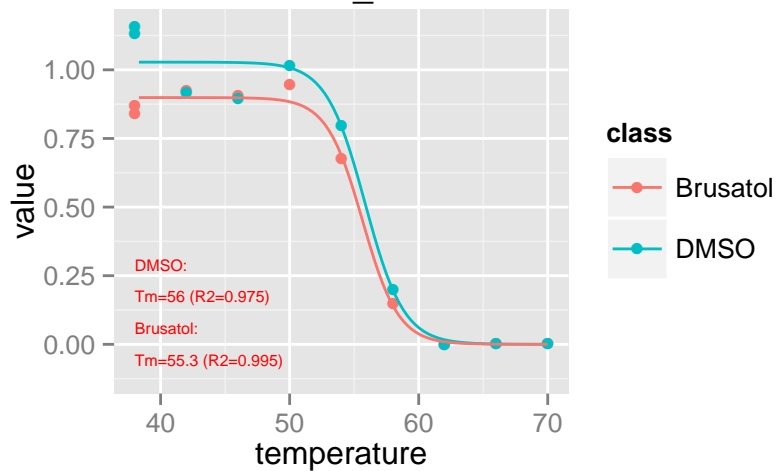

Prot: GDIR1\_HUMAN

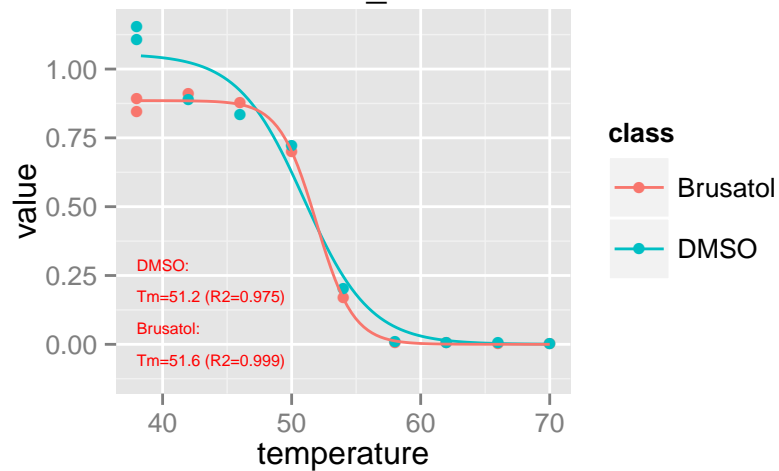

Prot: GDS1\_HUMAN

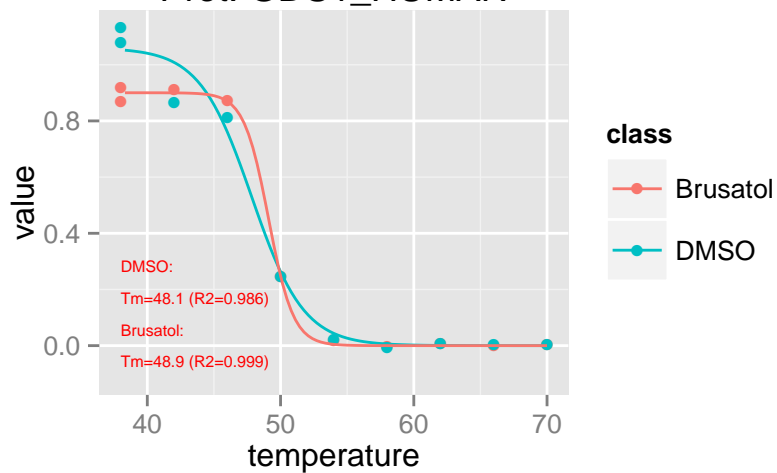

Prot: GELS\_HUMAN

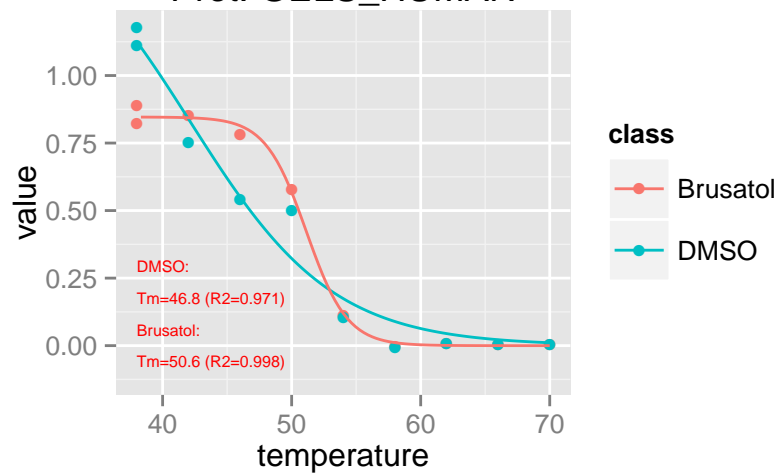

Prot: GEMI4\_HUMAN

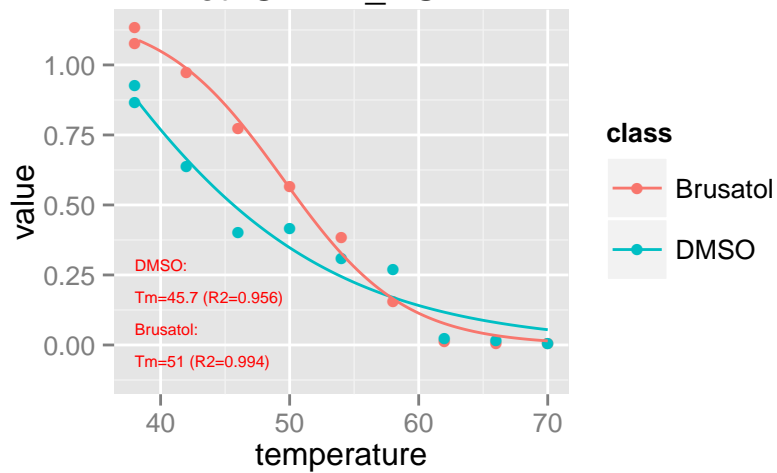

Prot: GEMI5\_HUMAN

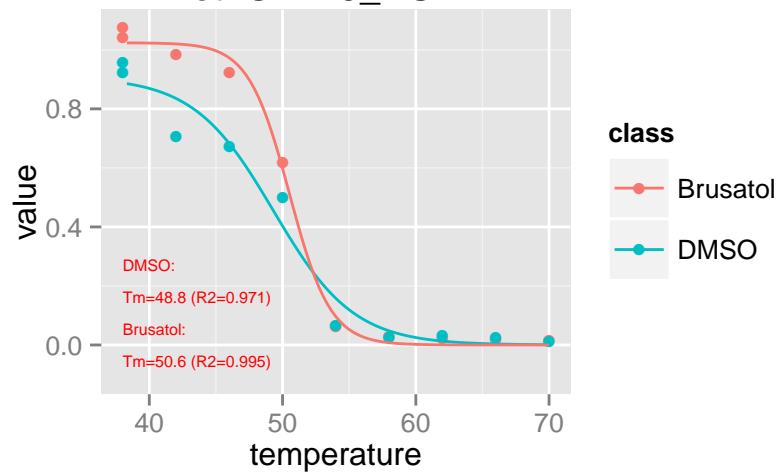

Prot: GEPH\_HUMAN

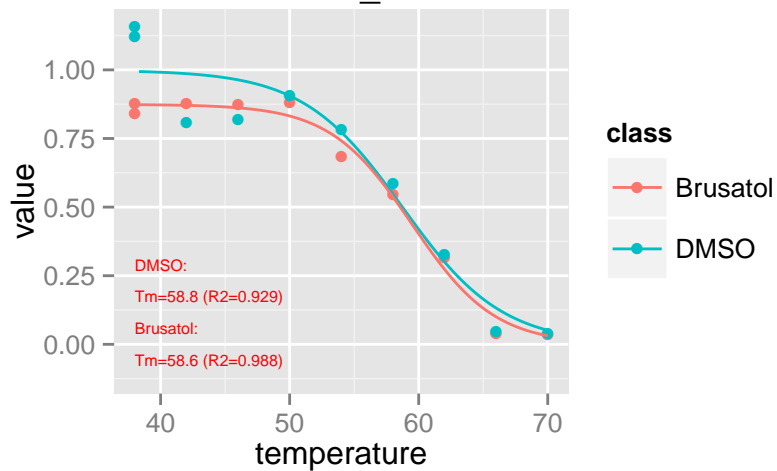

Prot: GET4\_HUMAN

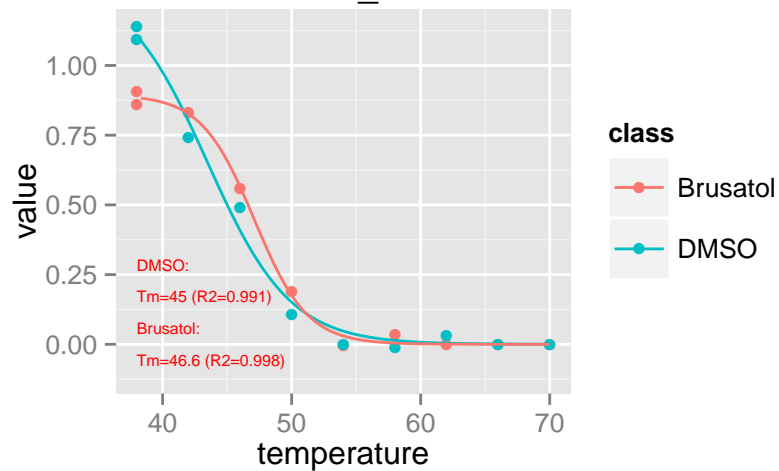

Prot: GFPT1\_HUMAN

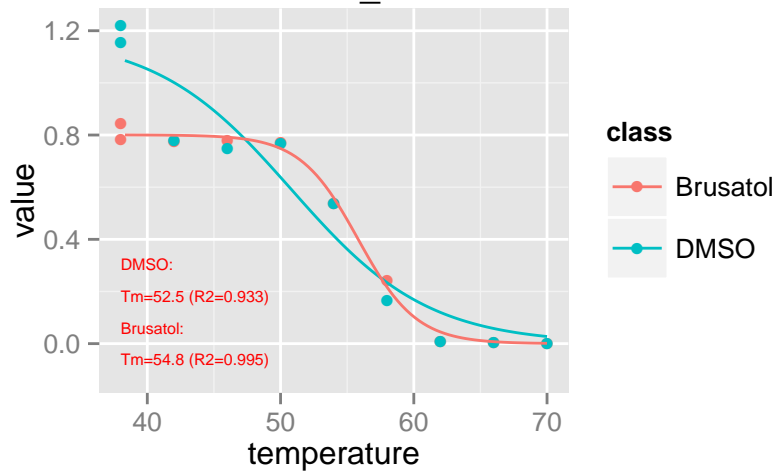

Prot: GFPT2\_HUMAN

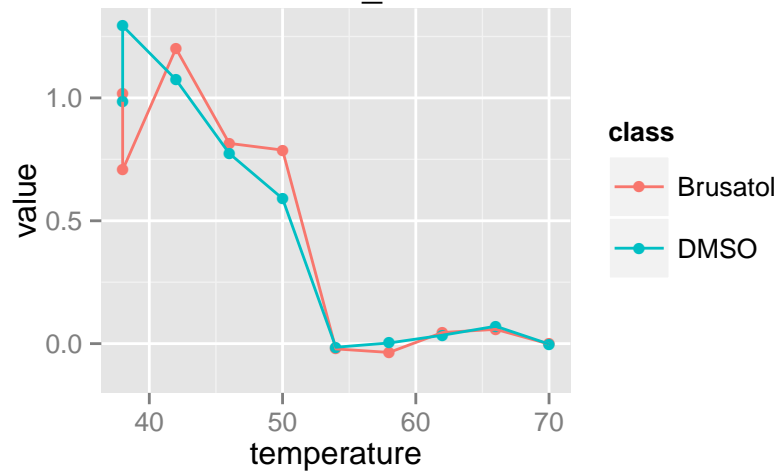

Prot: GGCT\_HUMAN

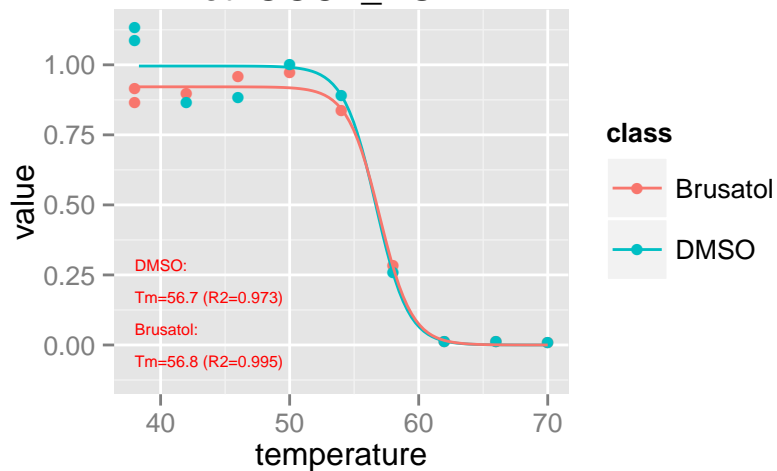

Prot: GGH\_HUMAN

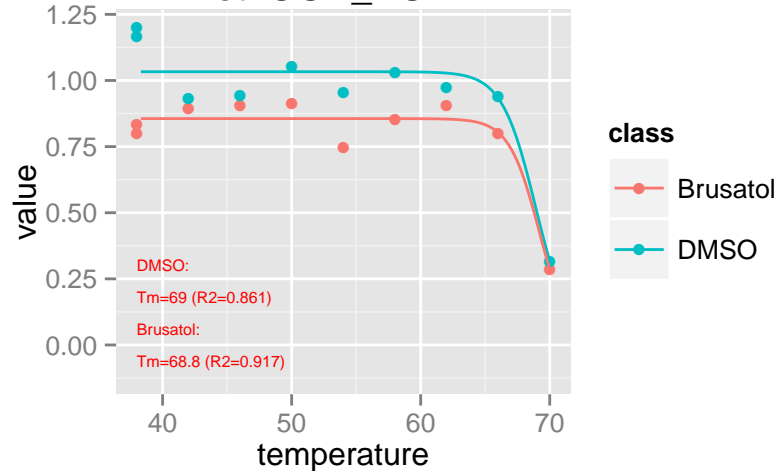

Prot: GGPPS\_HUMAN

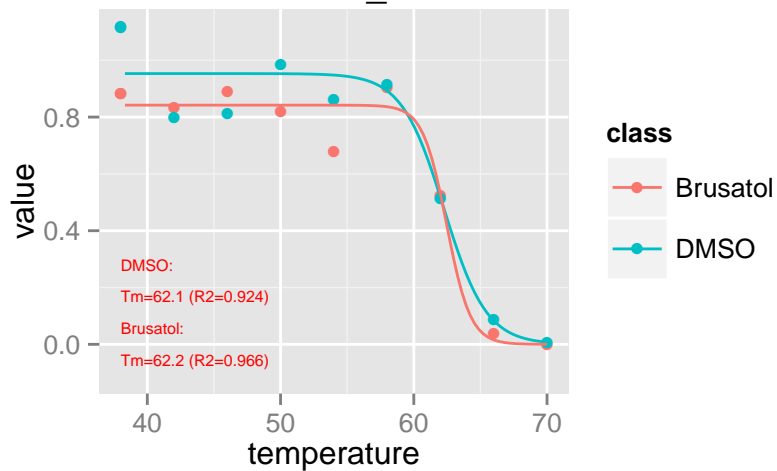

Prot: GIPC1\_HUMAN

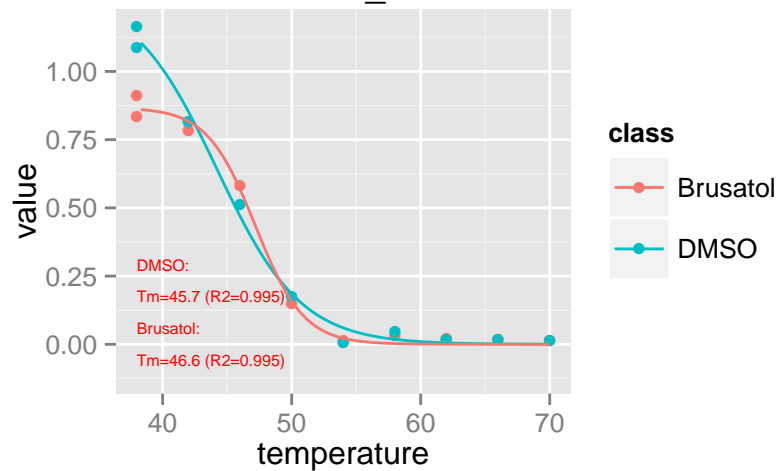

Prot: GIT1\_HUMAN

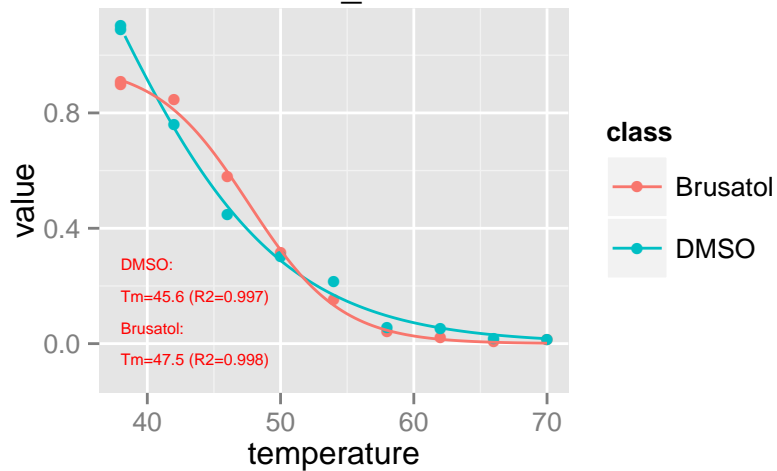

Prot: GL1AD\_HUMAN

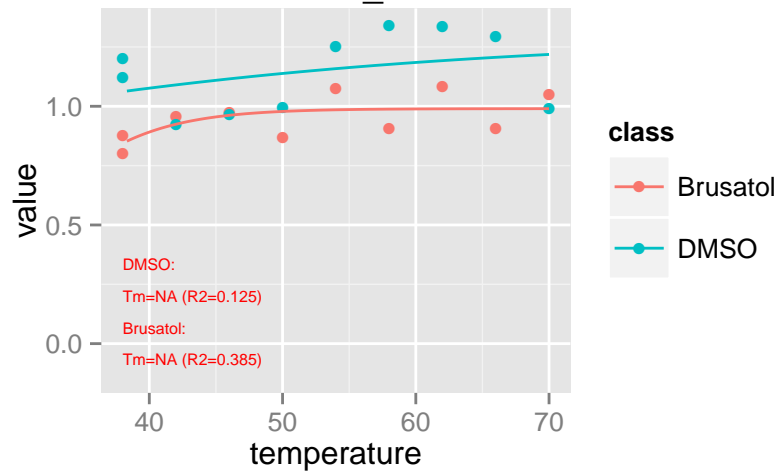

Prot: GLCM\_HUMAN

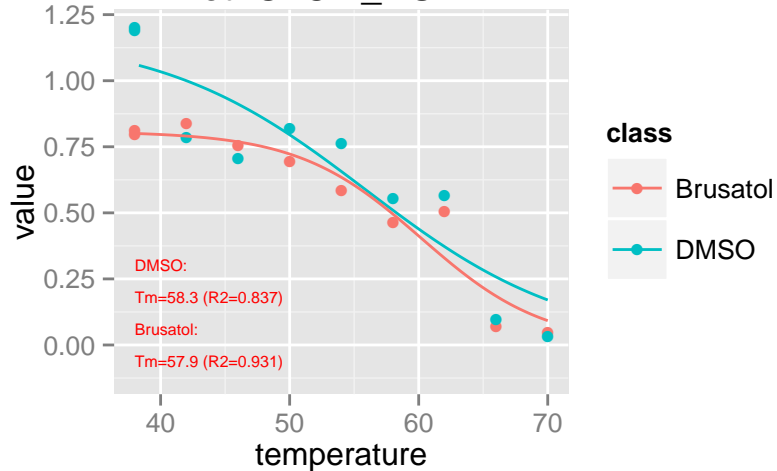

Prot: GLCNE\_HUMAN

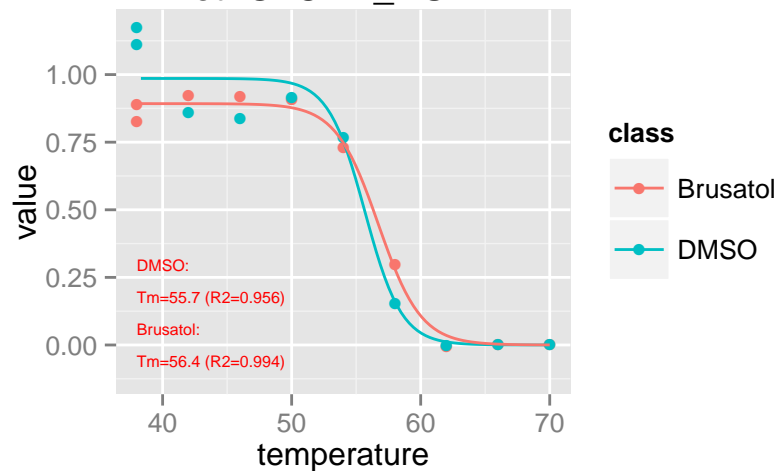

Prot: GLGB\_HUMAN

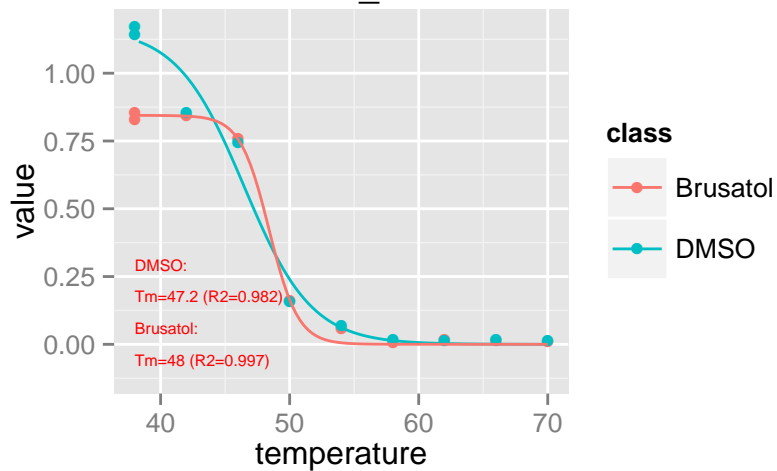

Prot: GLMN\_HUMAN

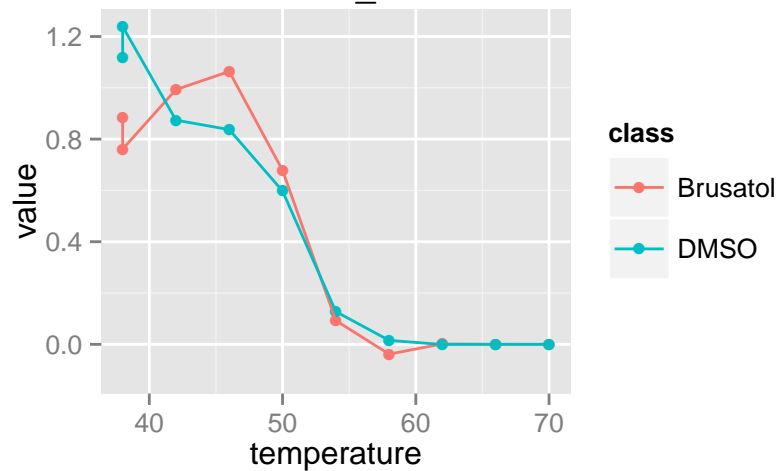

Prot: GLO2\_HUMAN

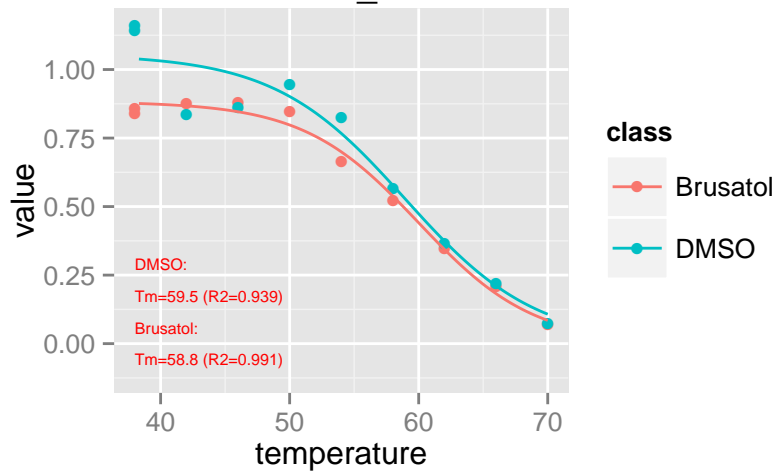

Prot: GLOD4\_HUMAN

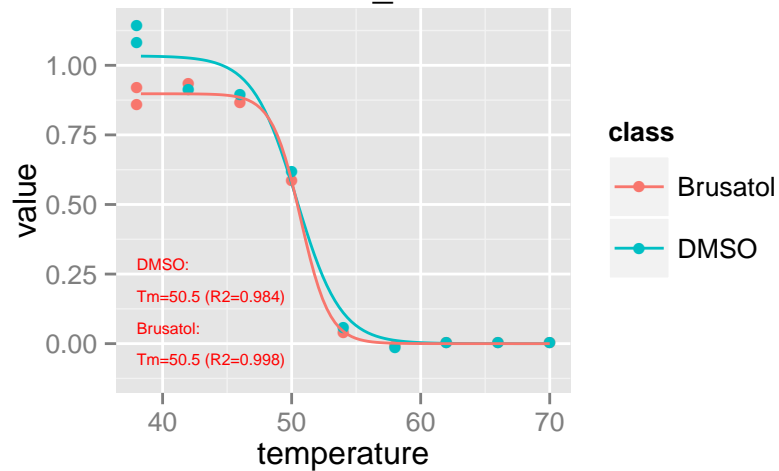

Prot: GLRX1\_HUMAN

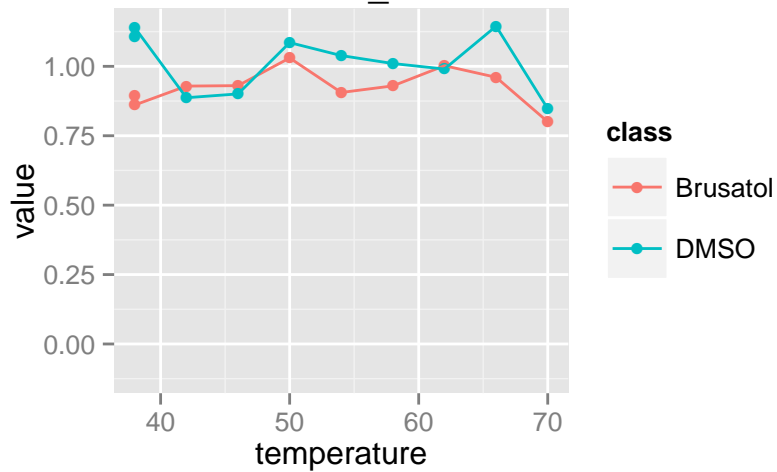

Prot: GLRX3\_HUMAN

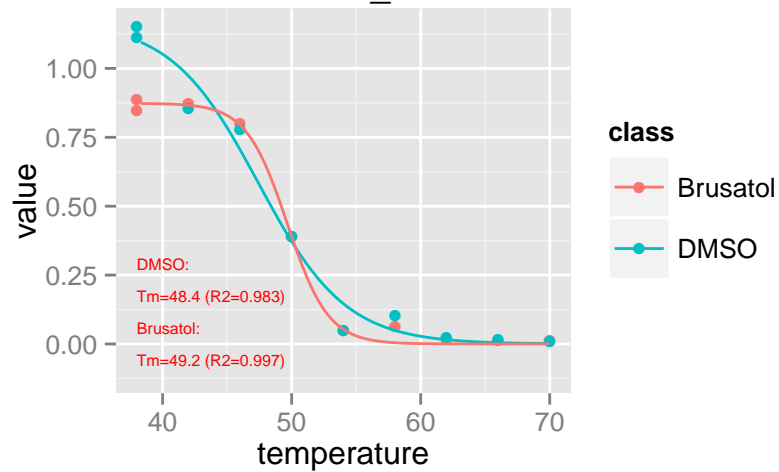

Prot: GLRX5\_HUMAN

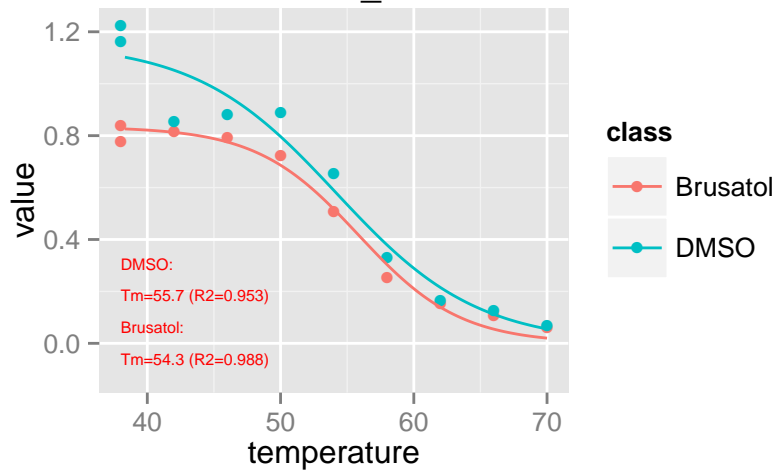

Prot: GLSK\_HUMAN

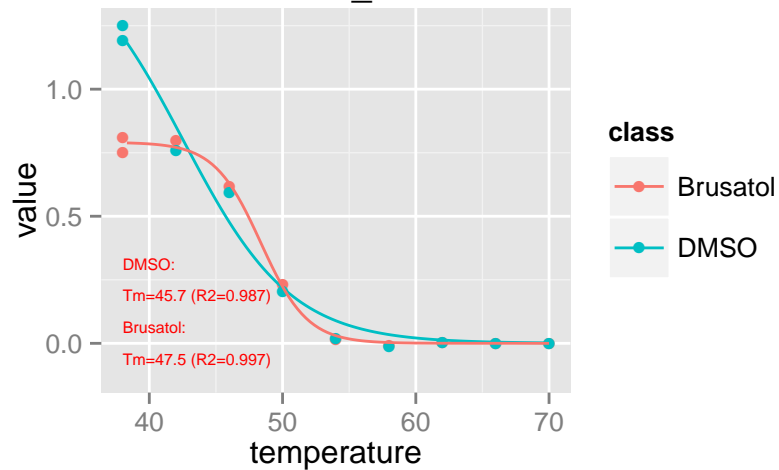

Prot: GLTP\_HUMAN

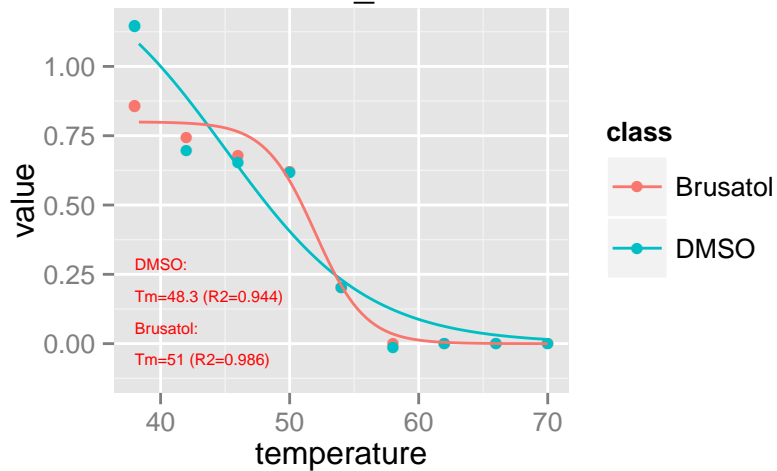

Prot: GLU2B\_HUMAN

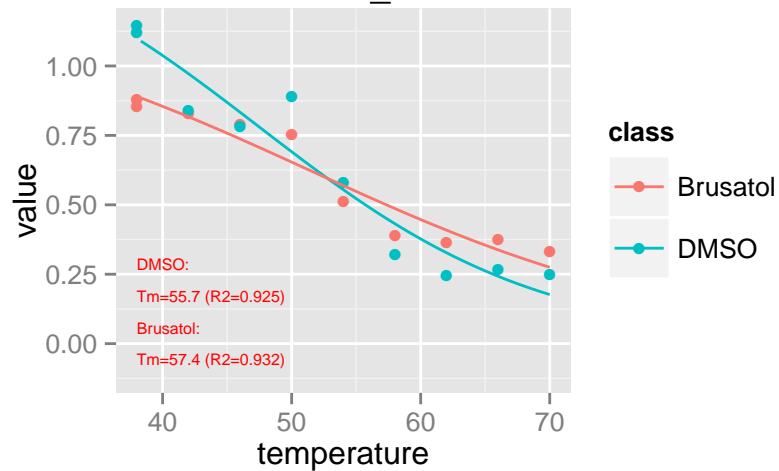

Prot: GLYC\_HUMAN

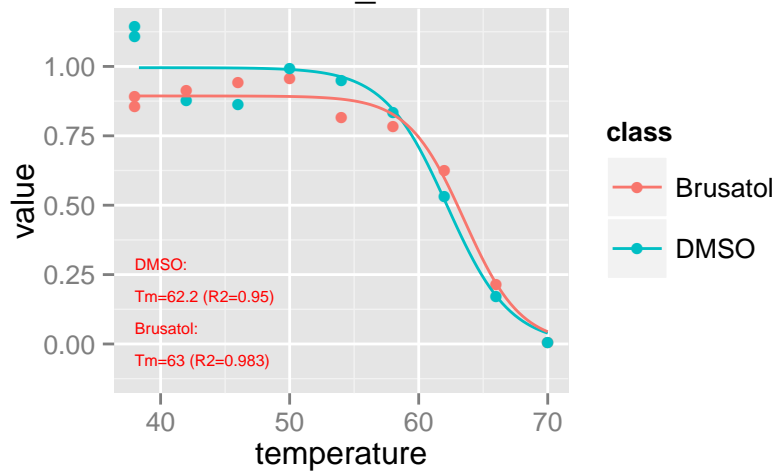

Prot: GLYG\_HUMAN

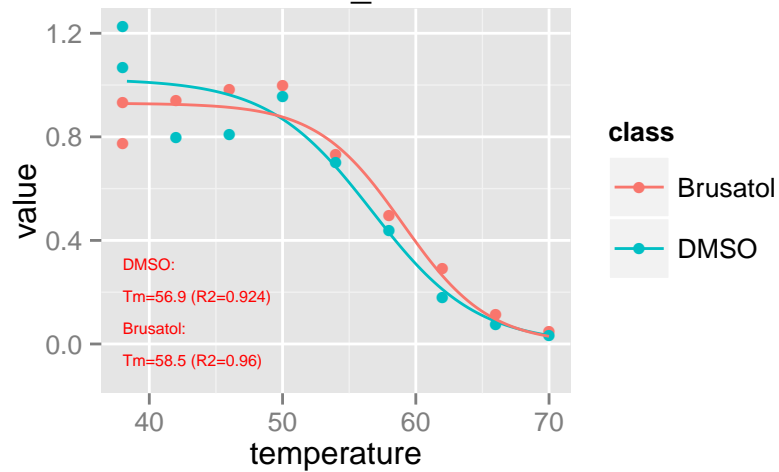

Prot: GLYM\_HUMAN

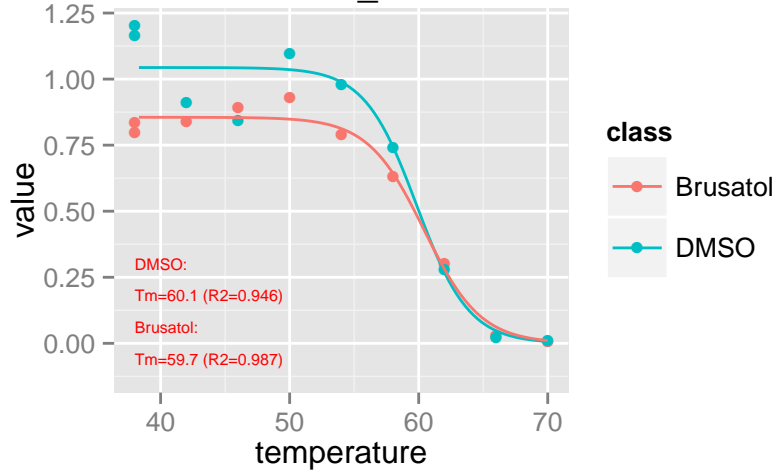

Prot: GMDS\_HUMAN

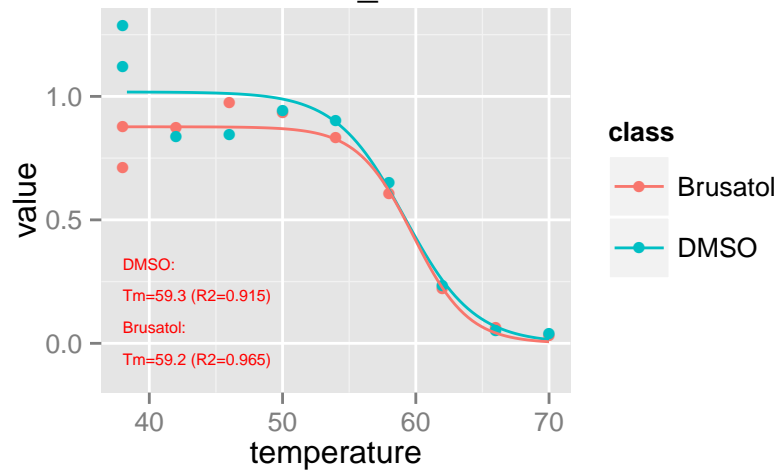

Prot: GMFB\_HUMAN

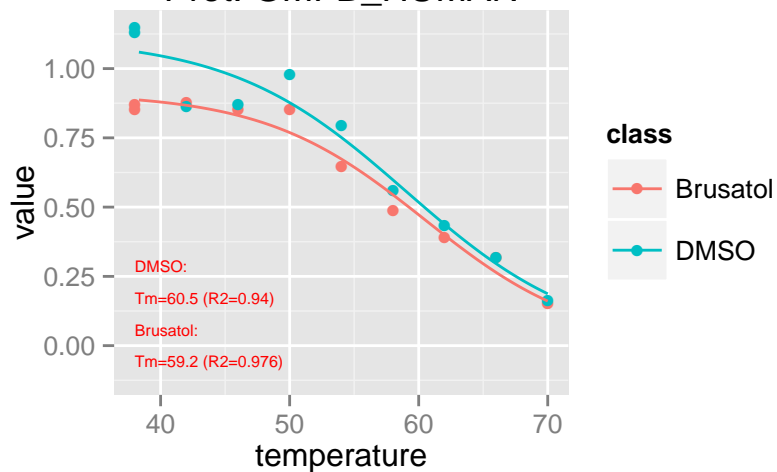

Prot: GMPPA\_HUMAN

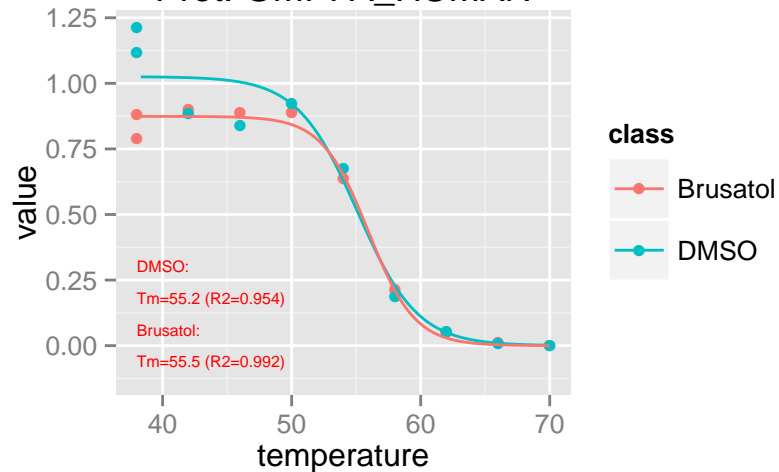

Prot: GMPPB\_HUMAN

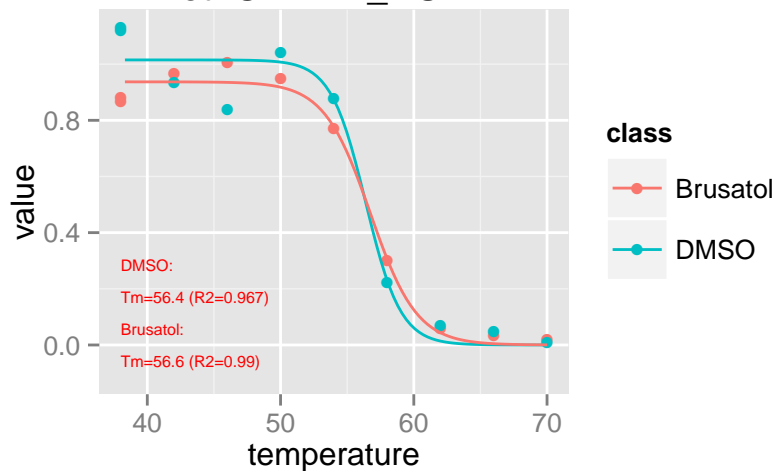

Prot: GMPR1\_HUMAN

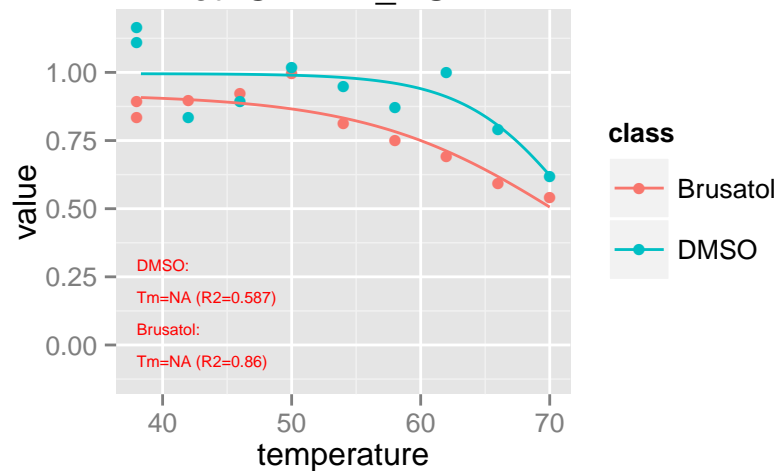

Prot: GMPR2\_HUMAN

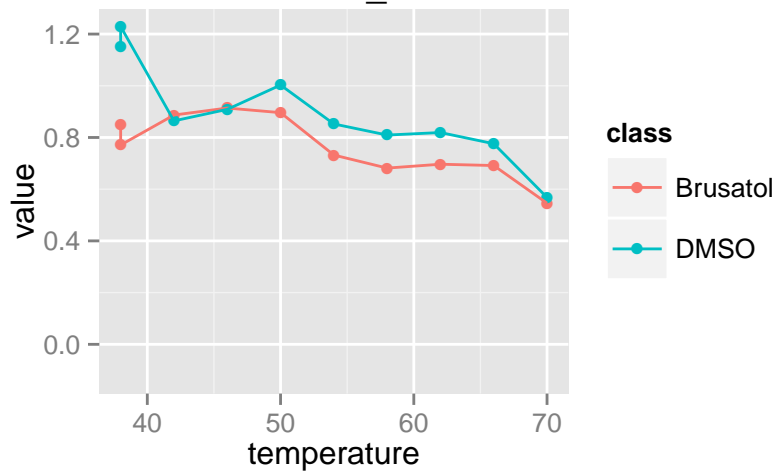

Prot: GNA1\_HUMAN

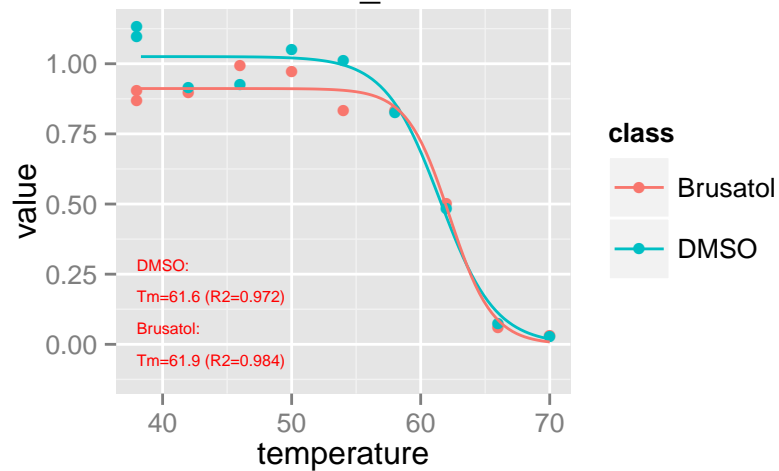



Prot: GNAS1\_HUMAN

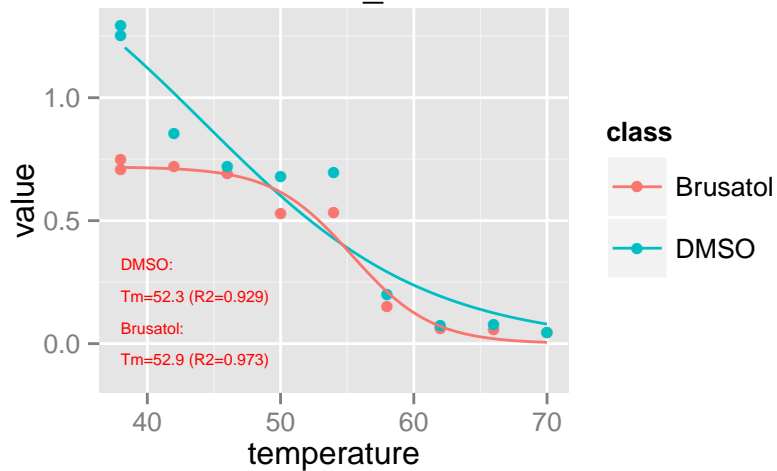

Prot: GNB1L\_HUMAN

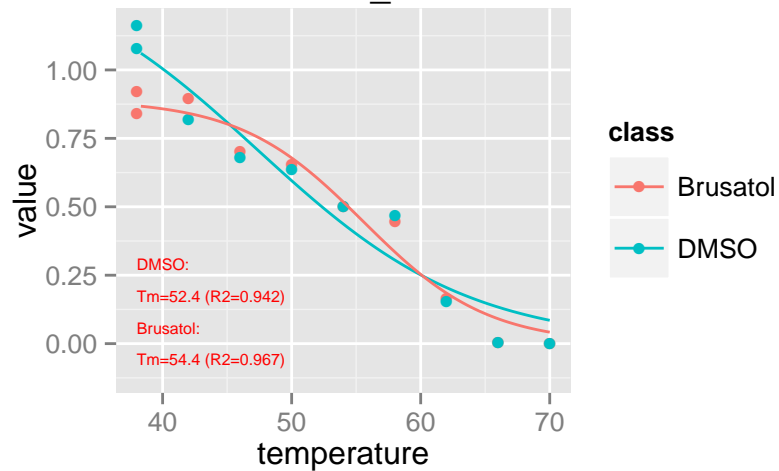

Prot: GNL1\_HUMAN

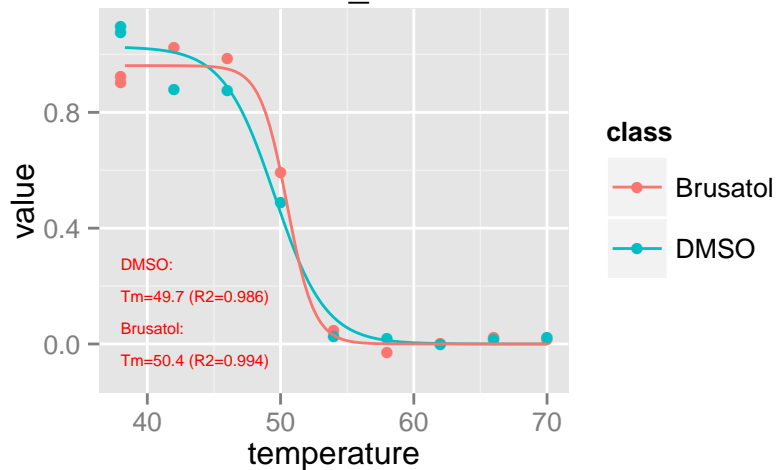

Prot: GNL3\_HUMAN

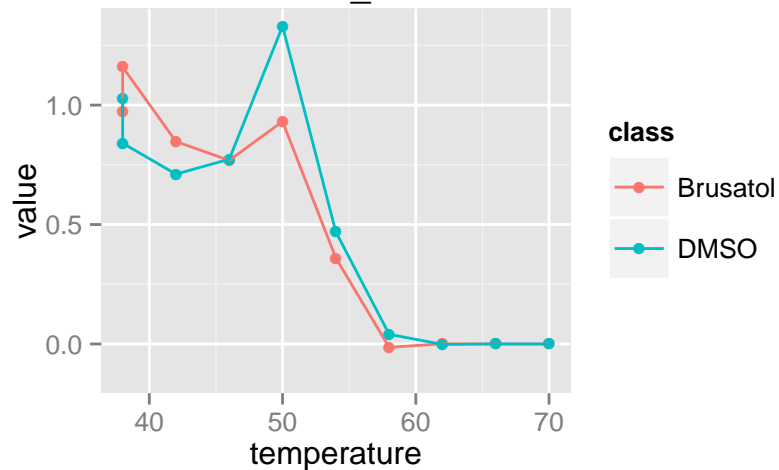

Prot: GNPI1\_HUMAN

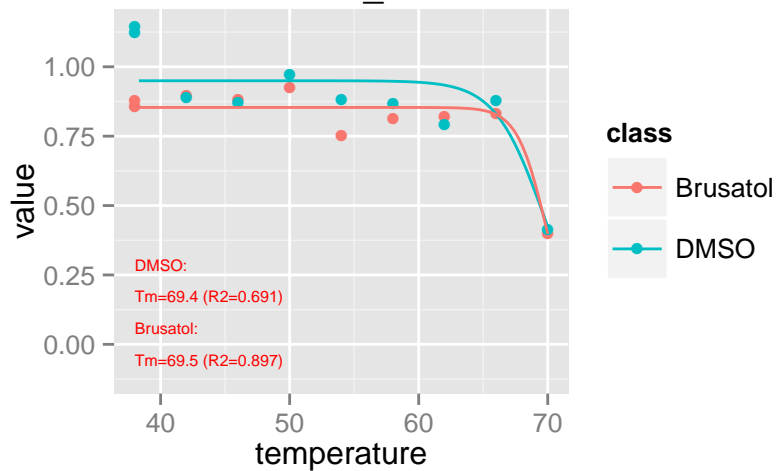

Prot: GNS\_HUMAN

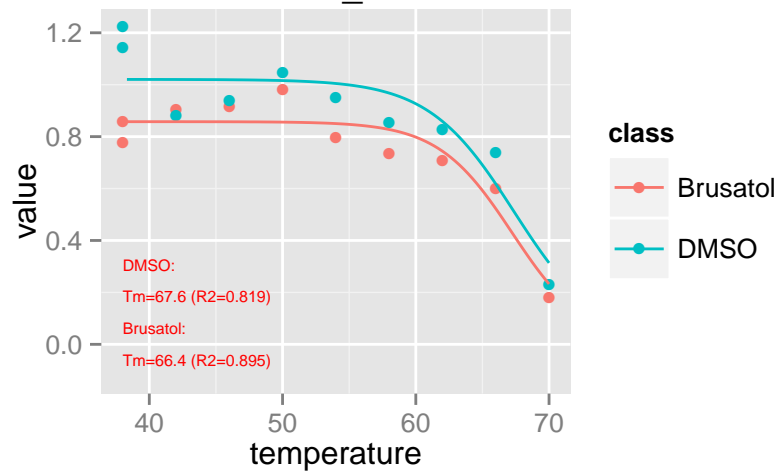

Prot: GOGA3\_HUMAN

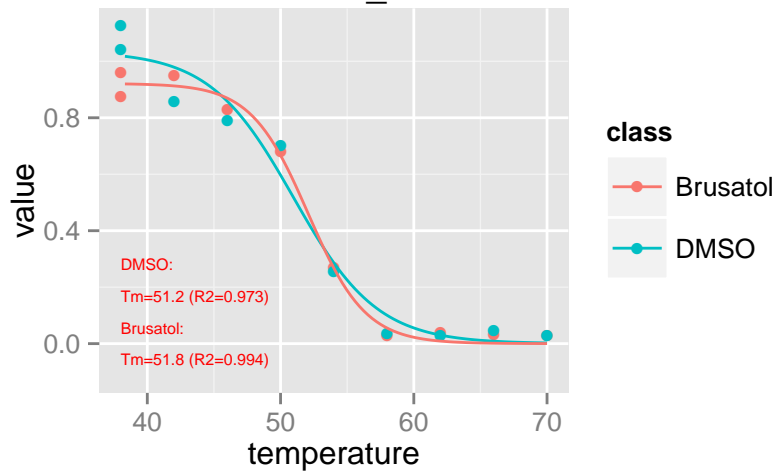

Prot: GOGA4\_HUMAN

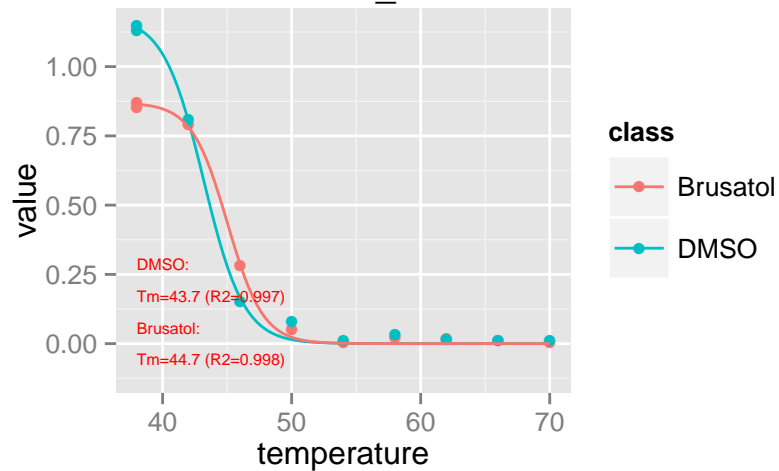

Prot: GOPC\_HUMAN

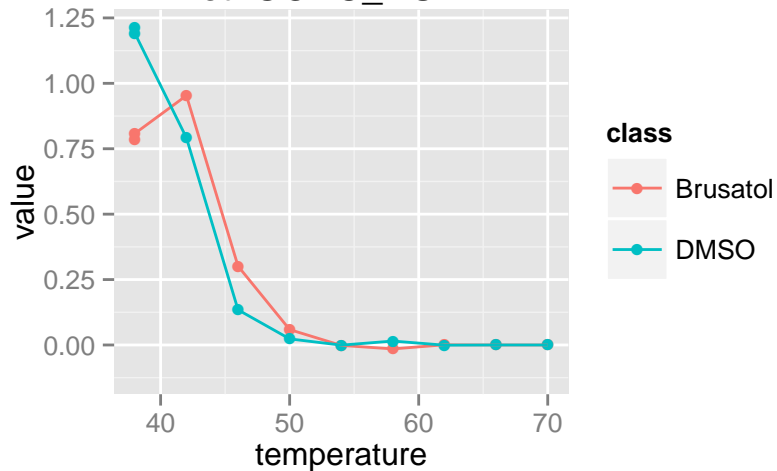

Prot: GORS2\_HUMAN

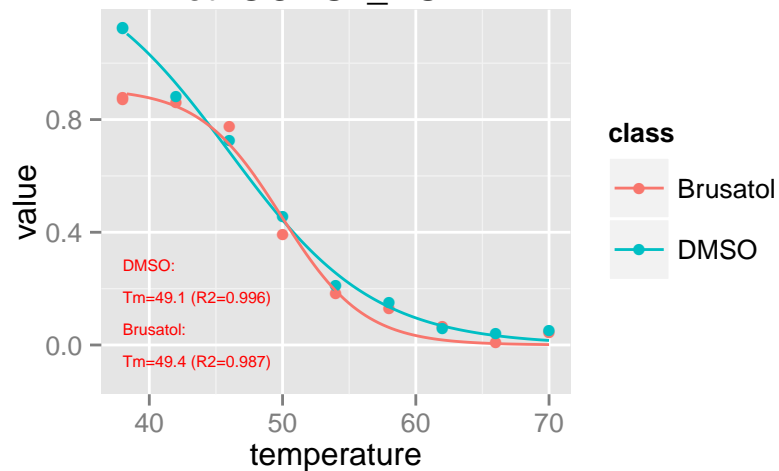

Prot: GPD1L\_HUMAN

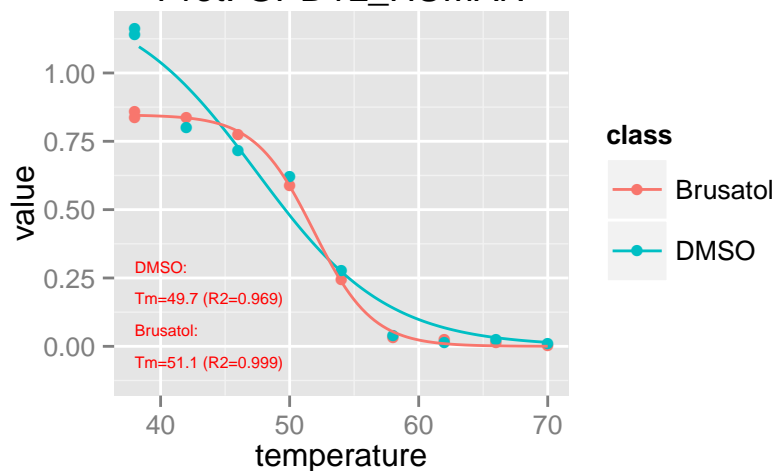

Prot: GPKOW\_HUMAN

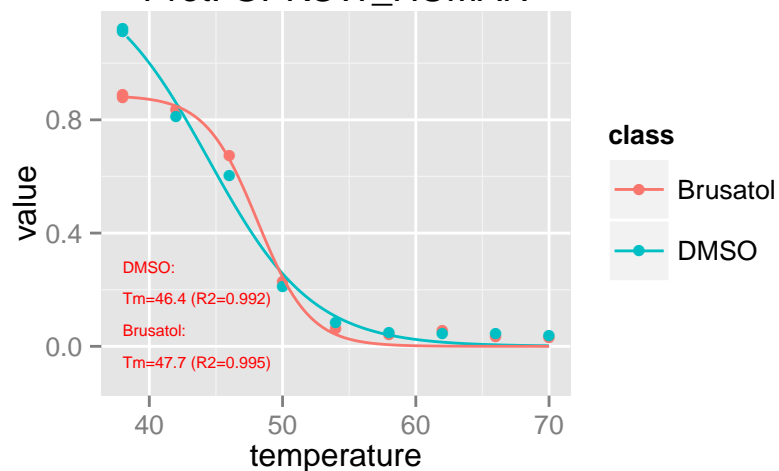

Prot: GPN1\_HUMAN

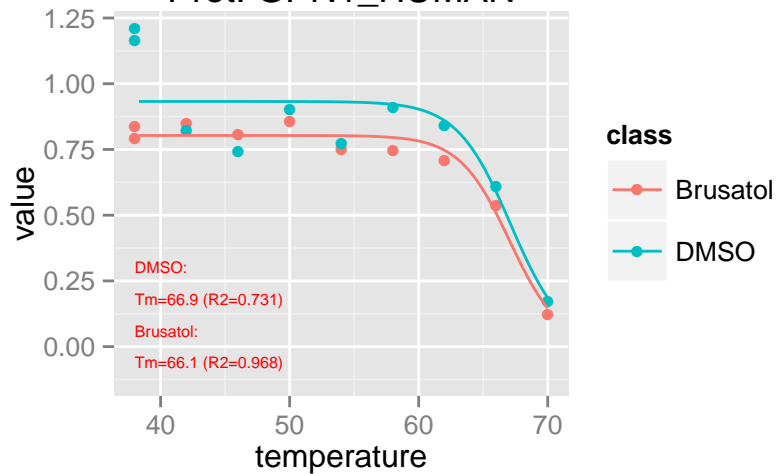

Prot: GPN3\_HUMAN

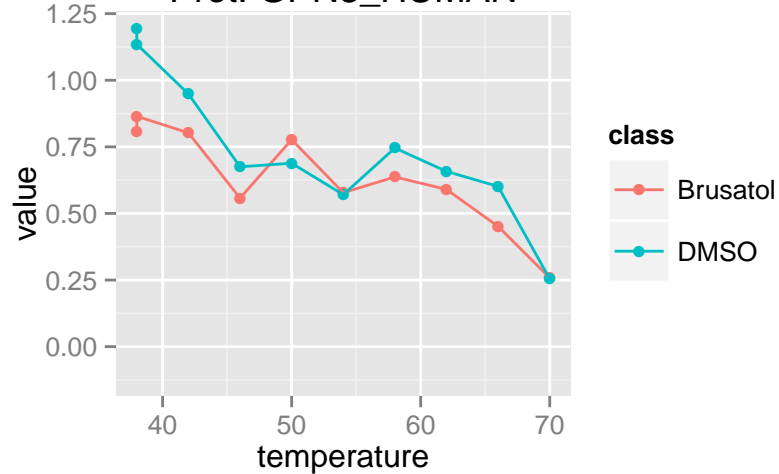

Prot: GPX1\_HUMAN

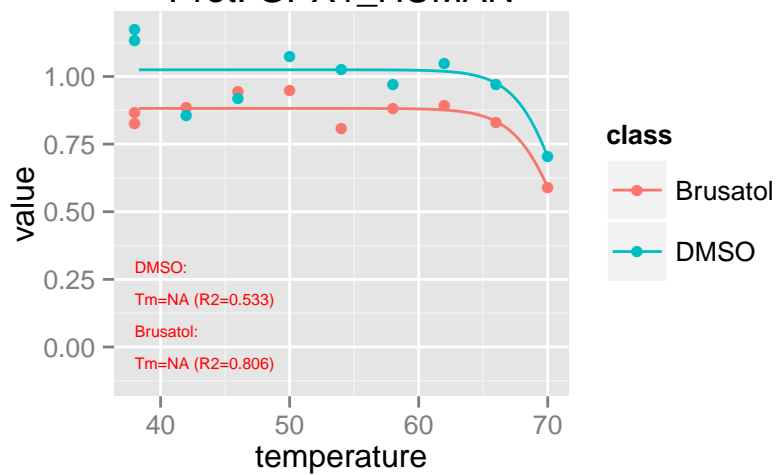

Prot: GPX2\_HUMAN

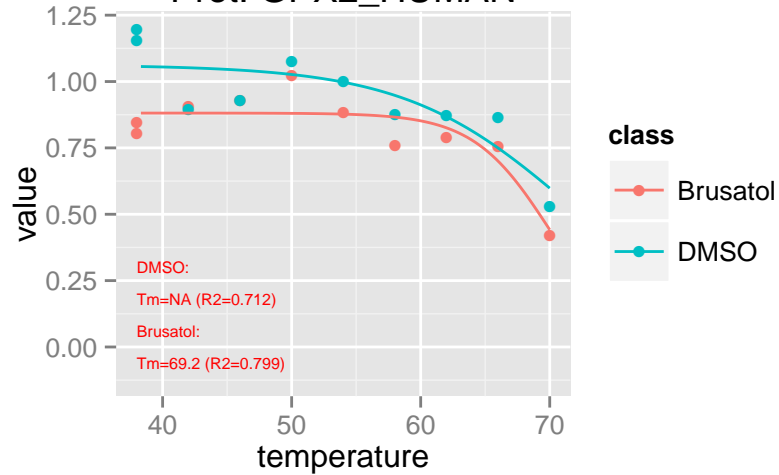

Prot: GPX4\_HUMAN

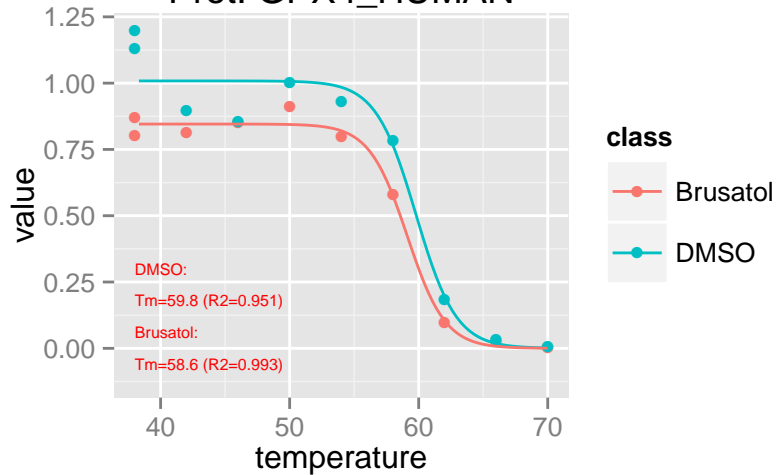

Prot: GRAN\_HUMAN

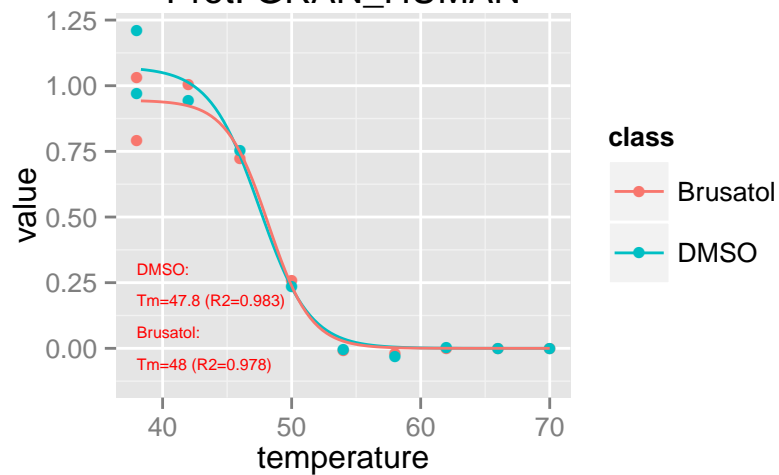

Prot: GRAP1\_HUMAN

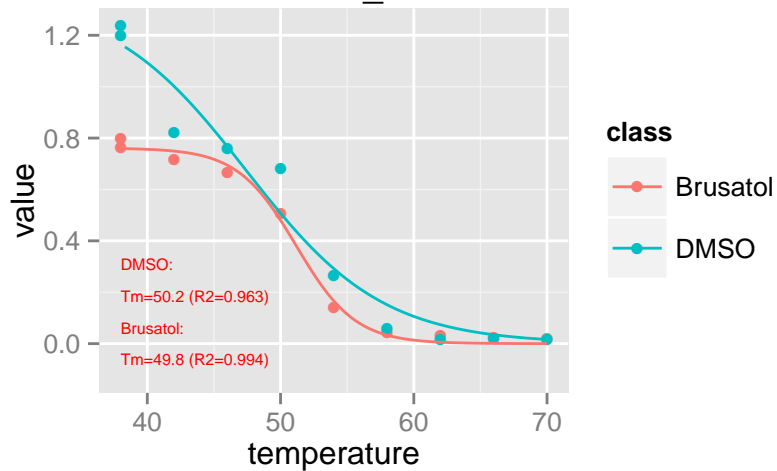

Prot: GRB10\_HUMAN

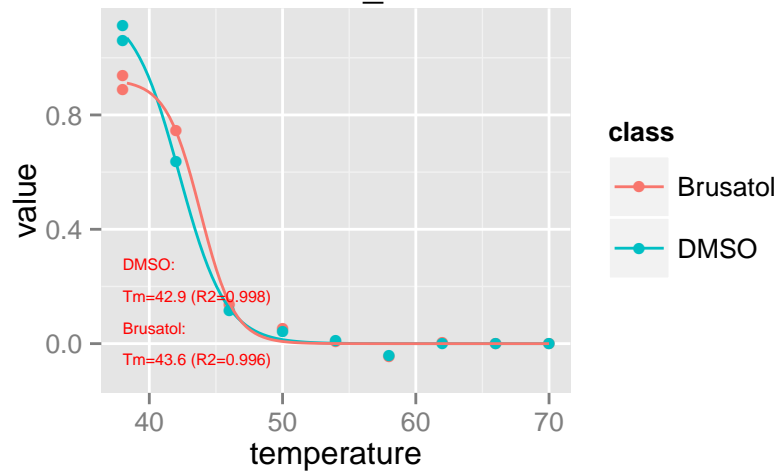

Prot: GRB2\_HUMAN

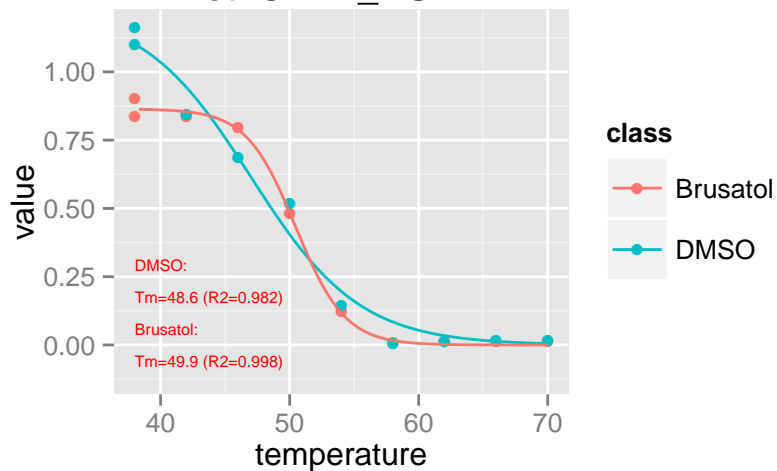

Prot: GRDN\_HUMAN

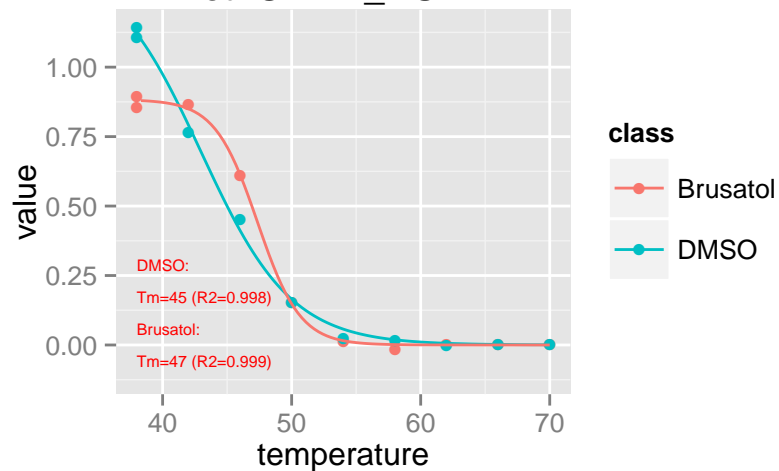

Prot: GRHPR\_HUMAN

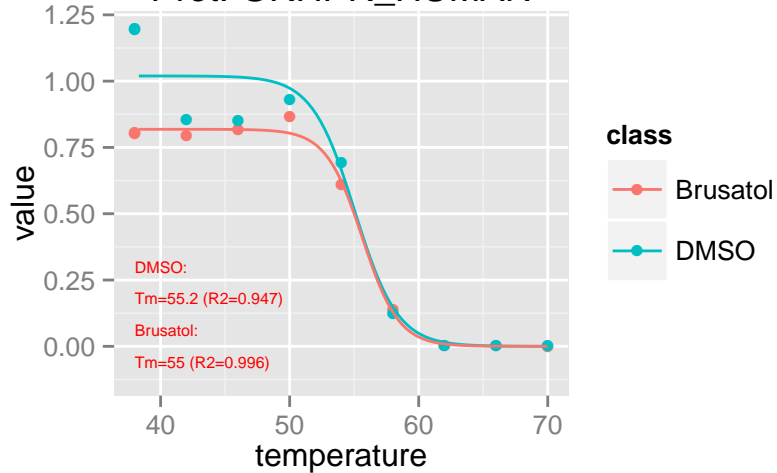

Prot: GRN\_HUMAN

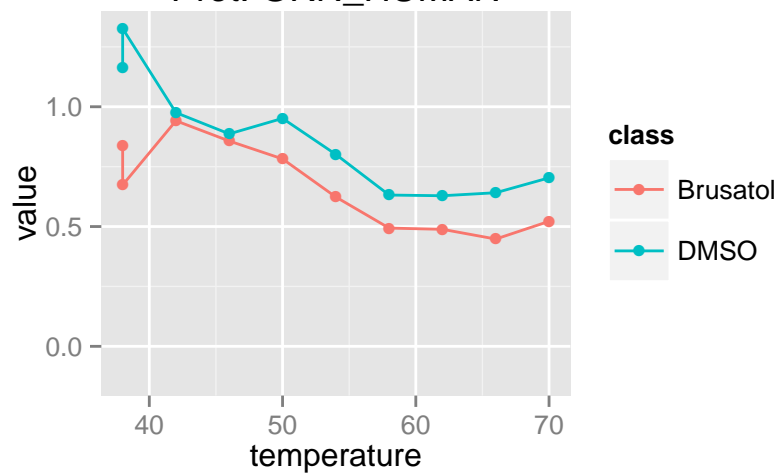

Prot: GRP75\_HUMAN

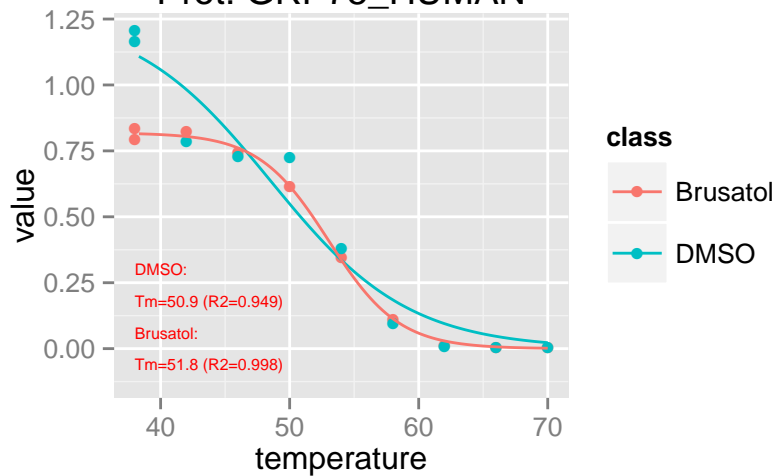

Prot: GRP78\_HUMAN

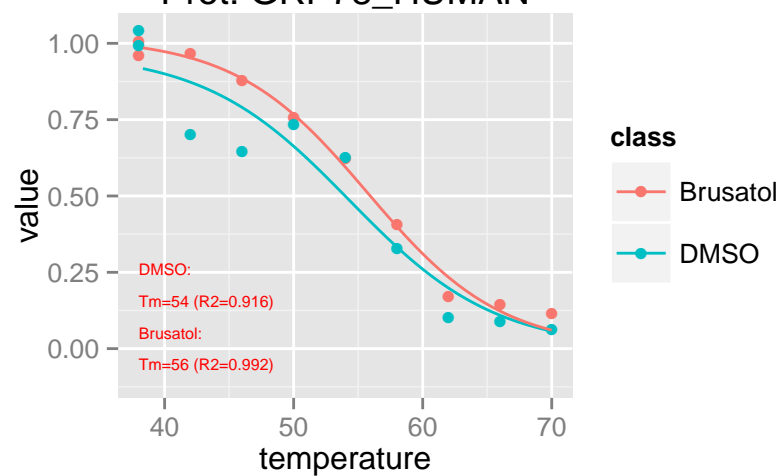

Prot: GRPE1\_HUMAN

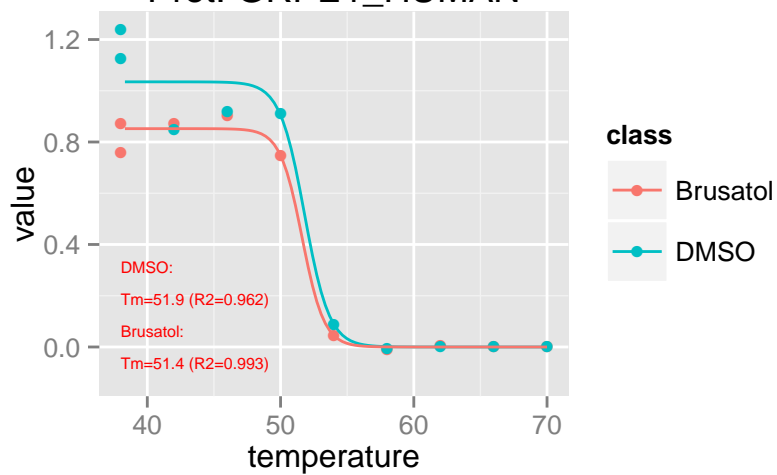

Prot: GRSF1\_HUMAN

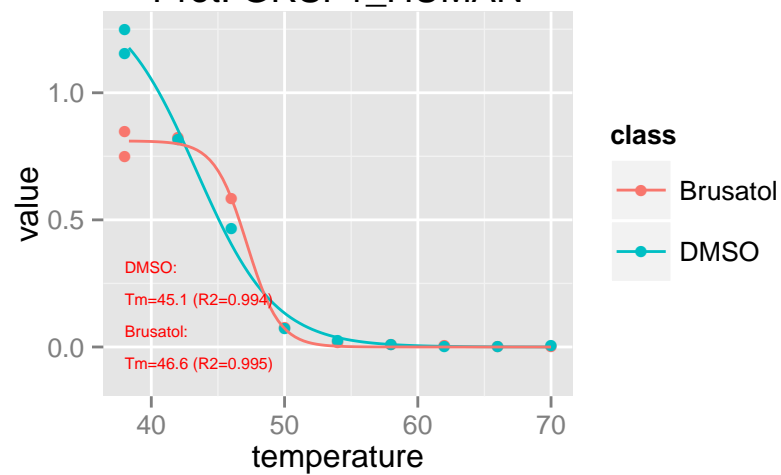

Prot: GRWD1\_HUMAN

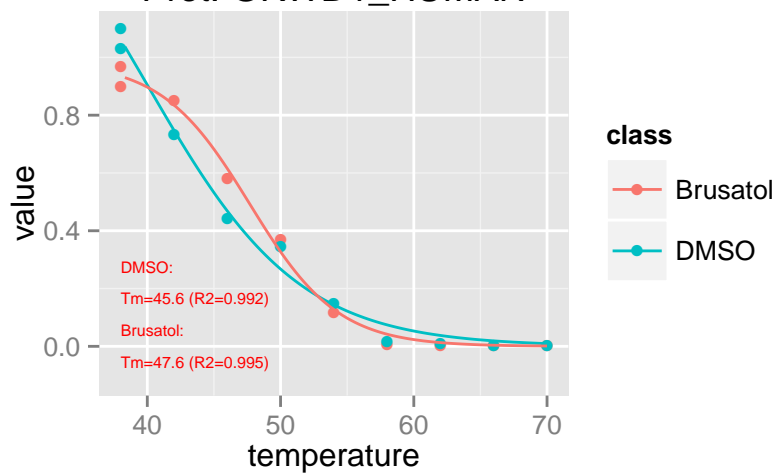

Prot: GSDMD\_HUMAN

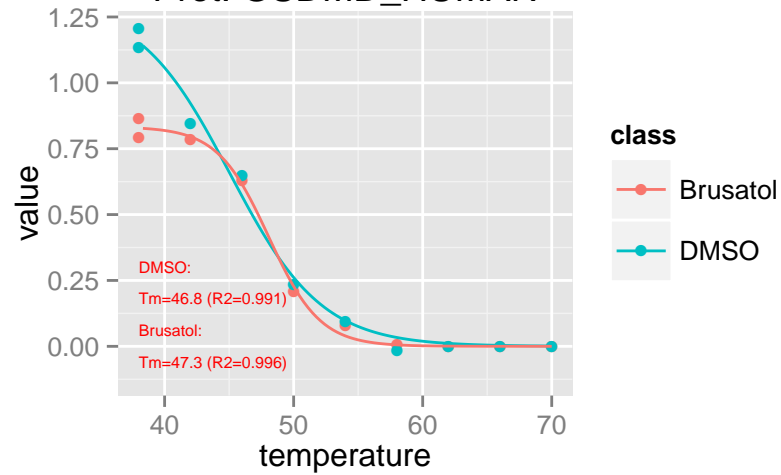

Prot: GSH0\_HUMAN

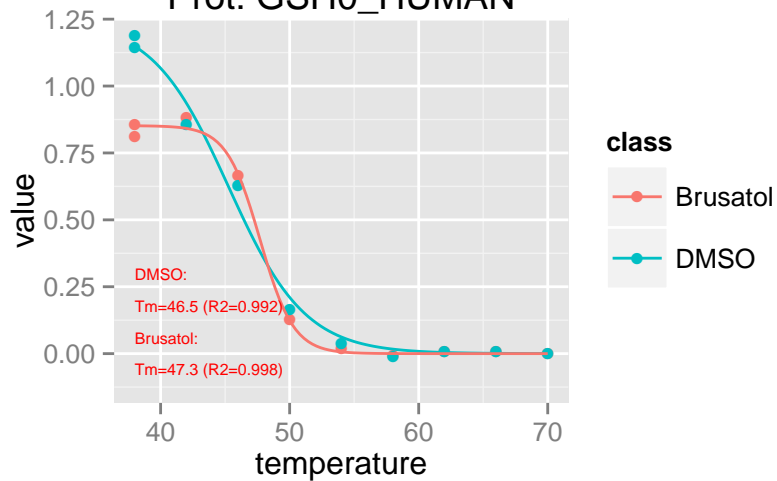

Prot: GSH1\_HUMAN

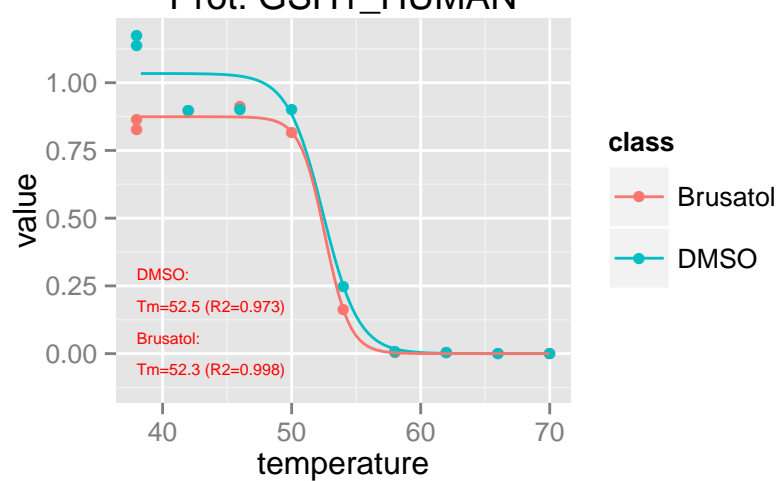

Prot: GSHB\_HUMAN

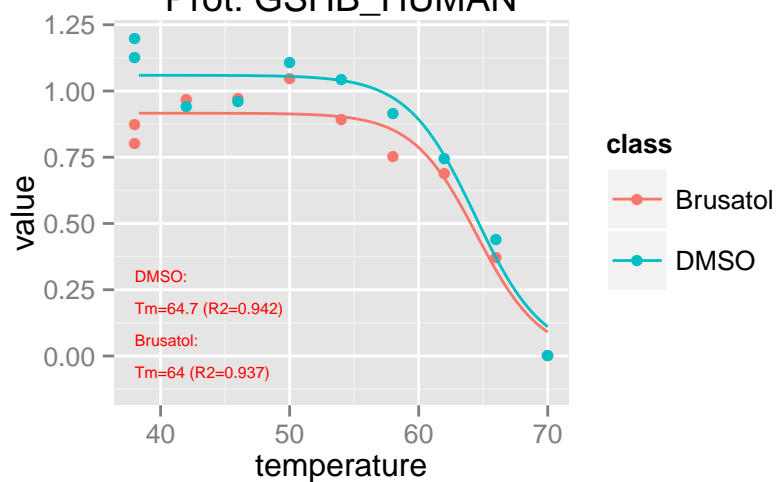

Prot: GSHR\_HUMAN

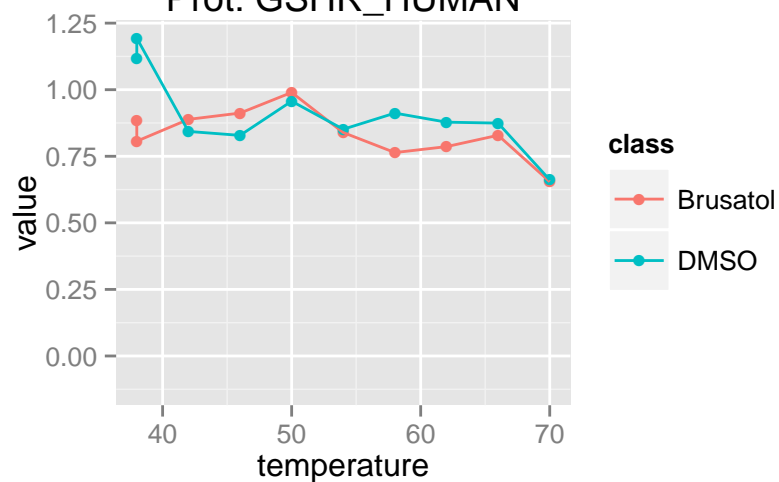

Prot: GSK3A\_HUMAN

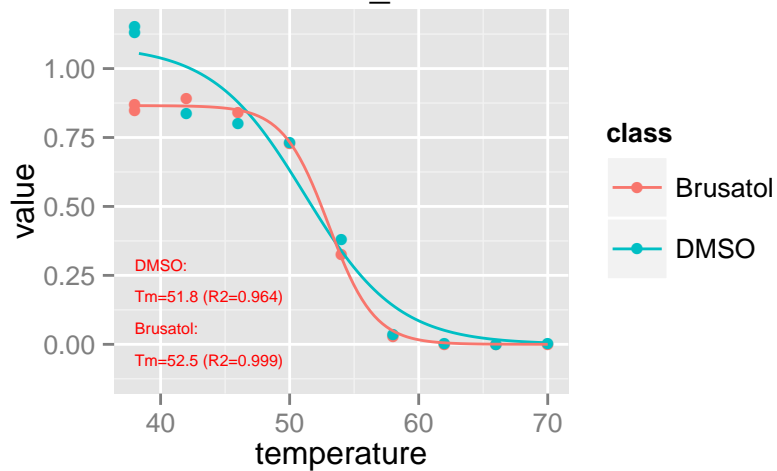

Prot: GSK3B\_HUMAN

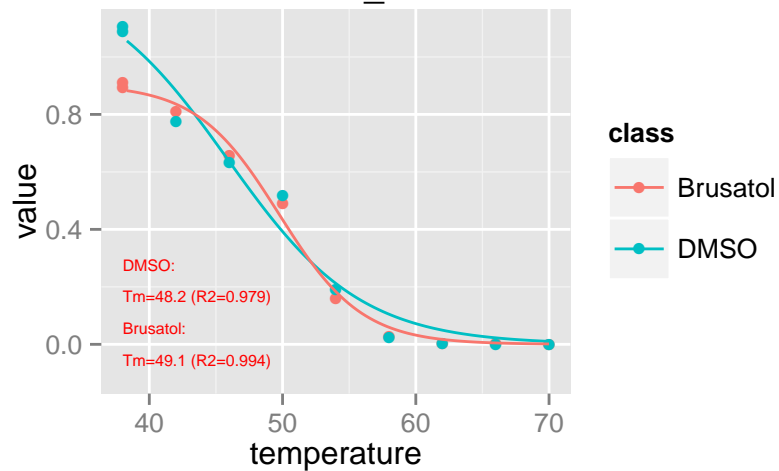

Prot: GSTCD\_HUMAN

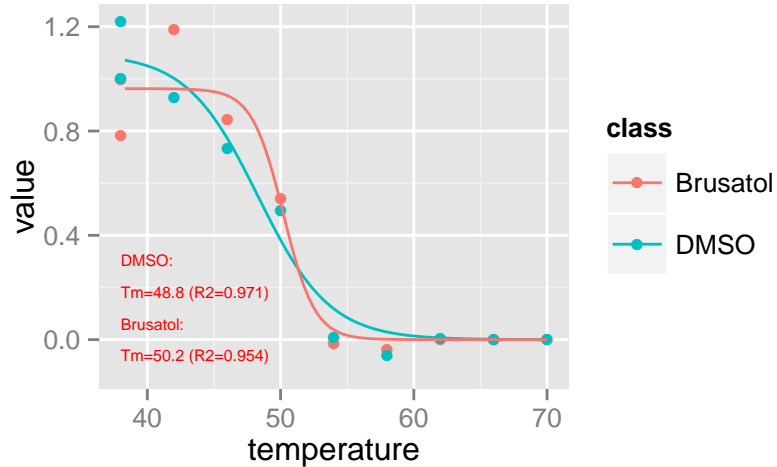

Prot: GSTK1\_HUMAN

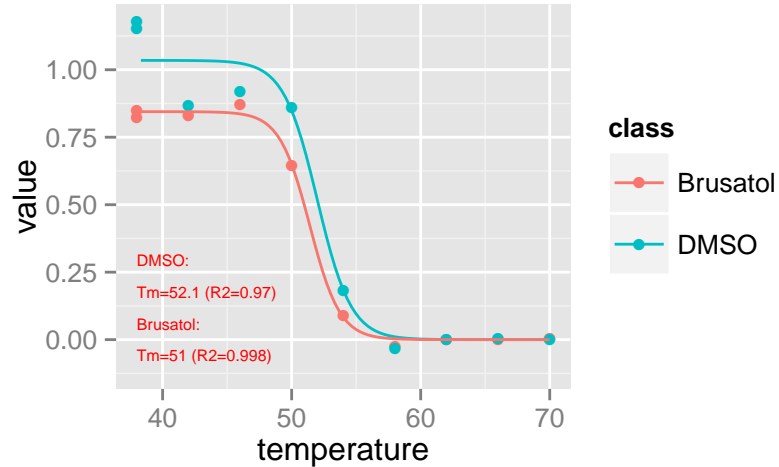

Prot: GSTM3\_HUMAN

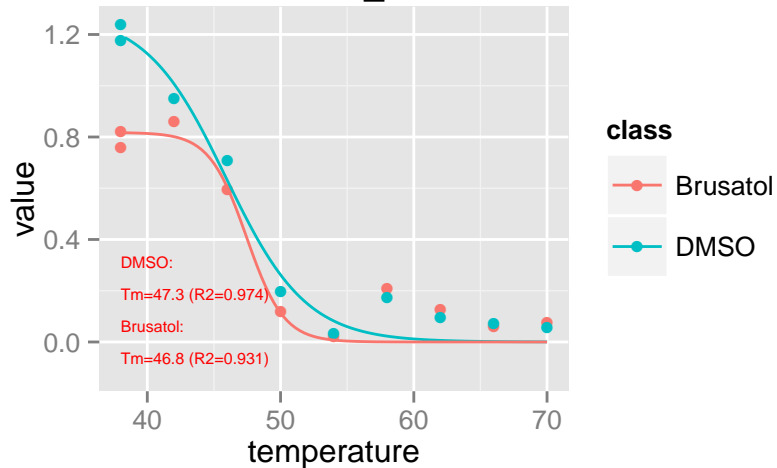

Prot: GSTO1\_HUMAN

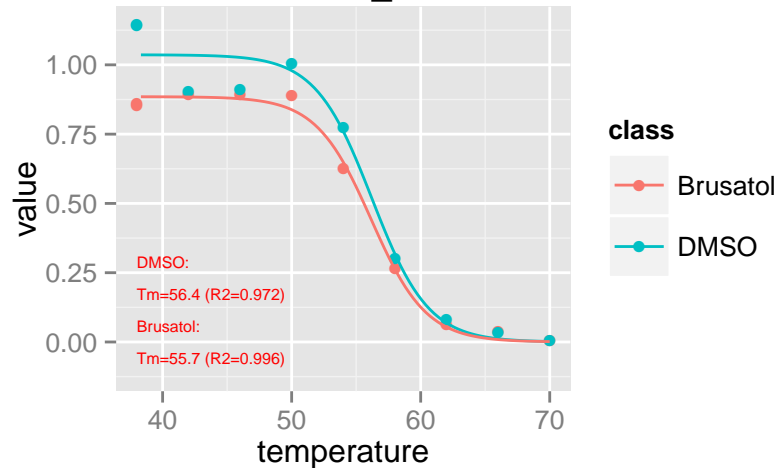

Prot: GSTP1\_HUMAN

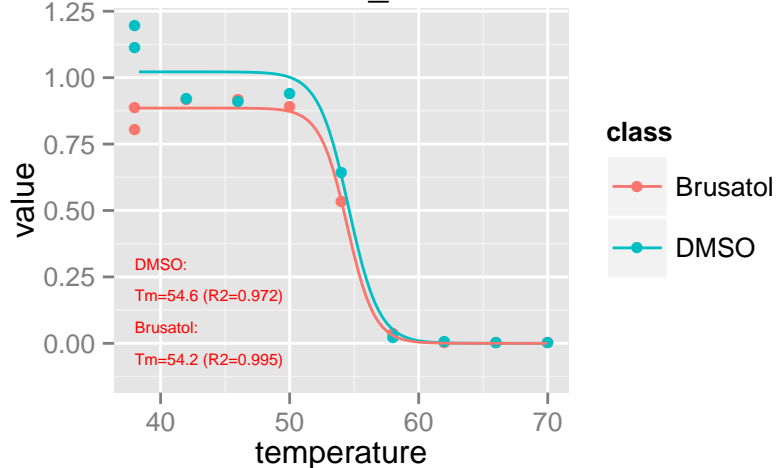

Prot: GT251\_HUMAN

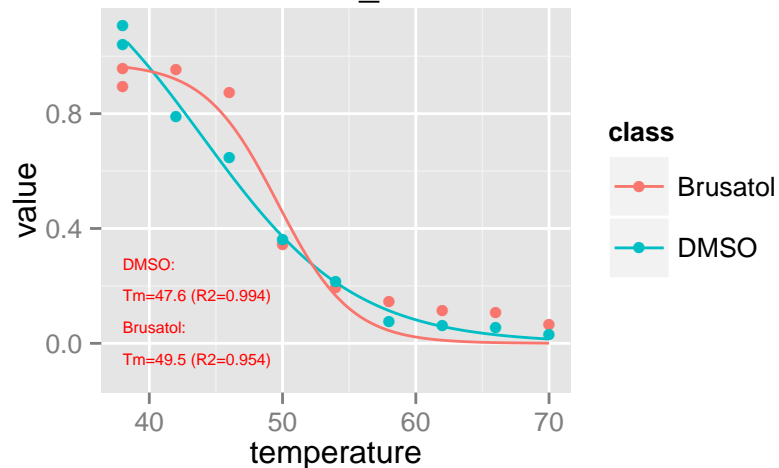

Prot: GTF2I\_HUMAN

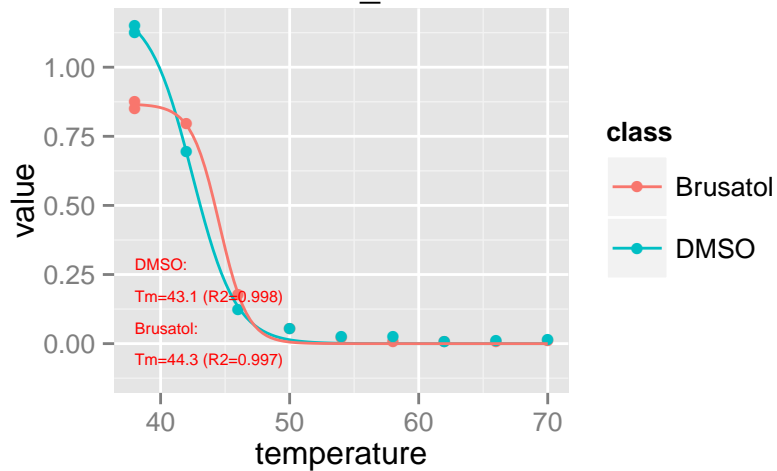

Prot: GTR1\_HUMAN

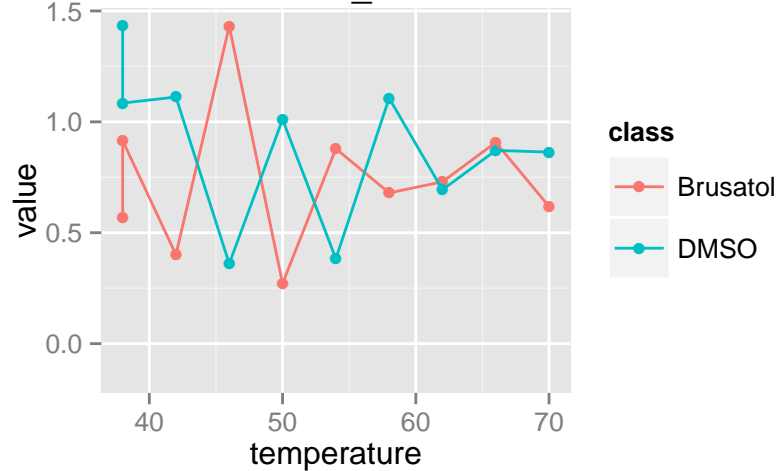

Prot: GUAA\_HUMAN

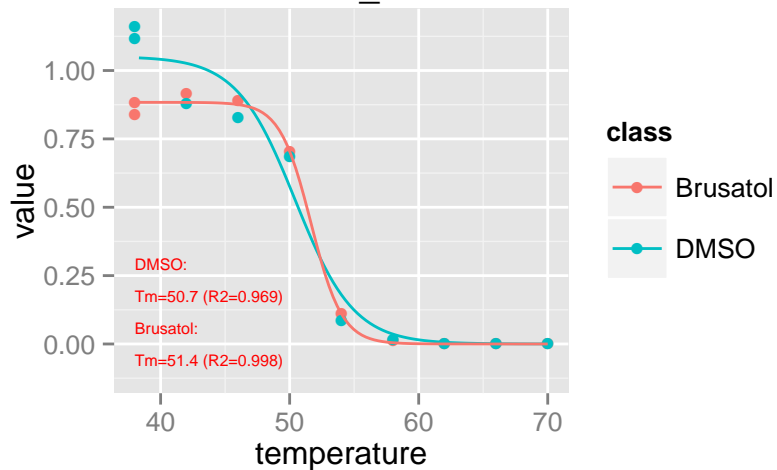

Prot: GWL\_HUMAN

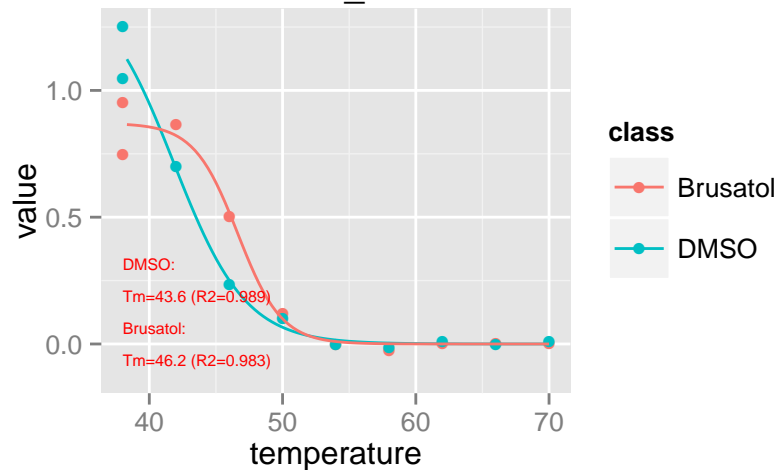

Prot: GYS1\_HUMAN

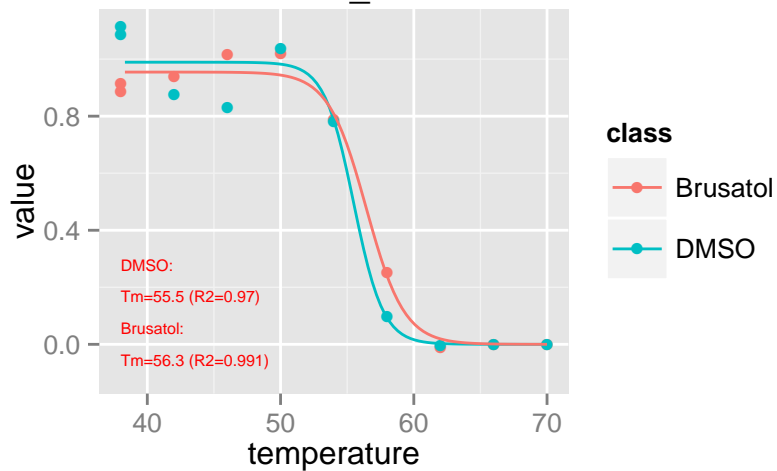

Prot: H10\_HUMAN

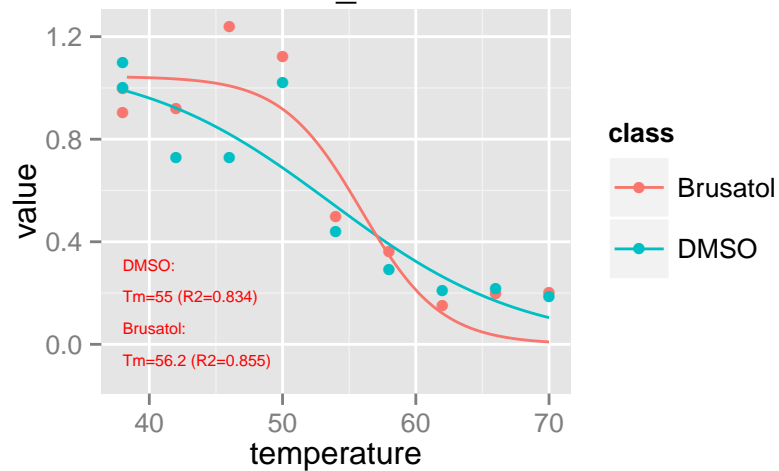



Prot: H11\_HUMAN

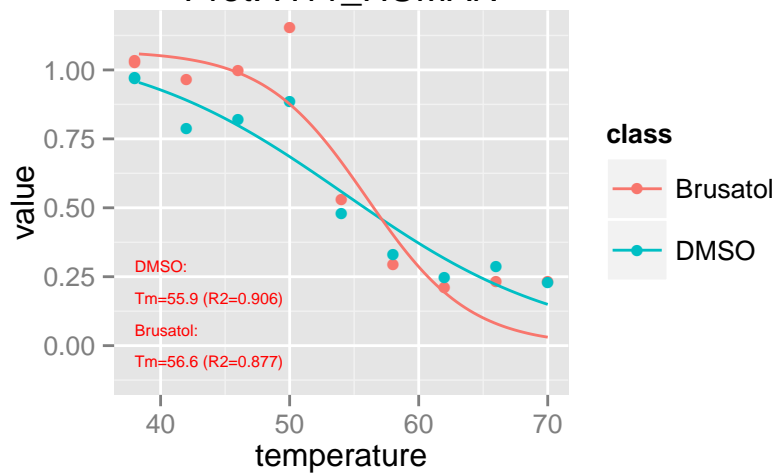

Prot: H12\_HUMAN

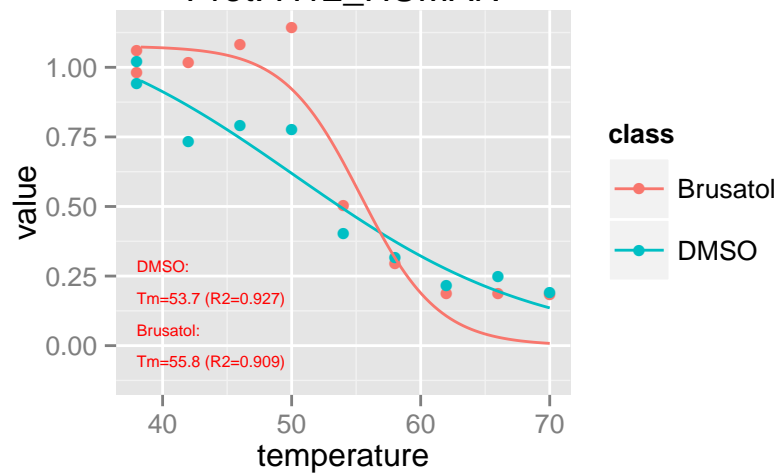

Prot: H13\_HUMAN

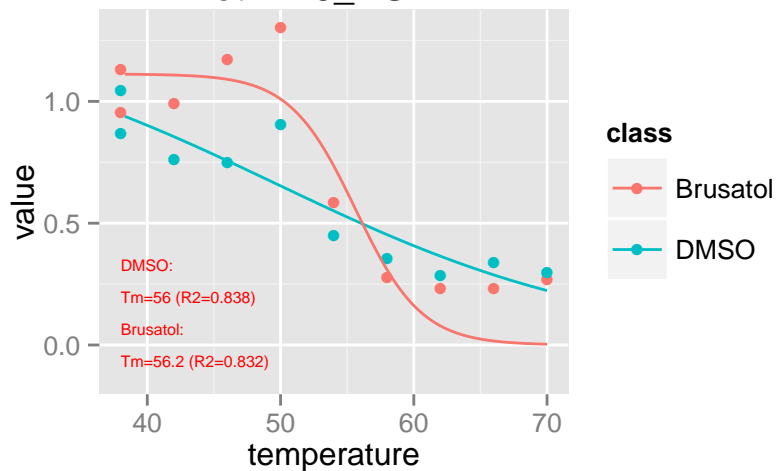

Prot: H14\_HUMAN

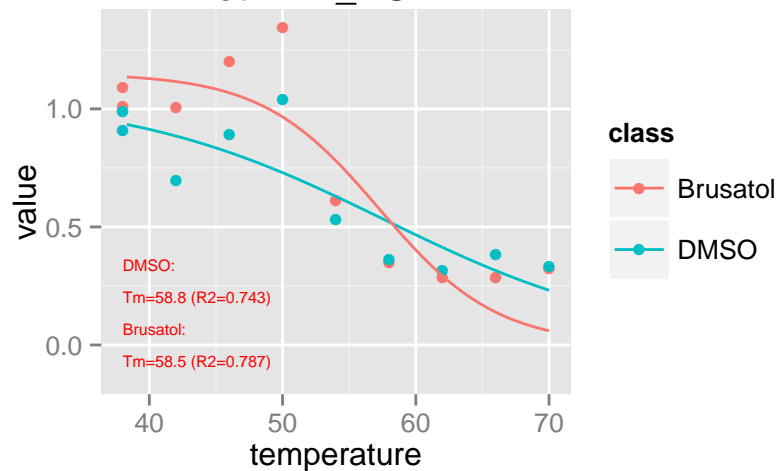

Prot: H15\_HUMAN

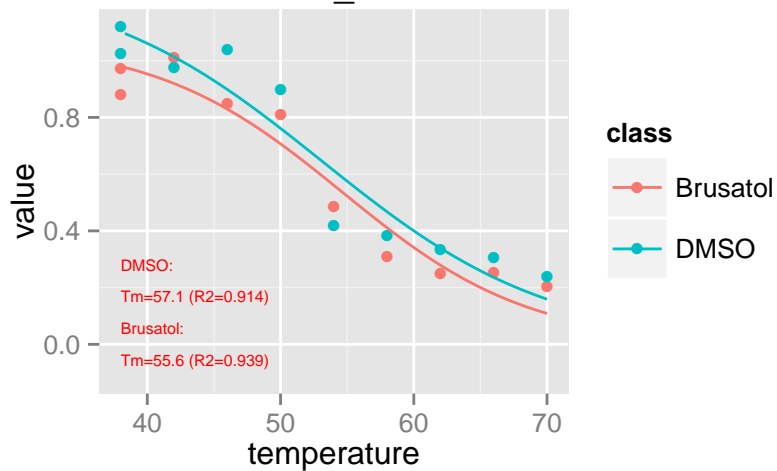

Prot: H1BP3\_HUMAN

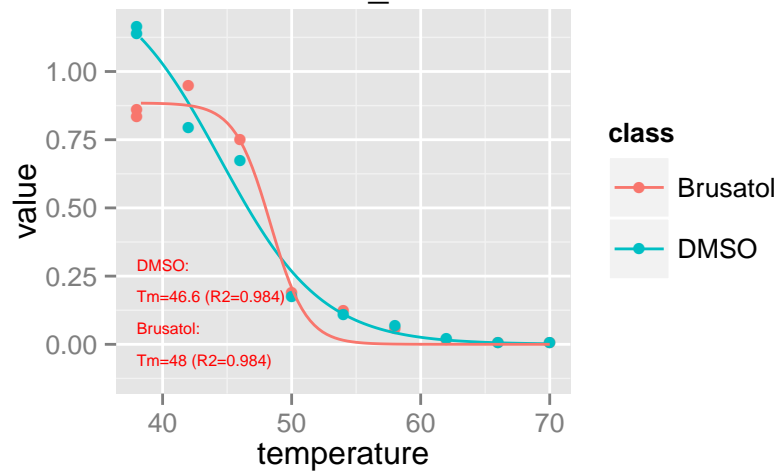

Prot: H1X\_HUMAN

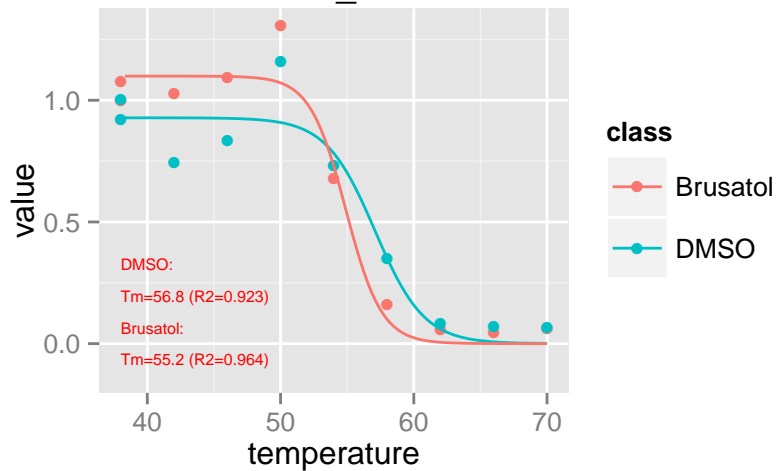

Prot: H2A1A\_HUMAN

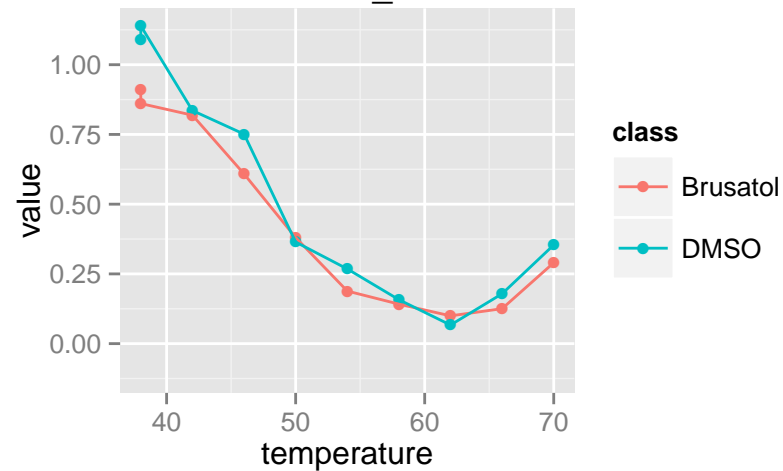

Prot: H2B1A\_HUMAN

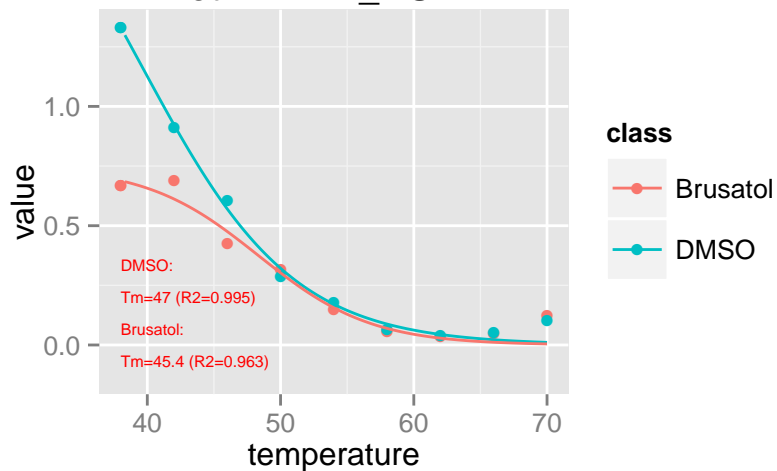

Prot: H2B1B\_HUMAN

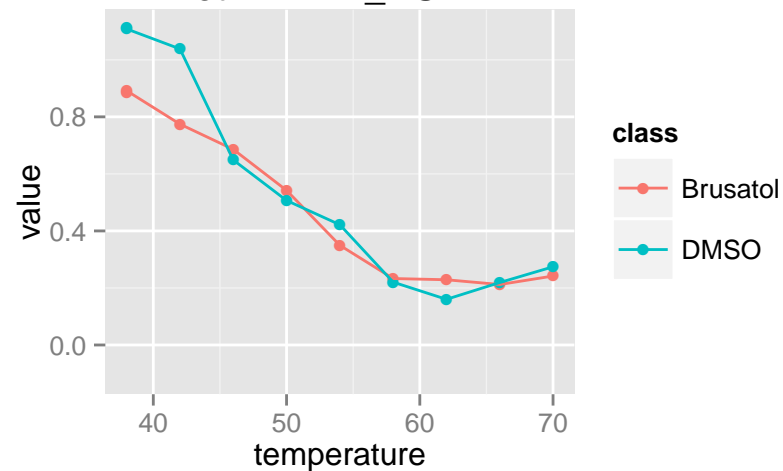

Prot: H2B1C\_HUMAN

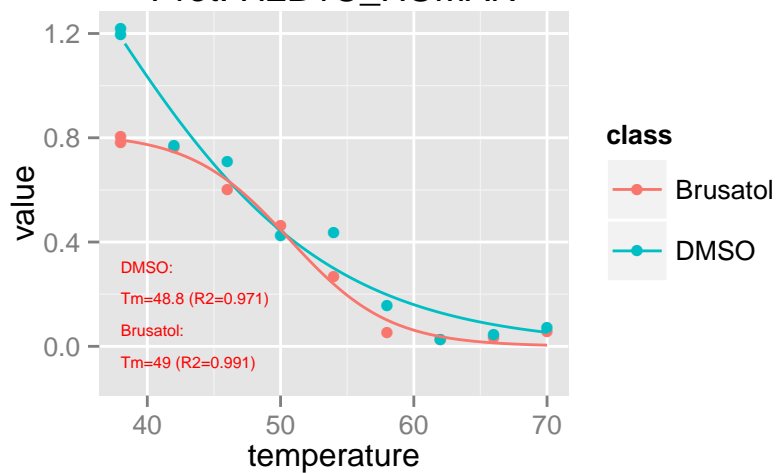

Prot: H31T\_HUMAN

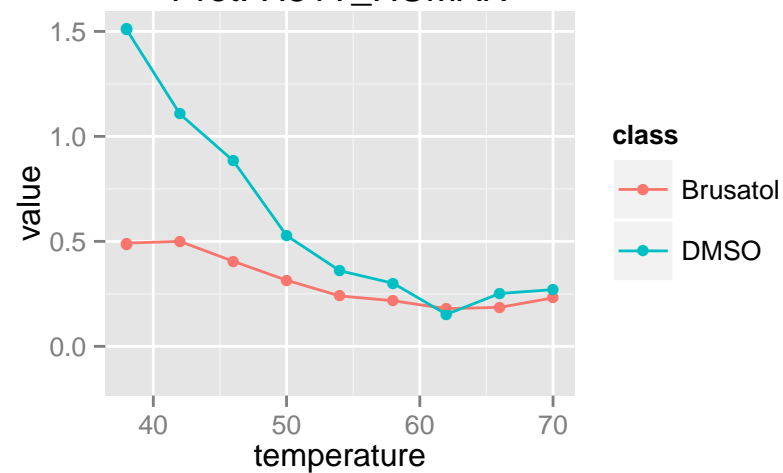

Prot: H4\_HUMAN

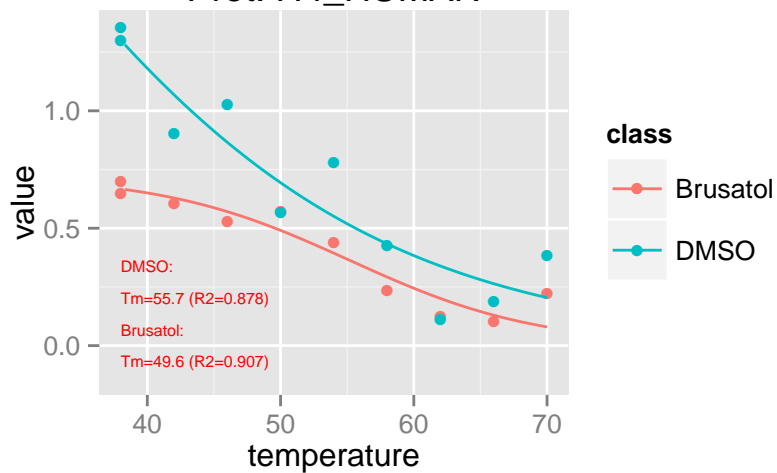

Prot: H90B2\_HUMAN

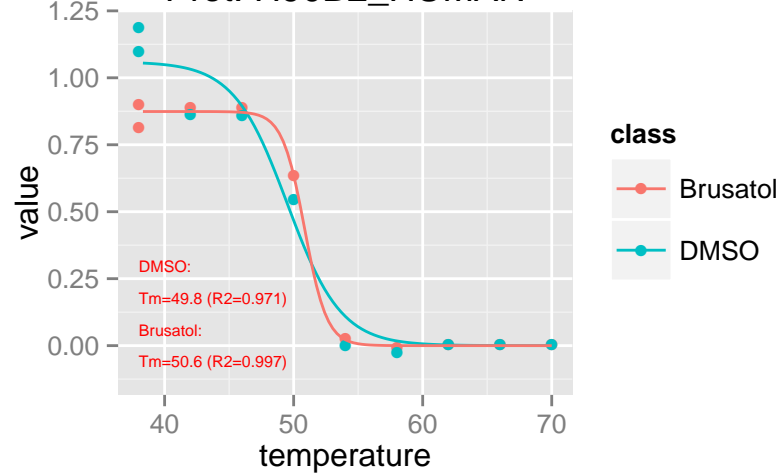

Prot: H90B3\_HUMAN

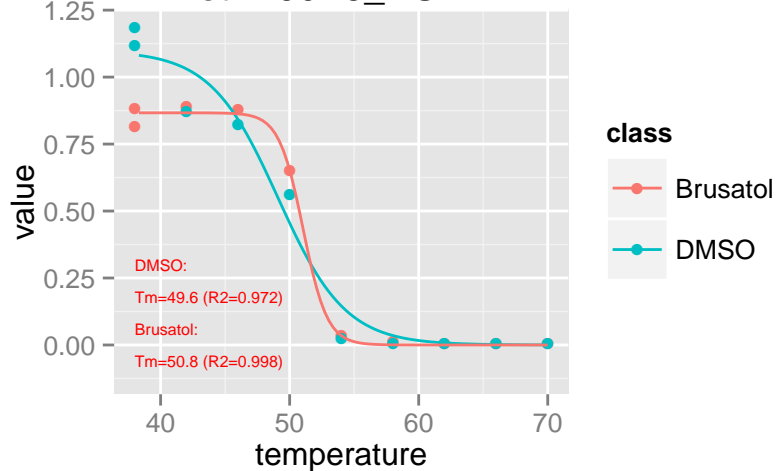

Prot: HAP28\_HUMAN

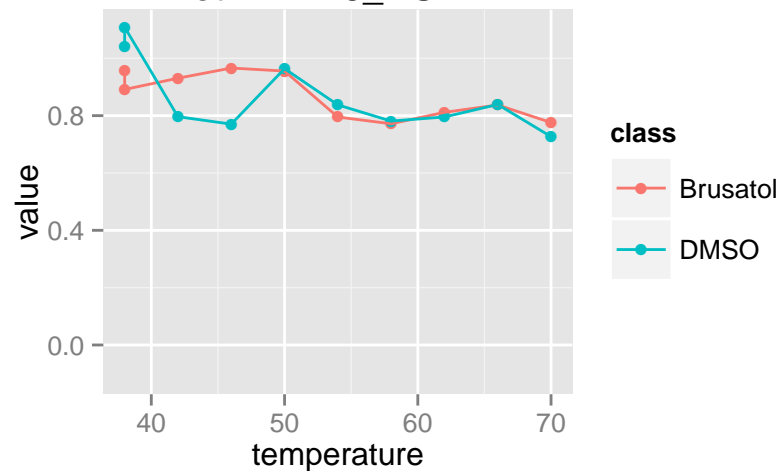

Prot: HAT1\_HUMAN

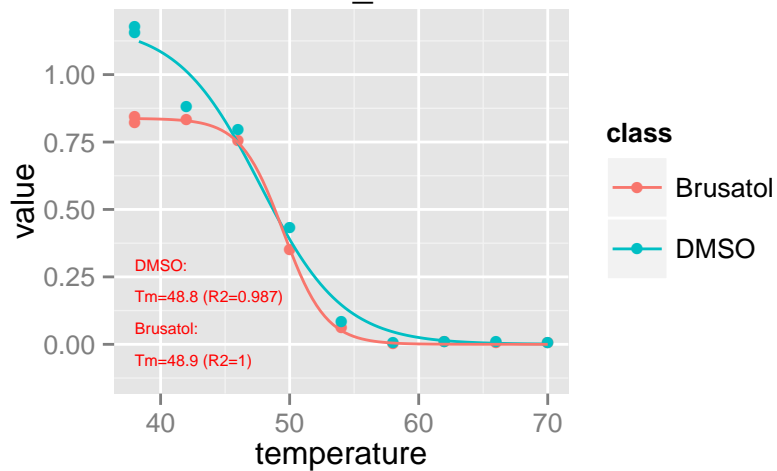

Prot: HAUS6\_HUMAN

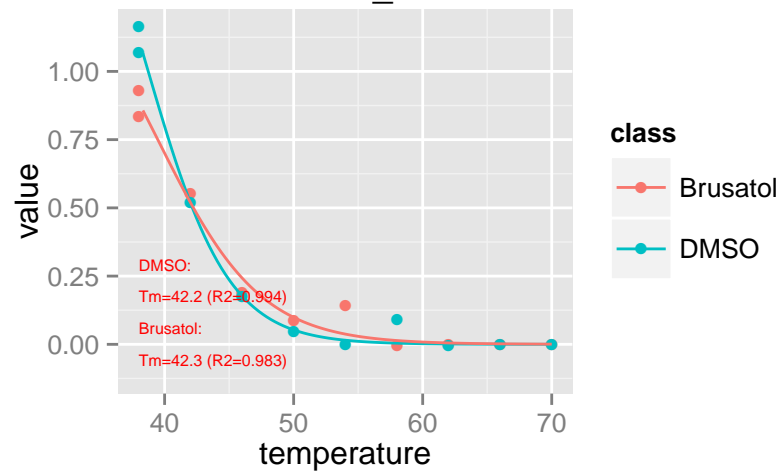

Prot: HAUS7\_HUMAN

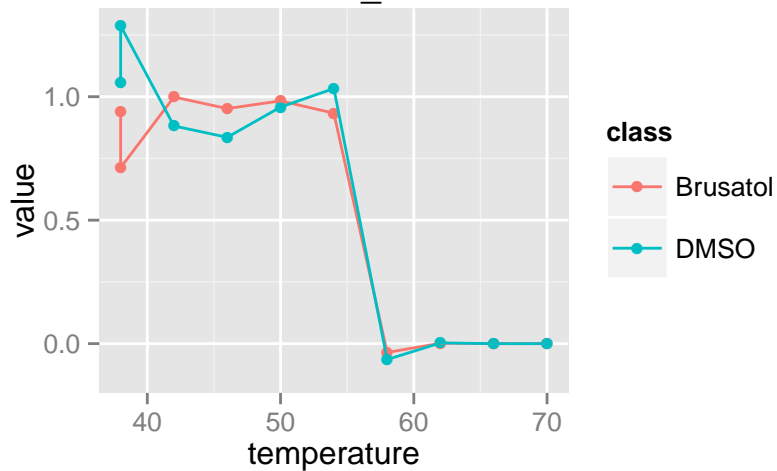

Prot: HBS1L\_HUMAN

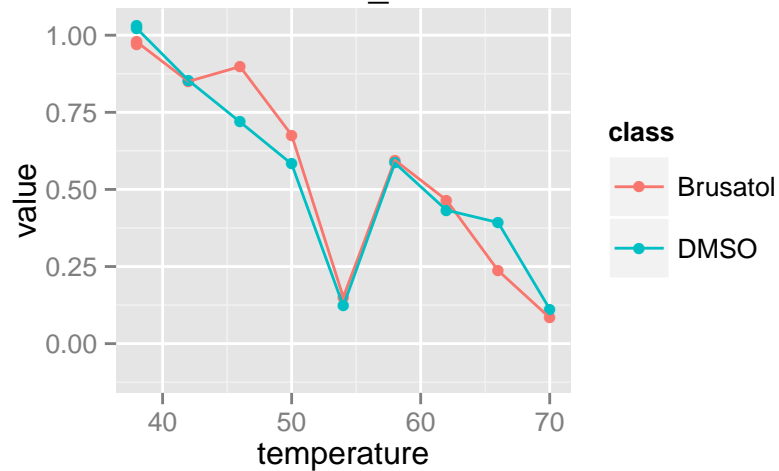

Prot: HBXIP\_HUMAN

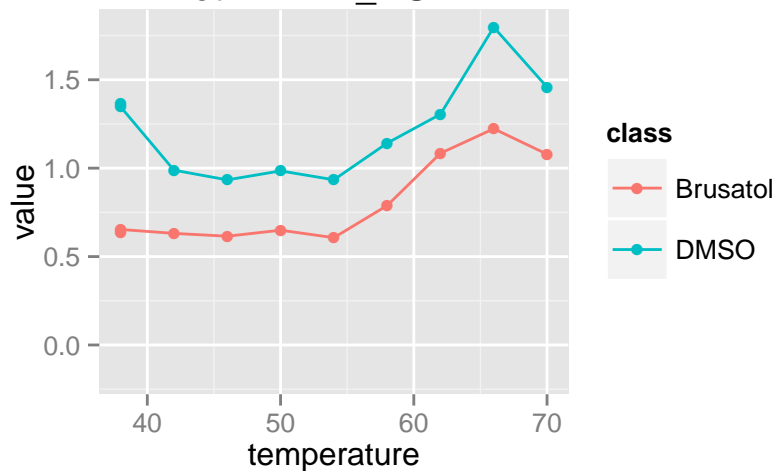

Prot: HCD2\_HUMAN

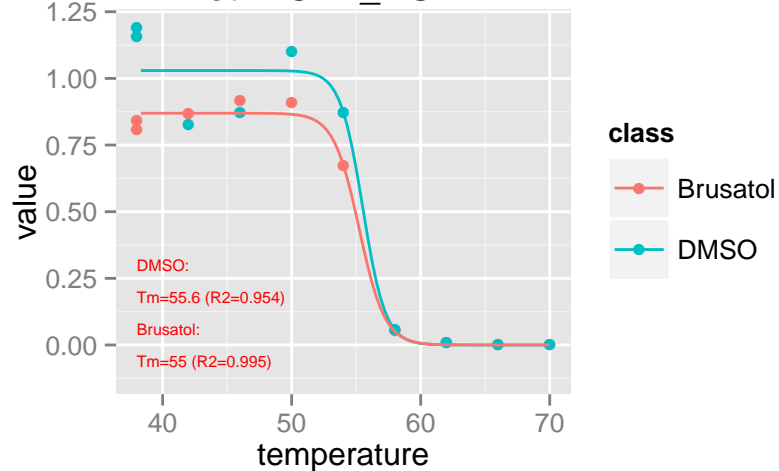

Prot: HCDH\_HUMAN

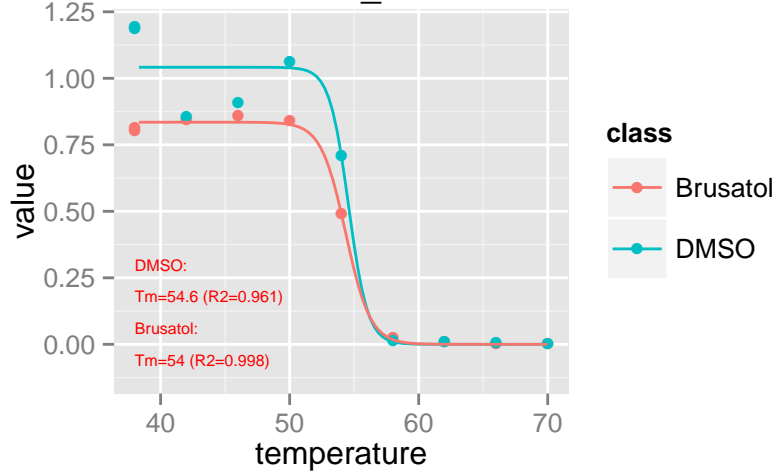

Prot: HCFC1\_HUMAN

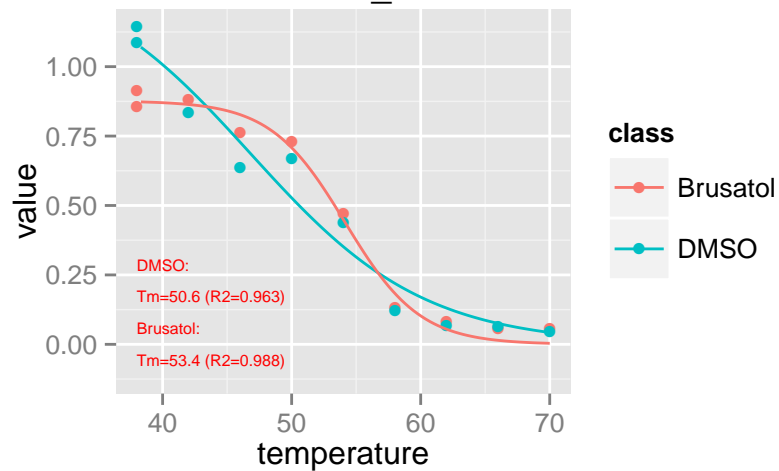

Prot: HD\_HUMAN

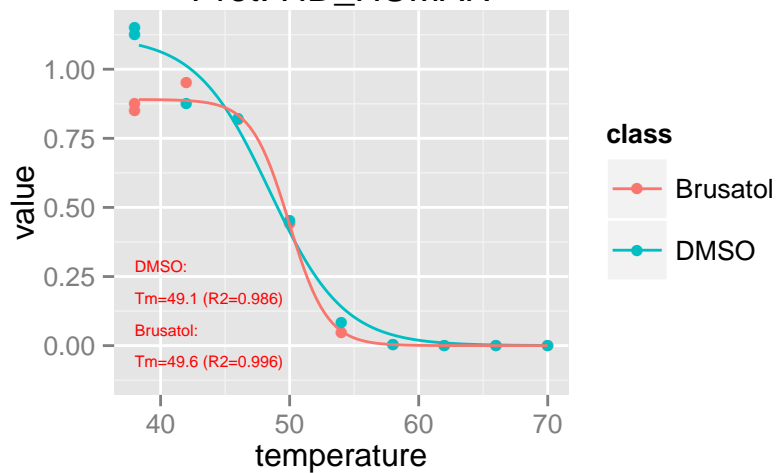

Prot: HDAC1\_HUMAN

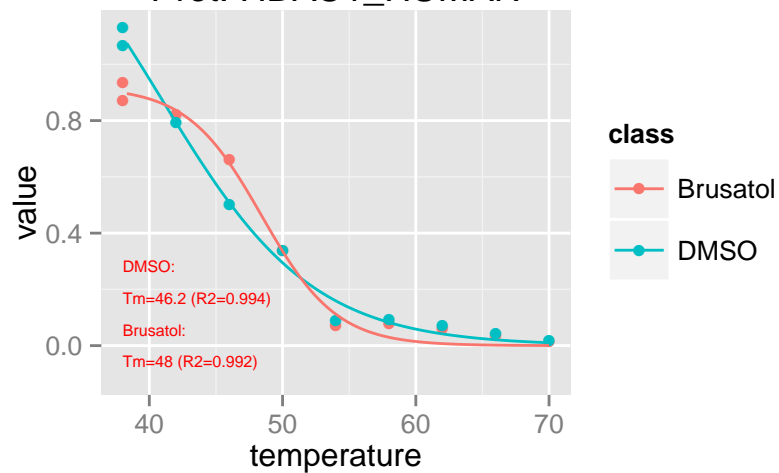

Prot: HDAC2\_HUMAN

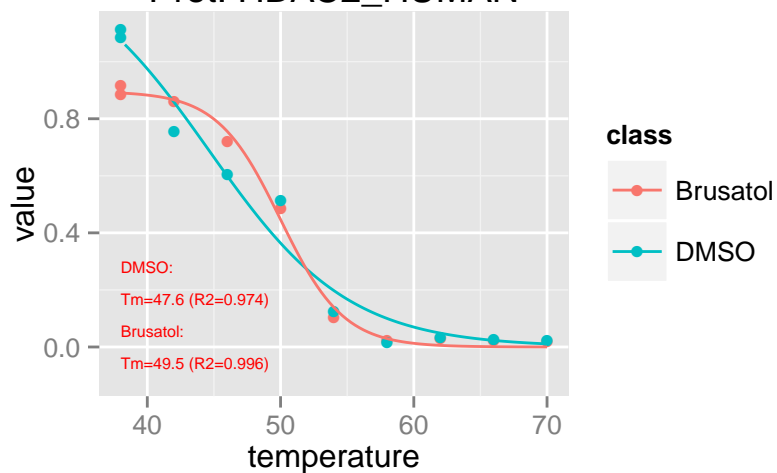

Prot: HDAC3\_HUMAN

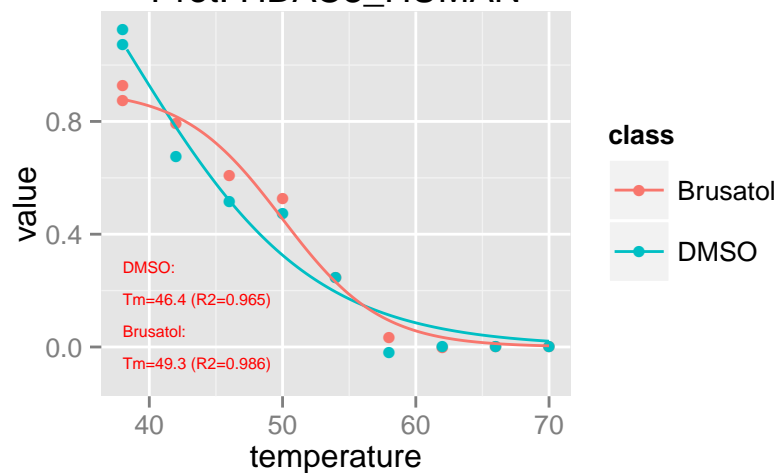

Prot: HDAC7\_HUMAN

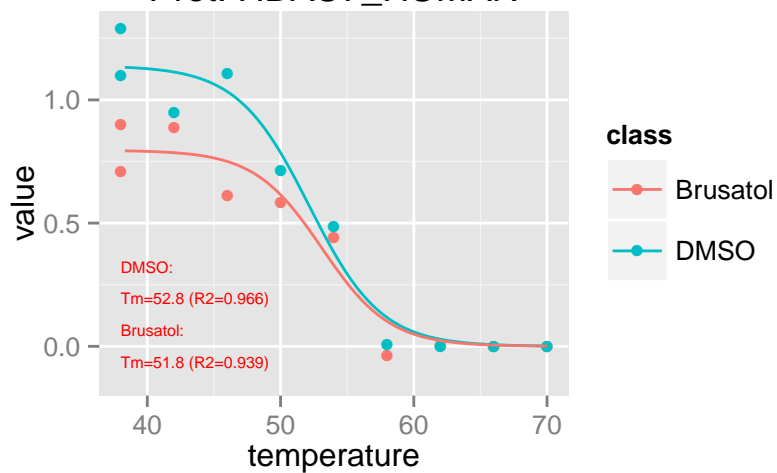

Prot: HDDC2\_HUMAN

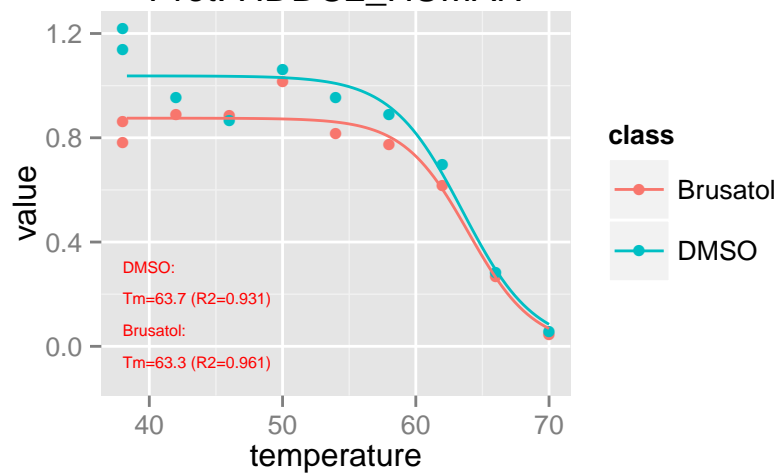

Prot: HDGF\_HUMAN

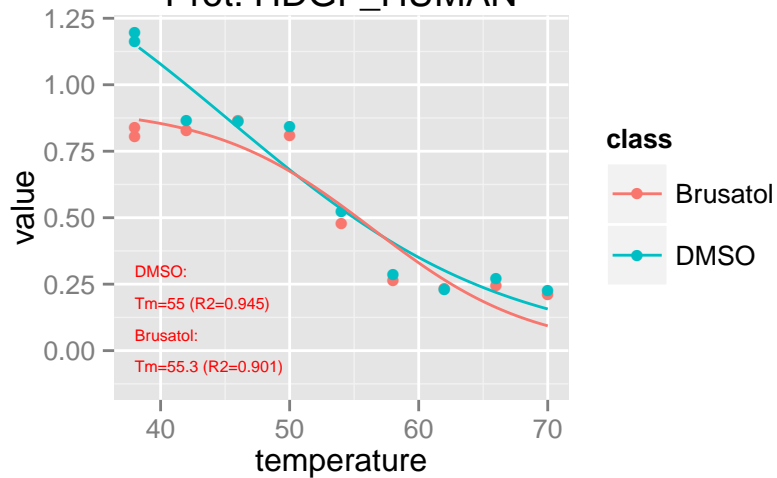

Prot: HDGR2\_HUMAN

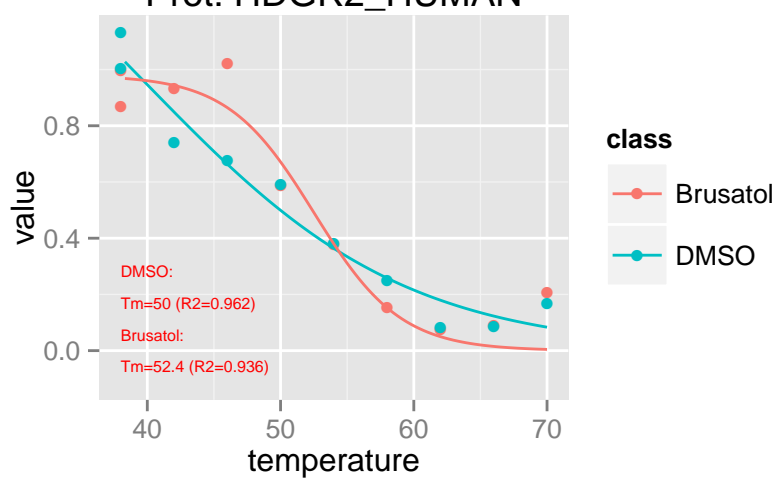

Prot: HDGR3\_HUMAN

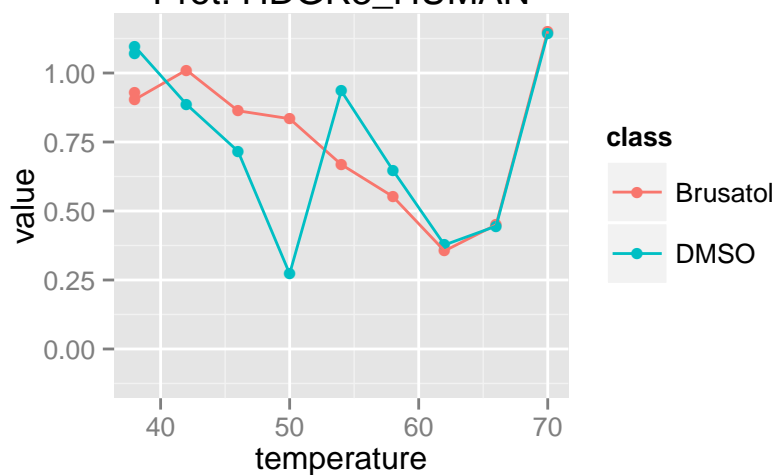

Prot: HDHD1\_HUMAN

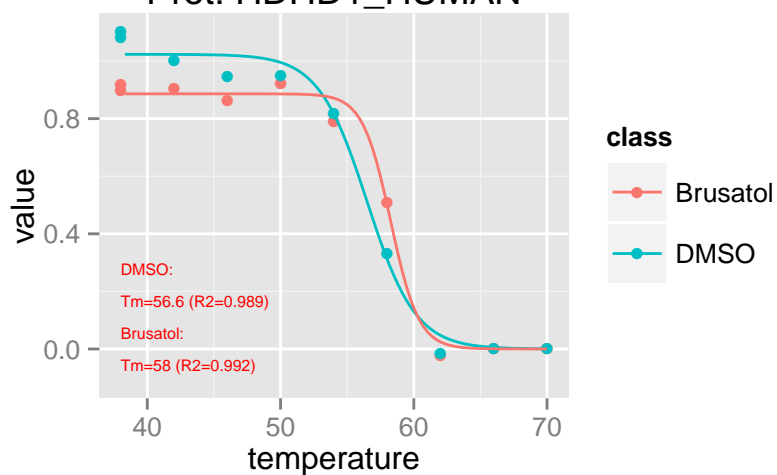

Prot: HDHD2\_HUMAN

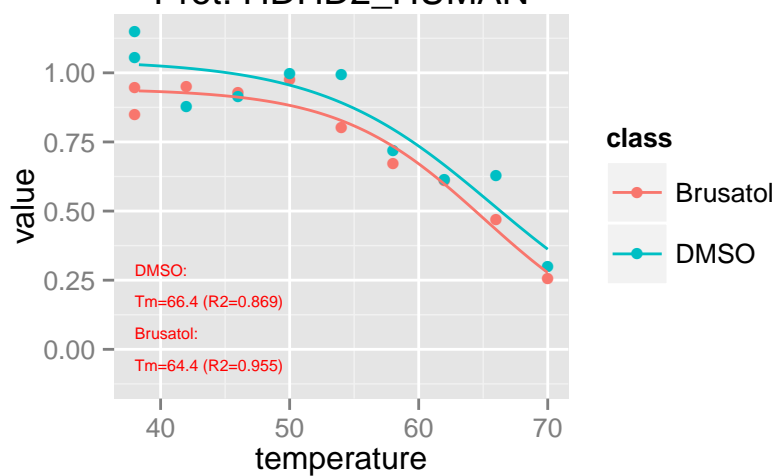

Prot: HDHD3\_HUMAN

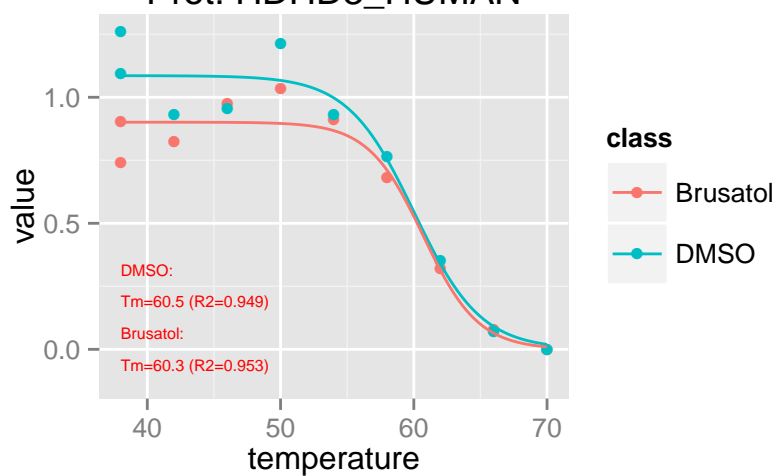

Prot: HEAT2\_HUMAN

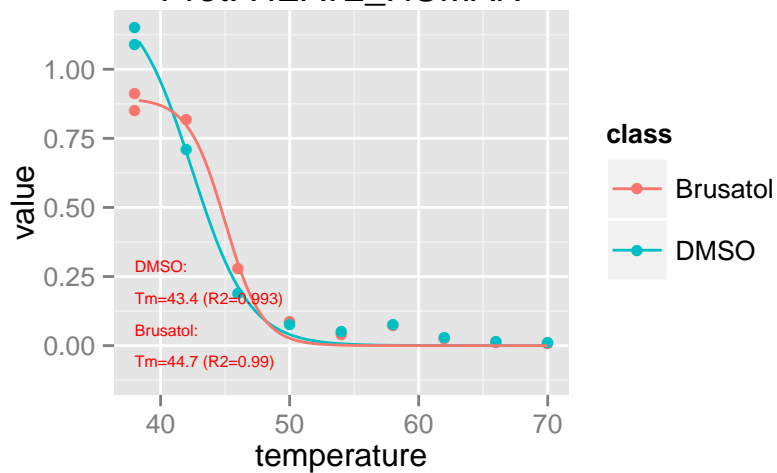

Prot: HEAT3\_HUMAN

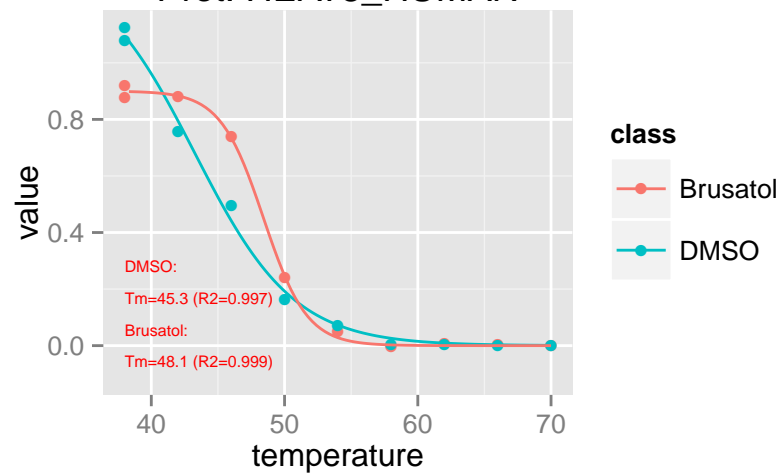

Prot: HEAT6\_HUMAN

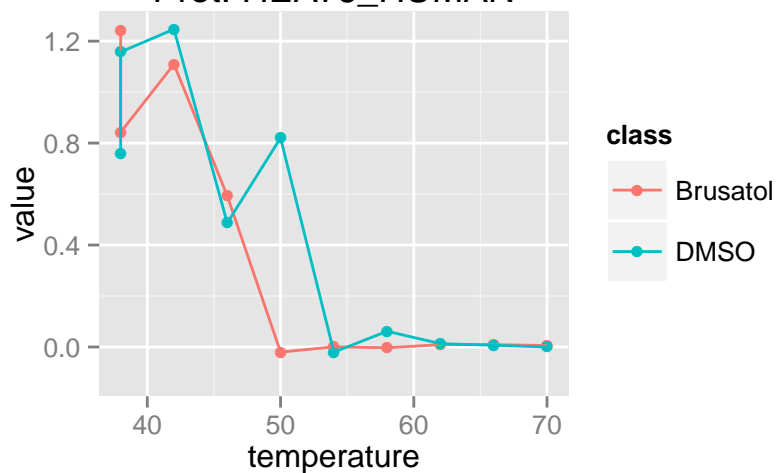

Prot: HEBP1\_HUMAN

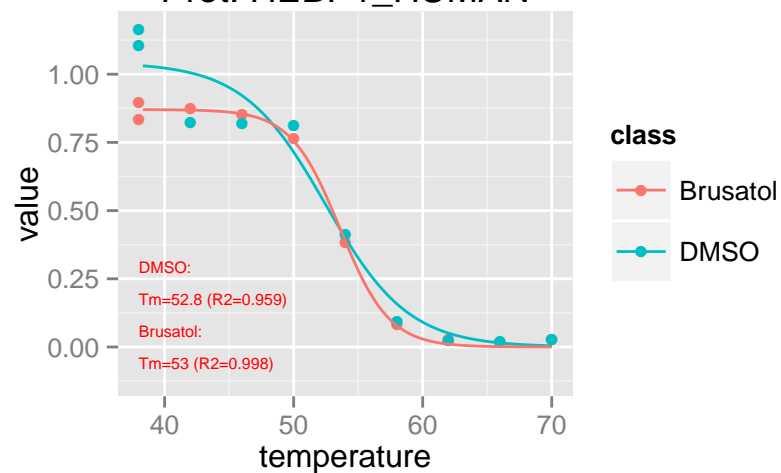

Prot: HEBP2\_HUMAN

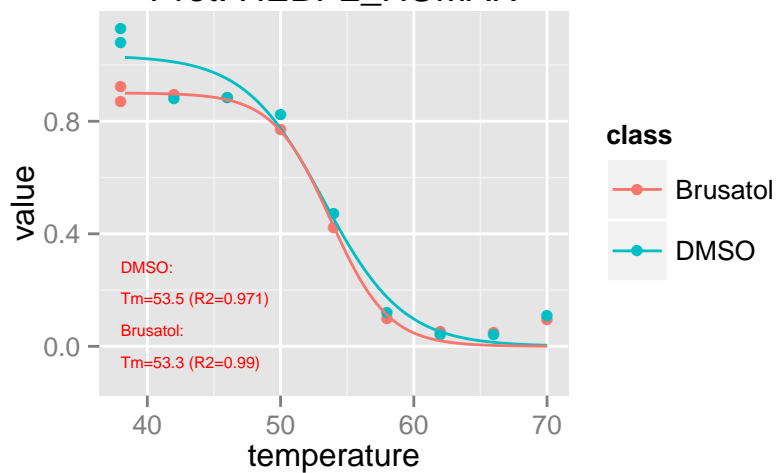

Prot: HECD1\_HUMAN

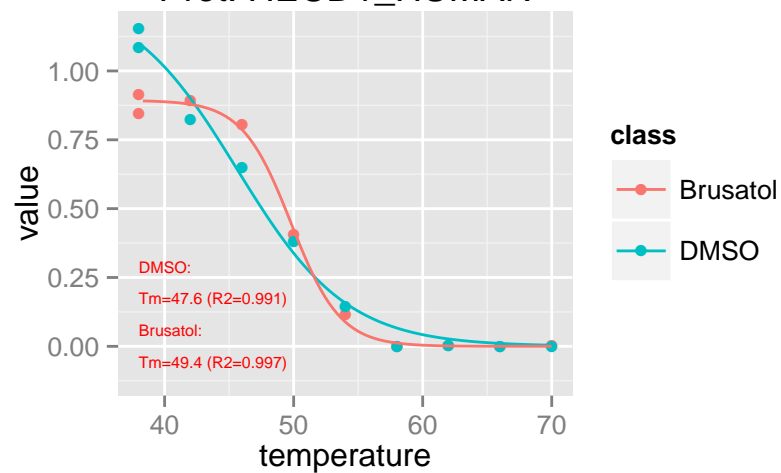

Prot: HECD3\_HUMAN

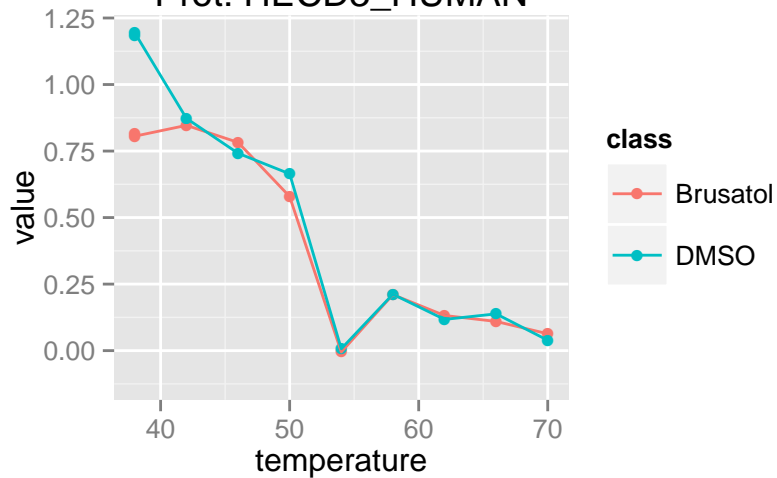

Prot: HEM2\_HUMAN

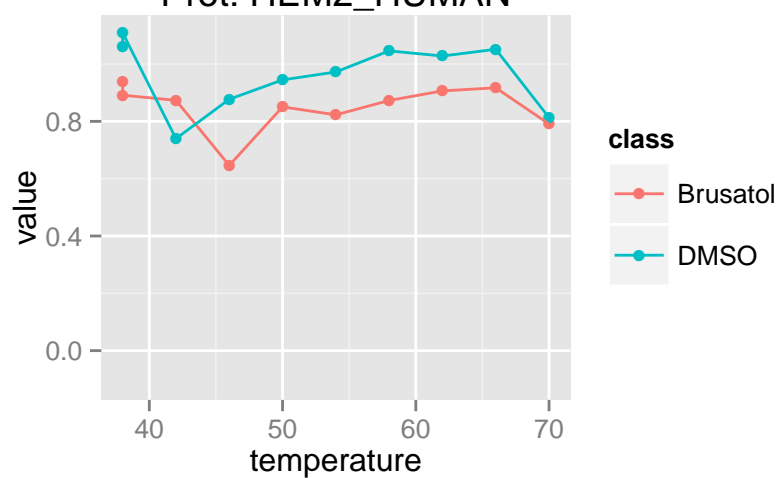

Prot: HEM3\_HUMAN

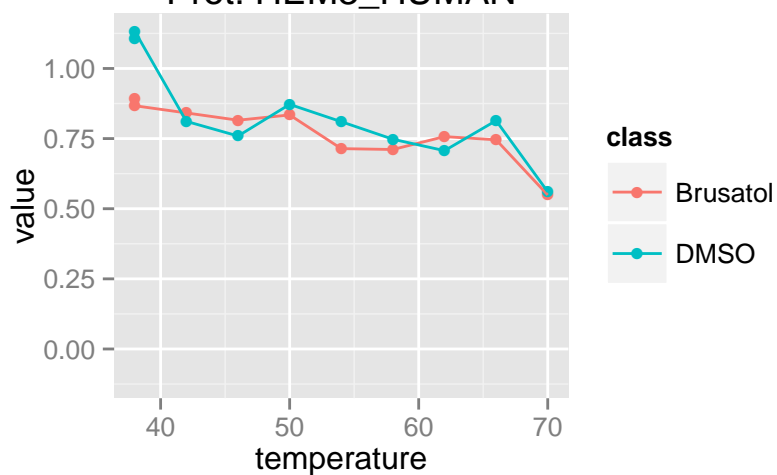

Prot: HEM4\_HUMAN

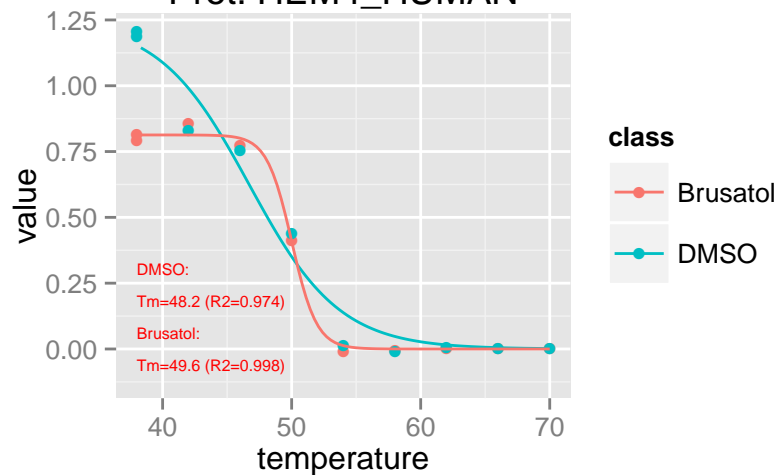

Prot: HEM6\_HUMAN

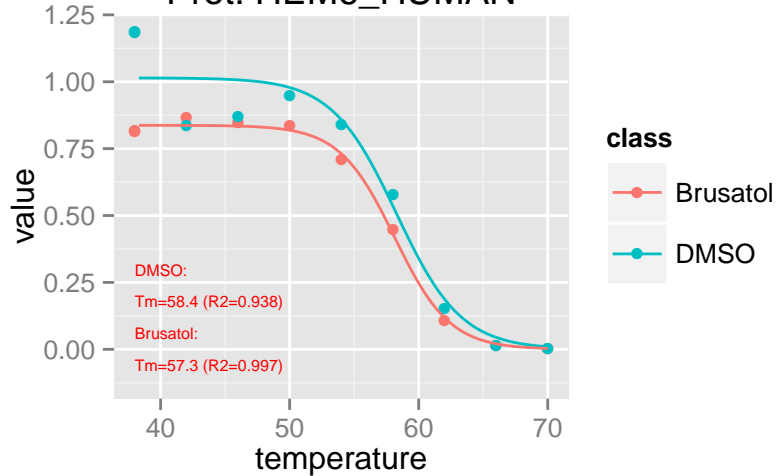

Prot: HEMH\_HUMAN

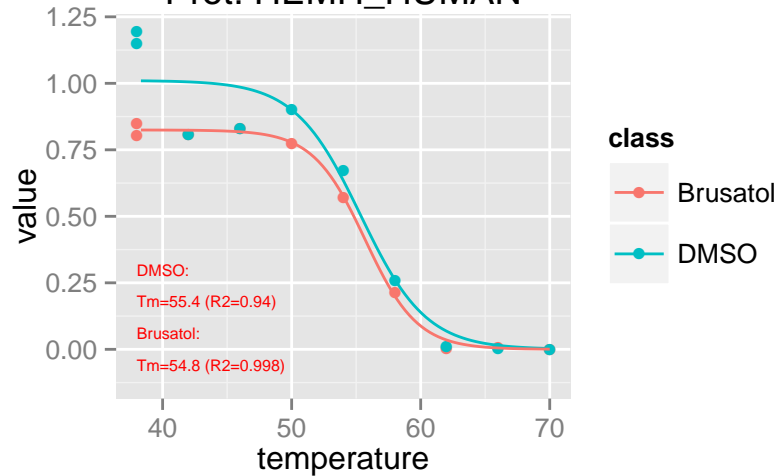



Prot: HERC1\_HUMAN

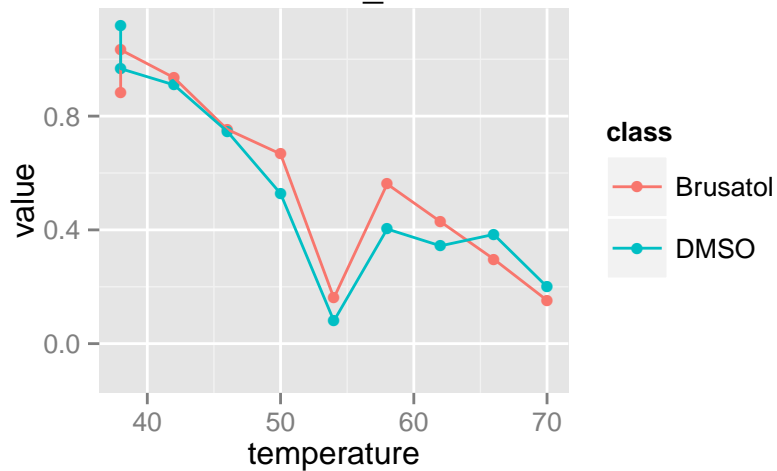

Prot: HERC4\_HUMAN

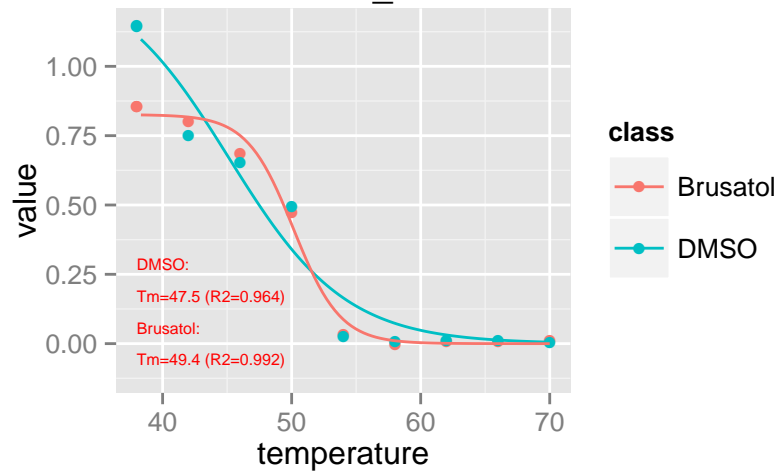

Prot: HEXA\_HUMAN

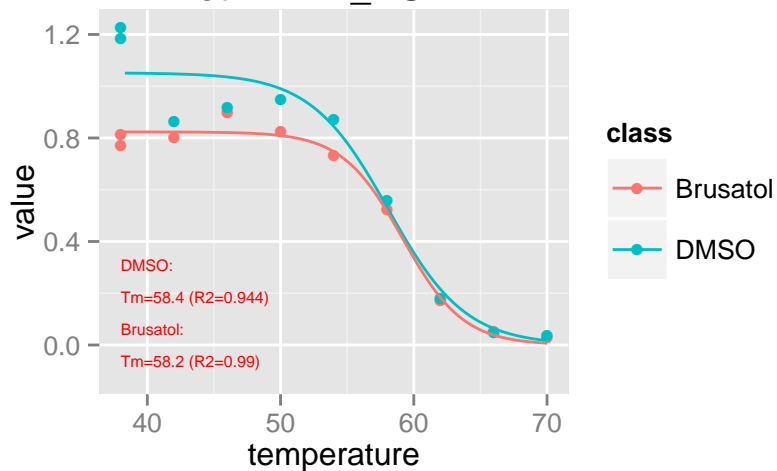

Prot: HEXB\_HUMAN

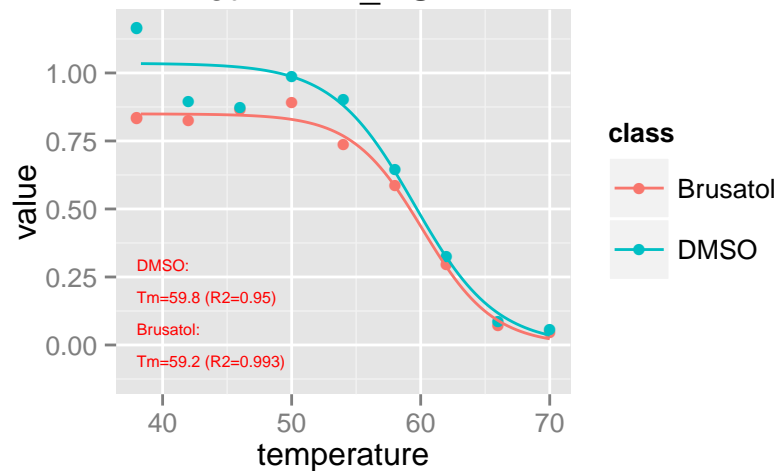

Prot: HEXI1\_HUMAN

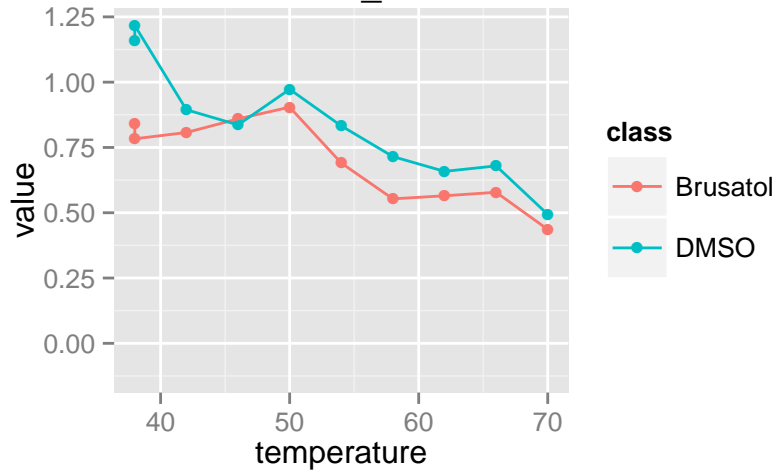

Prot: HEXI2\_HUMAN

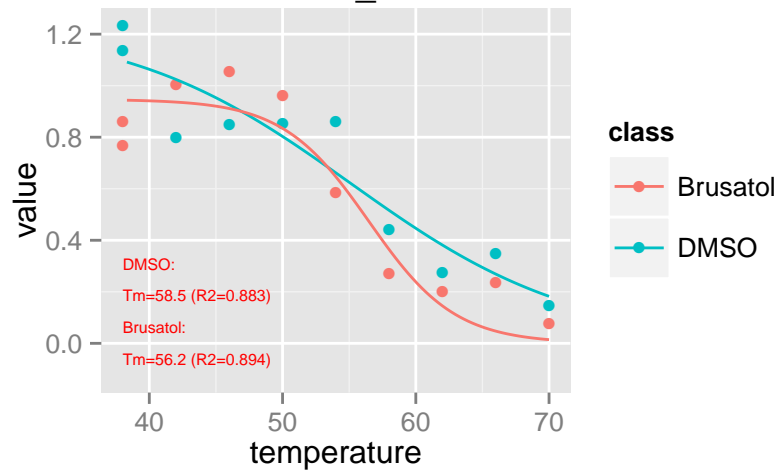

Prot: HGB1A\_HUMAN

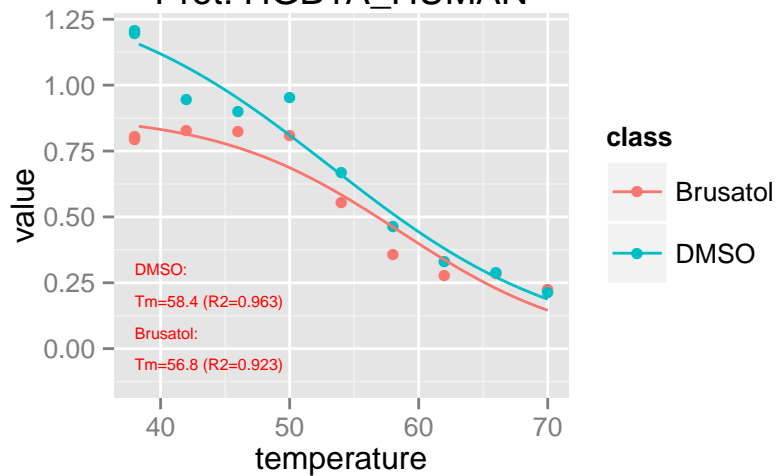

Prot: HGD\_HUMAN

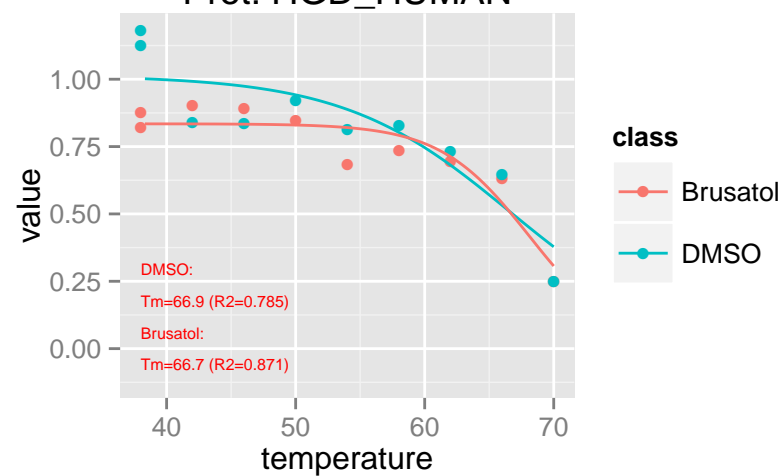

Prot: HGS\_HUMAN

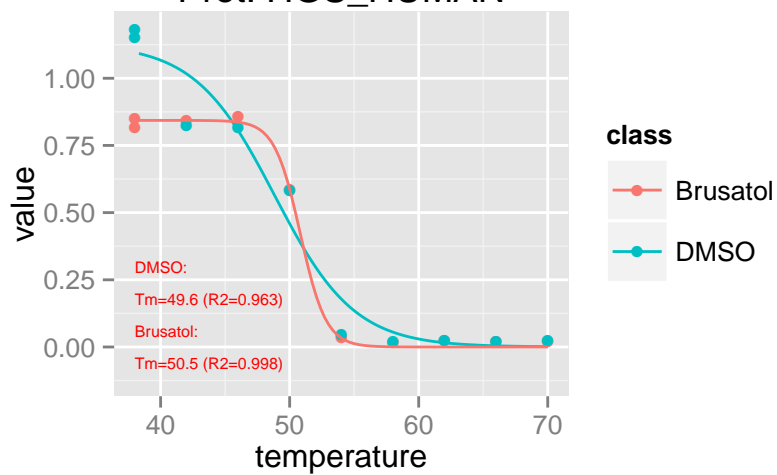

Prot: HIBCH\_HUMAN

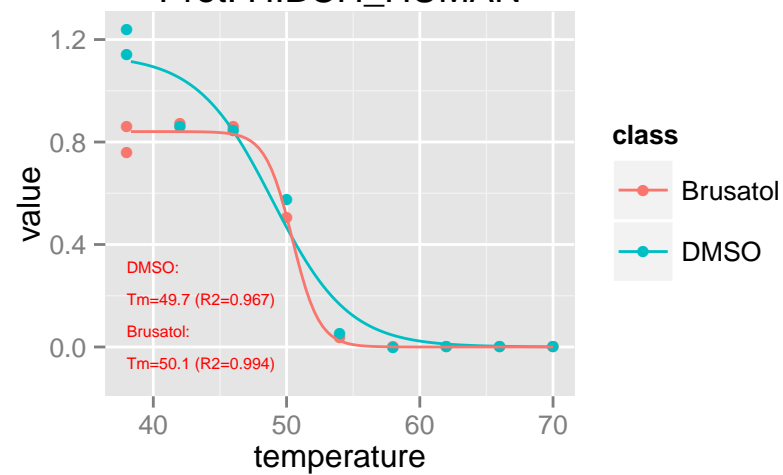

Prot: HIF1N\_HUMAN

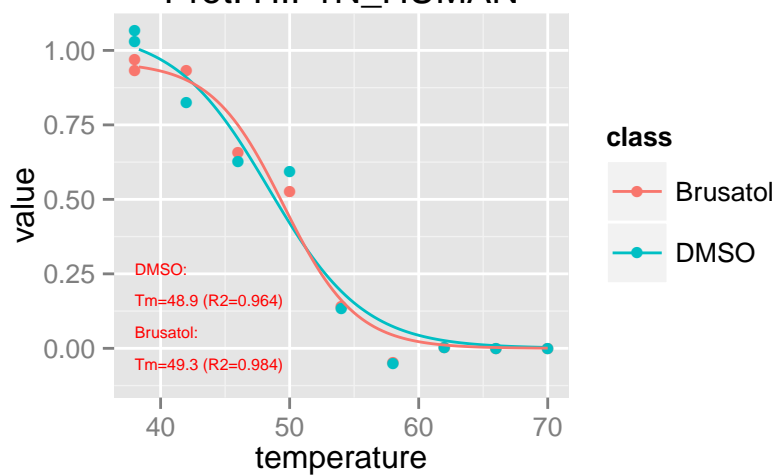

Prot: HINT1\_HUMAN

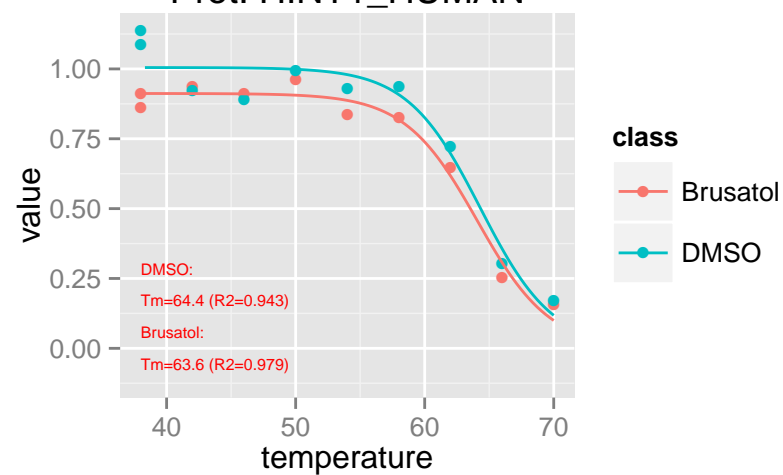

Prot: HINT2\_HUMAN

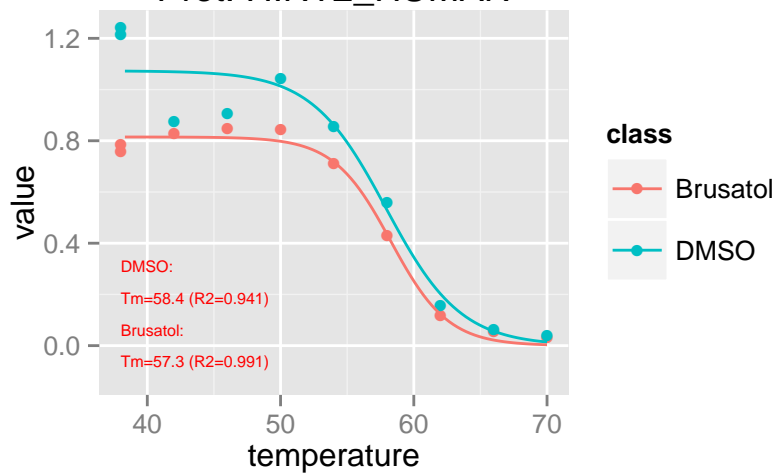

Prot: HMCS1\_HUMAN

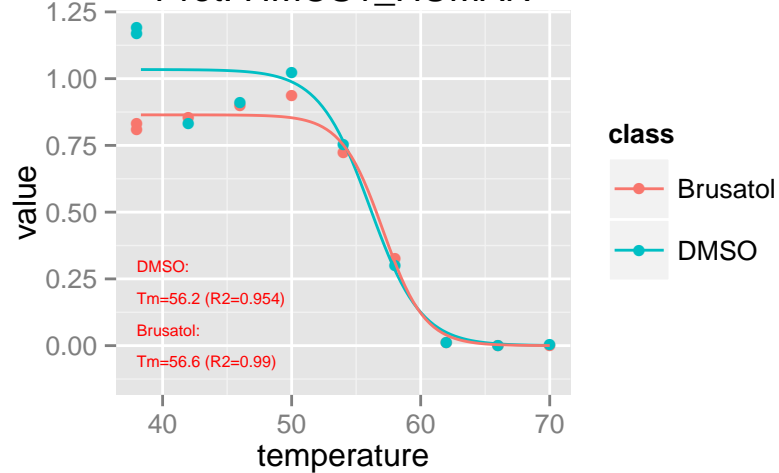

Prot: HMG3M\_HUMAN

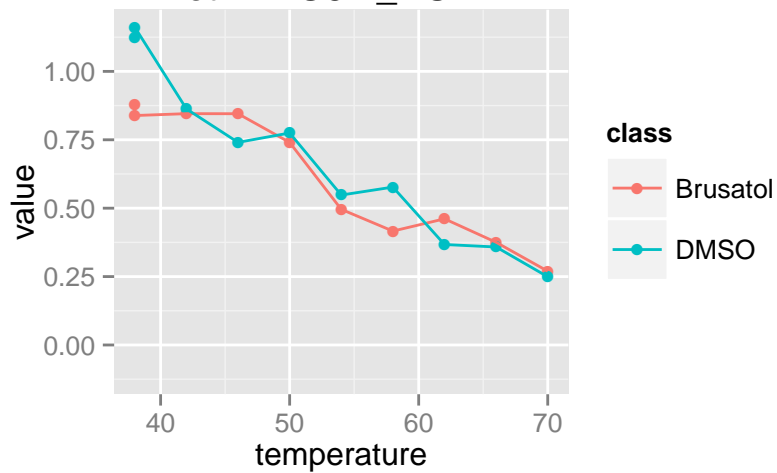

Prot: HMGA1\_HUMAN

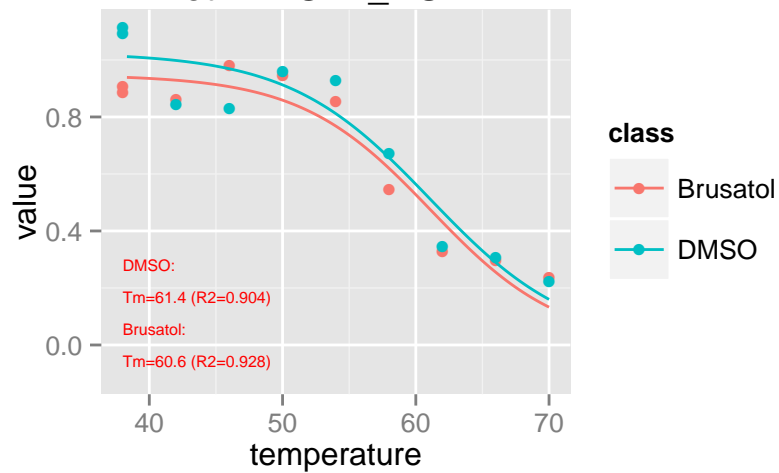

Prot: HMGB1\_HUMAN

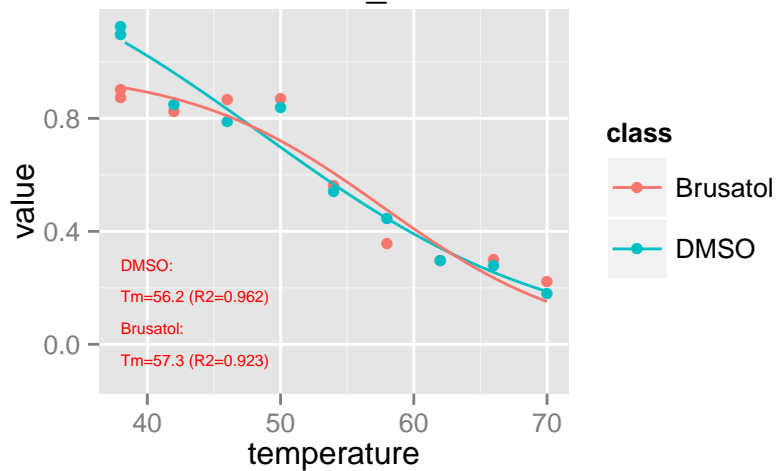

Prot: HMGB2\_HUMAN

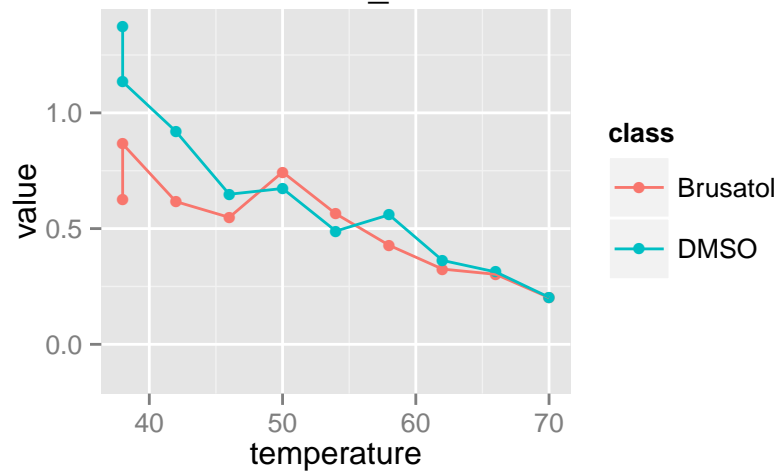

Prot: HMGB3\_HUMAN

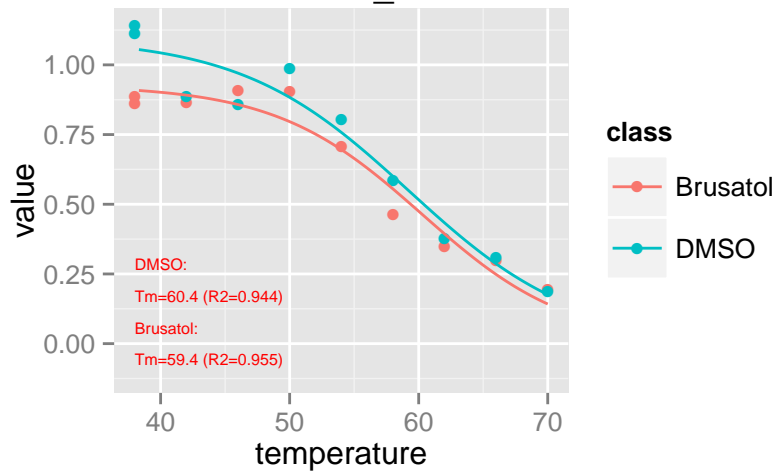

Prot: HMGCL\_HUMAN

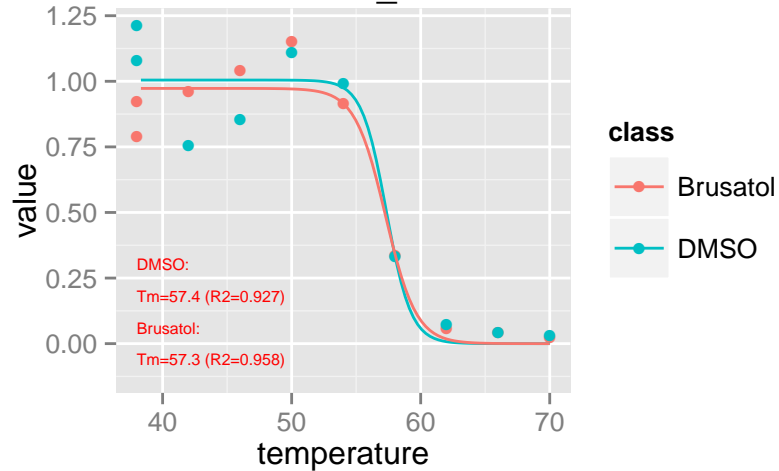

Prot: HMGN1\_HUMAN

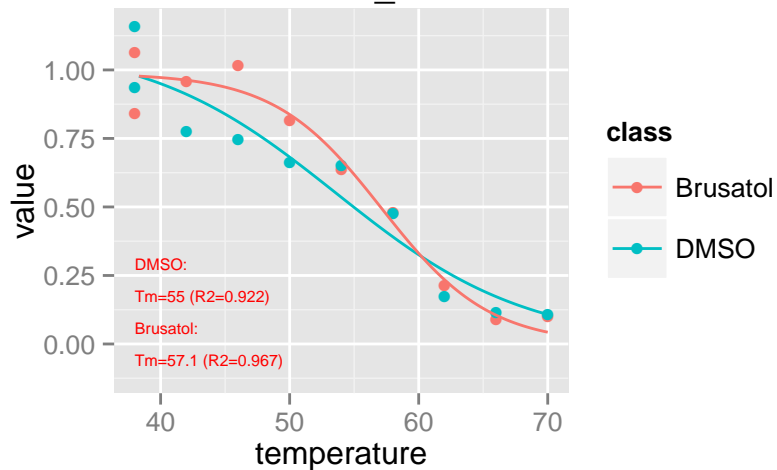

Prot: HMGN2\_HUMAN

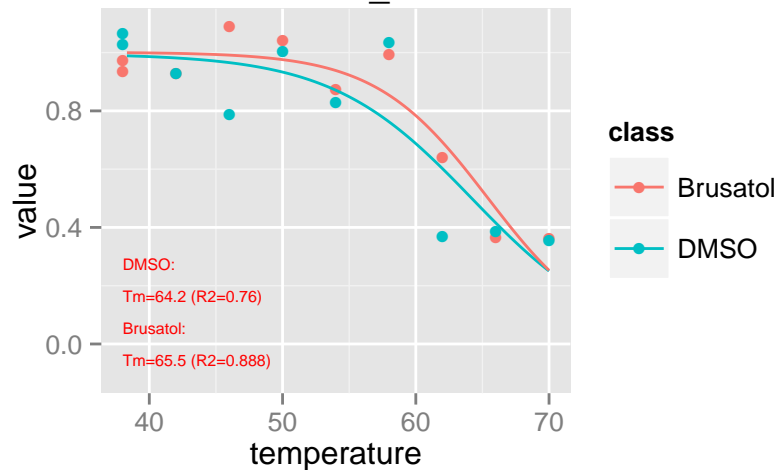

Prot: HMMR\_HUMAN

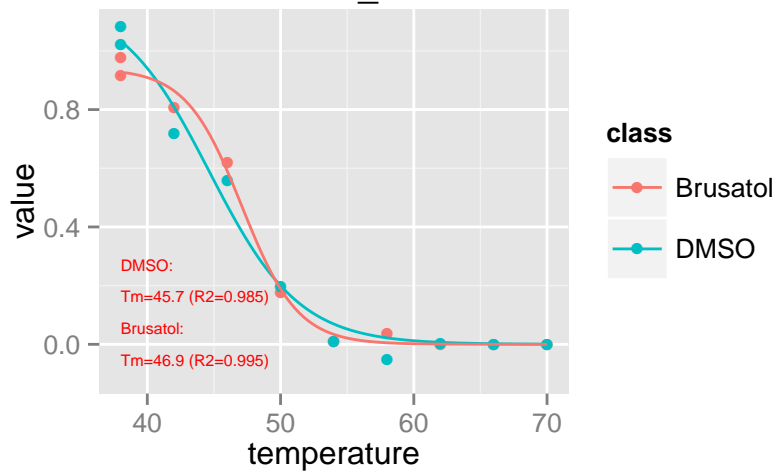

Prot: HN1\_HUMAN

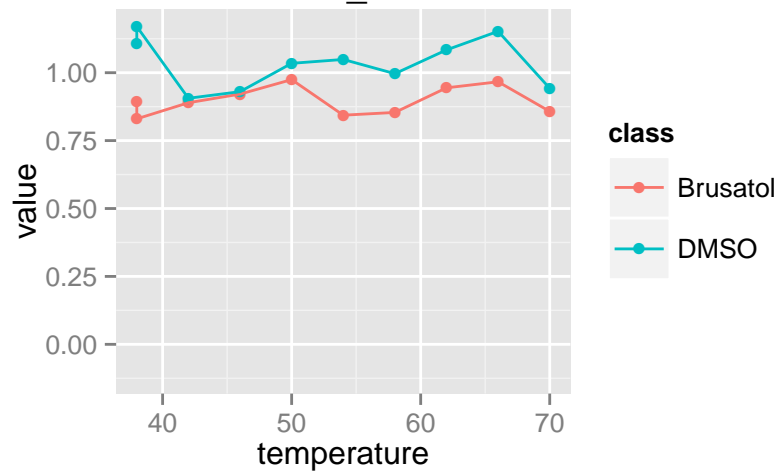

Prot: HN1L\_HUMAN

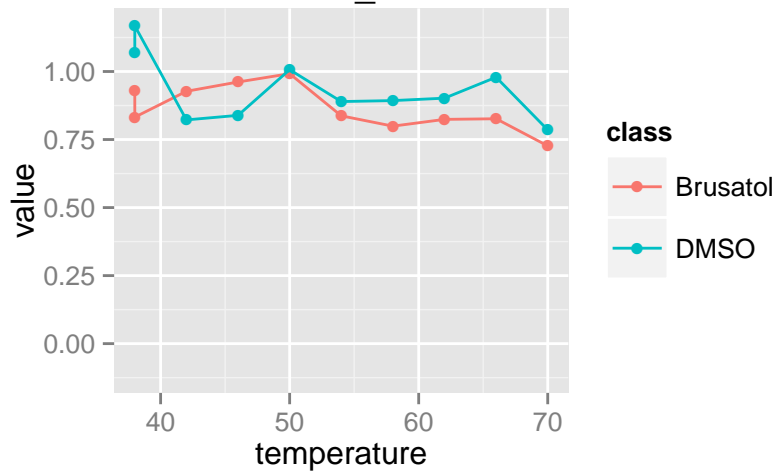

Prot: HNRCL\_HUMAN

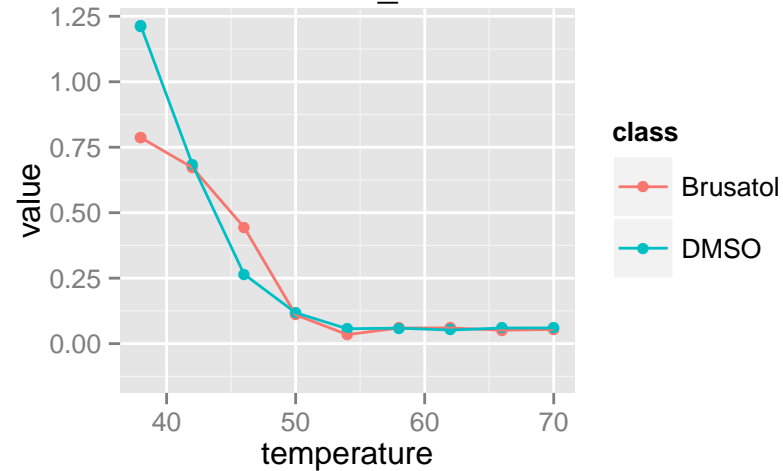

Prot: HNRDL\_HUMAN

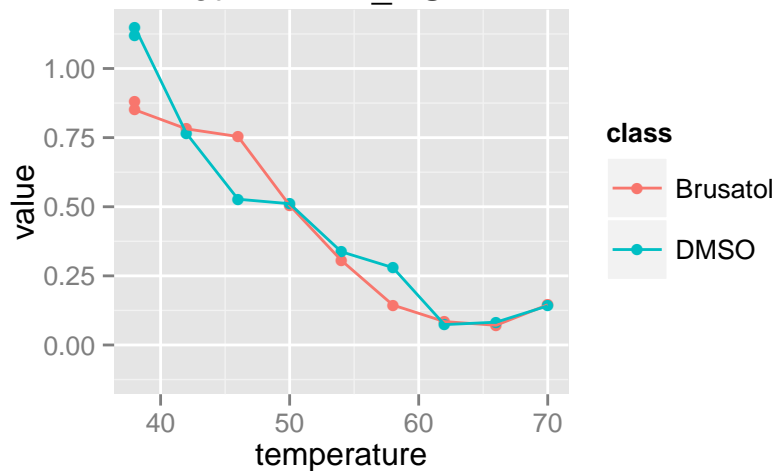

Prot: HNRGT\_HUMAN

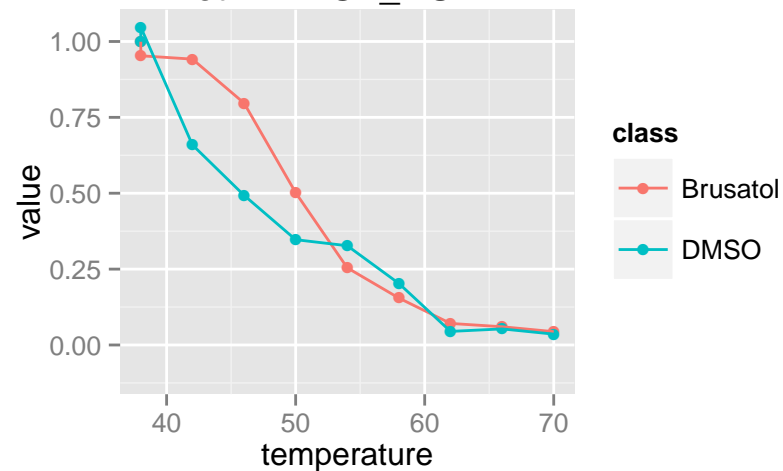

Prot: HNRH1\_HUMAN

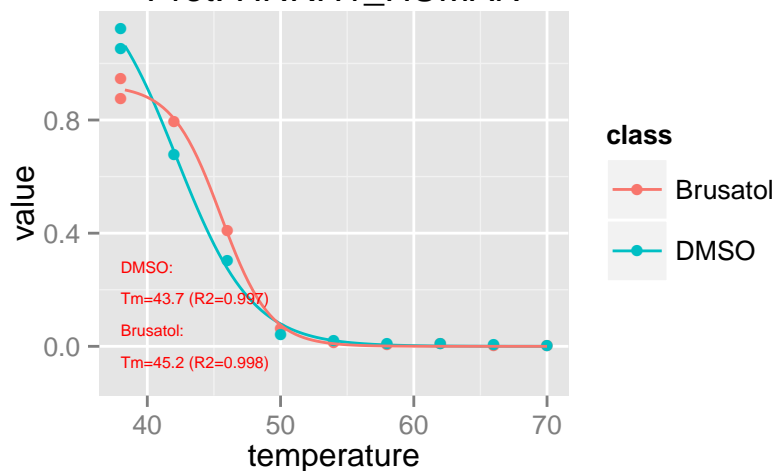

Prot: HNRH2\_HUMAN

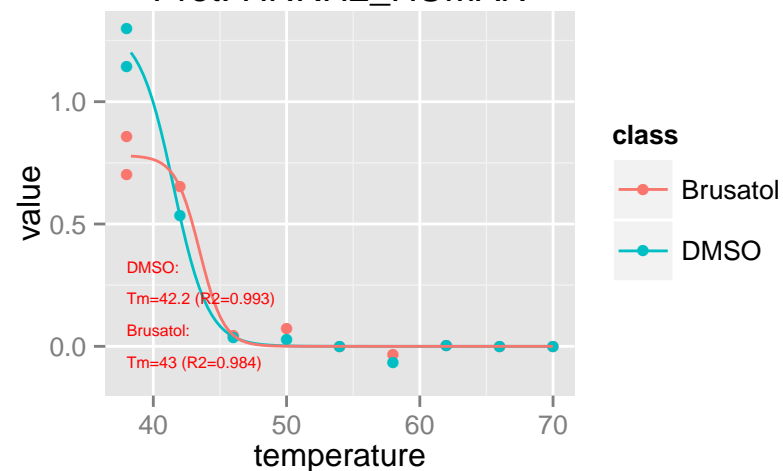

Prot: HNRH3\_HUMAN

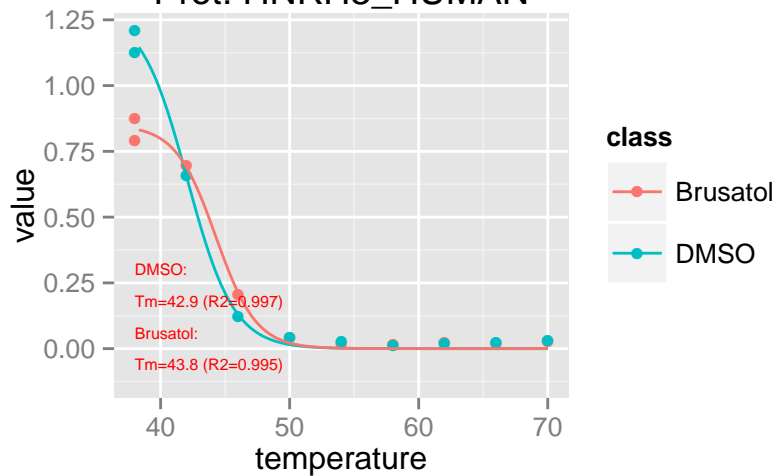

Prot: HNRL1\_HUMAN

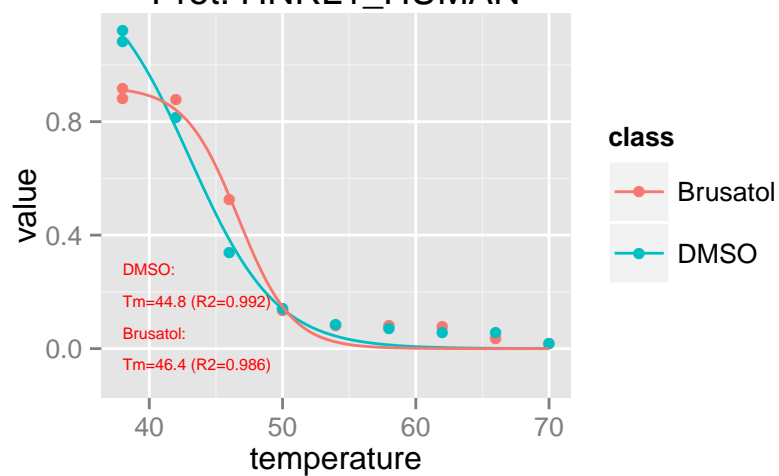

Prot: HNRL2\_HUMAN

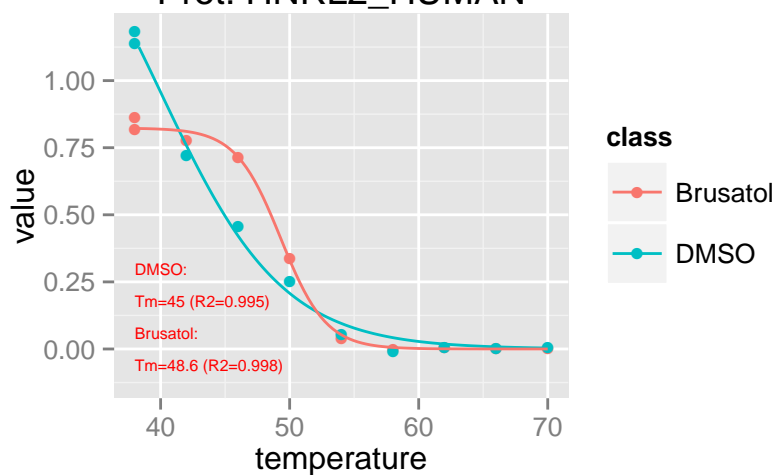

Prot: HNRL1\_HUMAN

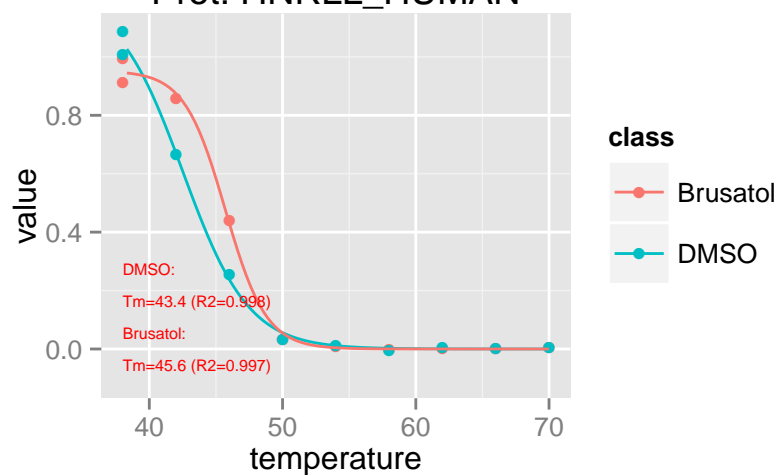

Prot: HNRPC\_HUMAN

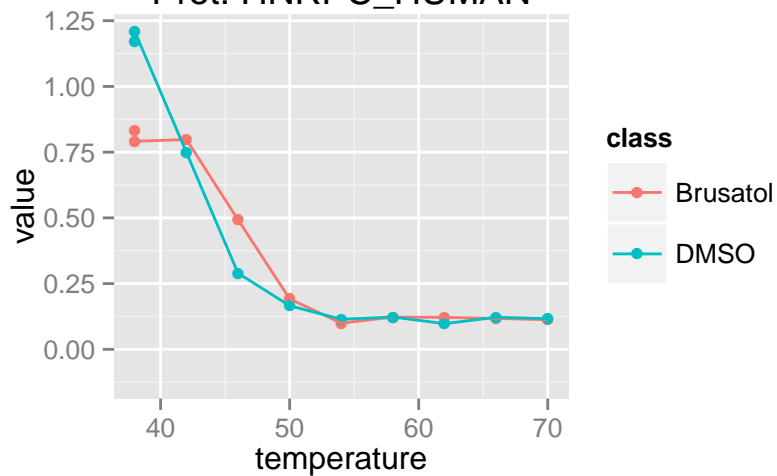

Prot: HNRPD\_HUMAN

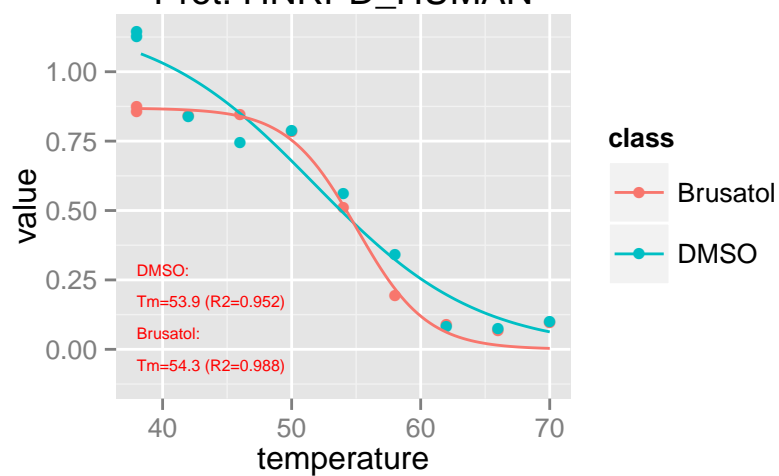

Prot: HNRPF\_HUMAN

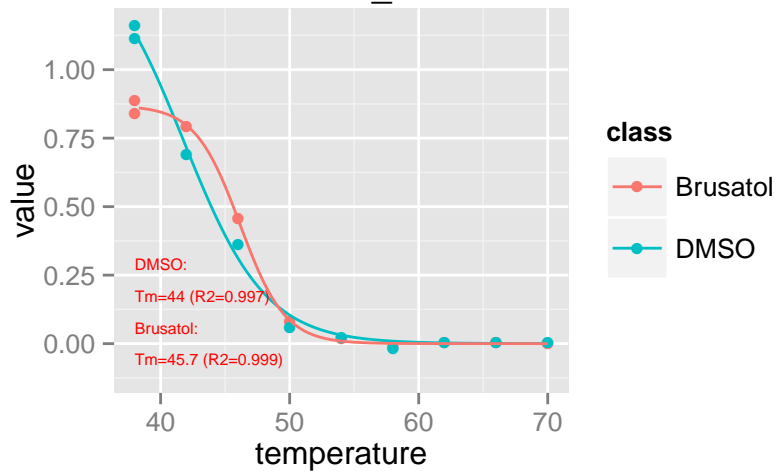

Prot: HNRPG\_HUMAN

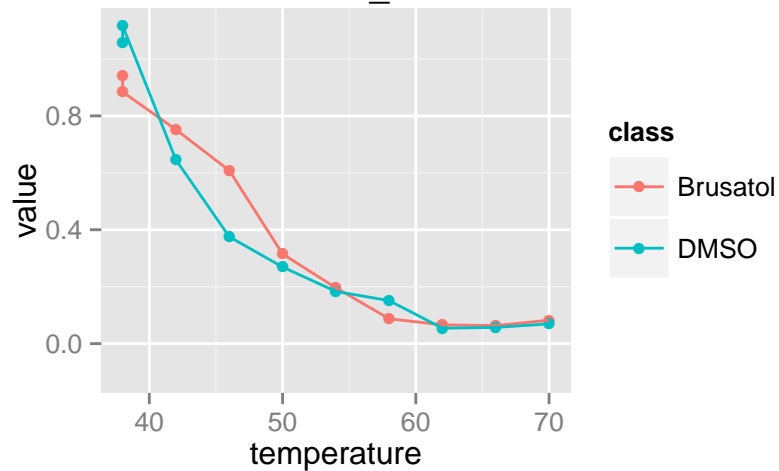

Prot: HNRPK\_HUMAN

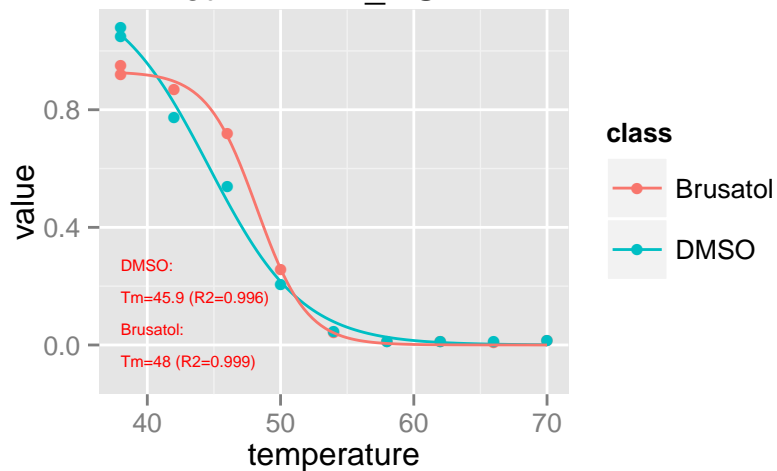

Prot: HNRPL\_HUMAN

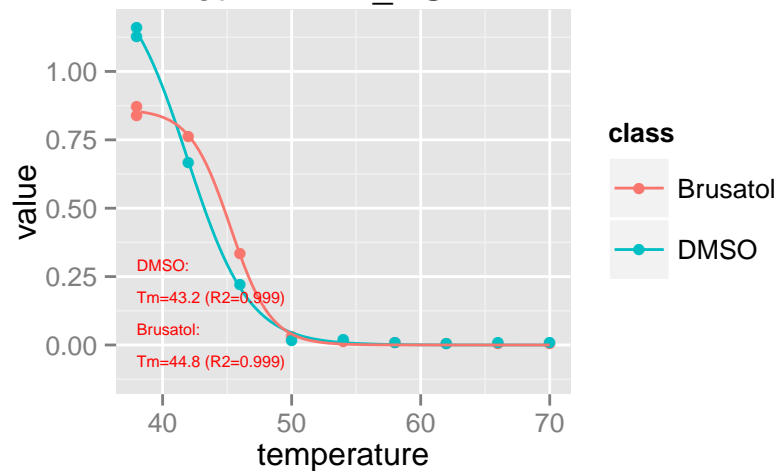

Prot: HNRPM\_HUMAN

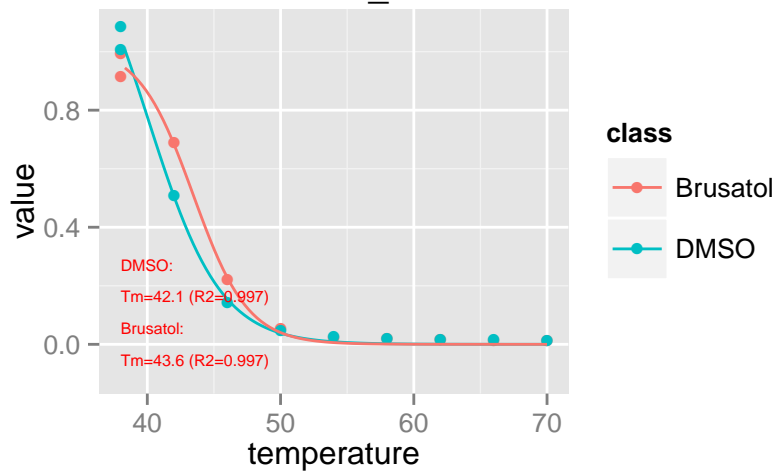

Prot: HNRPQ\_HUMAN

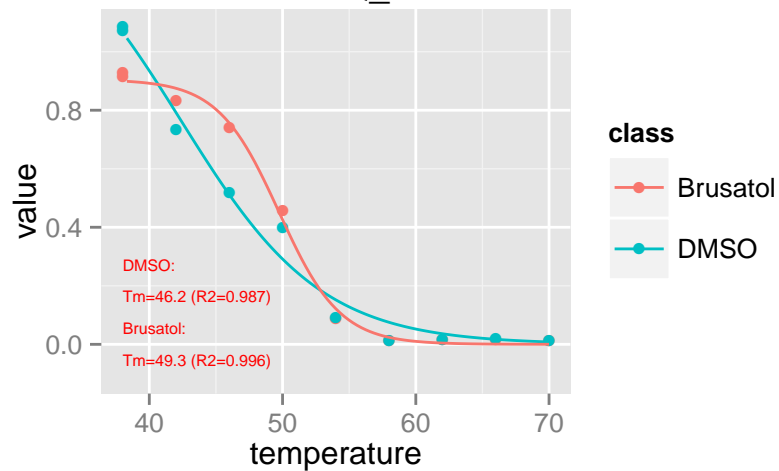

Prot: HNRPR\_HUMAN

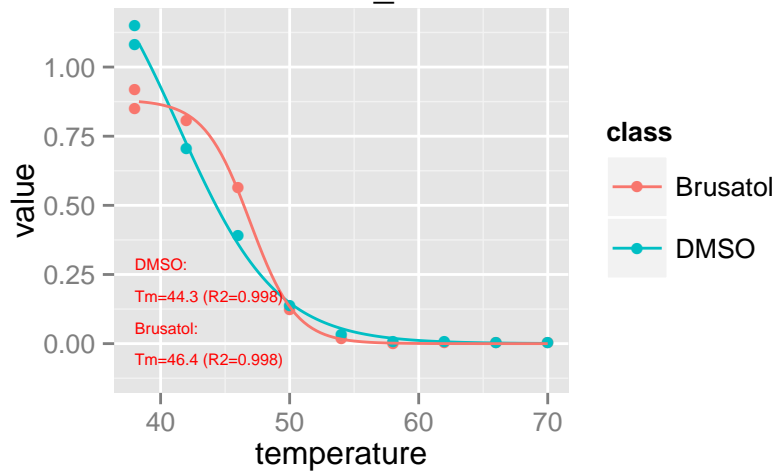

Prot: HNRPU\_HUMAN

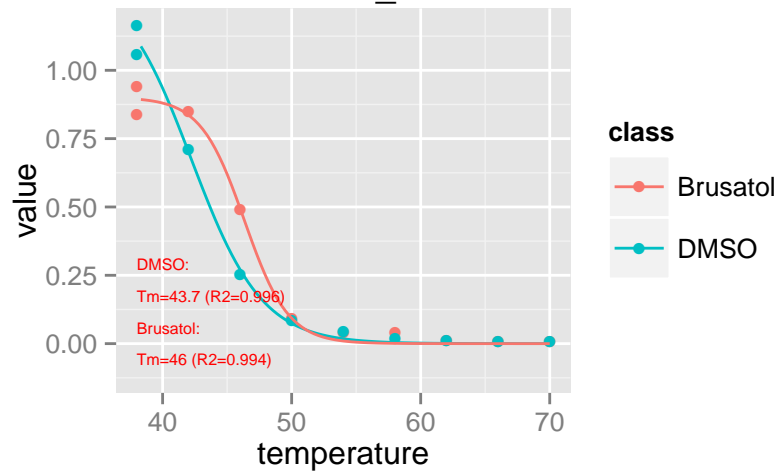

Prot: HOOK3\_HUMAN

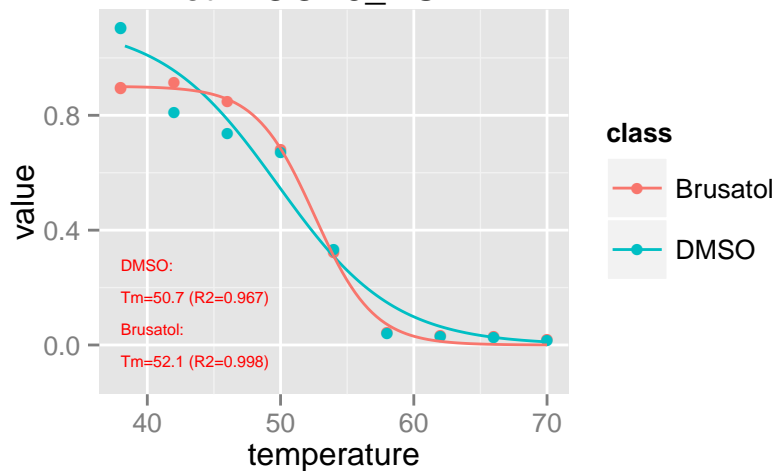

Prot: HP1B3\_HUMAN

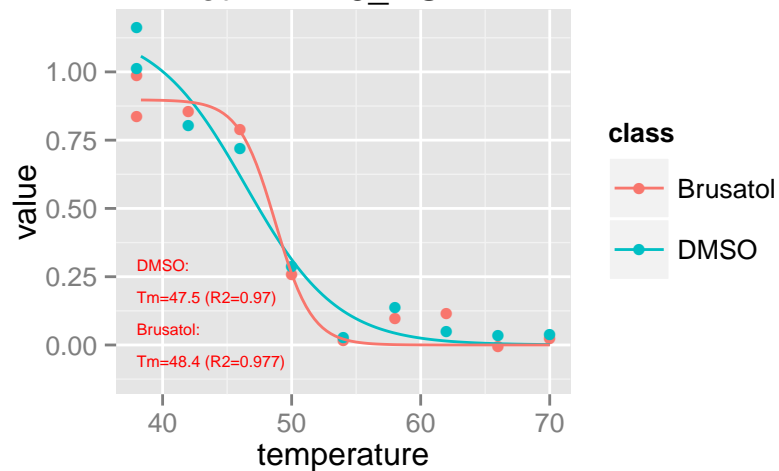

Prot: HPBP1\_HUMAN

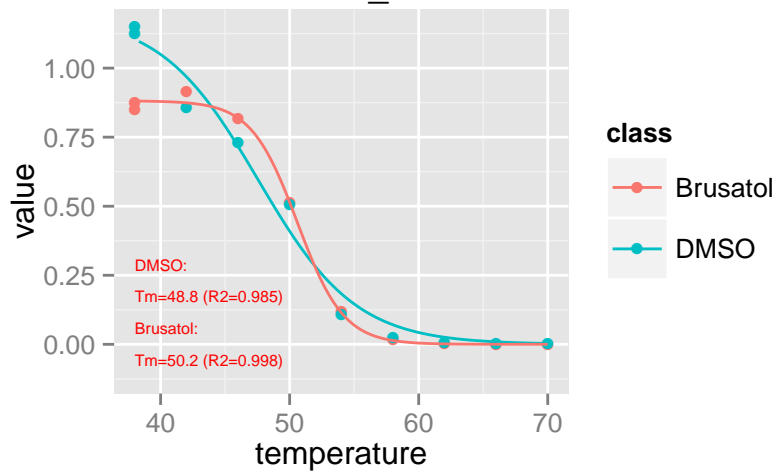

Prot: HPCA\_HUMAN

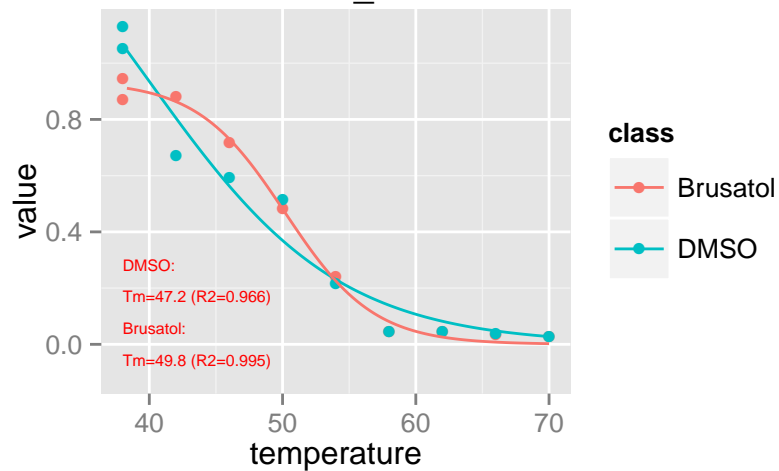



Prot: HPCL1\_HUMAN

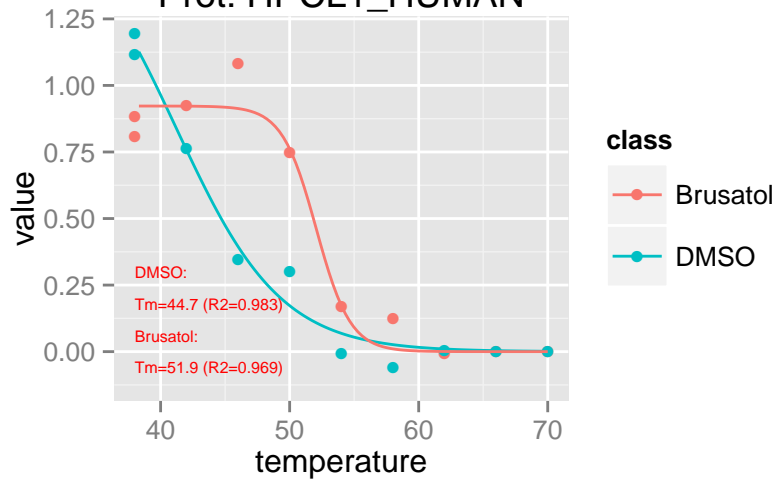

Prot: HPRT\_HUMAN

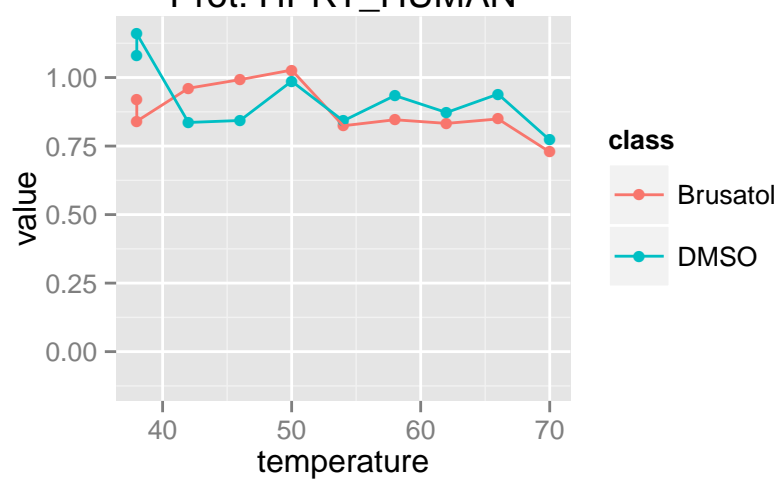

Prot: HPS3\_HUMAN

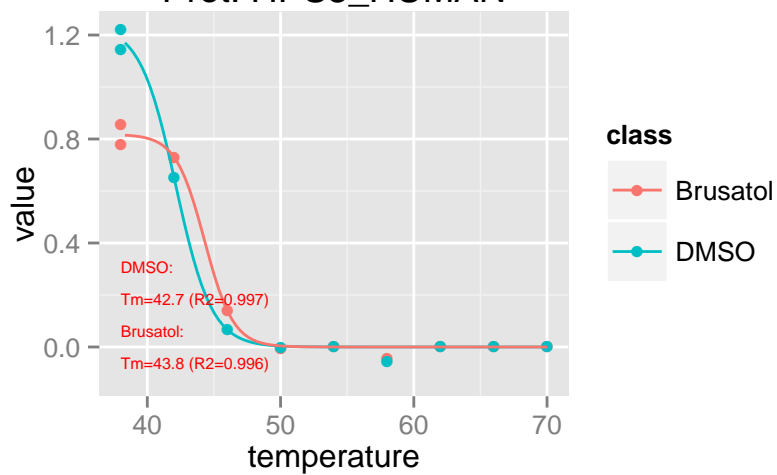

Prot: HS105\_HUMAN

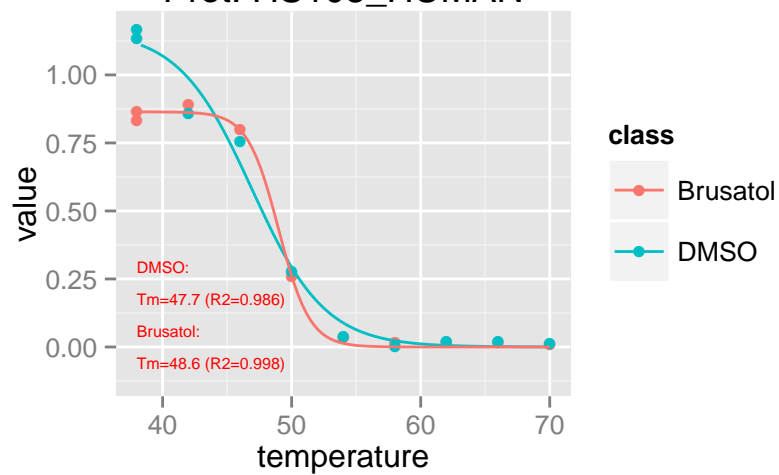

Prot: HS12A\_HUMAN

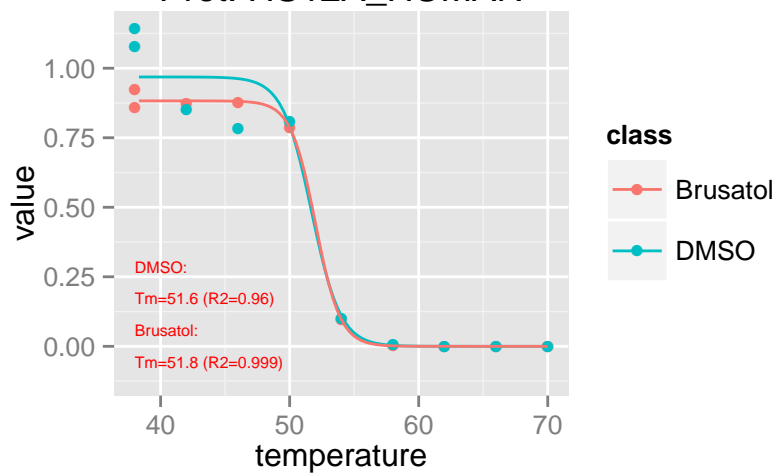

Prot: HS71L\_HUMAN

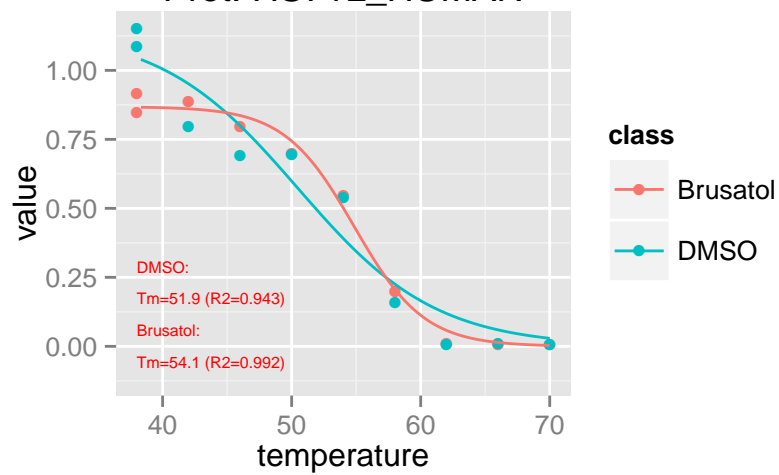

Prot: HS74L\_HUMAN

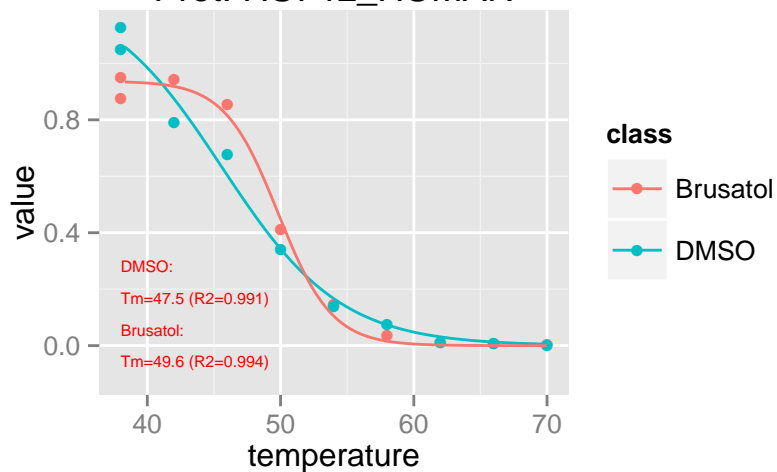

Prot: HS902\_HUMAN

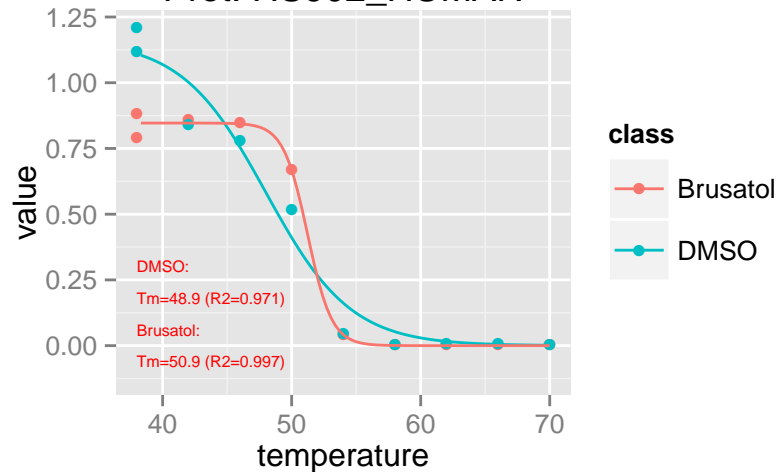

Prot: HS904\_HUMAN

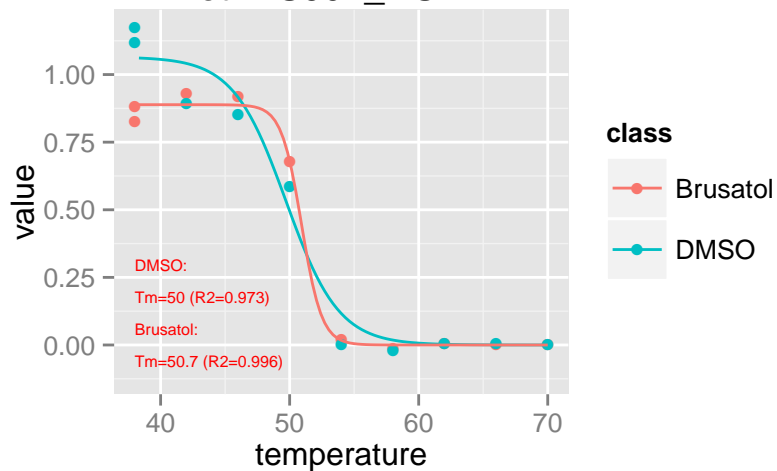

Prot: HS905\_HUMAN

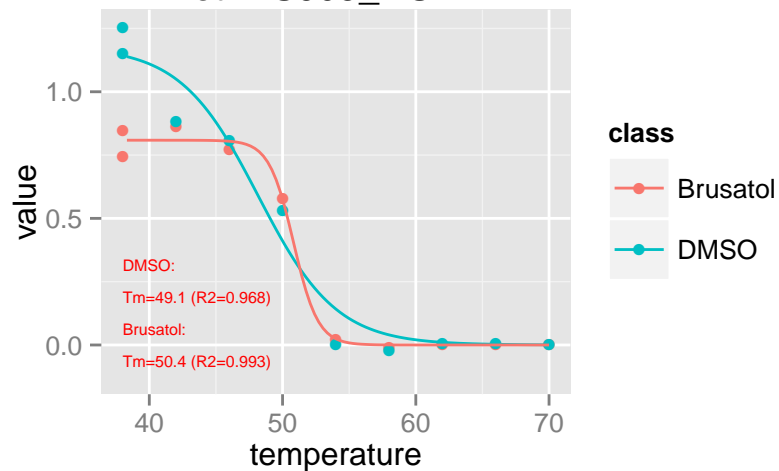

Prot: HS90A\_HUMAN

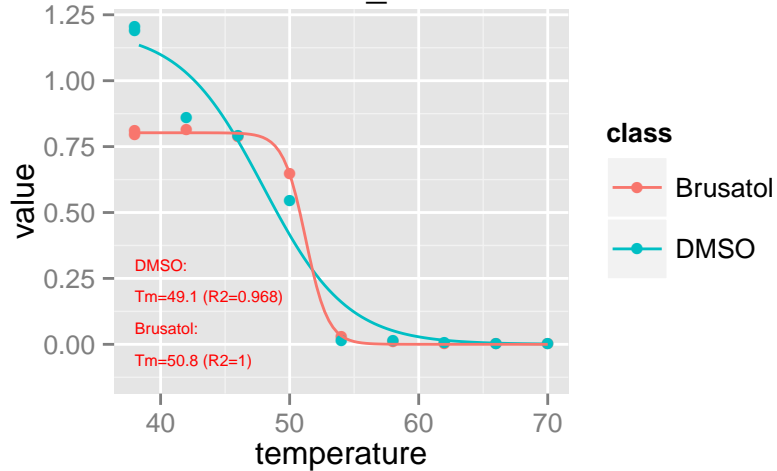

Prot: HS90B\_HUMAN

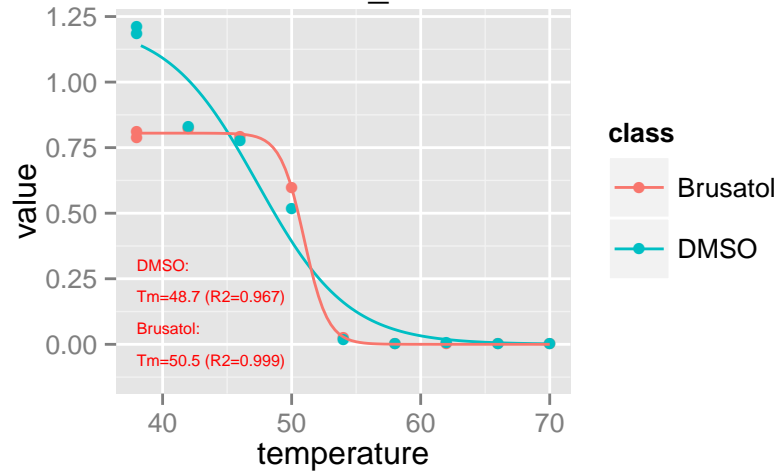

Prot: HSBP1\_HUMAN

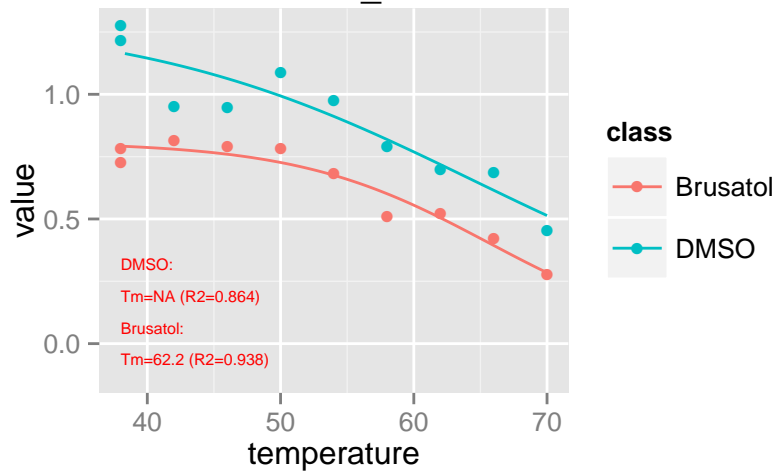

Prot: HSDL2\_HUMAN

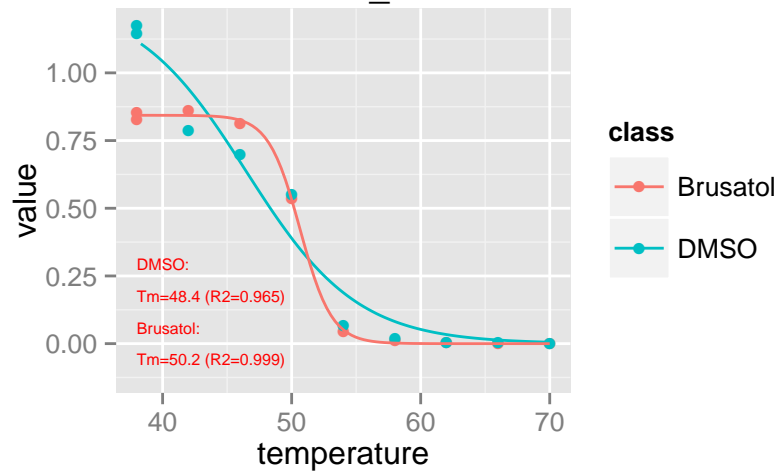

Prot: HSF1\_HUMAN

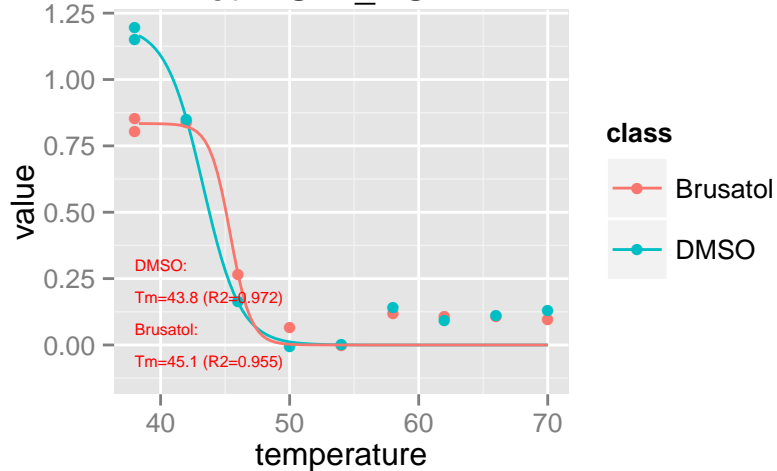

Prot: HSP71\_HUMAN

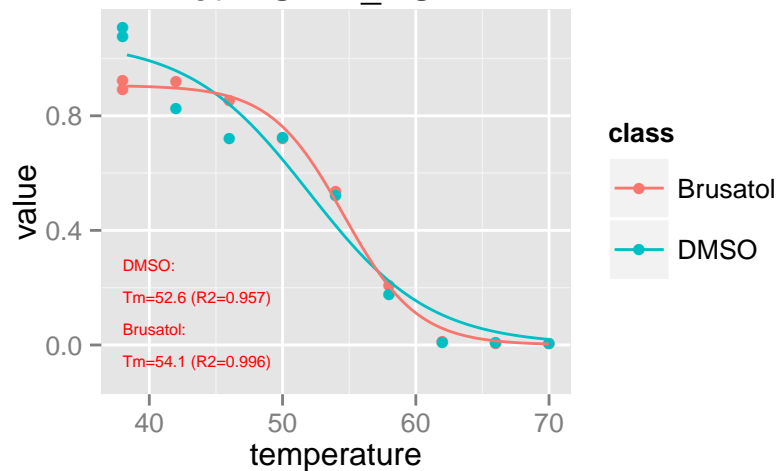

Prot: HSP72\_HUMAN

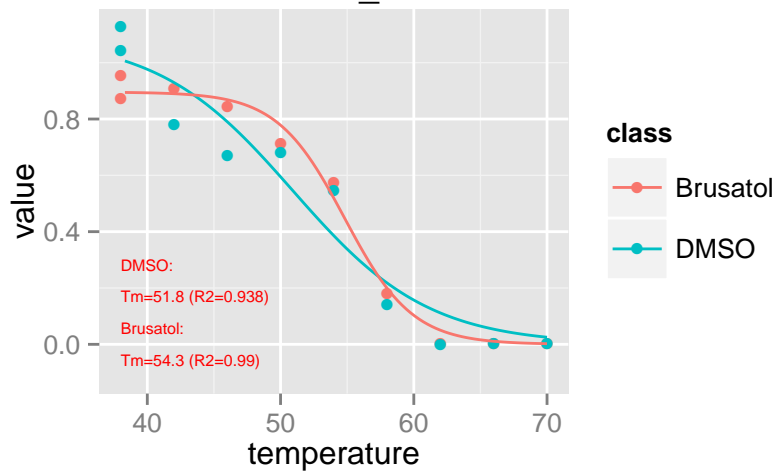

Prot: HSP74\_HUMAN

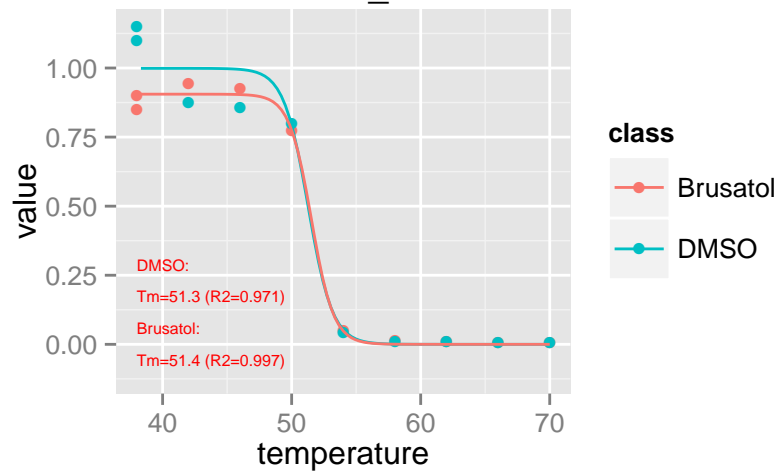

Prot: HSP7C\_HUMAN

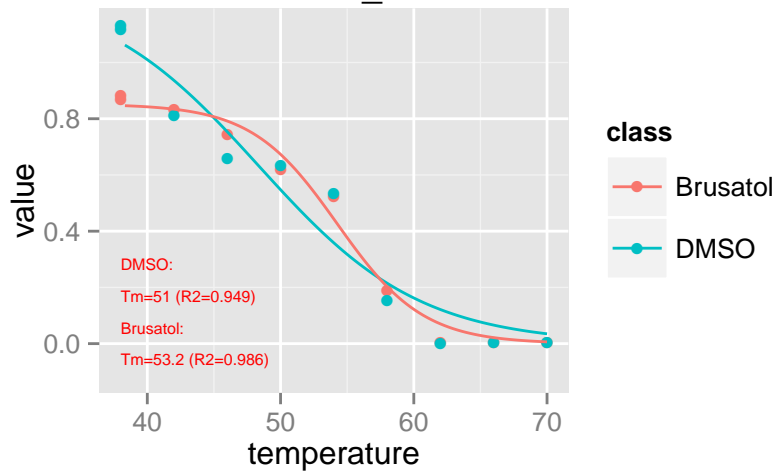

Prot: HSP7E\_HUMAN

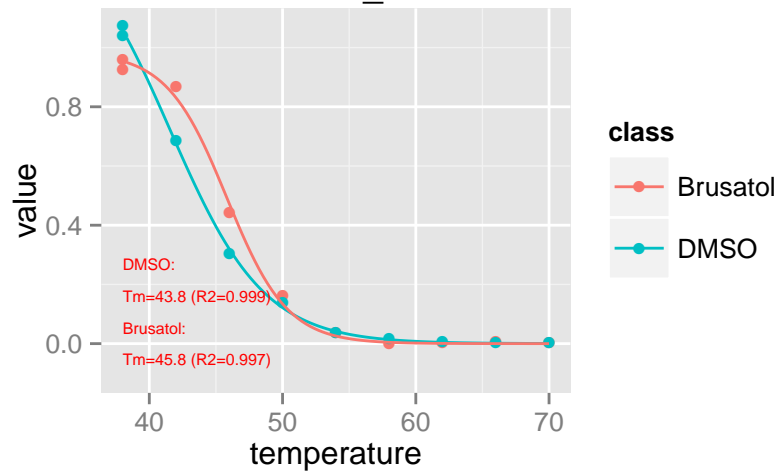

Prot: HSPB1\_HUMAN

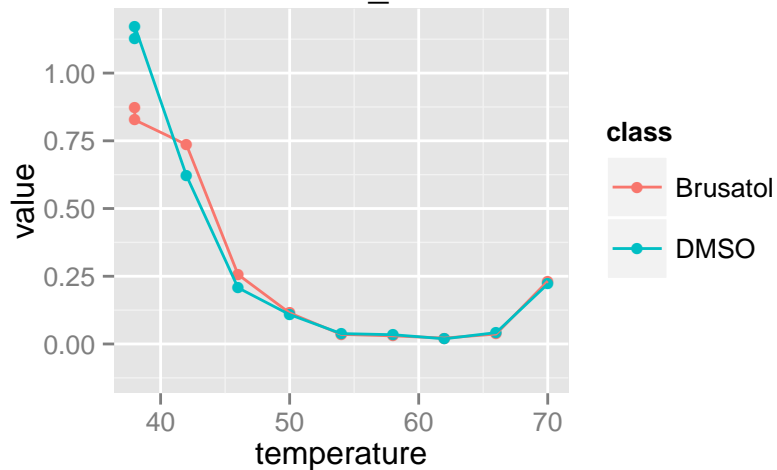

Prot: HTAI2\_HUMAN

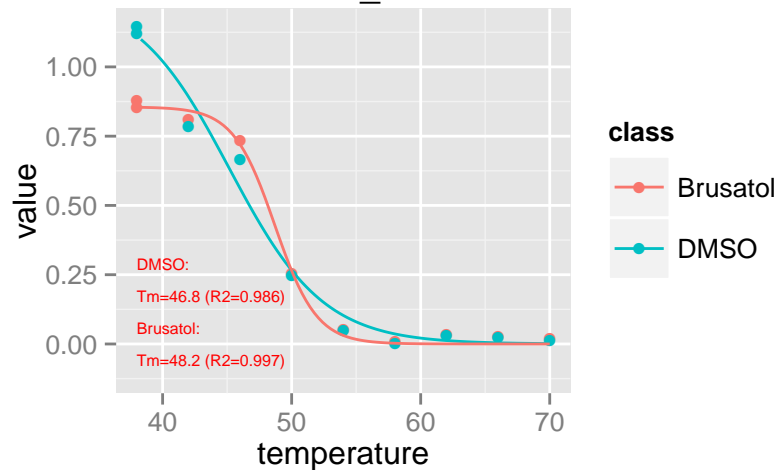

Prot: HTR5A\_HUMAN

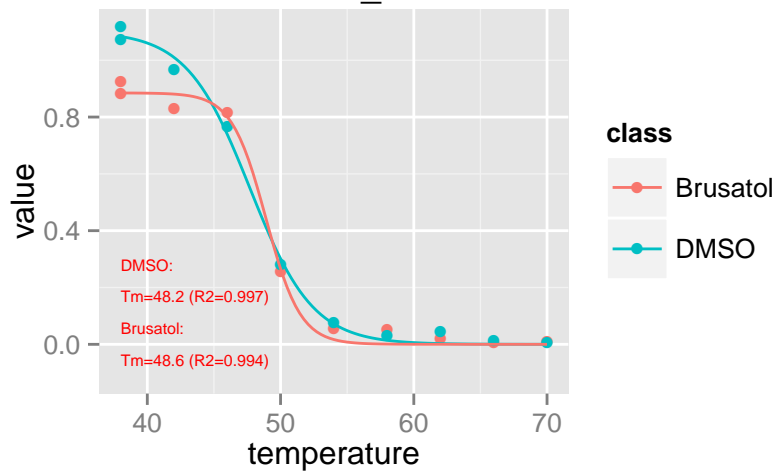

Prot: HTR5B\_HUMAN

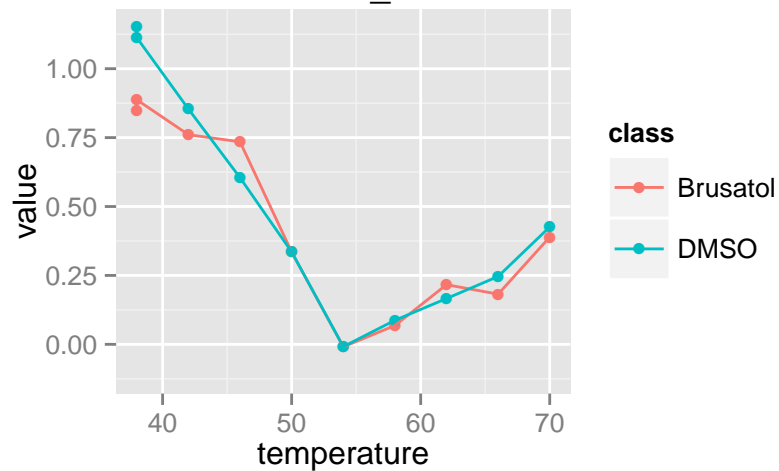

Prot: HTSF1\_HUMAN

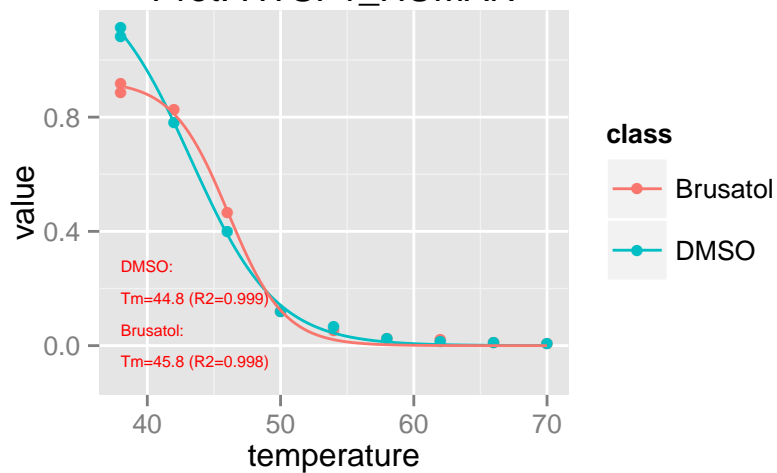

Prot: HUS1\_HUMAN

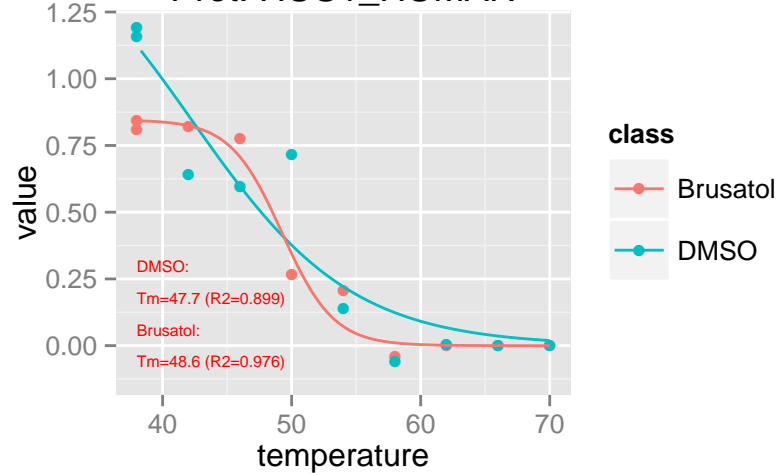

Prot: HUWE1\_HUMAN

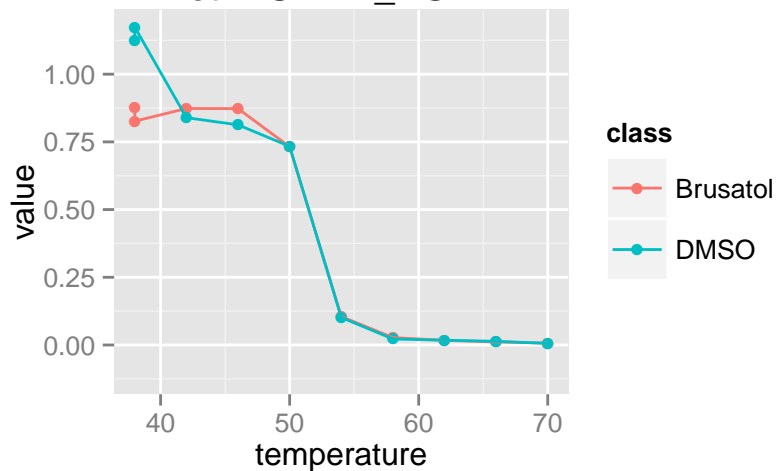

Prot: HXK1\_HUMAN

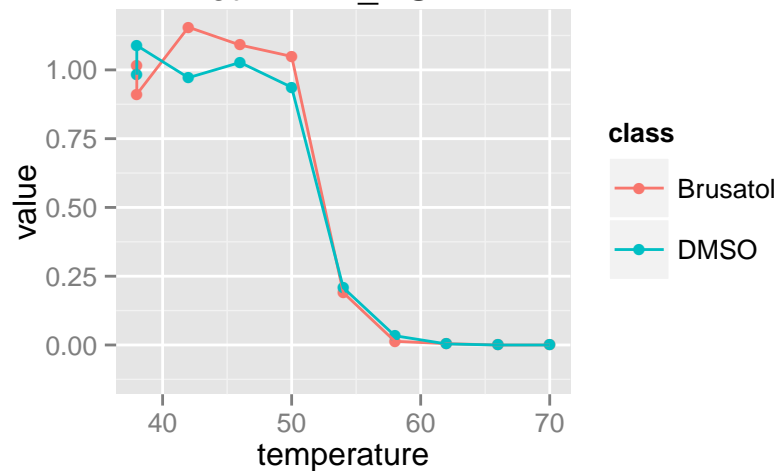

Prot: HYES\_HUMAN

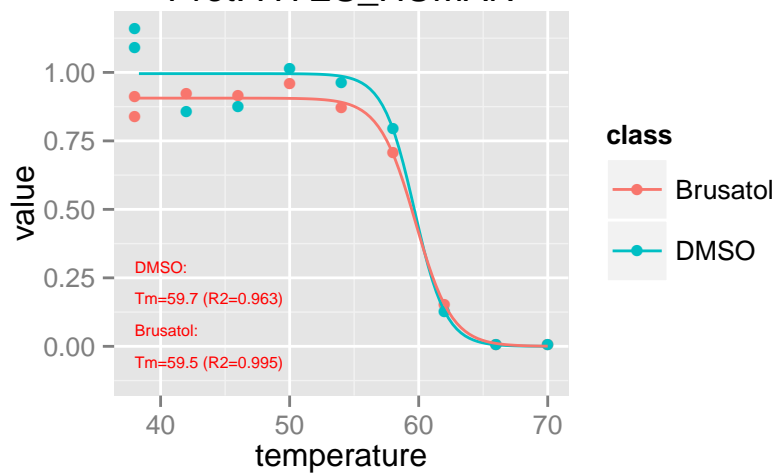

Prot: HYOU1\_HUMAN

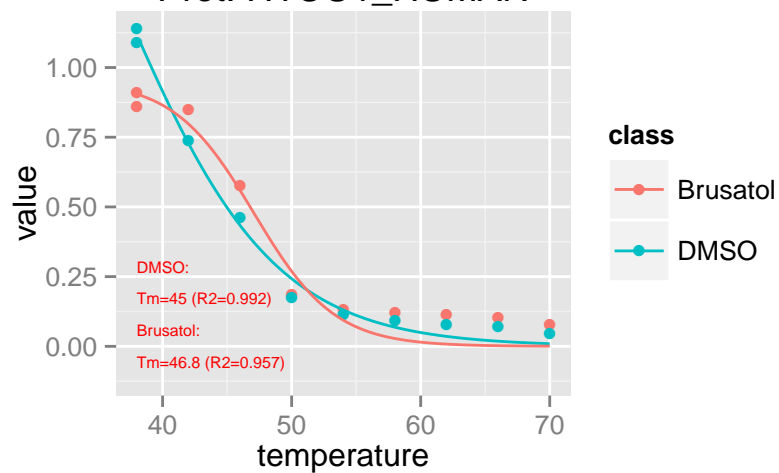

Prot: HYPK\_HUMAN

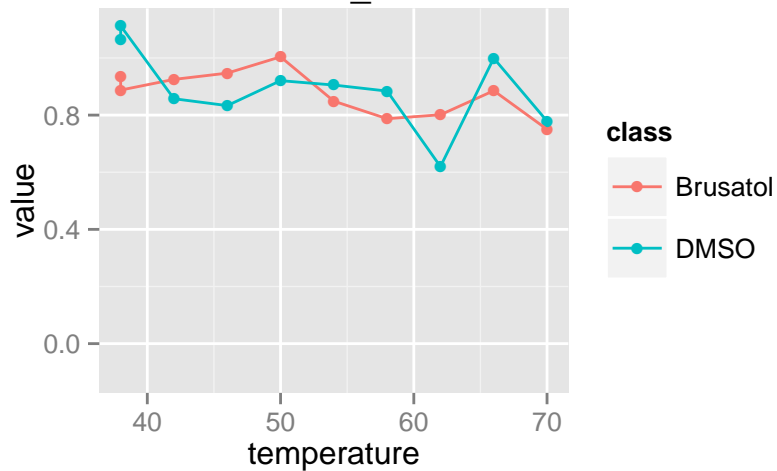

Prot: I2BP1\_HUMAN

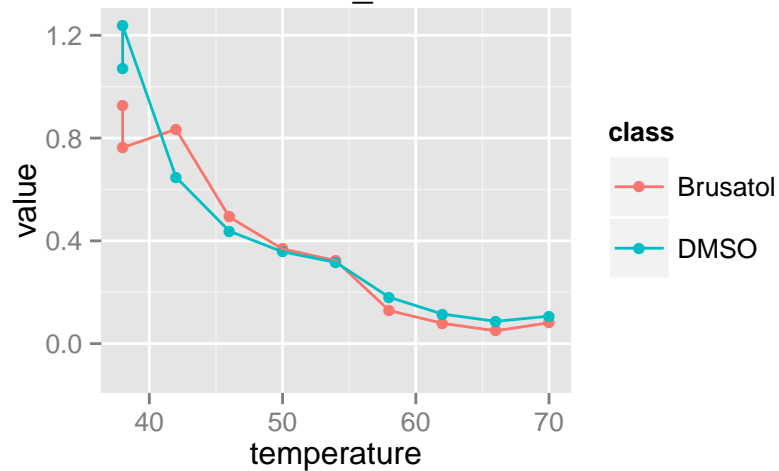

Prot: I2BP2\_HUMAN

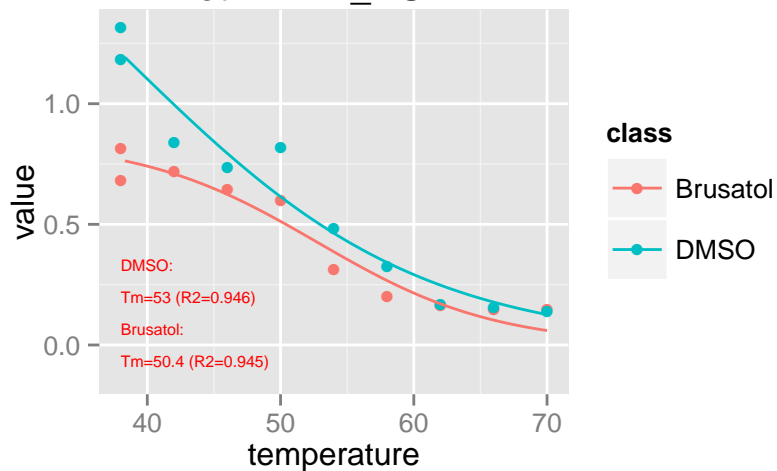

Prot: I2BPL\_HUMAN

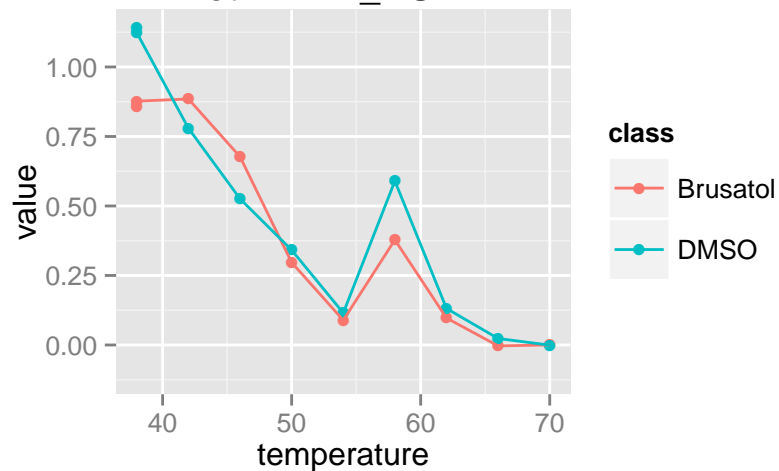

Prot: IAH1\_HUMAN

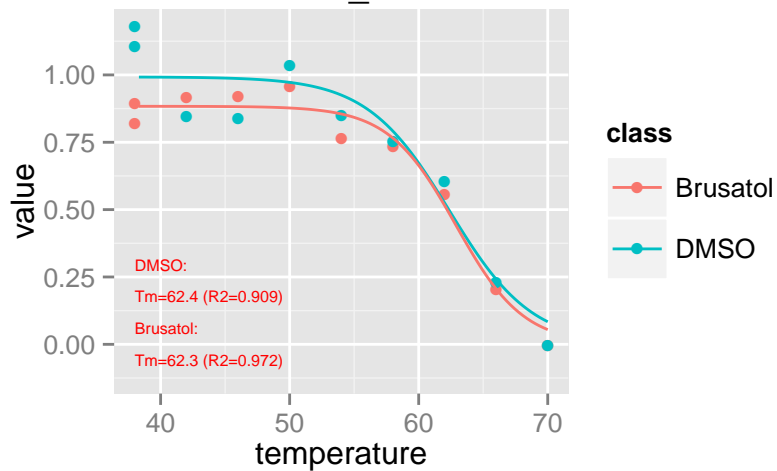

Prot: IASPP\_HUMAN

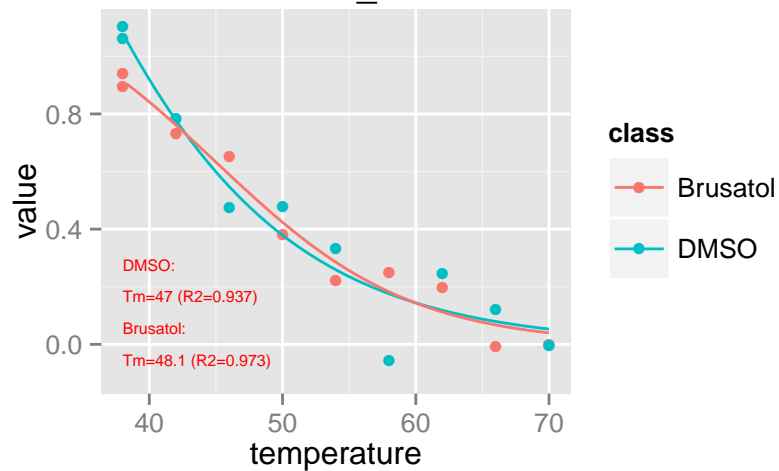

Prot: IBP4\_HUMAN

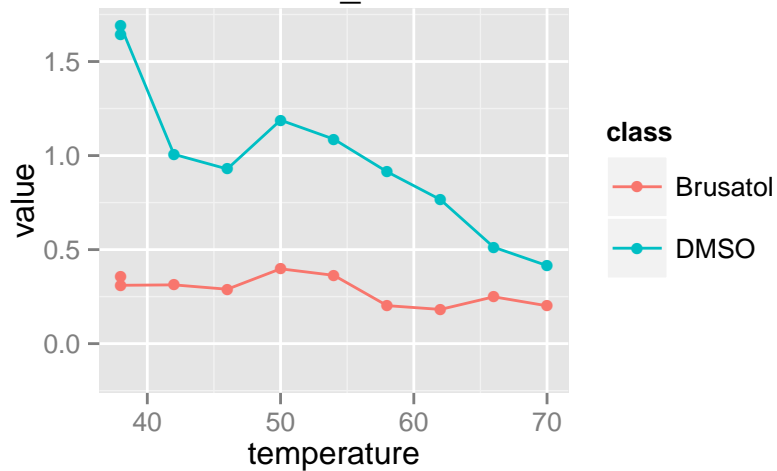

Prot: ICAL\_HUMAN

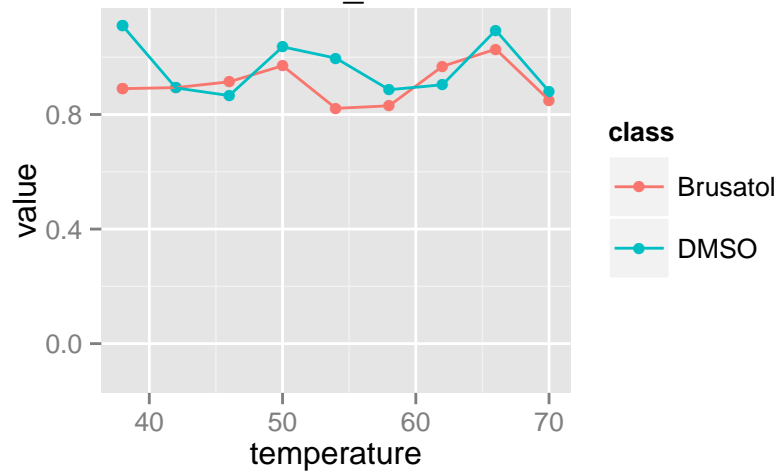

Prot: ICLN\_HUMAN

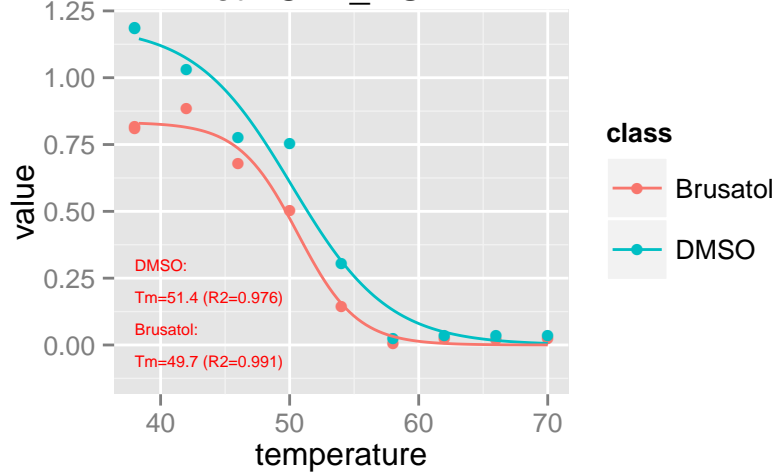

Prot: ICT1\_HUMAN

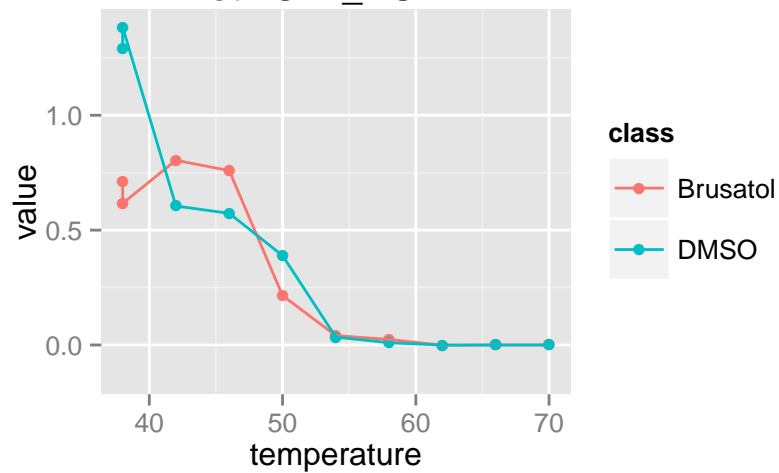

Prot: IDE\_HUMAN

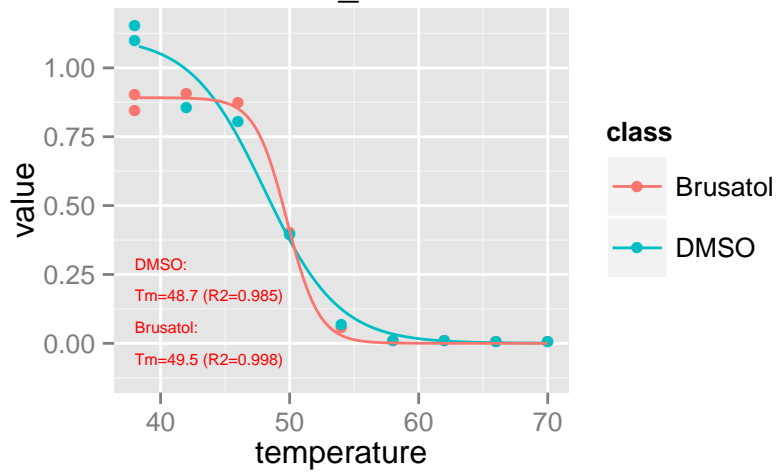

Prot: IDH3A\_HUMAN

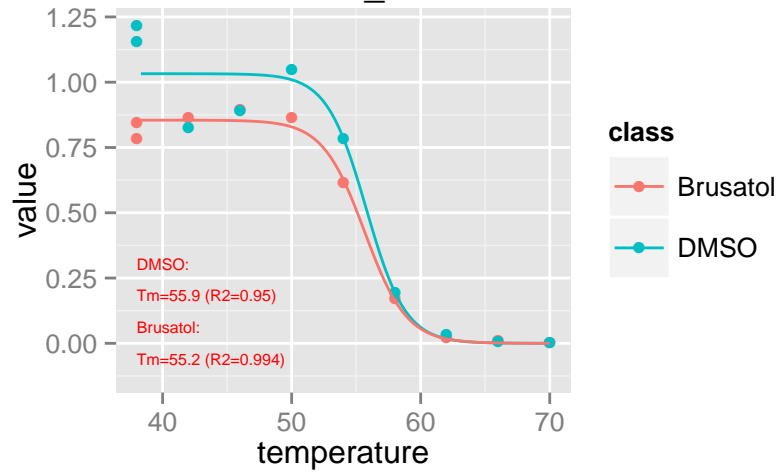

Prot: IDH3B\_HUMAN

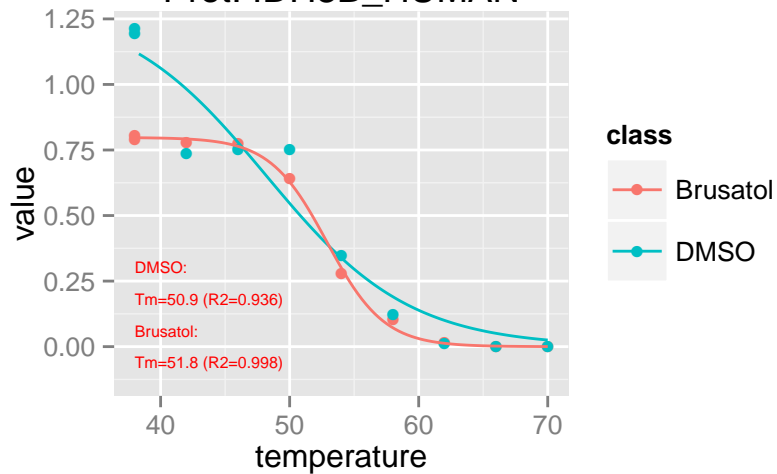

Prot: IDH3G\_HUMAN

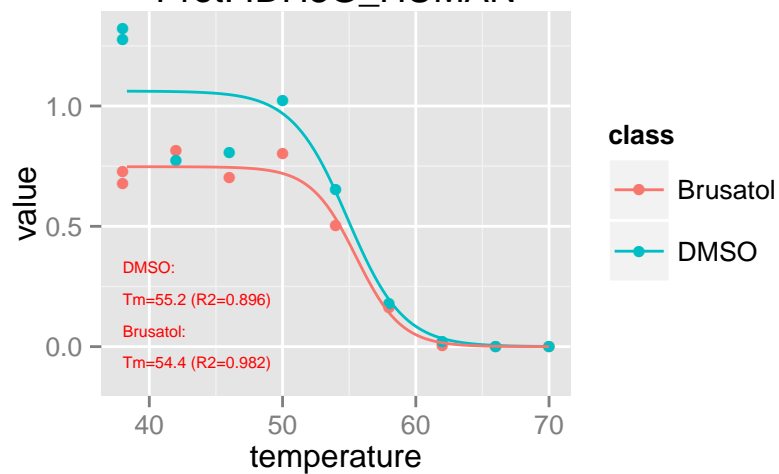

Prot: IDHC\_HUMAN

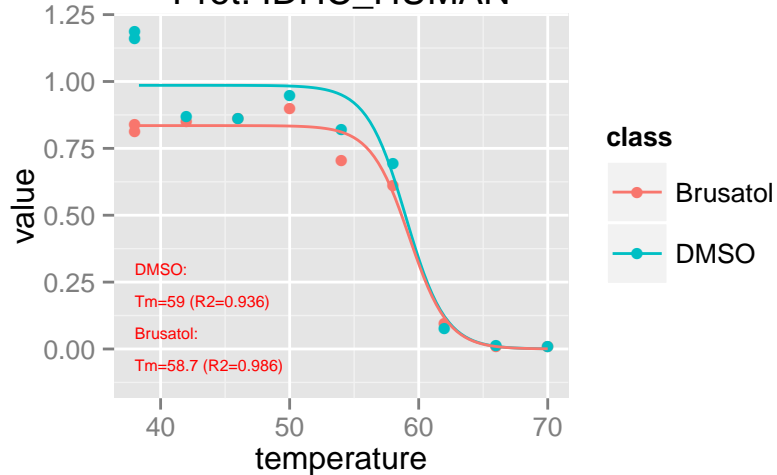

Prot: IDHP\_HUMAN

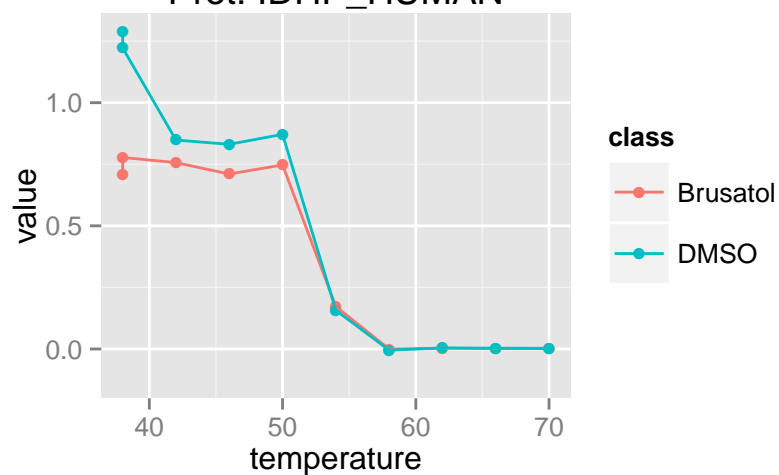

Prot: IDI1\_HUMAN

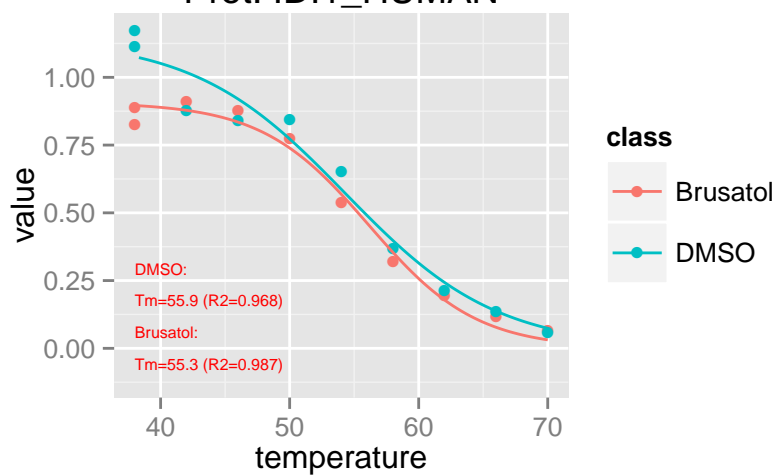

Prot: IF1AX\_HUMAN

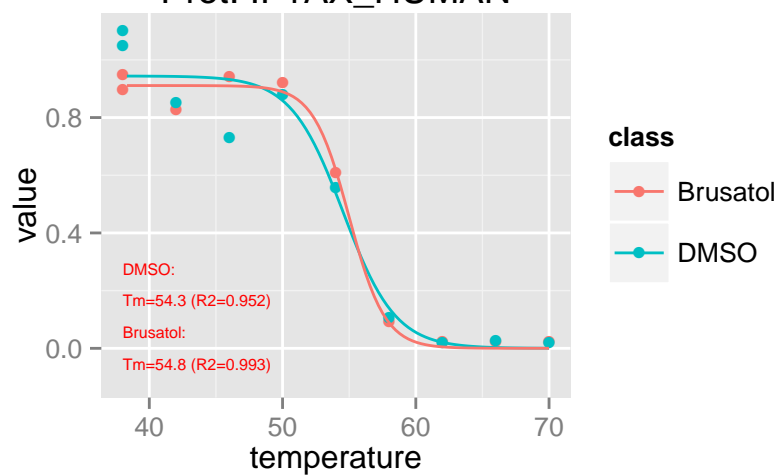



Prot: IF1AY\_HUMAN

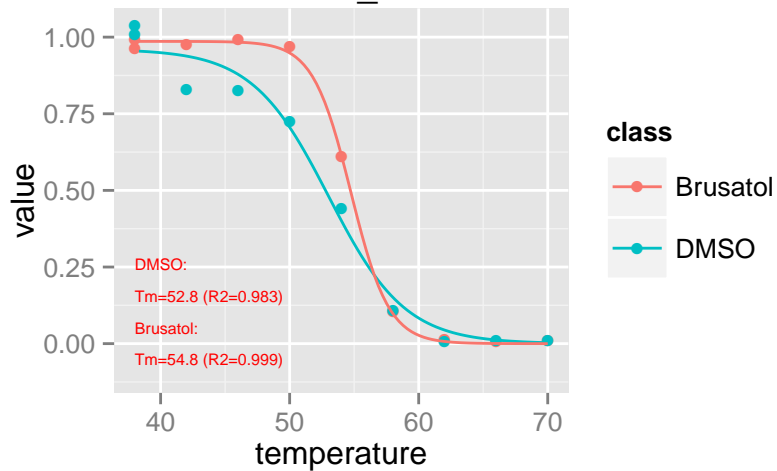

Prot: IF2A\_HUMAN

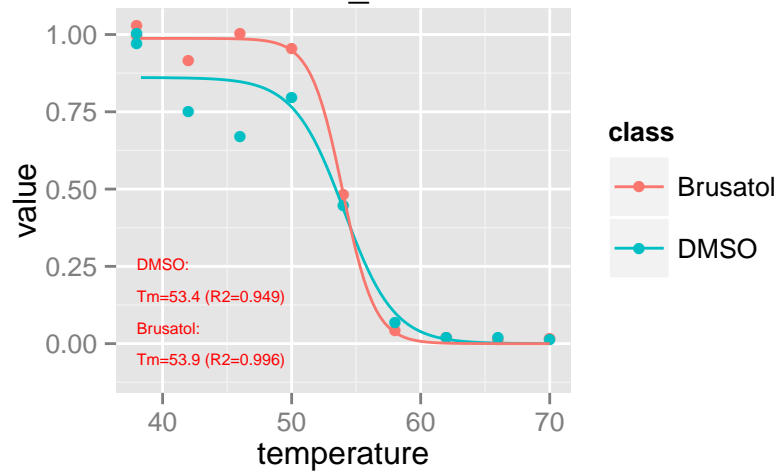

Prot: IF2B\_HUMAN

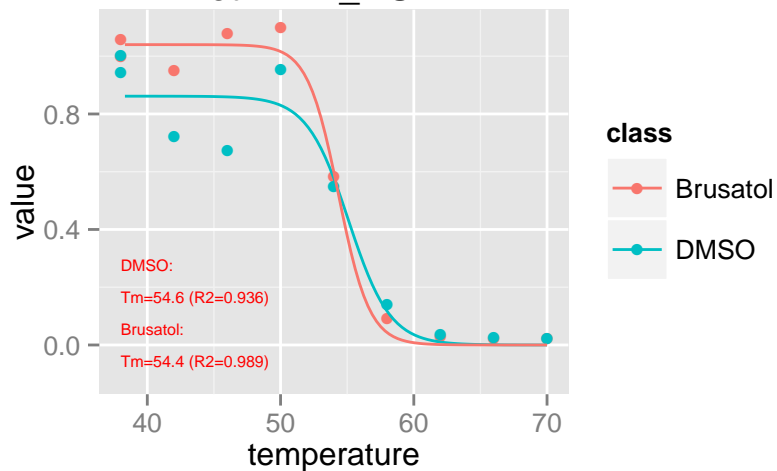

Prot: IF2B1\_HUMAN

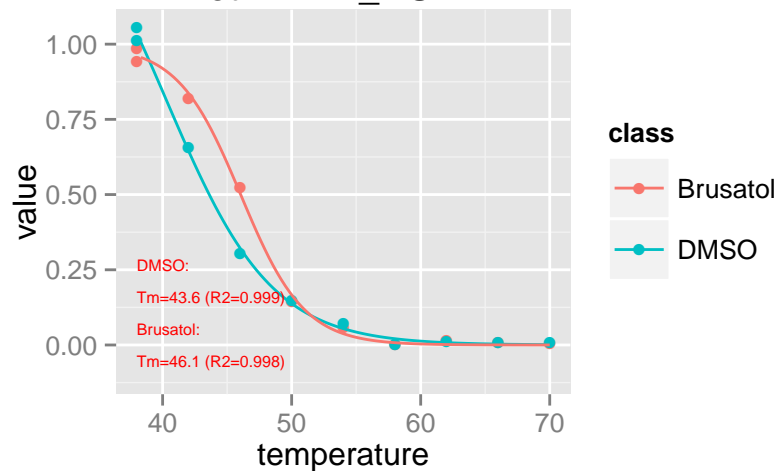

Prot: IF2B3\_HUMAN

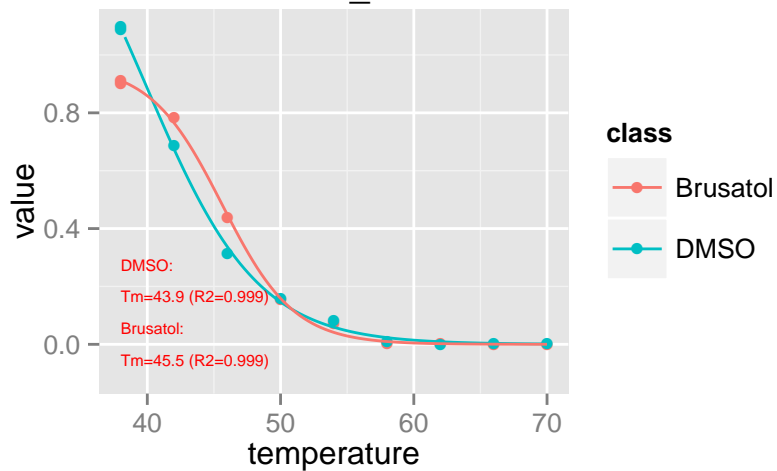

Prot: IF2G\_HUMAN

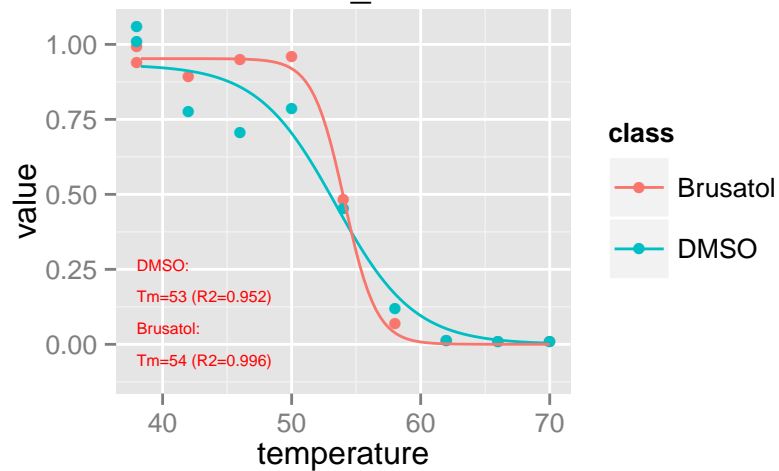

Prot: IF2GL\_HUMAN

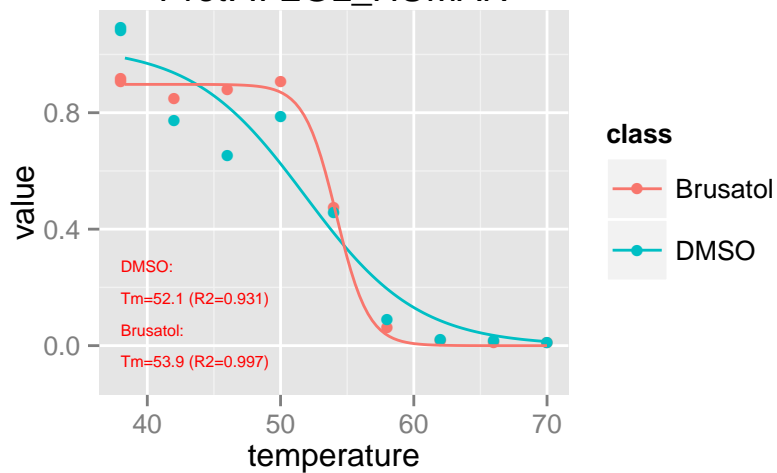

Prot: IF2P\_HUMAN

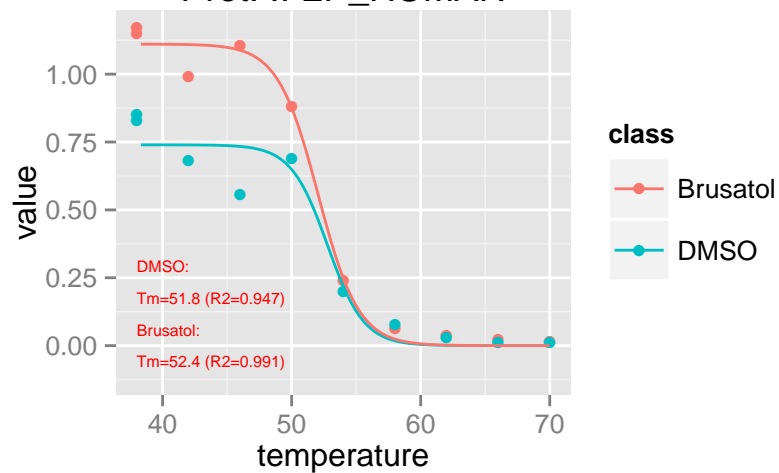

Prot: IF4A1\_HUMAN

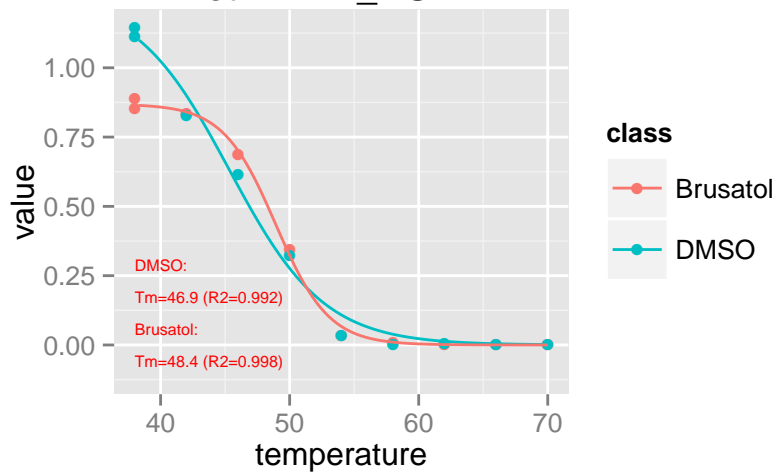

Prot: IF4A2\_HUMAN

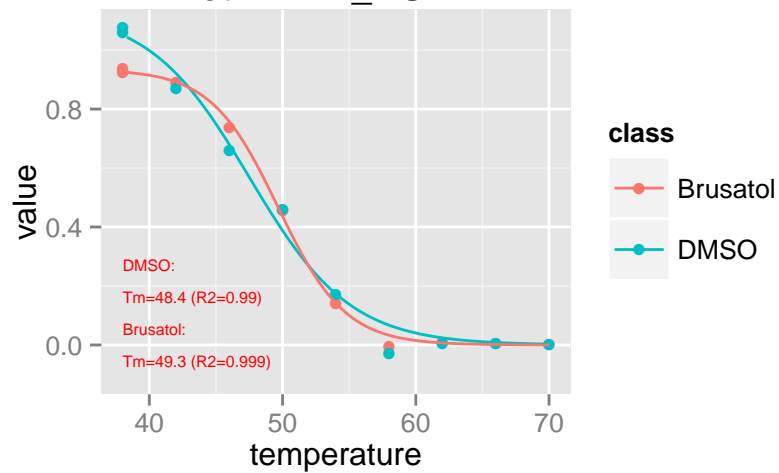

Prot: IF4A3\_HUMAN

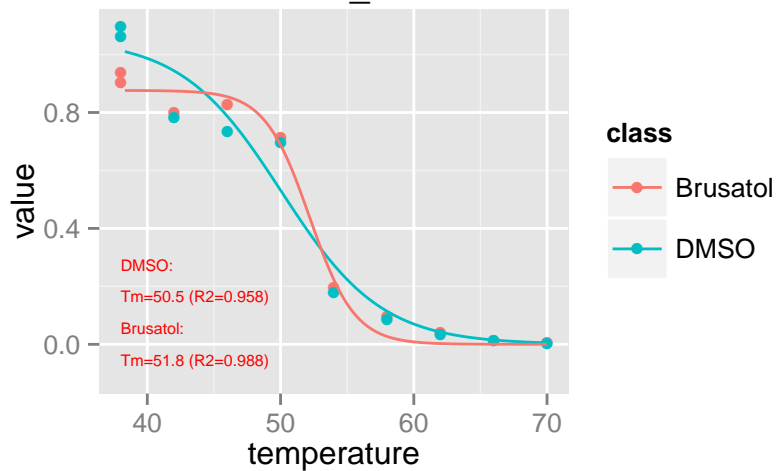

Prot: IF4B\_HUMAN

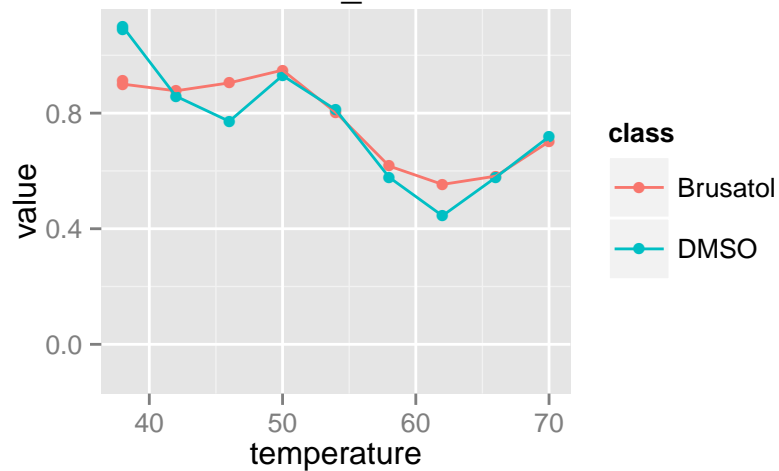

Prot: IF4E2\_HUMAN

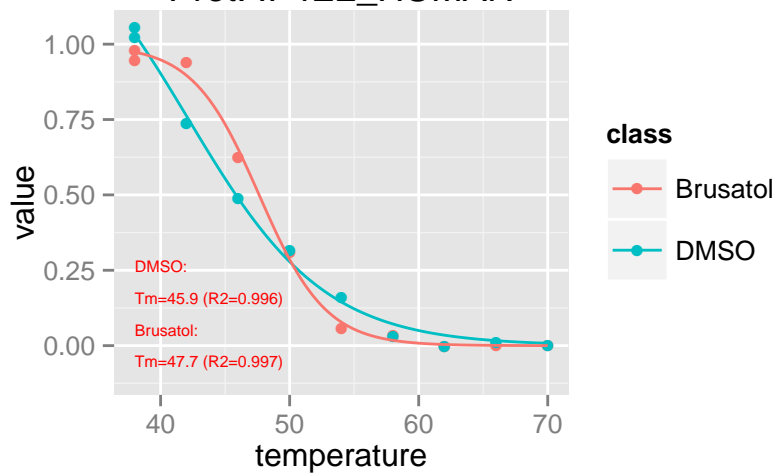

Prot: IF4G1\_HUMAN

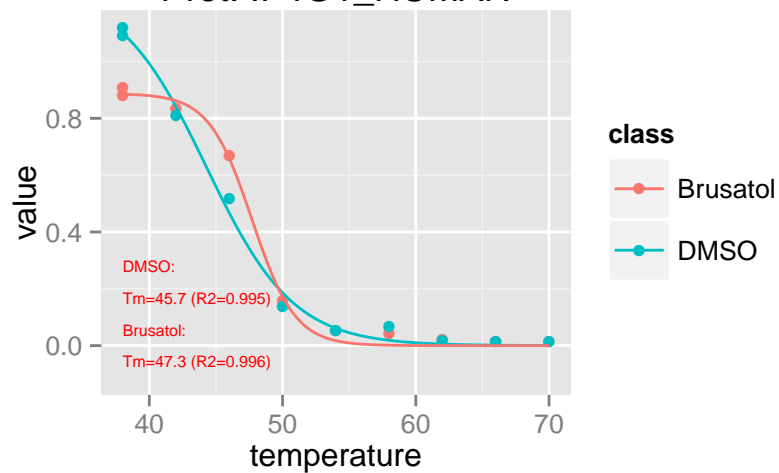

Prot: IF4G2\_HUMAN

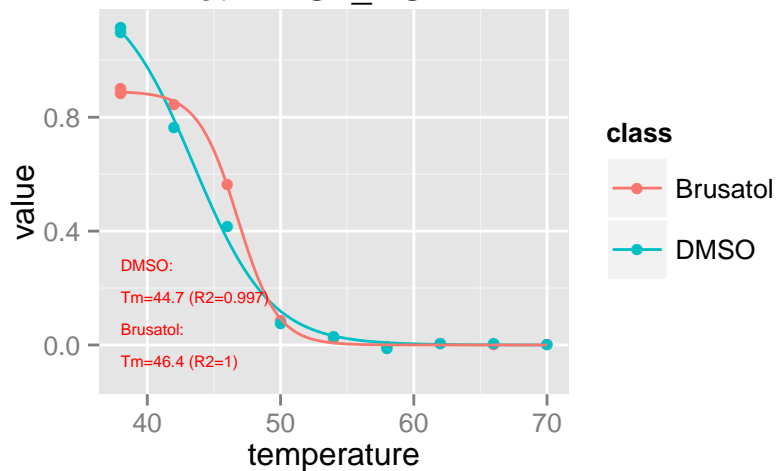

Prot: IF4G3\_HUMAN

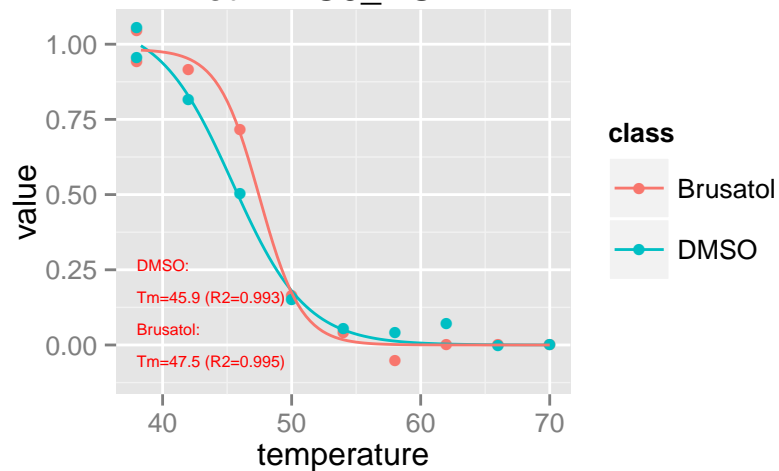

Prot: IF4H\_HUMAN

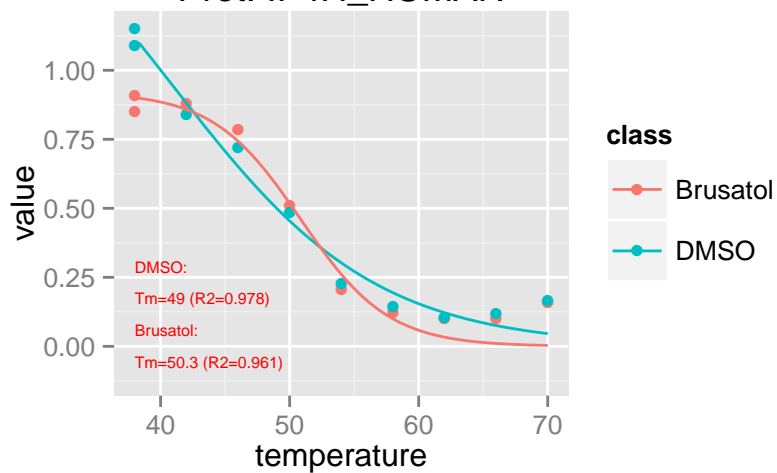

Prot: IF5\_HUMAN

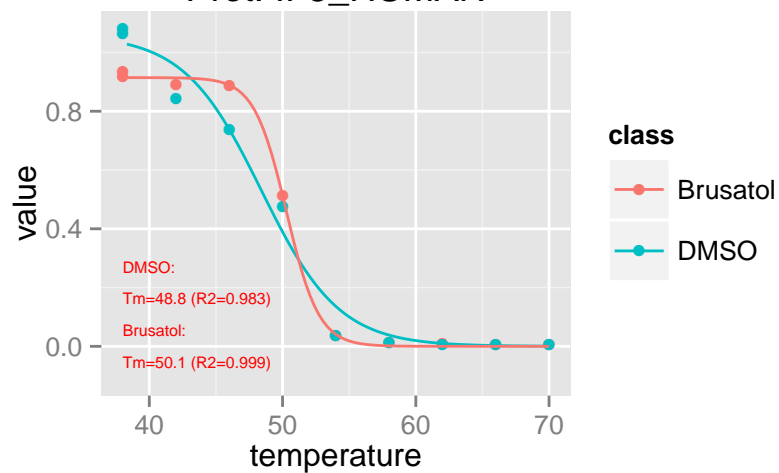

Prot: IF5A1\_HUMAN

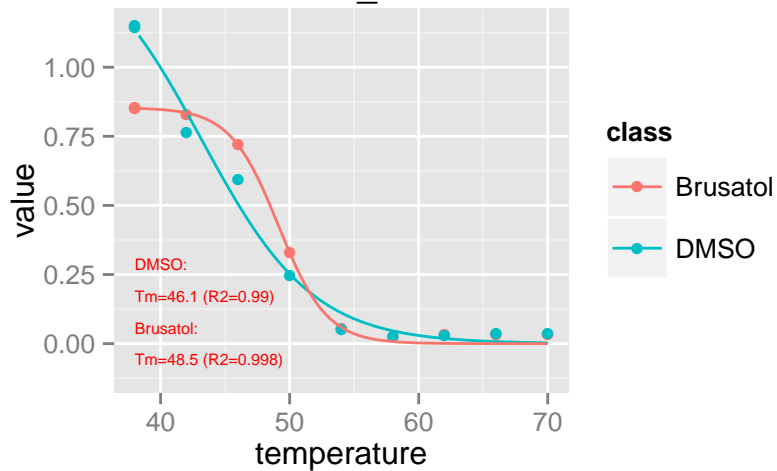

Prot: IF6\_HUMAN

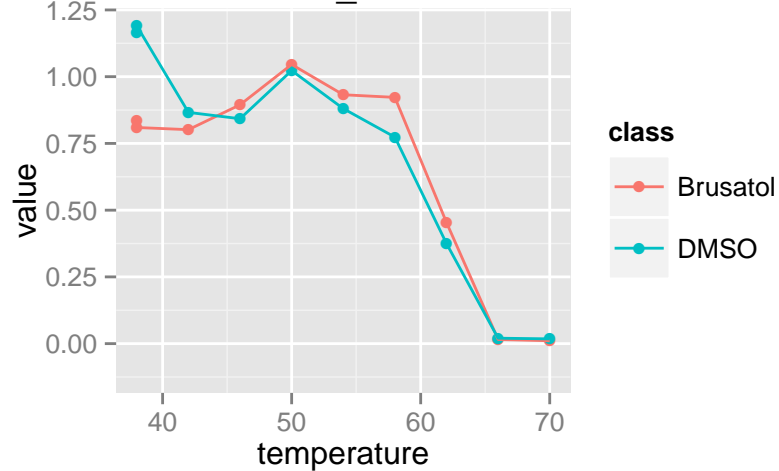

Prot: IFIT5\_HUMAN

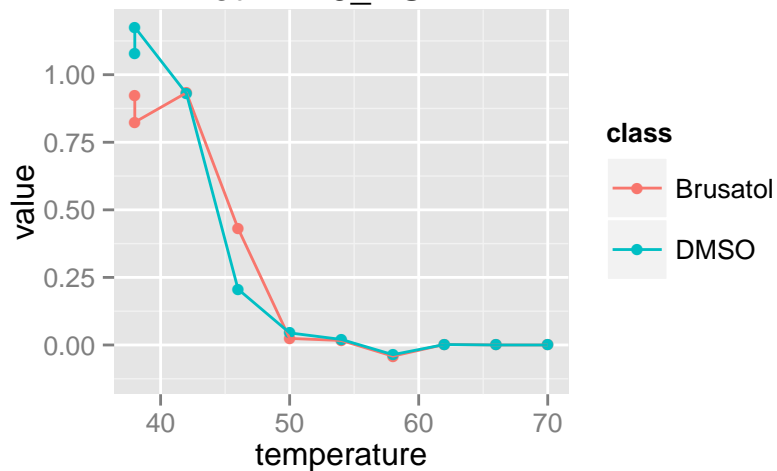

Prot: IFT27\_HUMAN

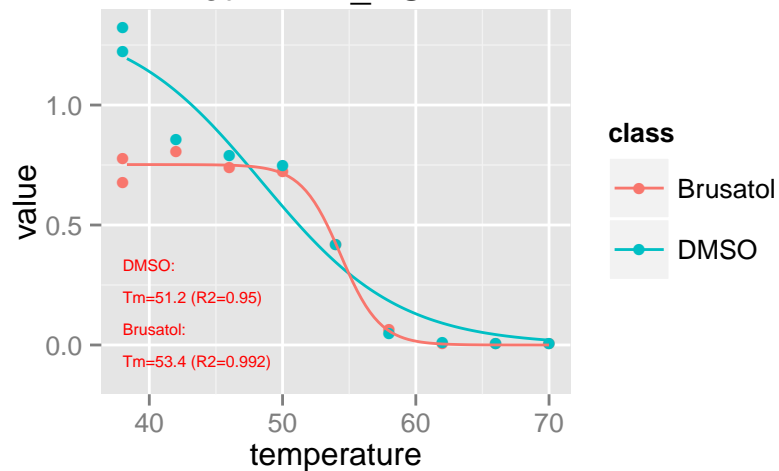

Prot: IFT74\_HUMAN

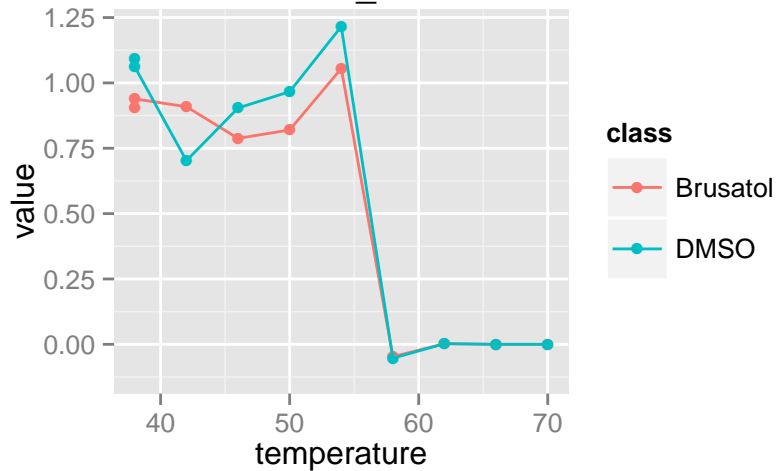

Prot: IGBP1\_HUMAN

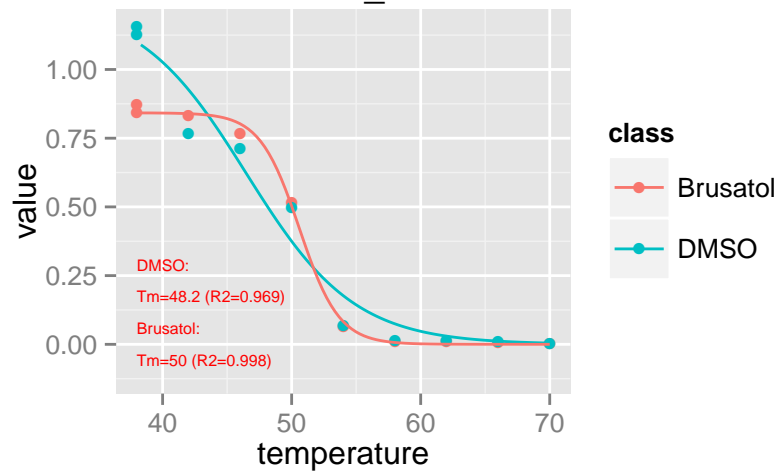

Prot: IKBB\_HUMAN

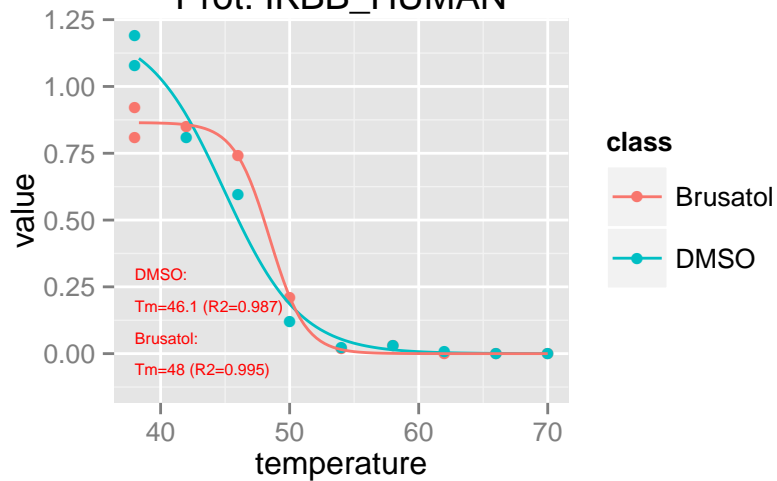

Prot: IKKA\_HUMAN

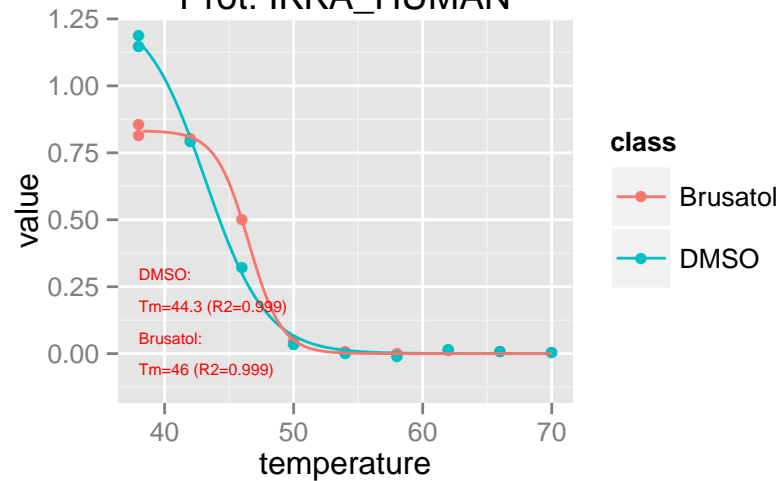

Prot: IKKB\_HUMAN

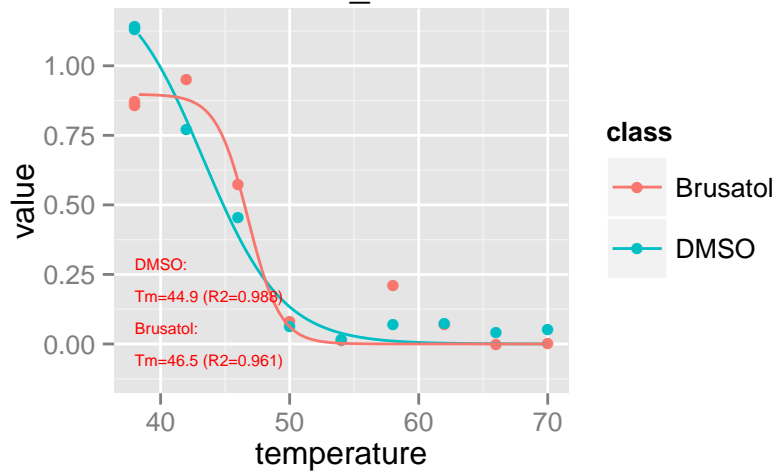

Prot: IL18\_HUMAN

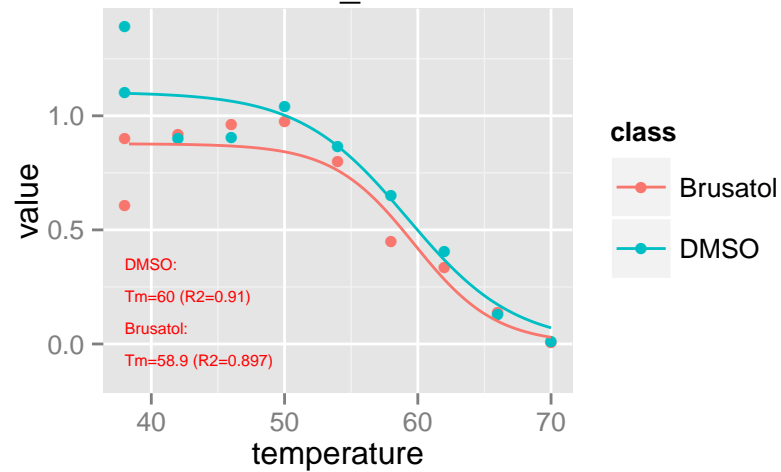

Prot: ILEU\_HUMAN

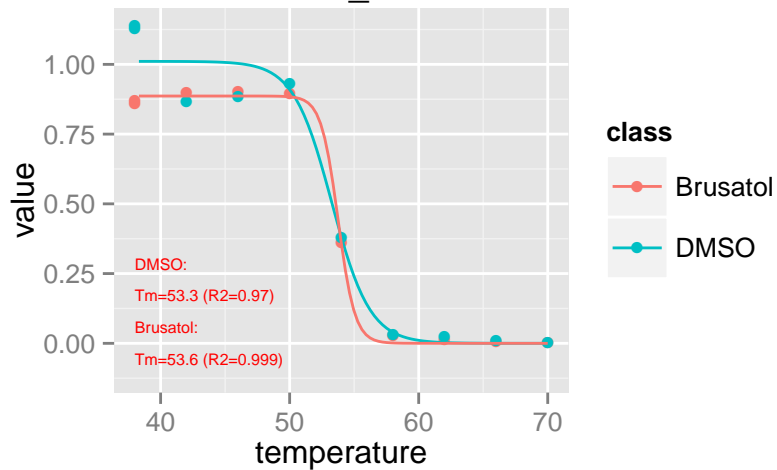

Prot: ILF2\_HUMAN

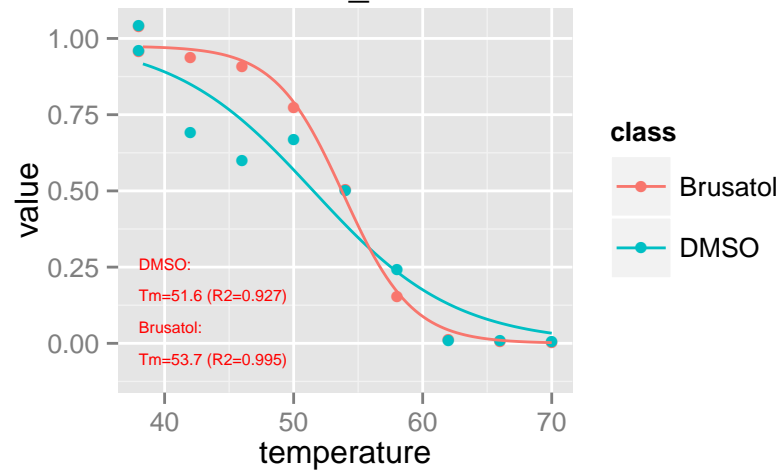

Prot: ILF3\_HUMAN

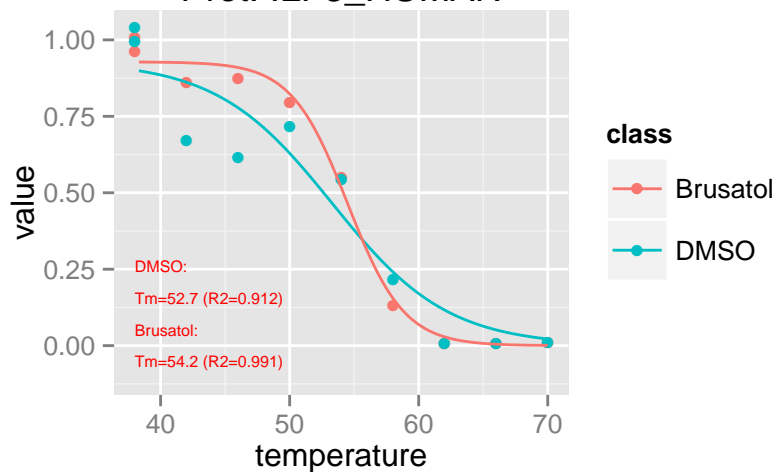

Prot: ILK\_HUMAN

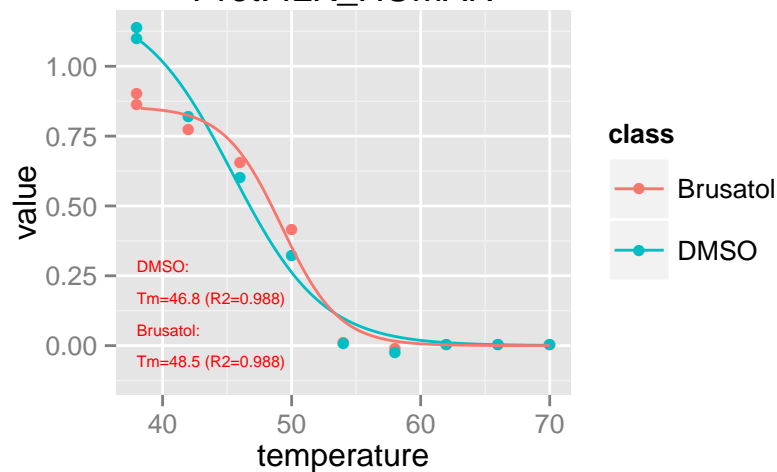

Prot: ILKAP\_HUMAN

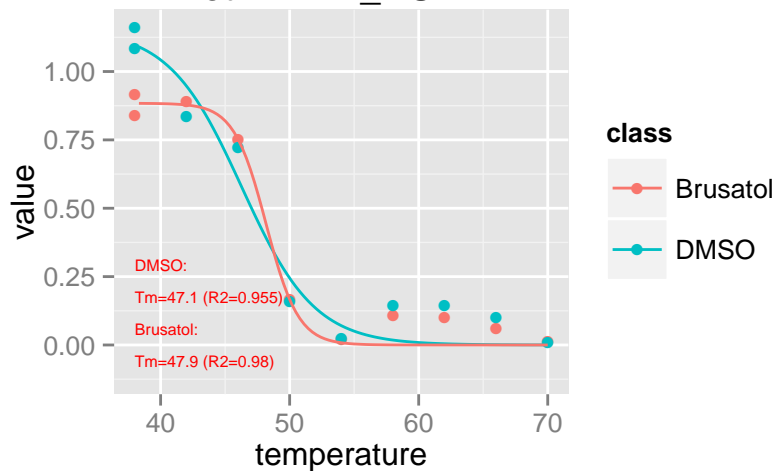

Prot: IMA1\_HUMAN

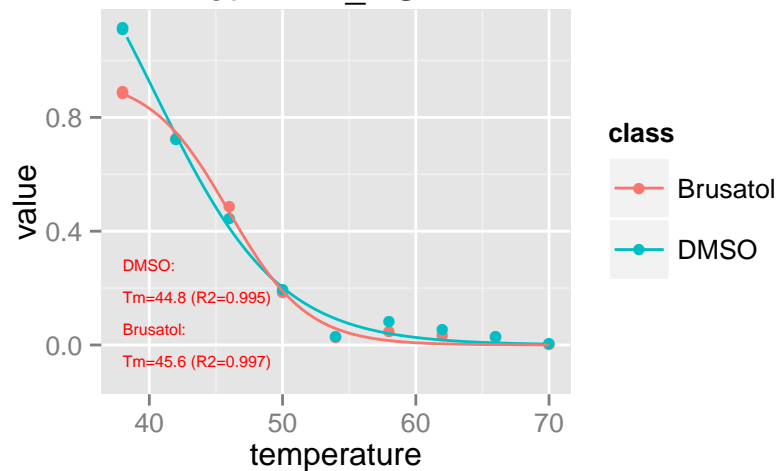

Prot: IMA2\_HUMAN

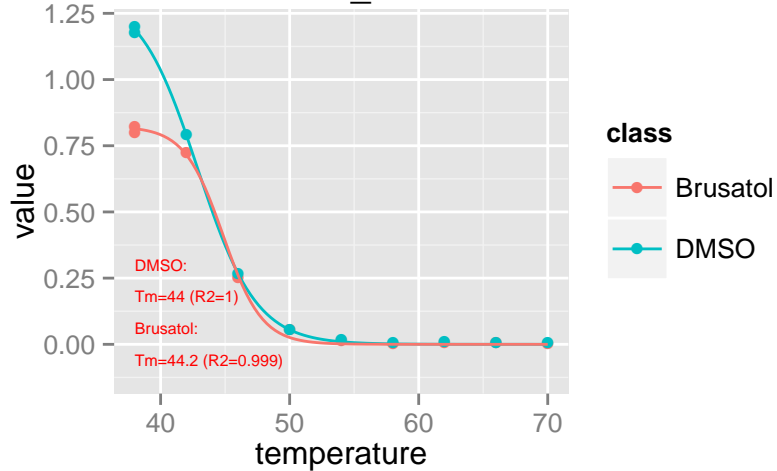

Prot: IMA3\_HUMAN

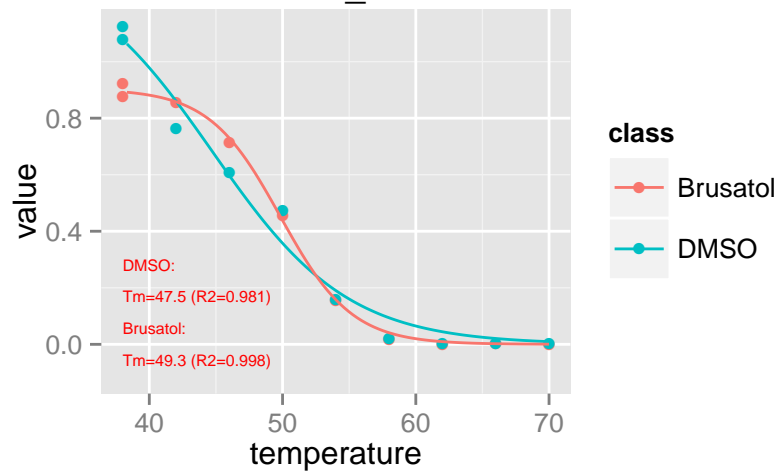

Prot: IMA4\_HUMAN

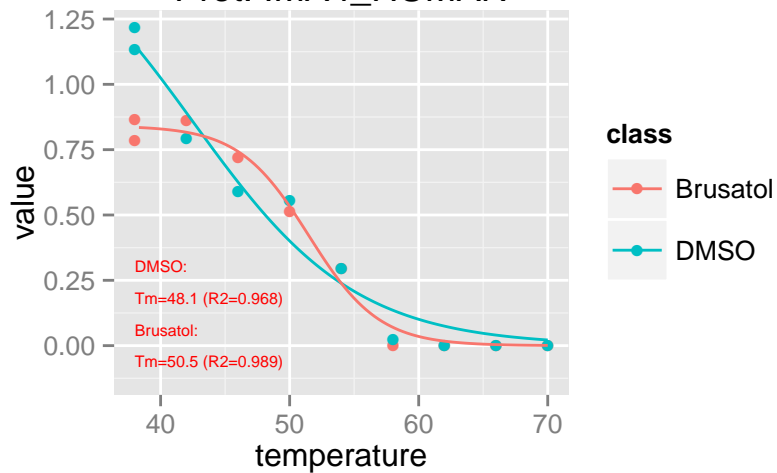

Prot: IMA5\_HUMAN

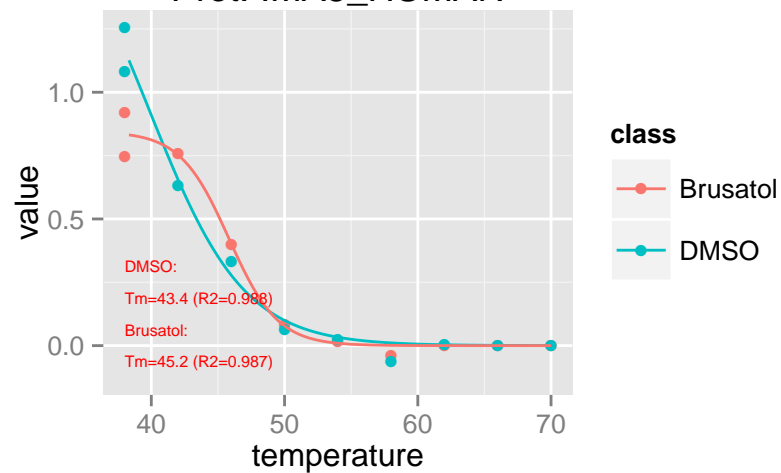

Prot: IMA7\_HUMAN

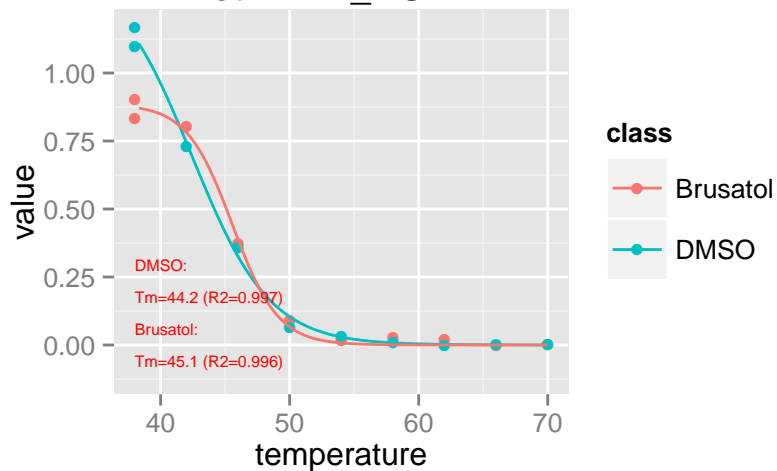

Prot: IMB1\_HUMAN

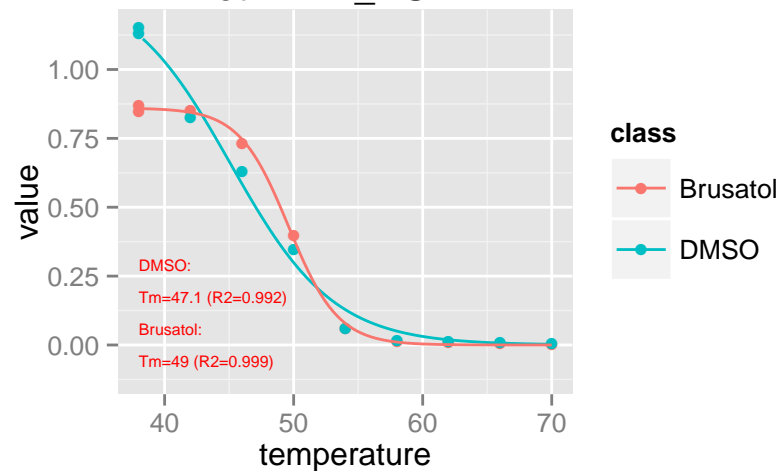

Prot: IMDH1\_HUMAN

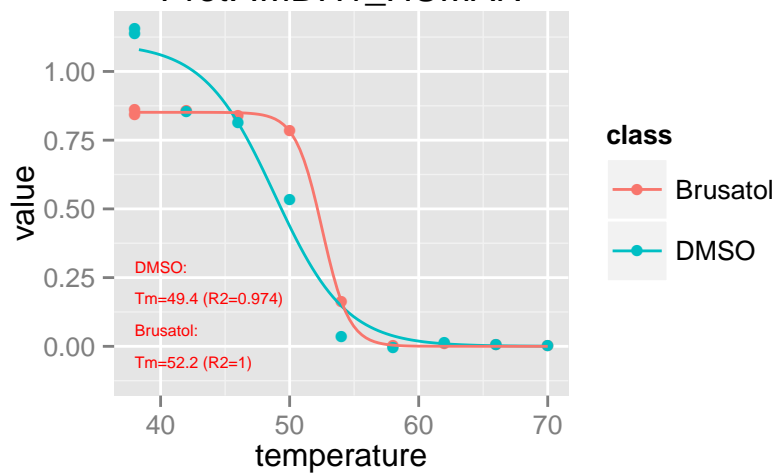

Prot: IMDH2\_HUMAN

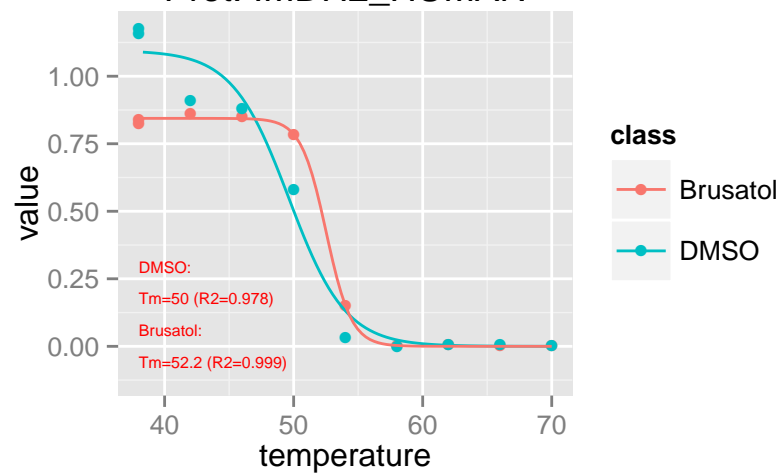

Prot: IMPA1\_HUMAN

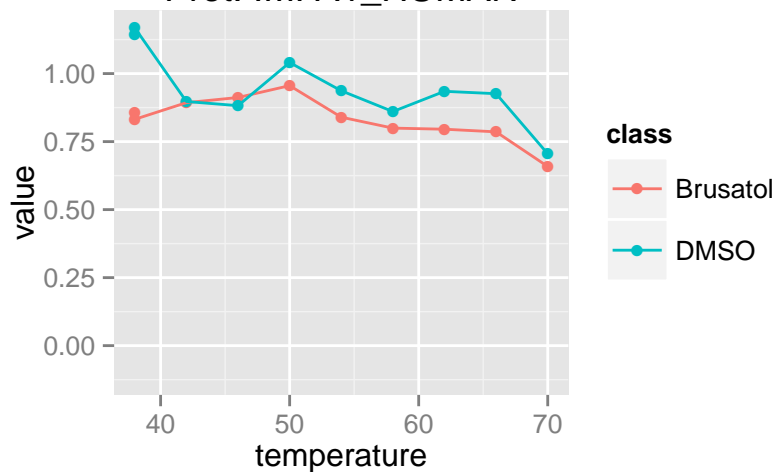

Prot: IMPA2\_HUMAN

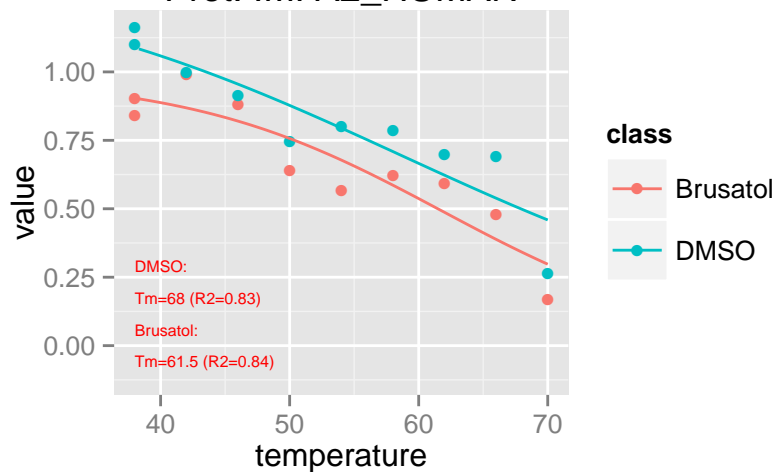

Prot: IMUP\_HUMAN

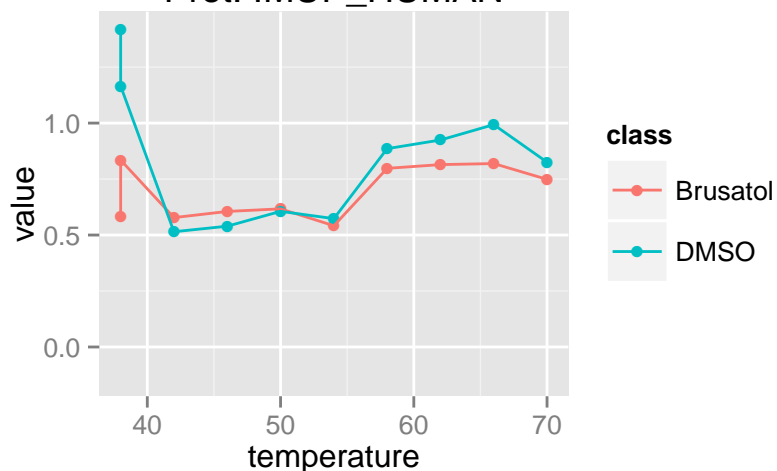

Prot: IN35\_HUMAN

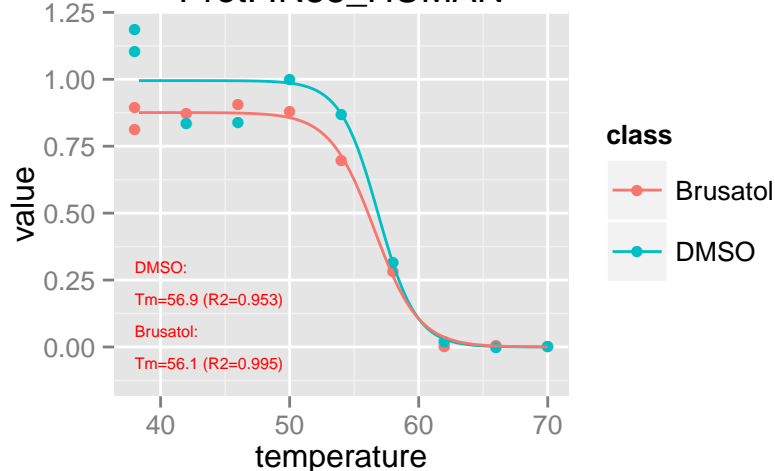

Prot: INF2\_HUMAN

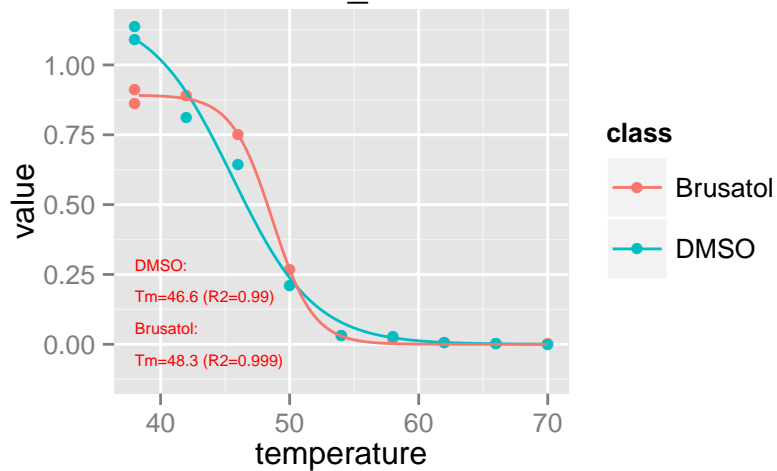

Prot: INO1\_HUMAN

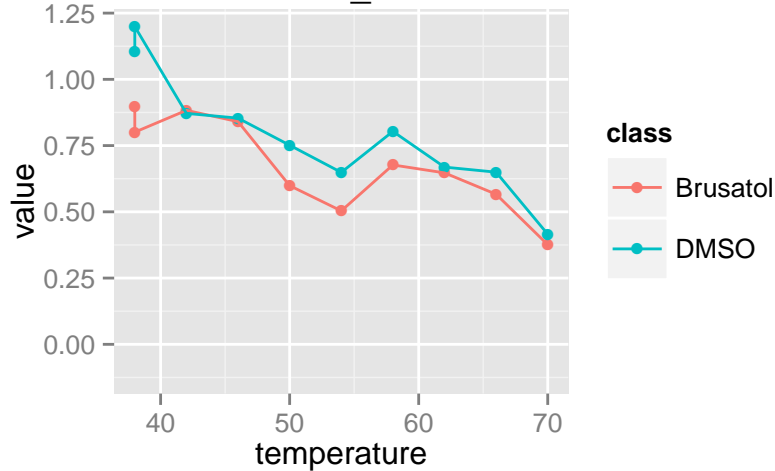



Prot: INP4B\_HUMAN

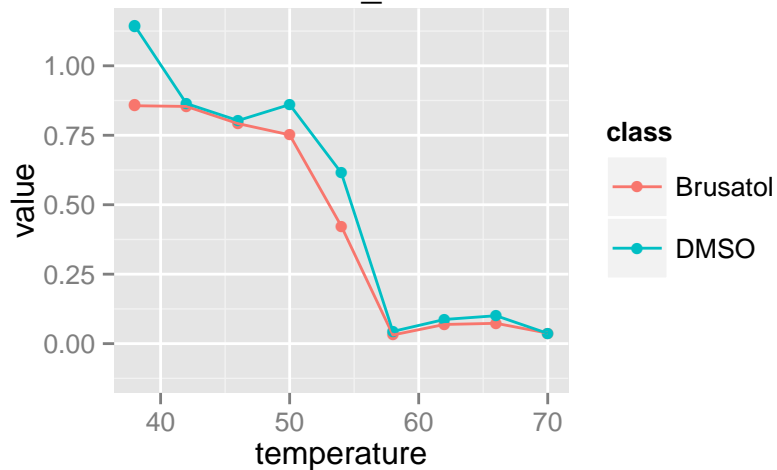

Prot: INPP\_HUMAN

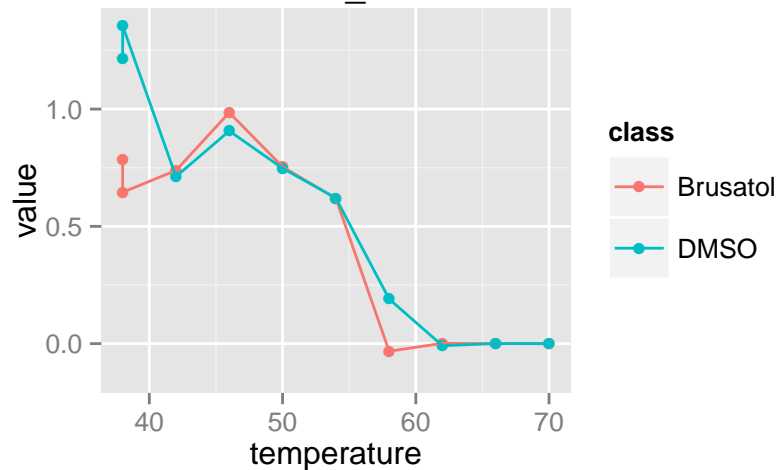

Prot: INT1\_HUMAN

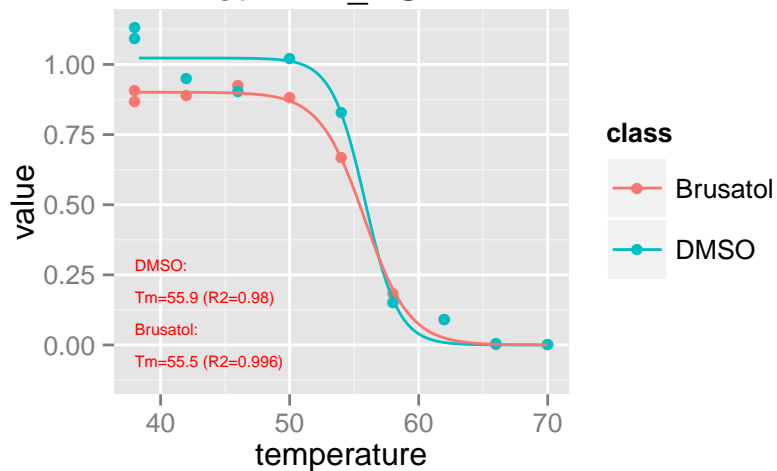

Prot: INT11\_HUMAN

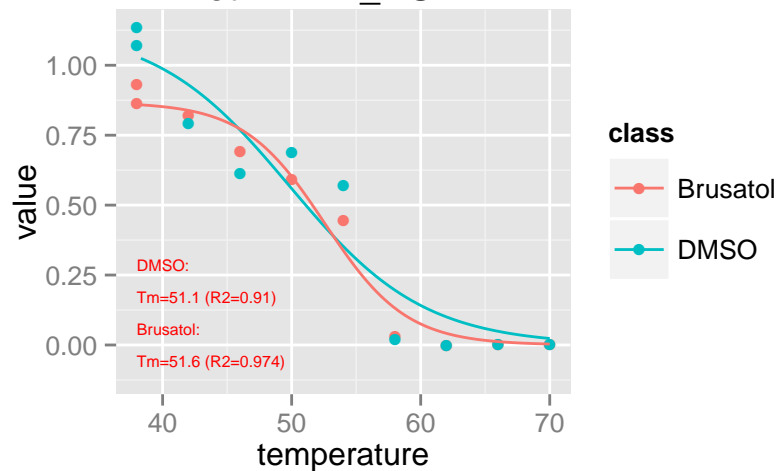

Prot: INT3\_HUMAN

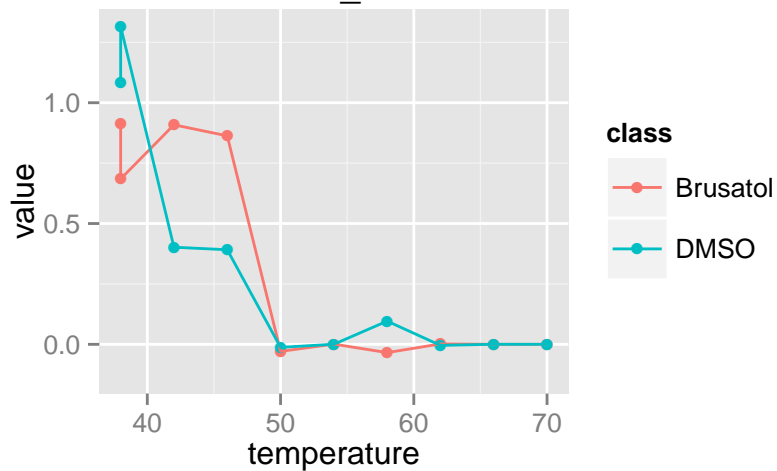

Prot: INT9\_HUMAN

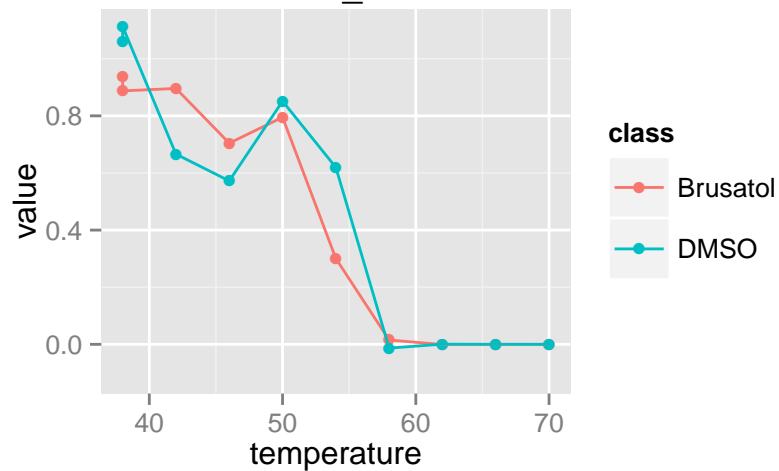

Prot: IPO11\_HUMAN

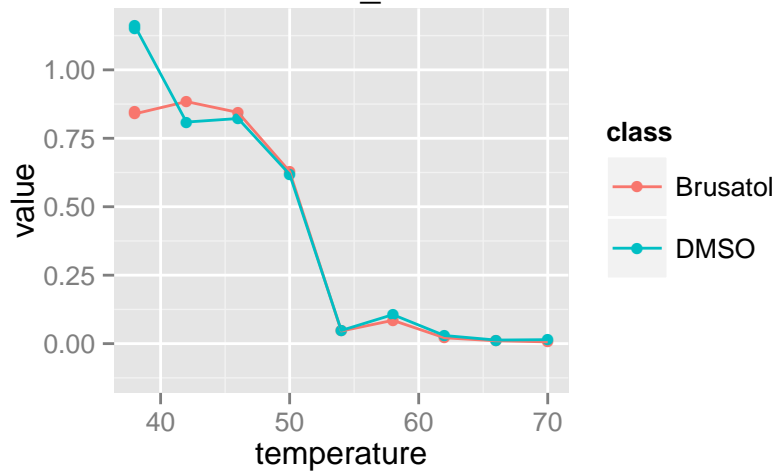

Prot: IPO4\_HUMAN

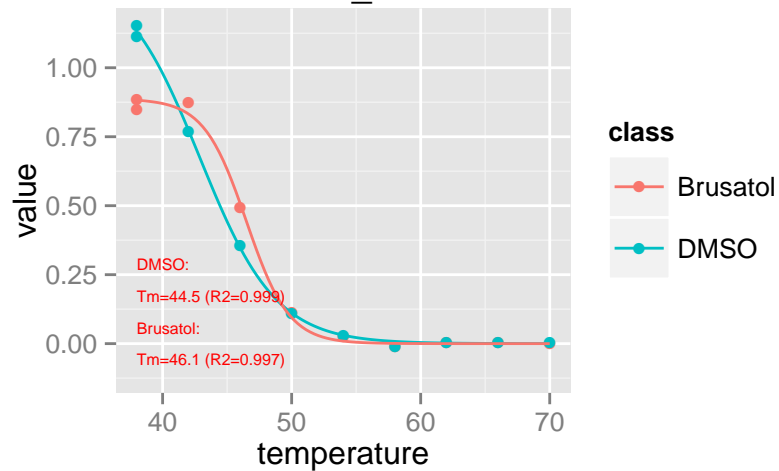

Prot: IPO5\_HUMAN

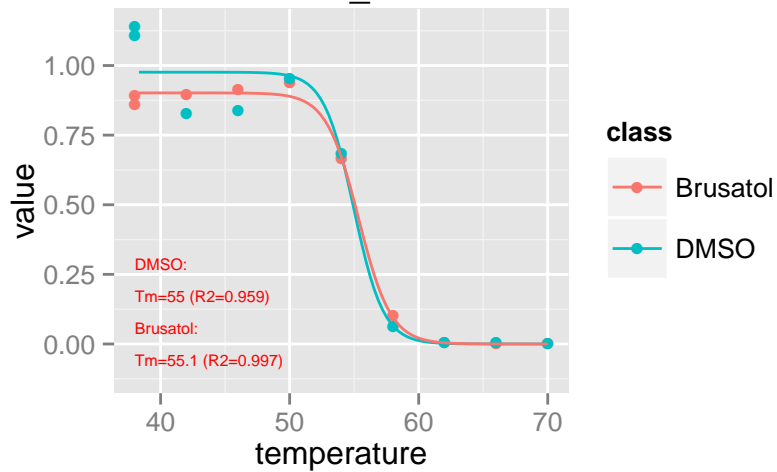

Prot: IPO7\_HUMAN

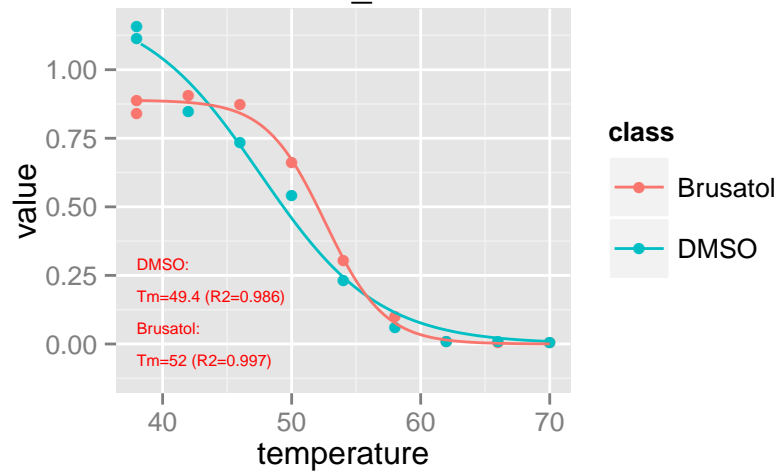

Prot: IPO8\_HUMAN

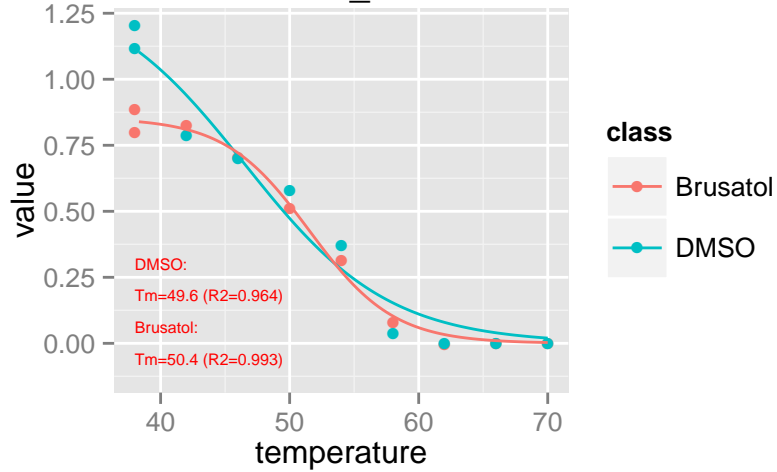

Prot: IPO9\_HUMAN

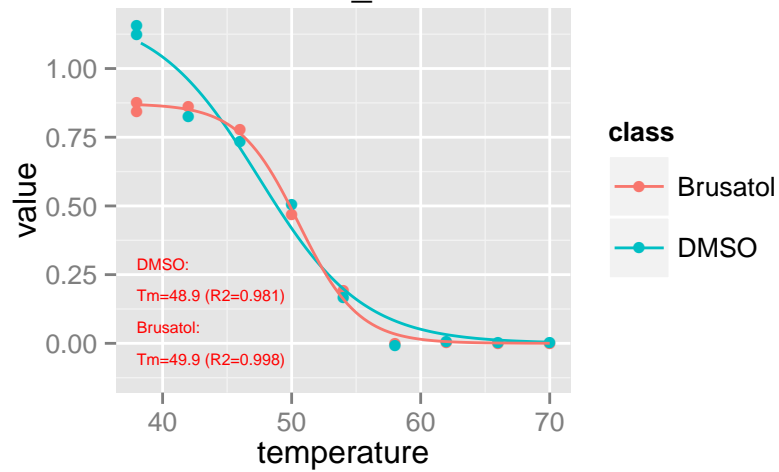

Prot: IPP2\_HUMAN

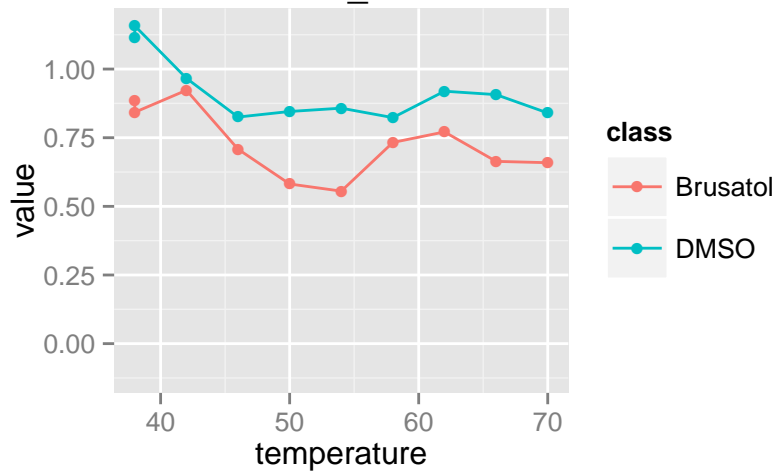

Prot: IPP2M\_HUMAN

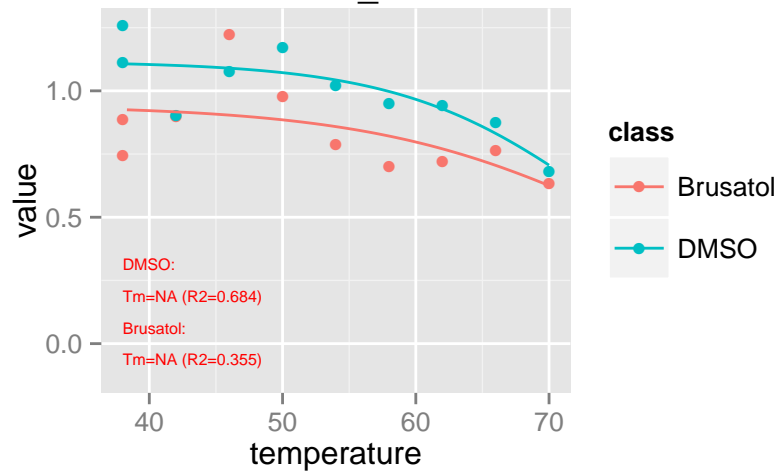

Prot: IPYR\_HUMAN

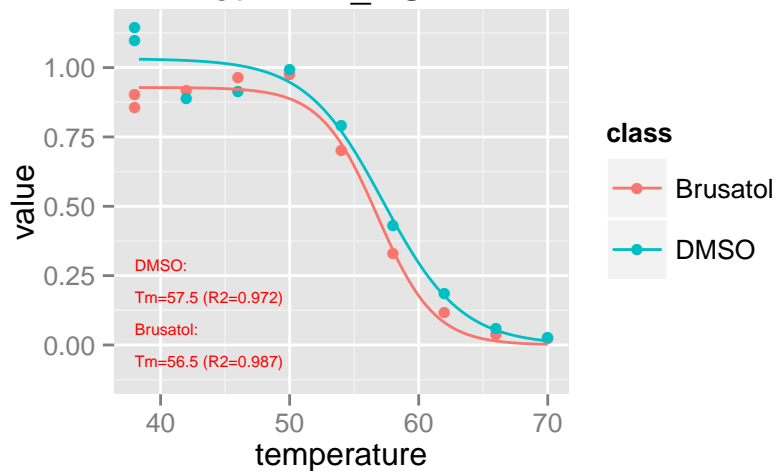

Prot: IPYR2\_HUMAN

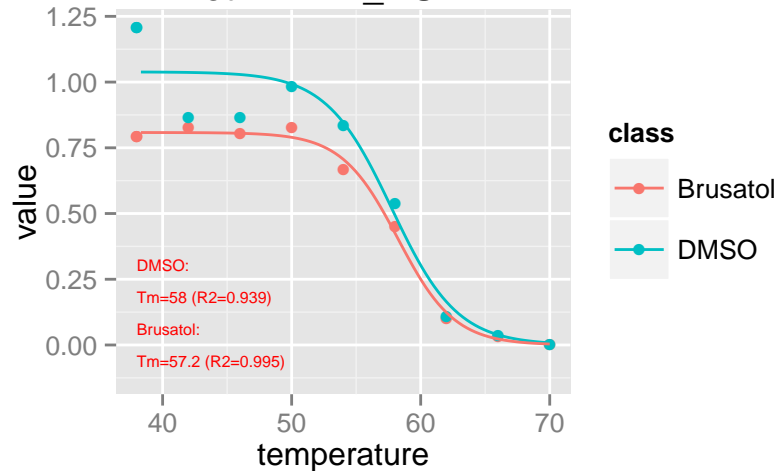

Prot: IQGA1\_HUMAN

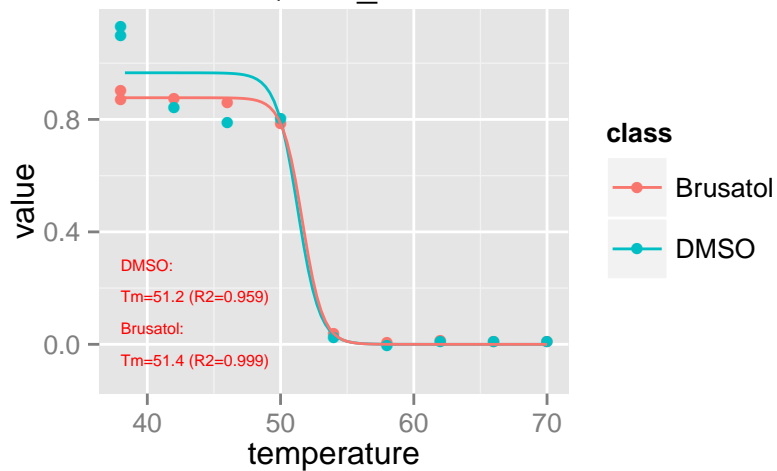

Prot: IREB2\_HUMAN

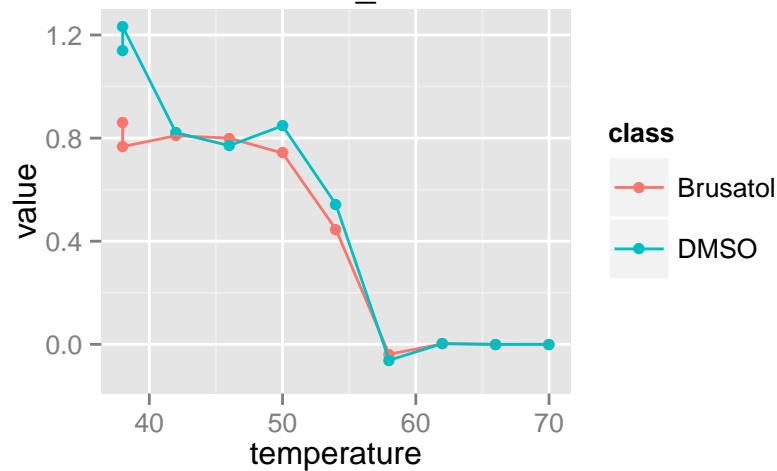

Prot: IRF3\_HUMAN

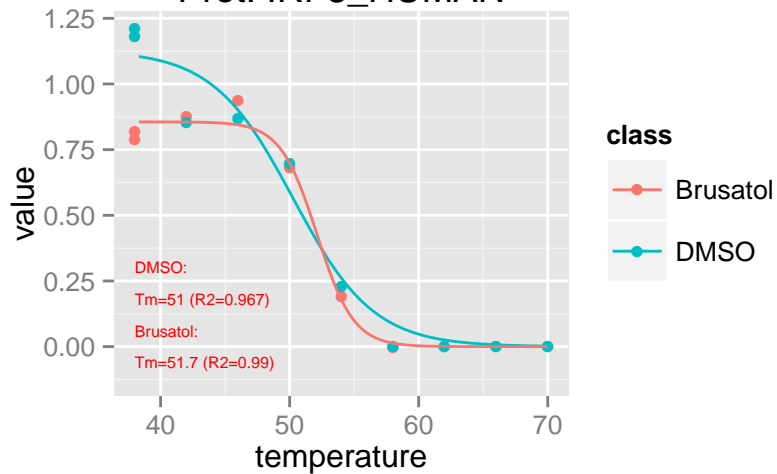

Prot: IRGQ\_HUMAN

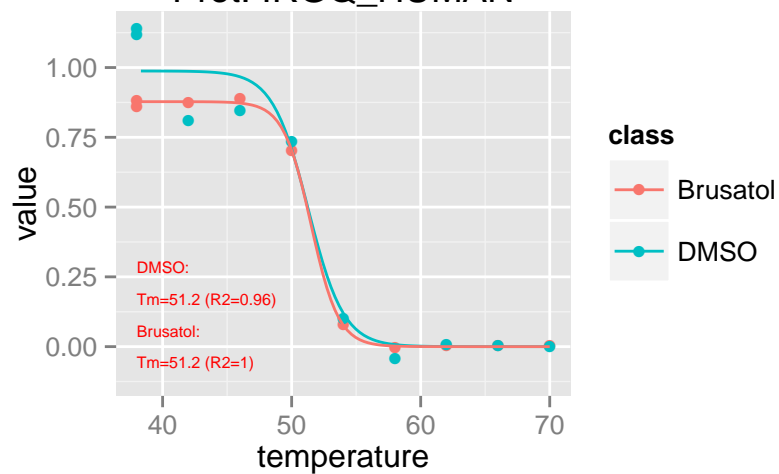

Prot: IRS1\_HUMAN

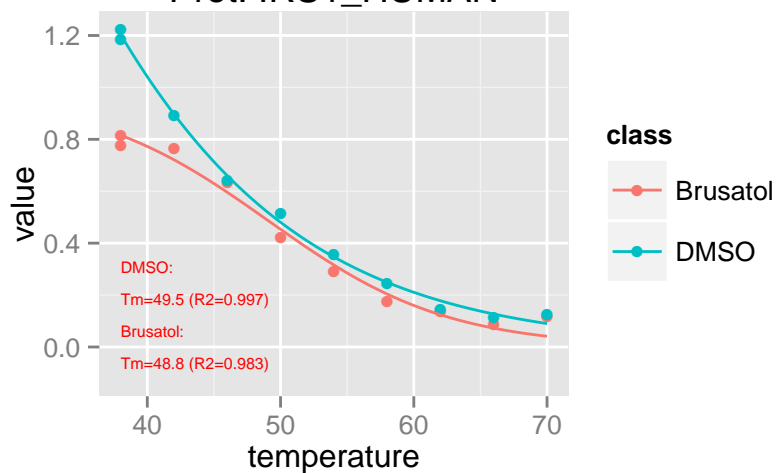

Prot: IRS2\_HUMAN

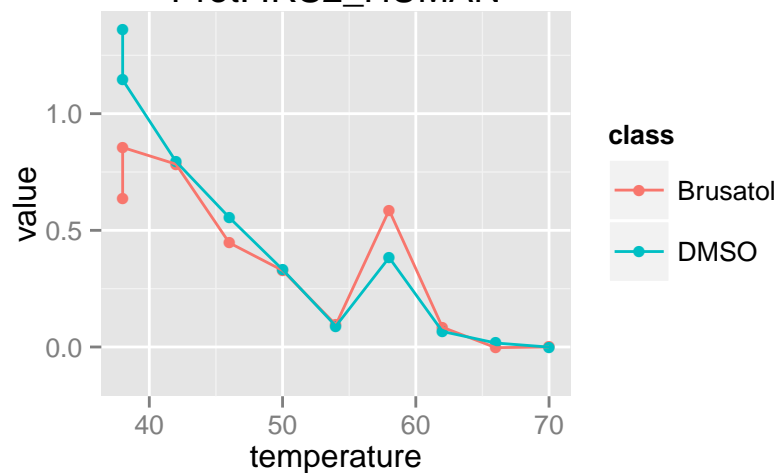

Prot: ISCA1\_HUMAN

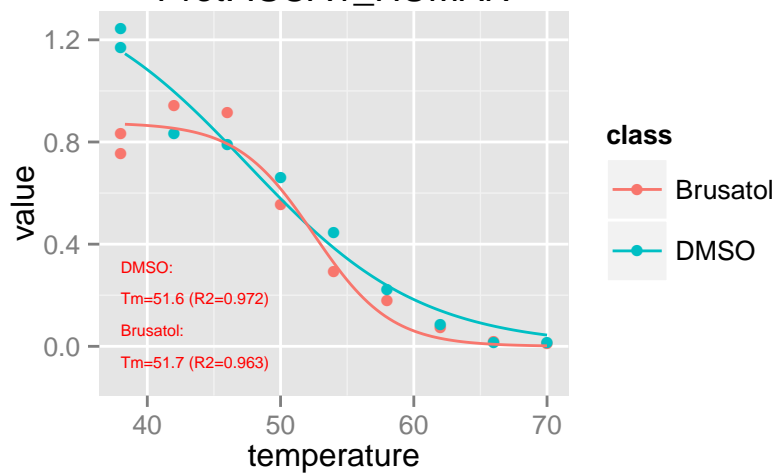

Prot: ISCA2\_HUMAN

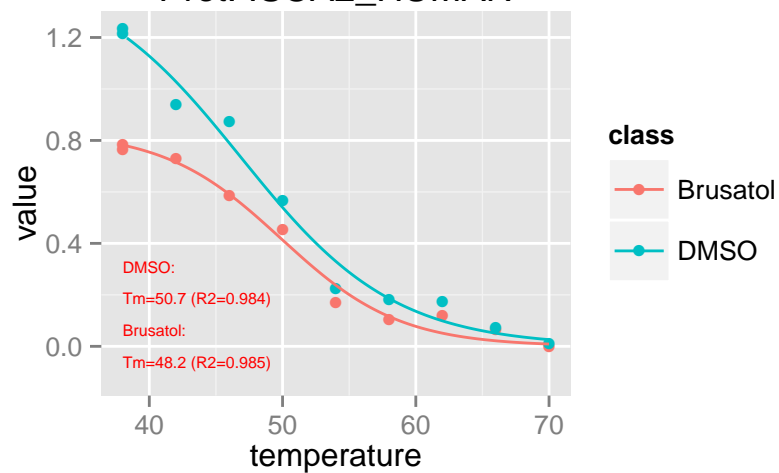

Prot: ISCU\_HUMAN

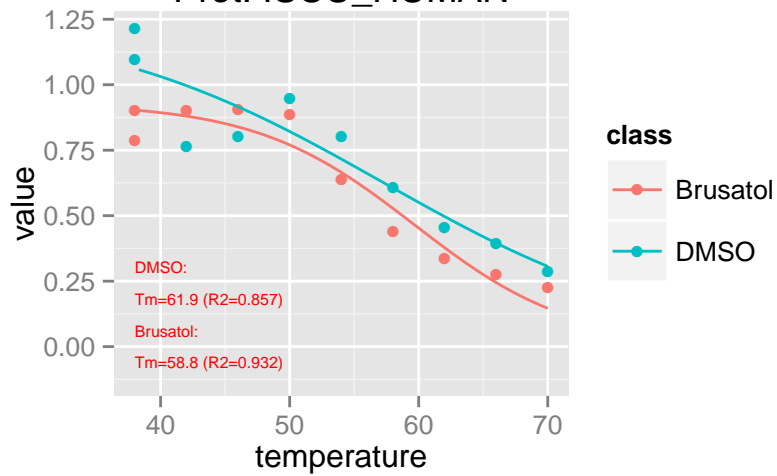

Prot: ISOC1\_HUMAN

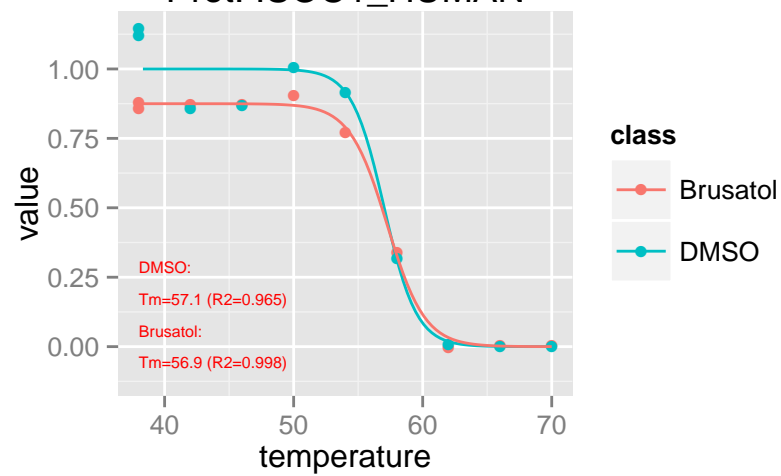

Prot: ISOC2\_HUMAN

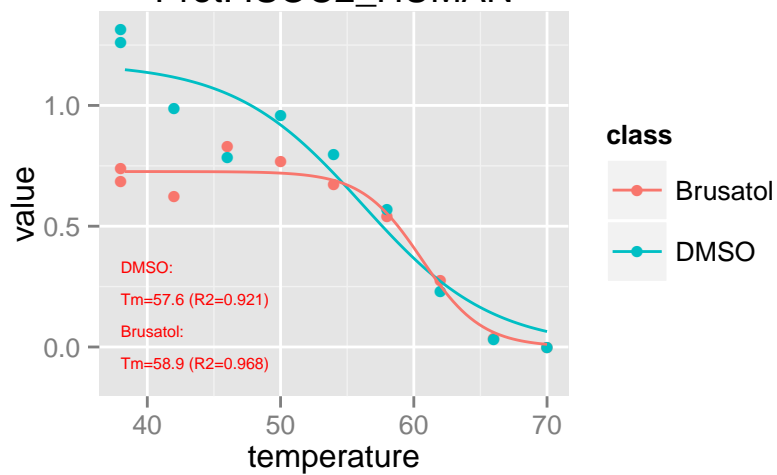

Prot: IST1\_HUMAN

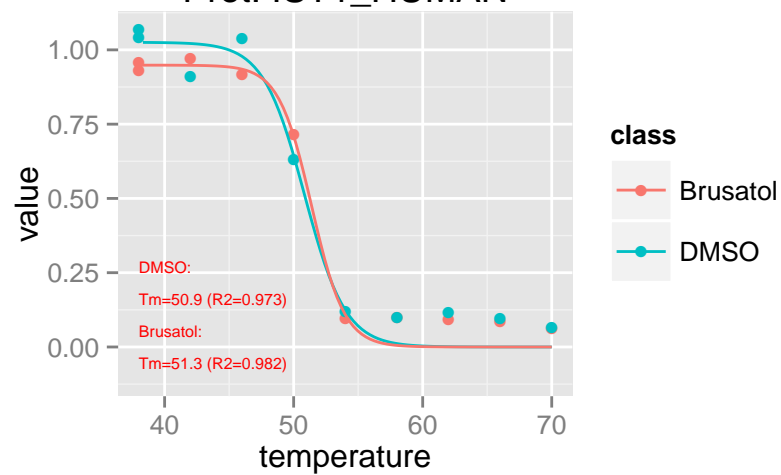

Prot: ISY1\_HUMAN

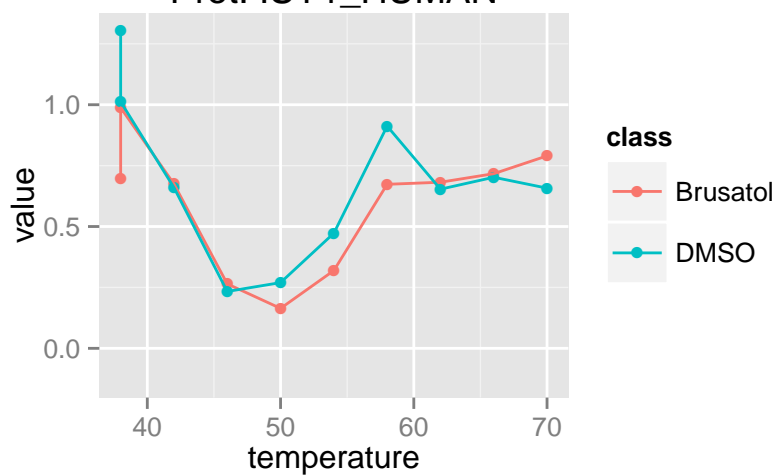

Prot: ITA3\_HUMAN

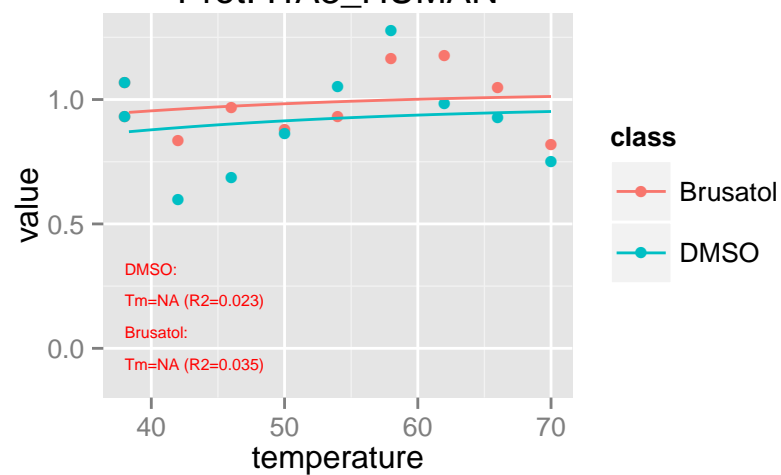

Prot: ITA6\_HUMAN

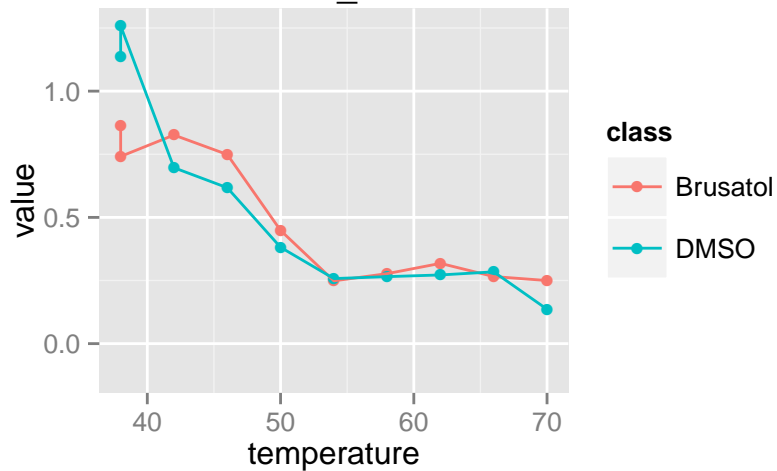

Prot: ITAV\_HUMAN

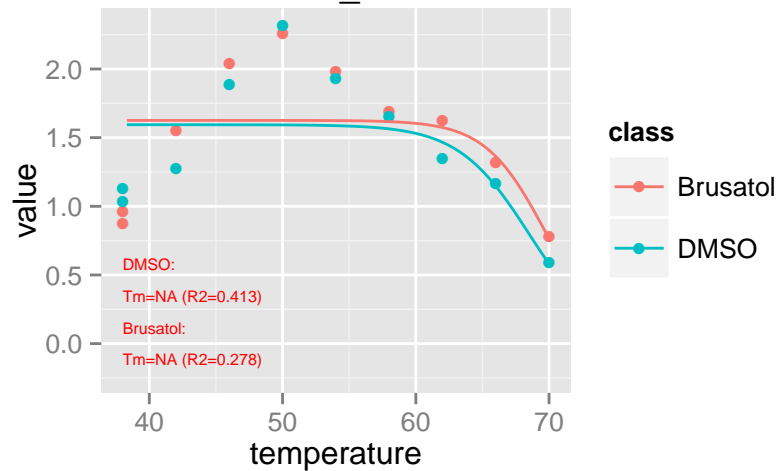

Prot: ITB1\_HUMAN

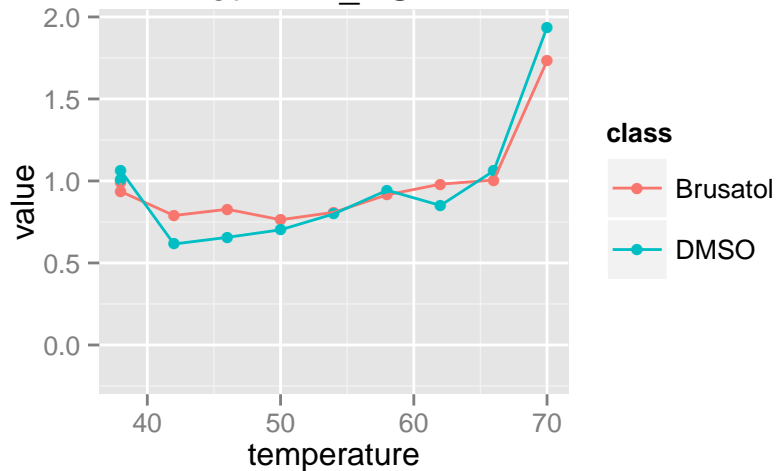

Prot: ITB4\_HUMAN

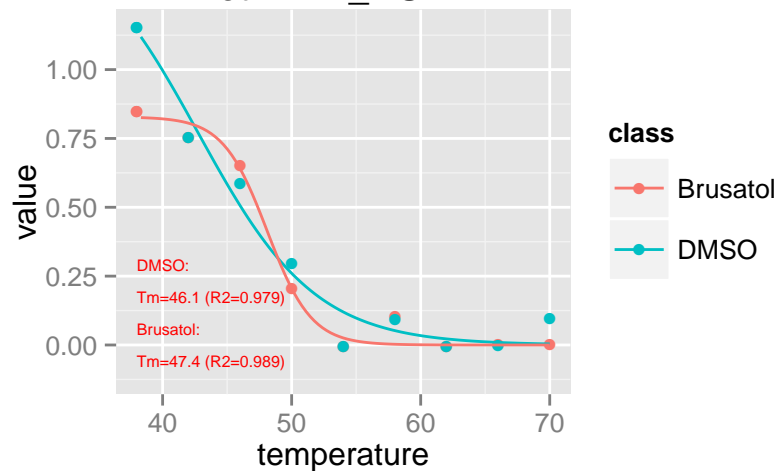

Prot: ITPA\_HUMAN

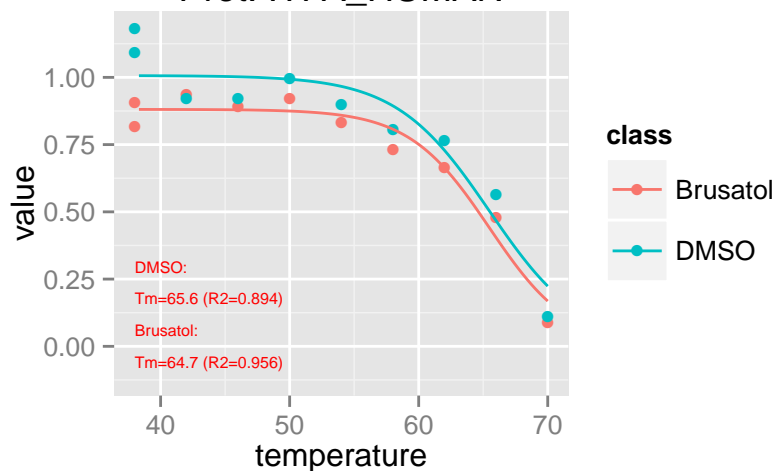

Prot: ITPK1\_HUMAN

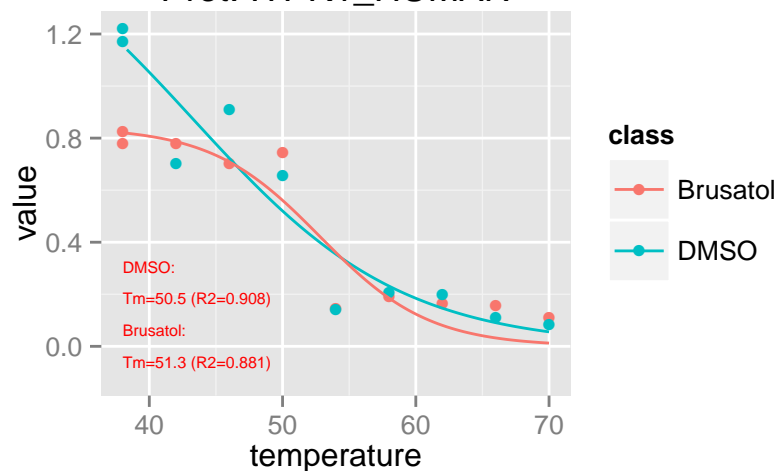

Prot: ITSN2\_HUMAN

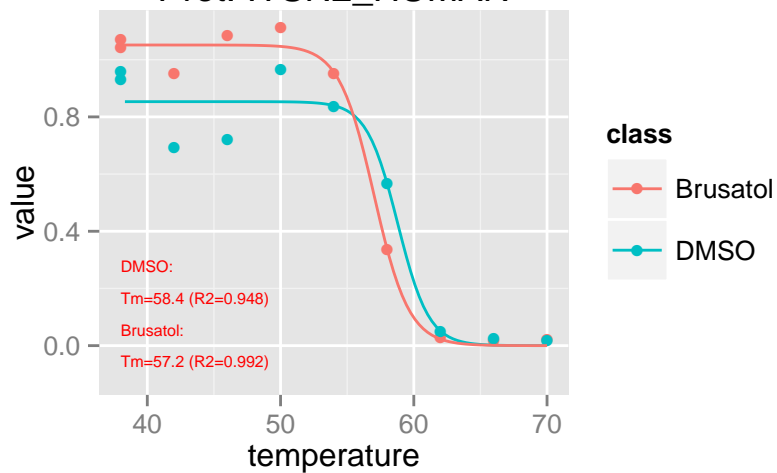

Prot: IVD\_HUMAN

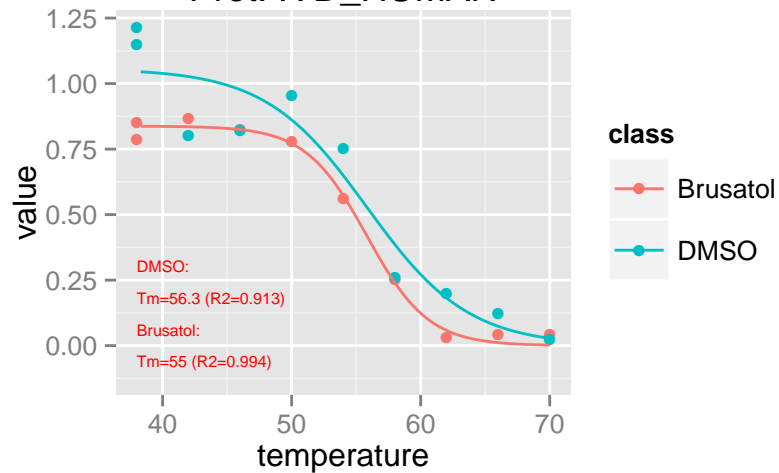

Prot: IWS1\_HUMAN

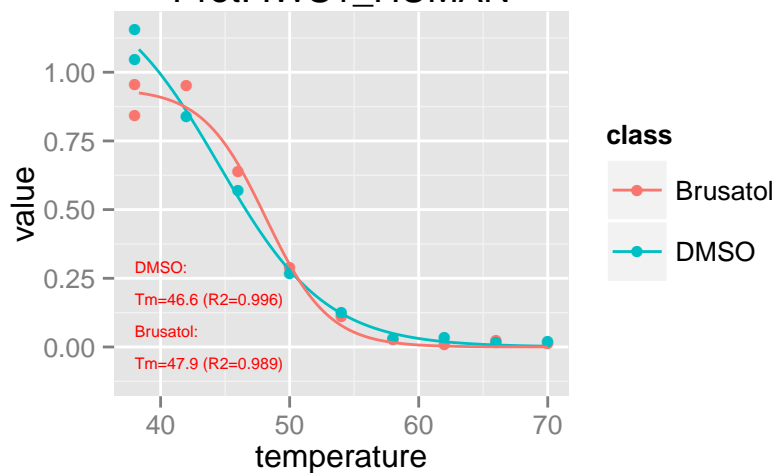

Prot: JAG1\_HUMAN

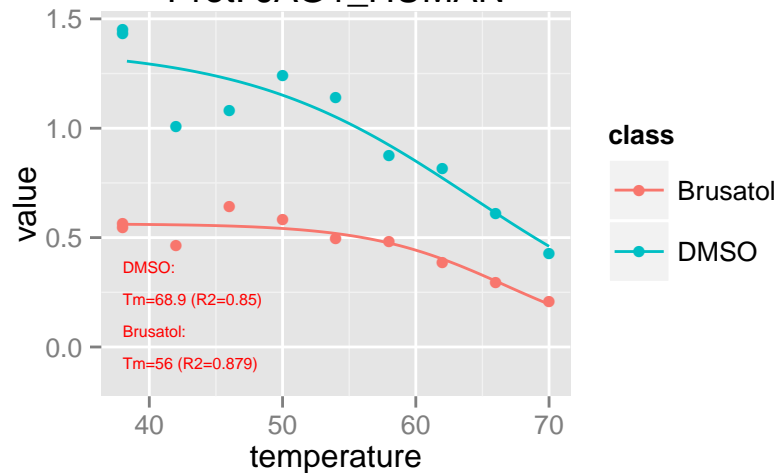

Prot: JAM1\_HUMAN

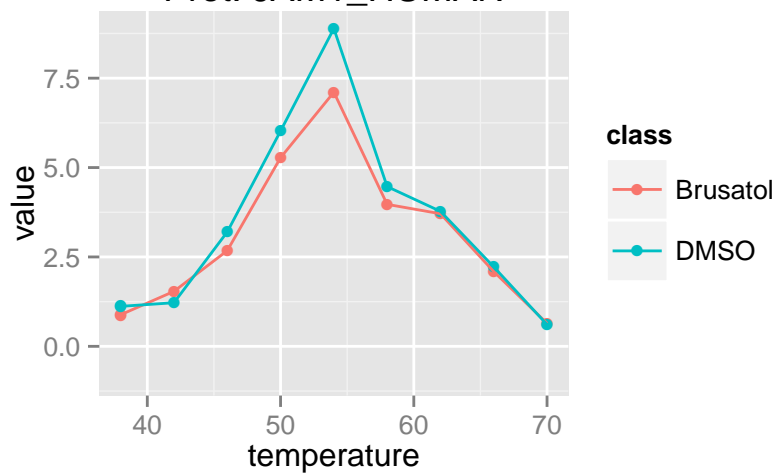

Prot: JIP3\_HUMAN

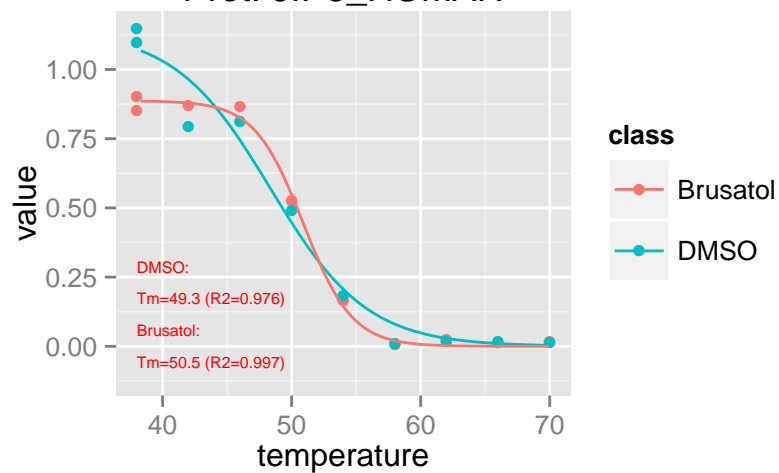

Prot: JIP4\_HUMAN

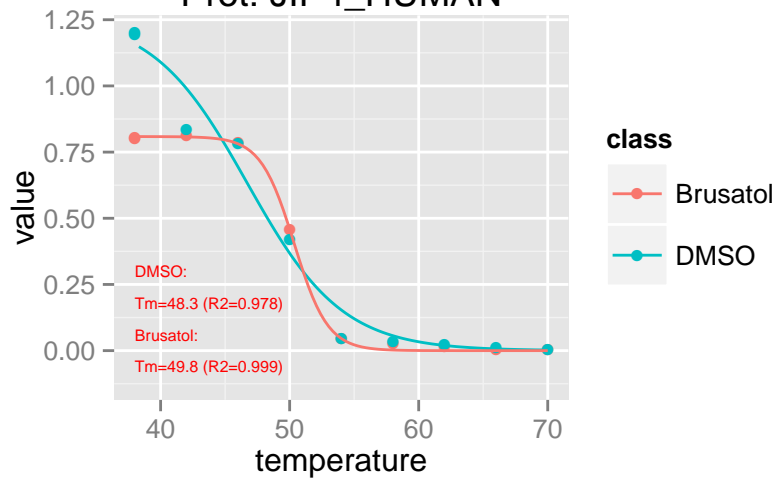

Prot: JMJD6\_HUMAN

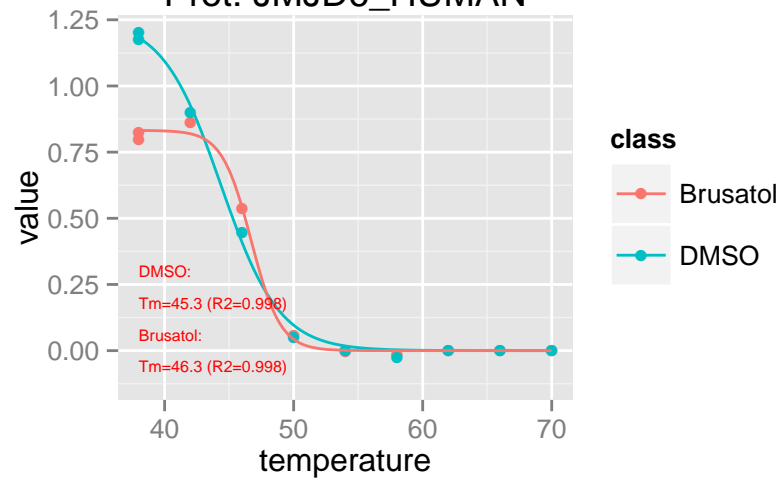

Prot: JUNB\_HUMAN

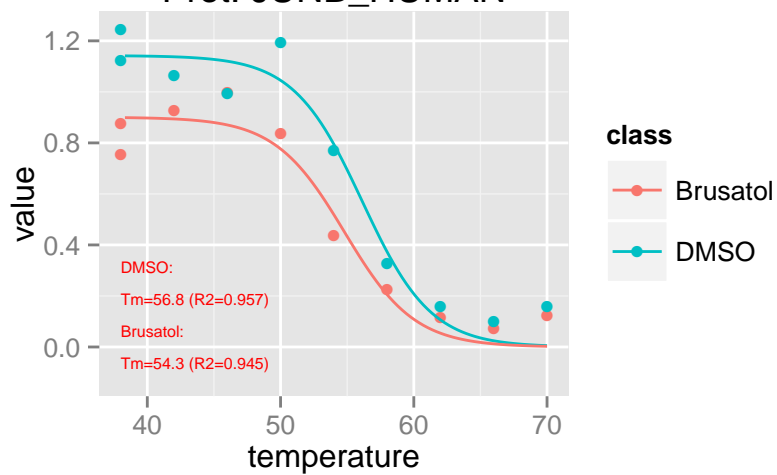

Prot: K0528\_HUMAN

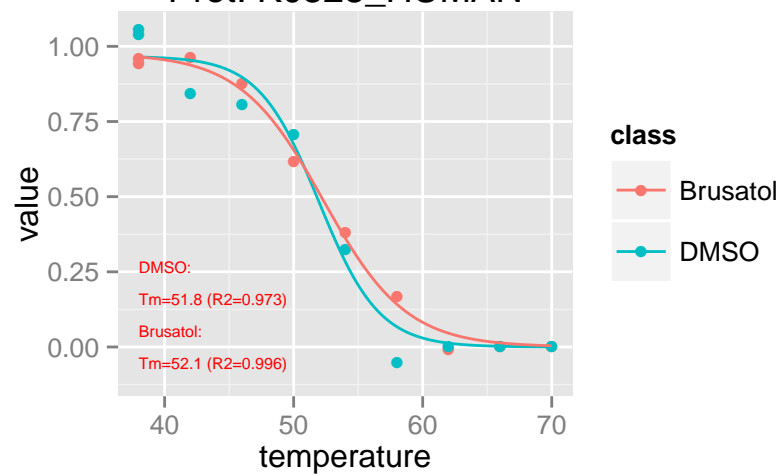

Prot: K0664\_HUMAN

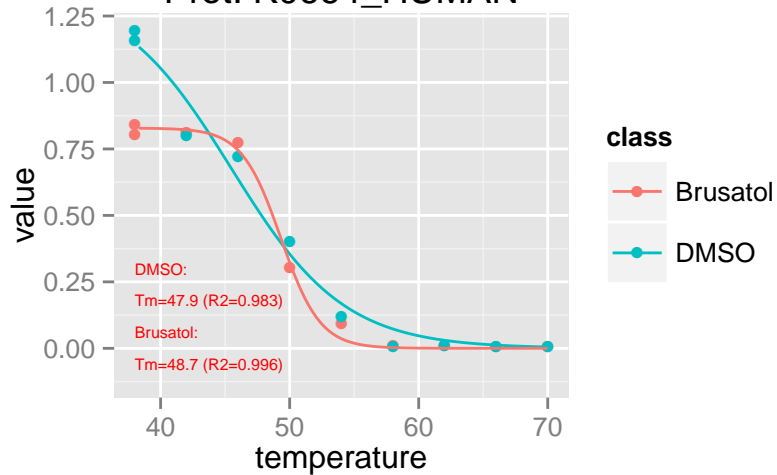

Prot: K1143\_HUMAN

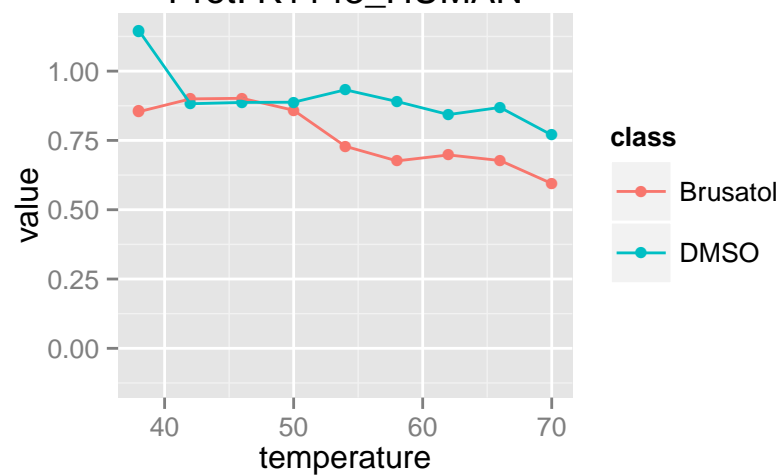



Prot: K1468\_HUMAN

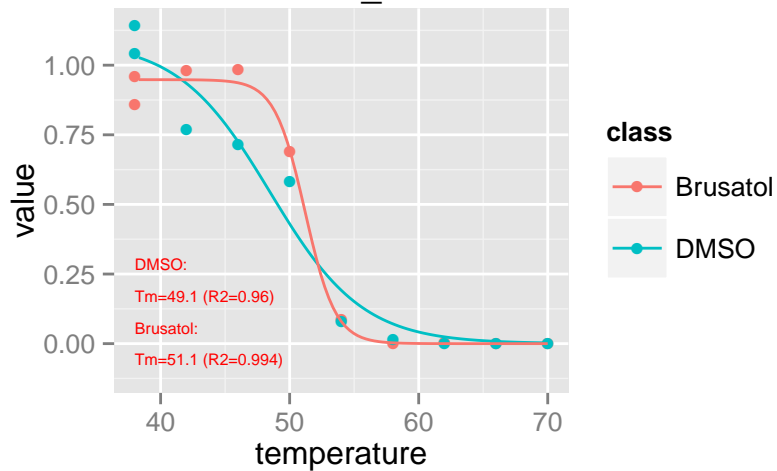

Prot: K1522\_HUMAN

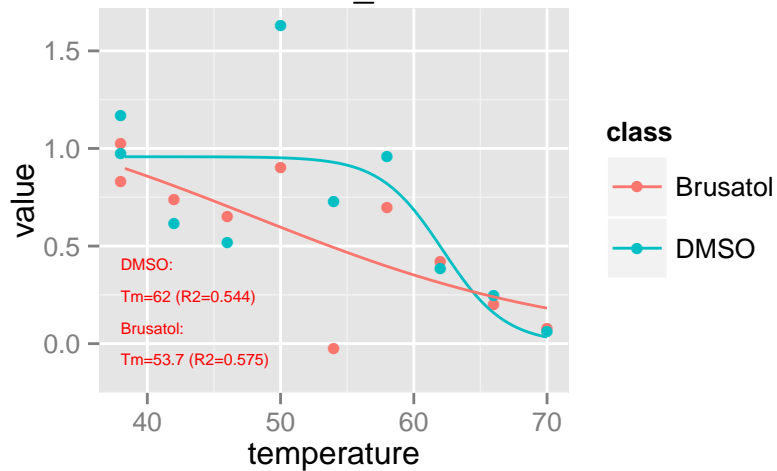

Prot: K1704\_HUMAN

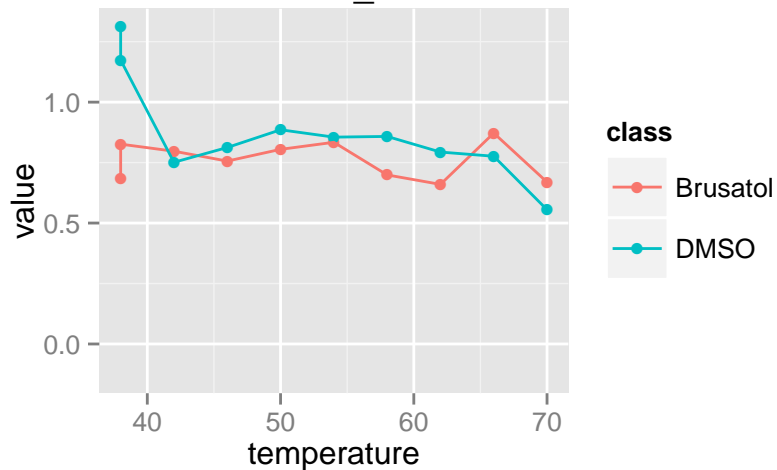

Prot: K1797\_HUMAN

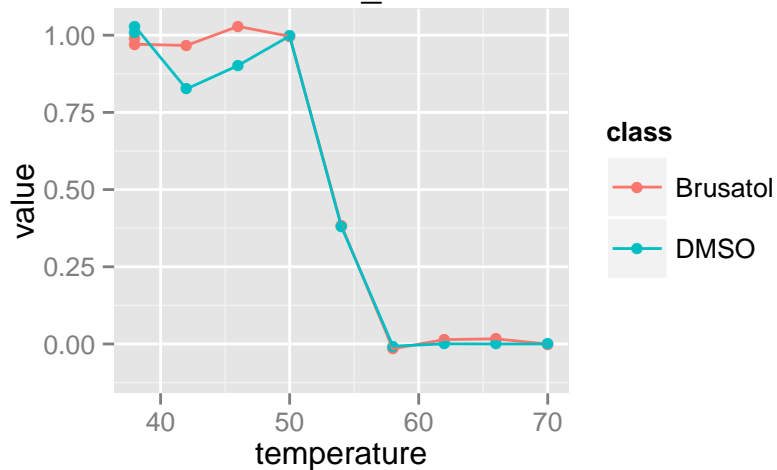

Prot: K1967\_HUMAN

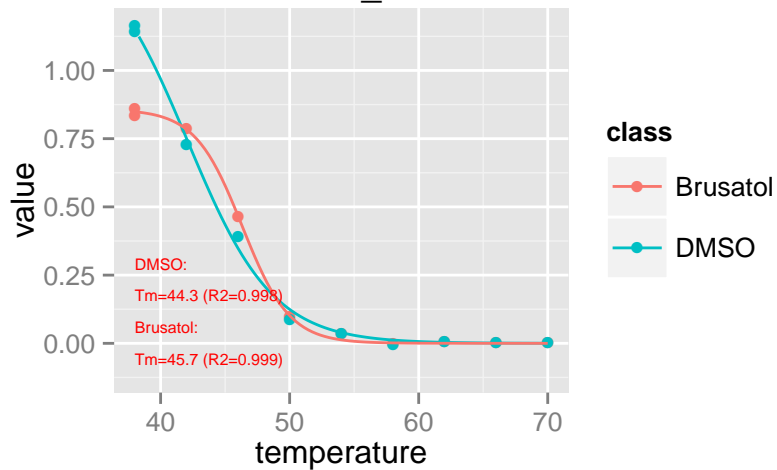

Prot: K1C10\_HUMAN

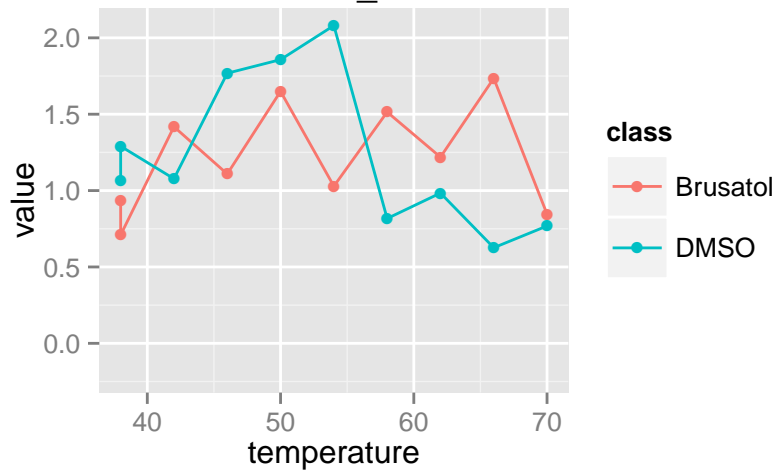

Prot: K1C18\_HUMAN

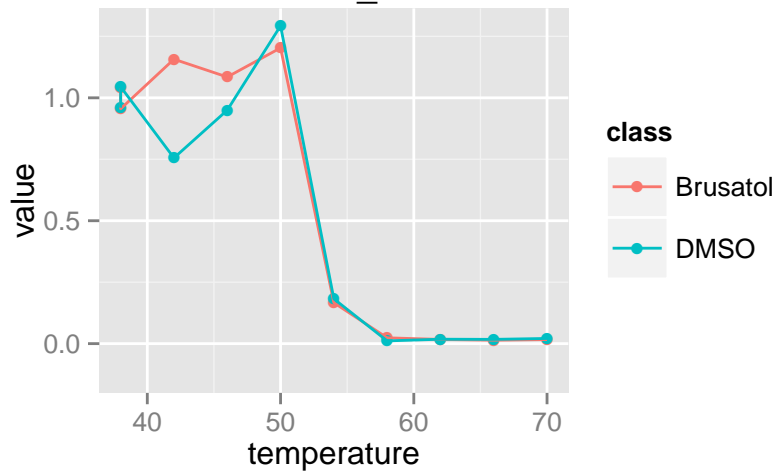

Prot: K1C19\_HUMAN

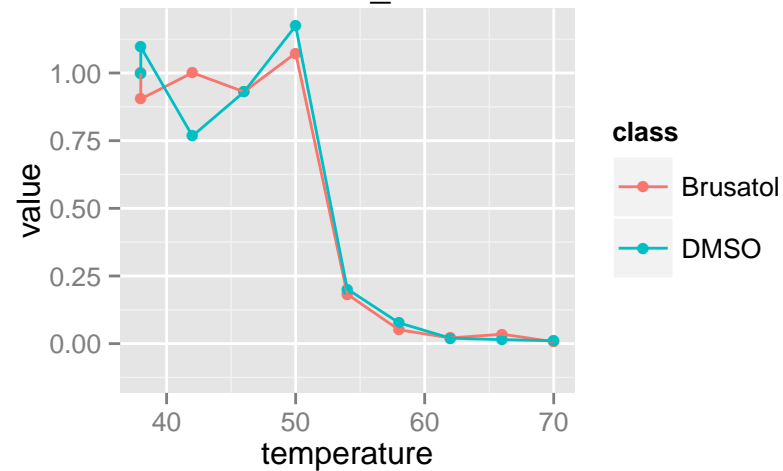

Prot: K1C9\_HUMAN

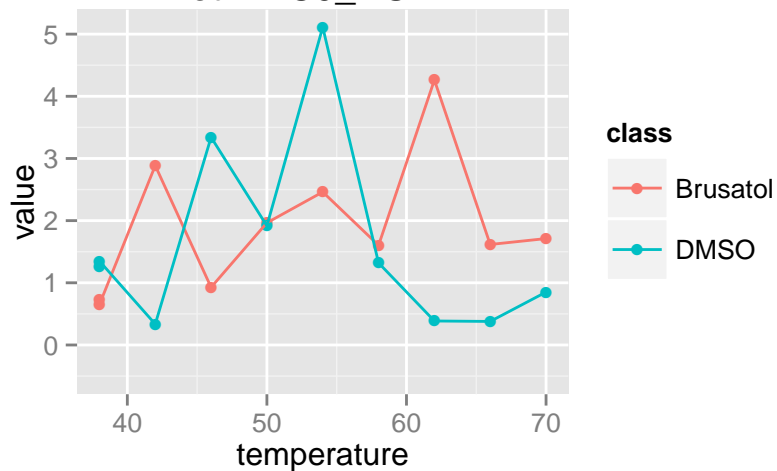

Prot: K22E\_HUMAN

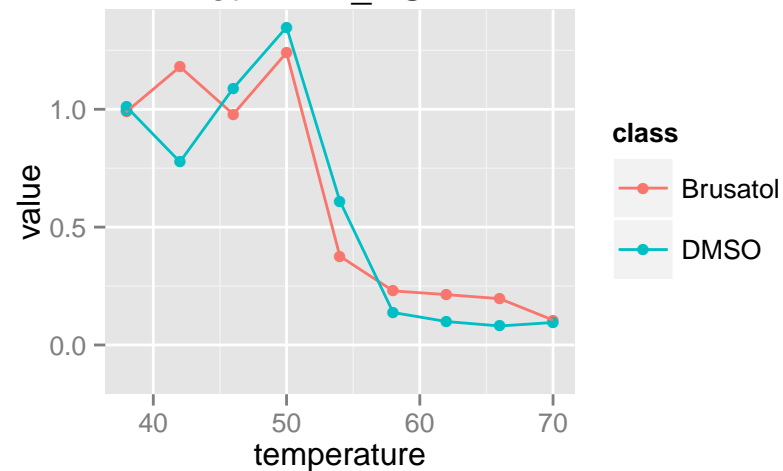

Prot: K2C1\_HUMAN

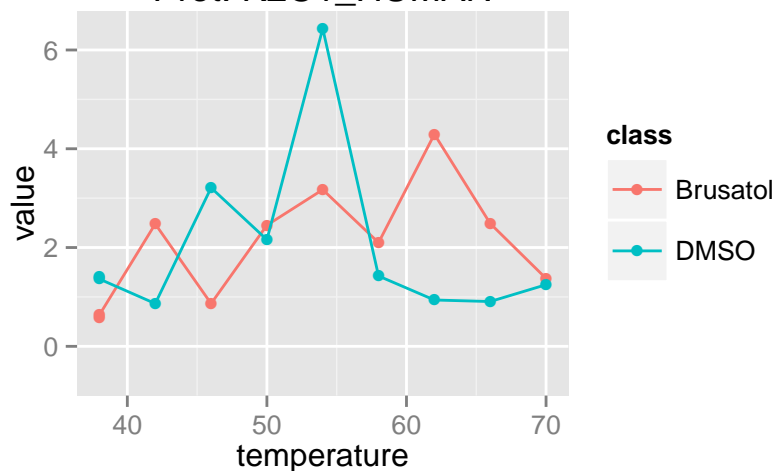

Prot: K2C4\_HUMAN

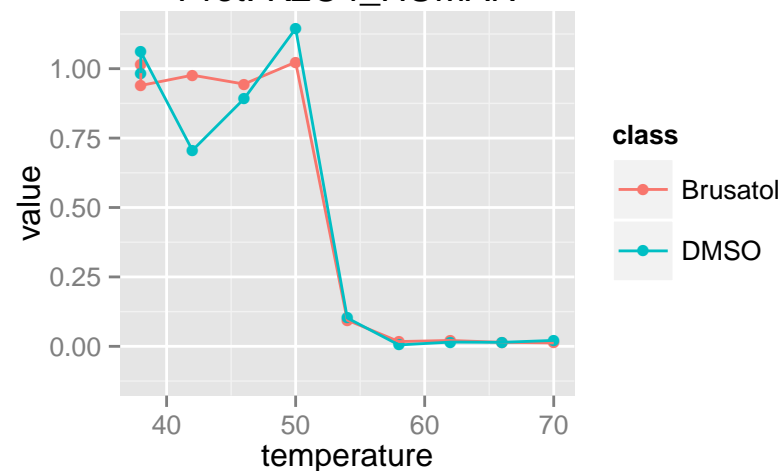

Prot: K2C6A\_HUMAN

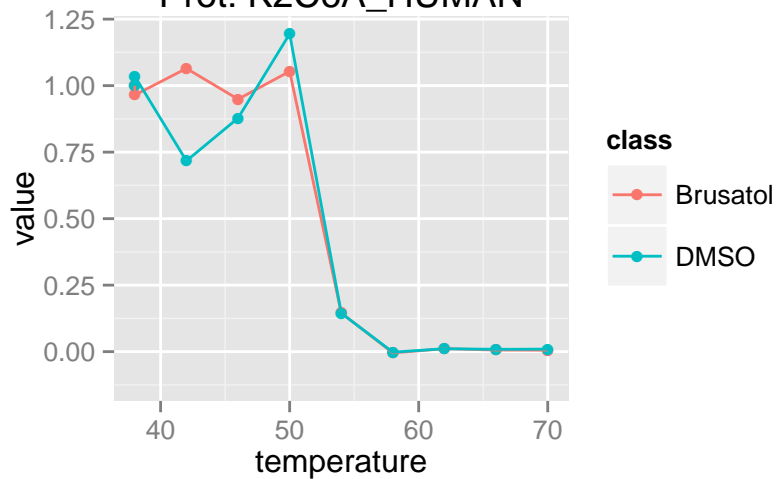

Prot: K2C7\_HUMAN

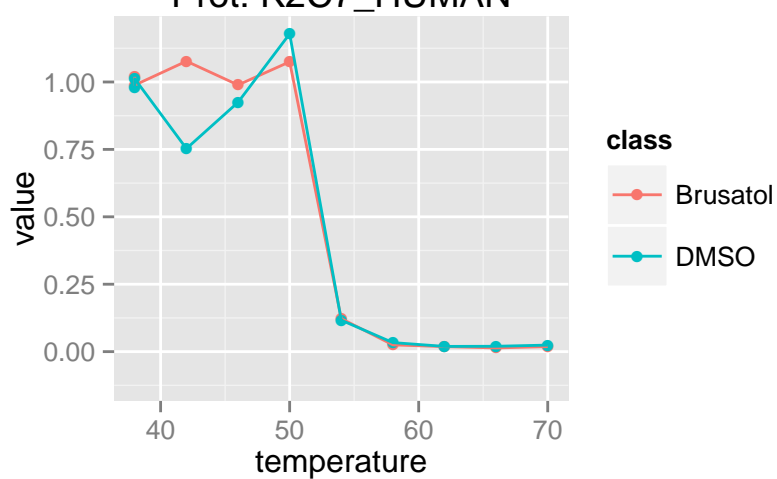

Prot: K2C79\_HUMAN

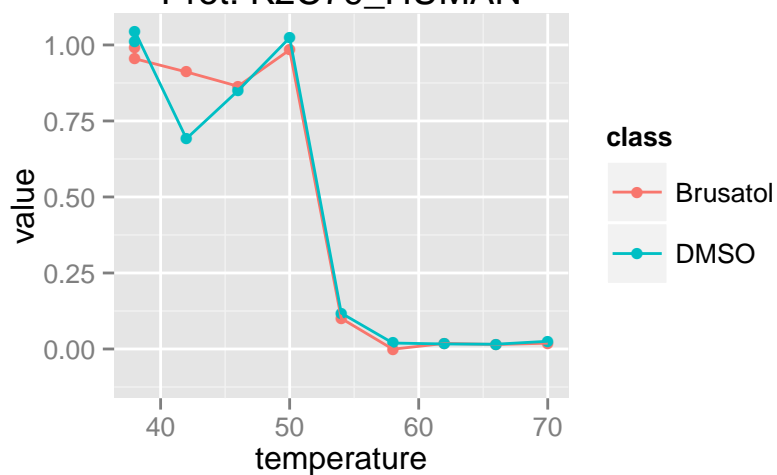

Prot: K2C8\_HUMAN

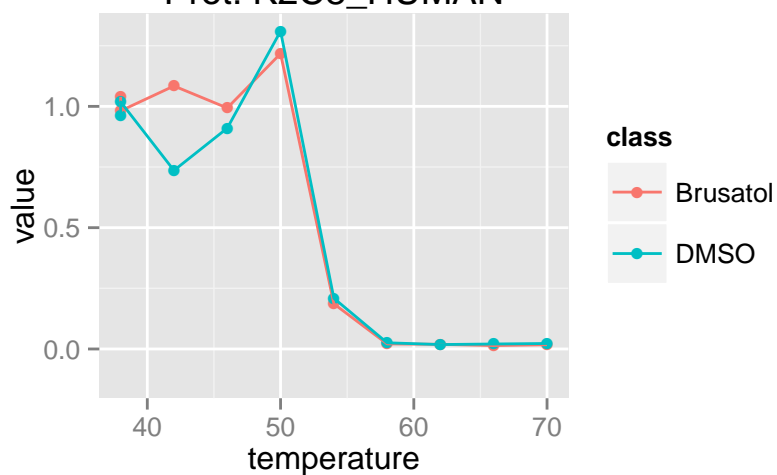

Prot: K6PF\_HUMAN

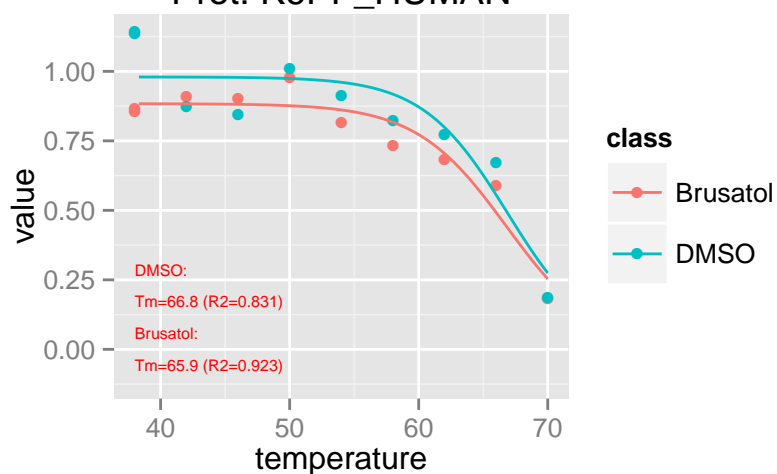

Prot: K6PL\_HUMAN

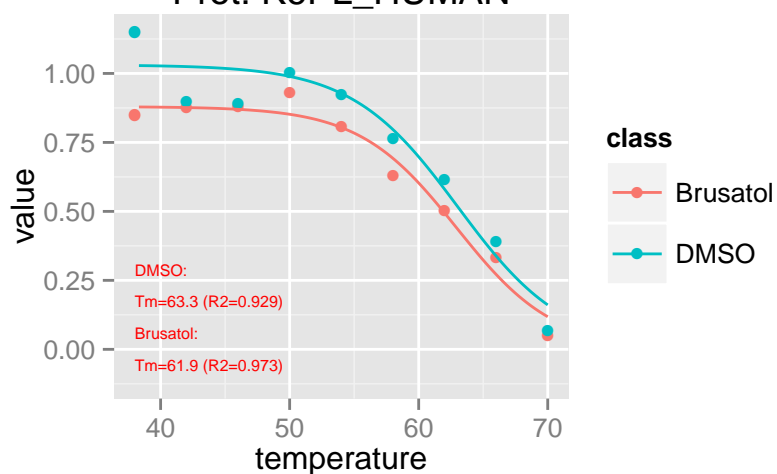

Prot: K6PP\_HUMAN

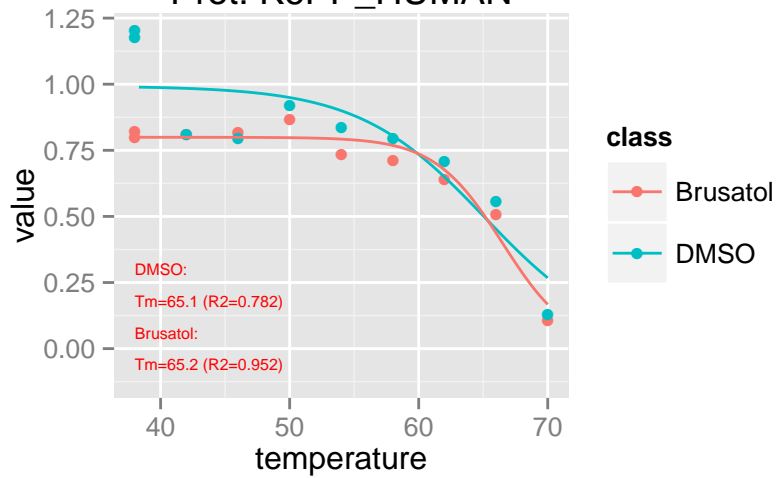

Prot: KAD1\_HUMAN

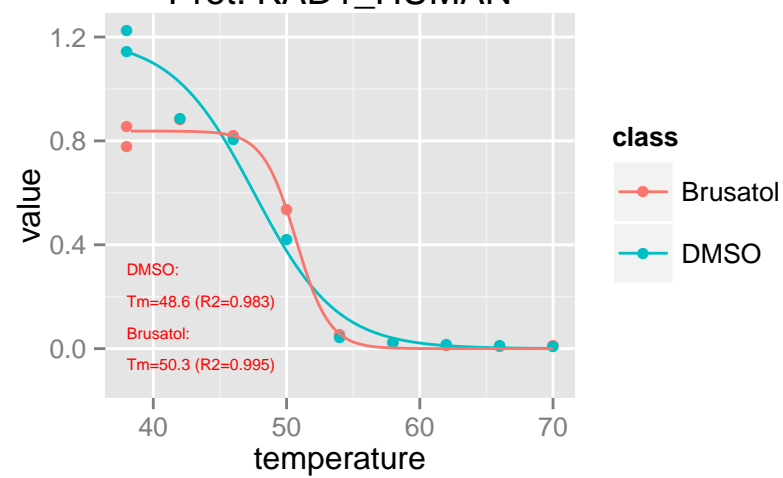

Prot: KAD2\_HUMAN

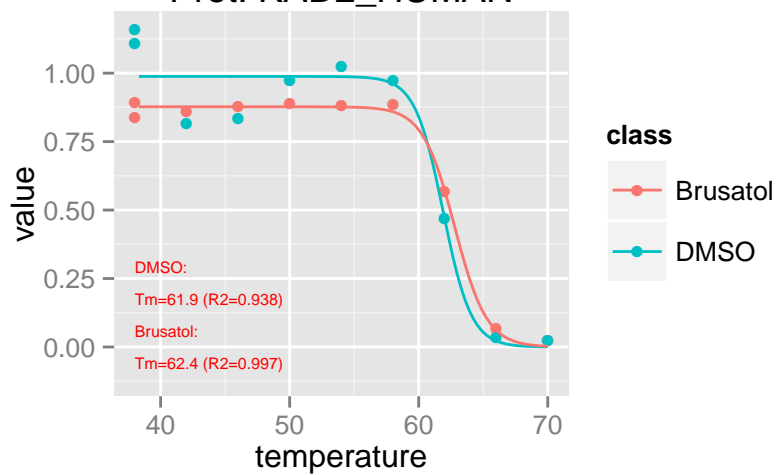

Prot: KAD3\_HUMAN

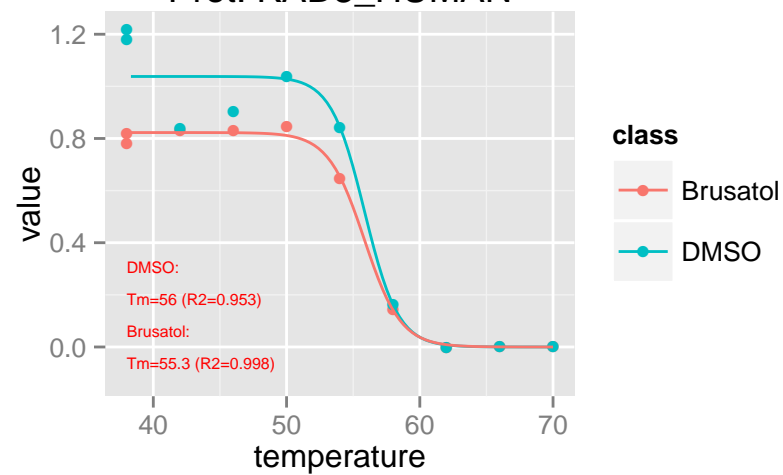

Prot: KAD4\_HUMAN

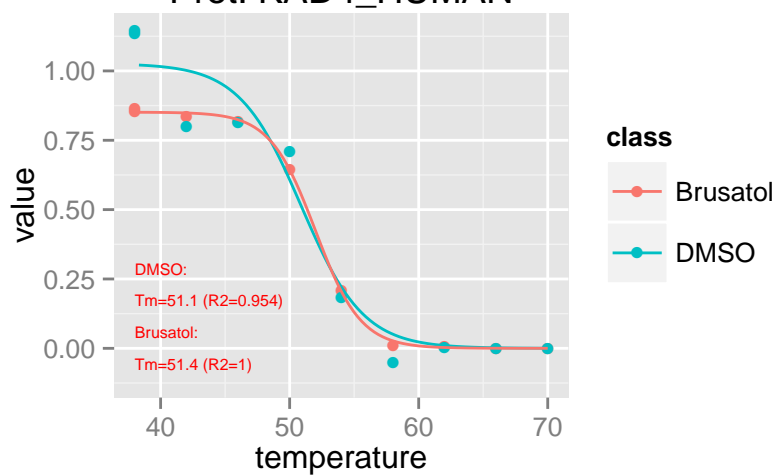

Prot: KAD6\_HUMAN

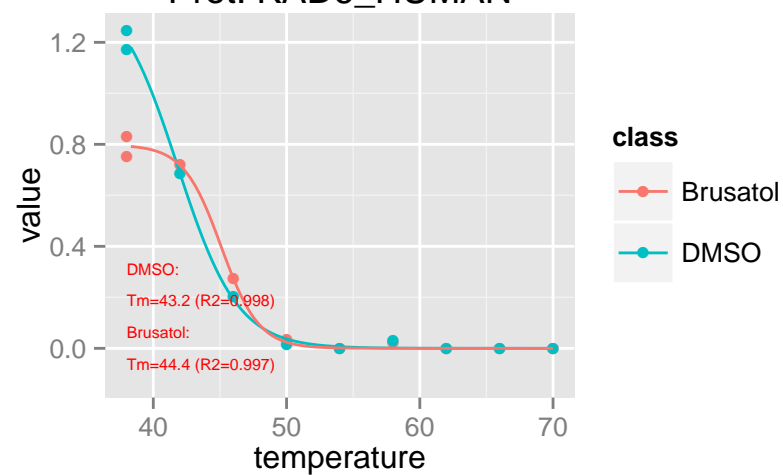

Prot: KAP0\_HUMAN

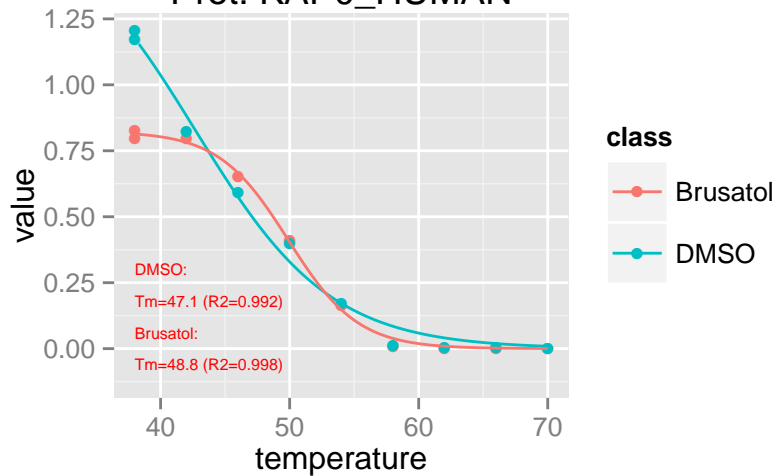

Prot: KAP2\_HUMAN

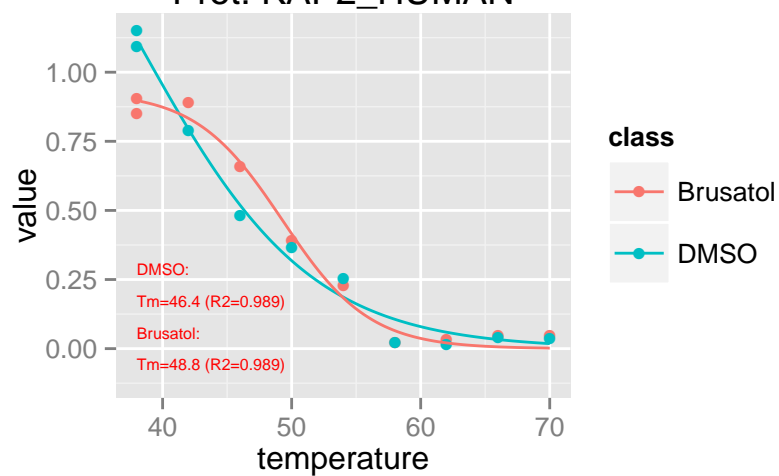

Prot: KAPCA\_HUMAN

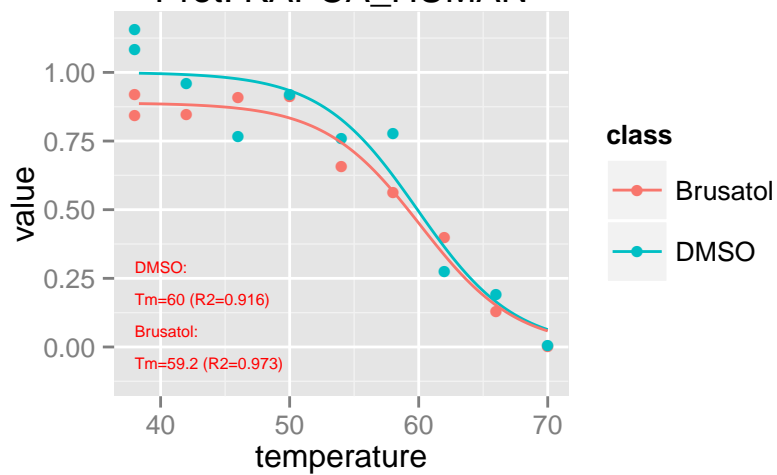

Prot: KAPCB\_HUMAN

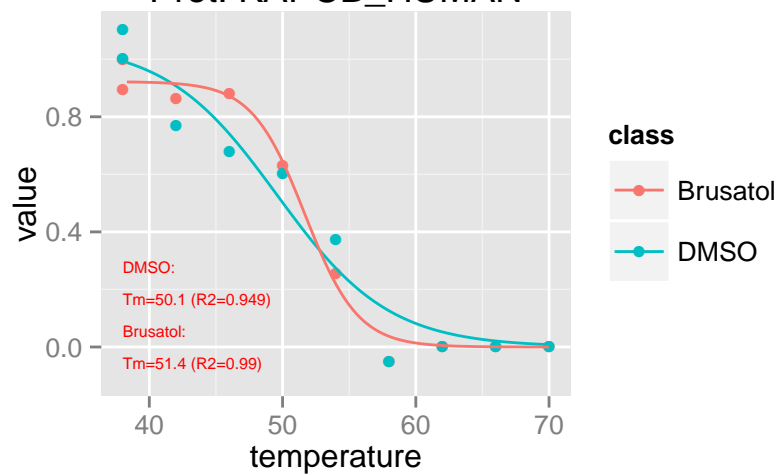

Prot: KAT1\_HUMAN

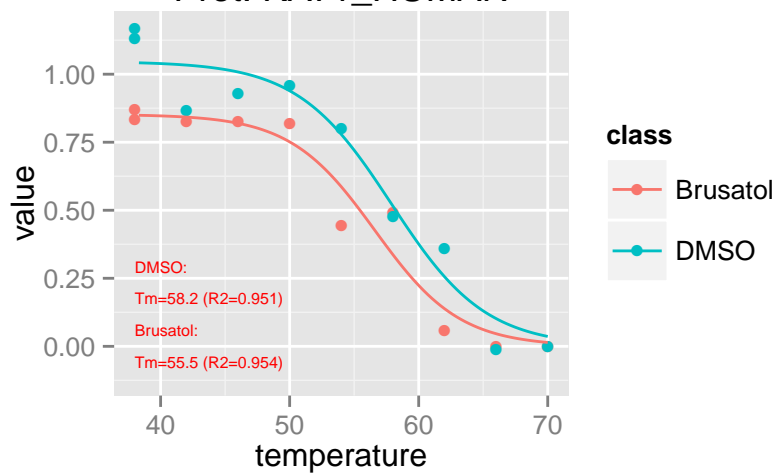

Prot: KAT3\_HUMAN

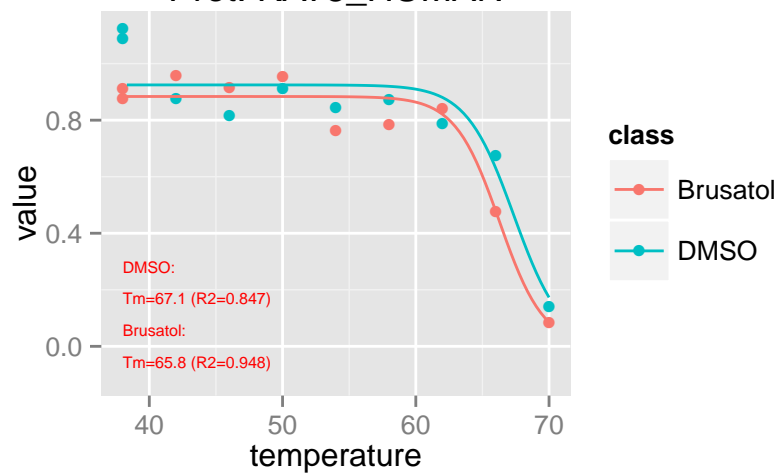

Prot: KBP\_HUMAN

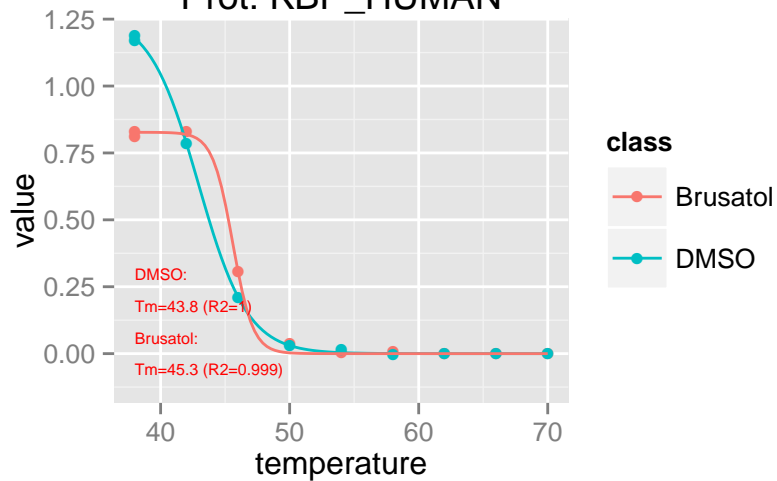

Prot: KC1A\_HUMAN

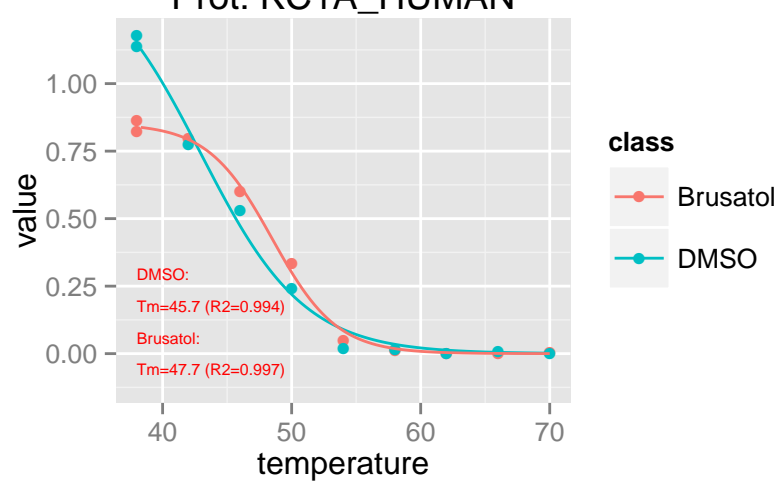

Prot: KCC1A\_HUMAN

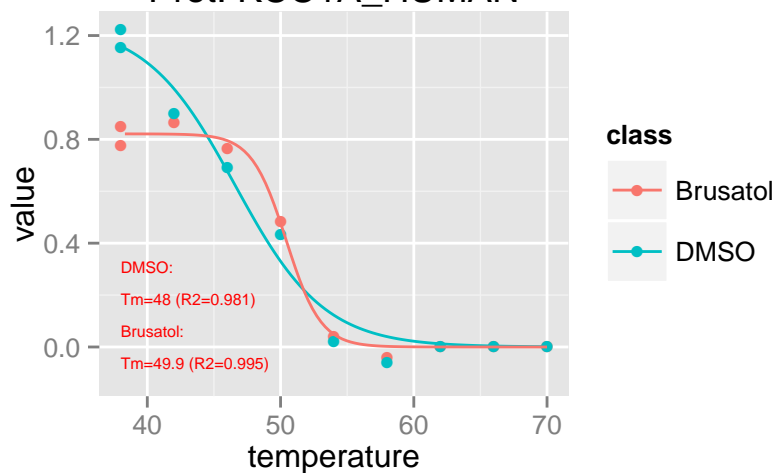

Prot: KCC2A\_HUMAN

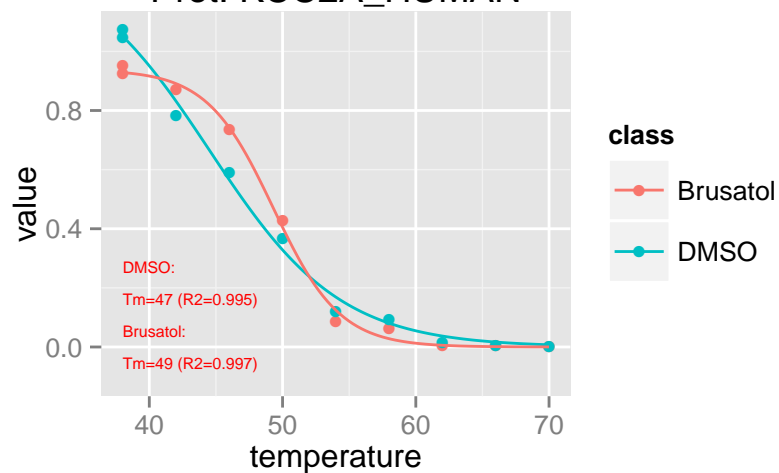

Prot: KCC2D\_HUMAN

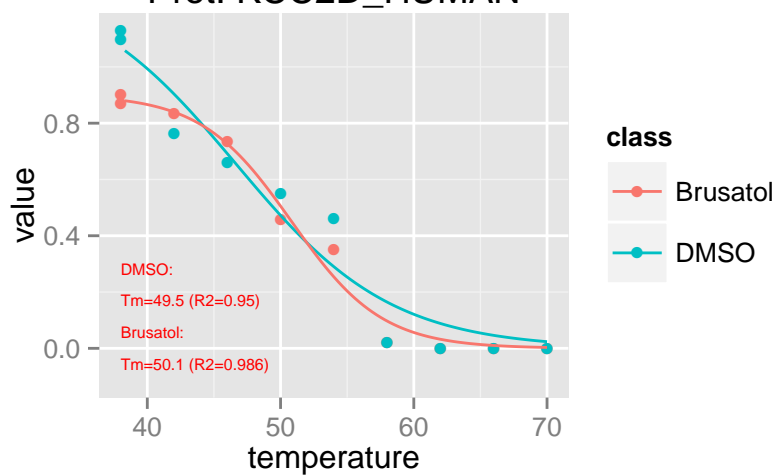

Prot: KCC2G\_HUMAN

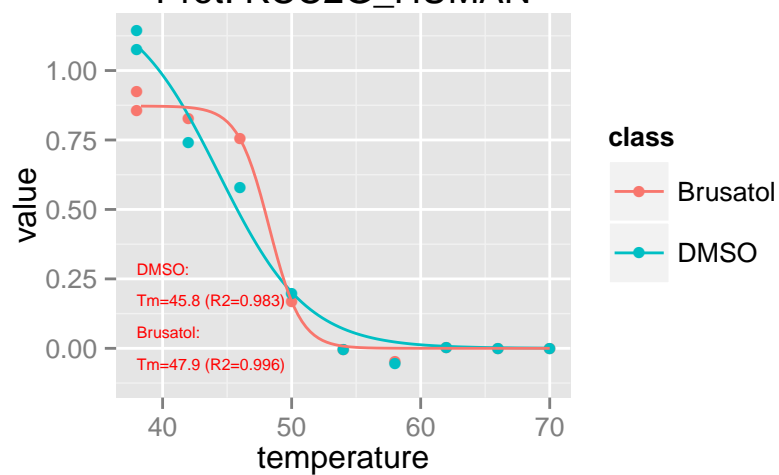

Prot: KCD15\_HUMAN

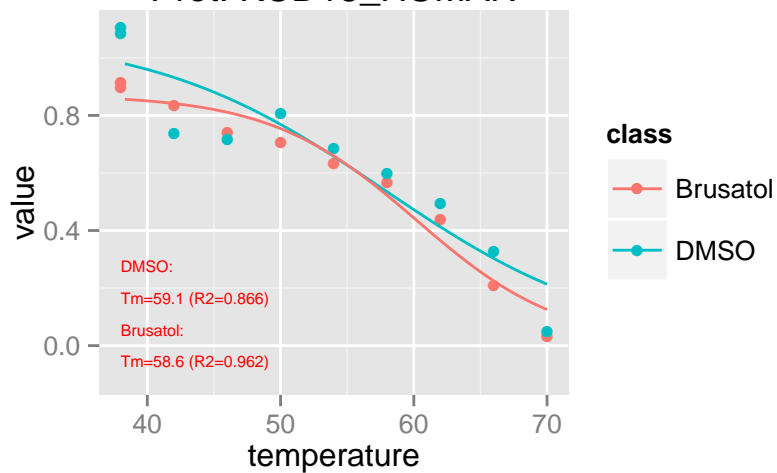

Prot: KCMF1\_HUMAN

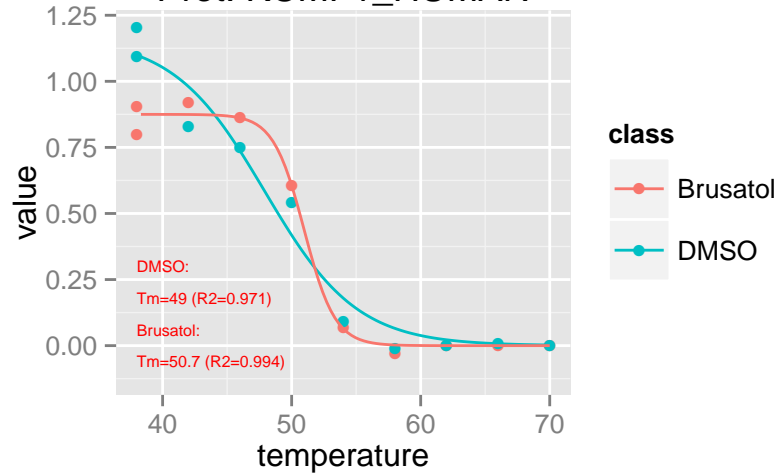

Prot: KCRB\_HUMAN

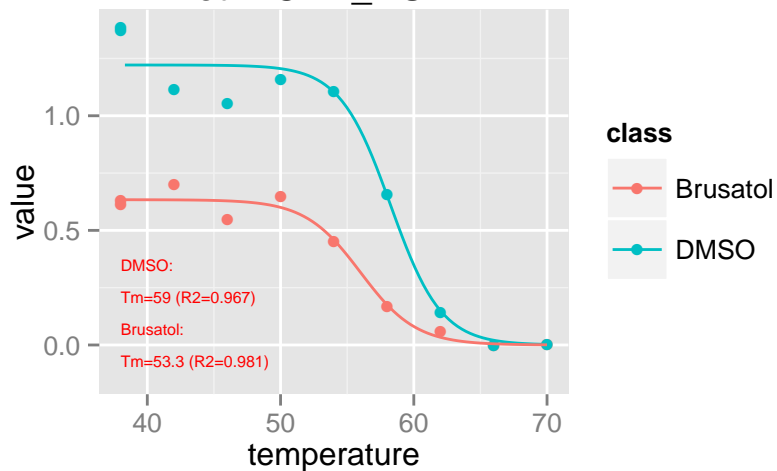

Prot: KCTD9\_HUMAN

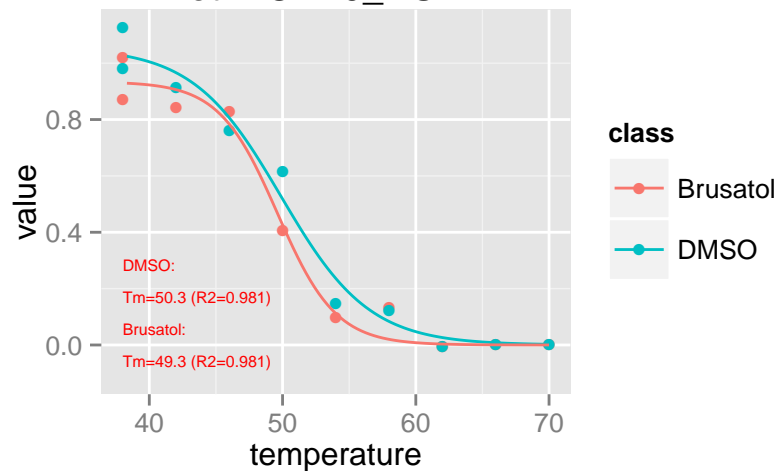

Prot: KCY\_HUMAN

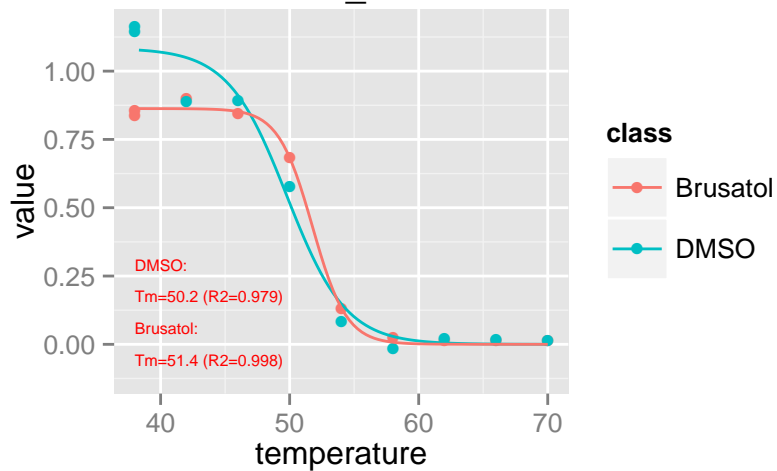

Prot: KDEL2\_HUMAN

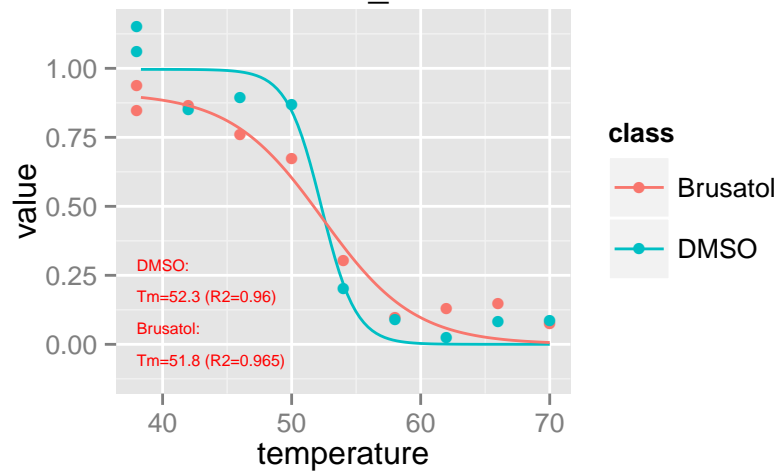

Prot: KDM1A\_HUMAN

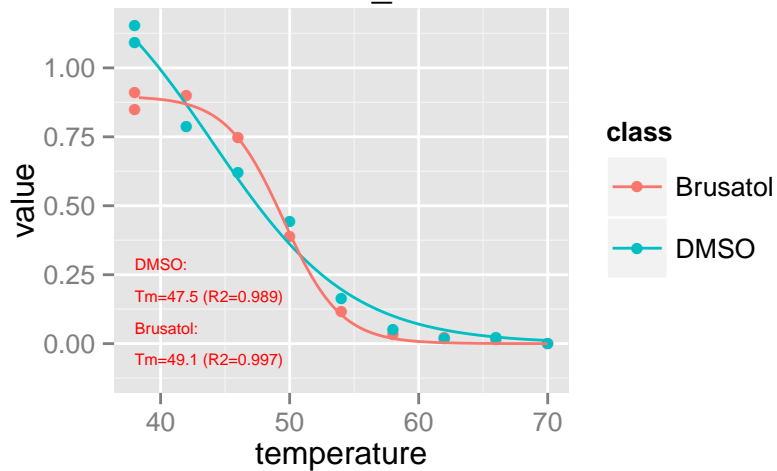

Prot: KDM3B\_HUMAN

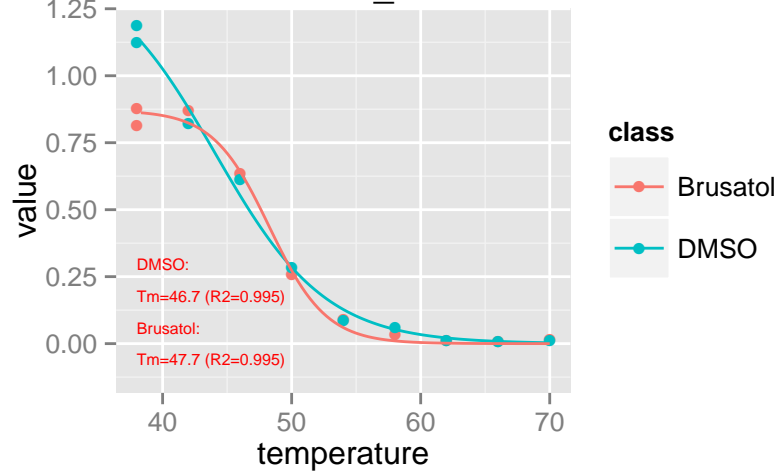

Prot: KHDR1\_HUMAN

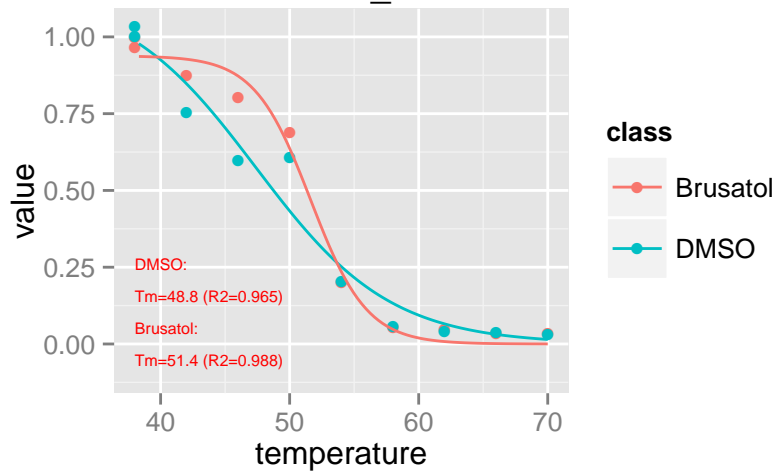

Prot: KHK\_HUMAN

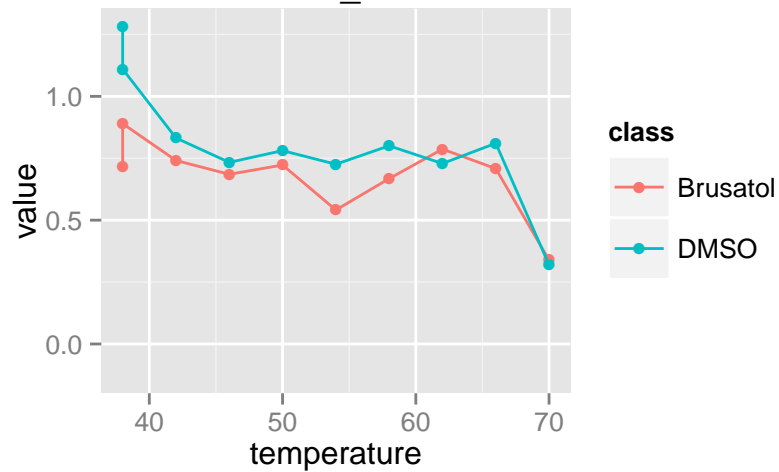

Prot: KI13A\_HUMAN

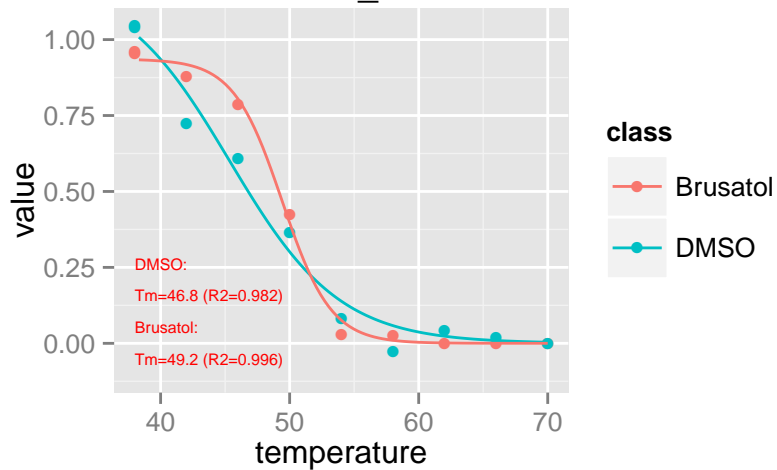

Prot: KI13B\_HUMAN

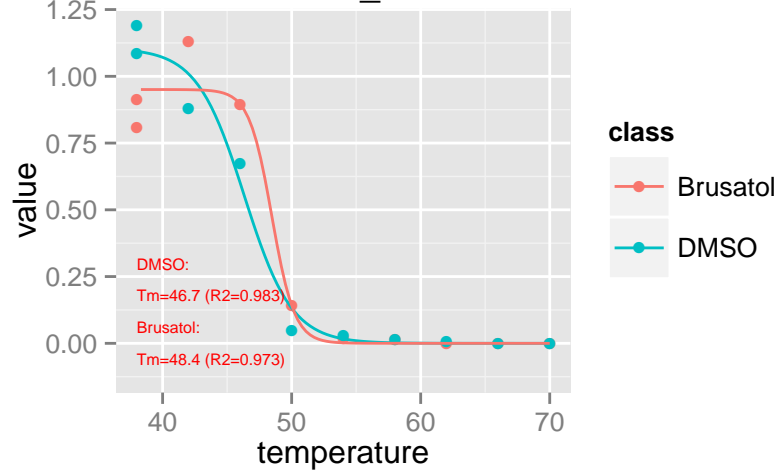



Prot: KI21A\_HUMAN

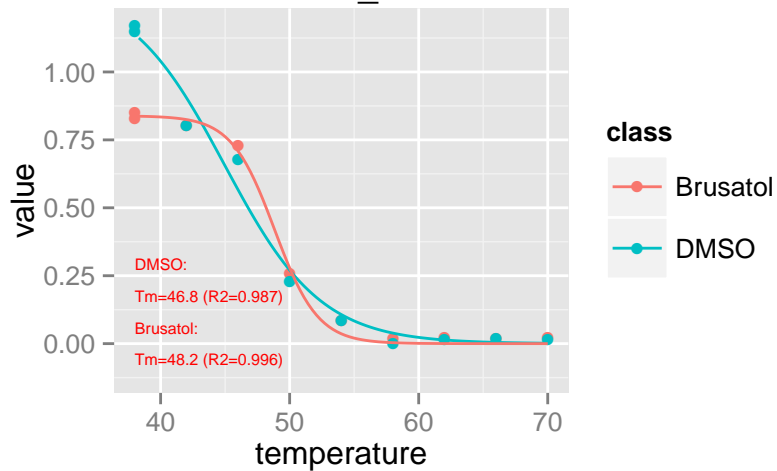

Prot: KI67\_HUMAN

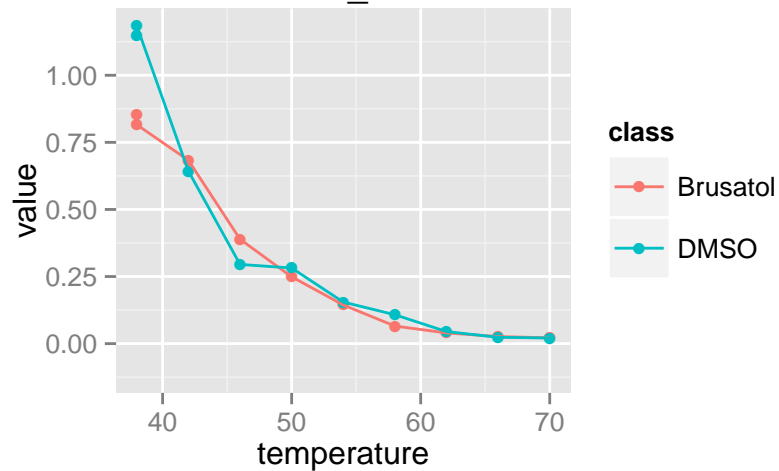

Prot: KIF11\_HUMAN

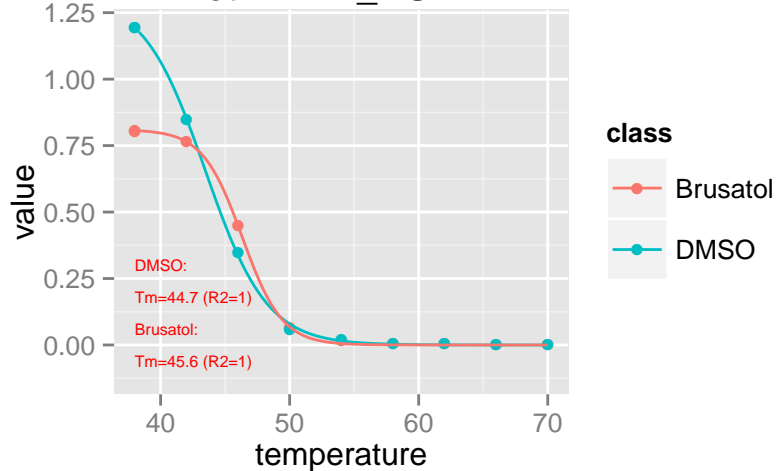

Prot: KIF15\_HUMAN

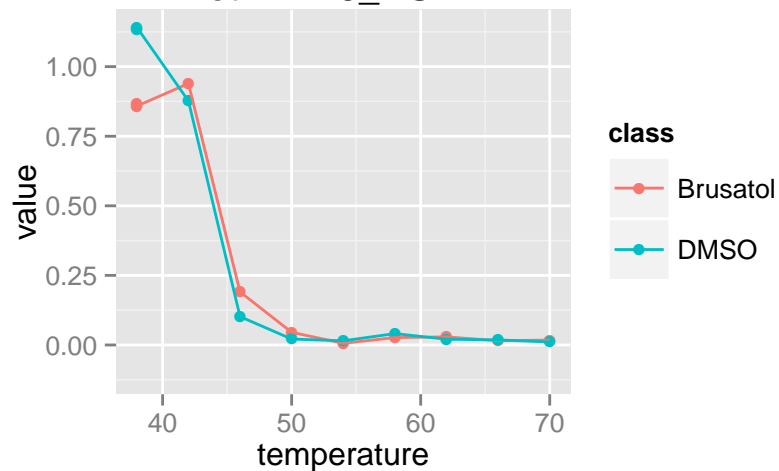

Prot: KIF1B\_HUMAN

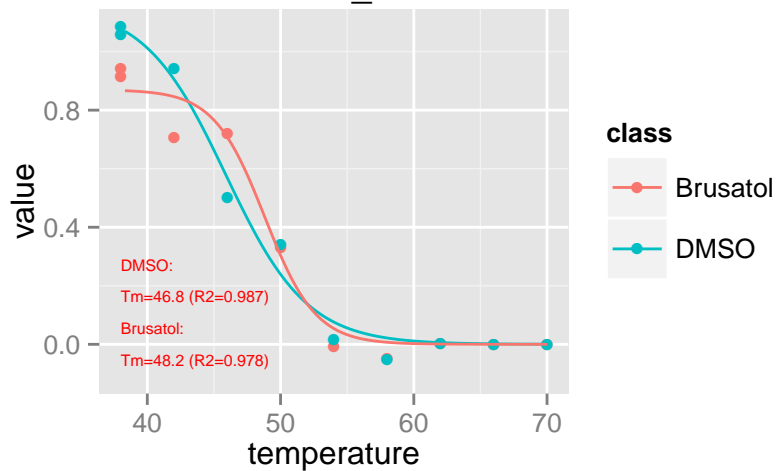

Prot: KIF1C\_HUMAN

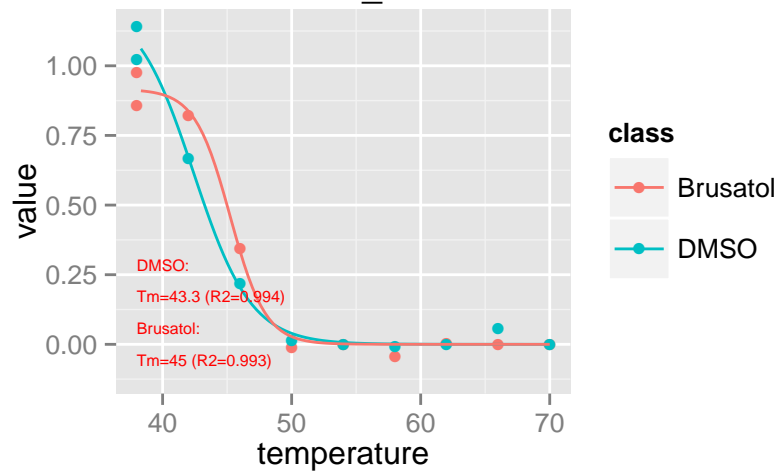

Prot: KIF23\_HUMAN

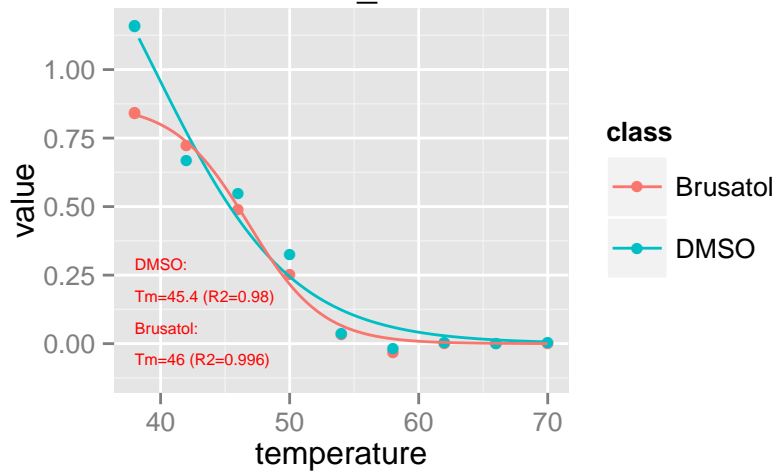

Prot: KIF2A\_HUMAN

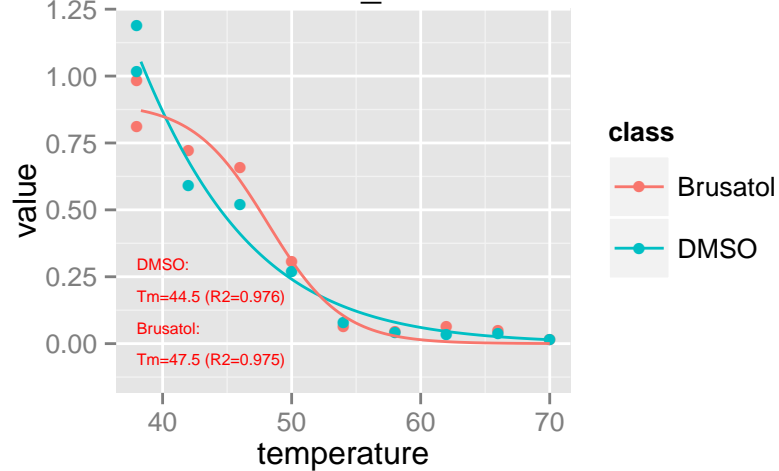

Prot: KIF2C\_HUMAN

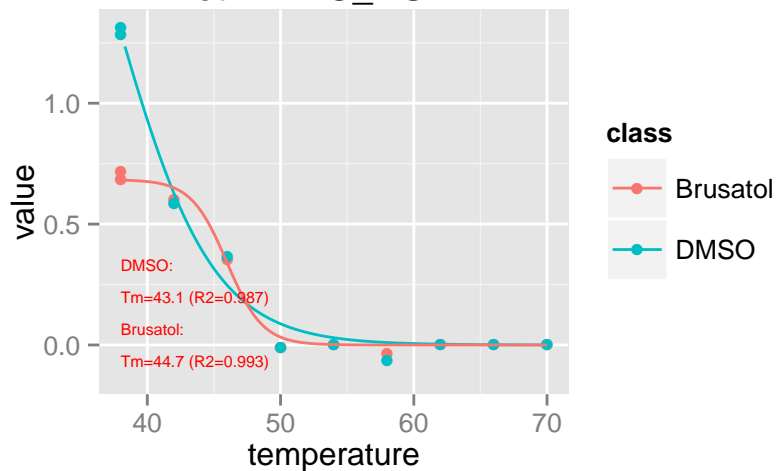

Prot: KIF3A\_HUMAN

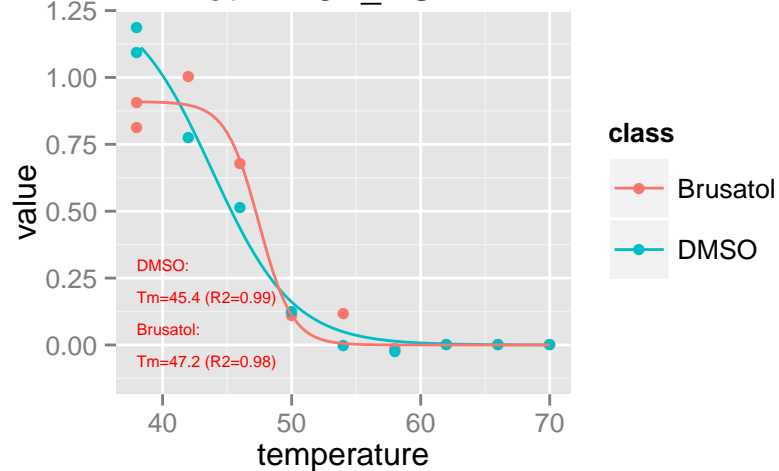

Prot: KIF4A\_HUMAN

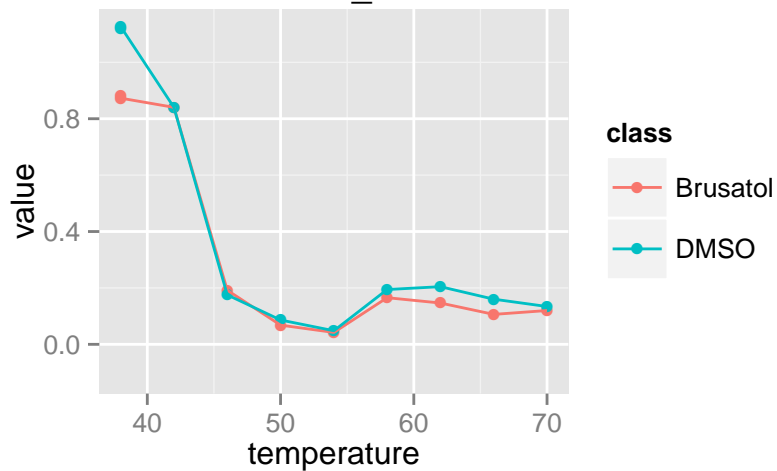

Prot: KIF5A\_HUMAN

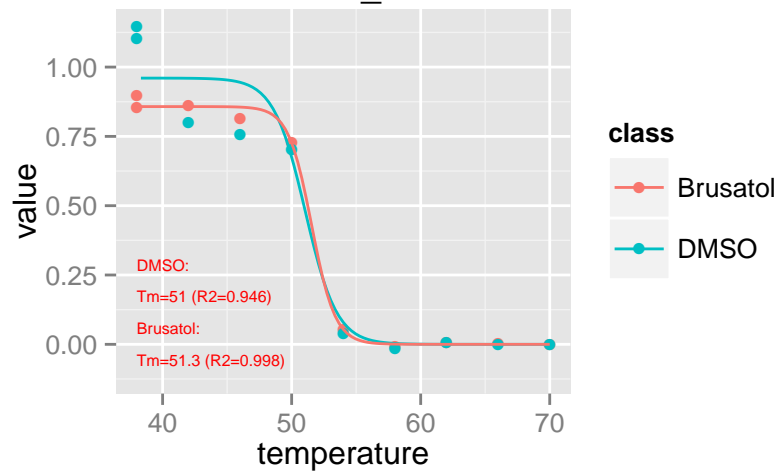

Prot: KIF5C\_HUMAN

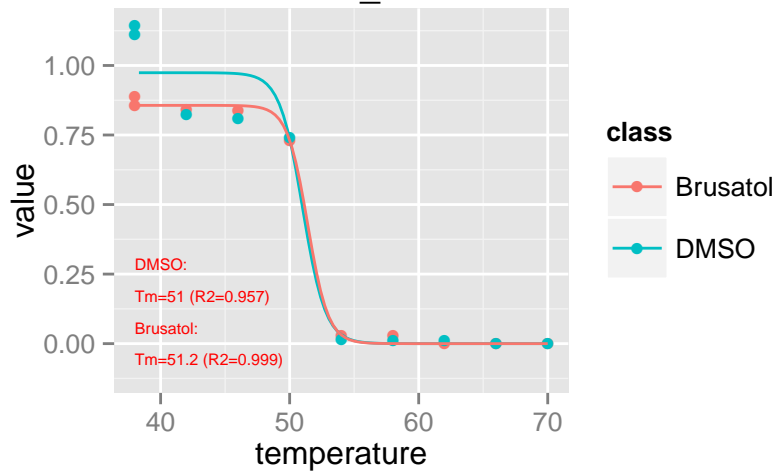

Prot: KIFC3\_HUMAN

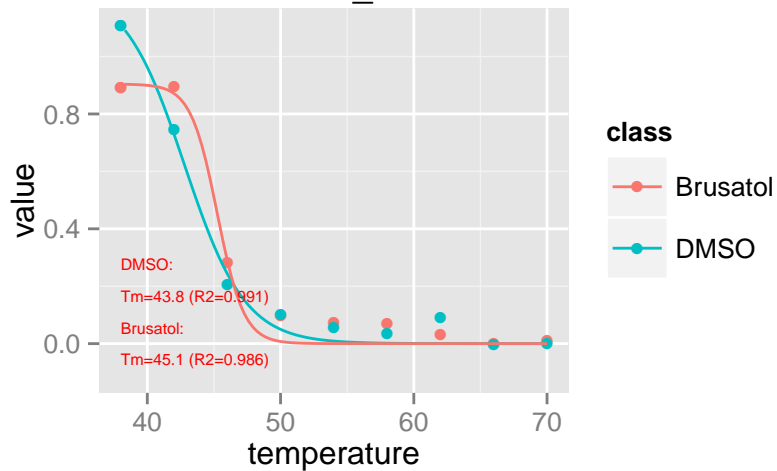

Prot: KIME\_HUMAN

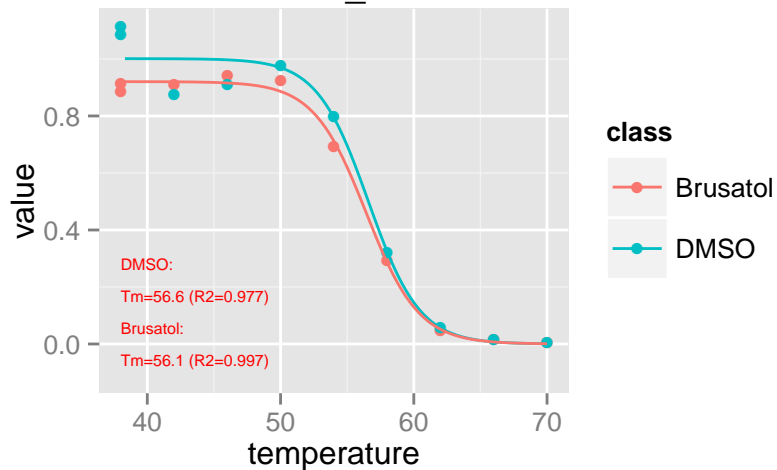

Prot: KINH\_HUMAN

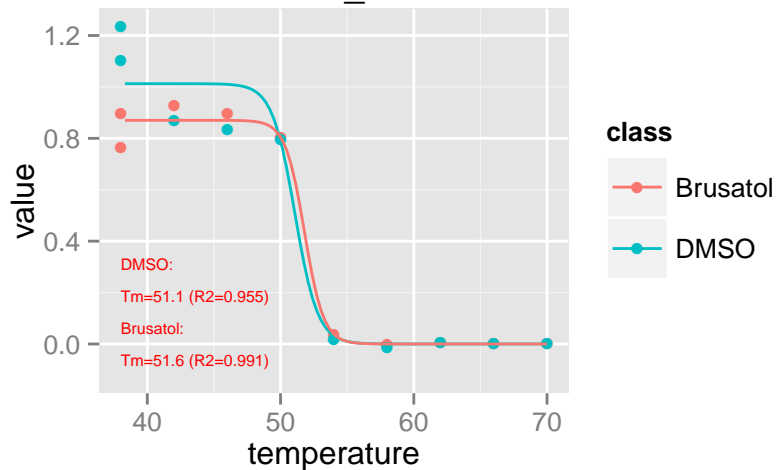

Prot: KITH\_HUMAN

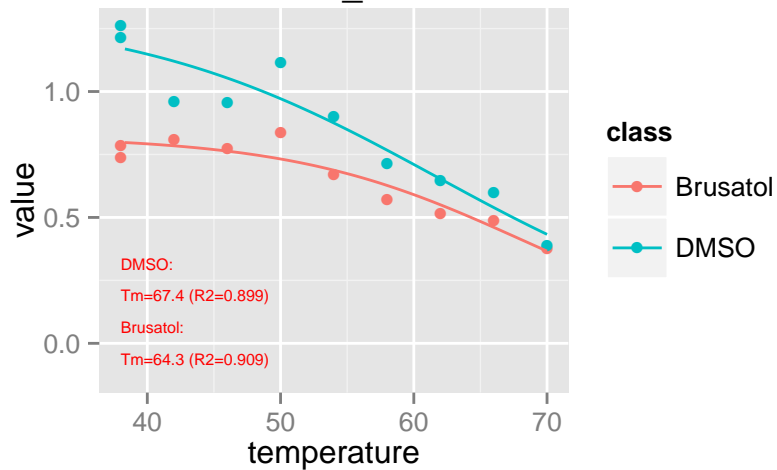

Prot: KLC1\_HUMAN

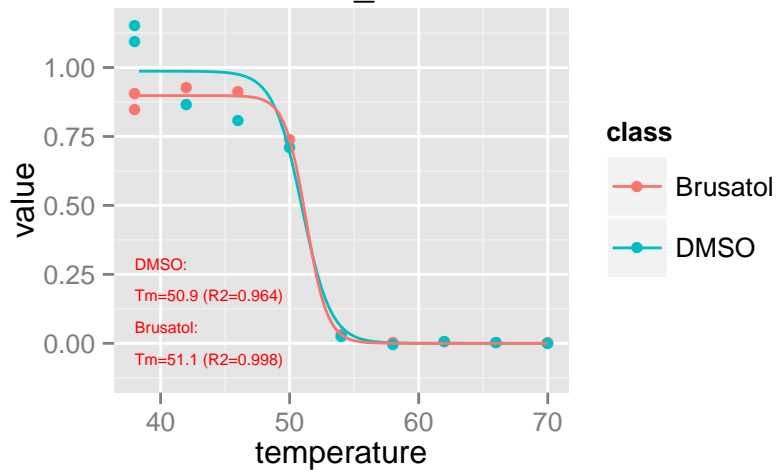

Prot: KLC2\_HUMAN

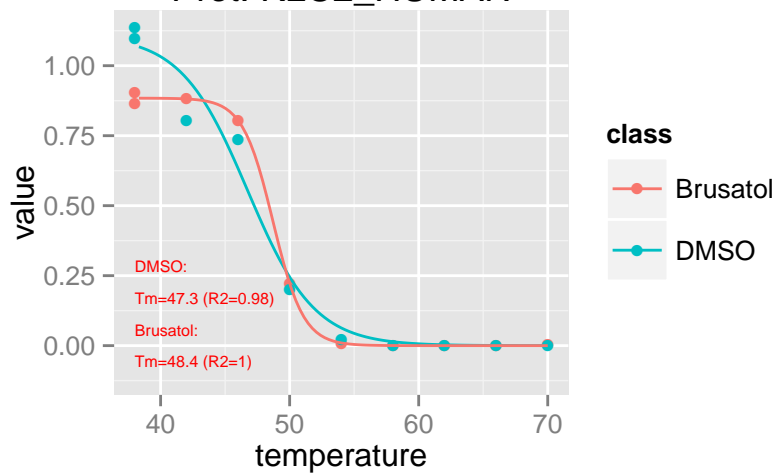

Prot: KNTC1\_HUMAN

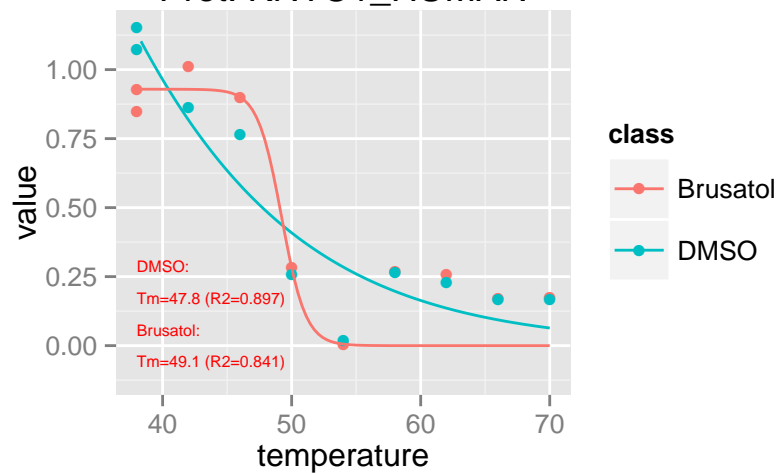

Prot: KPB1\_HUMAN

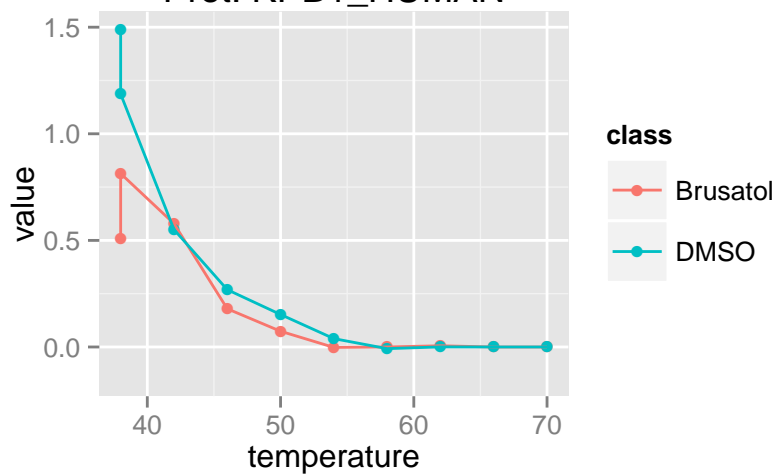

Prot: KPBB\_HUMAN

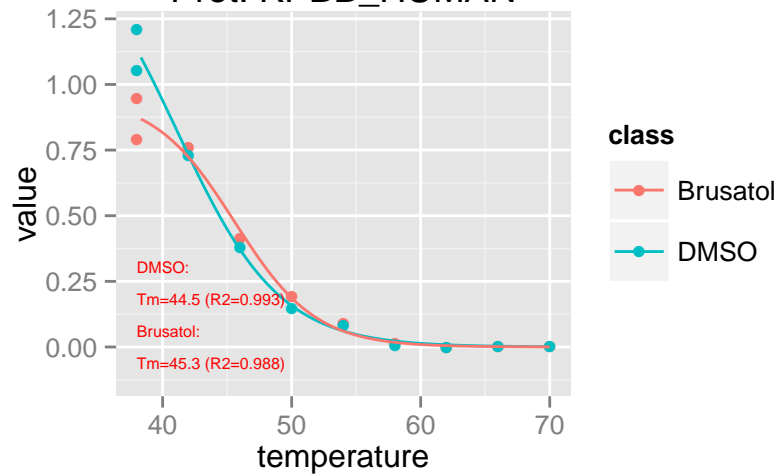

Prot: KPCA\_HUMAN

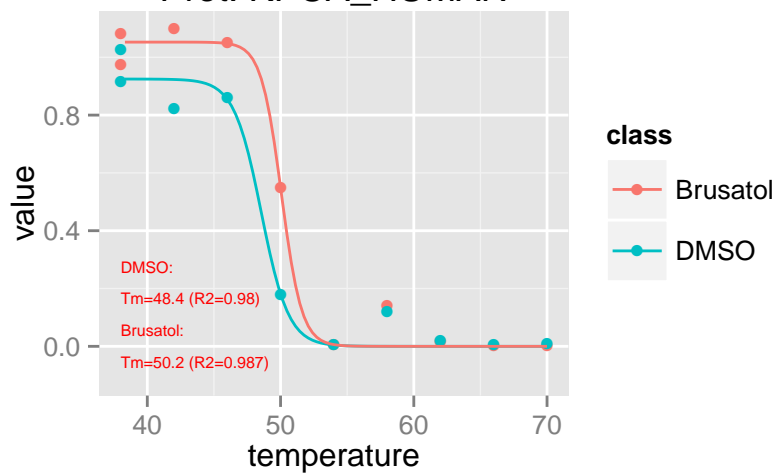

Prot: KPCD\_HUMAN

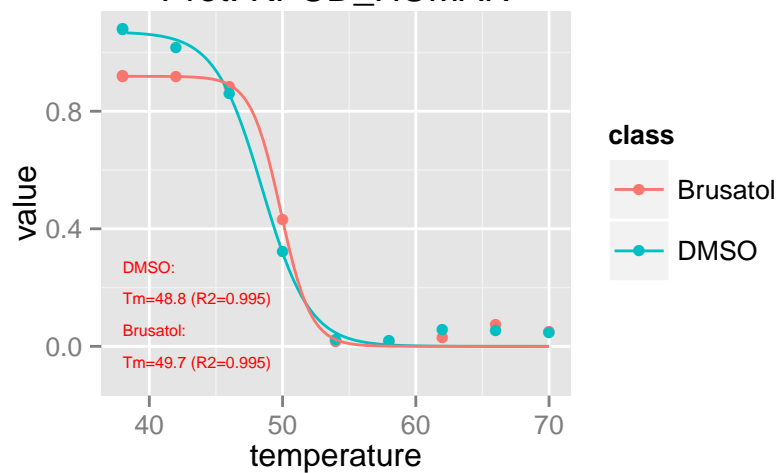

Prot: KPCI\_HUMAN

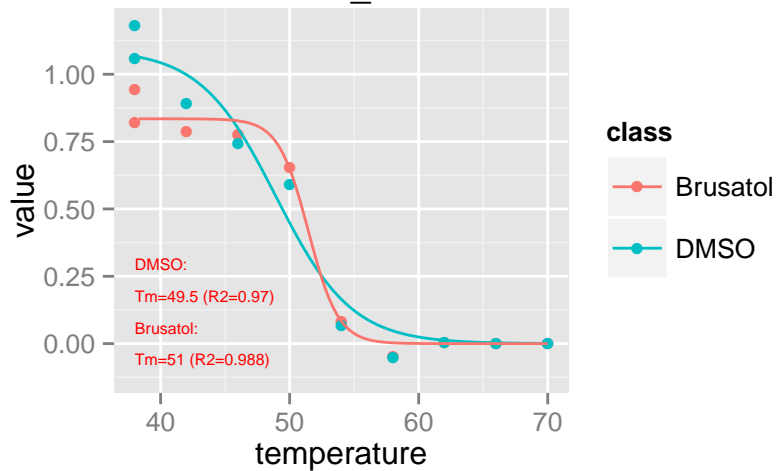

Prot: KPRA\_HUMAN

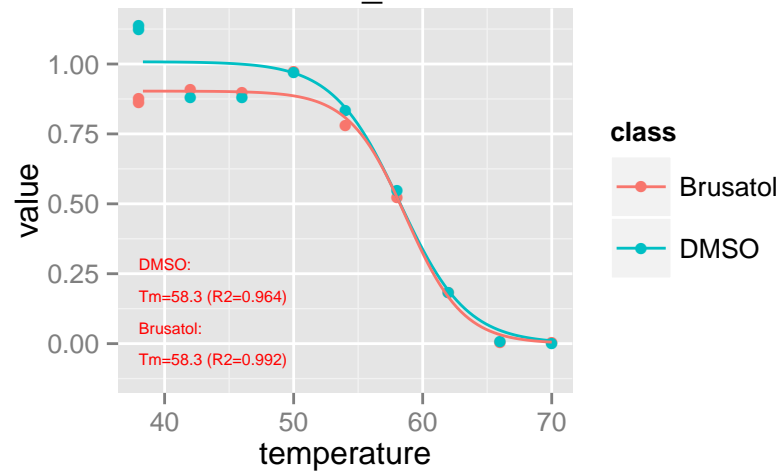

Prot: KPRB\_HUMAN

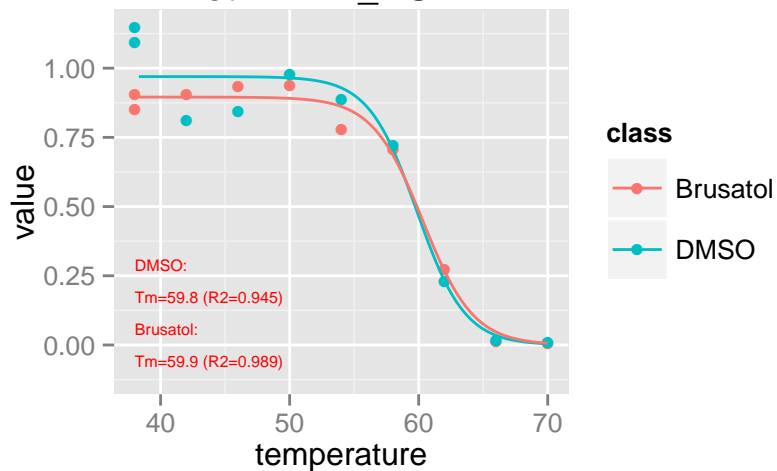

Prot: KPYM\_HUMAN

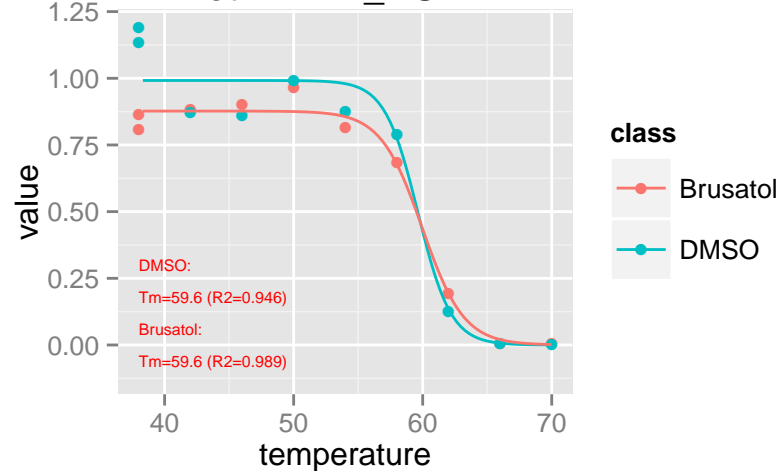

Prot: KPYP\_HUMAN

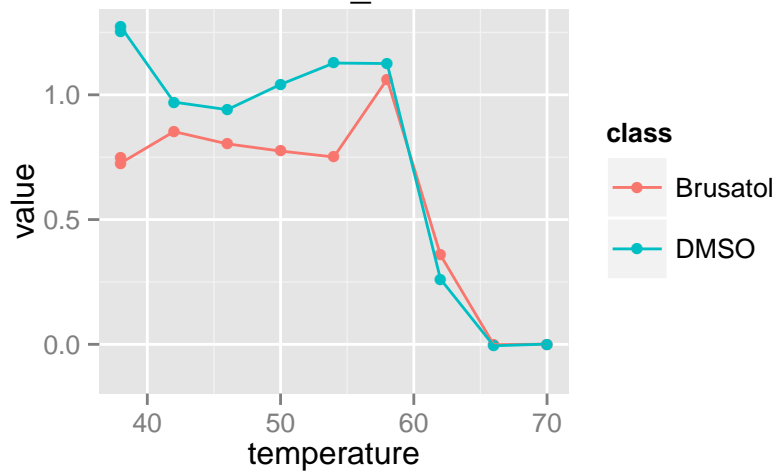

Prot: KRT81\_HUMAN

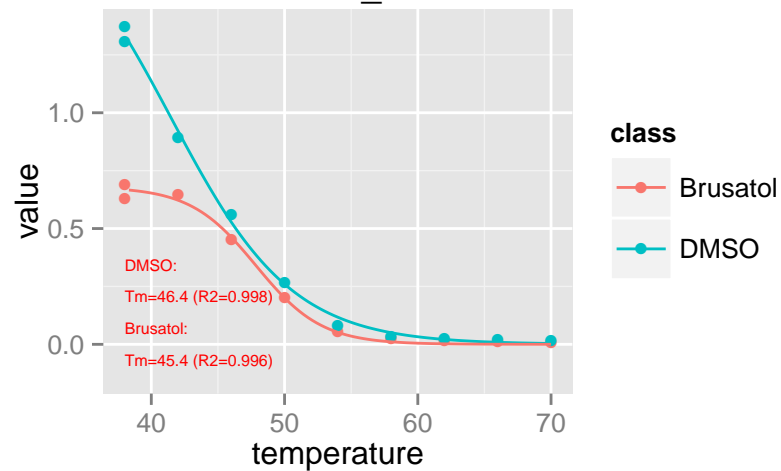

Prot: KS6A1\_HUMAN

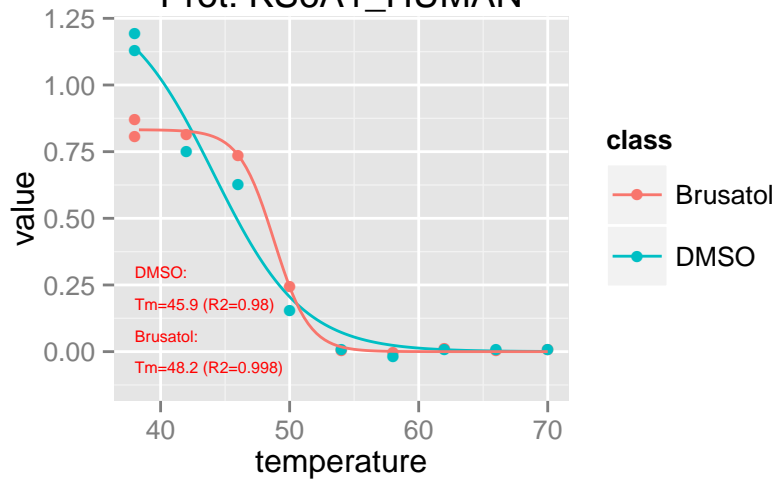

Prot: KS6A2\_HUMAN

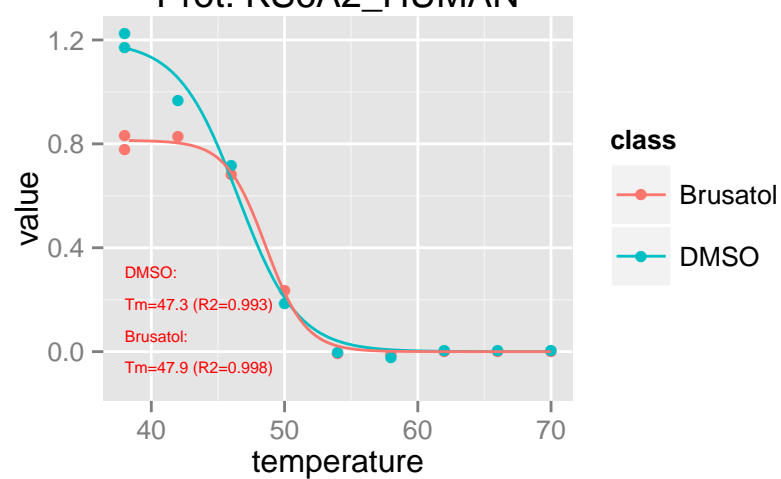

Prot: KS6A3\_HUMAN

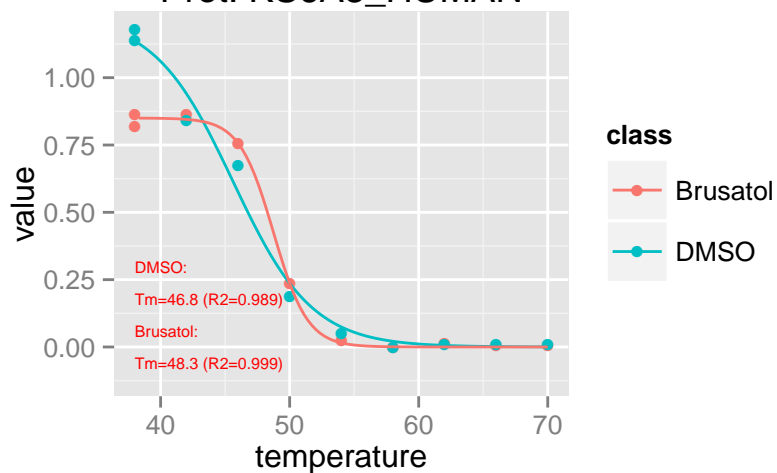

Prot: KS6B1\_HUMAN

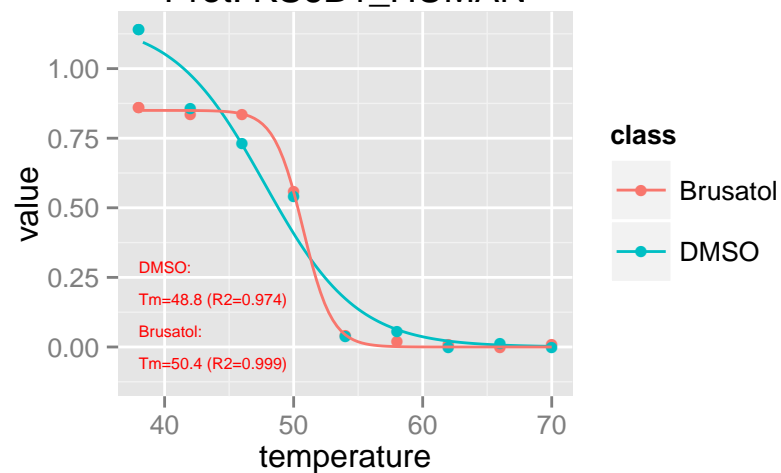

Prot: KT3K\_HUMAN

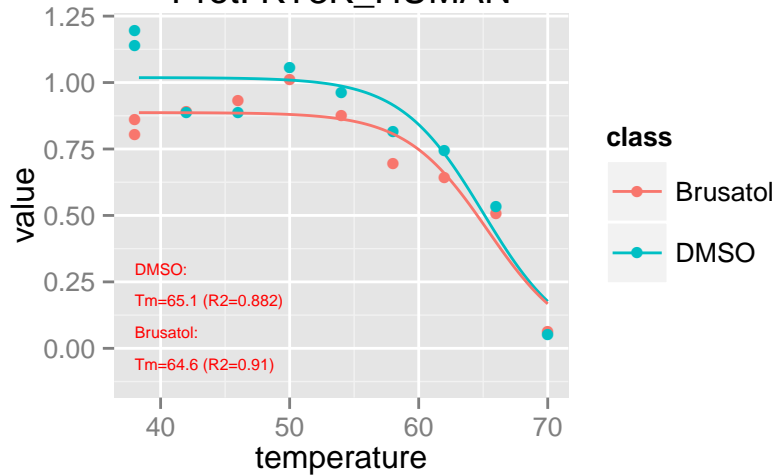

Prot: KTHY\_HUMAN

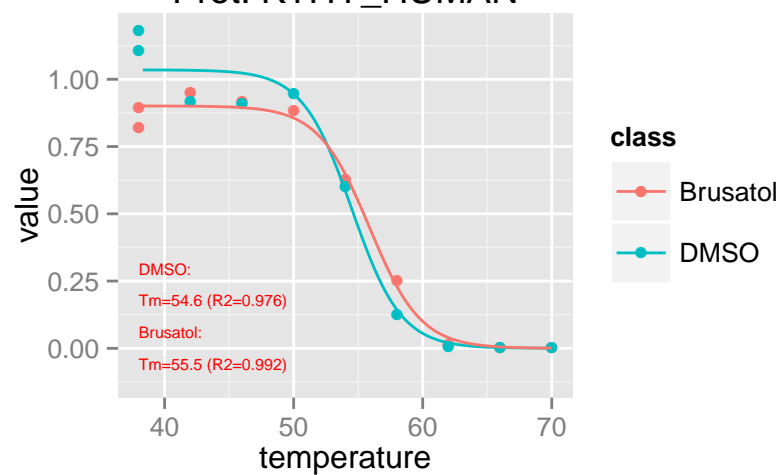

Prot: KTI12\_HUMAN

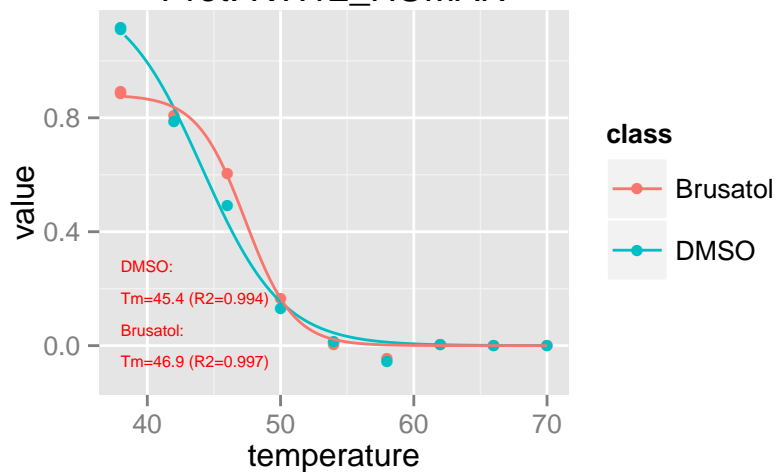

Prot: KTN1\_HUMAN

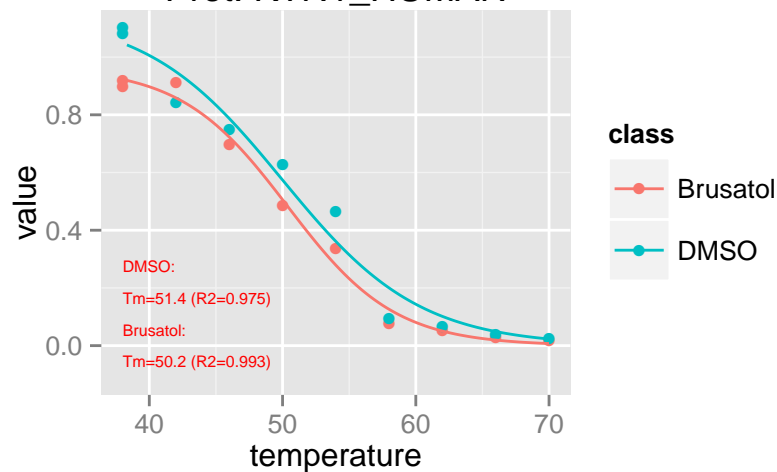

Prot: KTU\_HUMAN

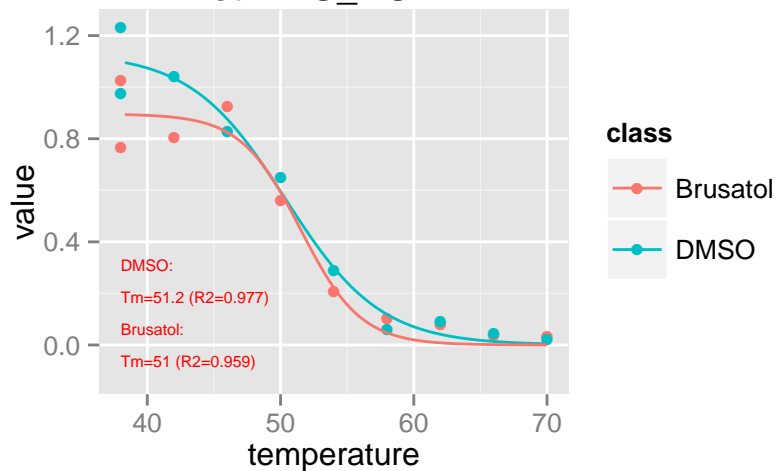

Prot: KYNU\_HUMAN

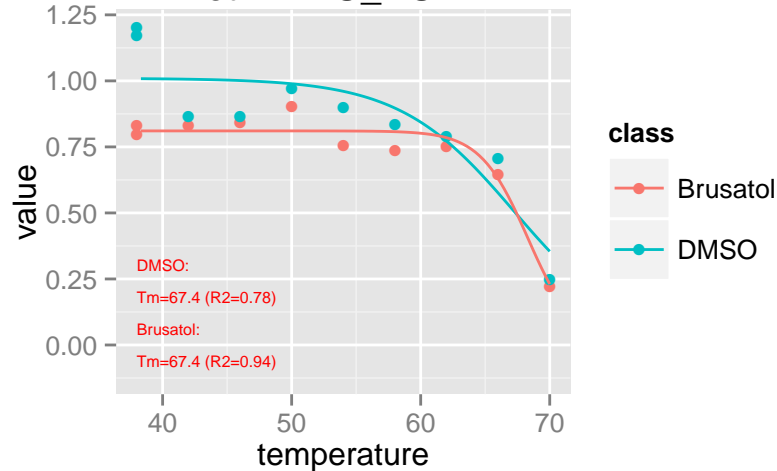

Prot: L10K\_HUMAN

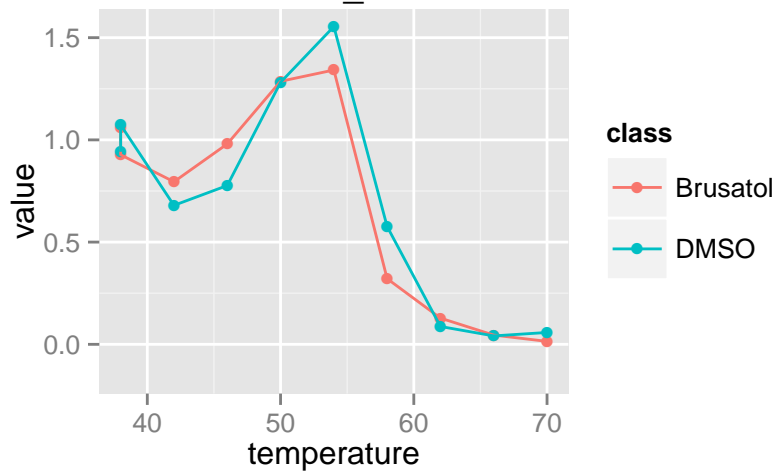

Prot: L12R1\_HUMAN

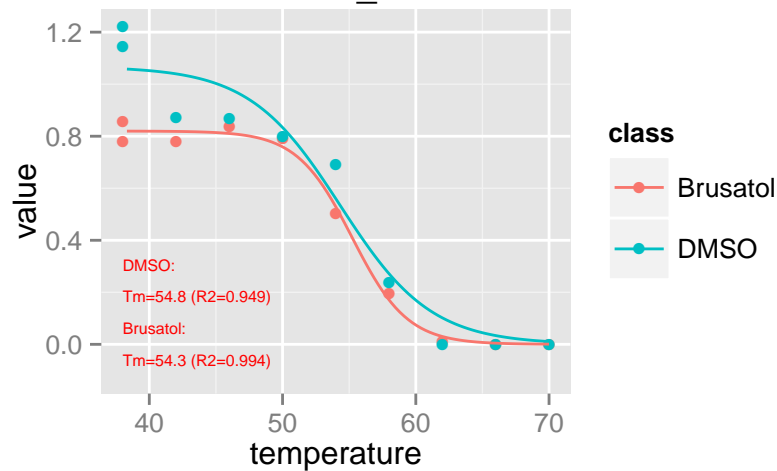

Prot: L2GL1\_HUMAN

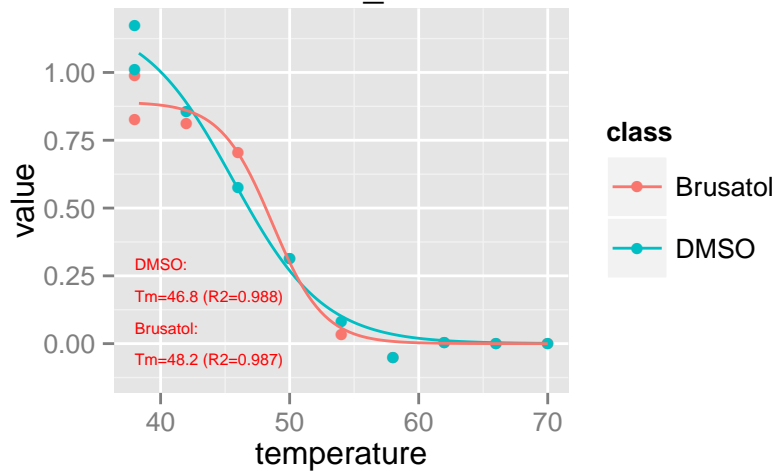

Prot: L2GL2\_HUMAN

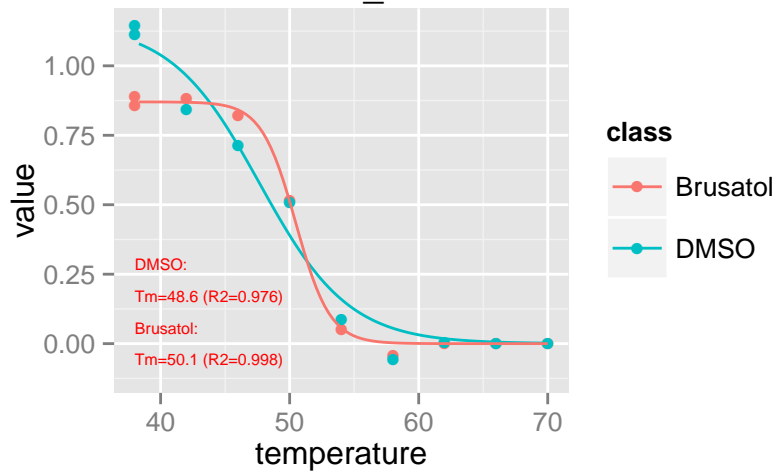

Prot: L2HDH\_HUMAN

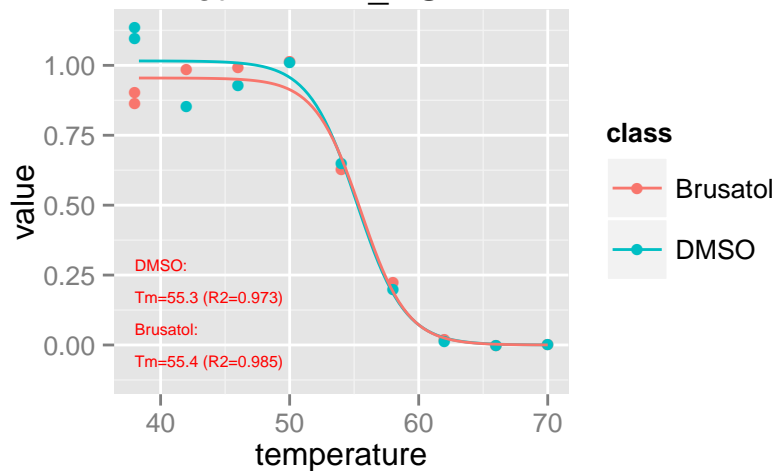

Prot: LA\_HUMAN

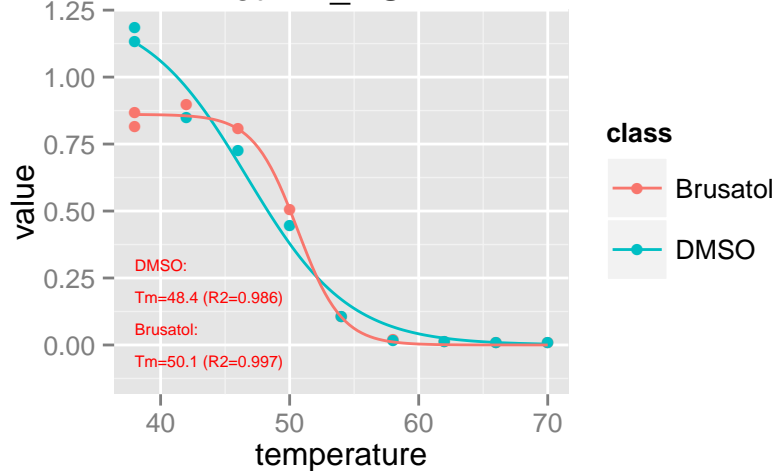

Prot: LACB2\_HUMAN

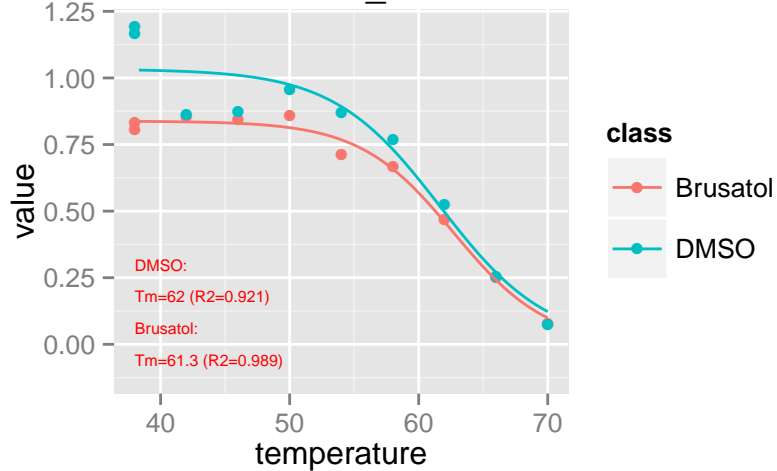

Prot: LAGE3\_HUMAN

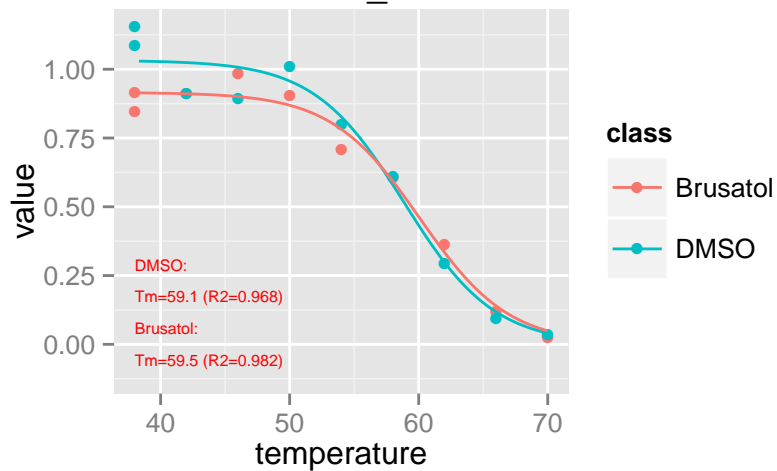



Prot: LAMB1\_HUMAN

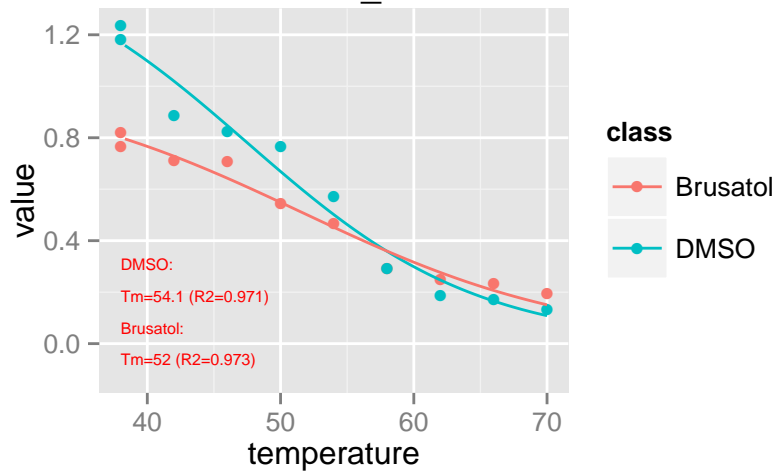

Prot: LAMC1\_HUMAN

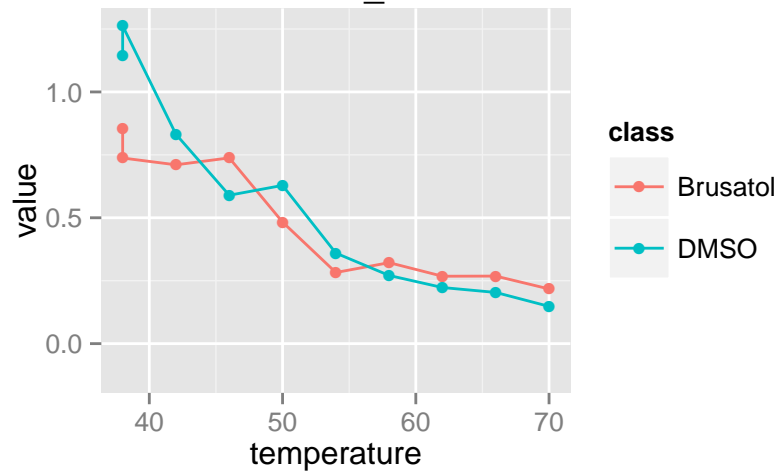

Prot: LAMP1\_HUMAN

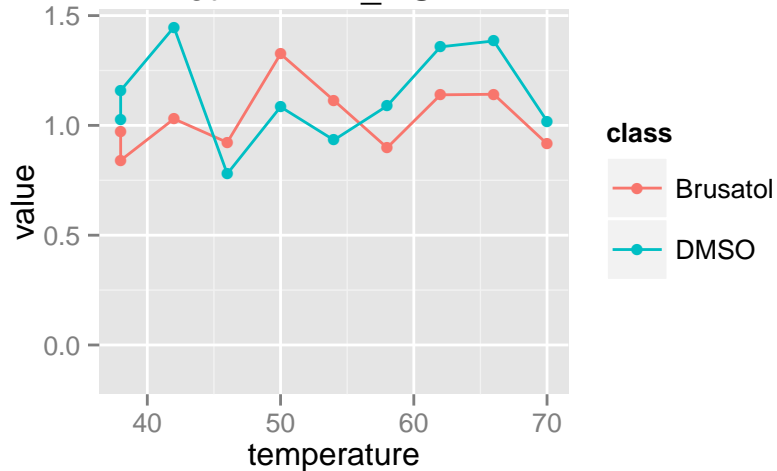

Prot: LAMP2\_HUMAN

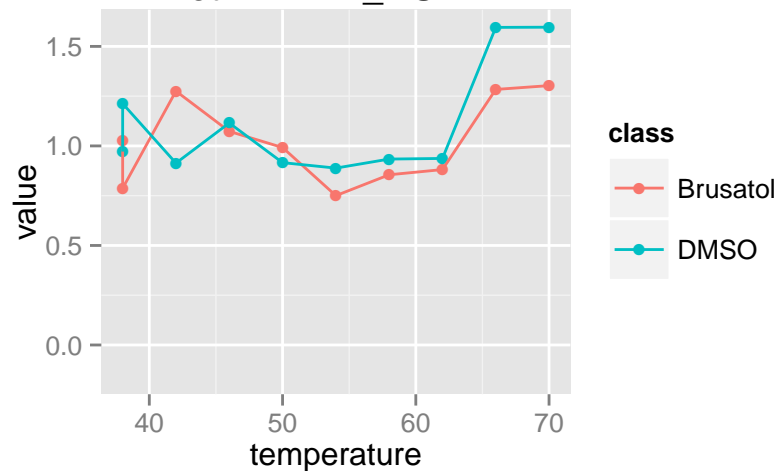

Prot: LANC1\_HUMAN

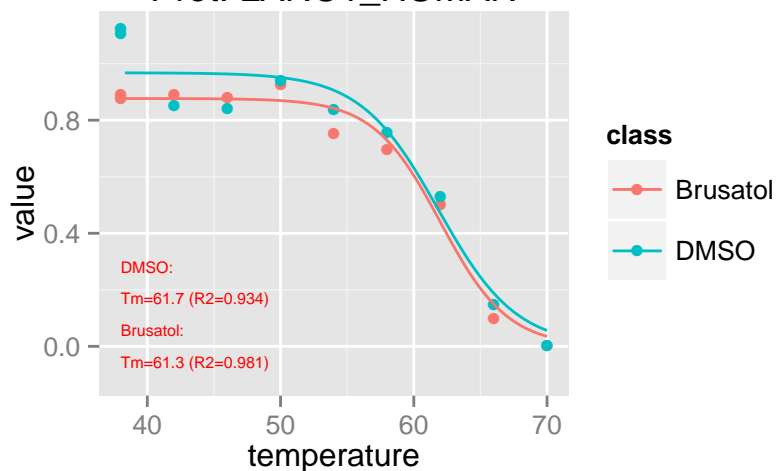

Prot: LANC2\_HUMAN

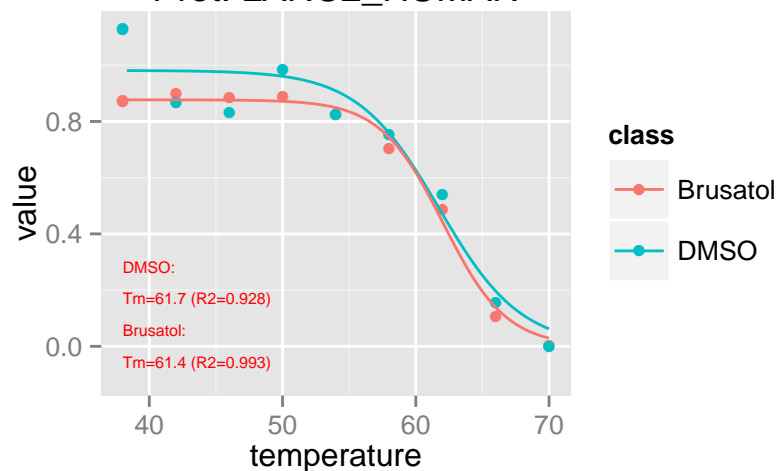

Prot: LAP2\_HUMAN

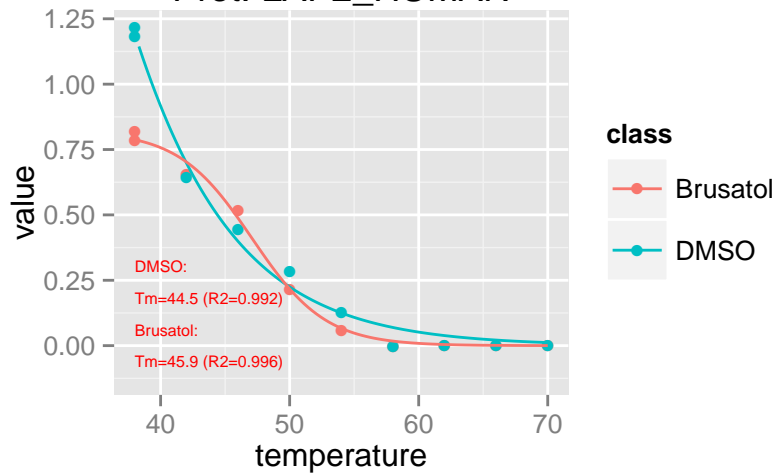

Prot: LAP2A\_HUMAN

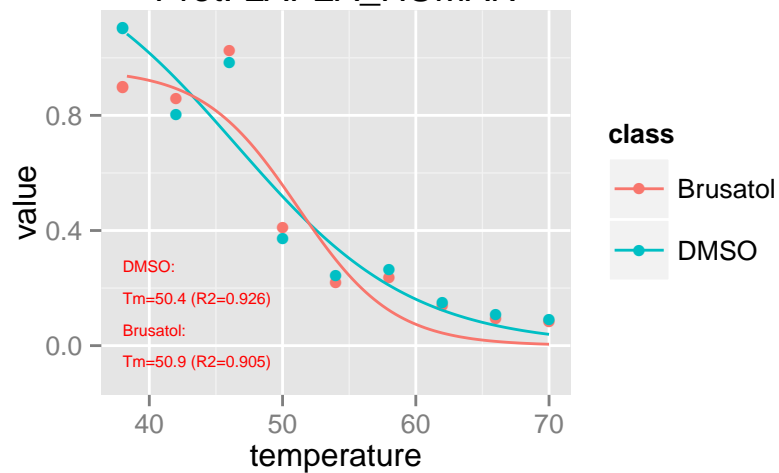

Prot: LAR4B\_HUMAN

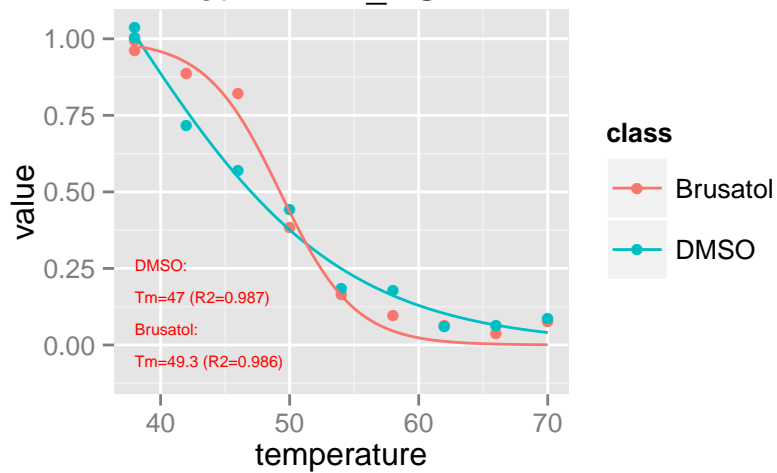

Prot: LARP1\_HUMAN

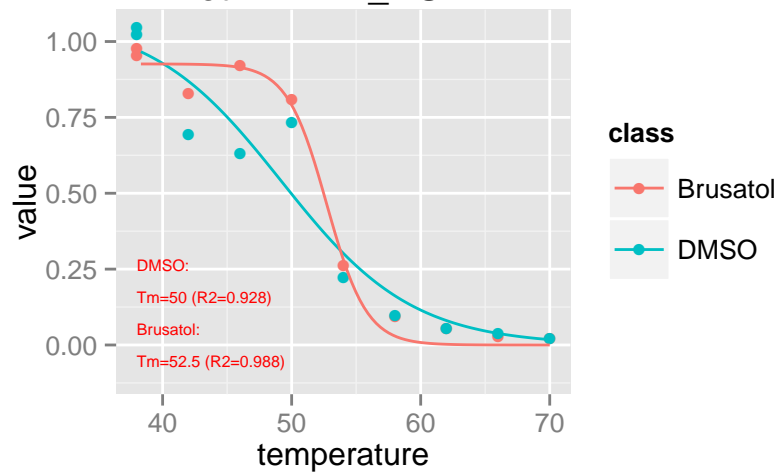

Prot: LARP4\_HUMAN

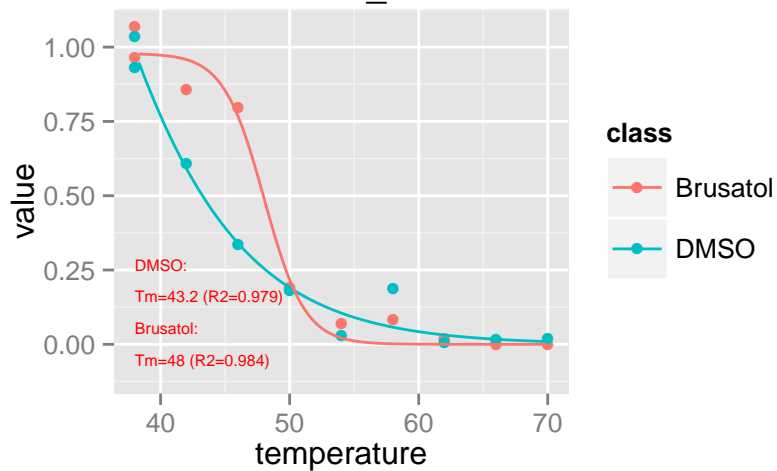

Prot: LAS1L\_HUMAN

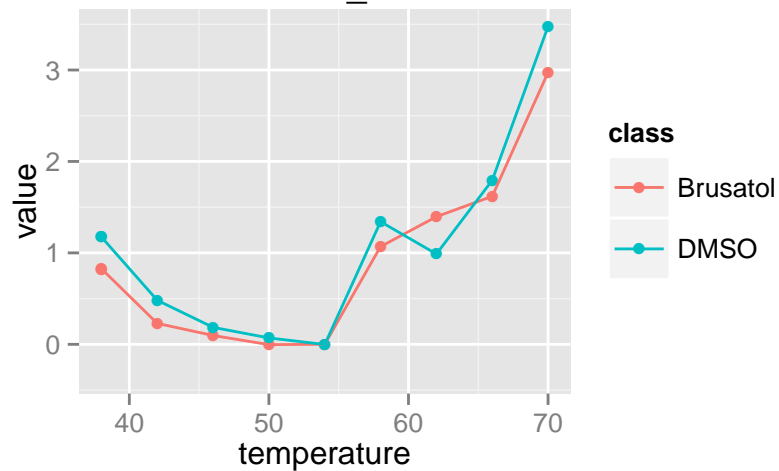

Prot: LASP1\_HUMAN

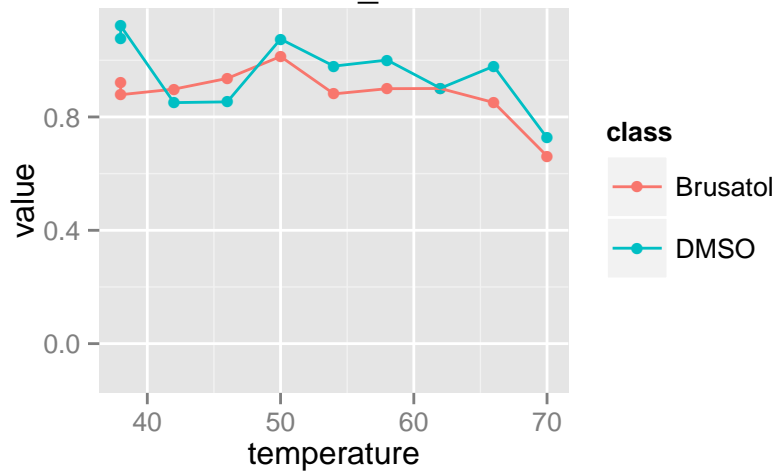

Prot: LAT1\_HUMAN

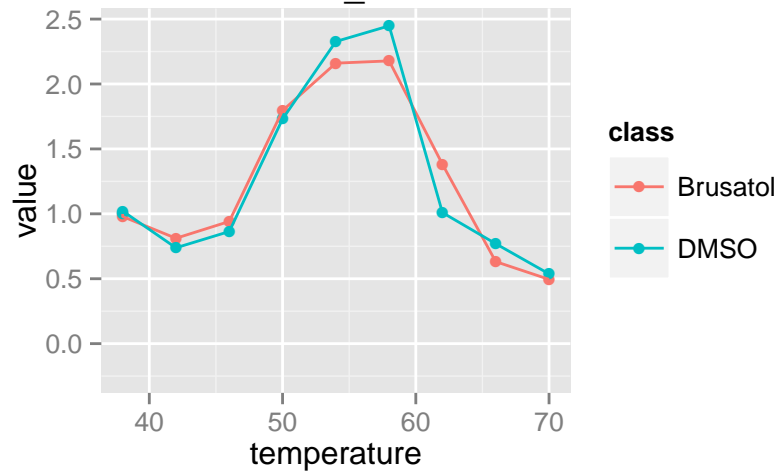

Prot: LBH\_HUMAN

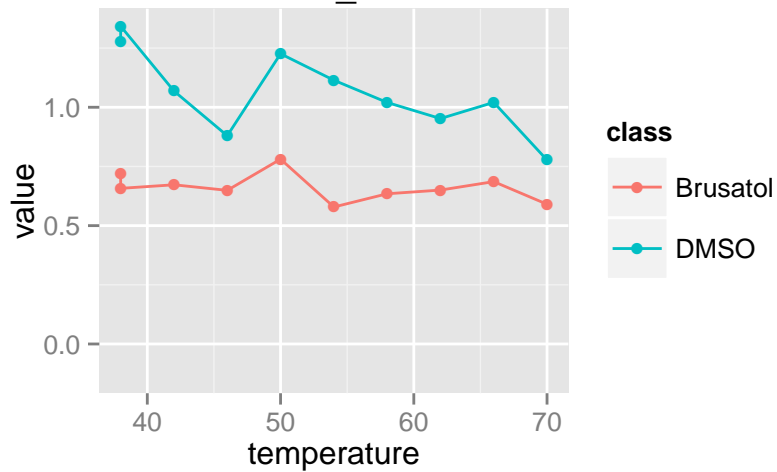

Prot: LBR\_HUMAN

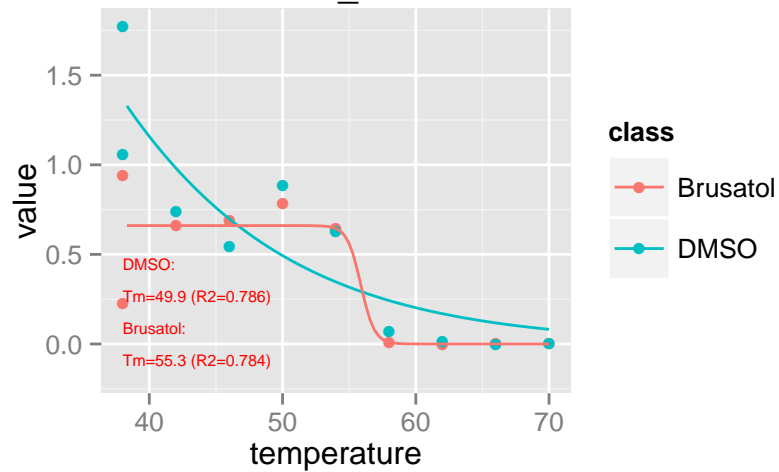

Prot: LC7L2\_HUMAN

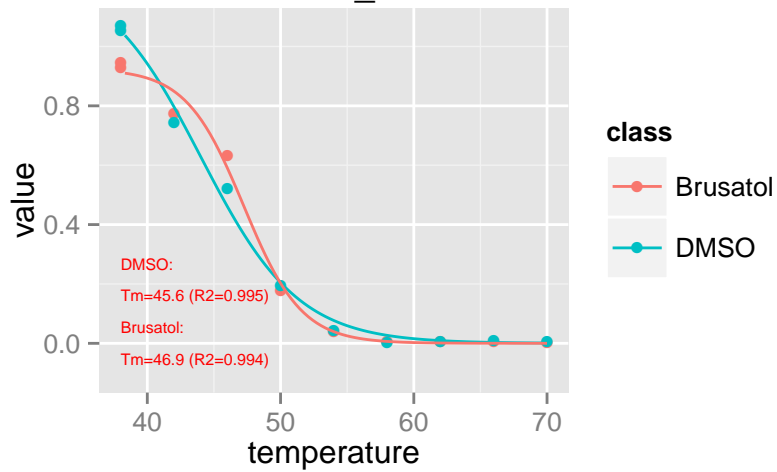

Prot: LC7L3\_HUMAN

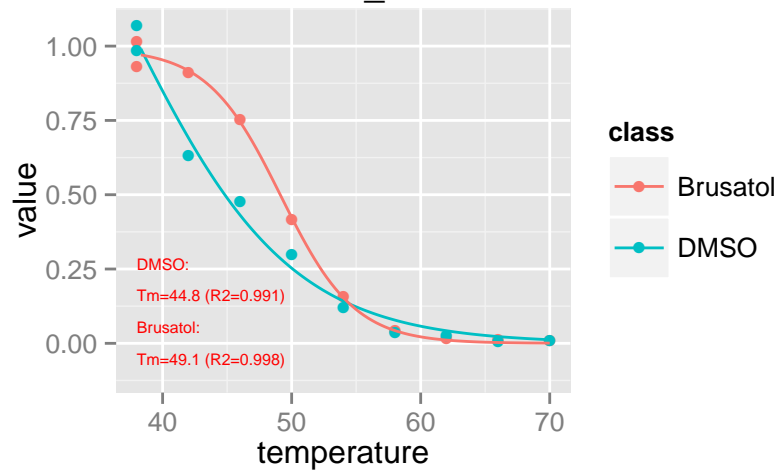

Prot: LCMT1\_HUMAN

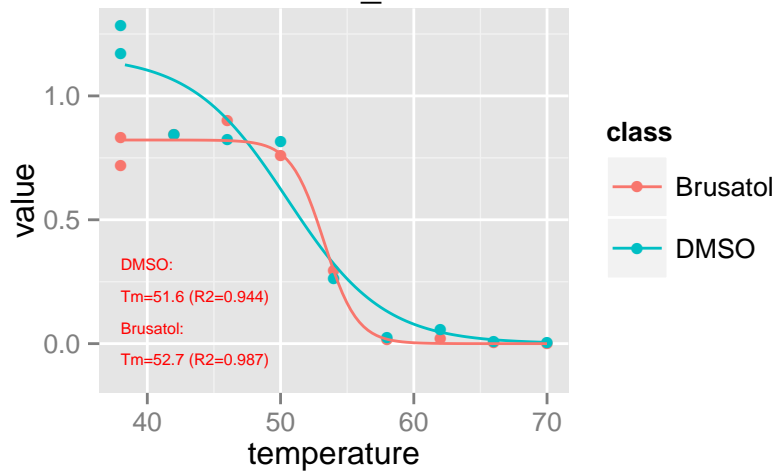

Prot: LDH6A\_HUMAN

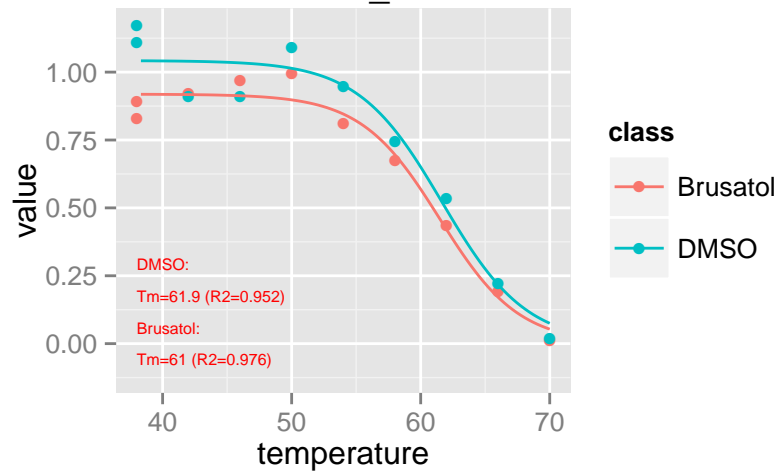

Prot: LDHA\_HUMAN

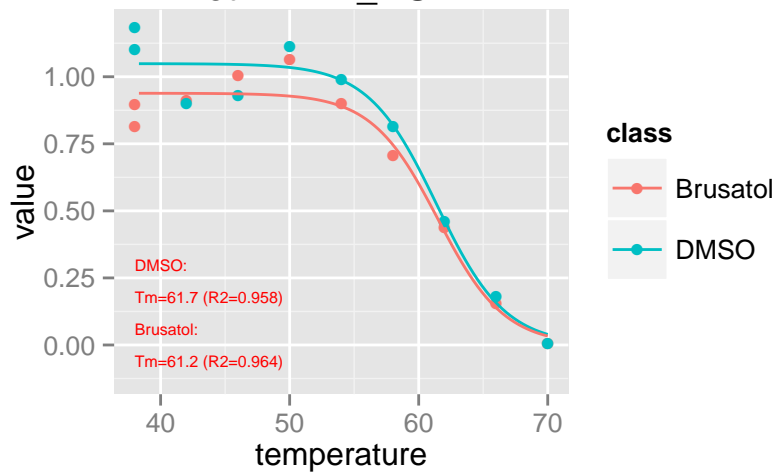

Prot: LDHB\_HUMAN

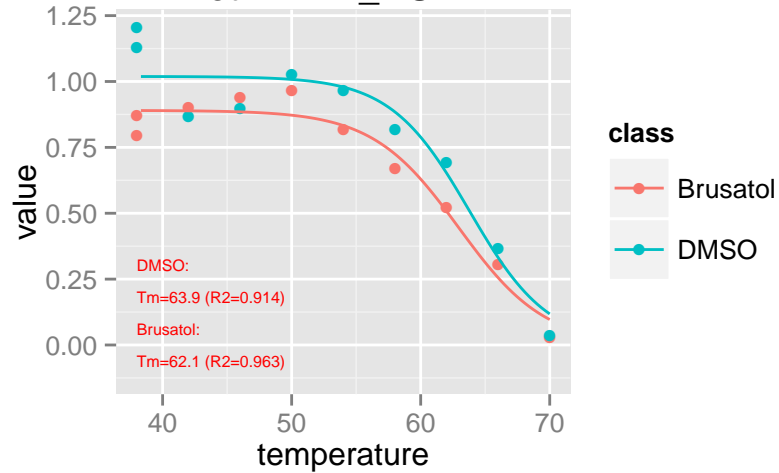

Prot: LEG1\_HUMAN

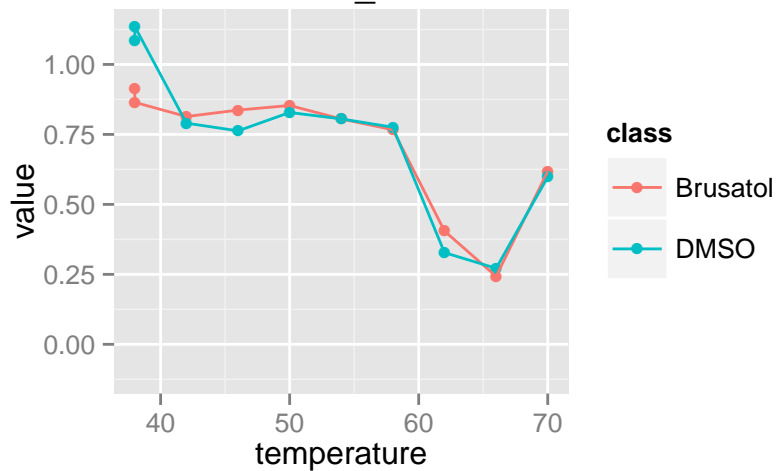

Prot: LEG3\_HUMAN

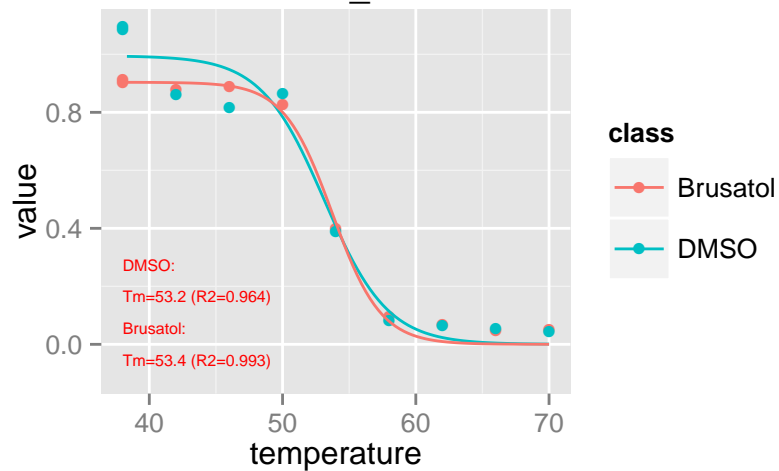

Prot: LEGL\_HUMAN

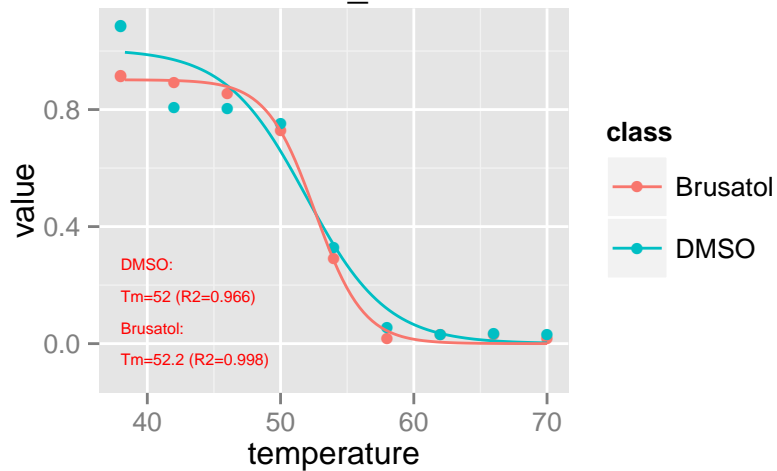

Prot: LEO1\_HUMAN

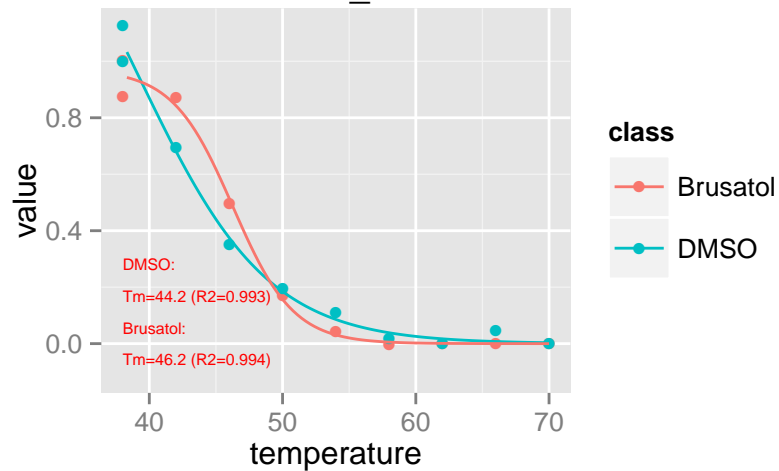

Prot: LG3BP\_HUMAN

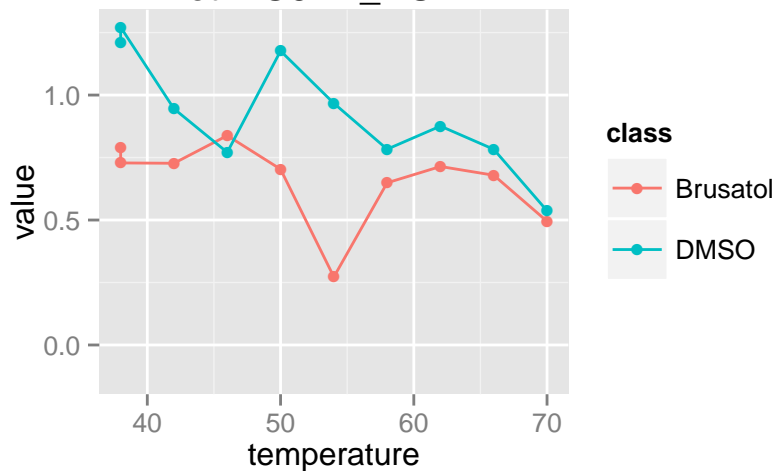

Prot: LGMN\_HUMAN

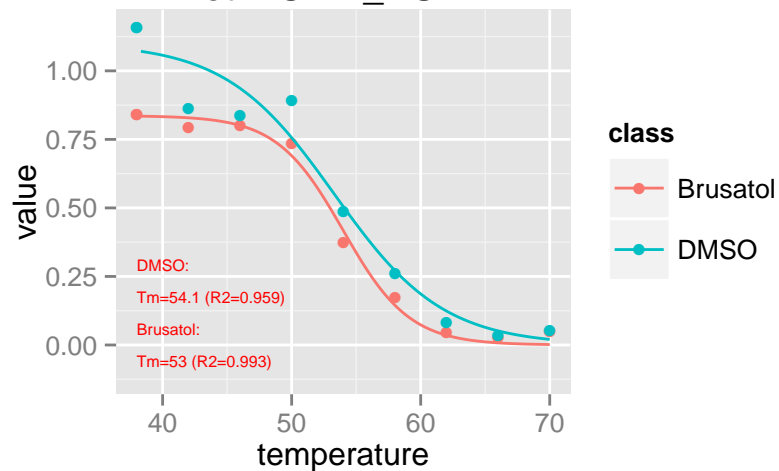

Prot: LGUL\_HUMAN

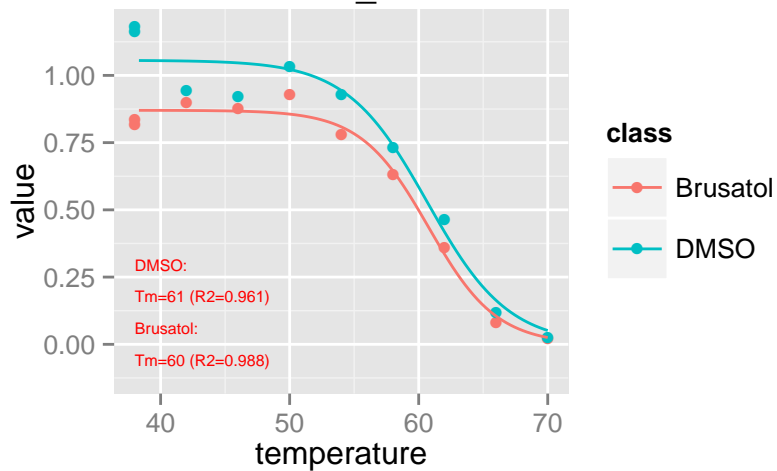

Prot: LHPP\_HUMAN

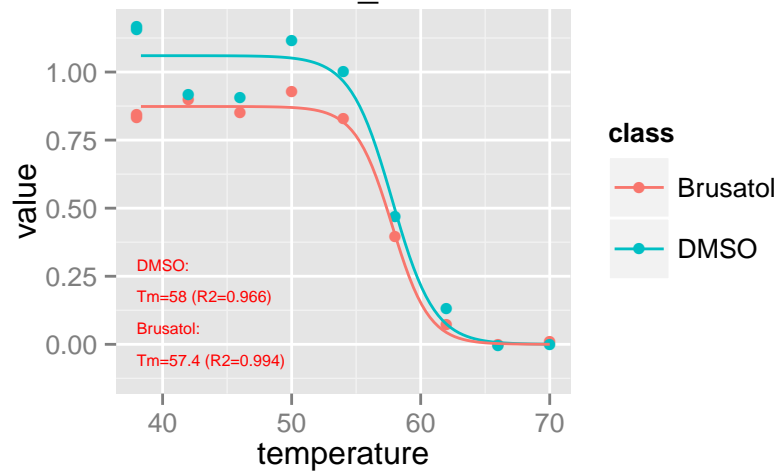

Prot: LICH\_HUMAN

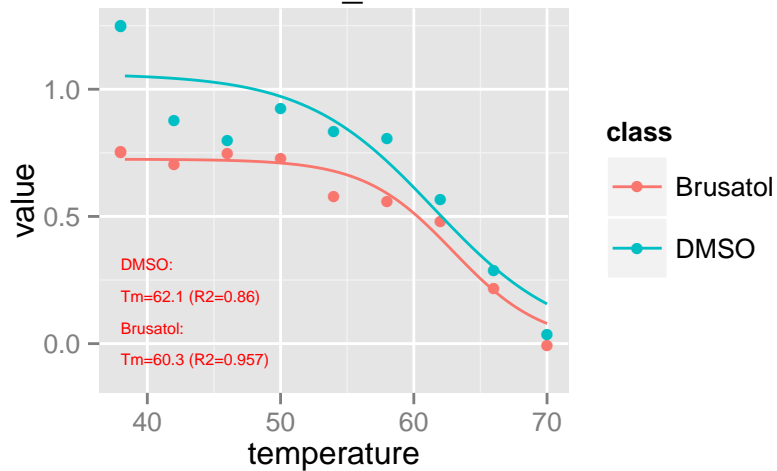

Prot: LIMC1\_HUMAN

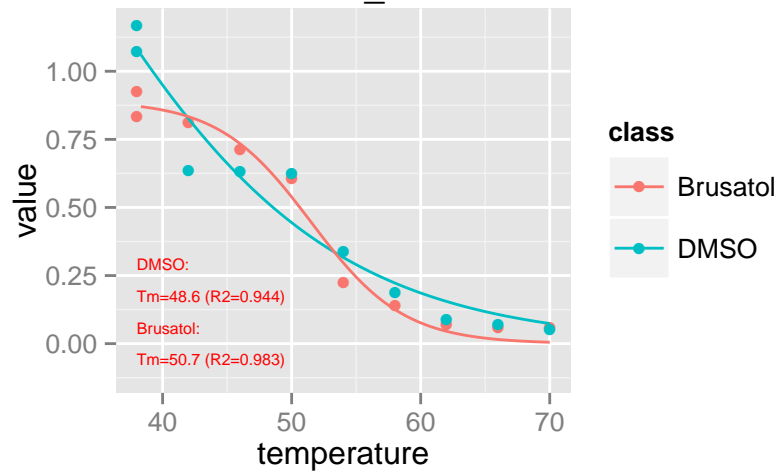

Prot: LIMD1\_HUMAN

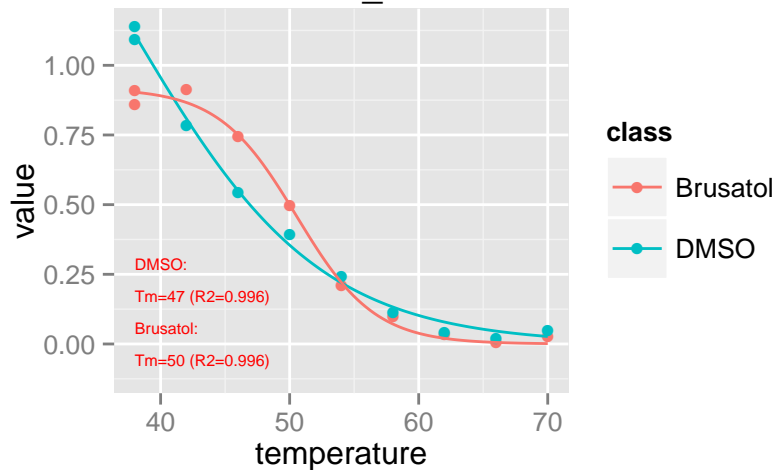

Prot: LIMS1\_HUMAN

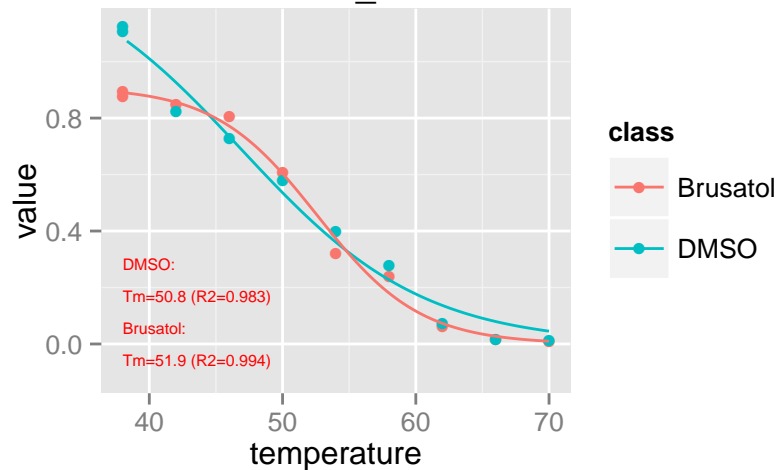

Prot: LIN7A\_HUMAN

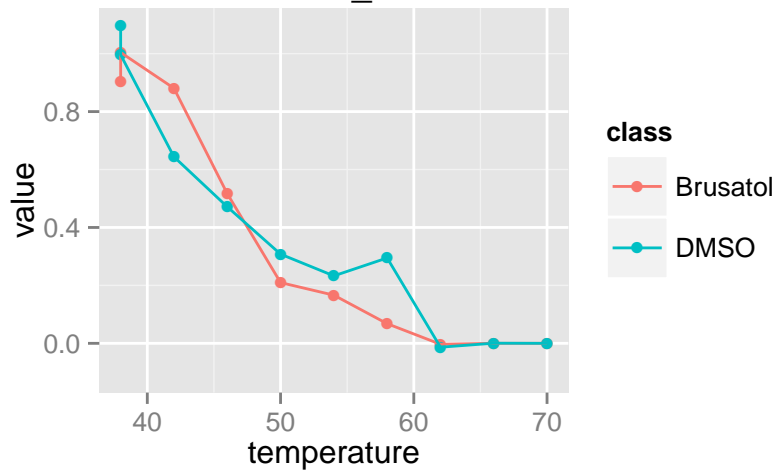

Prot: LIN7C\_HUMAN

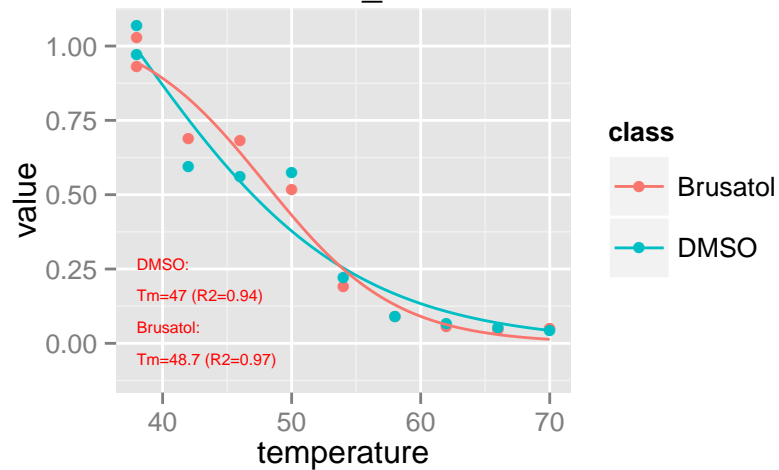

Prot: LIPA1\_HUMAN

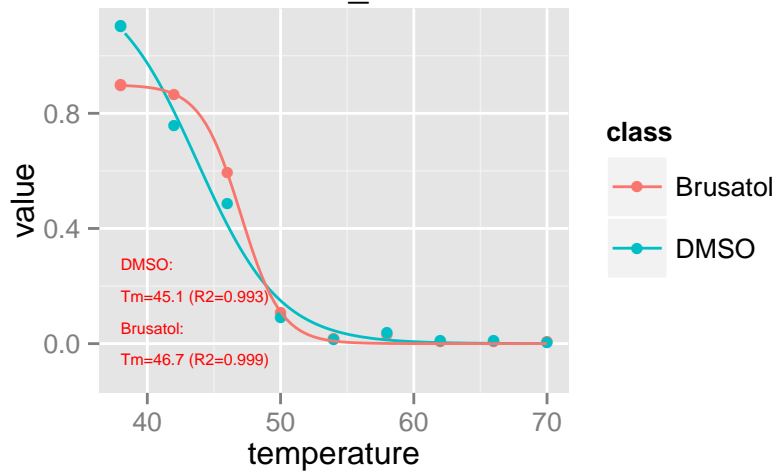

Prot: LIPB1\_HUMAN

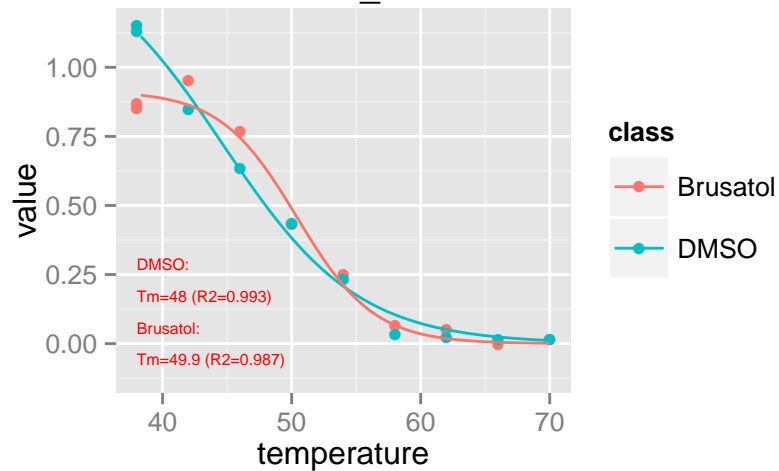

Prot: LIPB2\_HUMAN

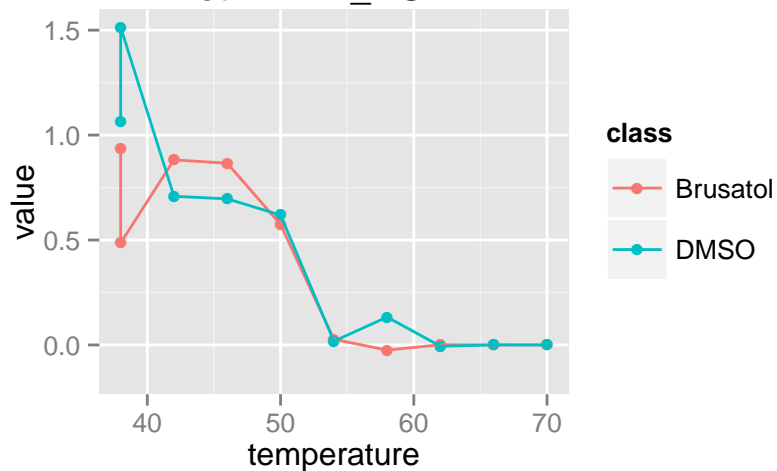

Prot: LIS1\_HUMAN

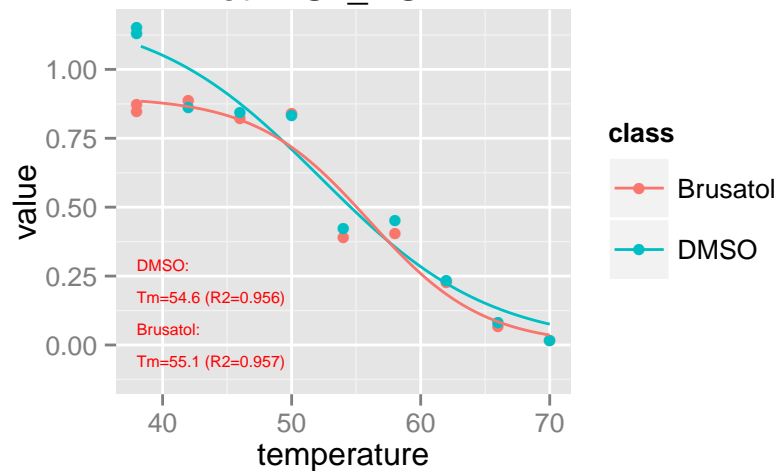

Prot: LKHA4\_HUMAN

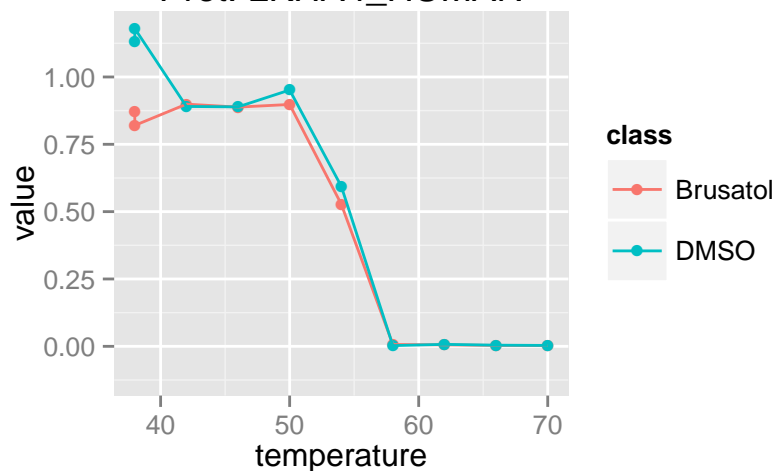

Prot: LMCD1\_HUMAN

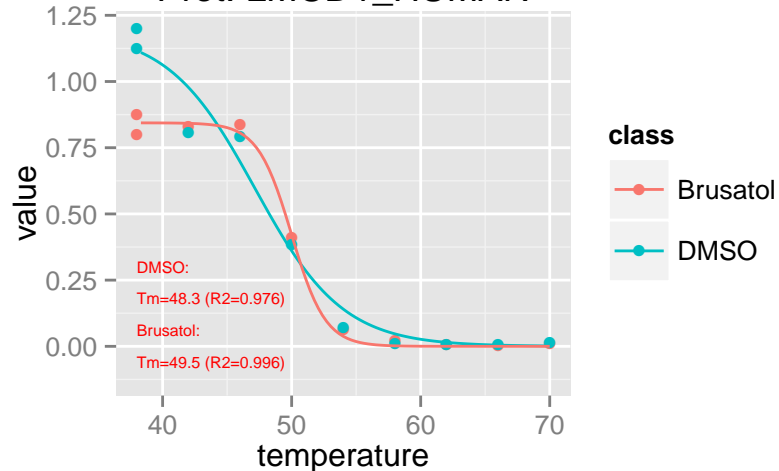

Prot: LMNA\_HUMAN

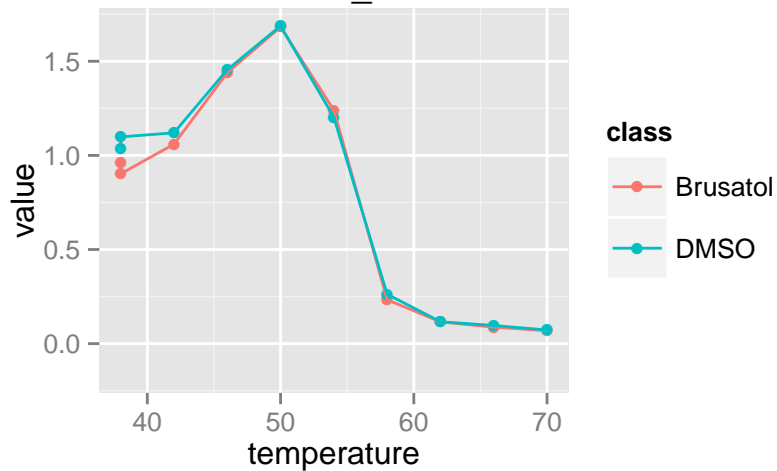

Prot: LMNB1\_HUMAN

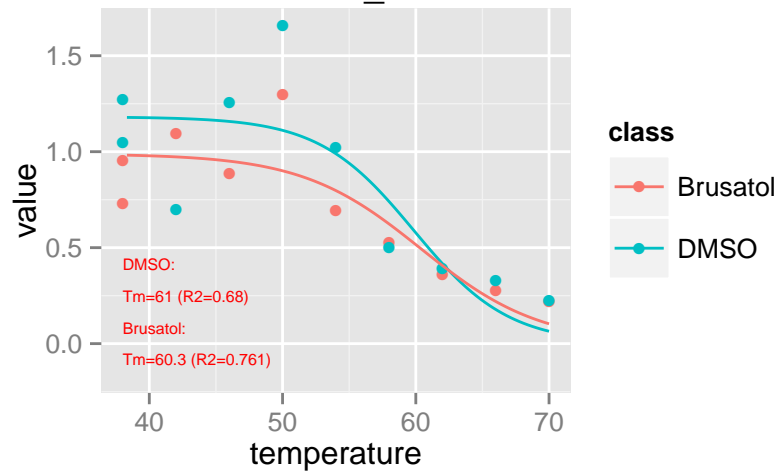

Prot: LONM\_HUMAN

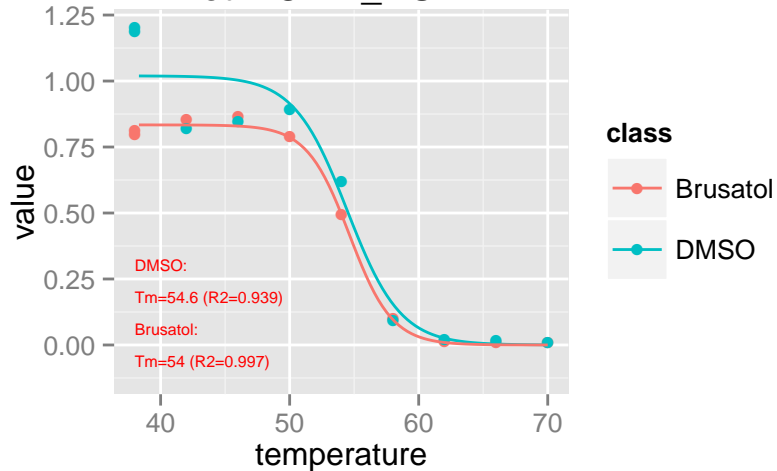

Prot: LPP\_HUMAN

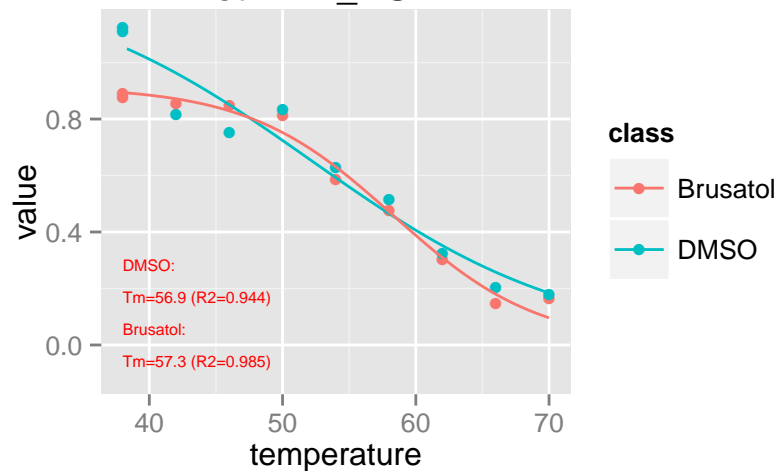

Prot: LPPRC\_HUMAN

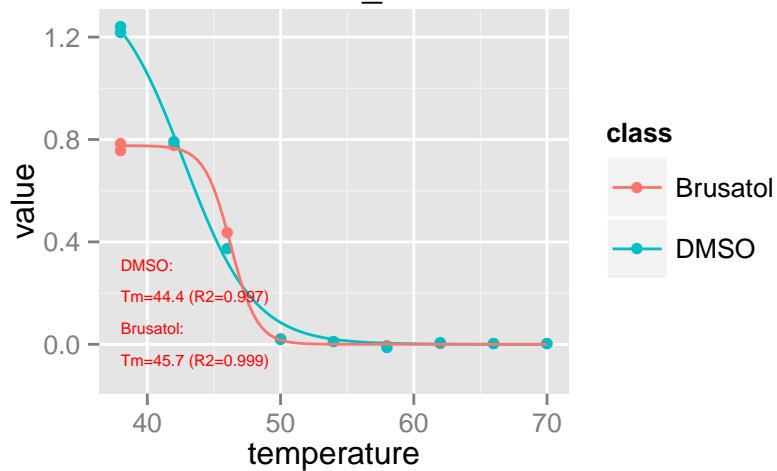

Prot: LR16A\_HUMAN

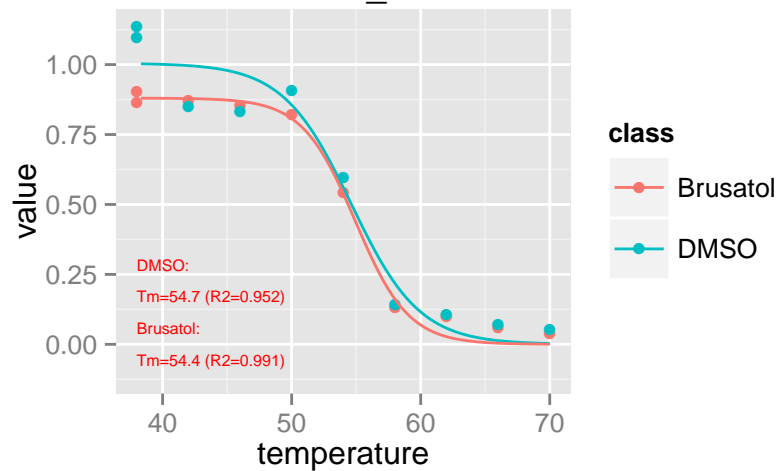



Prot: LRBA\_HUMAN

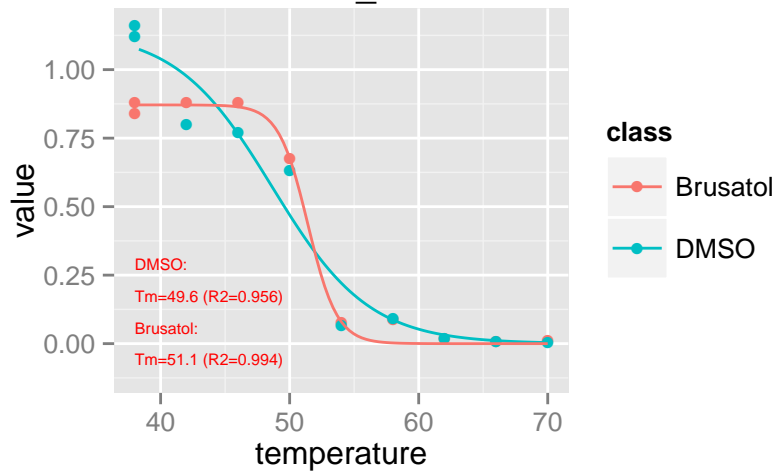

Prot: LRC14\_HUMAN

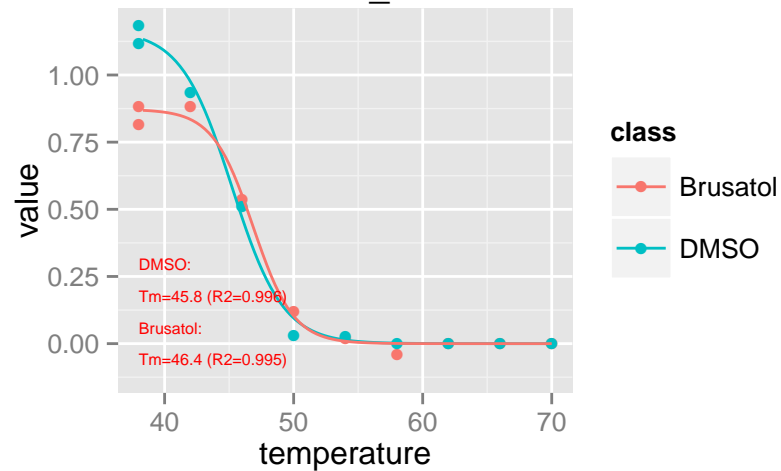

Prot: LRC20\_HUMAN

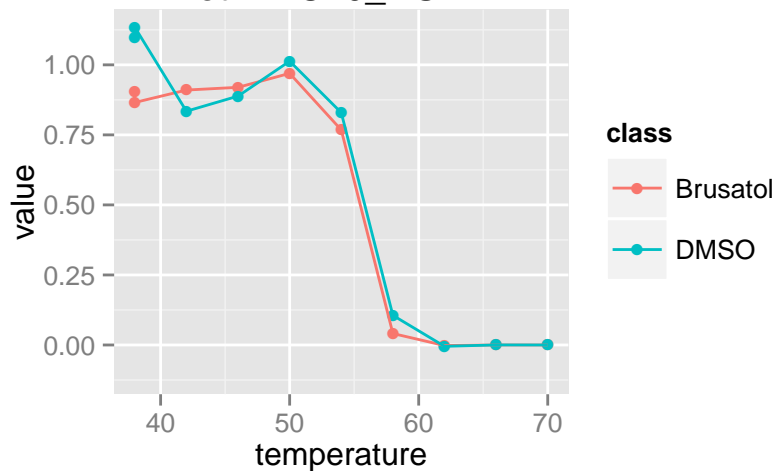

Prot: LRC40\_HUMAN

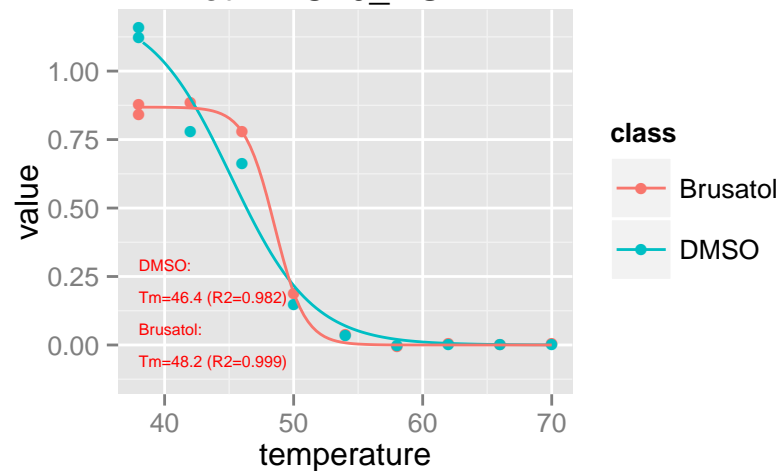

Prot: LRC41\_HUMAN

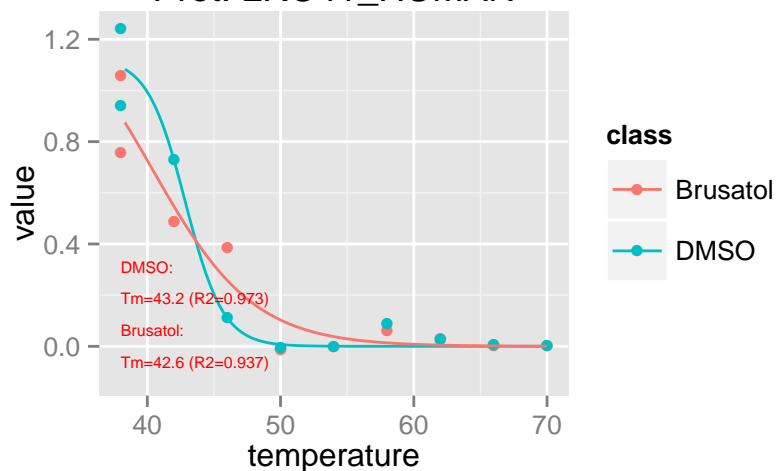

Prot: LRC47\_HUMAN

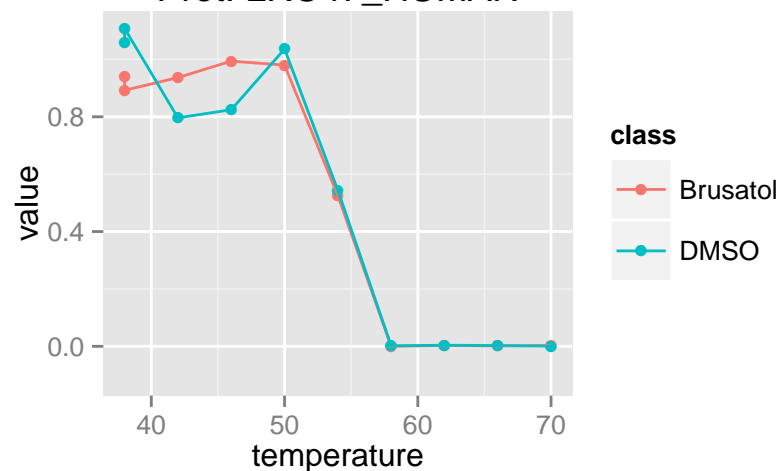

Prot: LRC57\_HUMAN

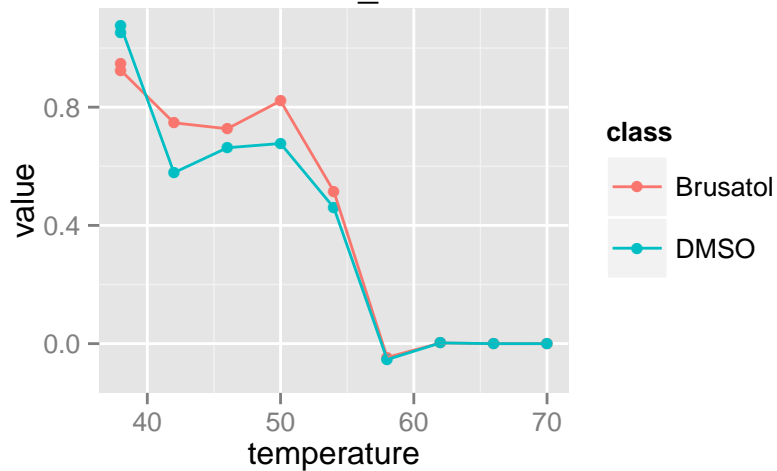

Prot: LRC59\_HUMAN

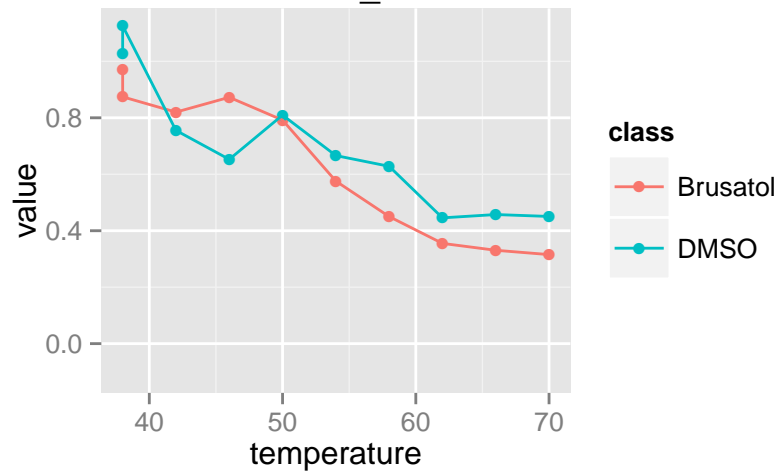

Prot: LRRF1\_HUMAN

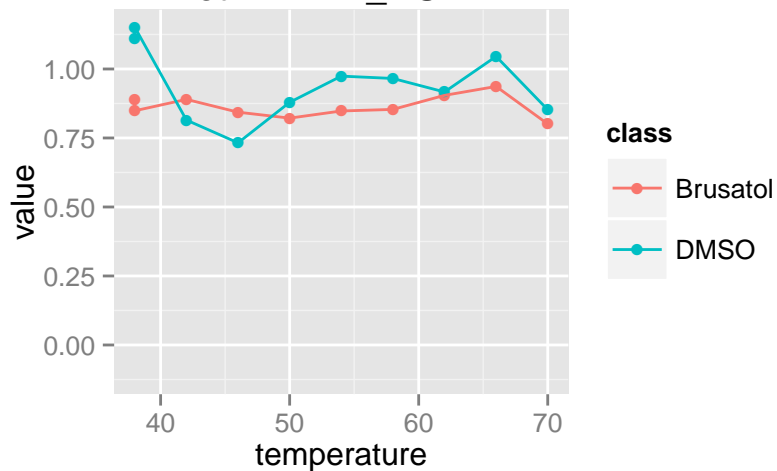

Prot: LRRF2\_HUMAN

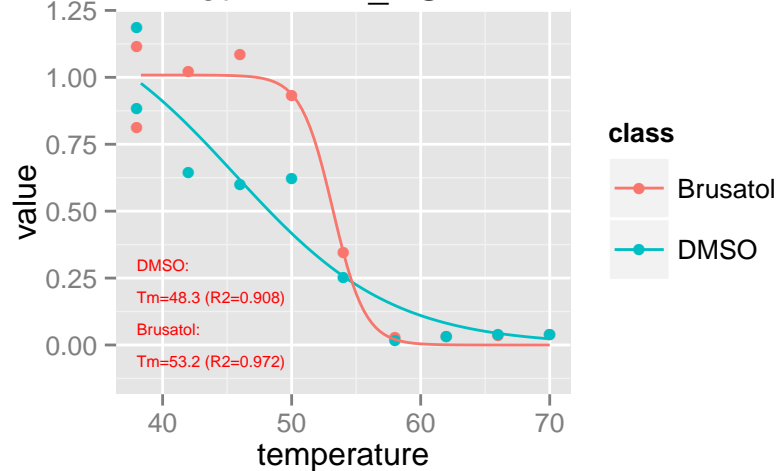

Prot: LRSM1\_HUMAN

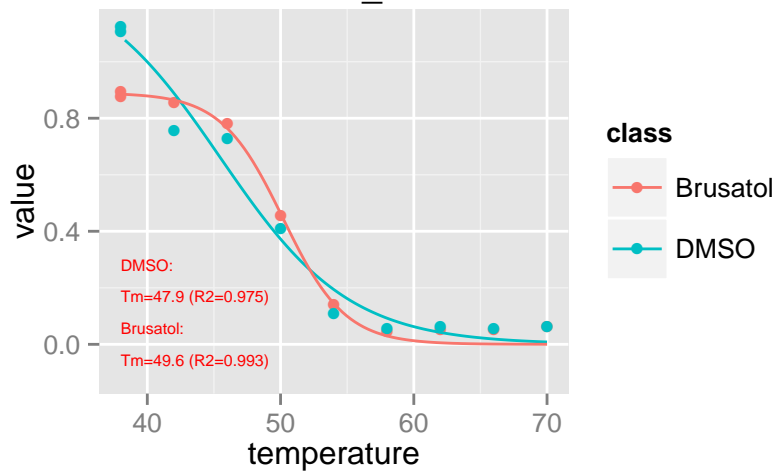

Prot: LRWD1\_HUMAN

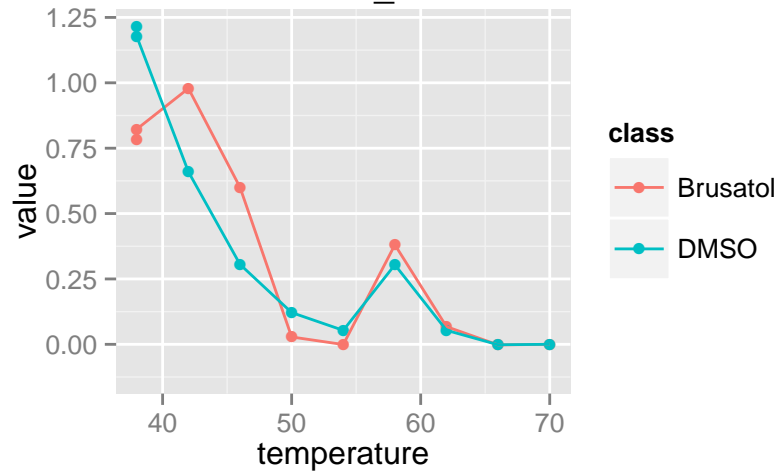

Prot: LS14A\_HUMAN

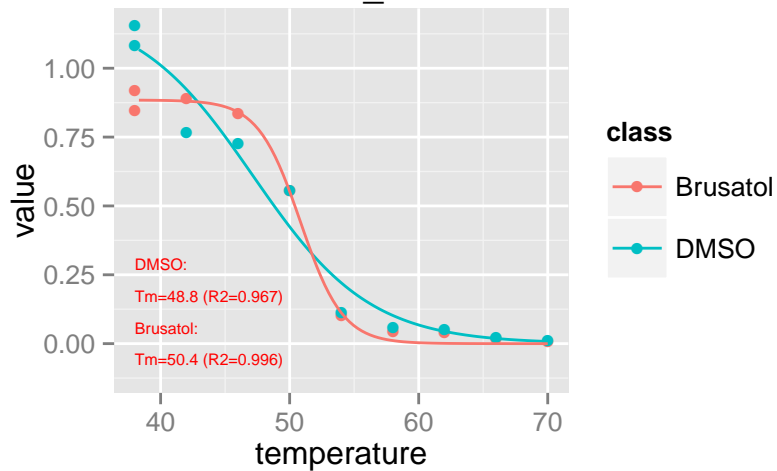

Prot: LSM1\_HUMAN

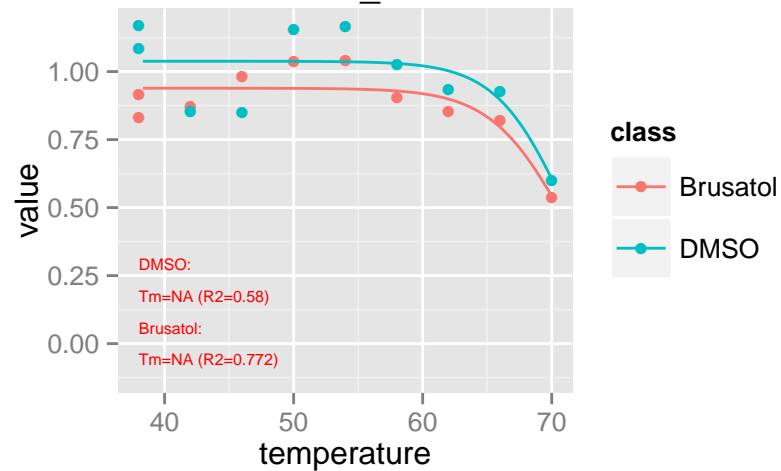

Prot: LSM12\_HUMAN

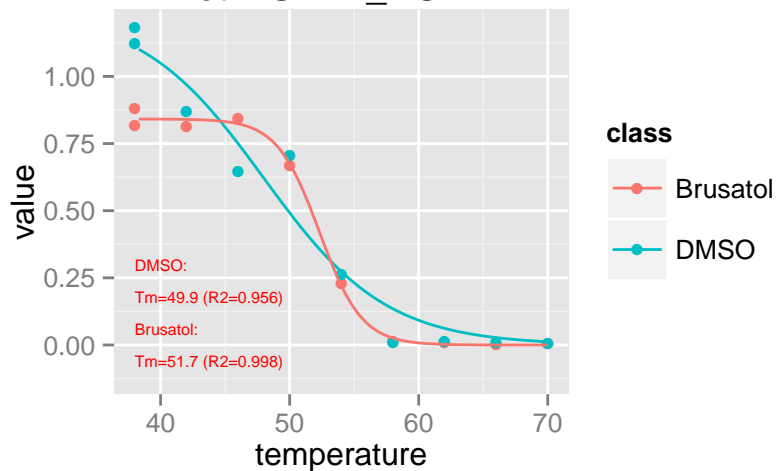

Prot: LSM2\_HUMAN

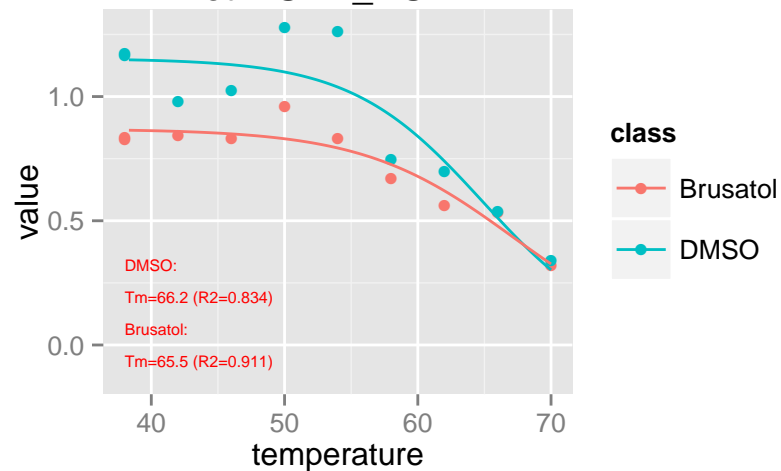

Prot: LSM3\_HUMAN

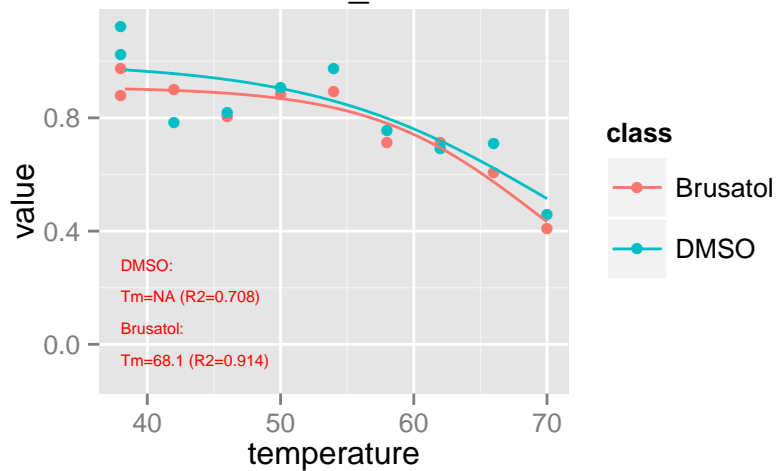

Prot: LSM4\_HUMAN

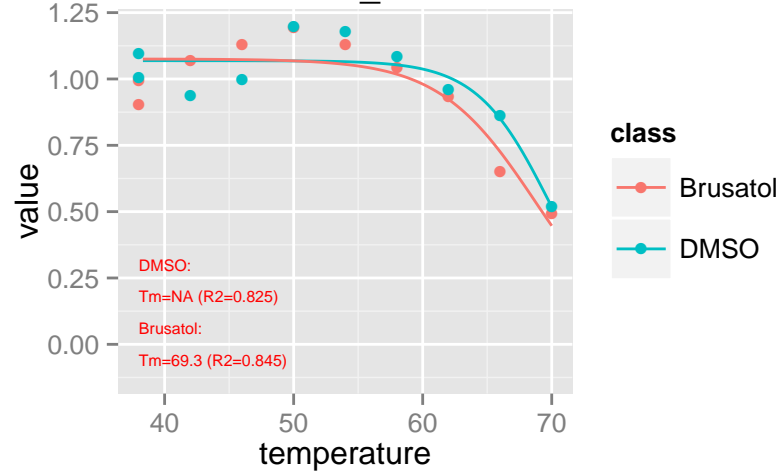

Prot: LSM6\_HUMAN

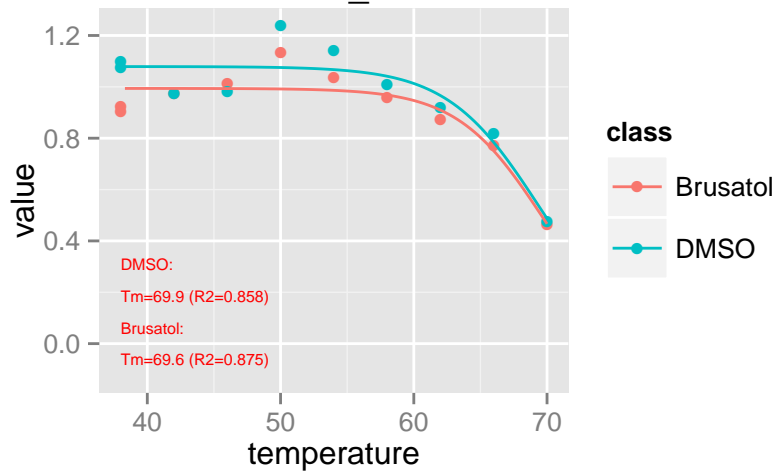

Prot: LSM7\_HUMAN

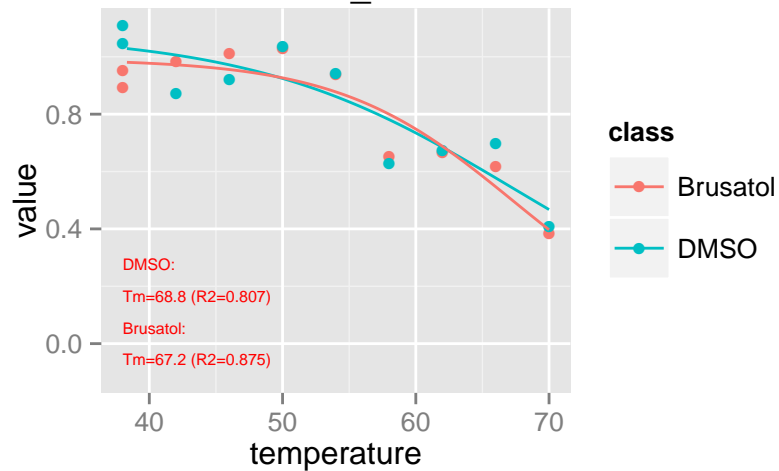

Prot: LST8\_HUMAN

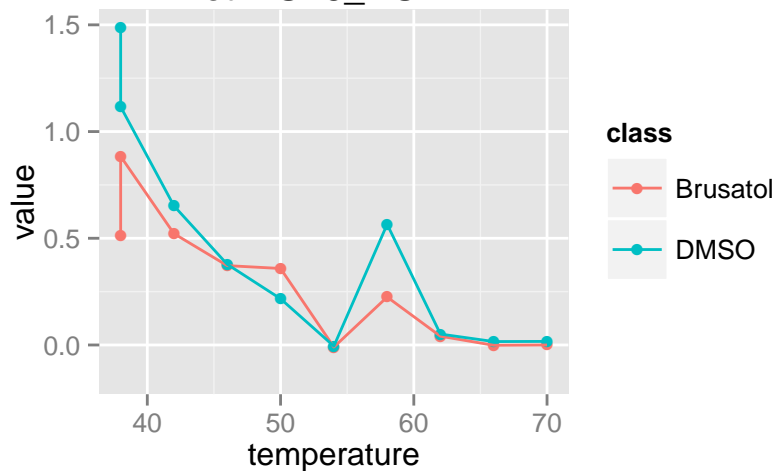

Prot: LTN1\_HUMAN

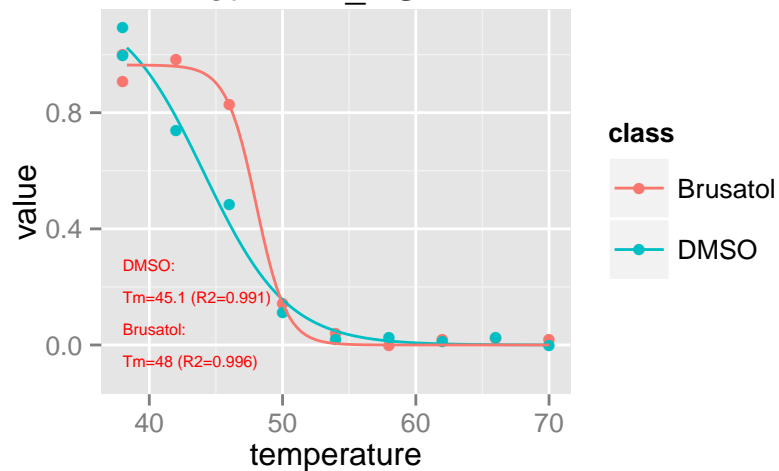

Prot: LTV1\_HUMAN

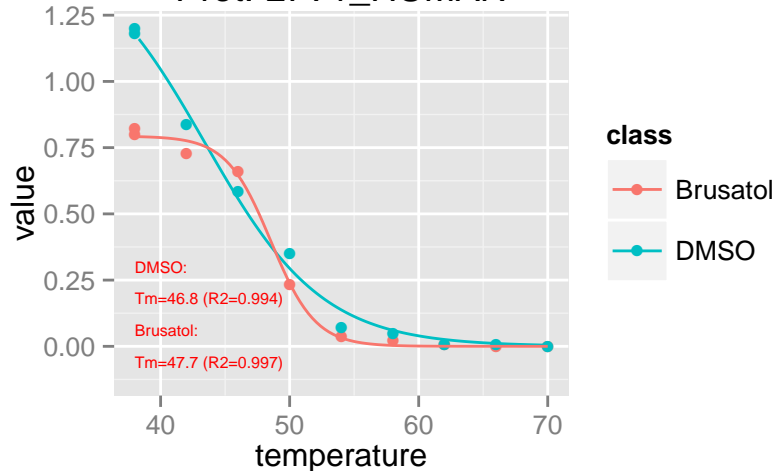

Prot: LUC7L\_HUMAN

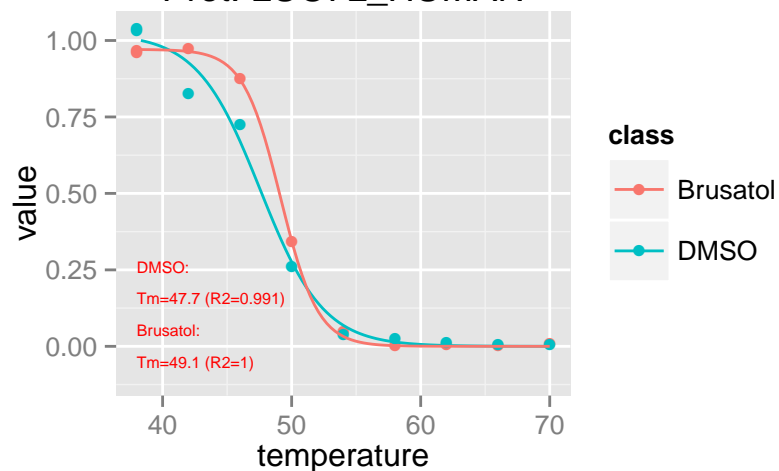

Prot: LUZP1\_HUMAN

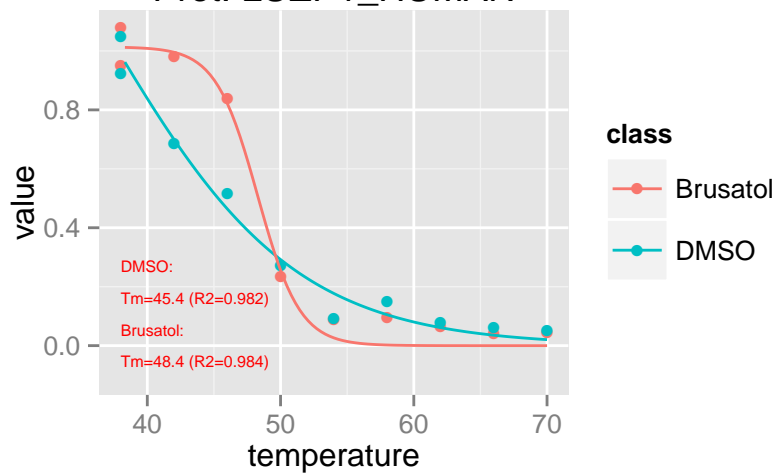

Prot: LXN\_HUMAN

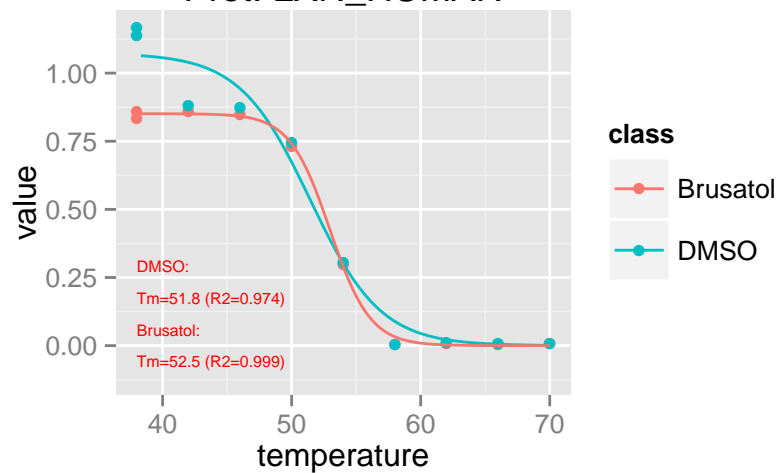

Prot: LY10L\_HUMAN

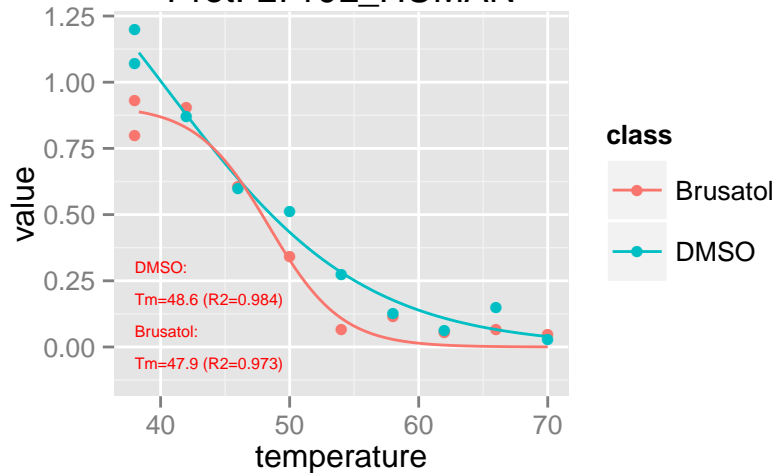

Prot: LYAG\_HUMAN

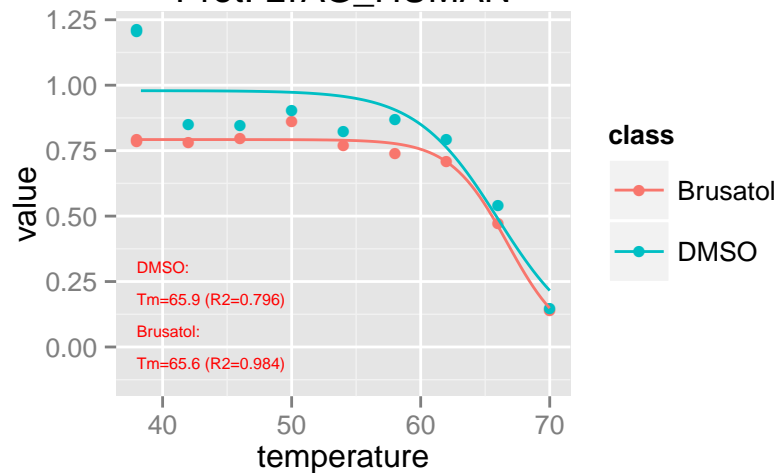

Prot: LYAR\_HUMAN

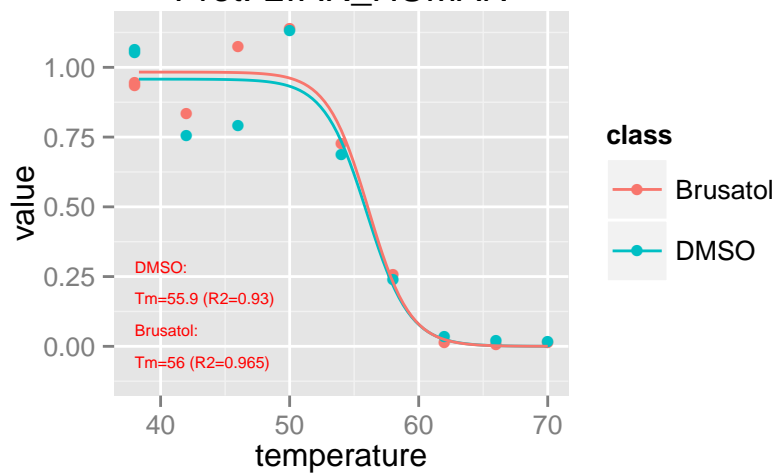

Prot: LYPA1\_HUMAN

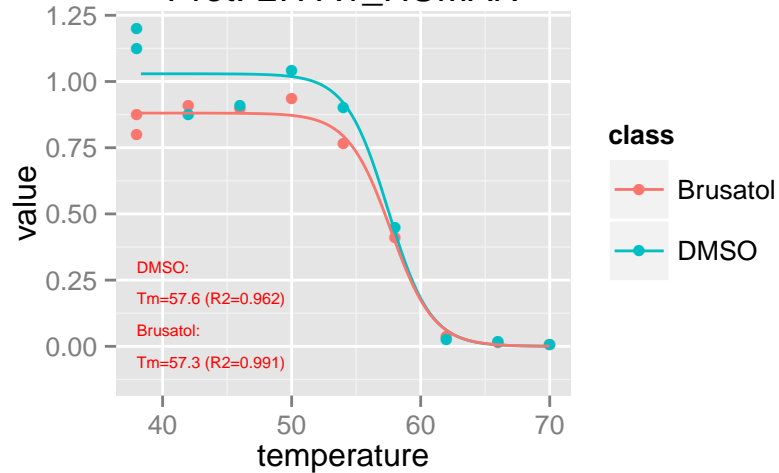

Prot: LYPA2\_HUMAN

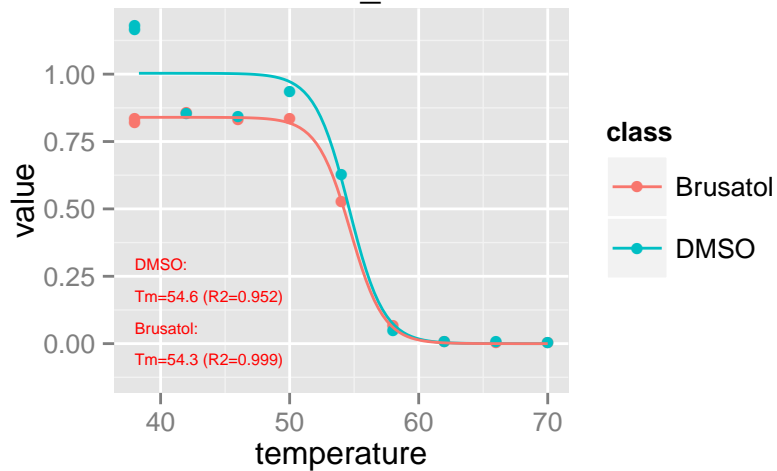

Prot: LYPL1\_HUMAN

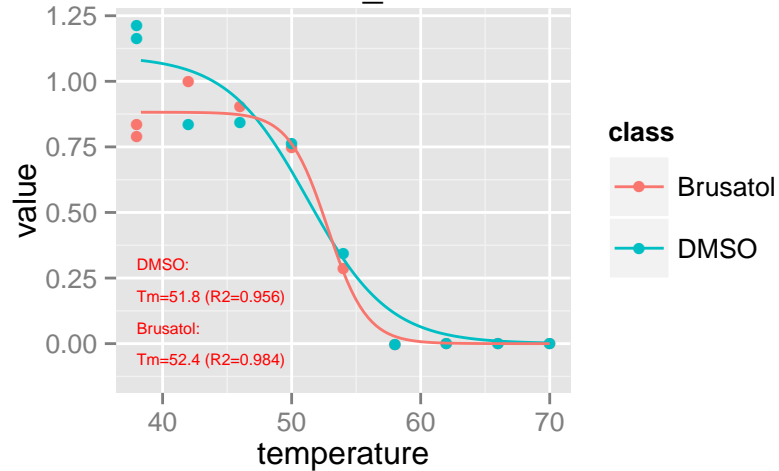

Prot: LYRIC\_HUMAN

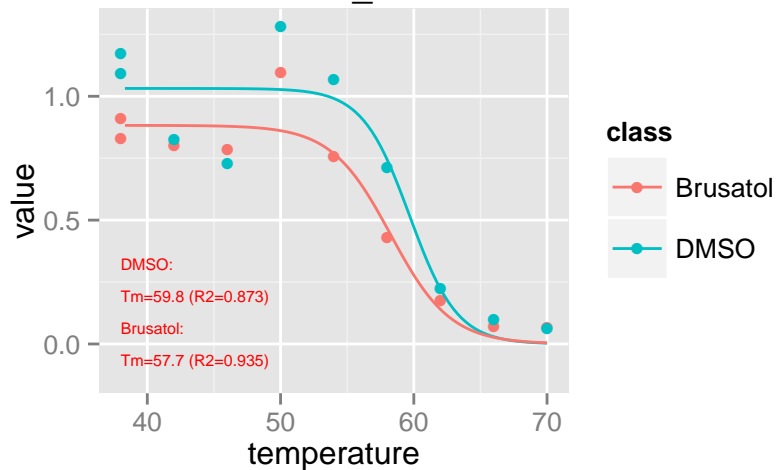

Prot: LZIC\_HUMAN

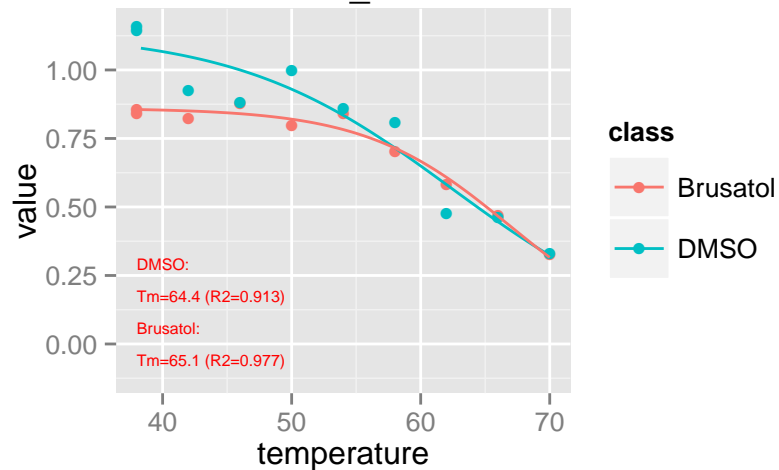

Prot: LZTL1\_HUMAN

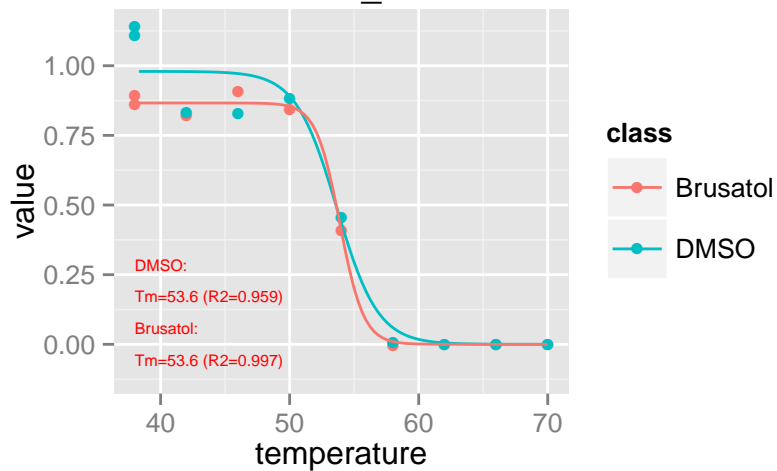

Prot: M21D2\_HUMAN

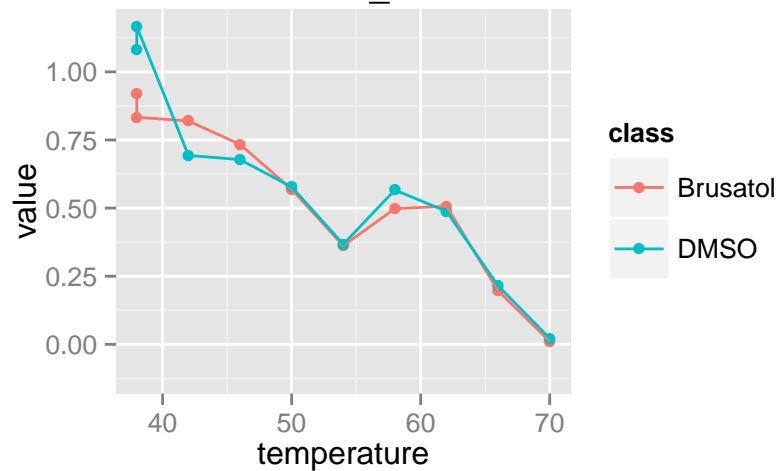

Prot: M3K7\_HUMAN

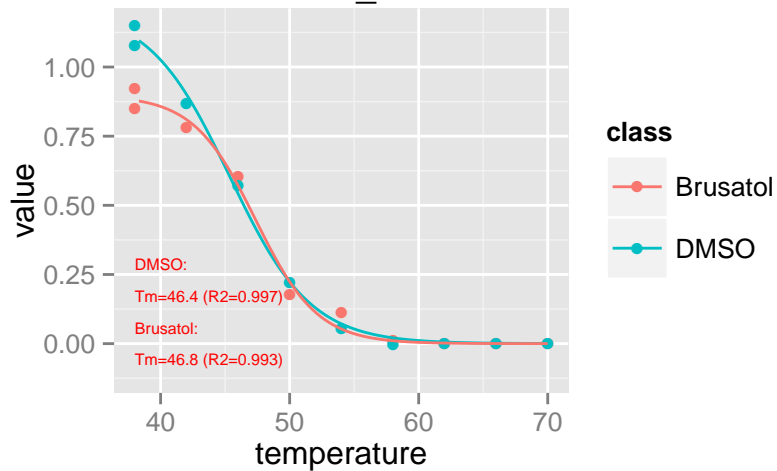

Prot: M4K4\_HUMAN

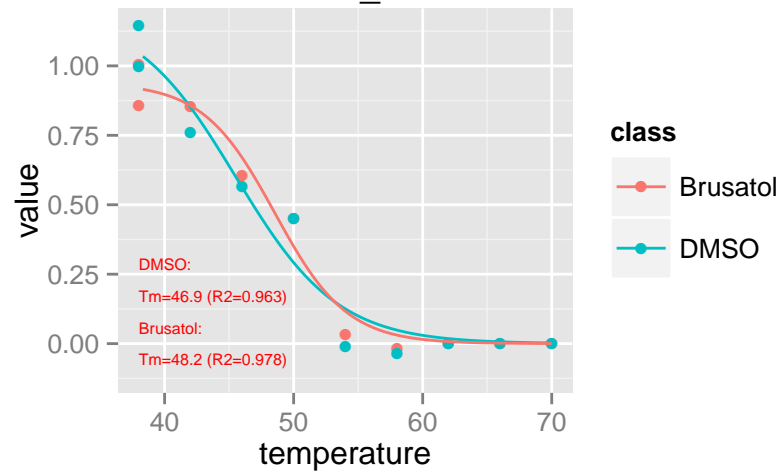

Prot: M89BB\_HUMAN

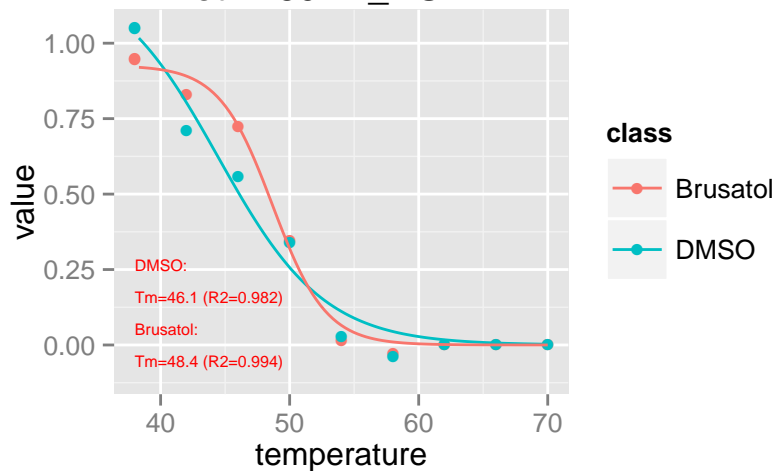

Prot: MA2B1\_HUMAN

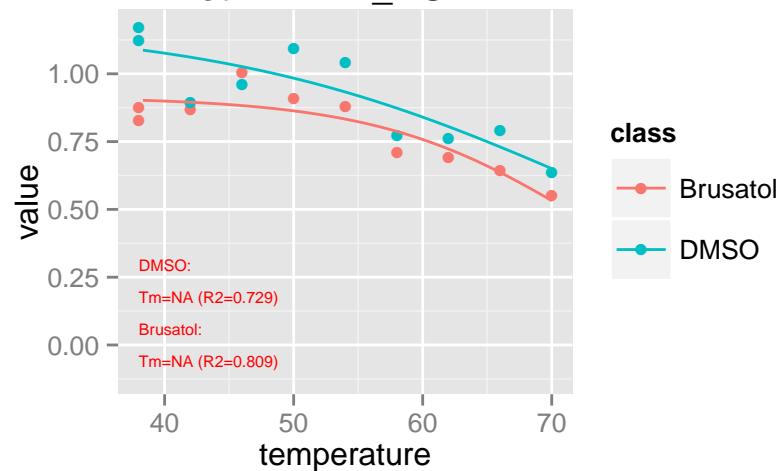

Prot: MA2C1\_HUMAN

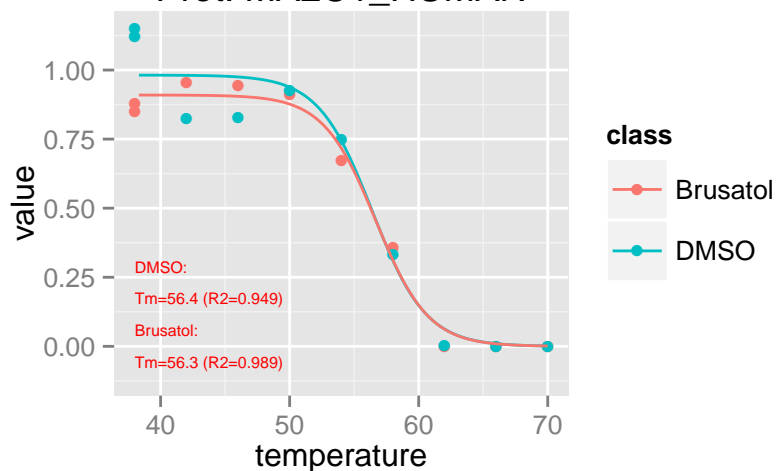

Prot: MA7D1\_HUMAN

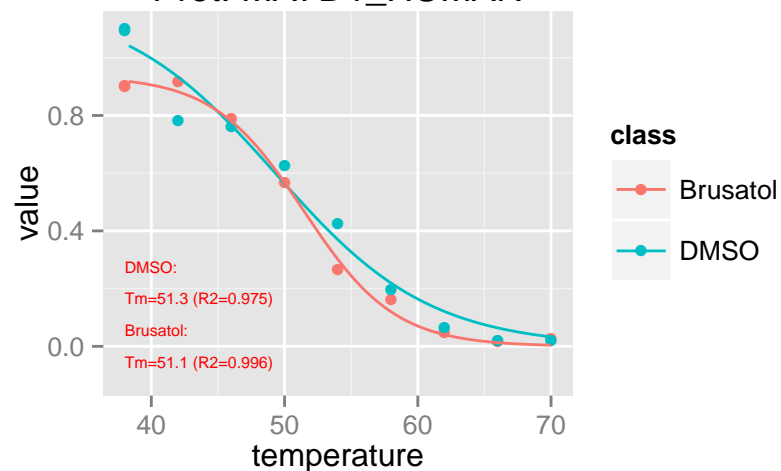

Prot: MA7D2\_HUMAN

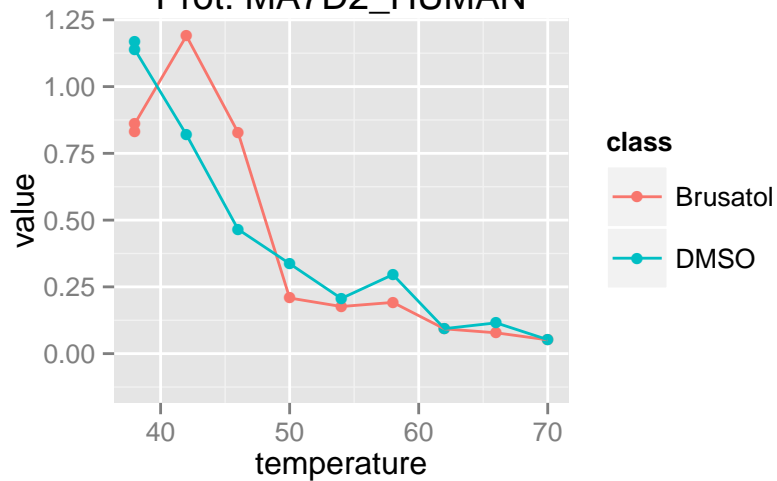

Prot: MAAI\_HUMAN

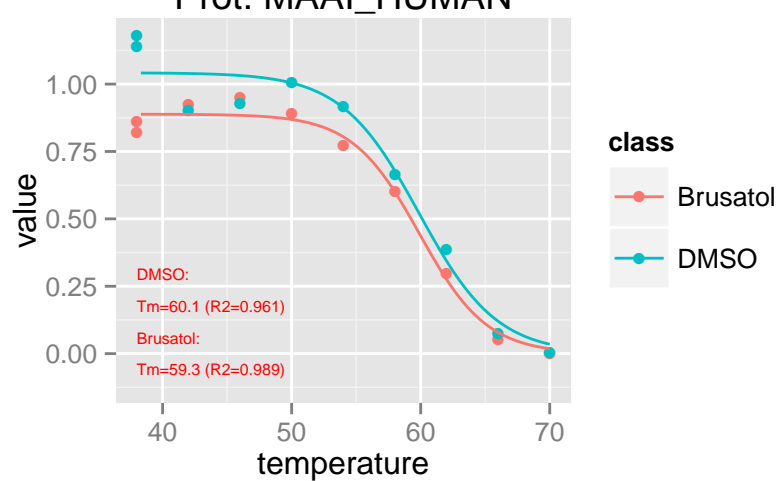

Prot: MACF1\_HUMAN

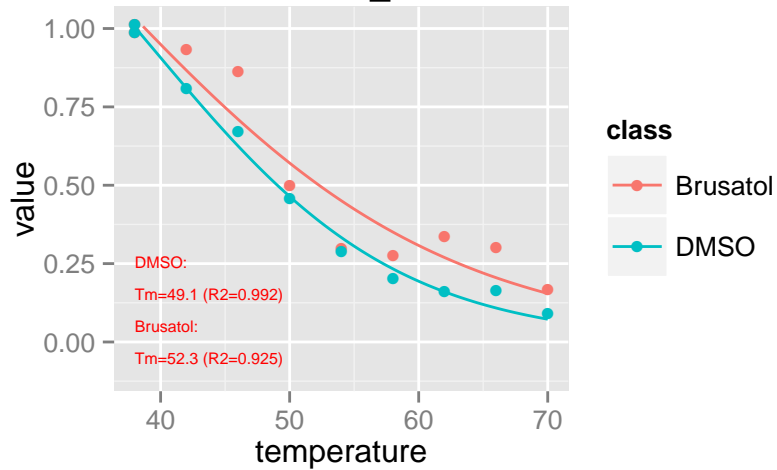

Prot: MACF4\_HUMAN

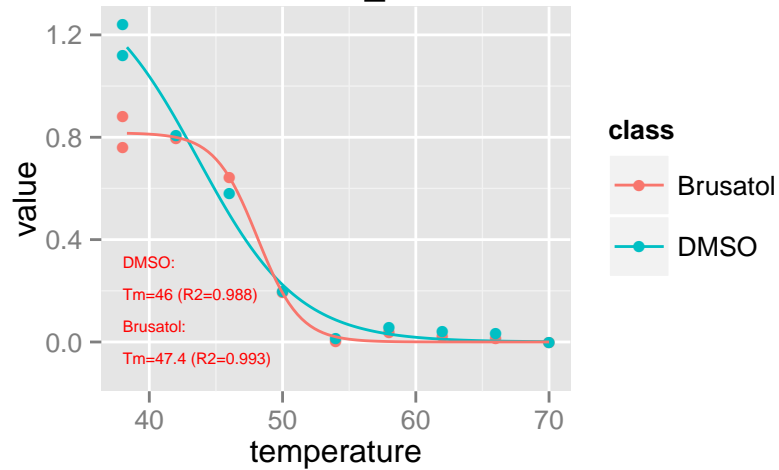

Prot: MAGD2\_HUMAN

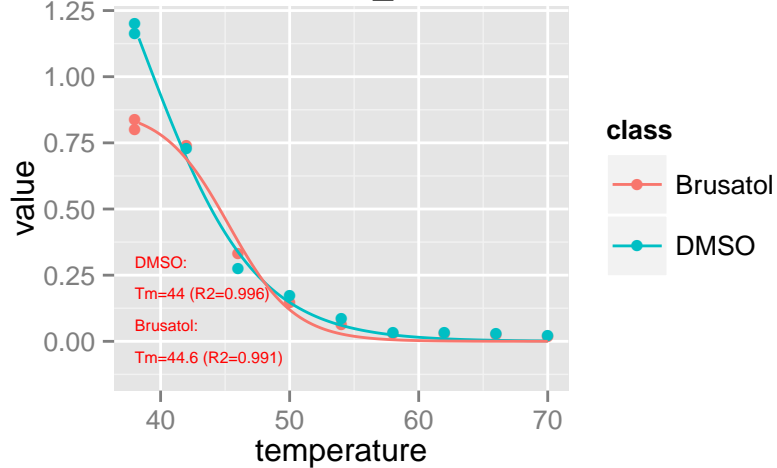

Prot: MALT1\_HUMAN

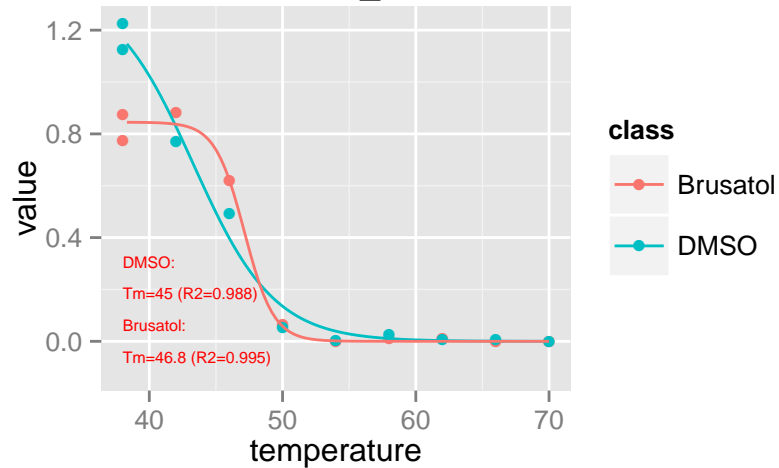



Prot: MANF\_HUMAN

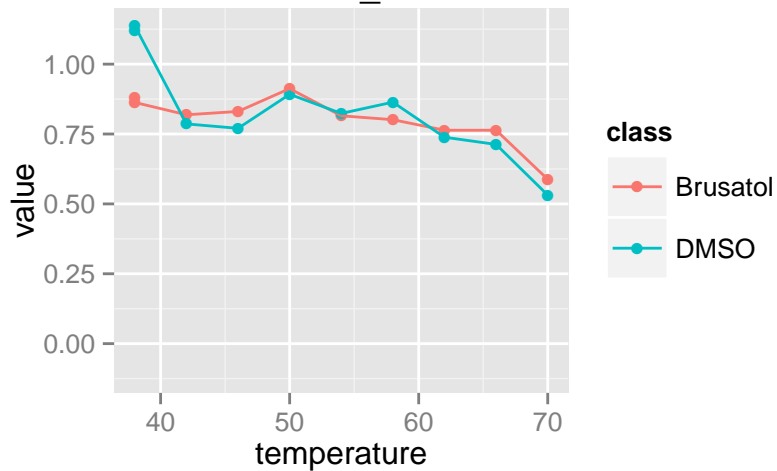

Prot: MAOM\_HUMAN

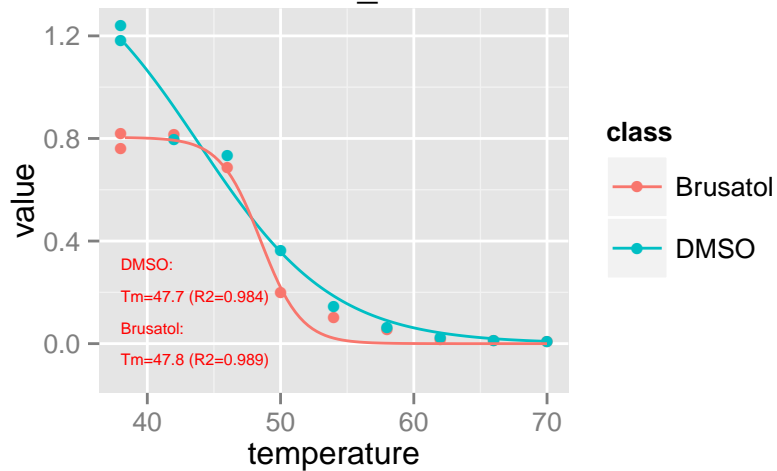

Prot: MAOX\_HUMAN

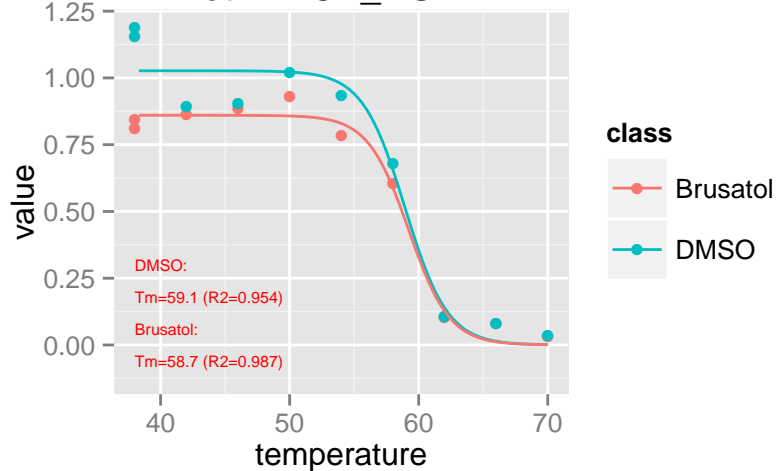

Prot: MAP1A\_HUMAN

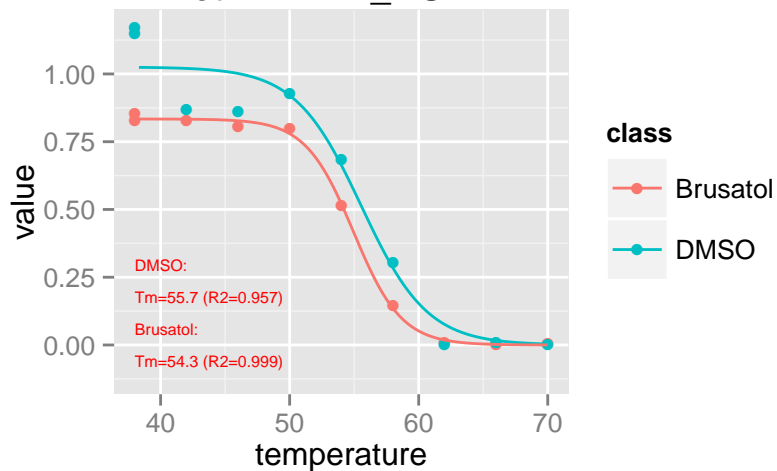

Prot: MAP1B\_HUMAN

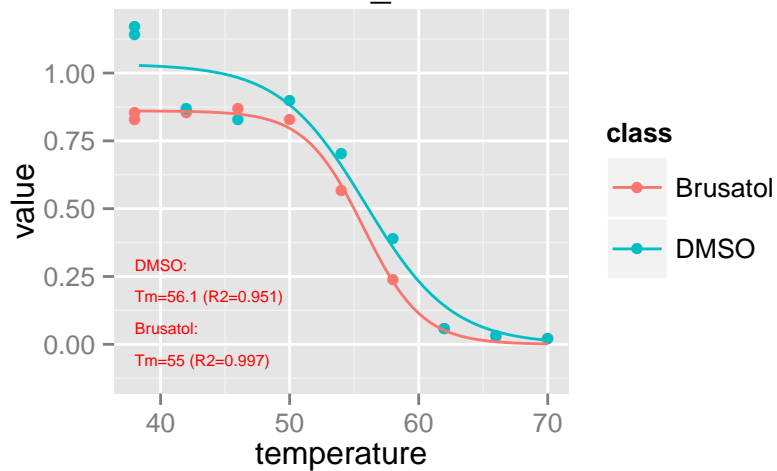

Prot: MAP1S\_HUMAN

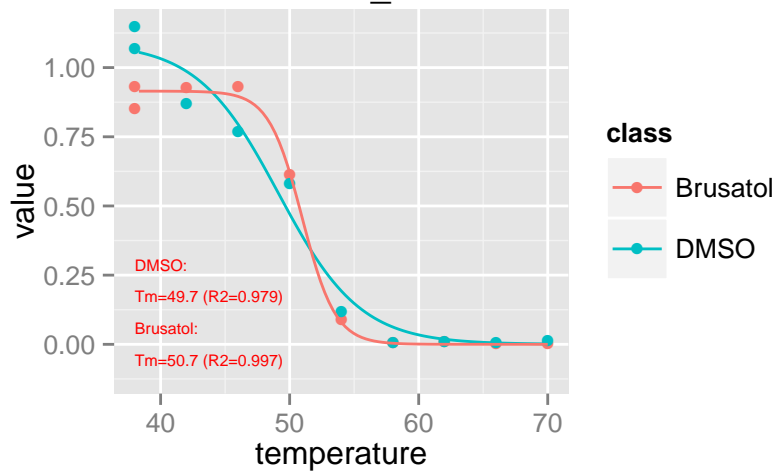

Prot: MAP4\_HUMAN

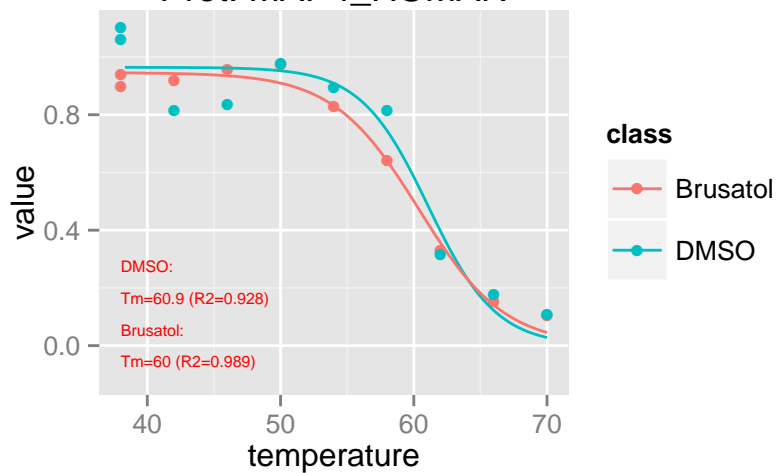

Prot: MAP7\_HUMAN

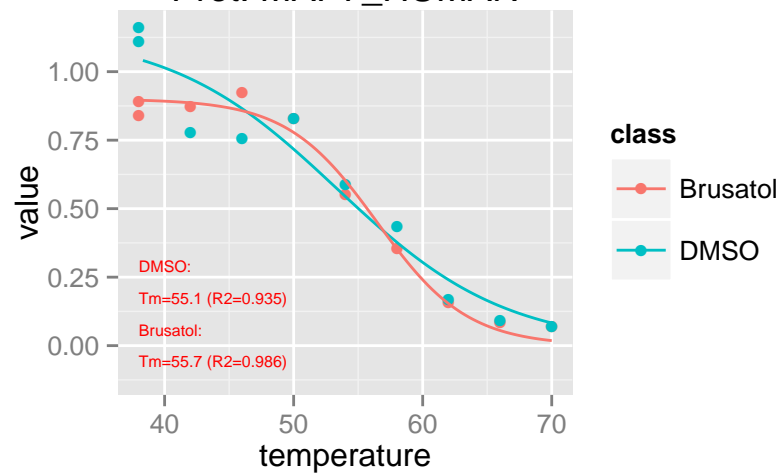

Prot: MAPK2\_HUMAN

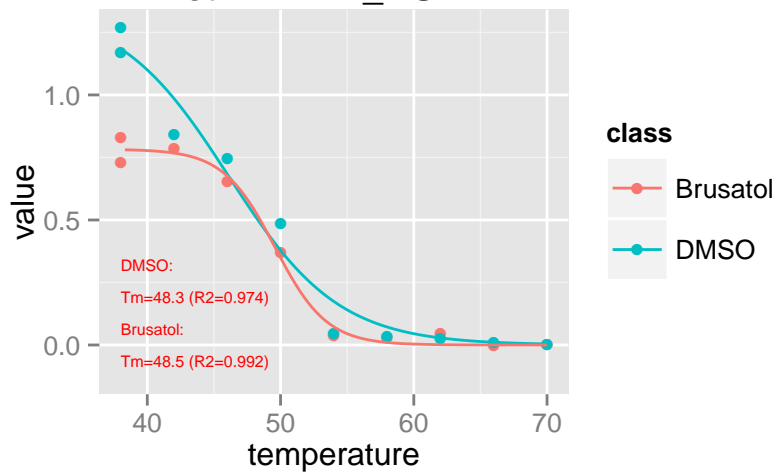

Prot: MARCS\_HUMAN

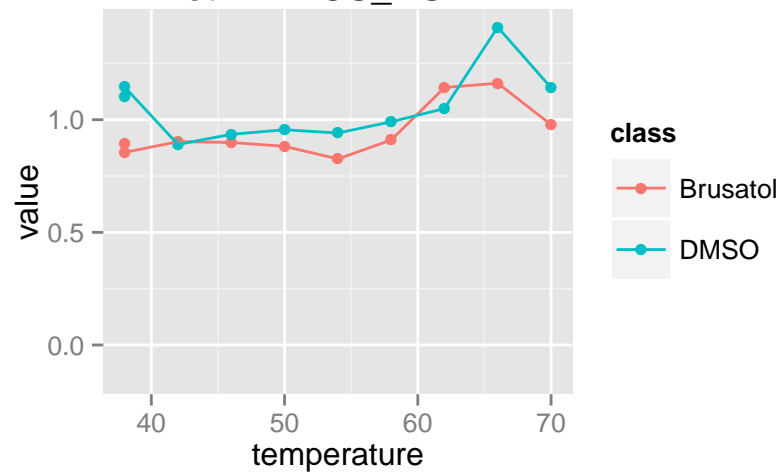

Prot: MARE1\_HUMAN

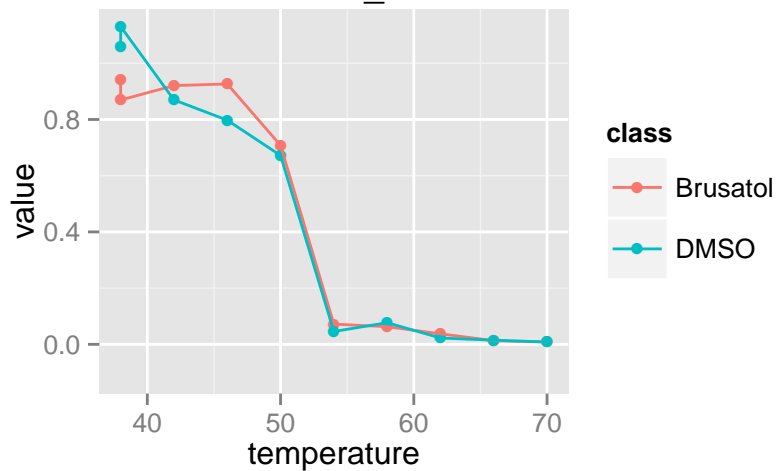

Prot: MARE2\_HUMAN

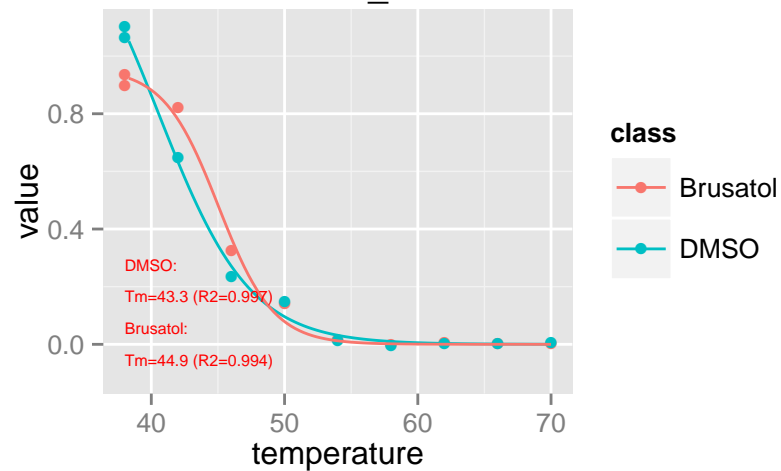

Prot: MAT1\_HUMAN

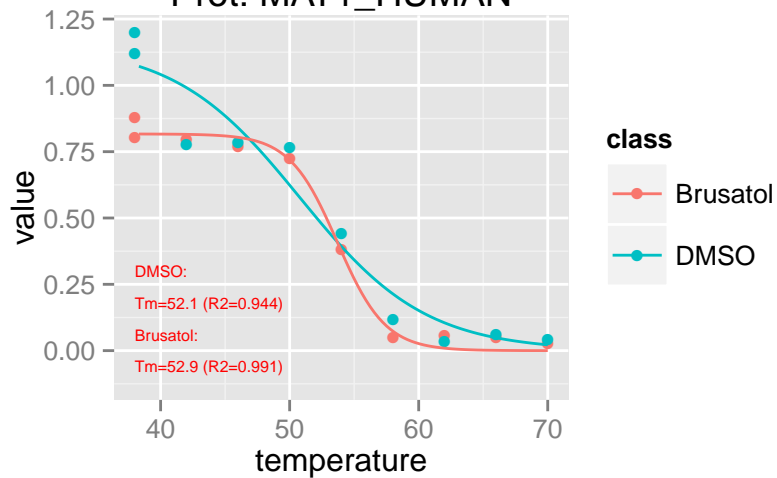

Prot: MAT2B\_HUMAN

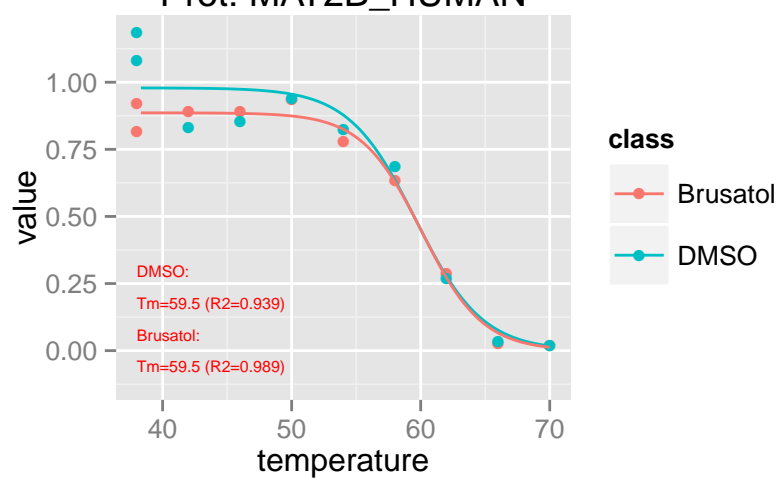

Prot: MATR3\_HUMAN

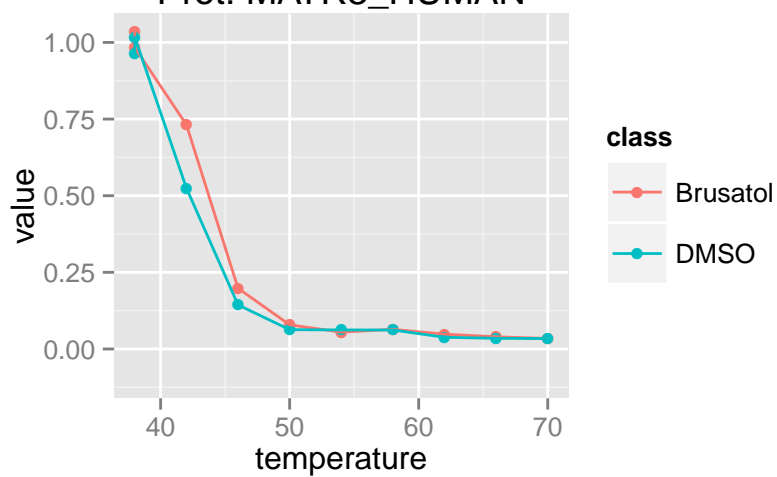

Prot: MAVS\_HUMAN

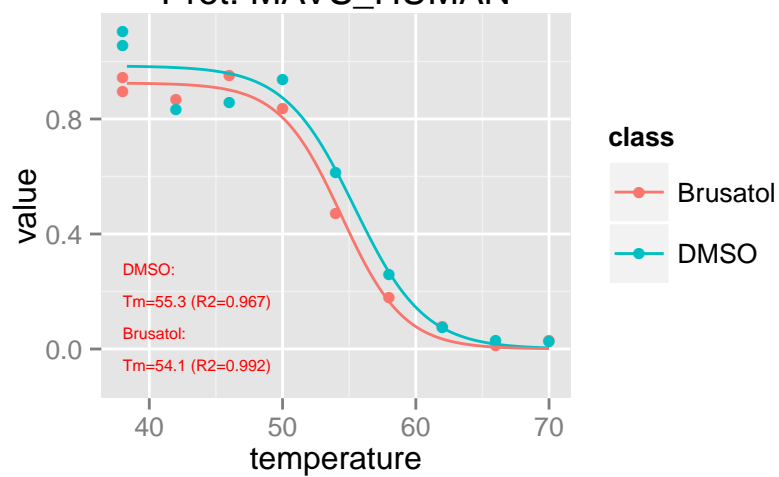

Prot: MAX\_HUMAN

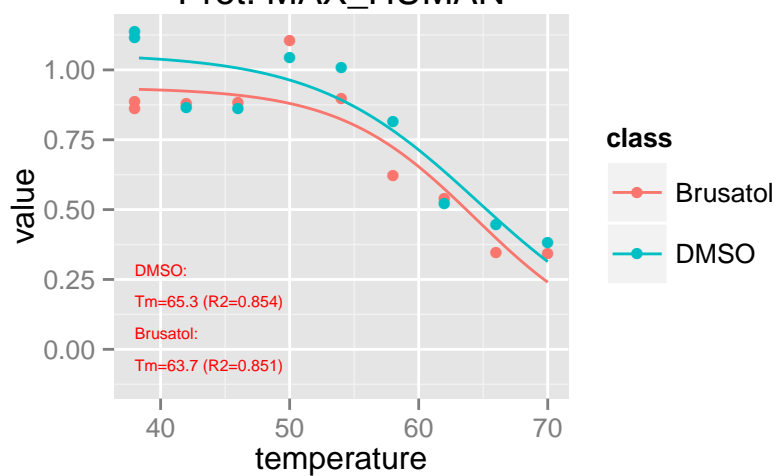

Prot: MBB1A\_HUMAN

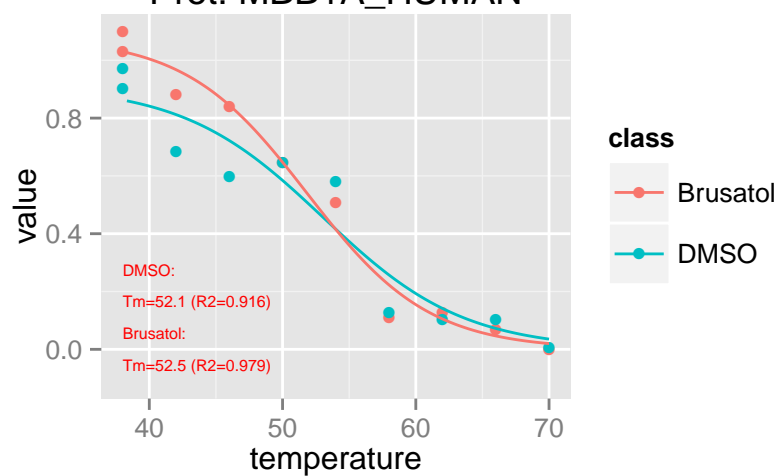

Prot: MBD3\_HUMAN

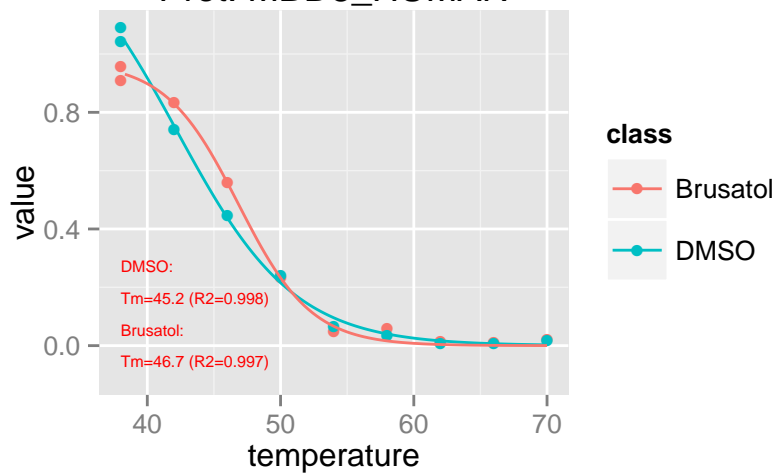

Prot: MBNL1\_HUMAN

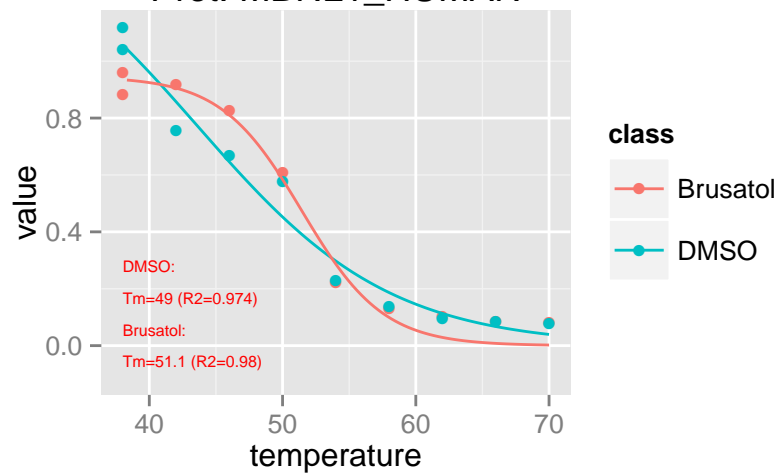

Prot: MCA3\_HUMAN

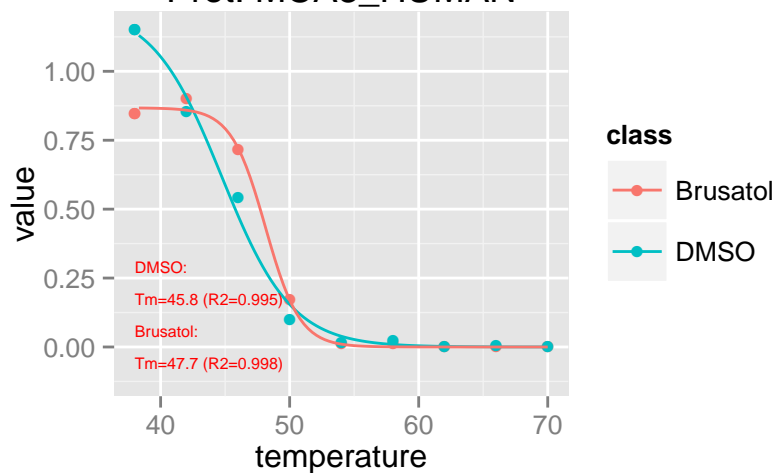

Prot: MCAF1\_HUMAN

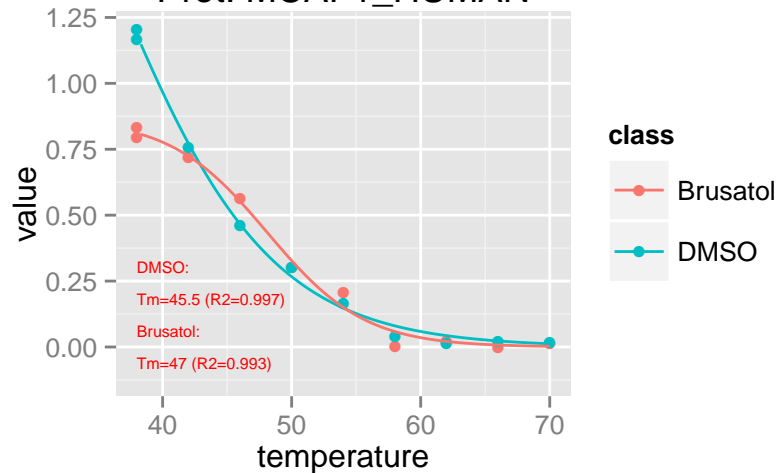

Prot: MCCB\_HUMAN

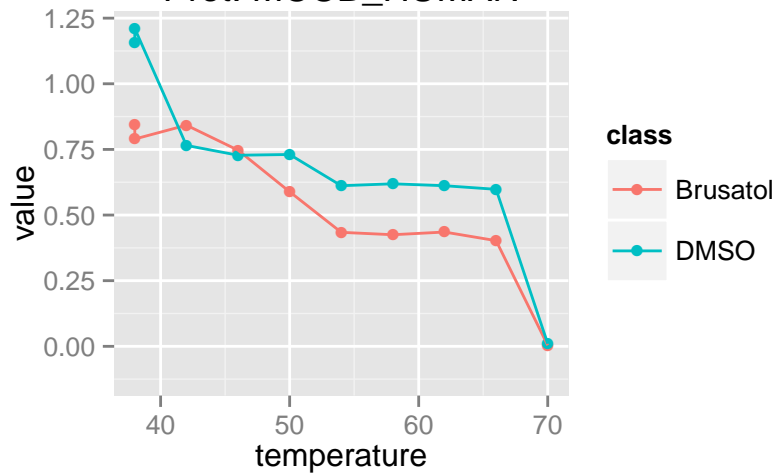

Prot: MCEE\_HUMAN

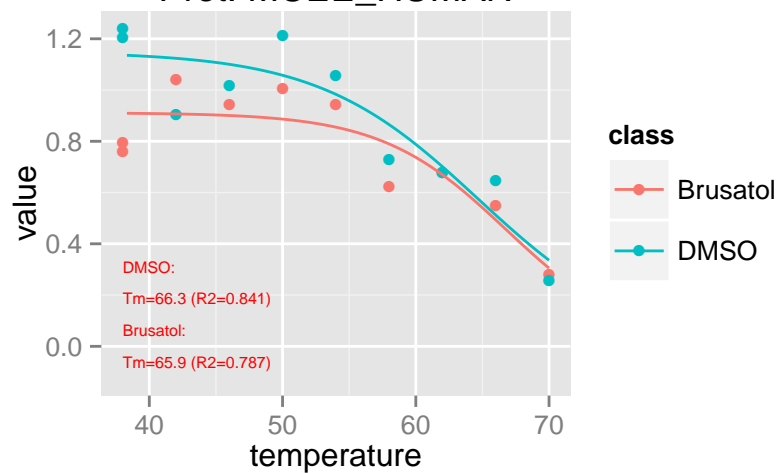

Prot: MCE5\_HUMAN

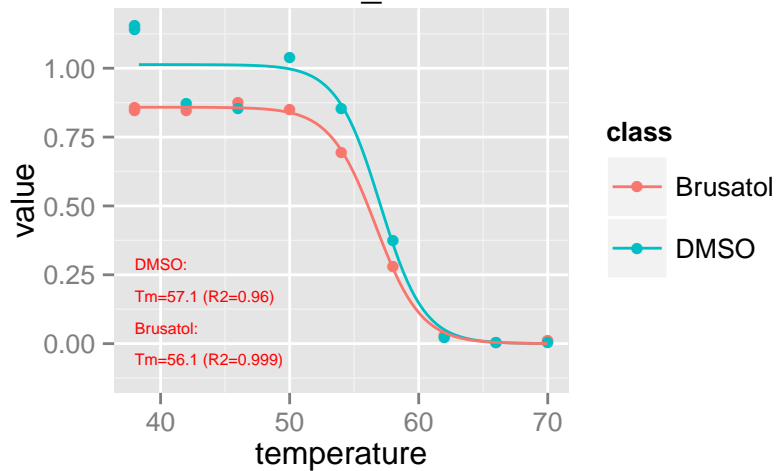

Prot: MCM2\_HUMAN

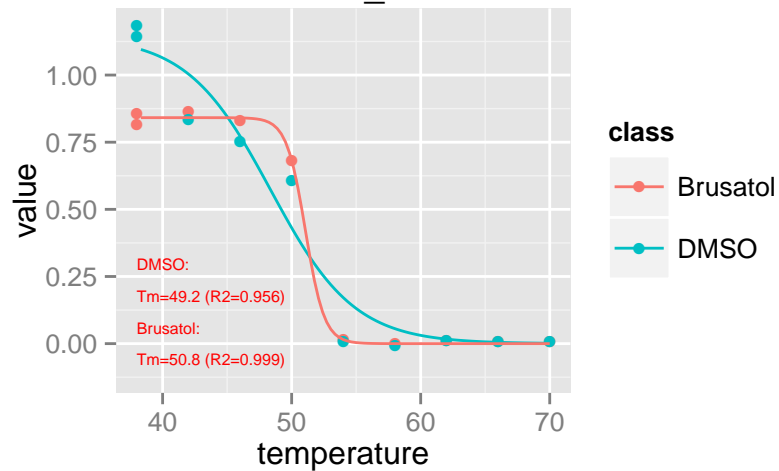

Prot: MCM3\_HUMAN

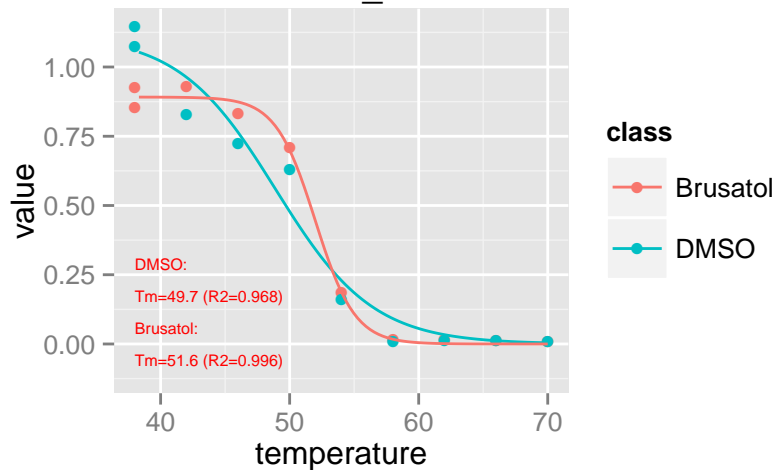

Prot: MCM4\_HUMAN

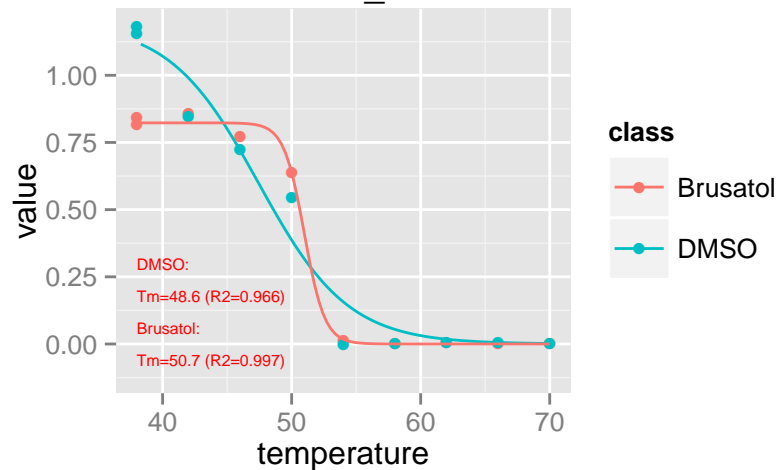

Prot: MCM5\_HUMAN

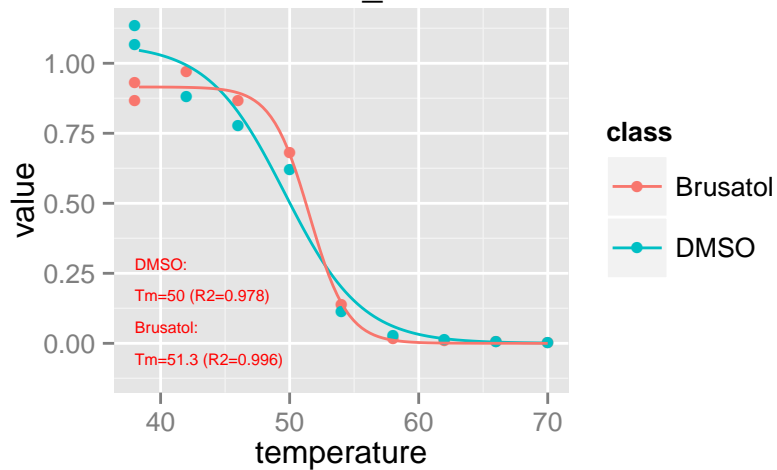

Prot: MCM6\_HUMAN

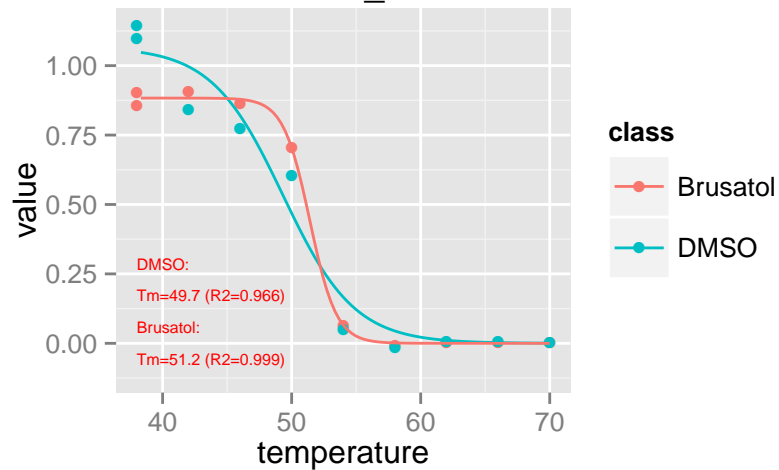

Prot: MCM7\_HUMAN

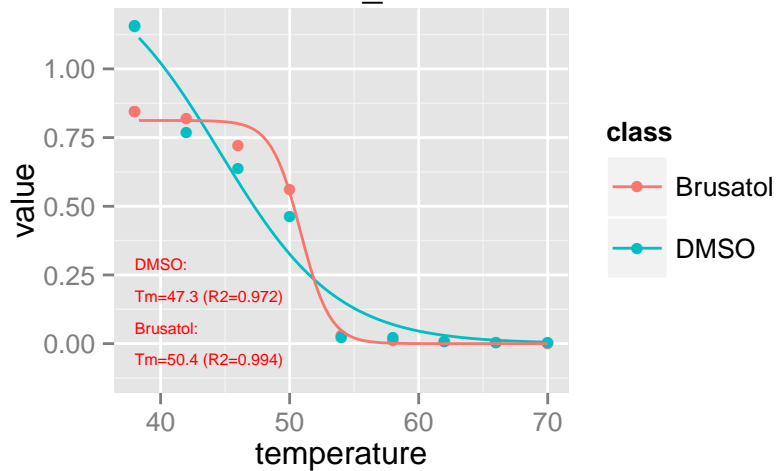

Prot: MCMBP\_HUMAN

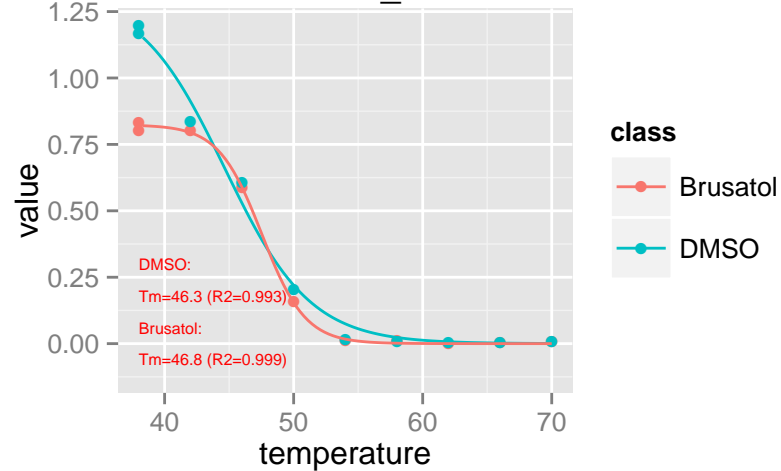

Prot: MCP\_HUMAN

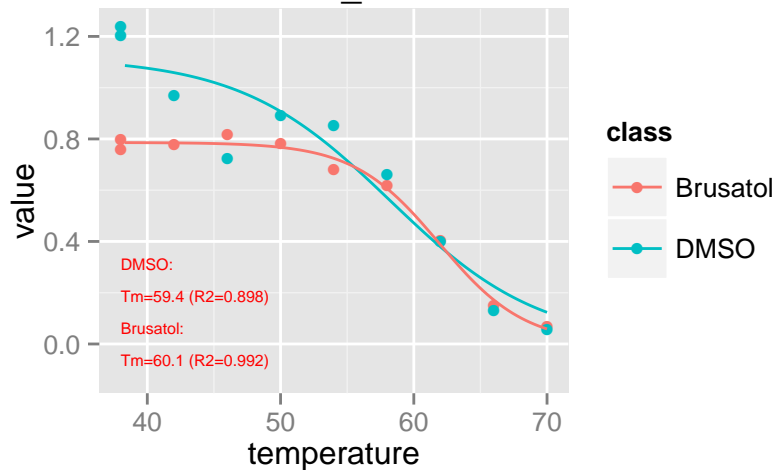

Prot: MCTS1\_HUMAN

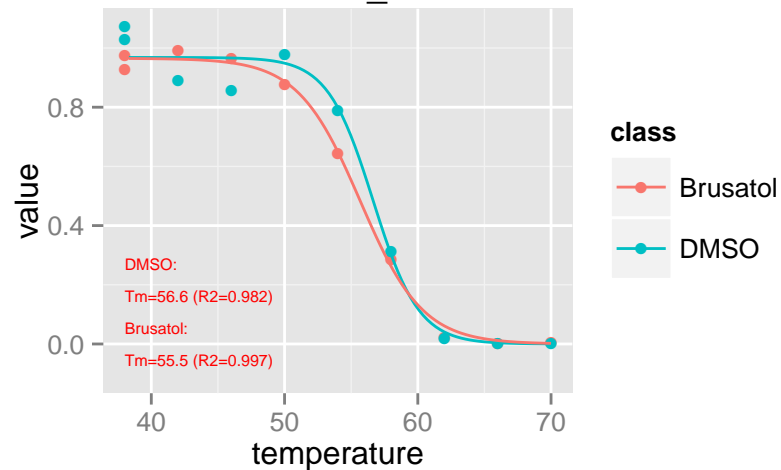

Prot: MD1L1\_HUMAN

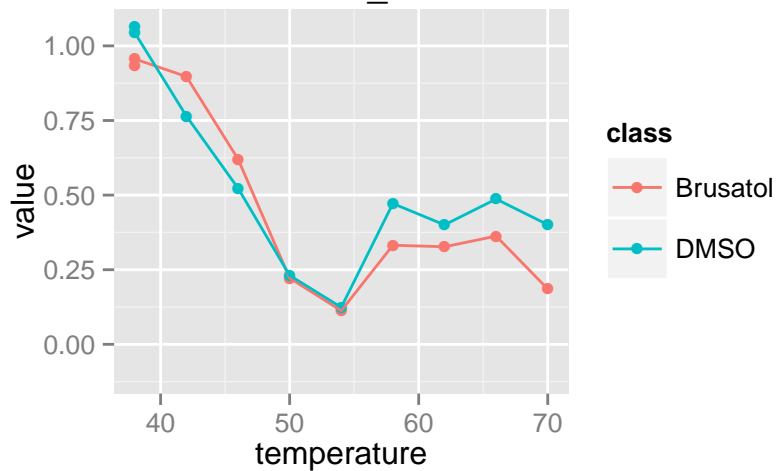

Prot: MD2L1\_HUMAN

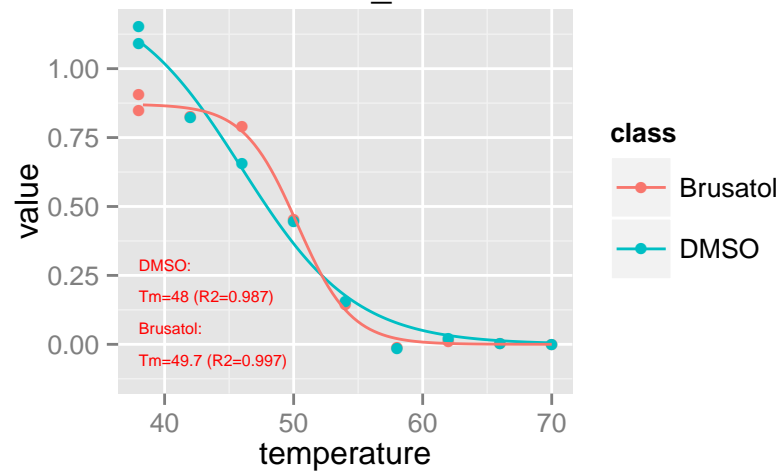

Prot: MDC1\_HUMAN

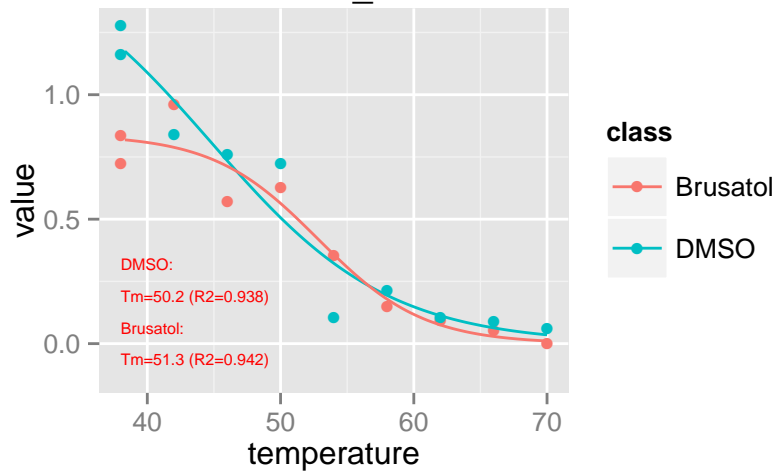

Prot: MDHC\_HUMAN

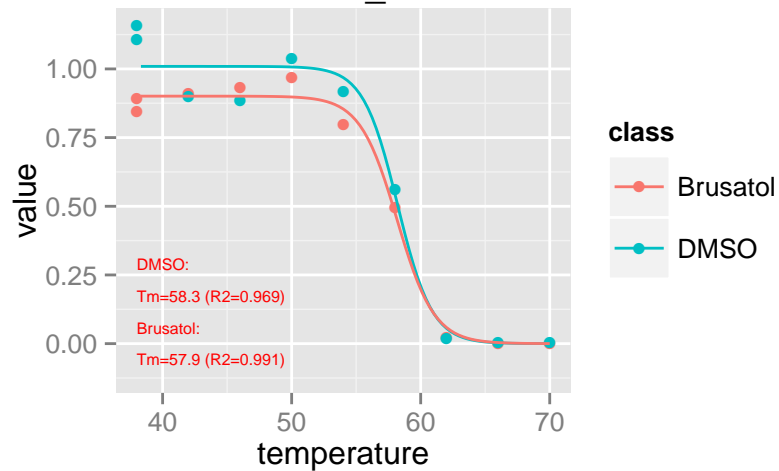

Prot: MDHM\_HUMAN

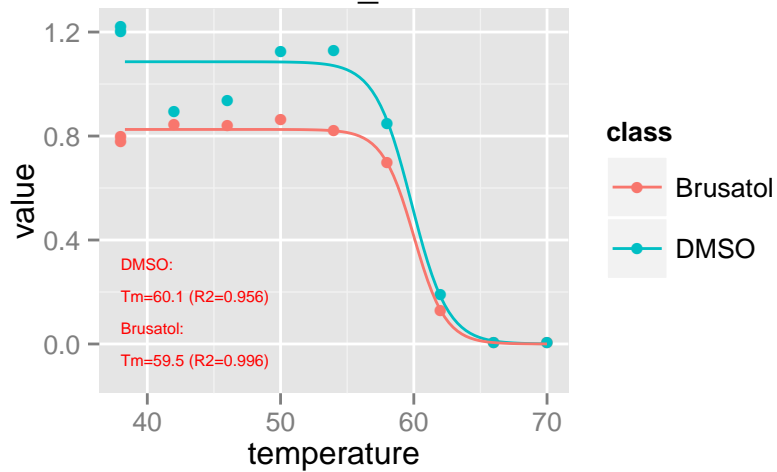

Prot: MDN1\_HUMAN

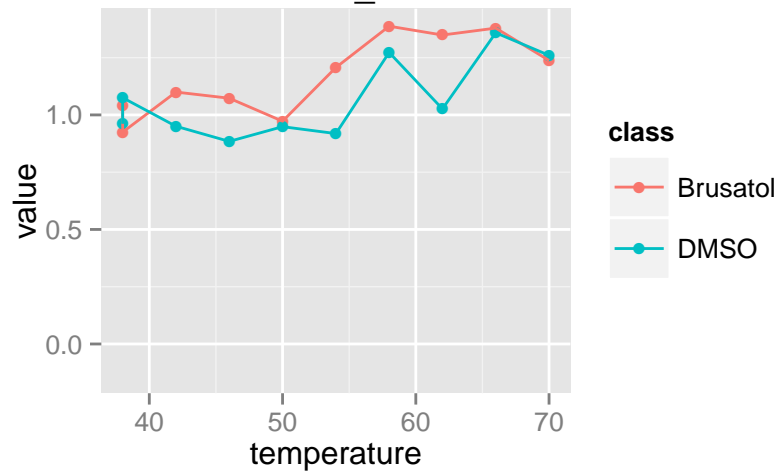

Prot: MEA1\_HUMAN

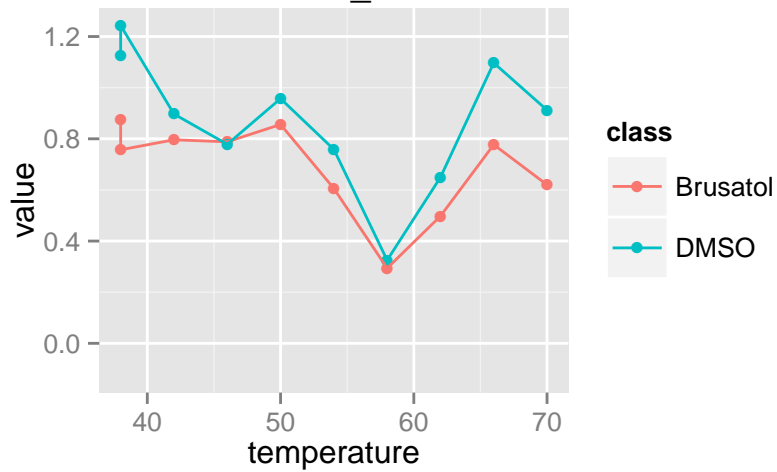

Prot: MED1\_HUMAN

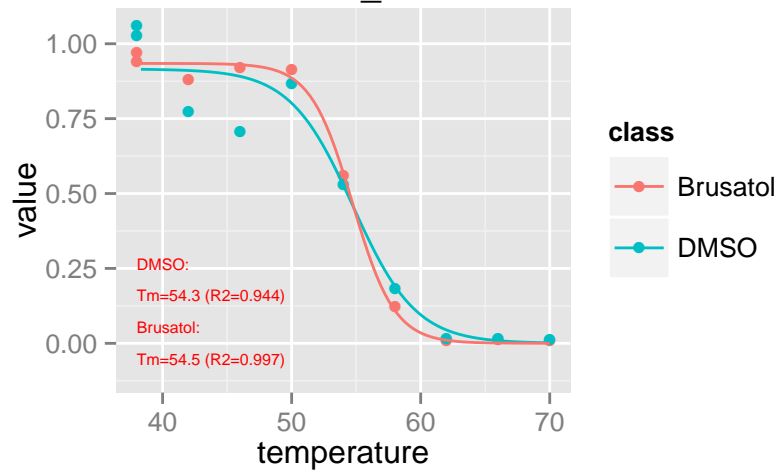

Prot: MED15\_HUMAN

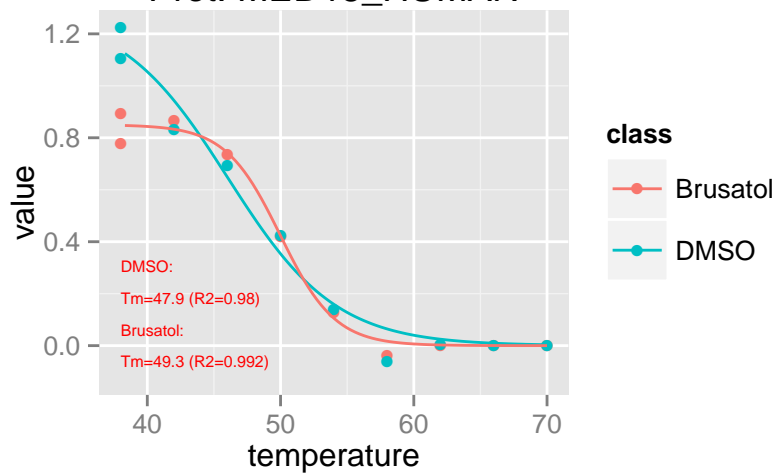

Prot: MED23\_HUMAN

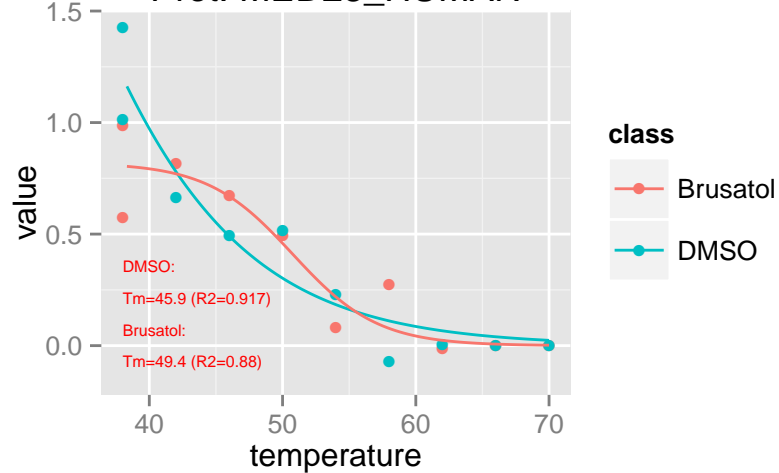

Prot: MED29\_HUMAN

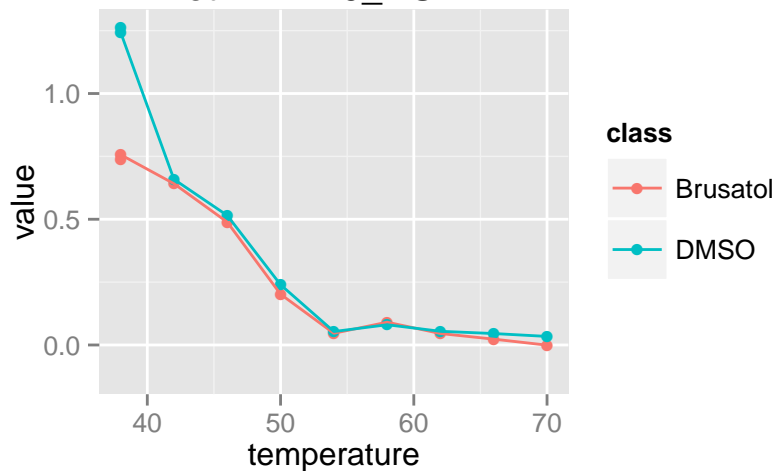

Prot: MEMO1\_HUMAN

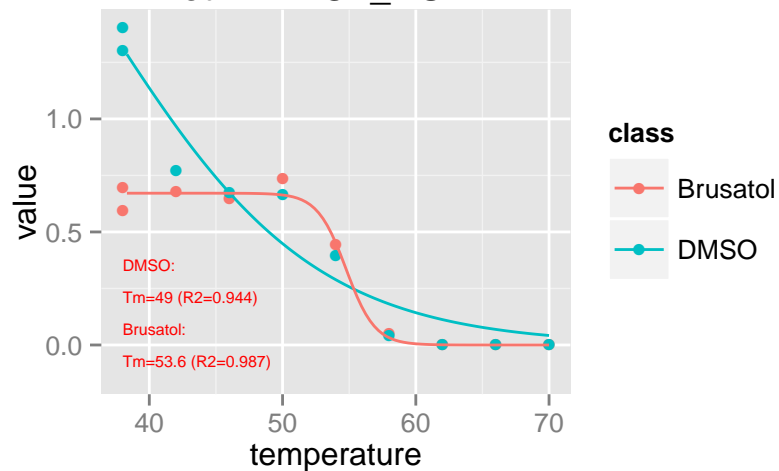

Prot: MEP50\_HUMAN

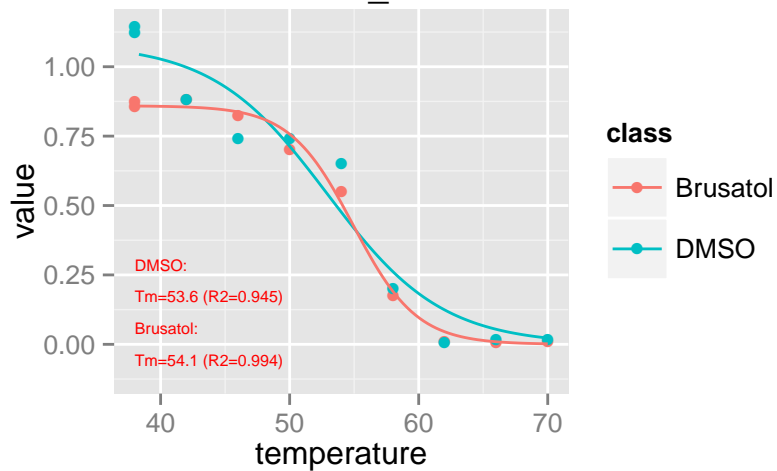

Prot: MEPCE\_HUMAN

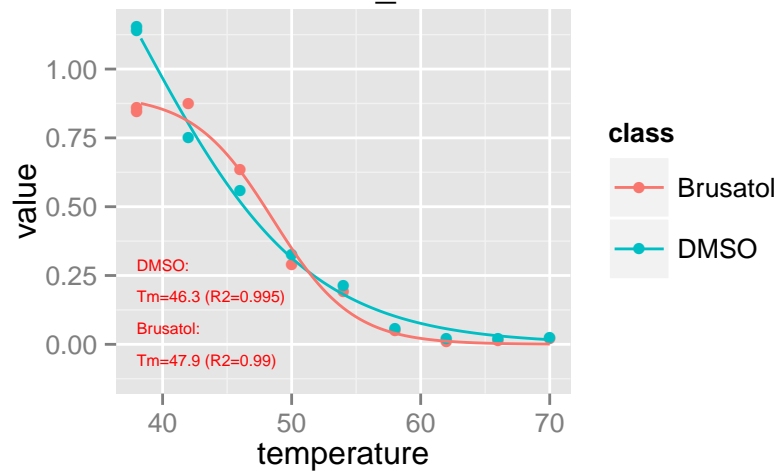



Prot: MERL\_HUMAN

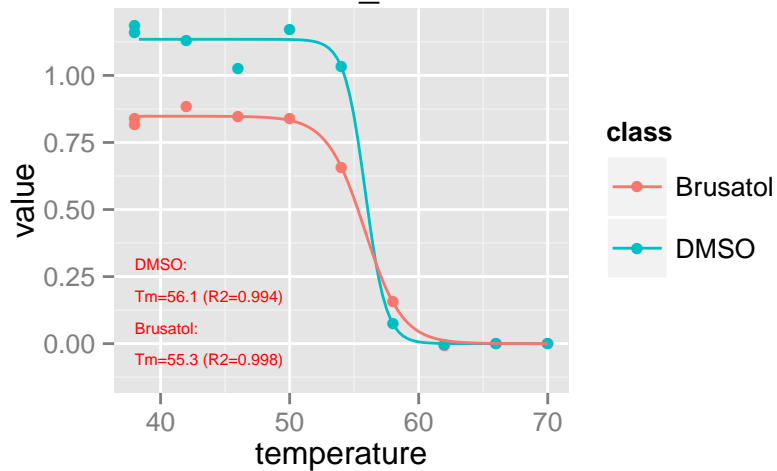

Prot: MESD\_HUMAN

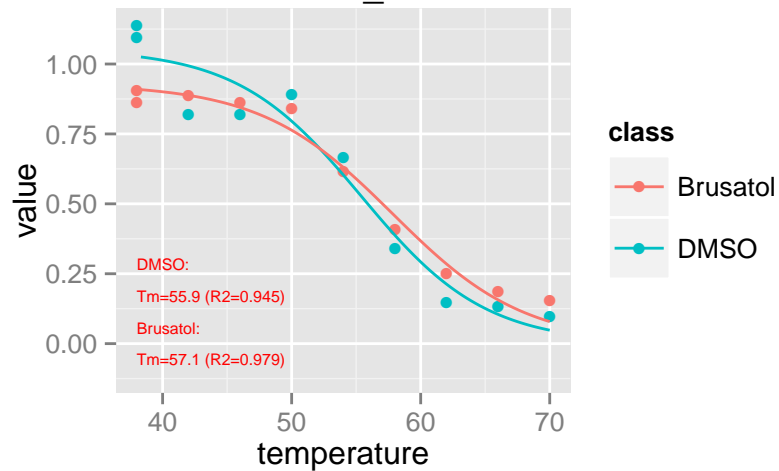

Prot: MET\_HUMAN

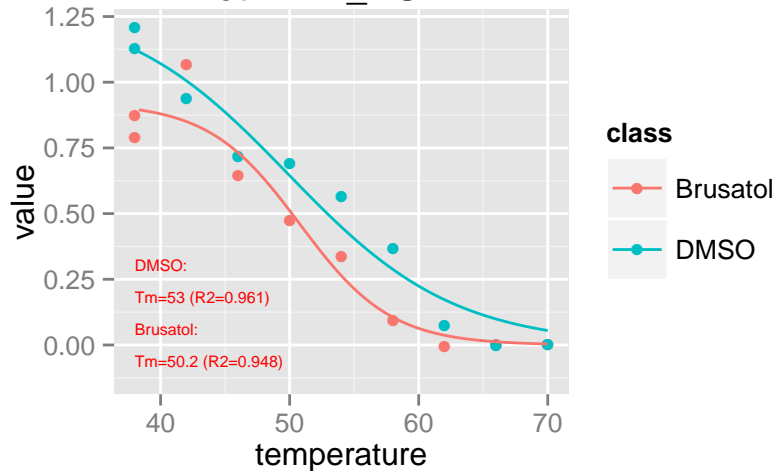

Prot: MET16\_HUMAN

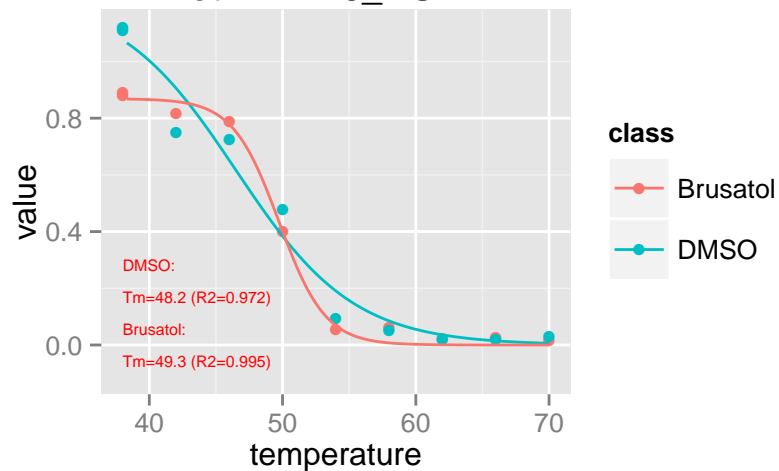

Prot: METK1\_HUMAN

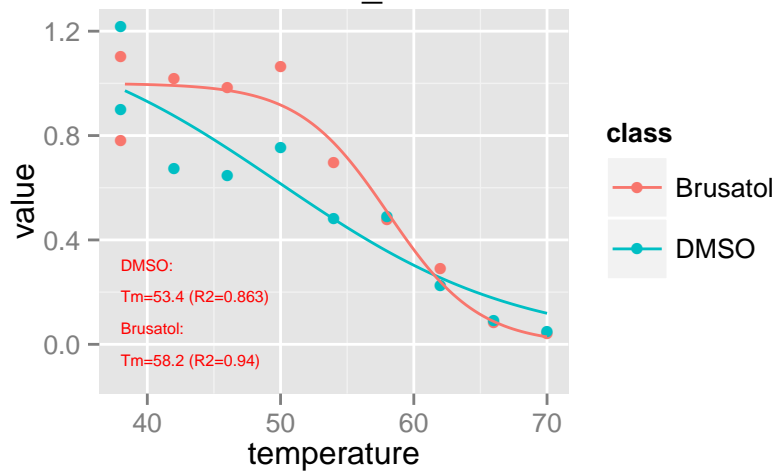

Prot: METK2\_HUMAN

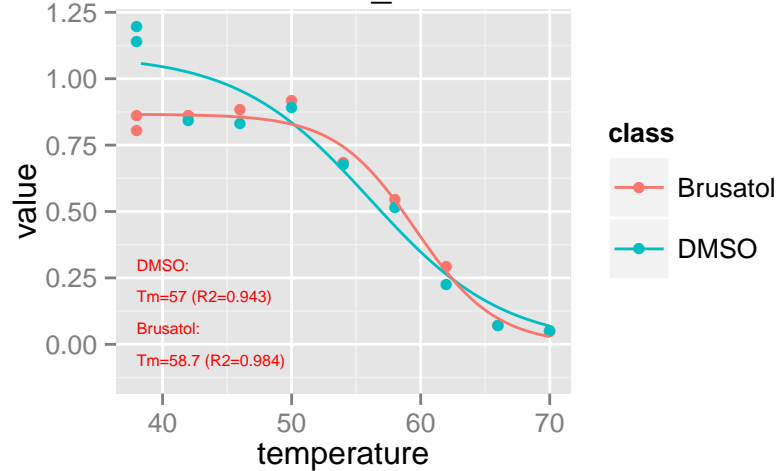

Prot: MFAP1\_HUMAN

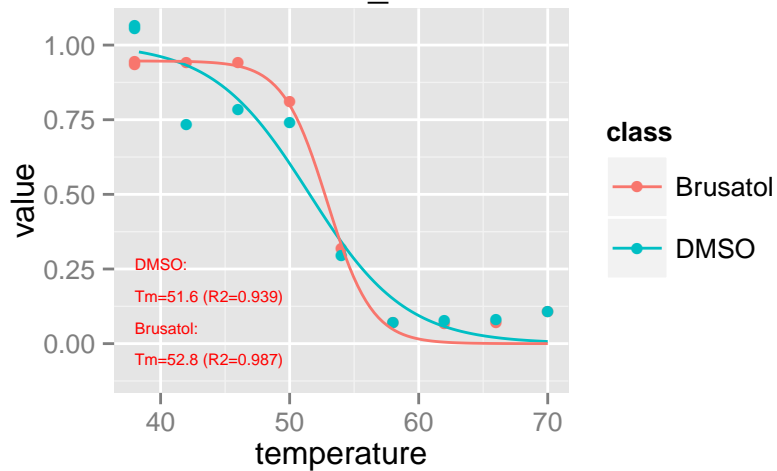

Prot: MGDP1\_HUMAN

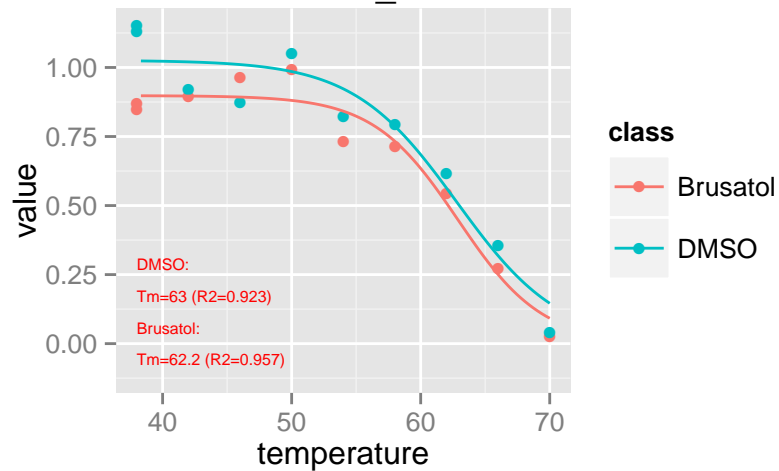

Prot: MGLL\_HUMAN

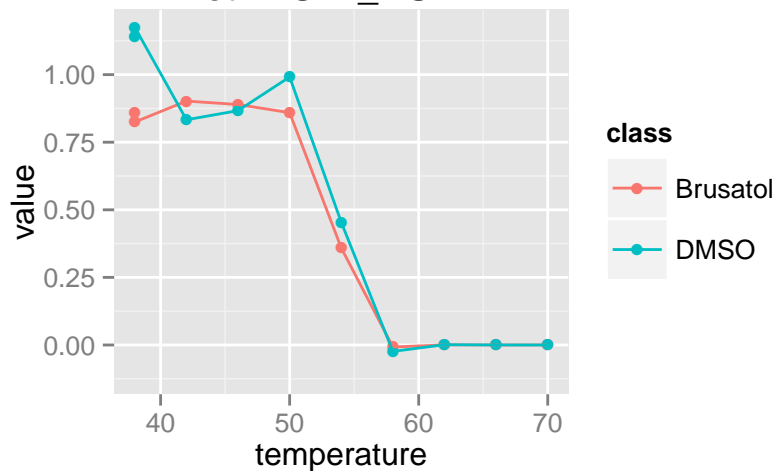

Prot: MGMT\_HUMAN

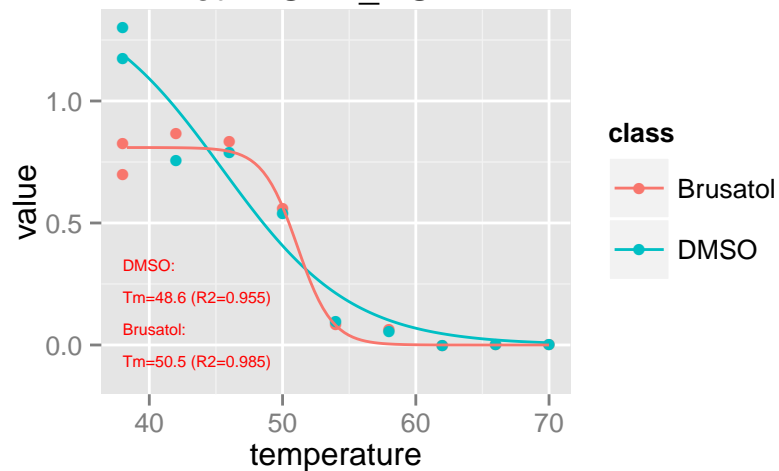

Prot: MGN2\_HUMAN

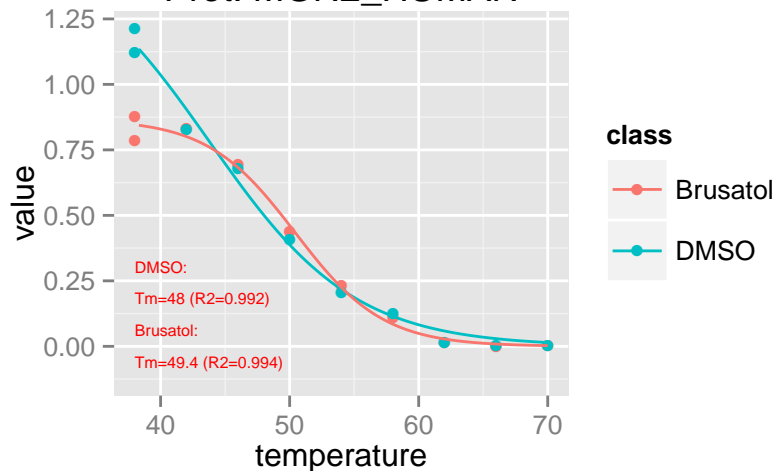

Prot: MIDA\_HUMAN

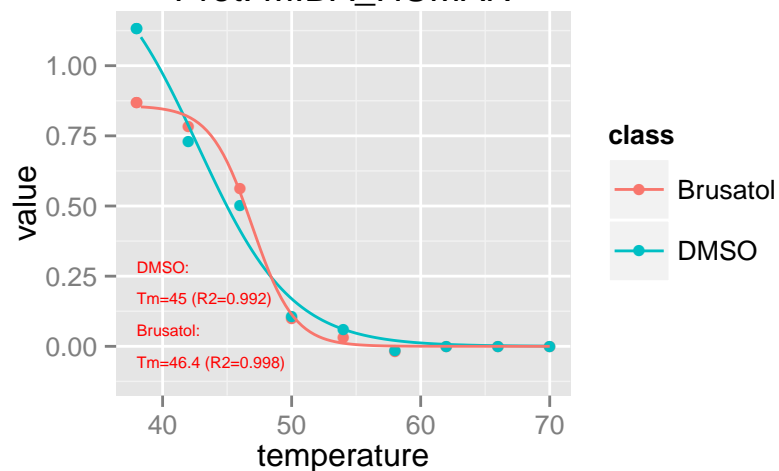

Prot: MIEN1\_HUMAN

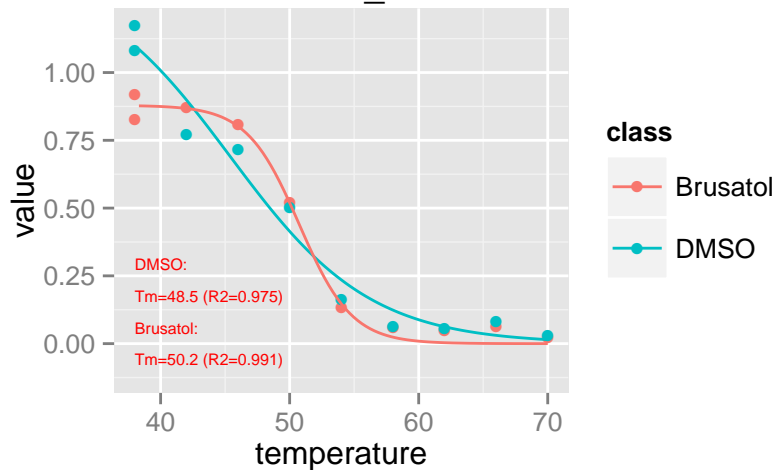

Prot: MIER1\_HUMAN

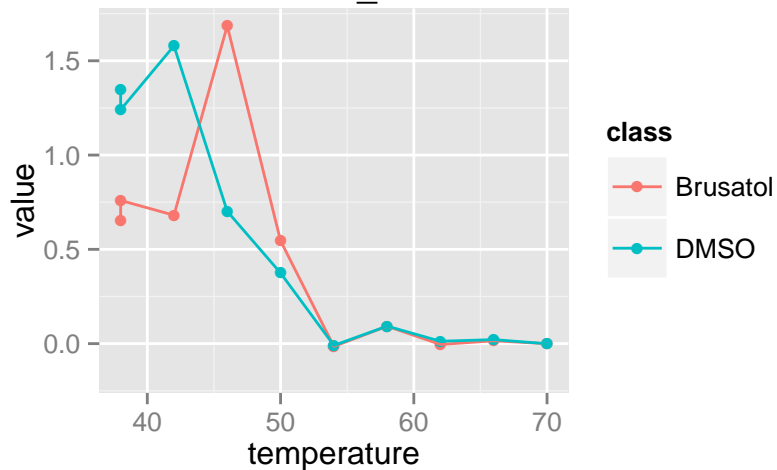

Prot: MIF\_HUMAN

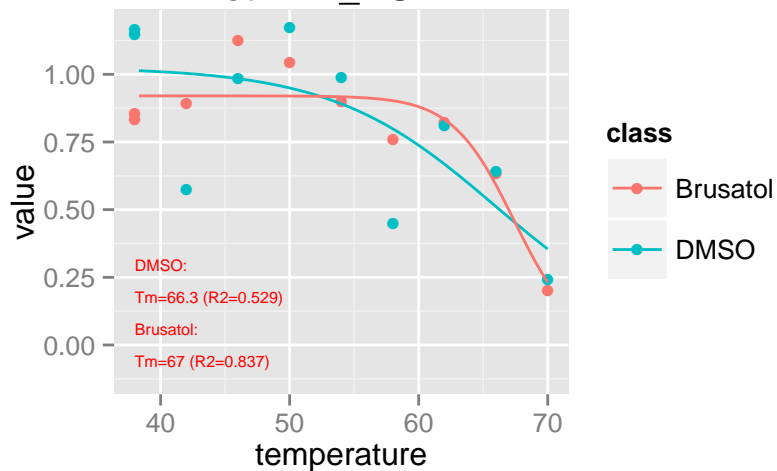

Prot: MINP1\_HUMAN

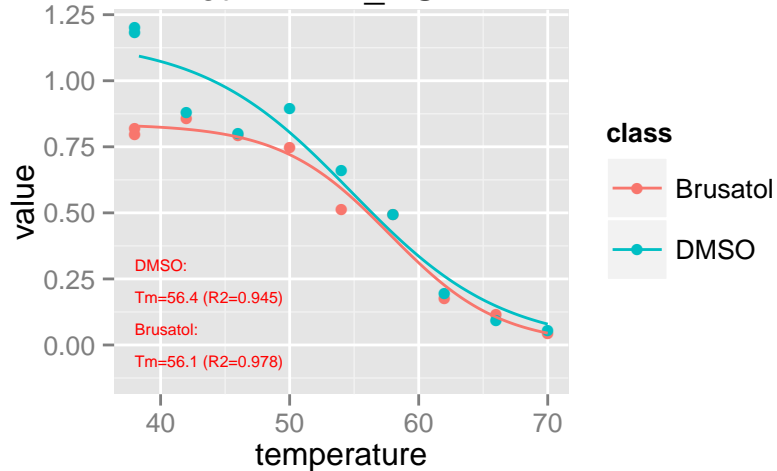

Prot: MIP18\_HUMAN

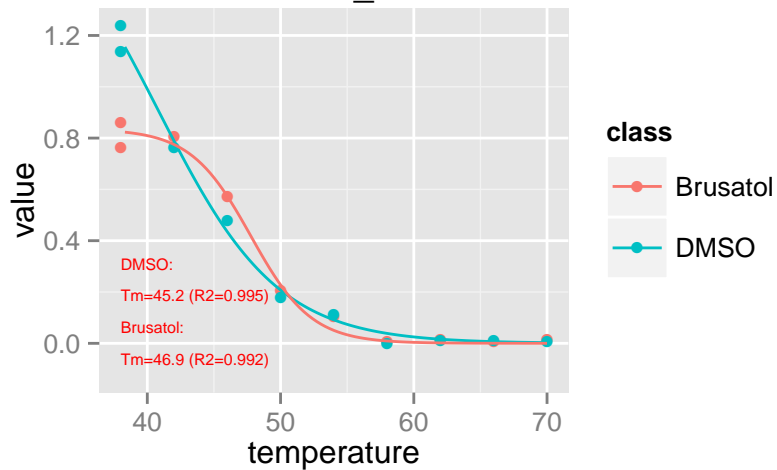

Prot: MIPEP\_HUMAN

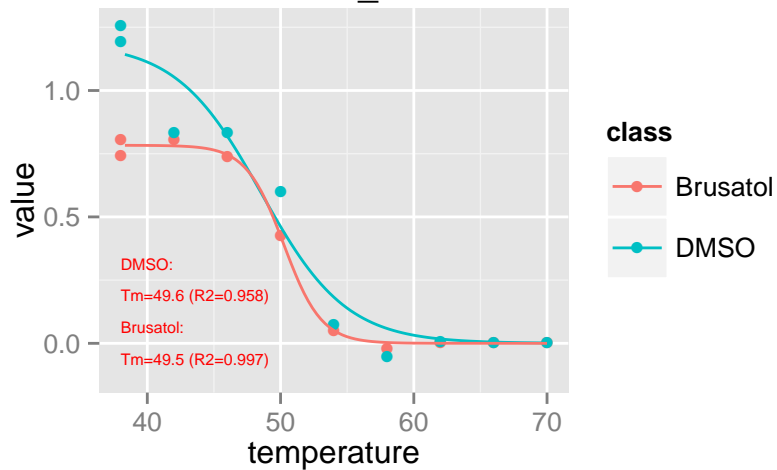

Prot: MK01\_HUMAN

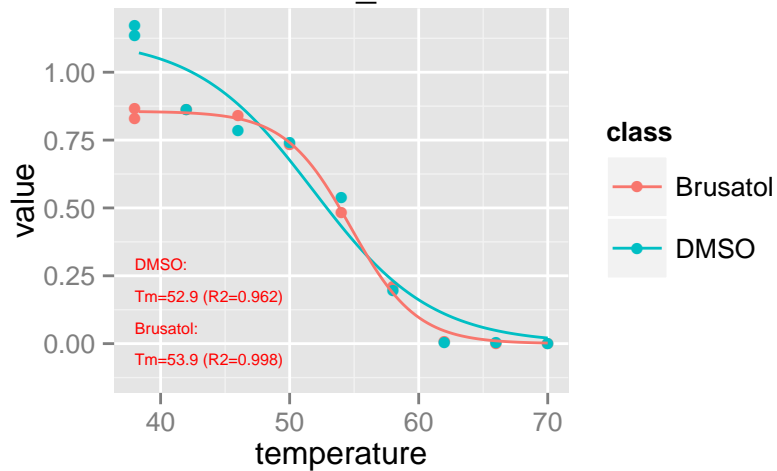

Prot: MK03\_HUMAN

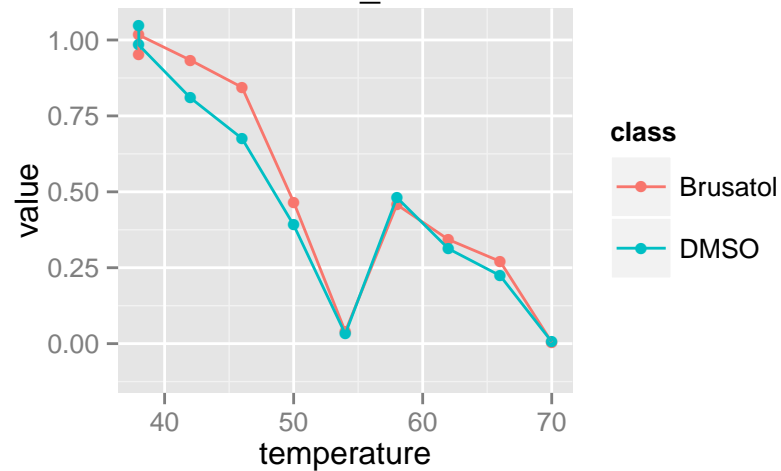

Prot: MK08\_HUMAN

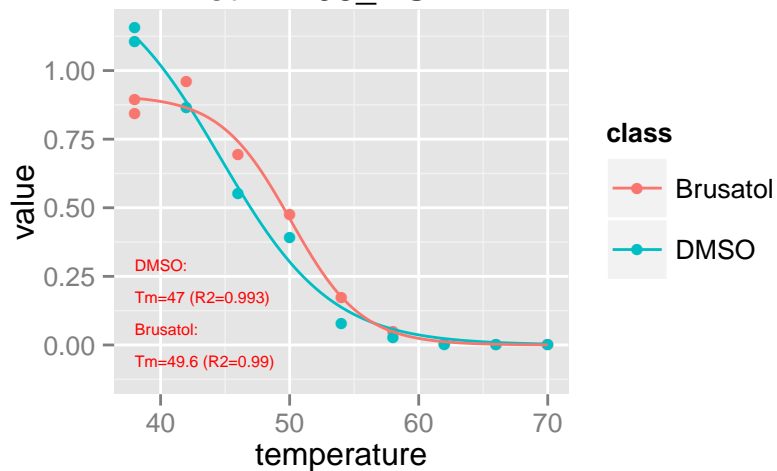

Prot: MK14\_HUMAN

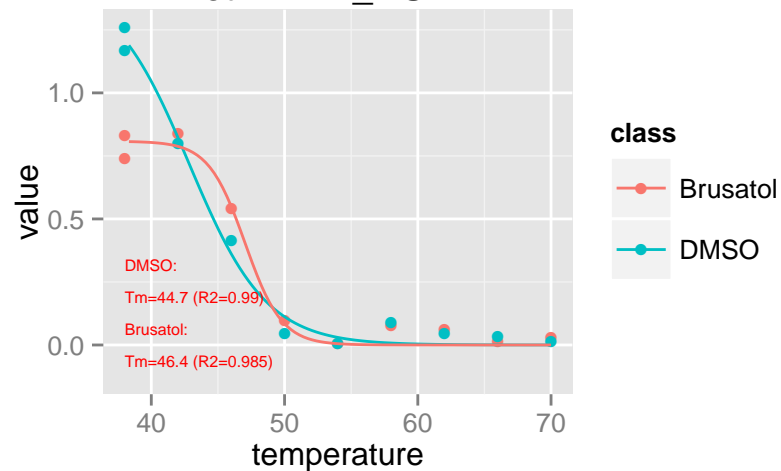

Prot: MKL2\_HUMAN

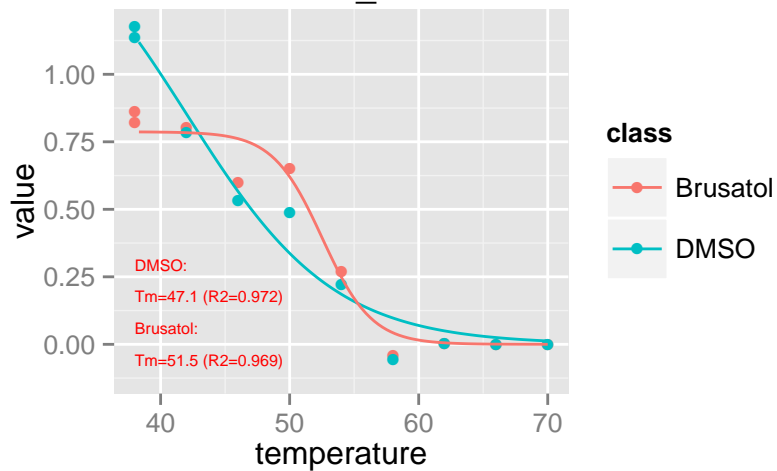

Prot: MKLN1\_HUMAN

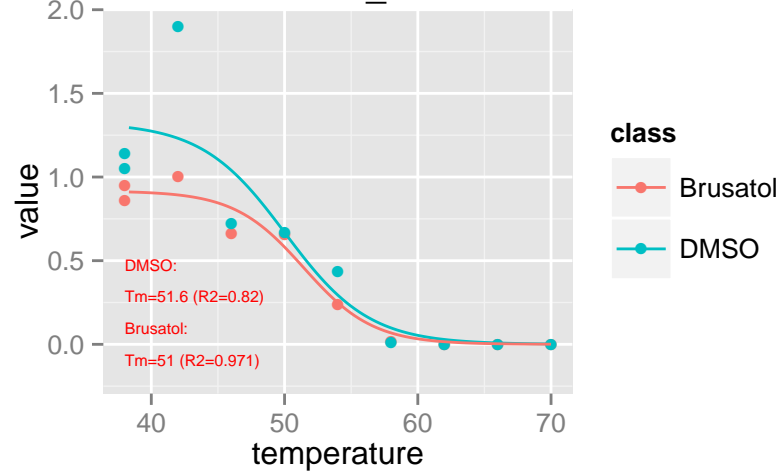

Prot: ML12A\_HUMAN

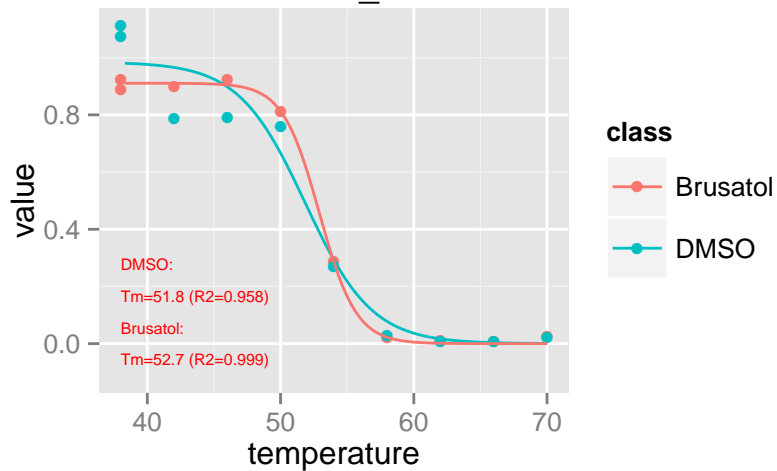

Prot: MLF2\_HUMAN

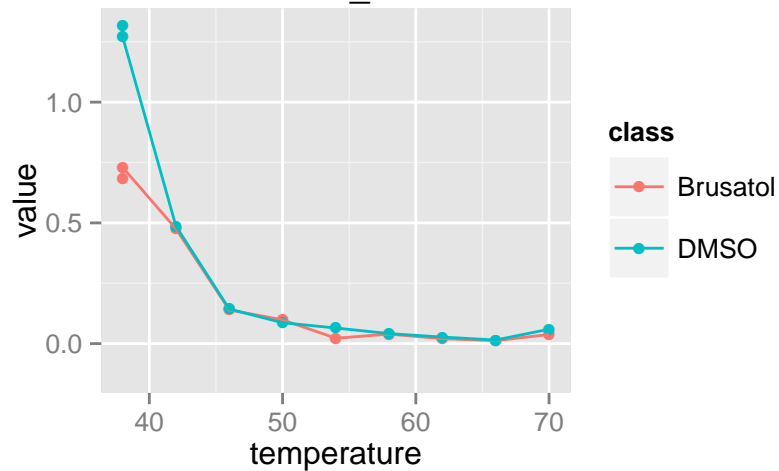

Prot: MLH1\_HUMAN

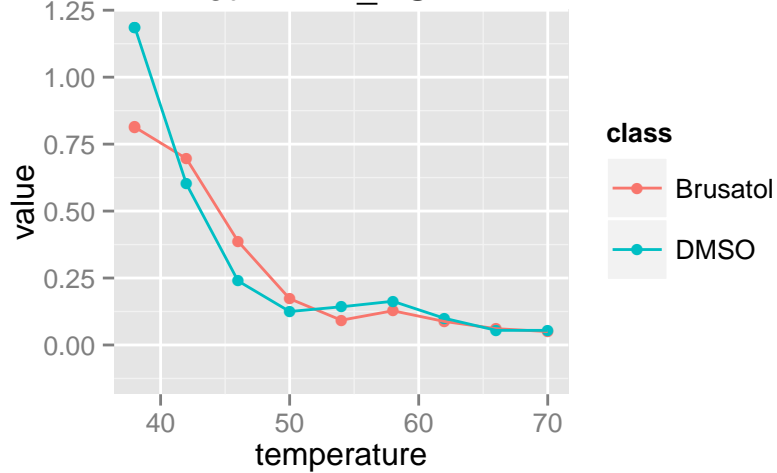

Prot: MLKL\_HUMAN

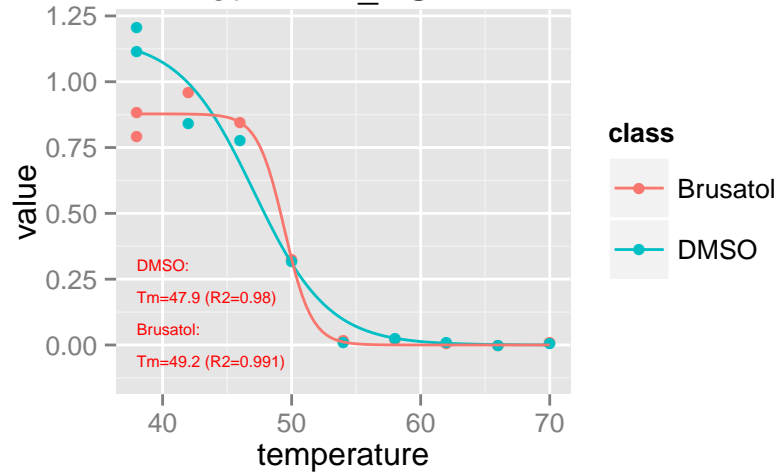

Prot: MLL2\_HUMAN

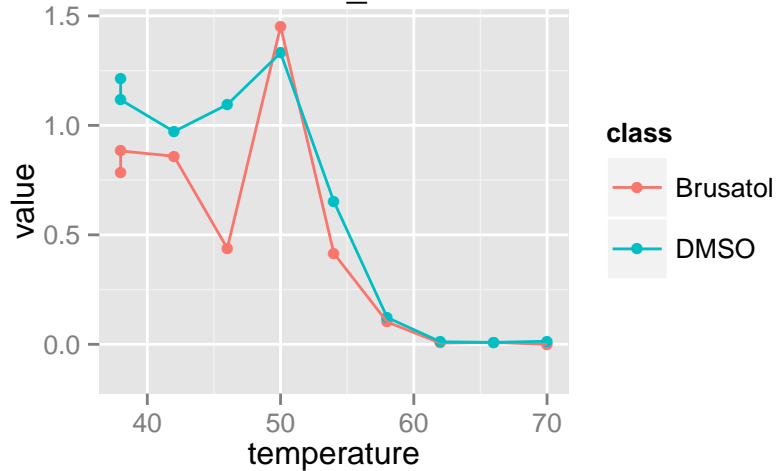

Prot: MLTK\_HUMAN

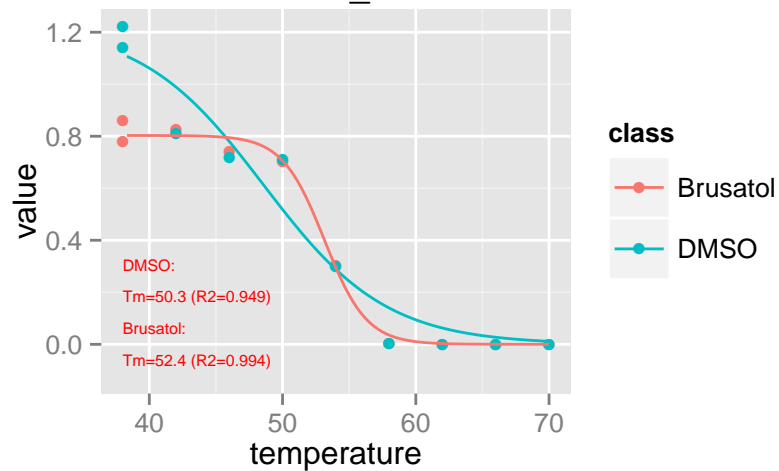

Prot: MMAB\_HUMAN

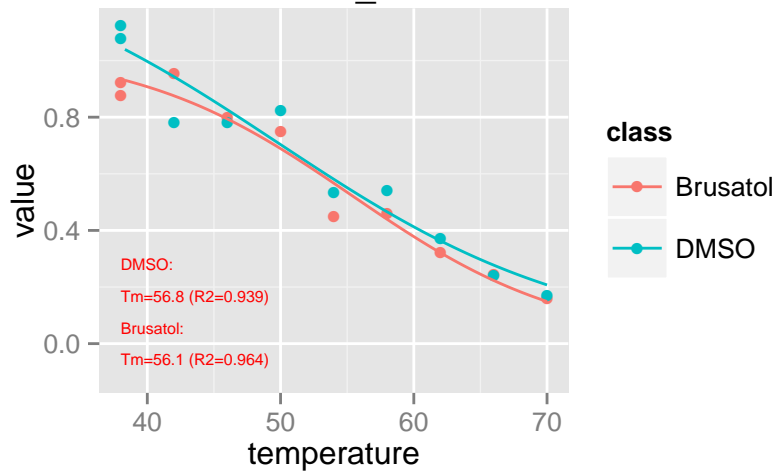

Prot: MMS19\_HUMAN

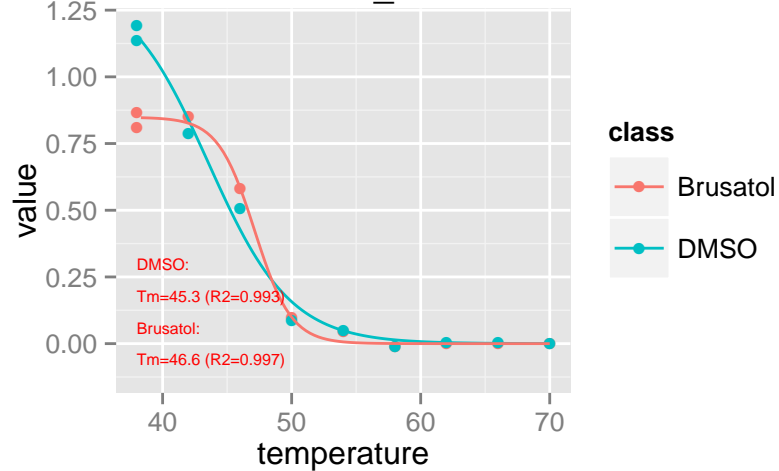

Prot: MMSA\_HUMAN

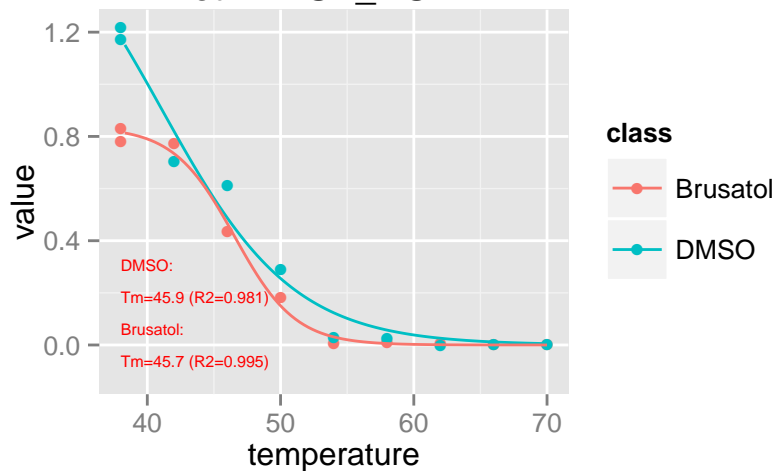

Prot: MO4L1\_HUMAN

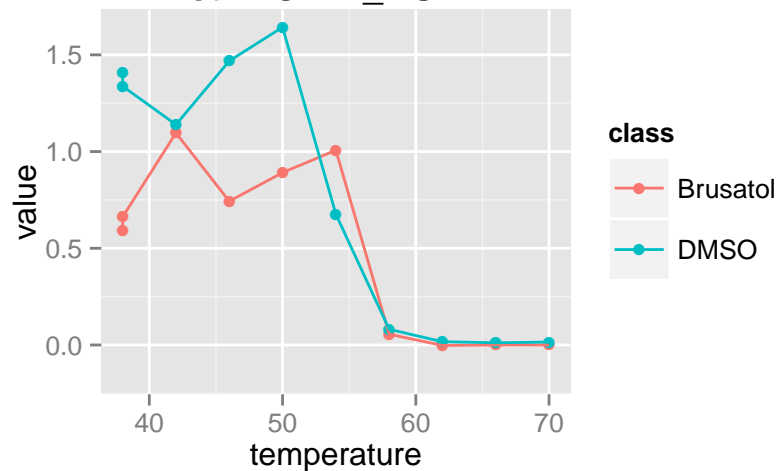

Prot: MOB1A\_HUMAN

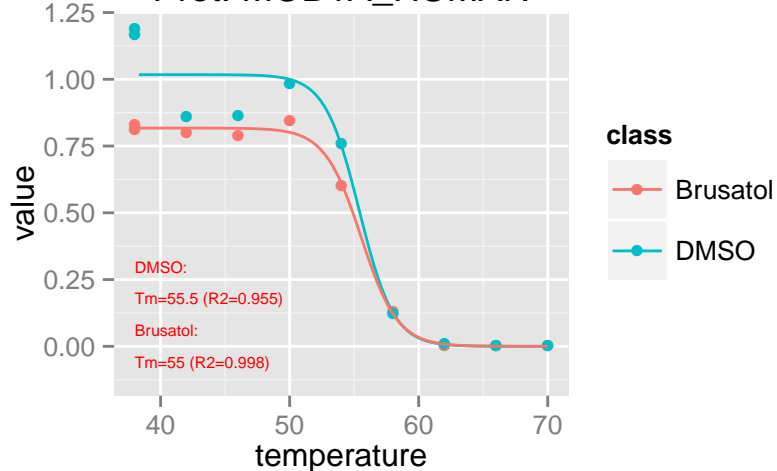

Prot: MOC2A\_HUMAN

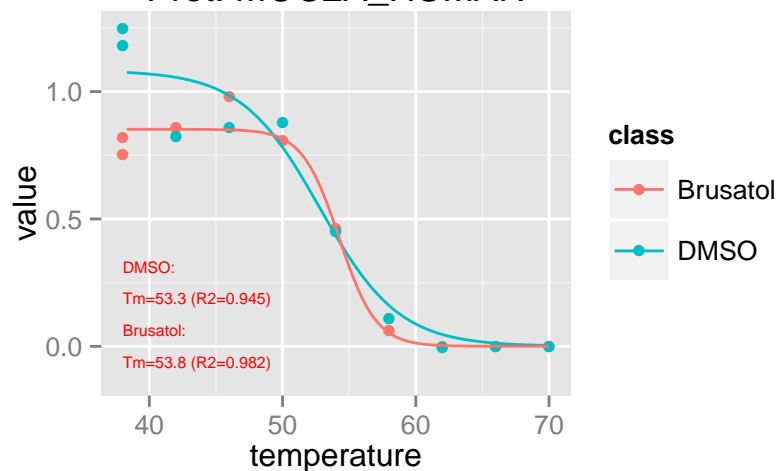

Prot: MOC2B\_HUMAN

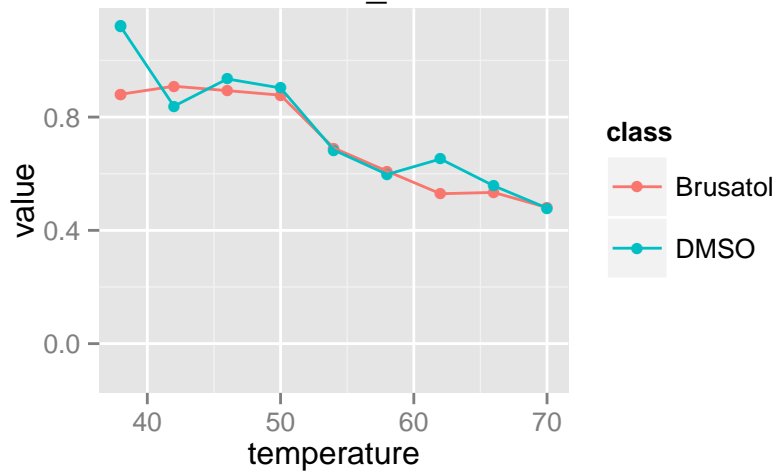

Prot: MOCS3\_HUMAN

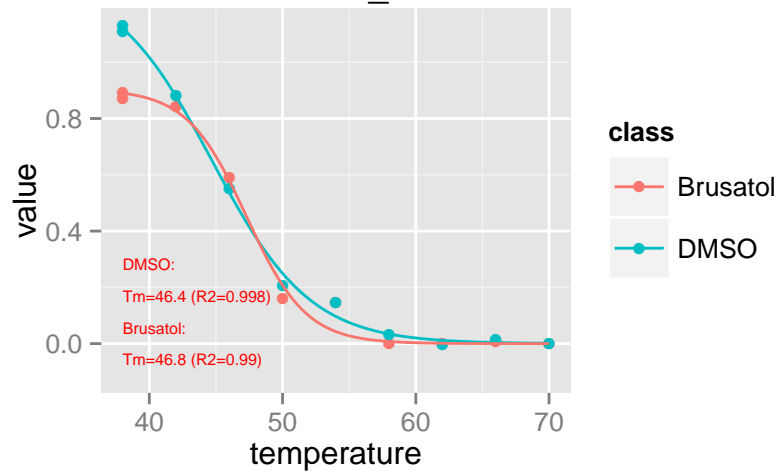

Prot: MOES\_HUMAN

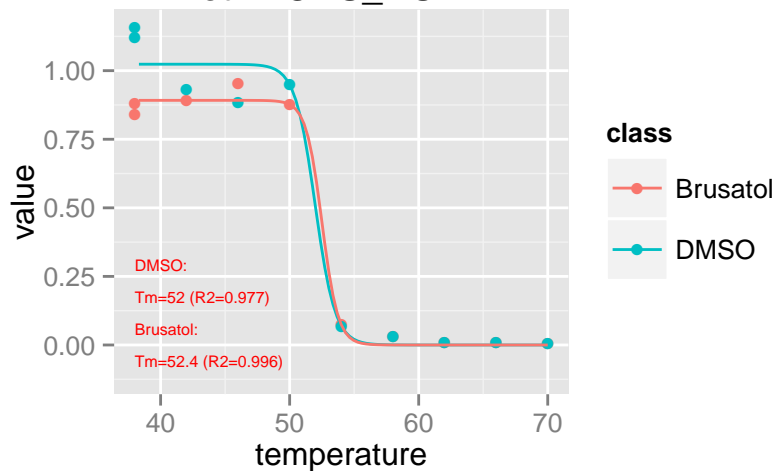

Prot: MOFA1\_HUMAN

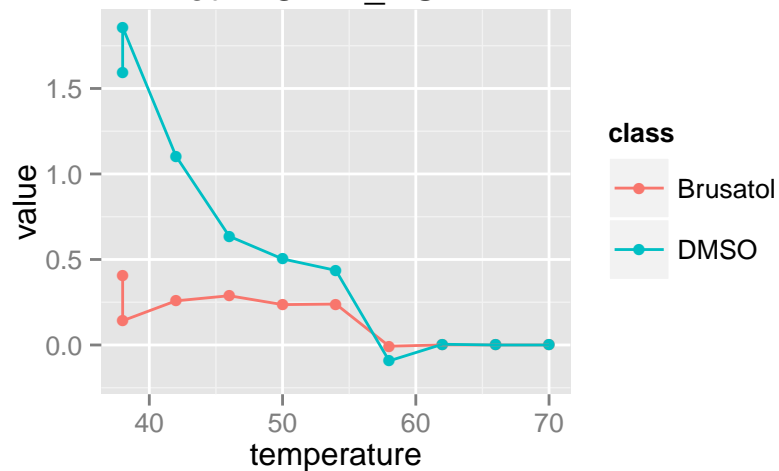

Prot: MOG1\_HUMAN

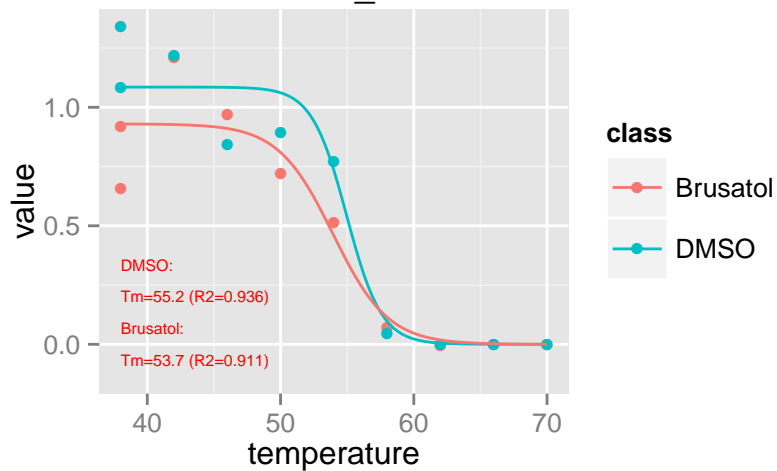

Prot: MON2\_HUMAN

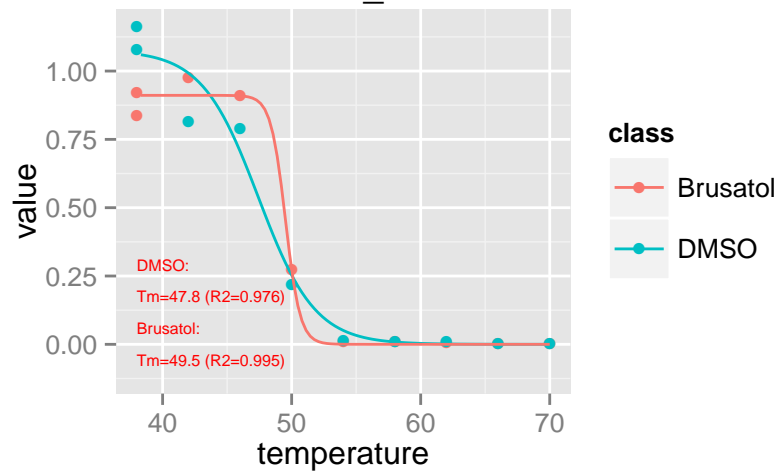

Prot: MP2K1\_HUMAN

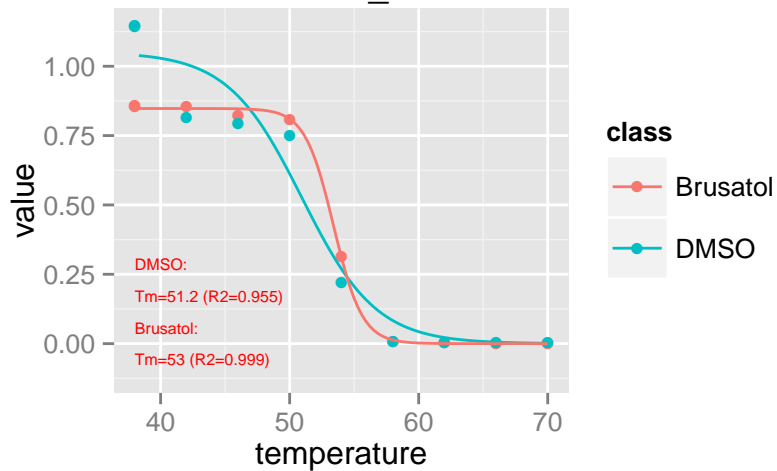

Prot: MP2K2\_HUMAN

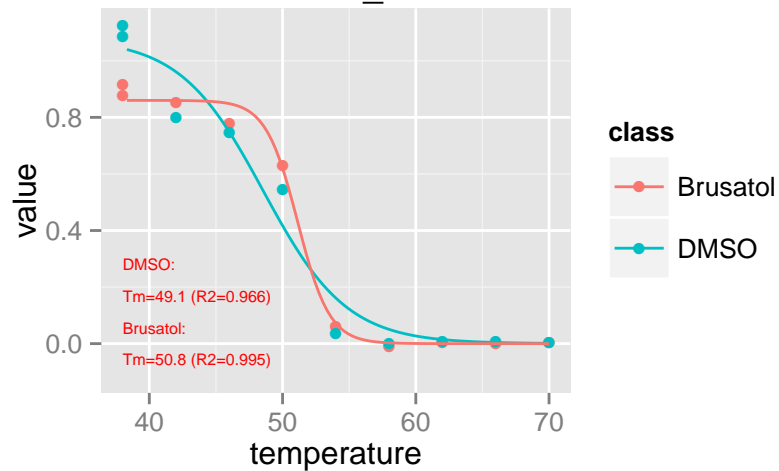

Prot: MP2K3\_HUMAN

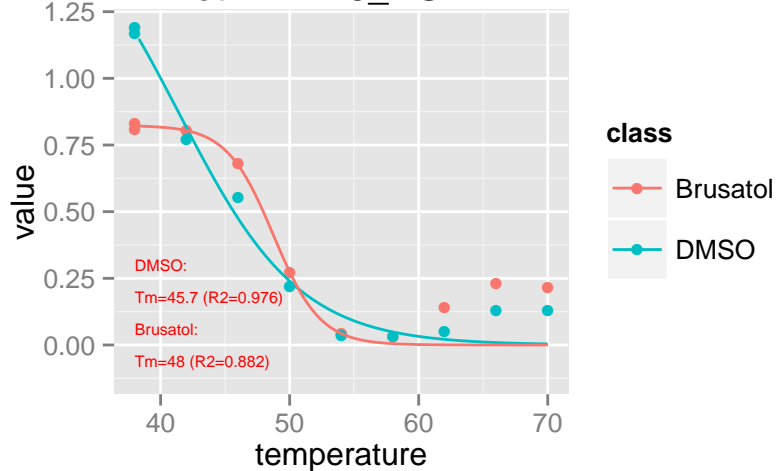

Prot: MP2K4\_HUMAN

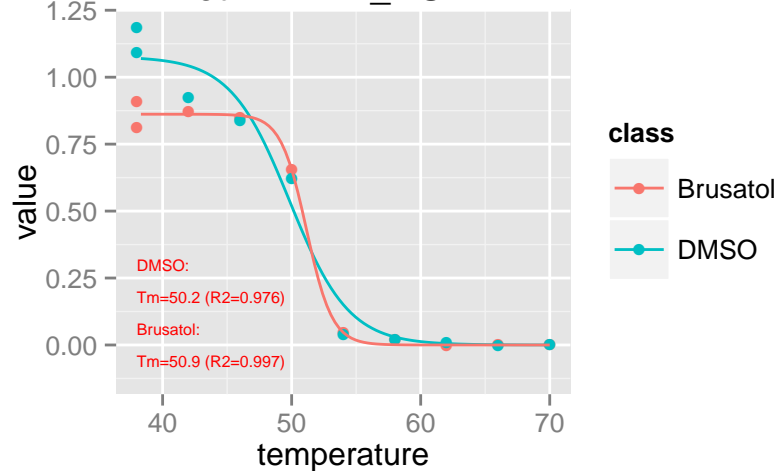

Prot: MP2K6\_HUMAN

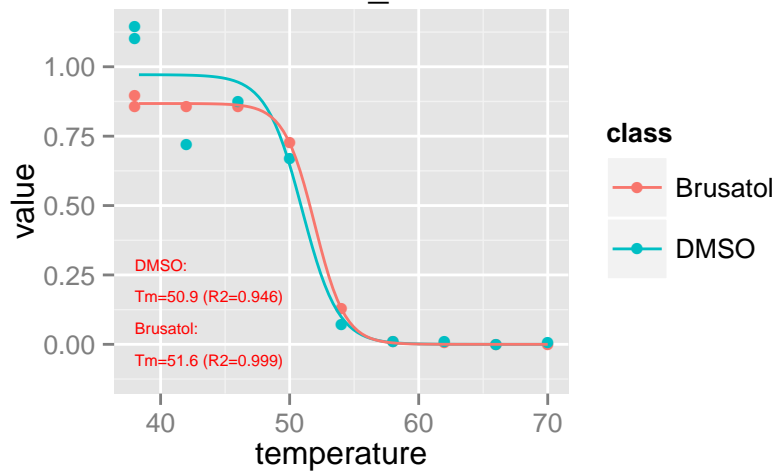

Prot: MPDZ\_HUMAN

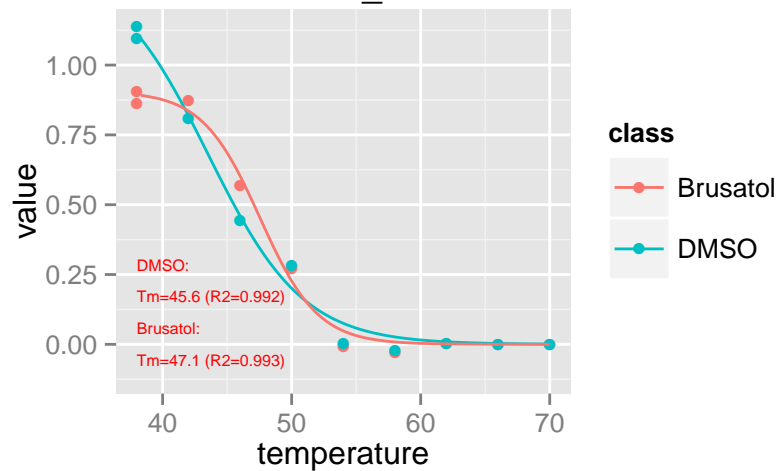



Prot: MPH6\_HUMAN

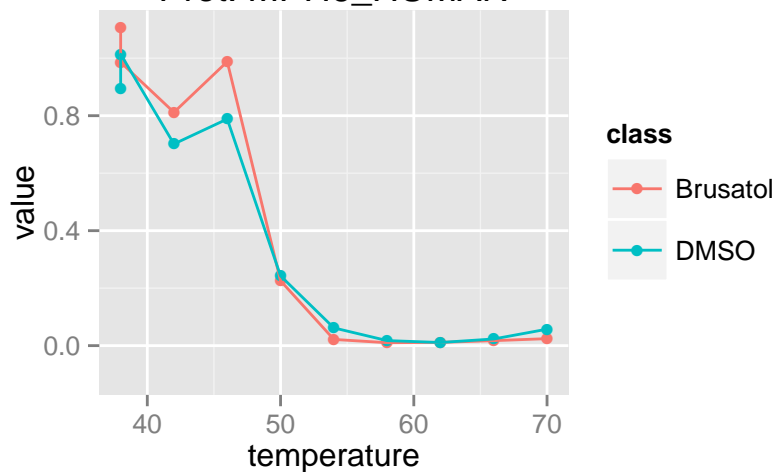

Prot: MPI\_HUMAN

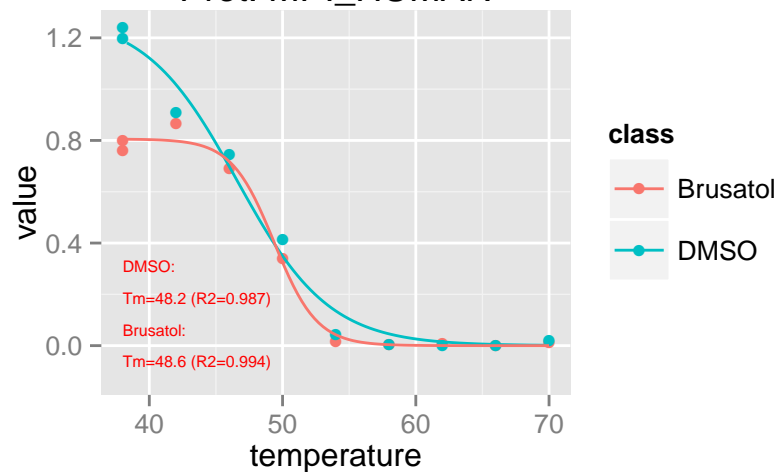

Prot: MPP5\_HUMAN

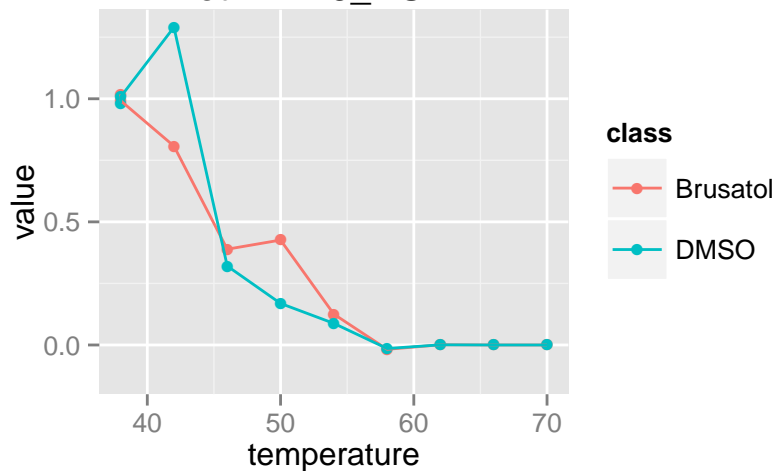

Prot: MPP6\_HUMAN

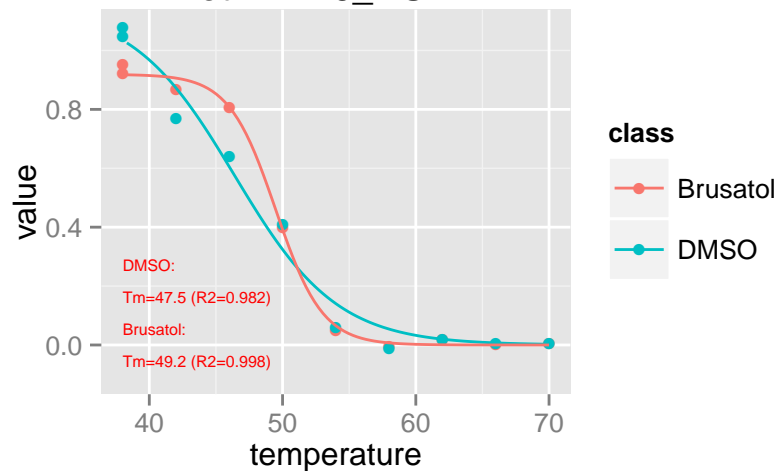

Prot: MPPA\_HUMAN

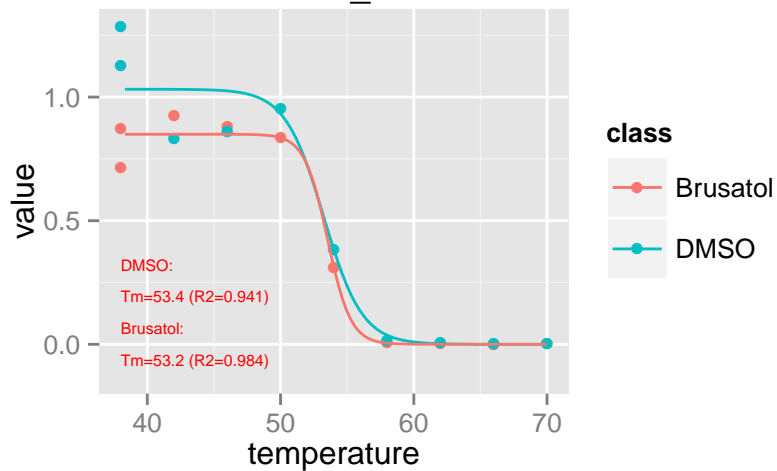

Prot: MPPB\_HUMAN

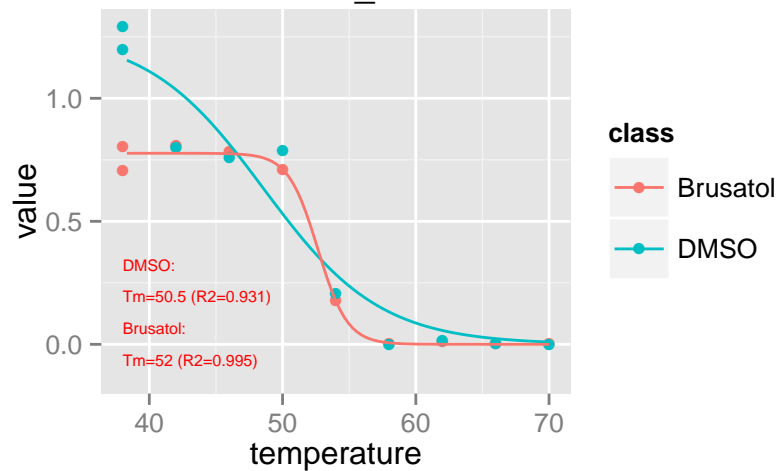

Prot: MPRD\_HUMAN

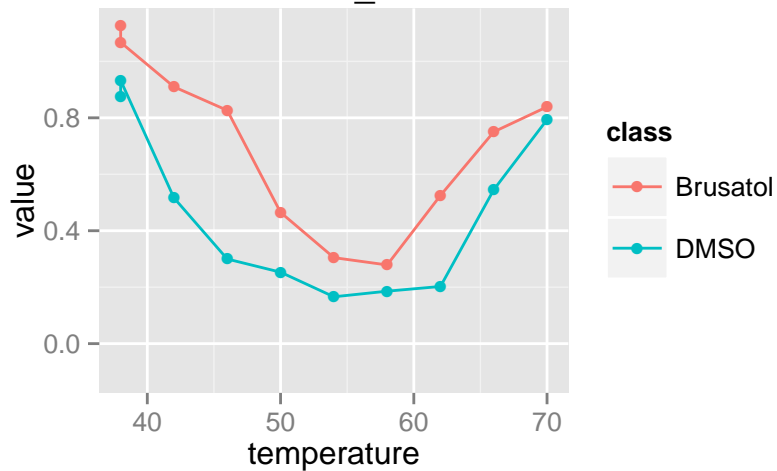

Prot: MPRI\_HUMAN

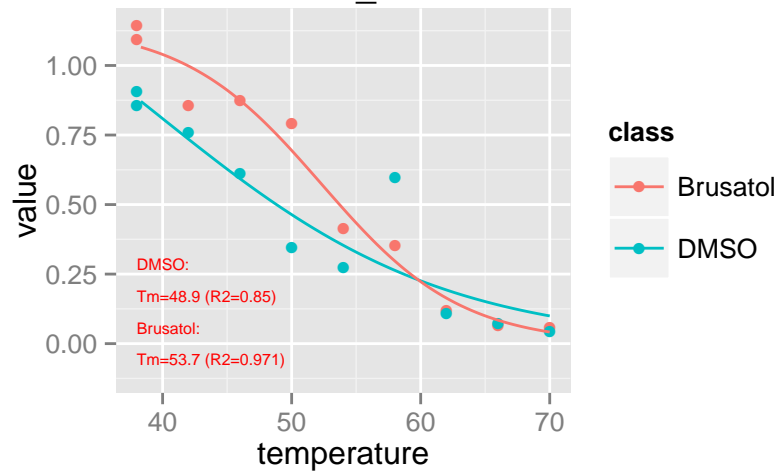

Prot: MPRIP\_HUMAN

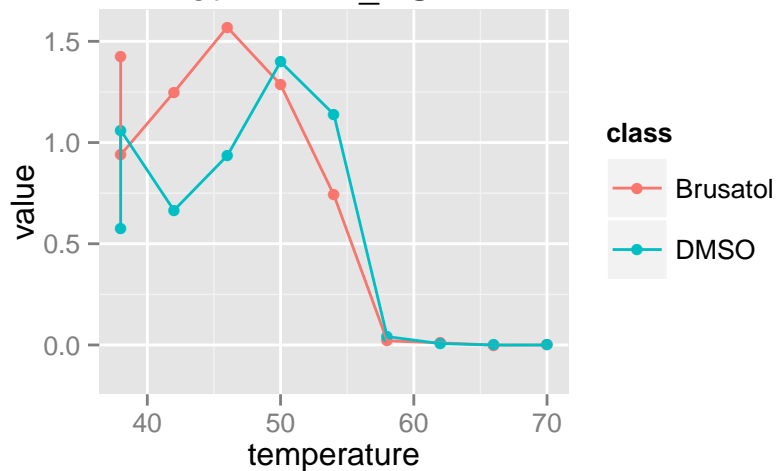

Prot: MRCKA\_HUMAN

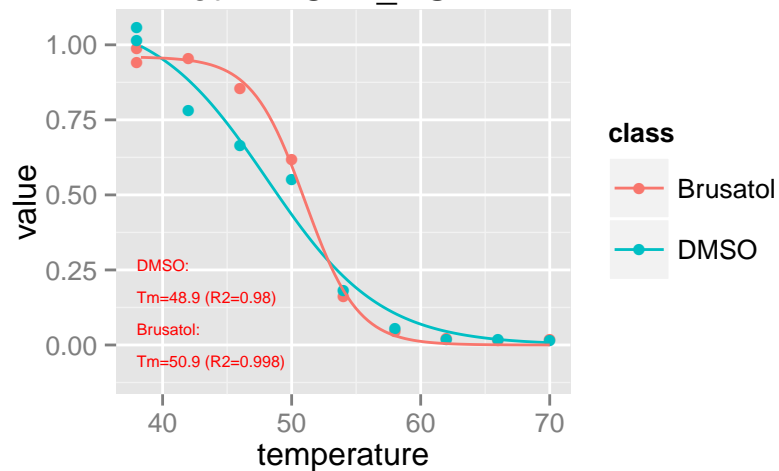

Prot: MRCKB\_HUMAN

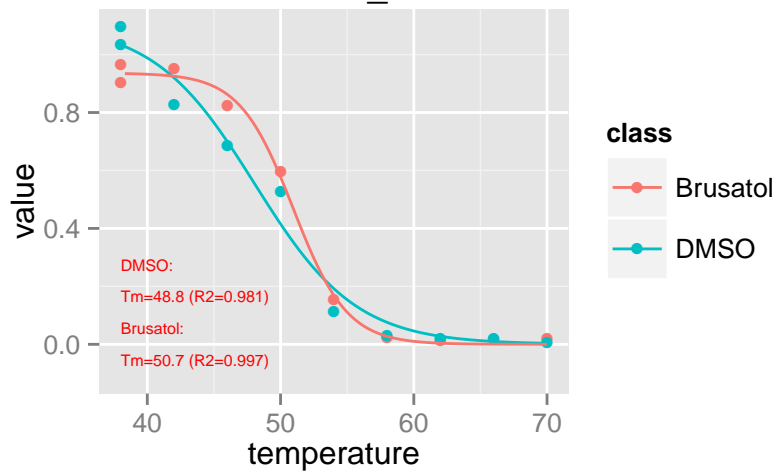

Prot: MRE11\_HUMAN

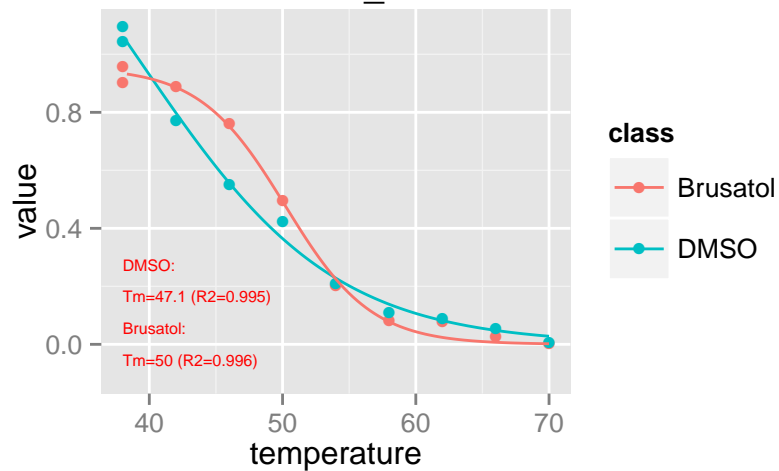

Prot: MRP\_HUMAN

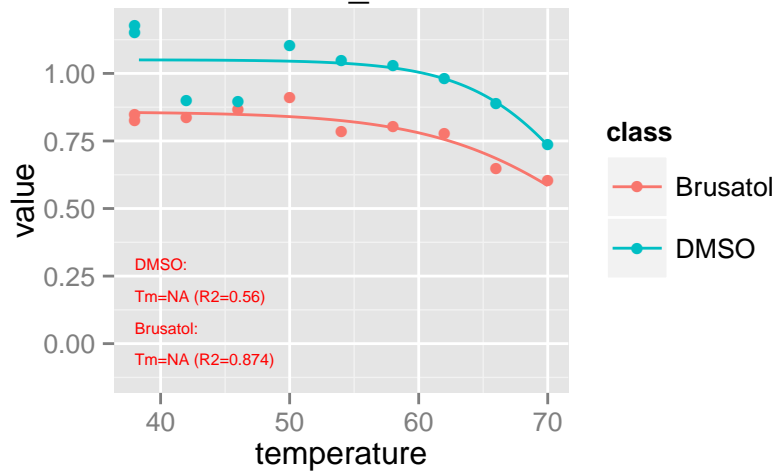

Prot: MRRP1\_HUMAN

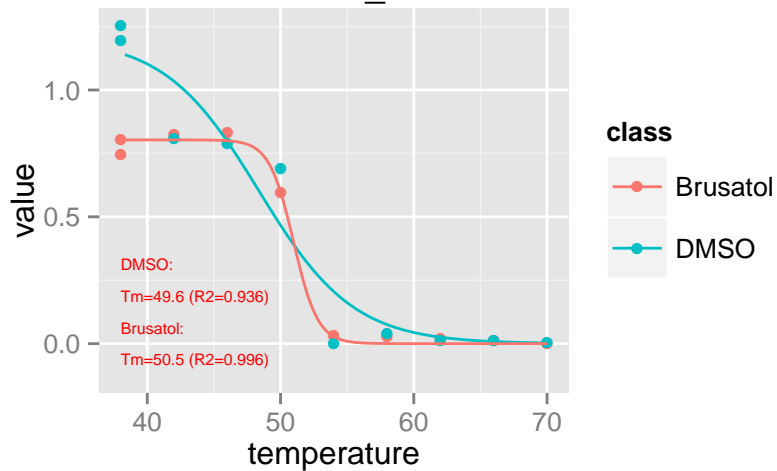

Prot: MSH2\_HUMAN

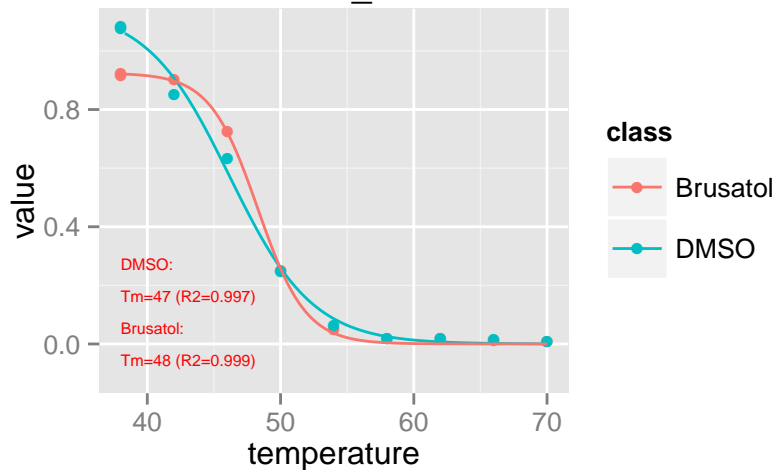

Prot: MSH3\_HUMAN

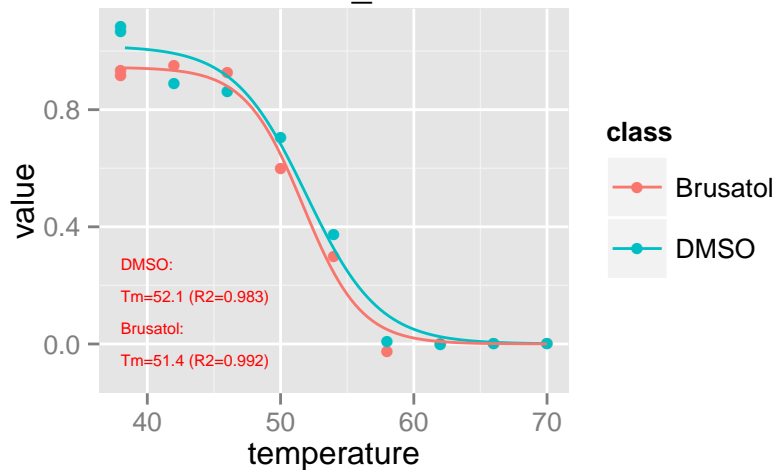

Prot: MSH6\_HUMAN

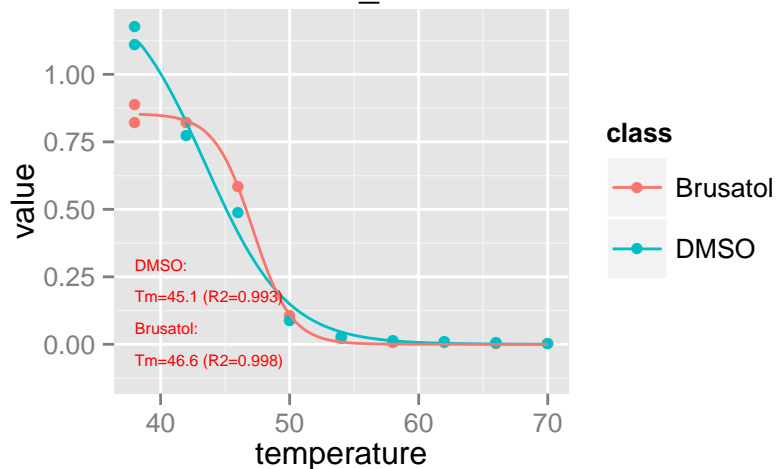

Prot: MSRB3\_HUMAN

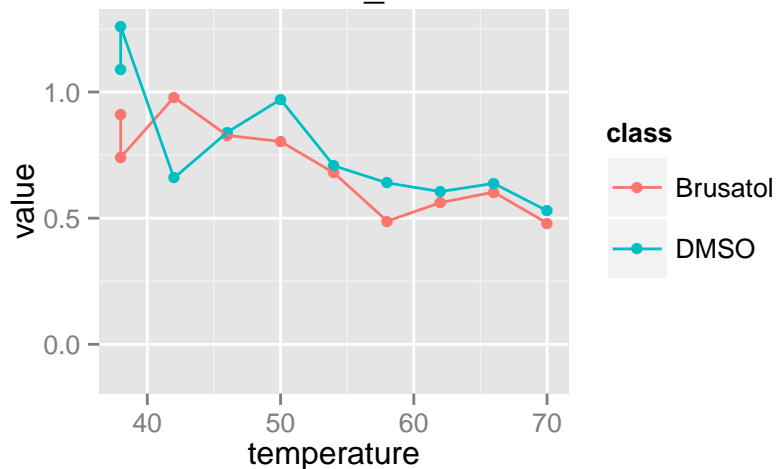

Prot: MST4\_HUMAN

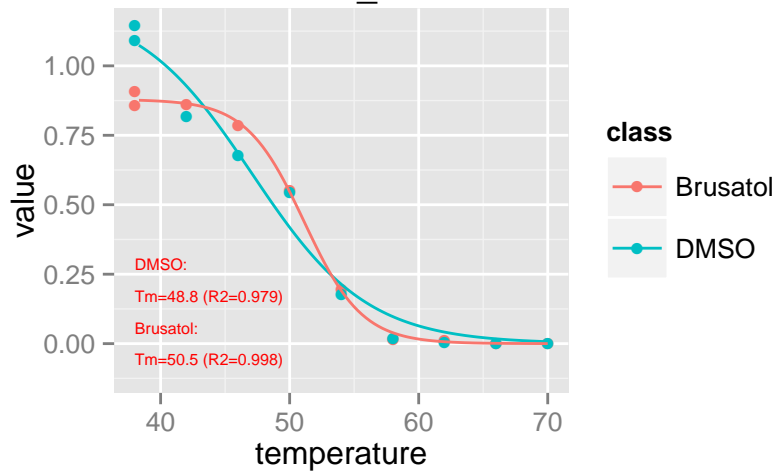

Prot: MSTO1\_HUMAN

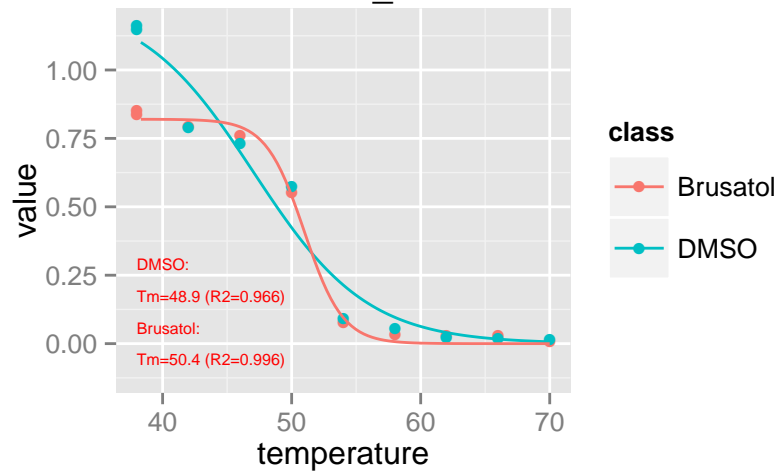

Prot: MT1E\_HUMAN

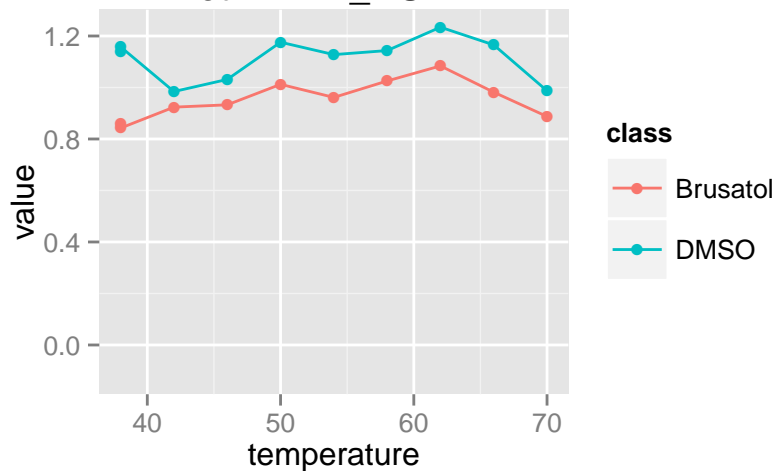

Prot: MT2\_HUMAN

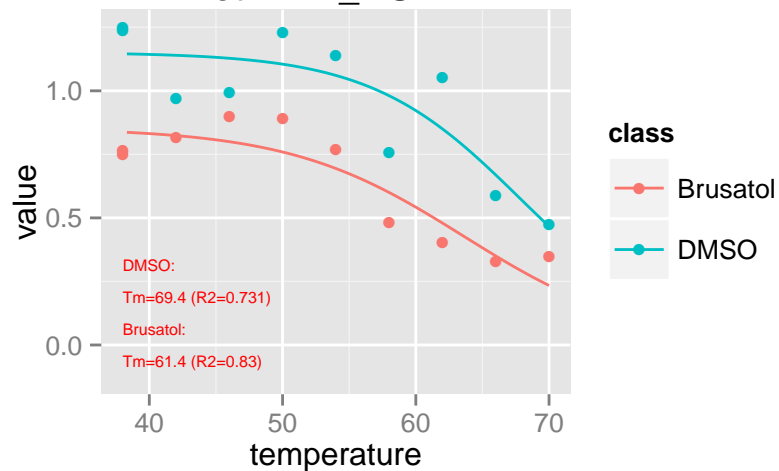

Prot: MTA1\_HUMAN

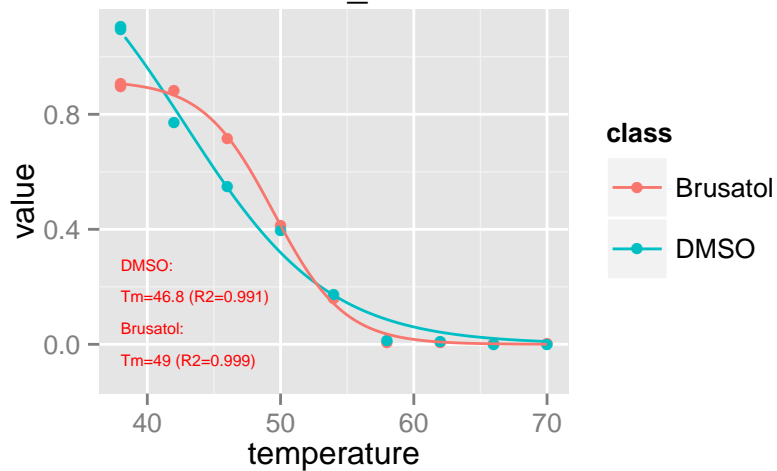

Prot: MTA2\_HUMAN

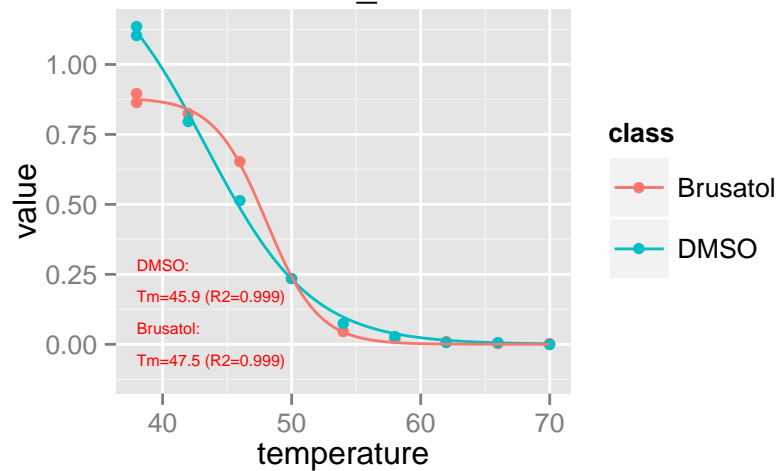

Prot: MTA70\_HUMAN

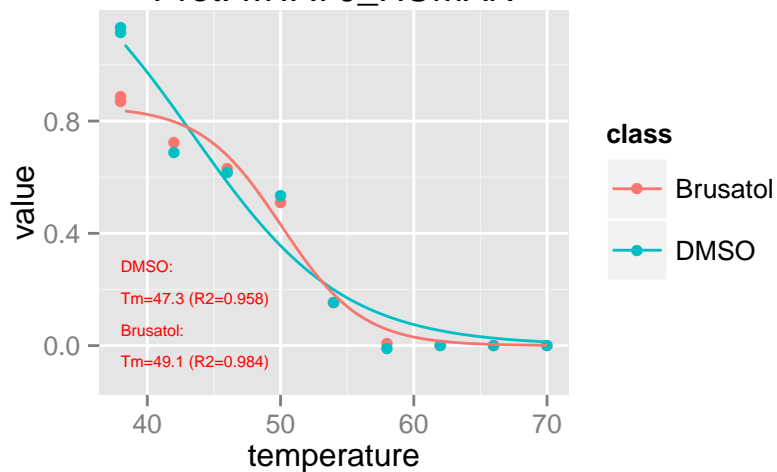

Prot: MTCNB\_HUMAN

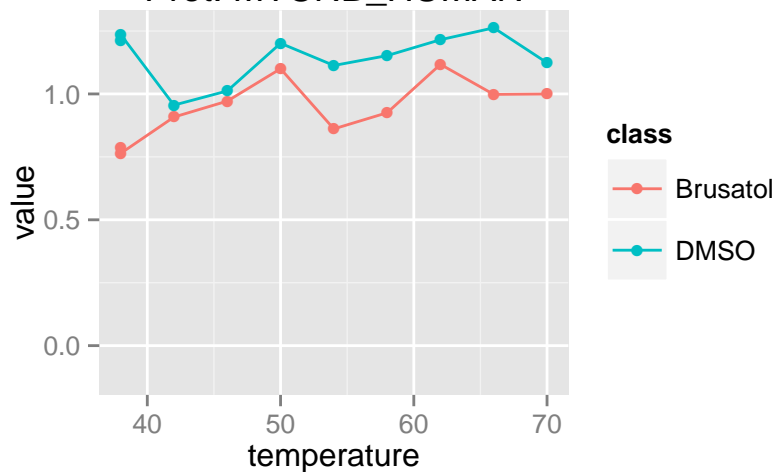

Prot: MTDC\_HUMAN

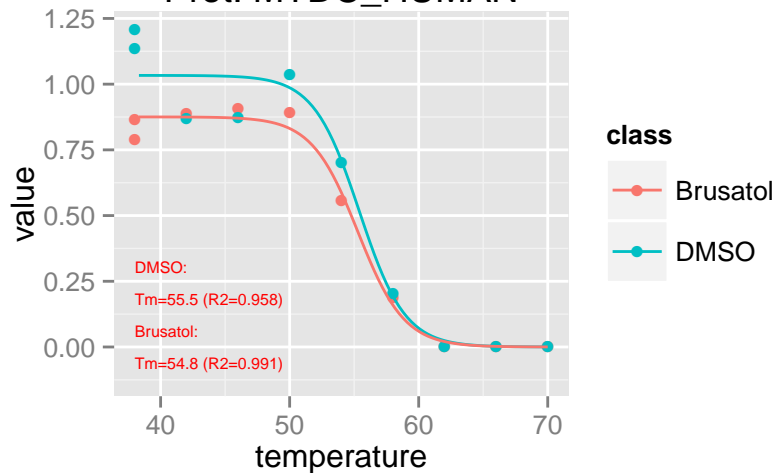

Prot: MTHFS\_HUMAN

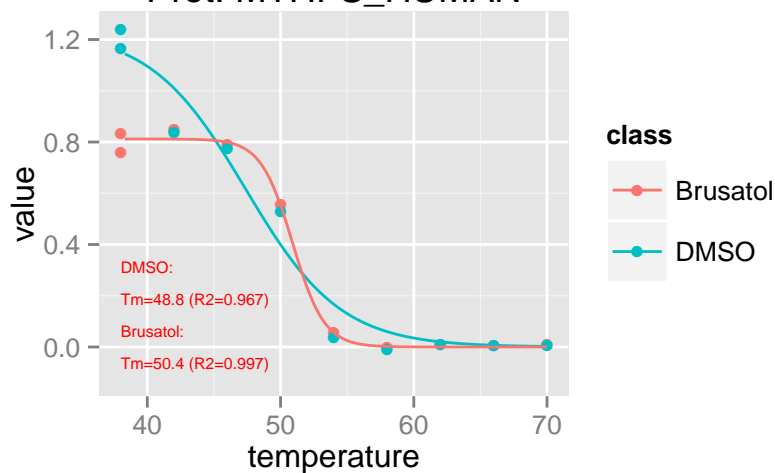

Prot: MTL13\_HUMAN

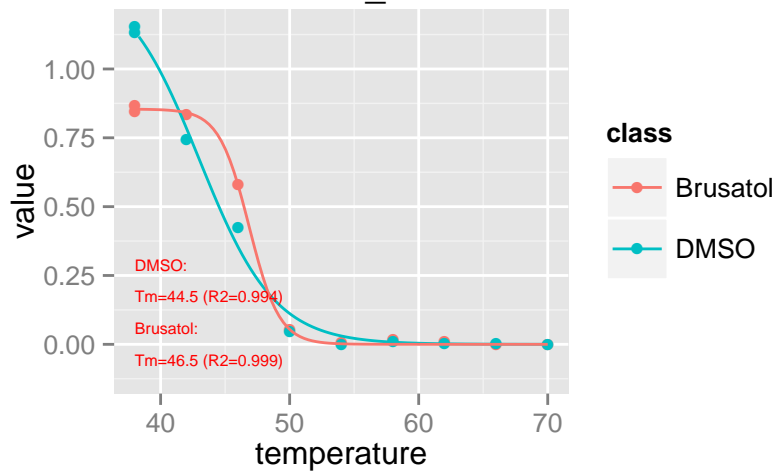

Prot: MTL14\_HUMAN

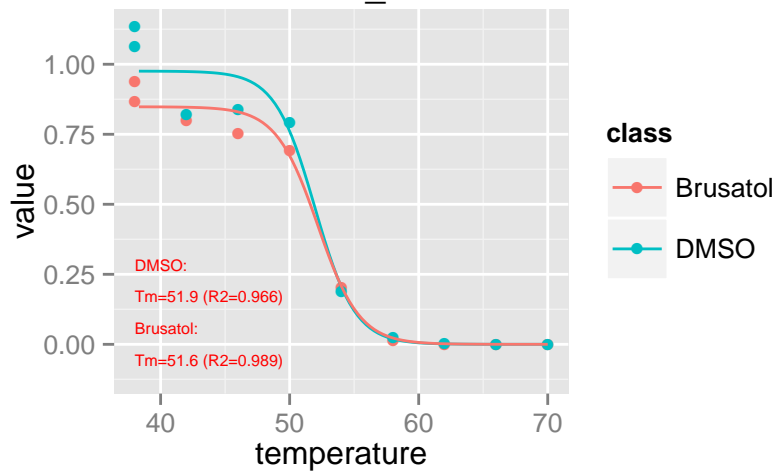

Prot: MTL2A\_HUMAN

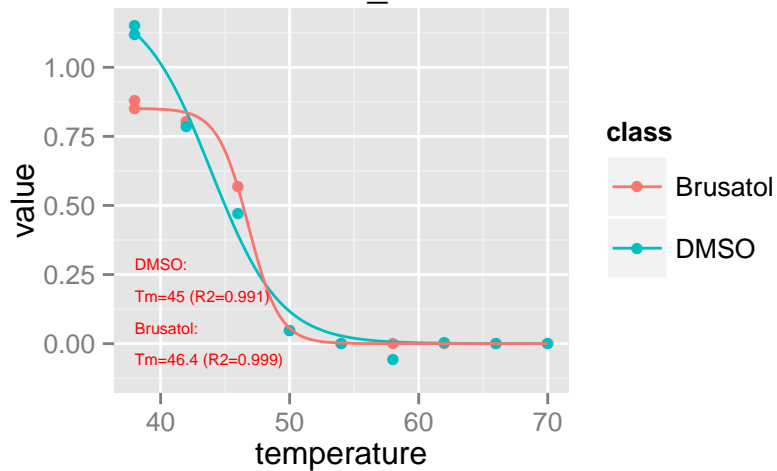

Prot: MTMR1\_HUMAN

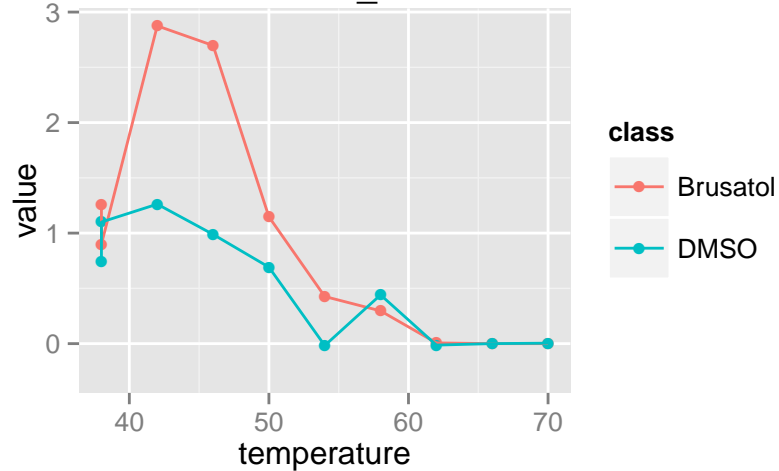

Prot: MTNA\_HUMAN

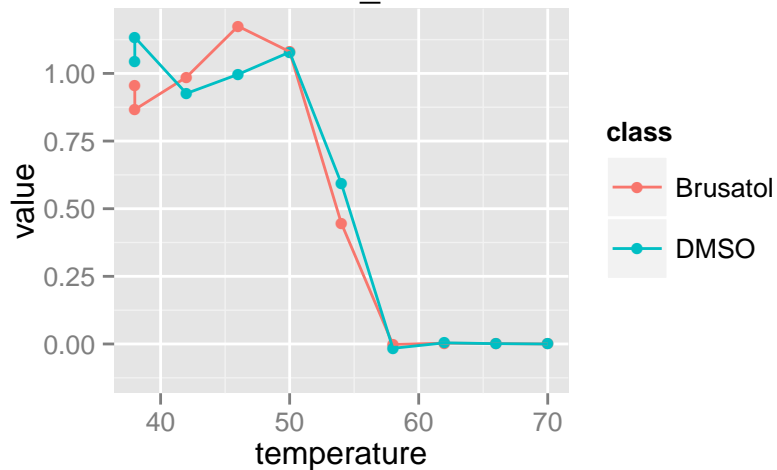

Prot: MTNB\_HUMAN

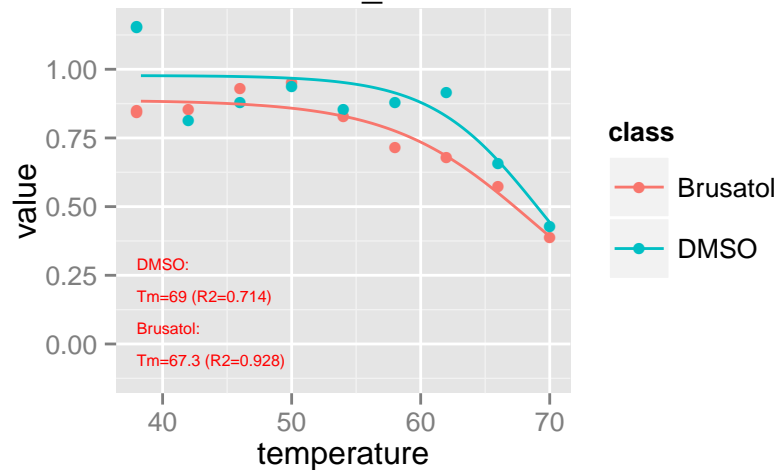

Prot: MTND\_HUMAN

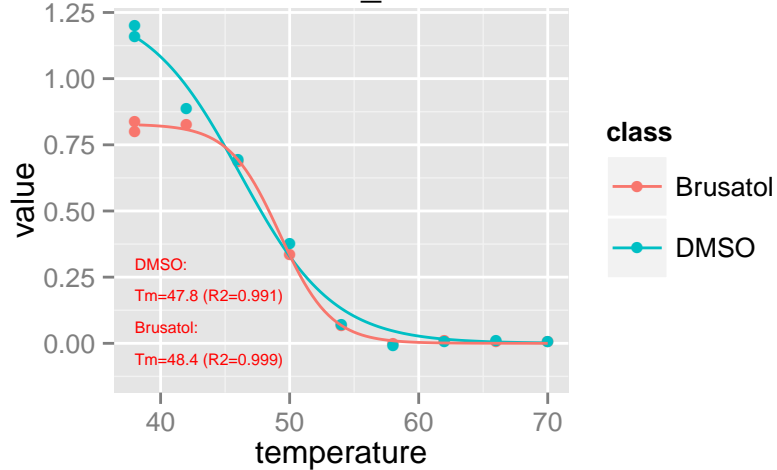

Prot: MTOR\_HUMAN

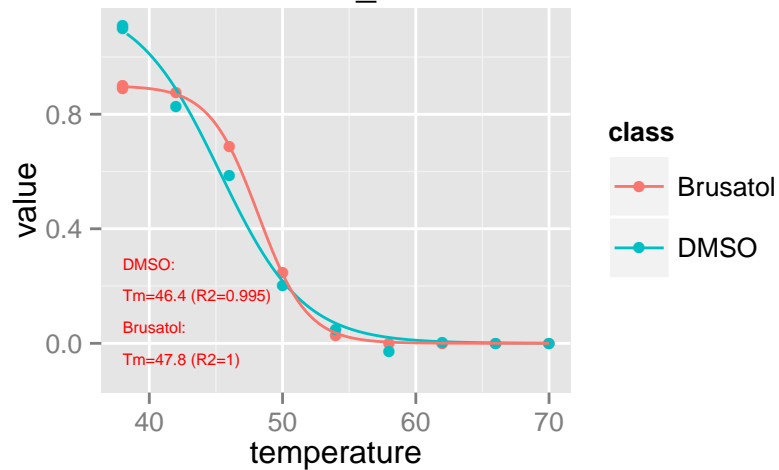

Prot: MTPN\_HUMAN

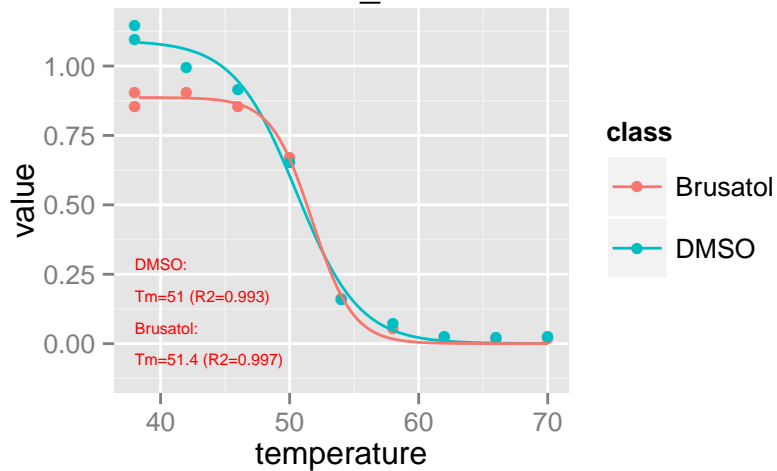

Prot: MTR1\_HUMAN

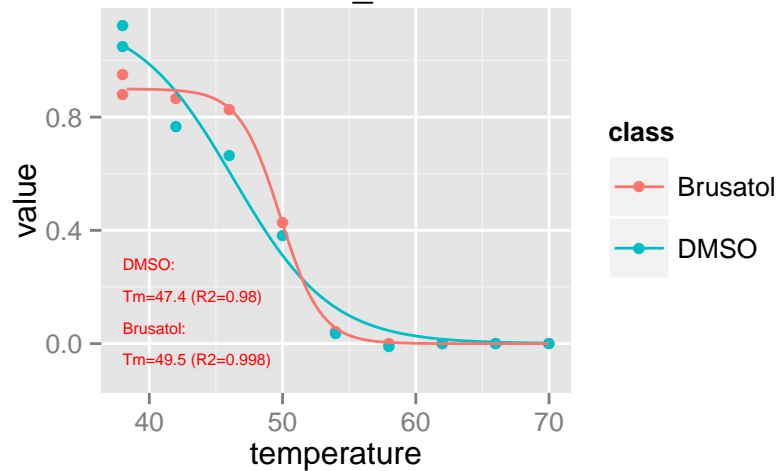

Prot: MTRR\_HUMAN

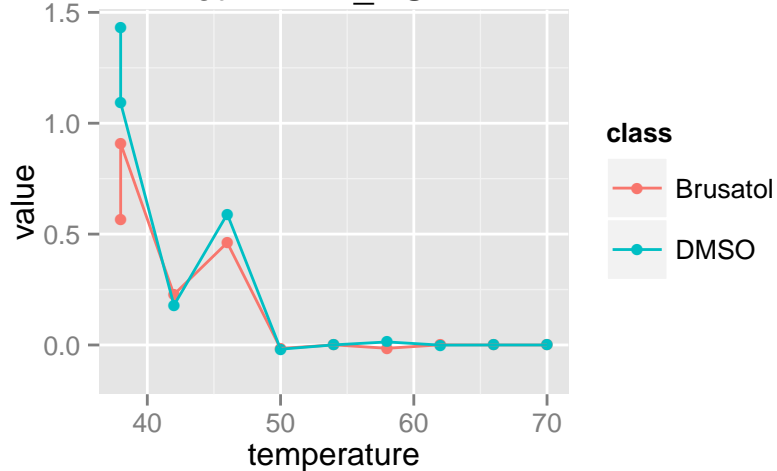

Prot: MTUS1\_HUMAN

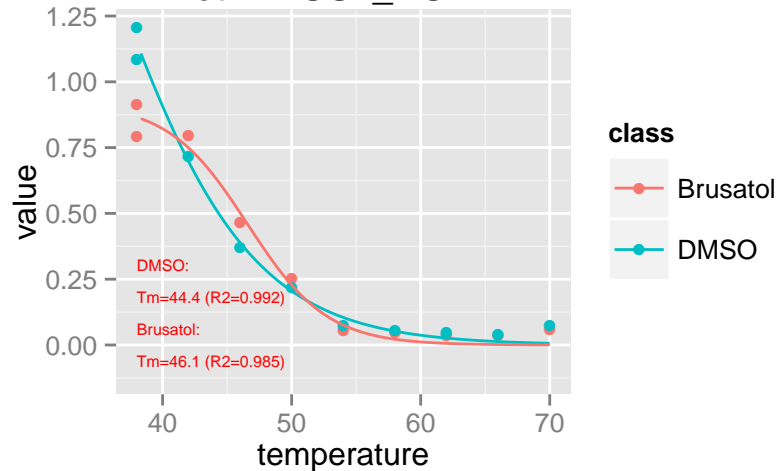

Prot: MUC5A\_HUMAN

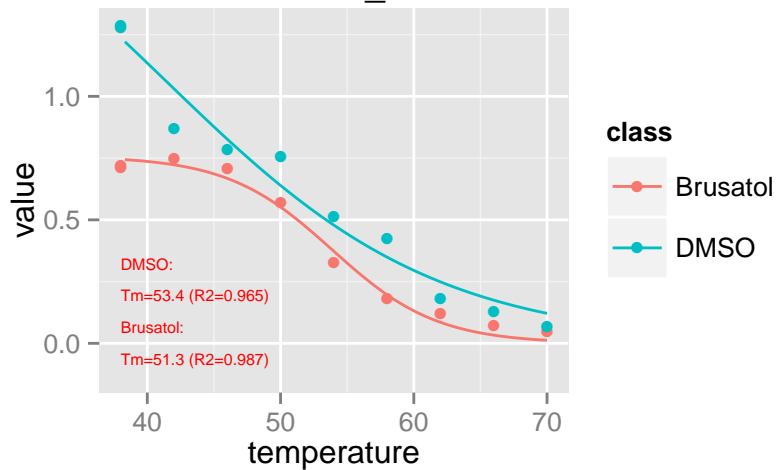

Prot: MUTA\_HUMAN

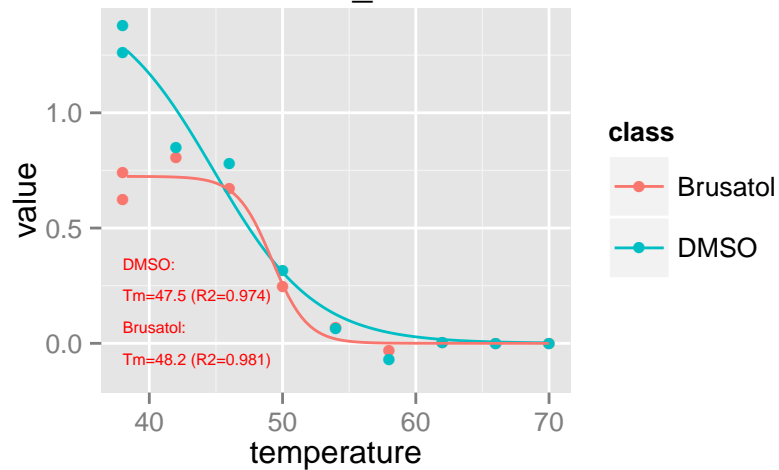

Prot: MUTED\_HUMAN

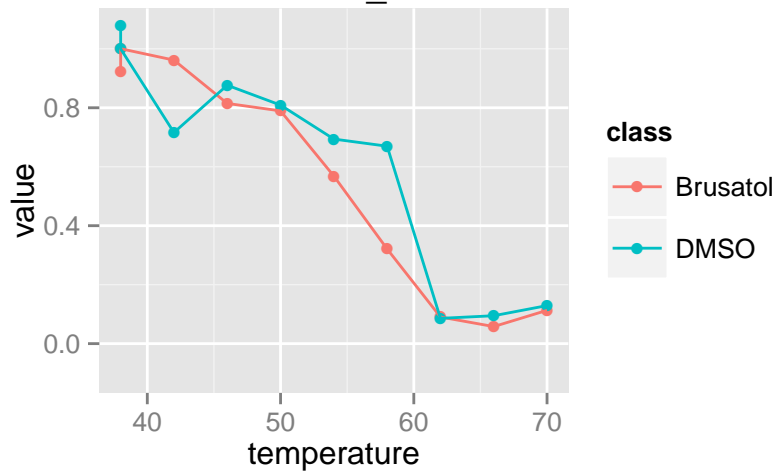

Prot: MVD1\_HUMAN

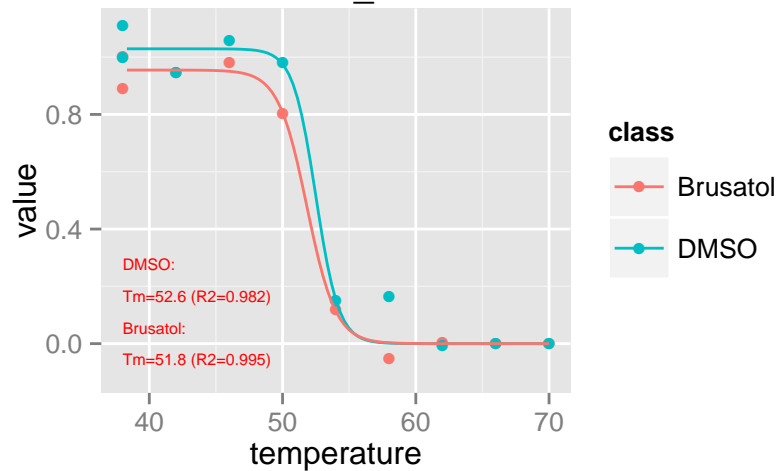

Prot: MVP\_HUMAN

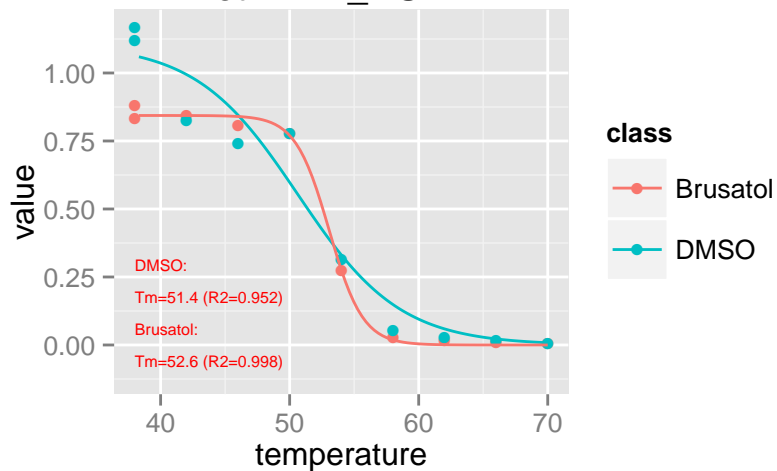

Prot: MYCBP\_HUMAN

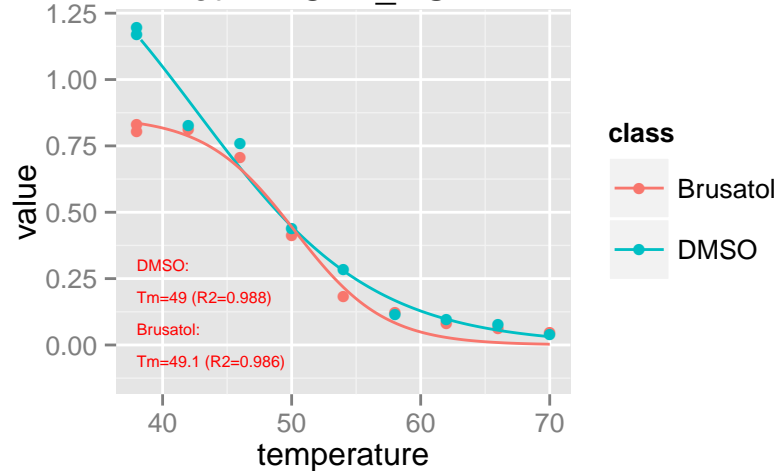

Prot: MYD88\_HUMAN

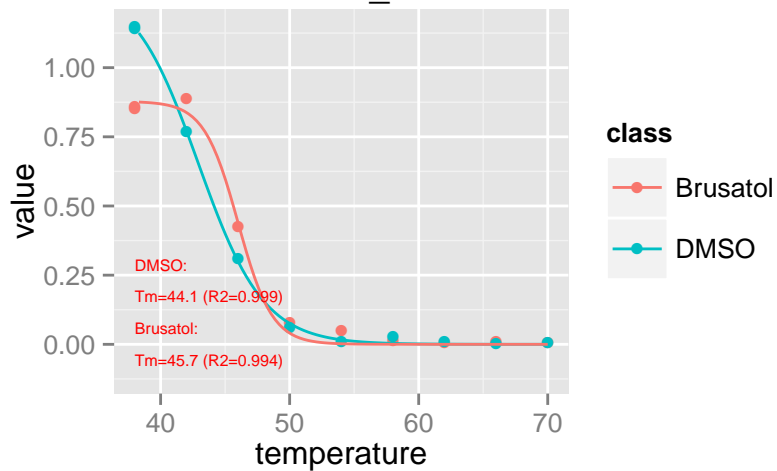

Prot: MYG1\_HUMAN

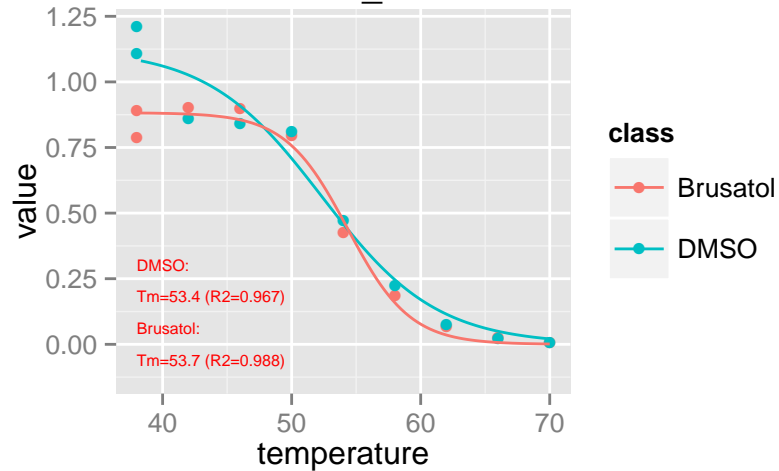



Prot: MYH10\_HUMAN

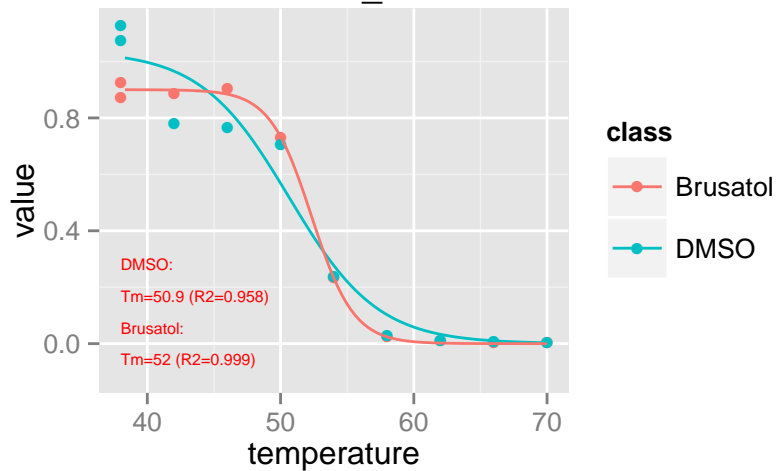

Prot: MYH11\_HUMAN

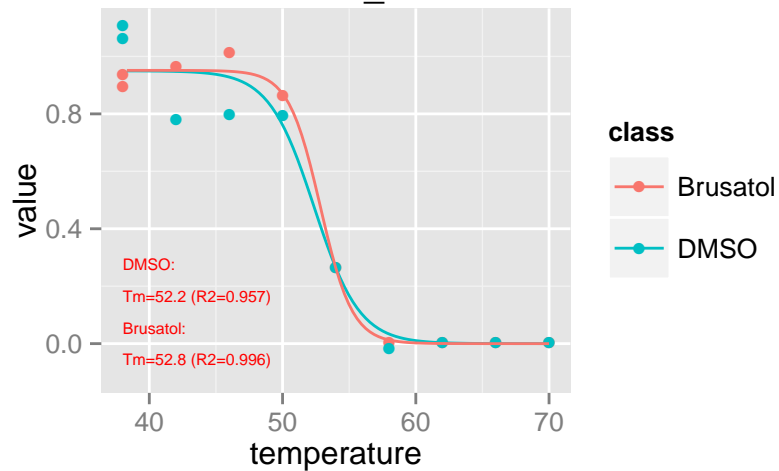

Prot: MYH14\_HUMAN

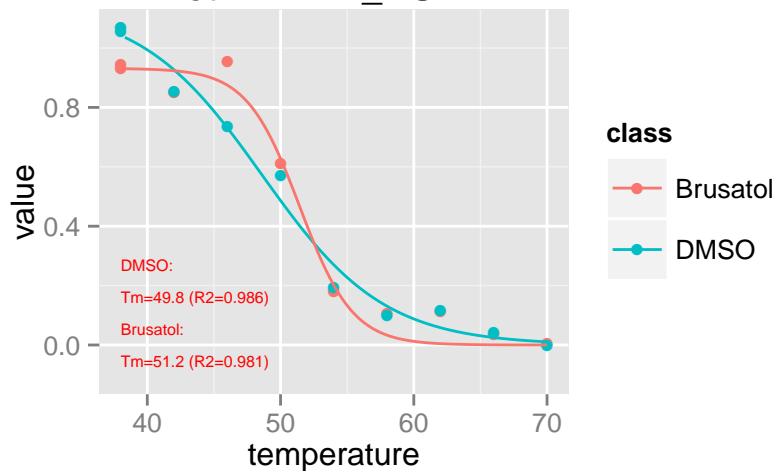

Prot: MYH9\_HUMAN

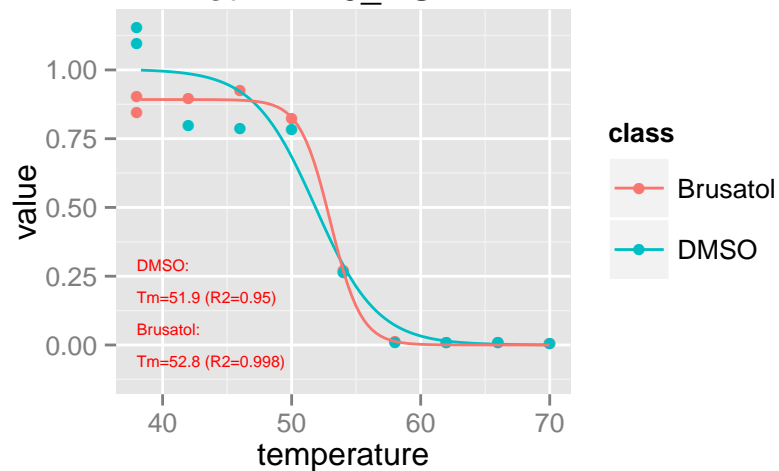

Prot: MYL6\_HUMAN

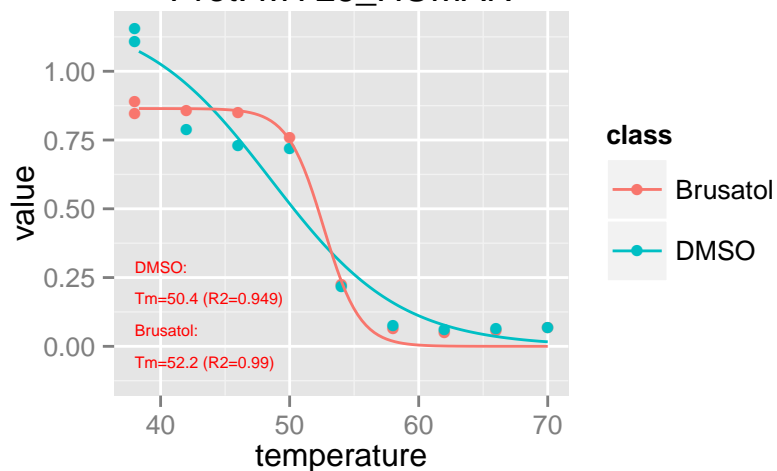

Prot: MYL6B\_HUMAN

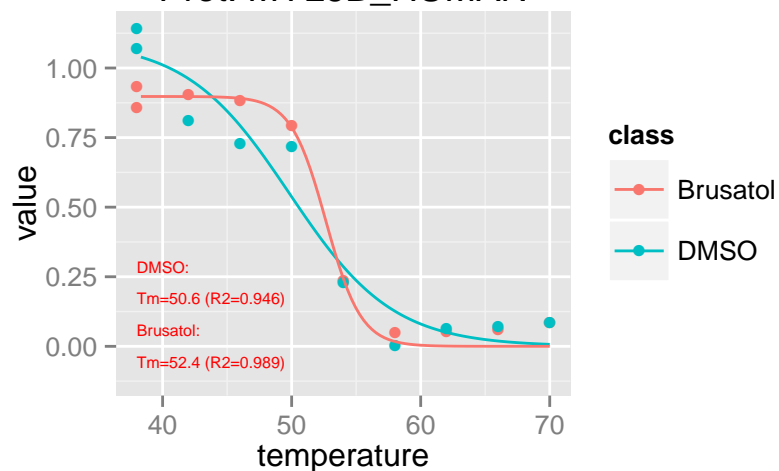

Prot: MYO10\_HUMAN

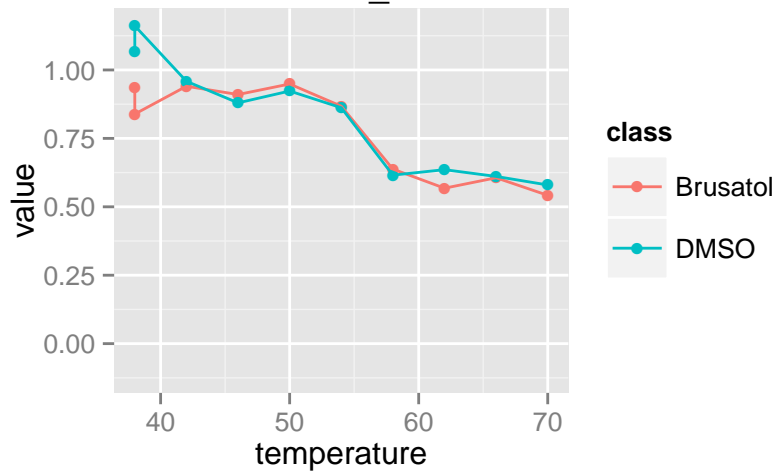

Prot: MYO1A\_HUMAN

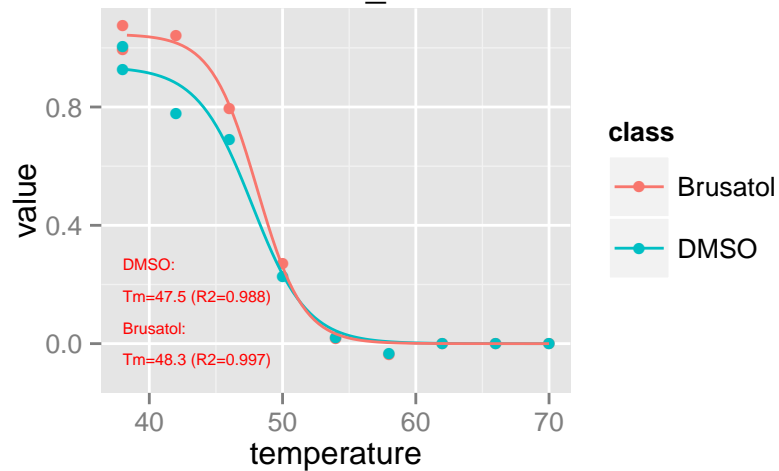

Prot: MYO1B\_HUMAN

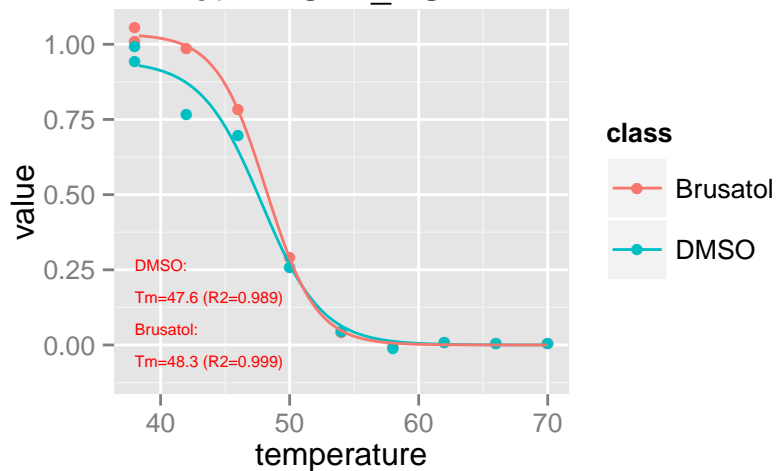

Prot: MYO1C\_HUMAN

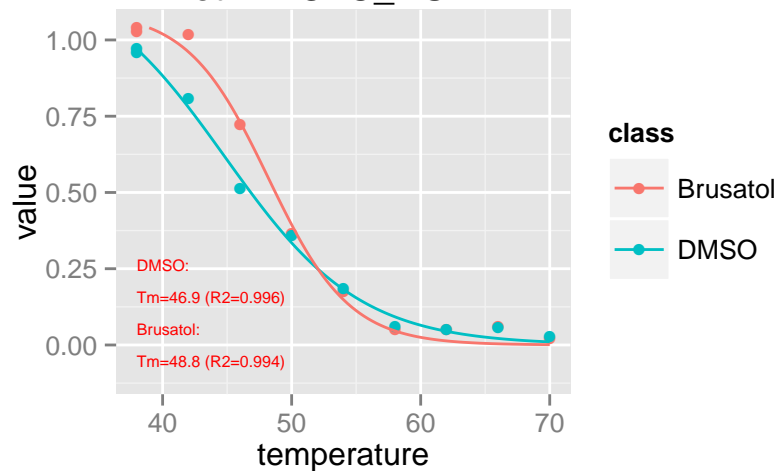

Prot: MYO1E\_HUMAN

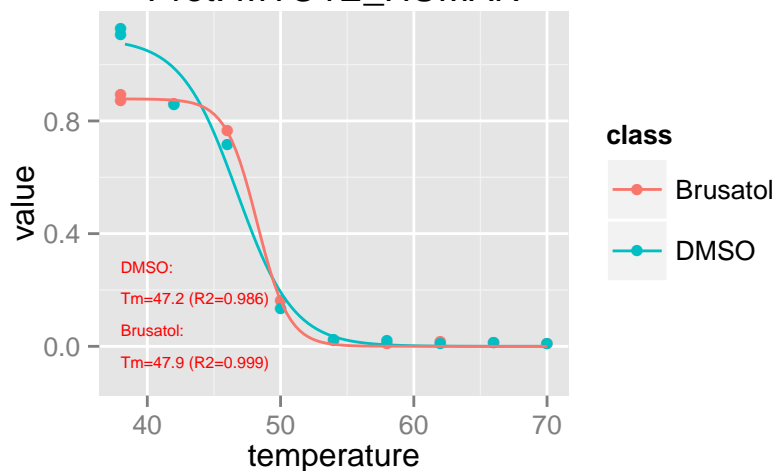

Prot: MYO5A\_HUMAN

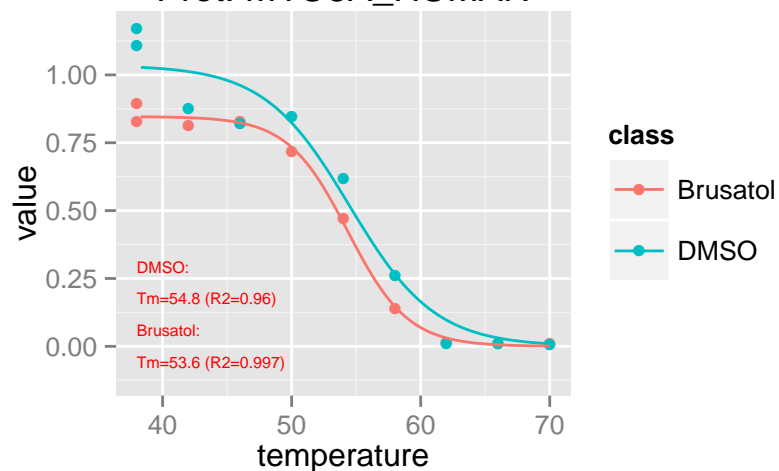

Prot: MYO6\_HUMAN

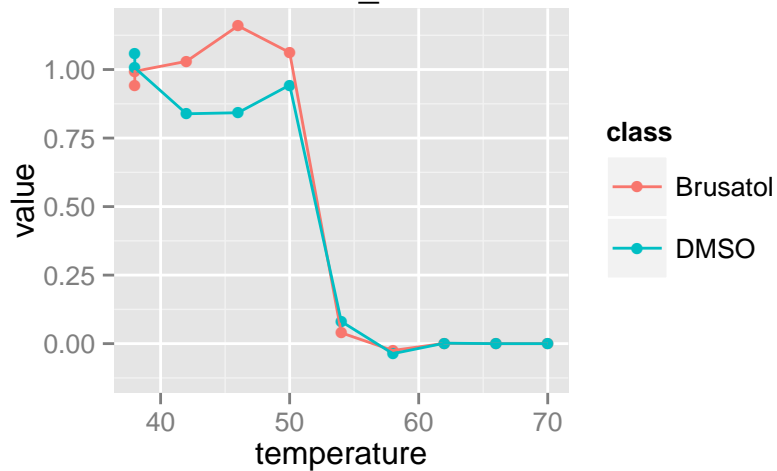

Prot: MYO9B\_HUMAN

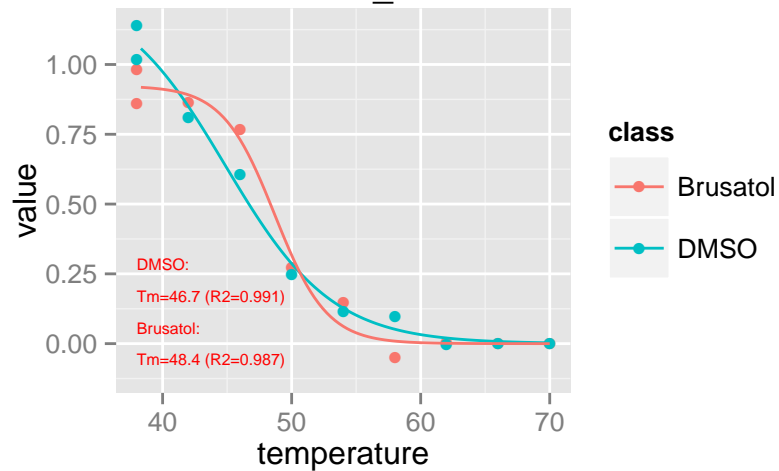

Prot: MYOF\_HUMAN

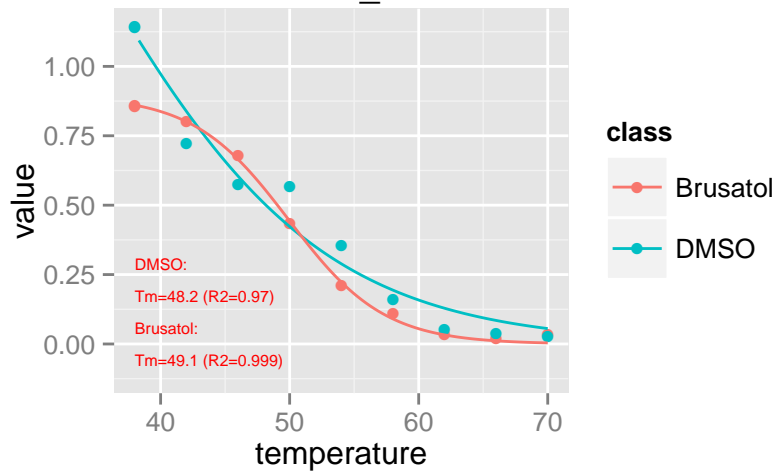

Prot: MYPT1\_HUMAN

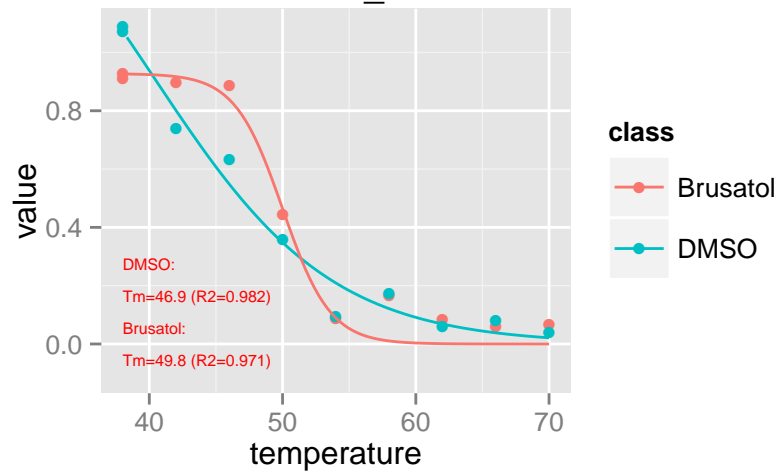

Prot: MZT2A\_HUMAN

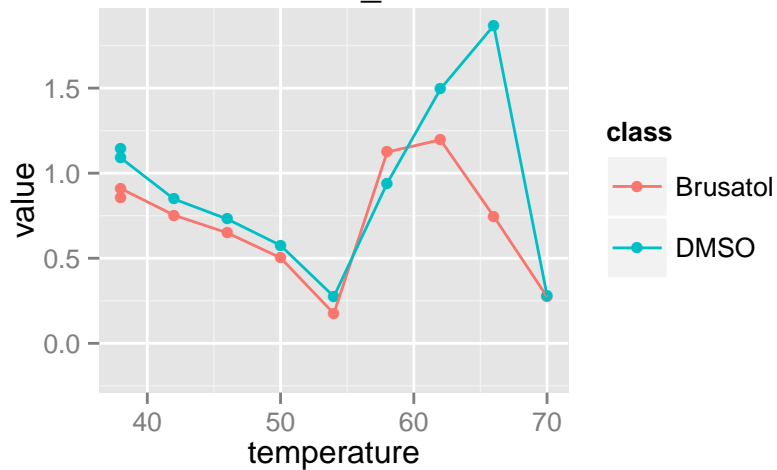

Prot: N4BP1\_HUMAN

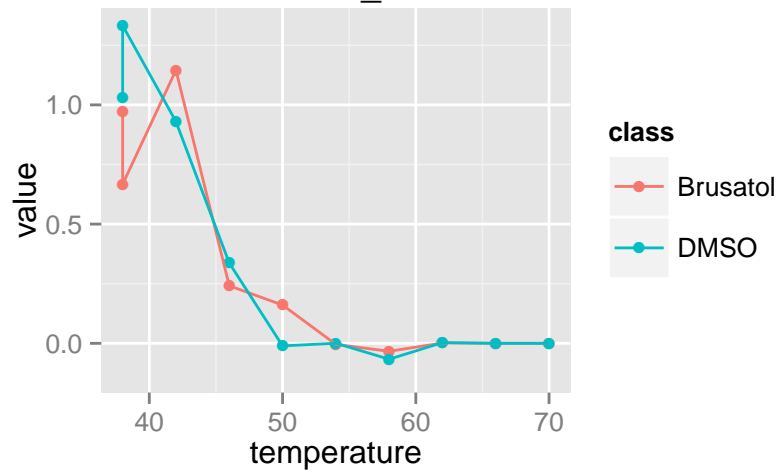

Prot: NAA10\_HUMAN

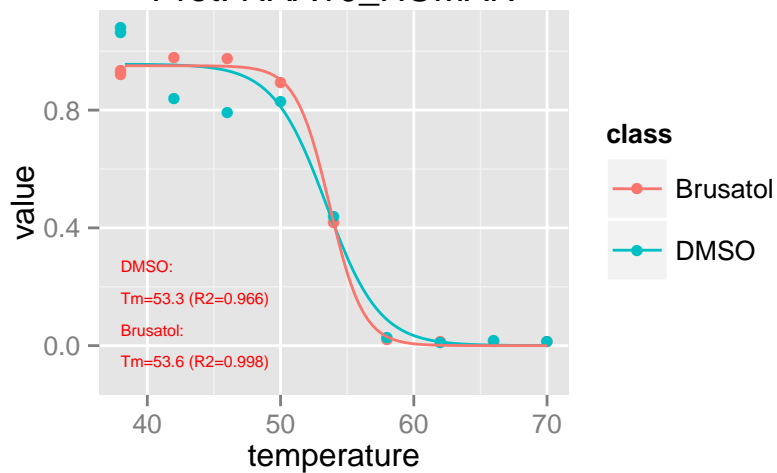

Prot: NAA15\_HUMAN

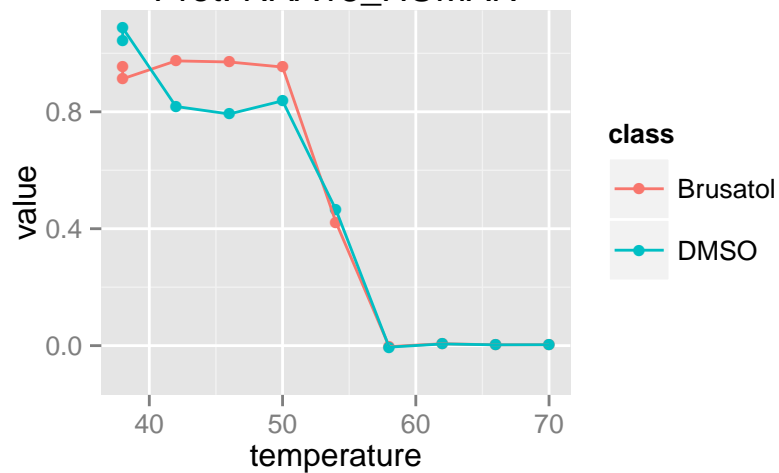

Prot: NAA20\_HUMAN

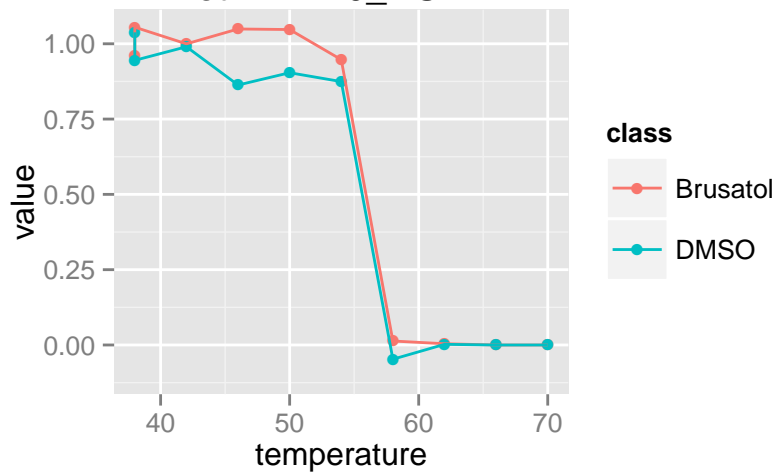

Prot: NAA25\_HUMAN

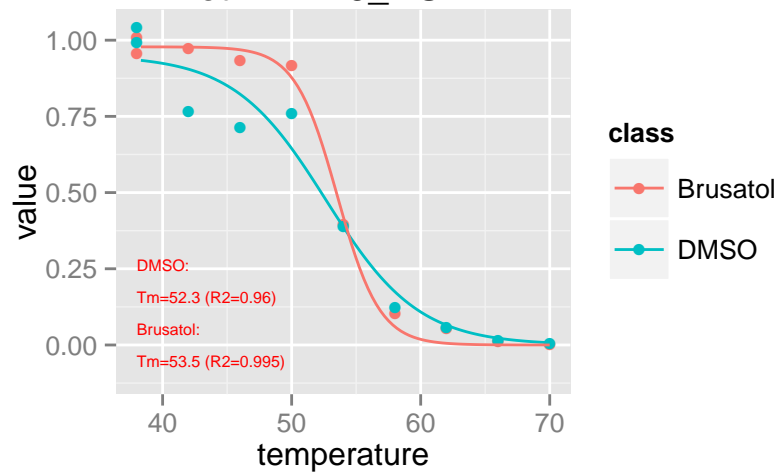

Prot: NAA30\_HUMAN

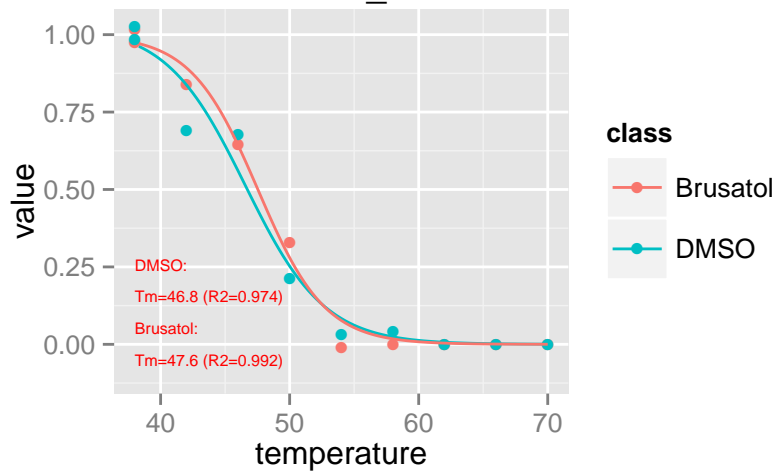

Prot: NAA35\_HUMAN

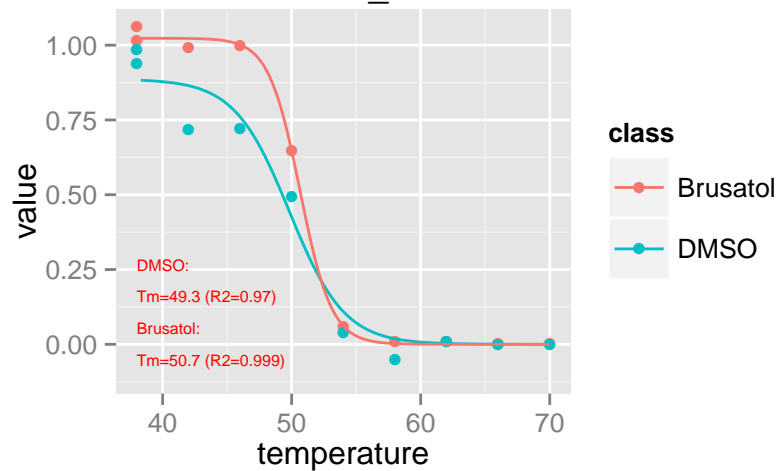

Prot: NAA38\_HUMAN

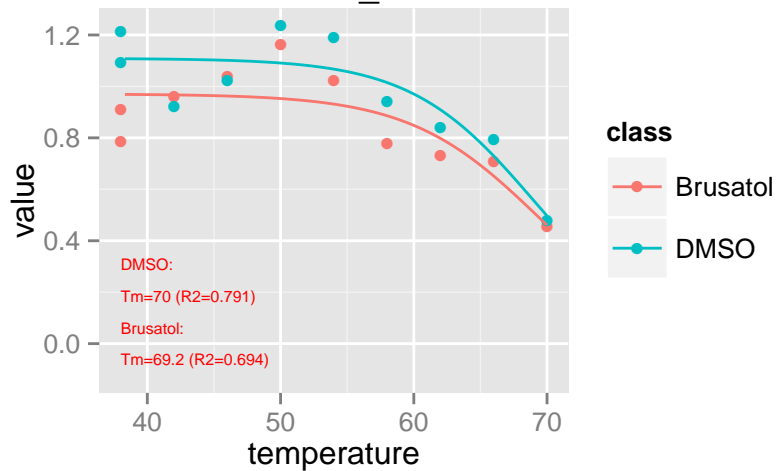

Prot: NAA50\_HUMAN

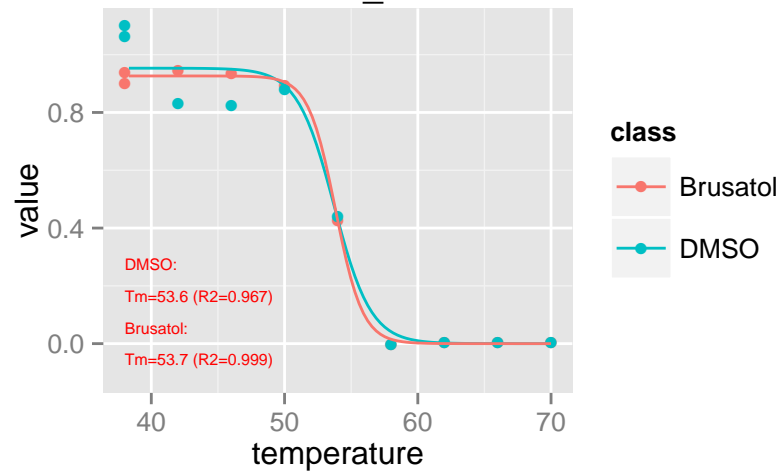

Prot: NACA\_HUMAN

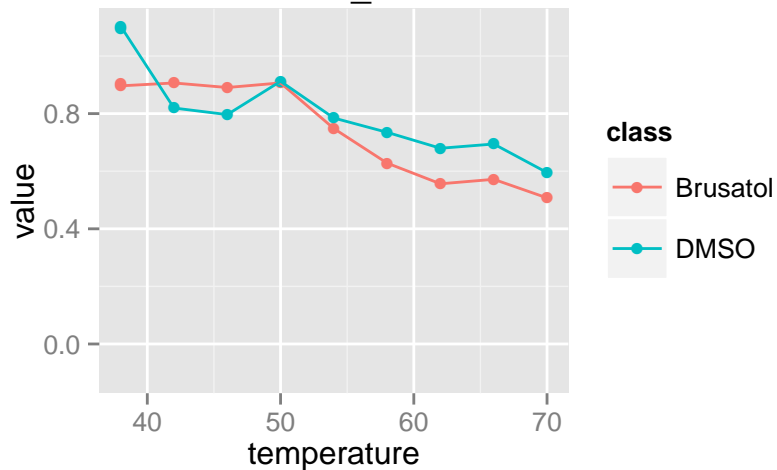

Prot: NACC1\_HUMAN

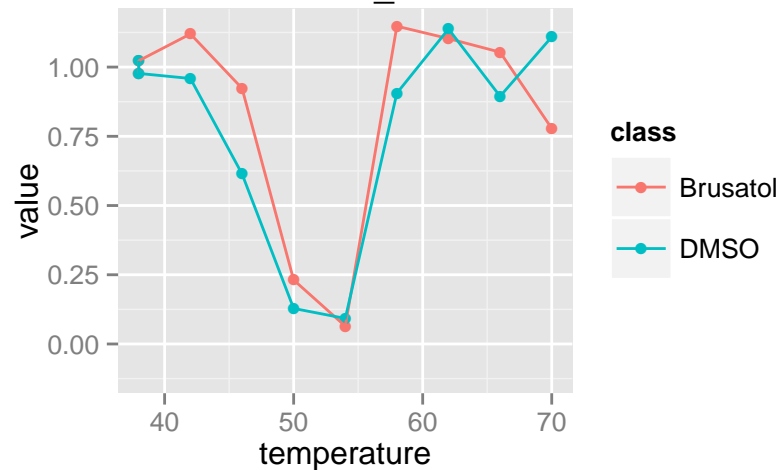

Prot: NADAP\_HUMAN

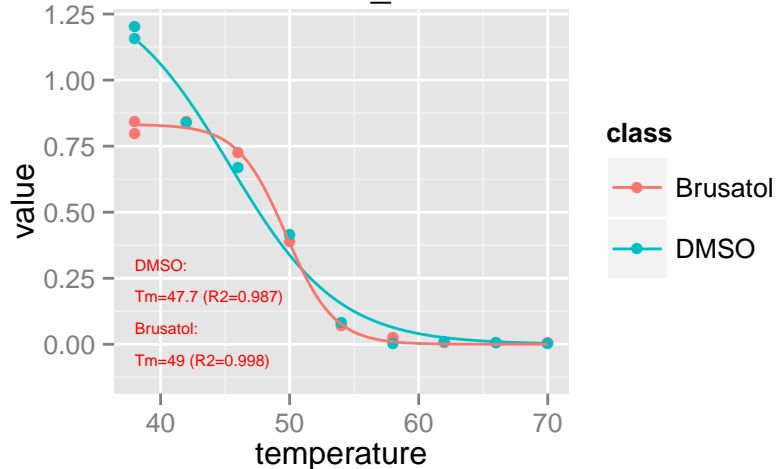

Prot: NADE\_HUMAN

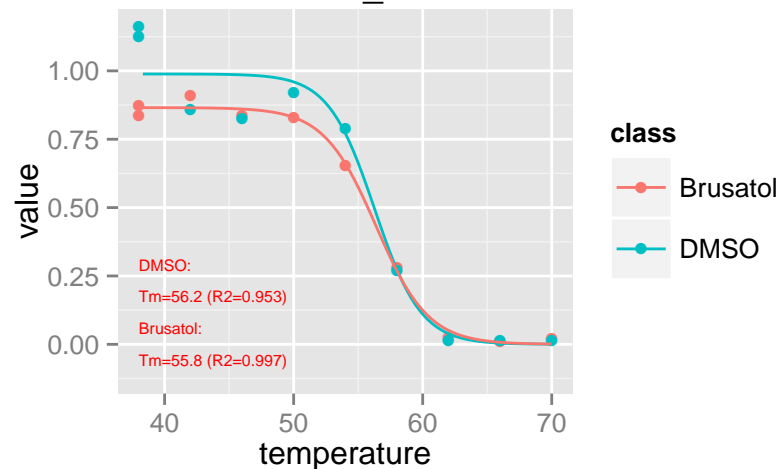

Prot: NAGK\_HUMAN

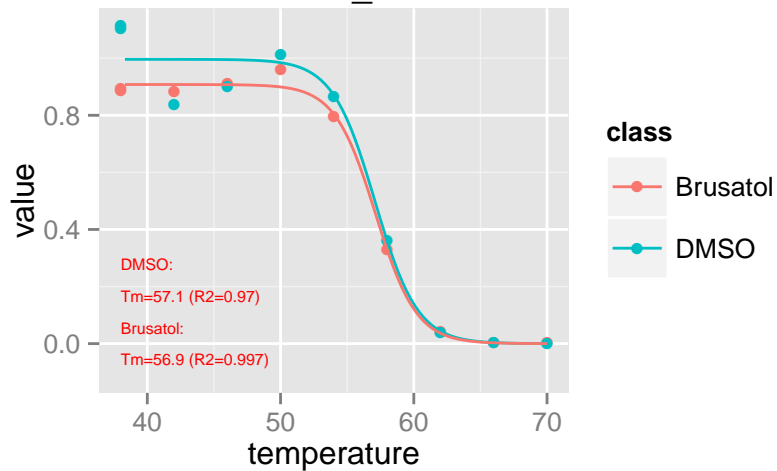

Prot: NAKD1\_HUMAN

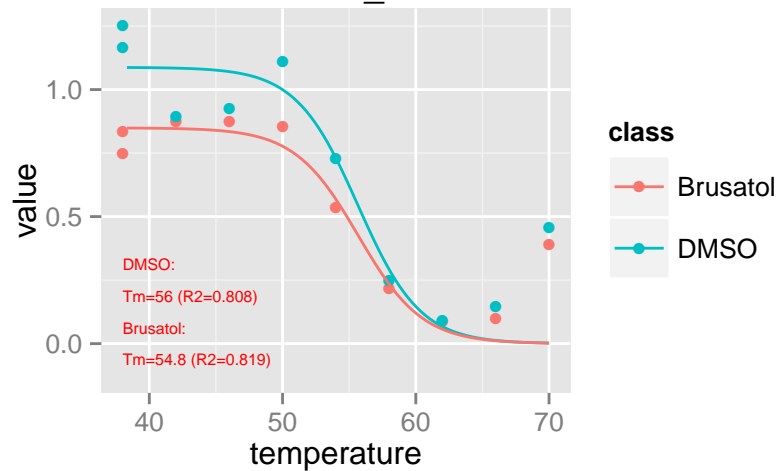

Prot: NALP2\_HUMAN

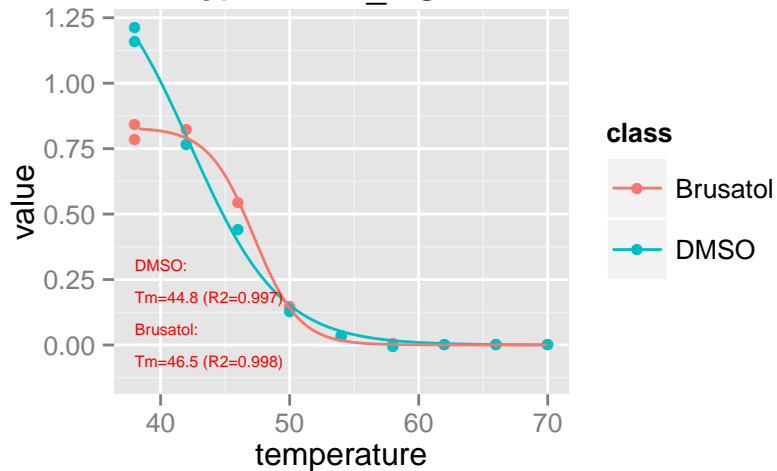

Prot: NAMPT\_HUMAN

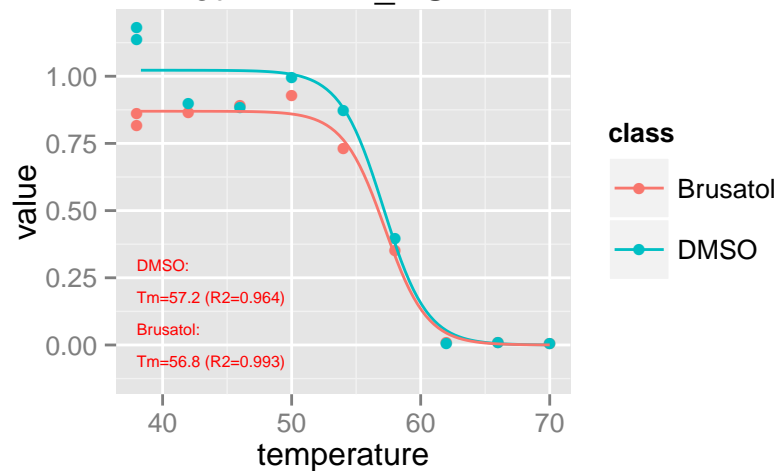

Prot: NANP\_HUMAN

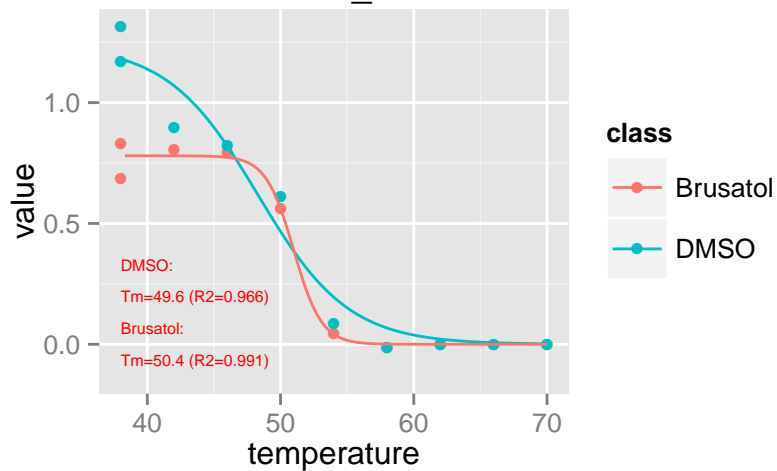

Prot: NASP\_HUMAN

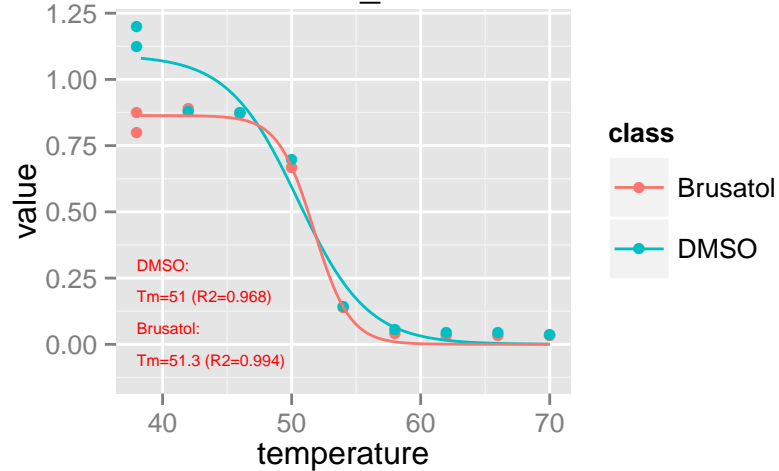

Prot: NBEA\_HUMAN

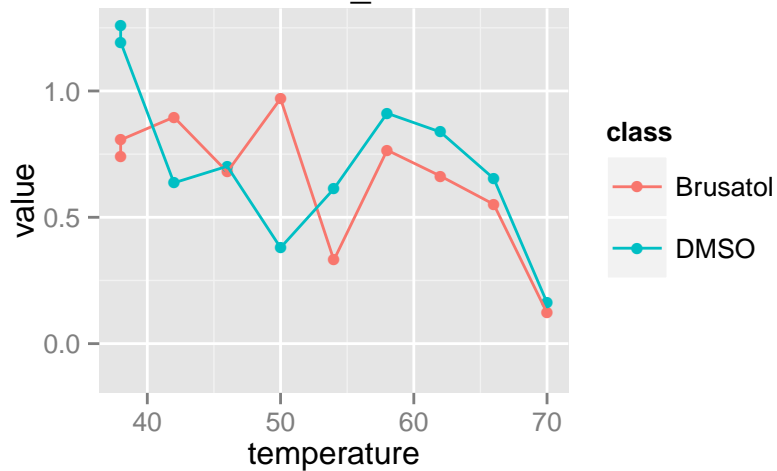

Prot: NBEL2\_HUMAN

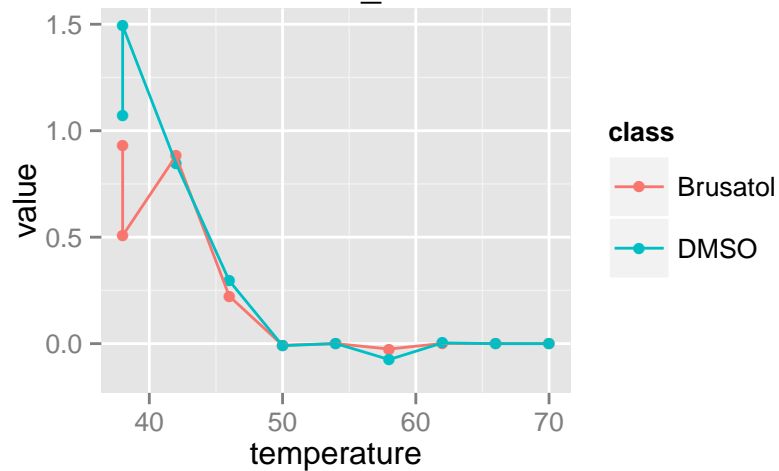

Prot: NBN\_HUMAN

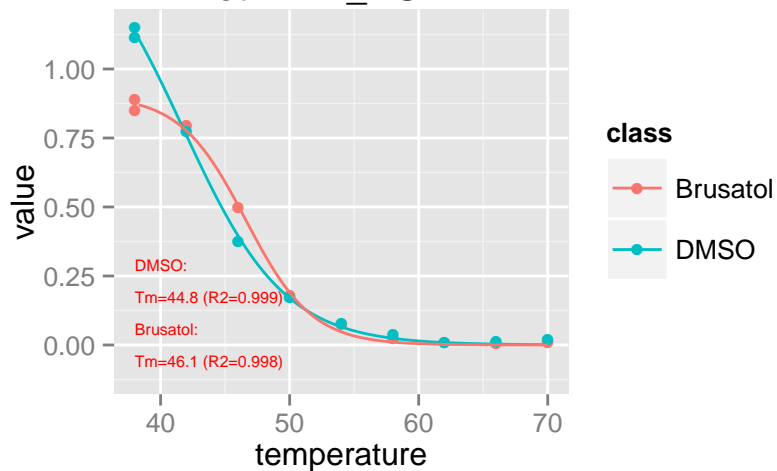

Prot: NC2A\_HUMAN

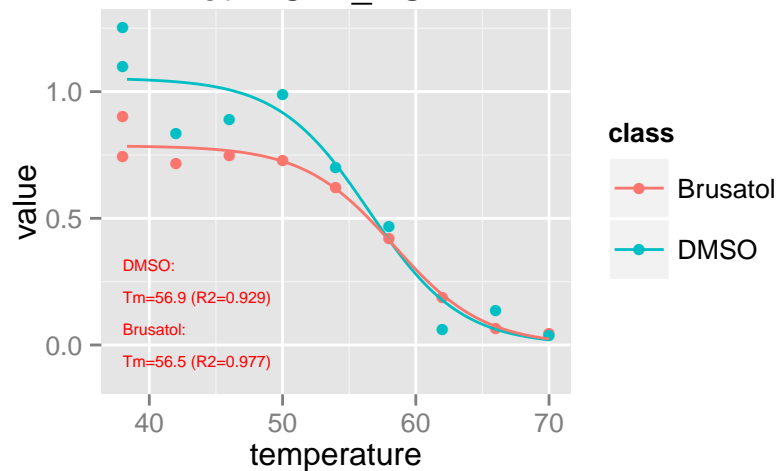

Prot: NC2B\_HUMAN

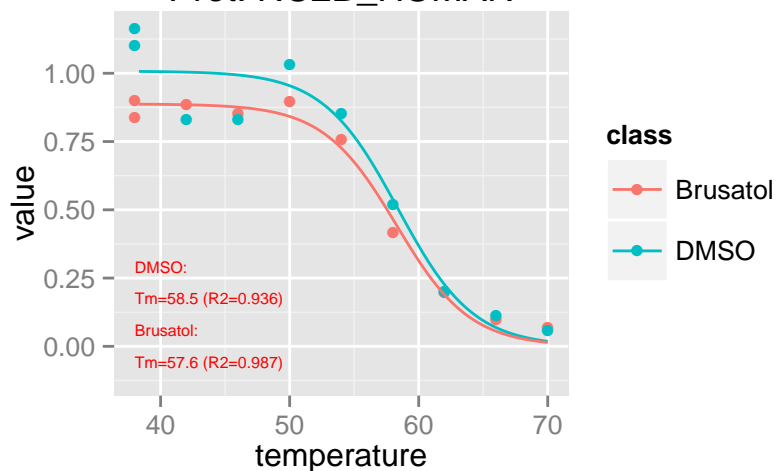

Prot: NCBP1\_HUMAN

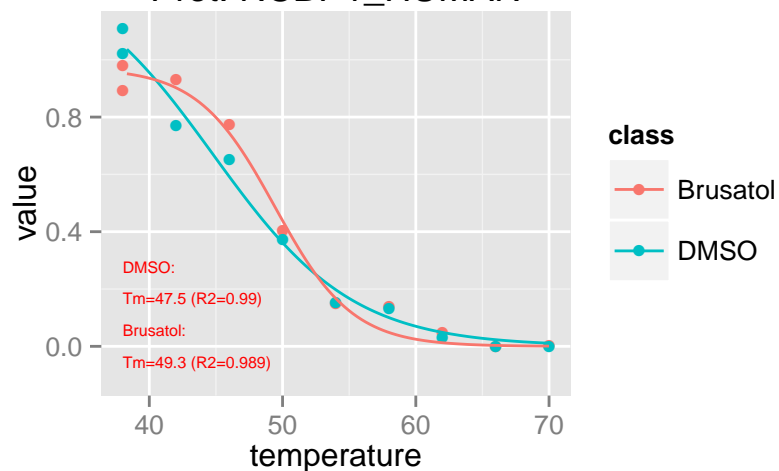

Prot: NCBP2\_HUMAN

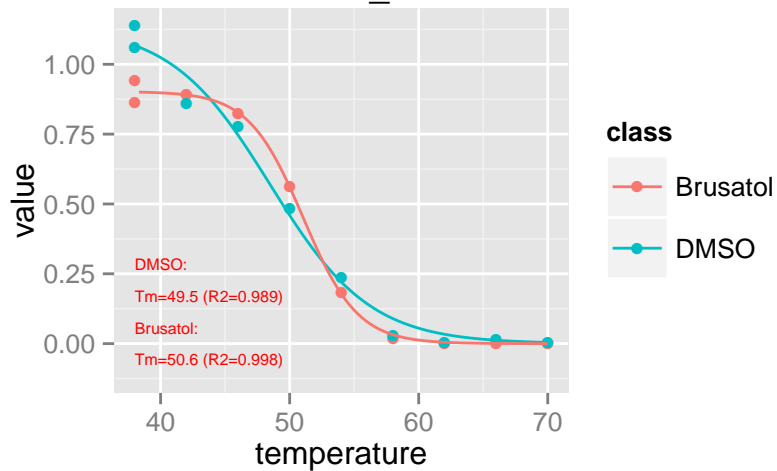

Prot: NCDN\_HUMAN

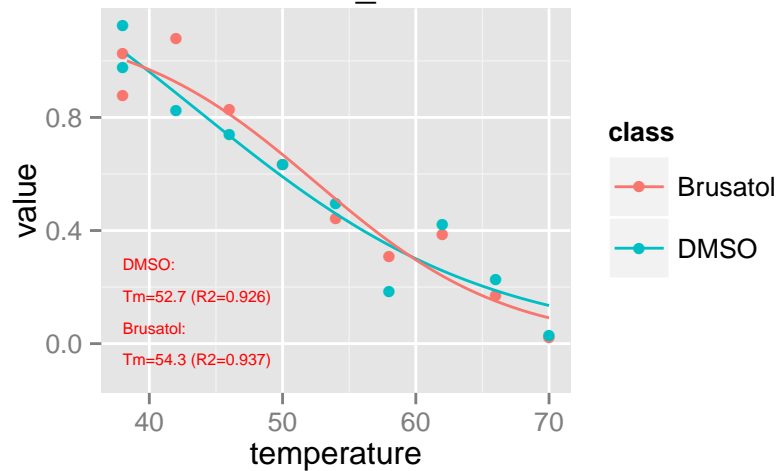

Prot: NCK1\_HUMAN

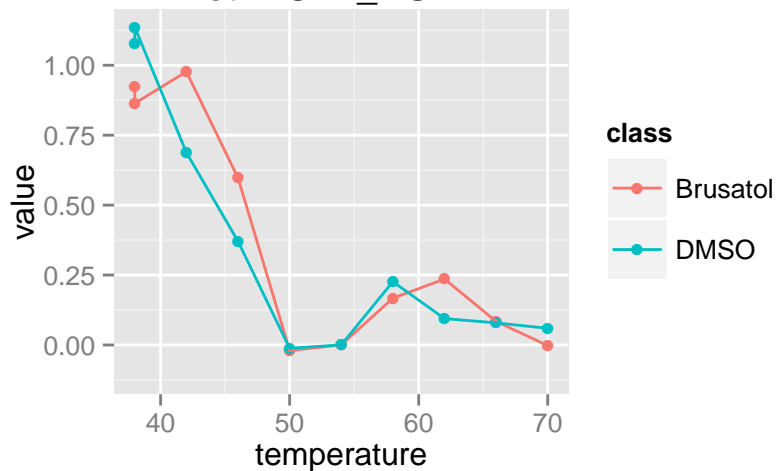

Prot: NCKP1\_HUMAN

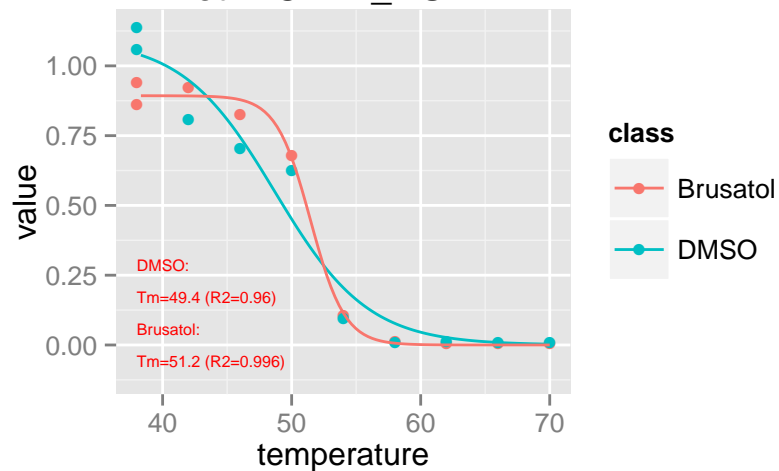

Prot: NCOA3\_HUMAN

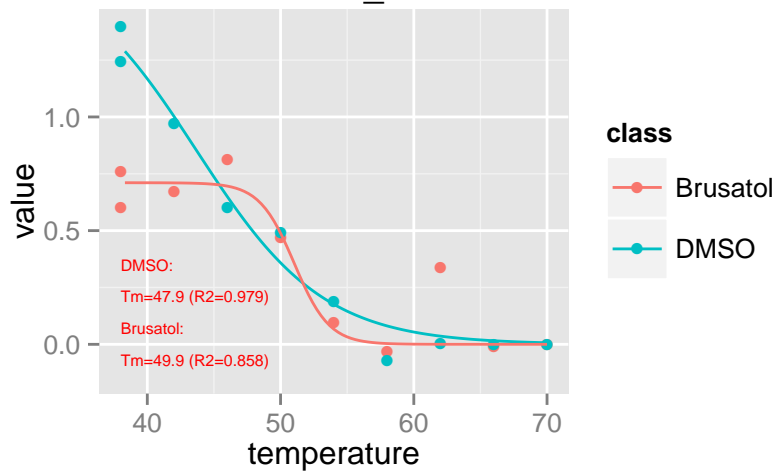

Prot: NCOA7\_HUMAN

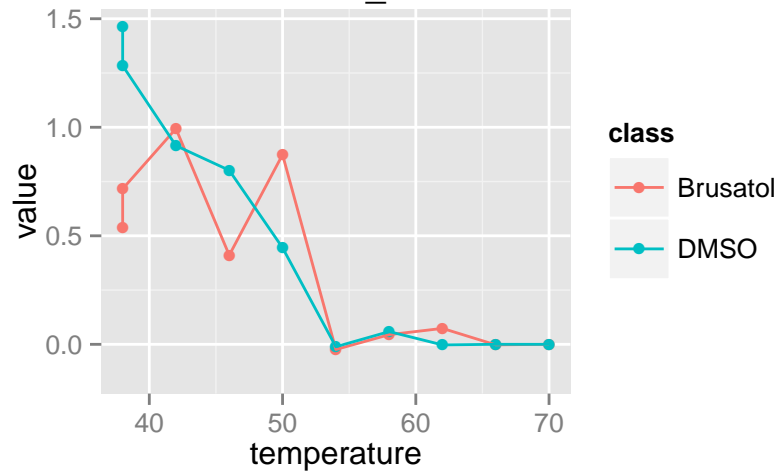



Prot: NCOAT\_HUMAN

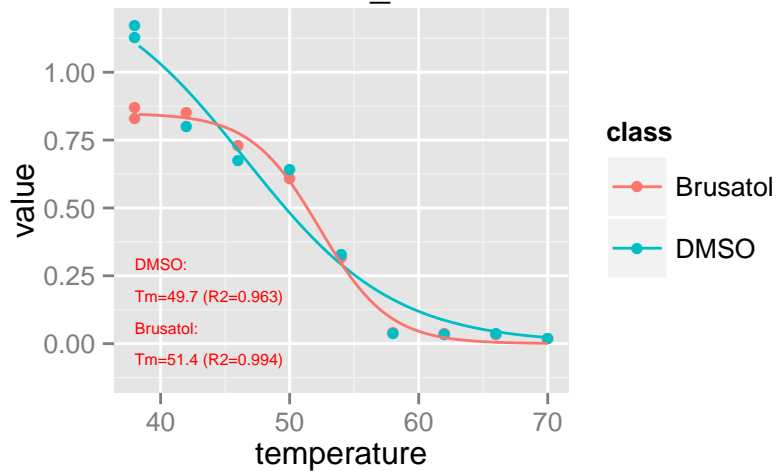

Prot: NCOR1\_HUMAN

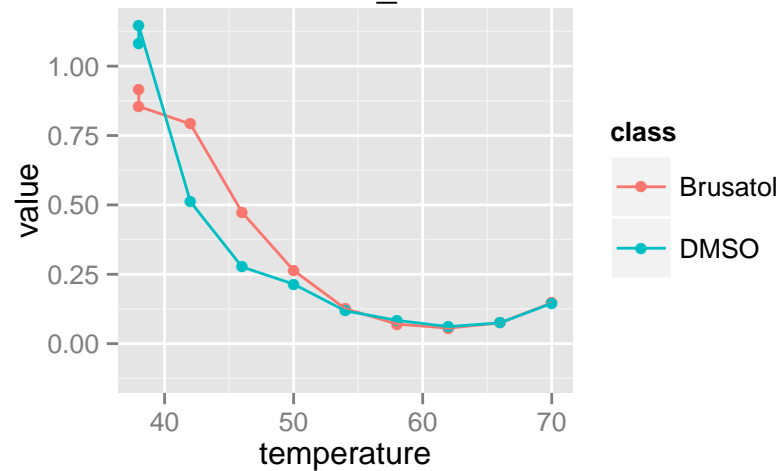

Prot: NCOR2\_HUMAN

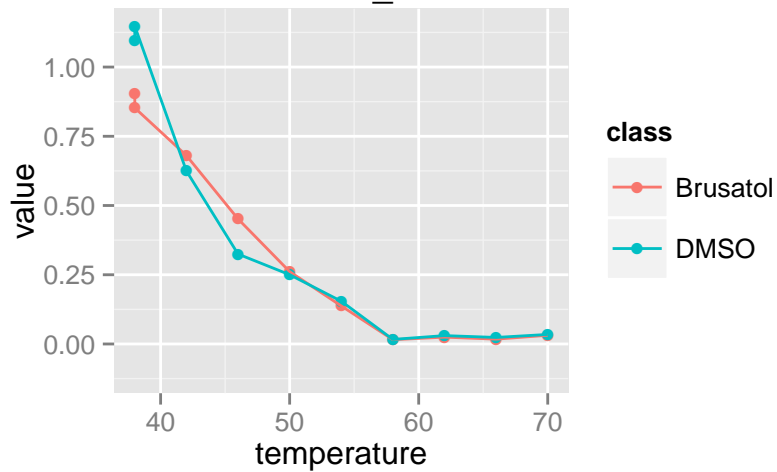

Prot: NDC80\_HUMAN

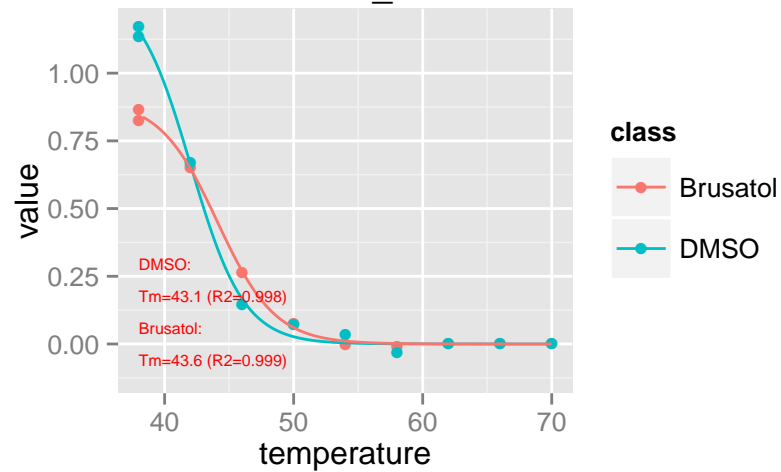

Prot: NDE1\_HUMAN

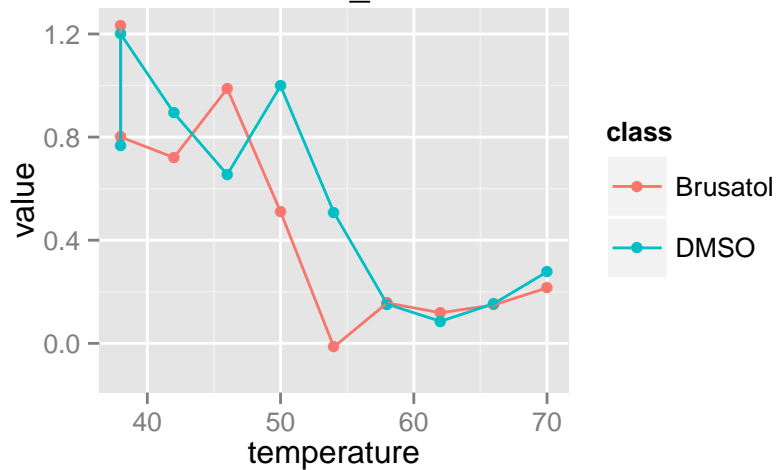

Prot: NDK3\_HUMAN

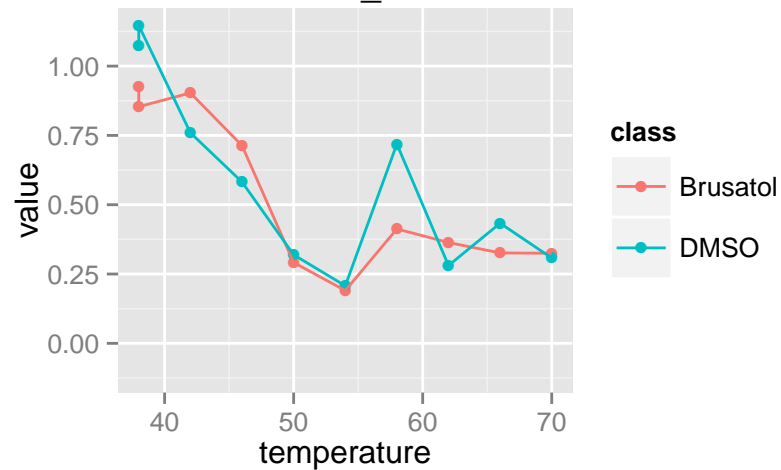

Prot: NDK8\_HUMAN

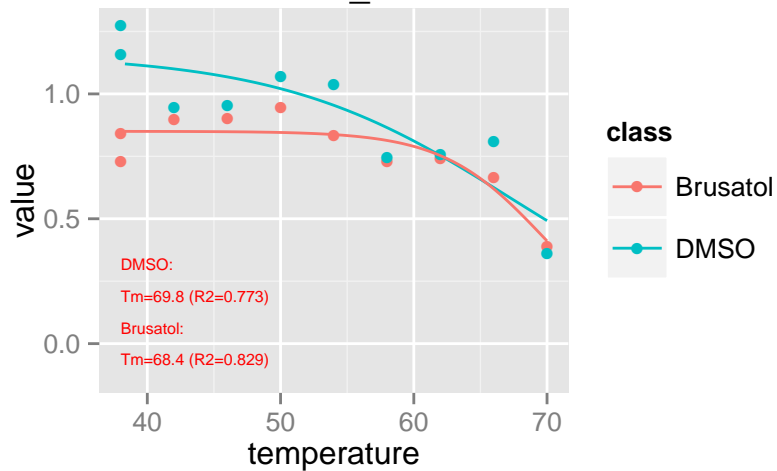

Prot: NDKA\_HUMAN

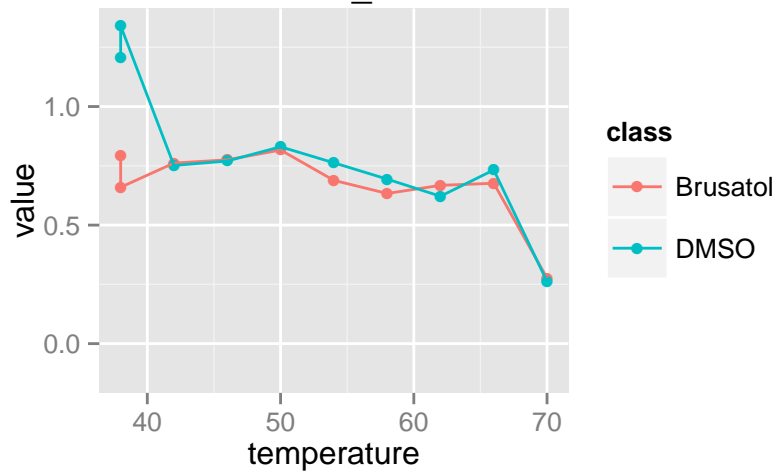

Prot: NDKB\_HUMAN

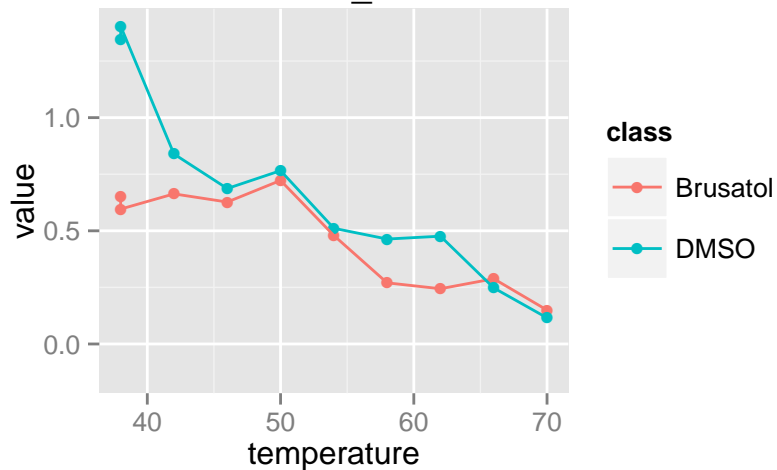

Prot: NDKM\_HUMAN

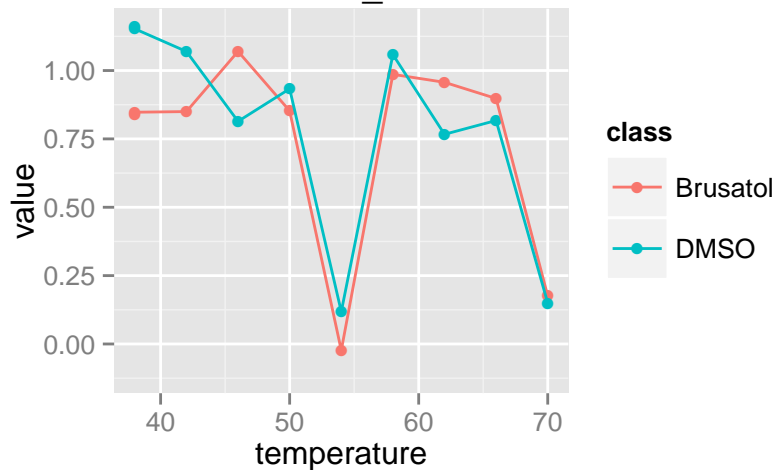

Prot: NDOR1\_HUMAN

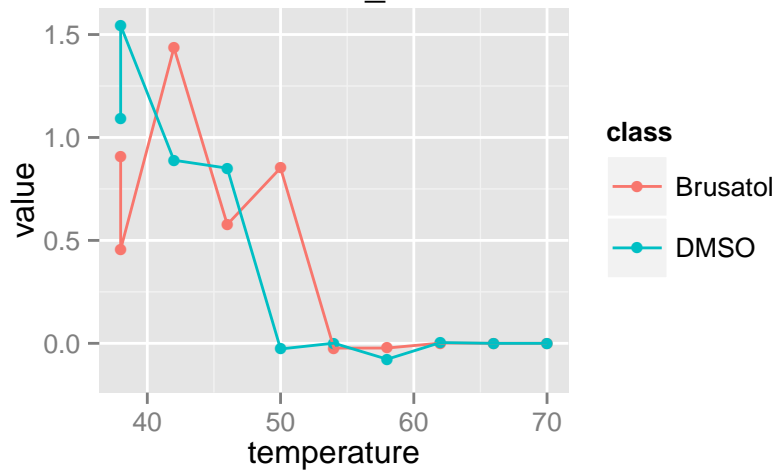

Prot: NDRG1\_HUMAN

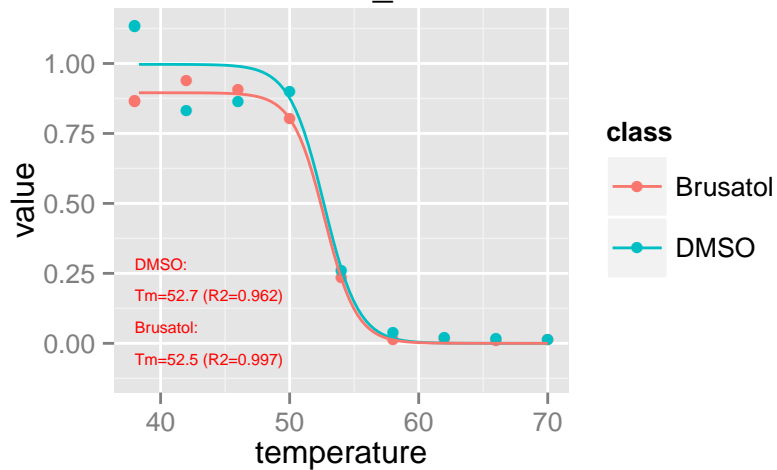

Prot: NDRG3\_HUMAN

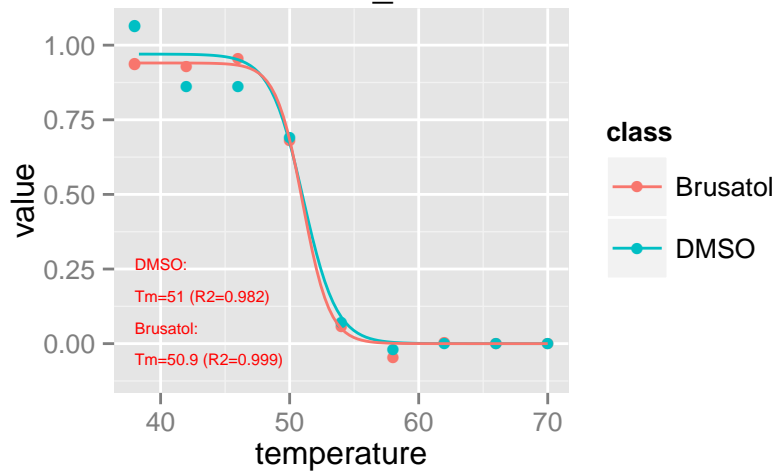

Prot: NDUA2\_HUMAN

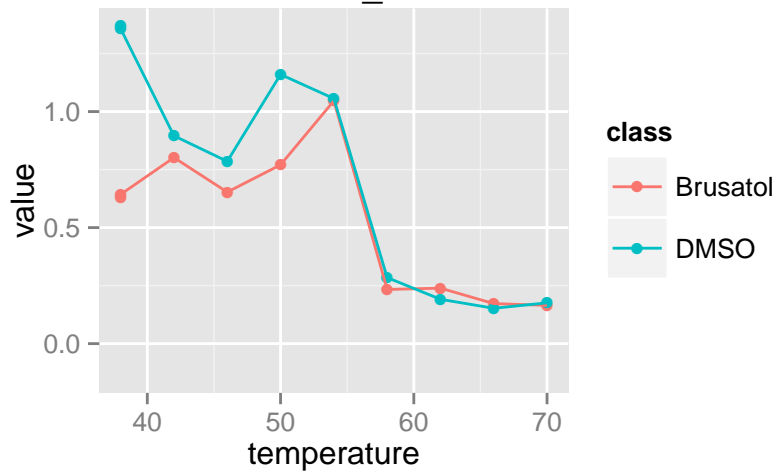

Prot: NDUA5\_HUMAN

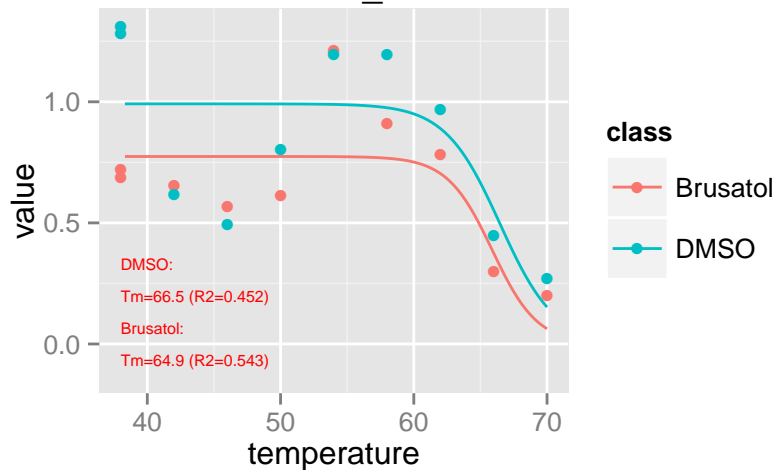

Prot: NDUS1\_HUMAN

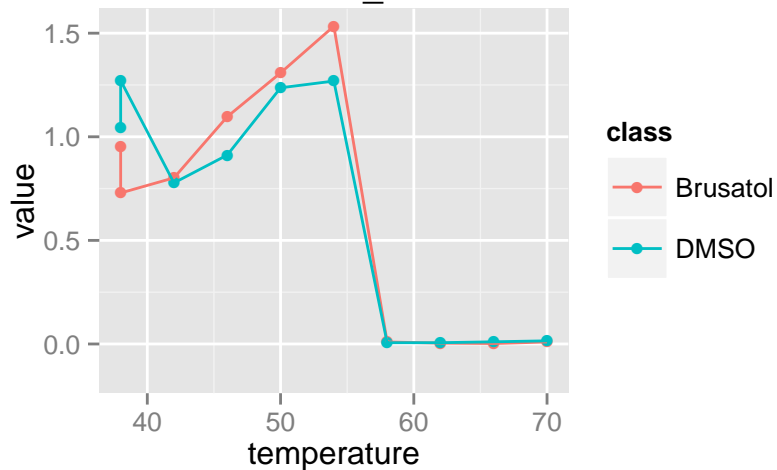

Prot: NDUV1\_HUMAN

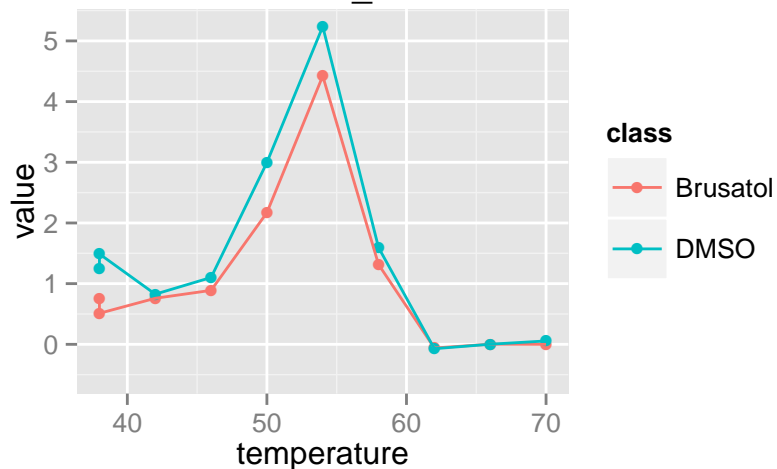

Prot: NDUV2\_HUMAN

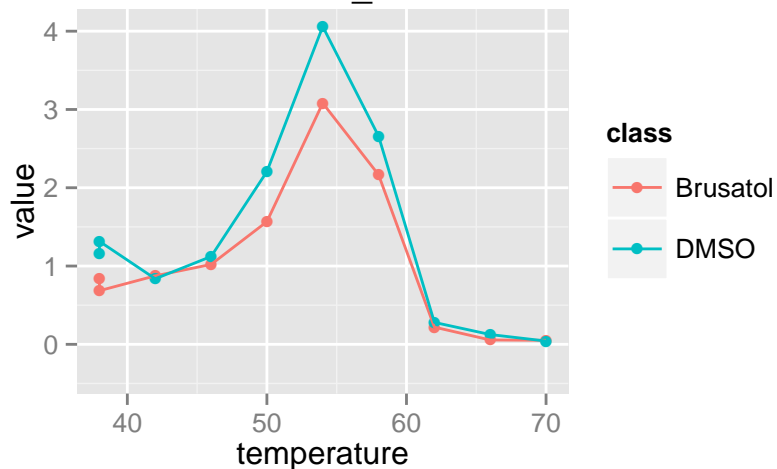

Prot: NEBL\_HUMAN

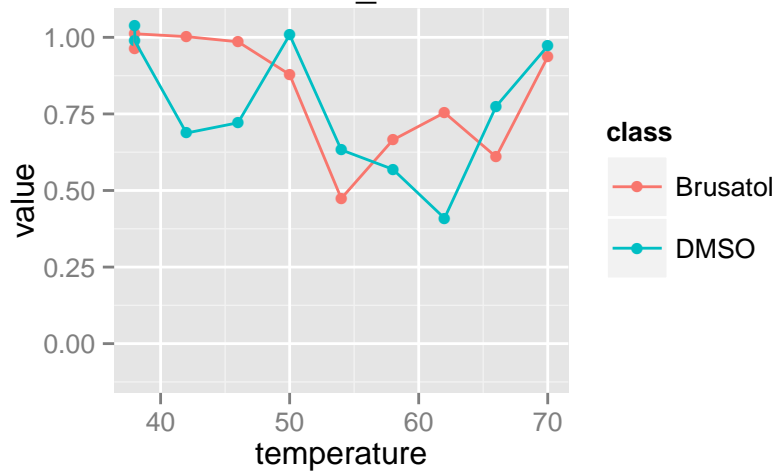

Prot: NECP2\_HUMAN

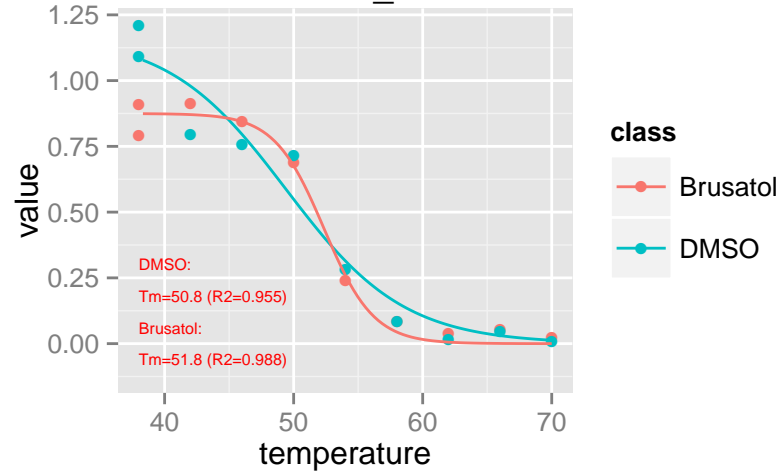

Prot: NEDD1\_HUMAN

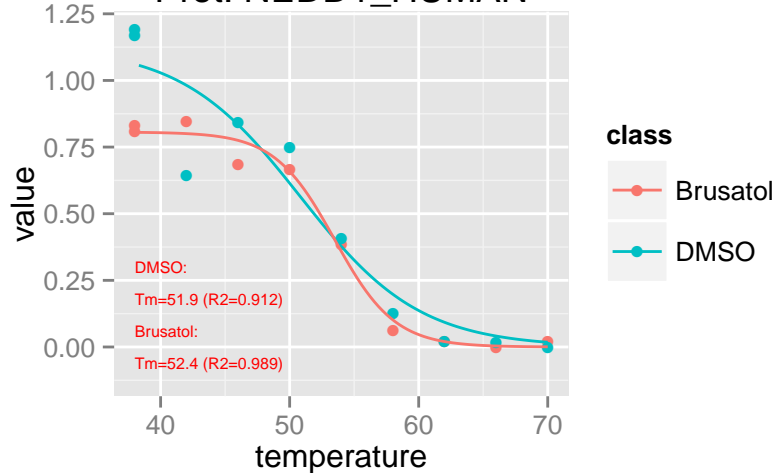

Prot: NEDD4\_HUMAN

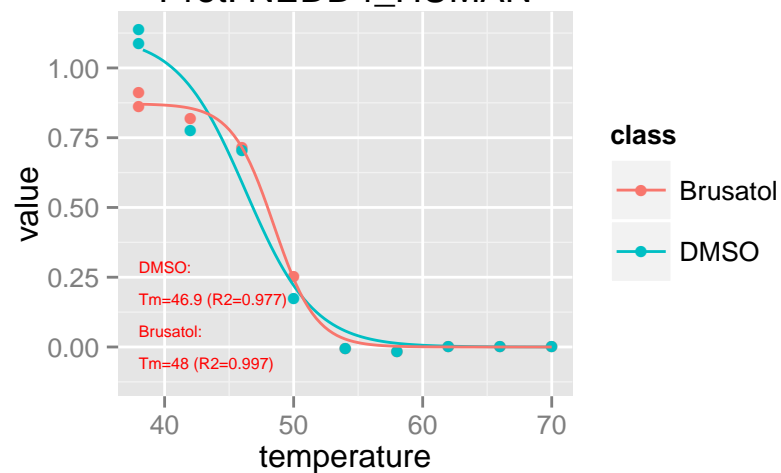

Prot: NEDD8\_HUMAN

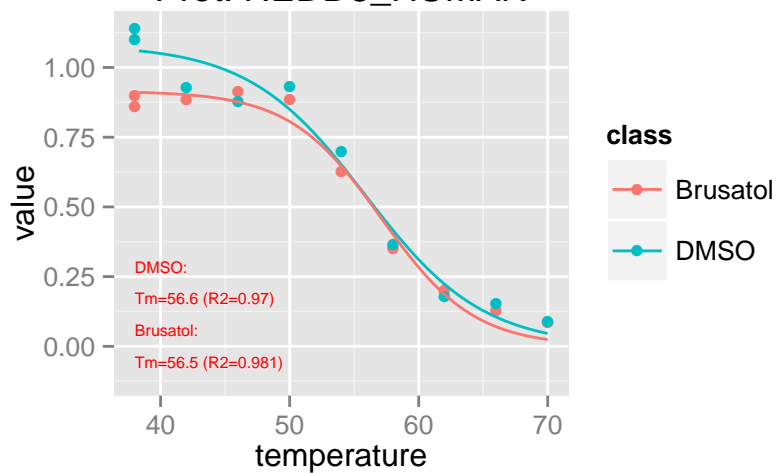

Prot: NEK9\_HUMAN

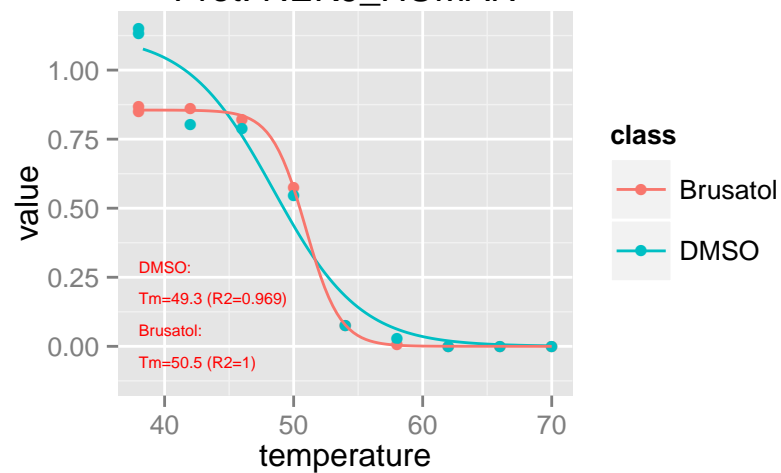

Prot: NELFA\_HUMAN

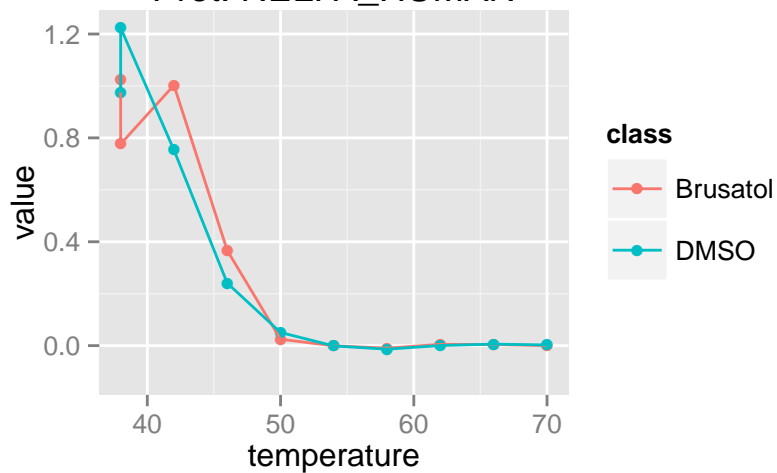

Prot: NELFB\_HUMAN

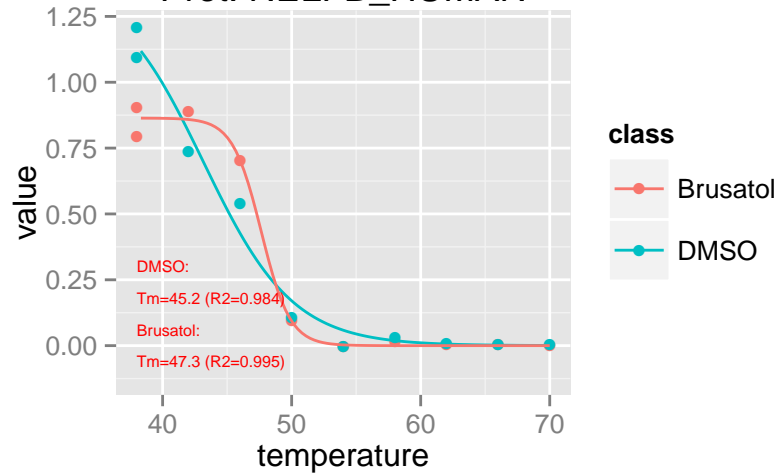

Prot: NELFD\_HUMAN

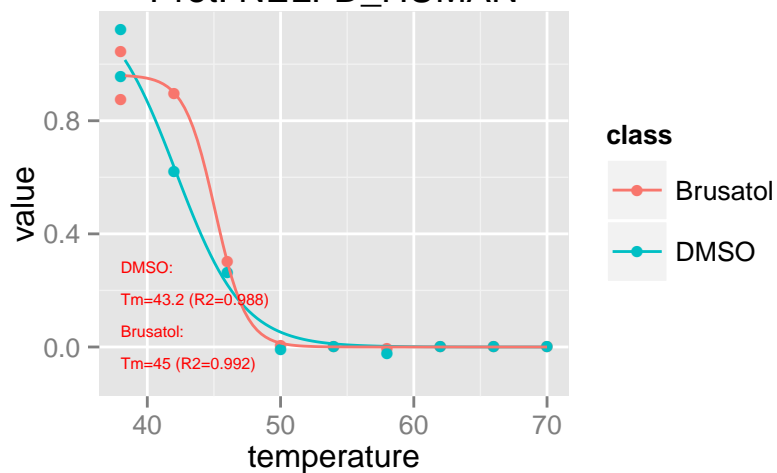

Prot: NELFE\_HUMAN

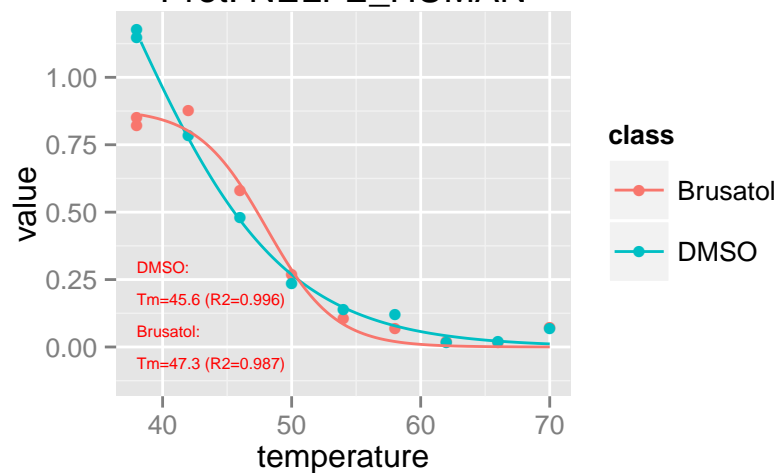

Prot: NEMF\_HUMAN

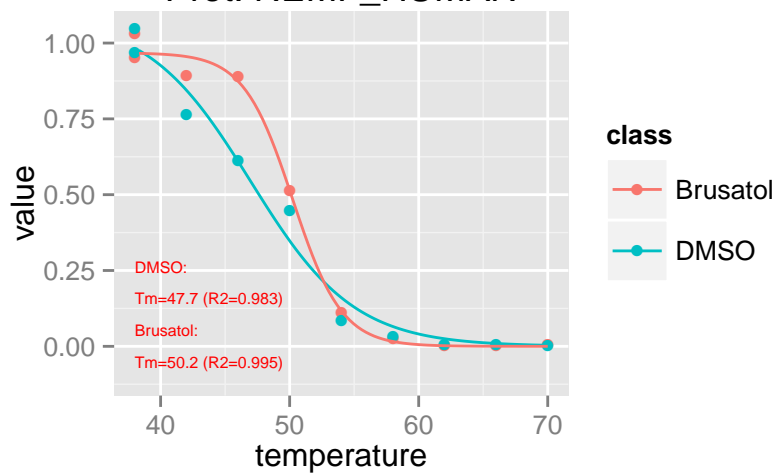

Prot: NEMO\_HUMAN

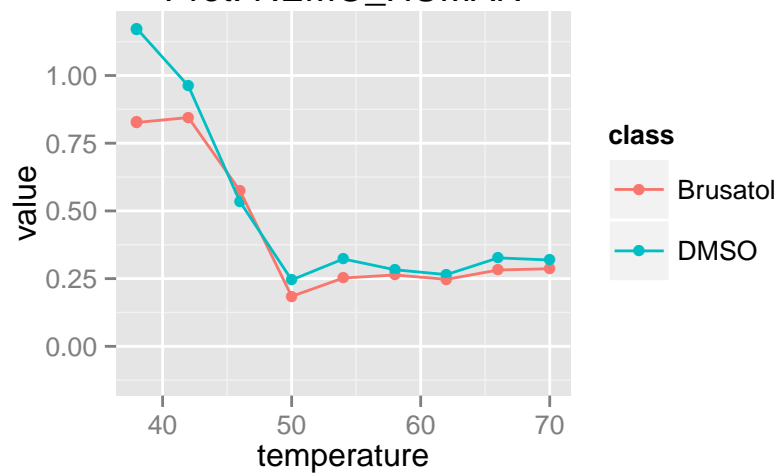

Prot: NENF\_HUMAN

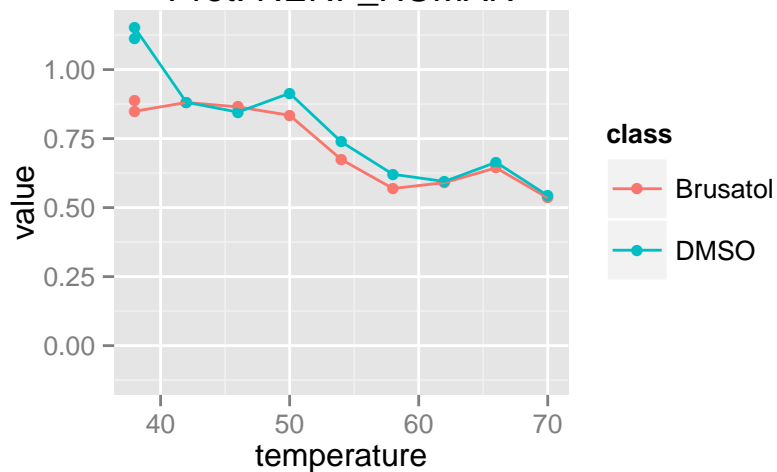

Prot: NEP1\_HUMAN

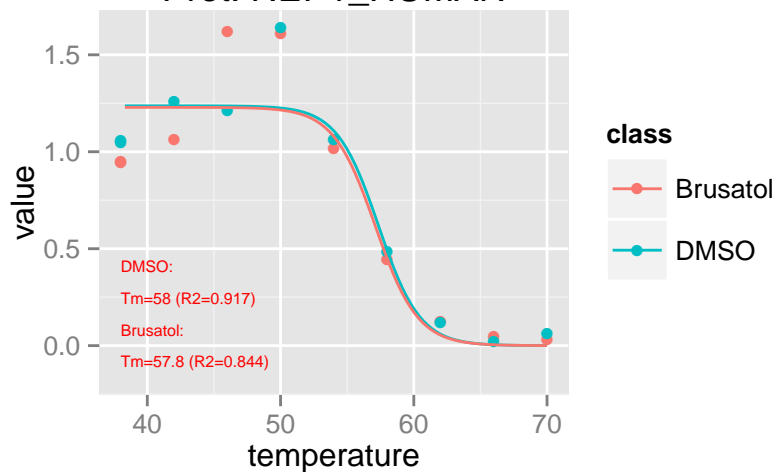

Prot: NEUA\_HUMAN

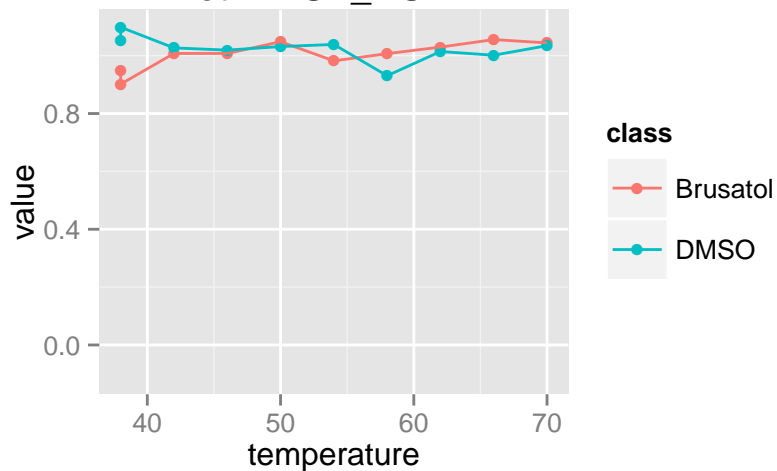

Prot: NEUL\_HUMAN

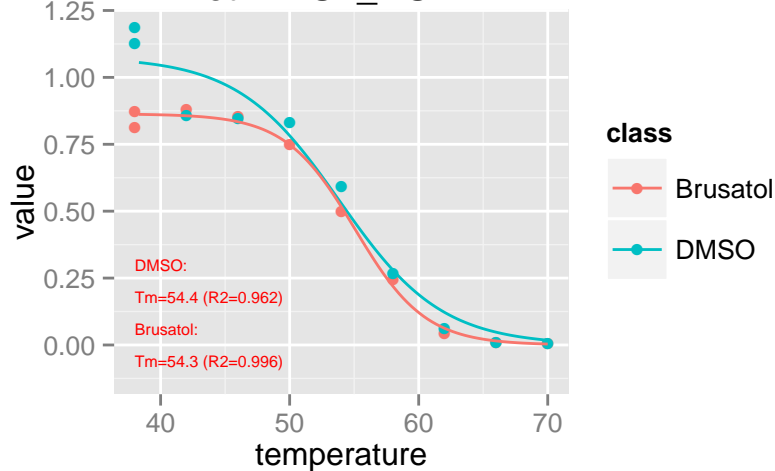

Prot: NFKB1\_HUMAN

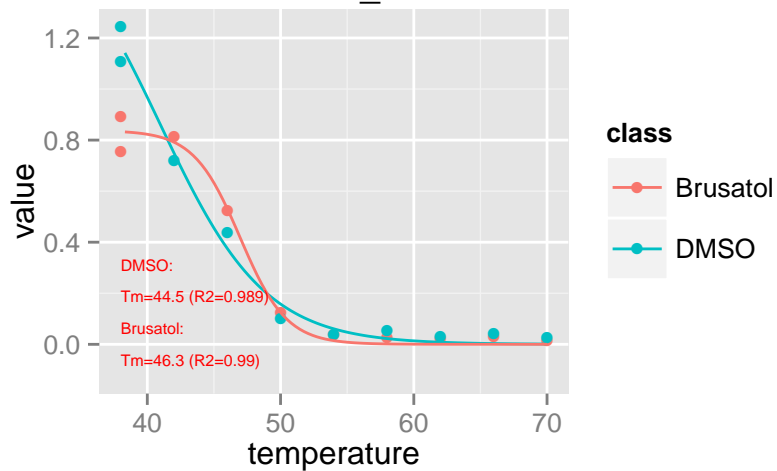

Prot: NFKB2\_HUMAN

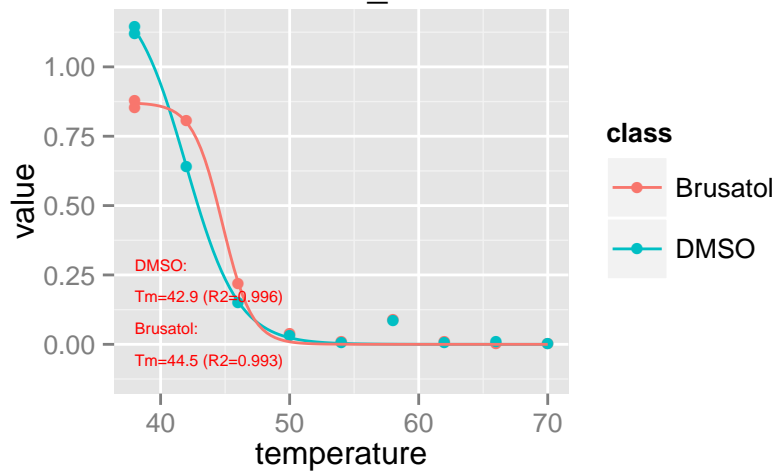

Prot: NFS1\_HUMAN

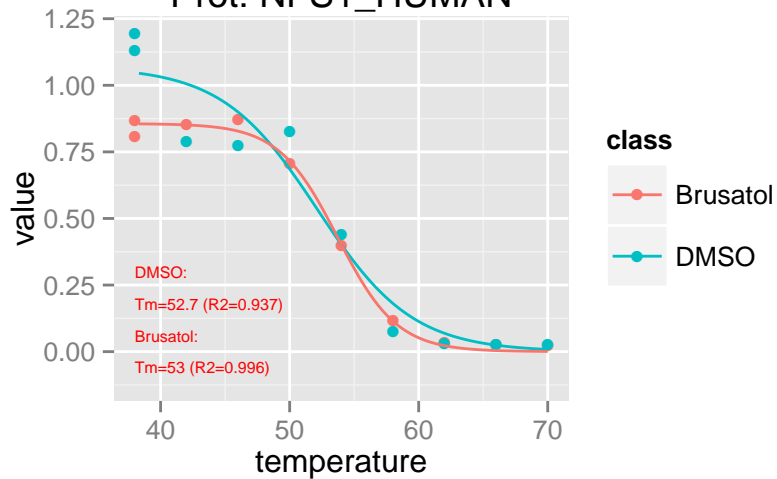

Prot: NFU1\_HUMAN

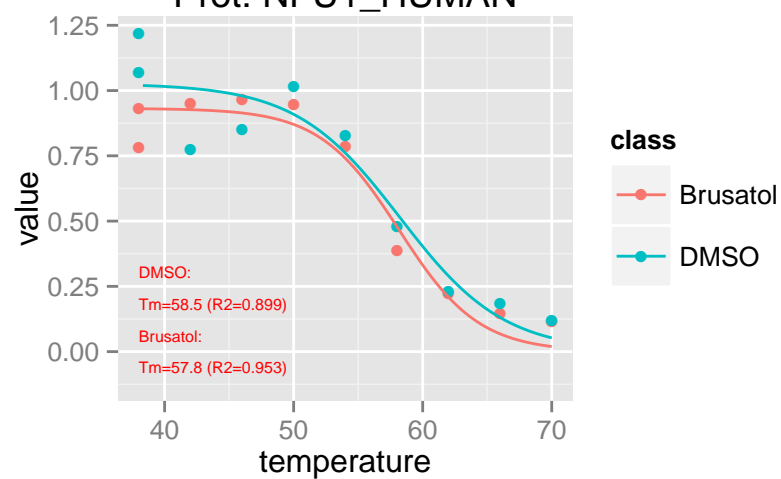

Prot: NFYA\_HUMAN

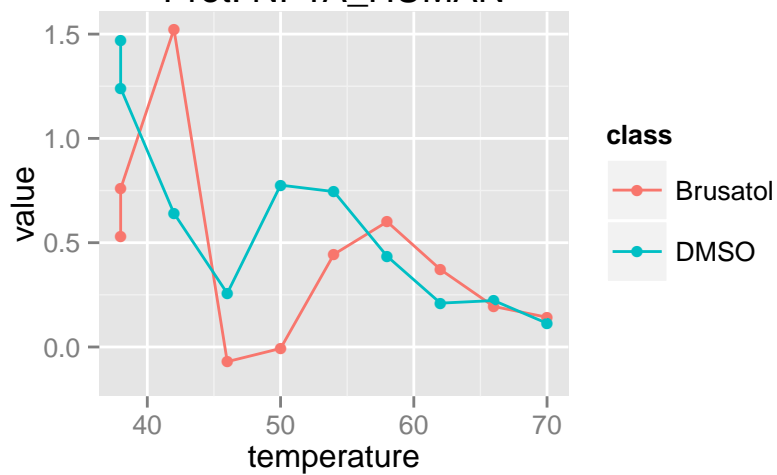

Prot: NFYB\_HUMAN

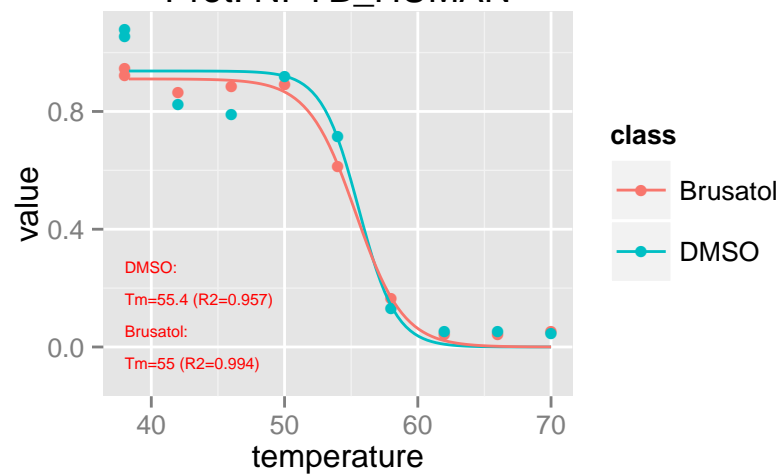

Prot: NGLY1\_HUMAN

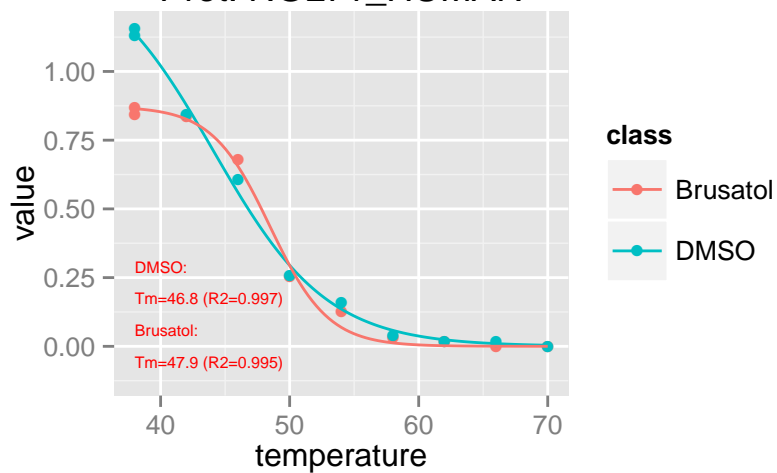

Prot: NH2L1\_HUMAN

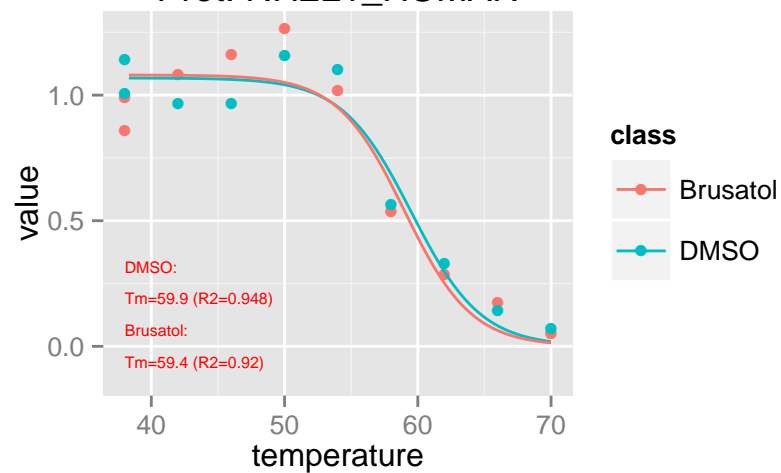

Prot: NHEJ1\_HUMAN

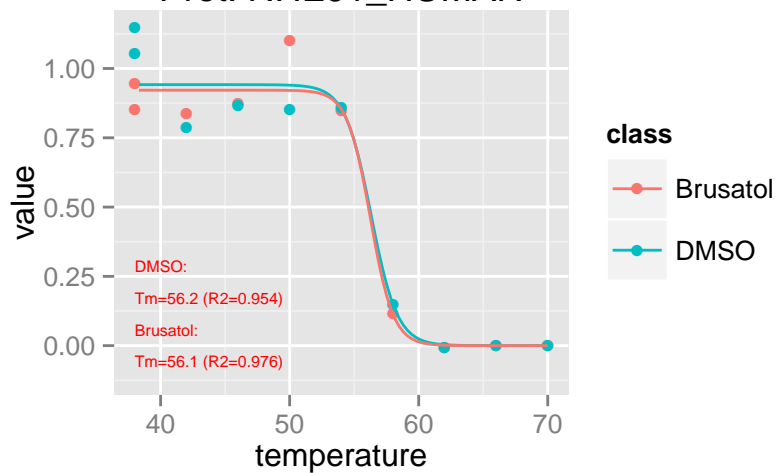

Prot: NHLC2\_HUMAN

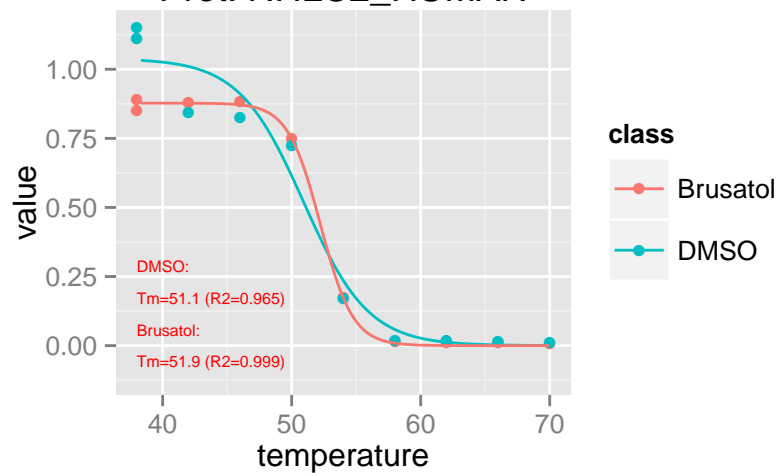

Prot: NHP2\_HUMAN

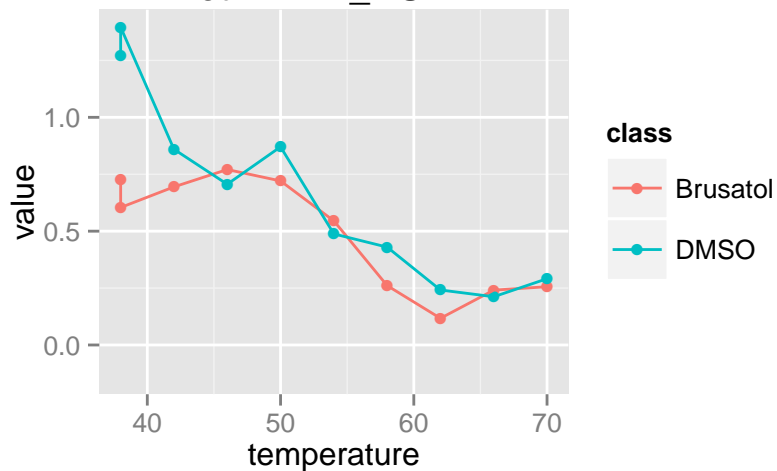

Prot: NHRF1\_HUMAN

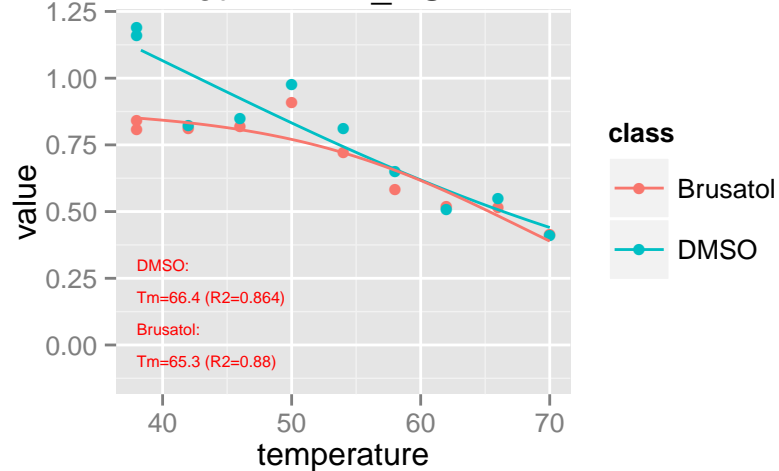

Prot: NHRF2\_HUMAN

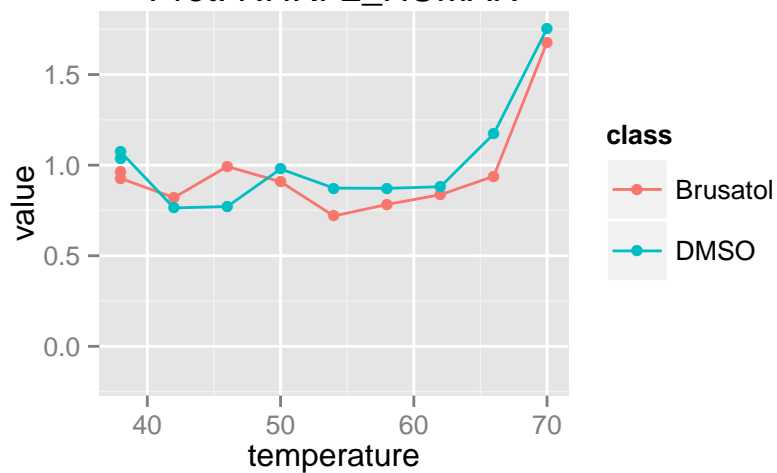

Prot: NIBL1\_HUMAN

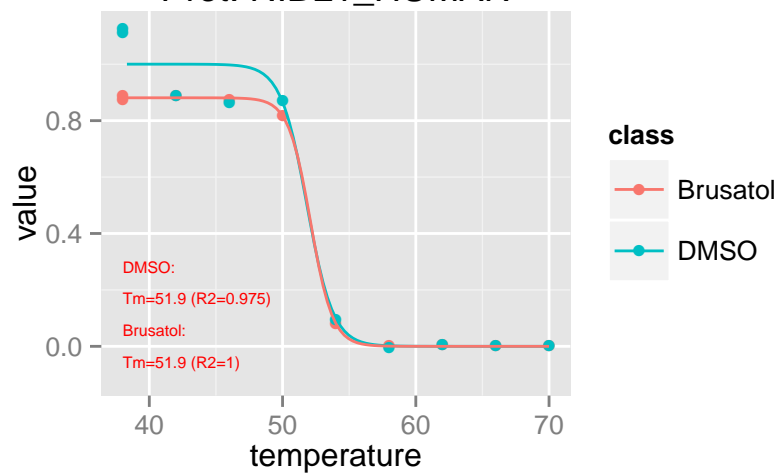



Prot: NIF3L\_HUMAN

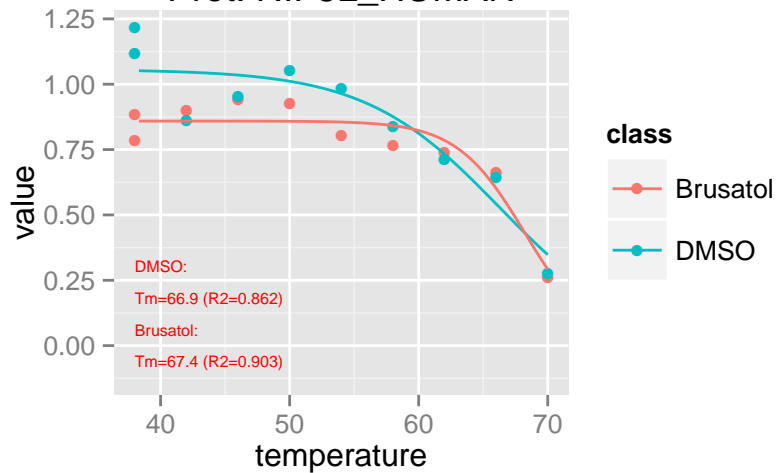

Prot: NIPA\_HUMAN

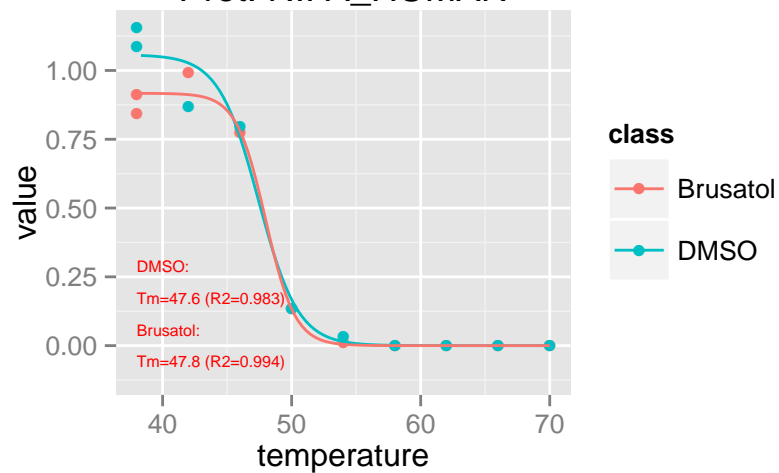

Prot: NIPS1\_HUMAN

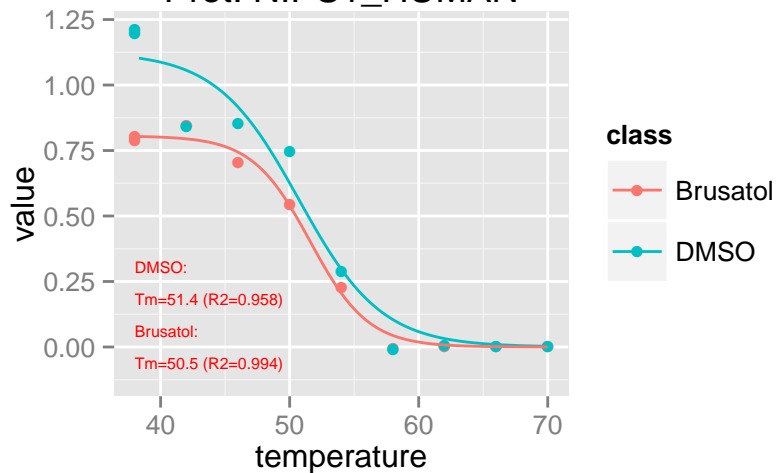

Prot: NIPS2\_HUMAN

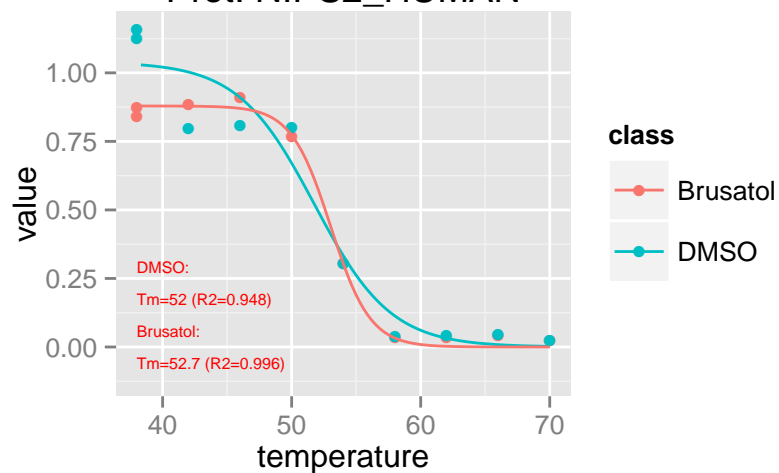

Prot: NIT1\_HUMAN

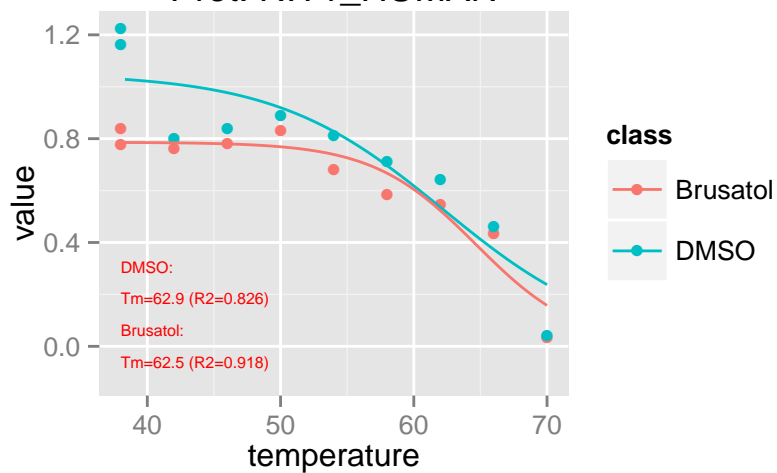

Prot: NIT2\_HUMAN

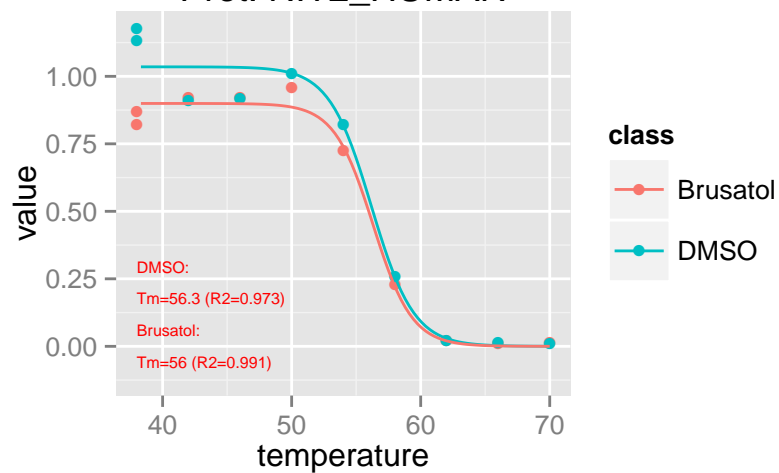

Prot: NJMU\_HUMAN

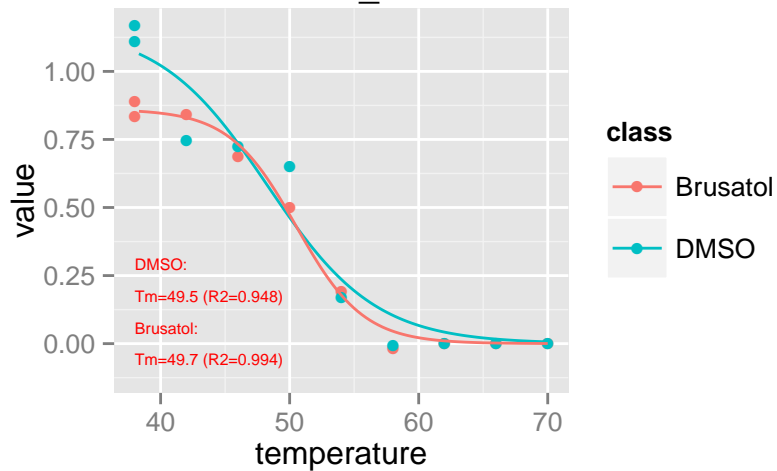

Prot: NLE1\_HUMAN

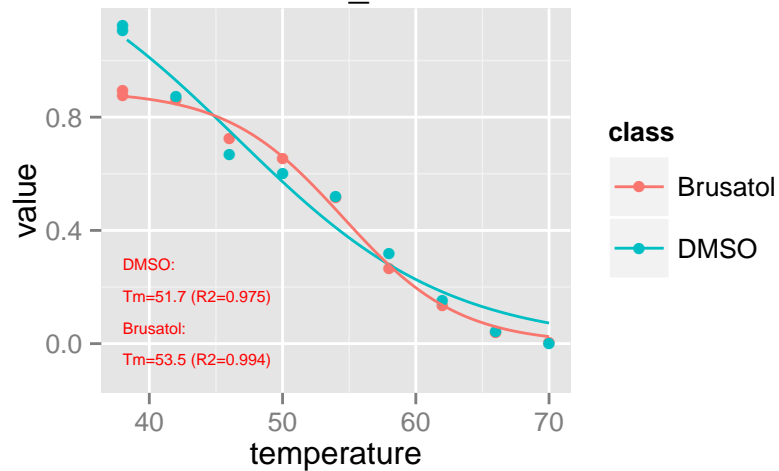

Prot: NLTP\_HUMAN

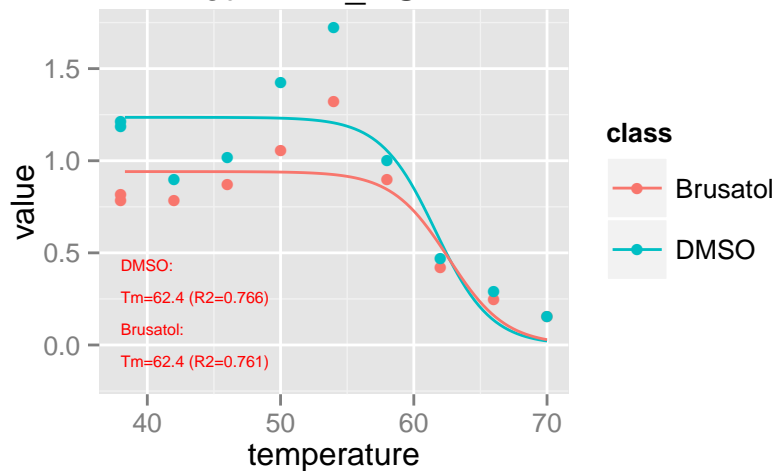

Prot: NMD3\_HUMAN

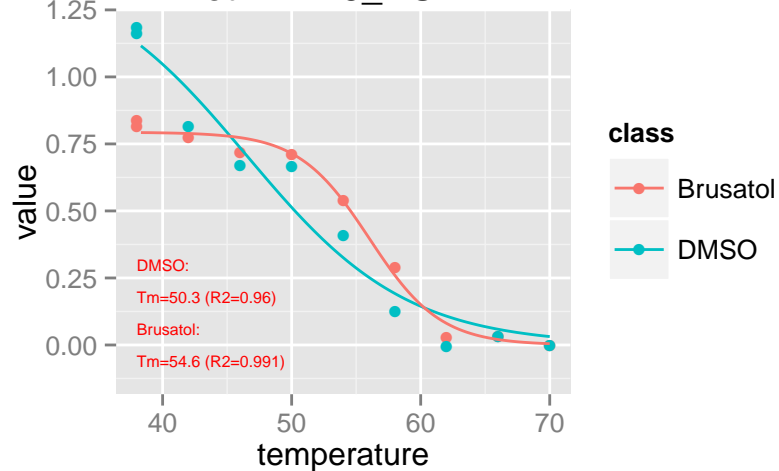

Prot: NMI\_HUMAN

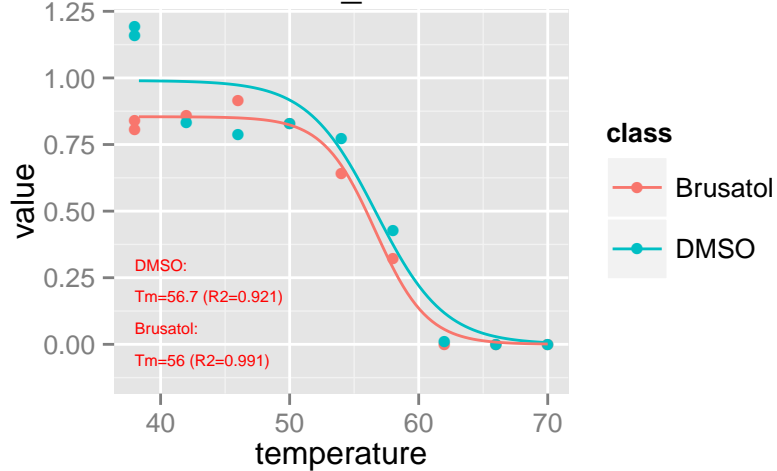

Prot: NMT1\_HUMAN

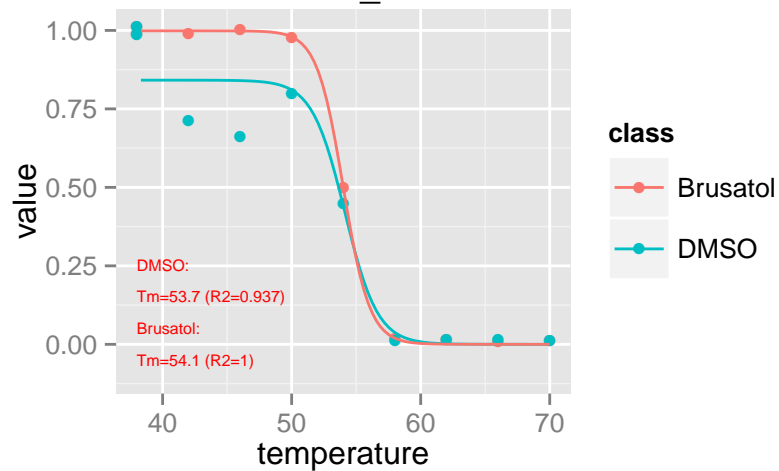

Prot: NNMT\_HUMAN

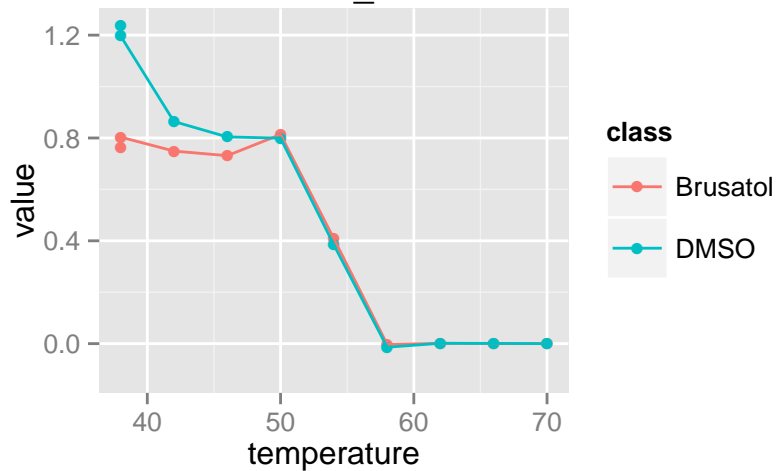

Prot: NOB1\_HUMAN

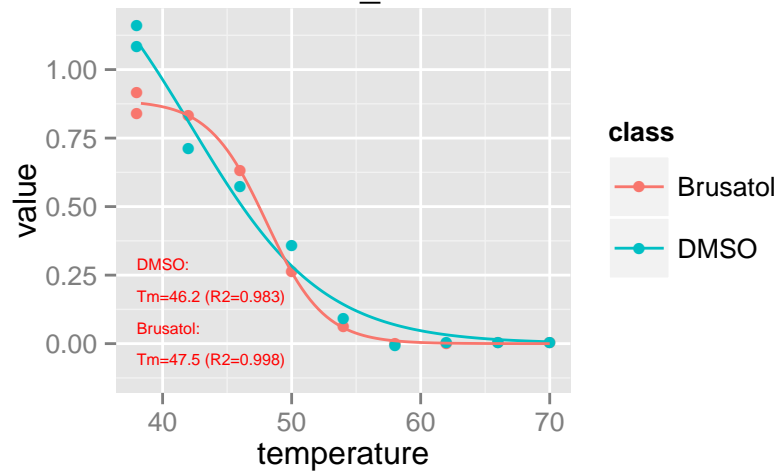

Prot: NOG1\_HUMAN

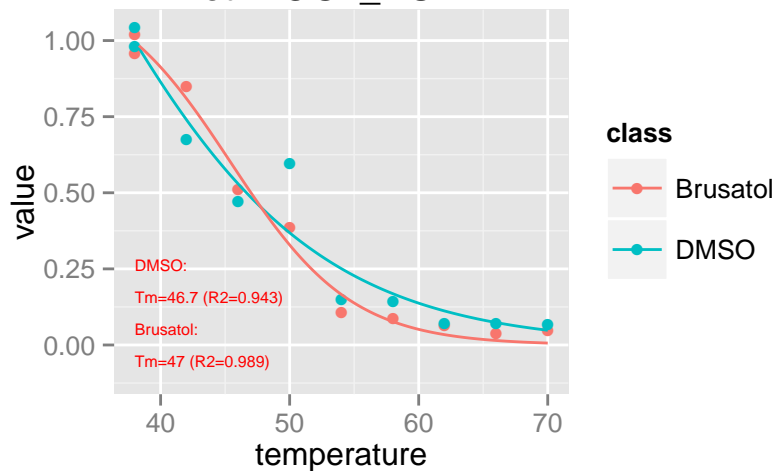

Prot: NOL3\_HUMAN

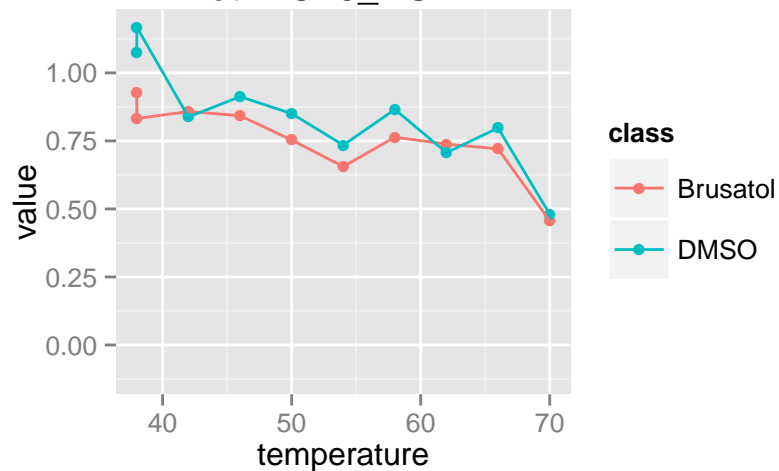

Prot: NOL7\_HUMAN

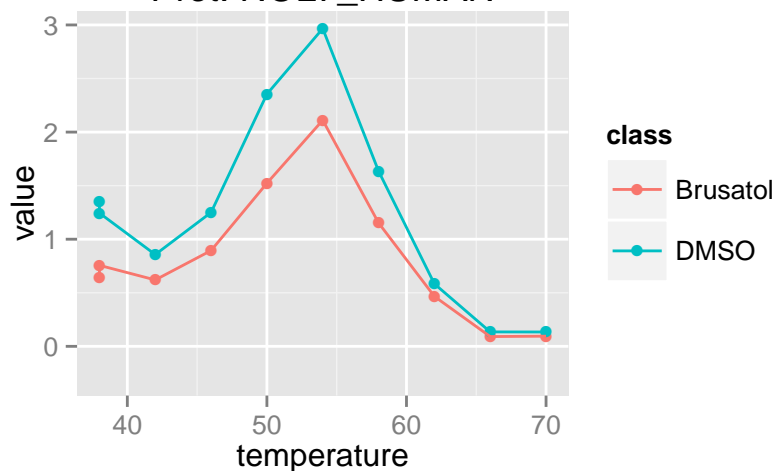

Prot: NOLC1\_HUMAN

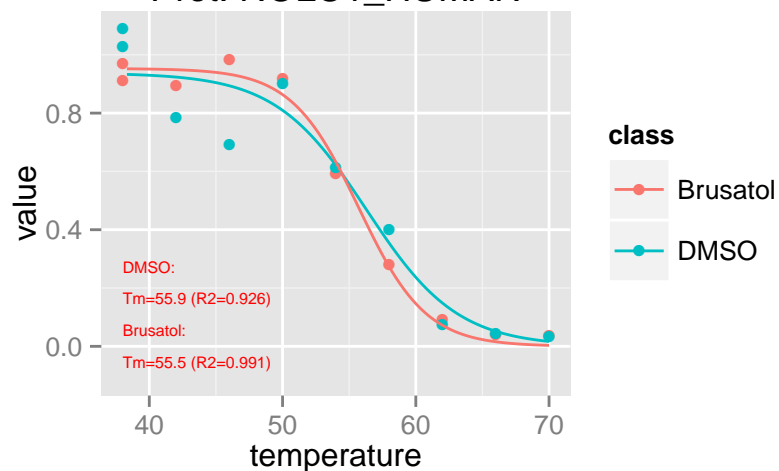

Prot: NONO\_HUMAN

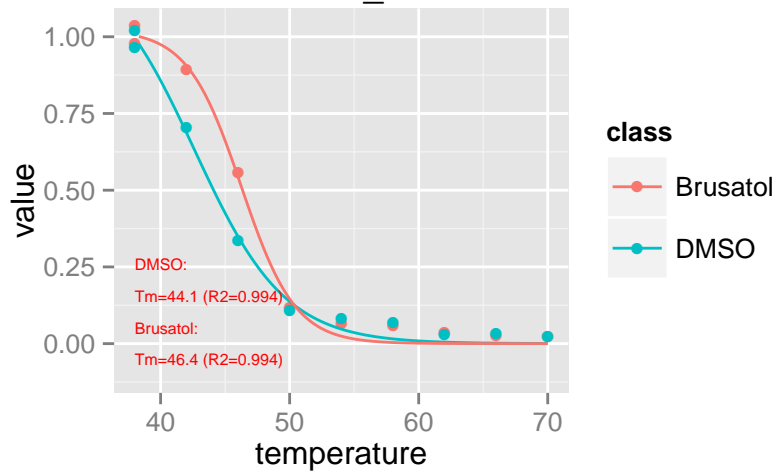

Prot: NOP14\_HUMAN

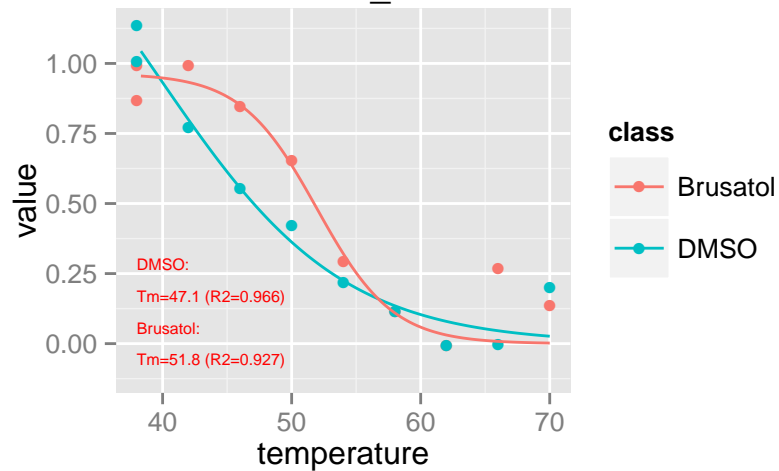

Prot: NOP16\_HUMAN

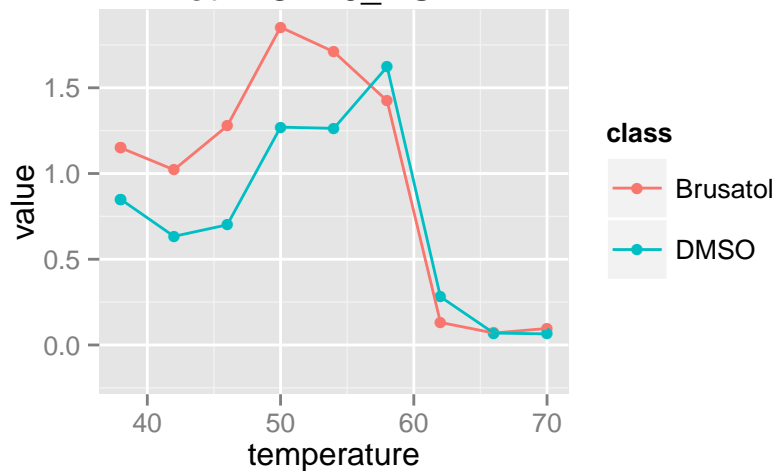

Prot: NOP2\_HUMAN

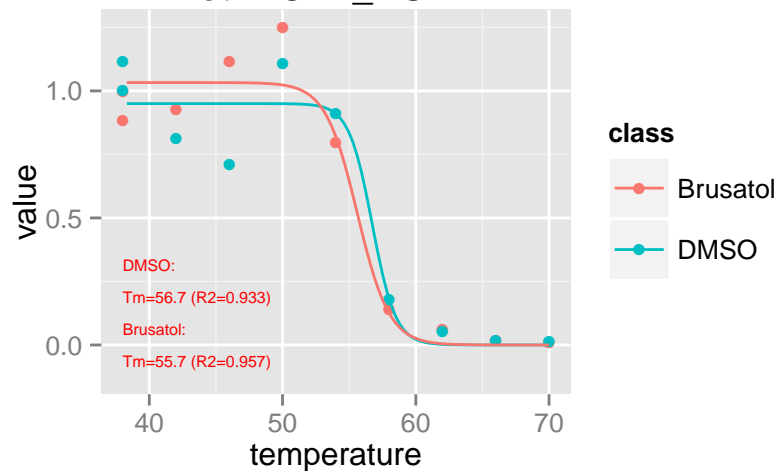

Prot: NOP58\_HUMAN

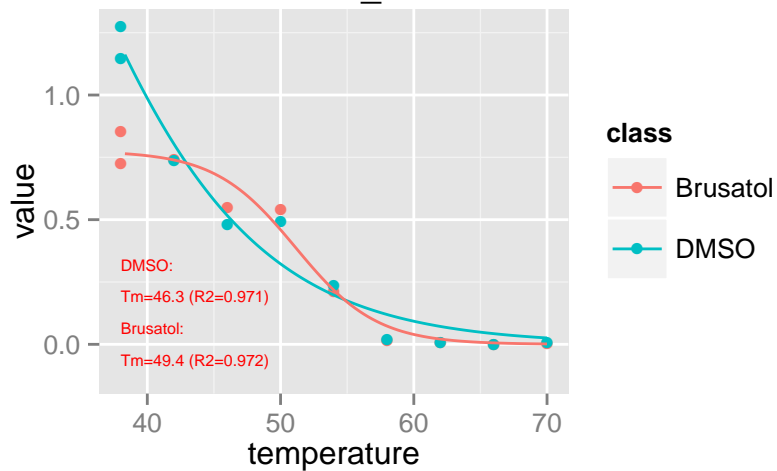

Prot: NOSIP\_HUMAN

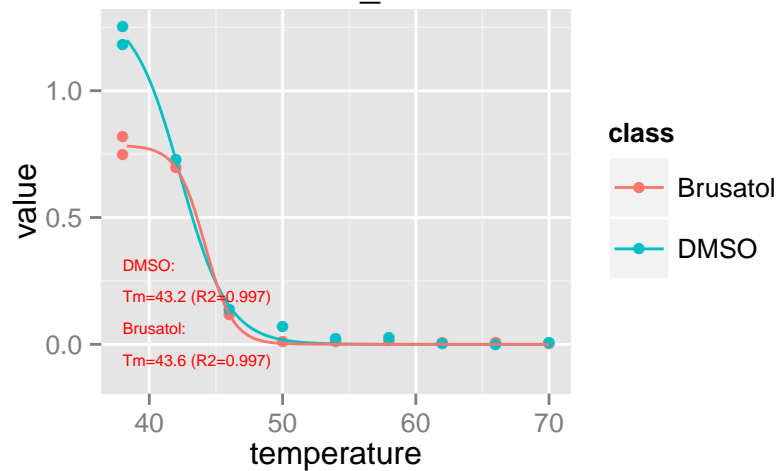

Prot: NP1L1\_HUMAN

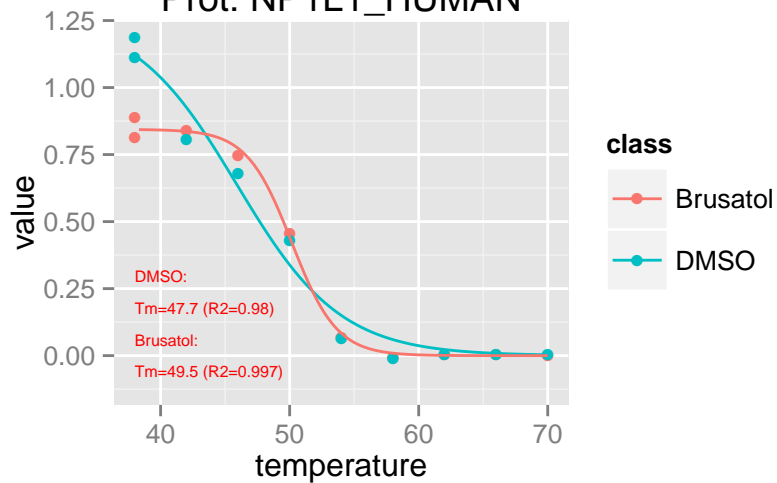

Prot: NP1L4\_HUMAN

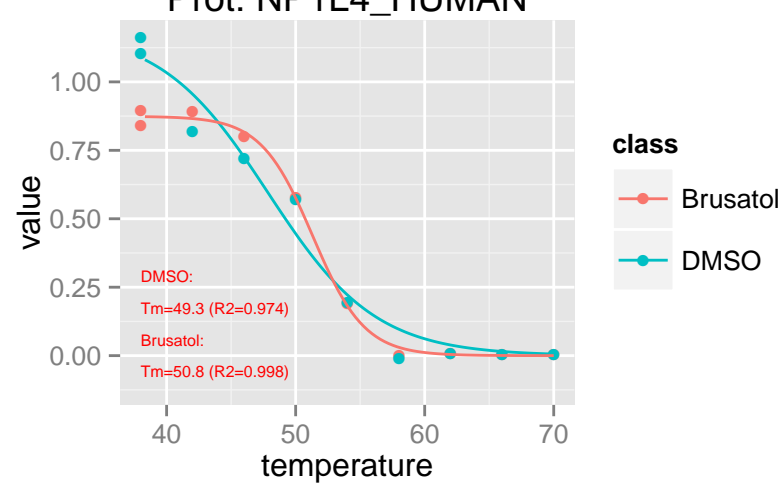

Prot: NPC2\_HUMAN

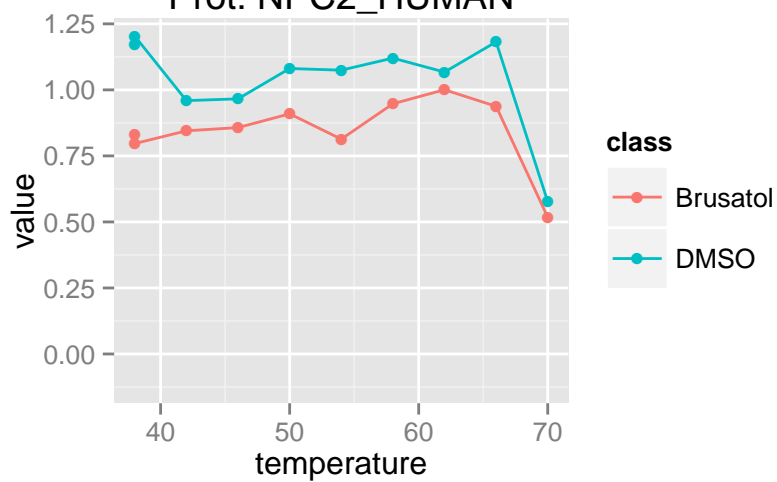

Prot: NPL4\_HUMAN

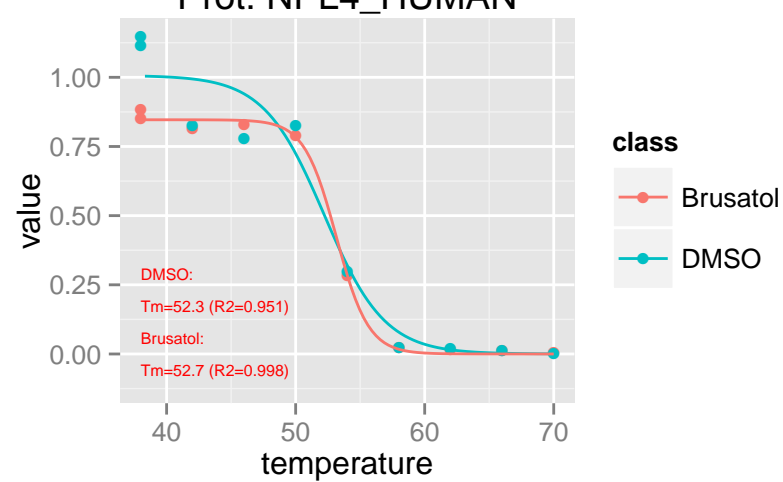

Prot: NPM\_HUMAN

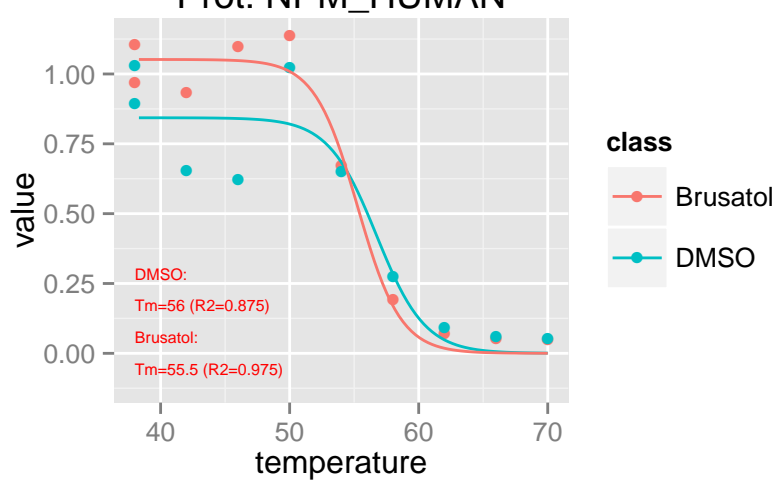

Prot: NPM3\_HUMAN

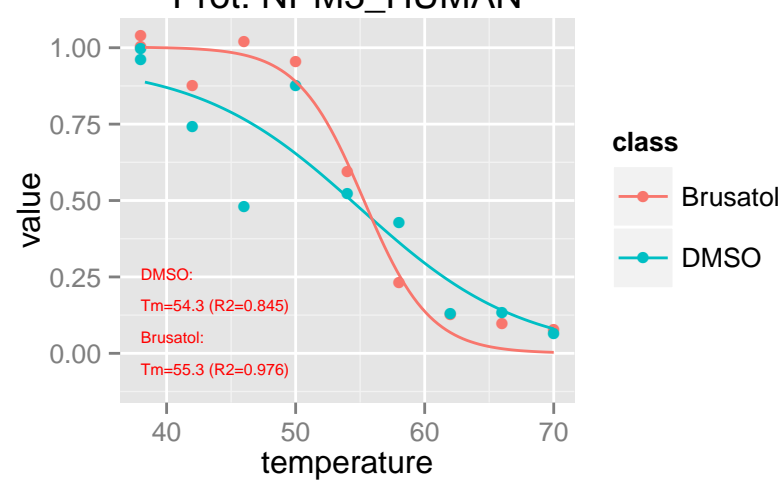

Prot: NQO1\_HUMAN

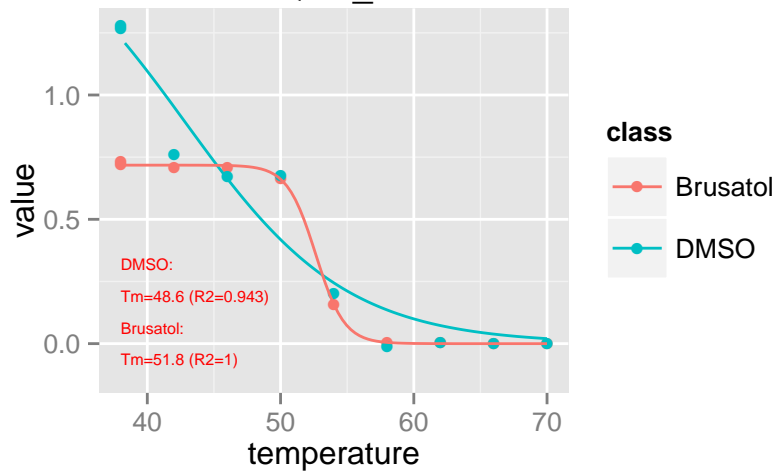

Prot: NQO2\_HUMAN

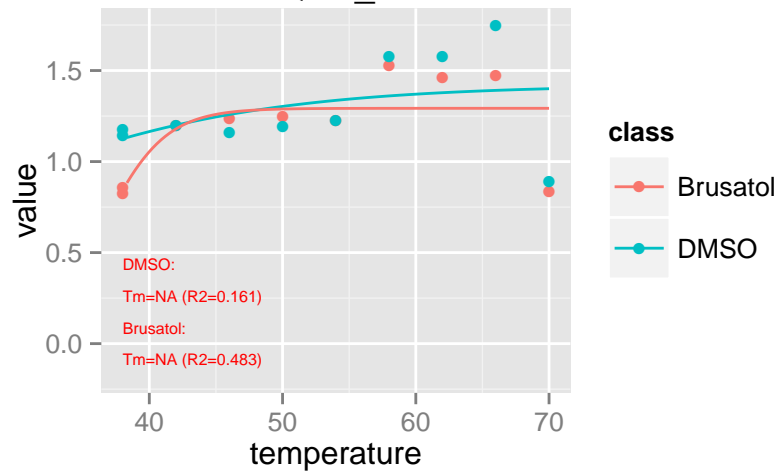

Prot: NR2CA\_HUMAN

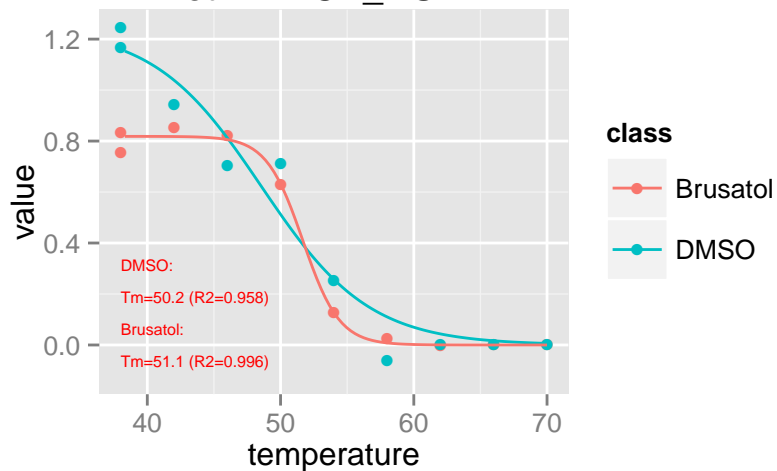

Prot: NRBP\_HUMAN

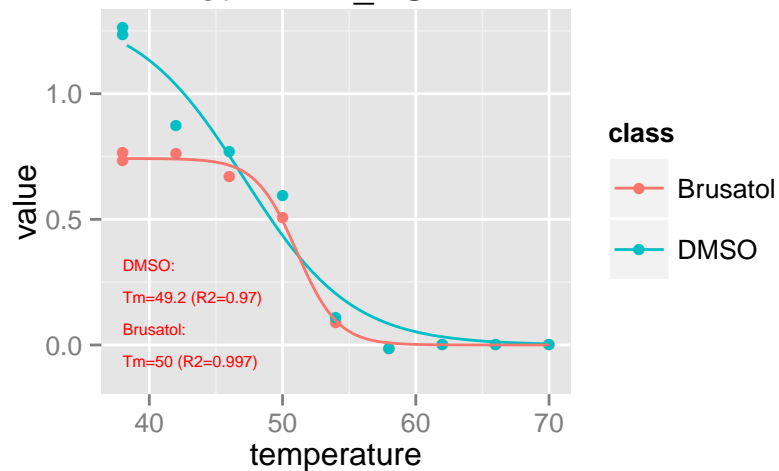

Prot: NRCAM\_HUMAN

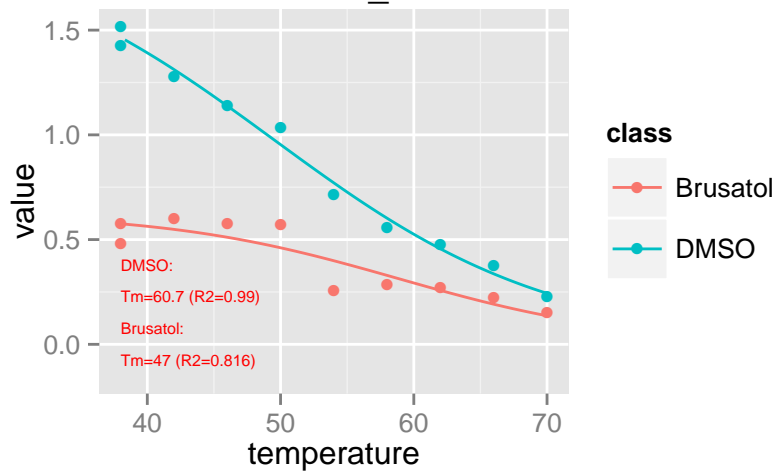

Prot: NRDC\_HUMAN

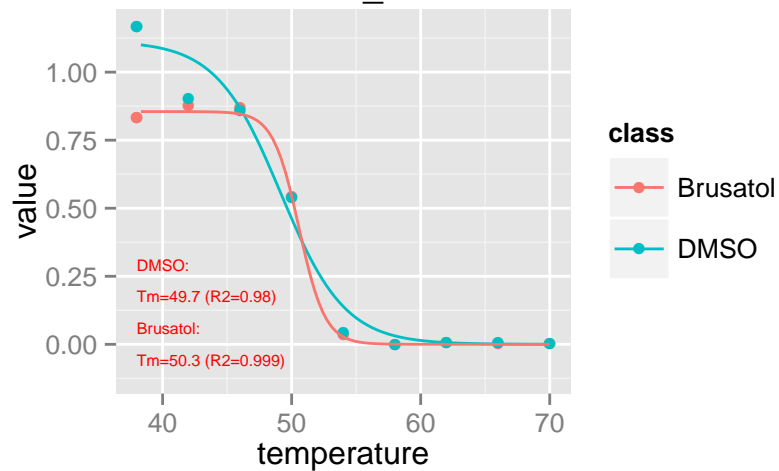

Prot: NS1BP\_HUMAN

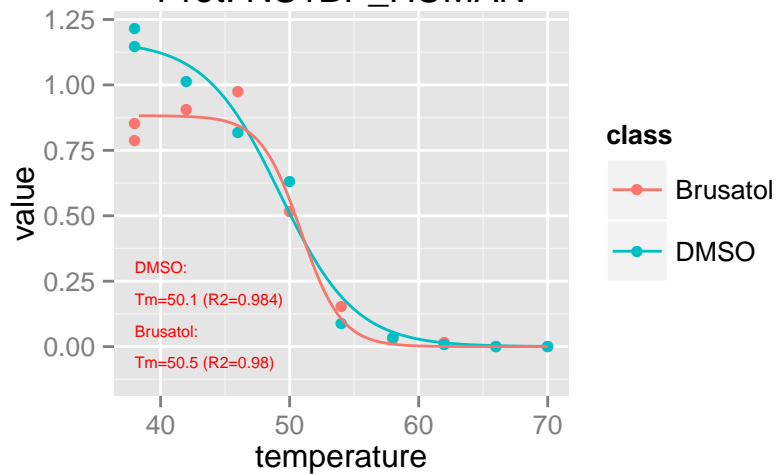

Prot: NSF\_HUMAN

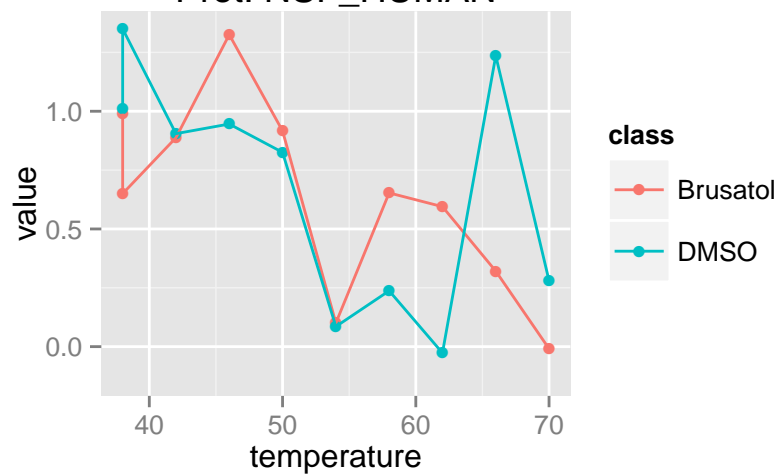

Prot: NSF1C\_HUMAN

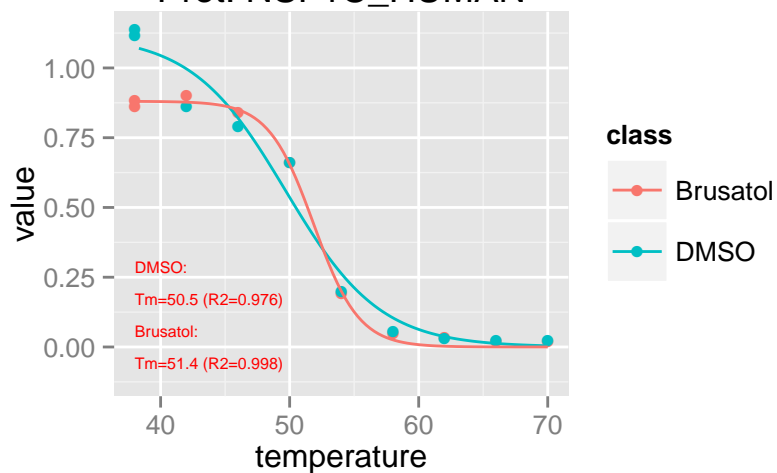

Prot: NSRP1\_HUMAN

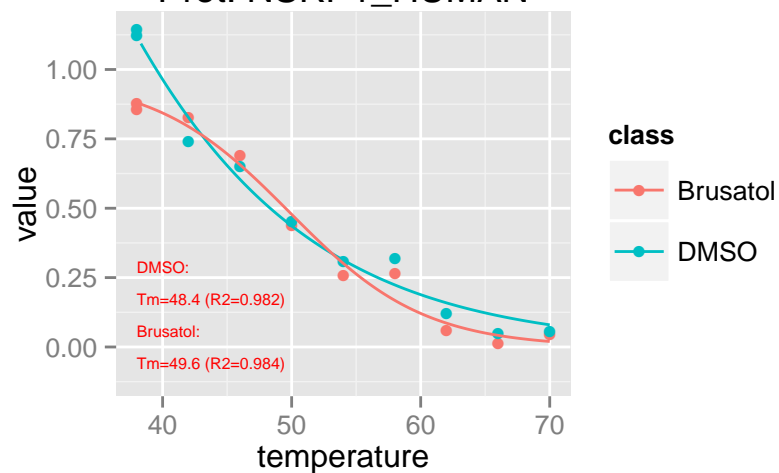

Prot: NSUN2\_HUMAN

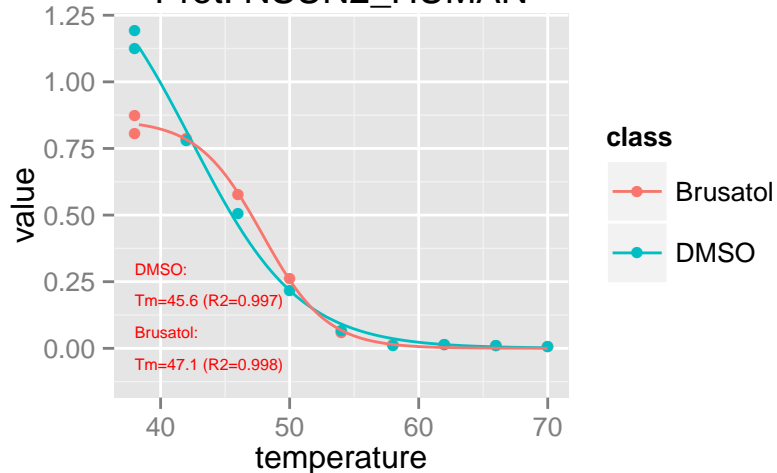

Prot: NT5C\_HUMAN

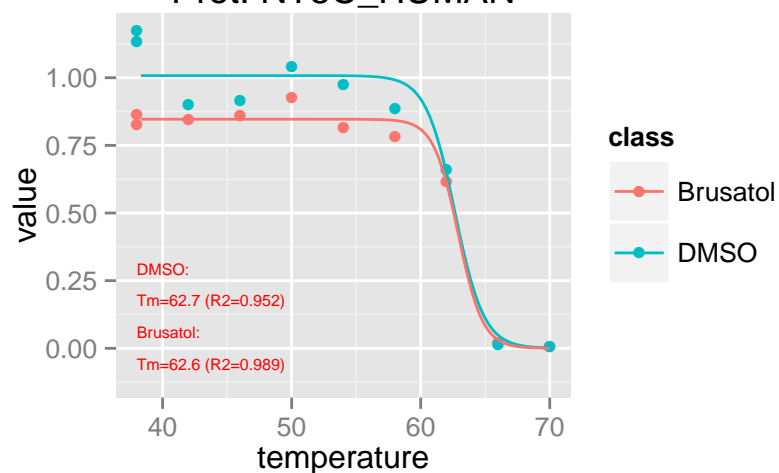

Prot: NT5D1\_HUMAN

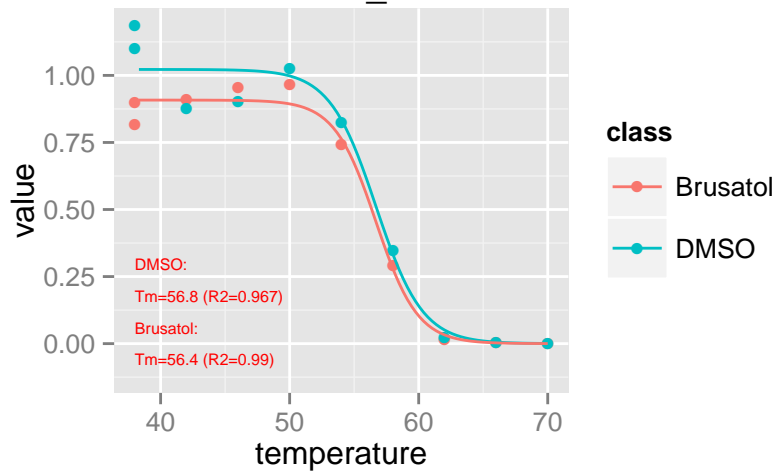

Prot: NTF2\_HUMAN

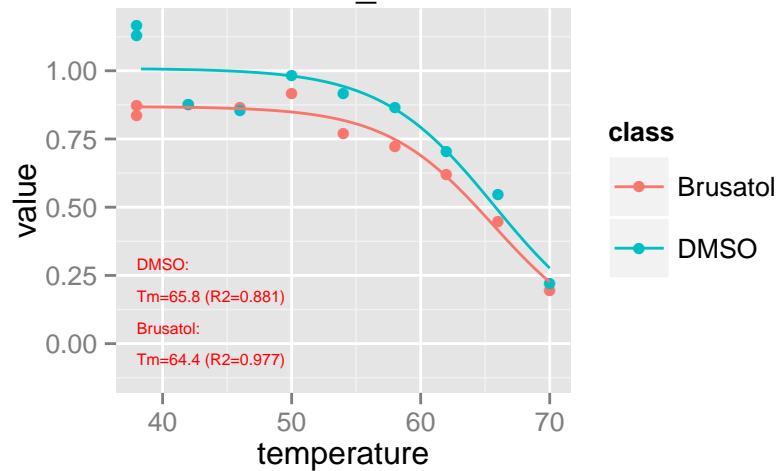

Prot: NTKL\_HUMAN

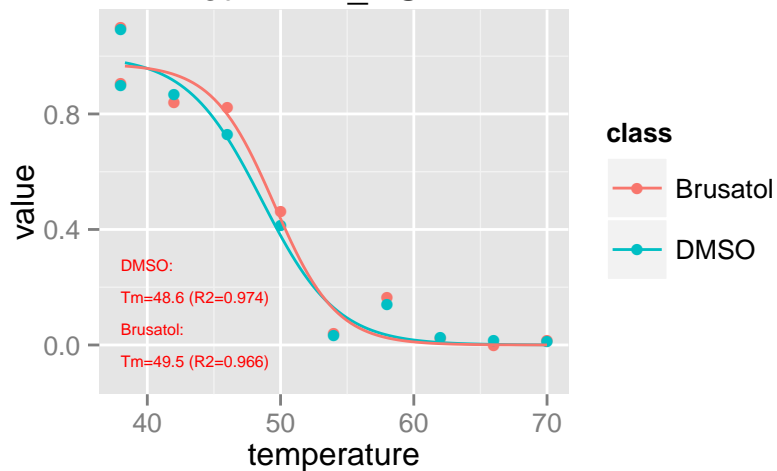

Prot: NTM1A\_HUMAN

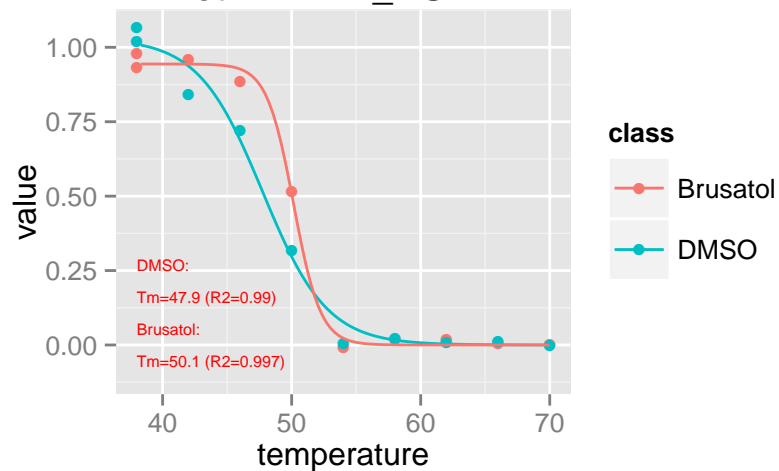

Prot: NTPCR\_HUMAN

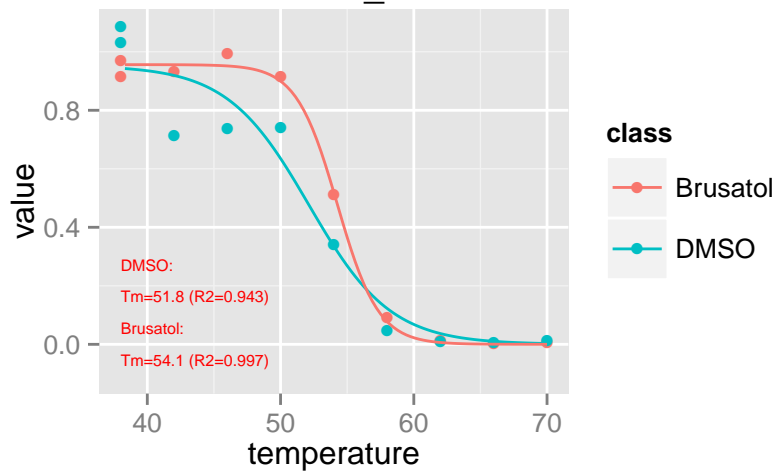

Prot: NU107\_HUMAN

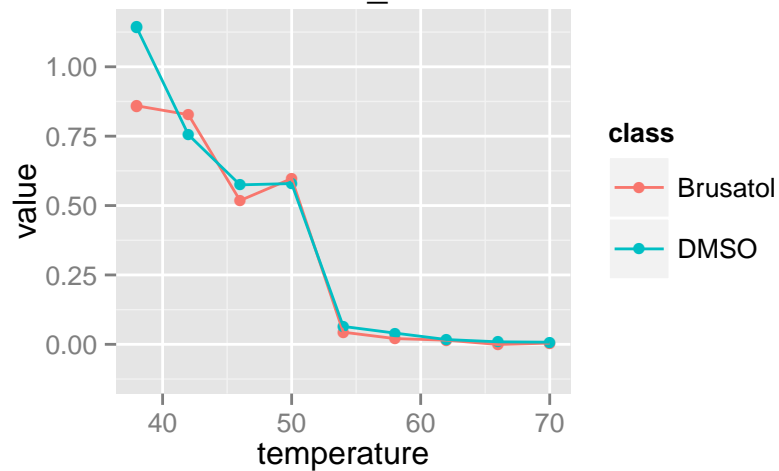



Prot: NU133\_HUMAN

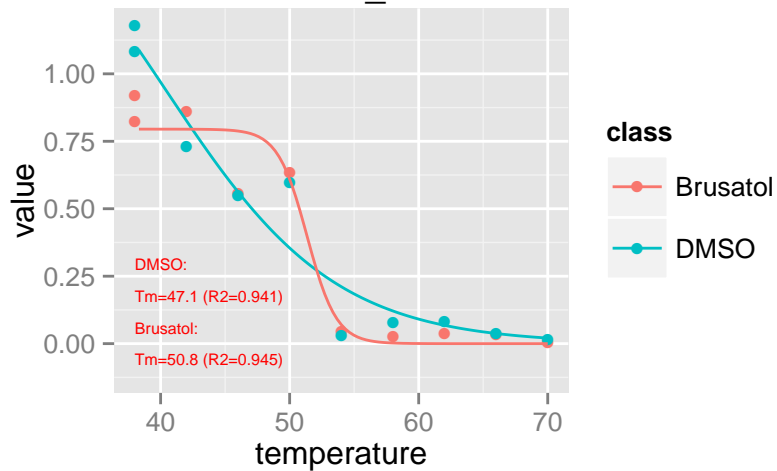

Prot: NU153\_HUMAN

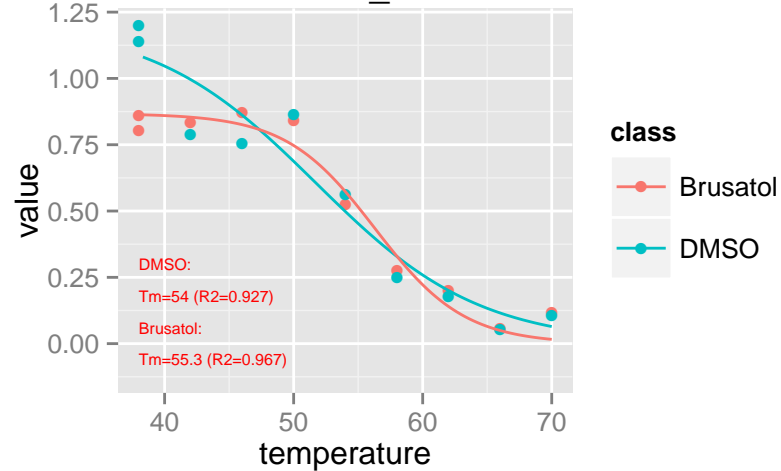

Prot: NU155\_HUMAN

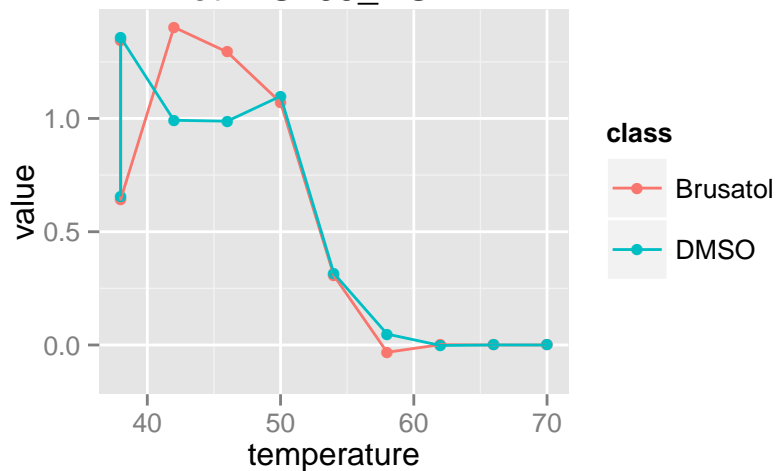

Prot: NU160\_HUMAN

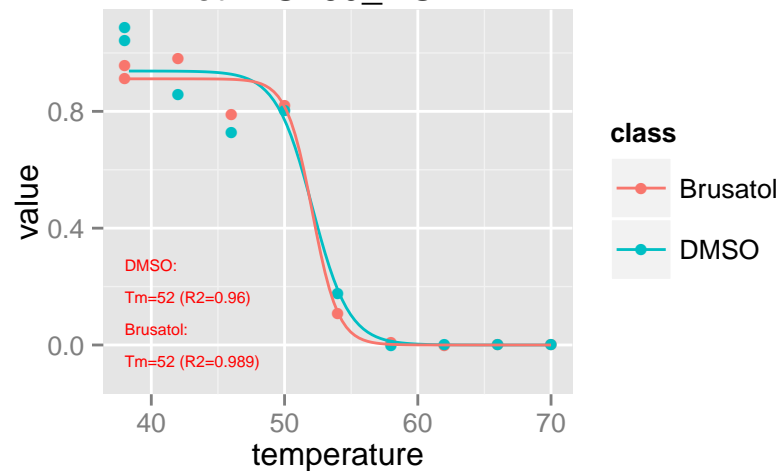

Prot: NU188\_HUMAN

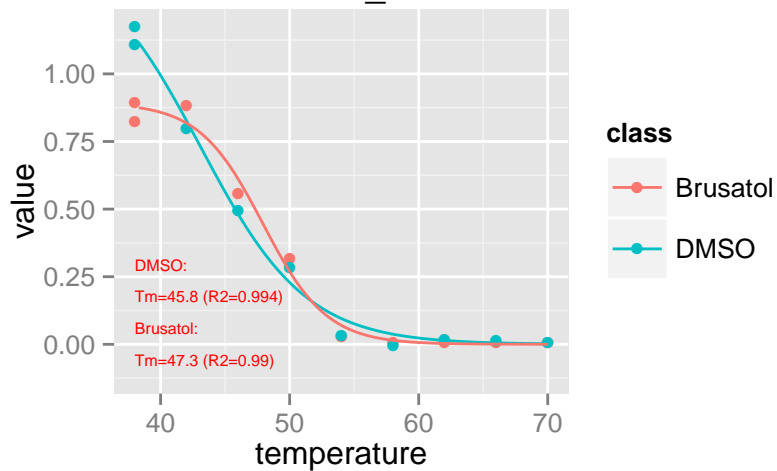

Prot: NU205\_HUMAN

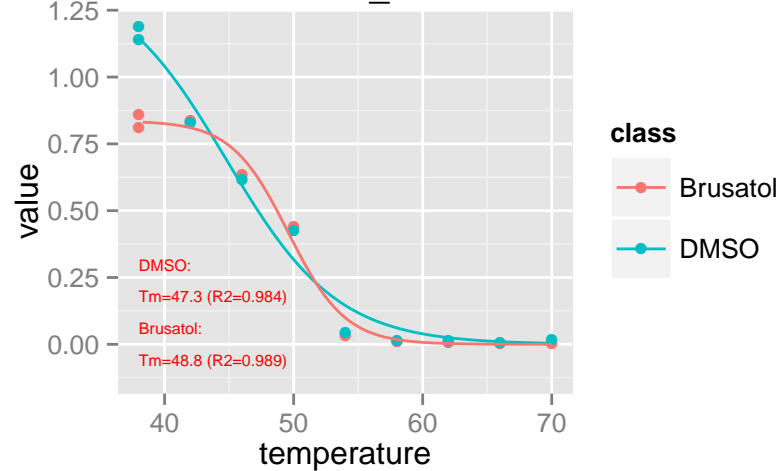

Prot: NU214\_HUMAN

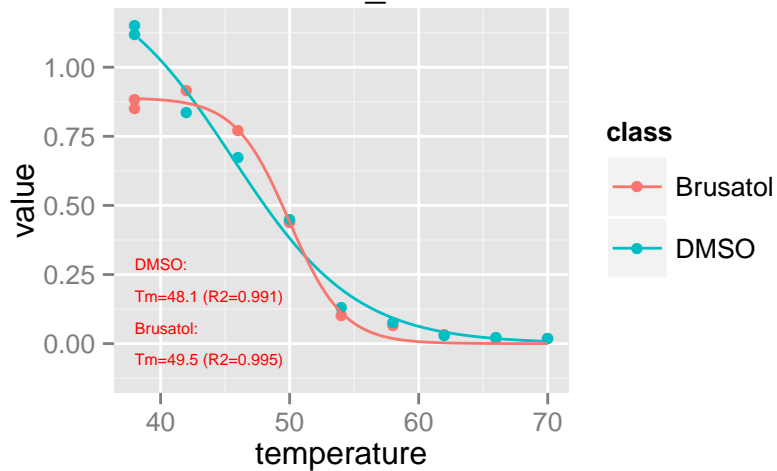

Prot: NUB1\_HUMAN

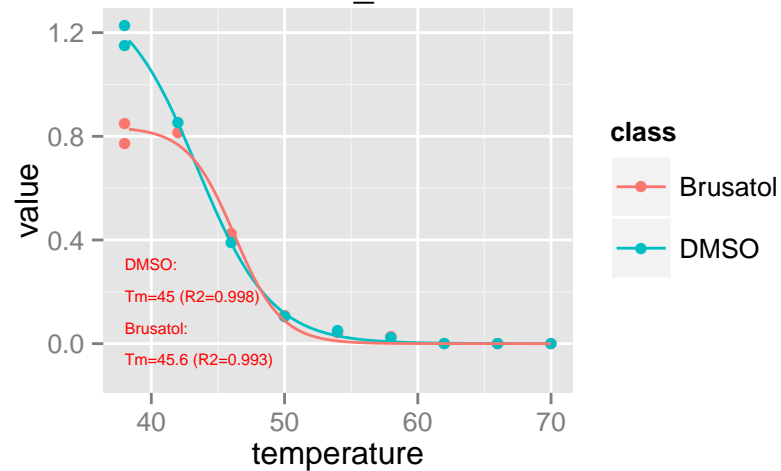

Prot: NUBP1\_HUMAN

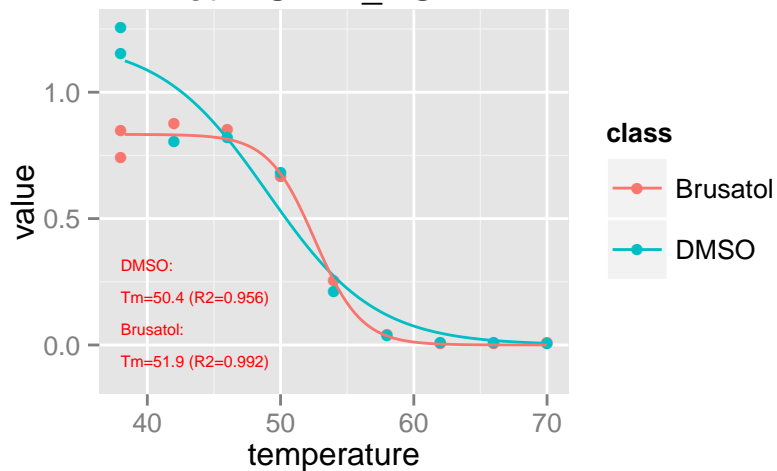

Prot: NUBP2\_HUMAN

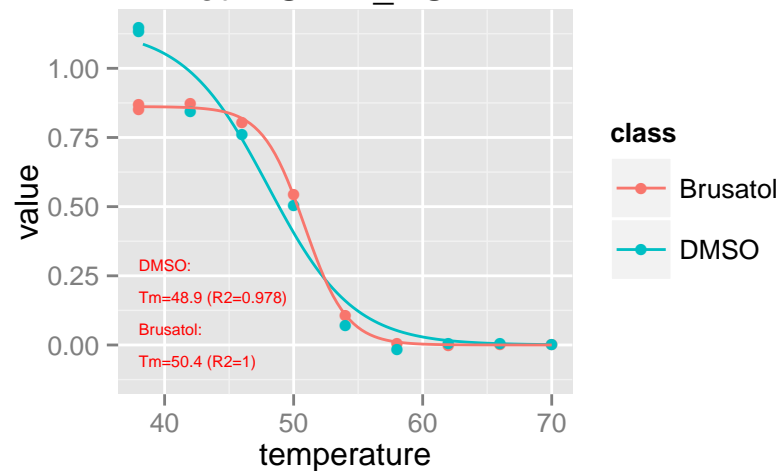

Prot: NUBPL\_HUMAN

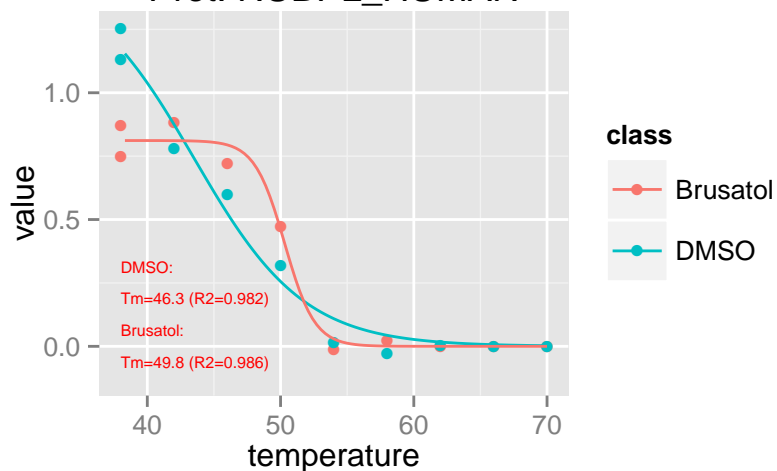

Prot: NUCB1\_HUMAN

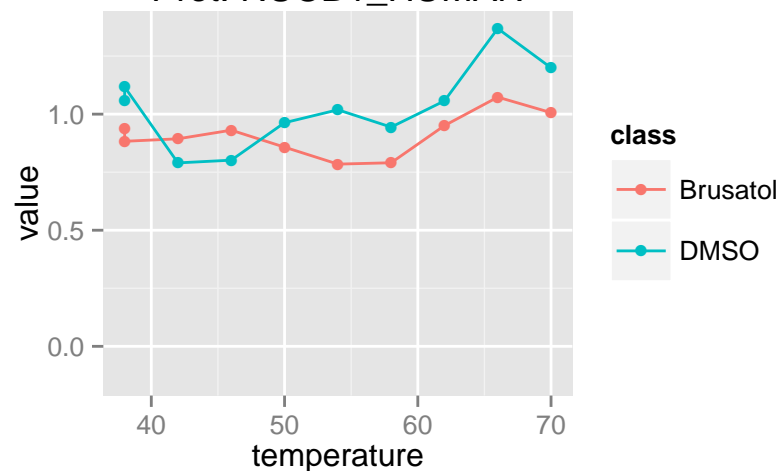

Prot: NUCB2\_HUMAN

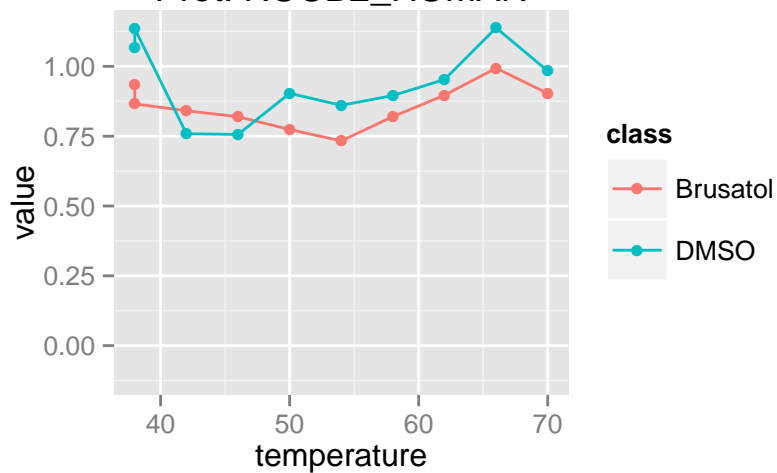

Prot: NUCKS\_HUMAN

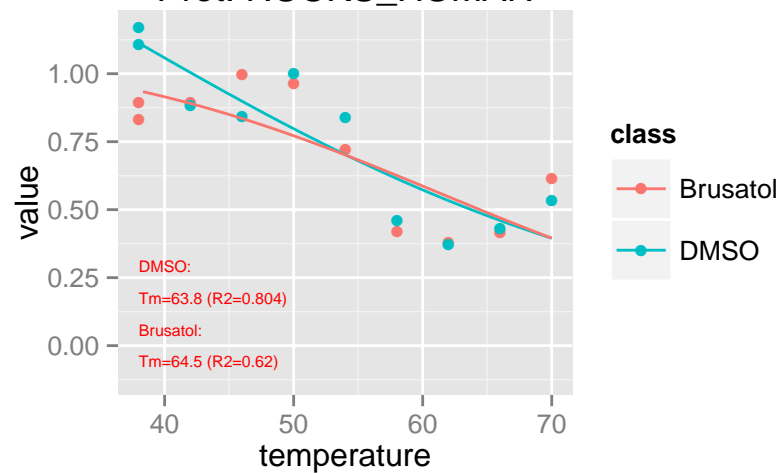

Prot: NUCL\_HUMAN

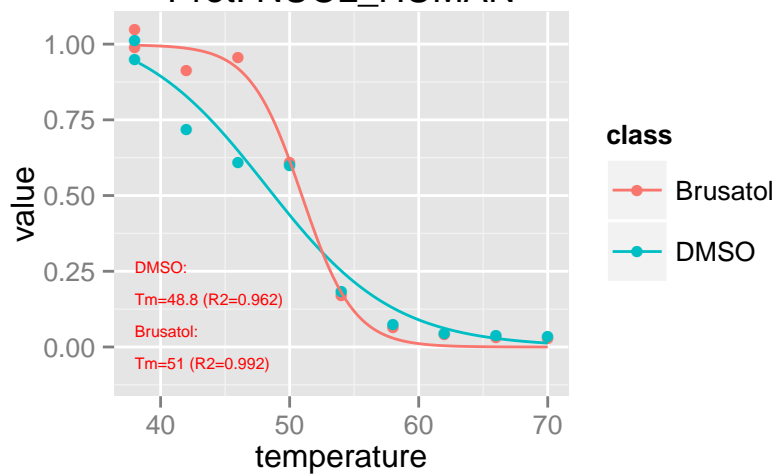

Prot: NUD16\_HUMAN

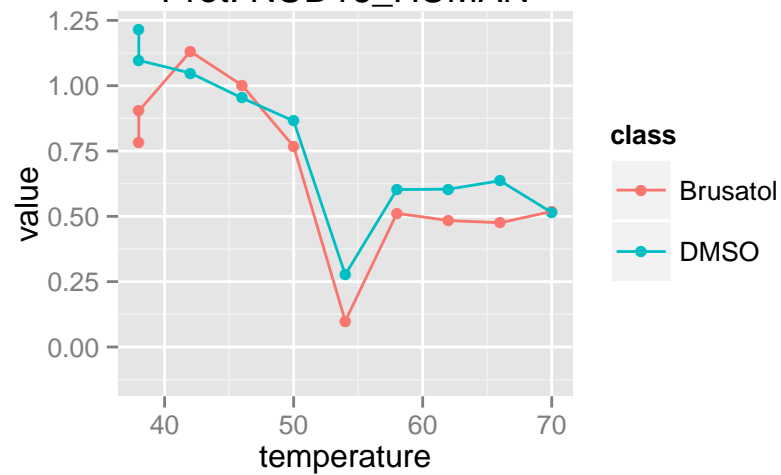

Prot: NUD19\_HUMAN

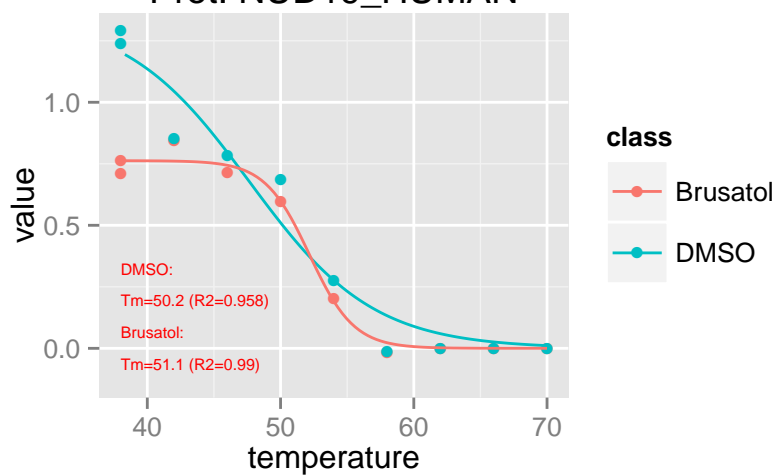

Prot: NUDC\_HUMAN

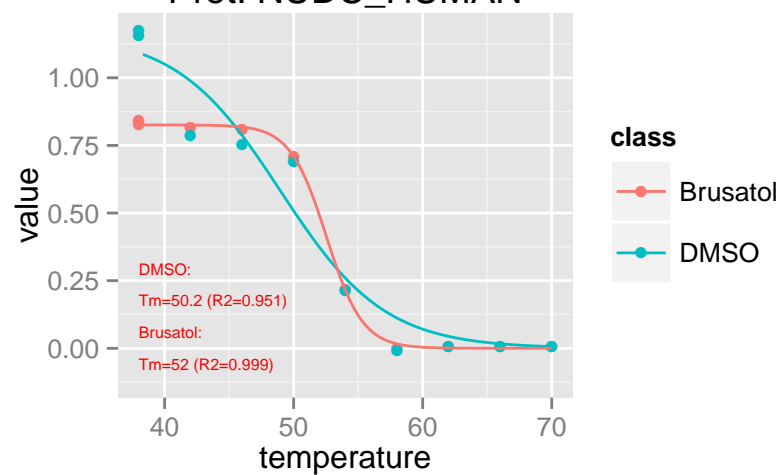

Prot: NUDC1\_HUMAN

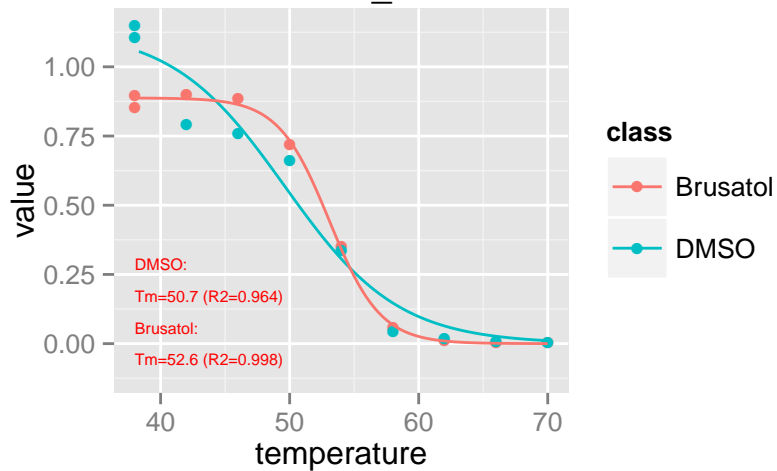

Prot: NUDC2\_HUMAN

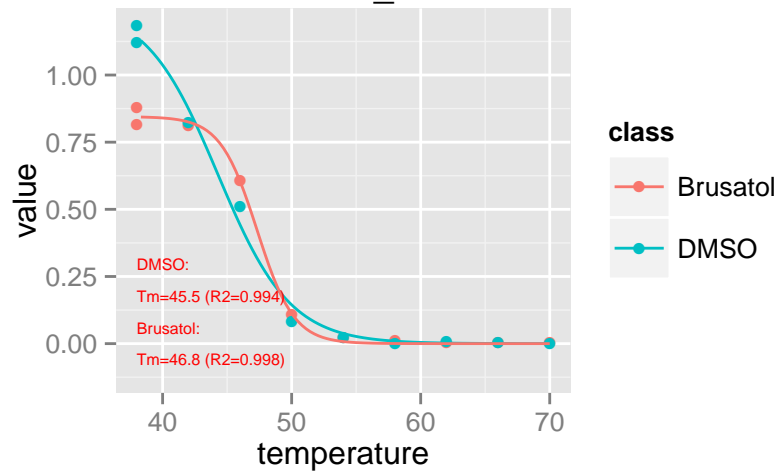

Prot: NUDC3\_HUMAN

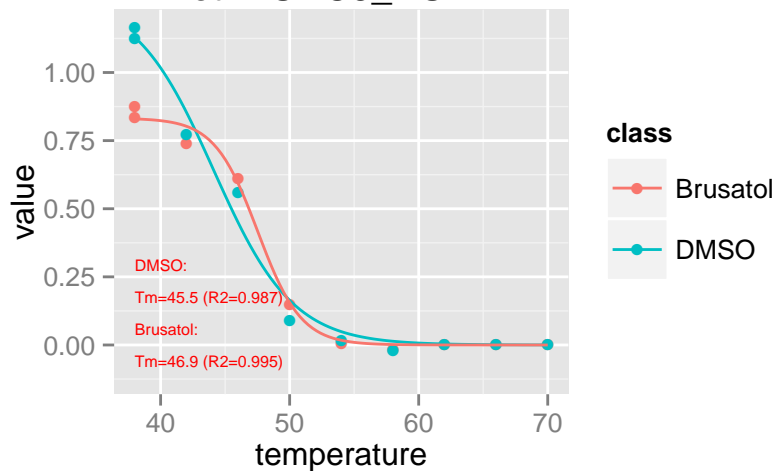

Prot: NUDT3\_HUMAN

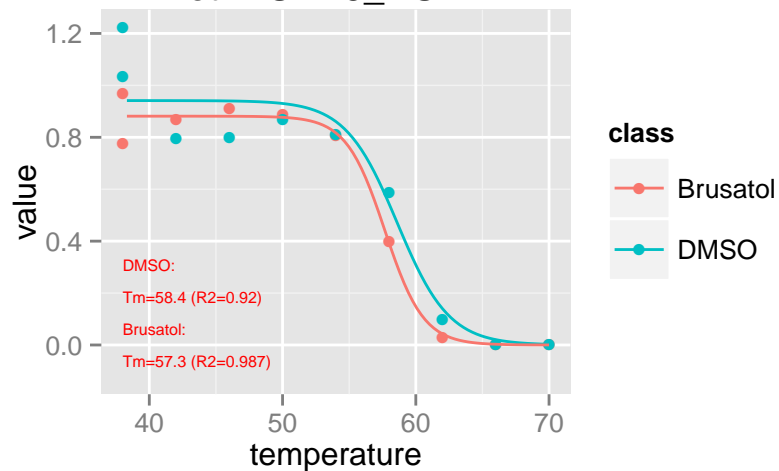

Prot: NUDT4\_HUMAN

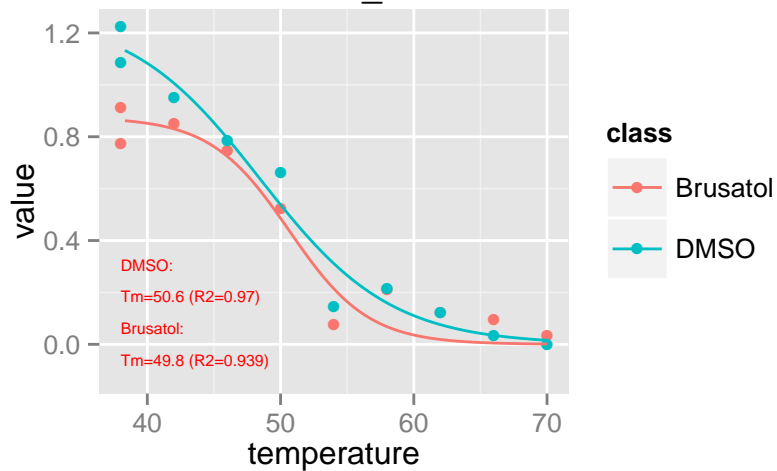

Prot: NUDT5\_HUMAN

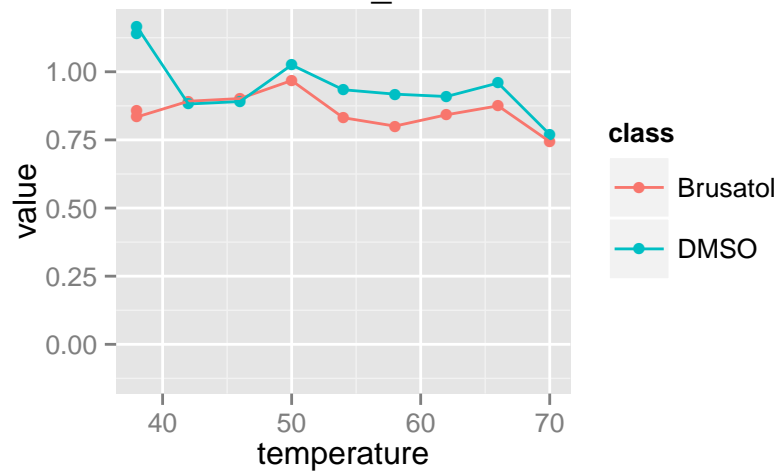

Prot: NUDT9\_HUMAN

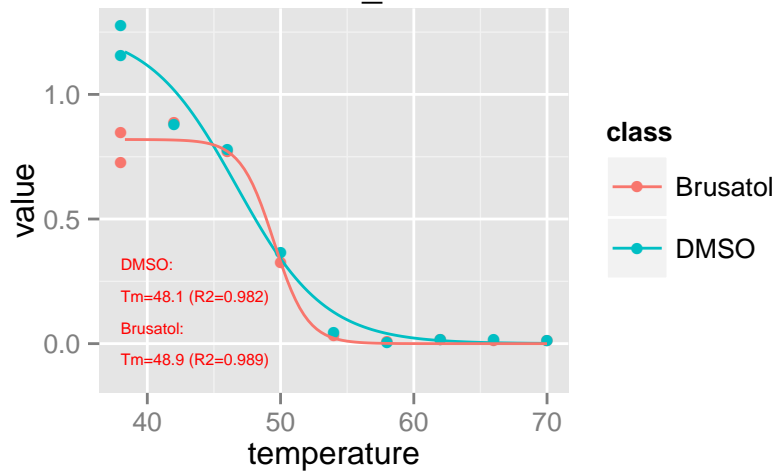

Prot: NUF2\_HUMAN

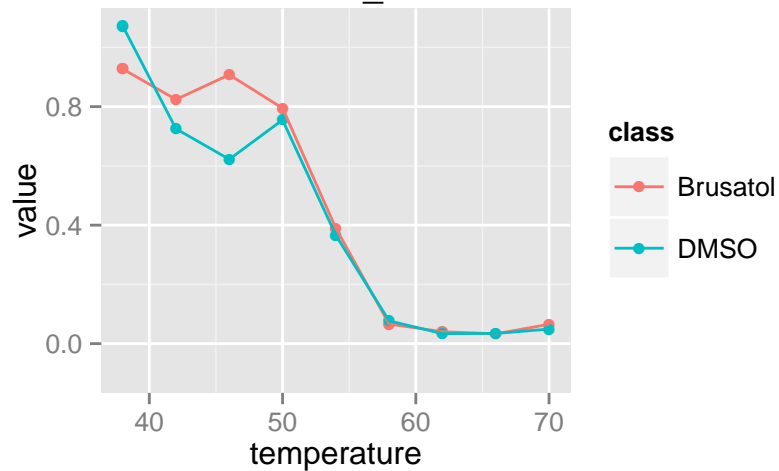

Prot: NUMA1\_HUMAN

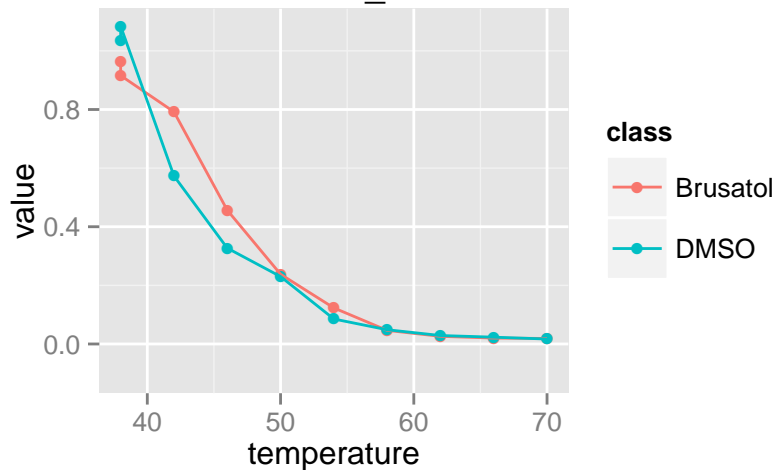

Prot: NUMB\_HUMAN

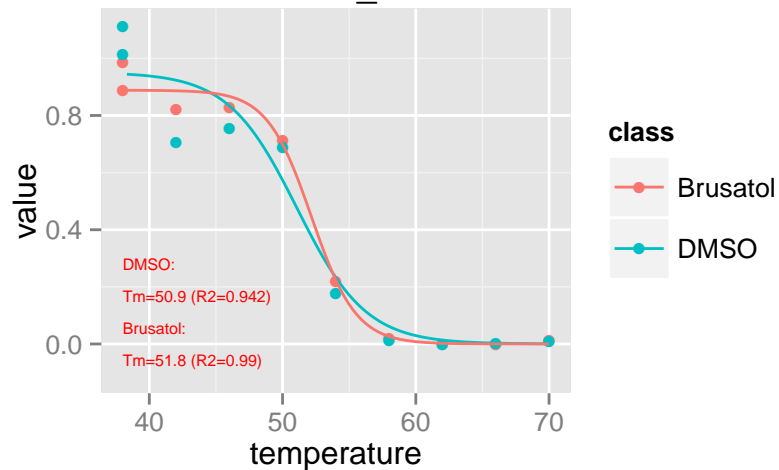

Prot: NUMBL\_HUMAN

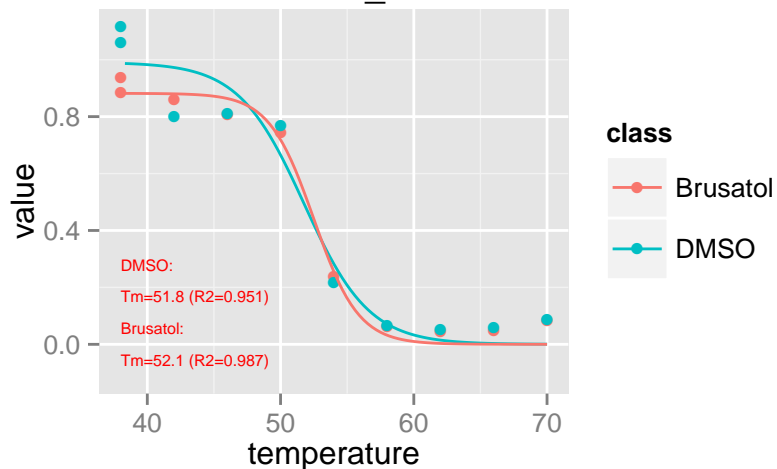

Prot: NUP37\_HUMAN

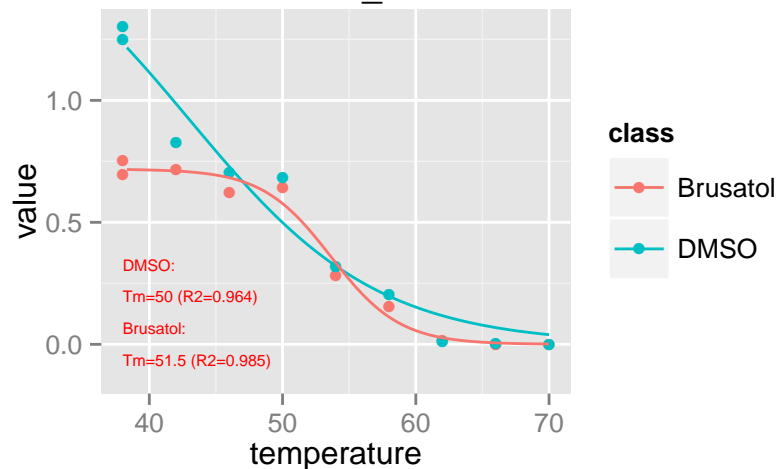

Prot: NUP43\_HUMAN

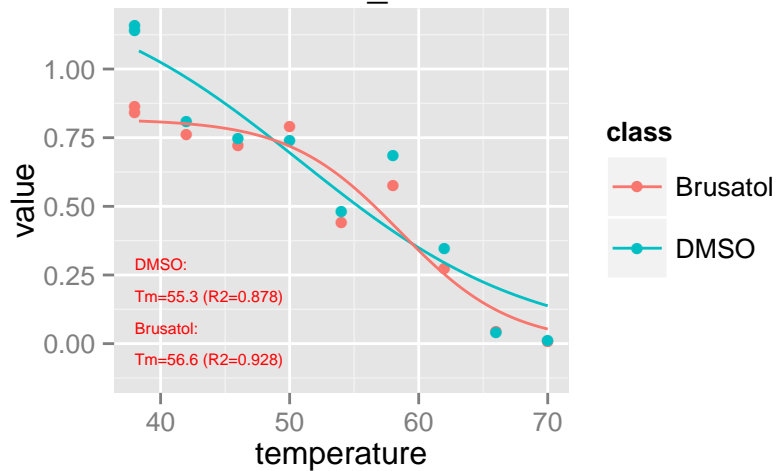

Prot: NUP50\_HUMAN

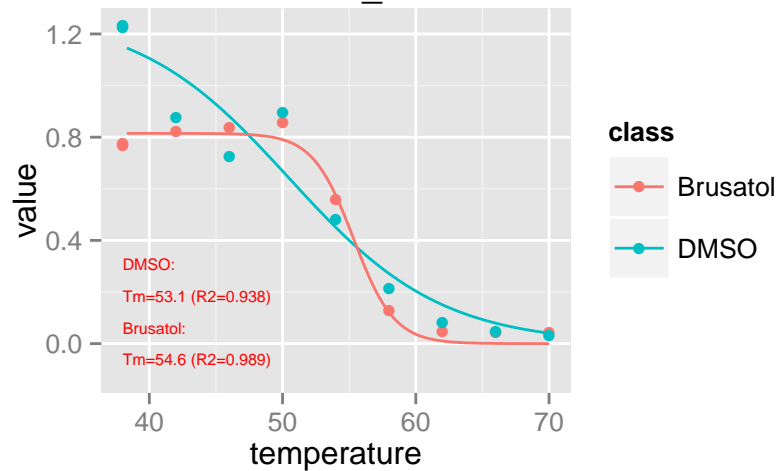

Prot: NUP54\_HUMAN

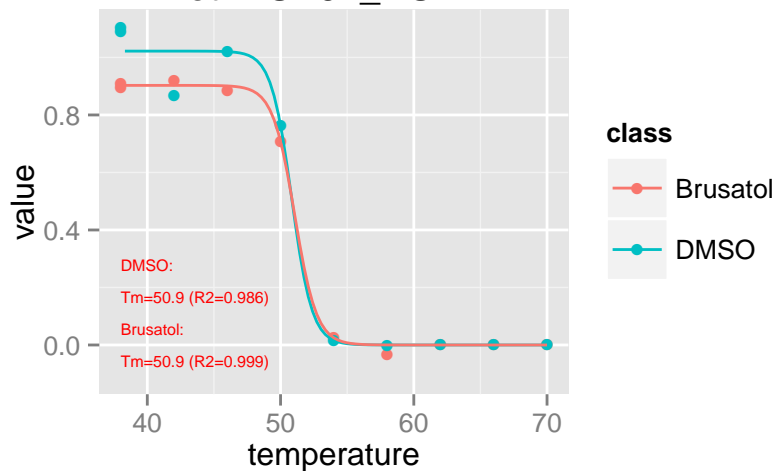

Prot: NUP62\_HUMAN

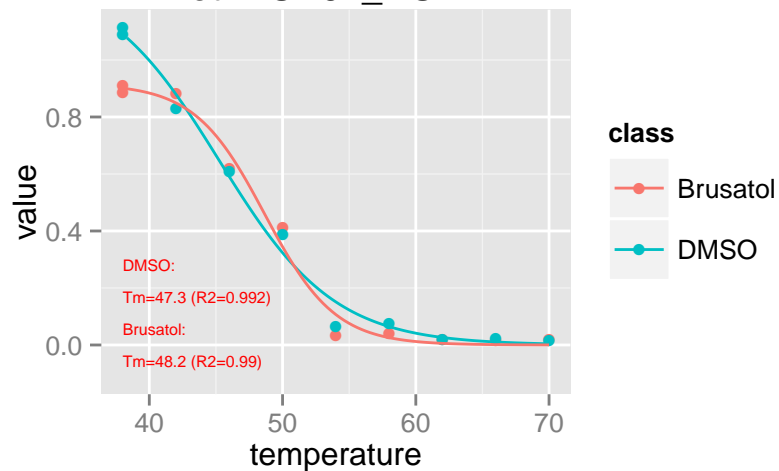

Prot: NUP85\_HUMAN

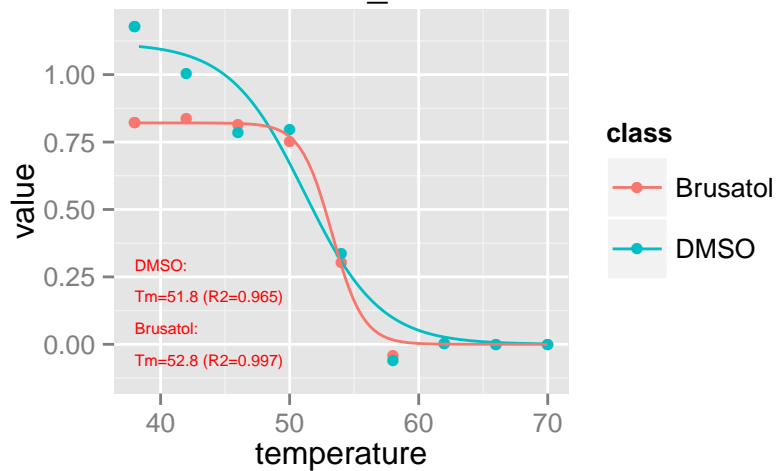

Prot: NUP88\_HUMAN

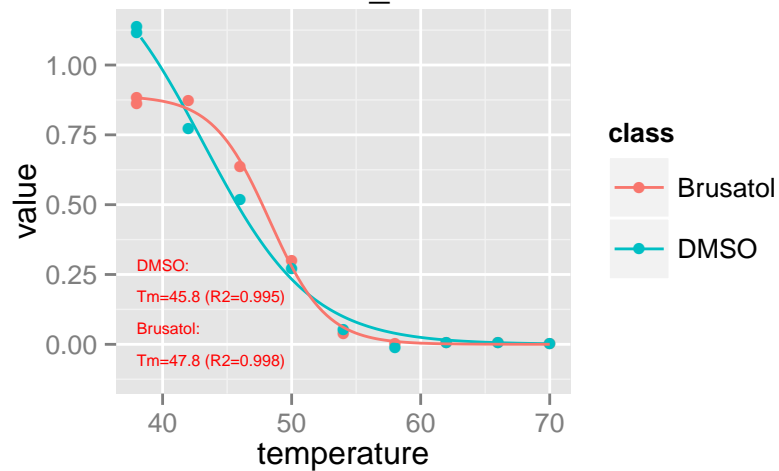

Prot: NUP93\_HUMAN

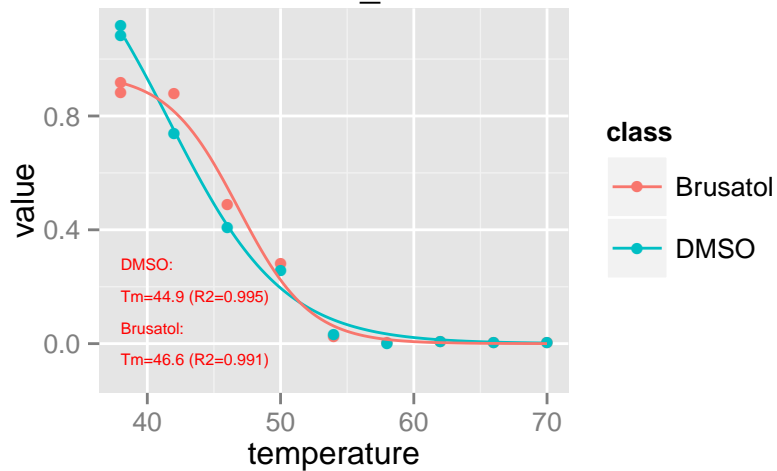

Prot: NUP98\_HUMAN

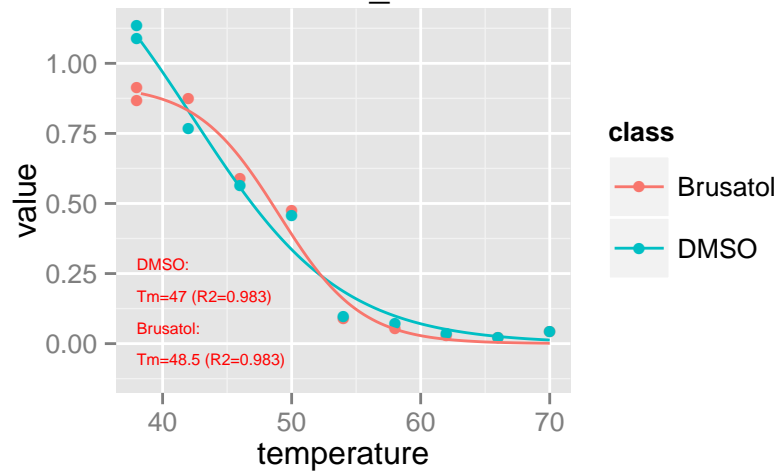

Prot: NXN\_HUMAN

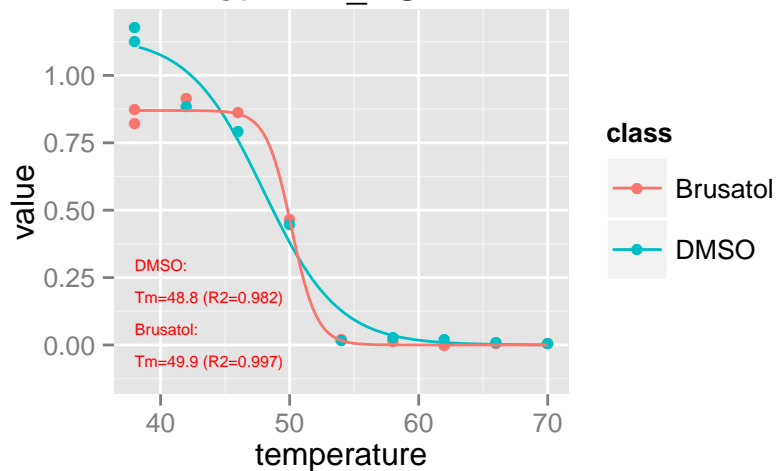

Prot: NXP20\_HUMAN

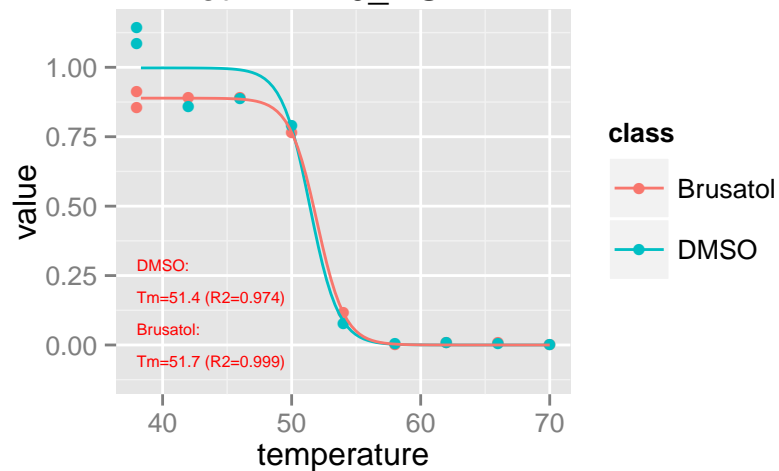

Prot: OAS3\_HUMAN

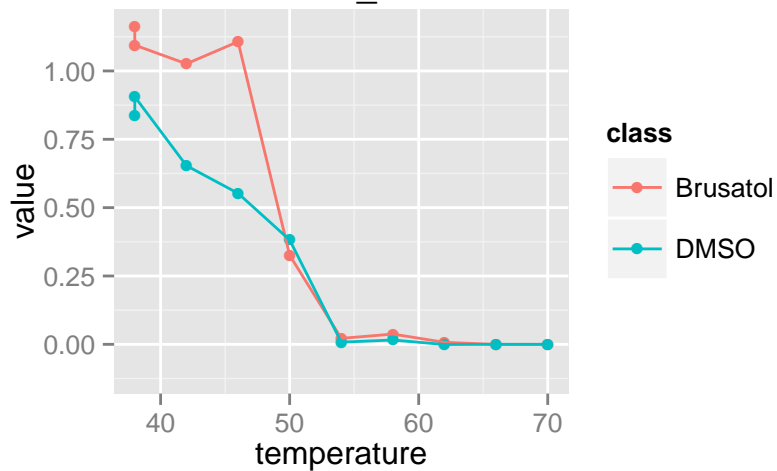

Prot: OAT\_HUMAN

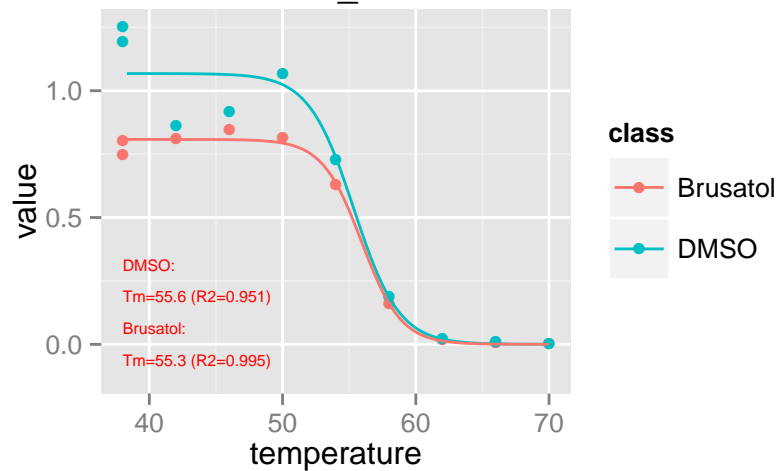

Prot: OCRL\_HUMAN

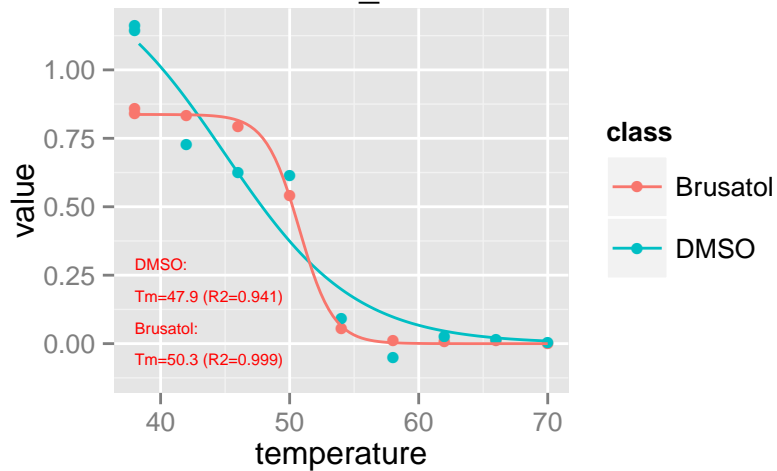

Prot: ODO1\_HUMAN

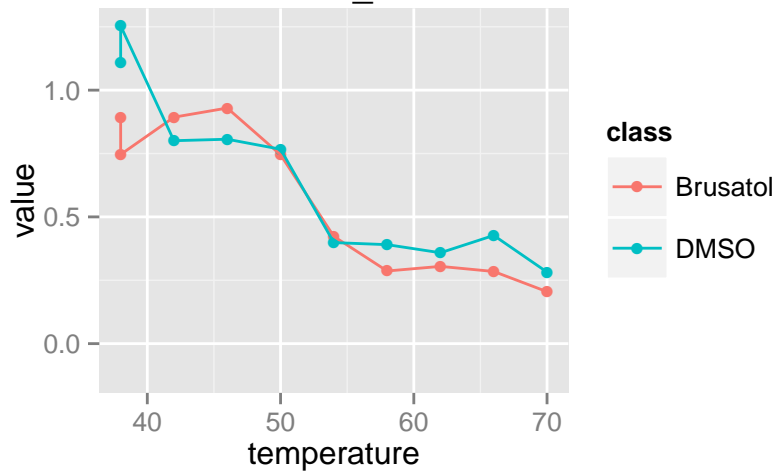

Prot: ODO2\_HUMAN

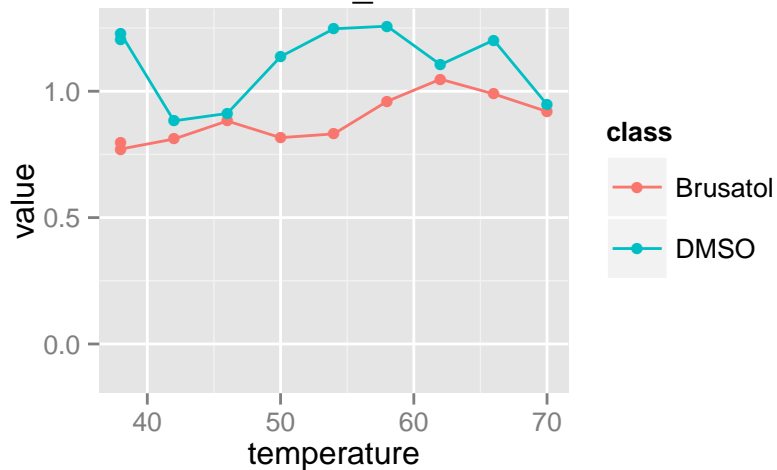

Prot: ODP2\_HUMAN

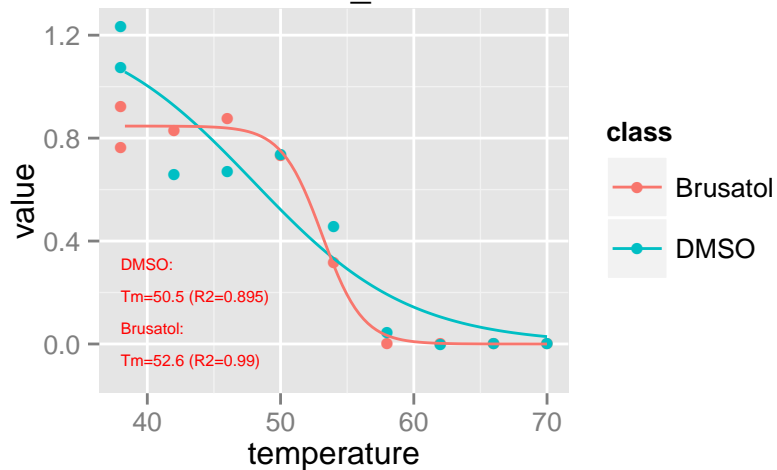

Prot: ODPA\_HUMAN

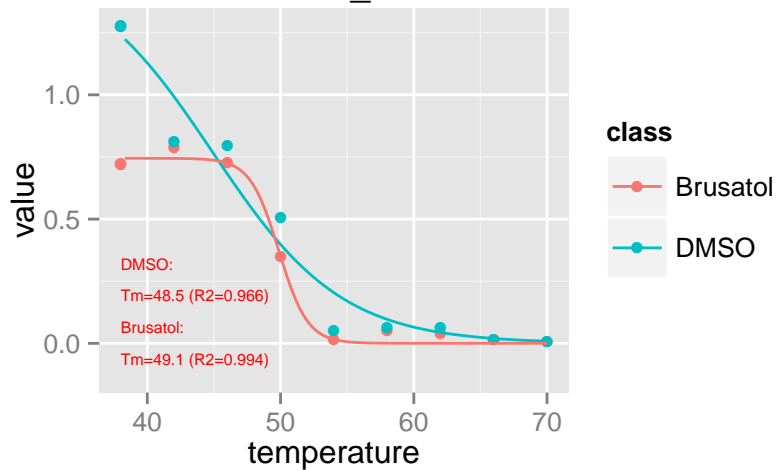

Prot: ODPB\_HUMAN

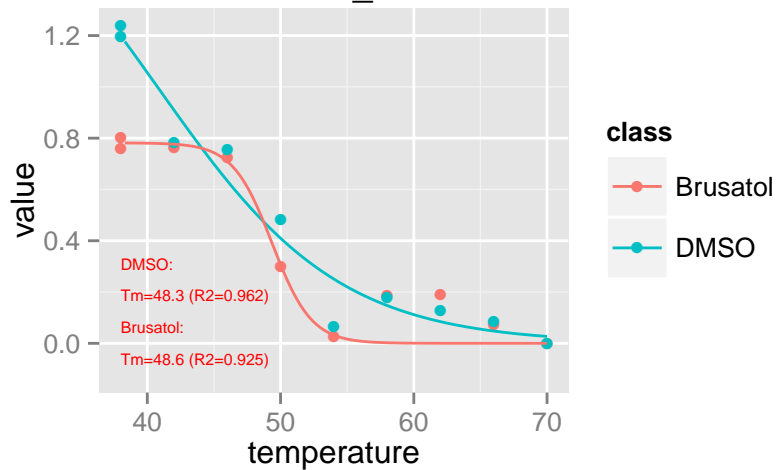



Prot: ODPX\_HUMAN

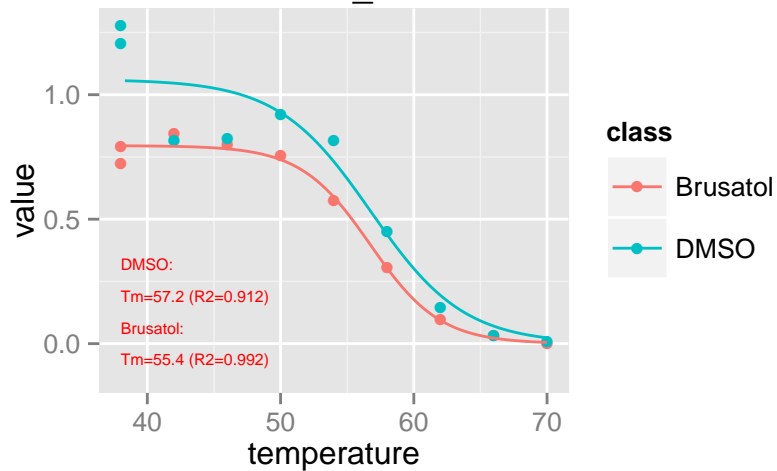

Prot: OFUT1\_HUMAN

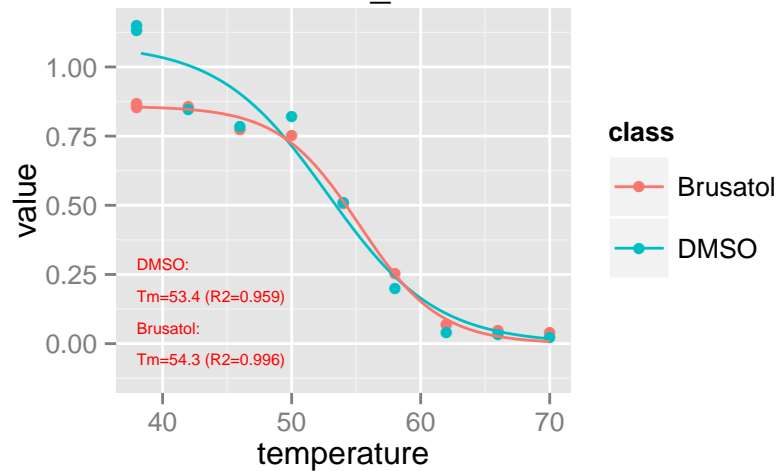

Prot: OGFD1\_HUMAN

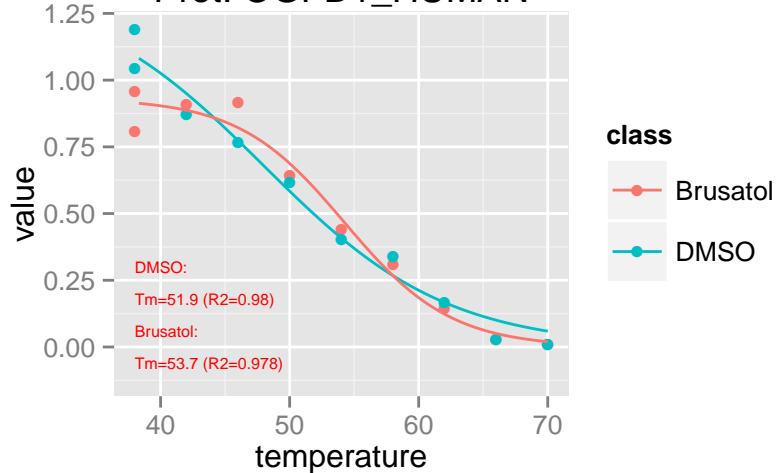

Prot: OGFR\_HUMAN

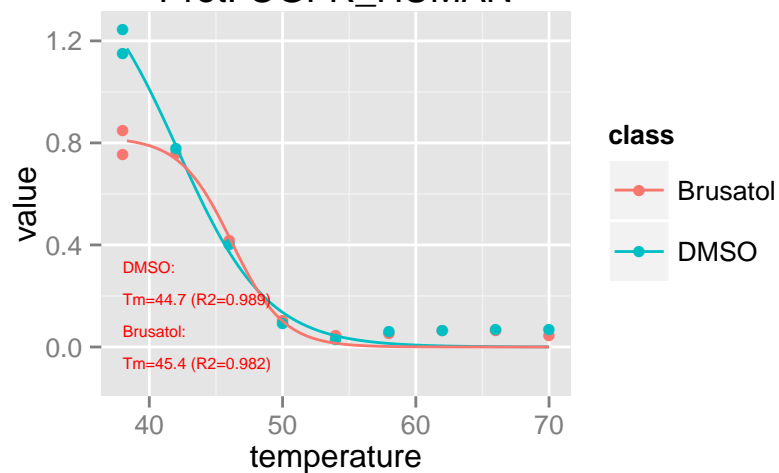

Prot: OGT1\_HUMAN

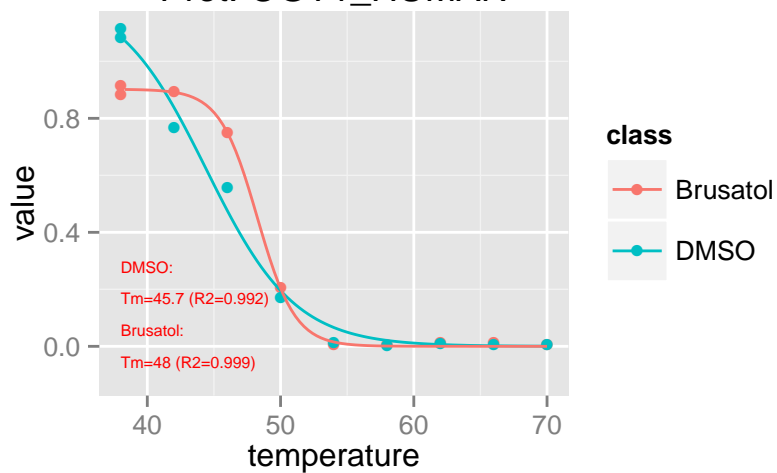

Prot: OLA1\_HUMAN

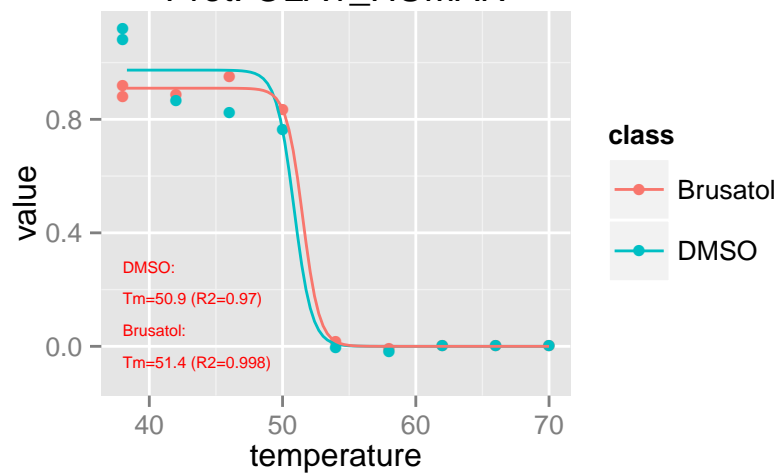

Prot: OPTN\_HUMAN

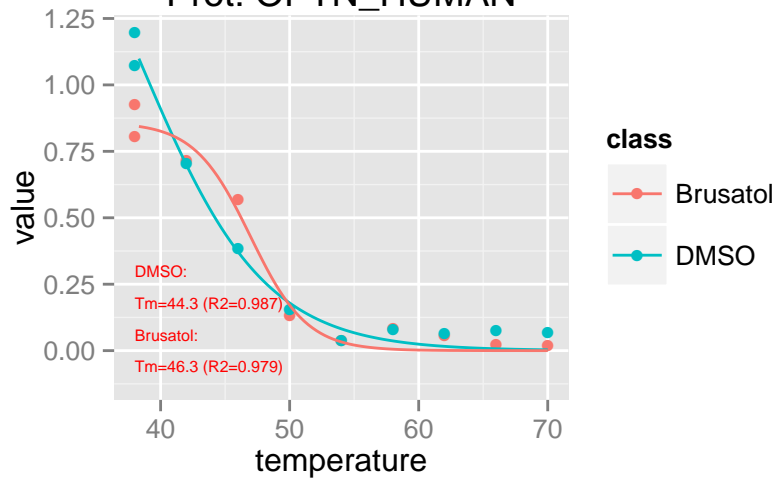

Prot: ORC4\_HUMAN

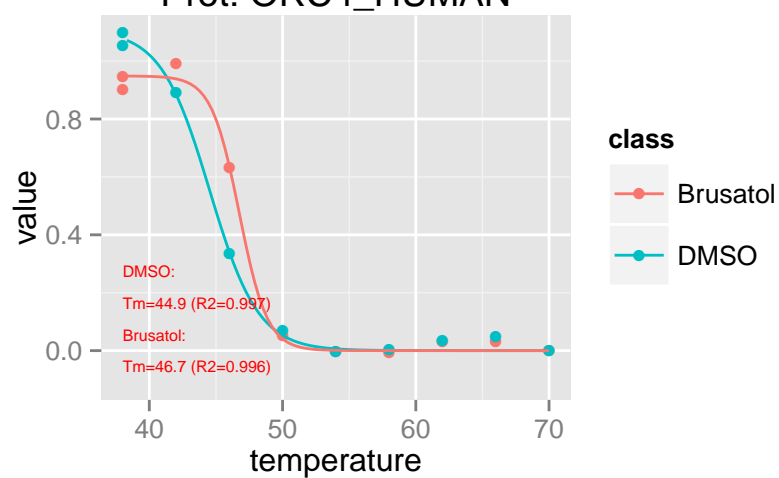

Prot: ORC5\_HUMAN

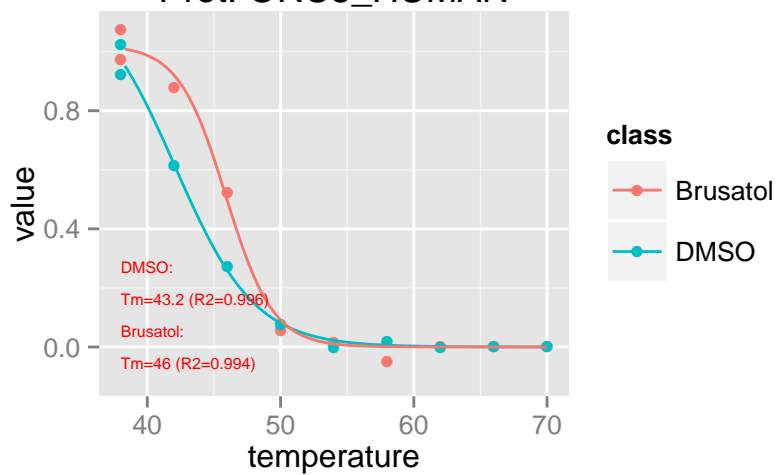

Prot: ORN\_HUMAN

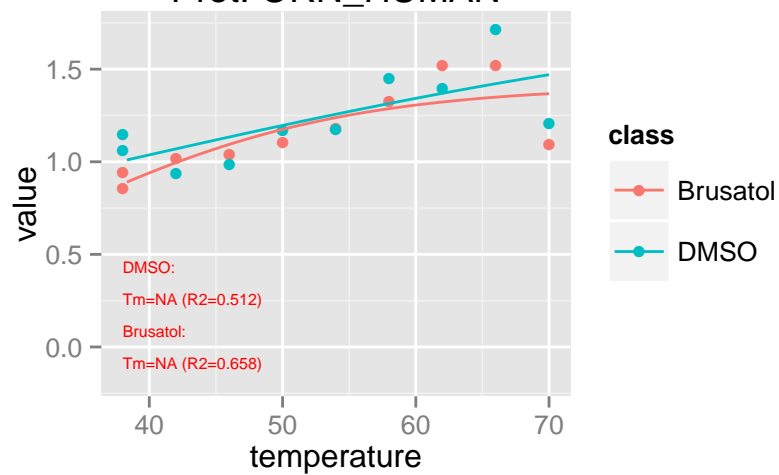

Prot: OSB10\_HUMAN

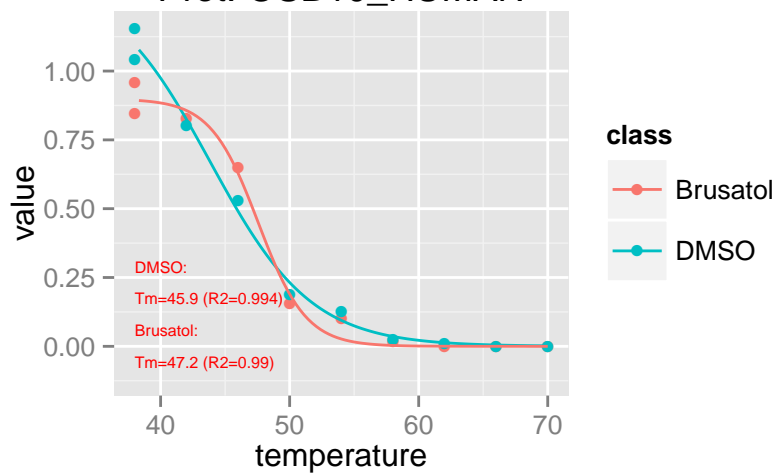

Prot: OSB11\_HUMAN

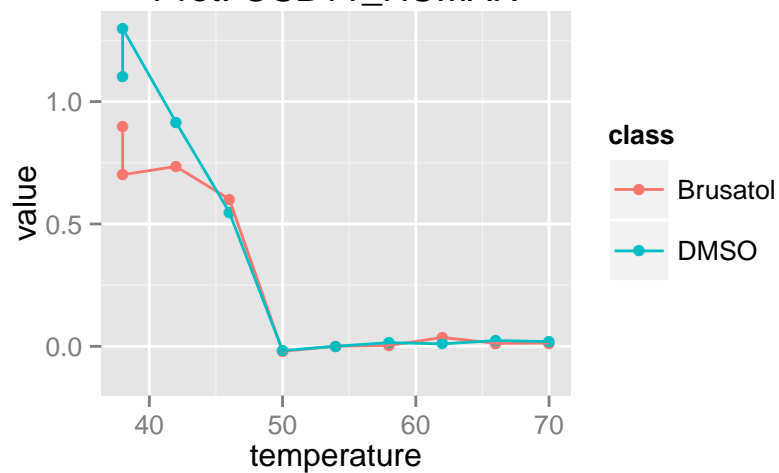

Prot: OSBL9\_HUMAN

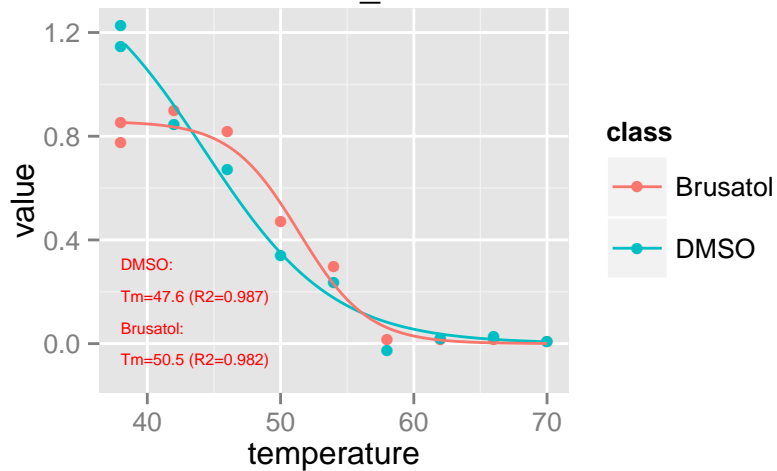

Prot: OSBP1\_HUMAN

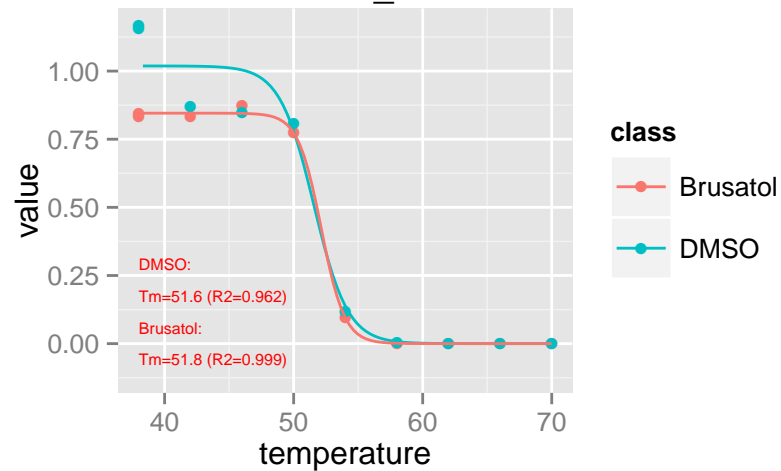

Prot: OSGEP\_HUMAN

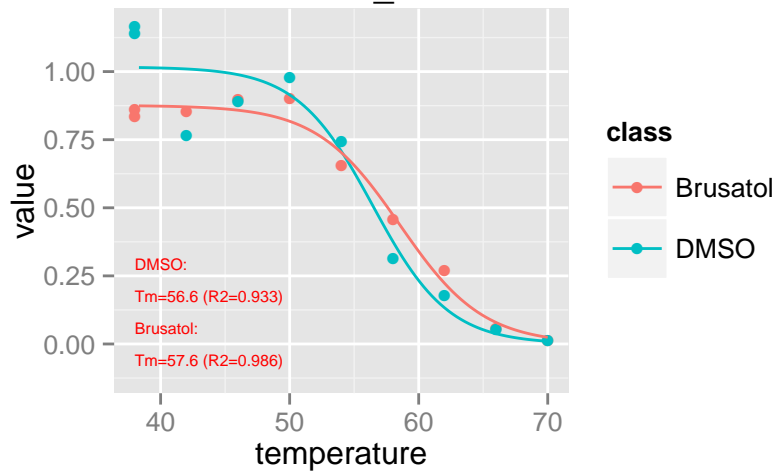

Prot: OSTF1\_HUMAN

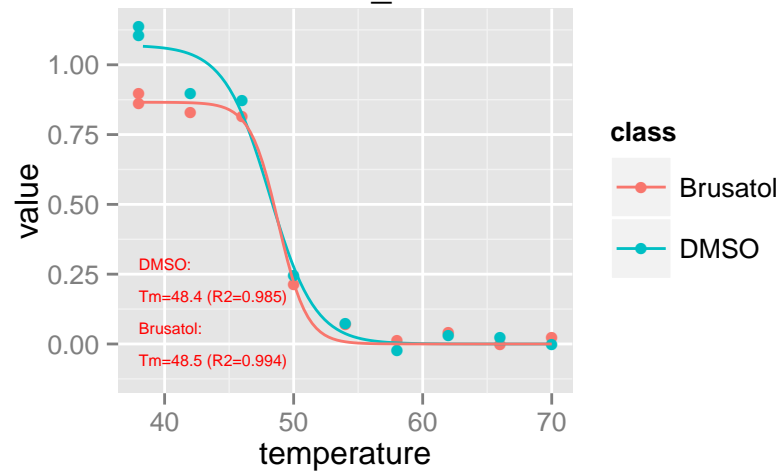

Prot: OTU6B\_HUMAN

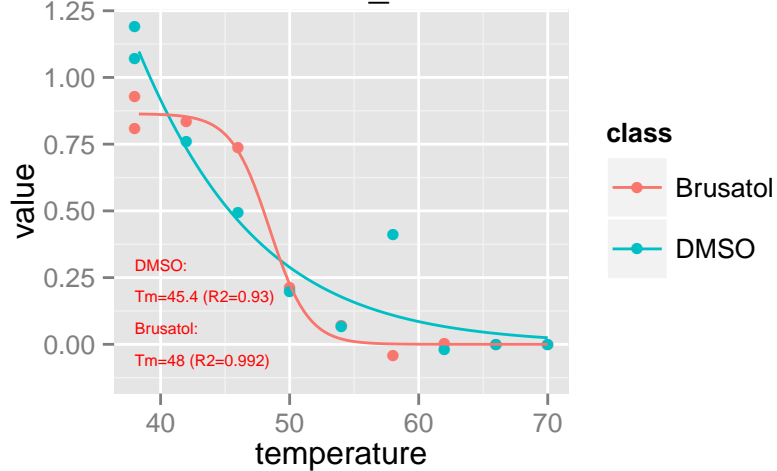

Prot: OTU7B\_HUMAN

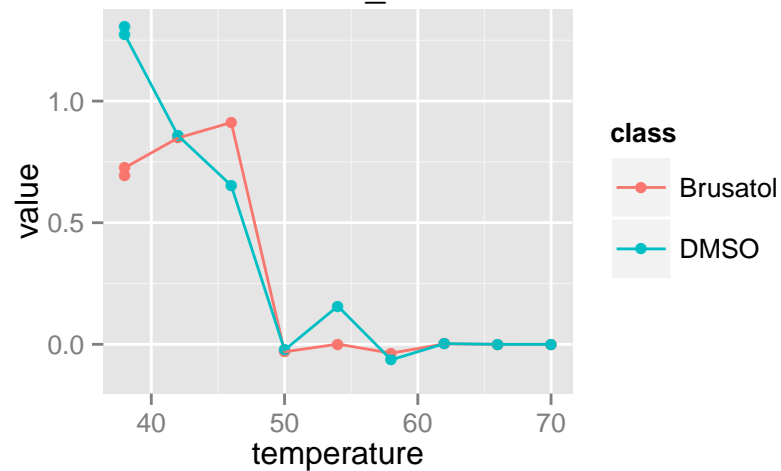

Prot: OTUB1\_HUMAN

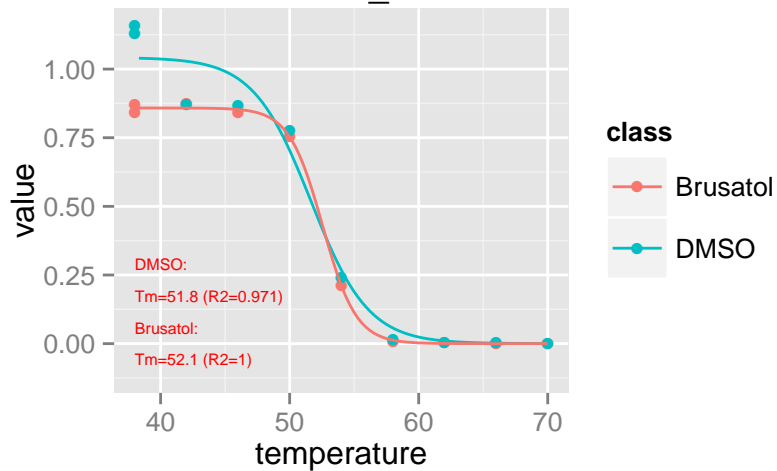

Prot: OVCA2\_HUMAN

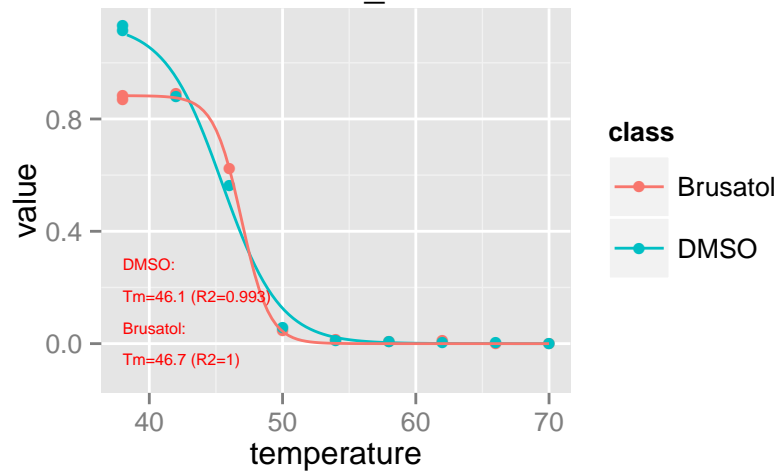

Prot: OXR1\_HUMAN

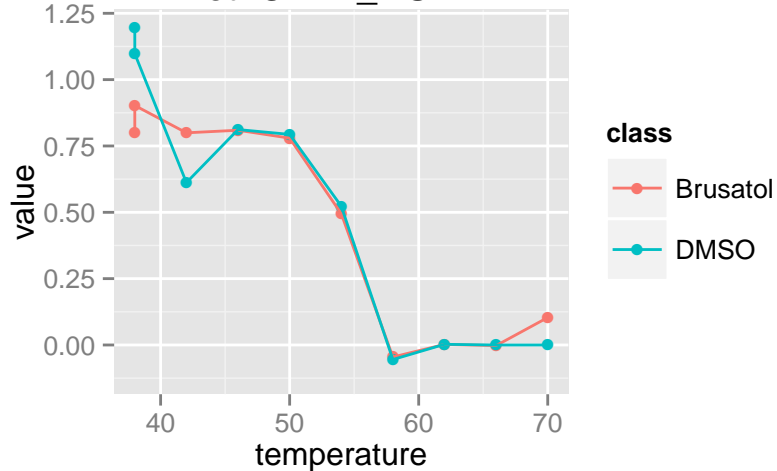

Prot: OXSM\_HUMAN

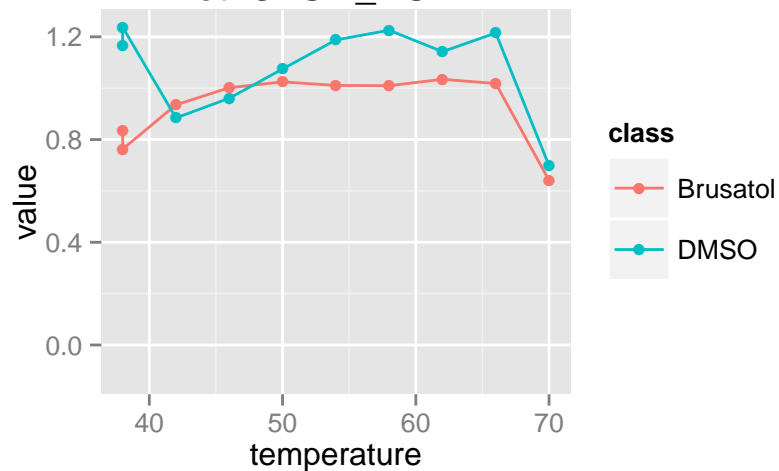

Prot: OXSR1\_HUMAN

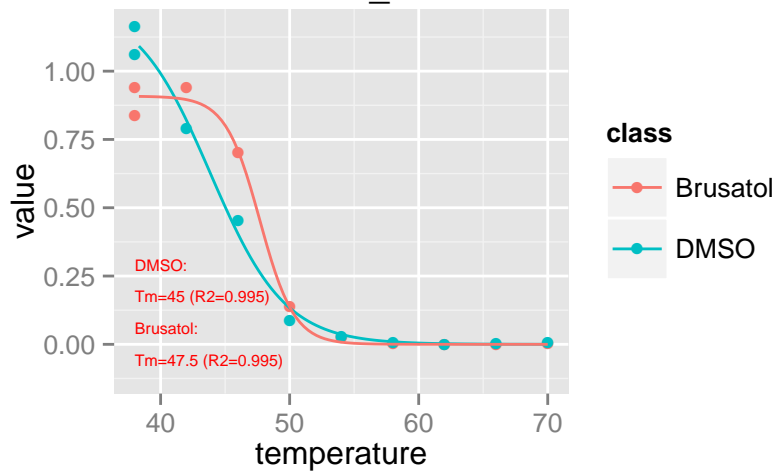

Prot: P20D2\_HUMAN

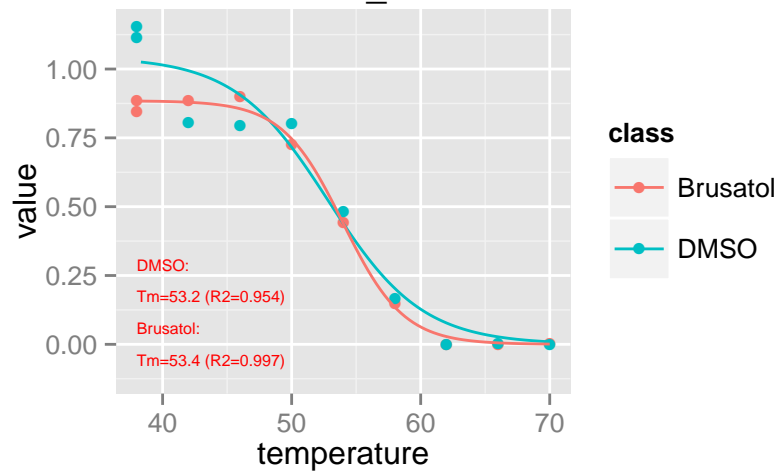

Prot: P3H1\_HUMAN

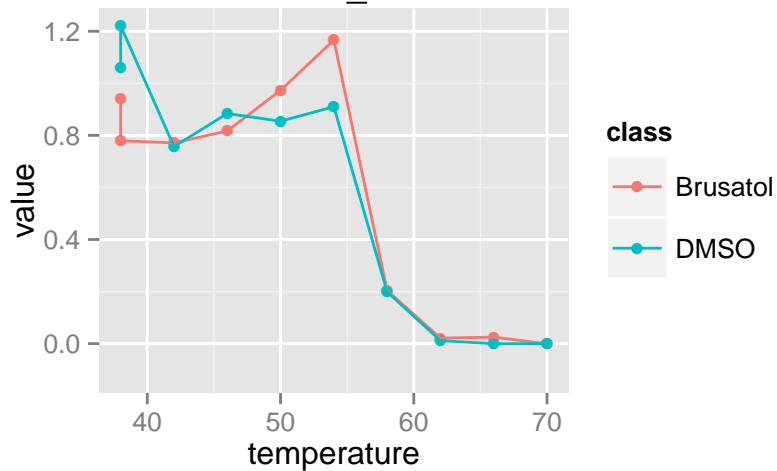

Prot: P4HA1\_HUMAN

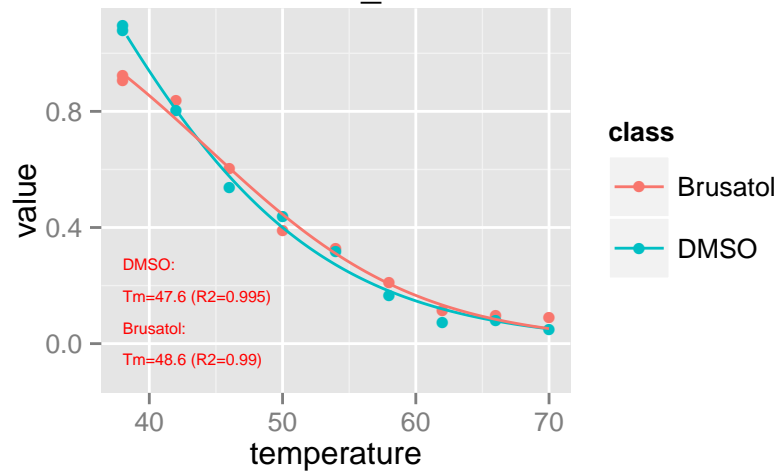

Prot: P4HA2\_HUMAN

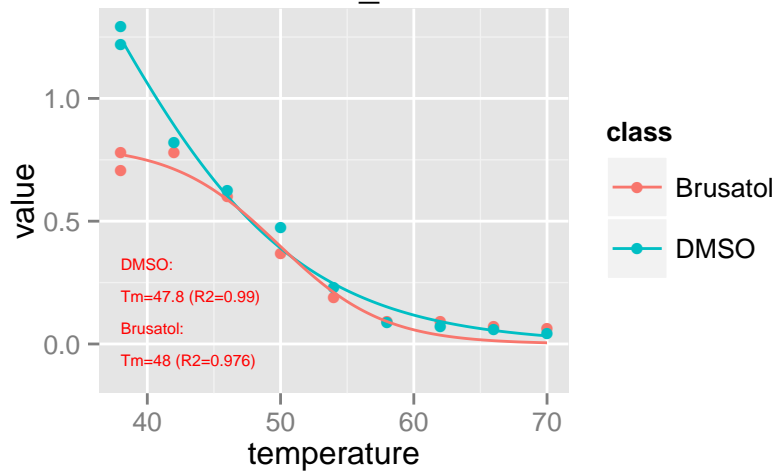

Prot: P4R3A\_HUMAN

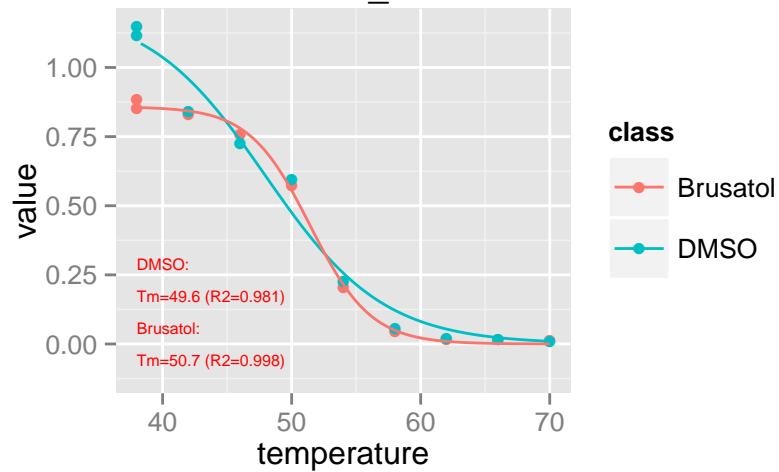

Prot: P4R3B\_HUMAN

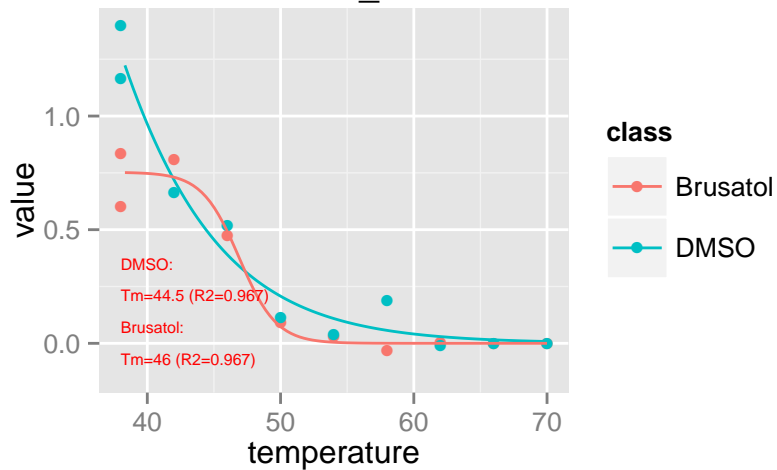

Prot: P5CR1\_HUMAN

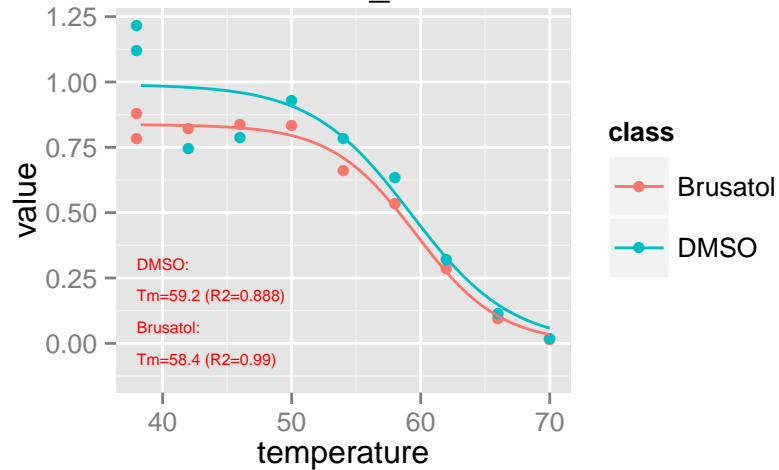

Prot: P5CR2\_HUMAN

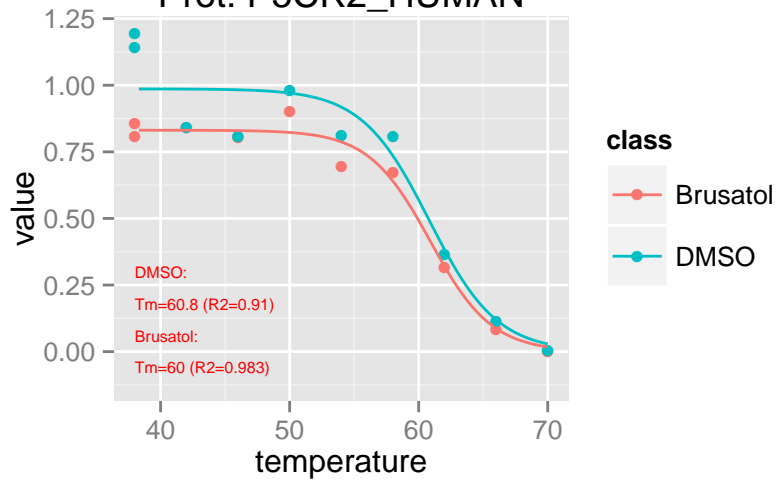

Prot: P5CR3\_HUMAN

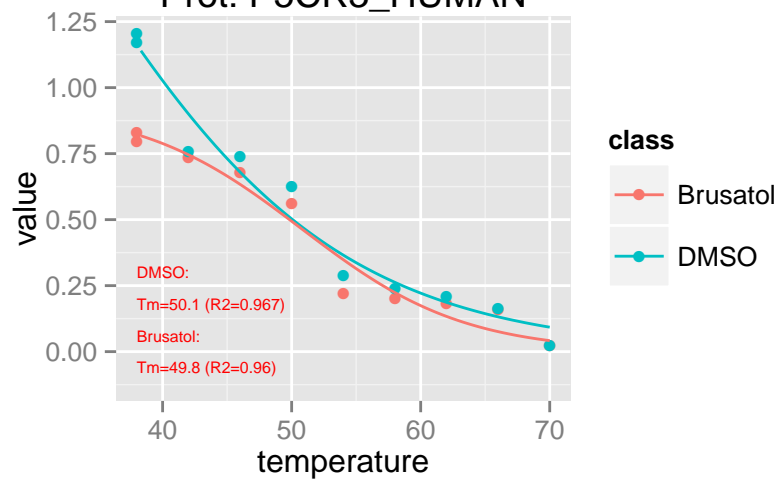

Prot: P5CS\_HUMAN

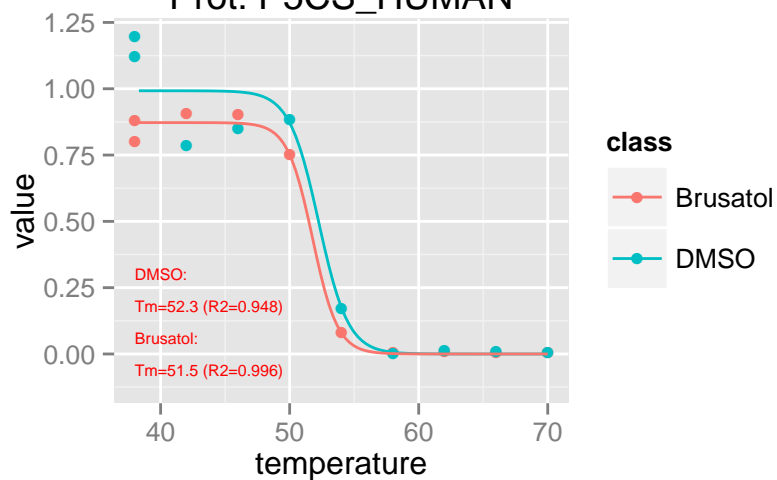

Prot: P66A\_HUMAN

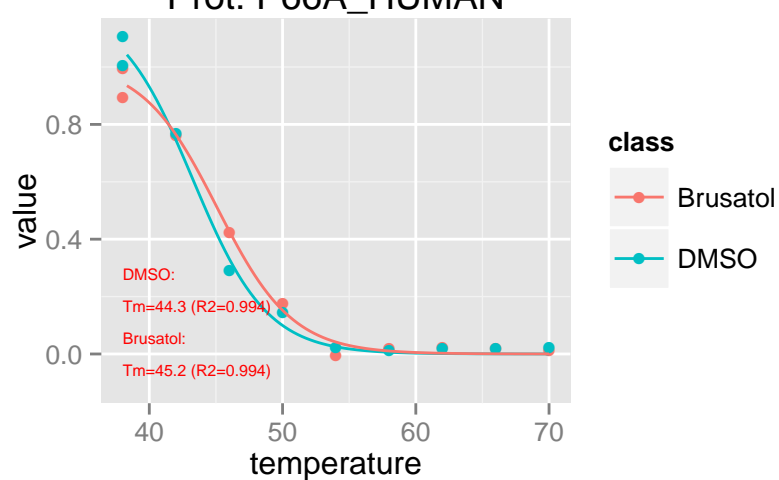

Prot: PA1B2\_HUMAN

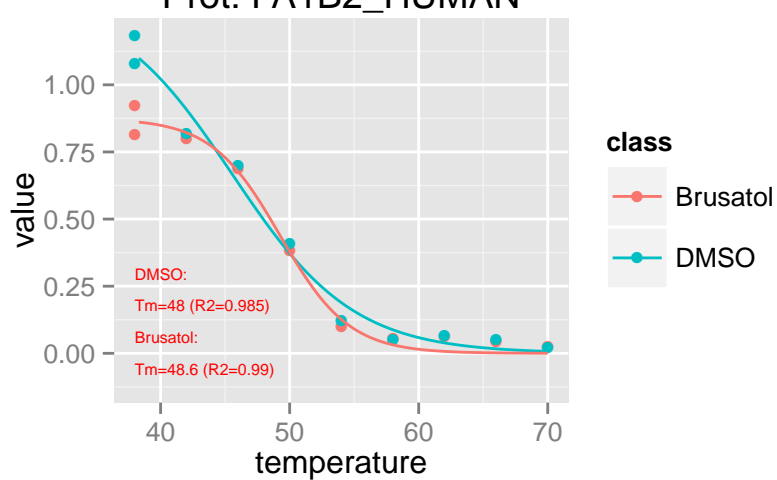

Prot: PA1B3\_HUMAN

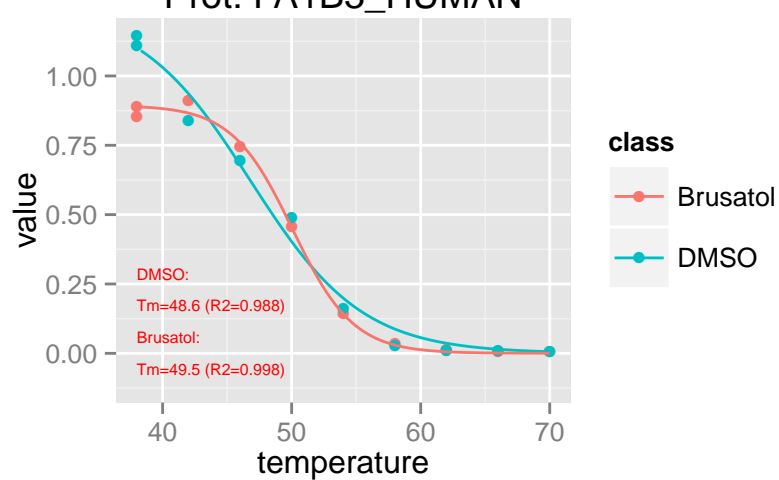

Prot: PA24A\_HUMAN

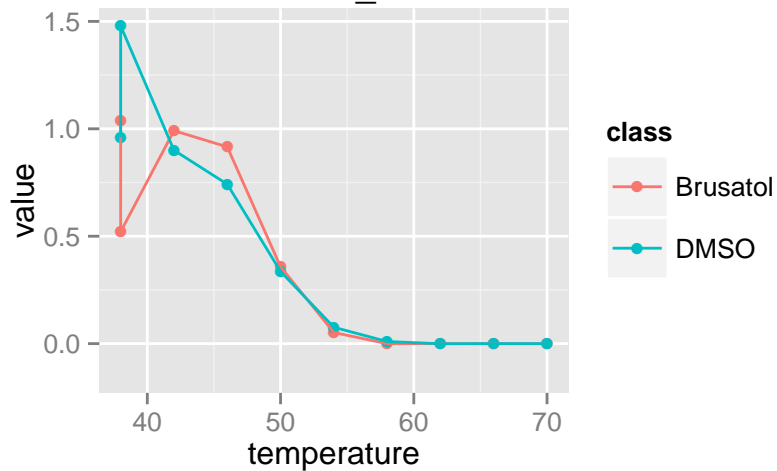

Prot: PA24G4\_HUMAN

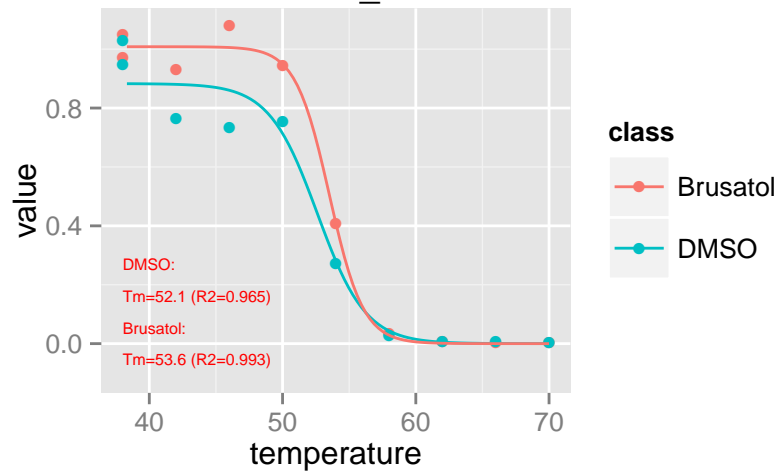

Prot: PAAF1\_HUMAN

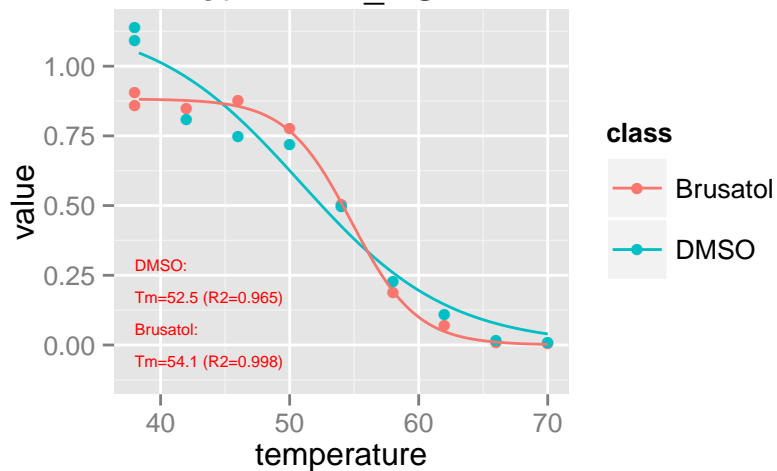

Prot: PABP1\_HUMAN

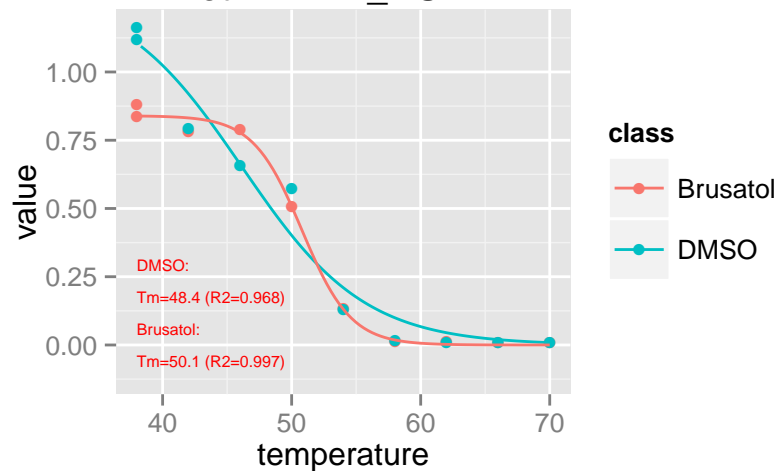

Prot: PABP2\_HUMAN

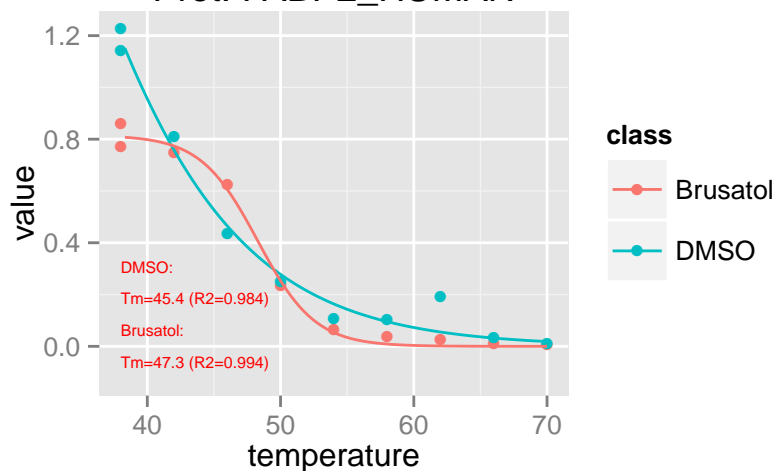

Prot: PABP4\_HUMAN

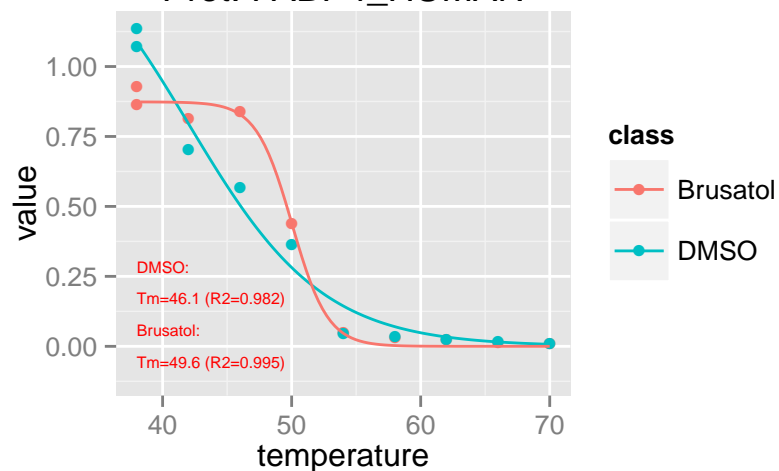

Prot: PACN2\_HUMAN

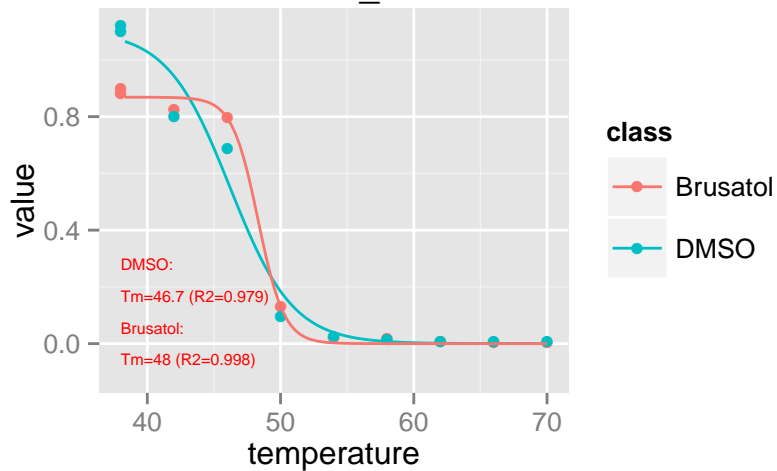

Prot: PACS1\_HUMAN

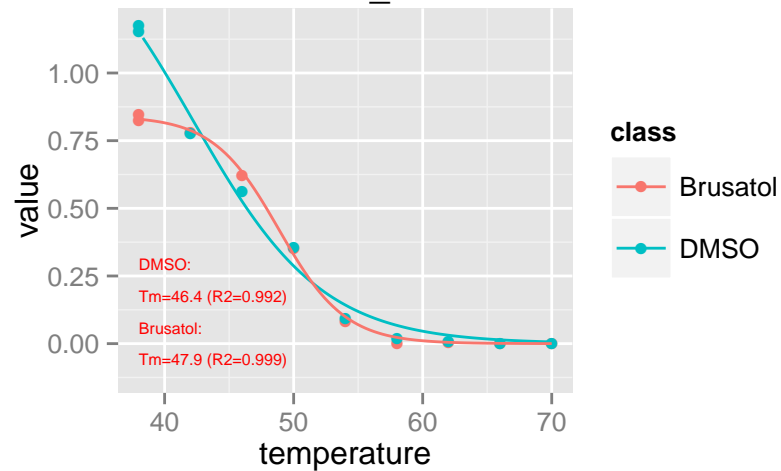

Prot: PAF\_HUMAN

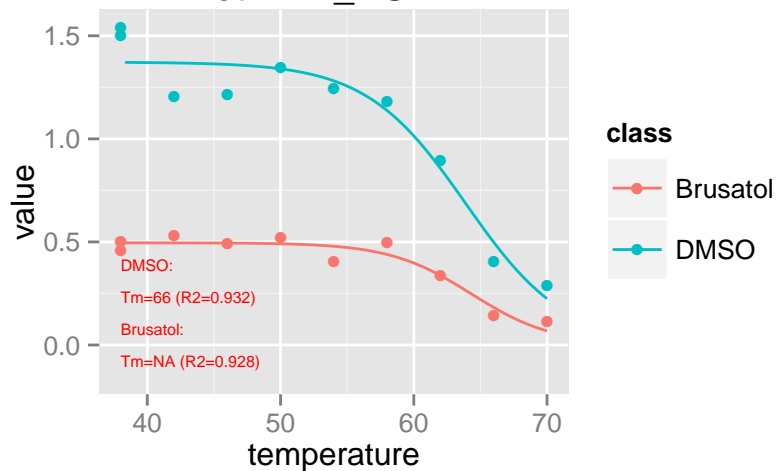

Prot: PAF1\_HUMAN

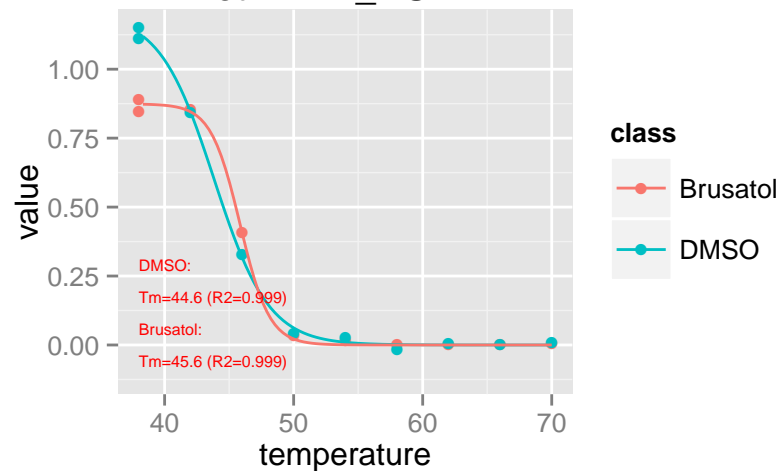

Prot: PAIP1\_HUMAN

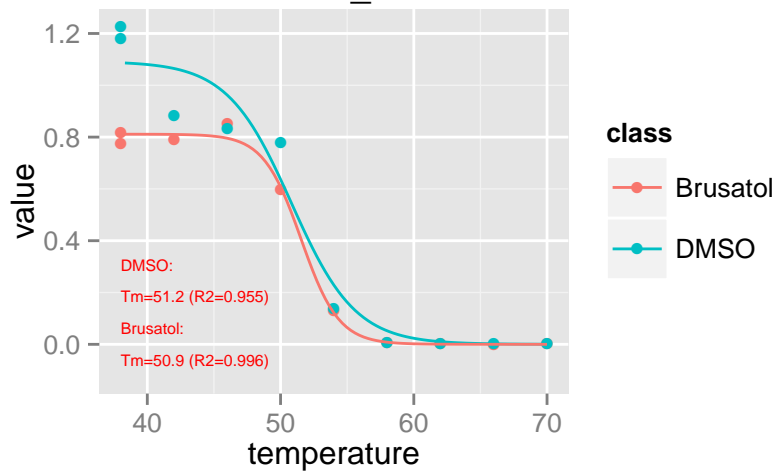

Prot: PAIRB\_HUMAN

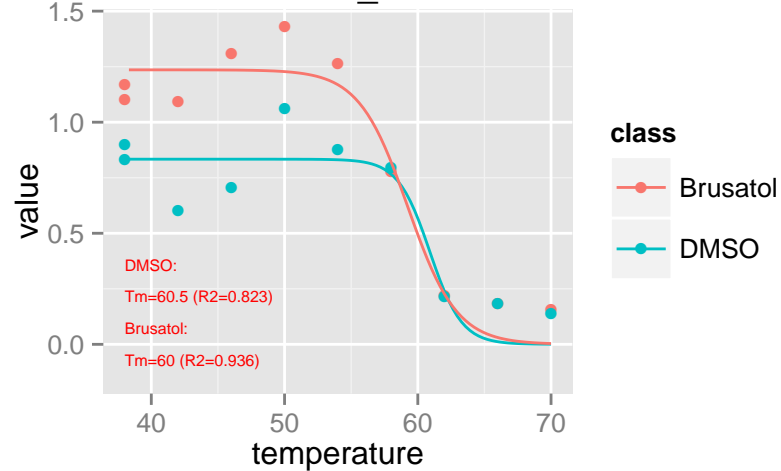



Prot: PAK1\_HUMAN

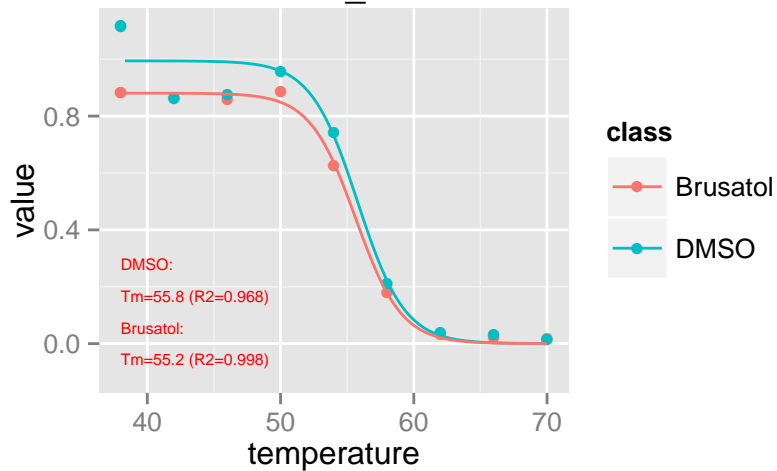

Prot: PAK2\_HUMAN

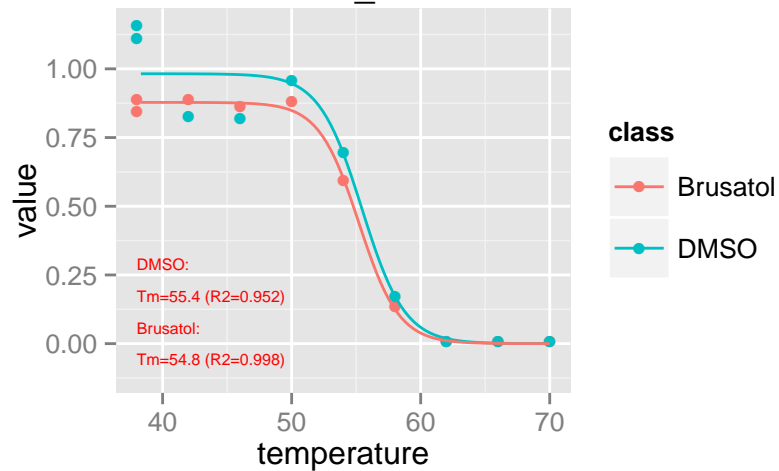

Prot: PAK4\_HUMAN

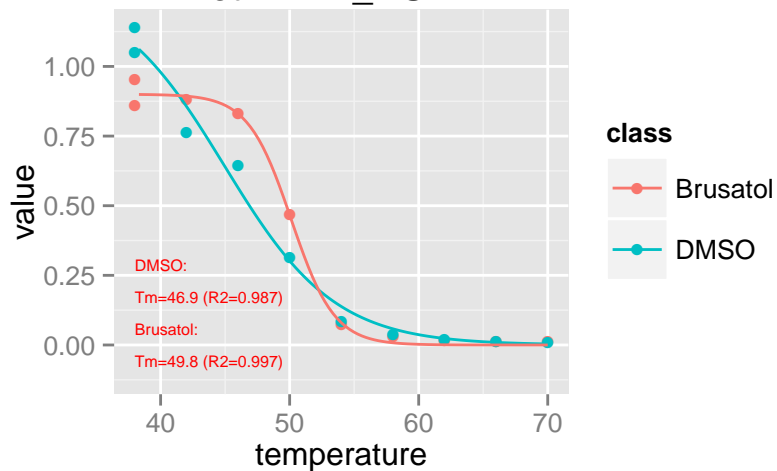

Prot: PAL4A\_HUMAN

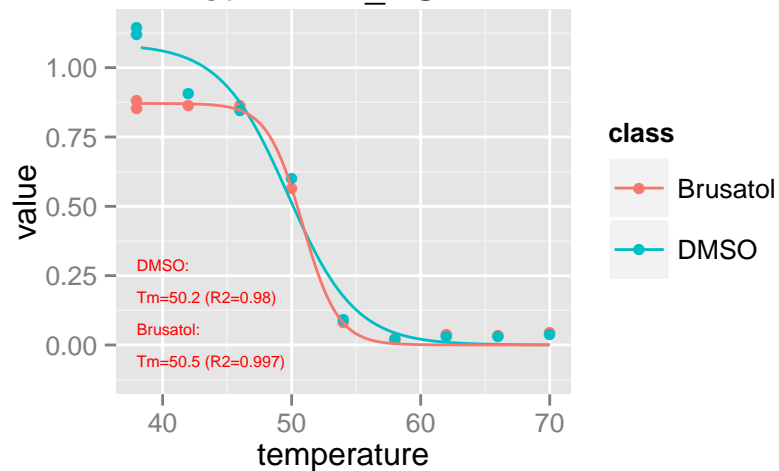

Prot: PALLD\_HUMAN

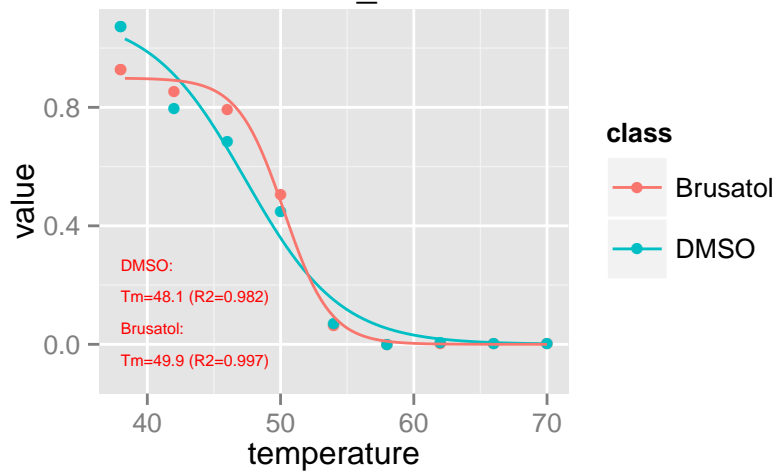

Prot: PANK1\_HUMAN

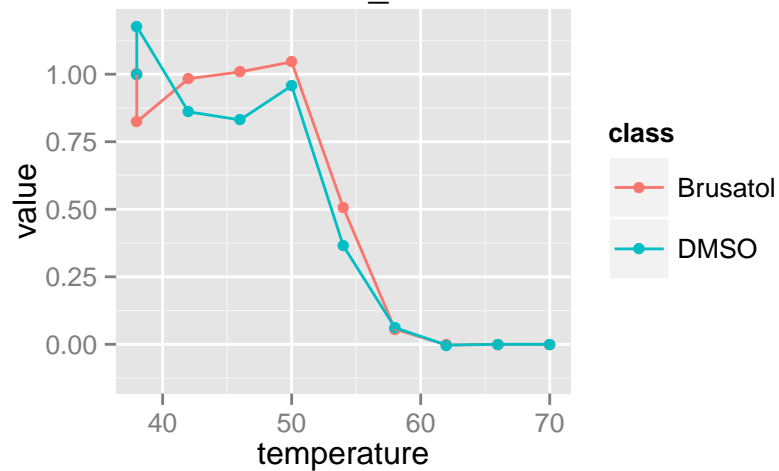

Prot: PANK4\_HUMAN

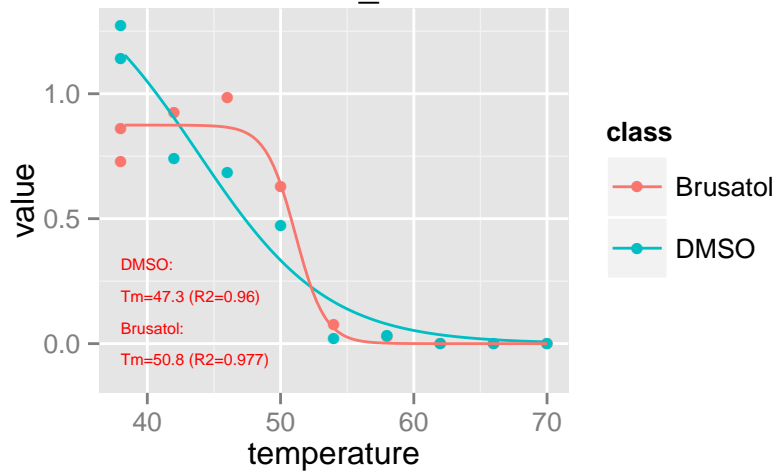

Prot: PAPOA\_HUMAN

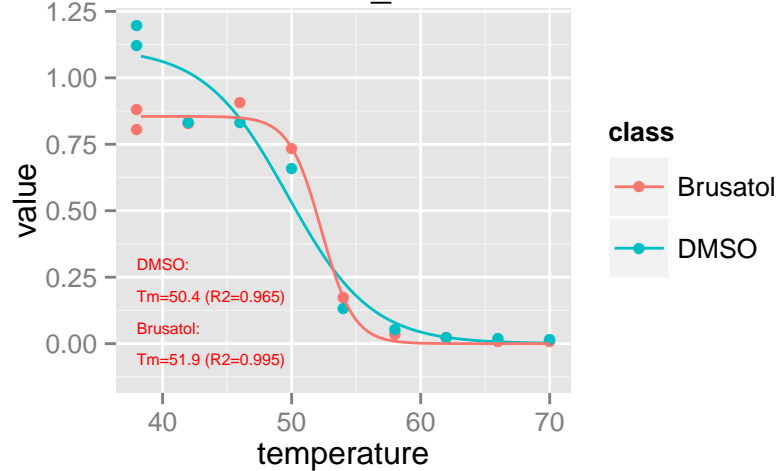

Prot: PAPS1\_HUMAN

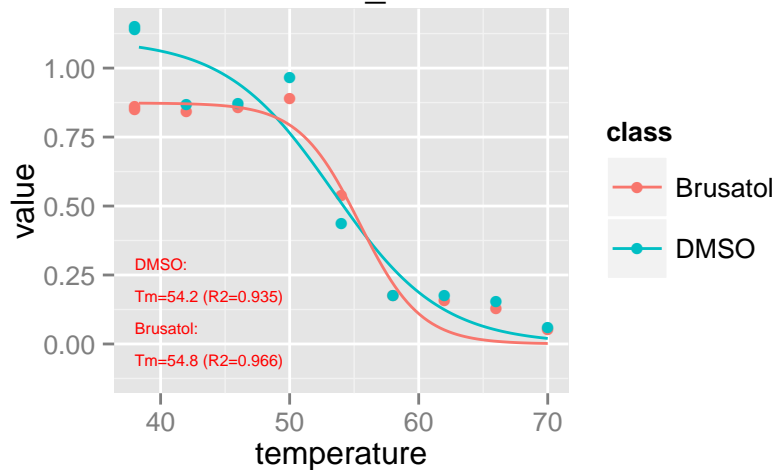

Prot: PAPS2\_HUMAN

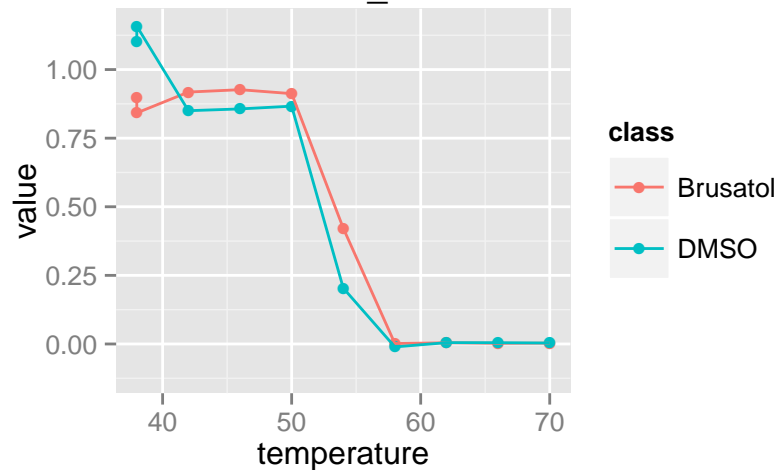

Prot: PARD3\_HUMAN

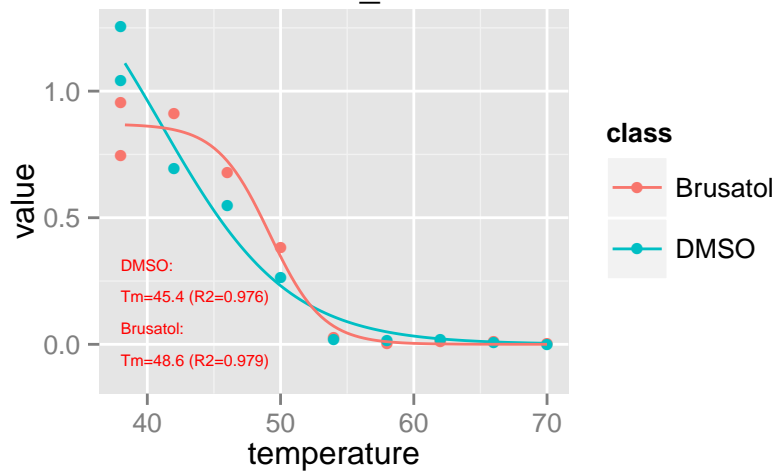

Prot: PARF\_HUMAN

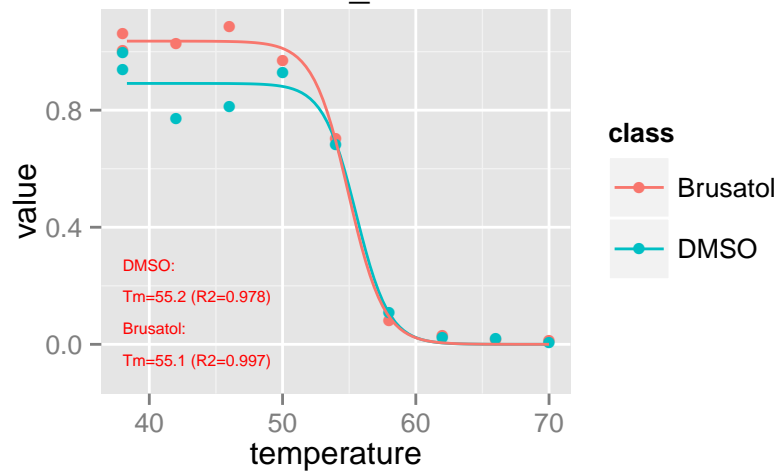

Prot: PARG\_HUMAN

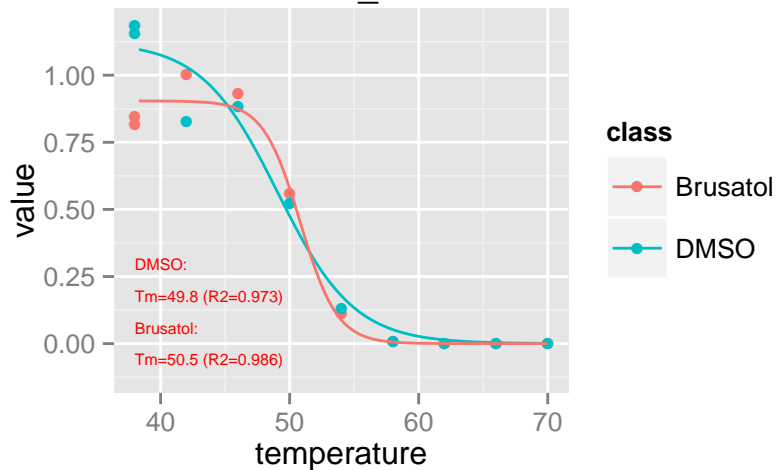

Prot: PARK7\_HUMAN

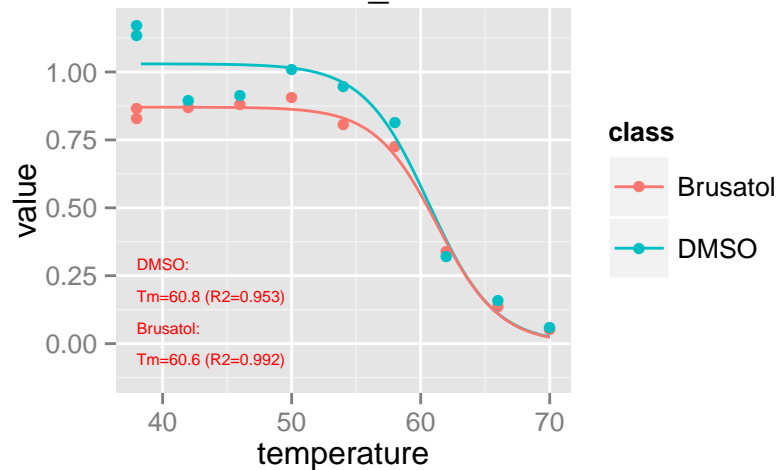

Prot: PARN\_HUMAN

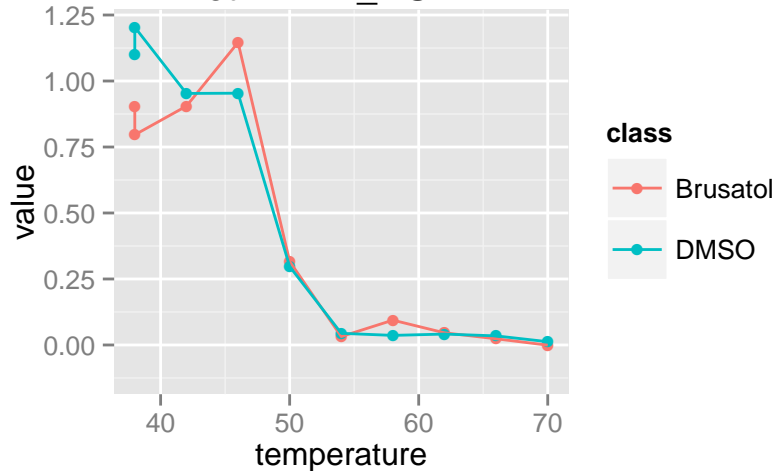

Prot: PARP1\_HUMAN

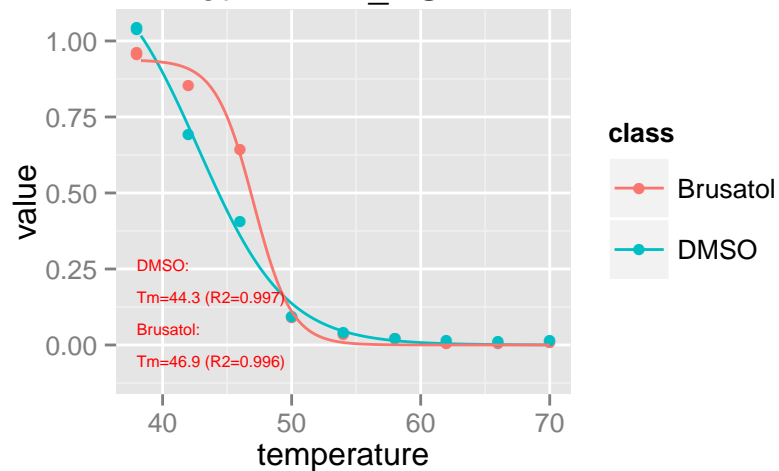

Prot: PARP4\_HUMAN

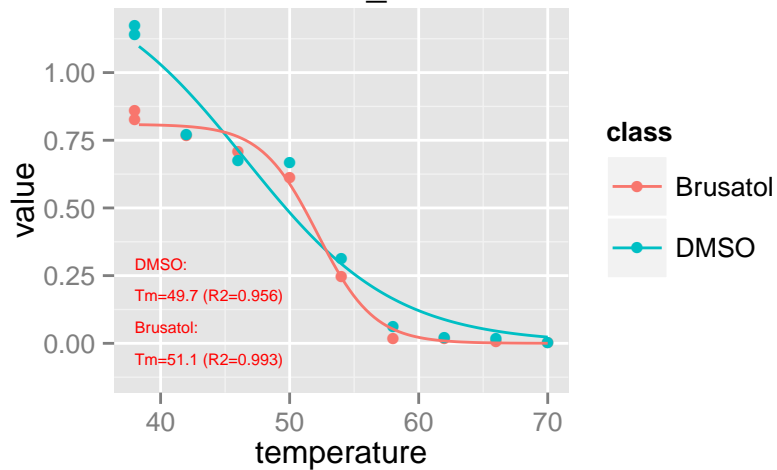

Prot: PARVA\_HUMAN

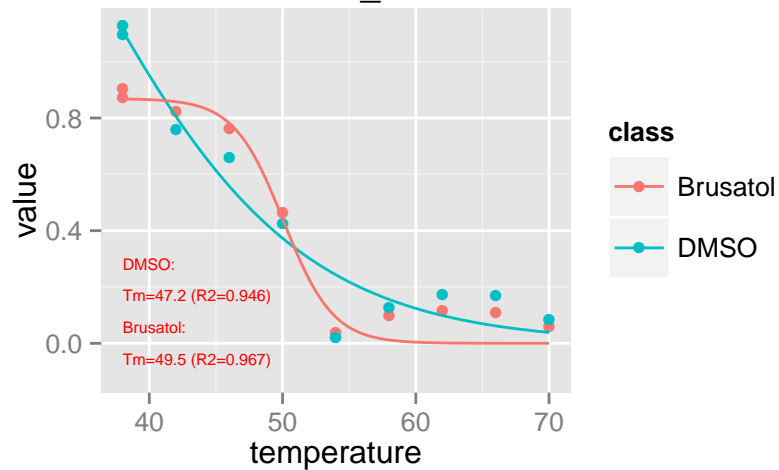

Prot: PATL1\_HUMAN

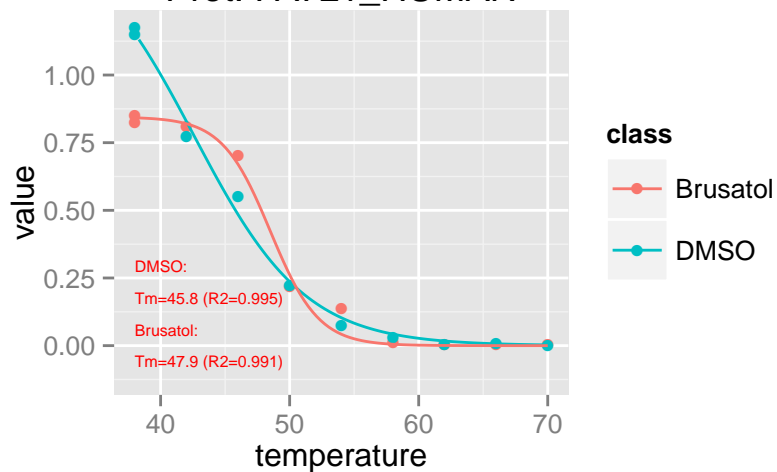

Prot: PAWR\_HUMAN

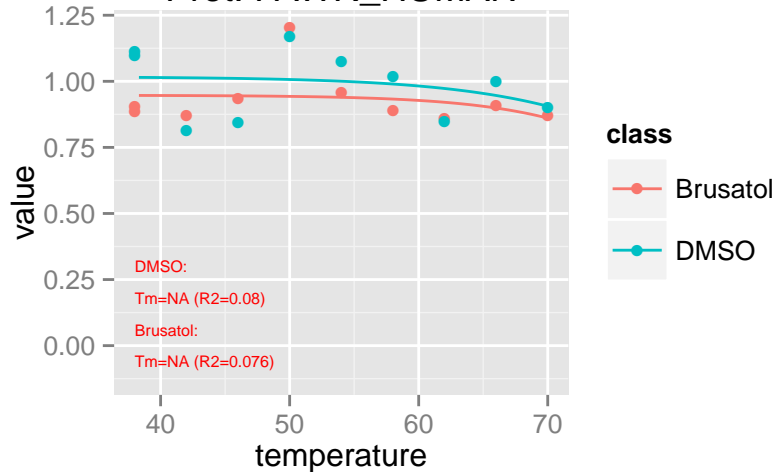

Prot: PAXI\_HUMAN

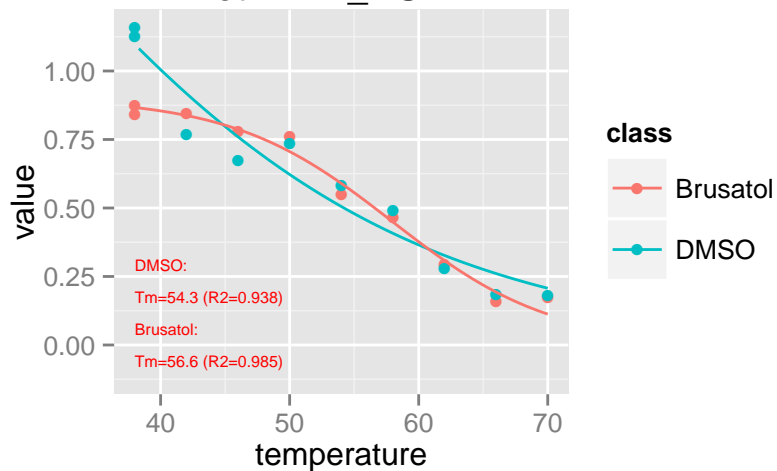

Prot: PCBP1\_HUMAN

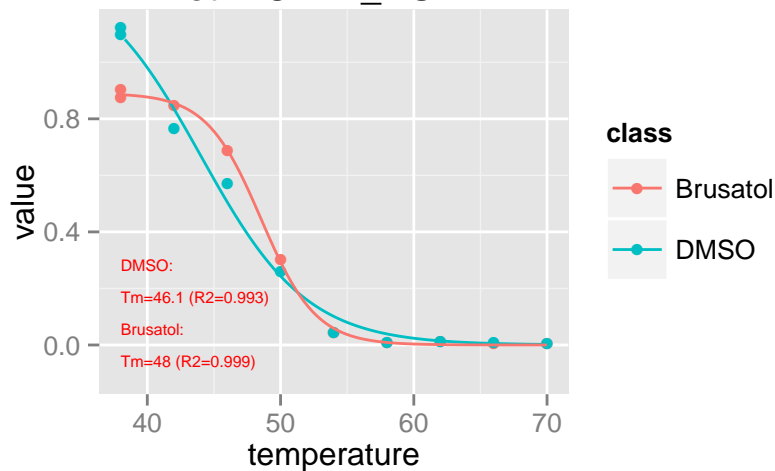

Prot: PCBP2\_HUMAN

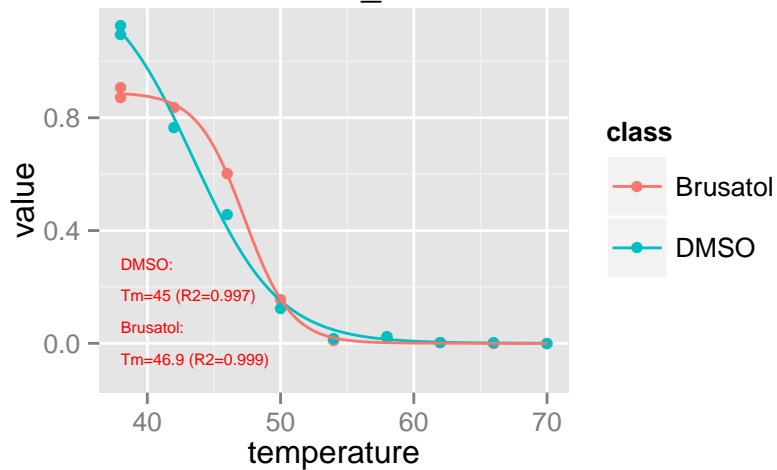

Prot: PCCA\_HUMAN

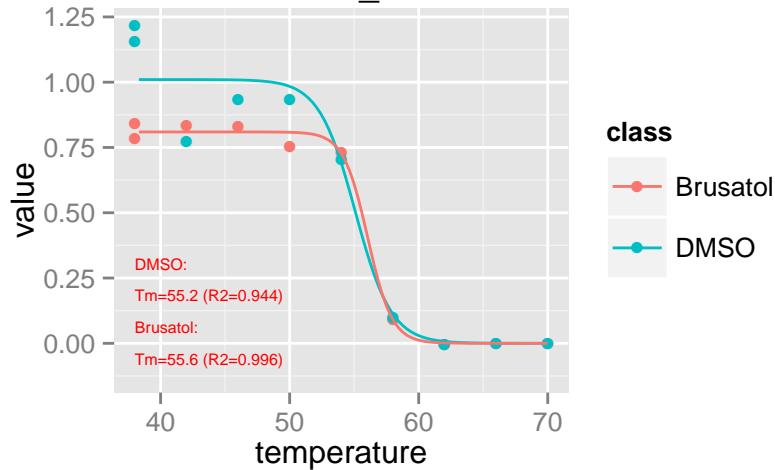

Prot: PCCB\_HUMAN

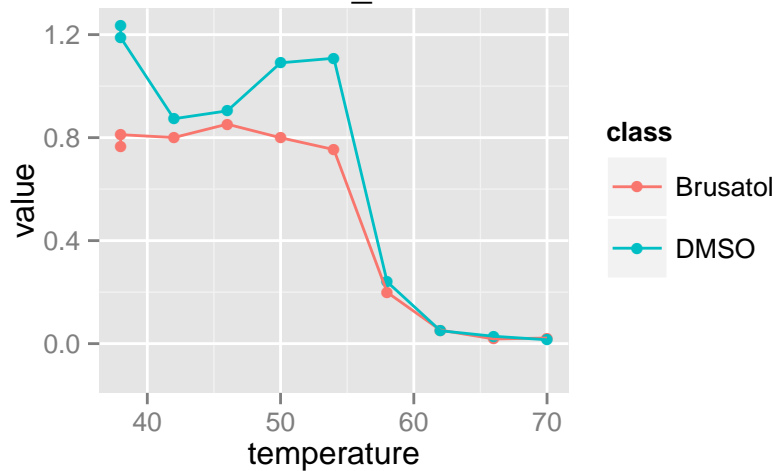

Prot: PCF11\_HUMAN

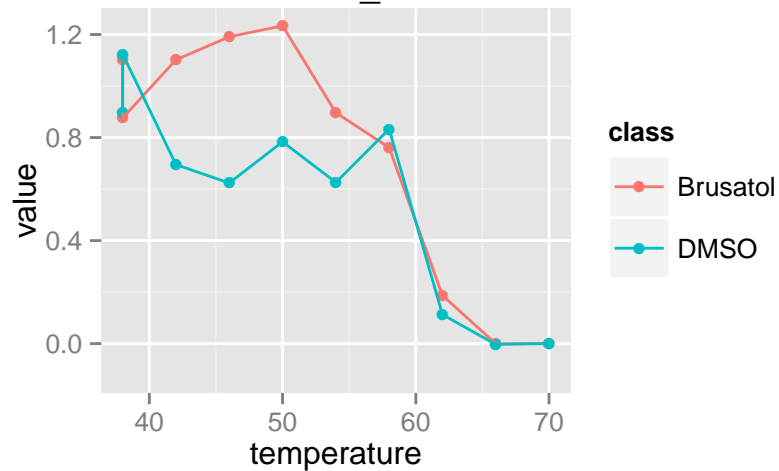

Prot: PCH2\_HUMAN

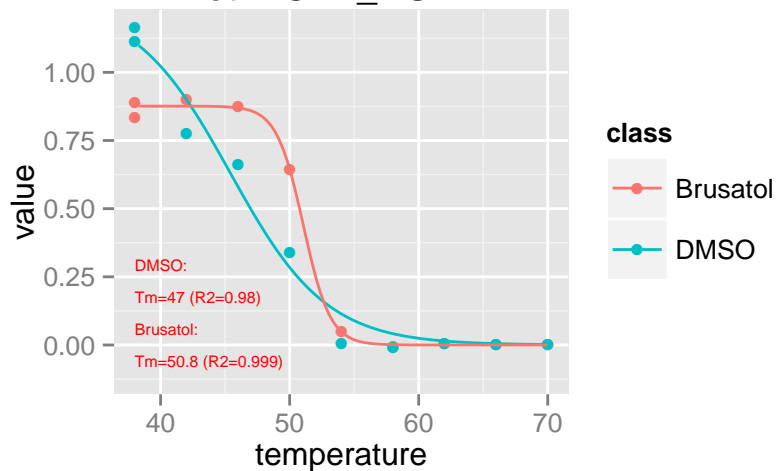

Prot: PCID2\_HUMAN

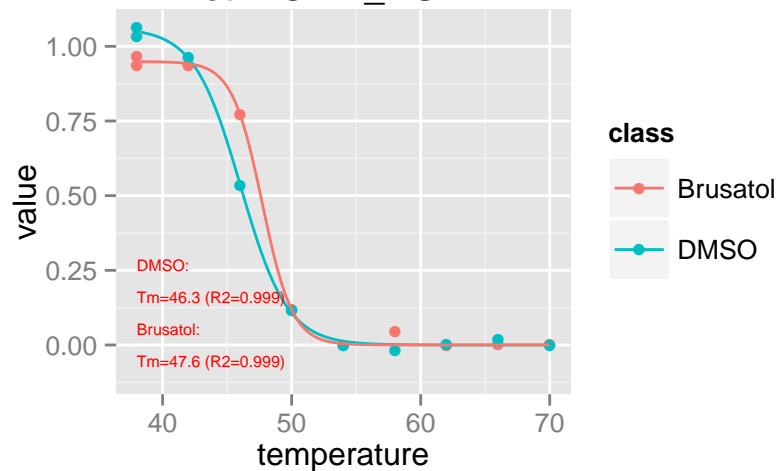

Prot: PCIF1\_HUMAN

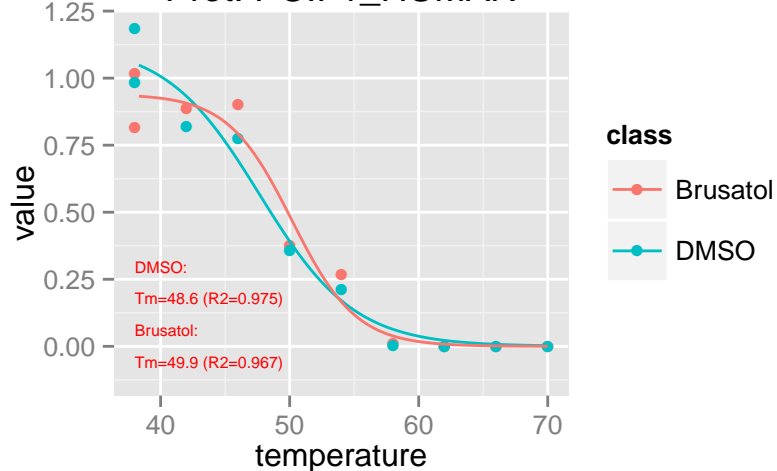

Prot: PCKGC\_HUMAN

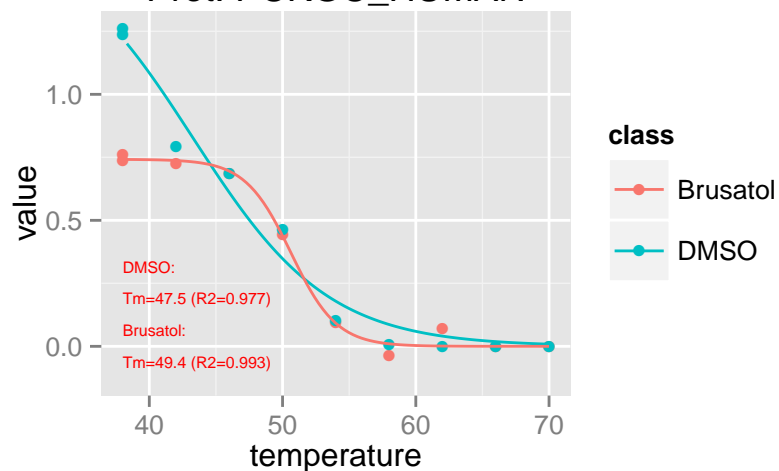

Prot: PCKGM\_HUMAN

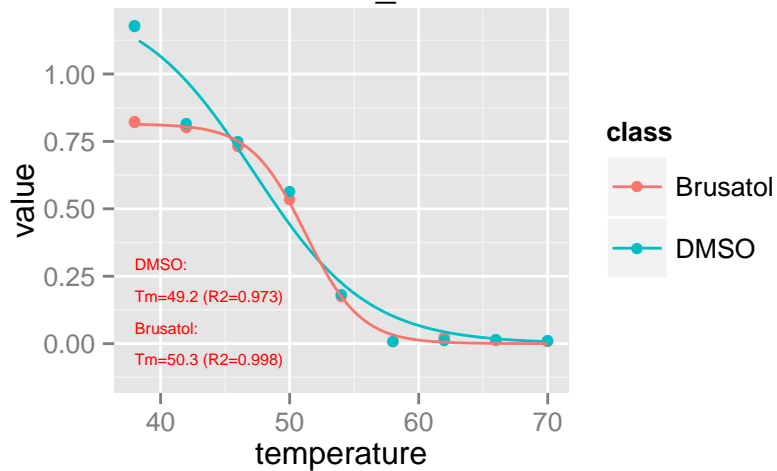

Prot: PCM1\_HUMAN

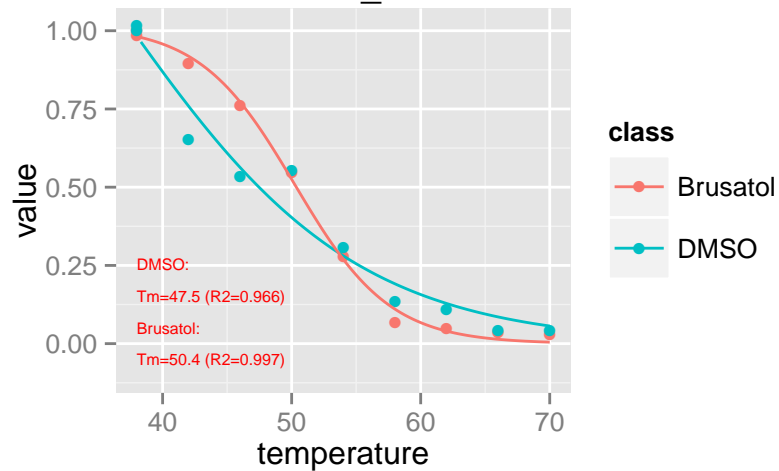

Prot: PCNA\_HUMAN

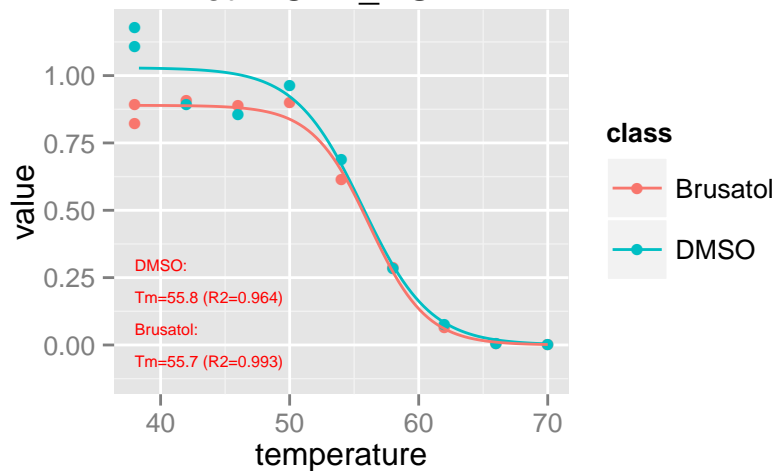

Prot: PCNP\_HUMAN

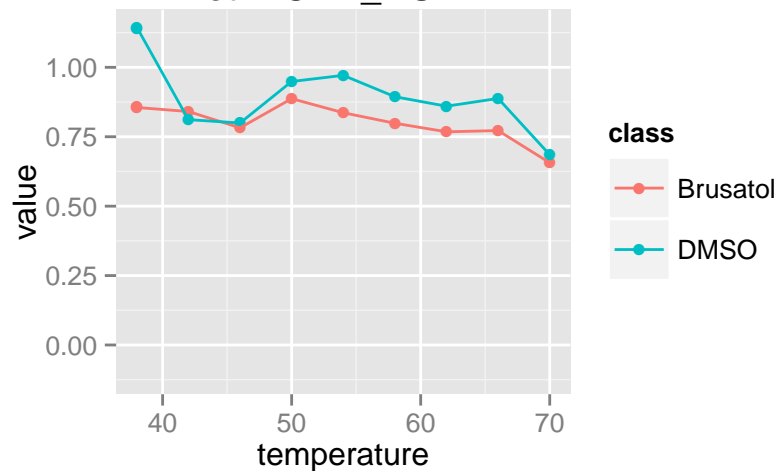

Prot: PCP\_HUMAN

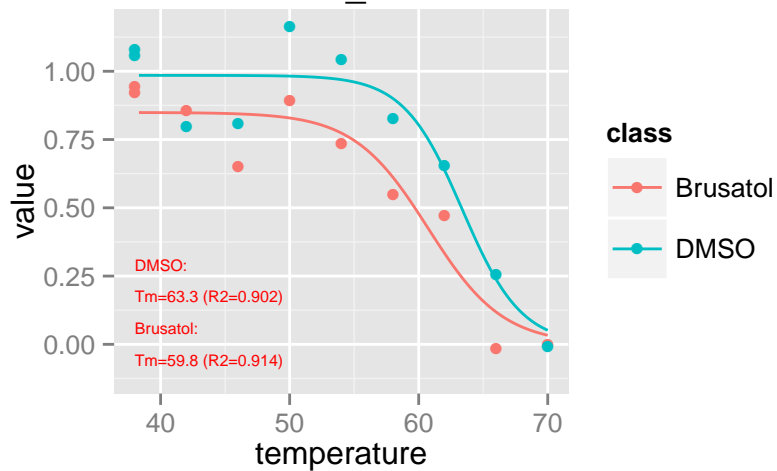

Prot: PCY1A\_HUMAN

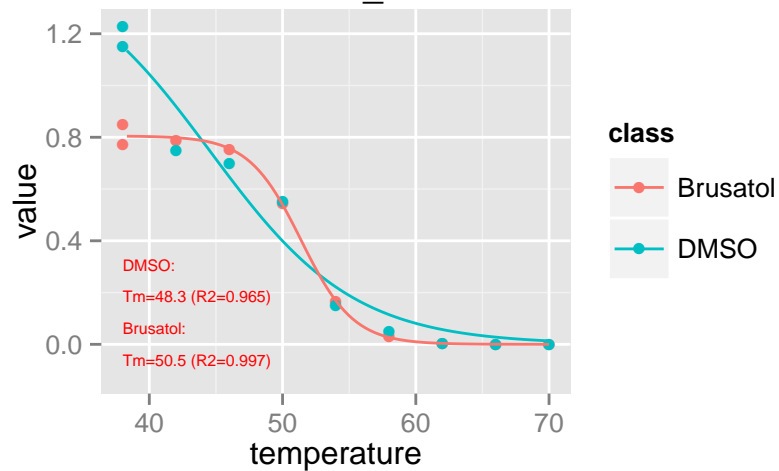

Prot: PCY2\_HUMAN

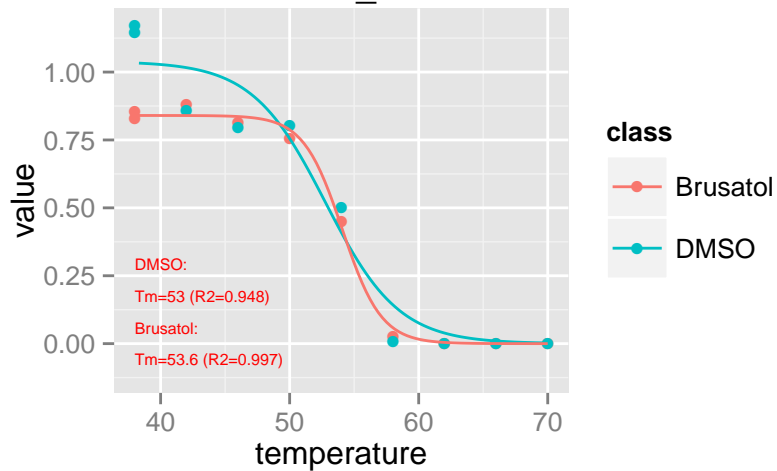

Prot: PCYOX\_HUMAN

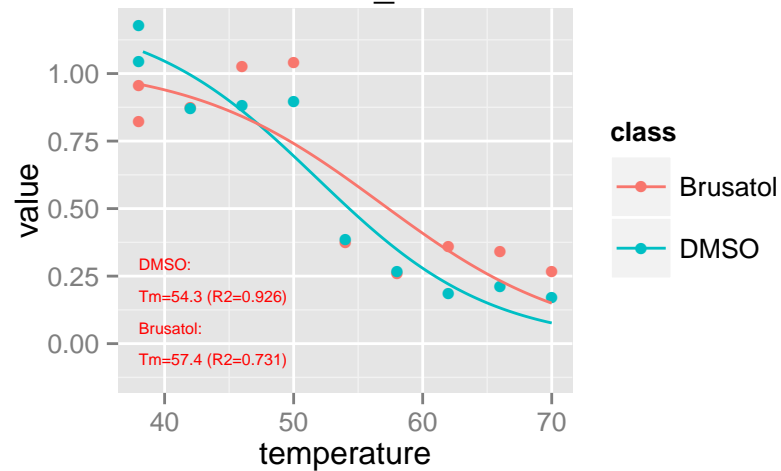

Prot: PDC10\_HUMAN

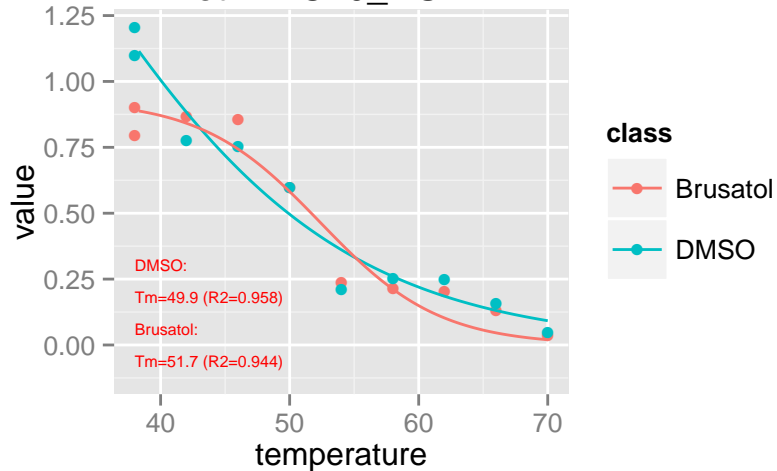

Prot: PDC6I\_HUMAN

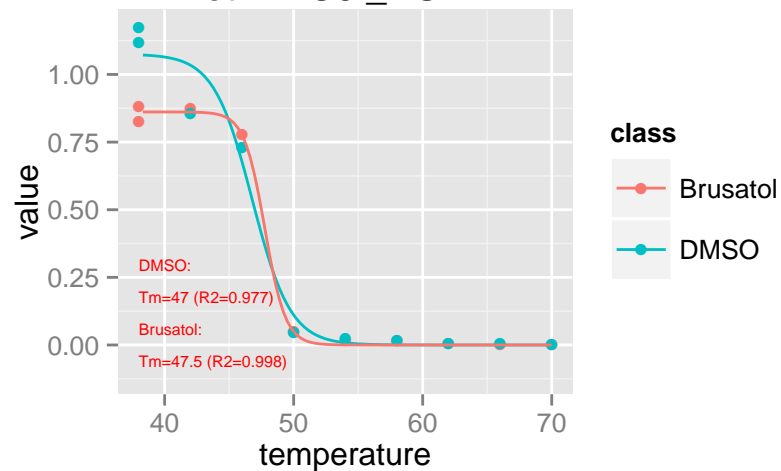

Prot: PDCD5\_HUMAN

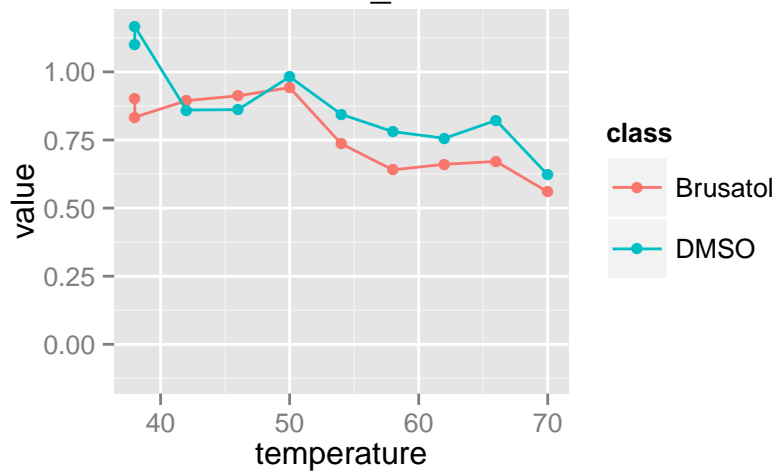

Prot: PDCD6\_HUMAN

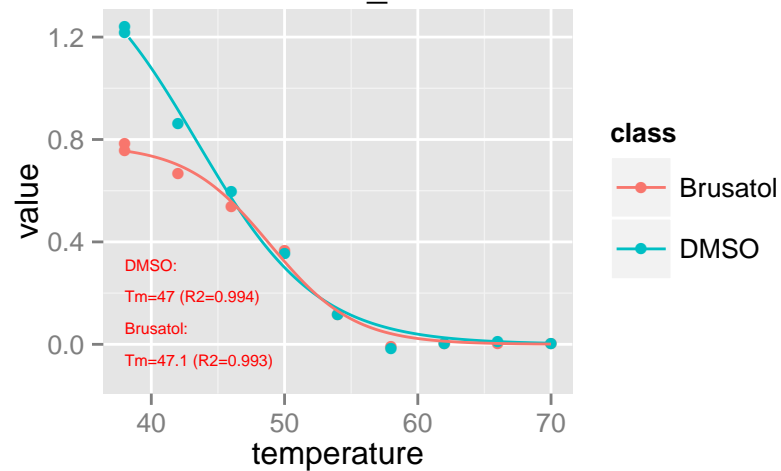

Prot: PDCL3\_HUMAN

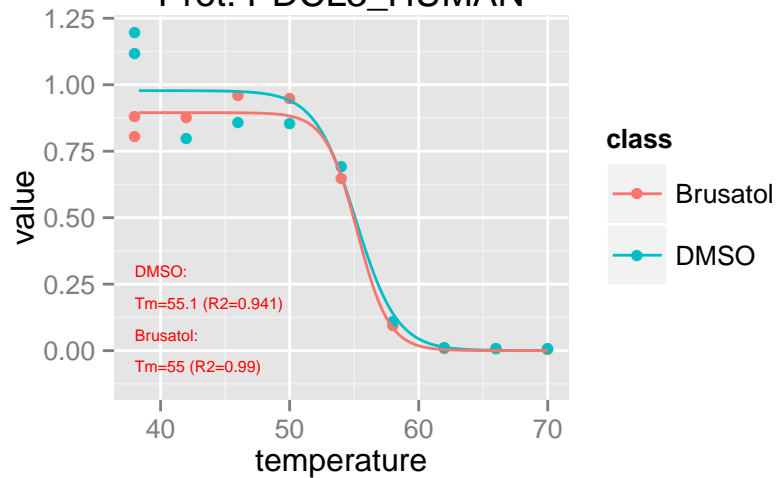

Prot: PDD2L\_HUMAN

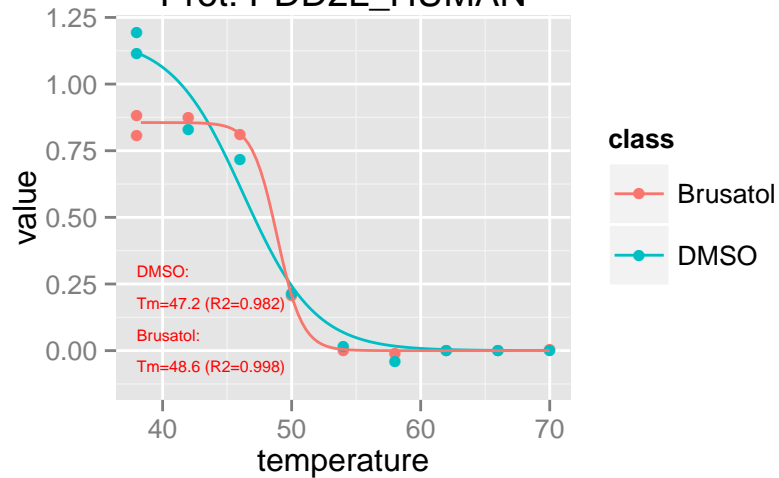

Prot: PDE12\_HUMAN

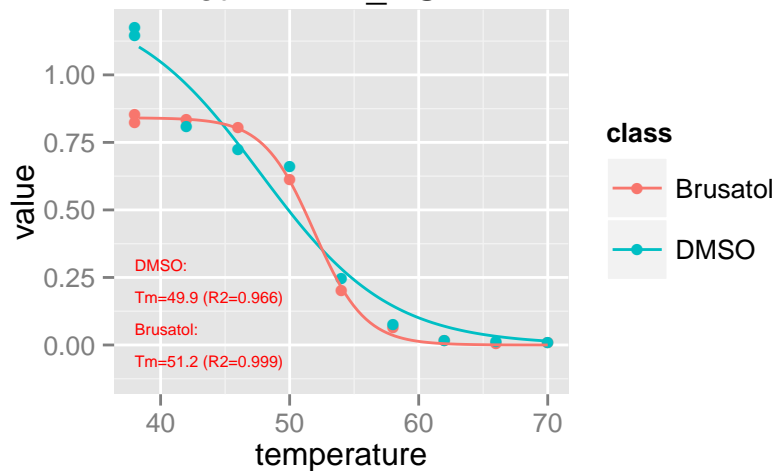

Prot: PDE1C\_HUMAN

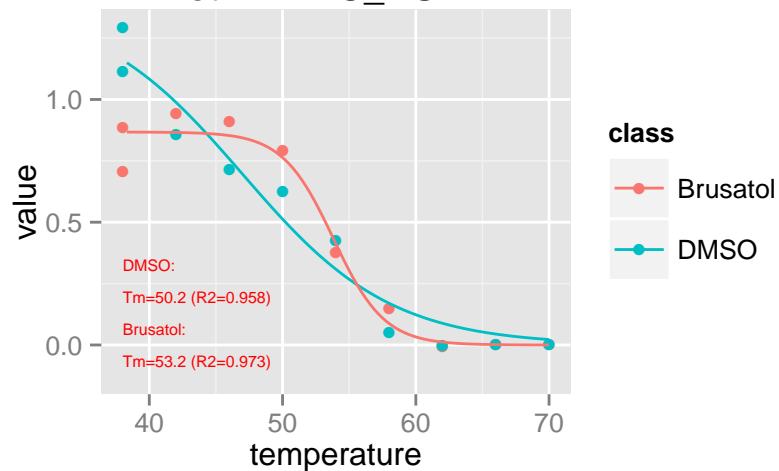

Prot: PDE4D\_HUMAN

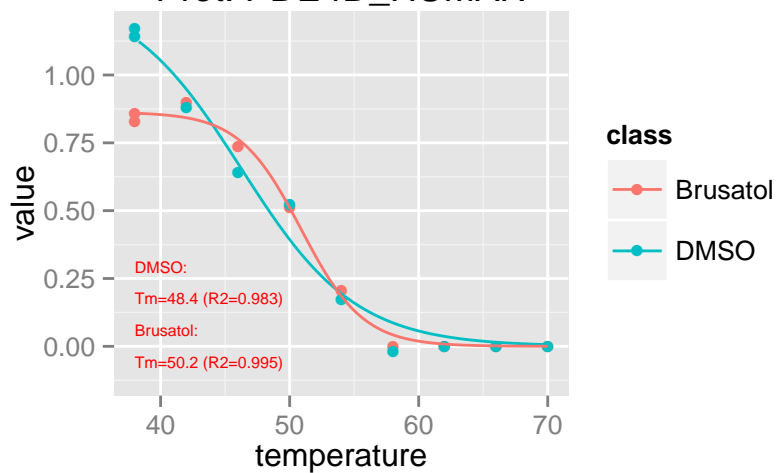

Prot: PDE6D\_HUMAN

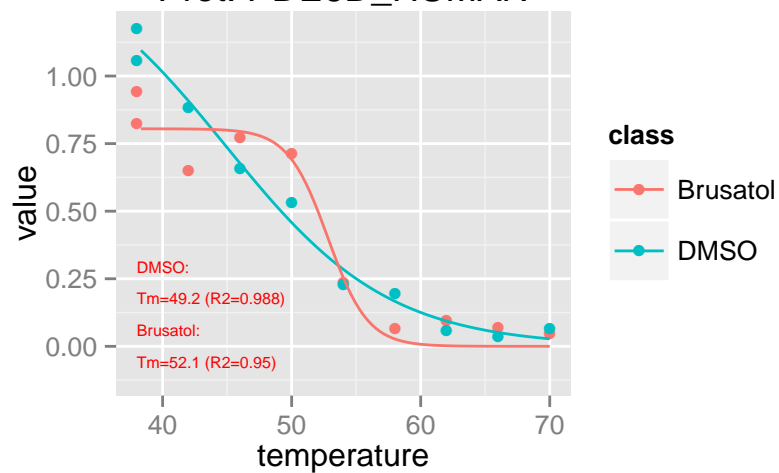



Prot: PDIA1\_HUMAN

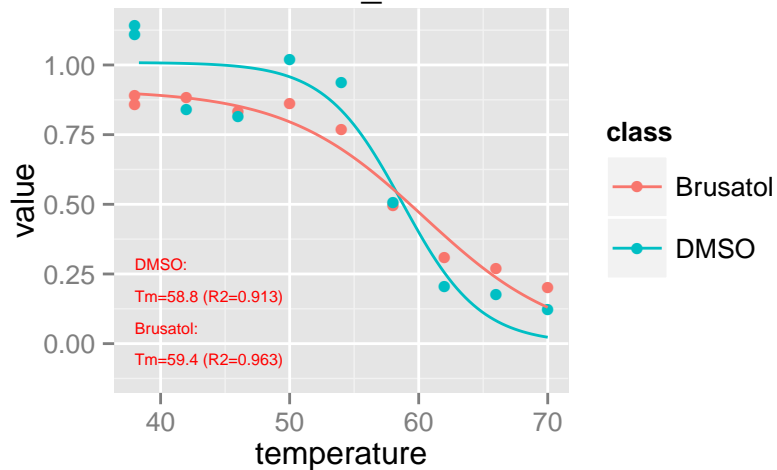

Prot: PDIA3\_HUMAN

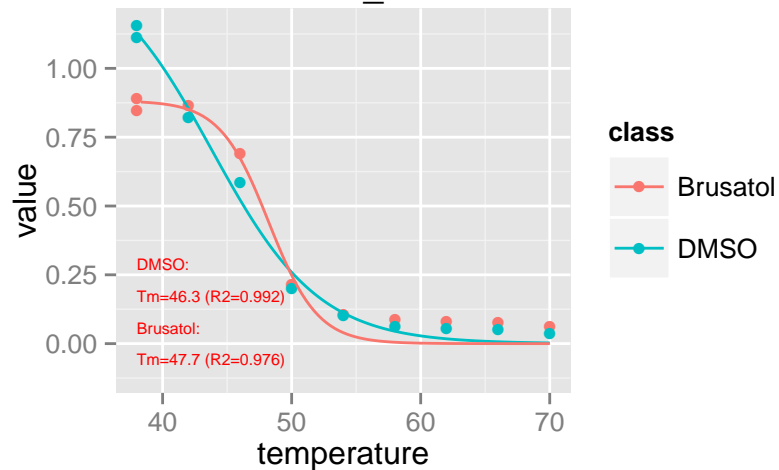

Prot: PDIA4\_HUMAN

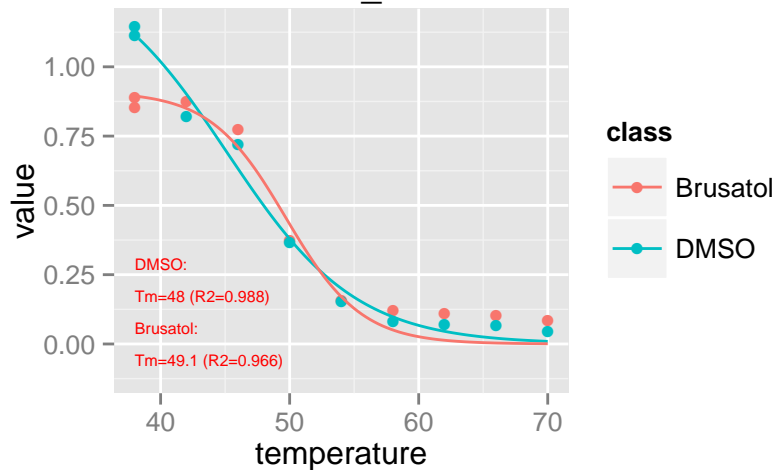

Prot: PDIA6\_HUMAN

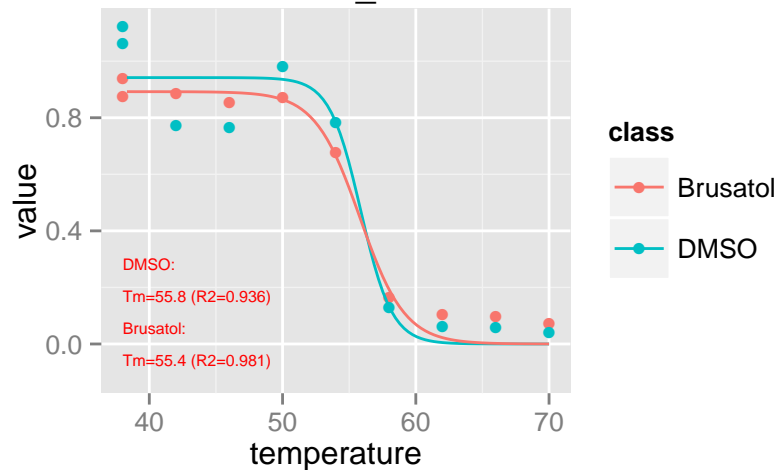

Prot: PDIP2\_HUMAN

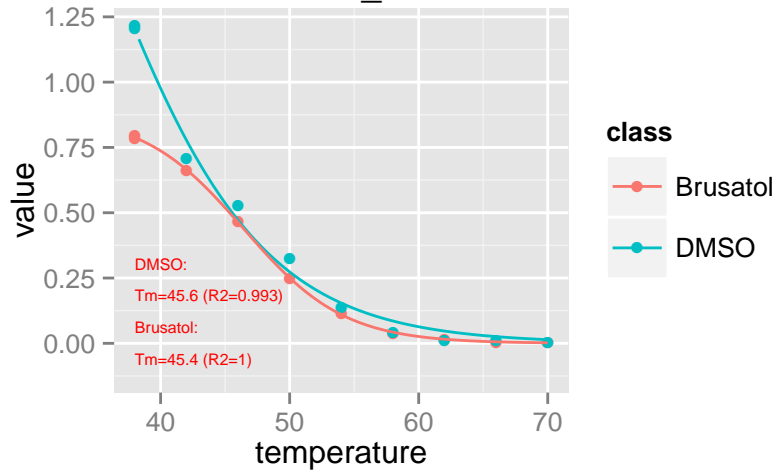

Prot: PDLI1\_HUMAN

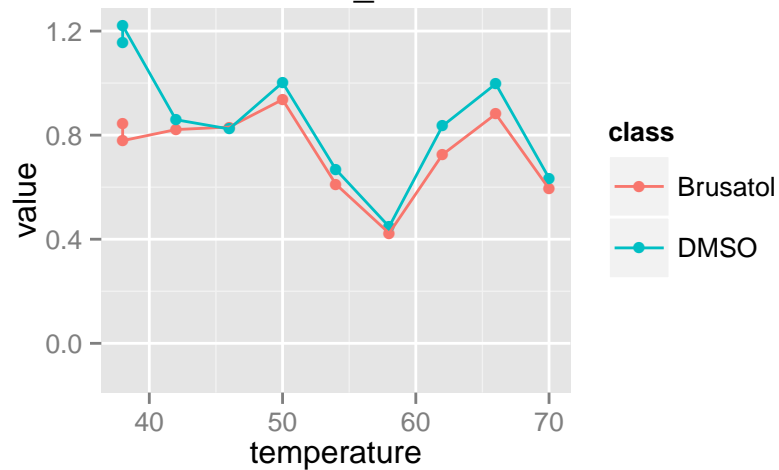

Prot: PDLI2\_HUMAN

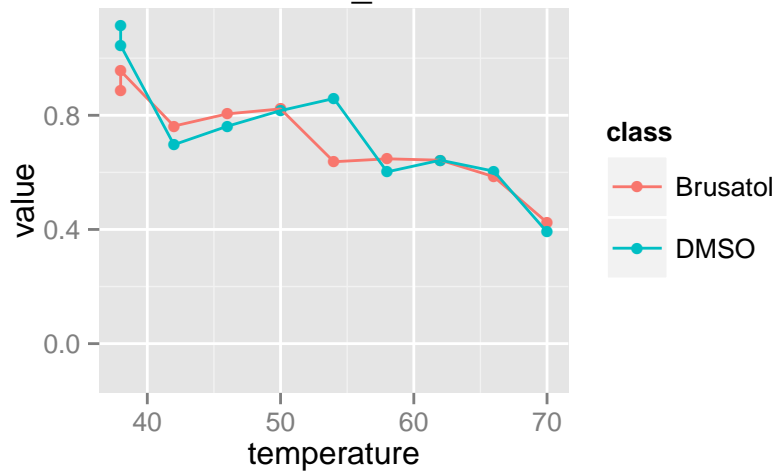

Prot: PDLI5\_HUMAN

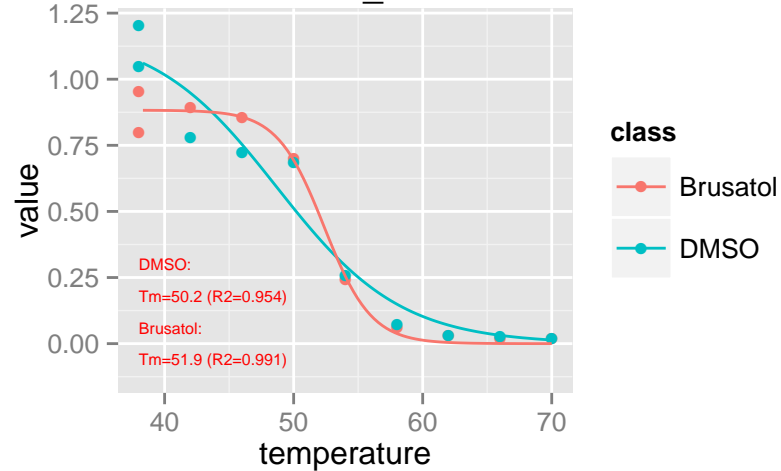

Prot: PDLI7\_HUMAN

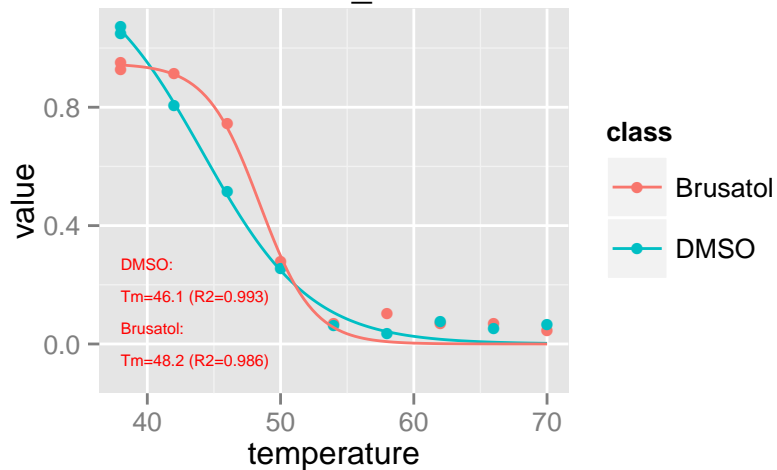

Prot: PDPK1\_HUMAN

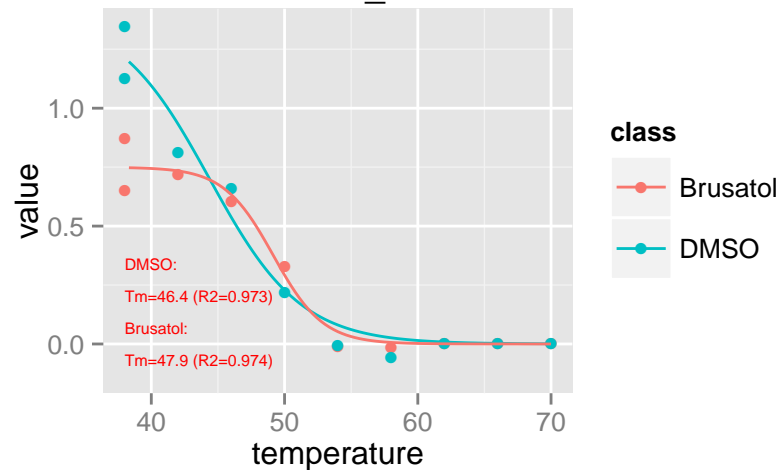

Prot: PDPR\_HUMAN

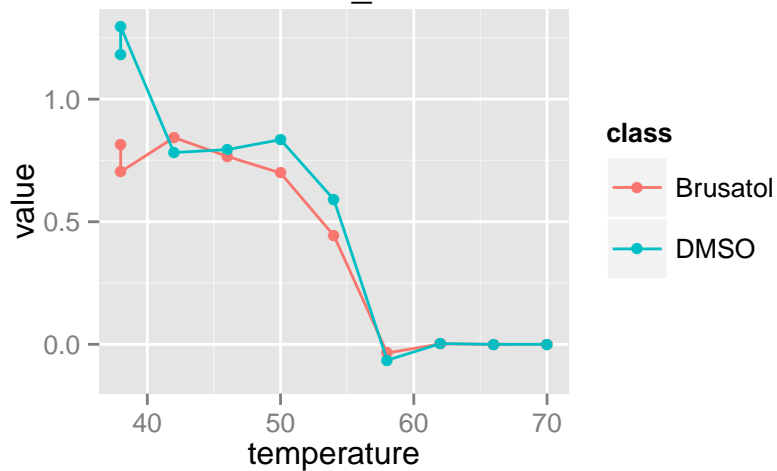

Prot: PDS5A\_HUMAN

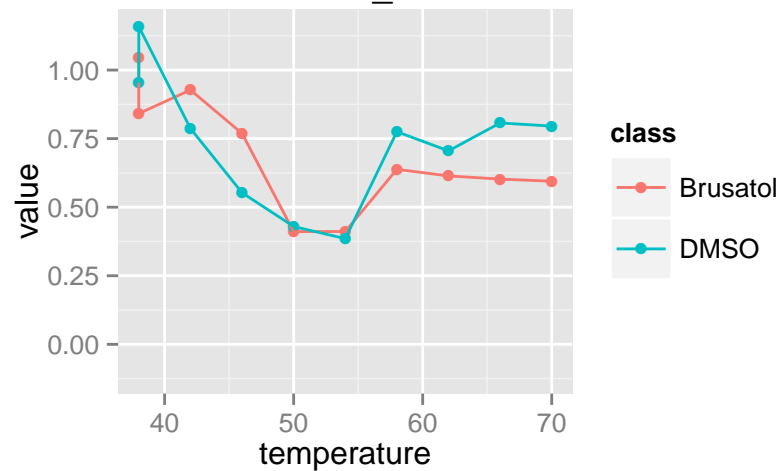

Prot: PDXD1\_HUMAN

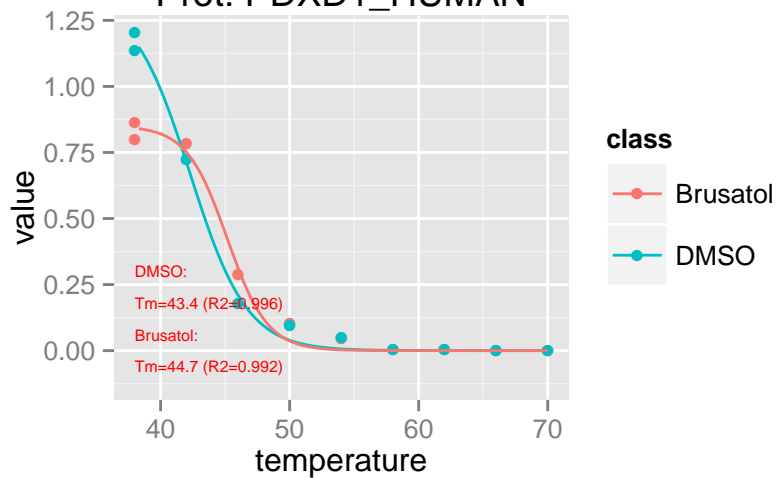

Prot: PDXK\_HUMAN

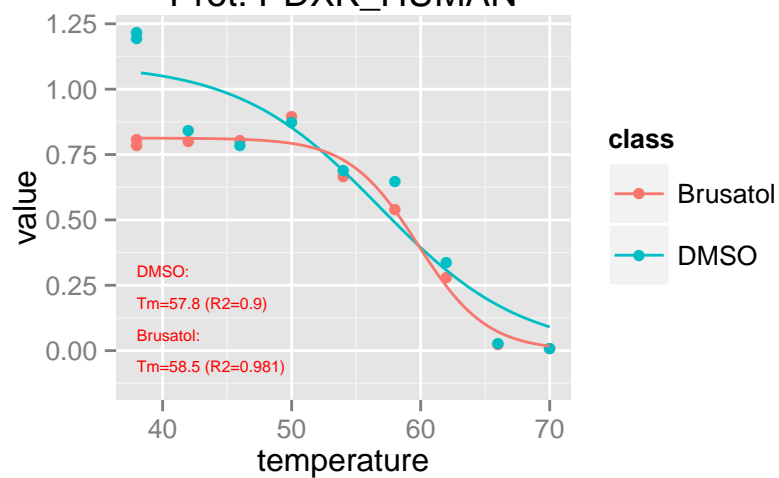

Prot: PDZ11\_HUMAN

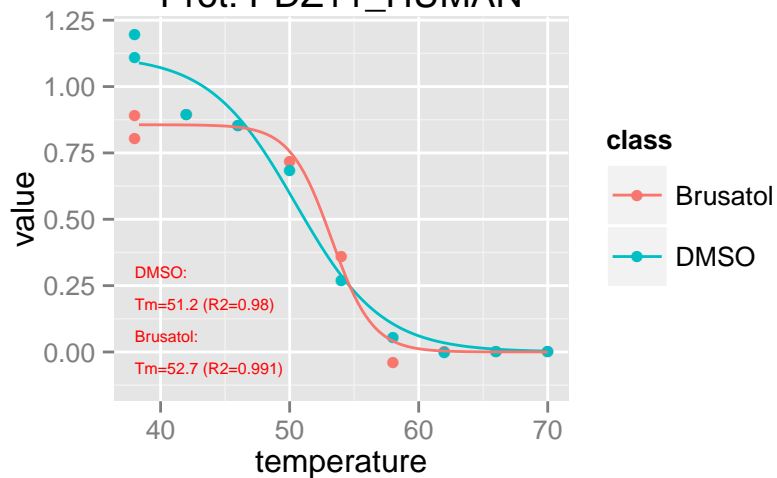

Prot: PEA15\_HUMAN

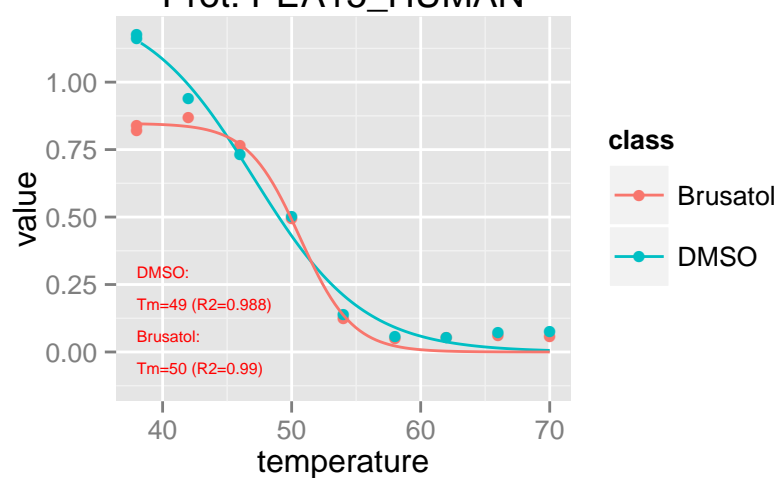

Prot: PEBB\_HUMAN

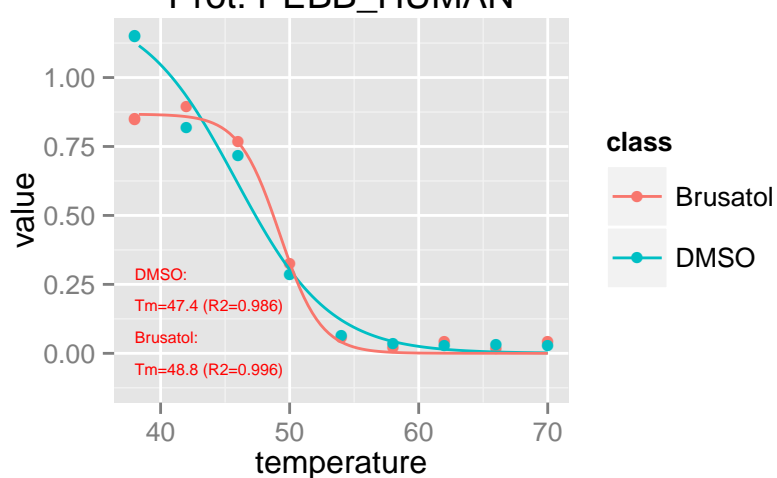

Prot: PEBP1\_HUMAN

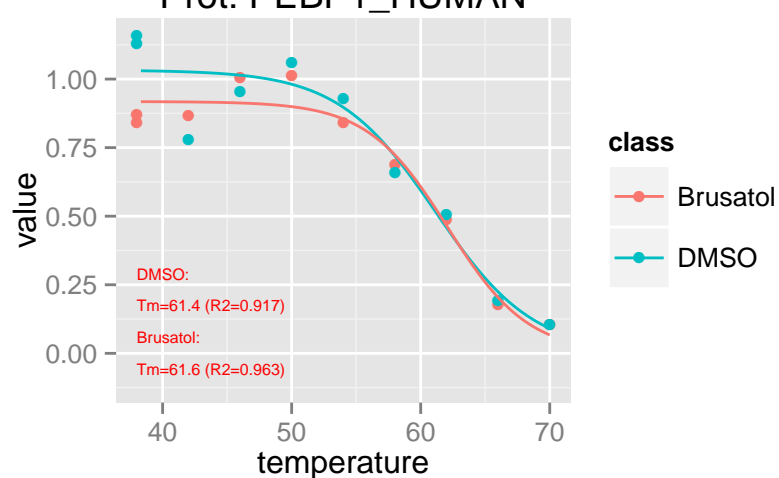

Prot: PEF1\_HUMAN

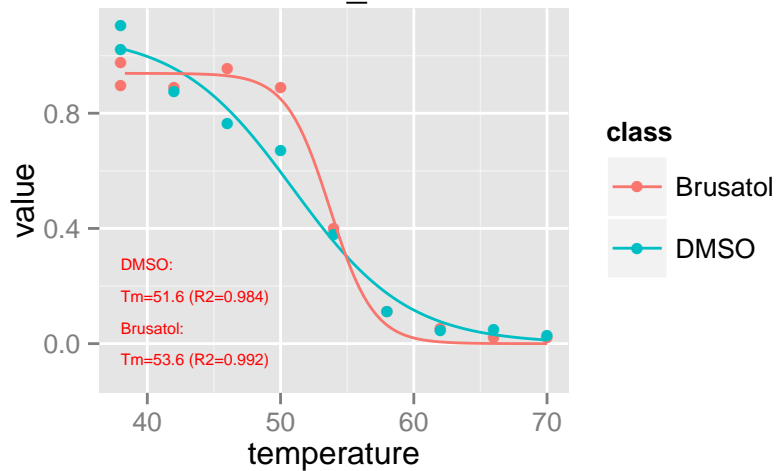

Prot: PEG10\_HUMAN

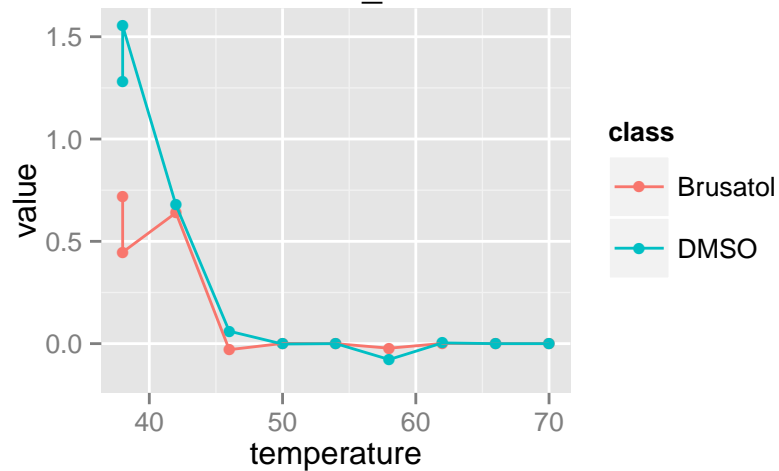

Prot: PELO\_HUMAN

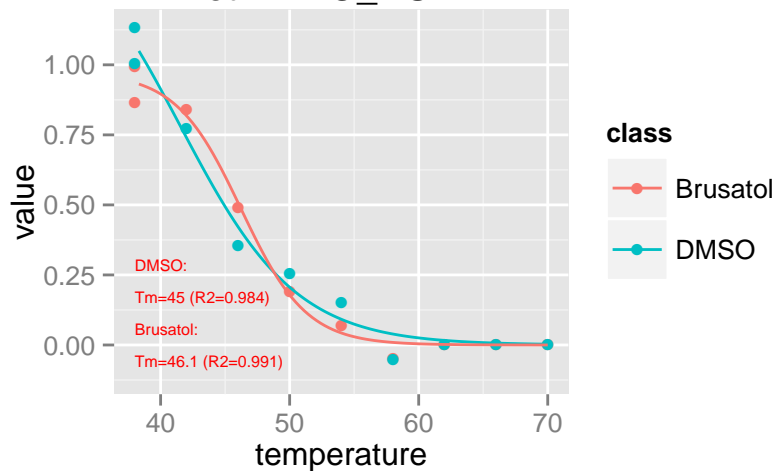

Prot: PELP1\_HUMAN

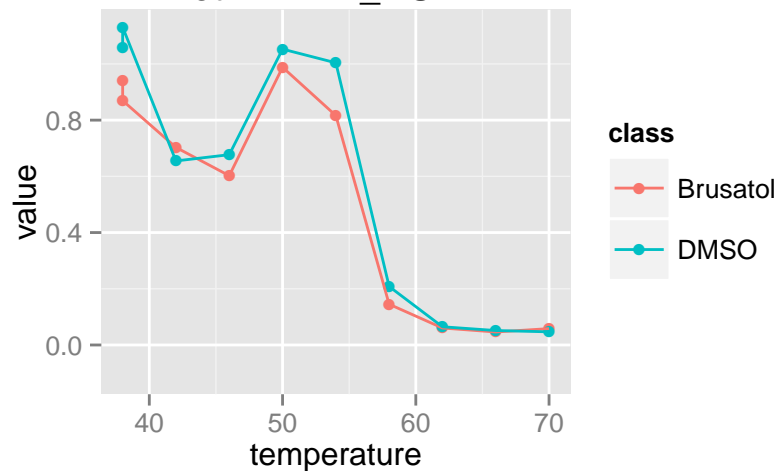

Prot: PEPD\_HUMAN

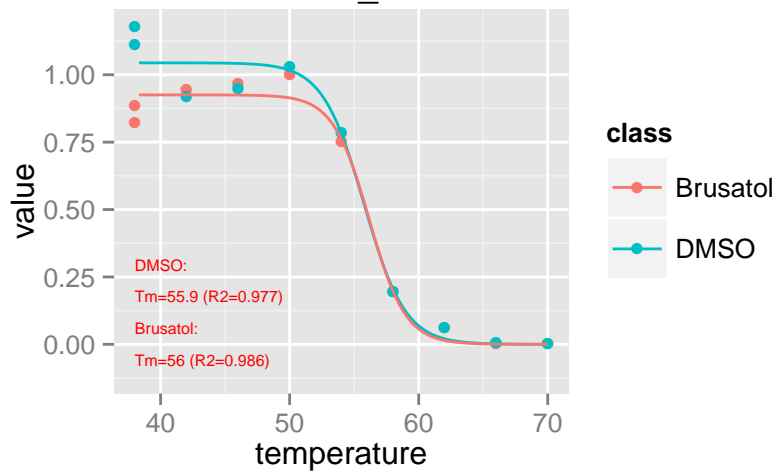

Prot: PEPL\_HUMAN

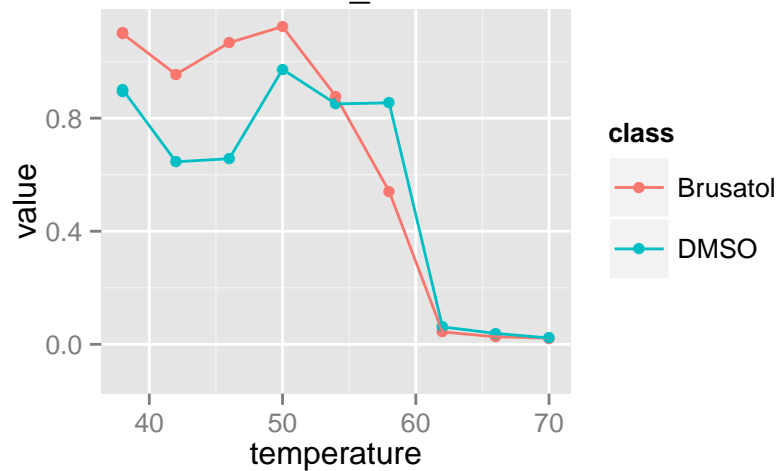

Prot: PEPL1\_HUMAN

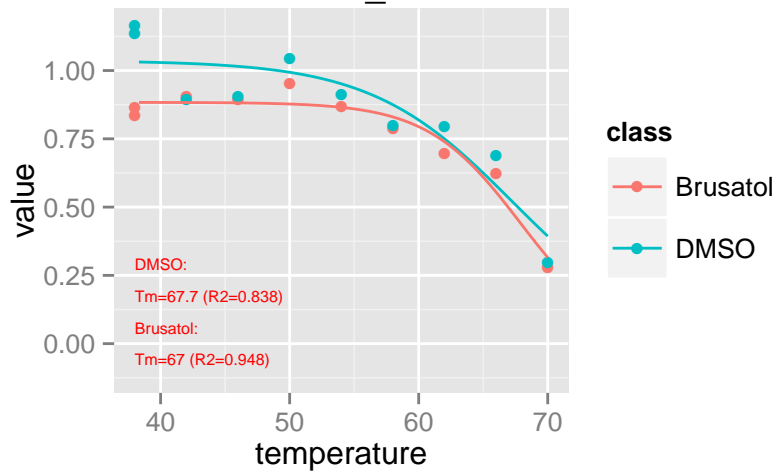

Prot: PERQ2\_HUMAN

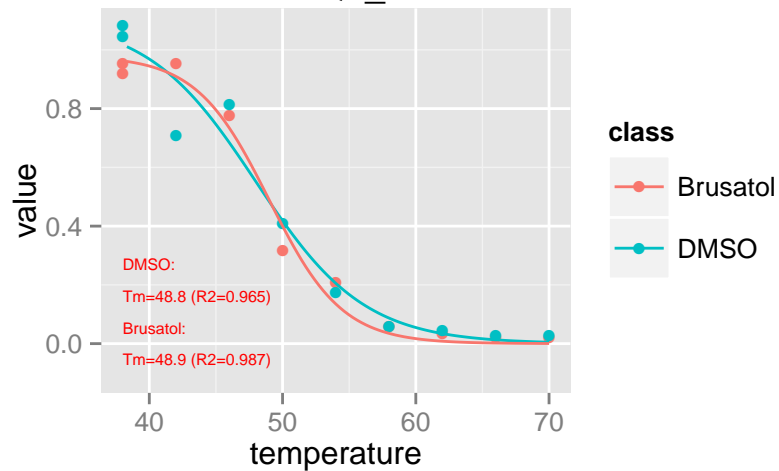

Prot: PESC\_HUMAN

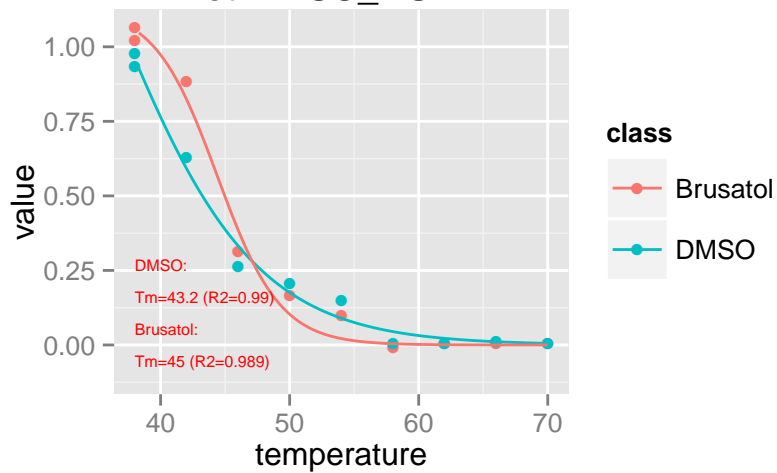

Prot: PEX19\_HUMAN

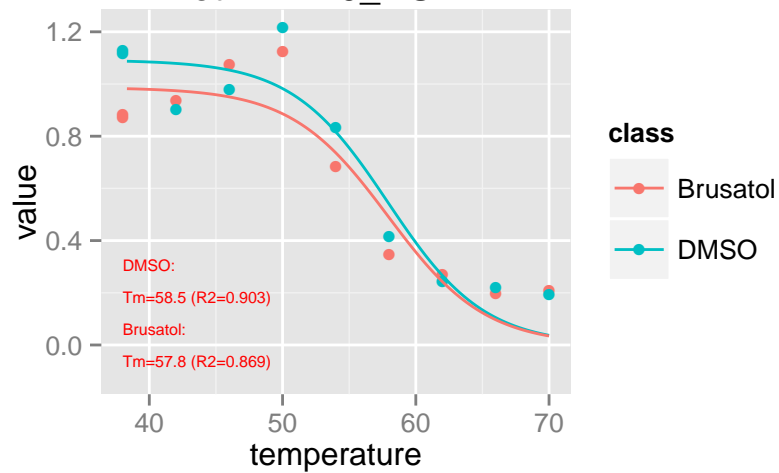

Prot: PFD1\_HUMAN

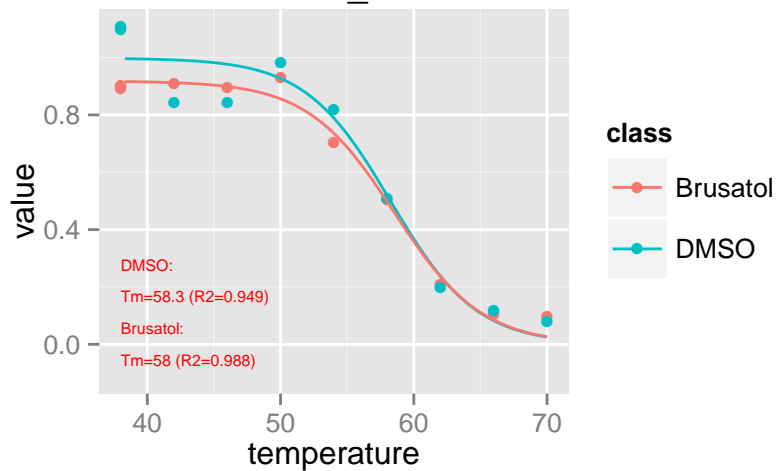

Prot: PFD2\_HUMAN

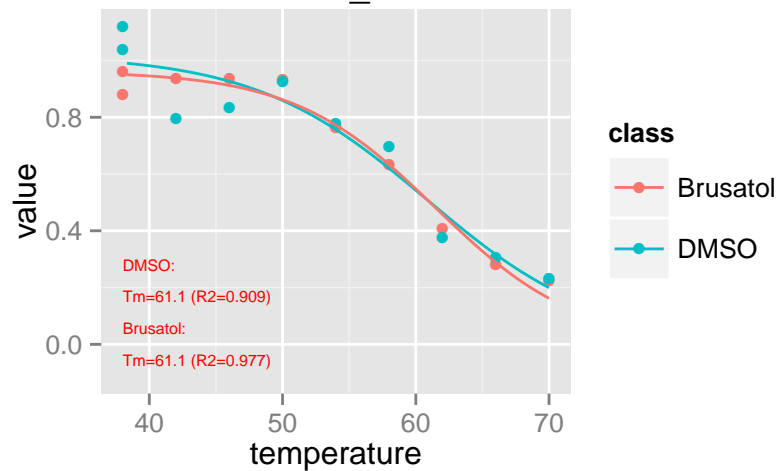

Prot: PFD3\_HUMAN

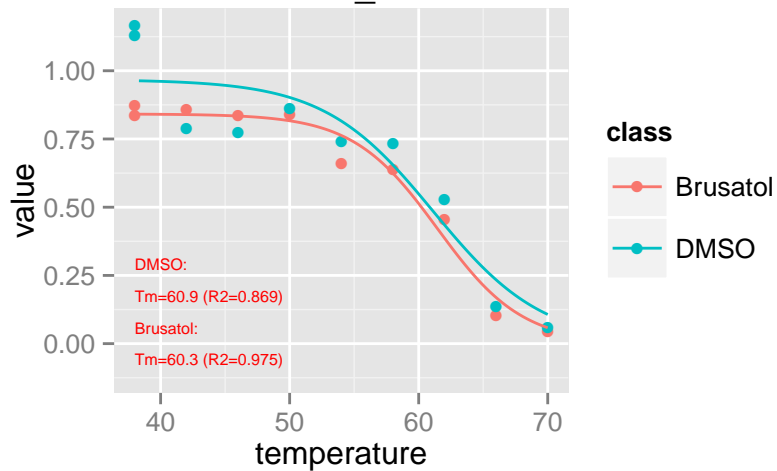

Prot: PFD4\_HUMAN

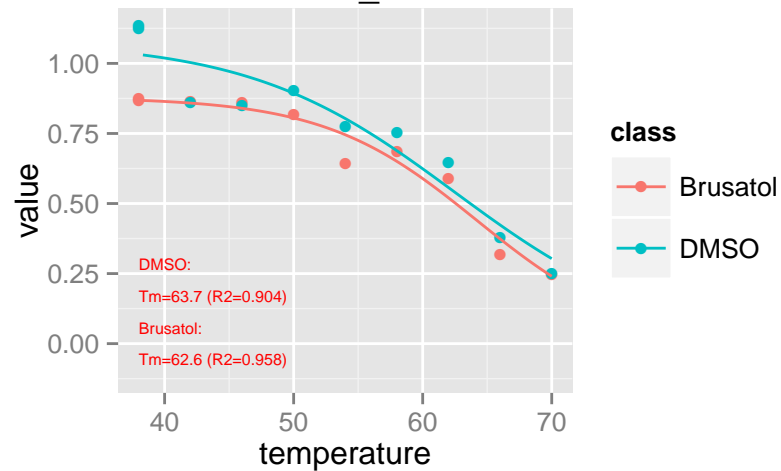

Prot: PFD5\_HUMAN

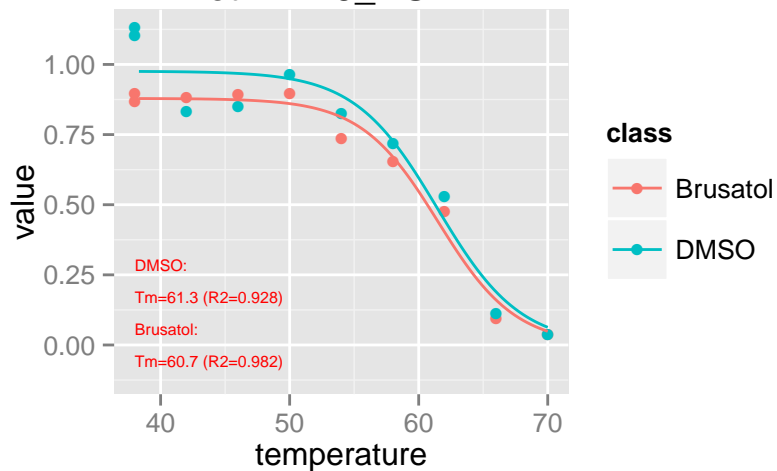

Prot: PFD6\_HUMAN

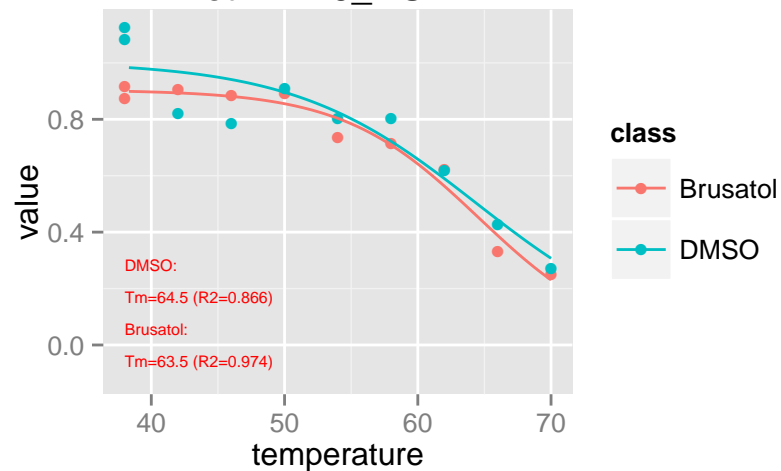

Prot: PGAM1\_HUMAN

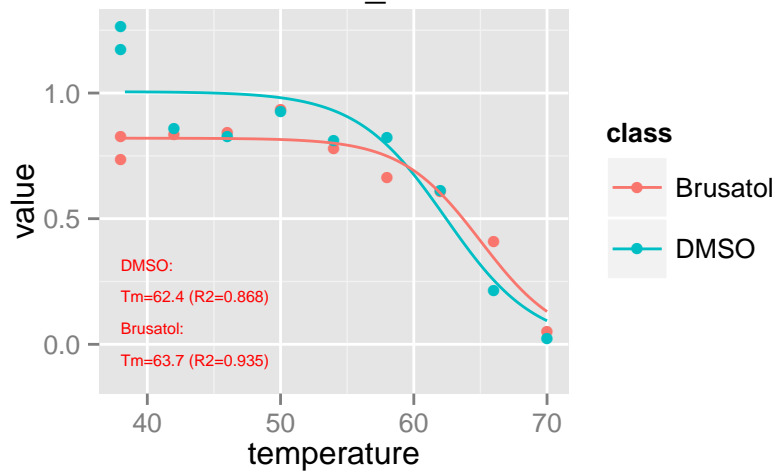

Prot: PGDH\_HUMAN

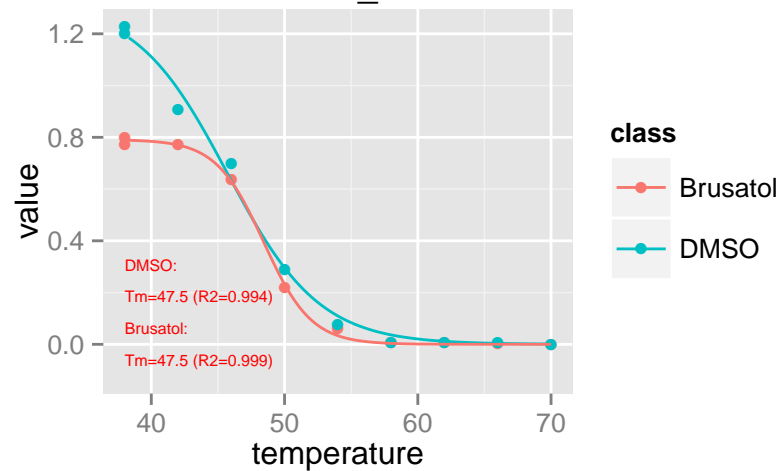

Prot: PGES2\_HUMAN

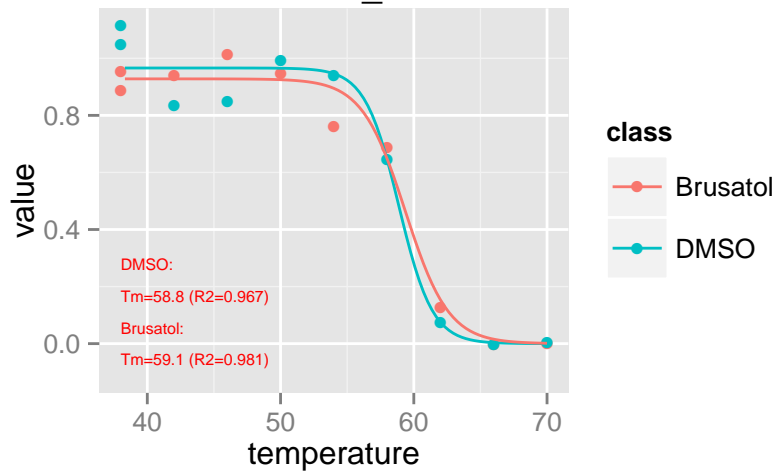

Prot: PGK1\_HUMAN

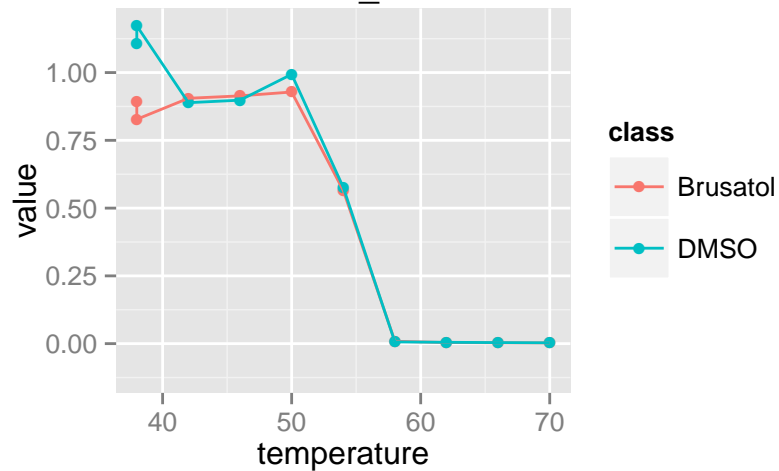

Prot: PGM1\_HUMAN

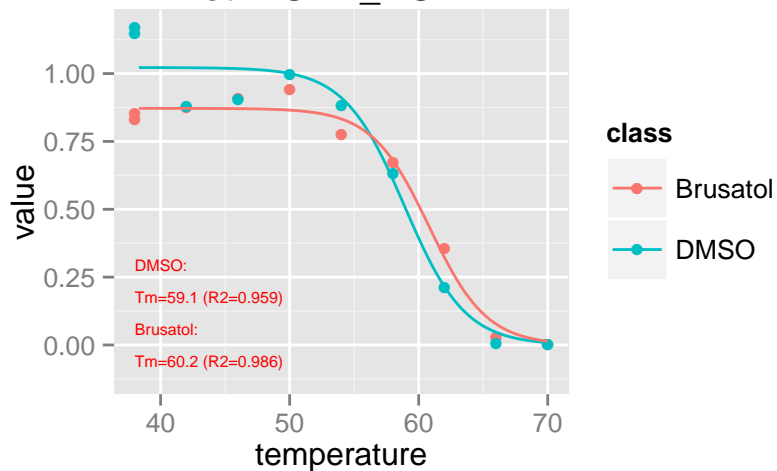

Prot: PGM2\_HUMAN

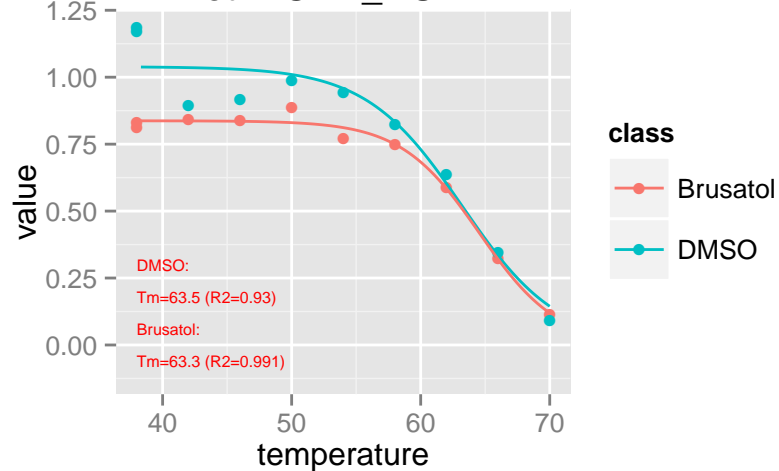

Prot: PGM2L\_HUMAN

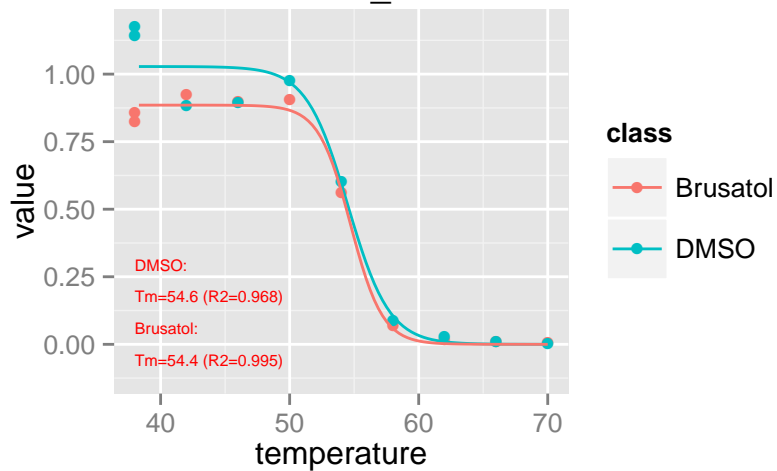

Prot: PGP\_HUMAN

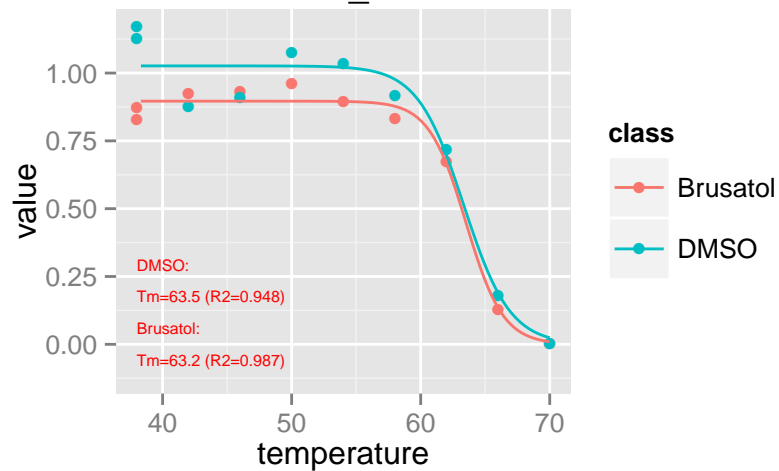

Prot: PGRC1\_HUMAN

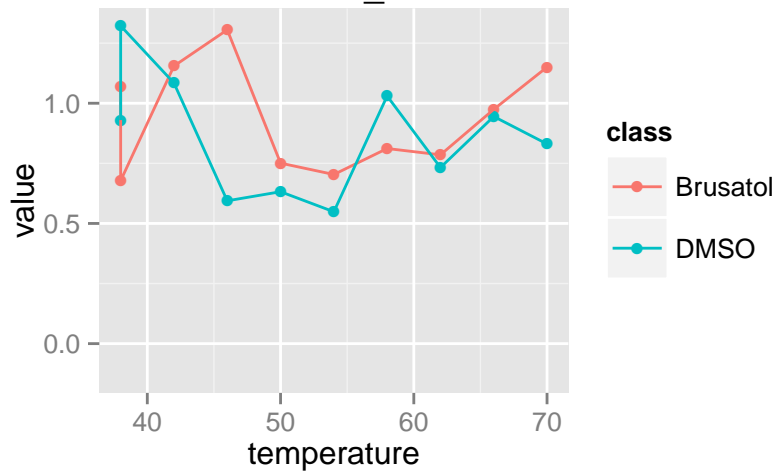

Prot: PGTA\_HUMAN

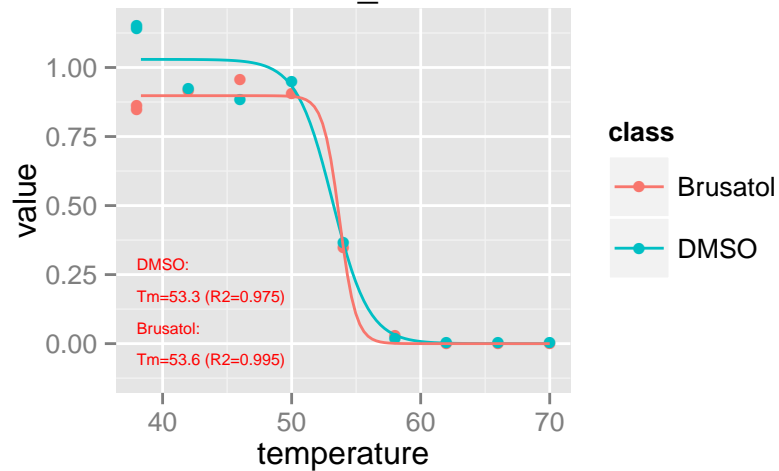

Prot: PGTB2\_HUMAN

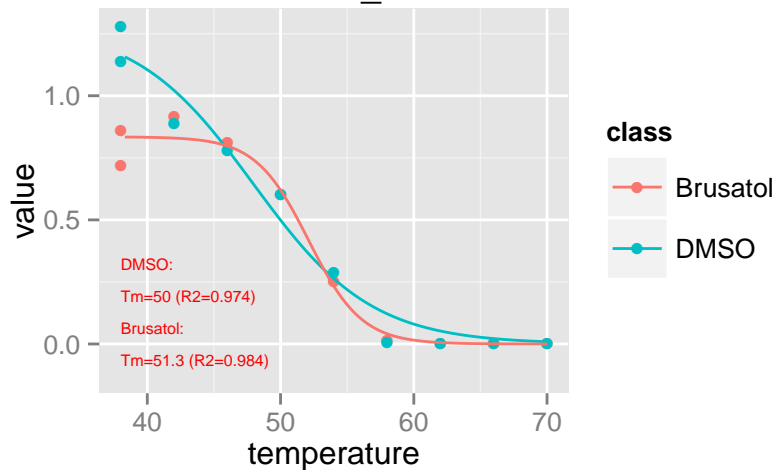

Prot: PHAR4\_HUMAN

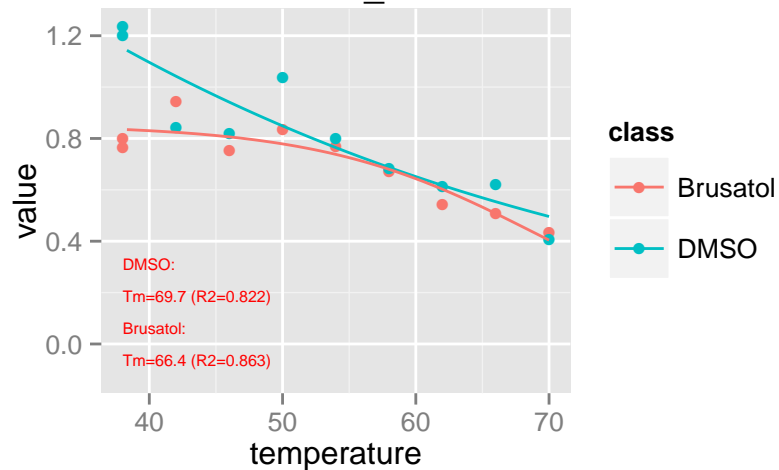

Prot: PHAX\_HUMAN

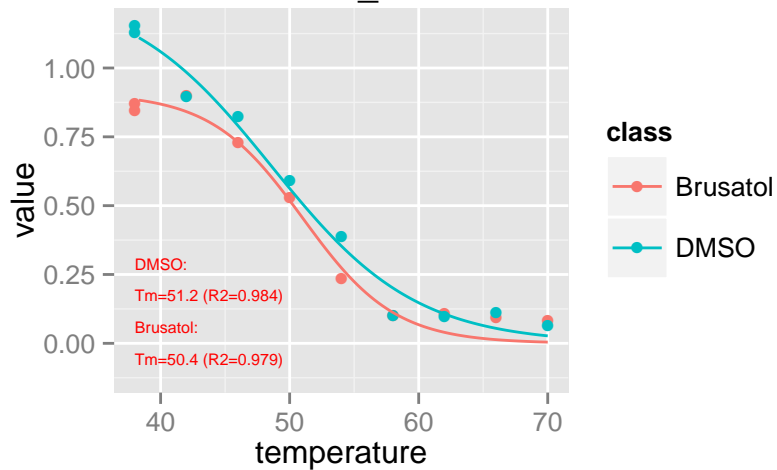

Prot: PHB\_HUMAN

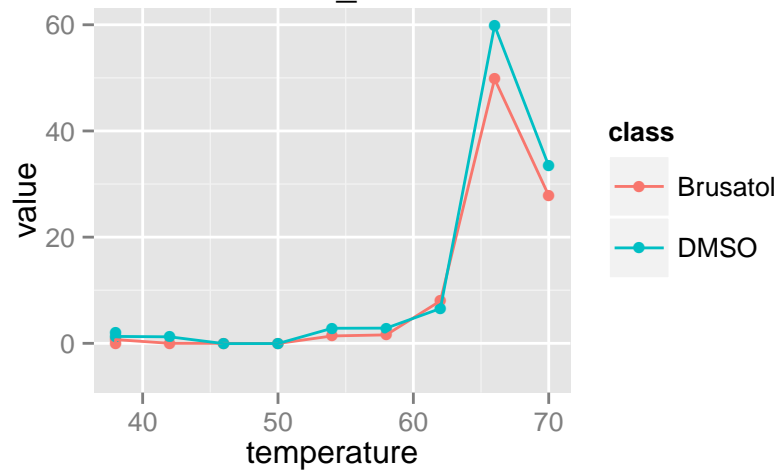



Prot: PHF23\_HUMAN

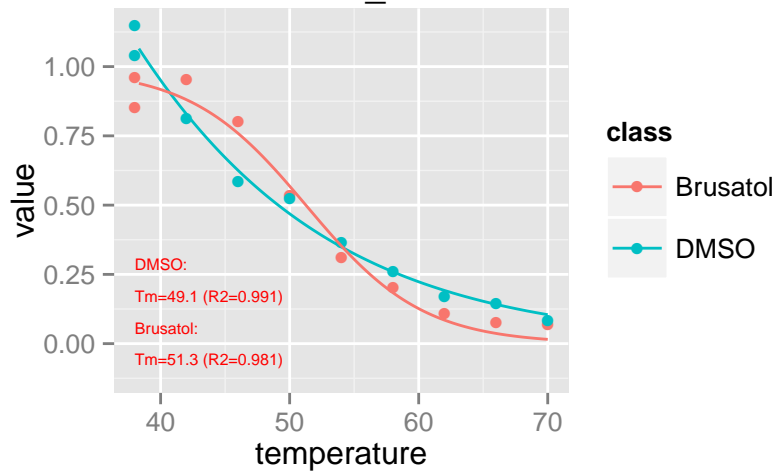

Prot: PHF5A\_HUMAN

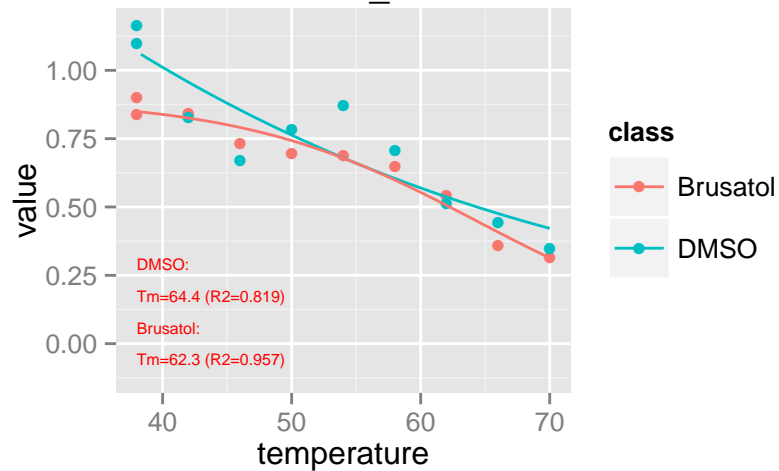

Prot: PHF6\_HUMAN

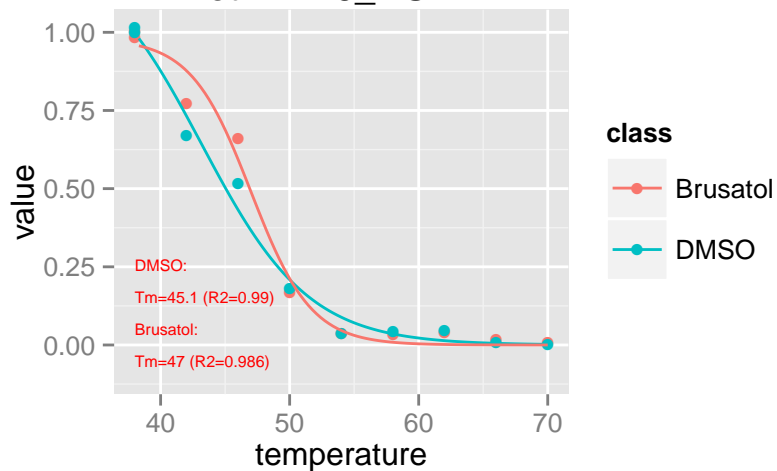

Prot: PHLP\_HUMAN

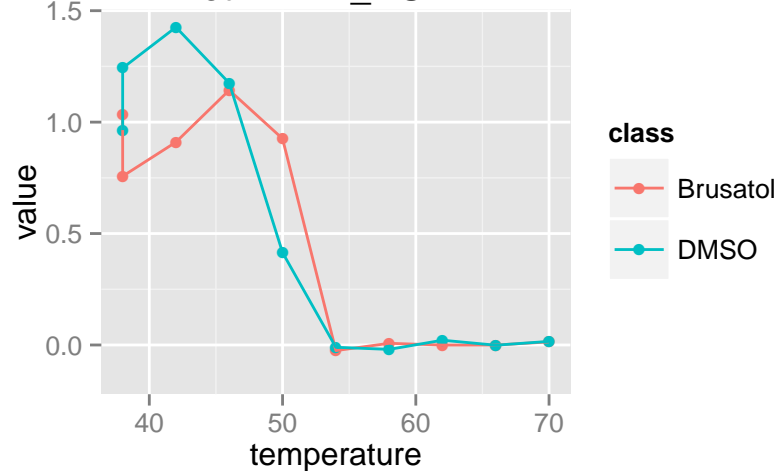

Prot: PHOCN\_HUMAN

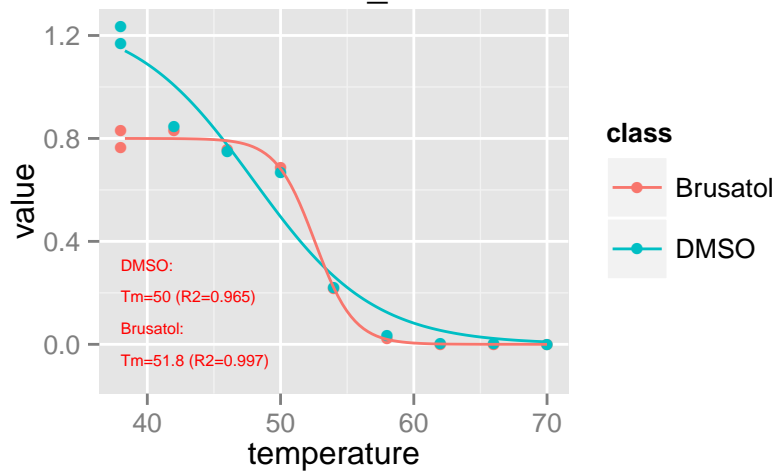

Prot: PHP14\_HUMAN

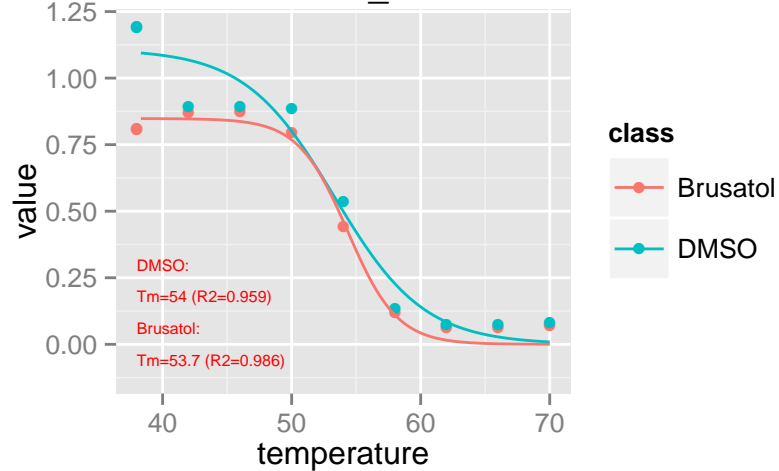

Prot: PI3R4\_HUMAN

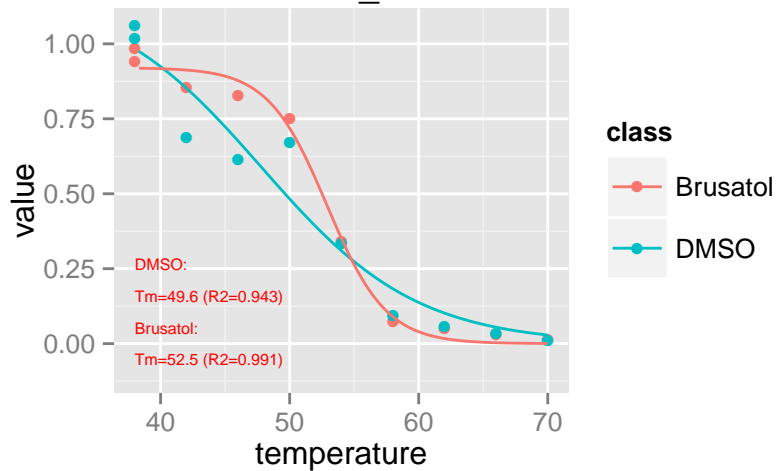

Prot: PI42A\_HUMAN

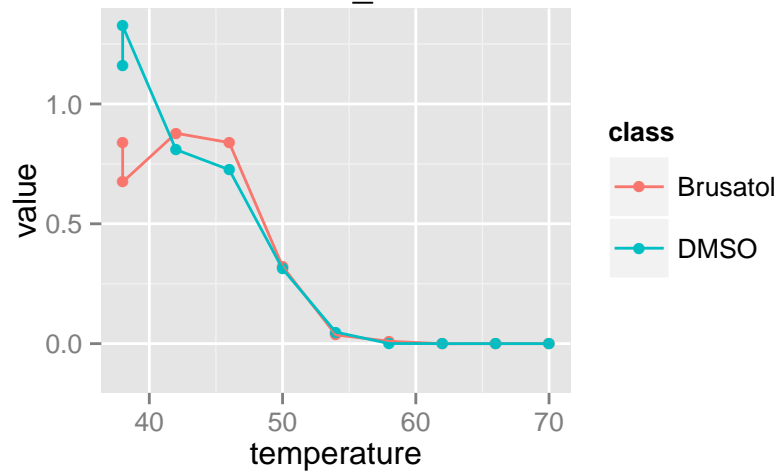

Prot: PI42B\_HUMAN

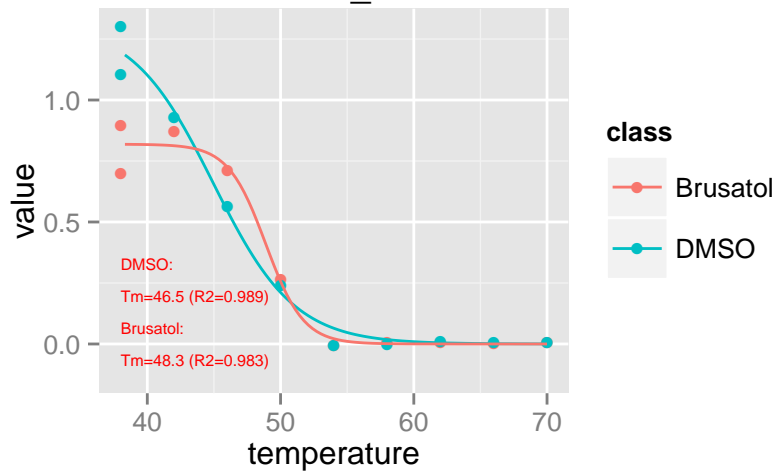

Prot: PI42C\_HUMAN

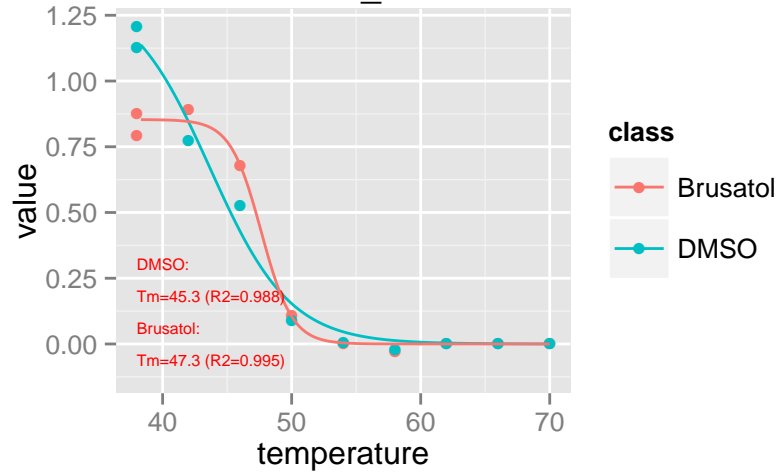

Prot: PI4KB\_HUMAN

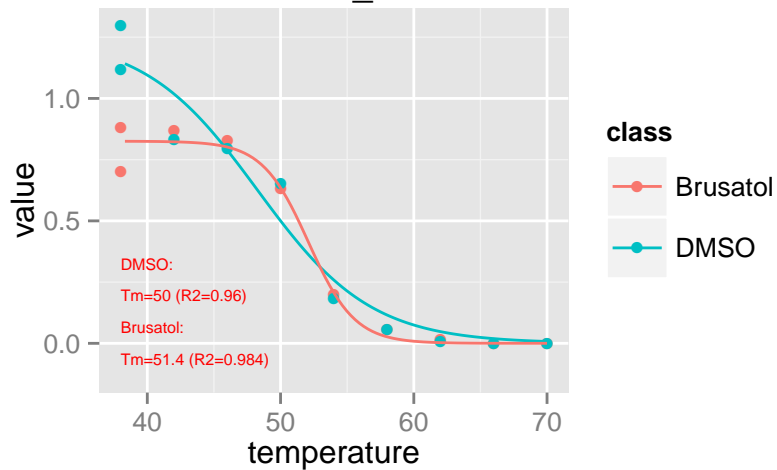

Prot: PICAL\_HUMAN

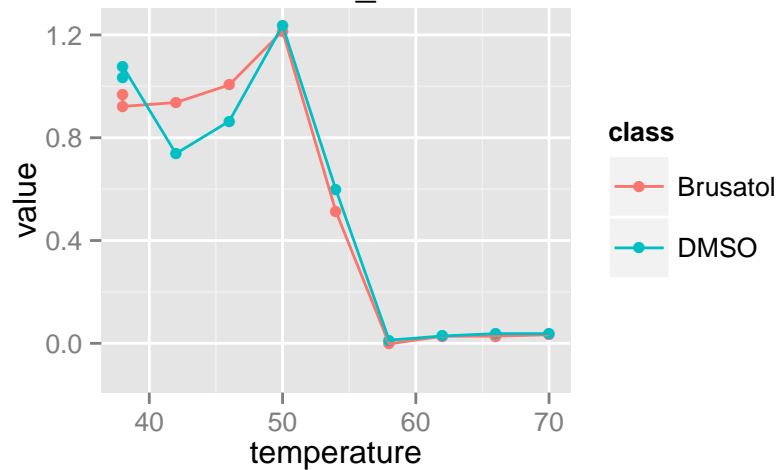

Prot: PIHD1\_HUMAN

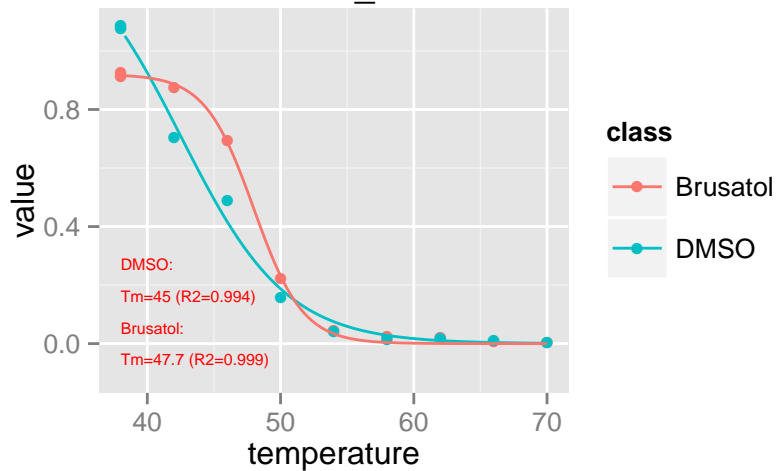

Prot: PIMT\_HUMAN

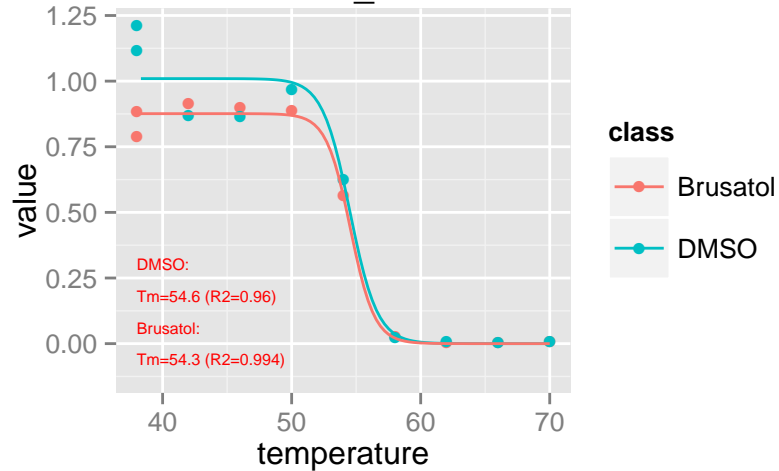

Prot: PIN1\_HUMAN

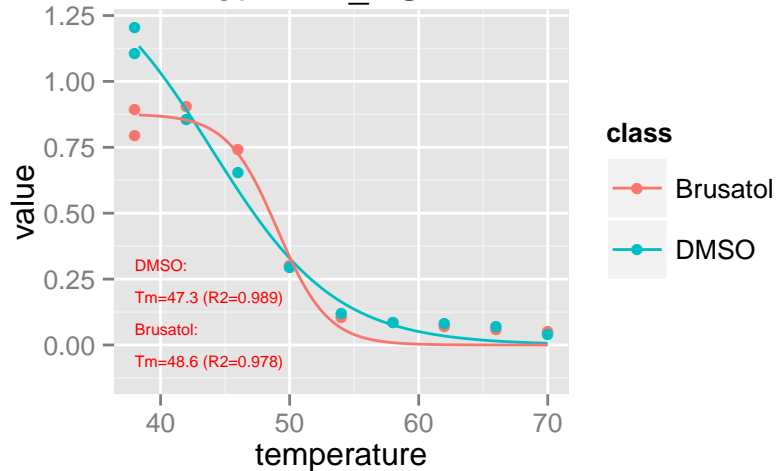

Prot: PIN4\_HUMAN

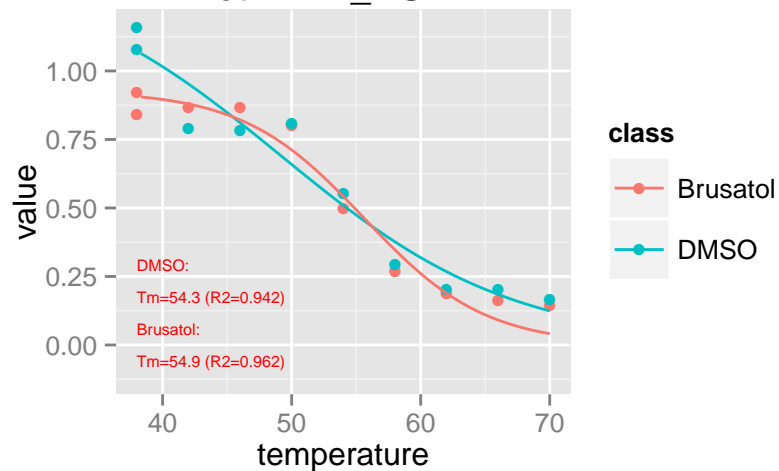

Prot: PININ\_HUMAN

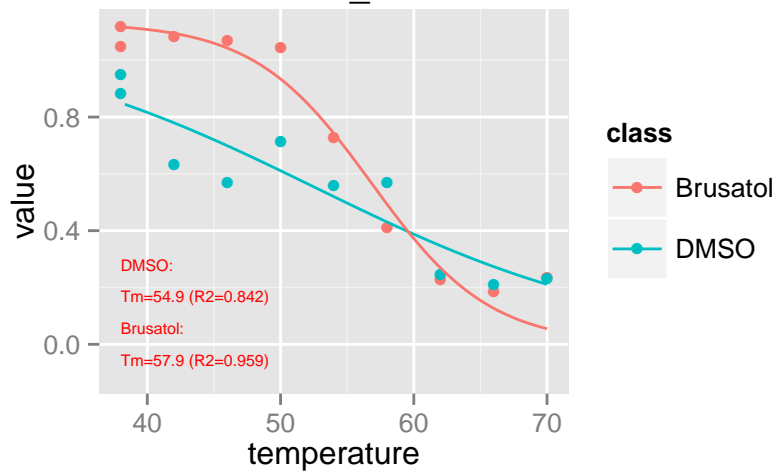

Prot: PIPNA\_HUMAN

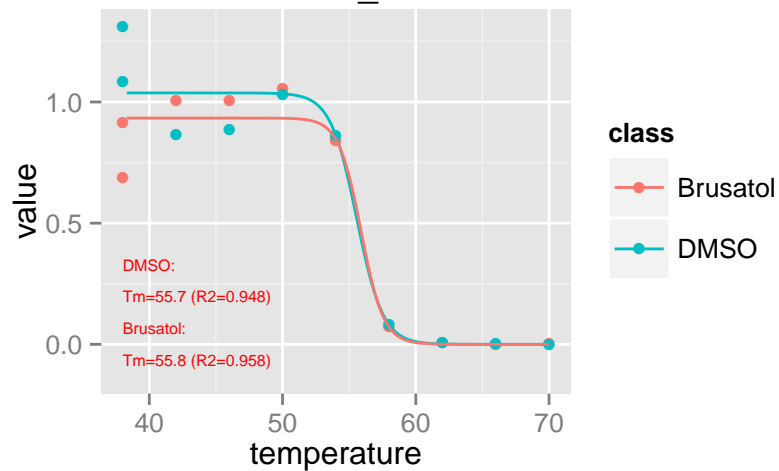

Prot: PIPNB\_HUMAN

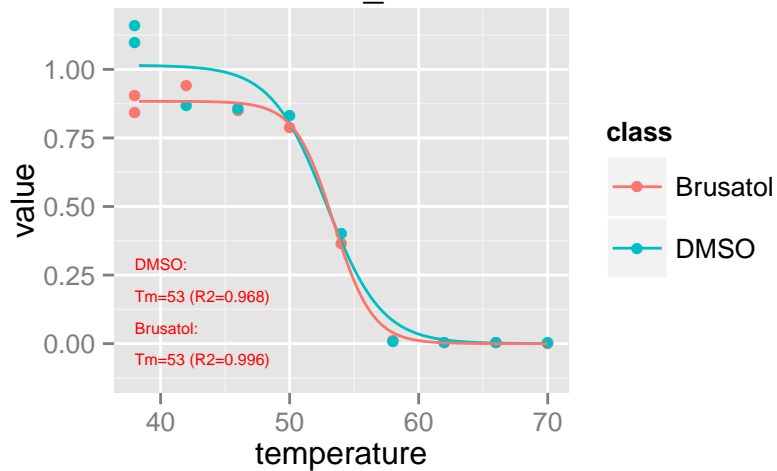

Prot: PIPSL\_HUMAN

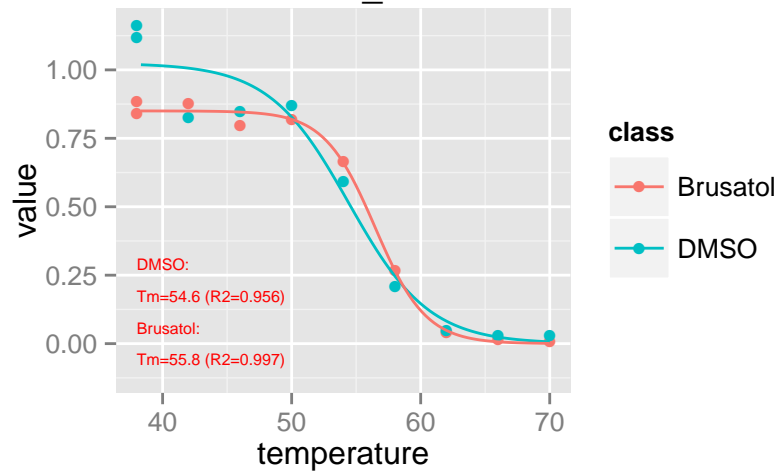

Prot: PIR\_HUMAN

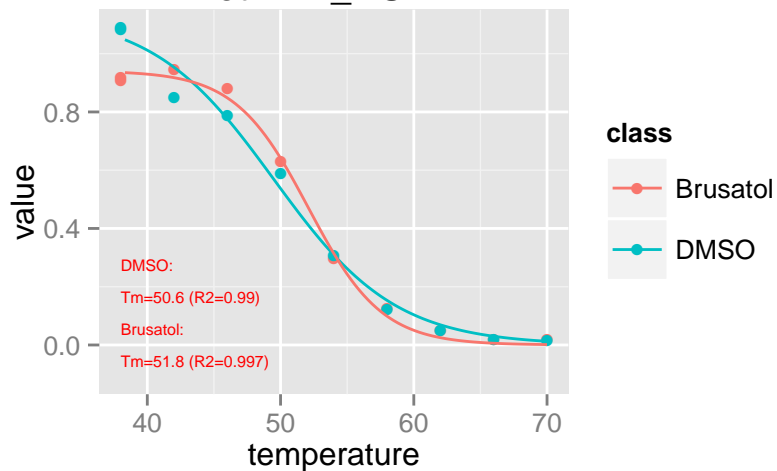

Prot: PITH1\_HUMAN

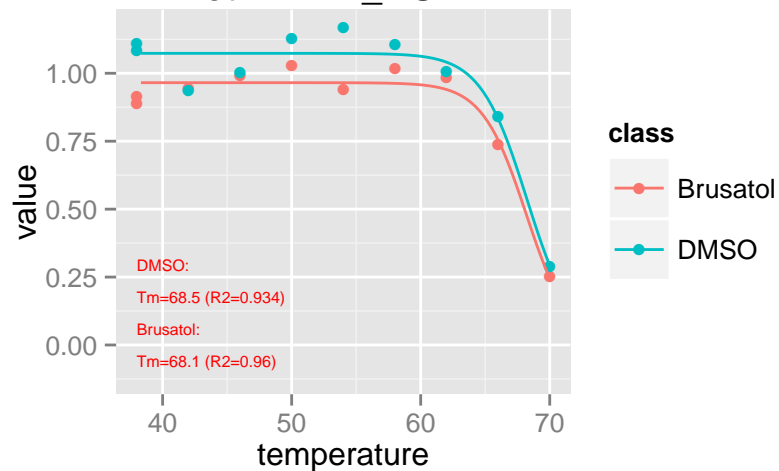

Prot: PK3C3\_HUMAN

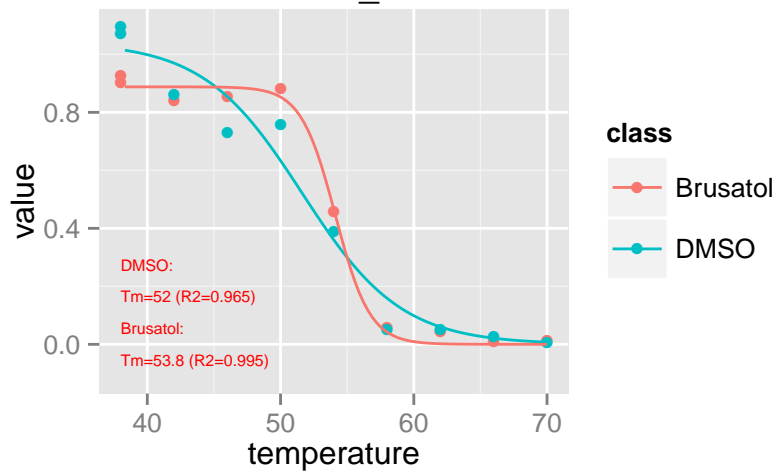

Prot: PKN1\_HUMAN

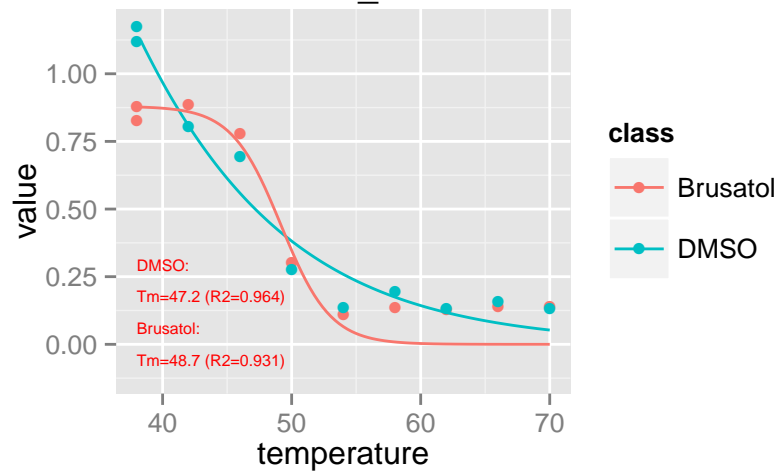

Prot: PKN2\_HUMAN

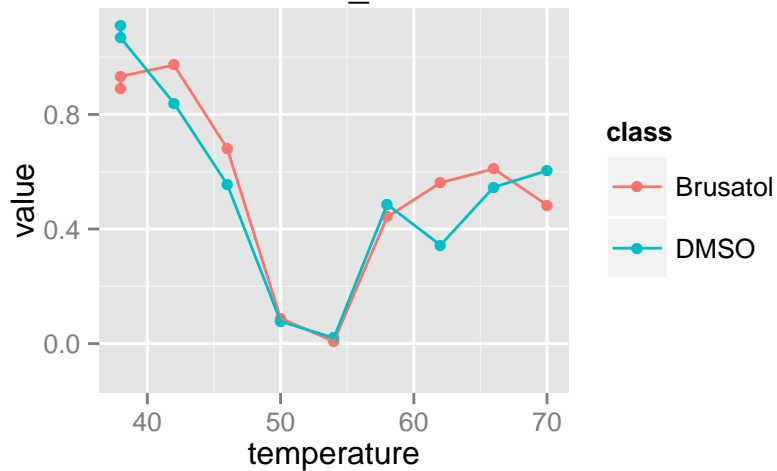

Prot: PLAK\_HUMAN

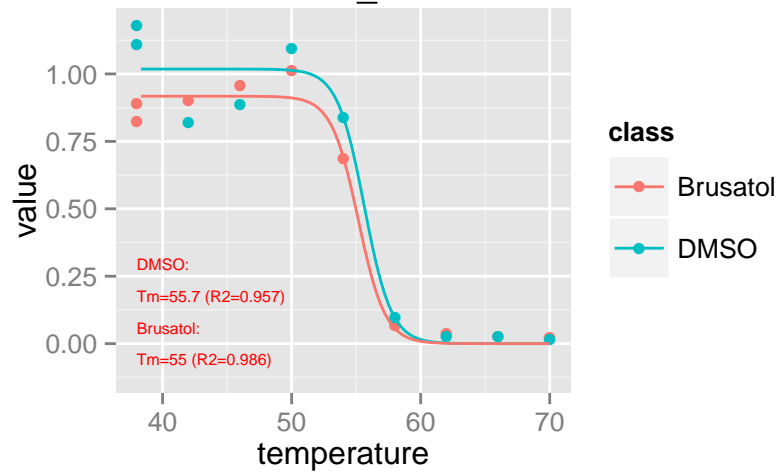

Prot: PLAP\_HUMAN

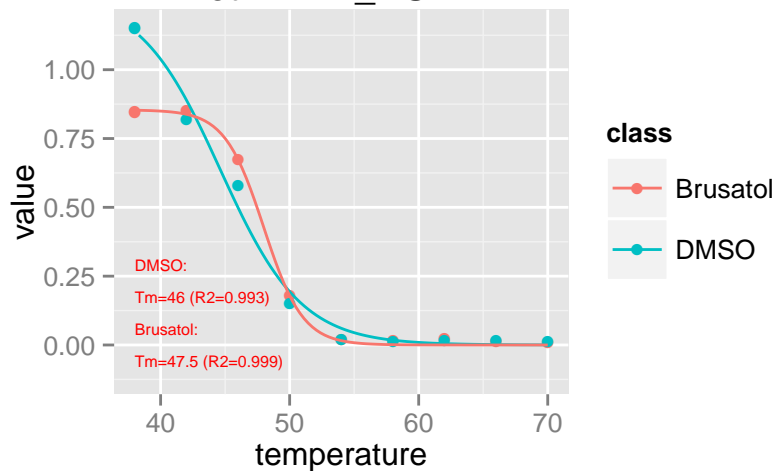

Prot: PLBL2\_HUMAN

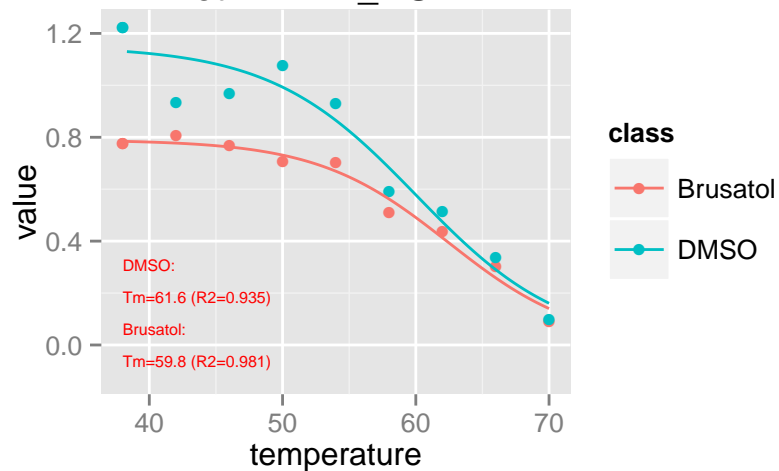

Prot: PLCB3\_HUMAN

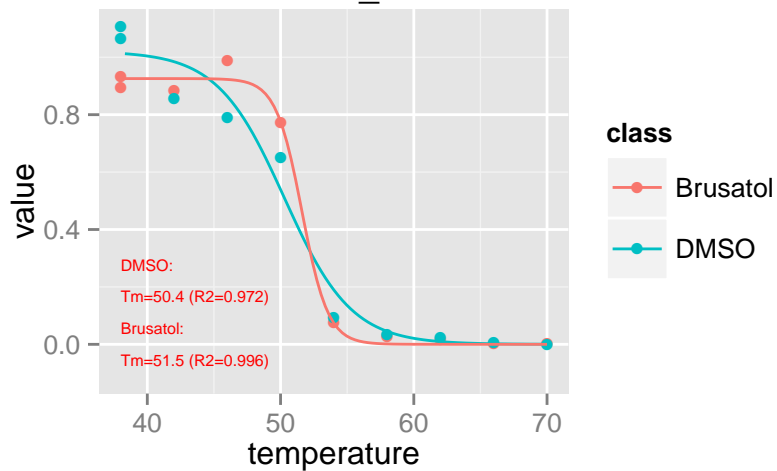

Prot: PLCB4\_HUMAN

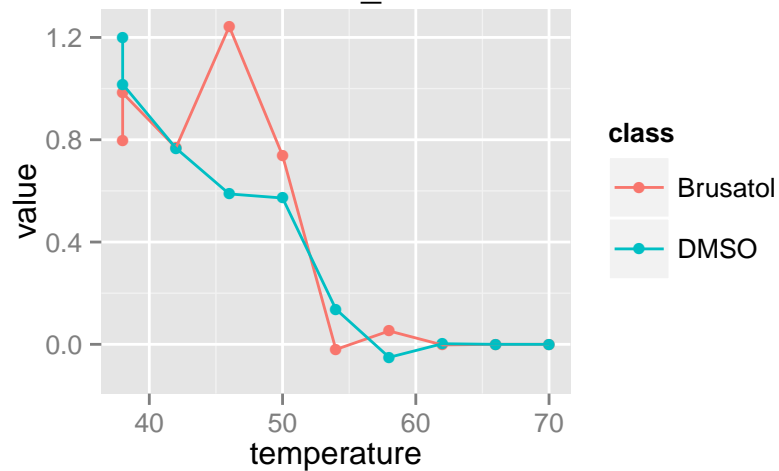

Prot: PLCG1\_HUMAN

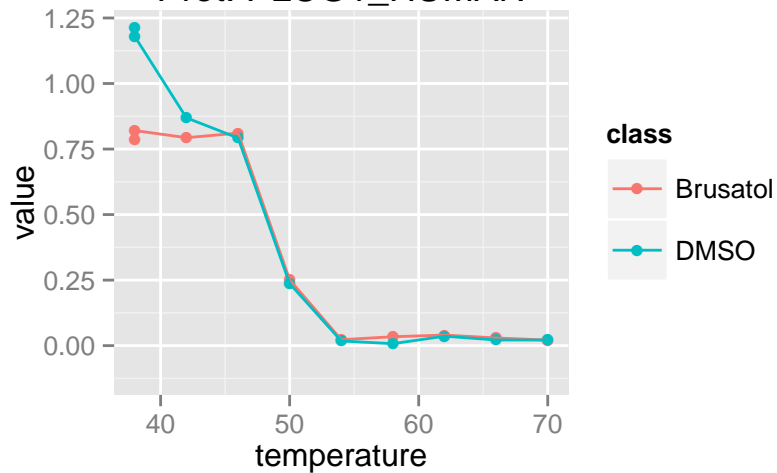

Prot: PLD3\_HUMAN

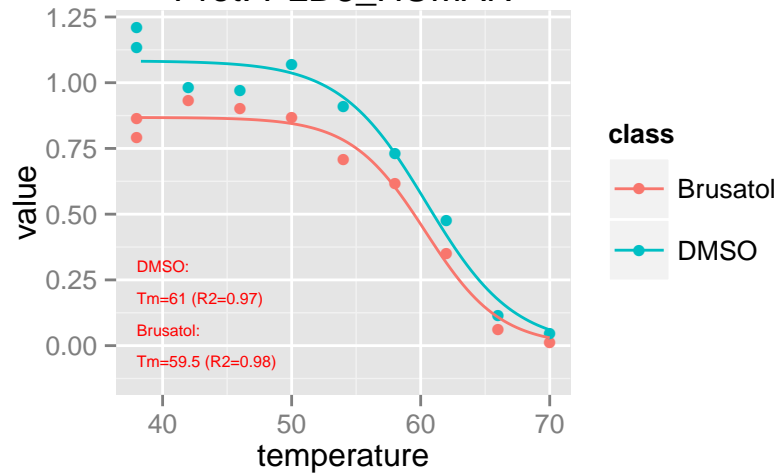

Prot: PLEC\_HUMAN

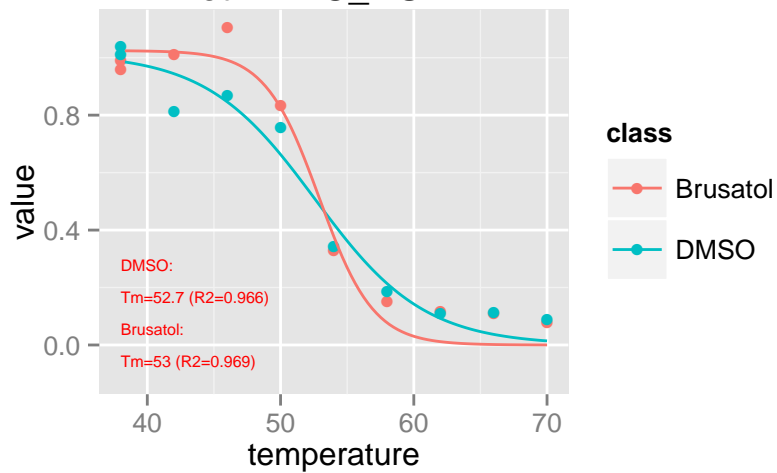

Prot: PLIN3\_HUMAN

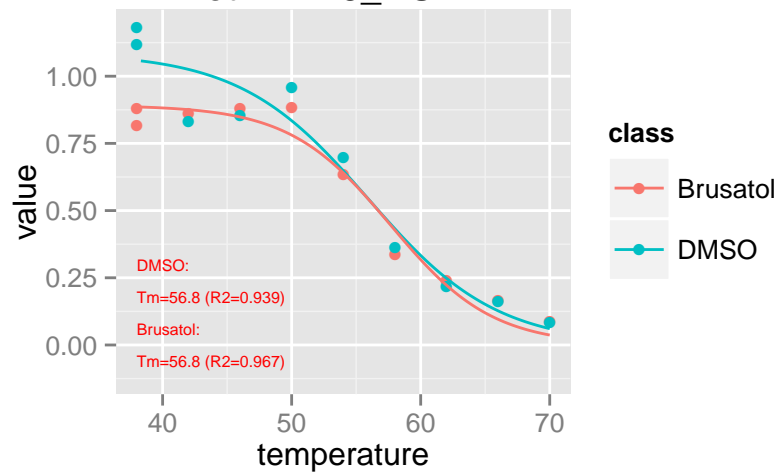

Prot: PLOD1\_HUMAN

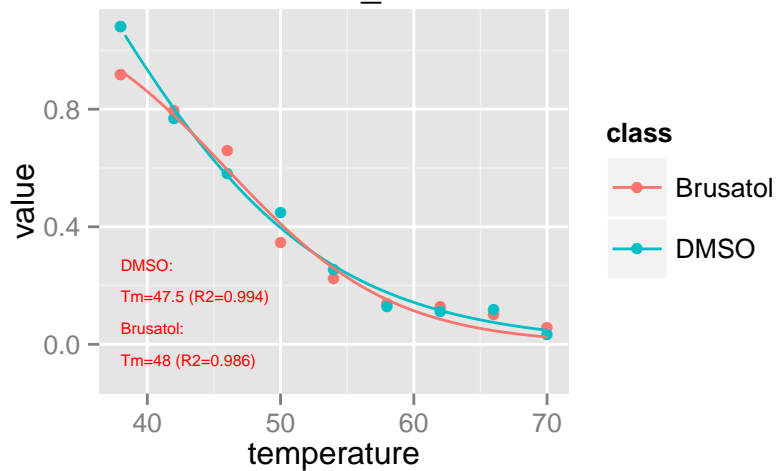

Prot: PLOD2\_HUMAN

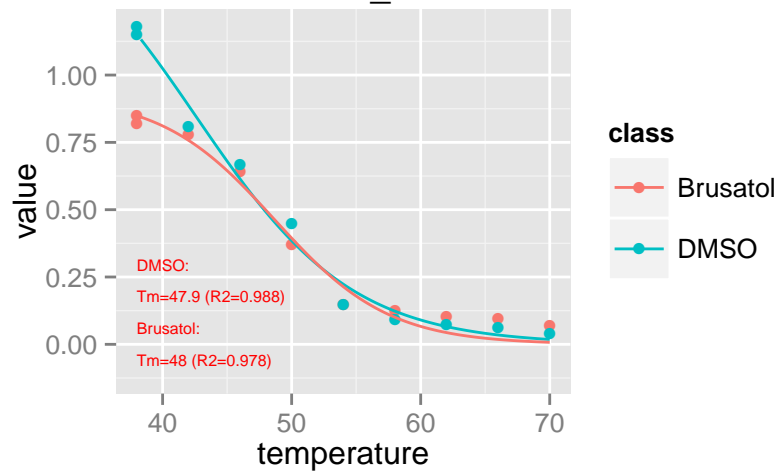

Prot: PLOD3\_HUMAN

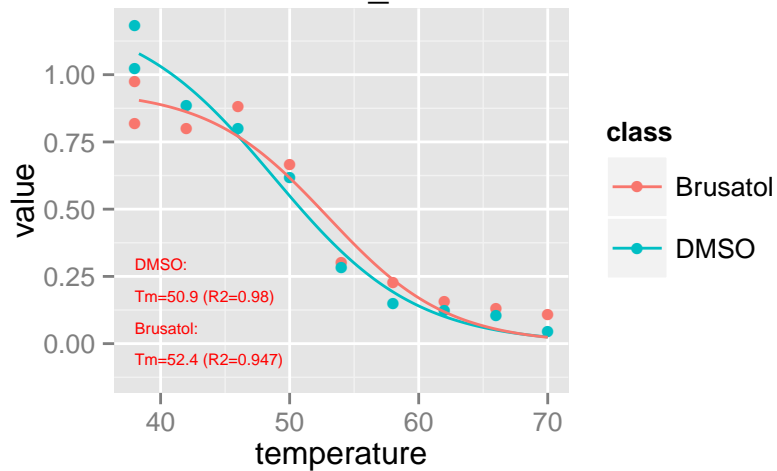

Prot: PLP2\_HUMAN

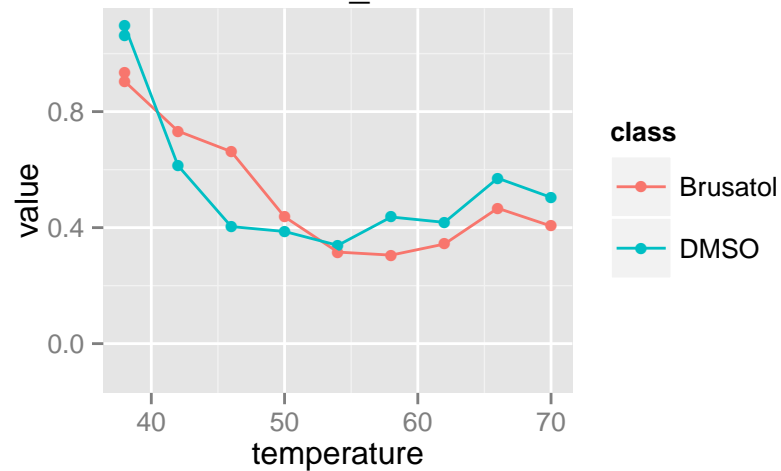

Prot: PLPP\_HUMAN

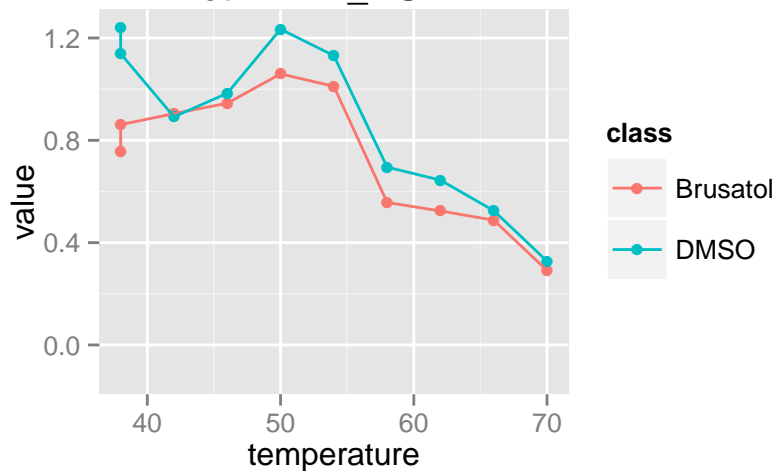

Prot: PLRG1\_HUMAN

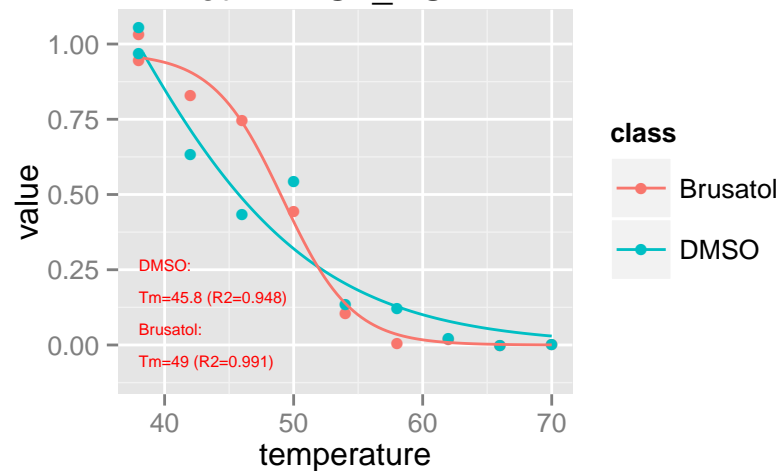

Prot: PLSI\_HUMAN

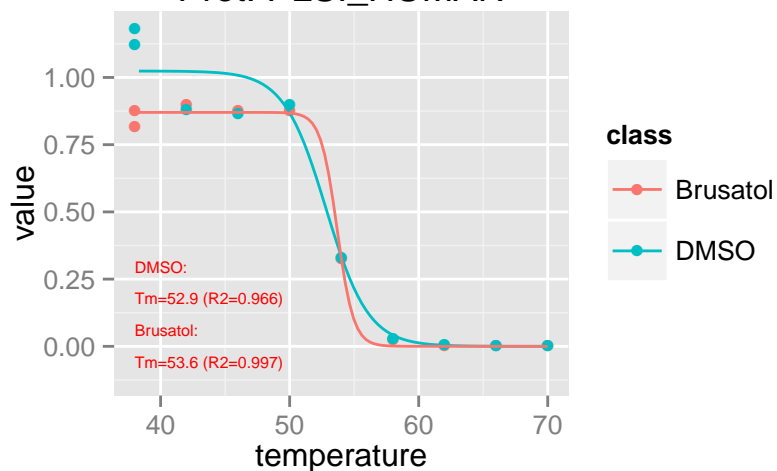

Prot: PLSL\_HUMAN

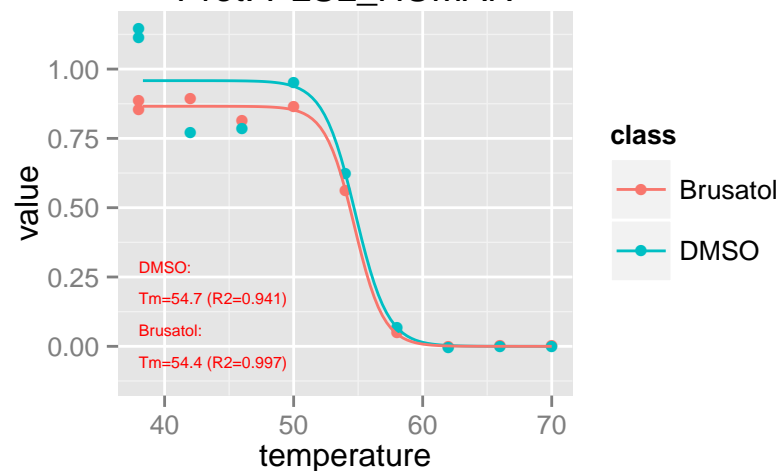

Prot: PLST\_HUMAN

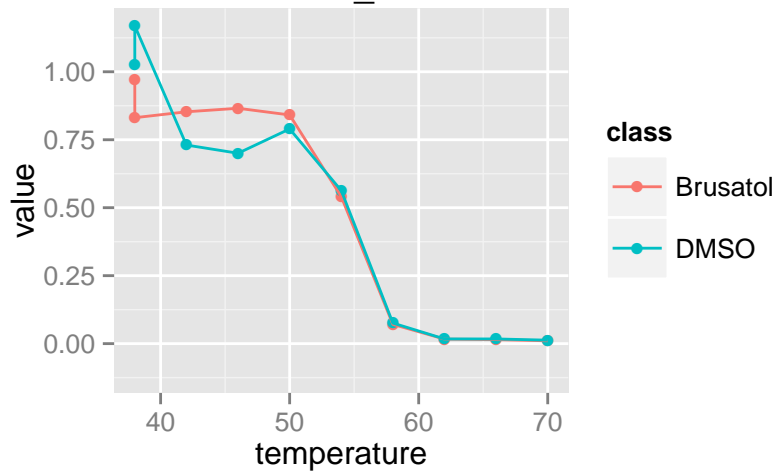

Prot: PLXB2\_HUMAN

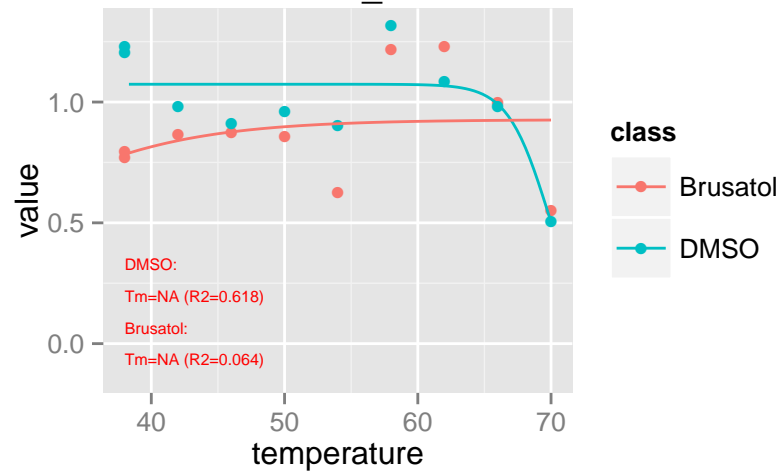

Prot: PM14\_HUMAN

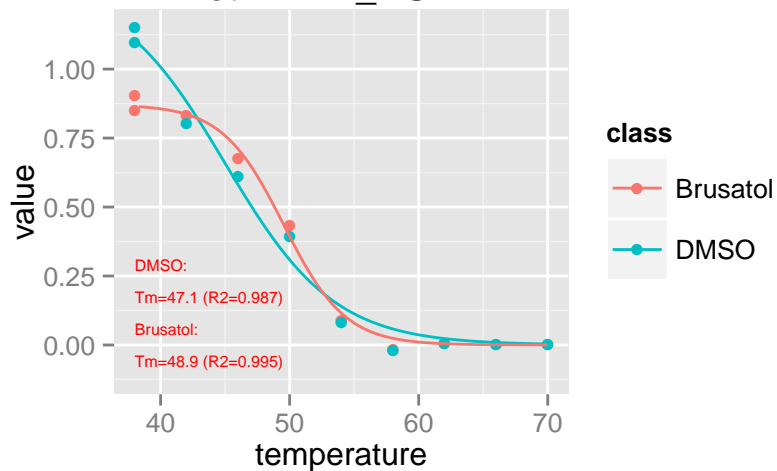

Prot: PMGE\_HUMAN

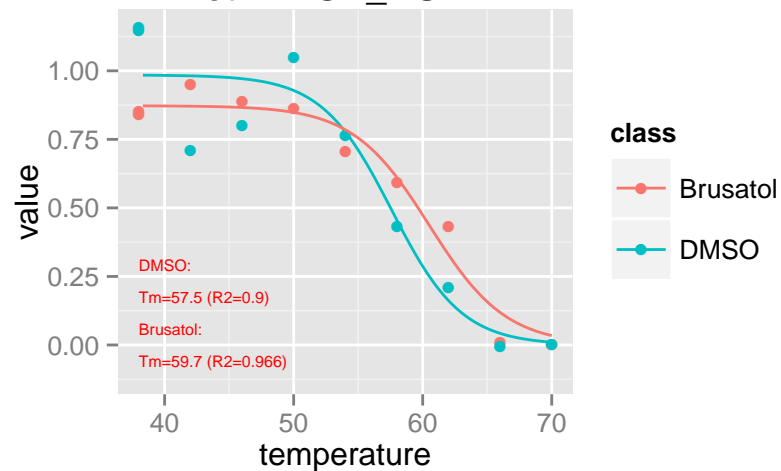

Prot: PML\_HUMAN

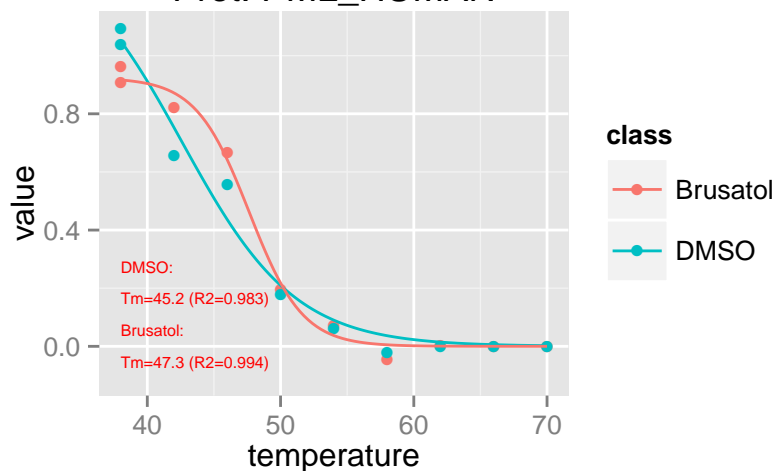

Prot: PMM2\_HUMAN

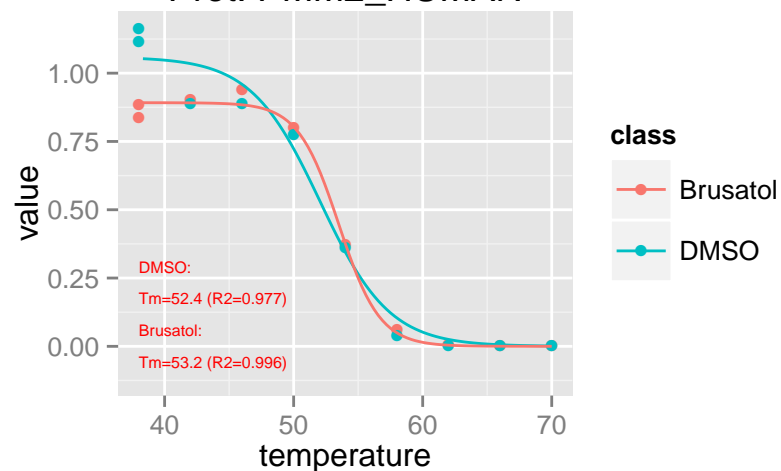



Prot: PMVK\_HUMAN

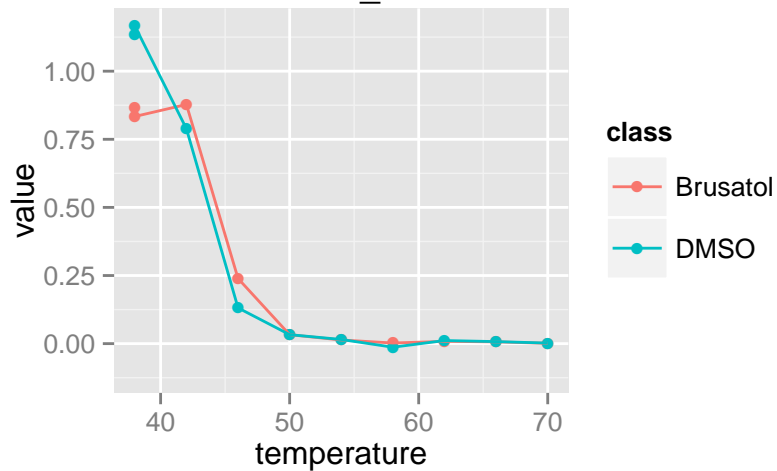

Prot: PNCB\_HUMAN

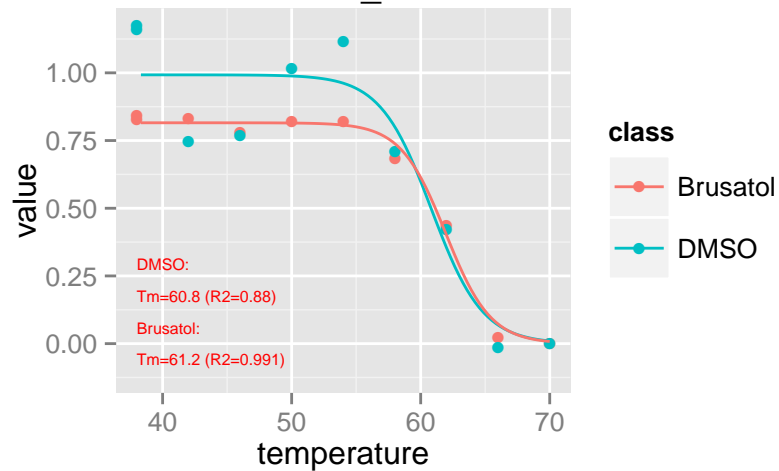

Prot: PNO1\_HUMAN

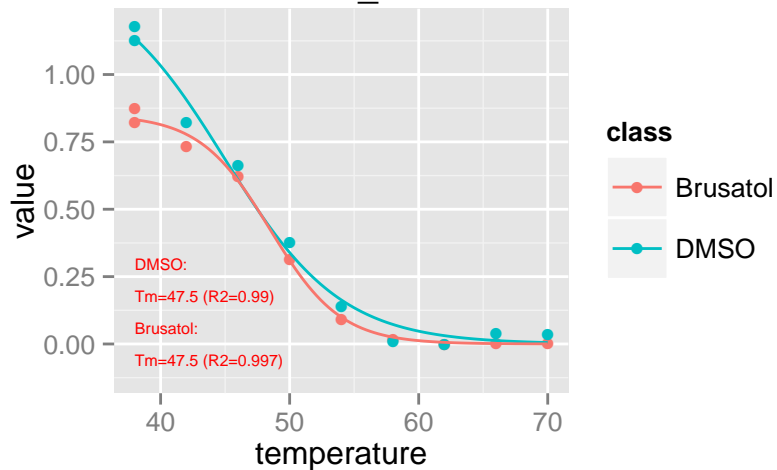

Prot: PNPB\_HUMAN

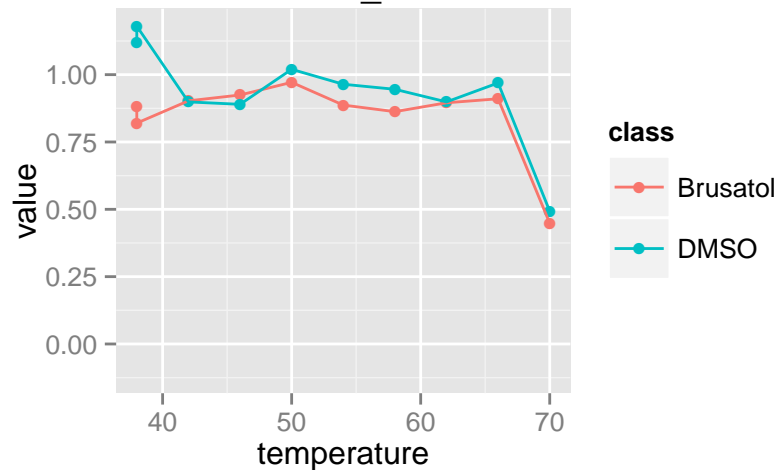

Prot: PNPO\_HUMAN

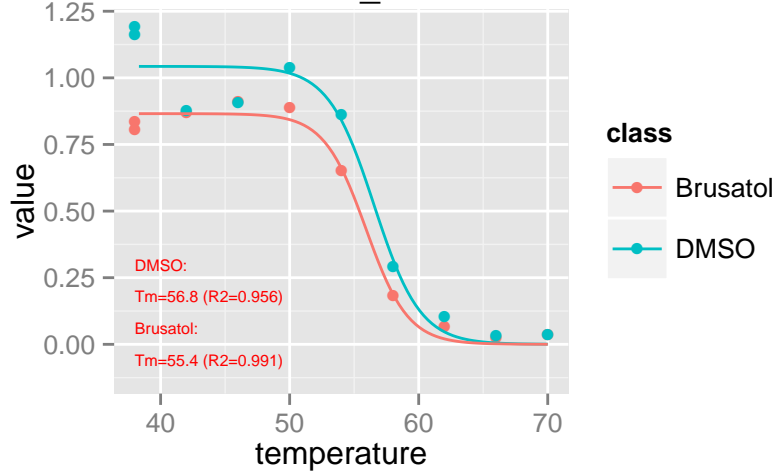

Prot: PNPT1\_HUMAN

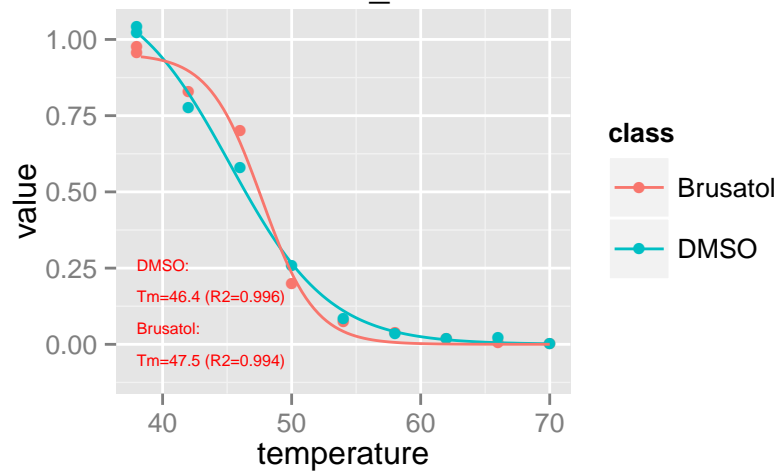

Prot: PODXL\_HUMAN

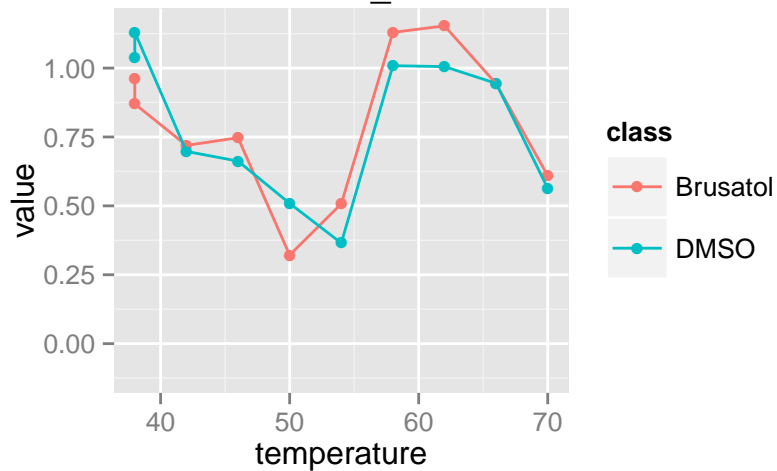

Prot: POF1B\_HUMAN

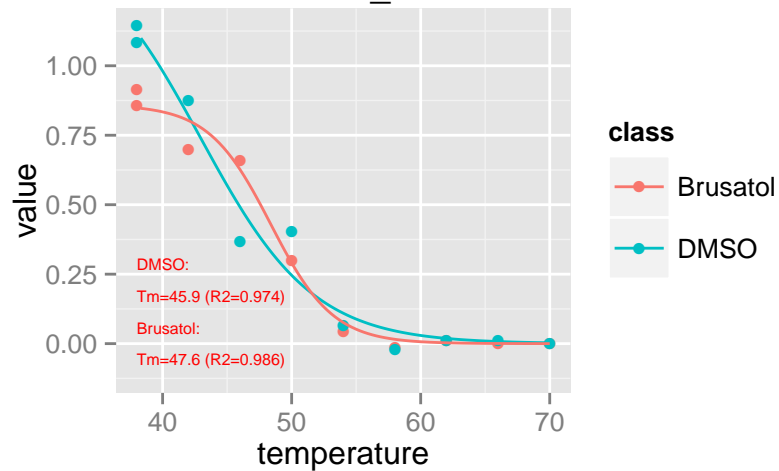

Prot: POMP\_HUMAN

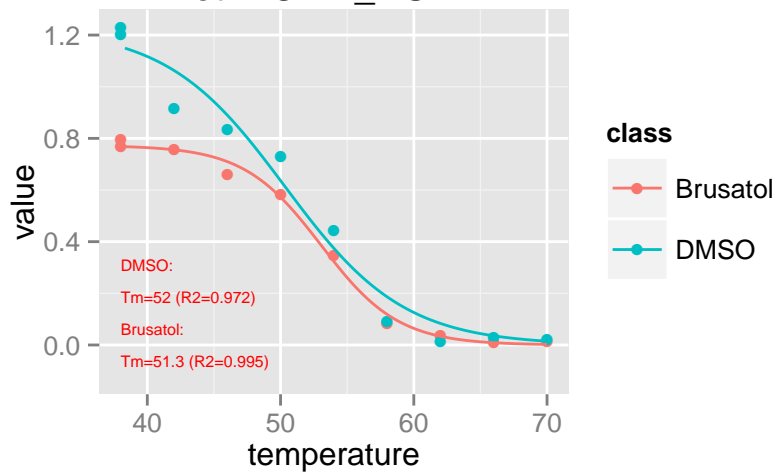

Prot: POP1\_HUMAN

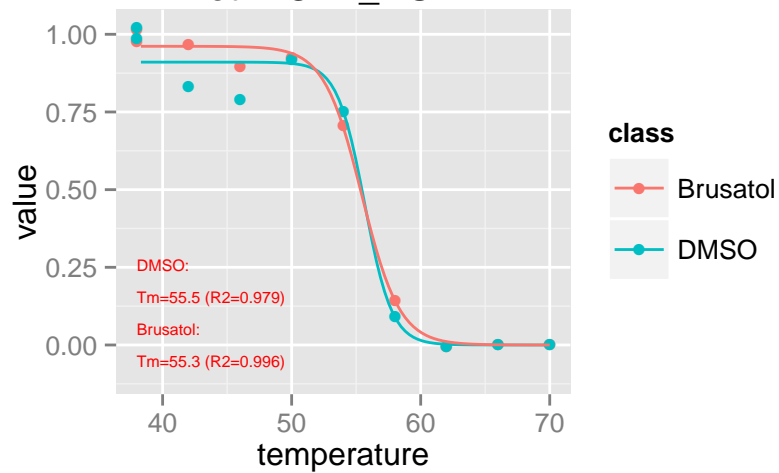

Prot: PP14A\_HUMAN

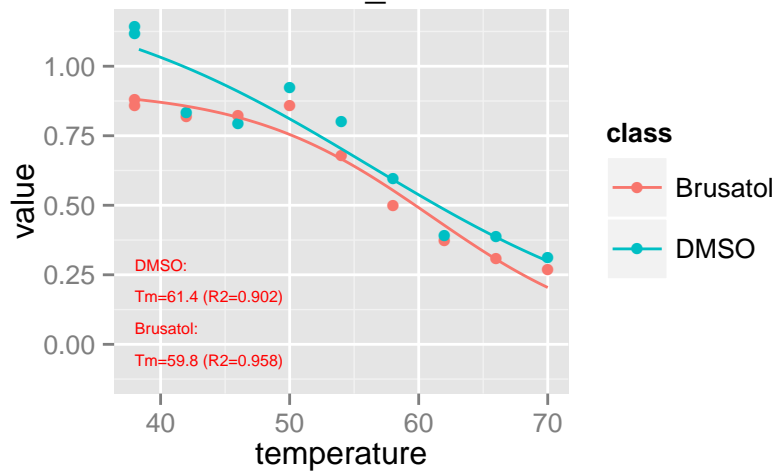

Prot: PP14B\_HUMAN

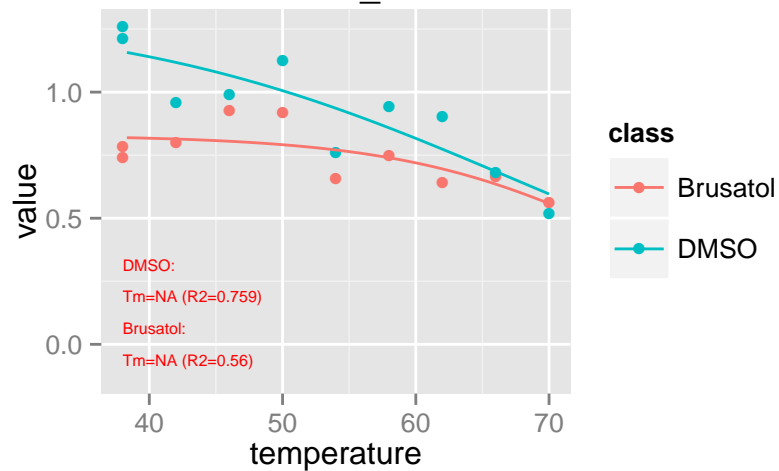

Prot: PP1A\_HUMAN

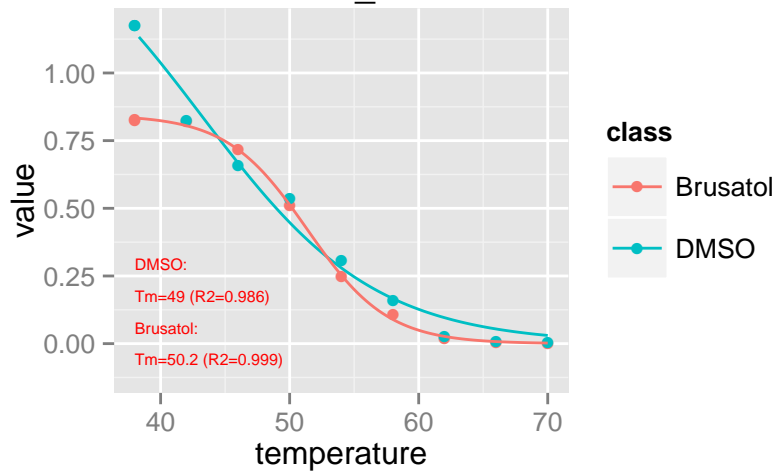

Prot: PP1B\_HUMAN

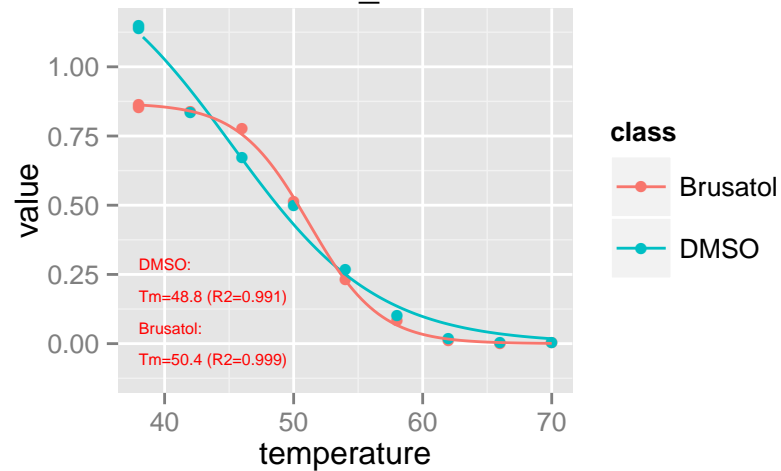

Prot: PP1G\_HUMAN

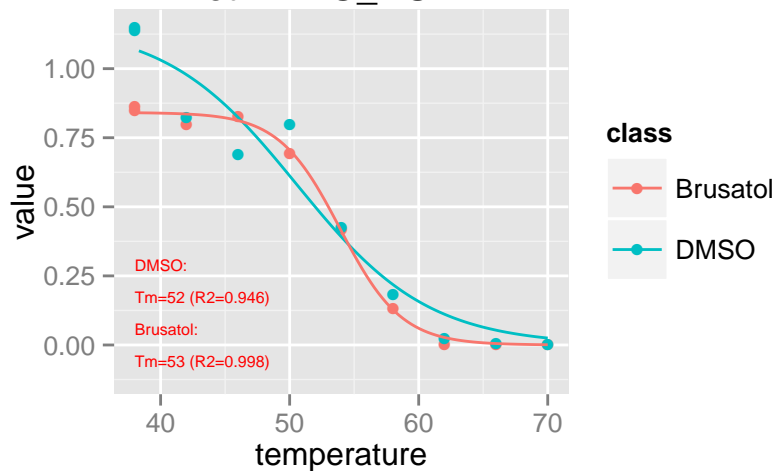

Prot: PP1R7\_HUMAN

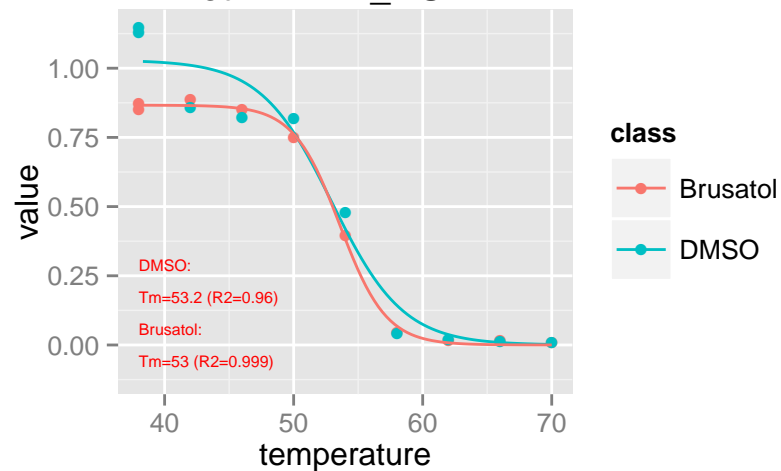

Prot: PP1R8\_HUMAN

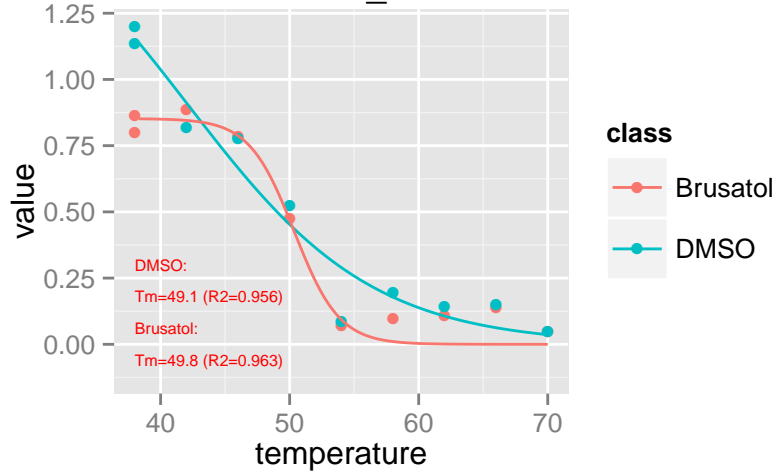

Prot: PP1RA\_HUMAN

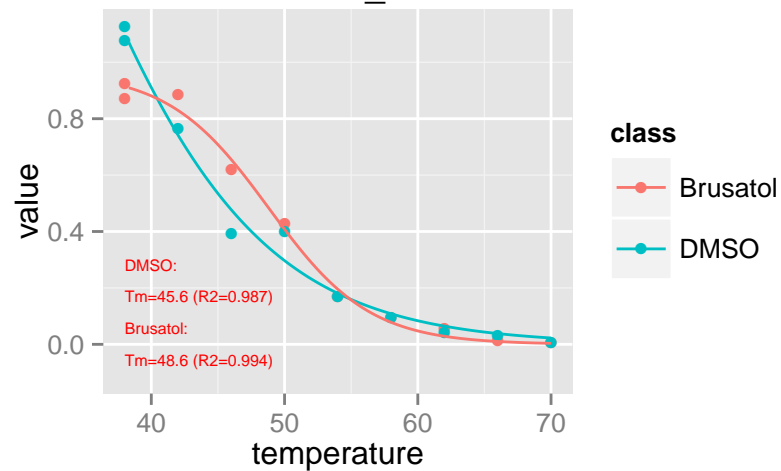

Prot: PP2AA\_HUMAN

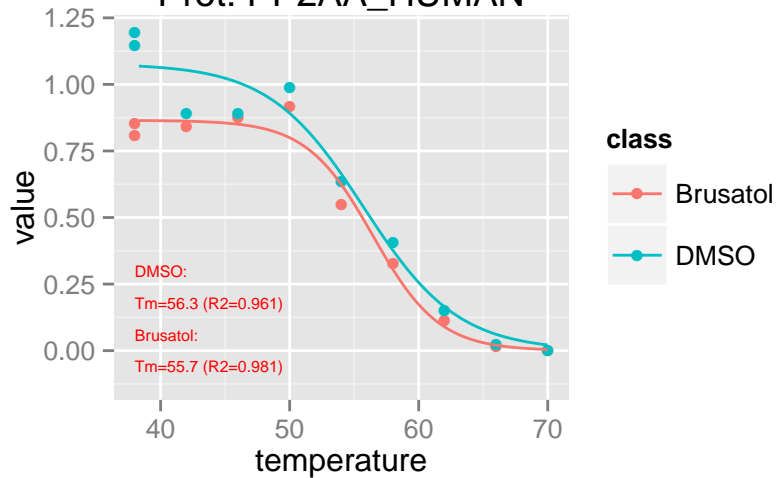

Prot: PP2AB\_HUMAN

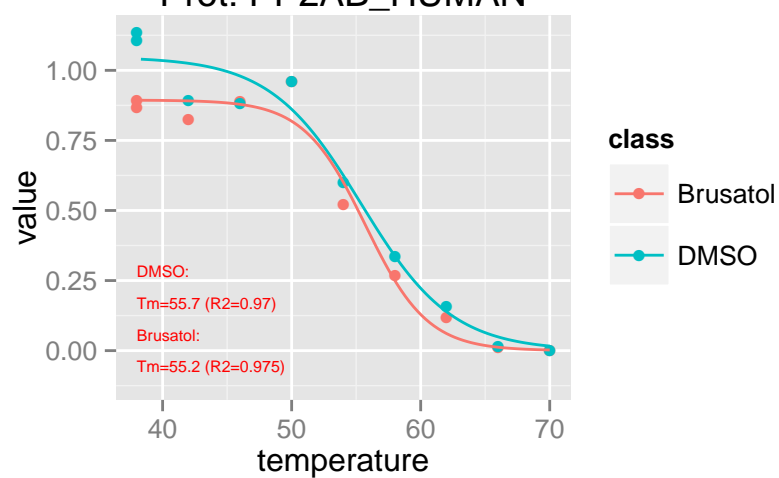

Prot: PP2BA\_HUMAN

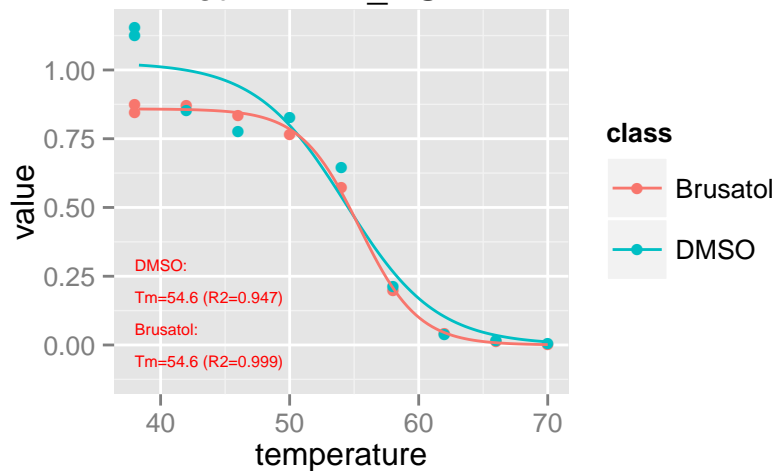

Prot: PP4C\_HUMAN

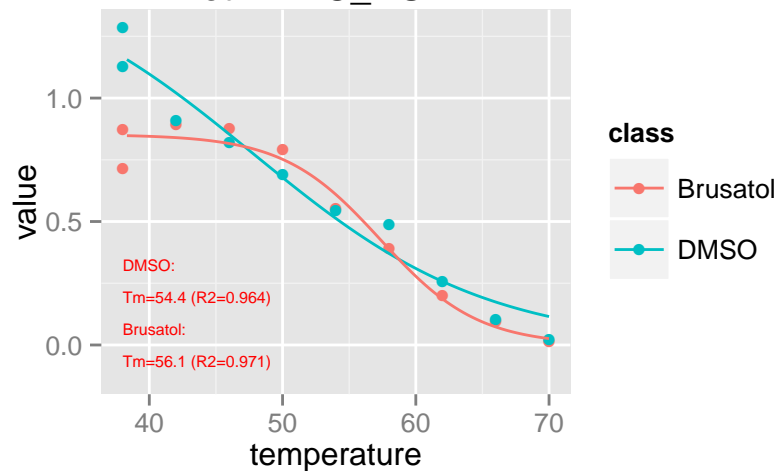

Prot: PP4R1\_HUMAN

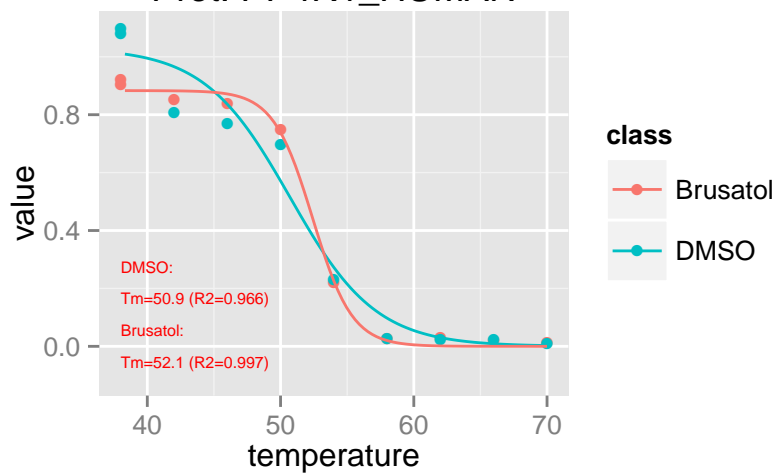

Prot: PP4R2\_HUMAN

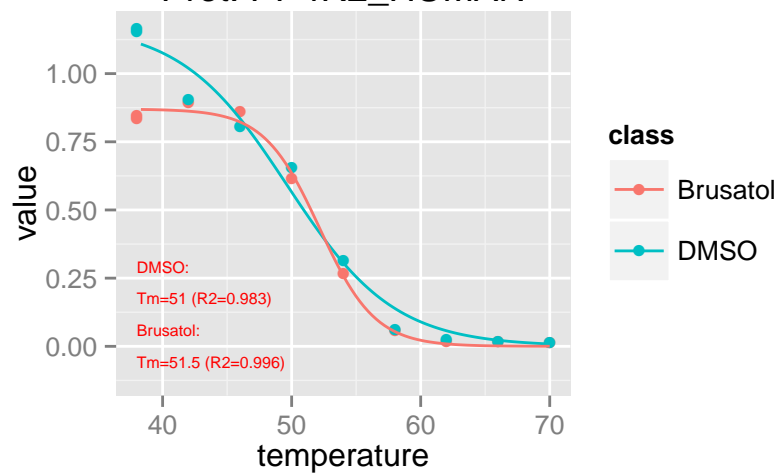

Prot: PP6R1\_HUMAN

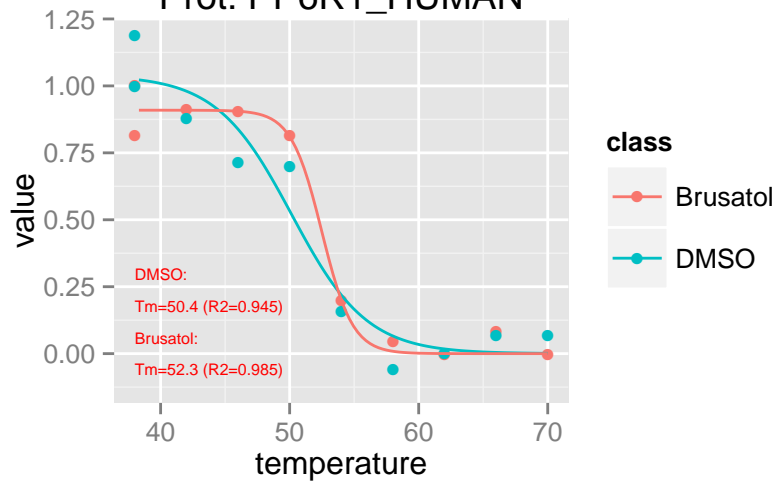

Prot: PP6R3\_HUMAN

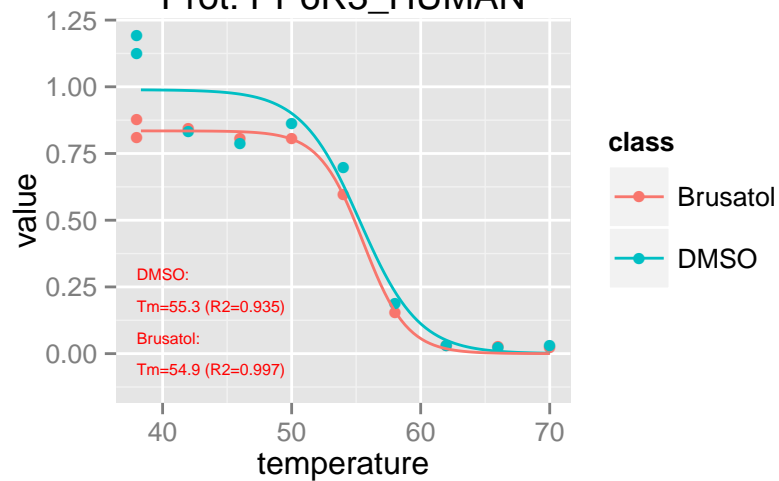

Prot: PPAC\_HUMAN

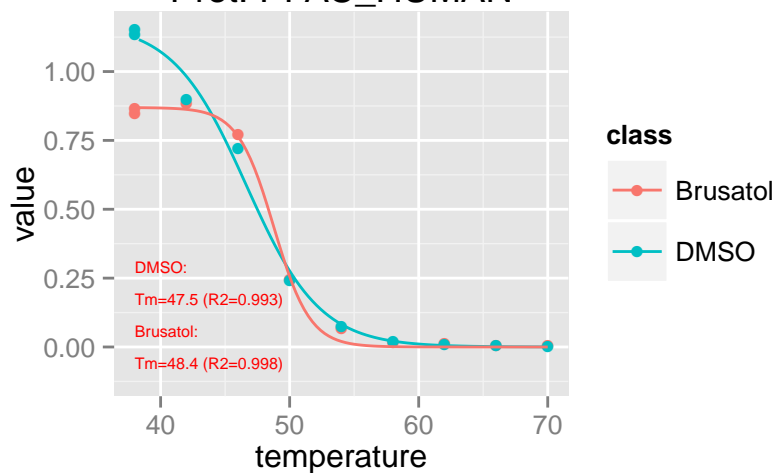

Prot: PPAL\_HUMAN

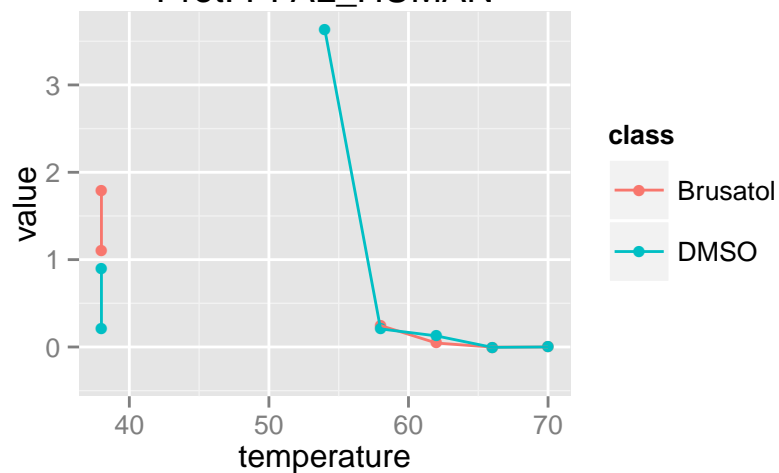

Prot: PPCE\_HUMAN

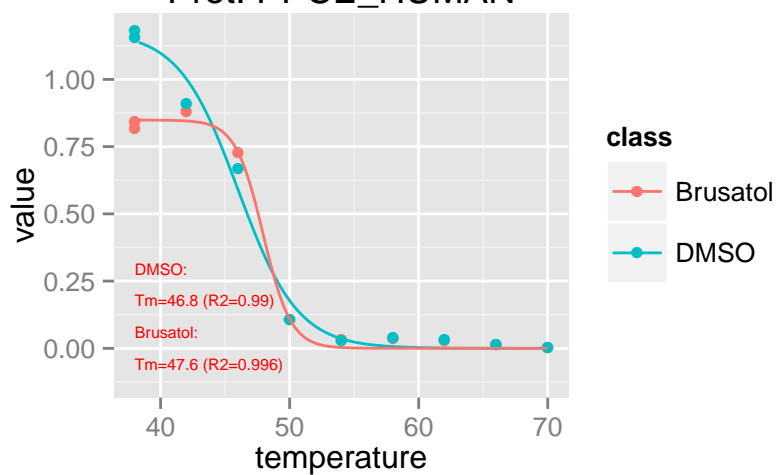

Prot: PPCEL\_HUMAN

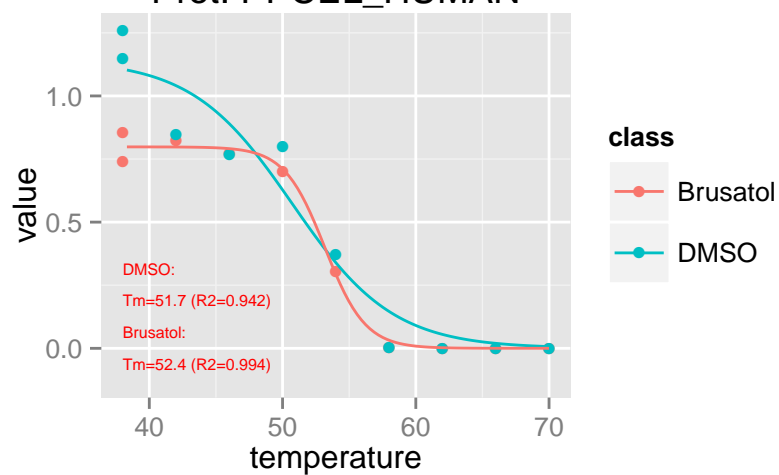

Prot: PPCS\_HUMAN

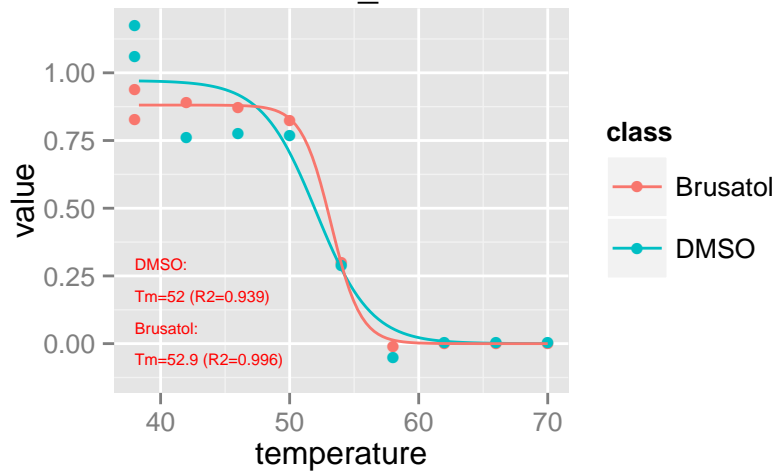

Prot: PPCT\_HUMAN

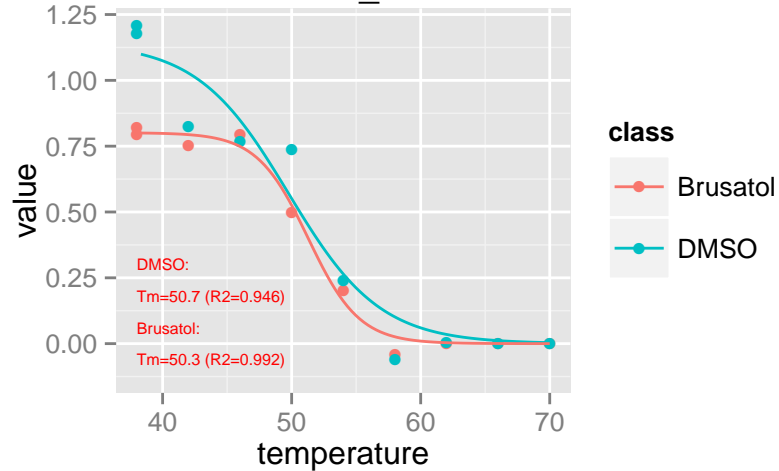

Prot: PPGB\_HUMAN

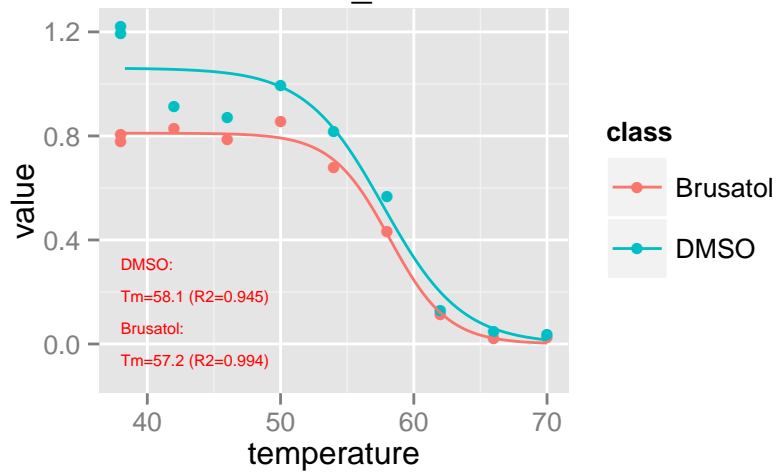

Prot: PPIA\_HUMAN

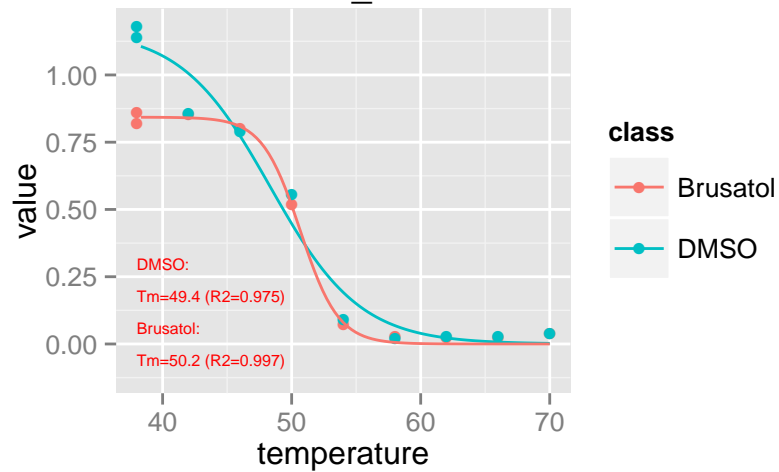

Prot: PPIB\_HUMAN

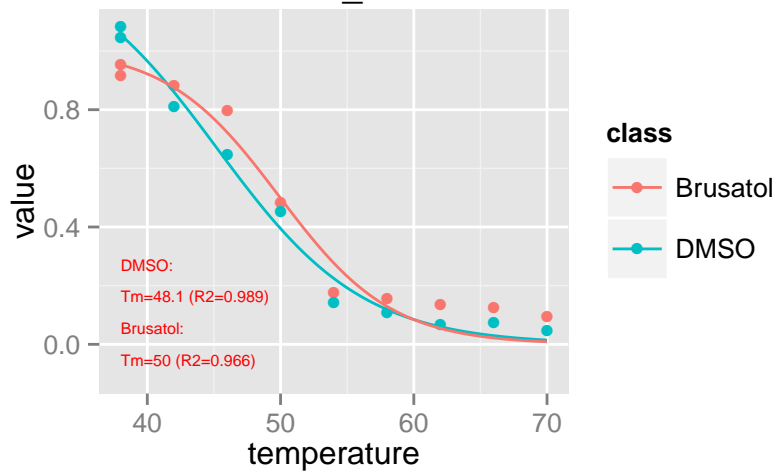

Prot: PPID\_HUMAN

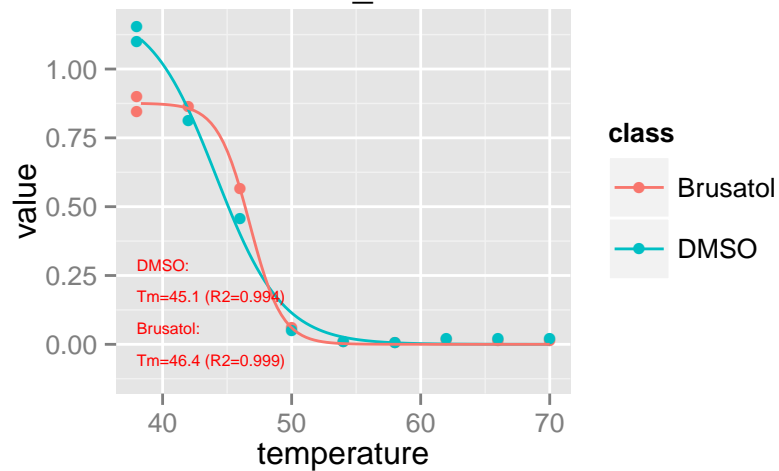

Prot: PPIE\_HUMAN

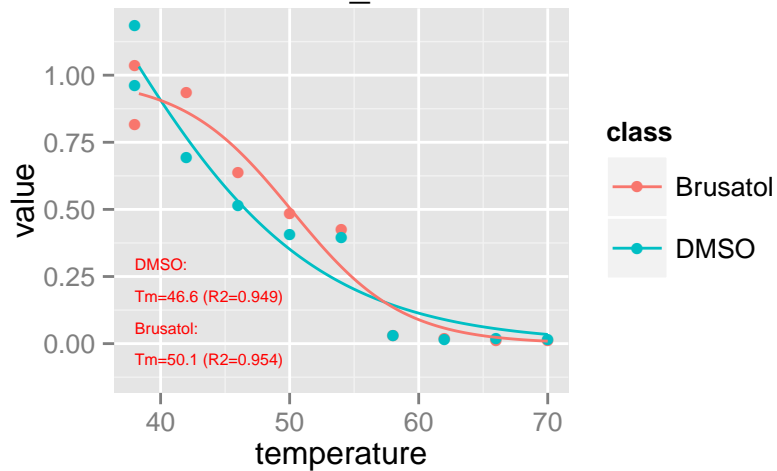

Prot: PPIF\_HUMAN

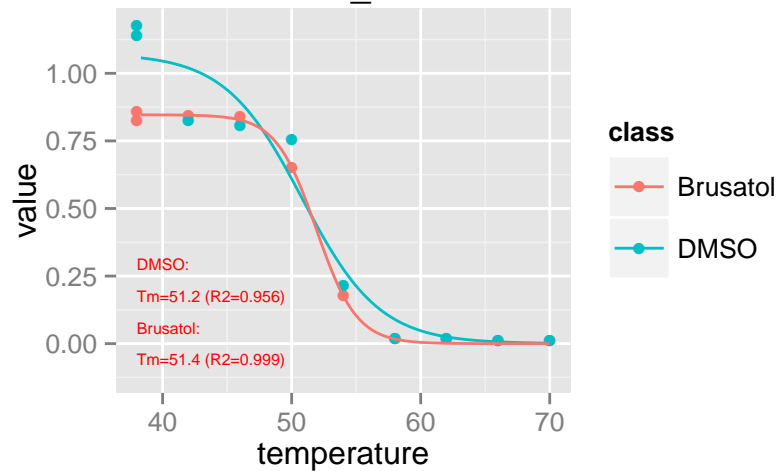

Prot: PPIL1\_HUMAN

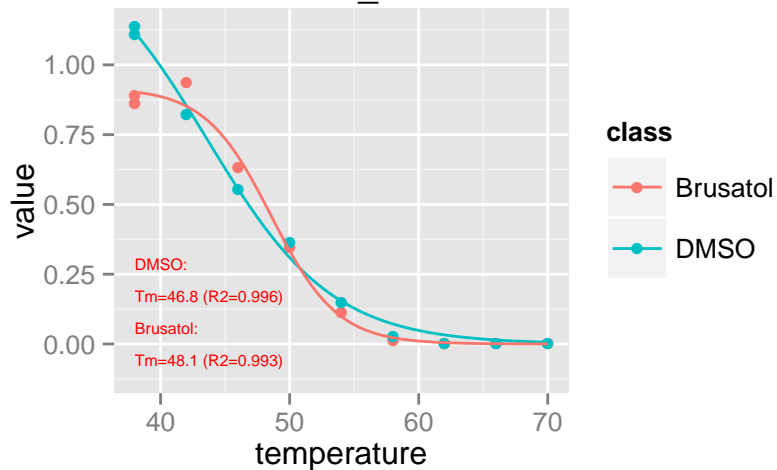

Prot: PPIL3\_HUMAN

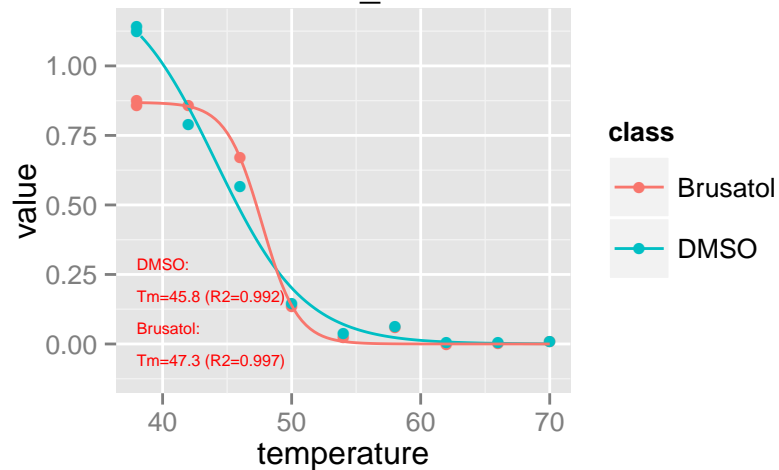

Prot: PPIL4\_HUMAN

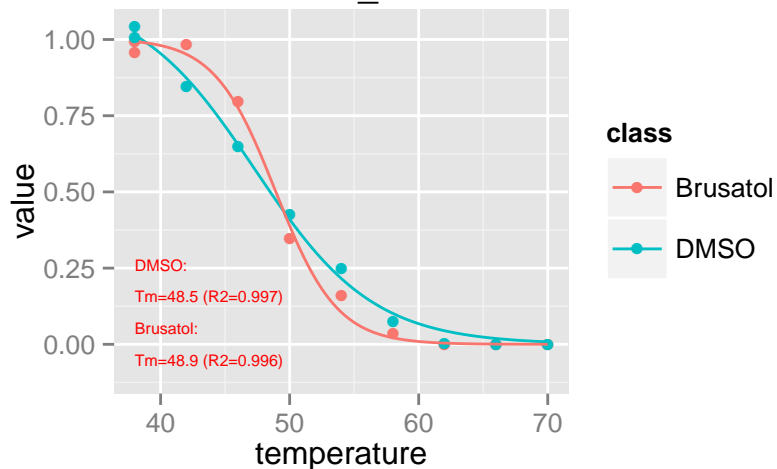

Prot: PPM1A\_HUMAN

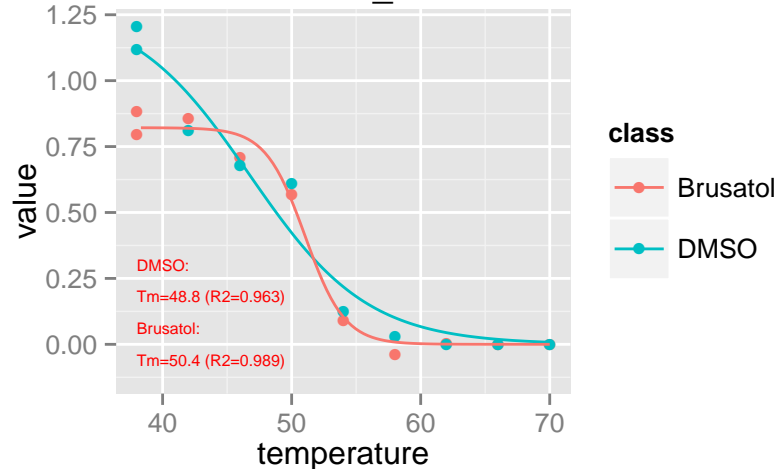

Prot: PPM1B\_HUMAN

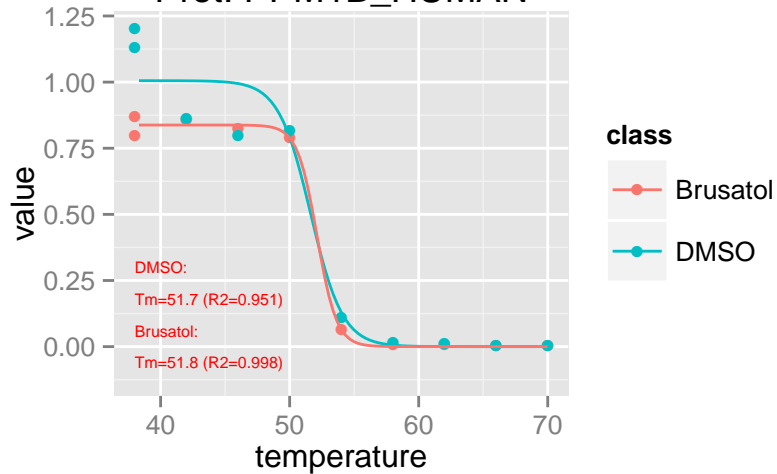

Prot: PPM1F\_HUMAN

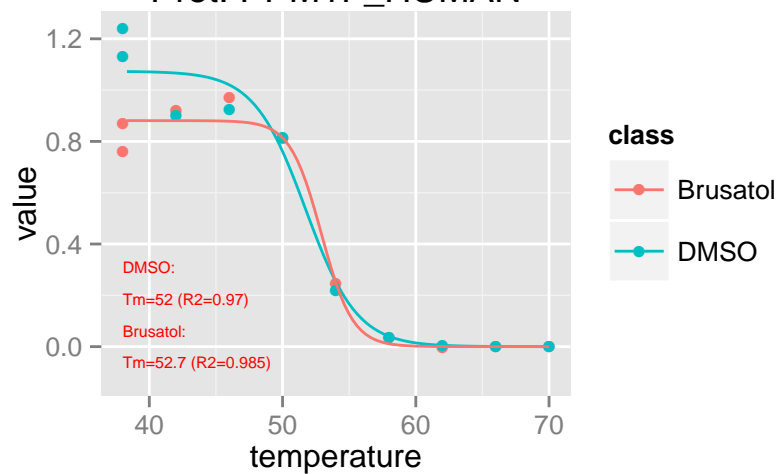

Prot: PPM1G\_HUMAN

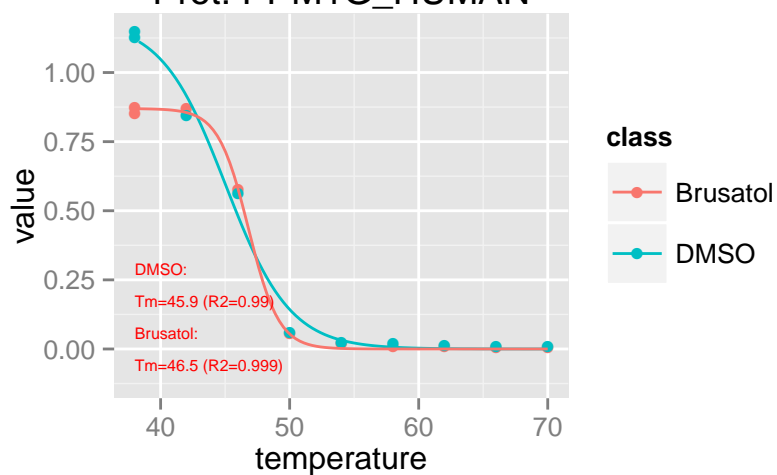

Prot: PPME1\_HUMAN

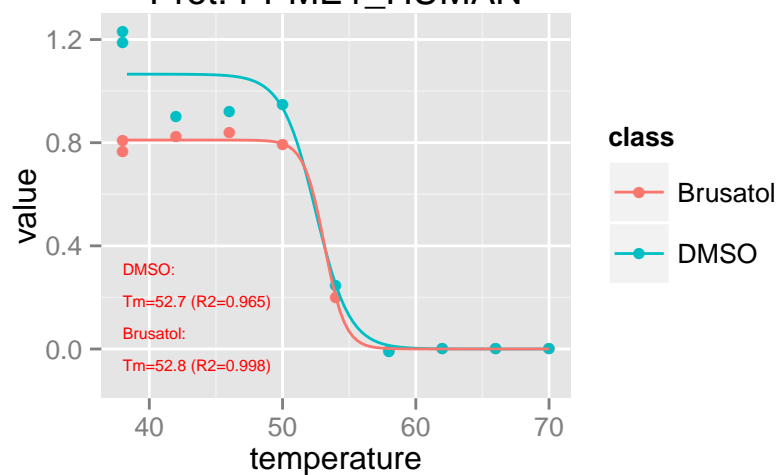

Prot: PPP5\_HUMAN

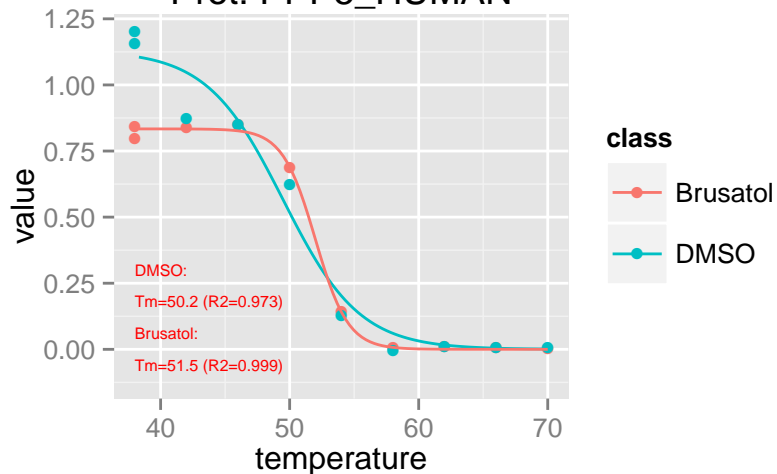

Prot: PPP6\_HUMAN

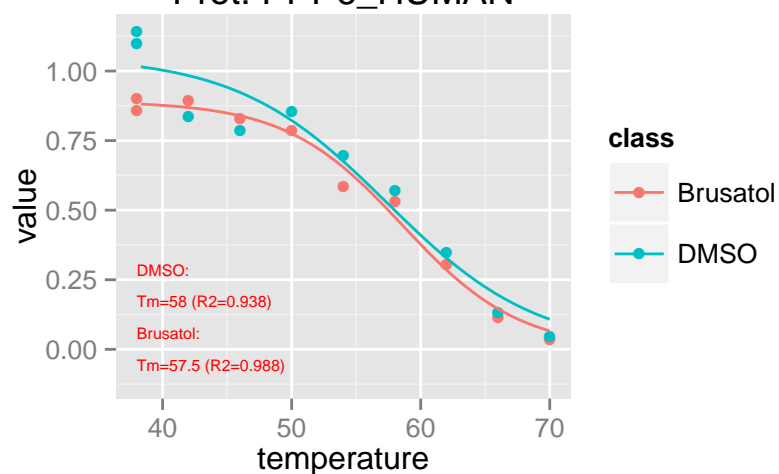



Prot: PPR21\_HUMAN

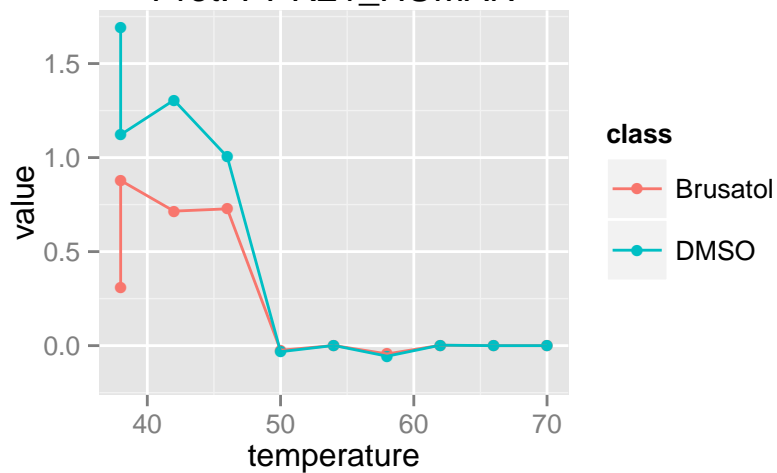

Prot: PPT1\_HUMAN

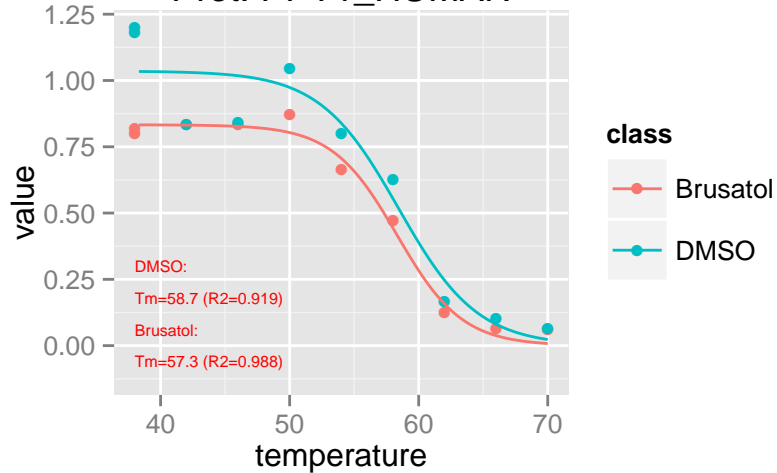

Prot: PPWD1\_HUMAN

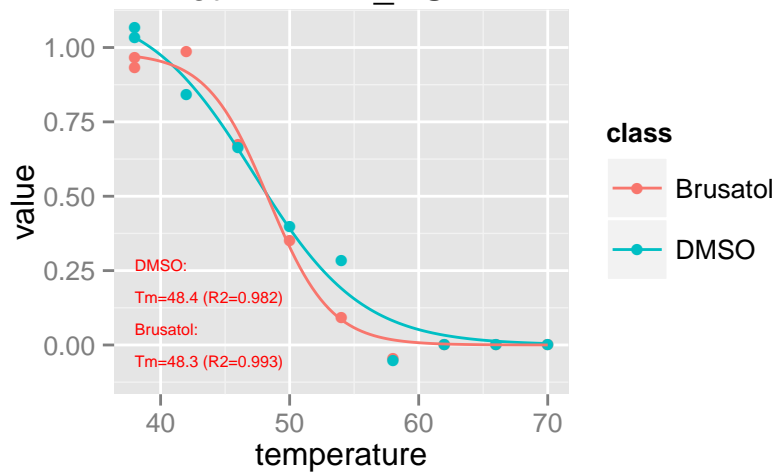

Prot: PQBP1\_HUMAN

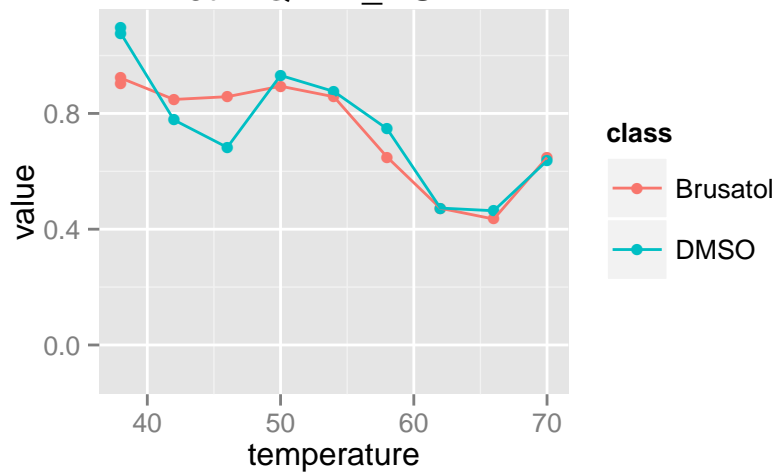

Prot: PR40A\_HUMAN

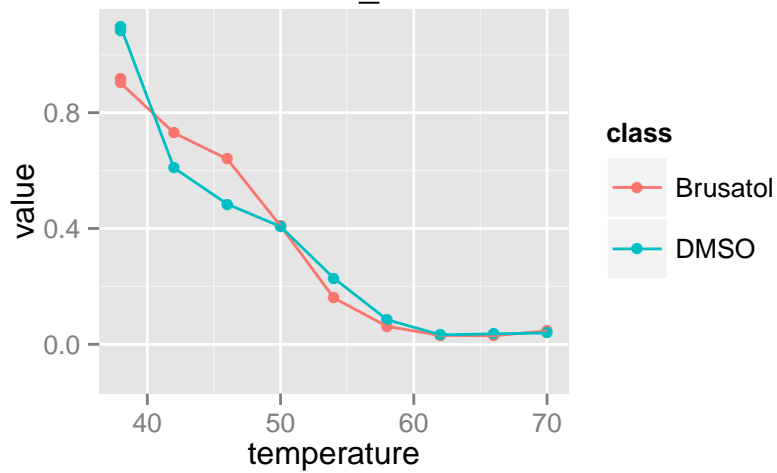

Prot: PRC1\_HUMAN

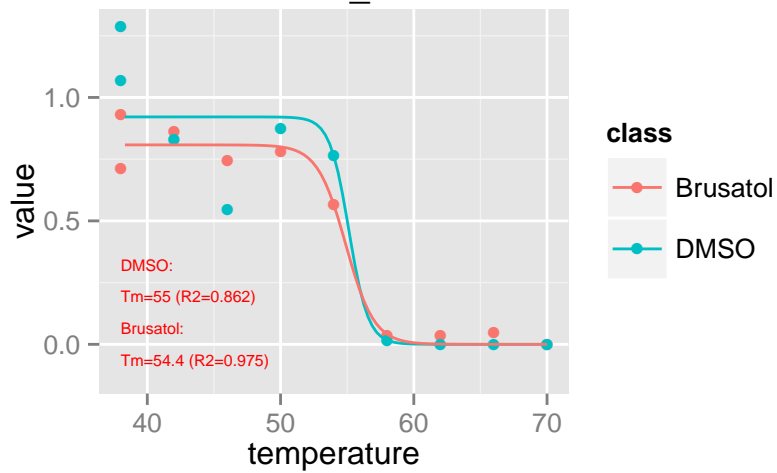

Prot: PRC2A\_HUMAN

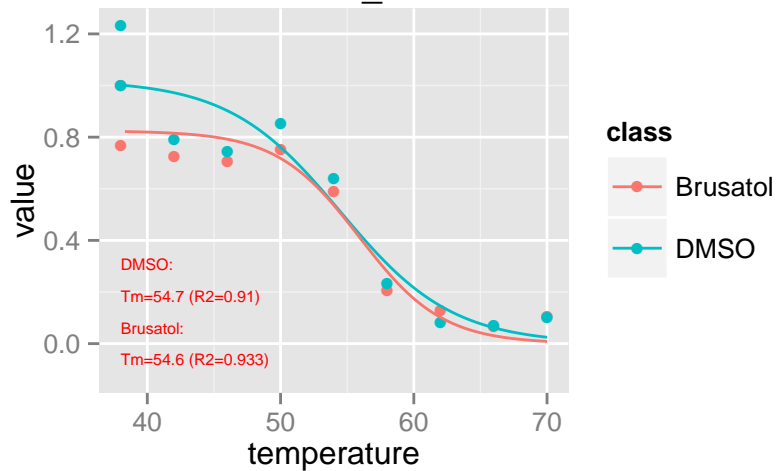

Prot: PRC2B\_HUMAN

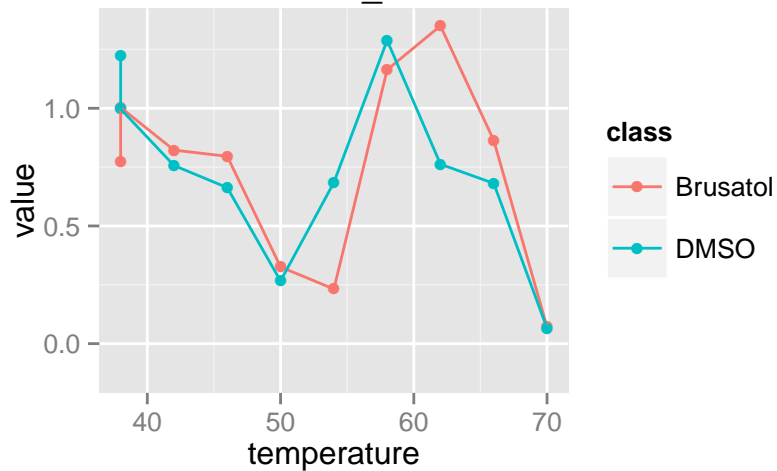

Prot: PRC2C\_HUMAN

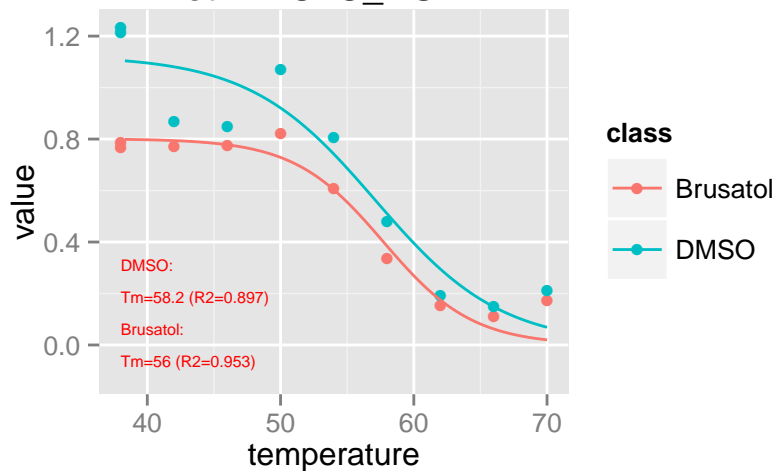

Prot: PRCC\_HUMAN

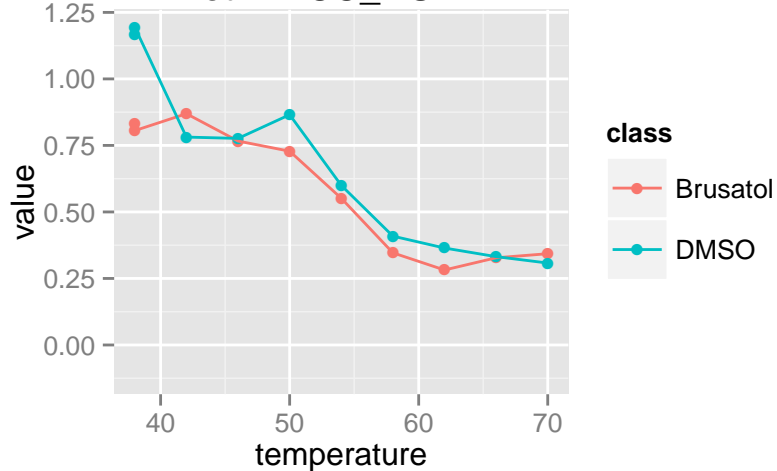

Prot: PRCM\_HUMAN

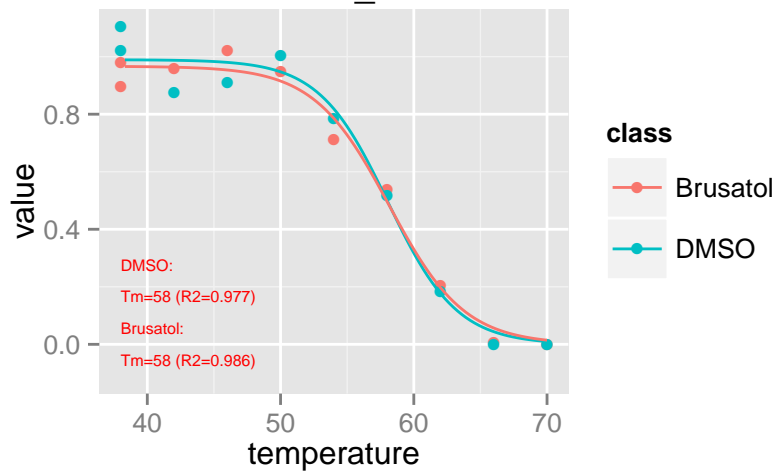

Prot: PRDC1\_HUMAN

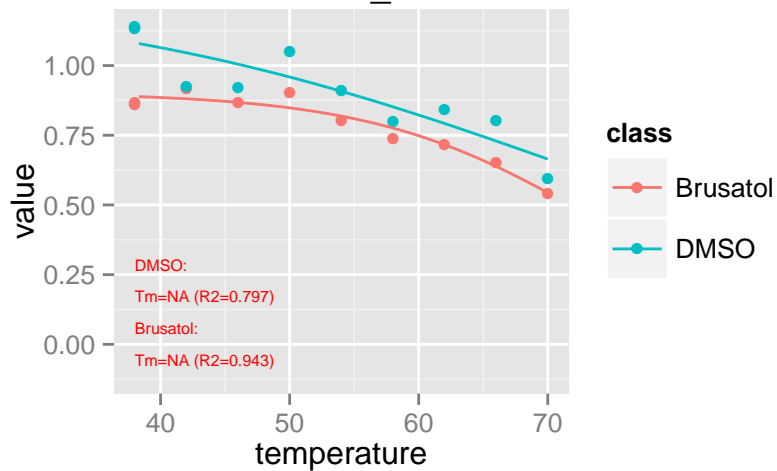

Prot: PRDX1\_HUMAN

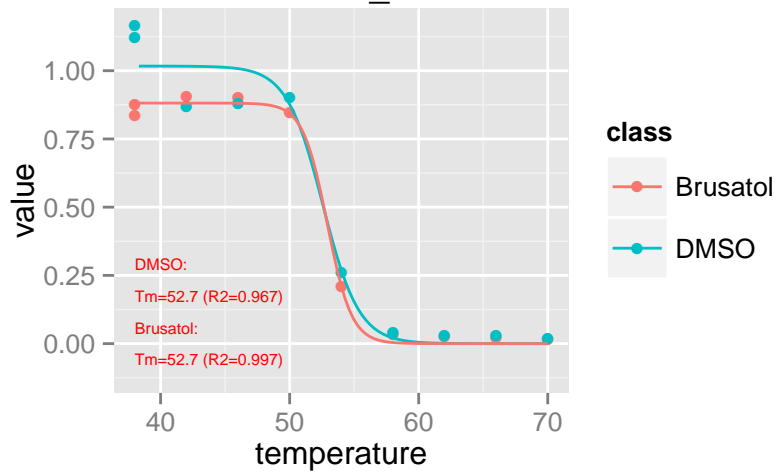

Prot: PRDX3\_HUMAN

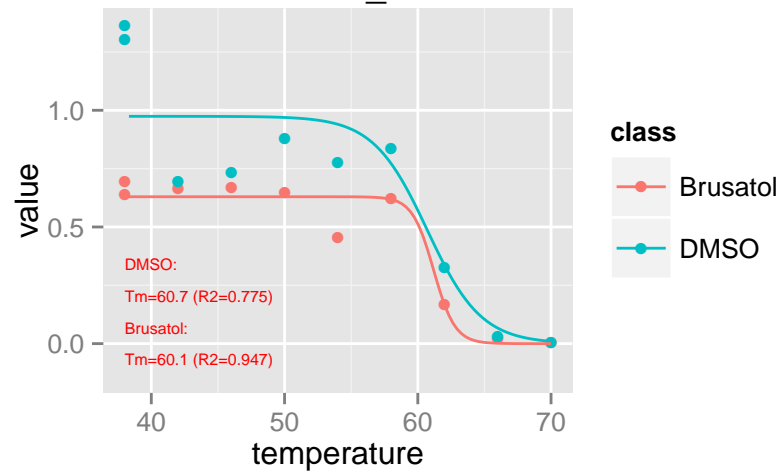

Prot: PRDX4\_HUMAN

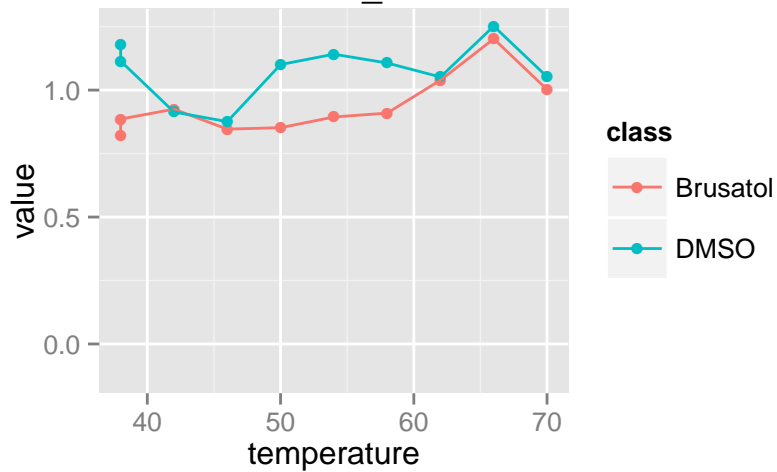

Prot: PRDX5\_HUMAN

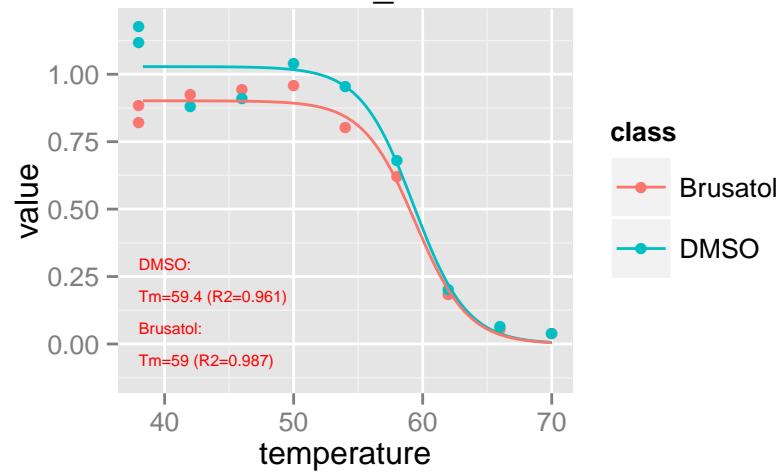

Prot: PRDX6\_HUMAN

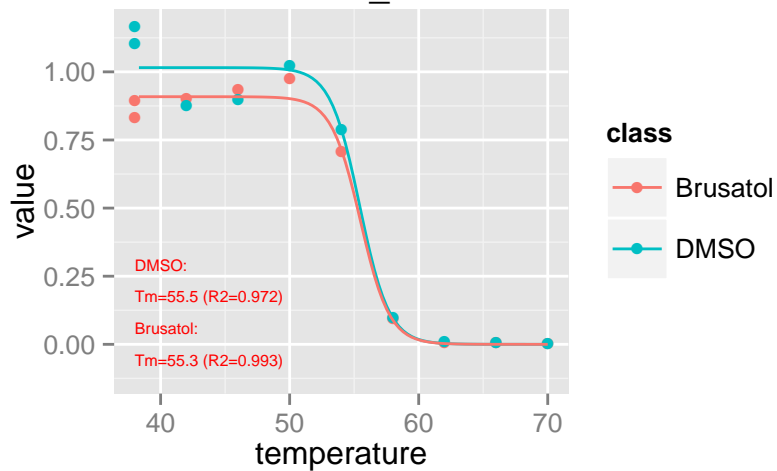

Prot: PREP\_HUMAN

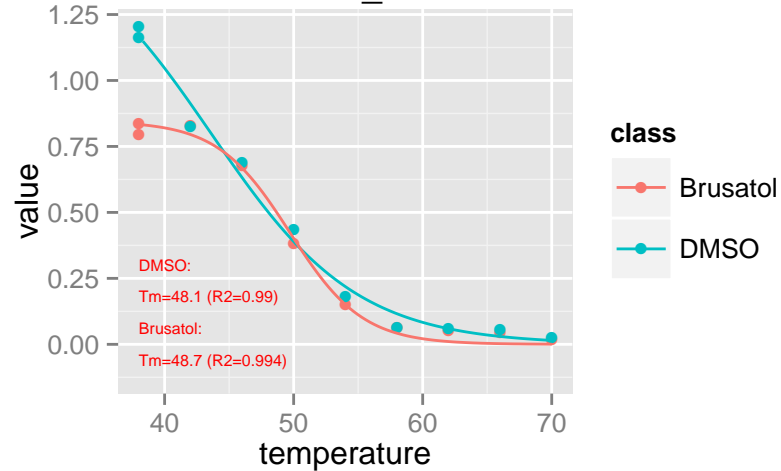

Prot: PRI1\_HUMAN

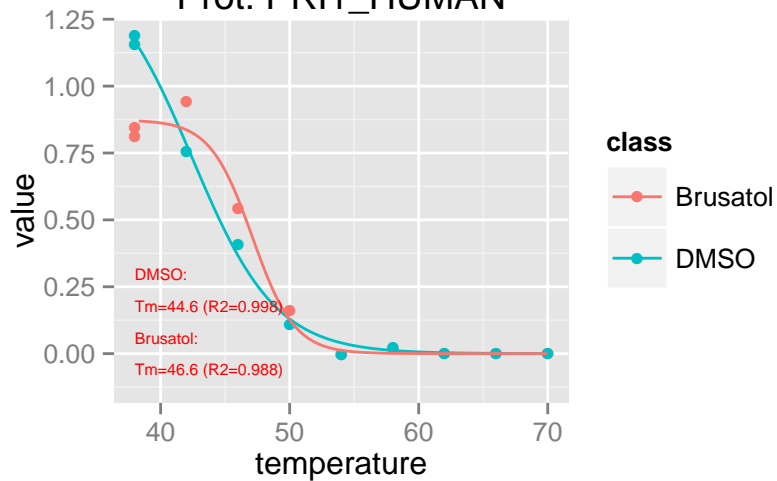

Prot: PRI2\_HUMAN

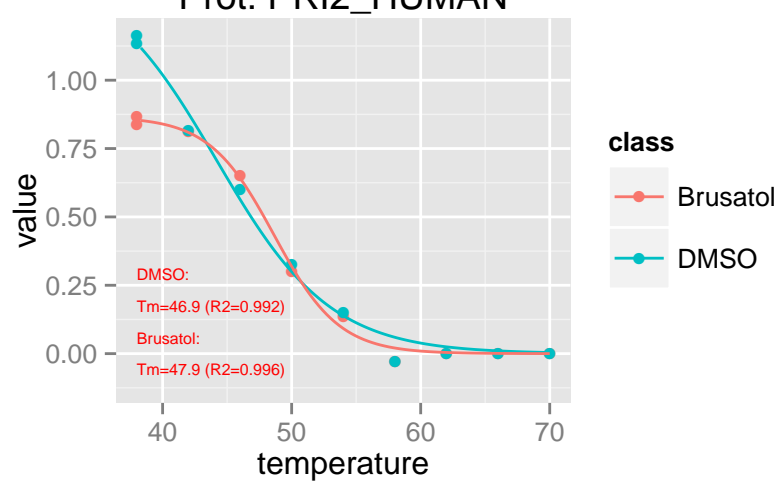

Prot: PRIO\_HUMAN

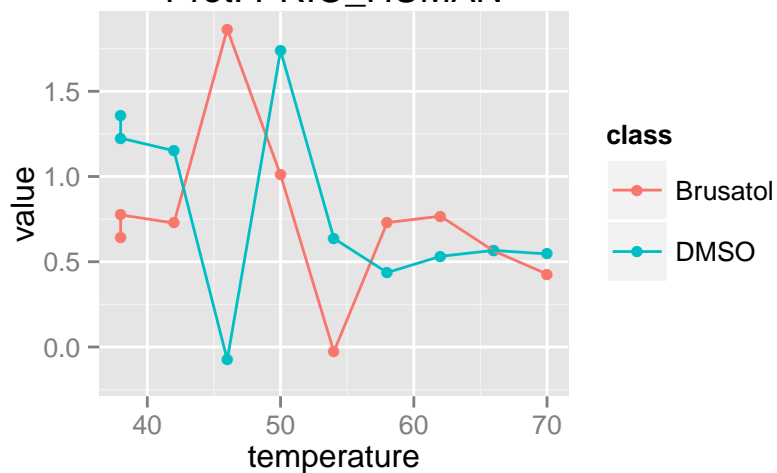

Prot: PRKDC\_HUMAN

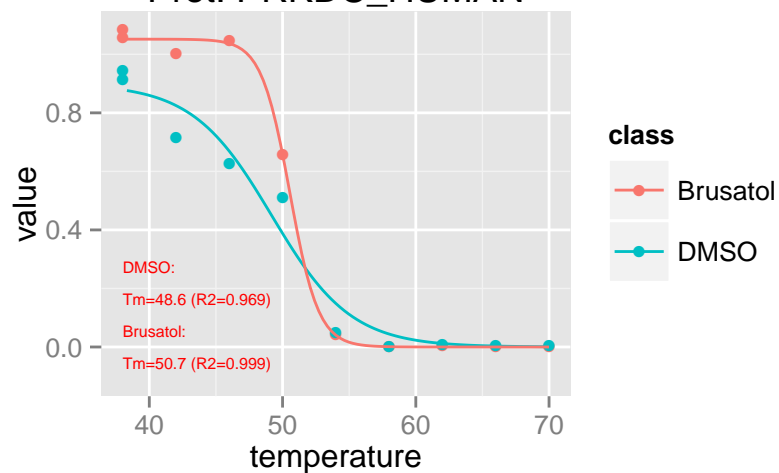

Prot: PROF1\_HUMAN

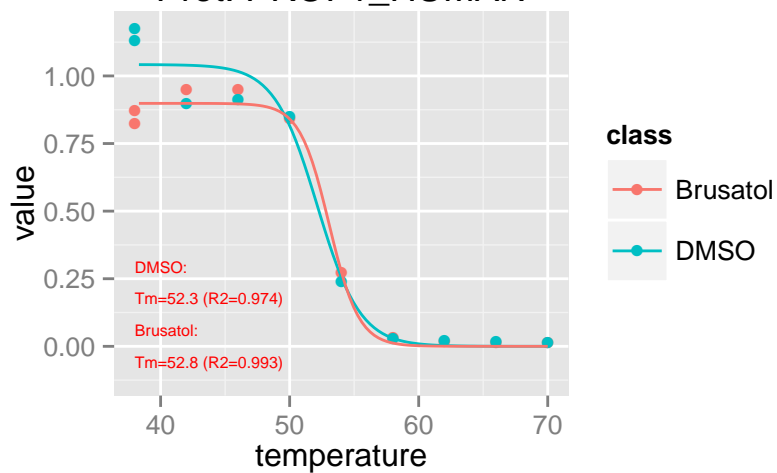

Prot: PROF2\_HUMAN

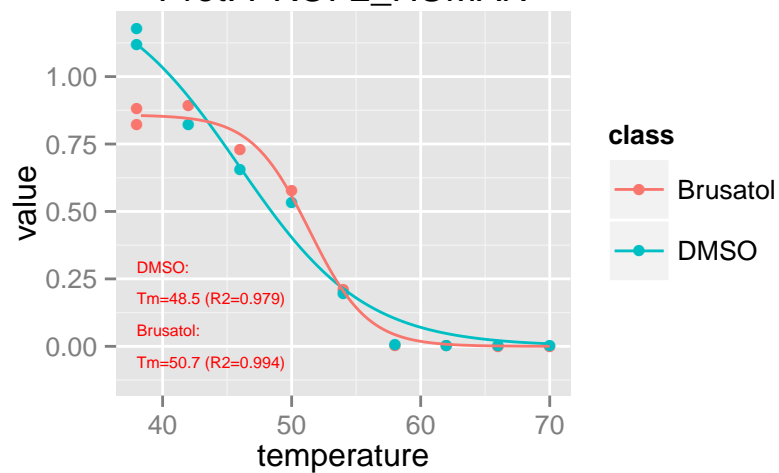

Prot: PROSC\_HUMAN

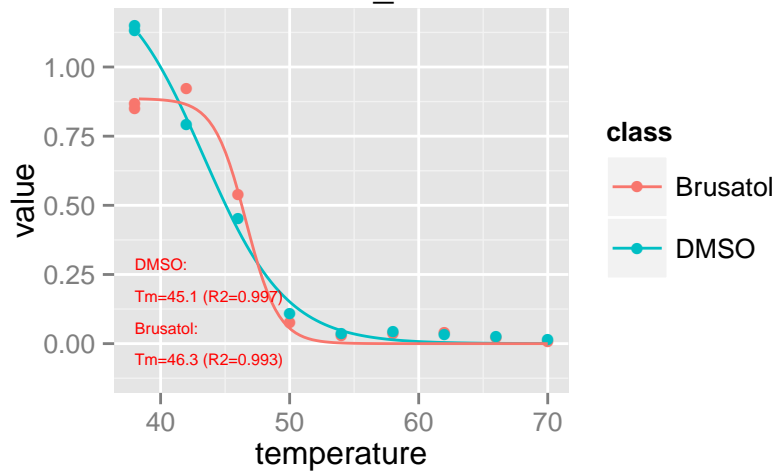

Prot: PRP16\_HUMAN

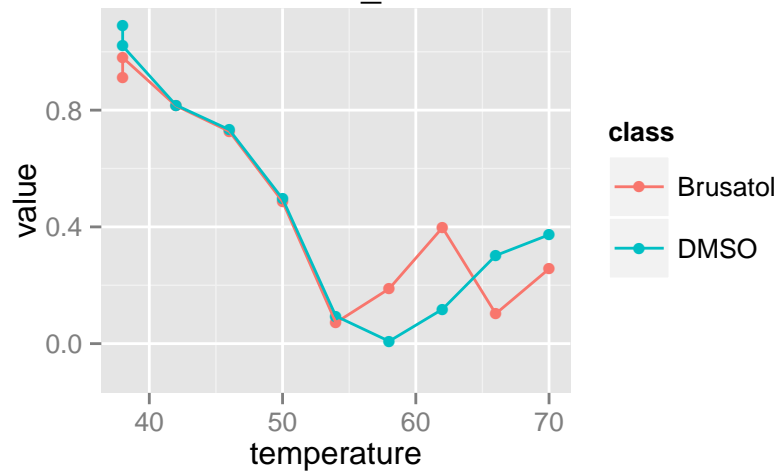

Prot: PRP19\_HUMAN

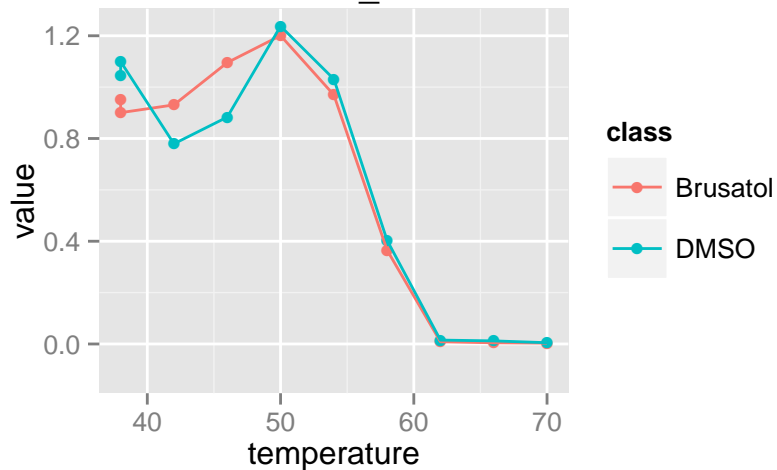

Prot: PRP31\_HUMAN

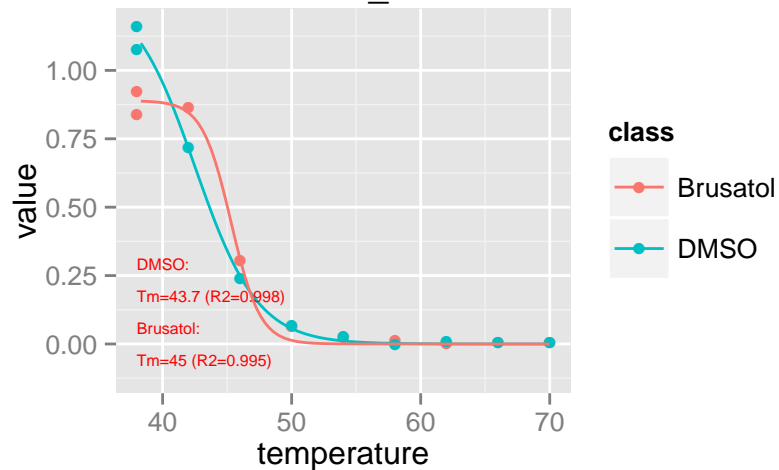

Prot: PRP4\_HUMAN

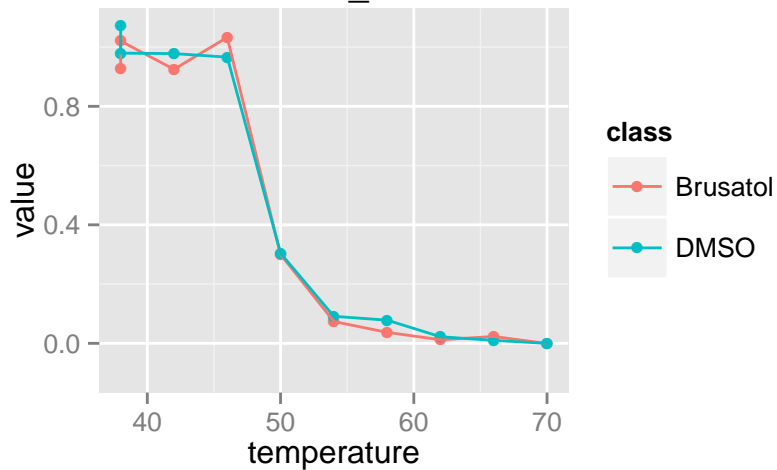

Prot: PRP8\_HUMAN

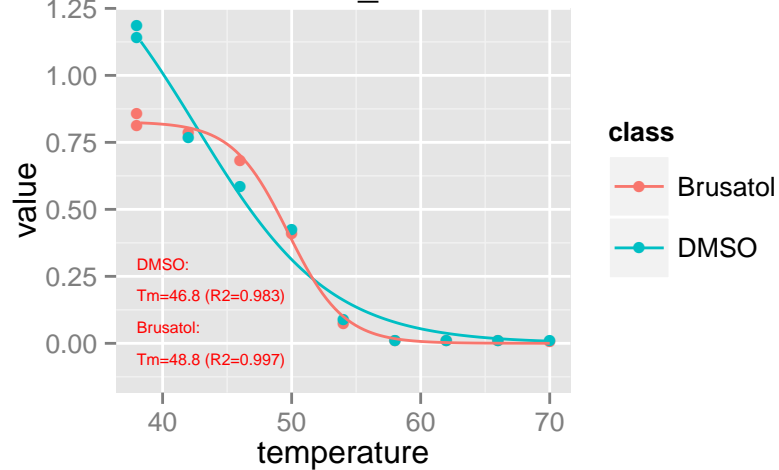

Prot: PRPF3\_HUMAN

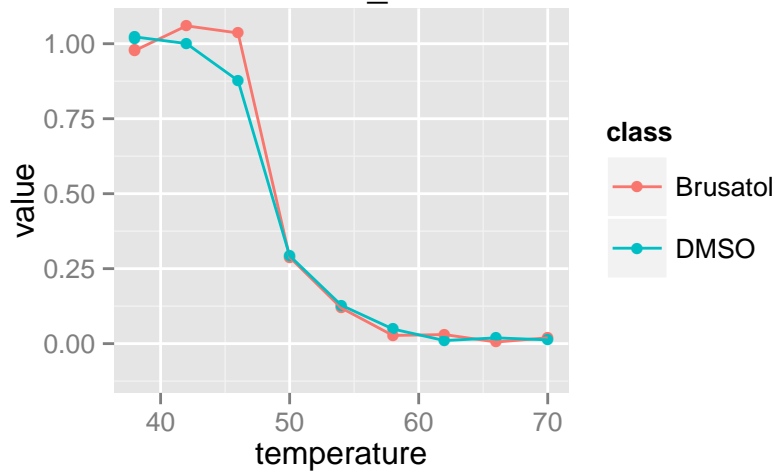

Prot: PRPK\_HUMAN

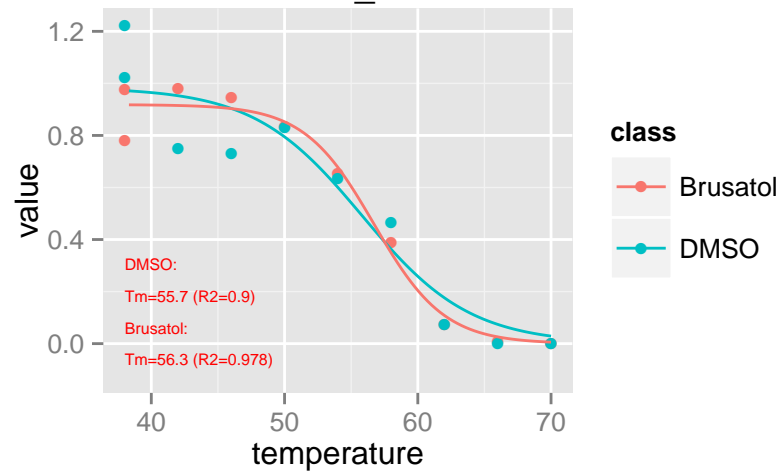

Prot: PRPS1\_HUMAN

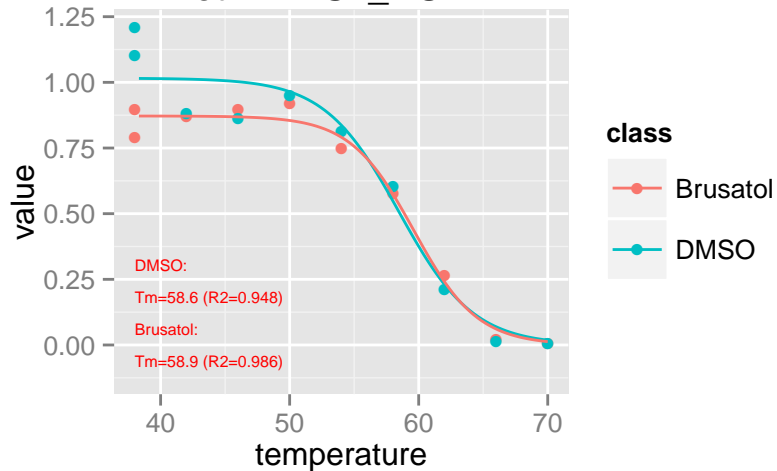

Prot: PRPS2\_HUMAN

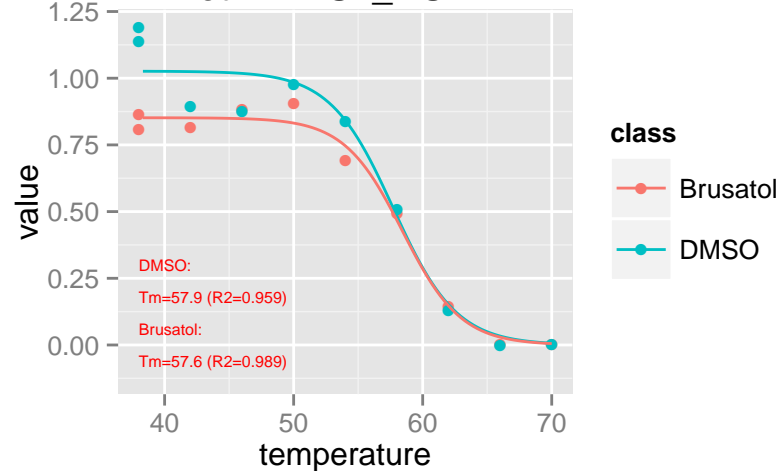

Prot: PRRC1\_HUMAN

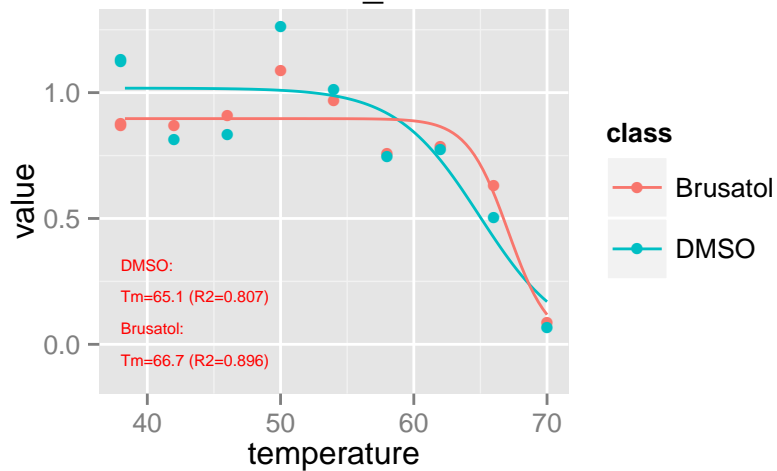

Prot: PRS10\_HUMAN

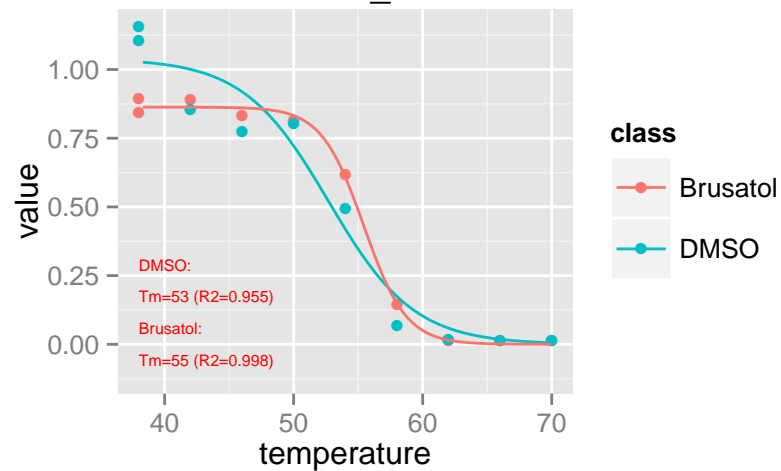

Prot: PRS4\_HUMAN

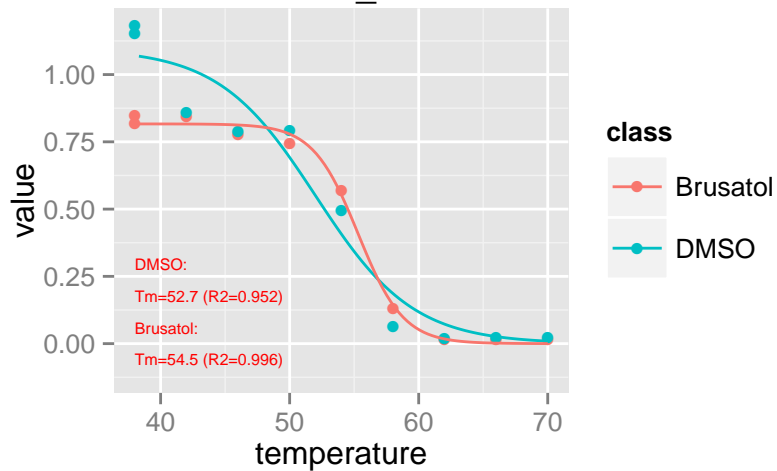

Prot: PRS6A\_HUMAN

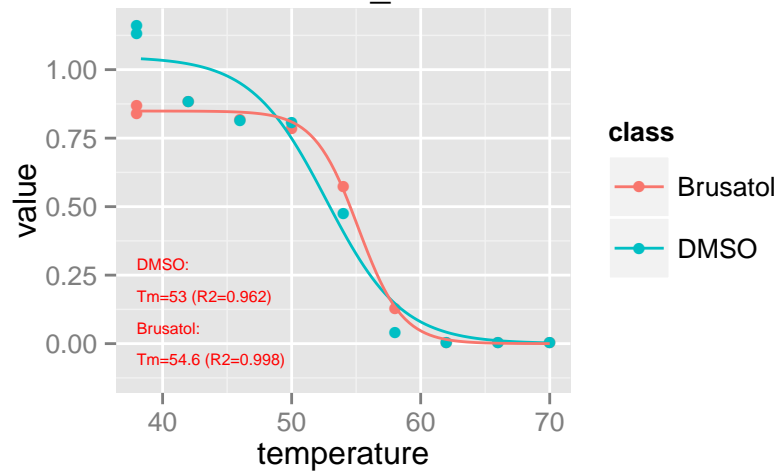

Prot: PRS6B\_HUMAN

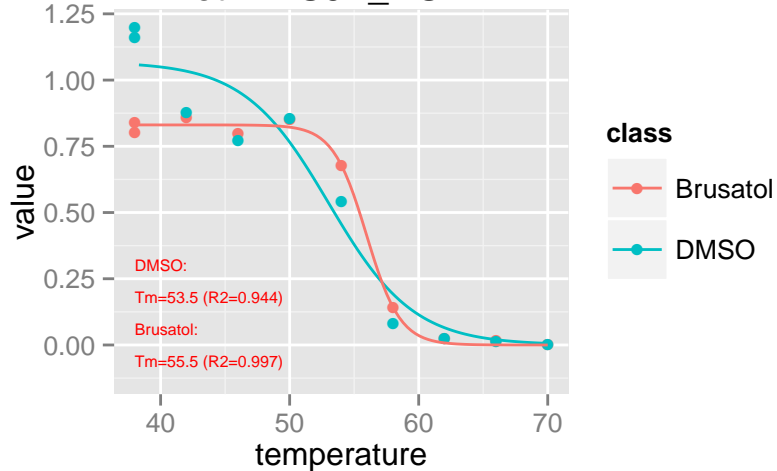

Prot: PRS7\_HUMAN

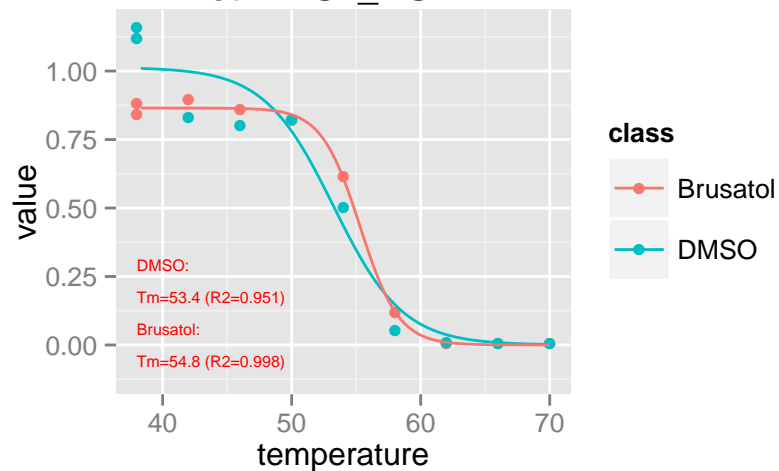

Prot: PRS8\_HUMAN

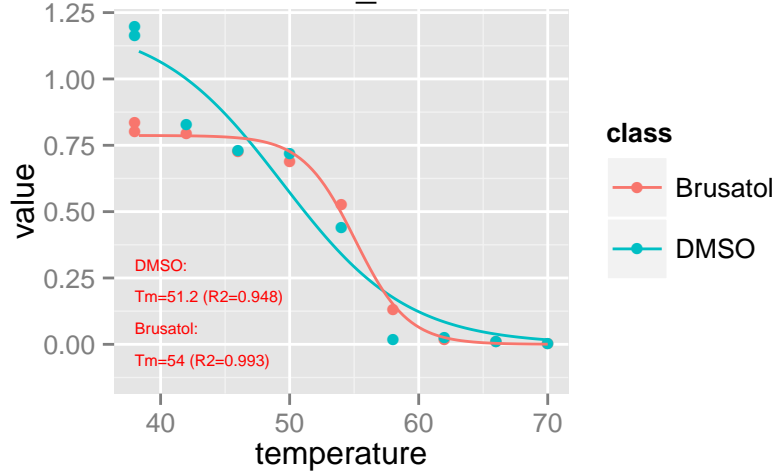

Prot: PRUNE\_HUMAN

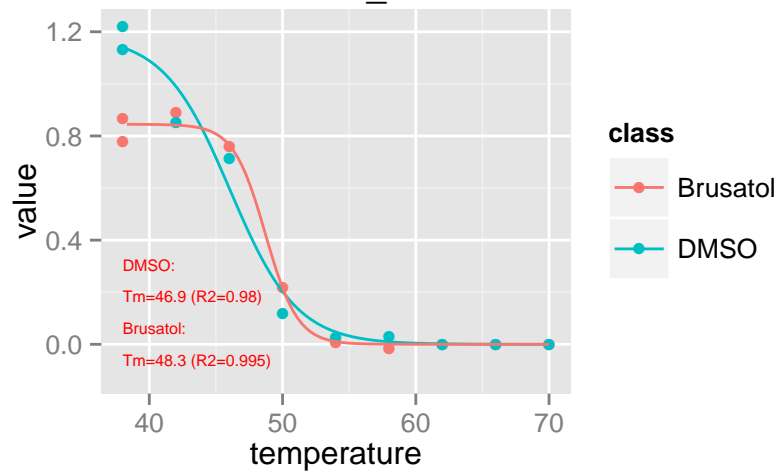

Prot: PSA\_HUMAN

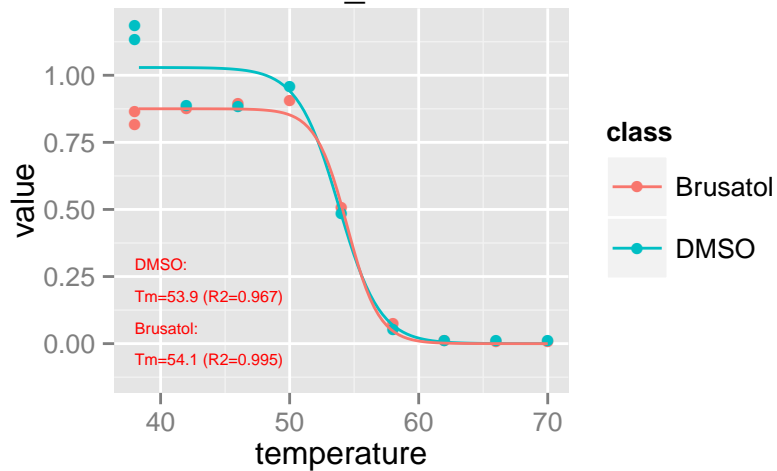

Prot: PSA1\_HUMAN

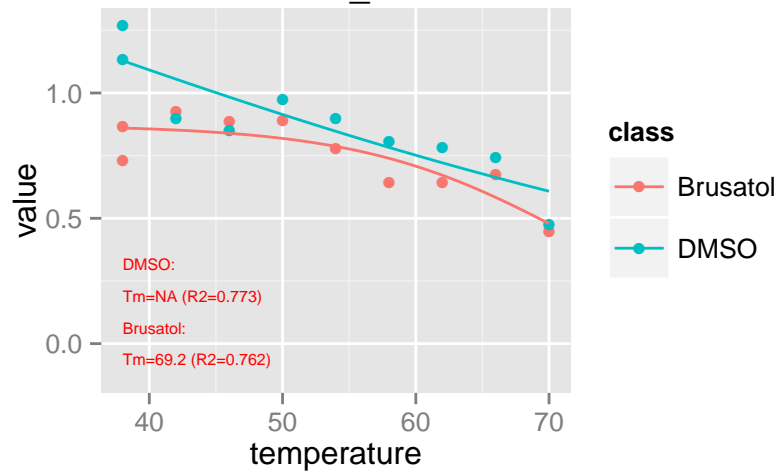

Prot: PSA2\_HUMAN

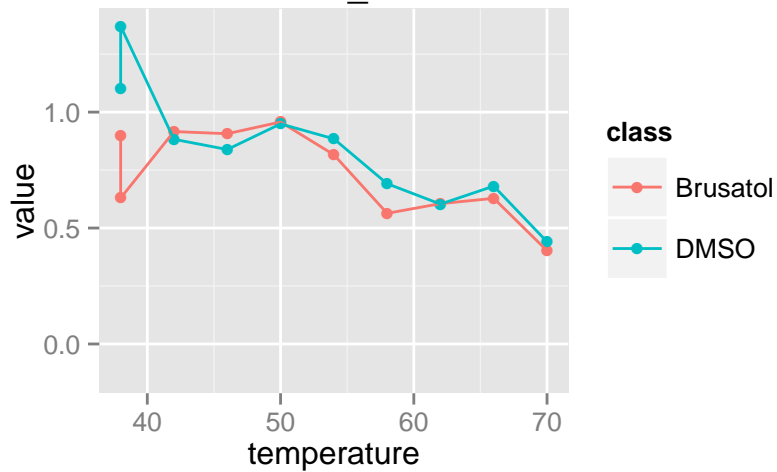

Prot: PSA3\_HUMAN

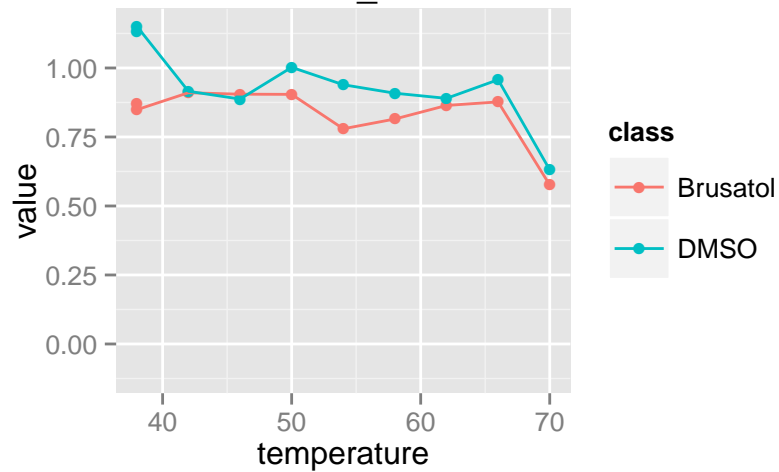

Prot: PSA4\_HUMAN

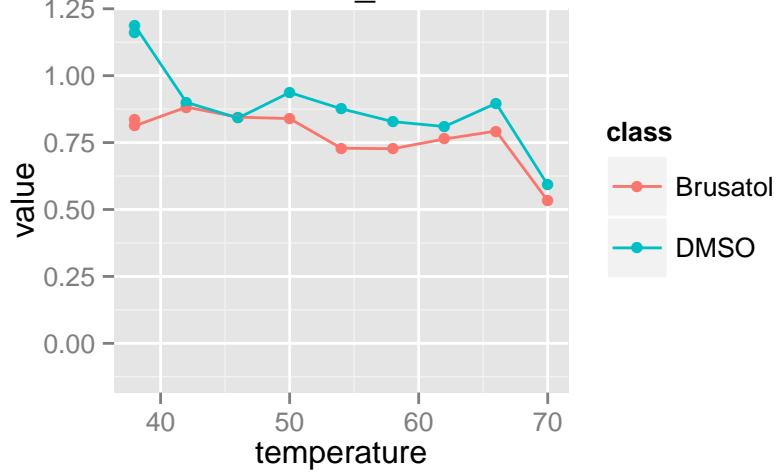

Prot: PSA5\_HUMAN

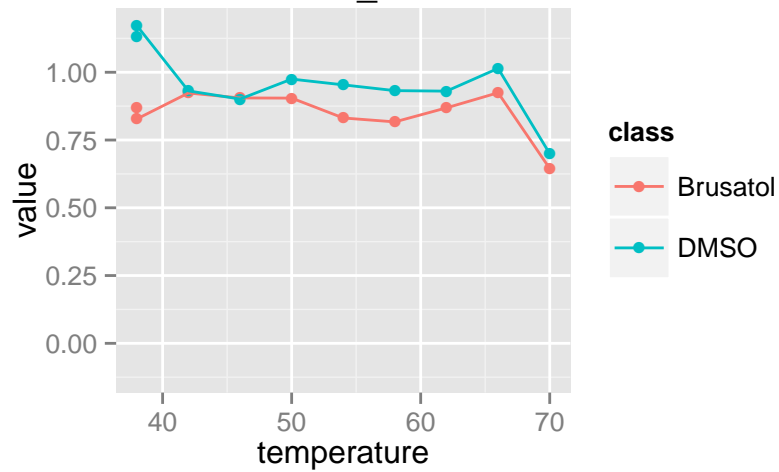



Prot: PSA6\_HUMAN

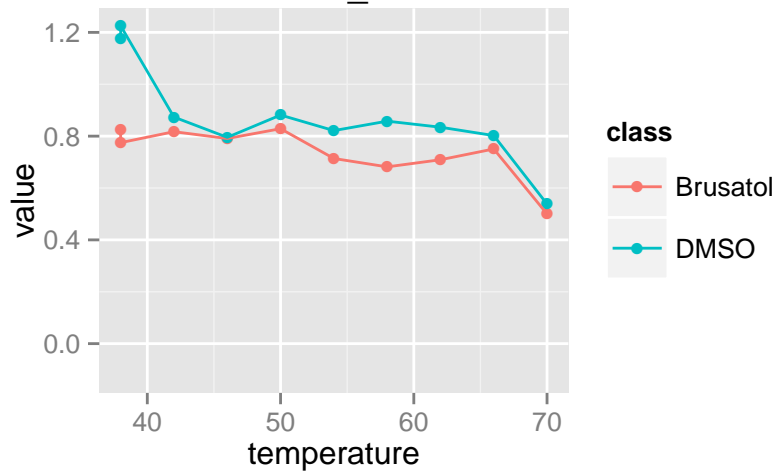

Prot: PSA7\_HUMAN

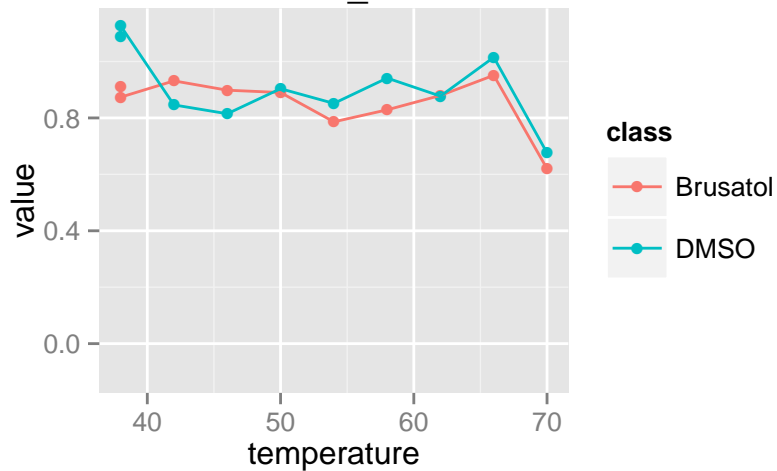

Prot: PSA7L\_HUMAN

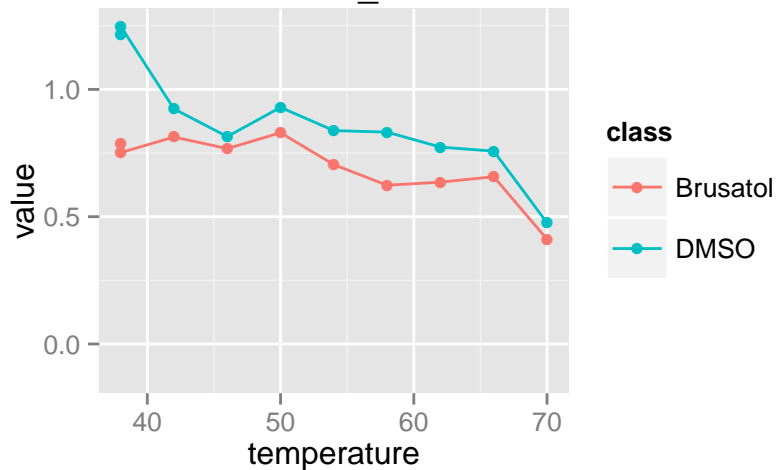

Prot: PSAL\_HUMAN

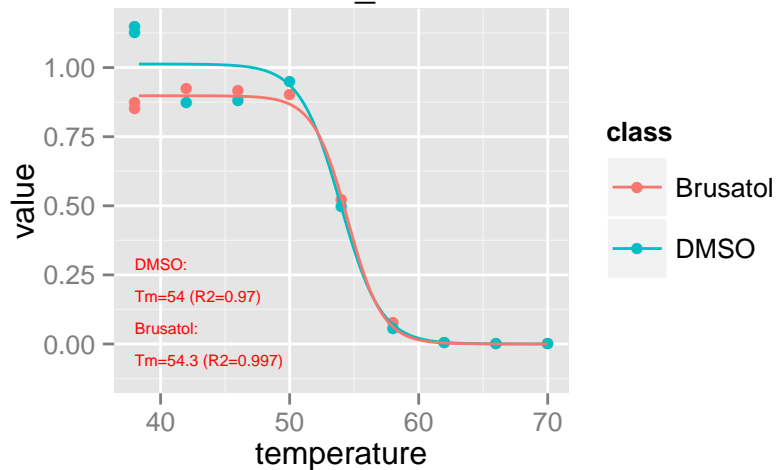

Prot: PSB1\_HUMAN

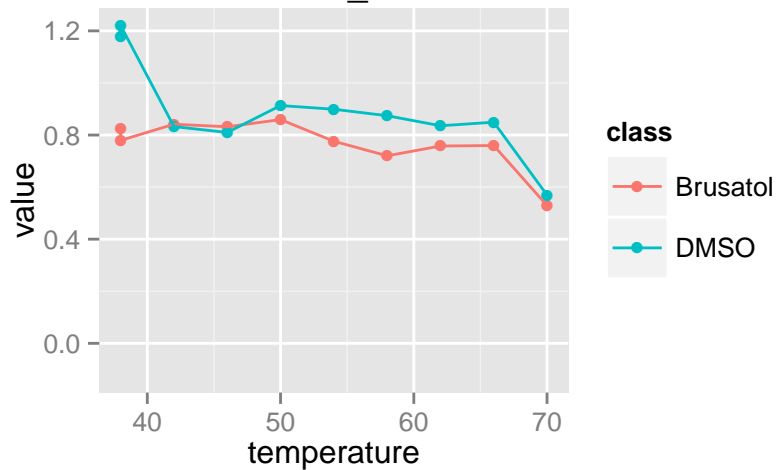

Prot: PSB10\_HUMAN

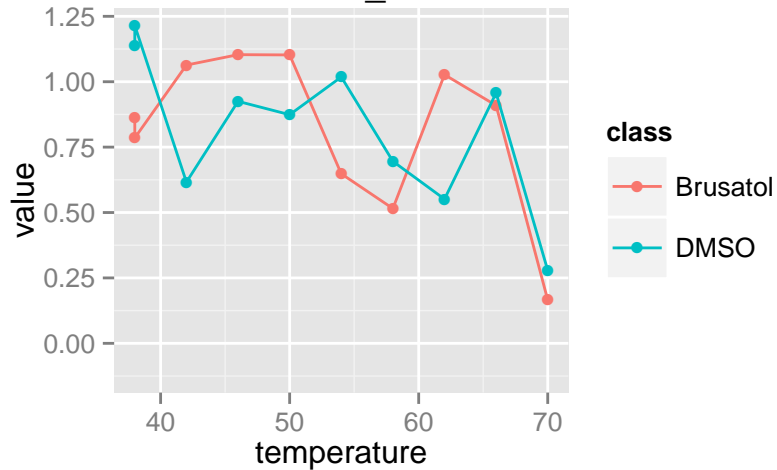

Prot: PSB2\_HUMAN

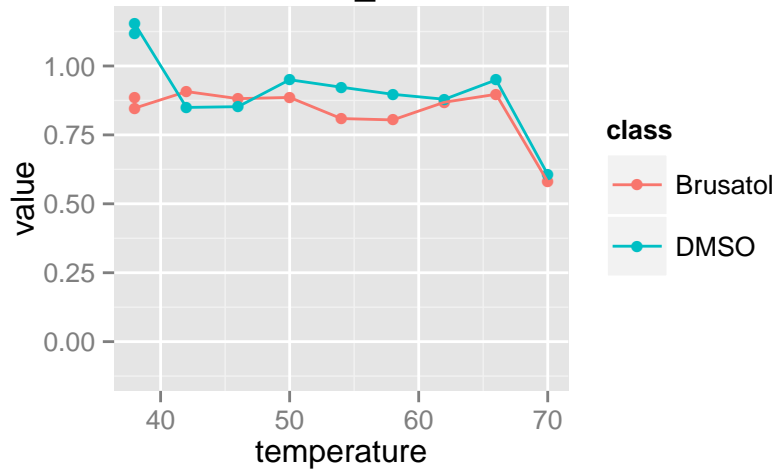

Prot: PSB3\_HUMAN

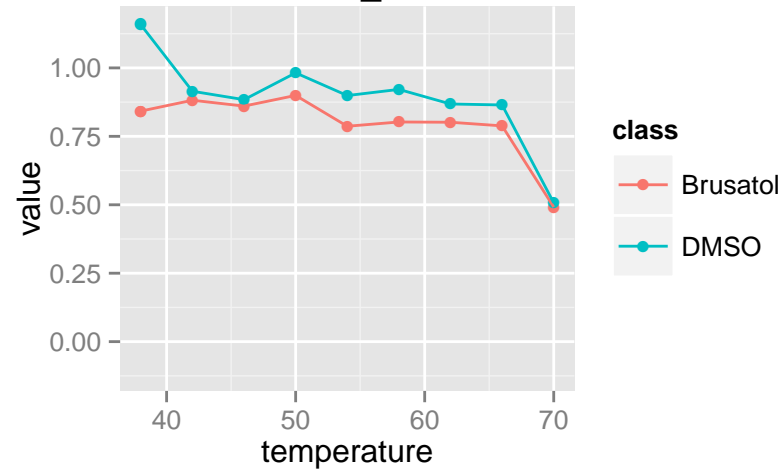

Prot: PSB4\_HUMAN

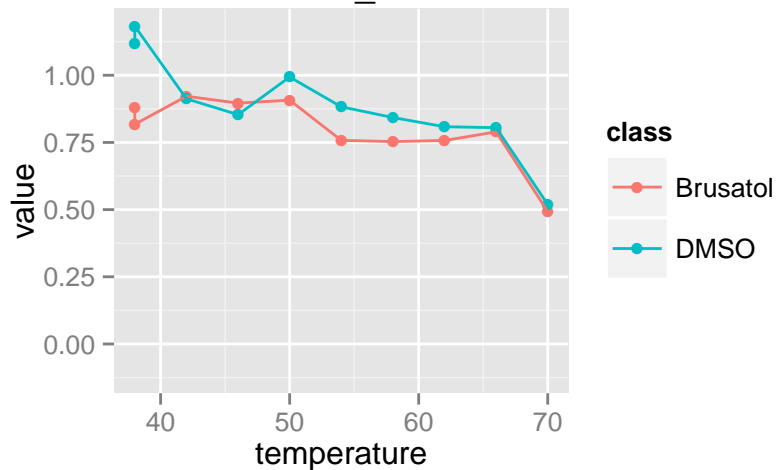

Prot: PSB5\_HUMAN

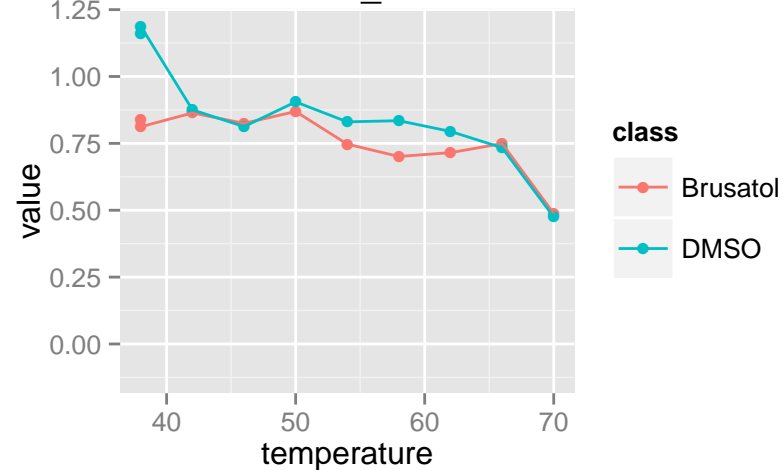

Prot: PSB6\_HUMAN

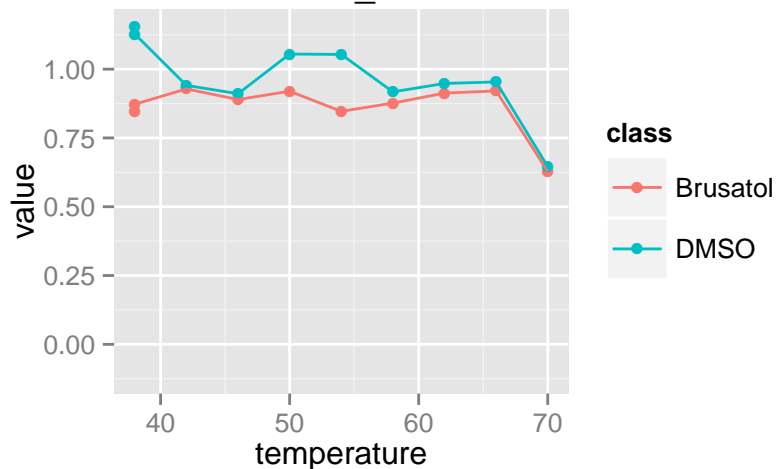

Prot: PSB7\_HUMAN

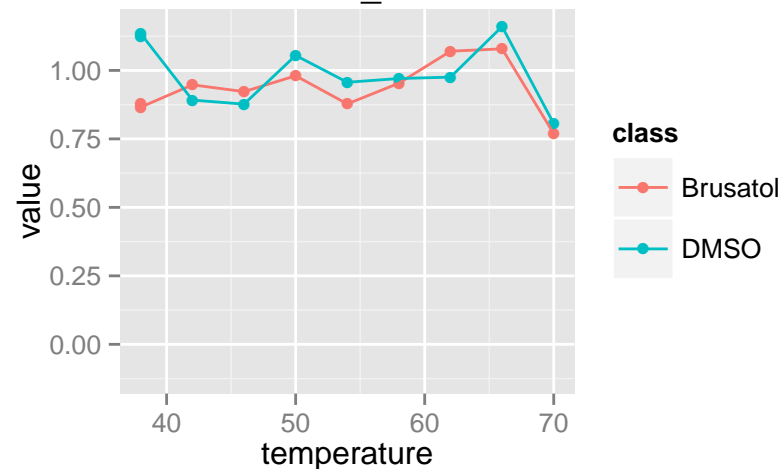

Prot: PSB8\_HUMAN

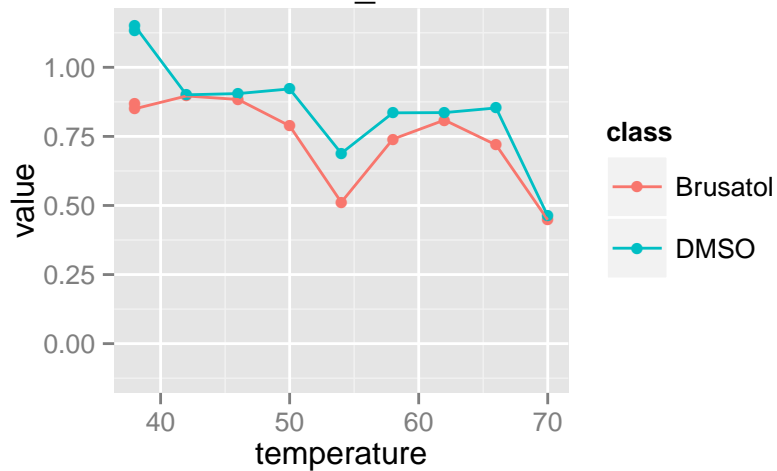

Prot: PSB9\_HUMAN

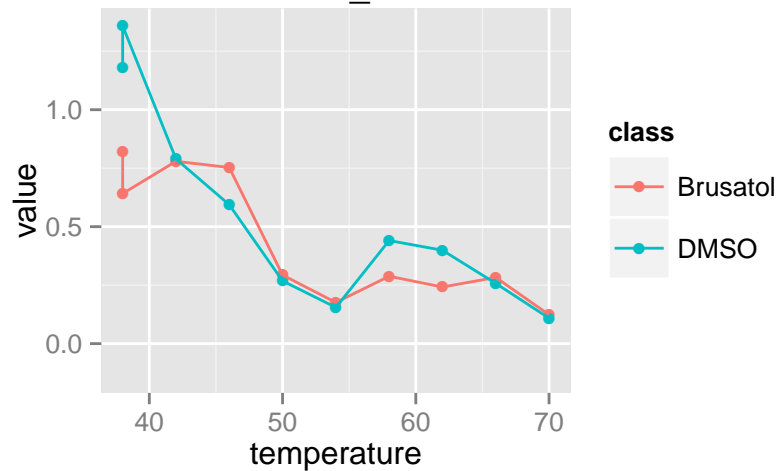

Prot: PSD10\_HUMAN

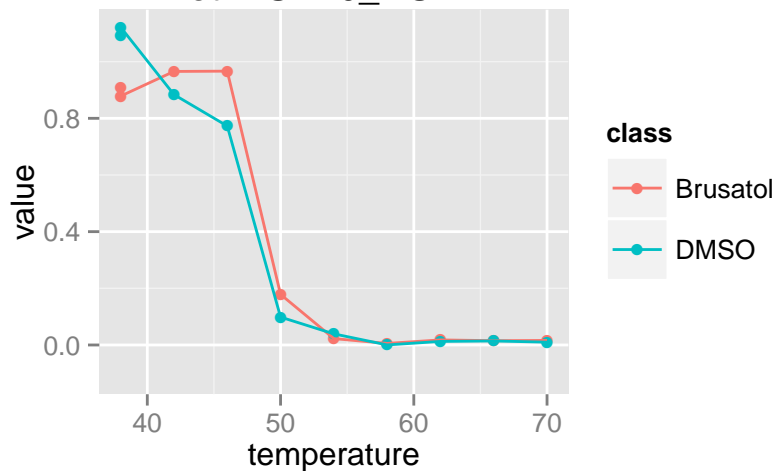

Prot: PSD11\_HUMAN

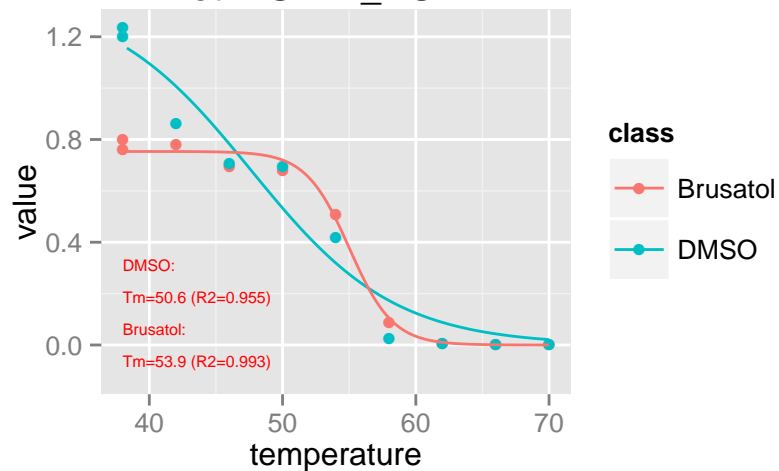

Prot: PSD12\_HUMAN

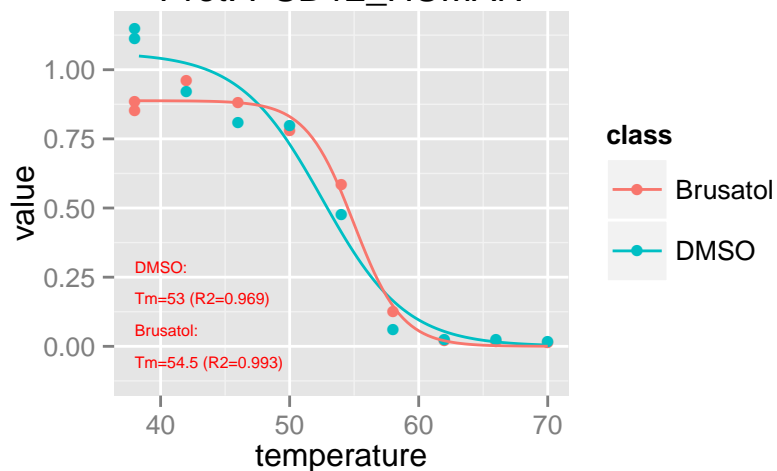

Prot: PSD13\_HUMAN

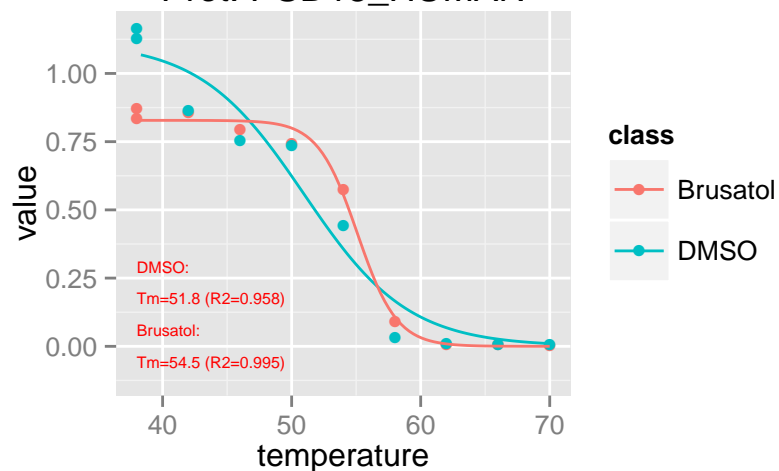

Prot: PSD7\_HUMAN

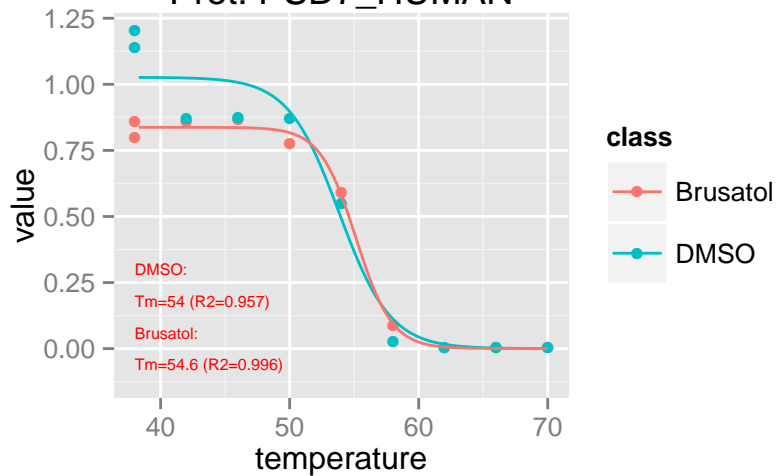

Prot: PSDE\_HUMAN

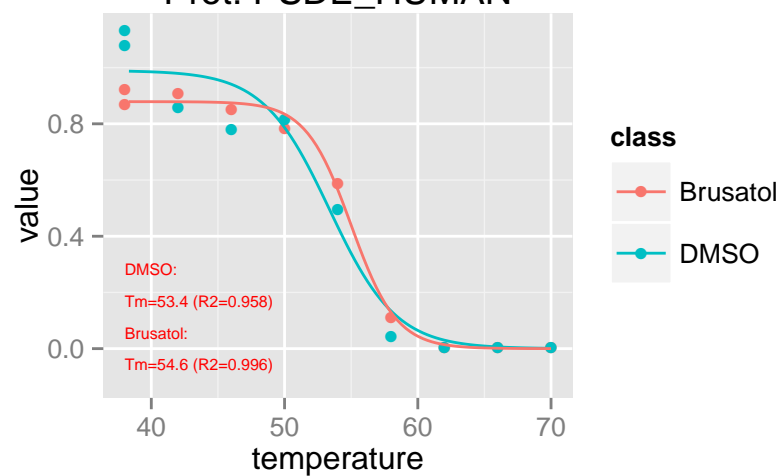

Prot: PSF1\_HUMAN

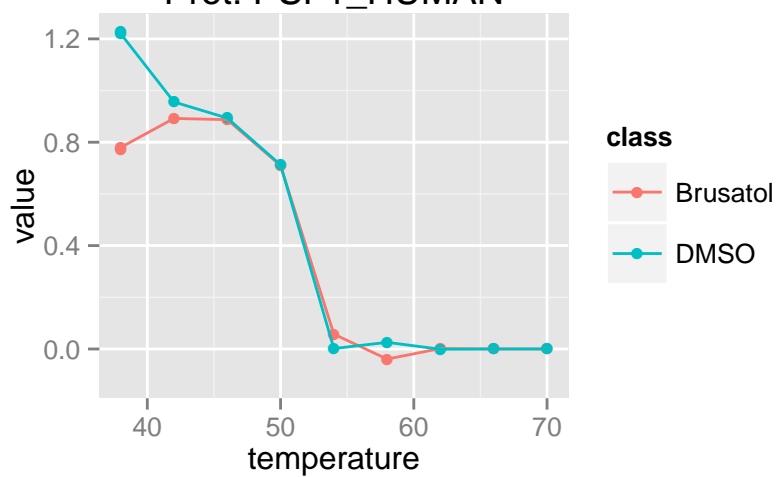

Prot: PSF2\_HUMAN

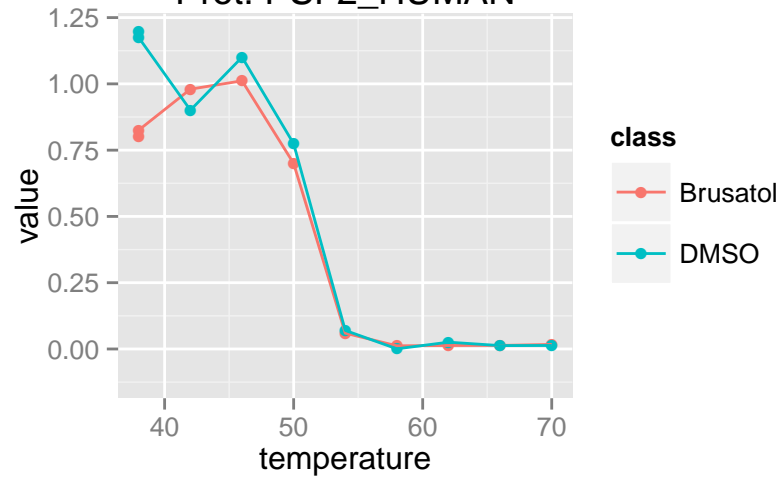

Prot: PSF3\_HUMAN

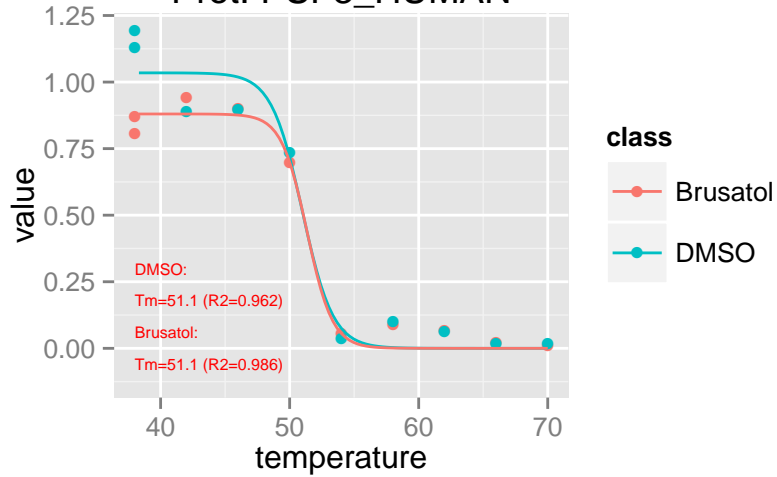

Prot: PSIP1\_HUMAN

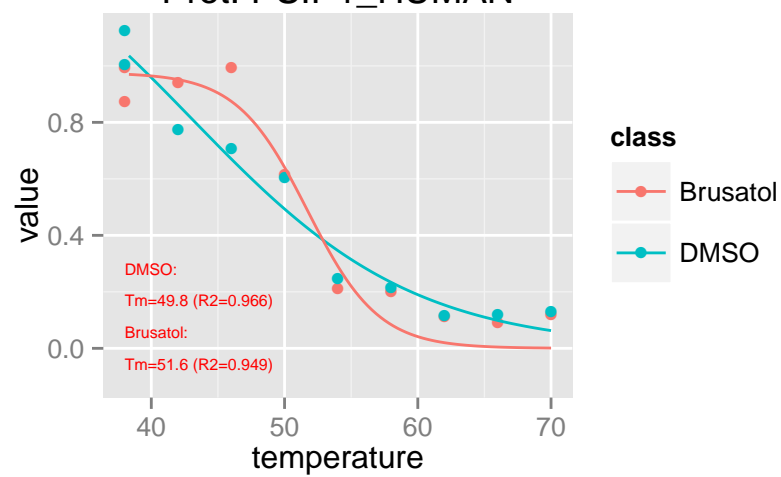

Prot: PSMD1\_HUMAN

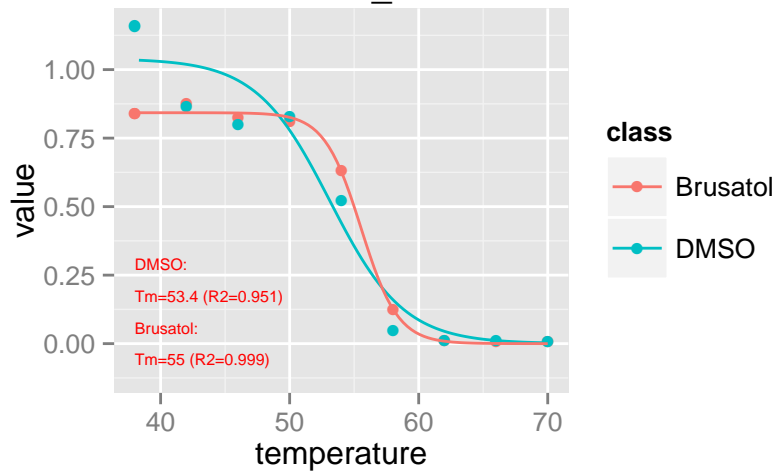

Prot: PSMD2\_HUMAN

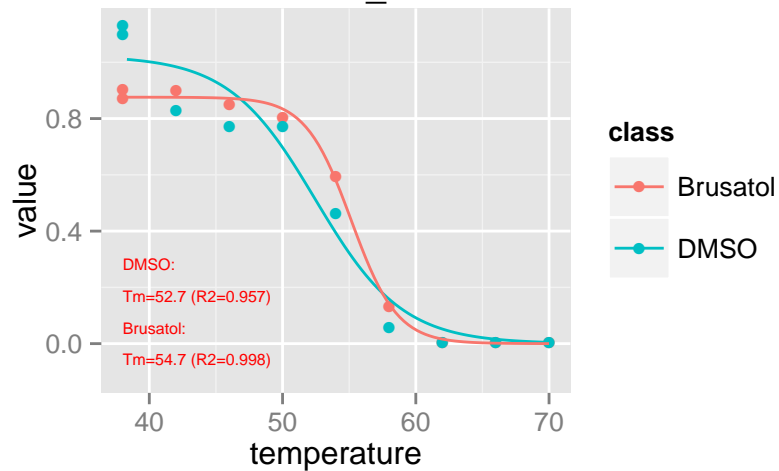

Prot: PSMD3\_HUMAN

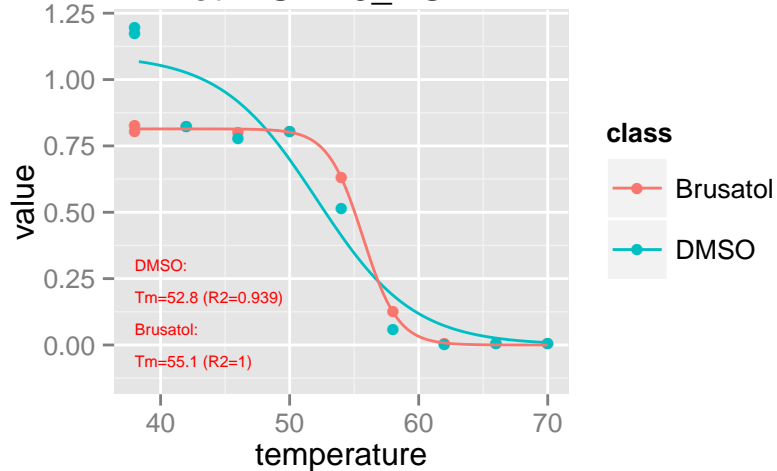

Prot: PSMD4\_HUMAN

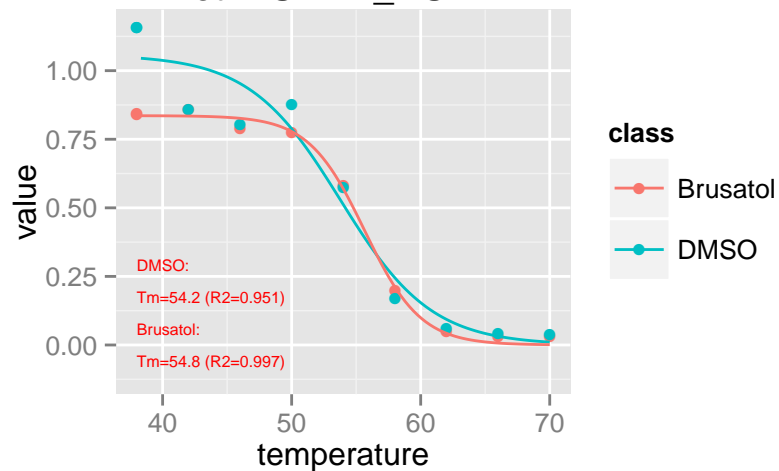

Prot: PSMD5\_HUMAN

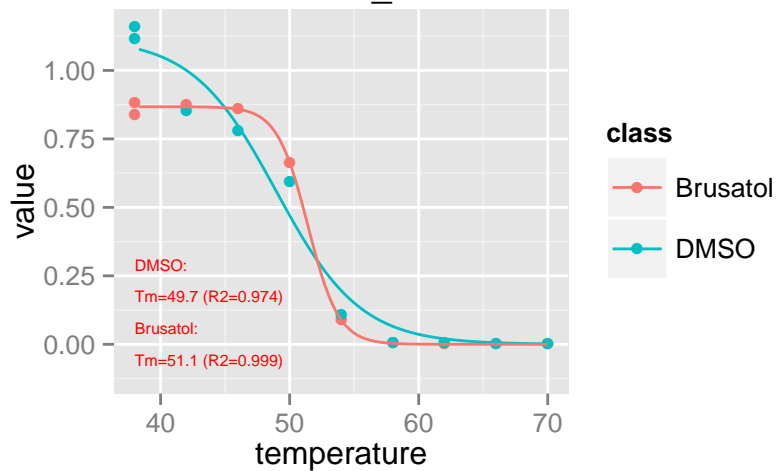

Prot: PSMD6\_HUMAN

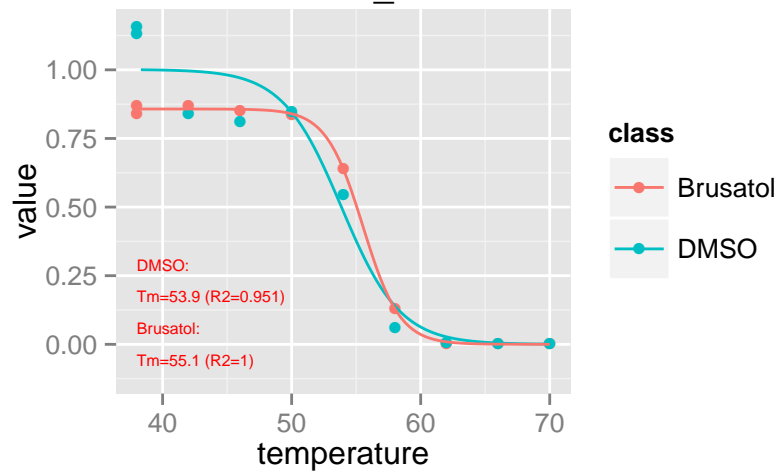

Prot: PSMD8\_HUMAN

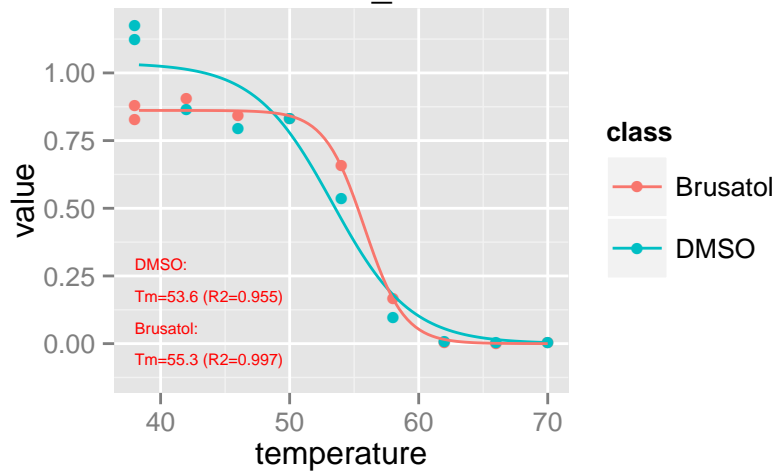

Prot: PSMD9\_HUMAN

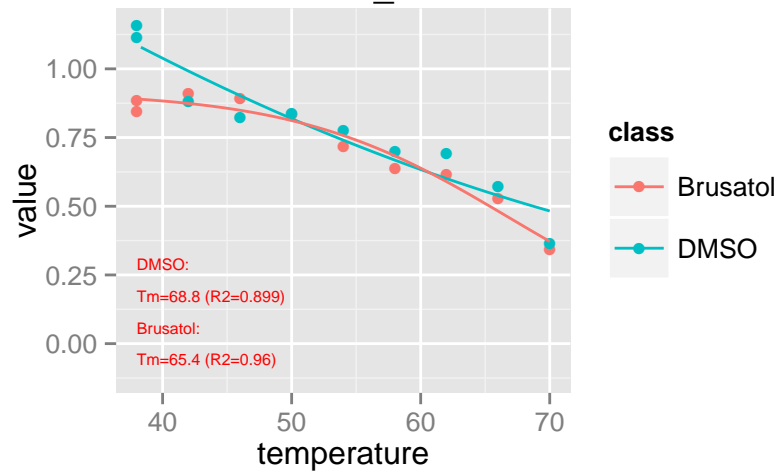

Prot: PSME1\_HUMAN

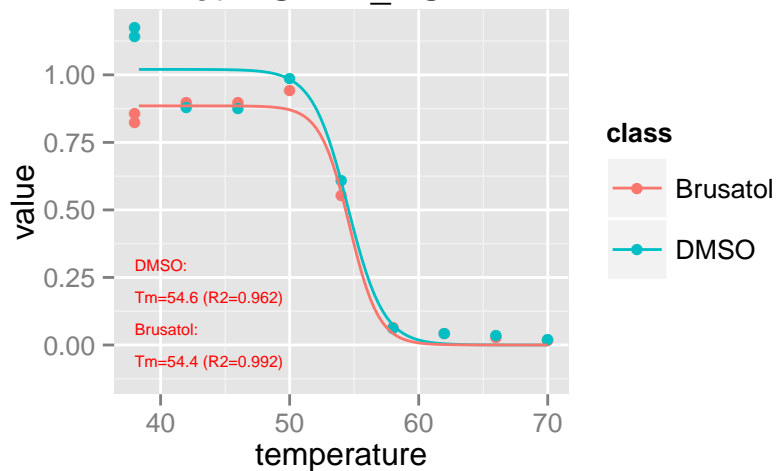

Prot: PSME2\_HUMAN

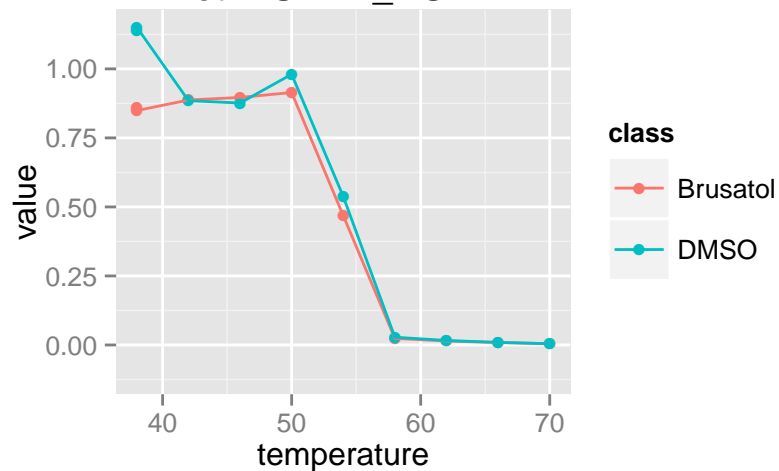

Prot: PSME3\_HUMAN

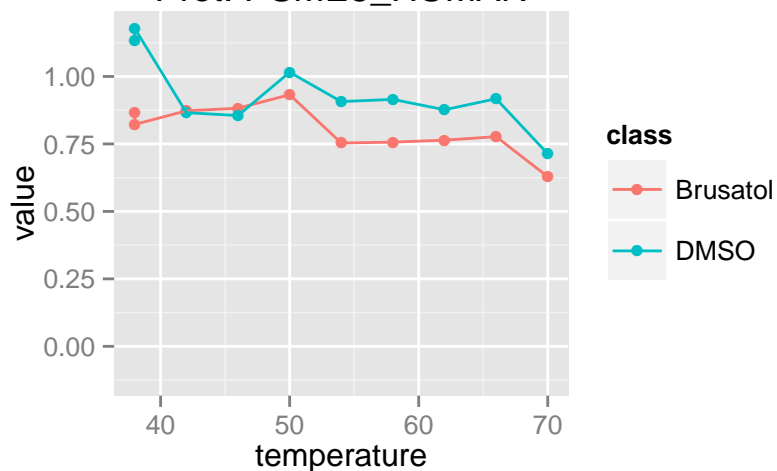

Prot: PSME4\_HUMAN

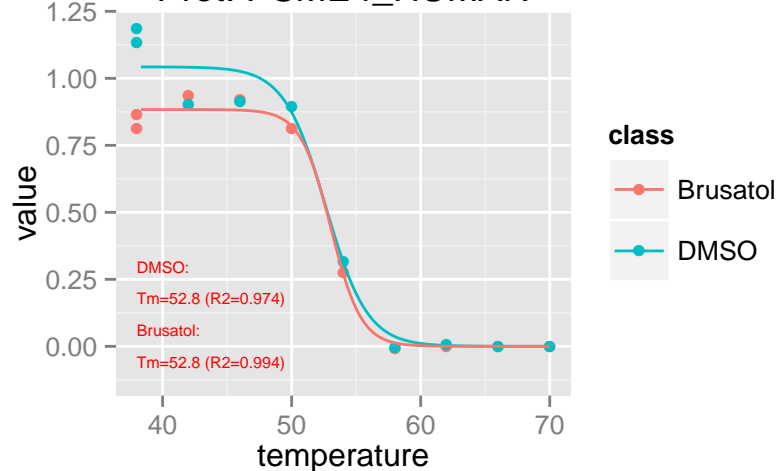

Prot: PSMF1\_HUMAN

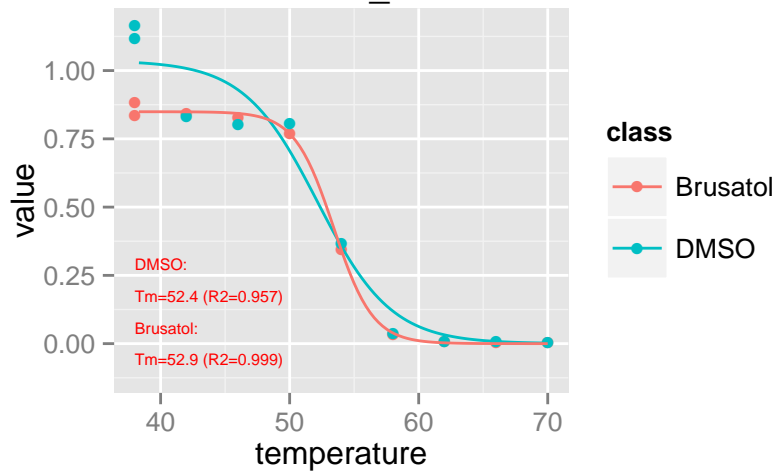

Prot: PSMG1\_HUMAN

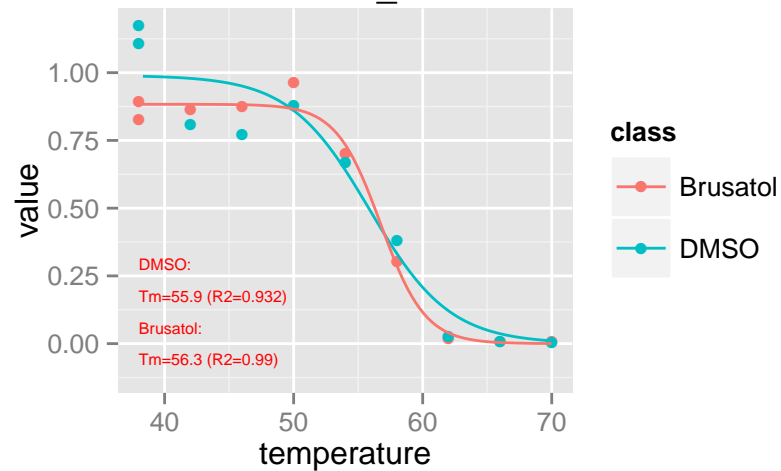

Prot: PSMG2\_HUMAN

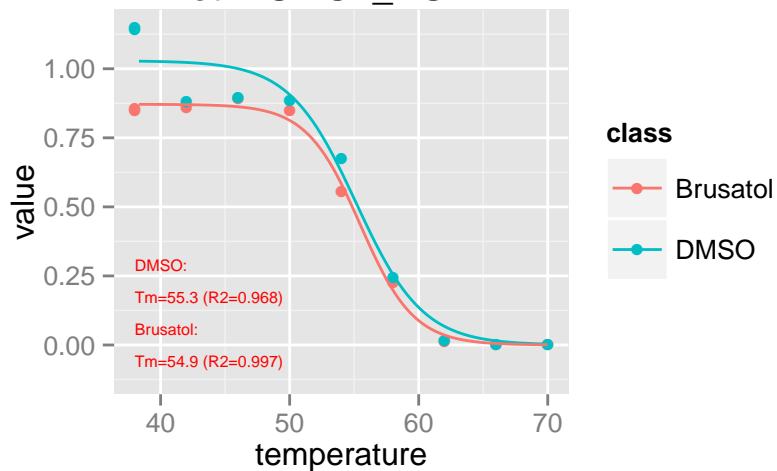

Prot: PSMG3\_HUMAN

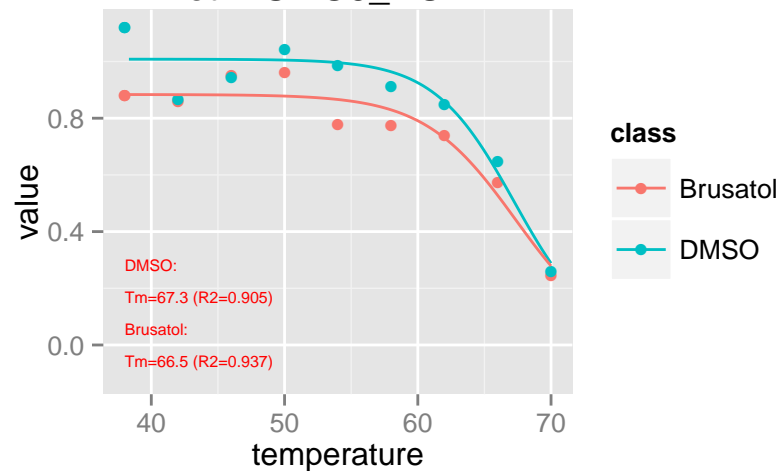

Prot: PSPC1\_HUMAN

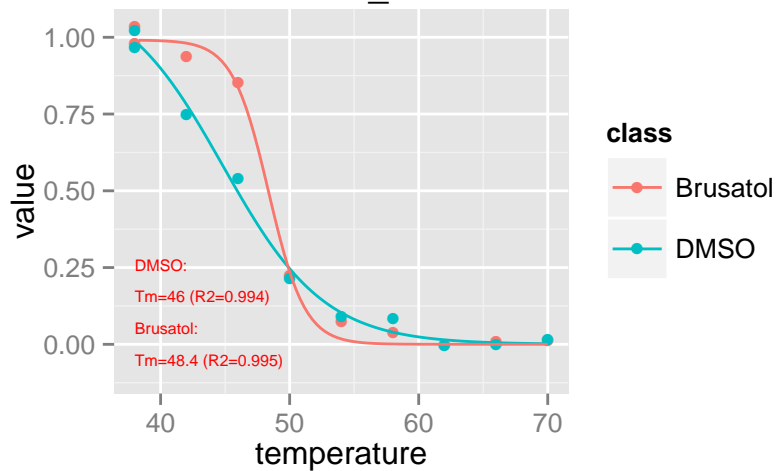

Prot: PTBP1\_HUMAN

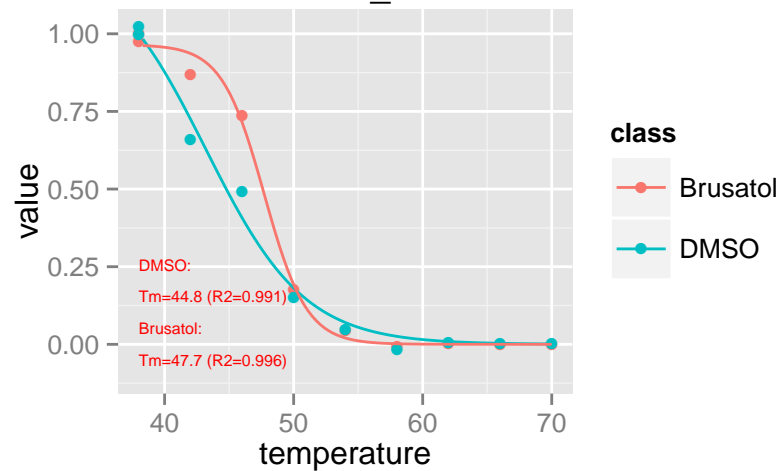

Prot: PTBP2\_HUMAN

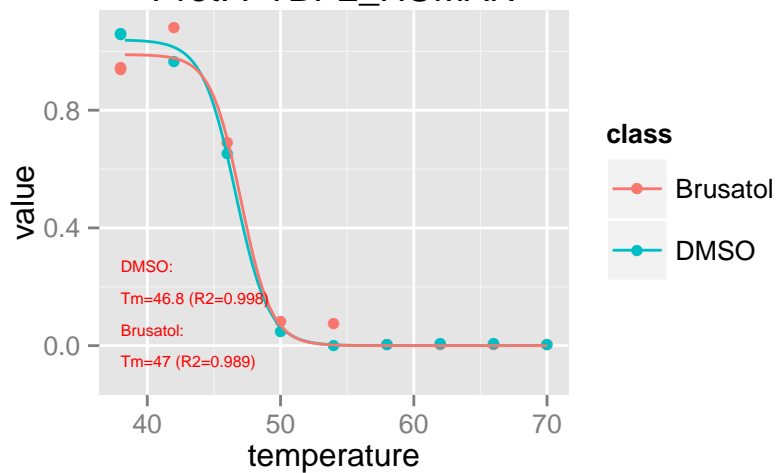

Prot: PTCD3\_HUMAN

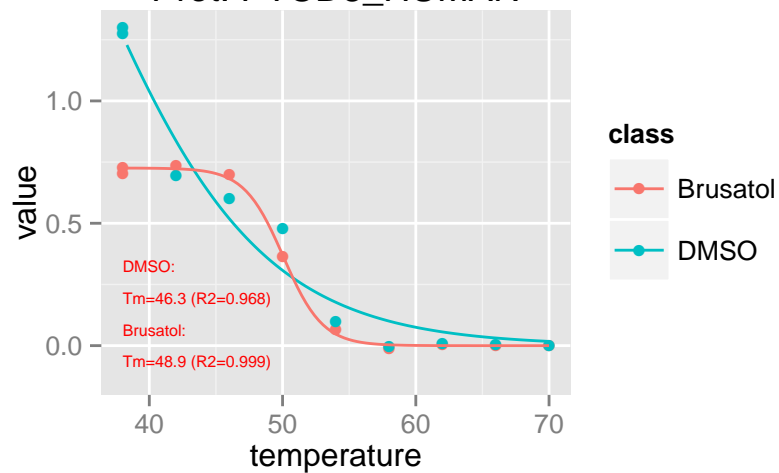

Prot: PTEN\_HUMAN

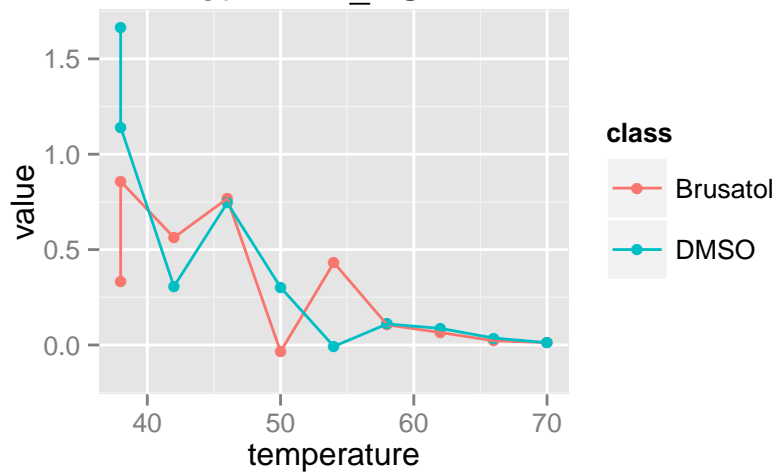

Prot: PTER\_HUMAN

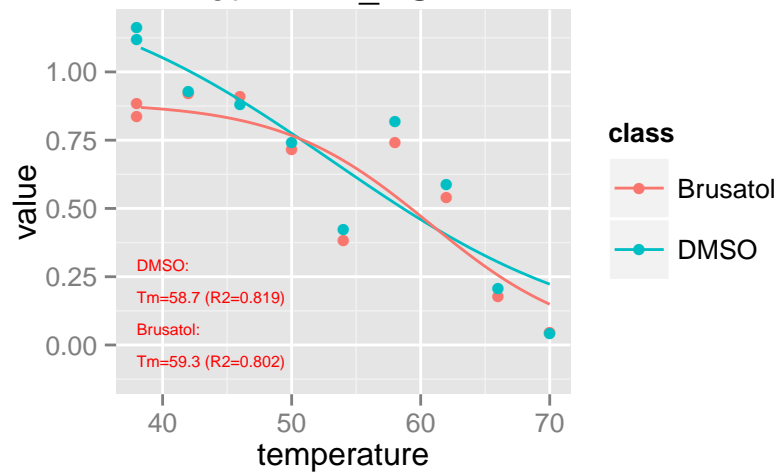

Prot: PTGR1\_HUMAN

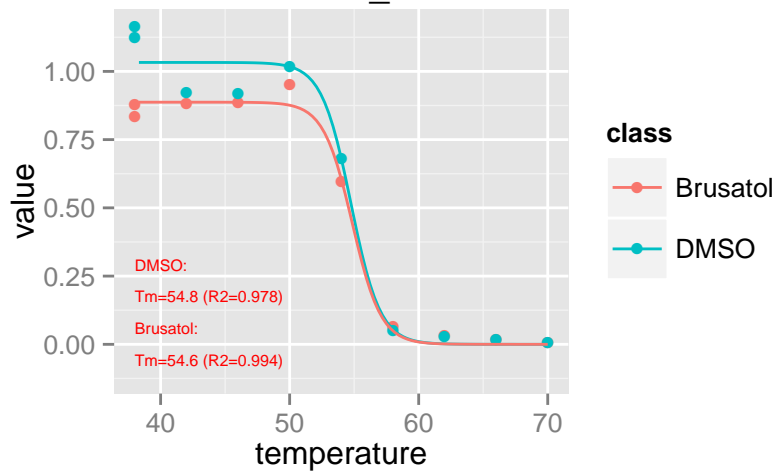

Prot: PTGR2\_HUMAN

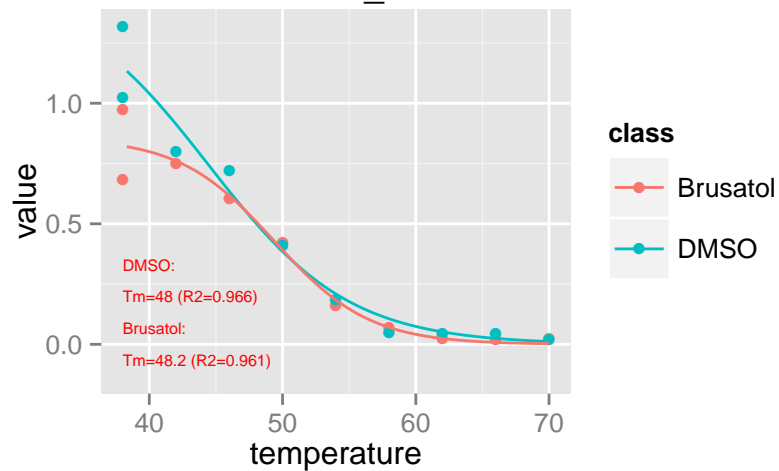



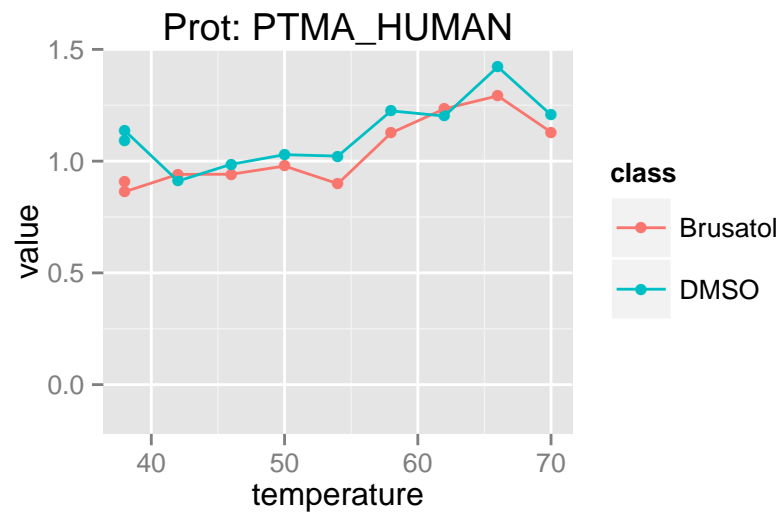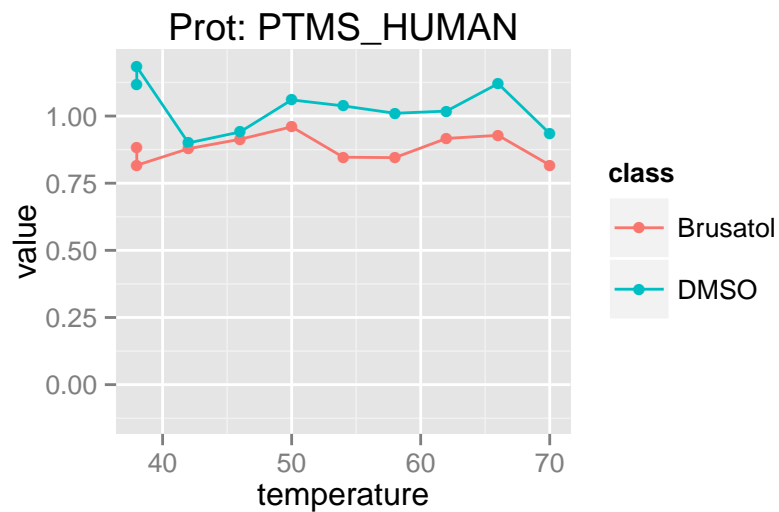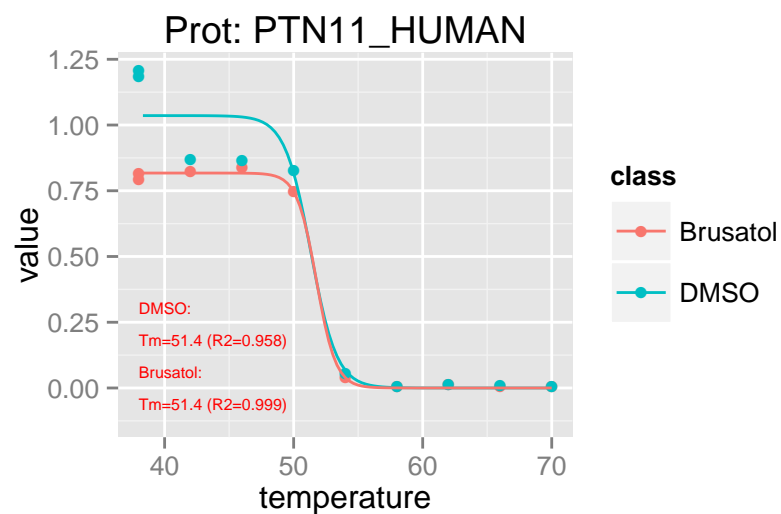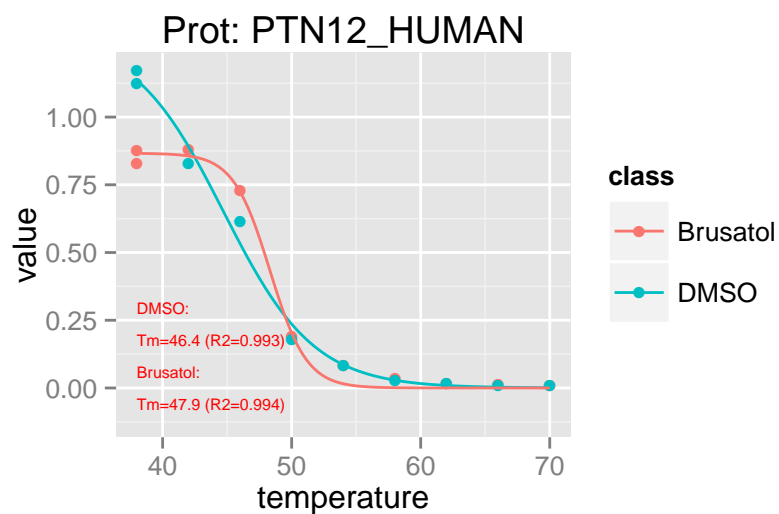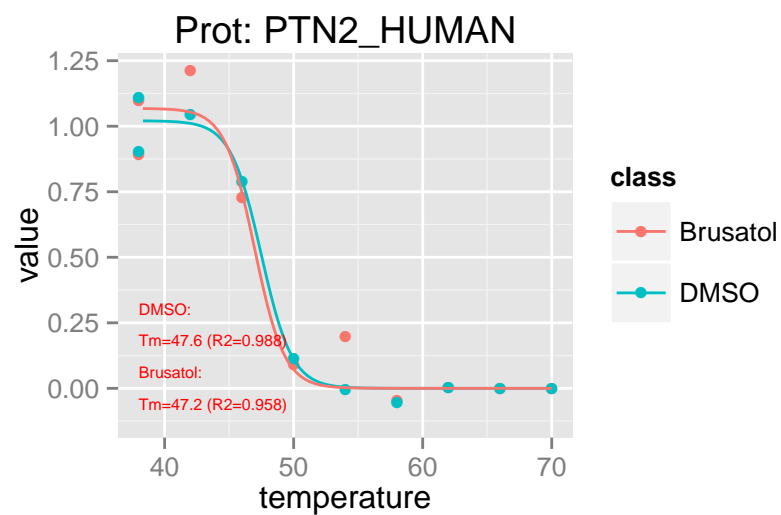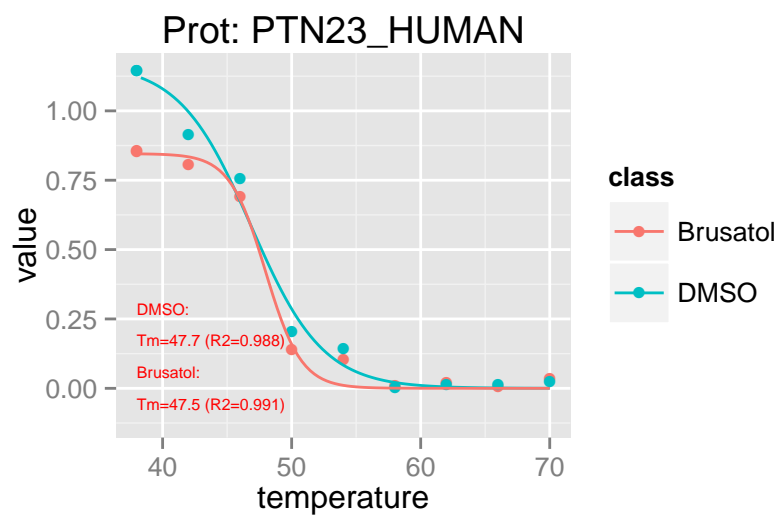

Prot: PTN6\_HUMAN

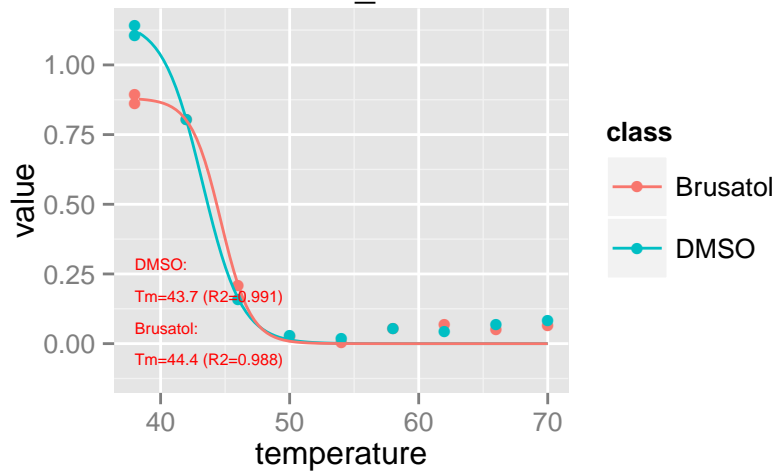

Prot: PTPA\_HUMAN

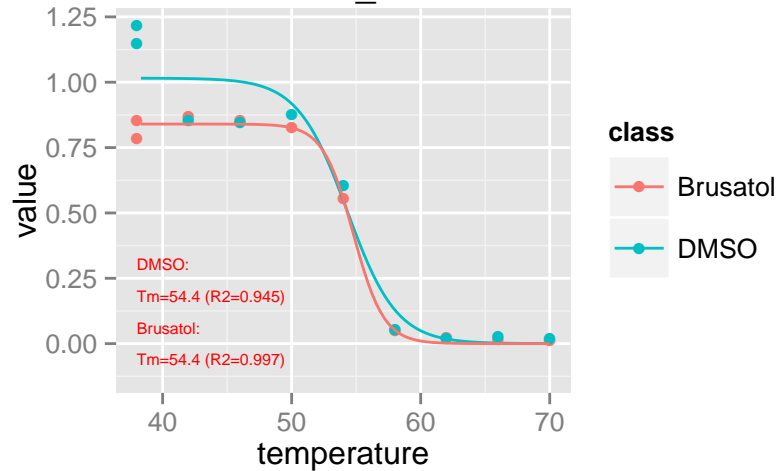

Prot: PTPRF\_HUMAN

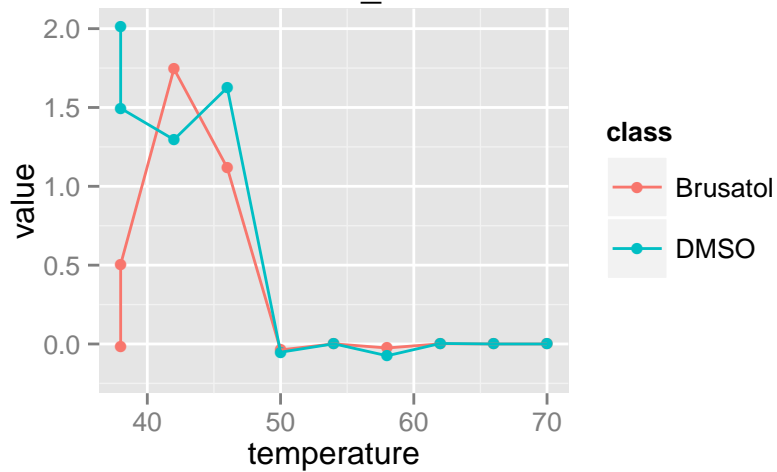

Prot: PTRD1\_HUMAN

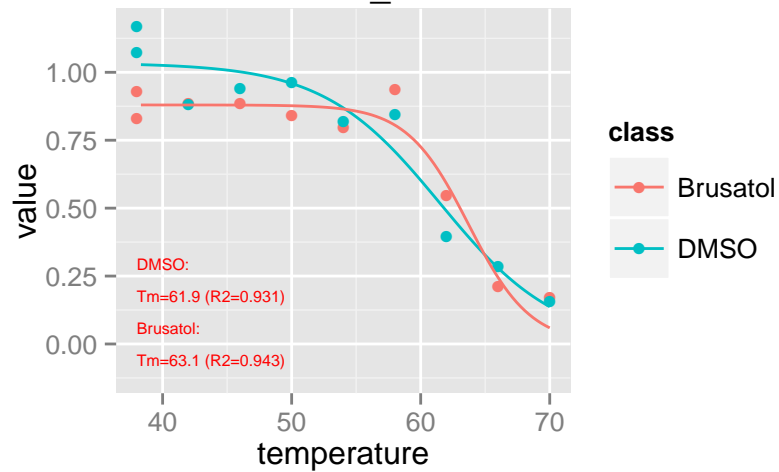

Prot: PTRF\_HUMAN

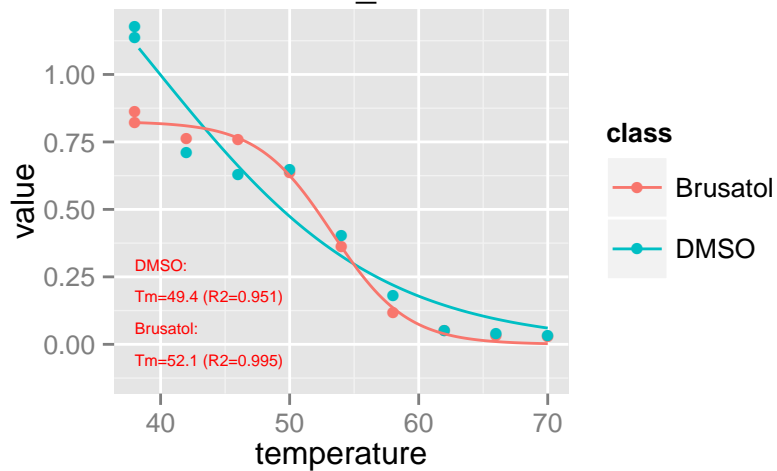

Prot: PUF60\_HUMAN

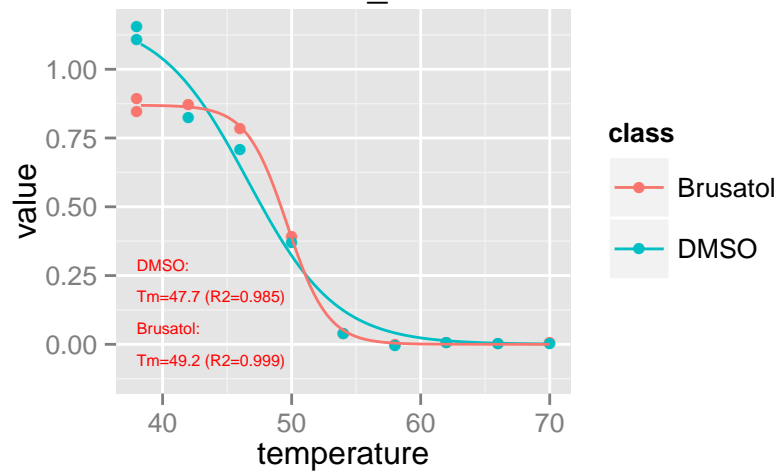

Prot: PUM1\_HUMAN

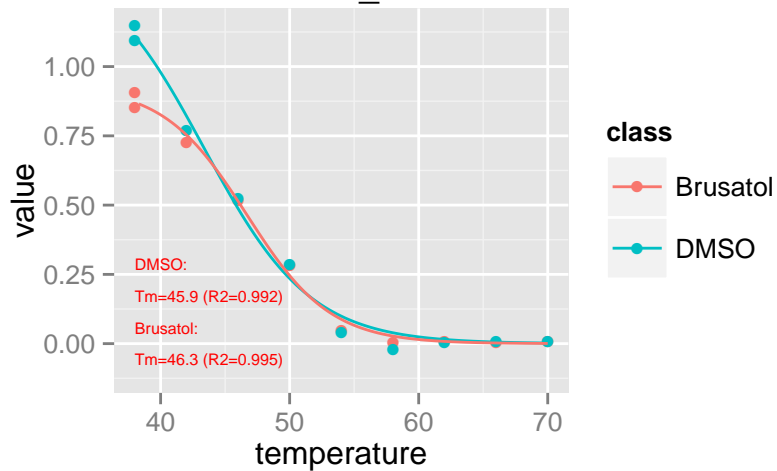

Prot: PUR1\_HUMAN

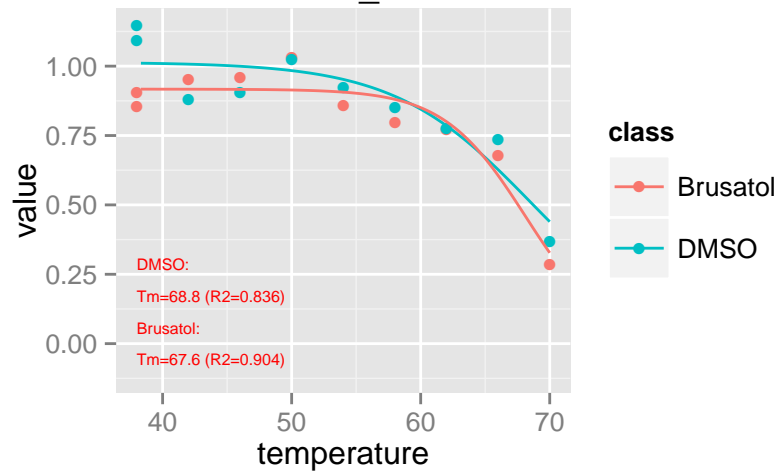

Prot: PUR2\_HUMAN

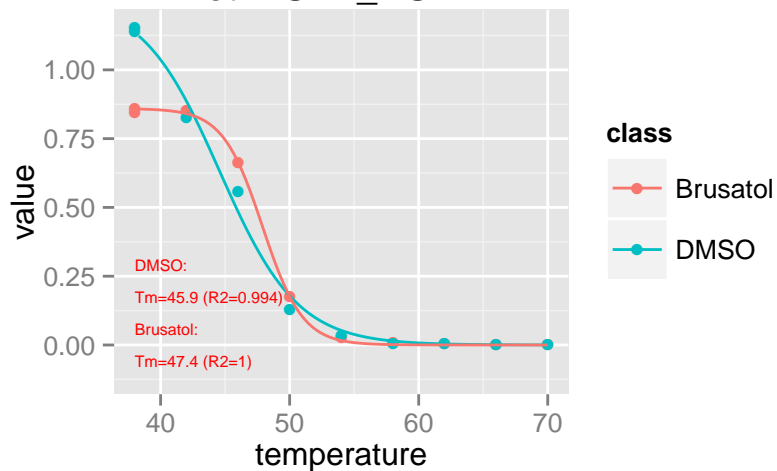

Prot: PUR4\_HUMAN

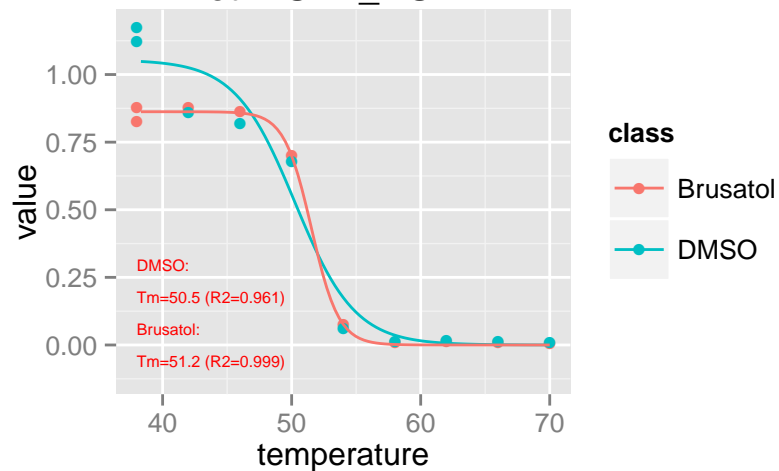

Prot: PUR6\_HUMAN

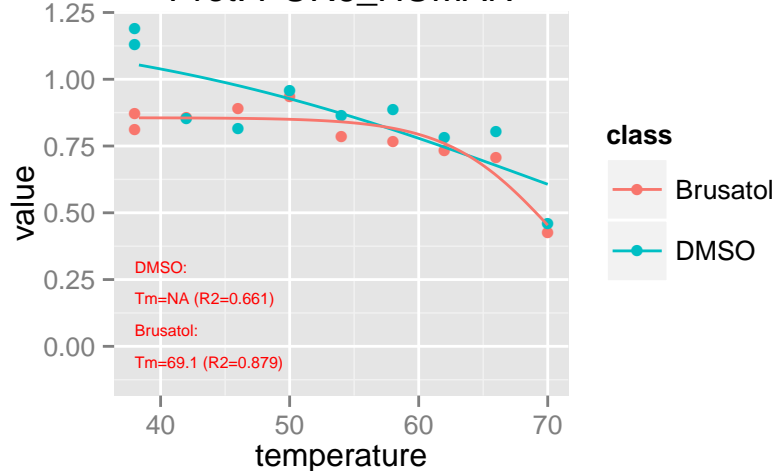

Prot: PUR8\_HUMAN

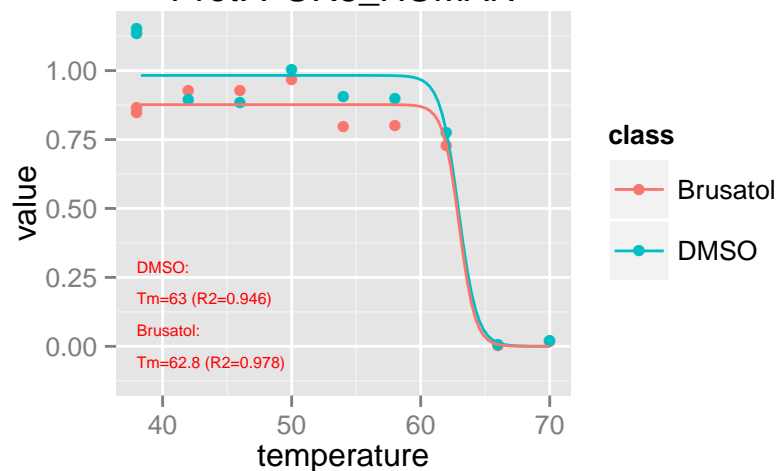

Prot: PUR9\_HUMAN

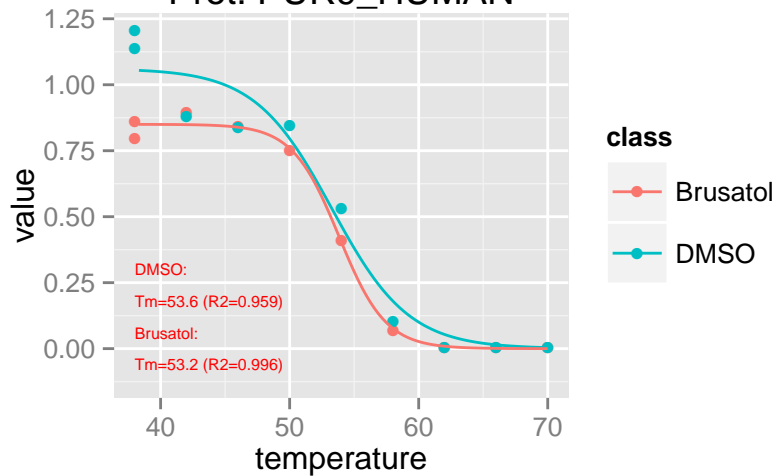

Prot: PURA\_HUMAN

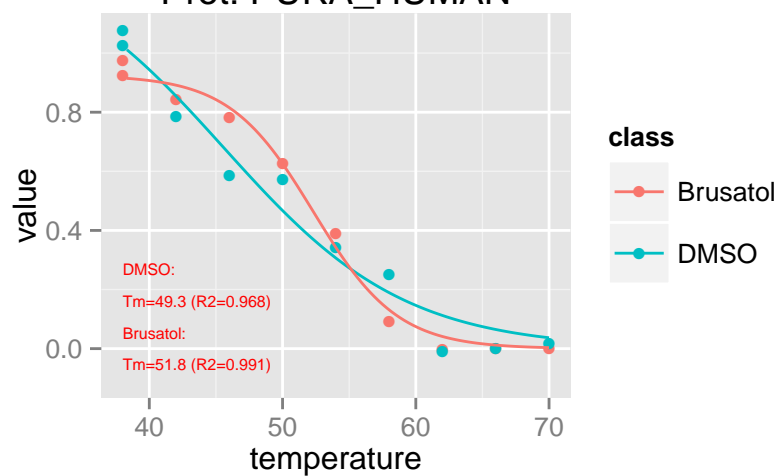

Prot: PURA1\_HUMAN

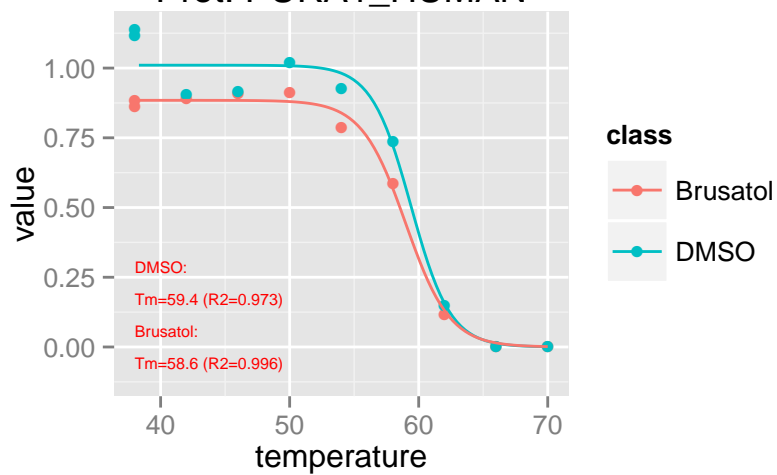

Prot: PURA2\_HUMAN

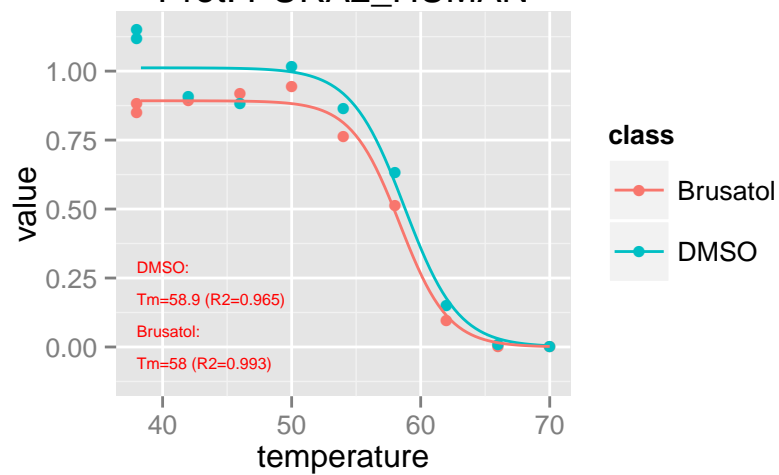

Prot: PURB\_HUMAN

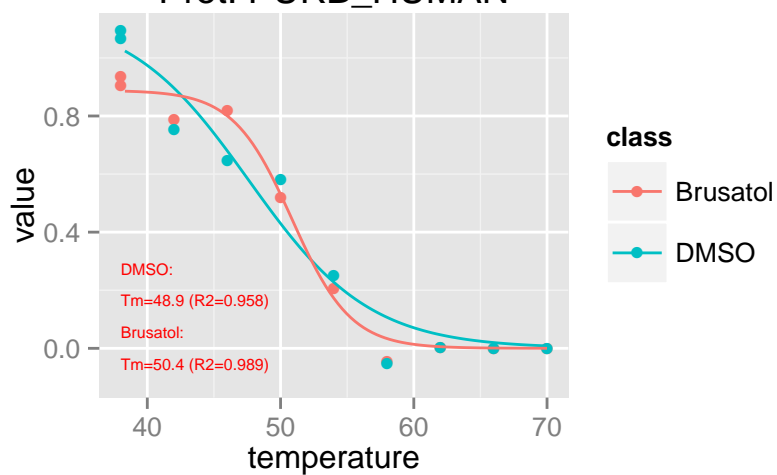

Prot: PUS7\_HUMAN

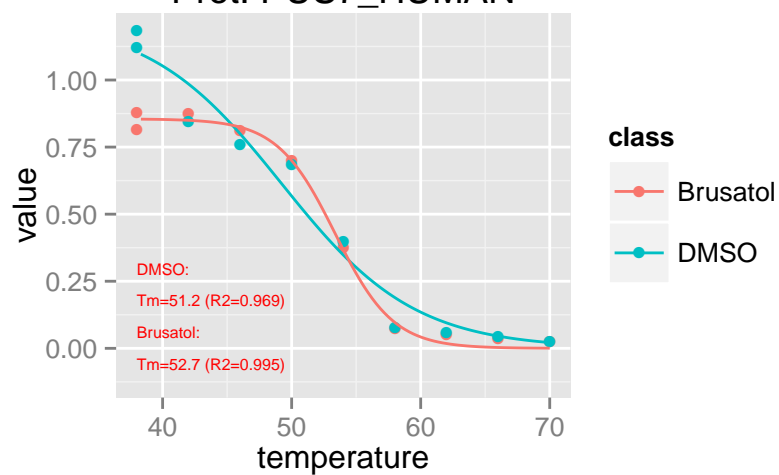

Prot: PYC\_HUMAN

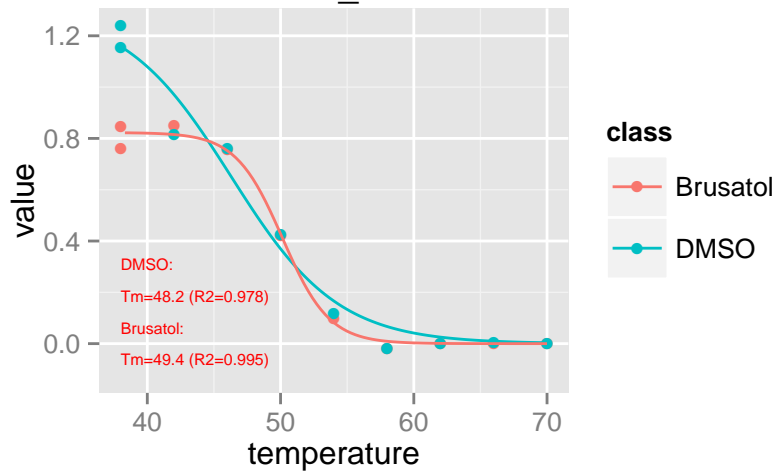

Prot: PYGB\_HUMAN

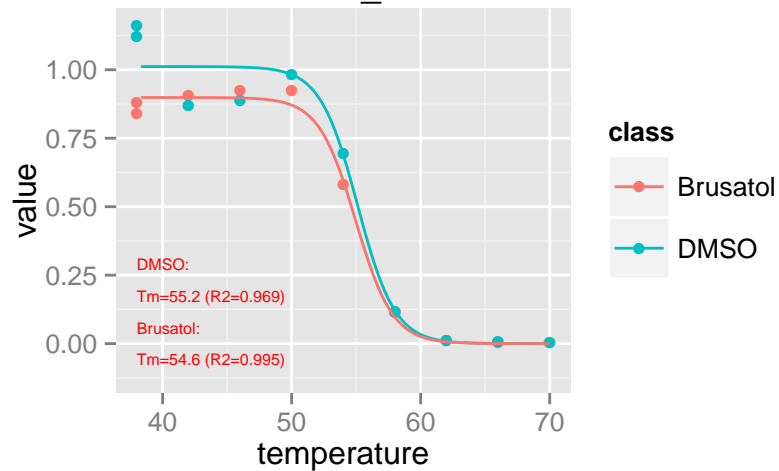

Prot: PYGL\_HUMAN

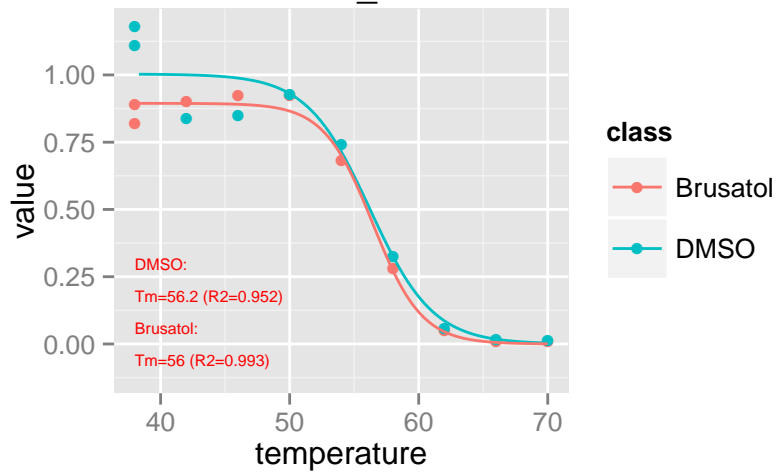

Prot: PYGO2\_HUMAN

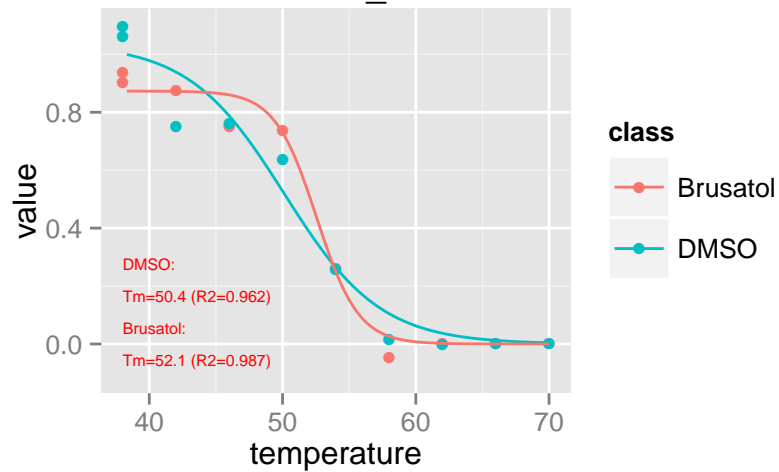

Prot: PYR1\_HUMAN

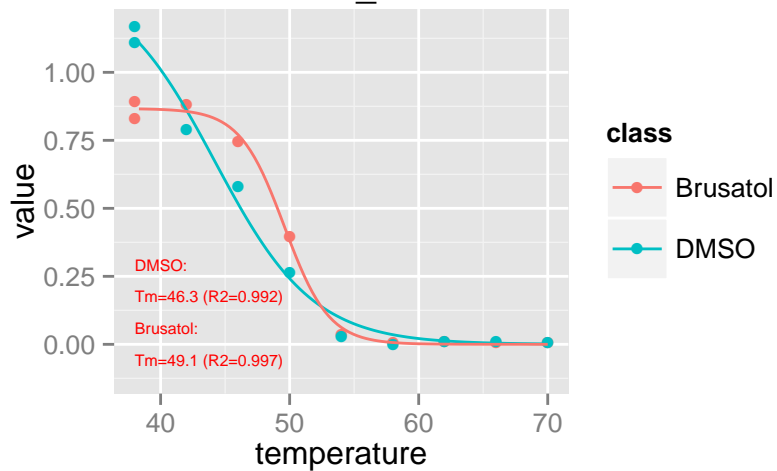

Prot: PYRG1\_HUMAN

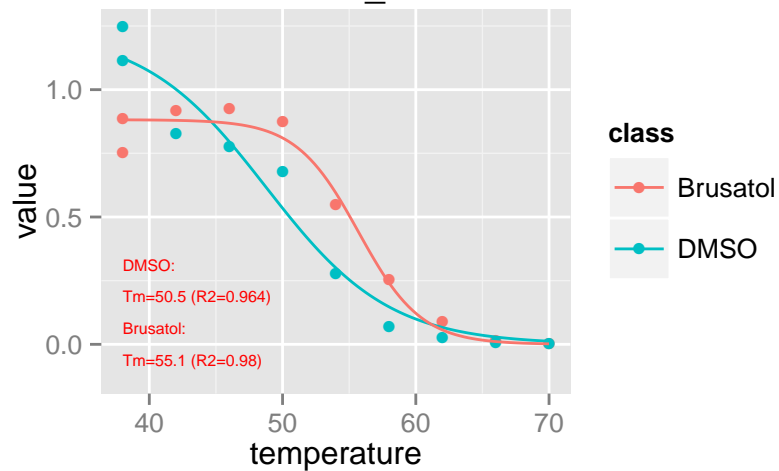

Prot: PYRG2\_HUMAN

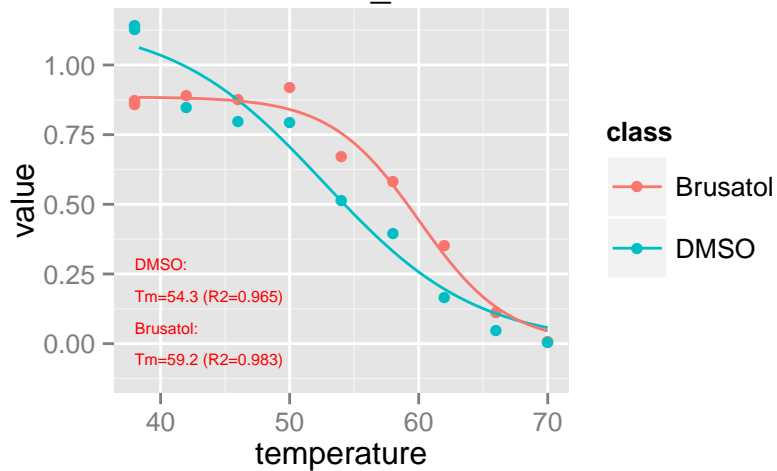

Prot: Q53FE8\_HUMAN

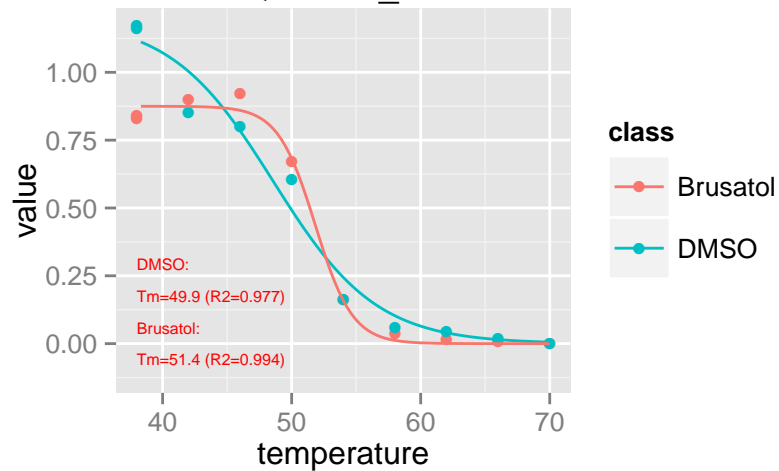

Prot: Q59E90\_HUMAN

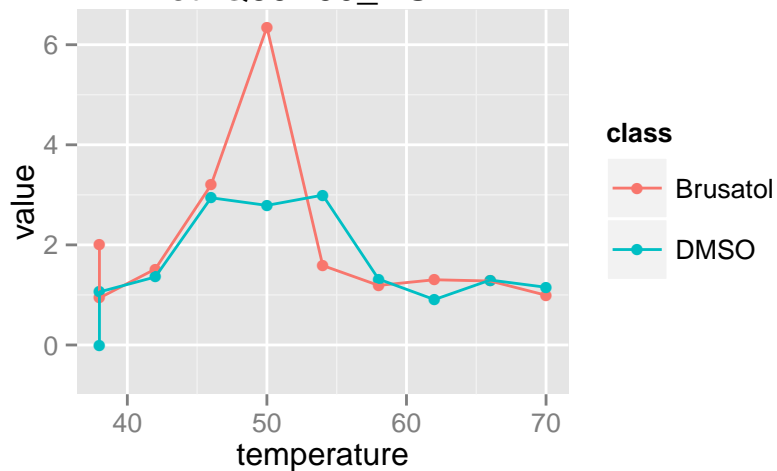

Prot: Q5TCU3\_HUMAN

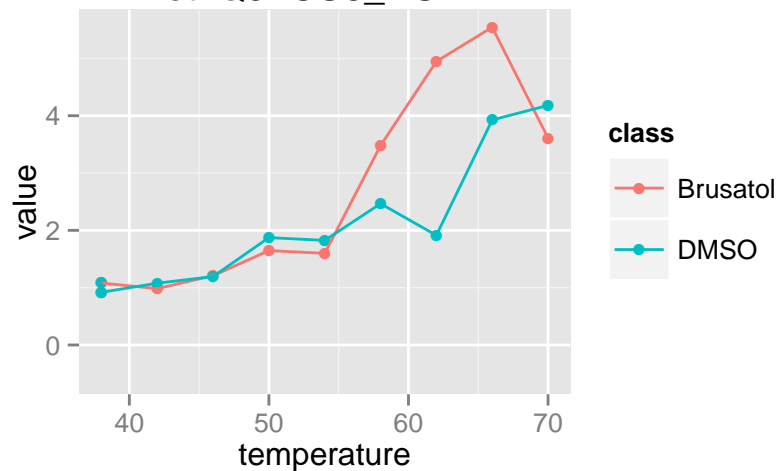

Prot: Q659B4\_HUMAN

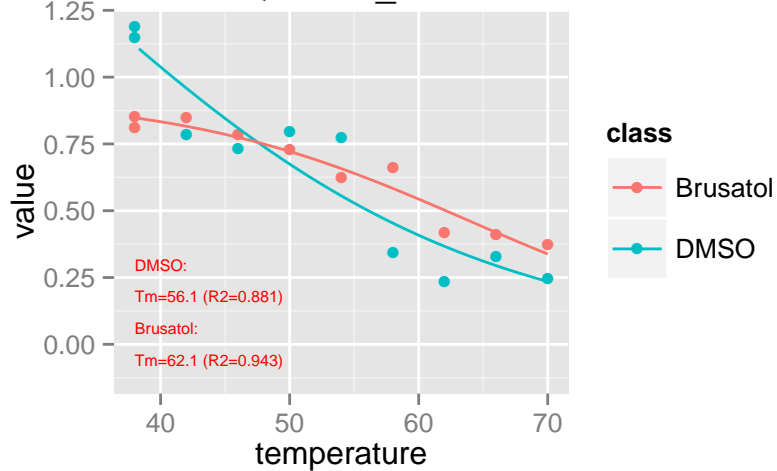

Prot: Q6IPH7\_HUMAN

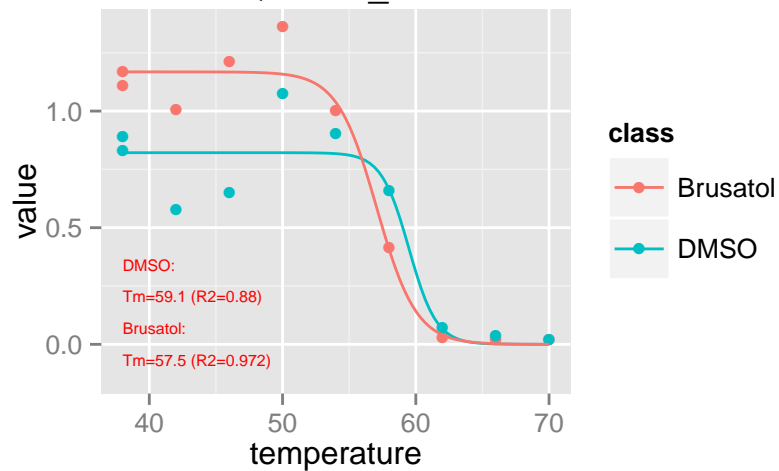

Prot: Q96DP0\_HUMAN

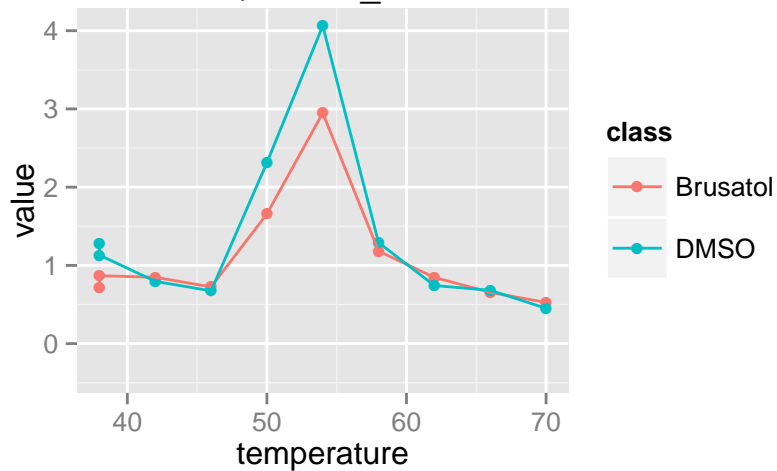

Prot: Q96GF2\_HUMAN

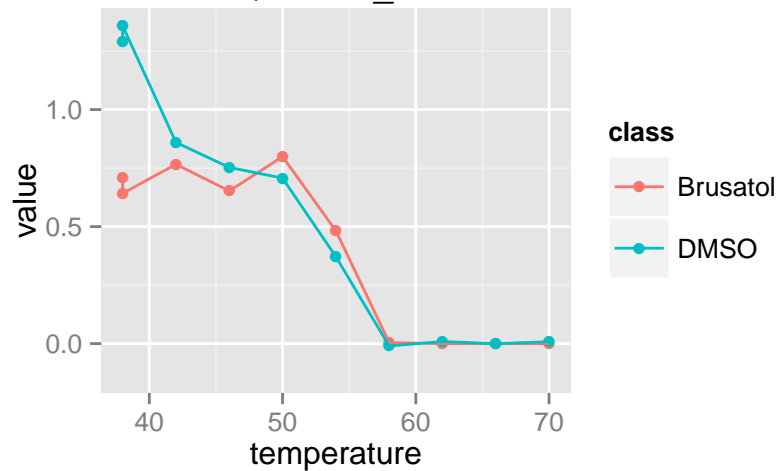

Prot: QCR1\_HUMAN

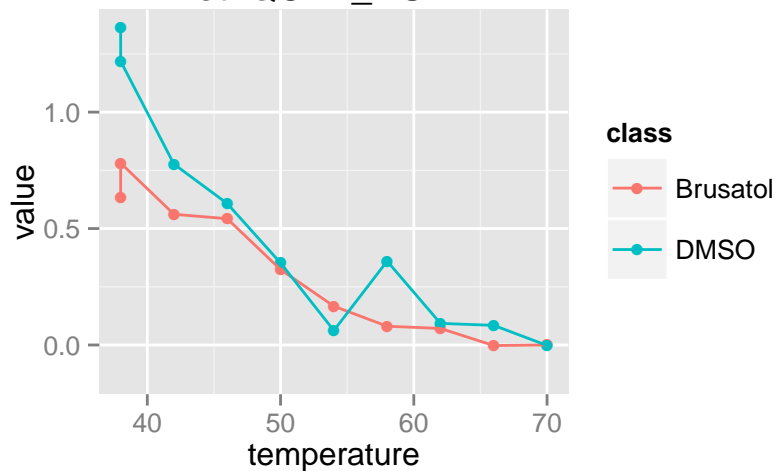

Prot: QCR2\_HUMAN

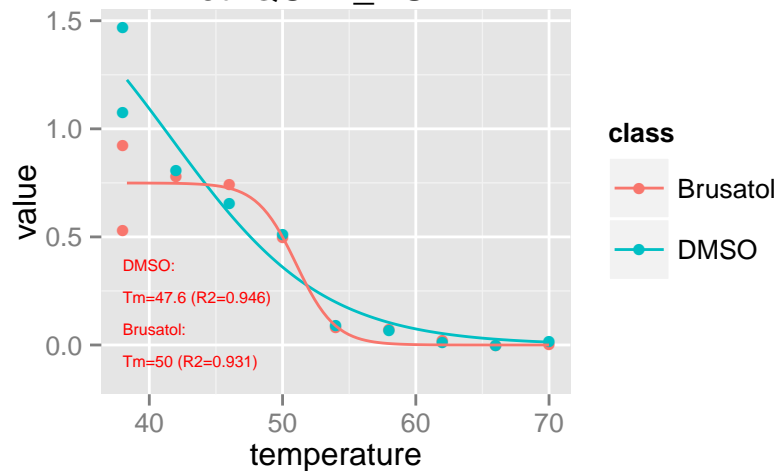

Prot: QCR6\_HUMAN

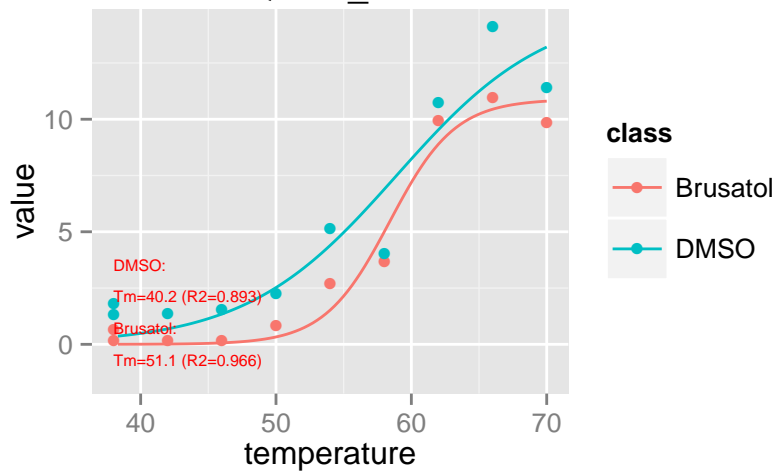

Prot: QKI\_HUMAN

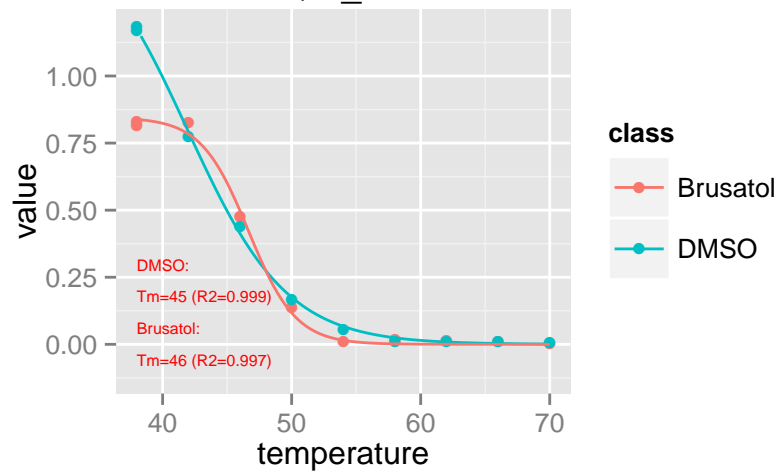

Prot: QOR\_HUMAN

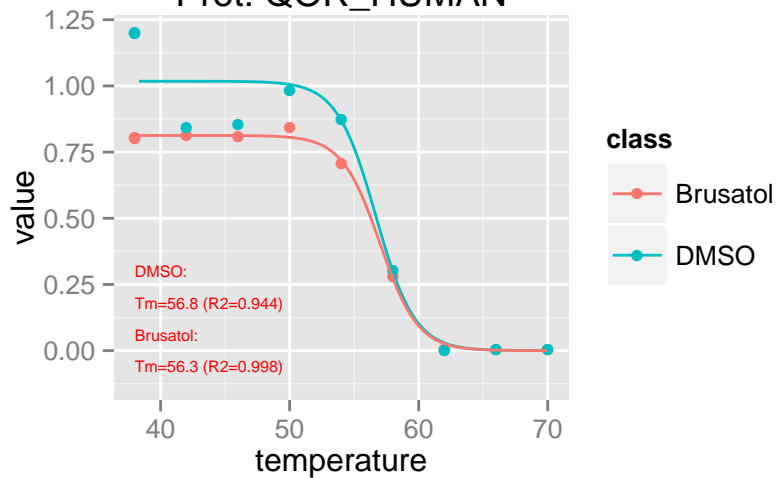

Prot: QORL1\_HUMAN

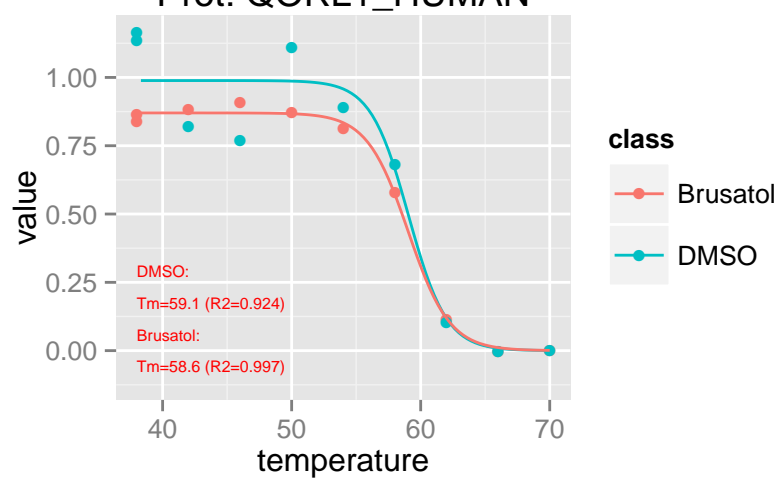

Prot: QORX\_HUMAN

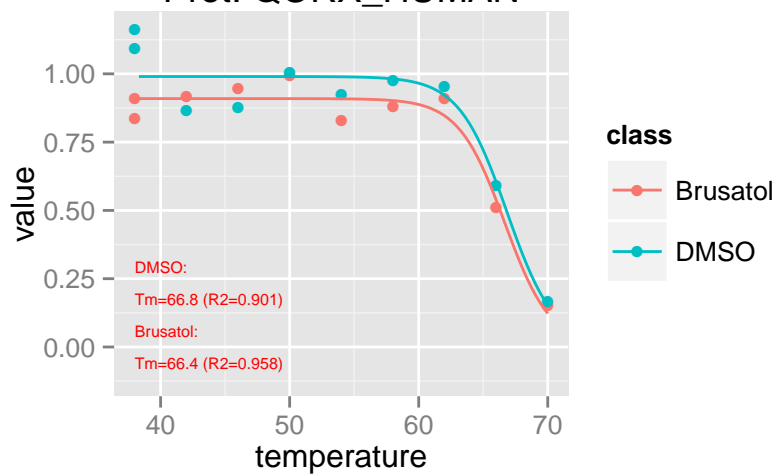

Prot: QTRD1\_HUMAN

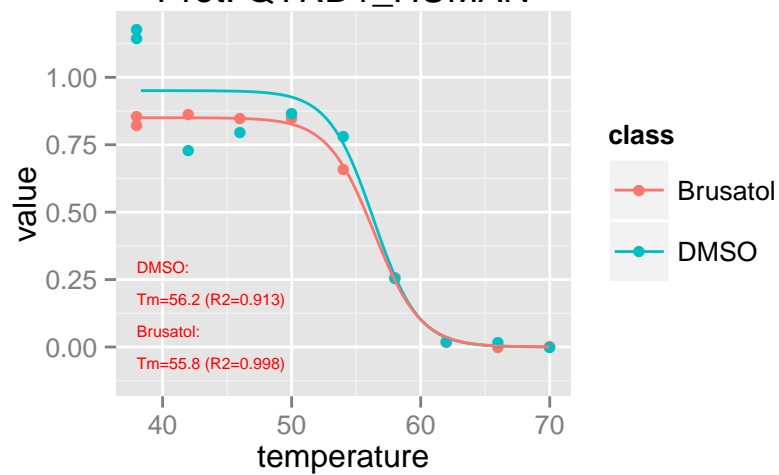

Prot: R113A\_HUMAN

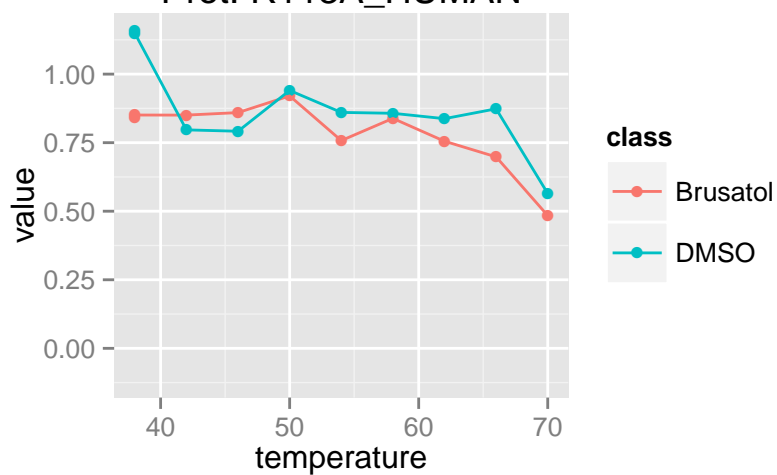

Prot: R13AX\_HUMAN

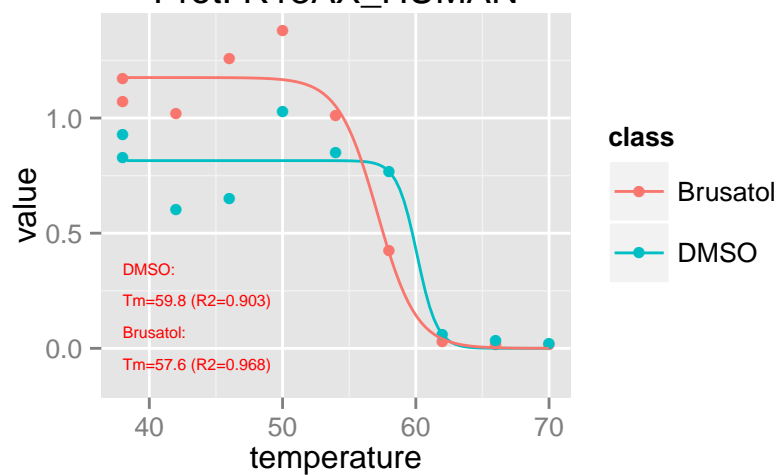



Prot: RA1L2\_HUMAN

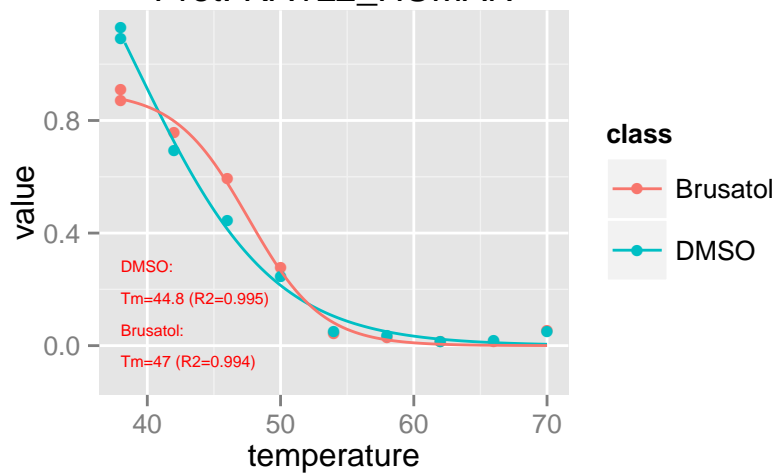

Prot: RAB10\_HUMAN

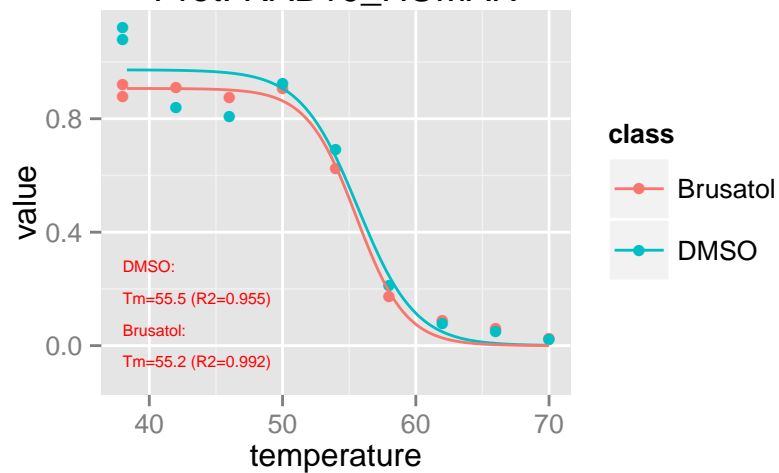

Prot: RAB12\_HUMAN

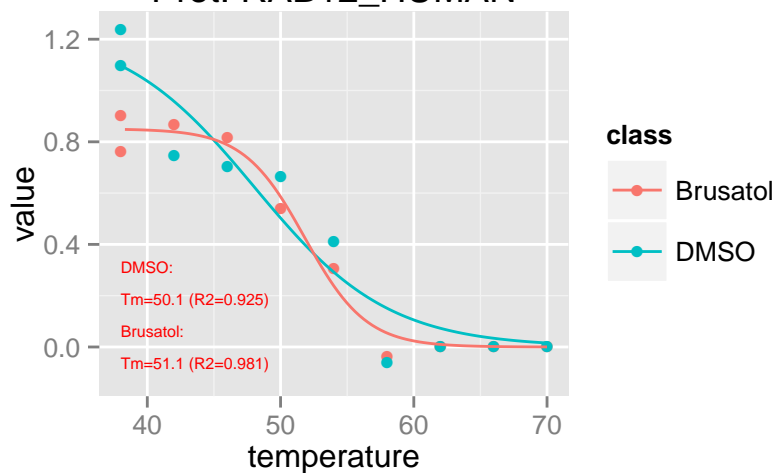

Prot: RAB13\_HUMAN

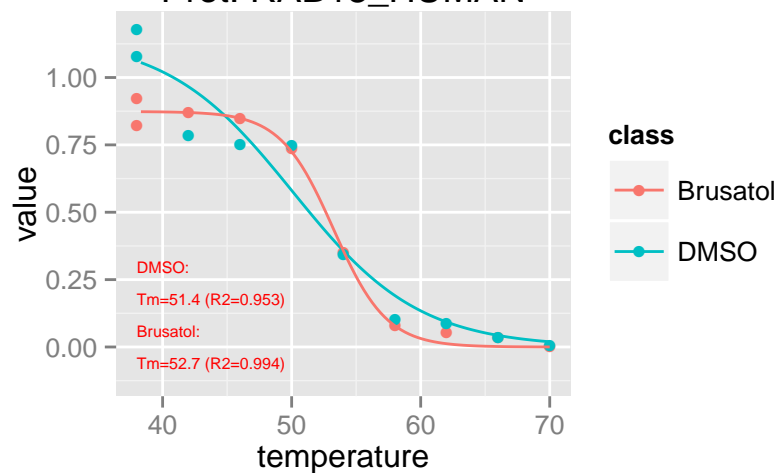

Prot: RAB14\_HUMAN

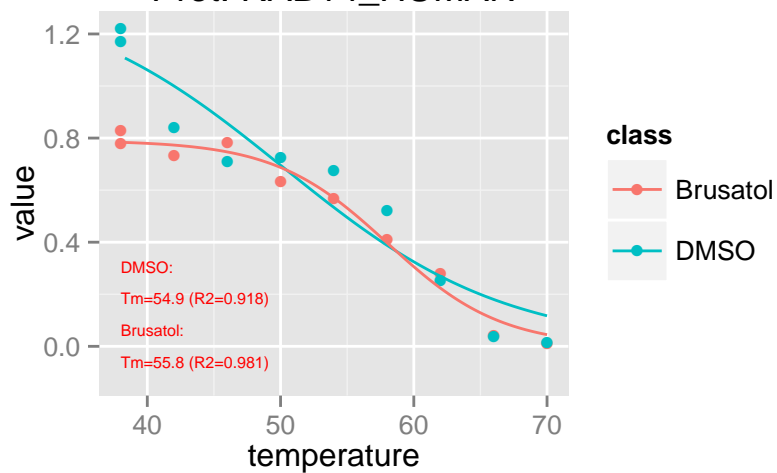

Prot: RAB18\_HUMAN

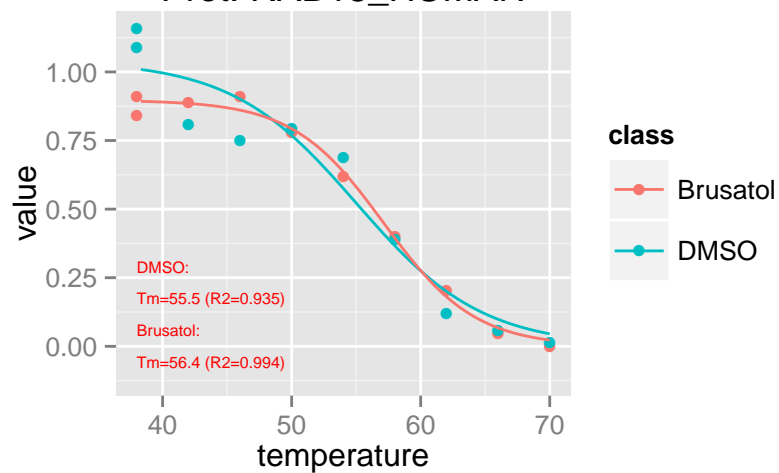

Prot: RAB1A\_HUMAN

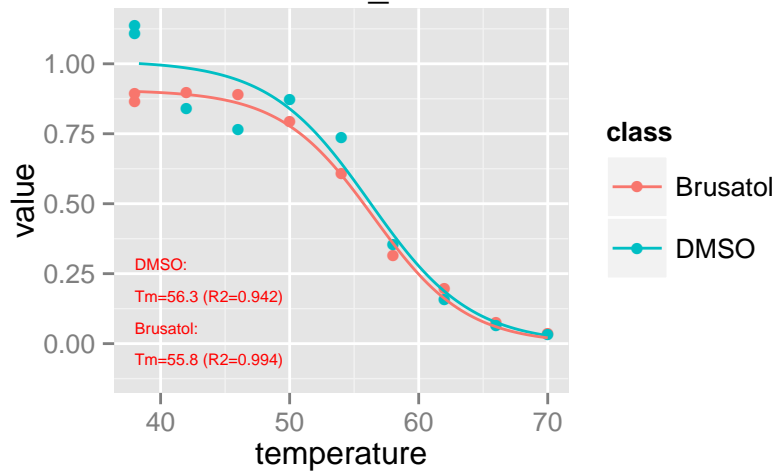

Prot: RAB1B\_HUMAN

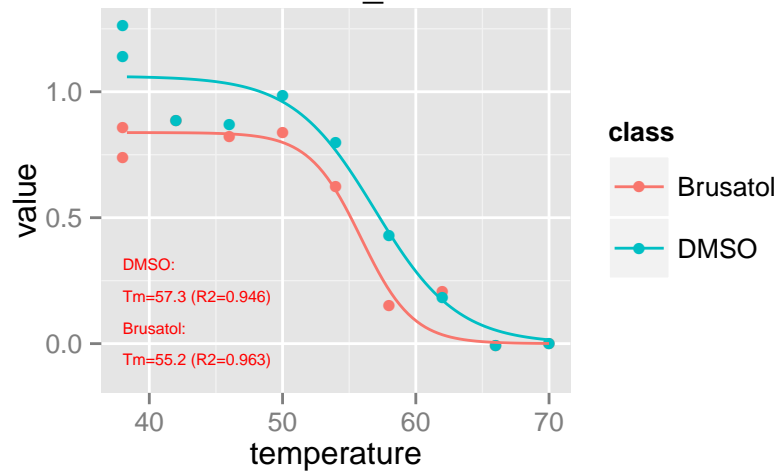

Prot: RAB21\_HUMAN

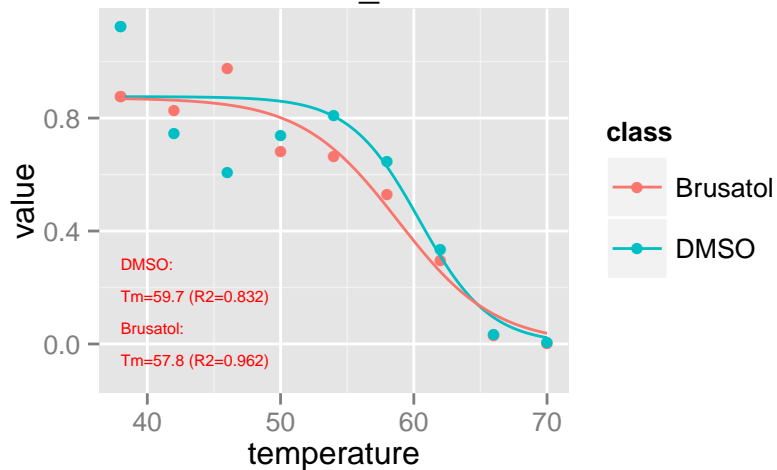

Prot: RAB2A\_HUMAN

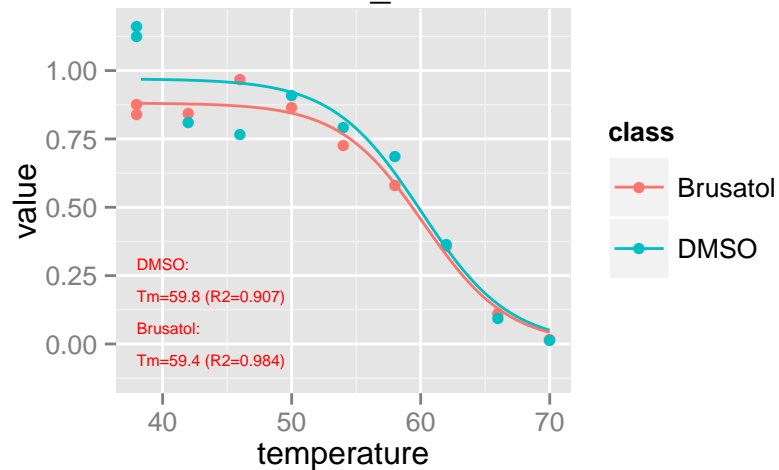

Prot: RAB34\_HUMAN

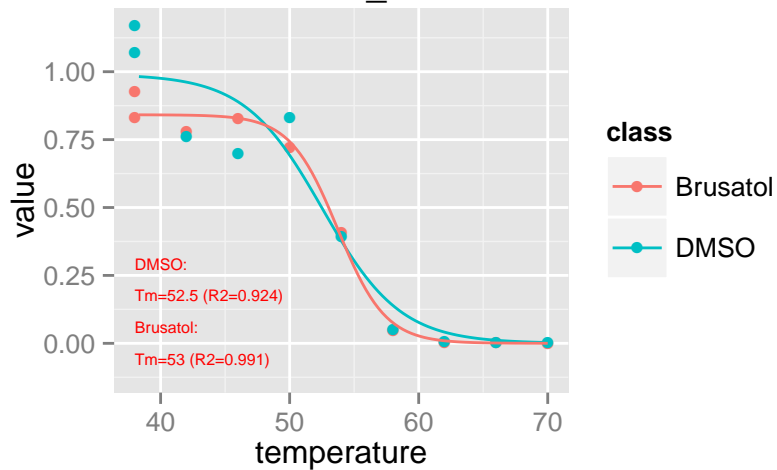

Prot: RAB35\_HUMAN

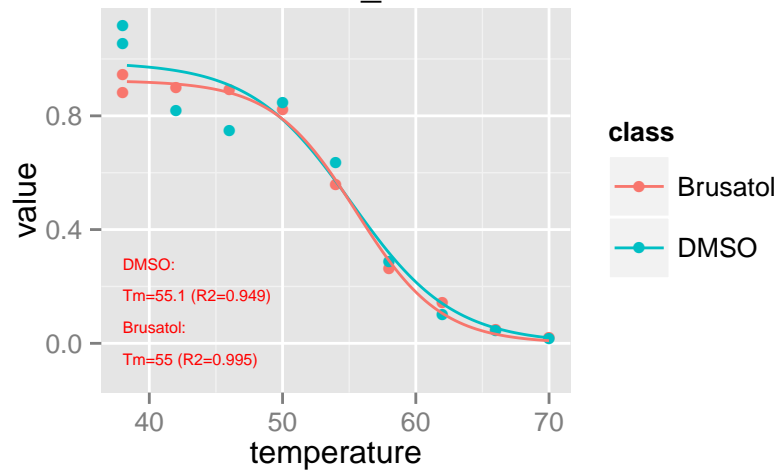

Prot: RAB4A\_HUMAN

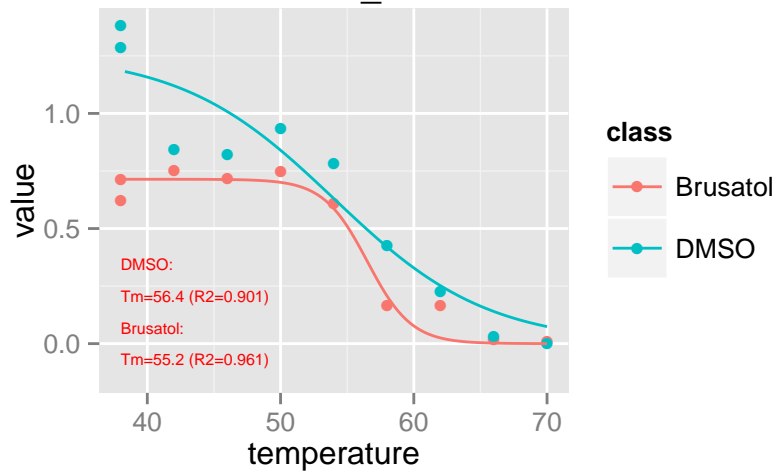

Prot: RAB5A\_HUMAN

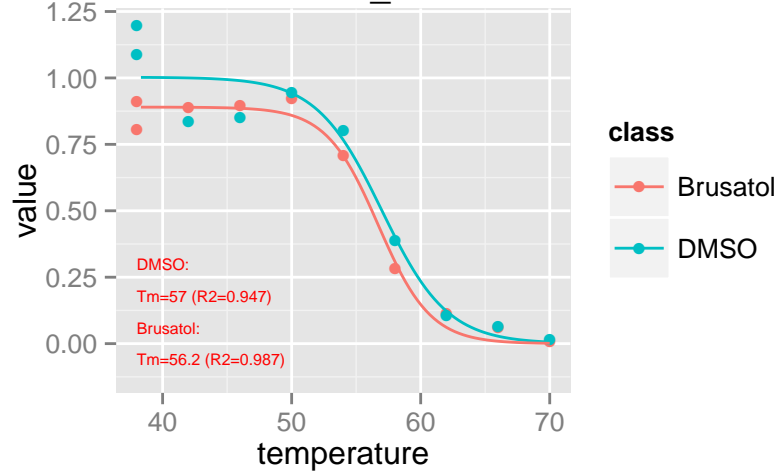

Prot: RAB5B\_HUMAN

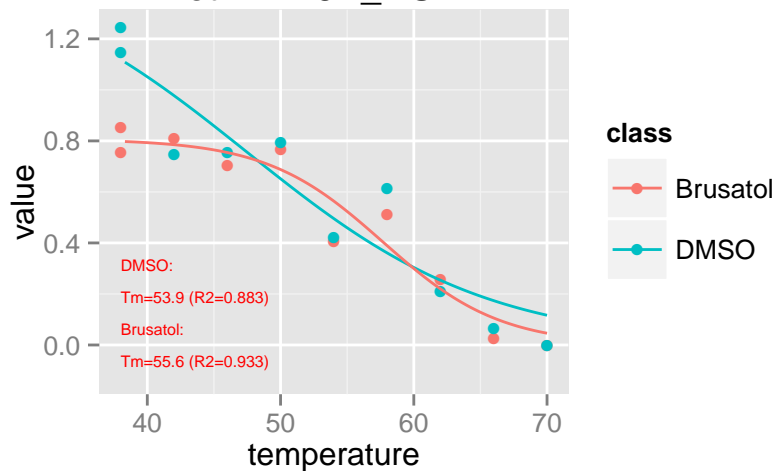

Prot: RAB5C\_HUMAN

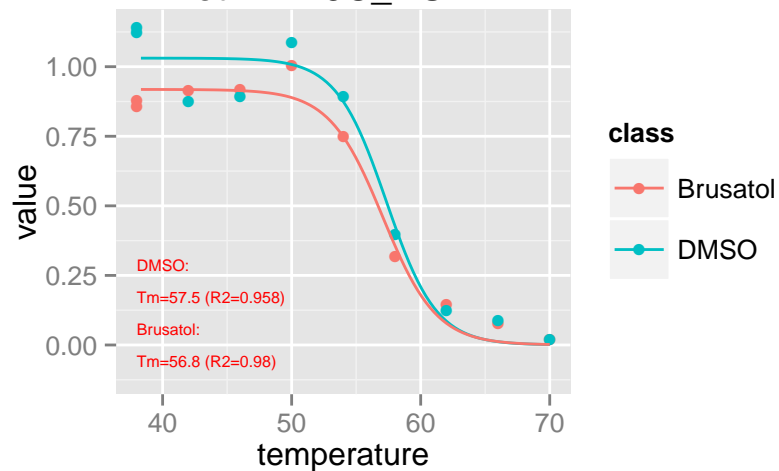

Prot: RAB7A\_HUMAN

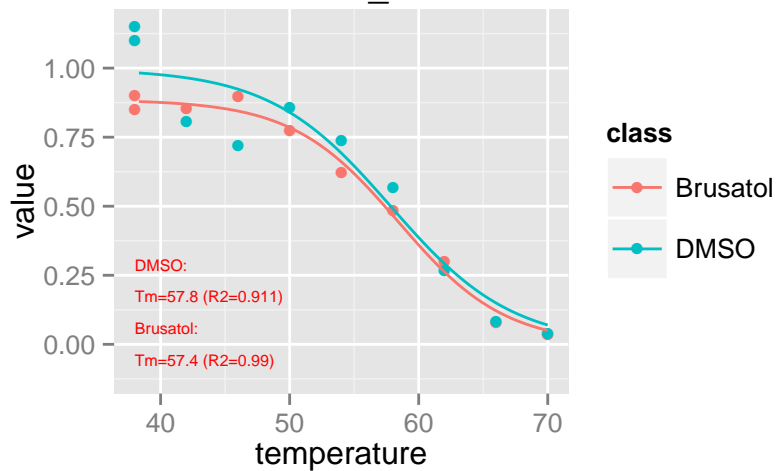

Prot: RAB8A\_HUMAN

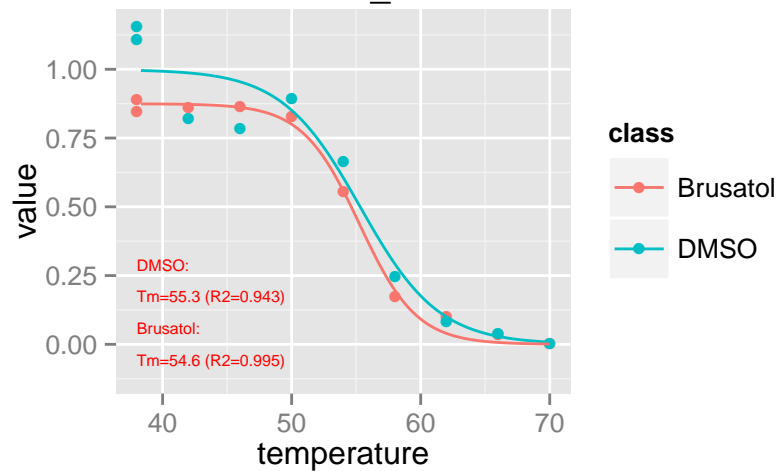

Prot: RAB8B\_HUMAN

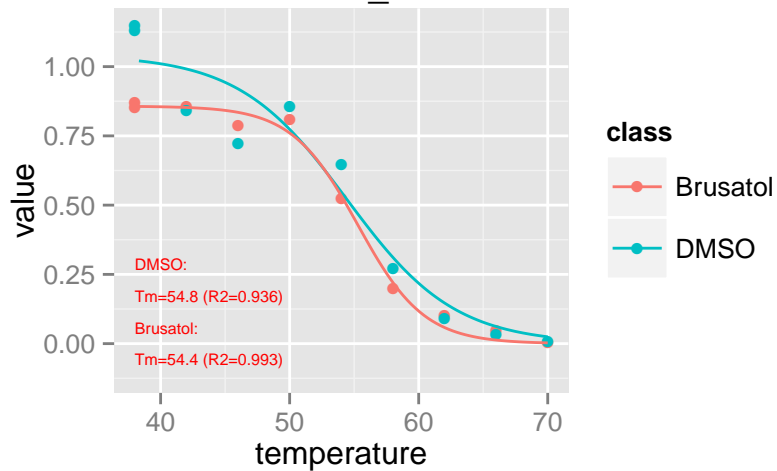

Prot: RABE1\_HUMAN

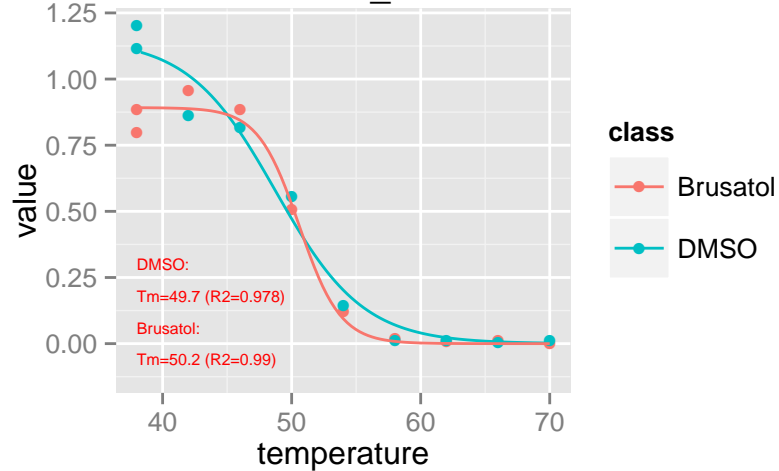

Prot: RABE2\_HUMAN

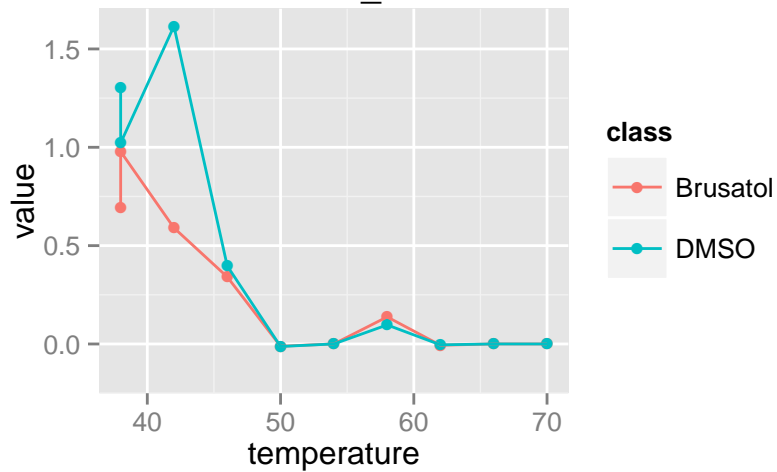

Prot: RABEK\_HUMAN

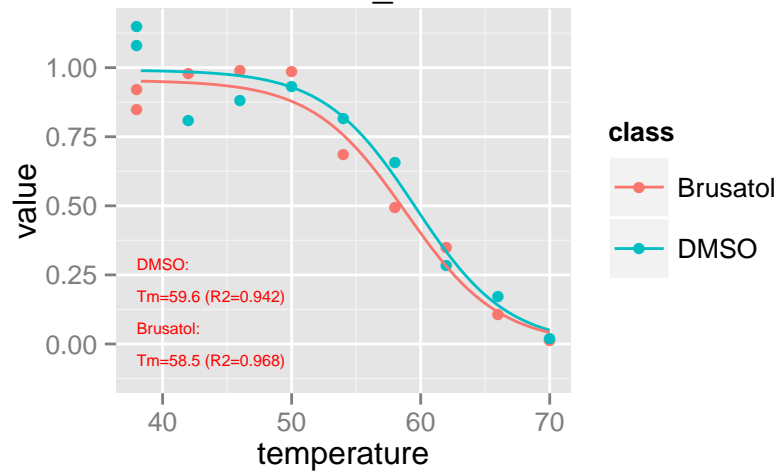

Prot: RAC1\_HUMAN

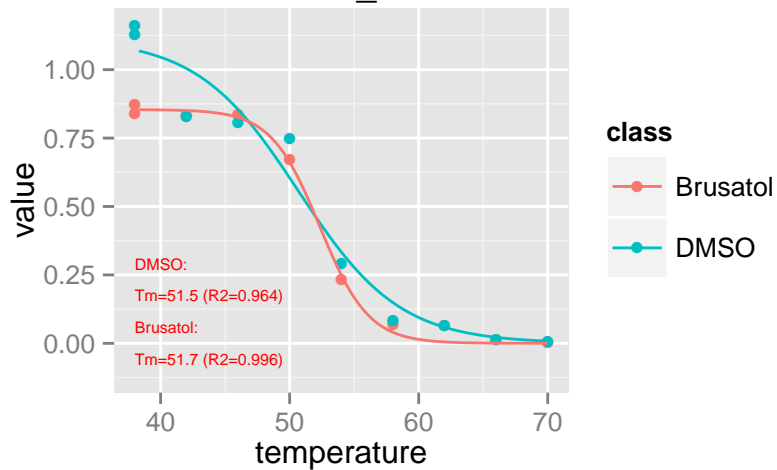

Prot: RAD18\_HUMAN

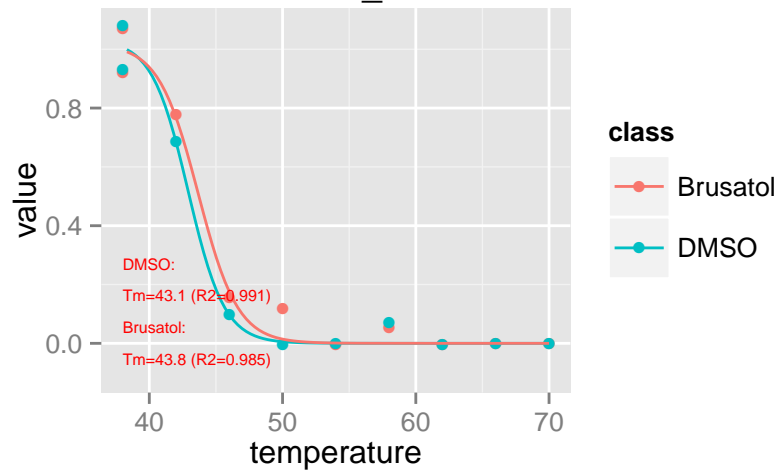

Prot: RAD50\_HUMAN

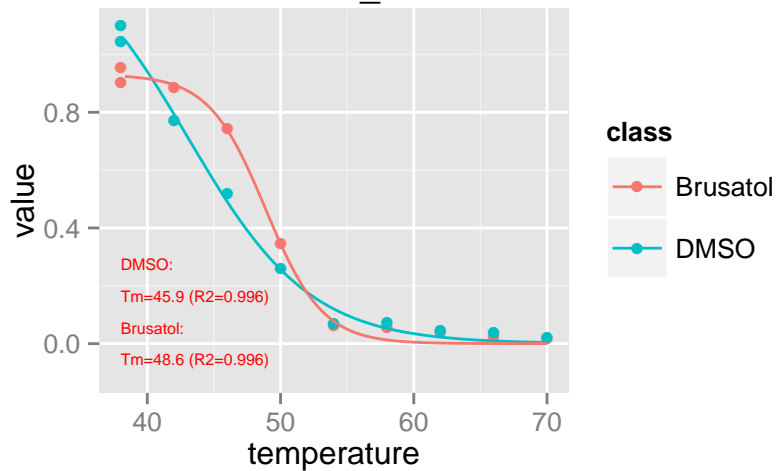

Prot: RAD1\_HUMAN

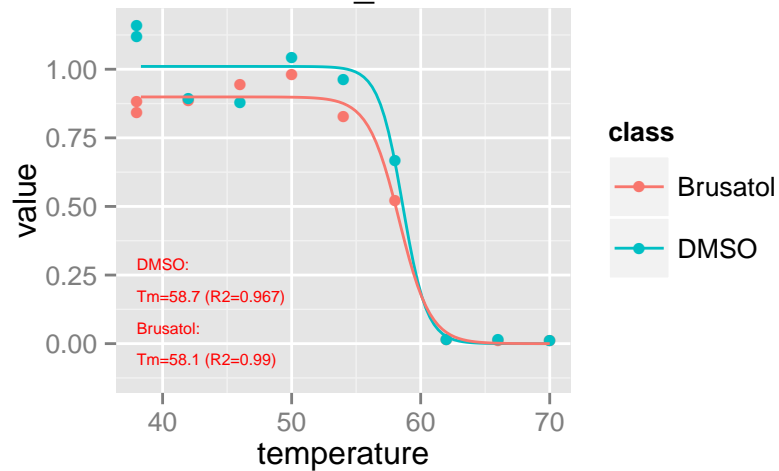

Prot: RAE1\_HUMAN

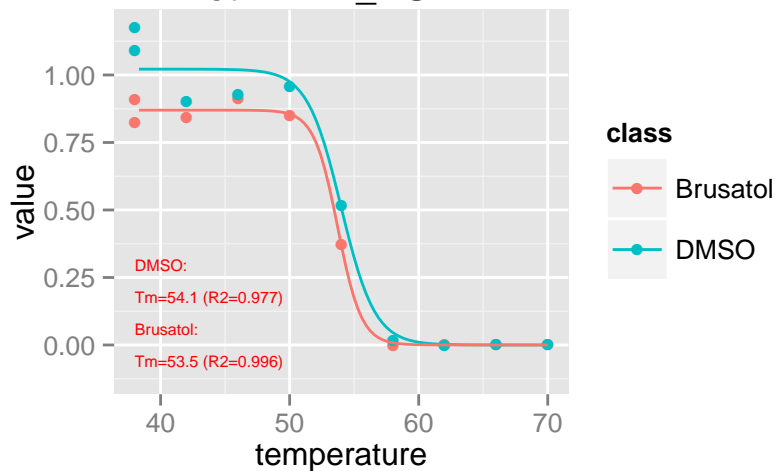

Prot: RAE1L\_HUMAN

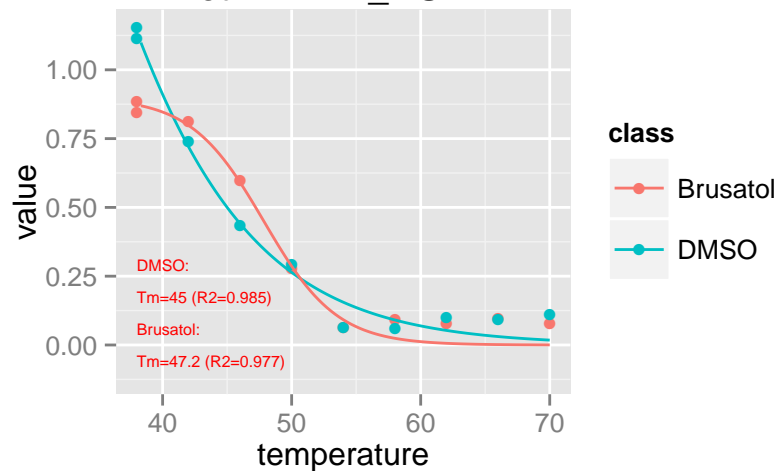

Prot: RAGP1\_HUMAN

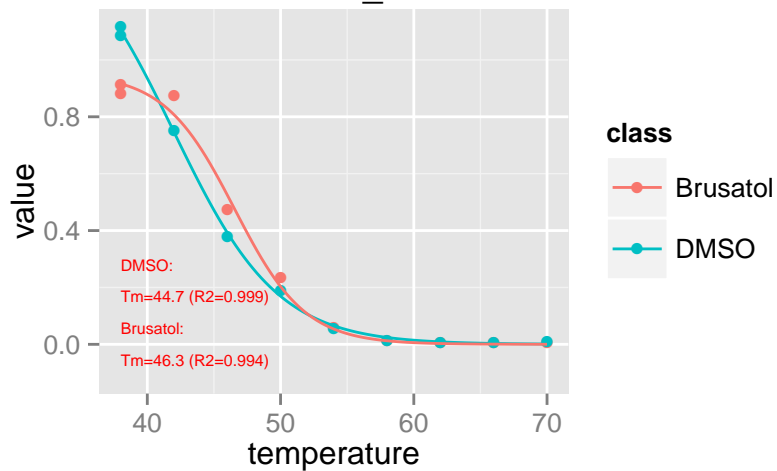

Prot: RAI14\_HUMAN

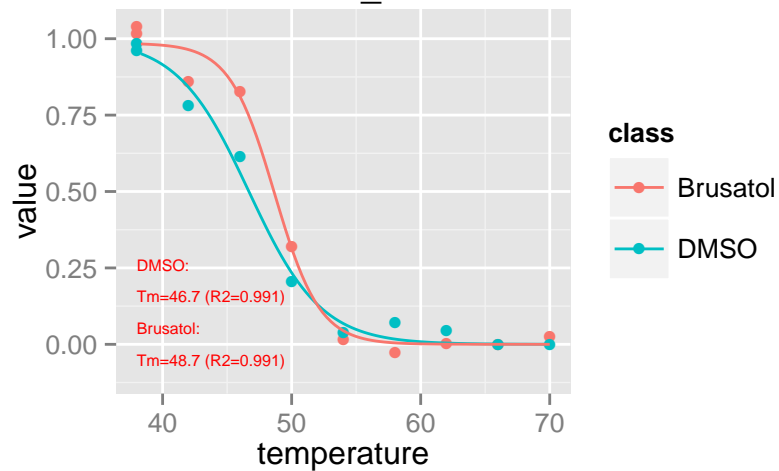

Prot: RALY\_HUMAN

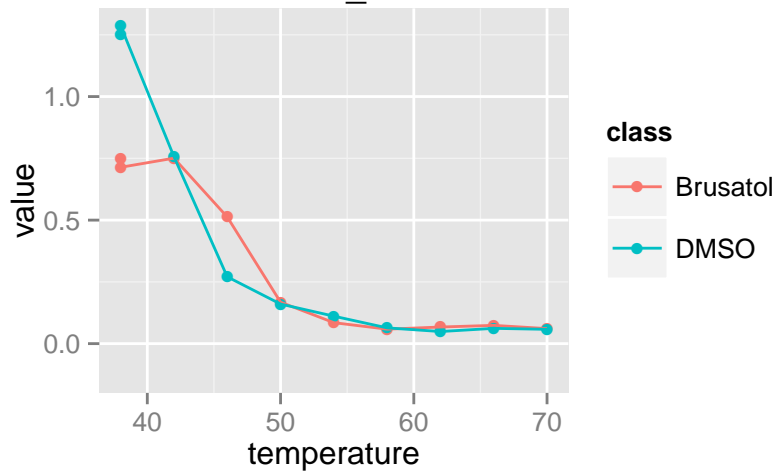

Prot: RAN\_HUMAN

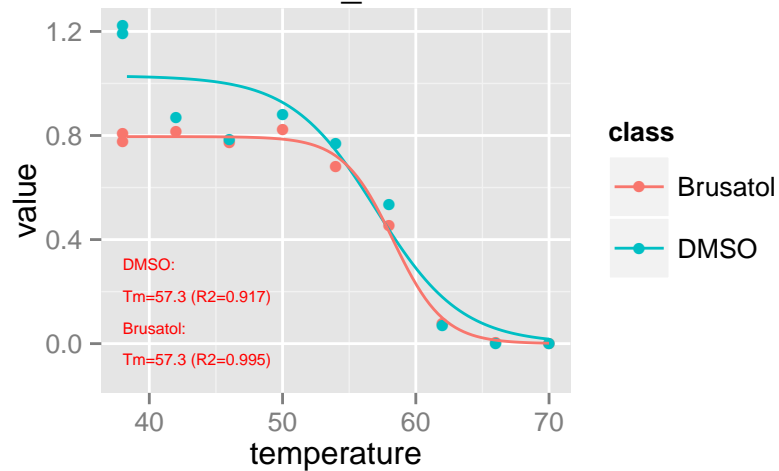

Prot: RANB3\_HUMAN

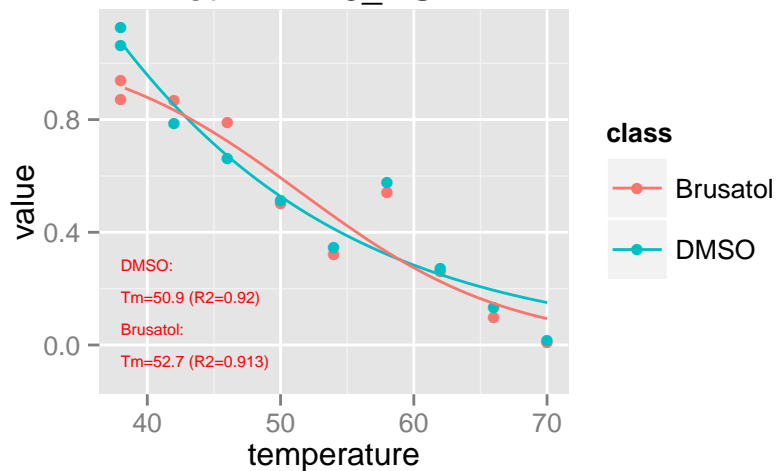

Prot: RANB9\_HUMAN

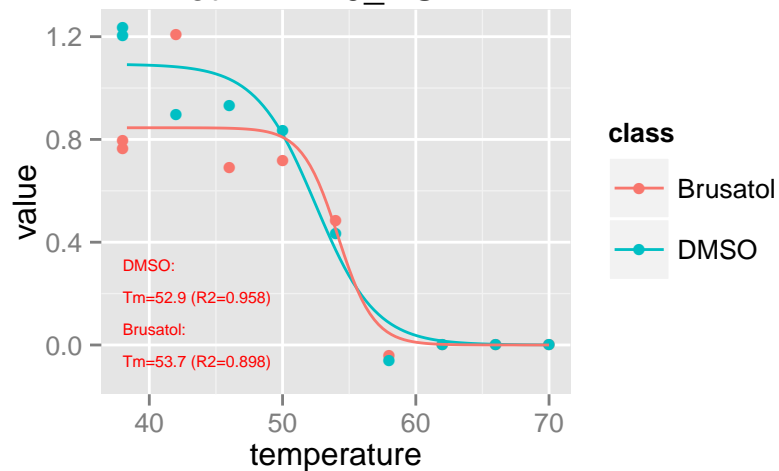

Prot: RANG\_HUMAN

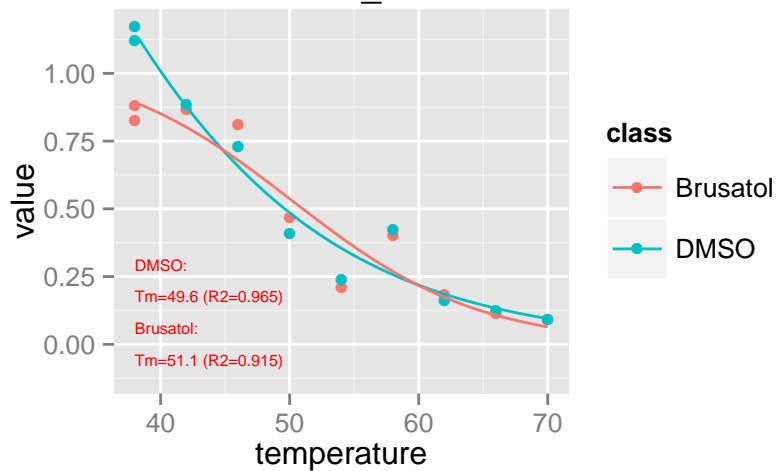

Prot: RAP1A\_HUMAN

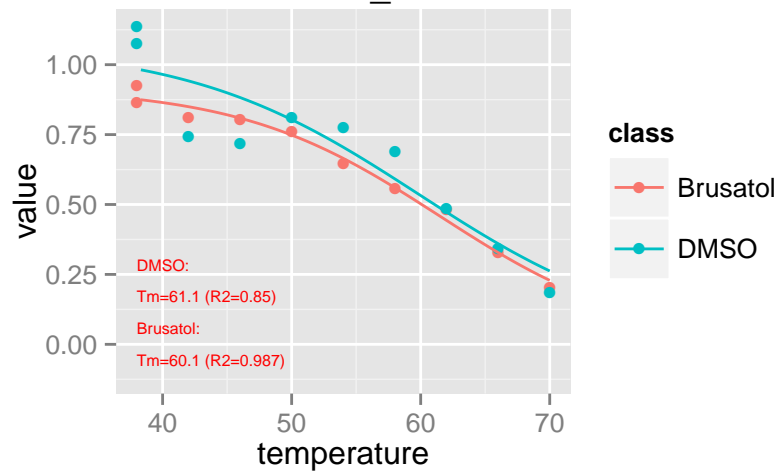

Prot: RAP1B\_HUMAN

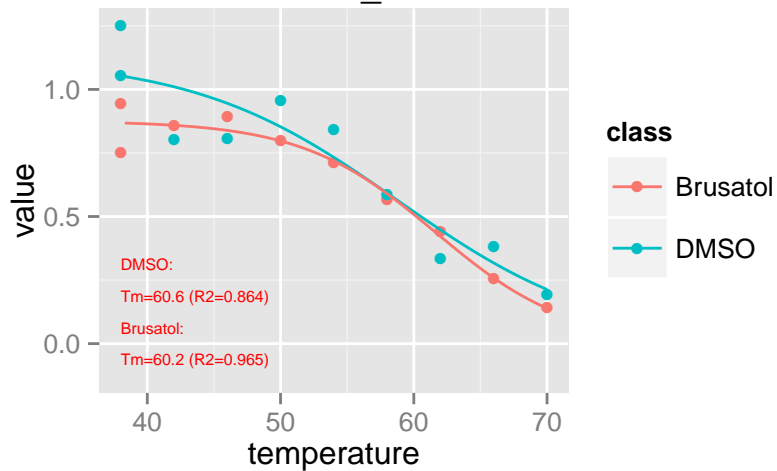

Prot: RASA1\_HUMAN

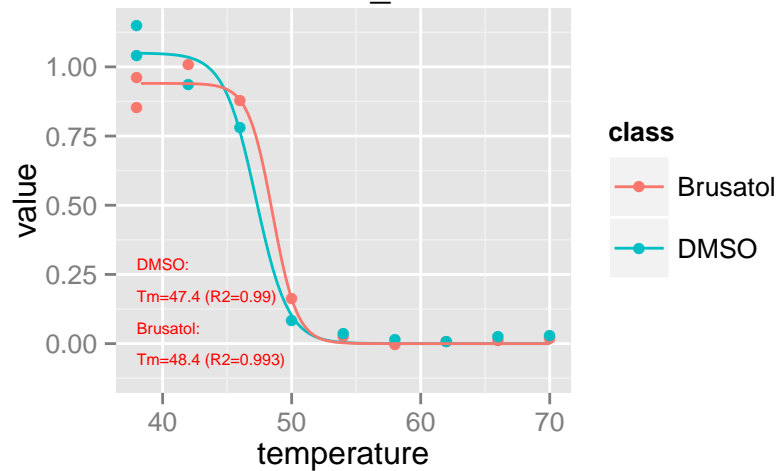

Prot: RASF2\_HUMAN

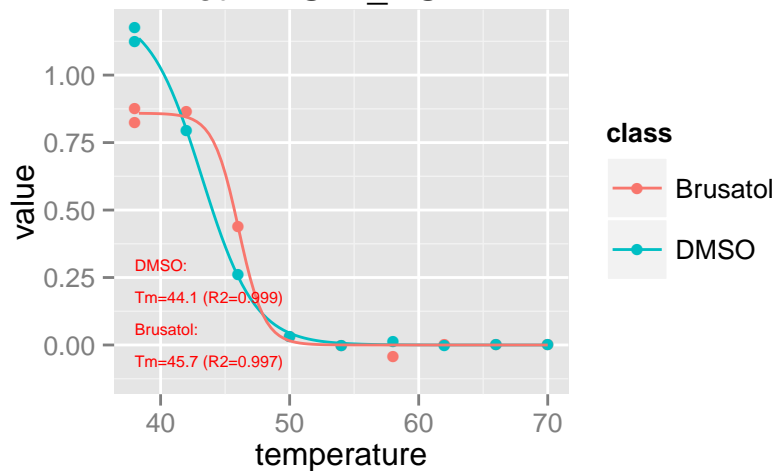

Prot: RASH\_HUMAN

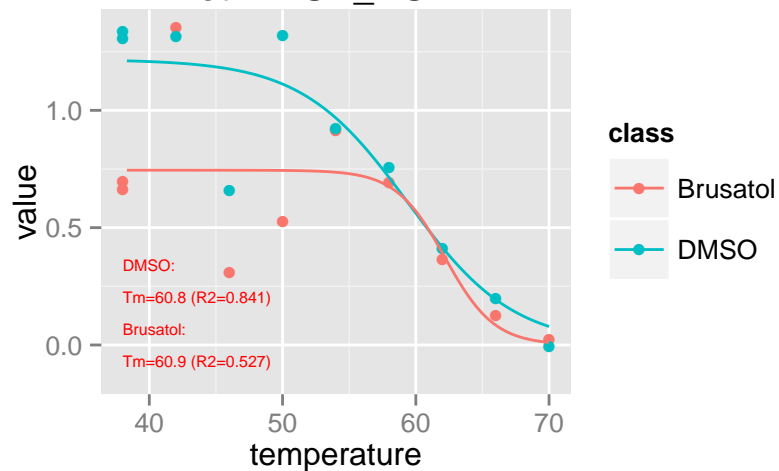

Prot: RAVR1\_HUMAN

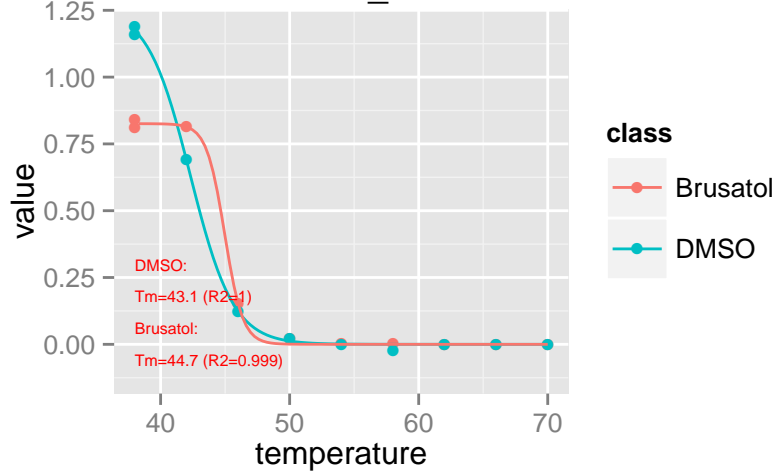

Prot: RB\_HUMAN

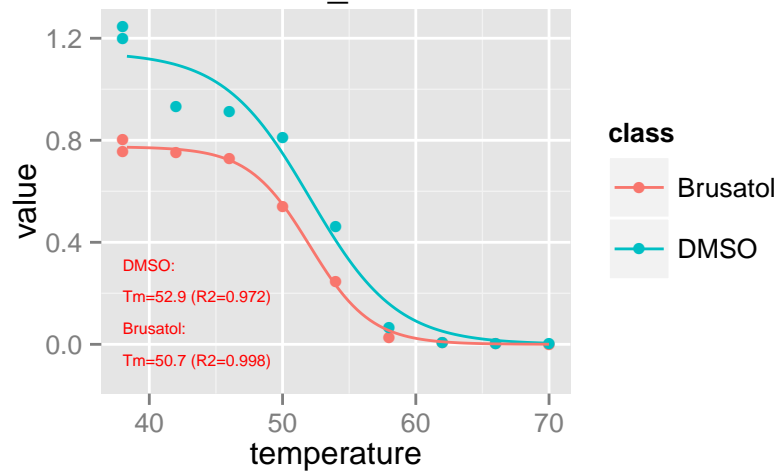

Prot: RB11A\_HUMAN

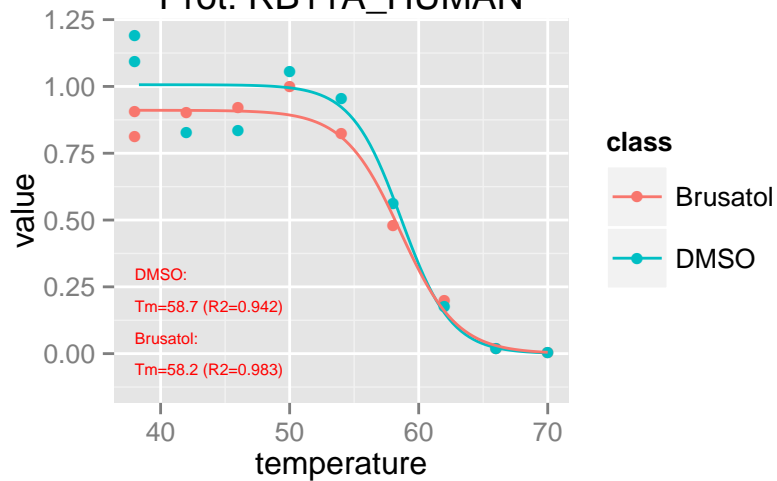

Prot: RB11B\_HUMAN

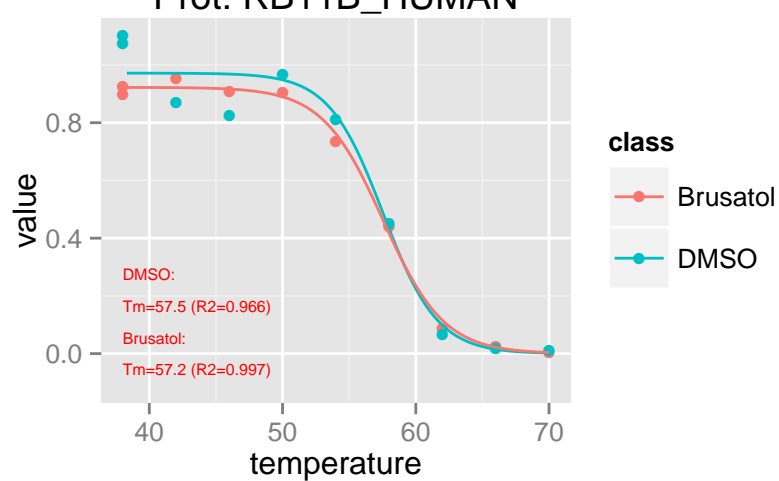

Prot: RB27B\_HUMAN

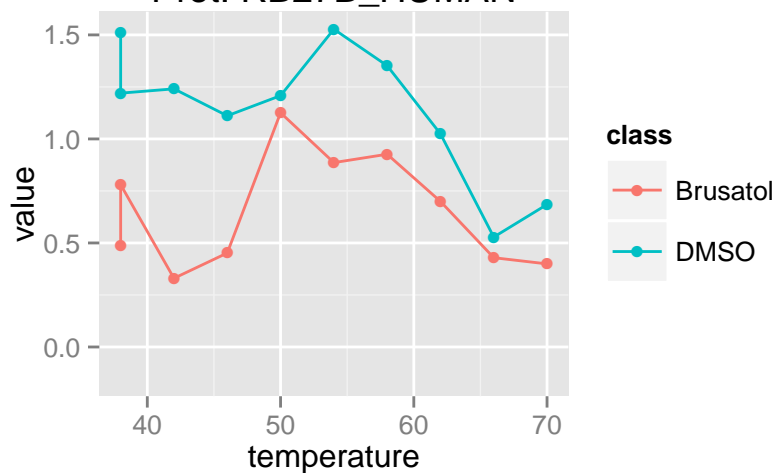

Prot: RB3GP\_HUMAN

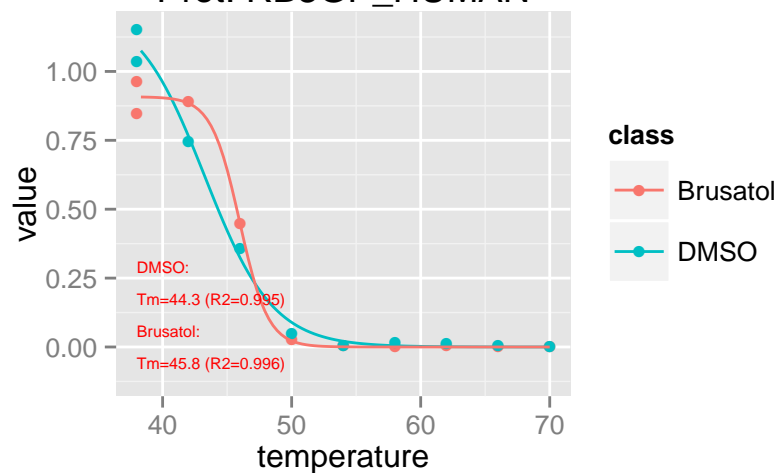

Prot: RB6I2\_HUMAN

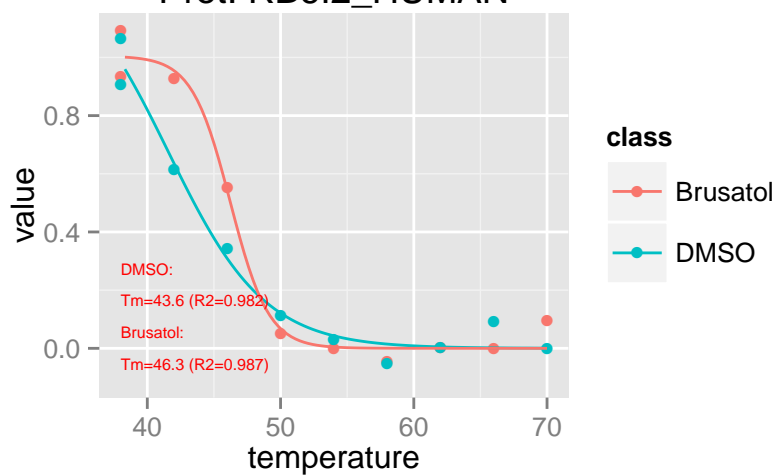

Prot: RBBP4\_HUMAN

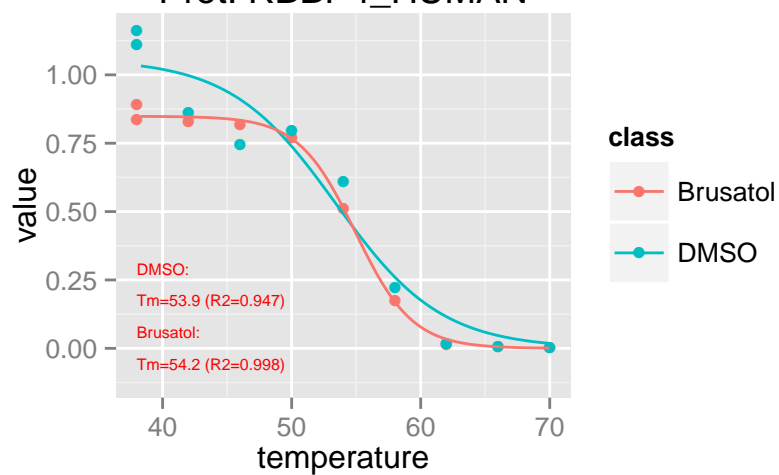



Prot: RBBP5\_HUMAN

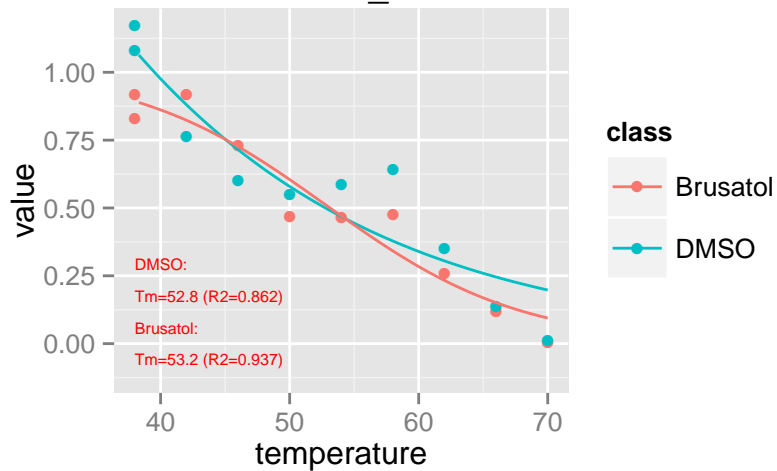

Prot: RBBP6\_HUMAN

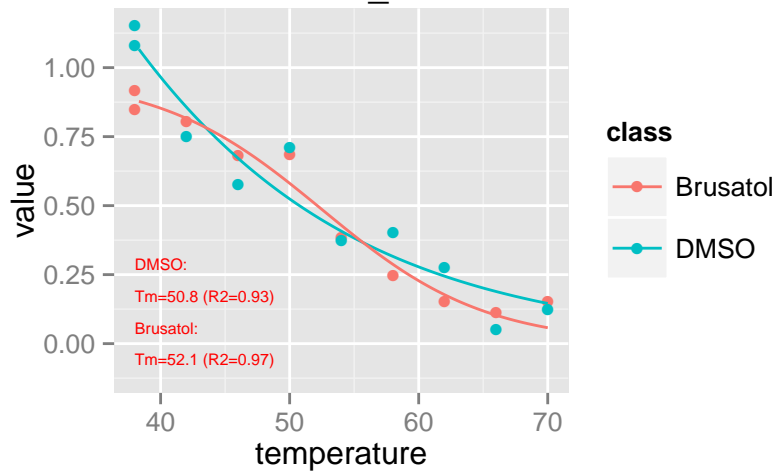

Prot: RBBP7\_HUMAN

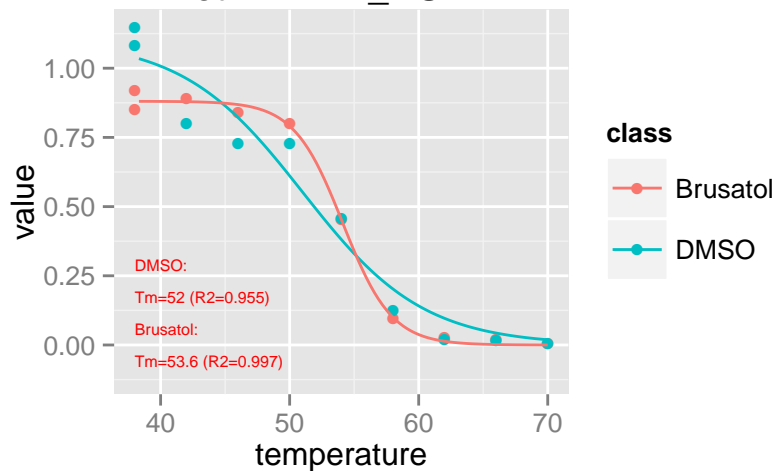

Prot: RBBP9\_HUMAN

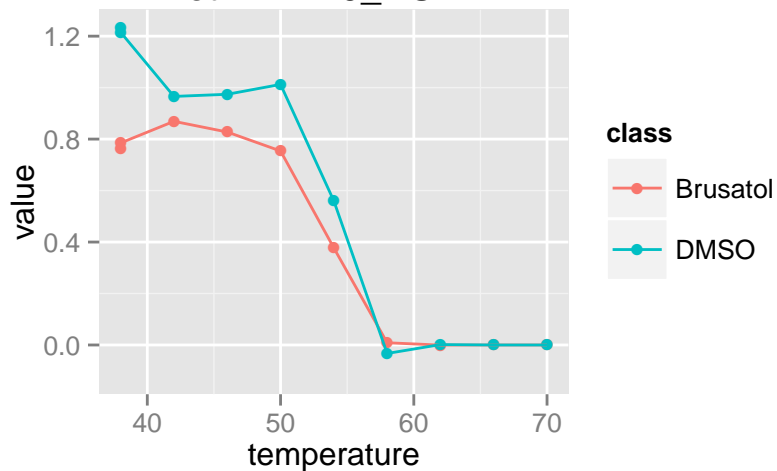

Prot: RBGP1\_HUMAN

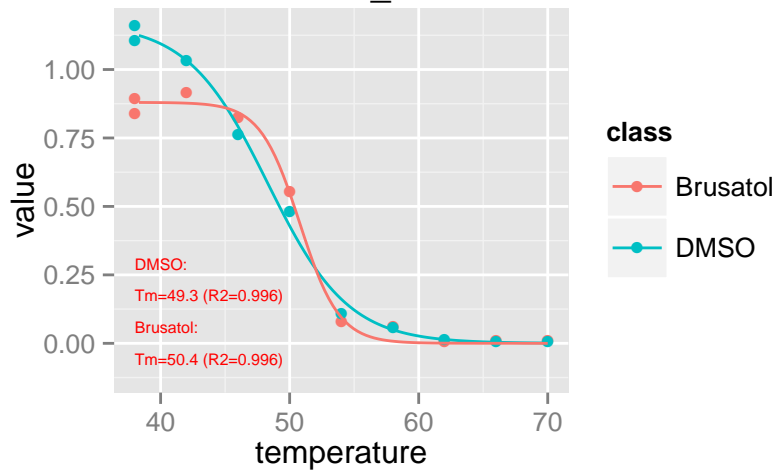

Prot: RBGPR\_HUMAN

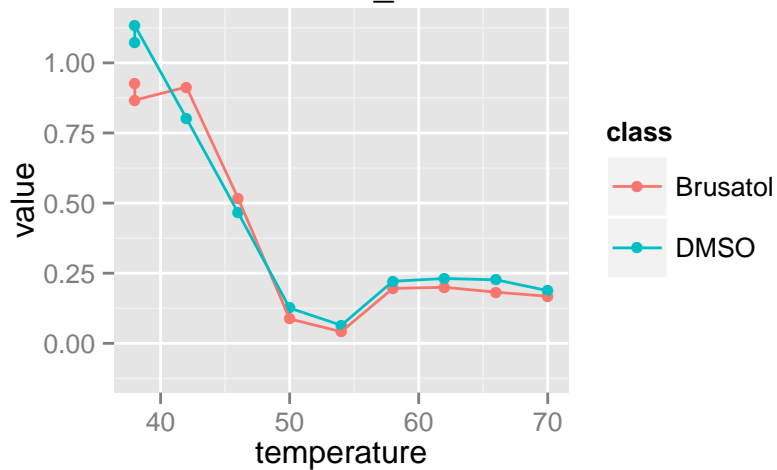

Prot: RBM12\_HUMAN

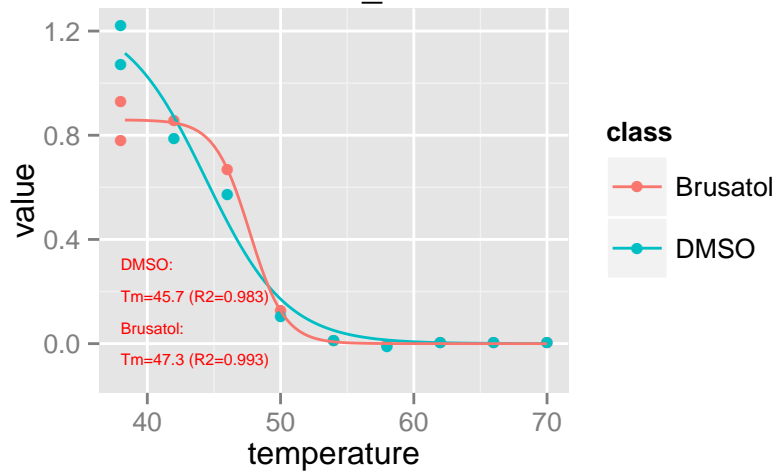

Prot: RBM14\_HUMAN

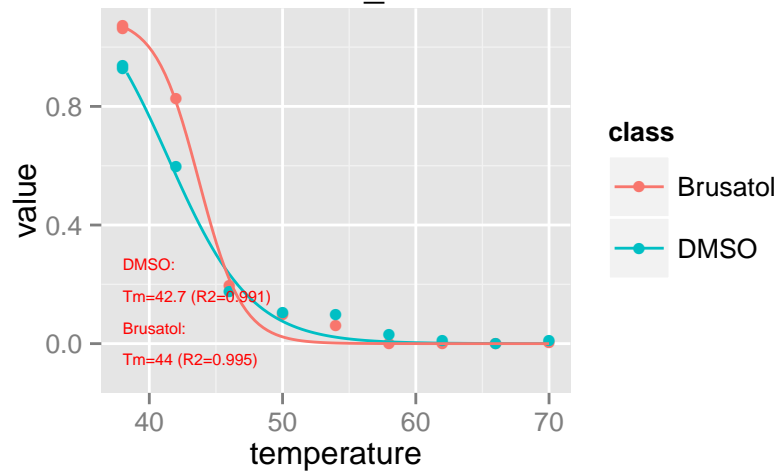

Prot: RBM22\_HUMAN

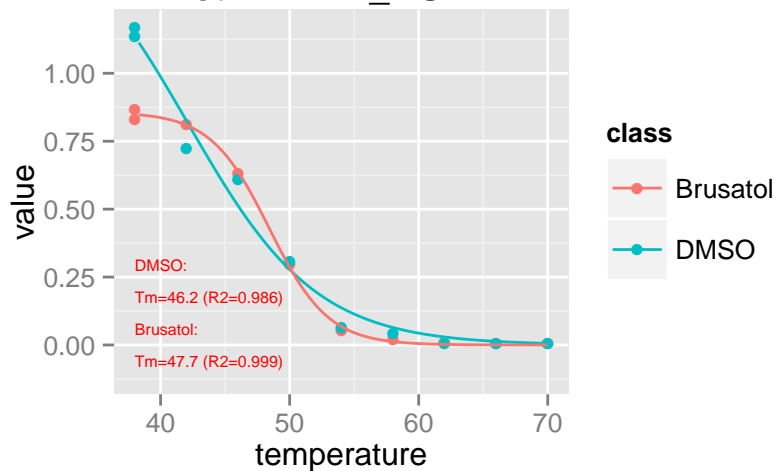

Prot: RBM25\_HUMAN

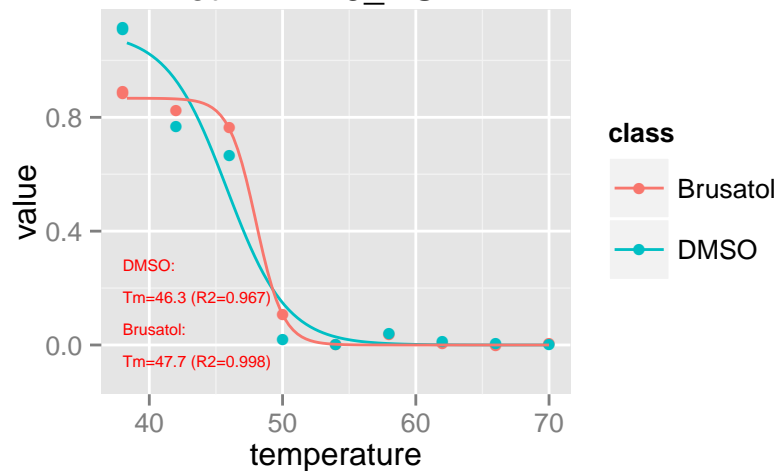

Prot: RBM27\_HUMAN

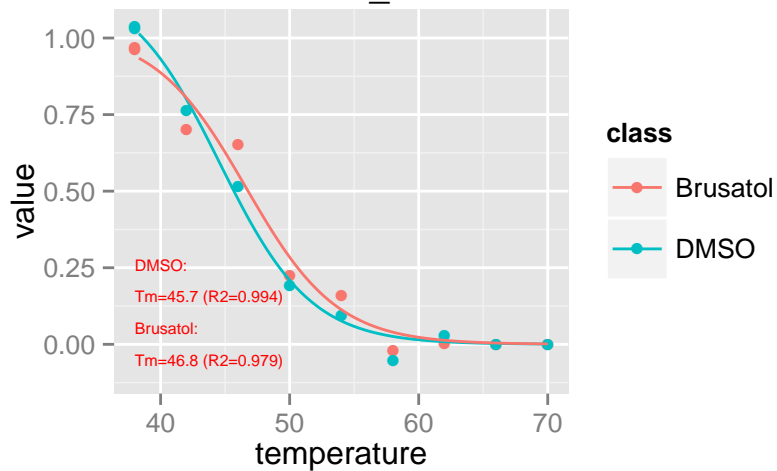

Prot: RBM28\_HUMAN

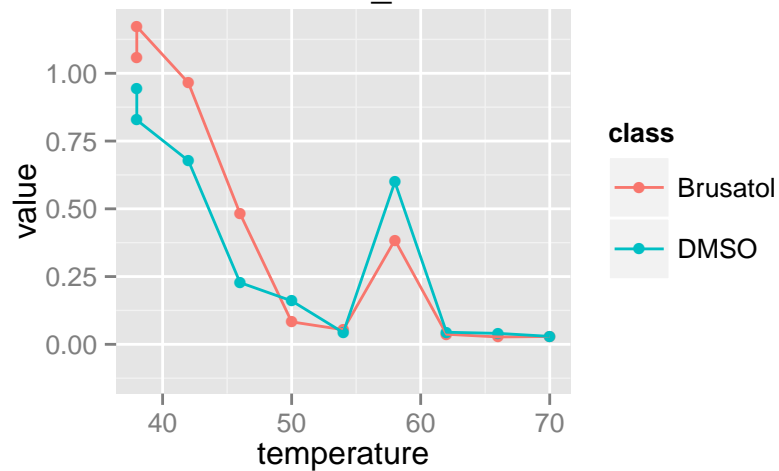

Prot: RBM3\_HUMAN

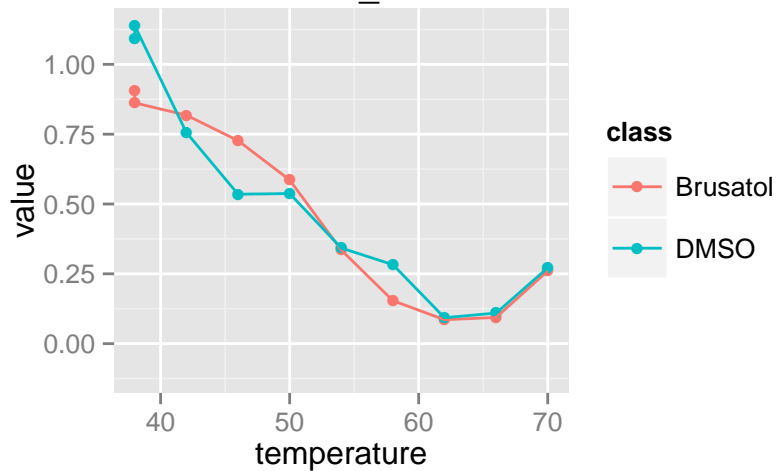

Prot: RBM33\_HUMAN

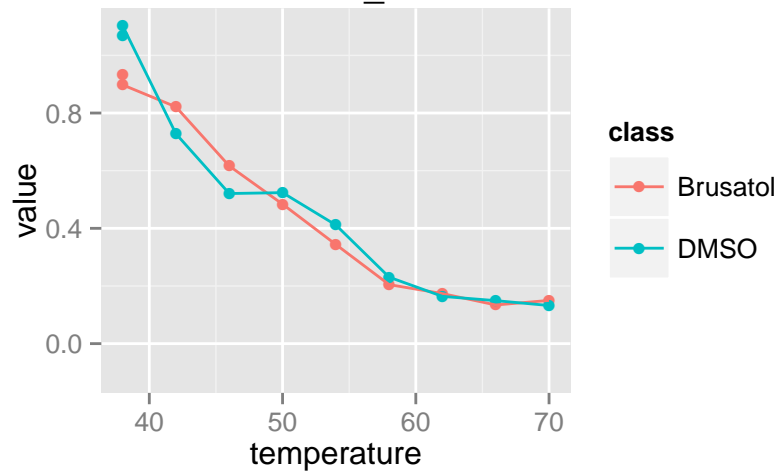

Prot: RBM39\_HUMAN

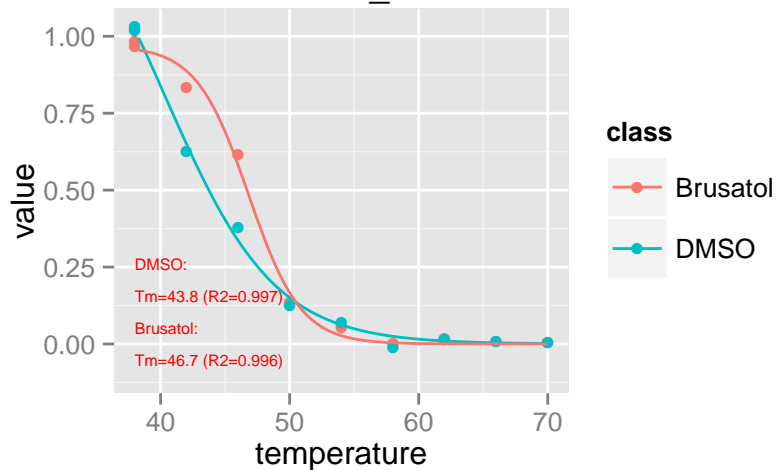

Prot: RBM42\_HUMAN

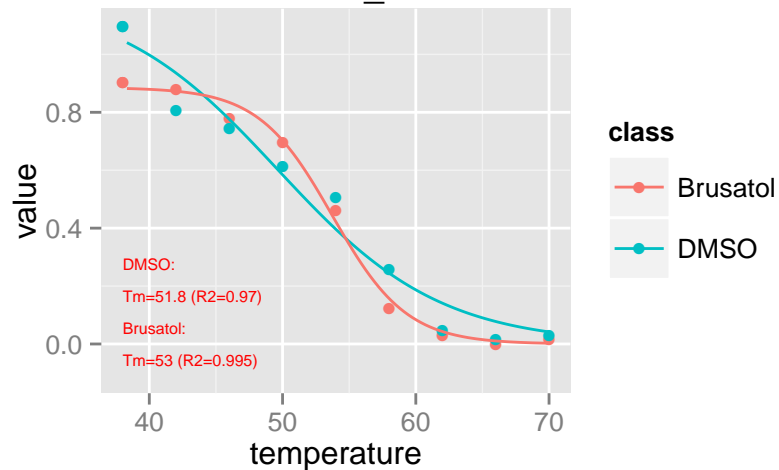

Prot: RBM4B\_HUMAN

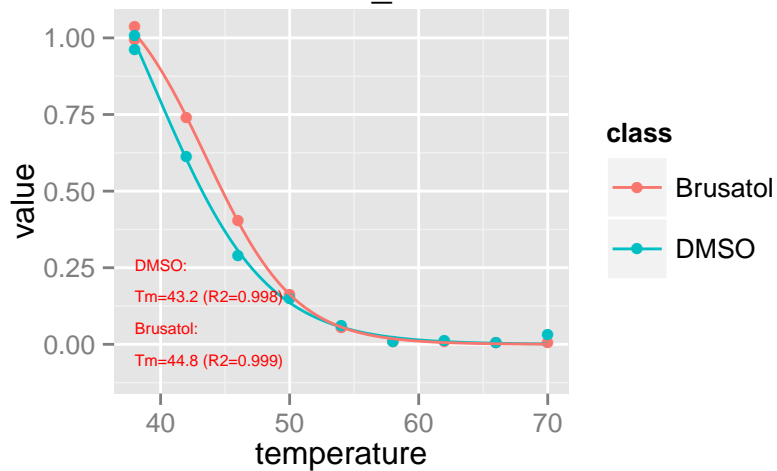

Prot: RBM8A\_HUMAN

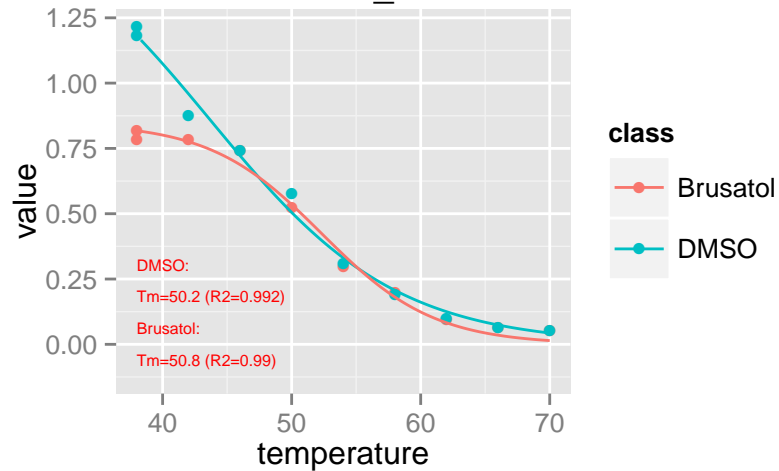

Prot: RBP10\_HUMAN

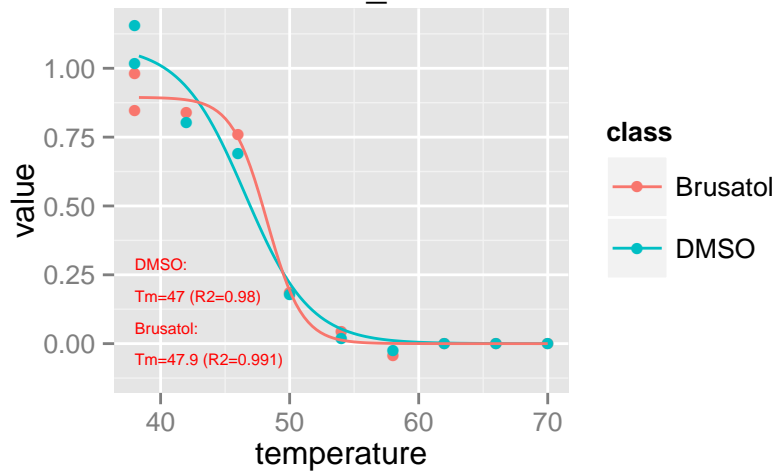

Prot: RBP2\_HUMAN

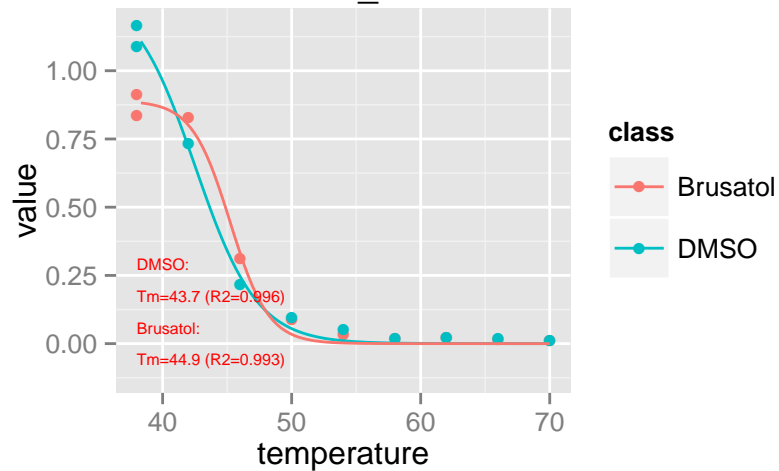

Prot: RBP56\_HUMAN

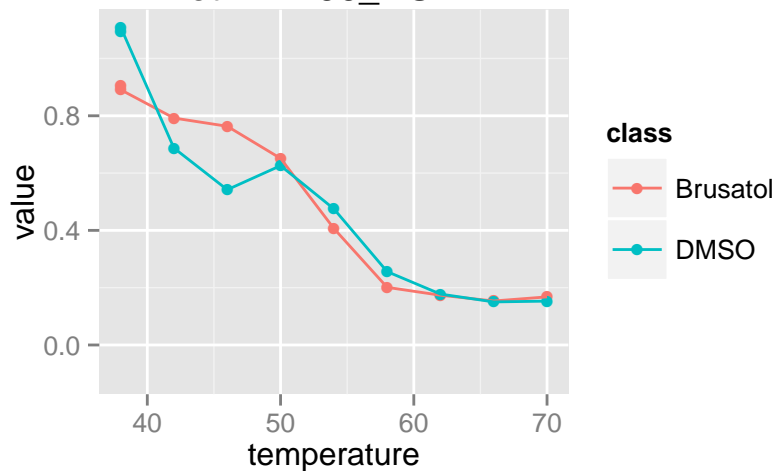

Prot: RBPMS\_HUMAN

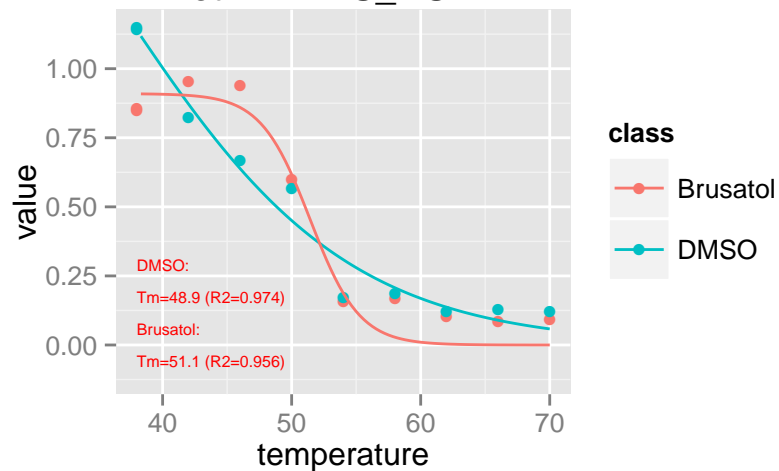

Prot: RBSK\_HUMAN

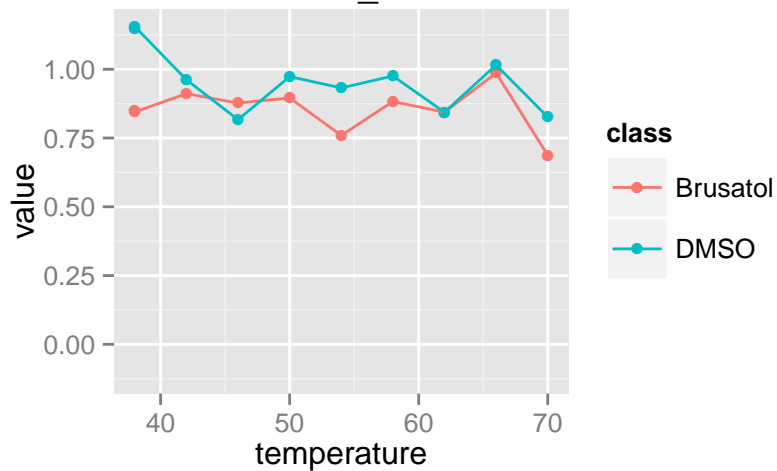

Prot: RBX1\_HUMAN

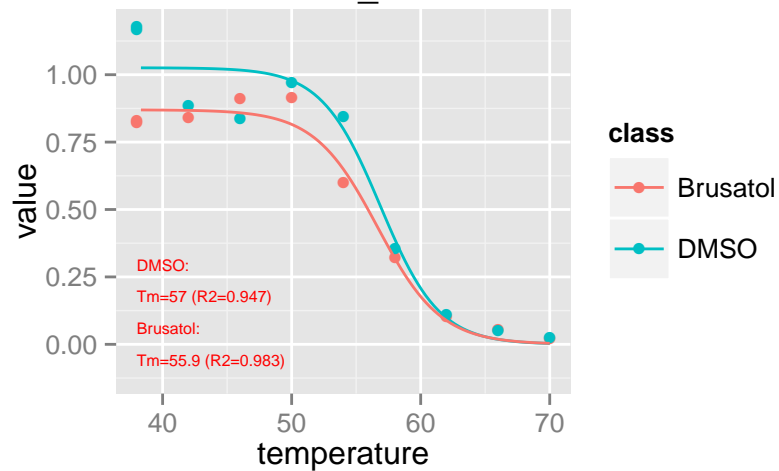

Prot: RCC1\_HUMAN

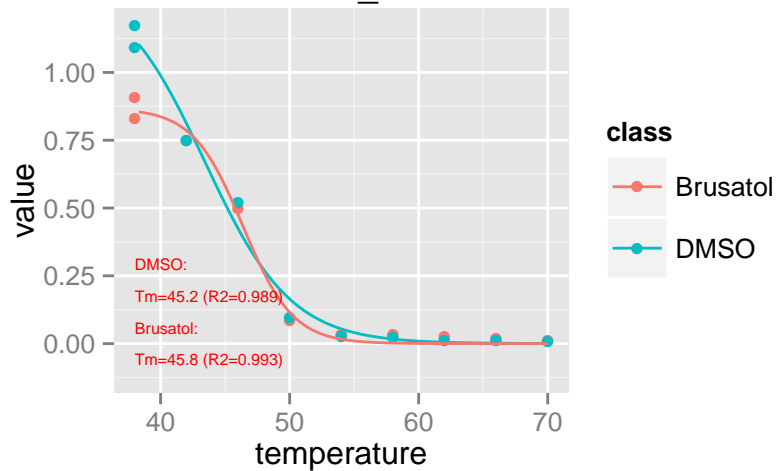

Prot: RCC2\_HUMAN

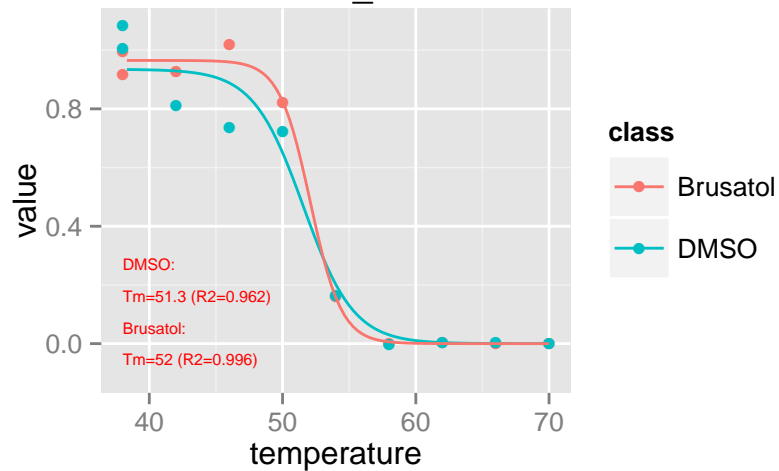

Prot: RCCD1\_HUMAN

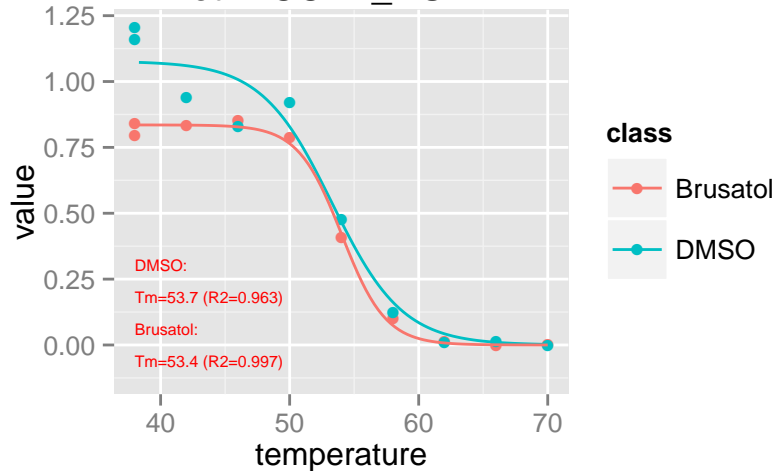

Prot: RCD1\_HUMAN

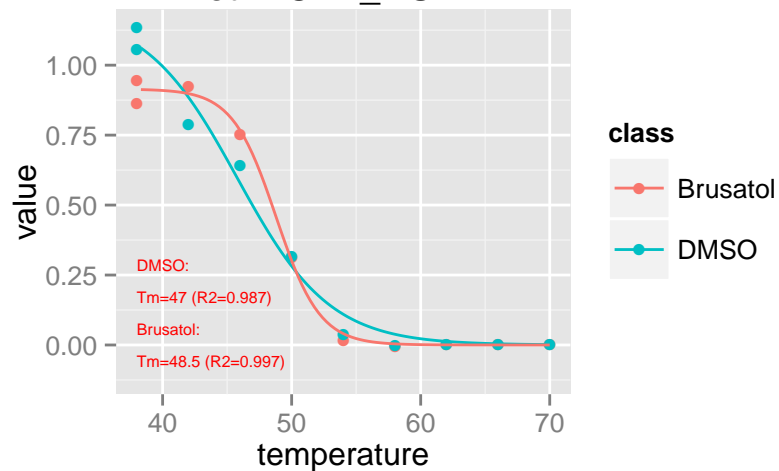

Prot: RCL\_HUMAN

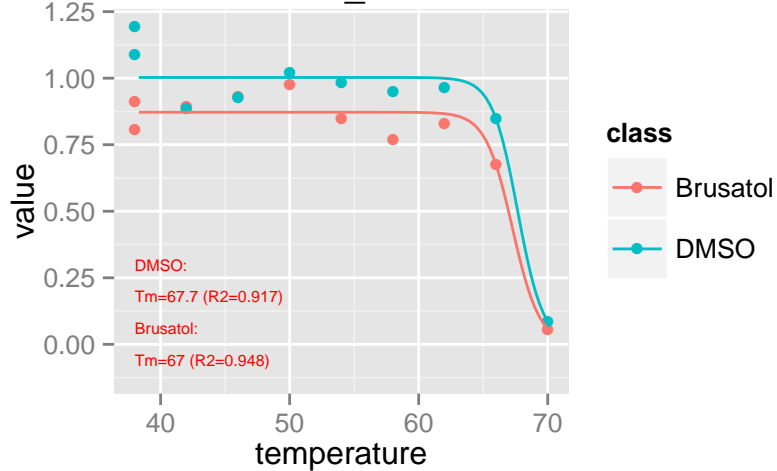

Prot: RCN1\_HUMAN

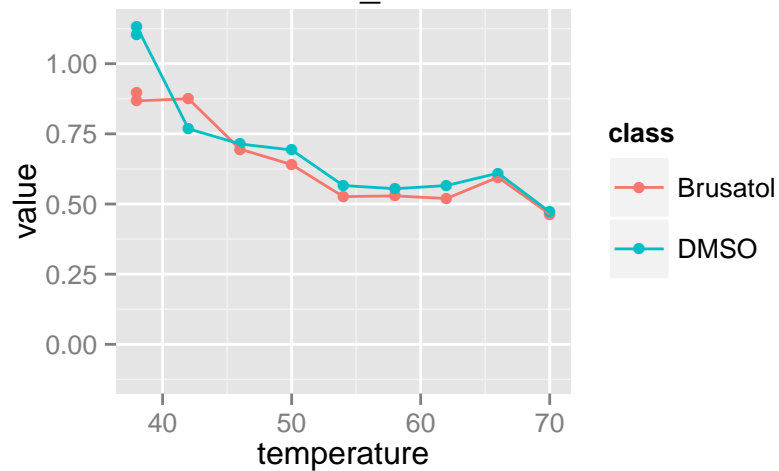

Prot: RCN2\_HUMAN

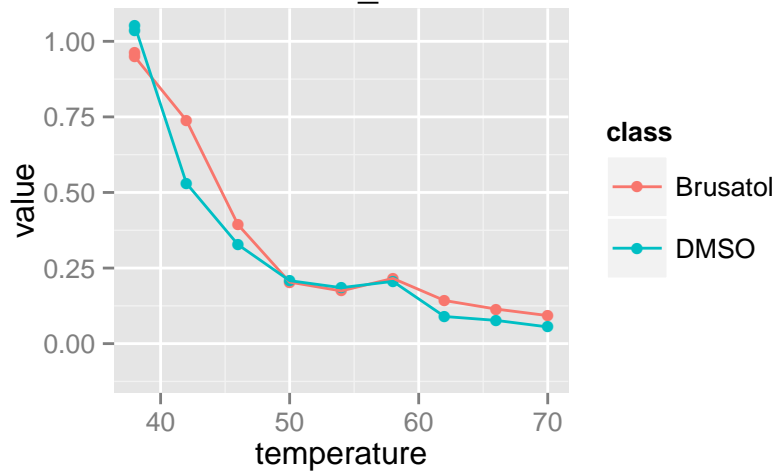

Prot: RCOR1\_HUMAN

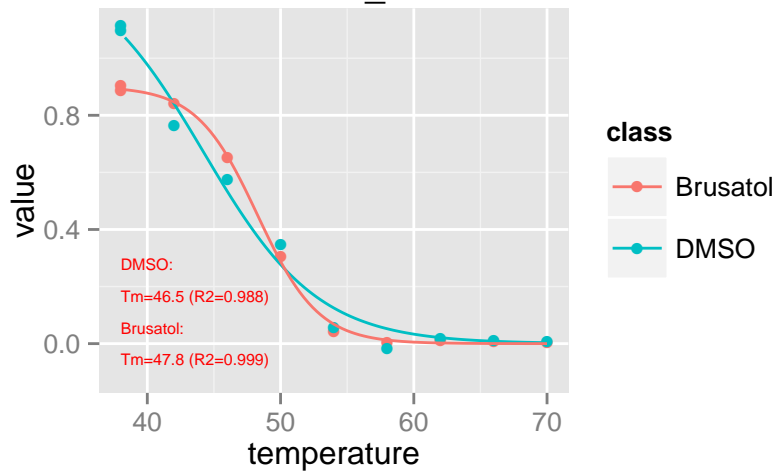

Prot: RD23A\_HUMAN

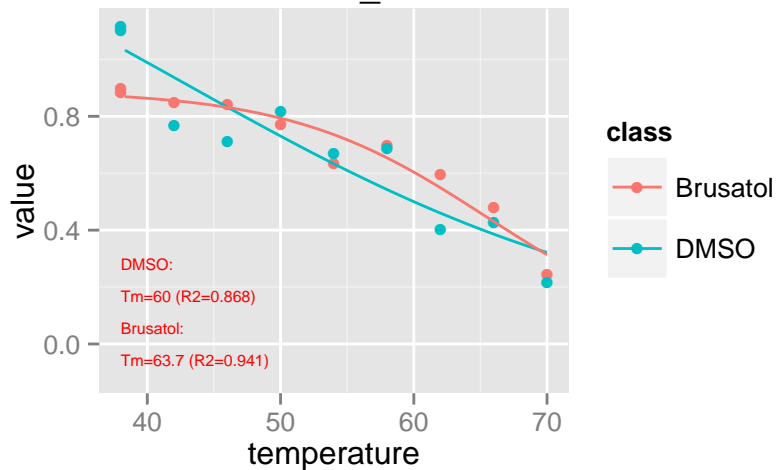

Prot: RD23B\_HUMAN

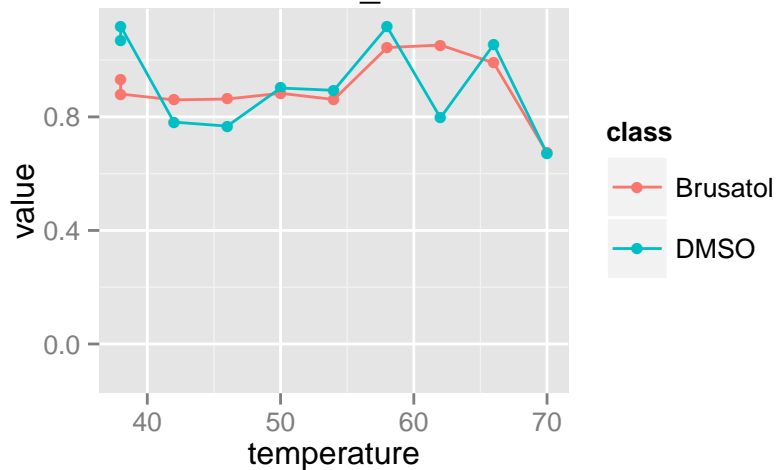

Prot: RECQ1\_HUMAN

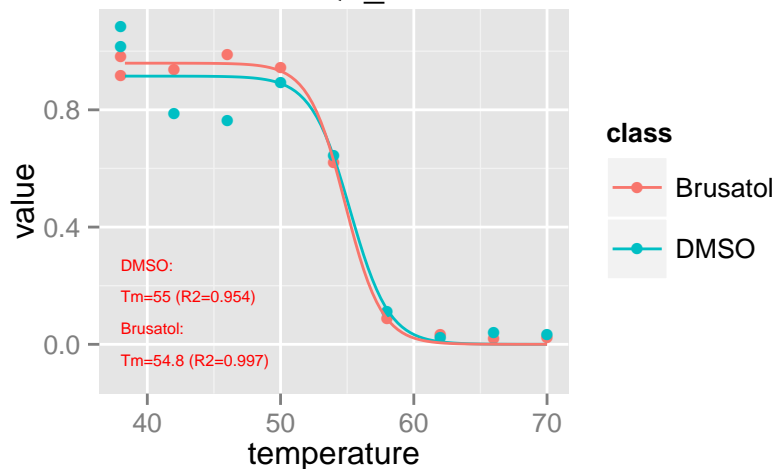

Prot: RED\_HUMAN

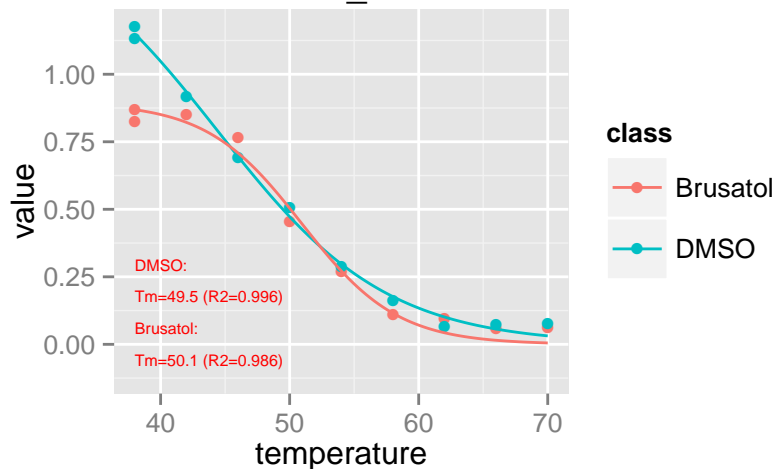

Prot: RENT1\_HUMAN

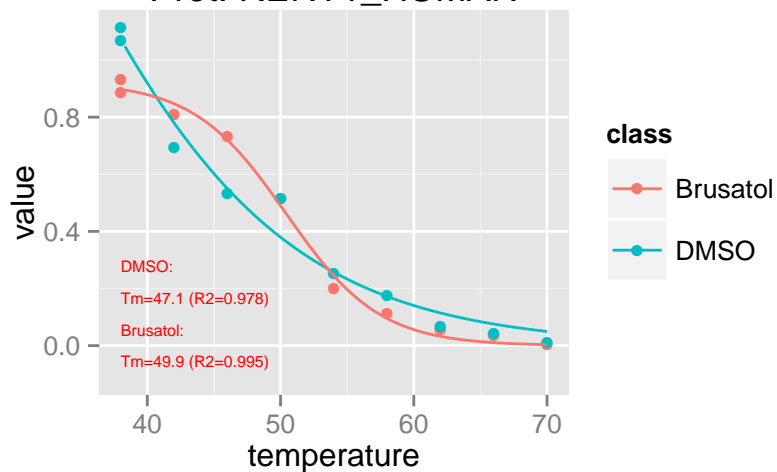

Prot: REPS1\_HUMAN

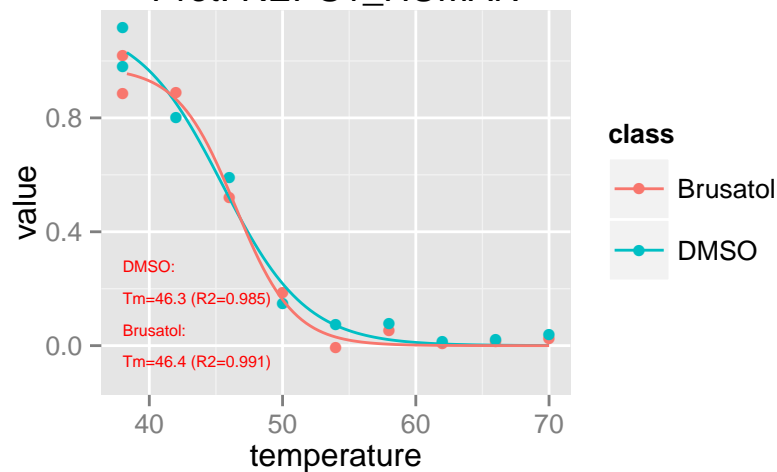

Prot: REQU\_HUMAN

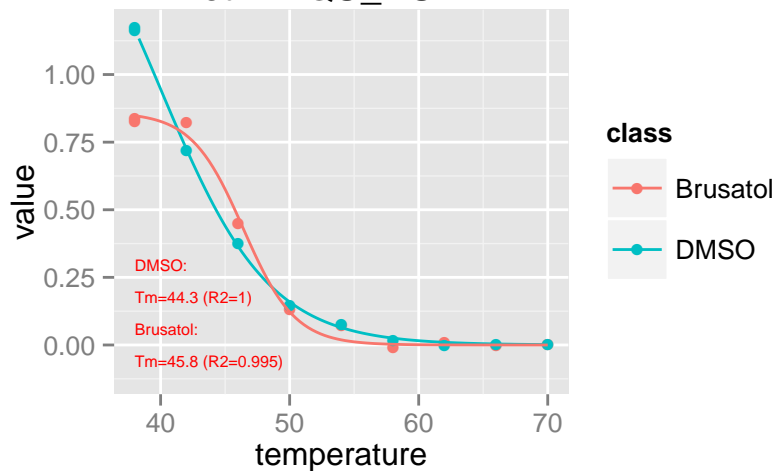

Prot: RFA1\_HUMAN

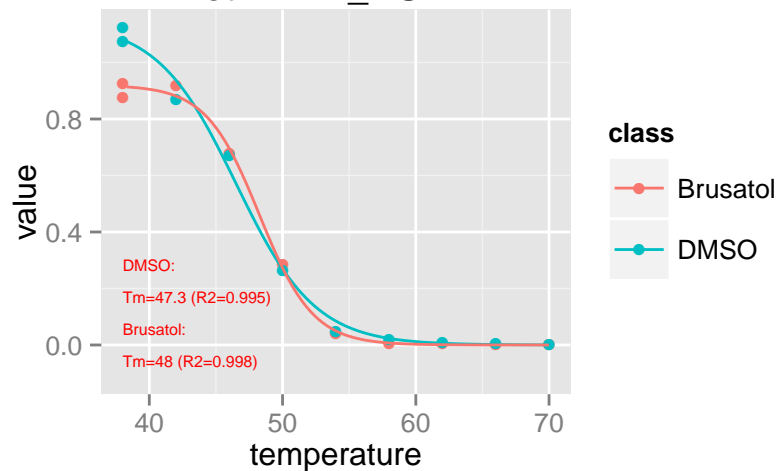

Prot: RFA2\_HUMAN

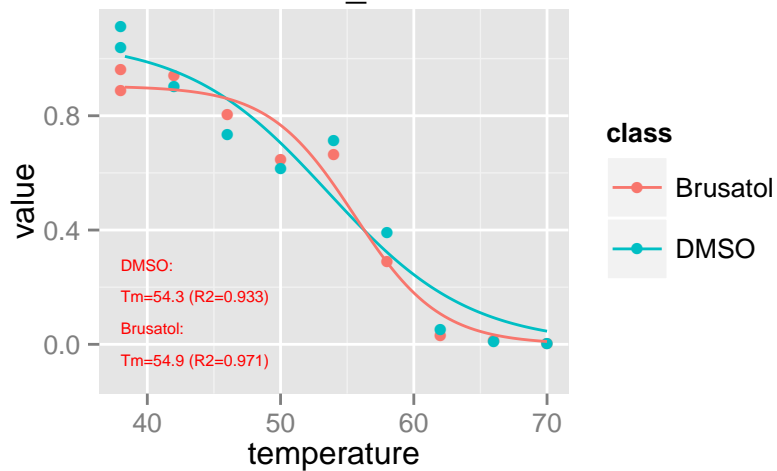

Prot: RFA3\_HUMAN

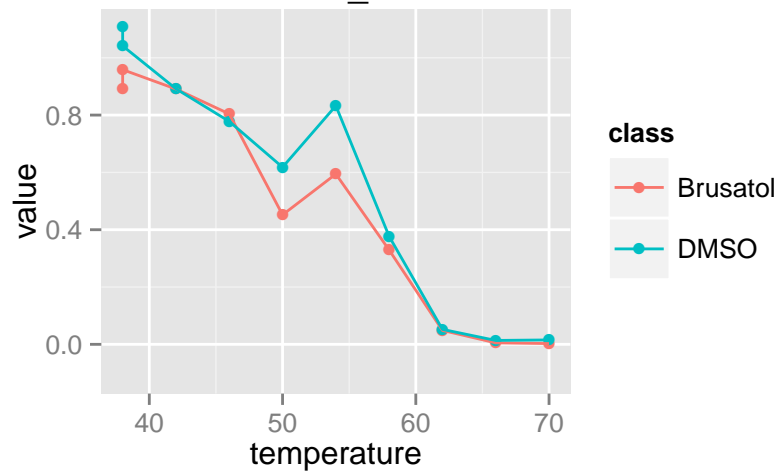

Prot: RFC2\_HUMAN

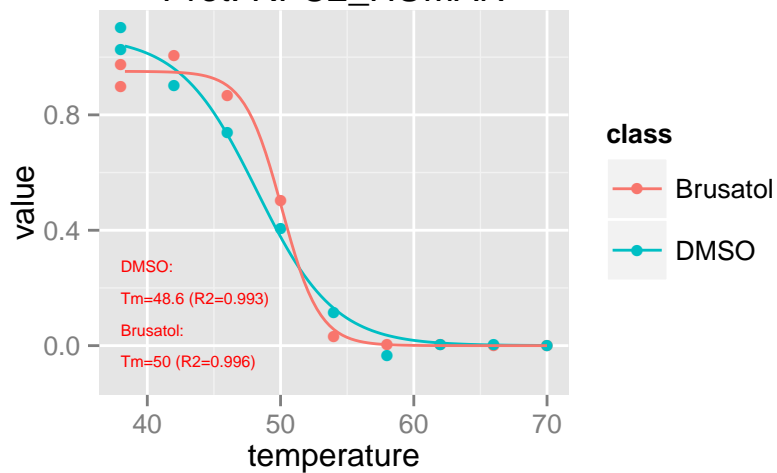

Prot: RFC3\_HUMAN

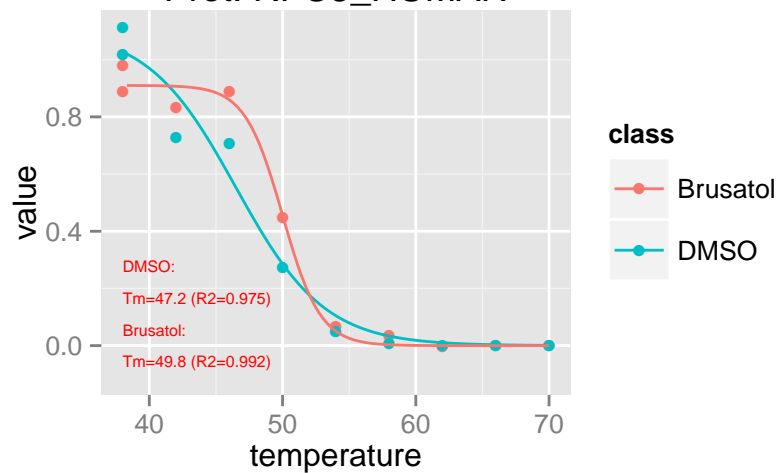

Prot: RFC4\_HUMAN

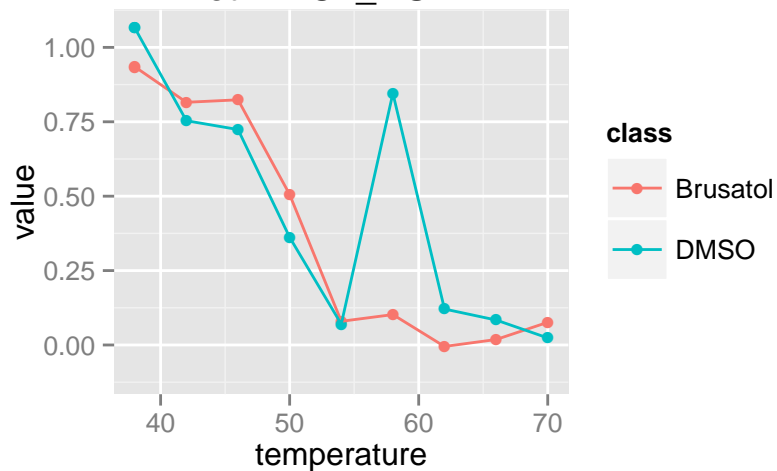

Prot: RFC5\_HUMAN

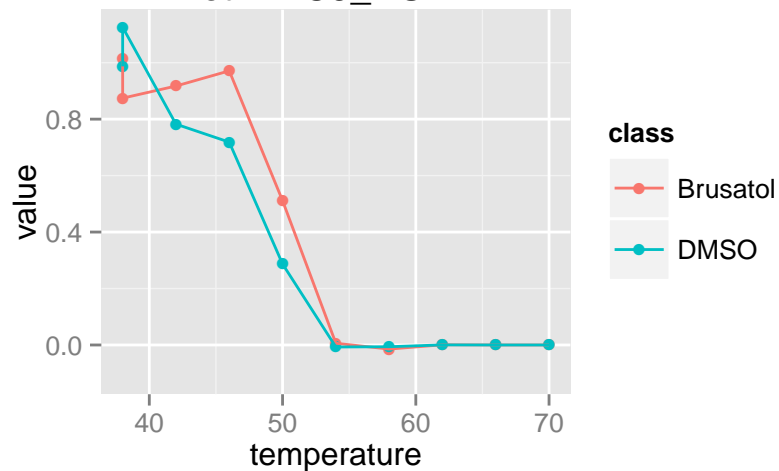

Prot: RFIP1\_HUMAN

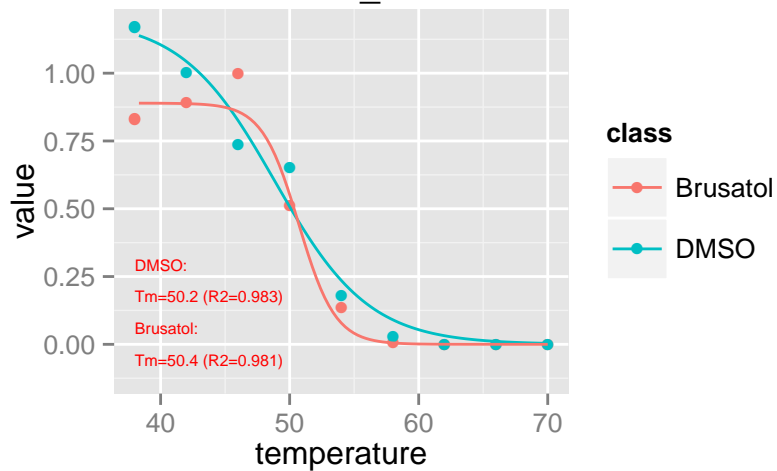

Prot: RGAP1\_HUMAN

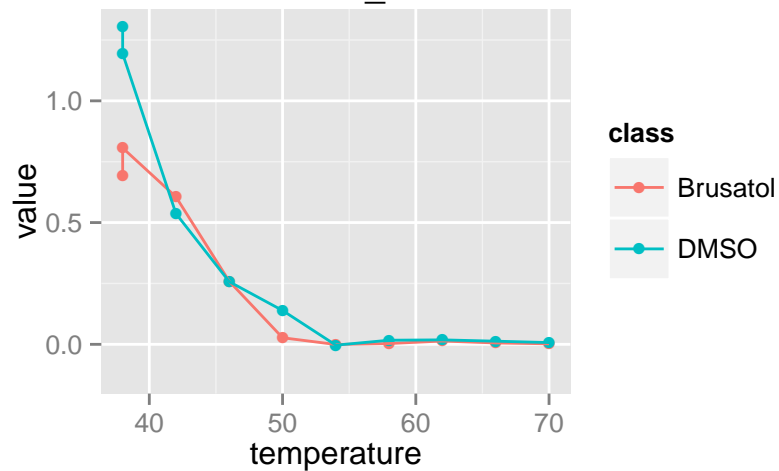



Prot: RGS10\_HUMAN

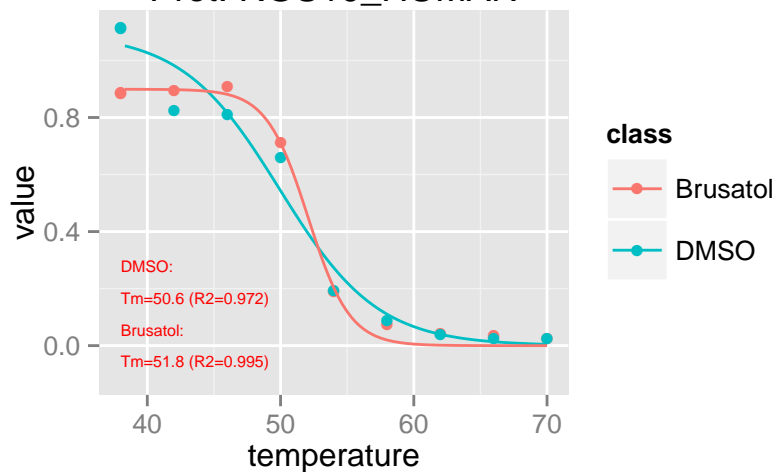

Prot: RHEB\_HUMAN

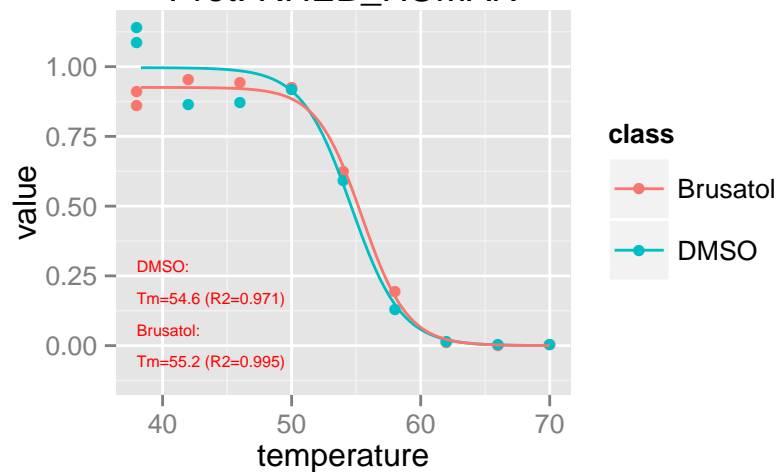

Prot: RHG01\_HUMAN

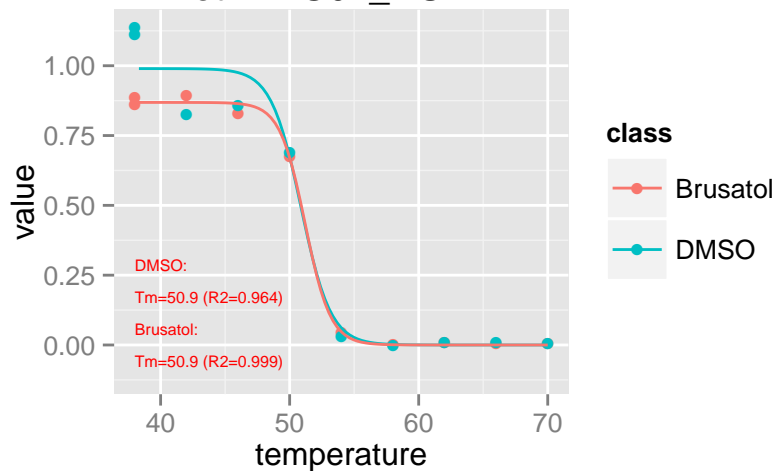

Prot: RHG12\_HUMAN

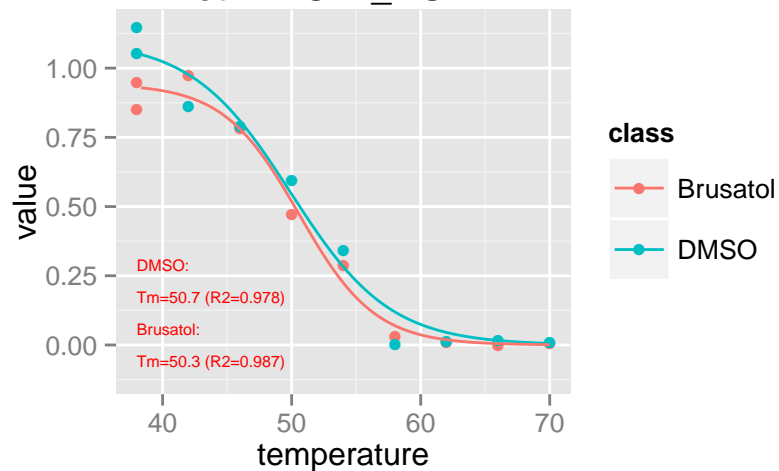

Prot: RHG17\_HUMAN

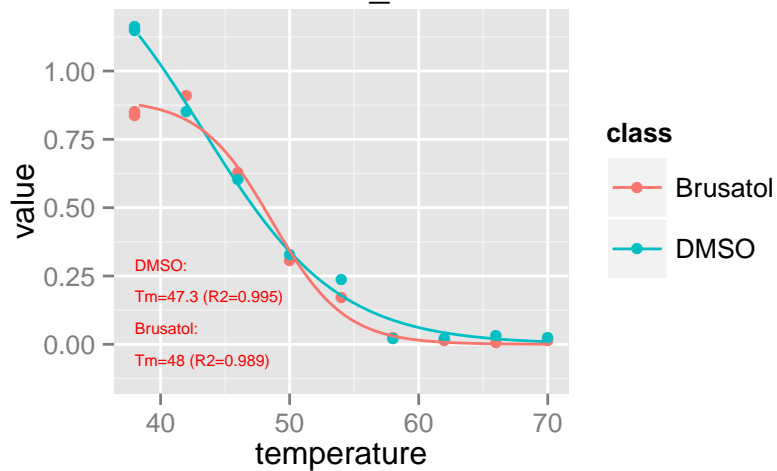

Prot: RHG18\_HUMAN

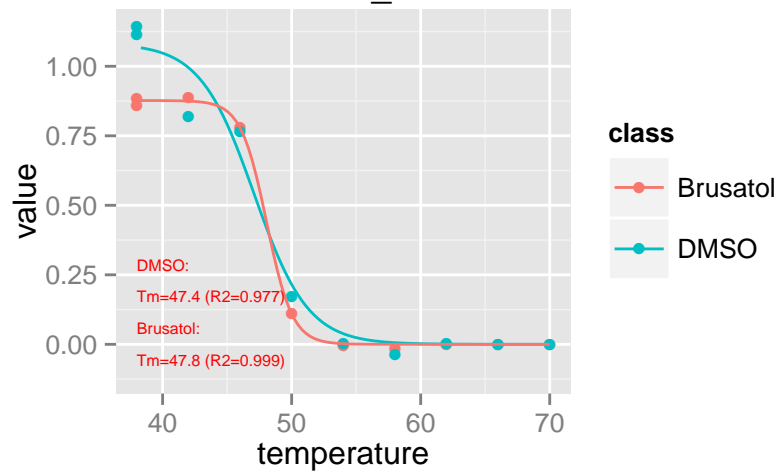

Prot: RHG35\_HUMAN

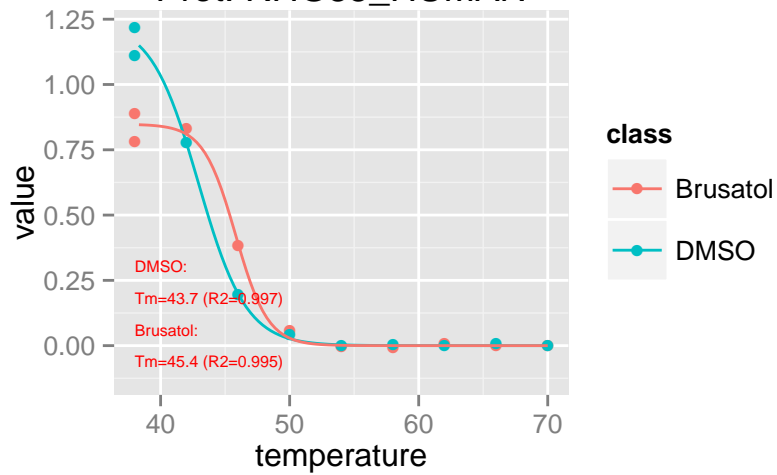

Prot: RHN2L\_HUMAN

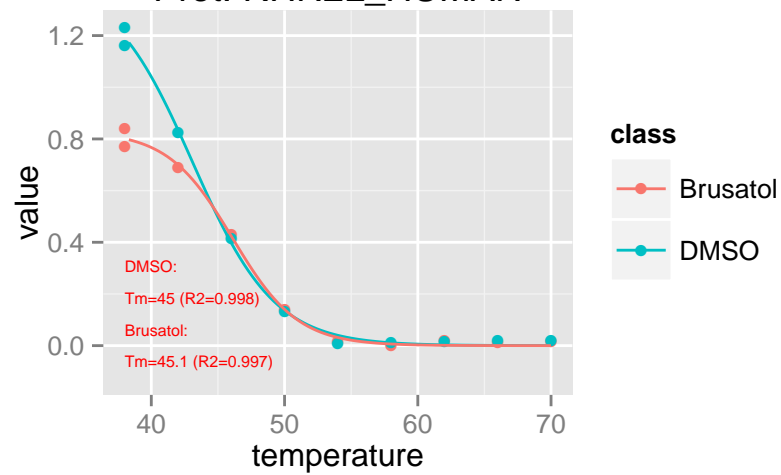

Prot: RHOA\_HUMAN

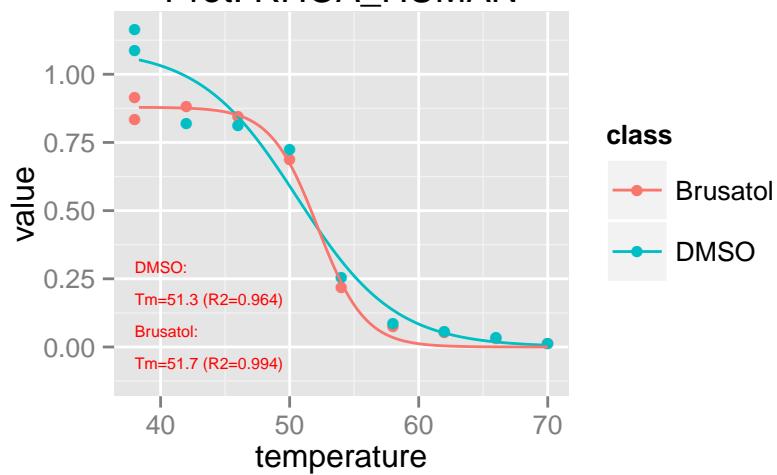

Prot: RHOC\_HUMAN

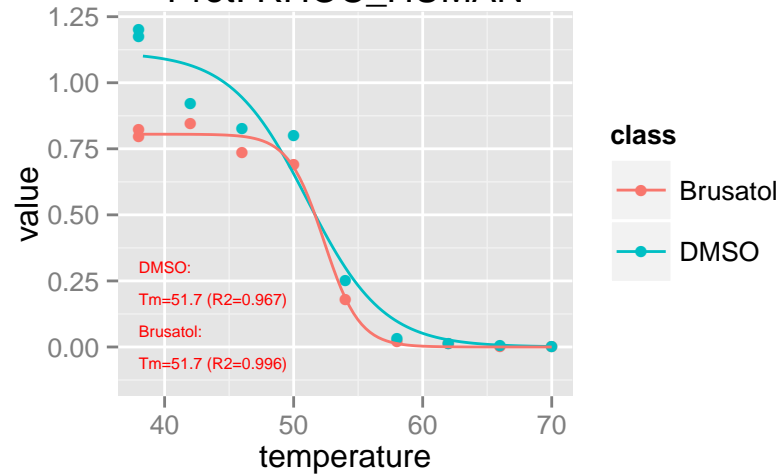

Prot: RHPN2\_HUMAN

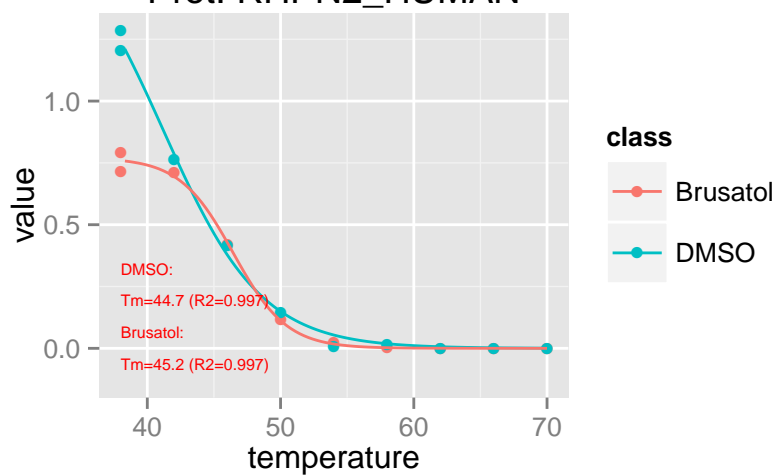

Prot: RIC8A\_HUMAN

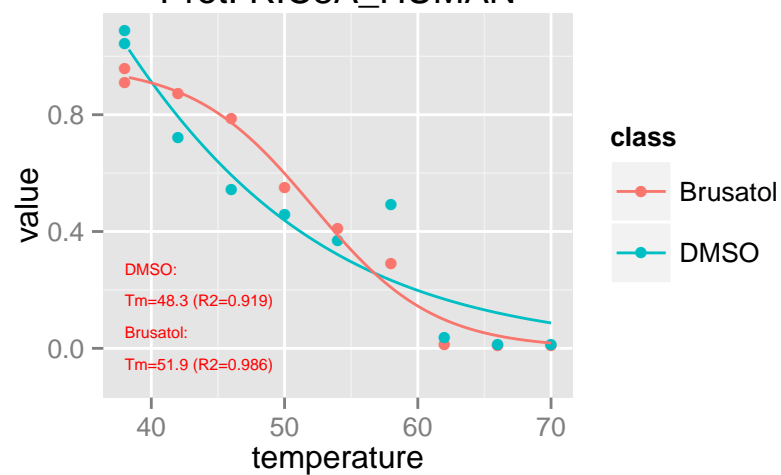

Prot: RICTR\_HUMAN

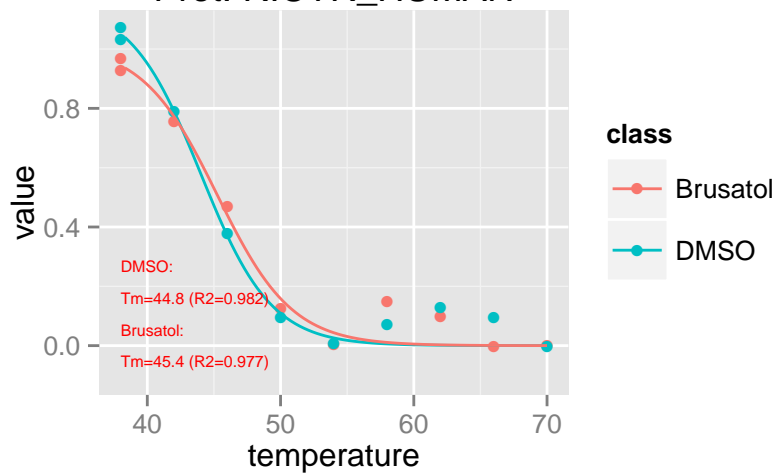

Prot: RIF1\_HUMAN

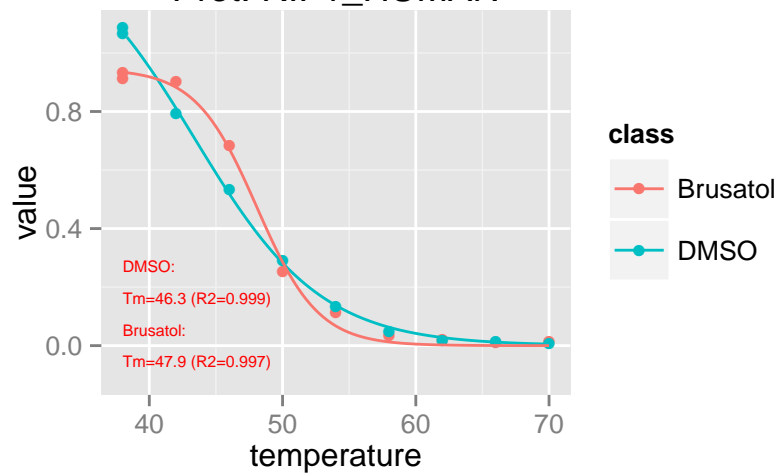

Prot: RIFK\_HUMAN

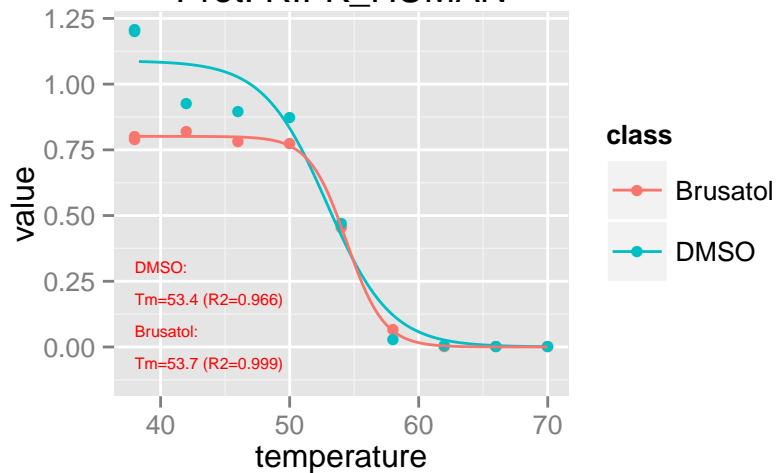

Prot: RIN1\_HUMAN

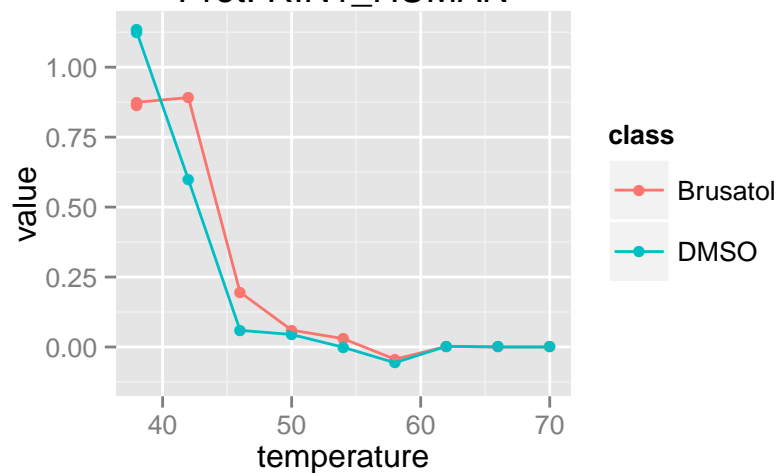

Prot: RING1\_HUMAN

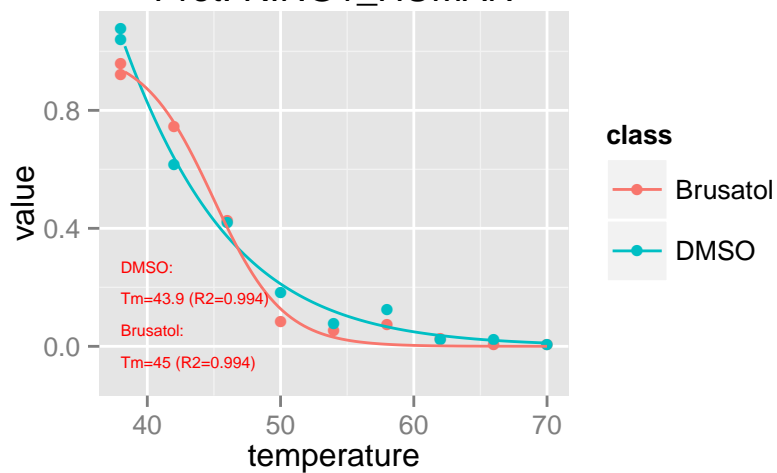

Prot: RINI\_HUMAN

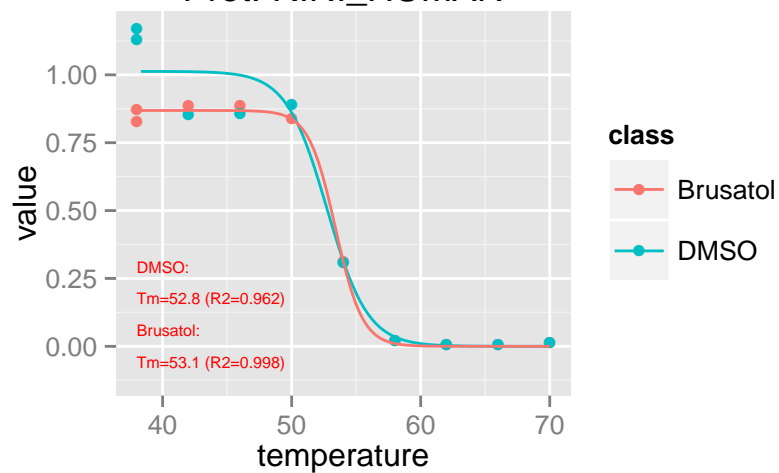

Prot: RIOK1\_HUMAN

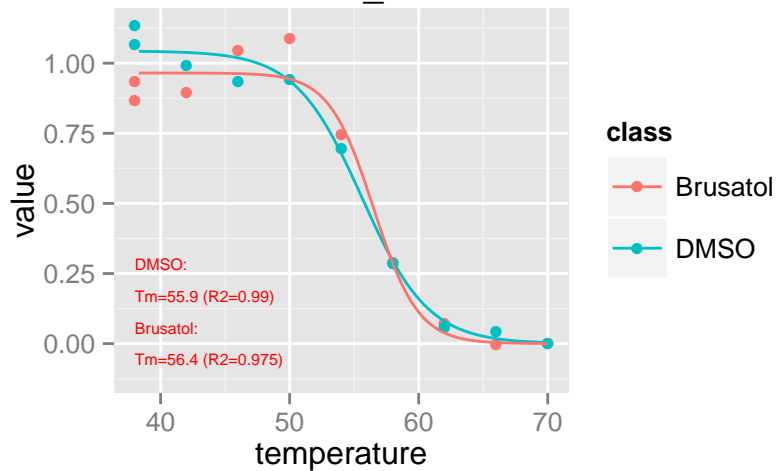

Prot: RIOK2\_HUMAN

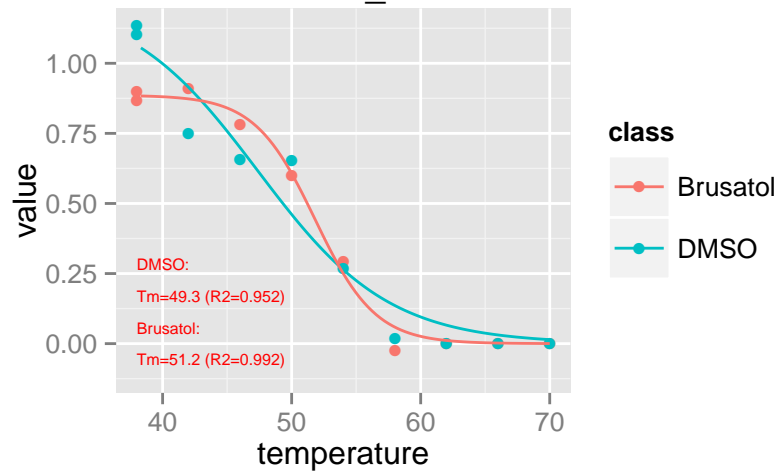

Prot: RIPK1\_HUMAN

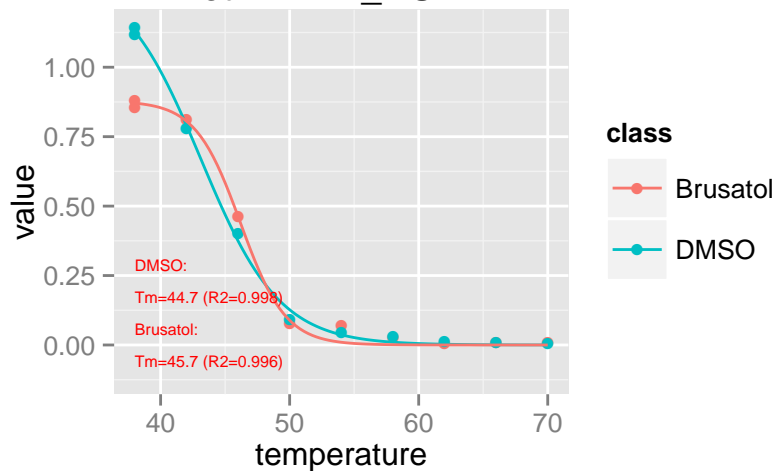

Prot: RIPK2\_HUMAN

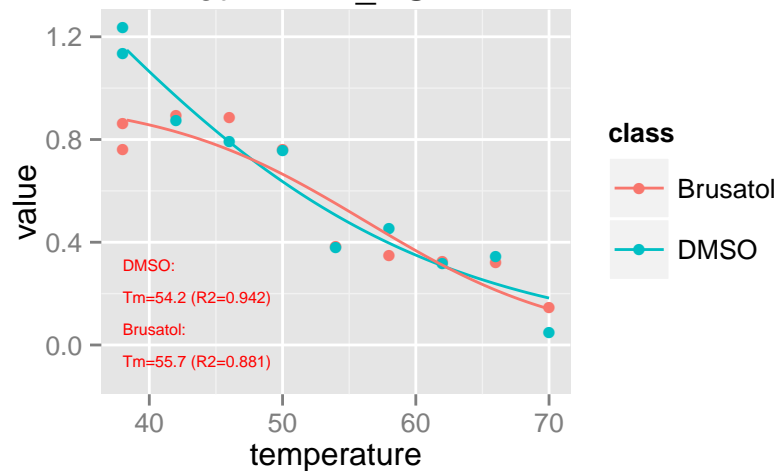

Prot: RIR1\_HUMAN

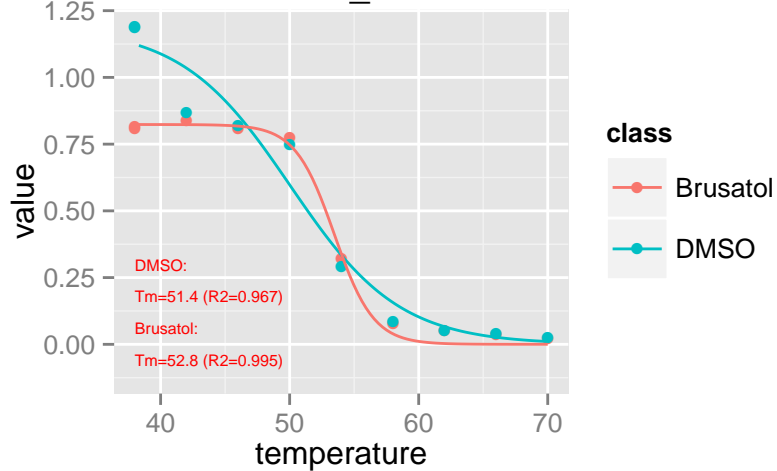

Prot: RIR2\_HUMAN

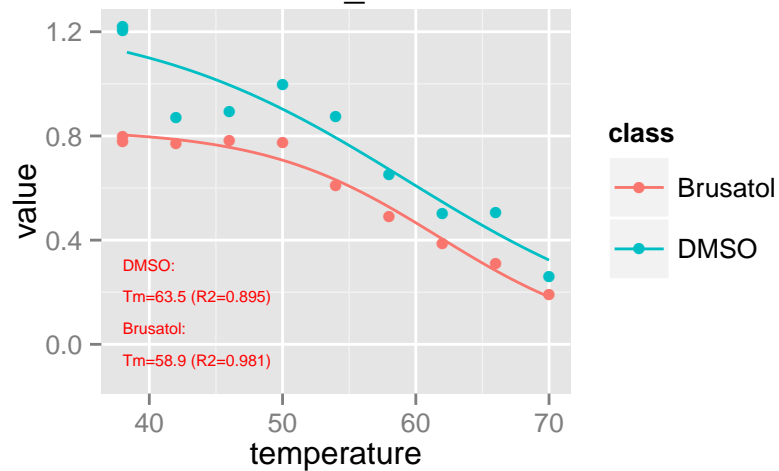

Prot: RIR2B\_HUMAN

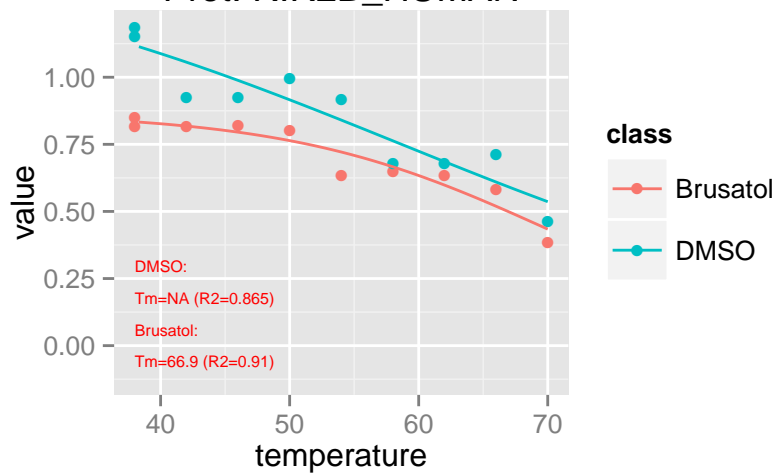

Prot: RISC\_HUMAN

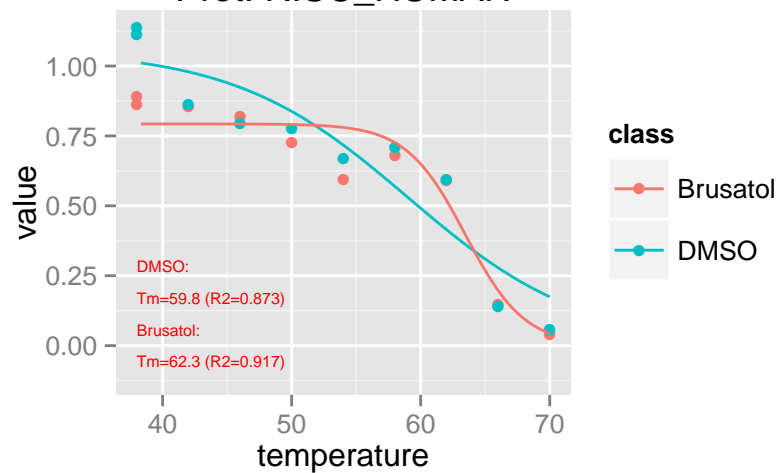

Prot: RL10\_HUMAN

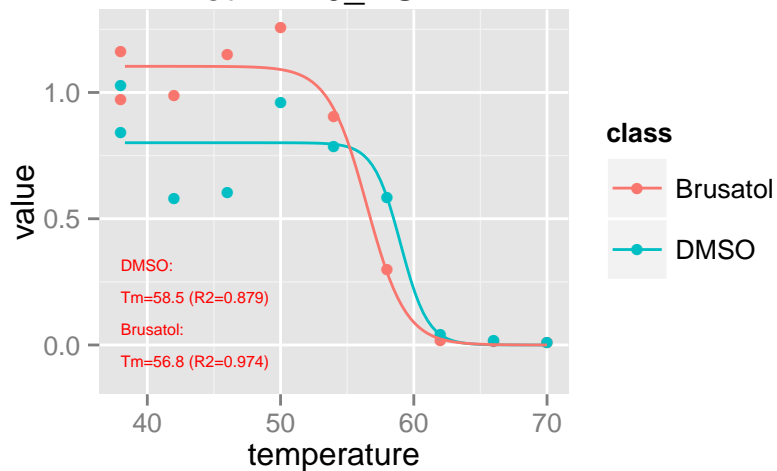

Prot: RL10A\_HUMAN

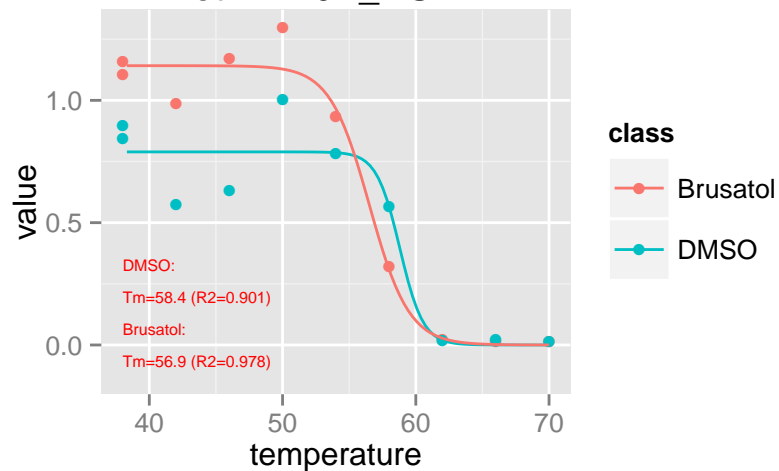

Prot: RL10L\_HUMAN

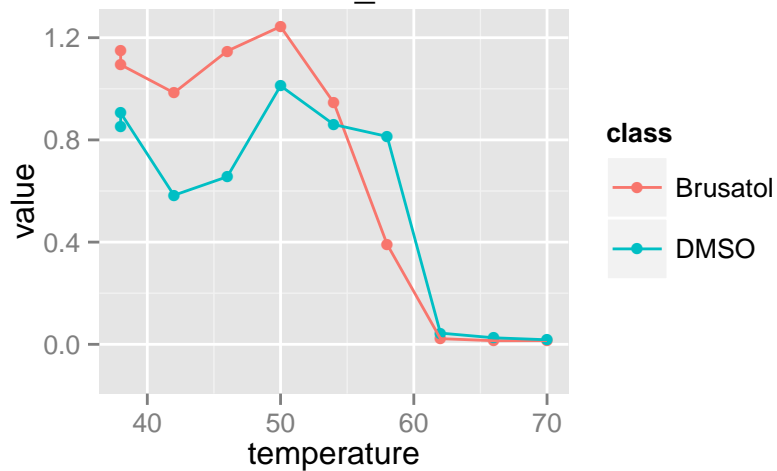

Prot: RL11\_HUMAN

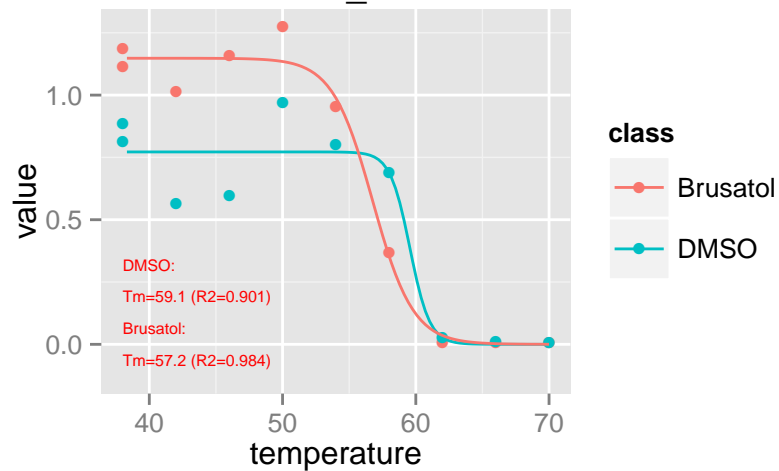

Prot: RL12\_HUMAN

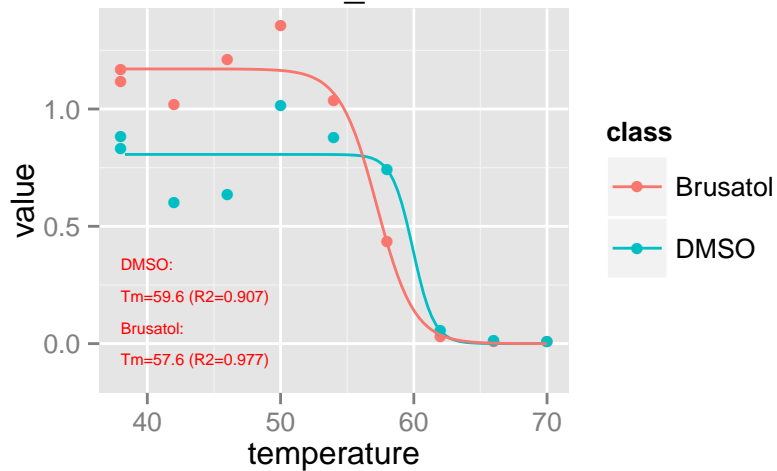

Prot: RL13\_HUMAN

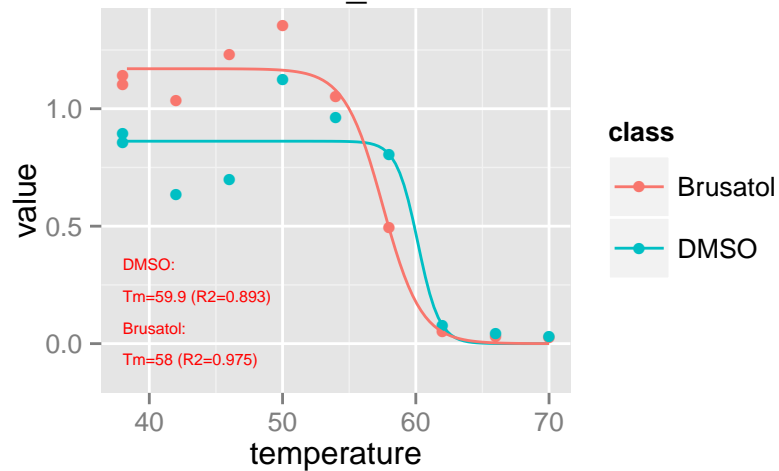

Prot: RL13A\_HUMAN

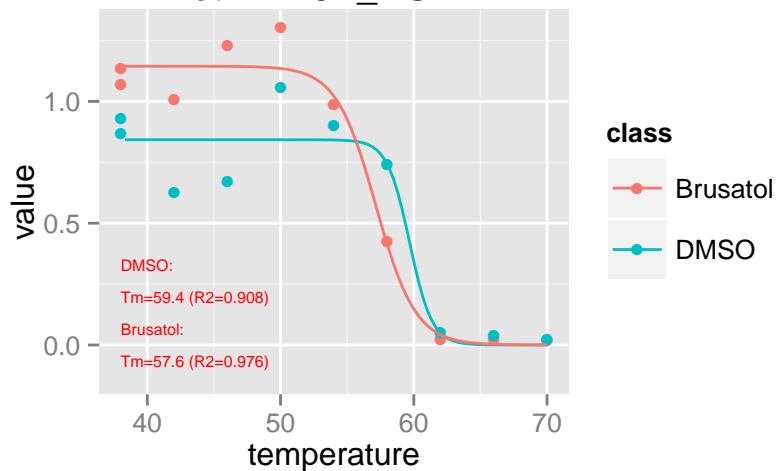

Prot: RL14\_HUMAN

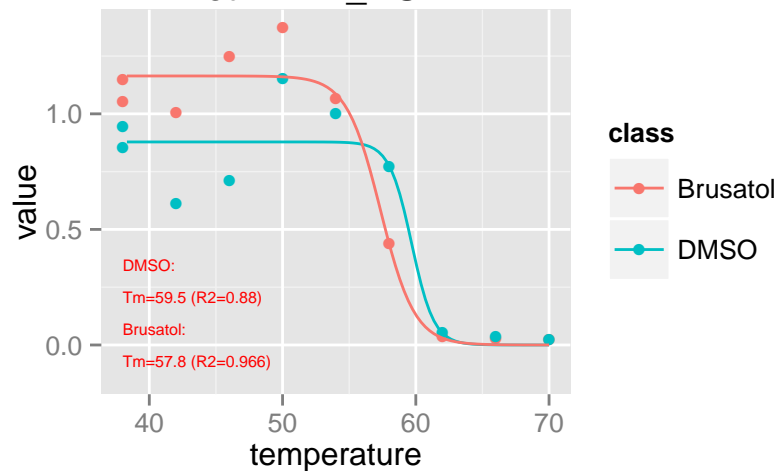

Prot: RL15\_HUMAN

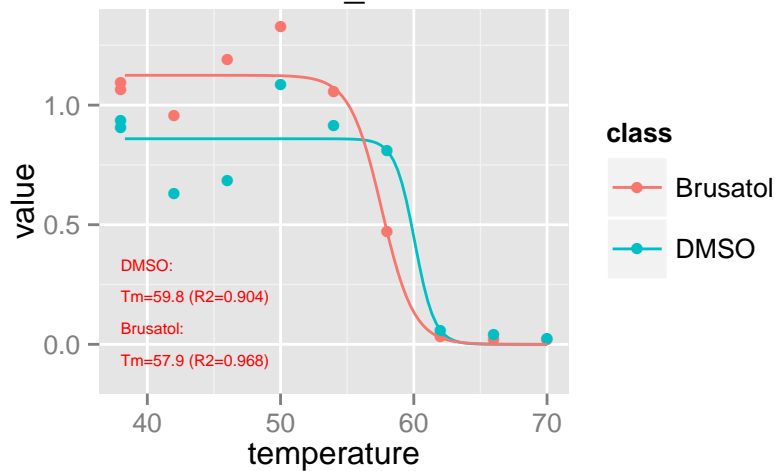

Prot: RL17\_HUMAN

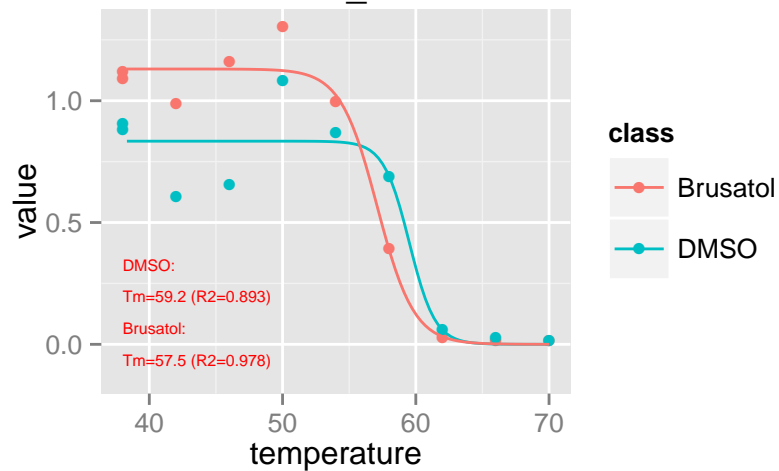

Prot: RL18\_HUMAN

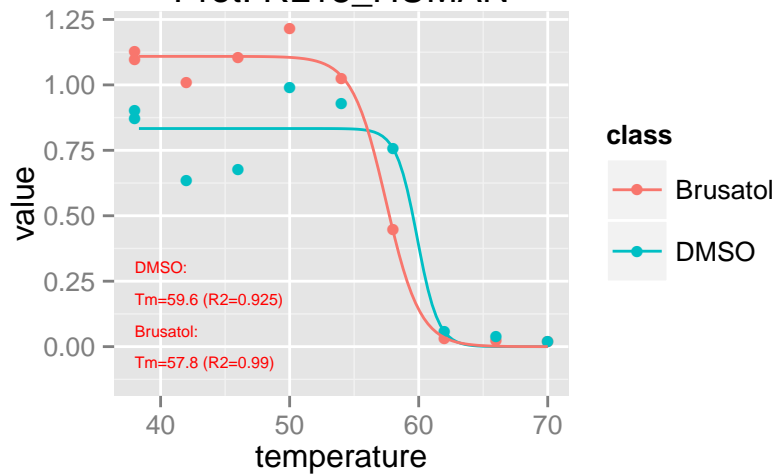

Prot: RL18A\_HUMAN

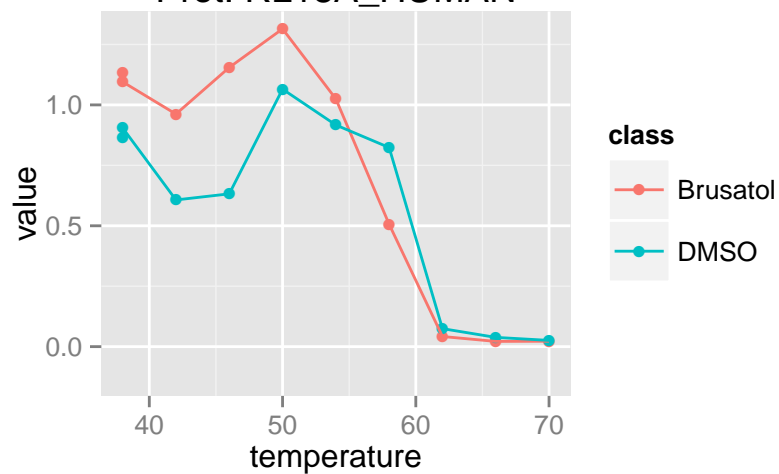

Prot: RL19\_HUMAN

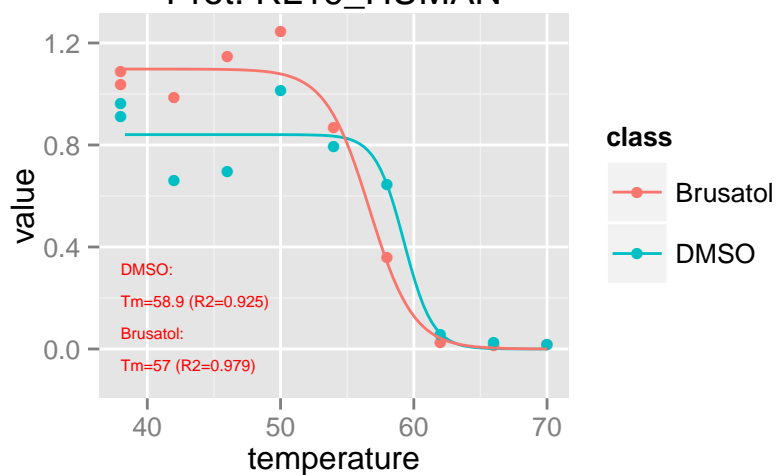

Prot: RL1D1\_HUMAN

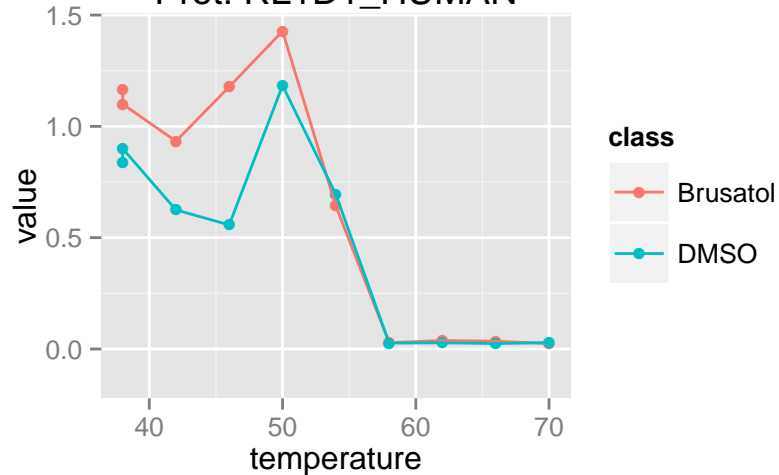

Prot: RL21\_HUMAN

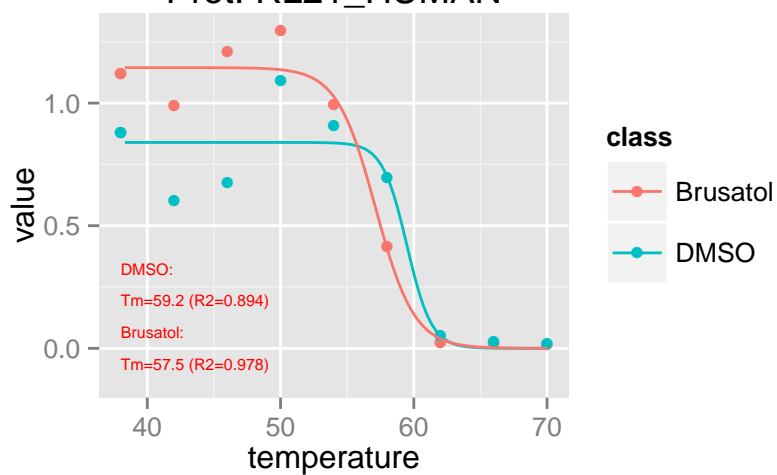

Prot: RL22\_HUMAN

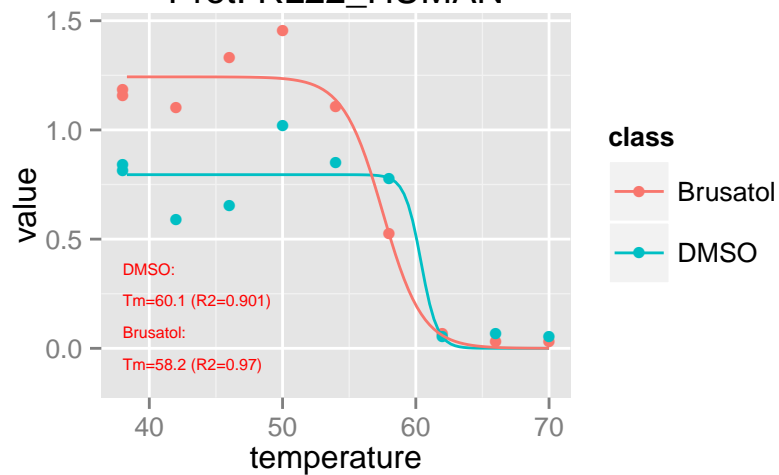

Prot: RL22L\_HUMAN

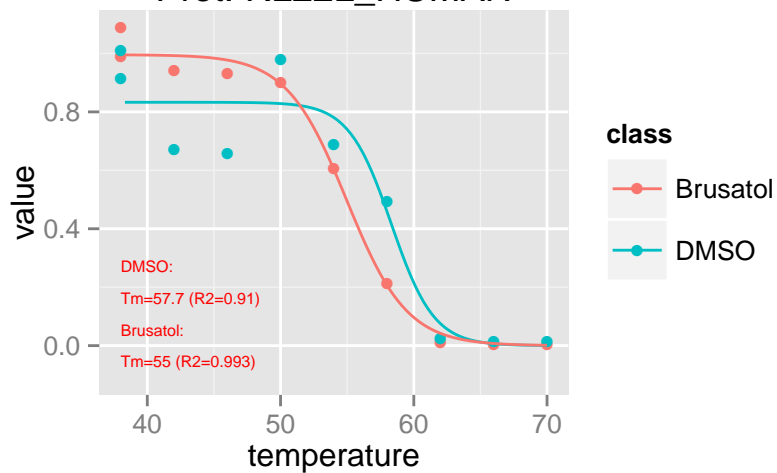

Prot: RL23\_HUMAN

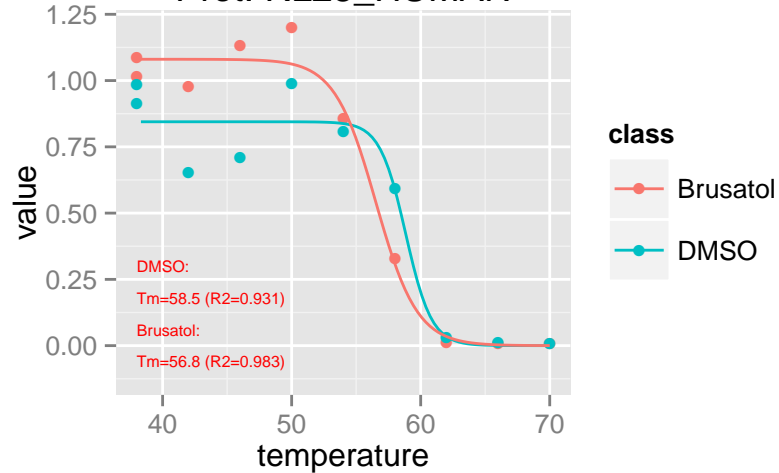

Prot: RL23A\_HUMAN

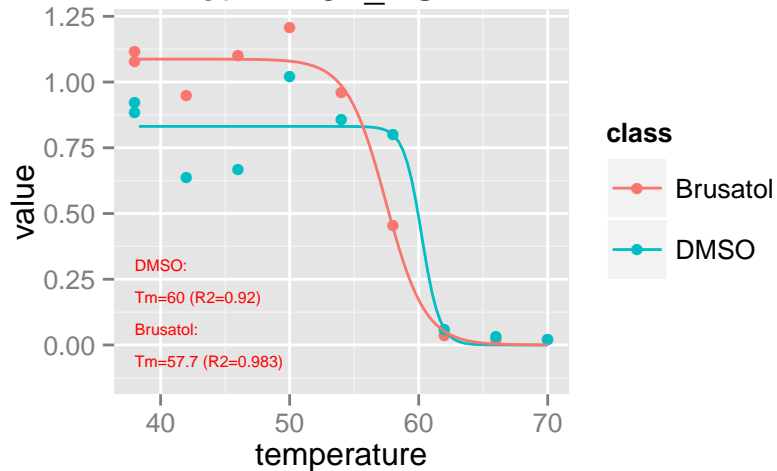

Prot: RL24\_HUMAN

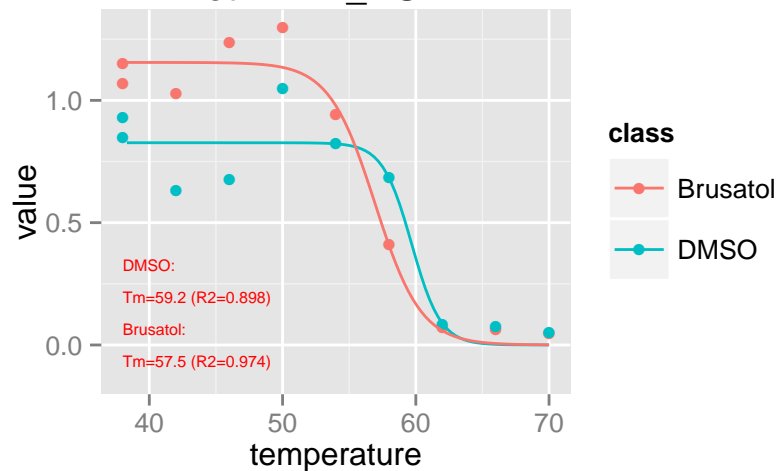

Prot: RL26\_HUMAN

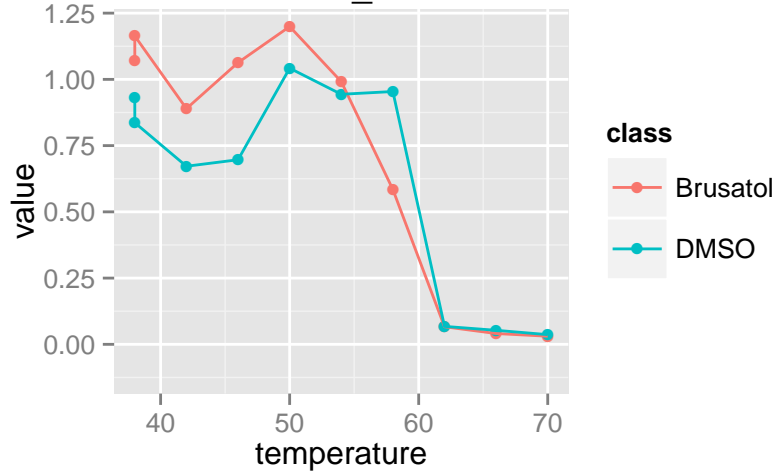

Prot: RL26L\_HUMAN

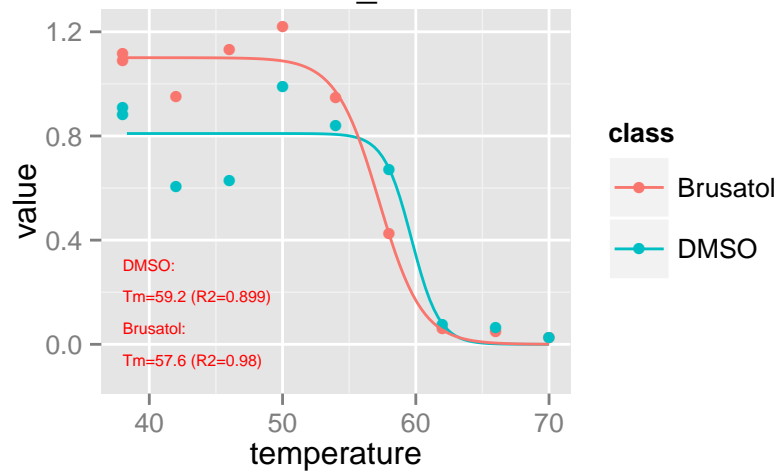



Prot: RL27\_HUMAN

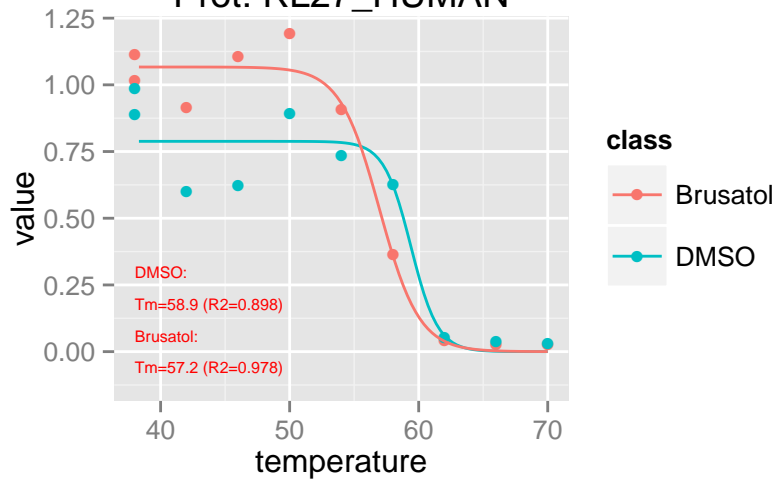

Prot: RL27A\_HUMAN

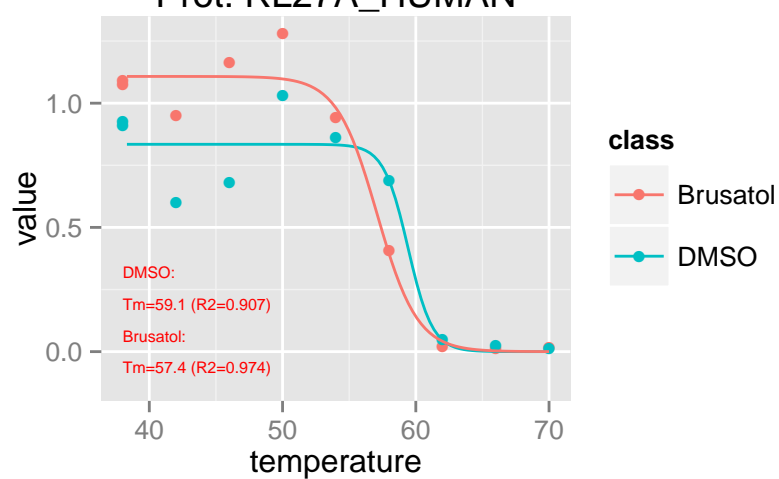

Prot: RL28\_HUMAN

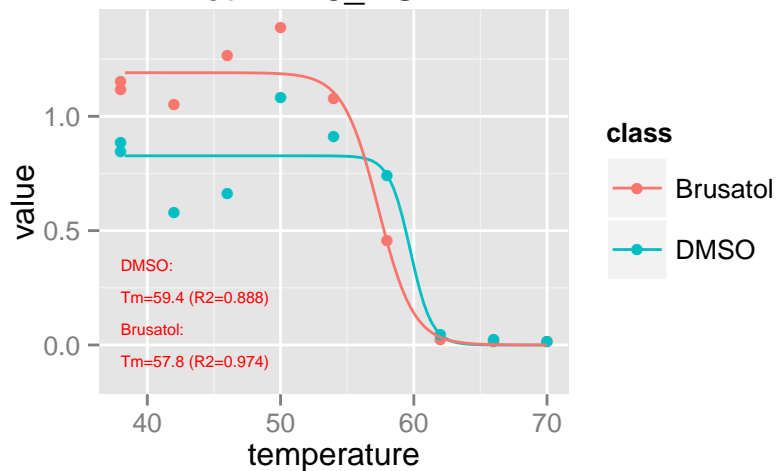

Prot: RL29\_HUMAN

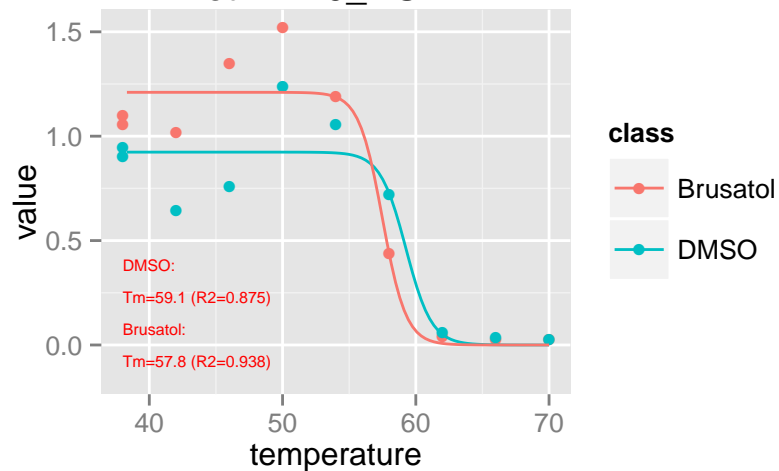

Prot: RL3\_HUMAN

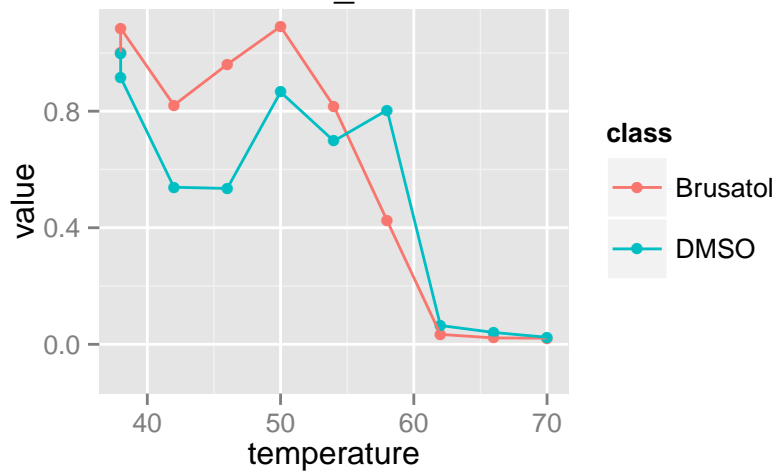

Prot: RL30\_HUMAN

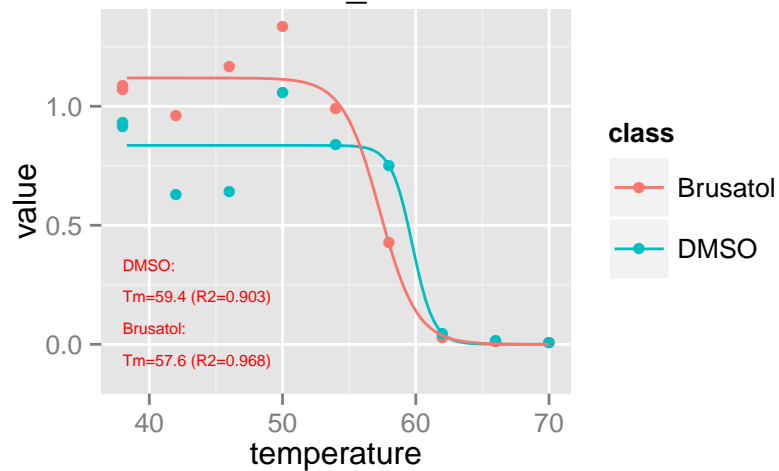

Prot: RL31\_HUMAN

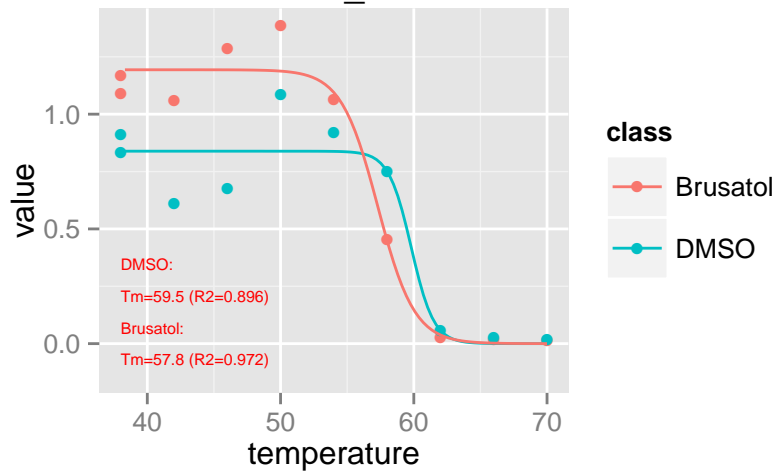

Prot: RL32\_HUMAN

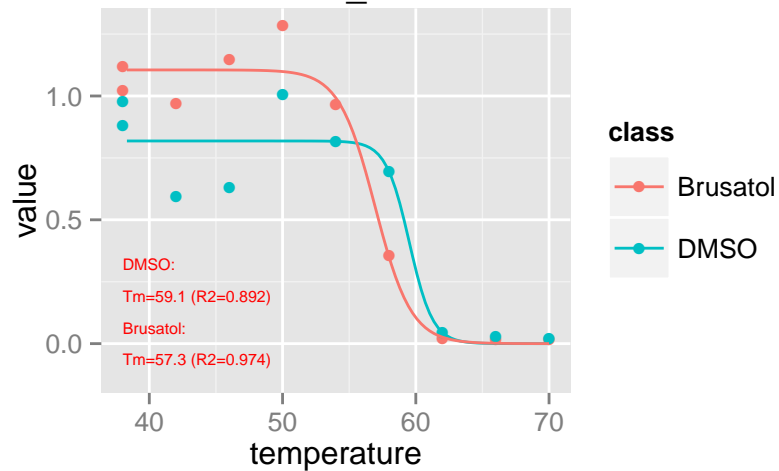

Prot: RL34\_HUMAN

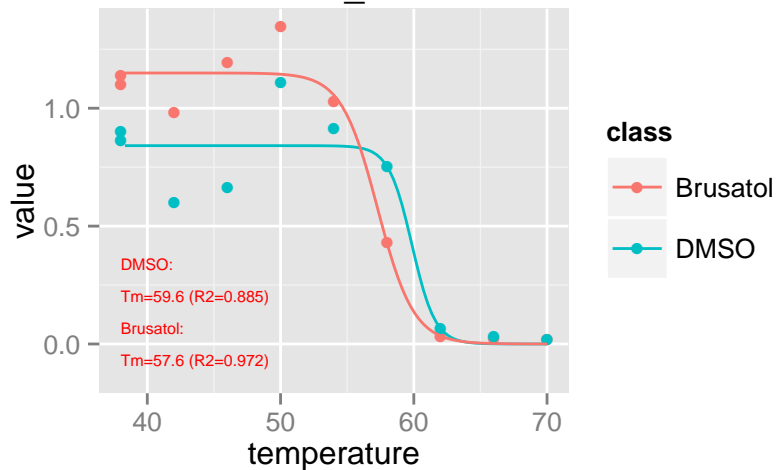

Prot: RL35\_HUMAN

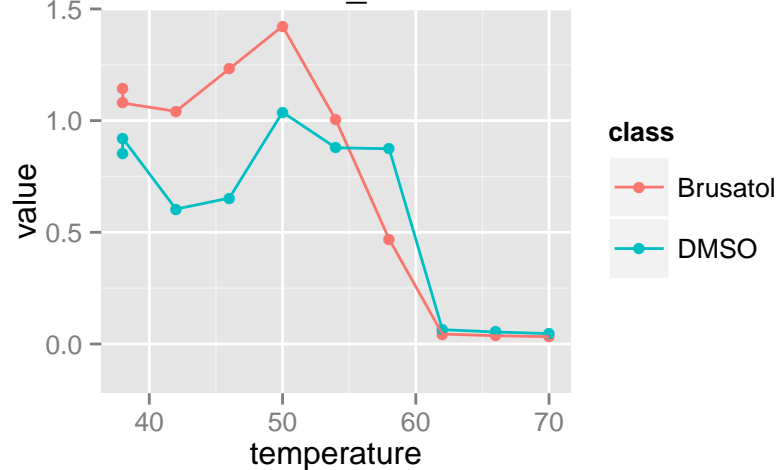

Prot: RL35A\_HUMAN

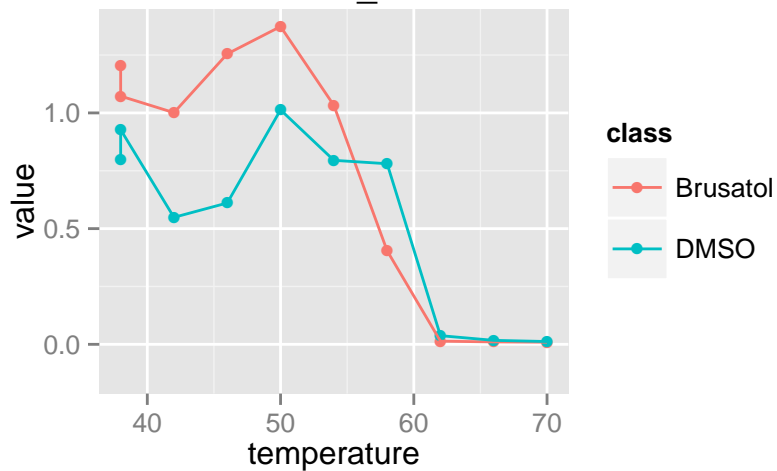

Prot: RL36\_HUMAN

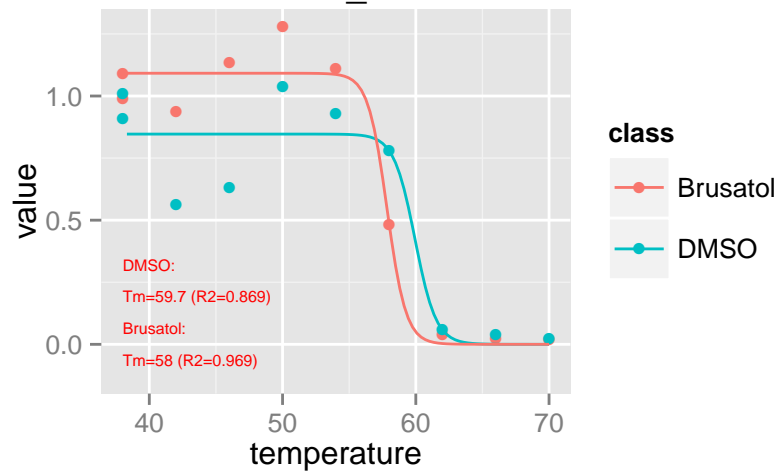

Prot: RL36A\_HUMAN

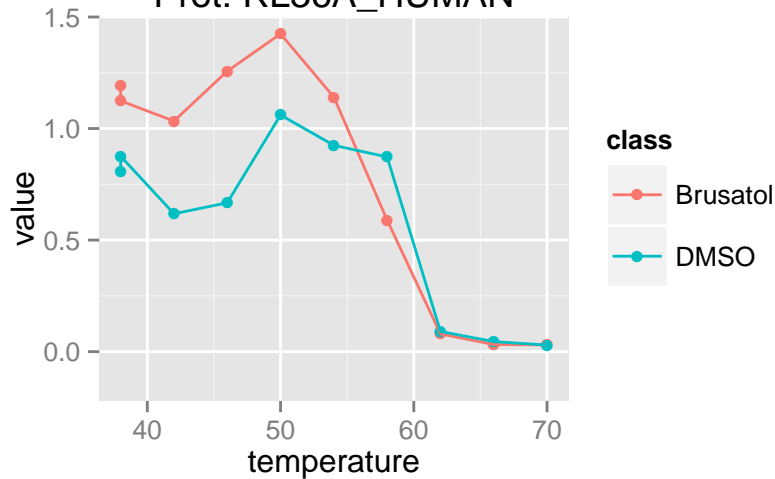

Prot: RL37\_HUMAN

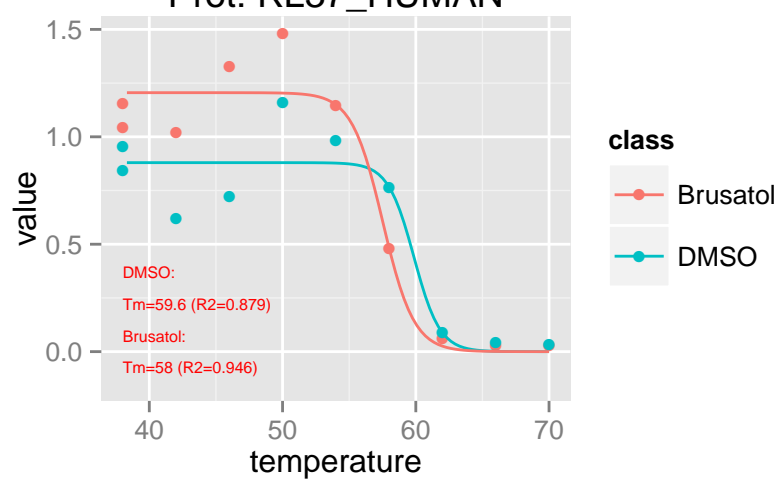

Prot: RL37A\_HUMAN

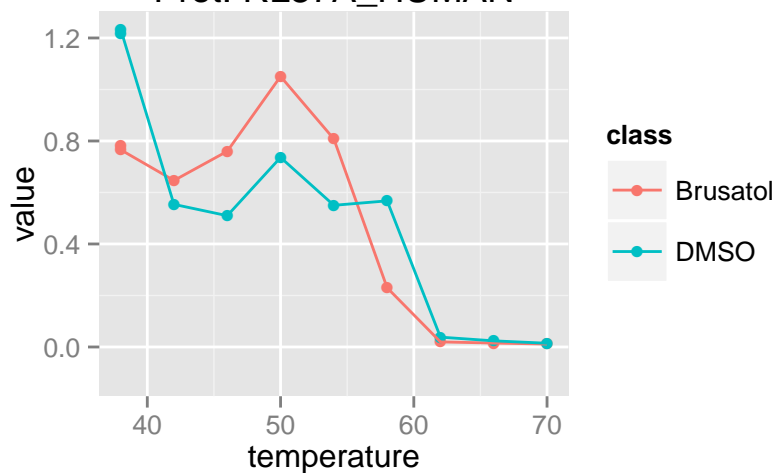

Prot: RL38\_HUMAN

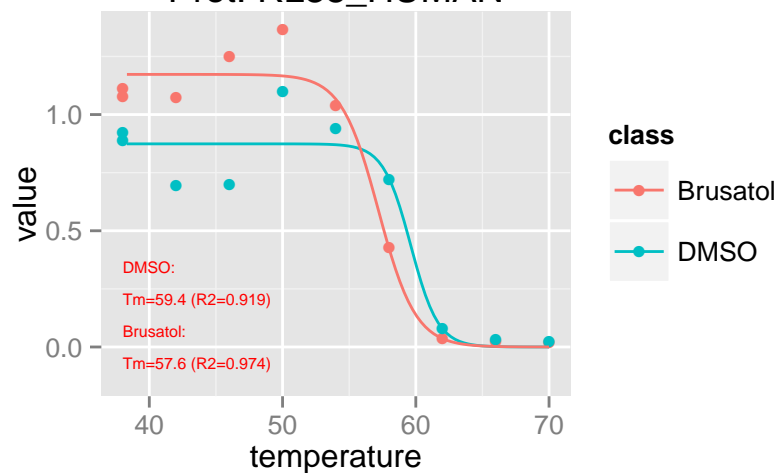

Prot: RL3L\_HUMAN

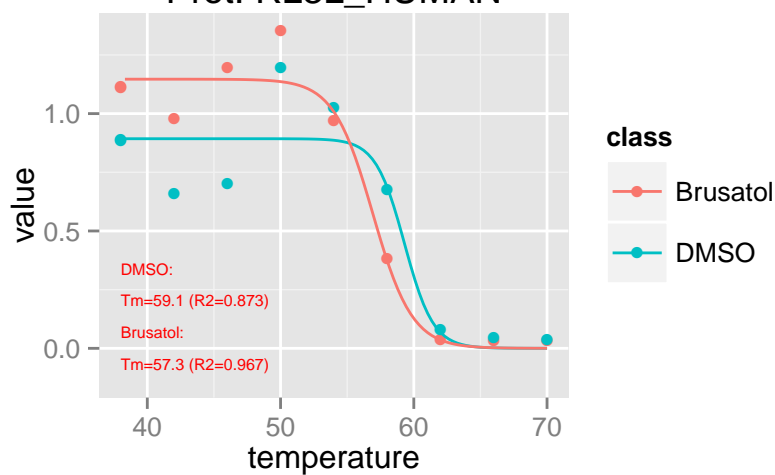

Prot: RL4\_HUMAN

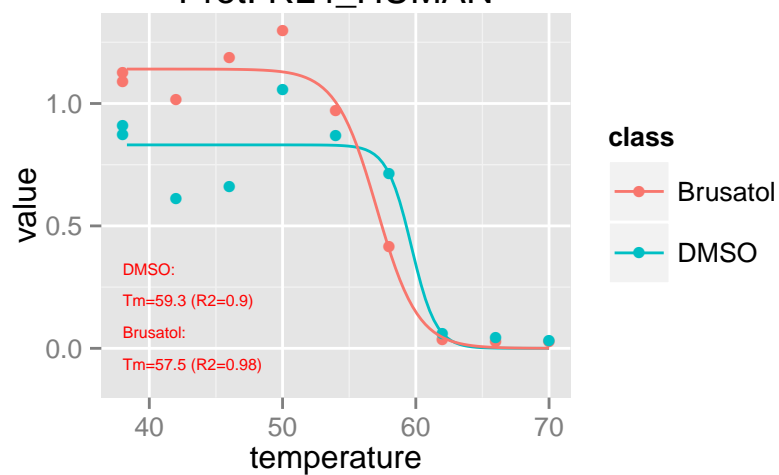

Prot: RL40\_HUMAN

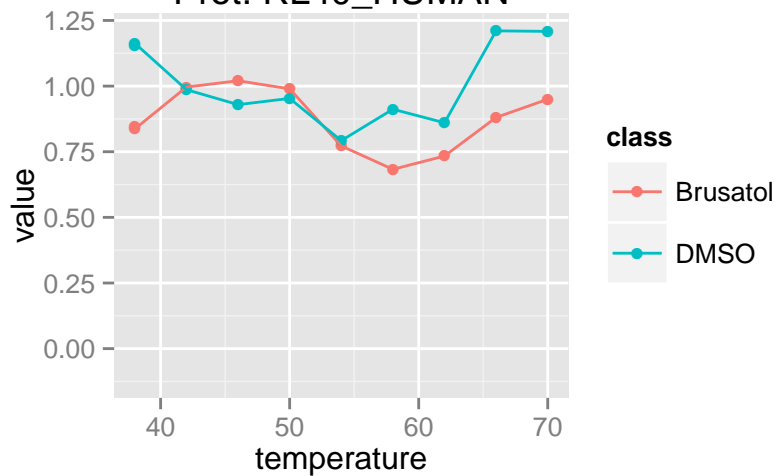

Prot: RL5\_HUMAN

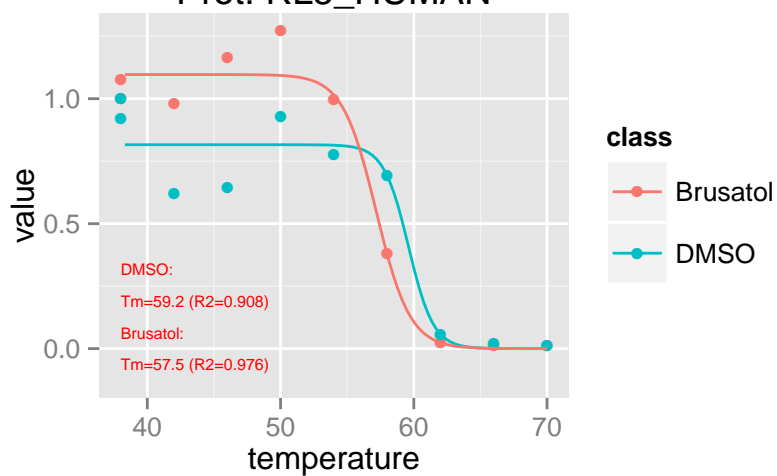

Prot: RL6\_HUMAN

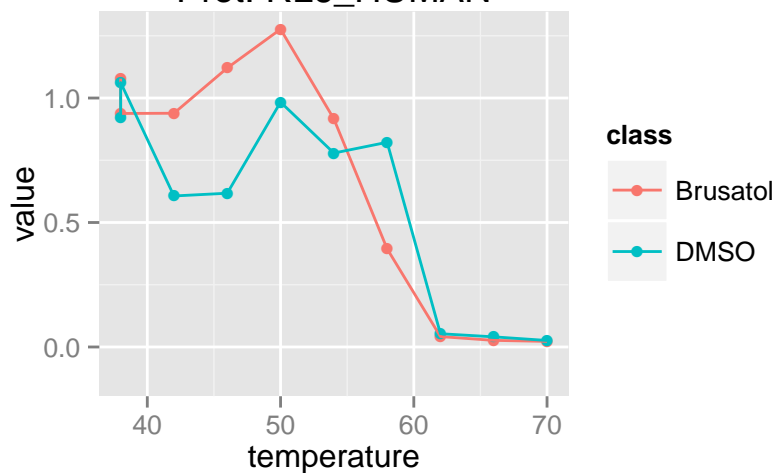

Prot: RL7\_HUMAN

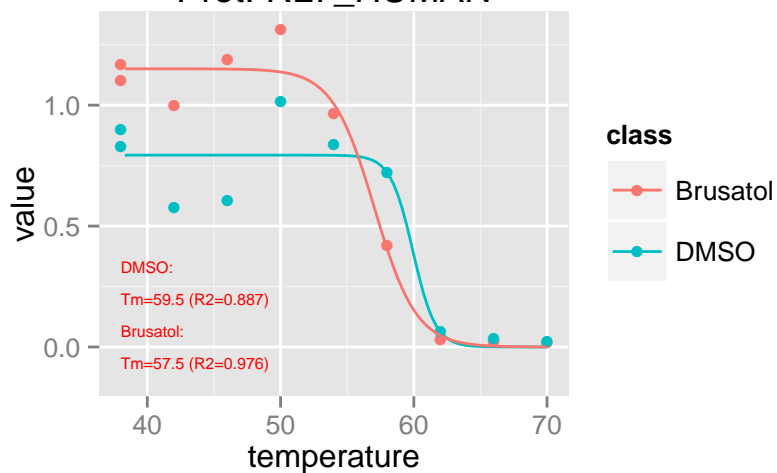

Prot: RL7A\_HUMAN

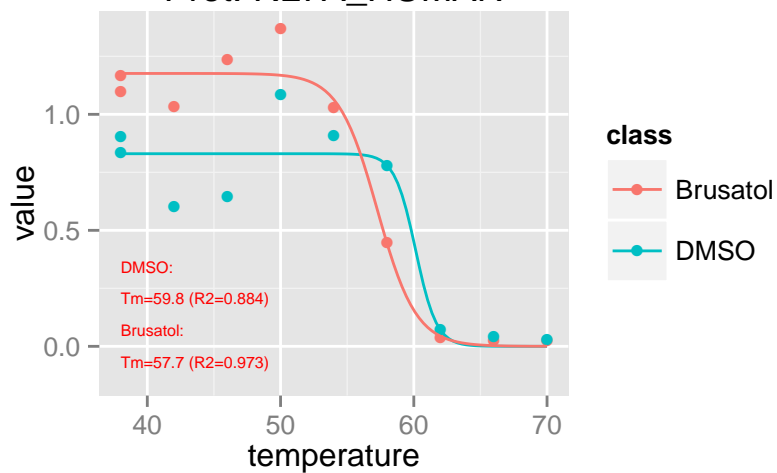

Prot: RL8\_HUMAN

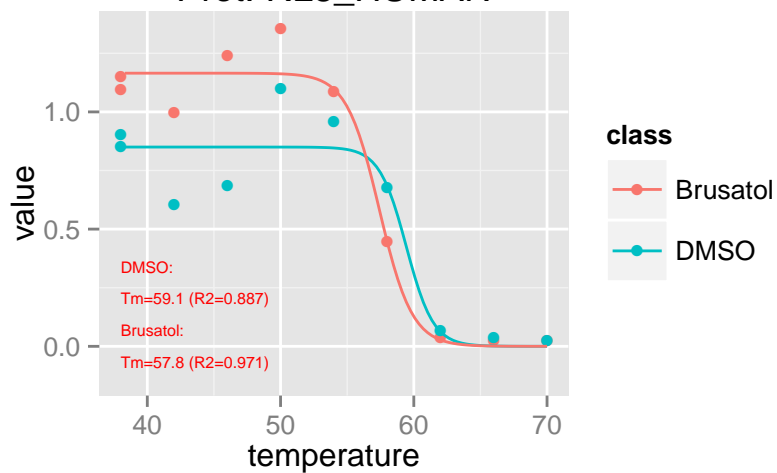

Prot: RL9\_HUMAN

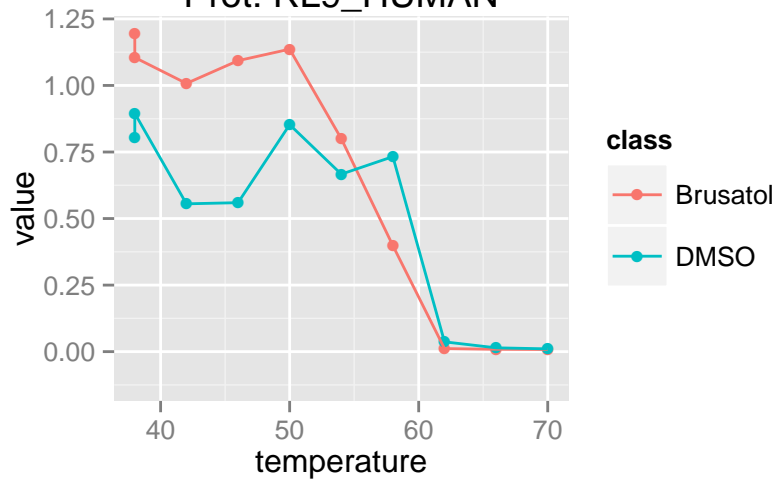

Prot: RLA0\_HUMAN

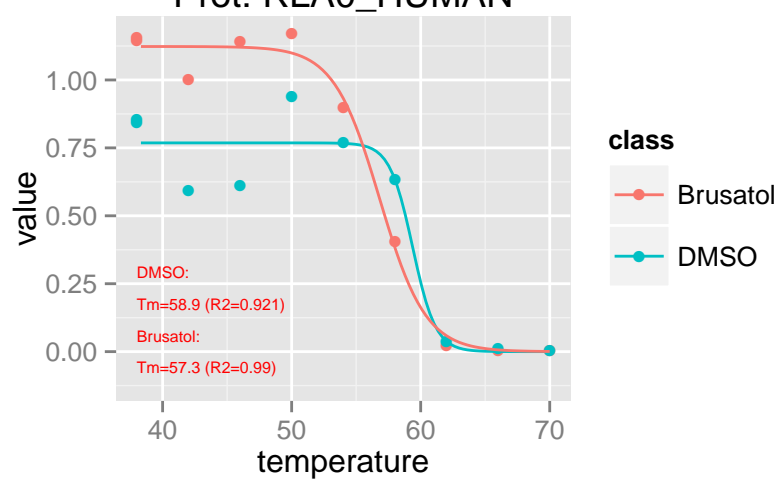

Prot: RLA0L\_HUMAN

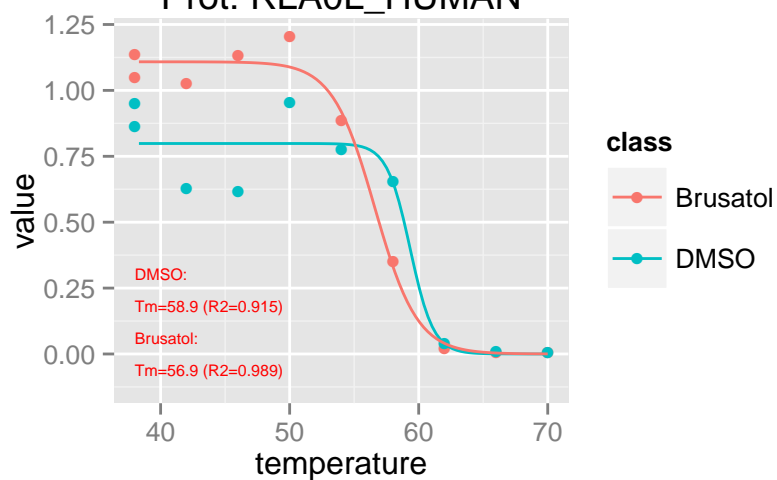

Prot: RLA1\_HUMAN

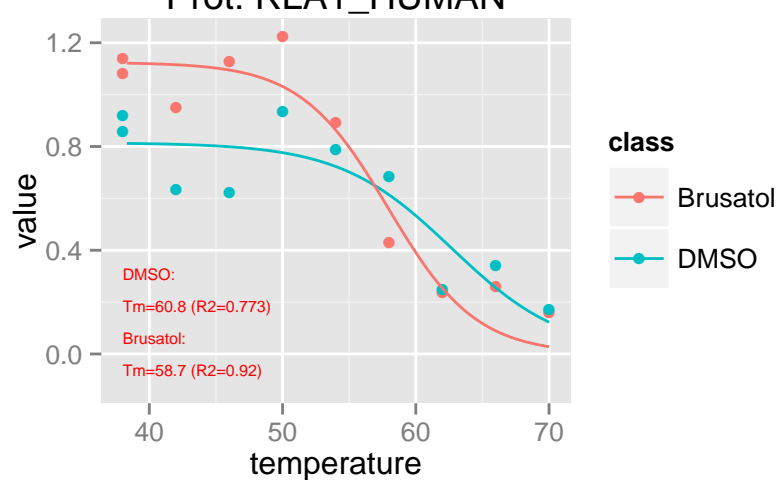

Prot: RLA2\_HUMAN

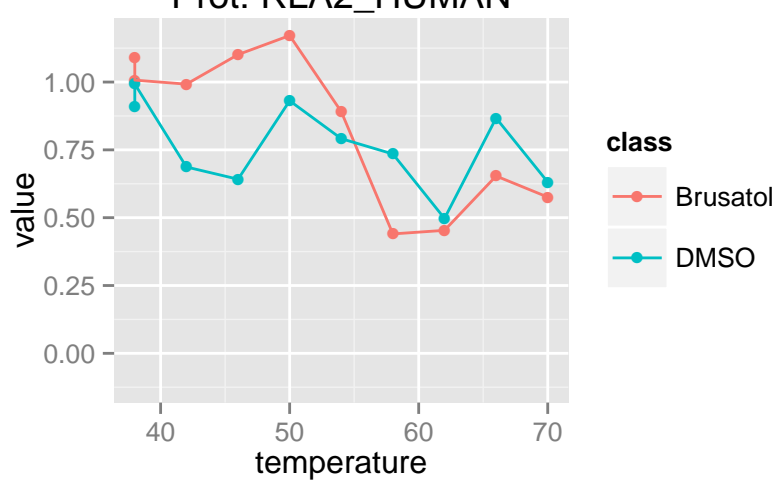

Prot: RLGPB\_HUMAN

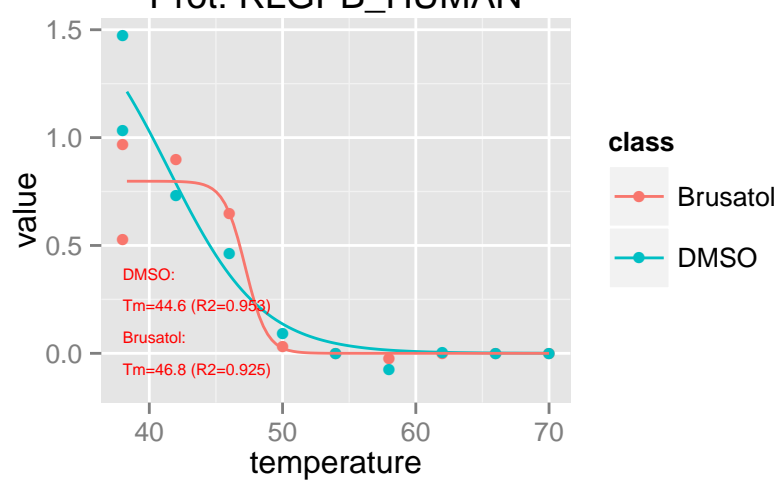

Prot: RM01\_HUMAN

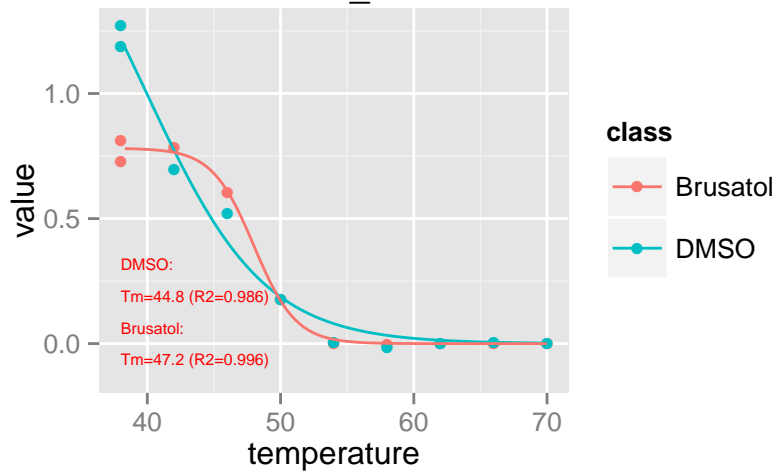

Prot: RM02\_HUMAN

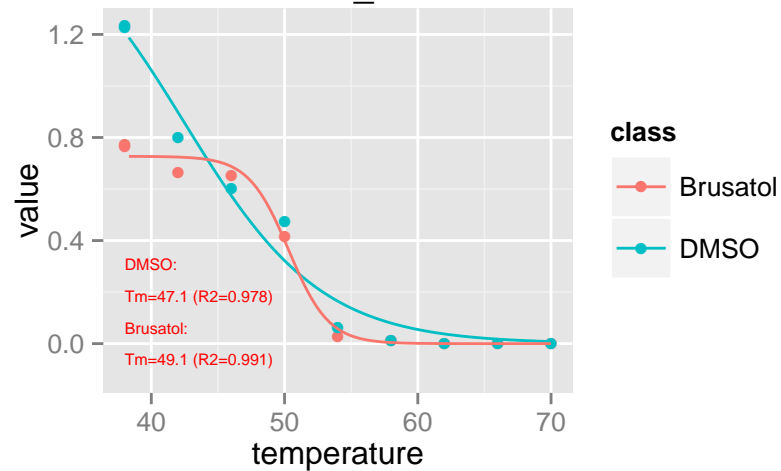

Prot: RM03\_HUMAN

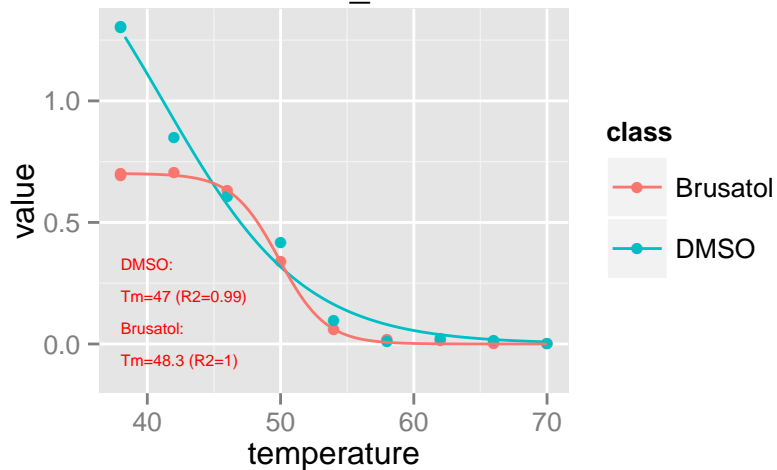

Prot: RM04\_HUMAN

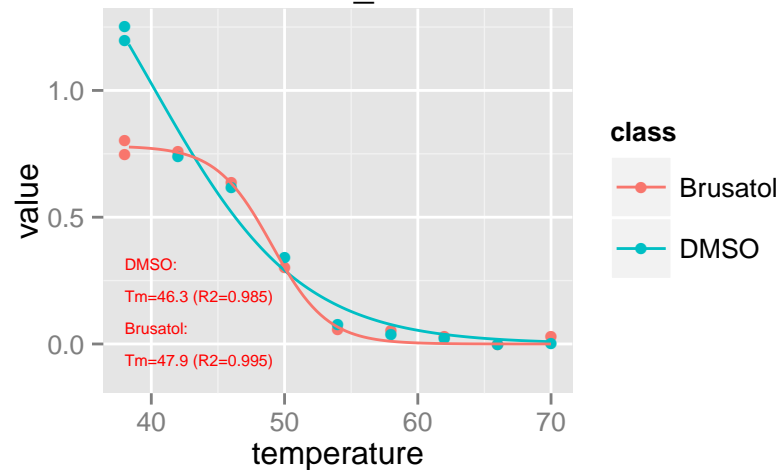

Prot: RM09\_HUMAN

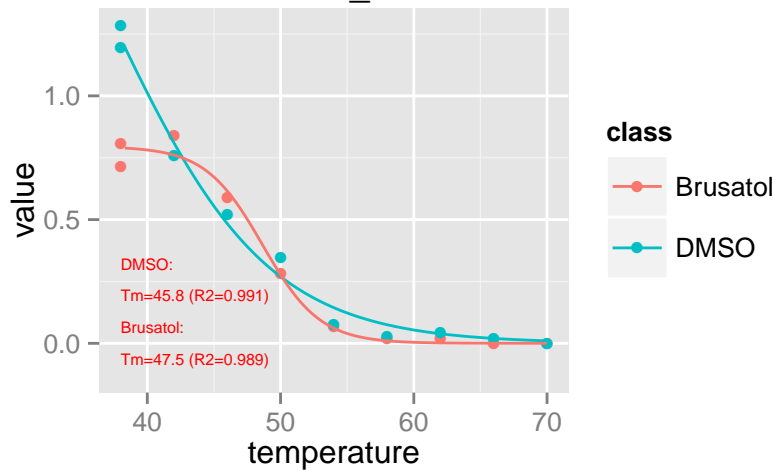

Prot: RM12\_HUMAN

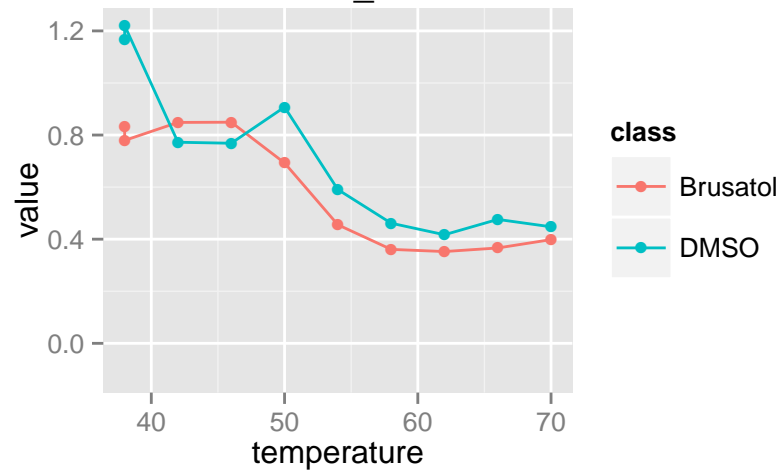

Prot: RM13\_HUMAN

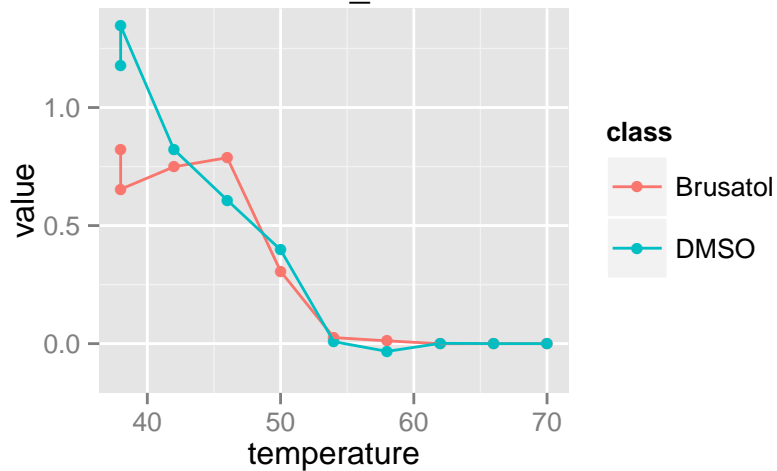

Prot: RM14\_HUMAN

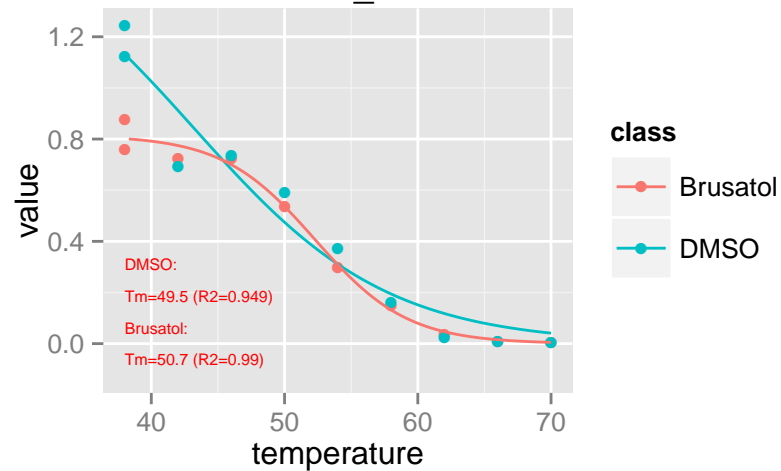

Prot: RM15\_HUMAN

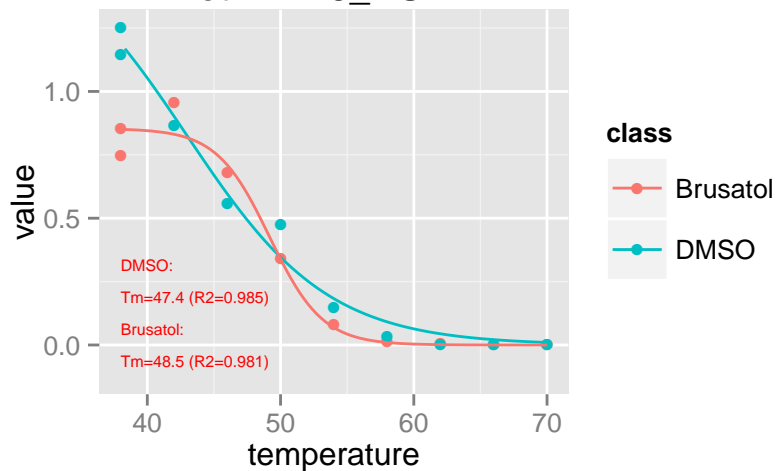

Prot: RM16\_HUMAN

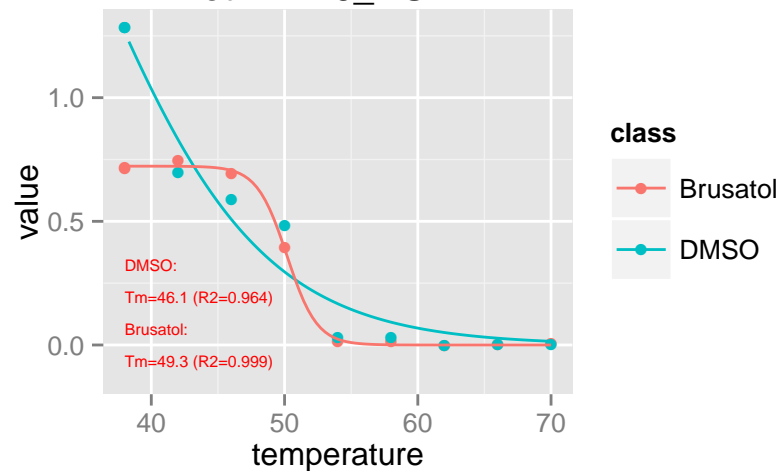

Prot: RM19\_HUMAN

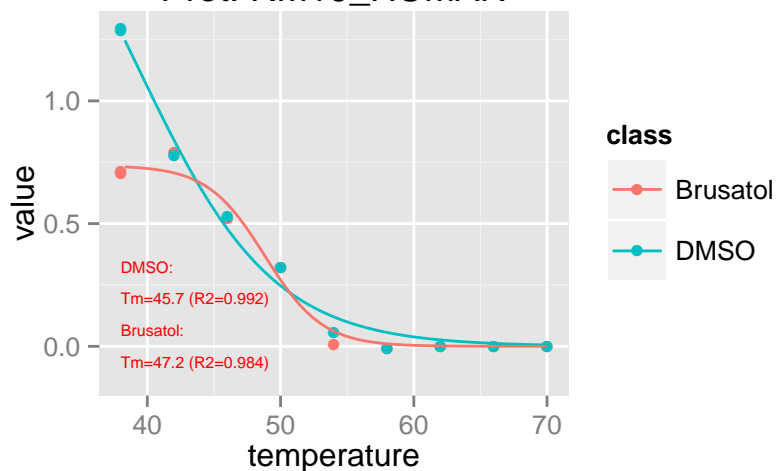

Prot: RM20\_HUMAN

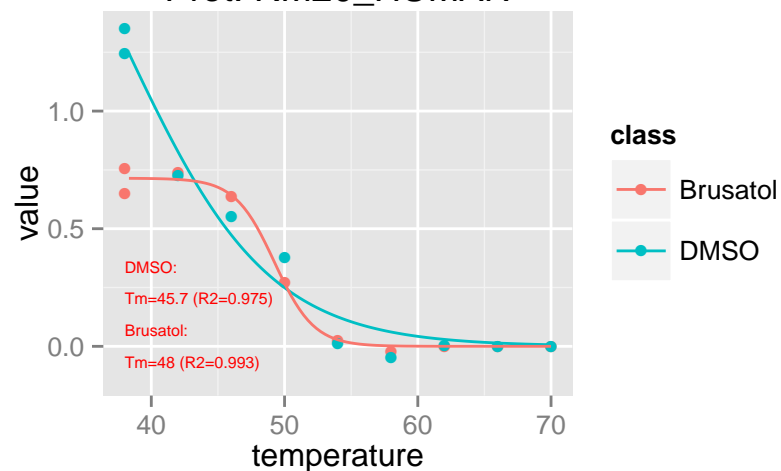

Prot: RM21\_HUMAN

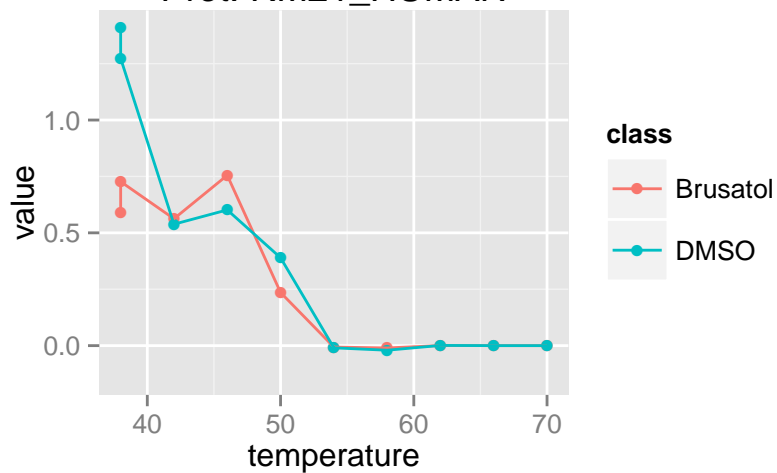

Prot: RM23\_HUMAN

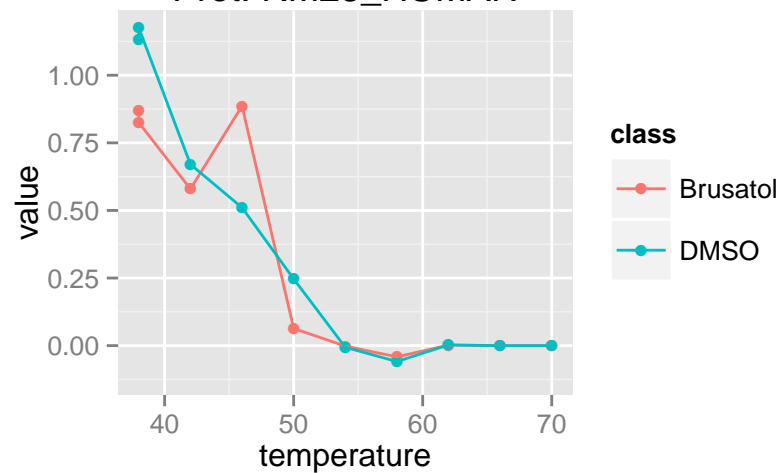

Prot: RM37\_HUMAN

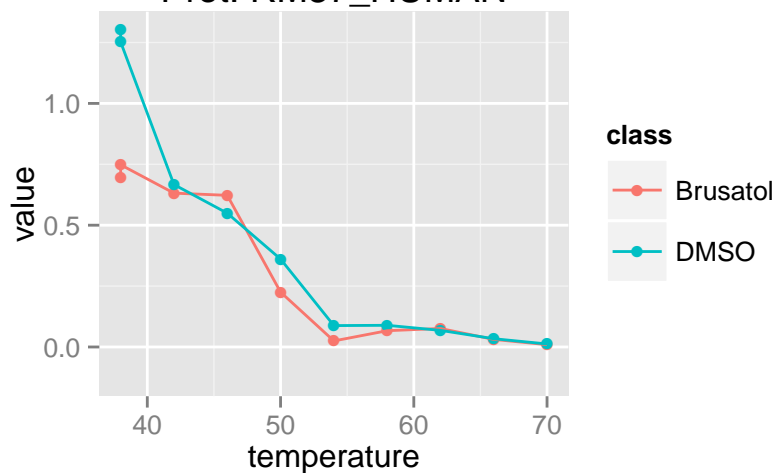

Prot: RM38\_HUMAN

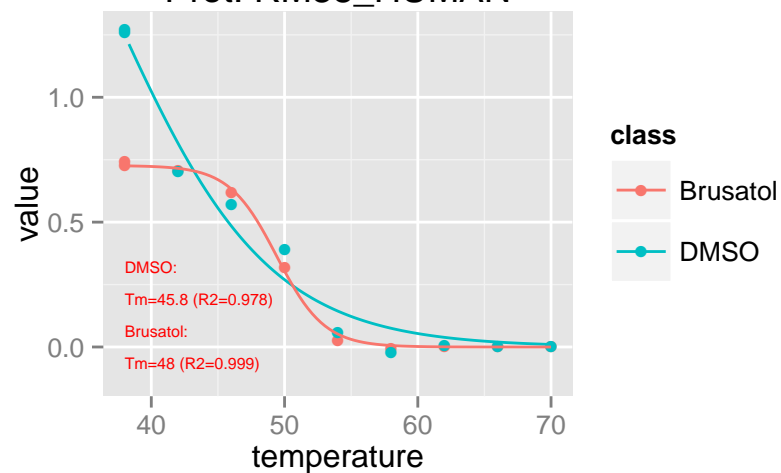

Prot: RM39\_HUMAN

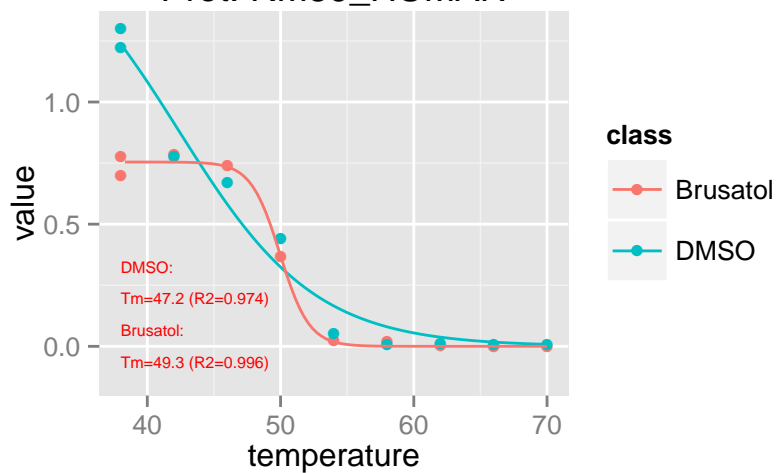

Prot: RM43\_HUMAN

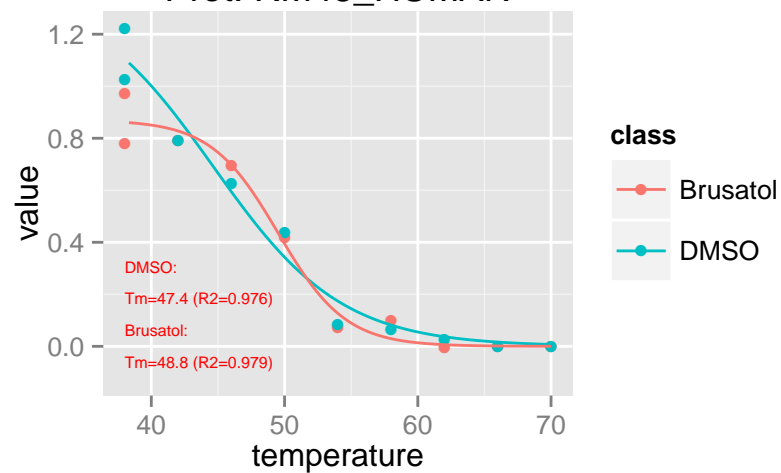



Prot: RM44\_HUMAN

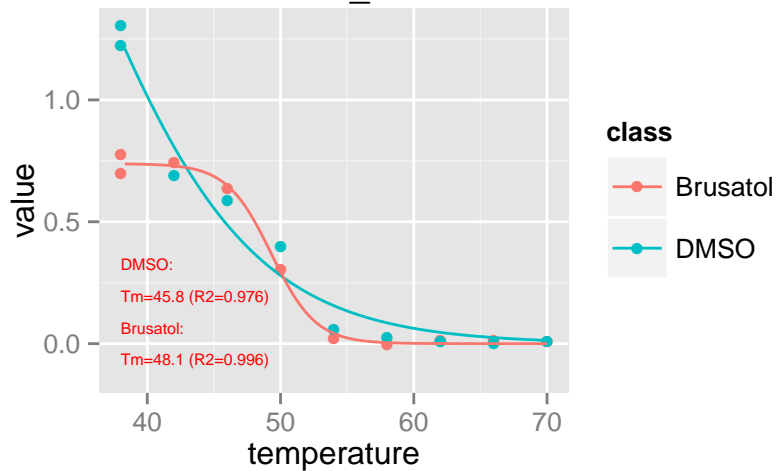

Prot: RM45\_HUMAN

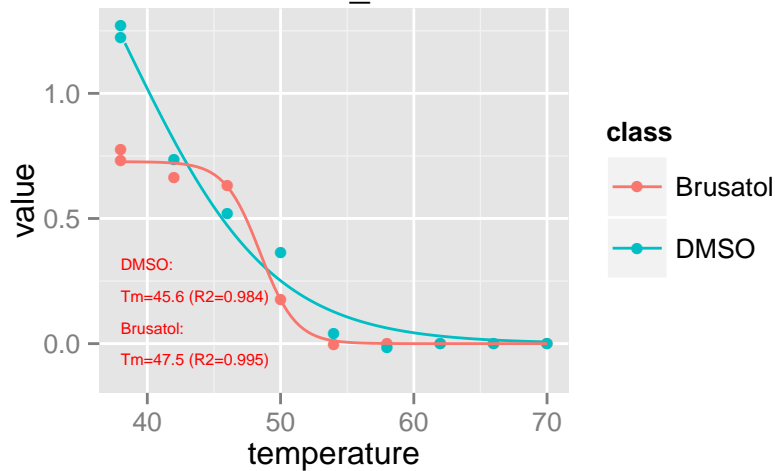

Prot: RM49\_HUMAN

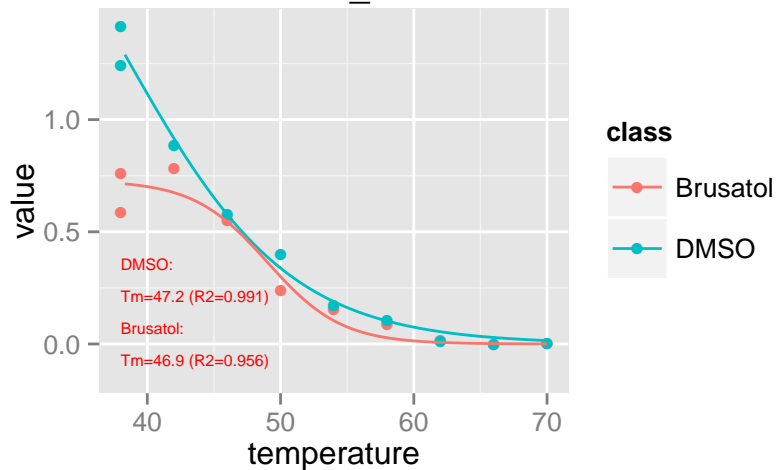

Prot: RM50\_HUMAN

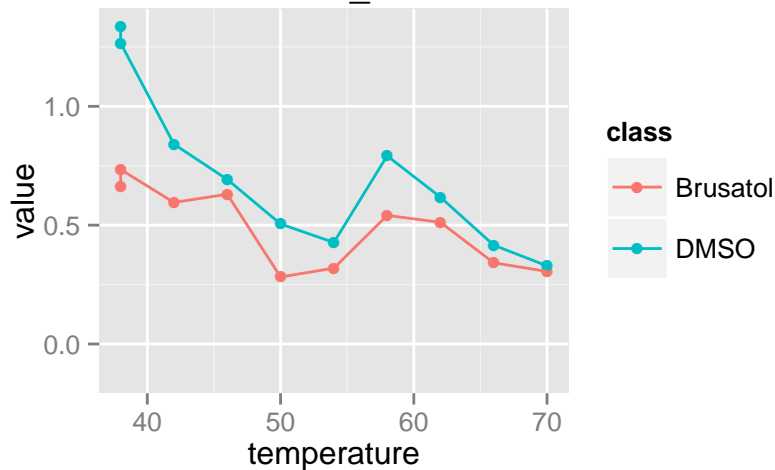

Prot: RM53\_HUMAN

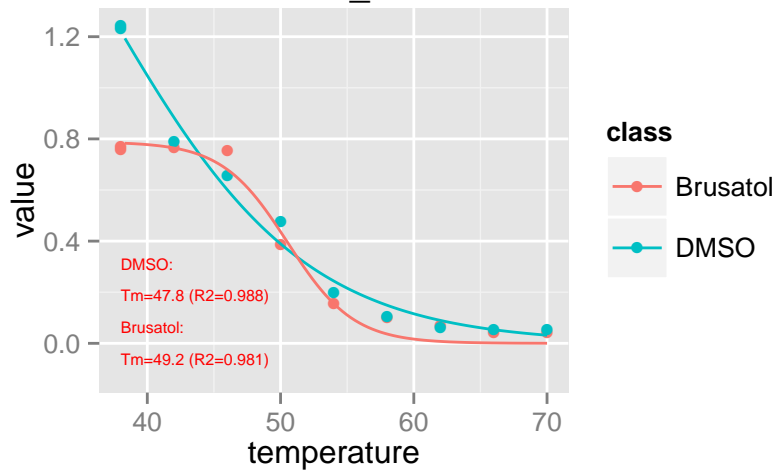

Prot: RM55\_HUMAN

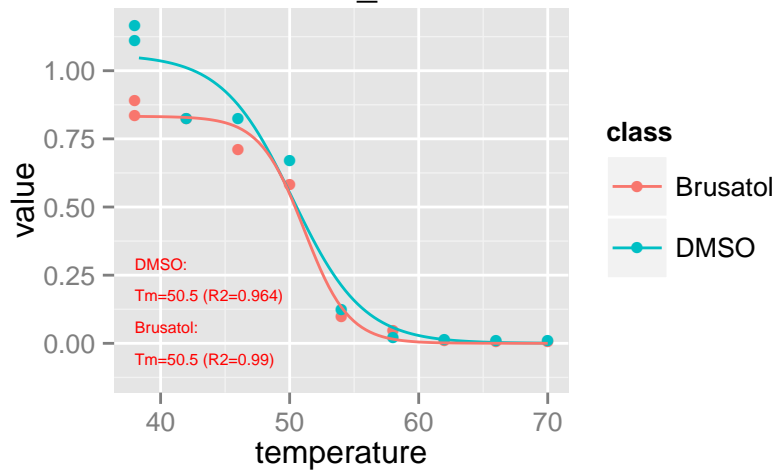

Prot: RMP\_HUMAN

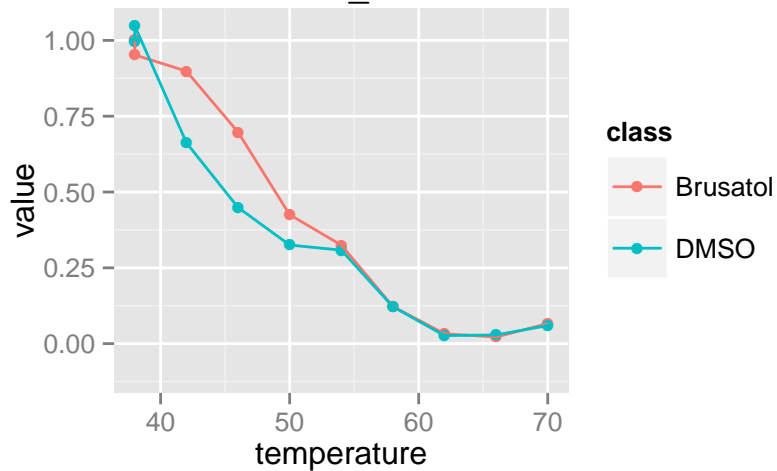

Prot: RN114\_HUMAN

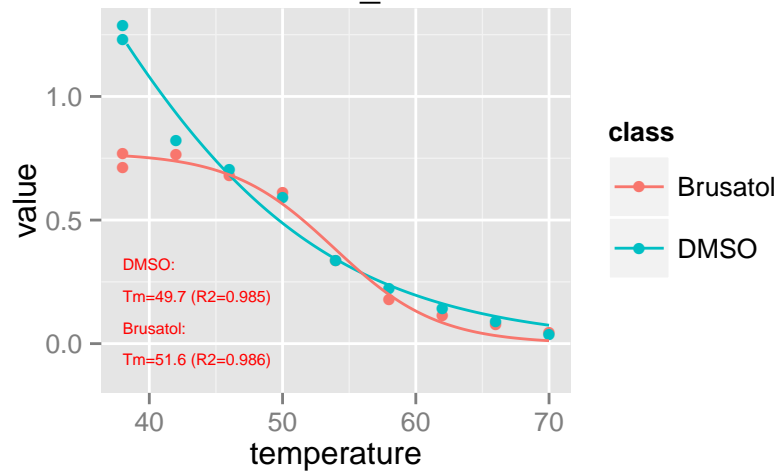

Prot: RN126\_HUMAN

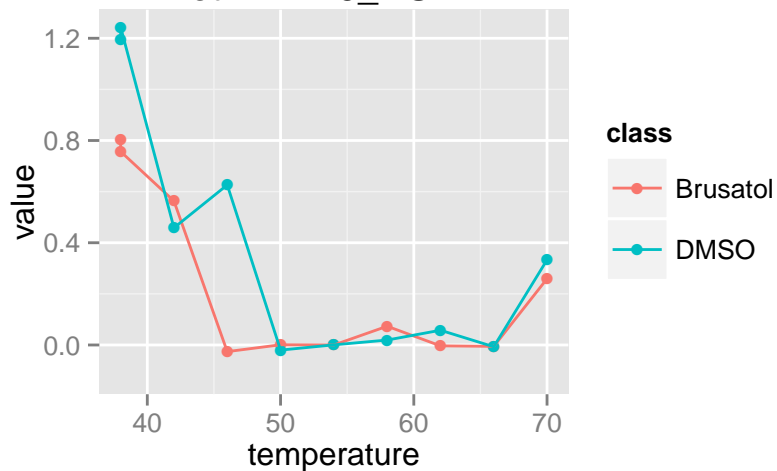

Prot: RN181\_HUMAN

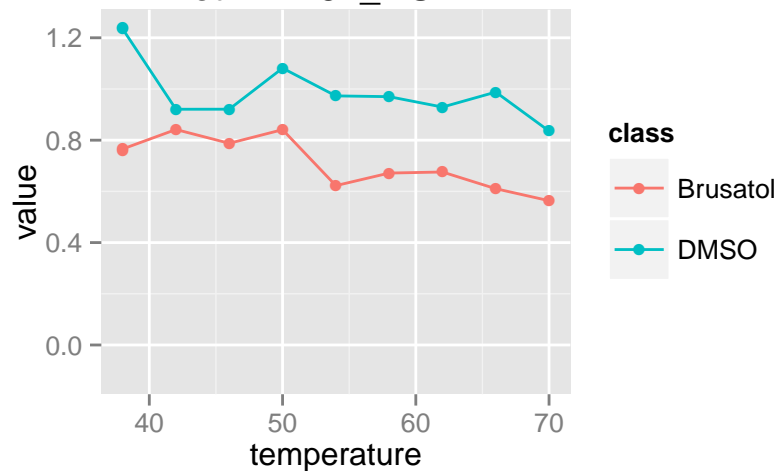

Prot: RN213\_HUMAN

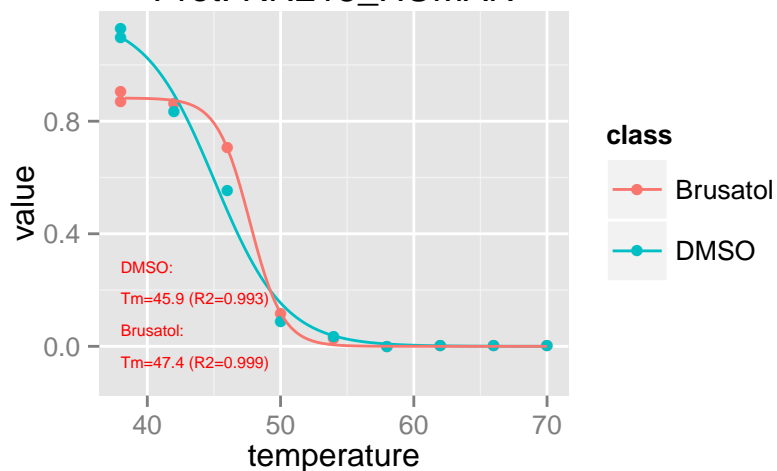

Prot: RN214\_HUMAN

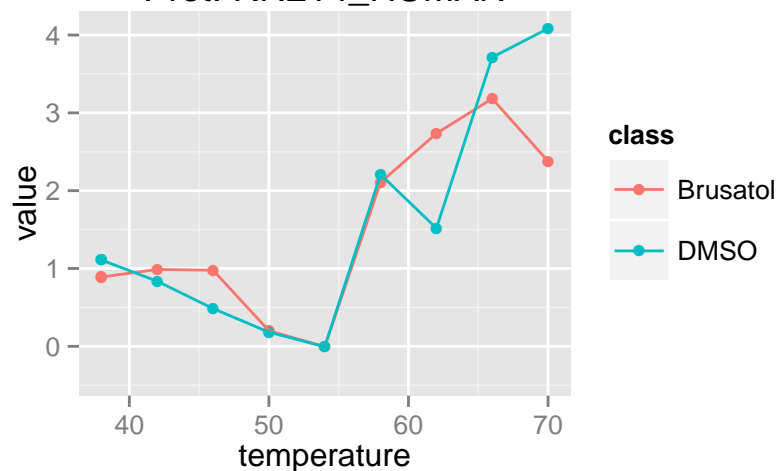

Prot: RNBP6\_HUMAN

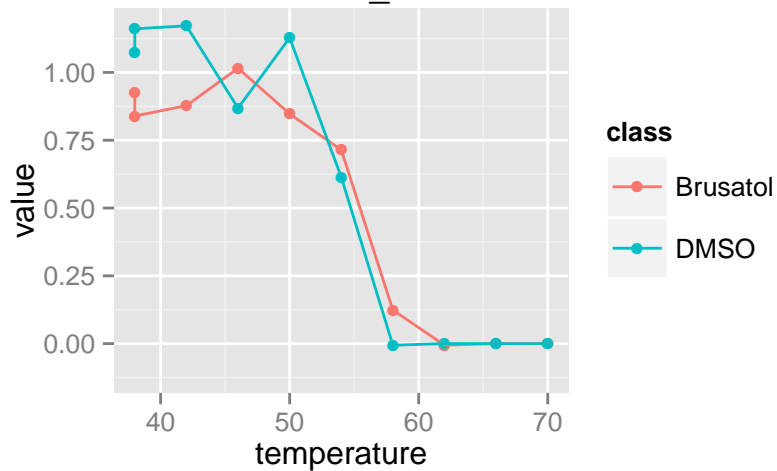

Prot: RNF14\_HUMAN

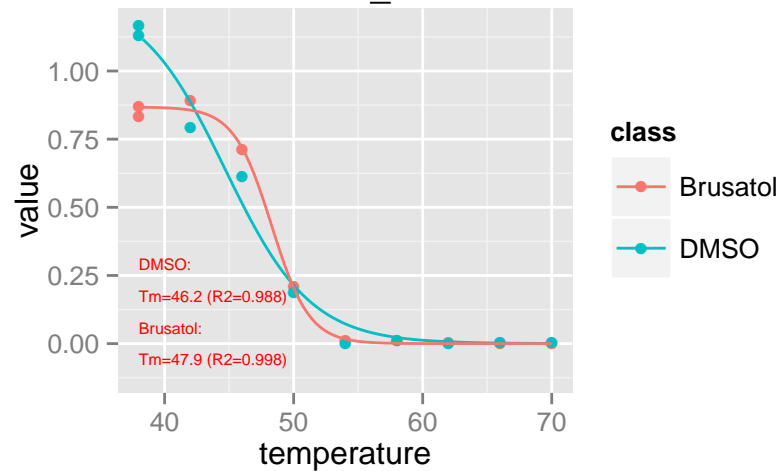

Prot: RNF25\_HUMAN

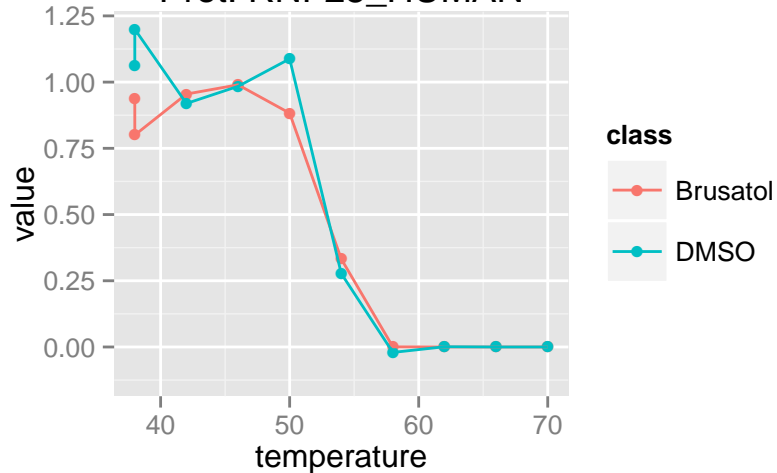

Prot: RNH2A\_HUMAN

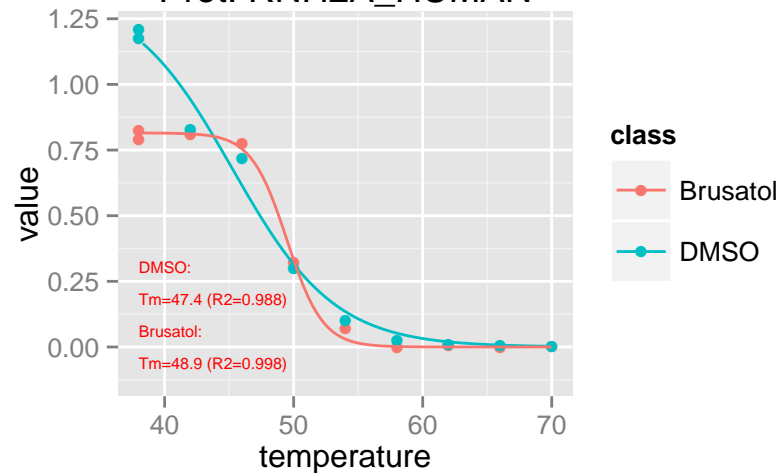

Prot: RNH2B\_HUMAN

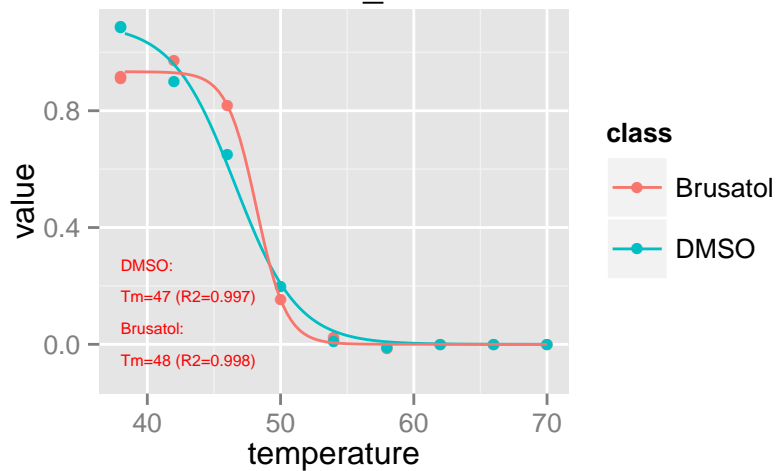

Prot: RNH2C\_HUMAN

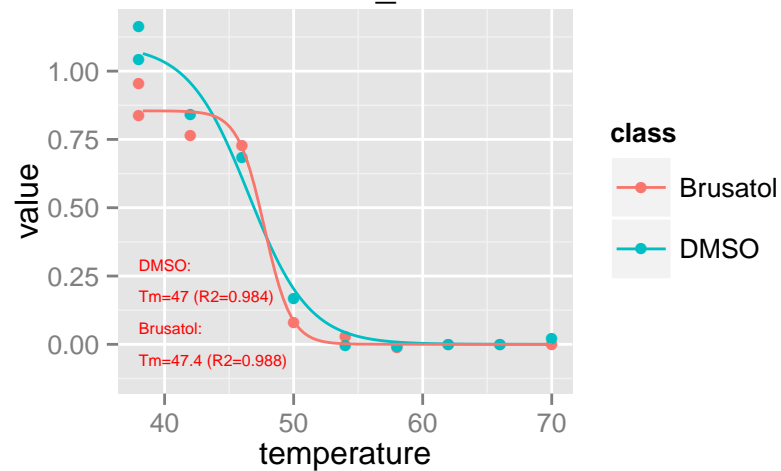

Prot: RNT2\_HUMAN

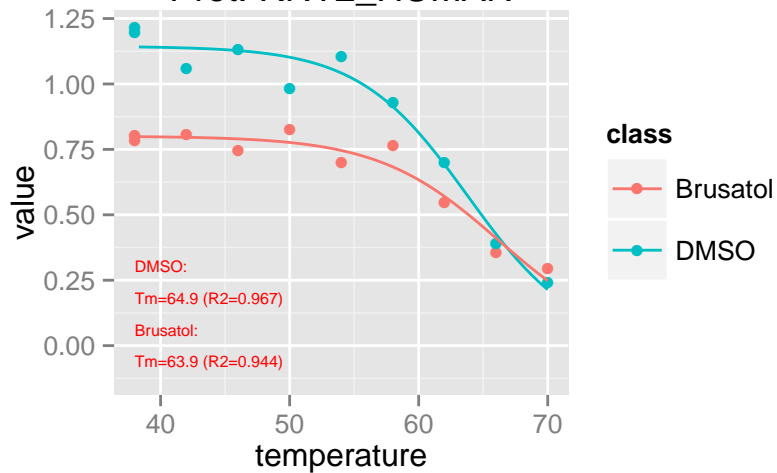

Prot: RNZ2\_HUMAN

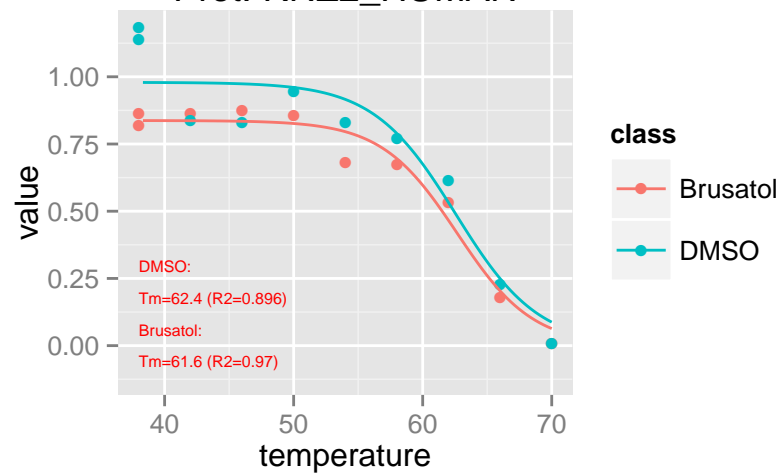

Prot: RO52\_HUMAN

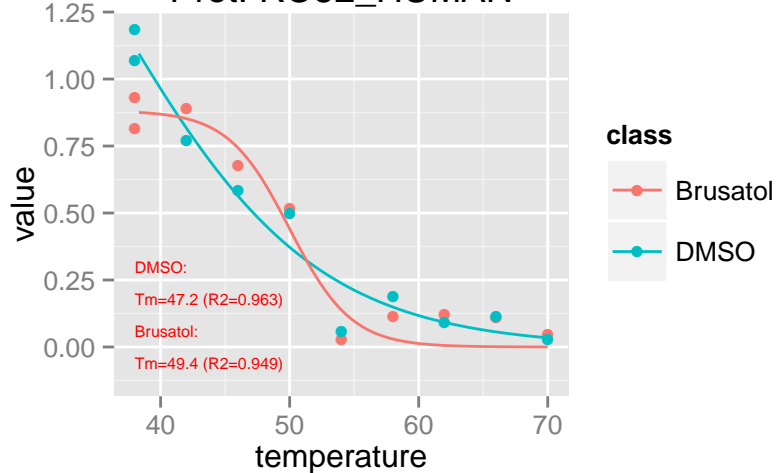

Prot: RO60\_HUMAN

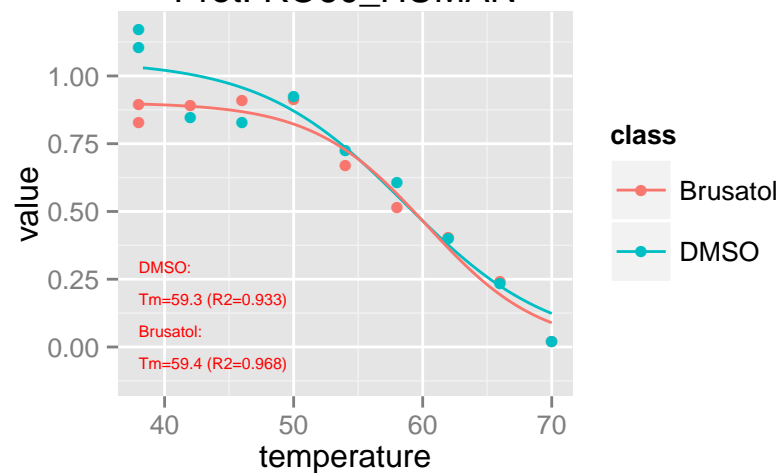

Prot: ROA0\_HUMAN

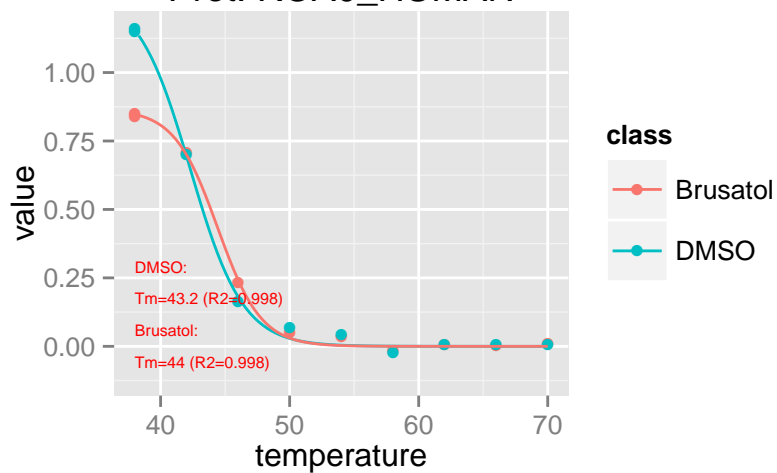

Prot: ROA1\_HUMAN

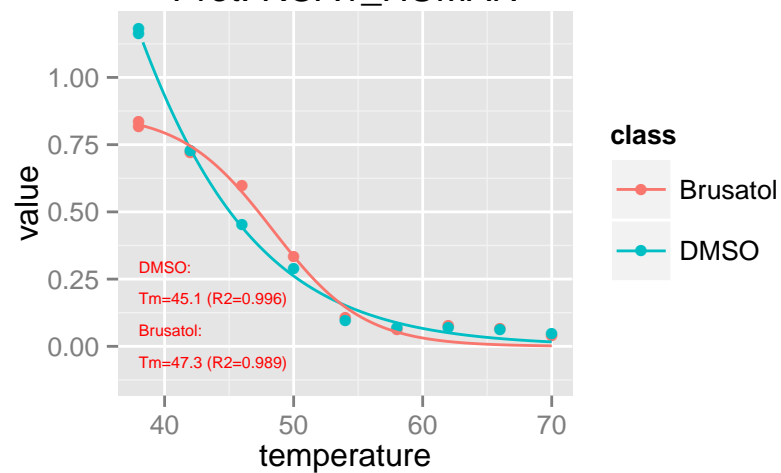

Prot: ROA2\_HUMAN

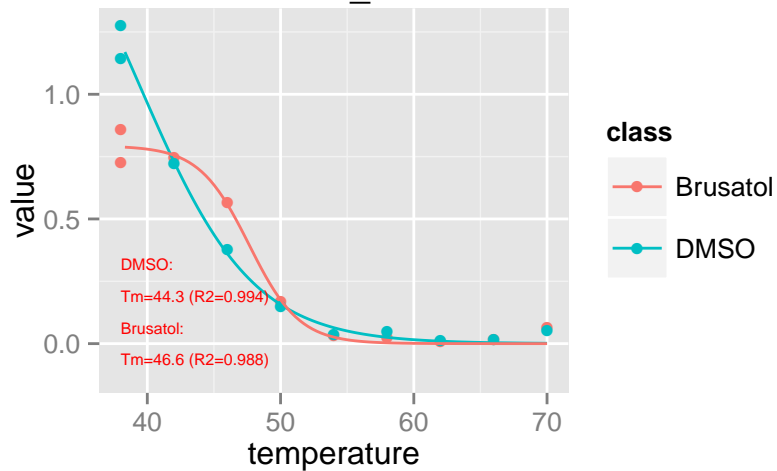

Prot: ROA3\_HUMAN

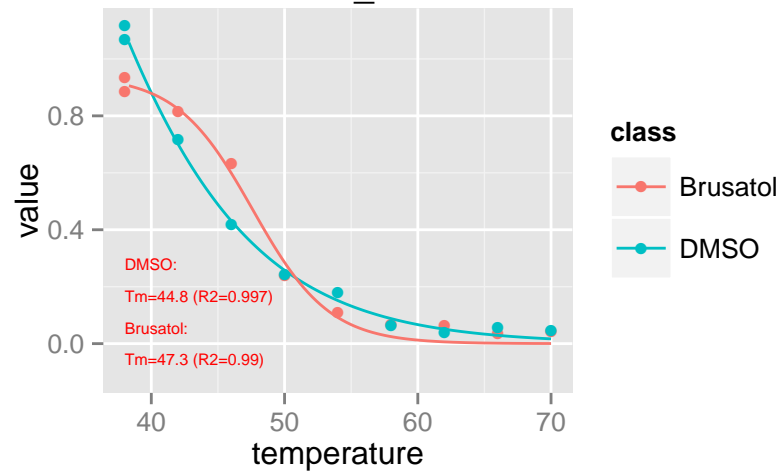

Prot: ROAA\_HUMAN

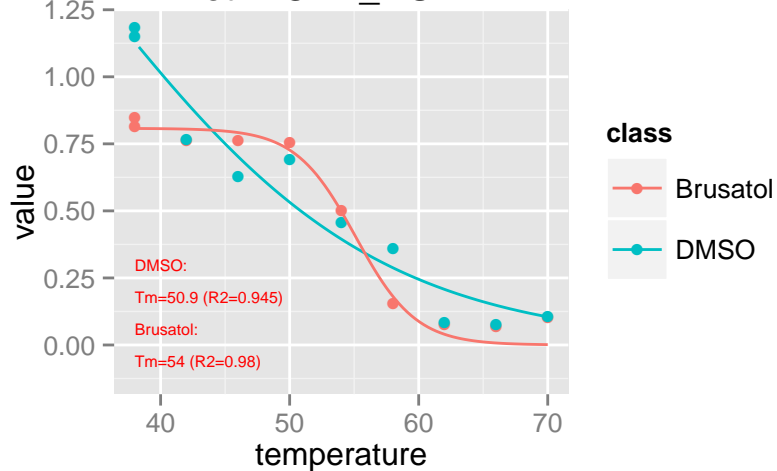

Prot: ROCK1\_HUMAN

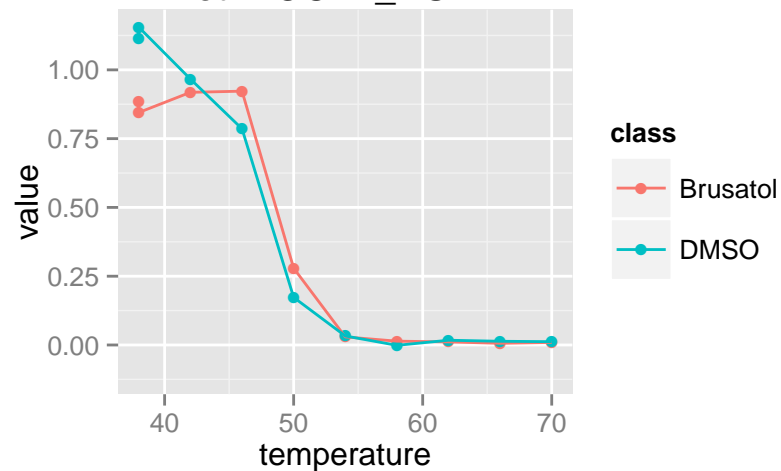

Prot: ROCK2\_HUMAN

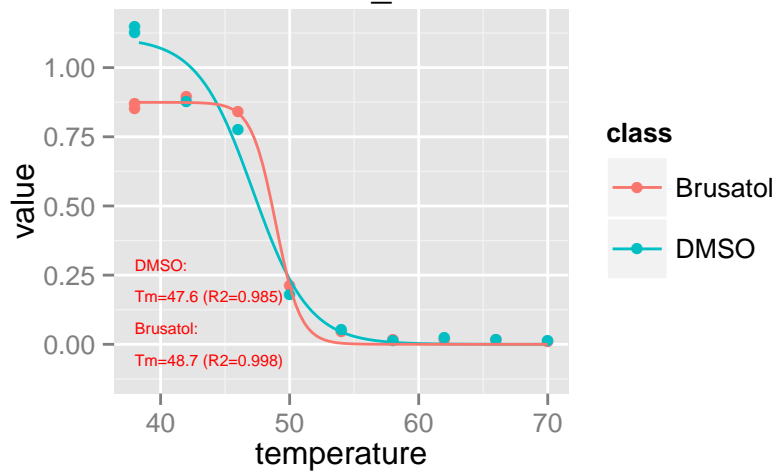

Prot: ROD1\_HUMAN

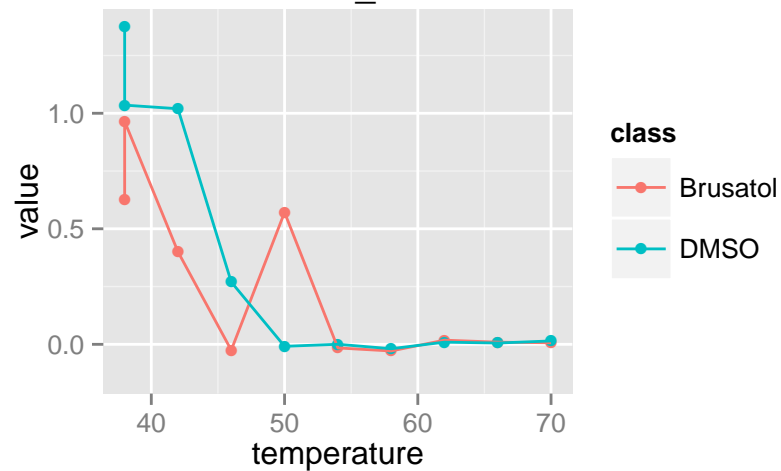

Prot: RPA1\_HUMAN

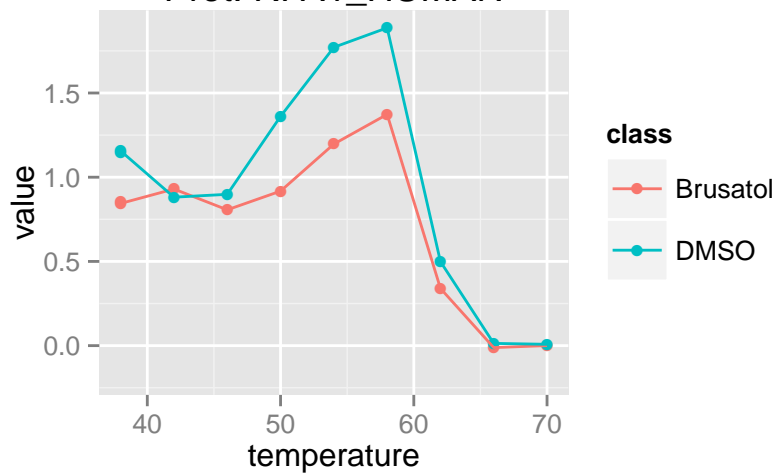

Prot: RPA34\_HUMAN

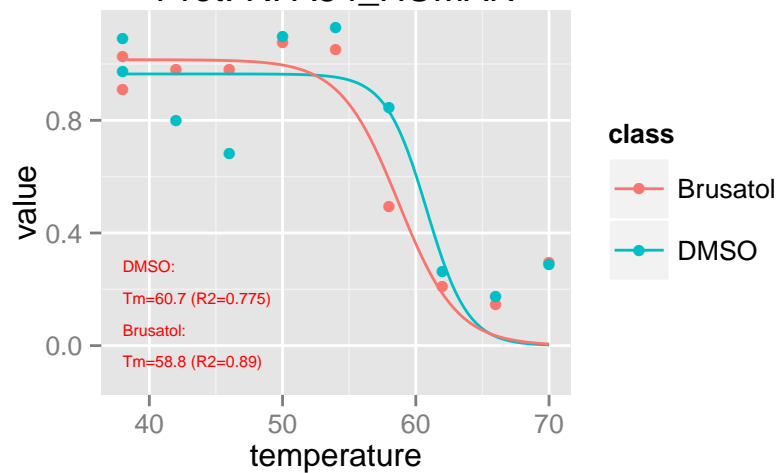

Prot: RPA49\_HUMAN

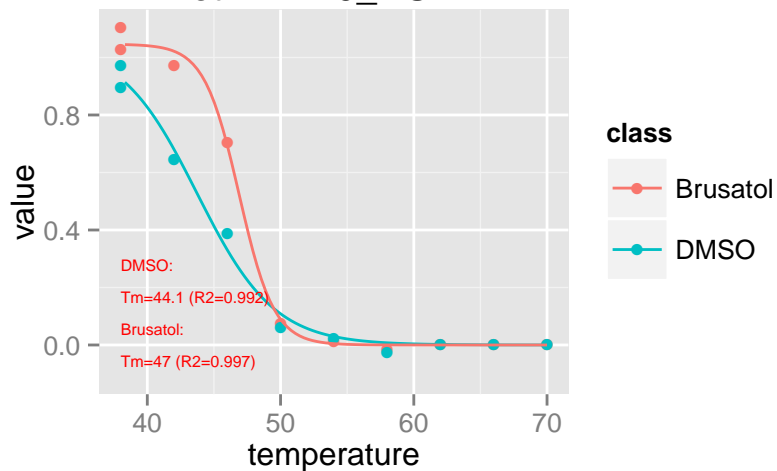

Prot: RPAB1\_HUMAN

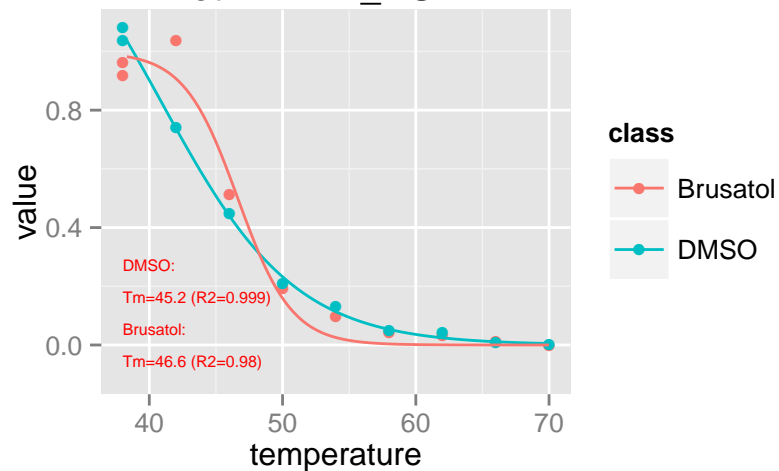

Prot: RPAB3\_HUMAN

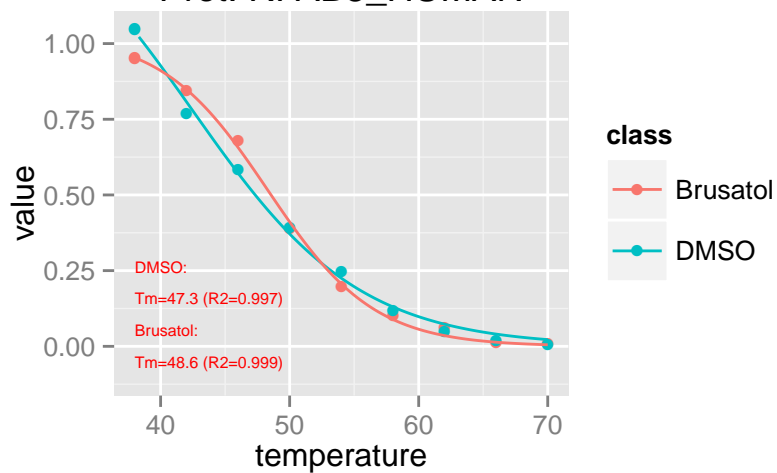

Prot: RPAC1\_HUMAN

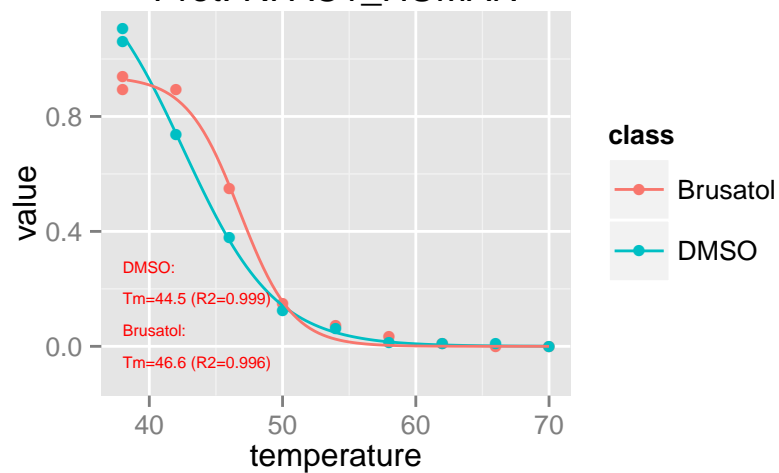

Prot: RPAP3\_HUMAN

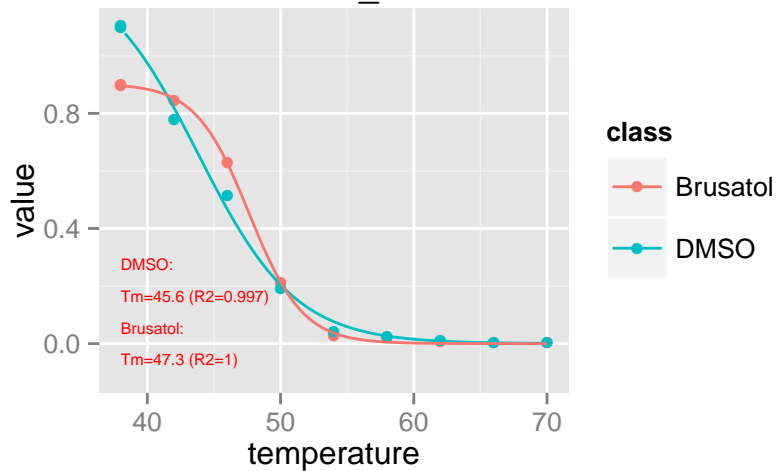

Prot: RPB1\_HUMAN

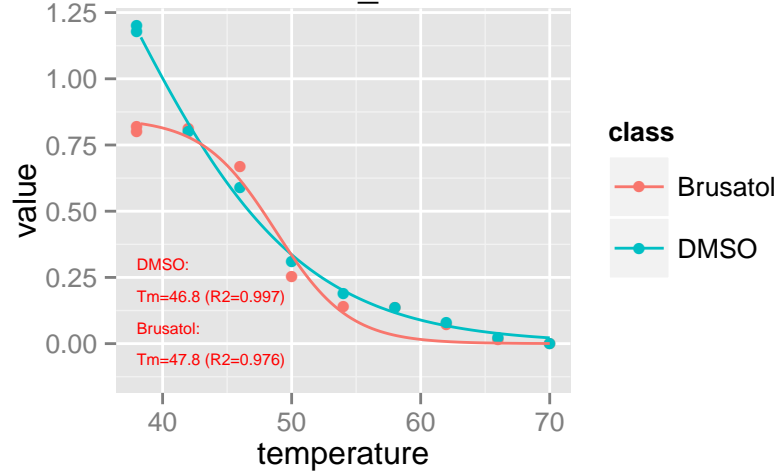

Prot: RPB2\_HUMAN

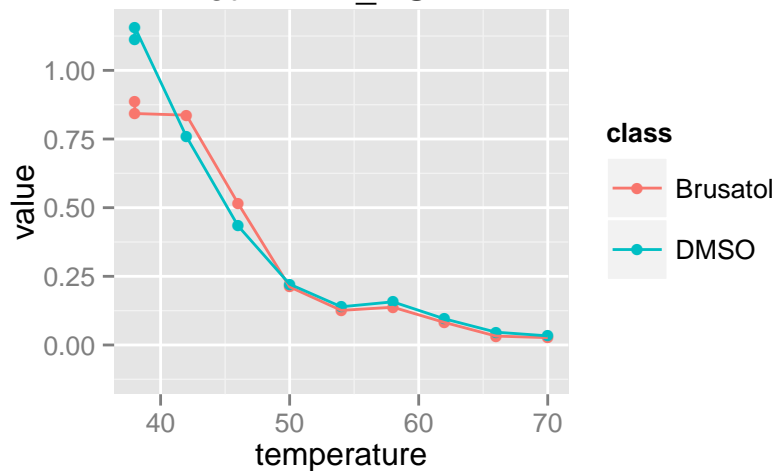

Prot: RPB3\_HUMAN

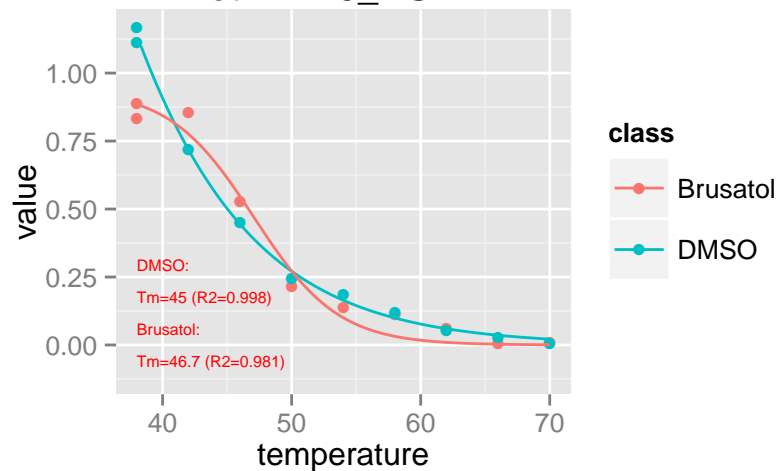

Prot: RPB4\_HUMAN

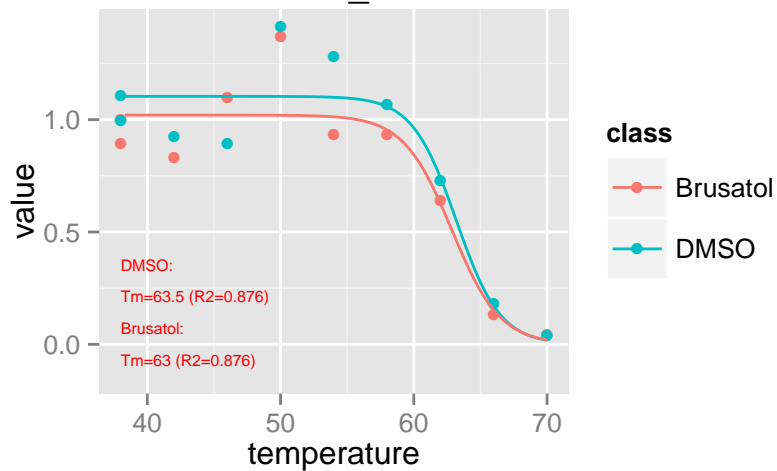

Prot: RPB7\_HUMAN

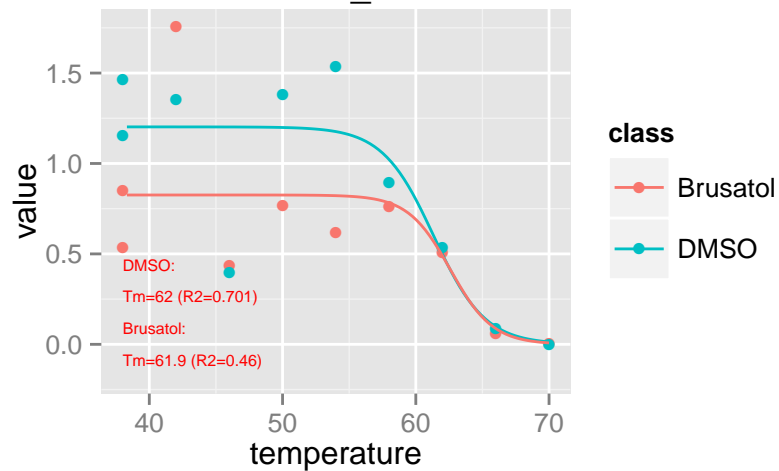

Prot: RPB9\_HUMAN

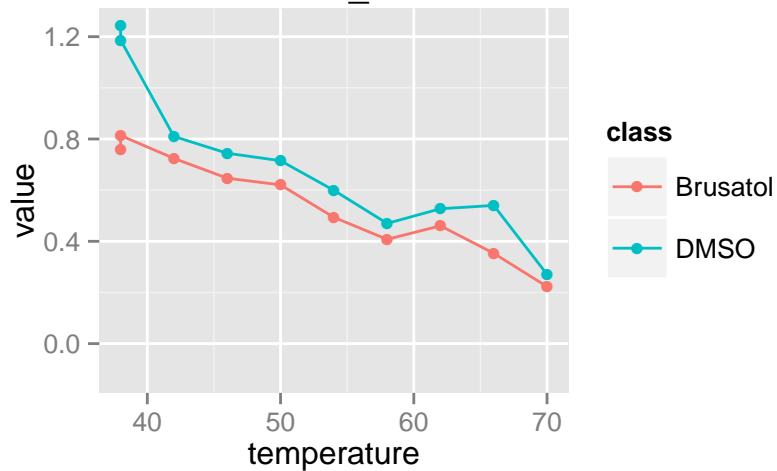

Prot: RPC1\_HUMAN

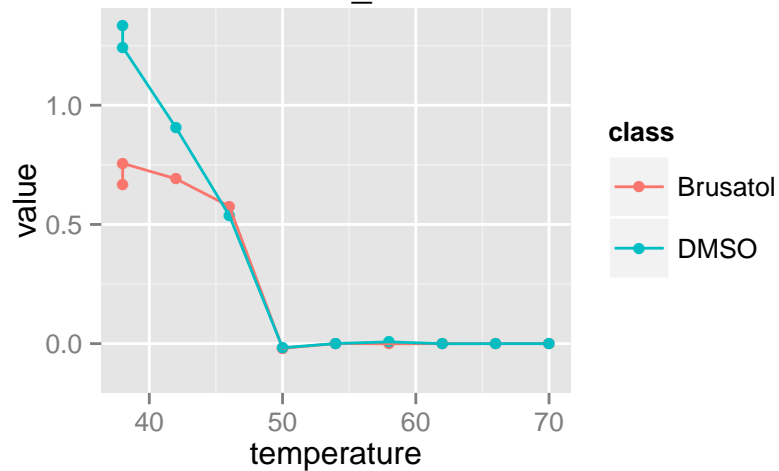

Prot: RPC3\_HUMAN

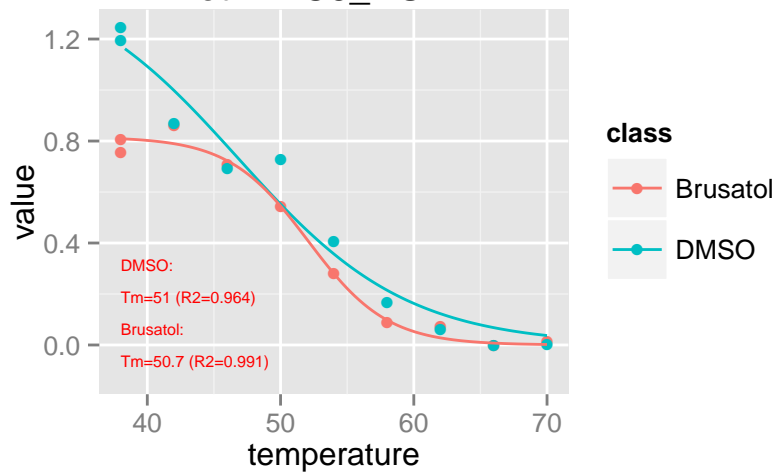

Prot: RPC4\_HUMAN

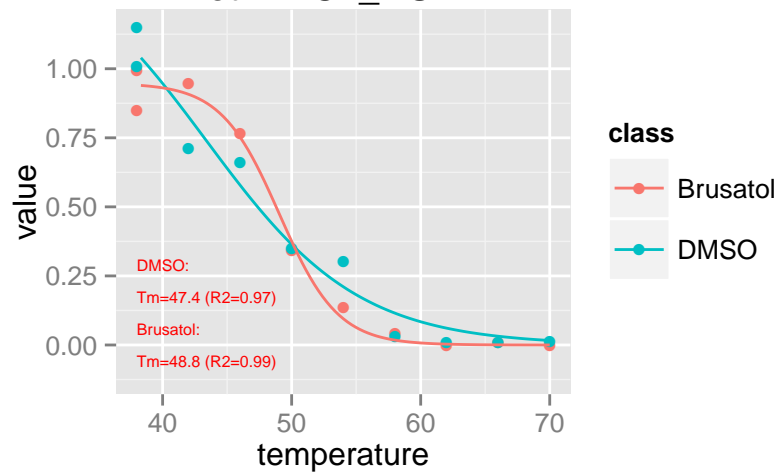

Prot: RPE\_HUMAN

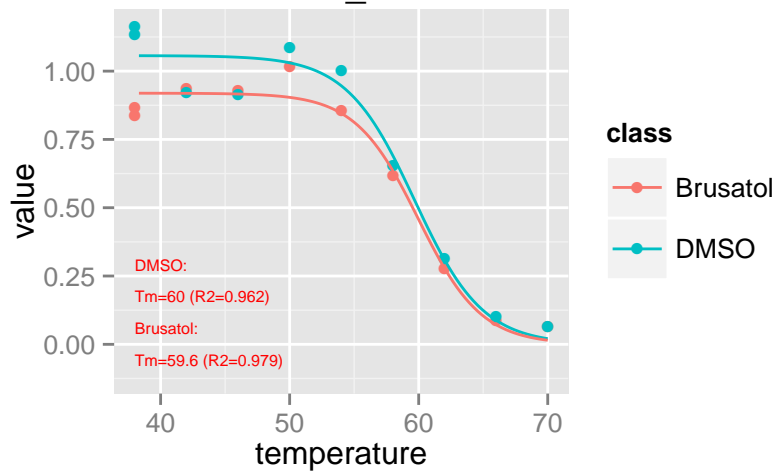

Prot: RGP1\_HUMAN

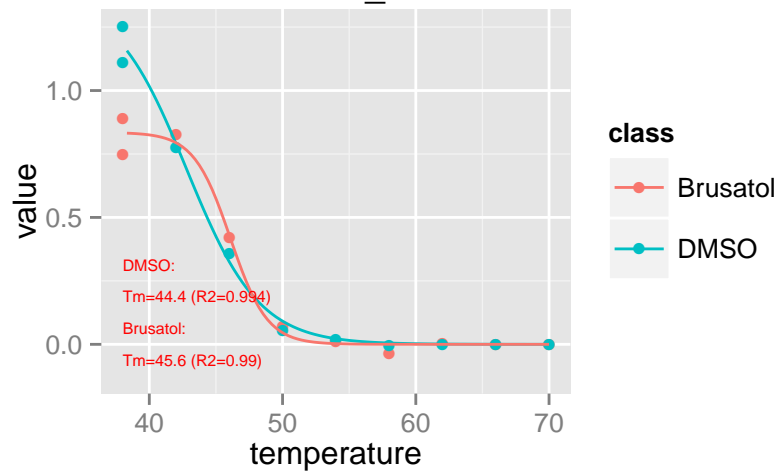



Prot: RPIA\_HUMAN

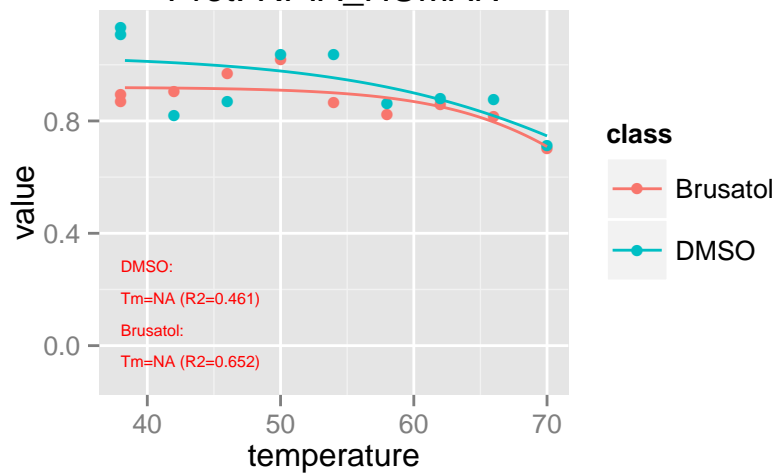

Prot: RPOM\_HUMAN

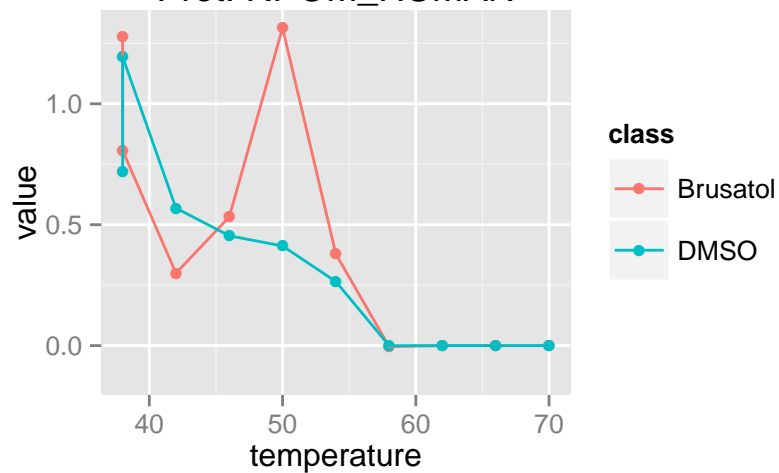

Prot: RPP25\_HUMAN

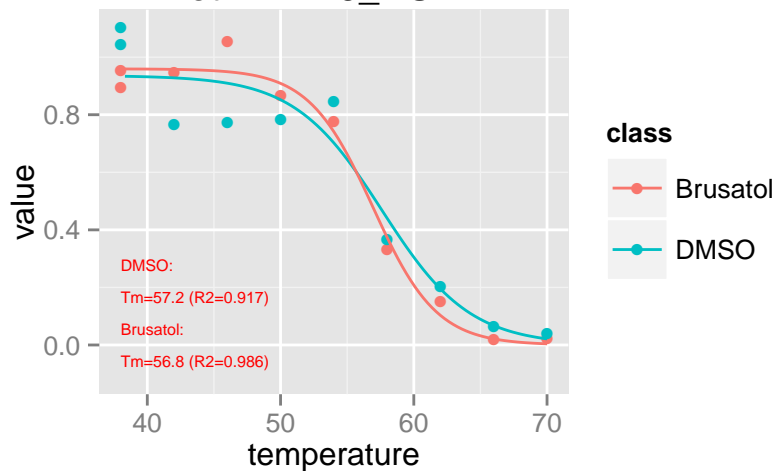

Prot: RPP30\_HUMAN

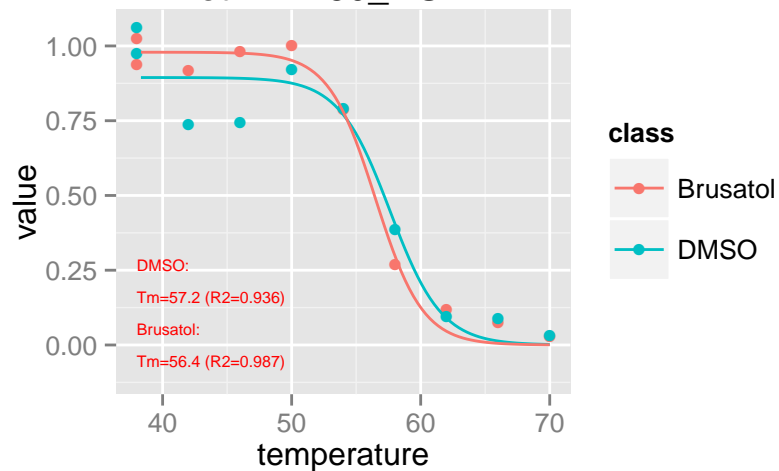

Prot: RPP40\_HUMAN

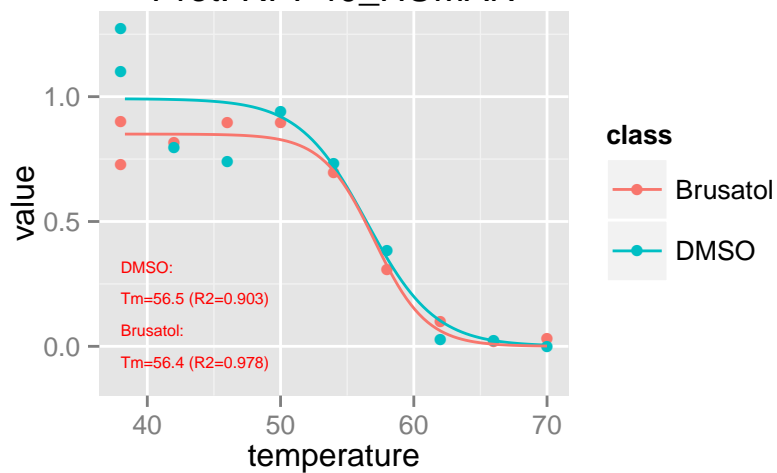

Prot: RPR1B\_HUMAN

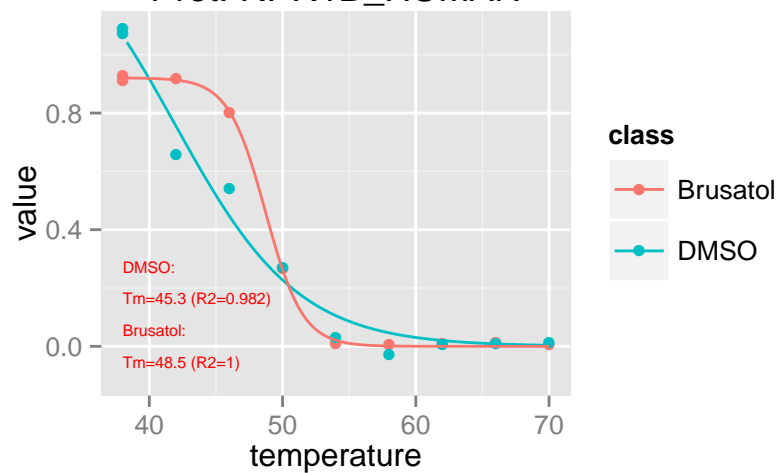

Prot: RPRD2\_HUMAN

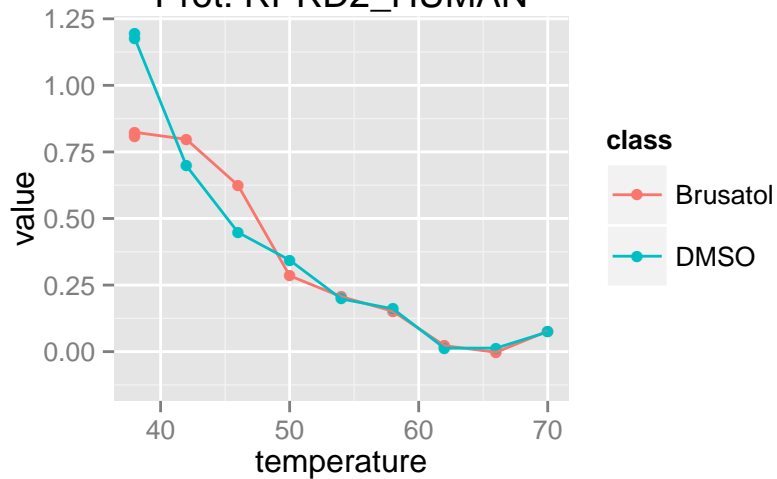

Prot: RPTOR\_HUMAN

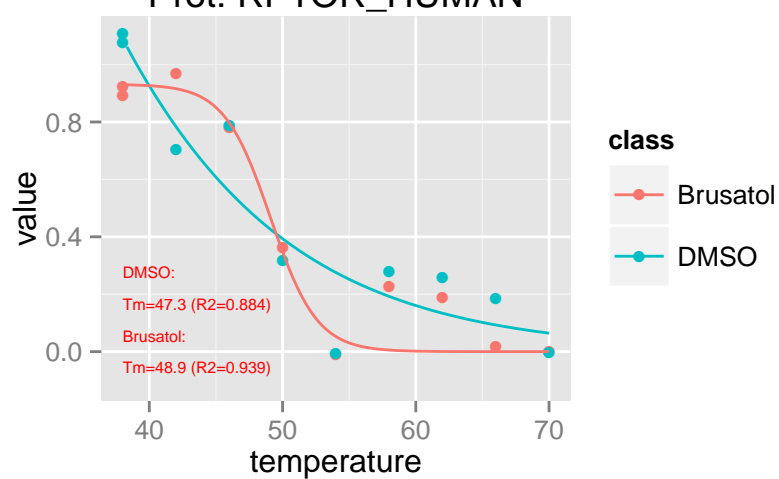

Prot: RRAGA\_HUMAN

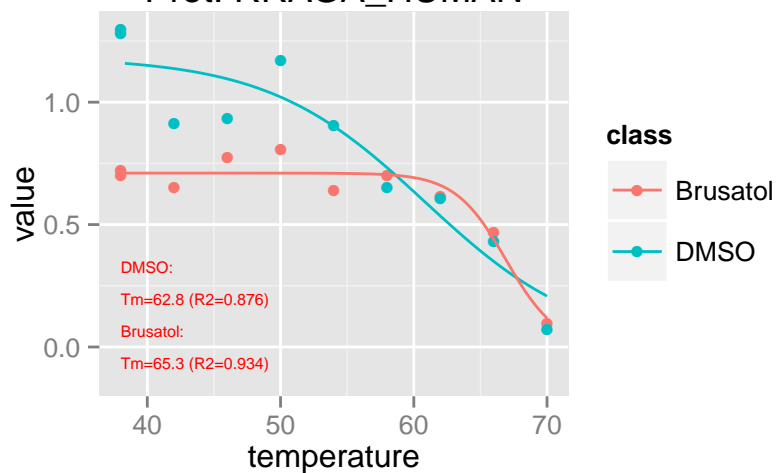

Prot: RRAS\_HUMAN

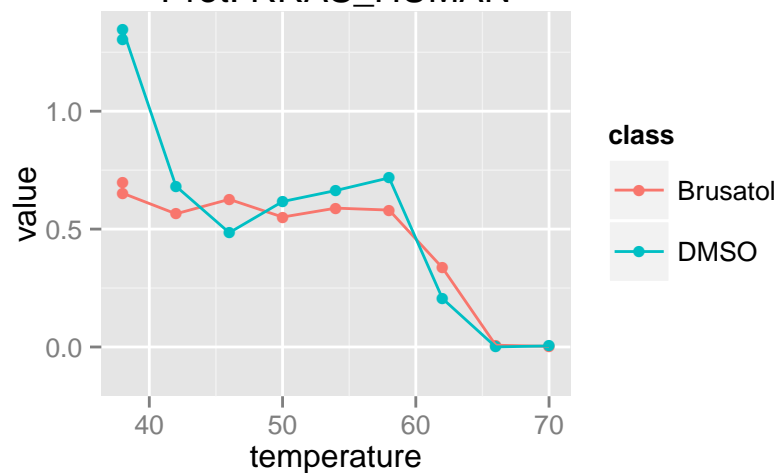

Prot: RRAS2\_HUMAN

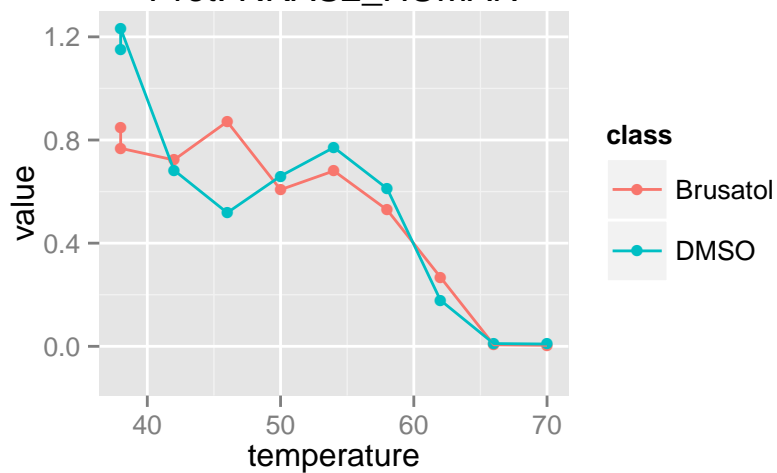

Prot: RRBP1\_HUMAN

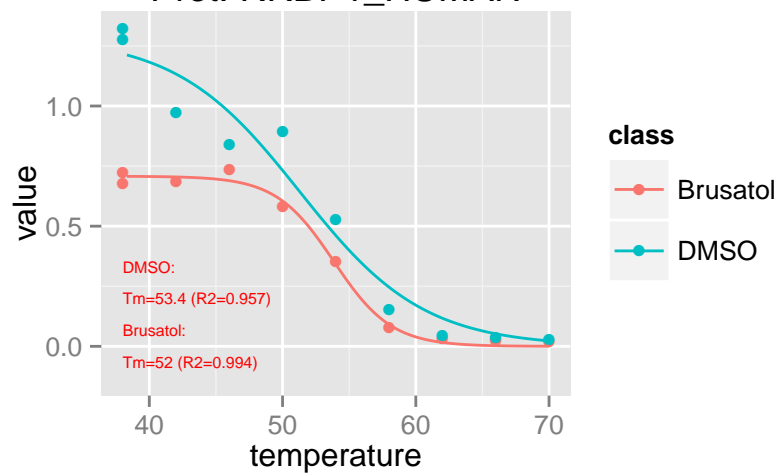

Prot: RRFM\_HUMAN

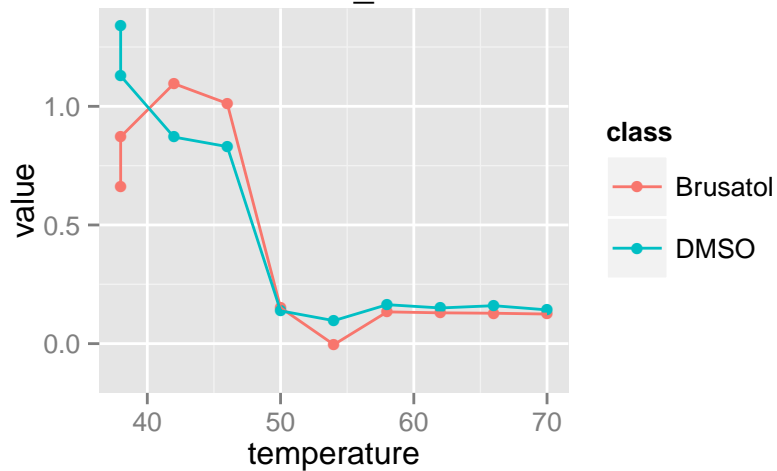

Prot: RRMJ1\_HUMAN

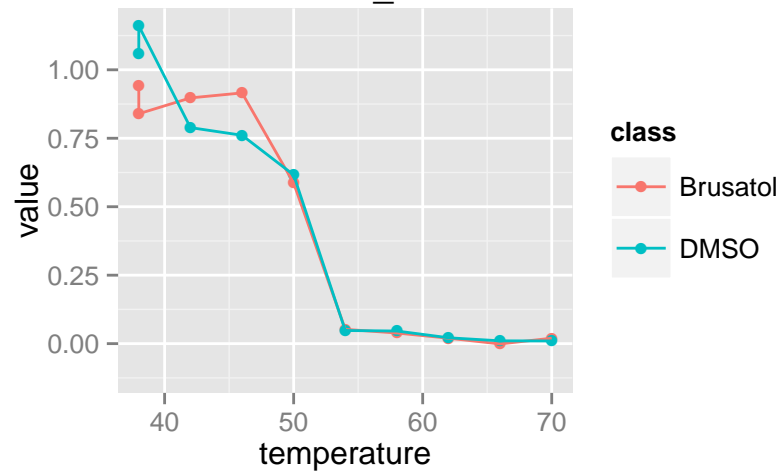

Prot: RRP12\_HUMAN

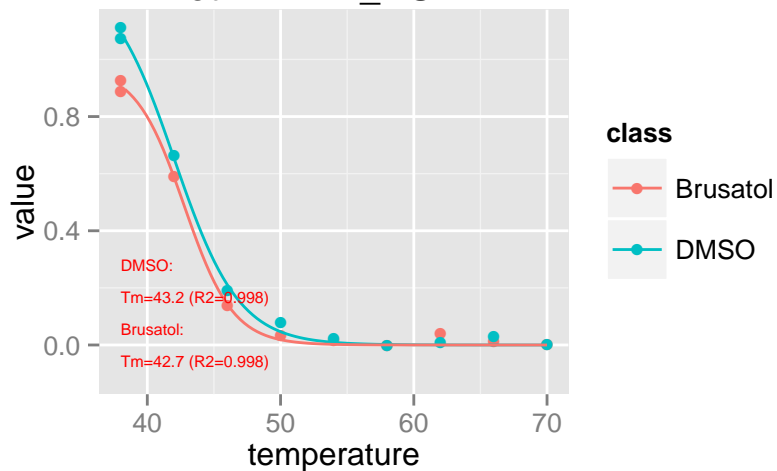

Prot: RRP15\_HUMAN

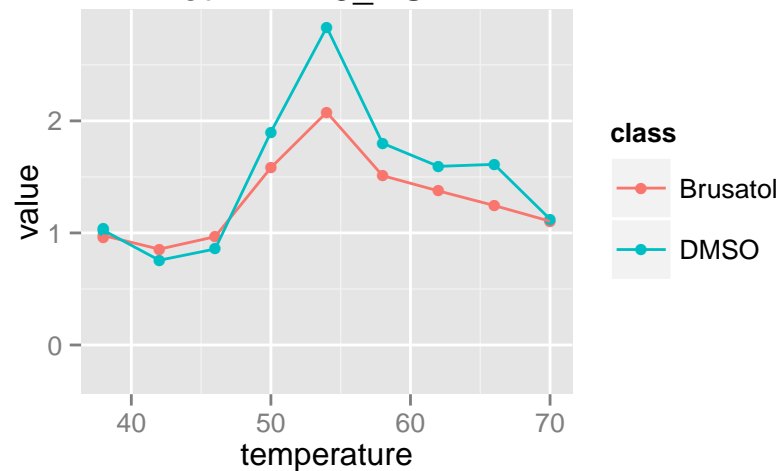

Prot: RRP44\_HUMAN

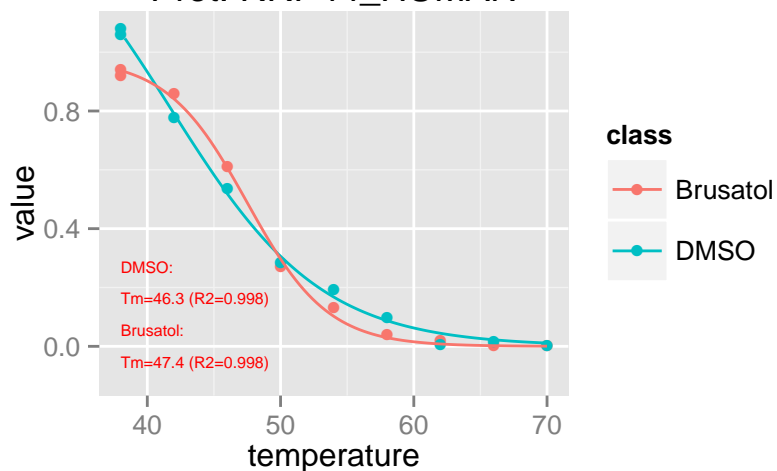

Prot: RS10\_HUMAN

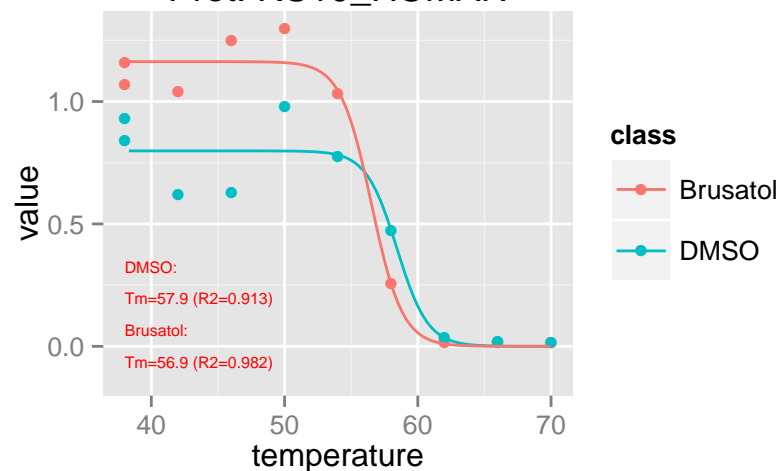

Prot: RS10L\_HUMAN

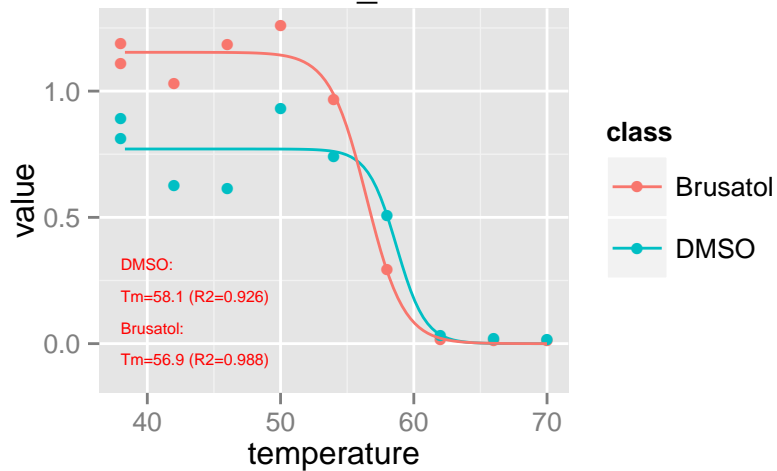

Prot: RS11\_HUMAN

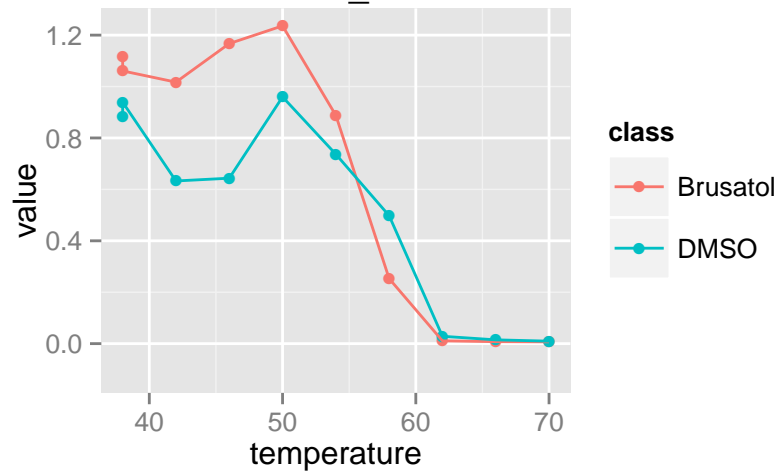

Prot: RS12\_HUMAN

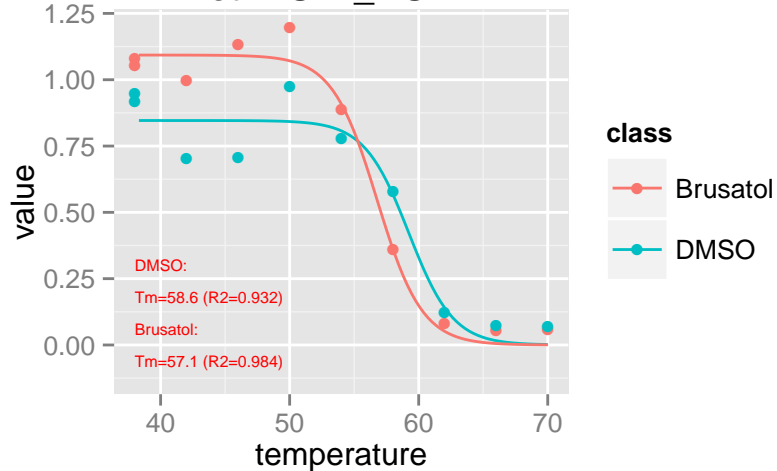

Prot: RS13\_HUMAN

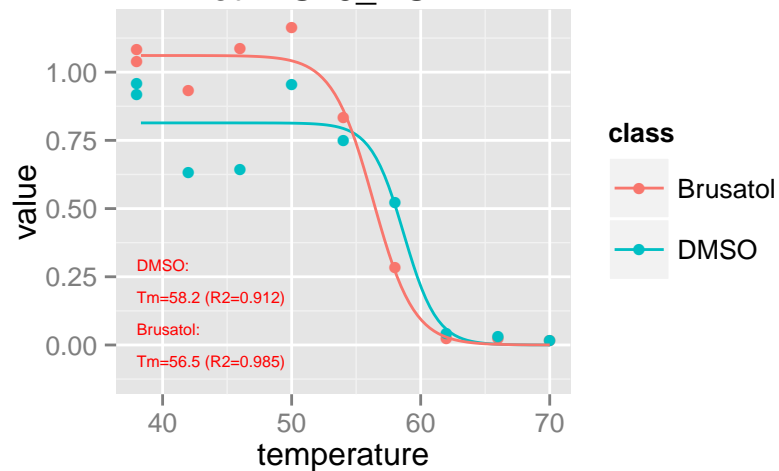

Prot: RS14\_HUMAN

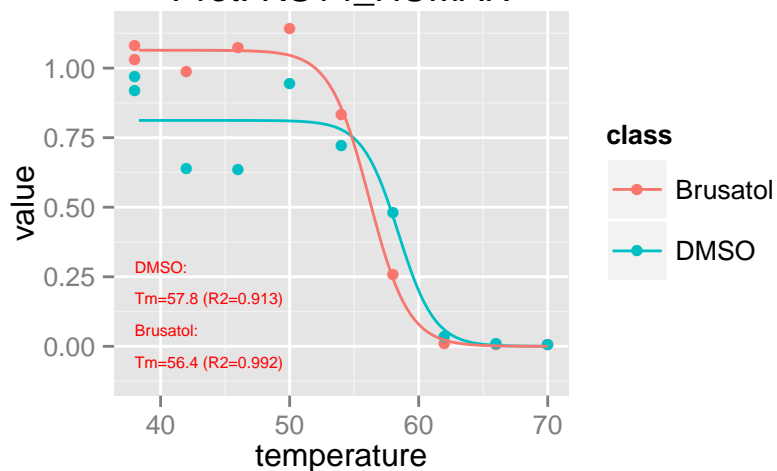

Prot: RS15\_HUMAN

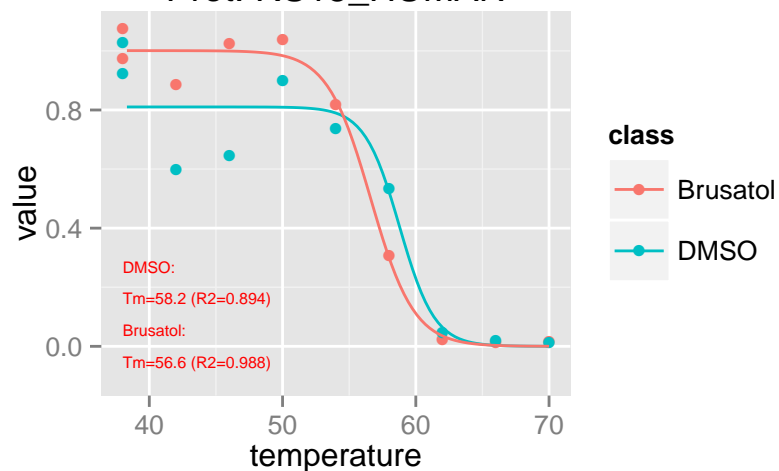

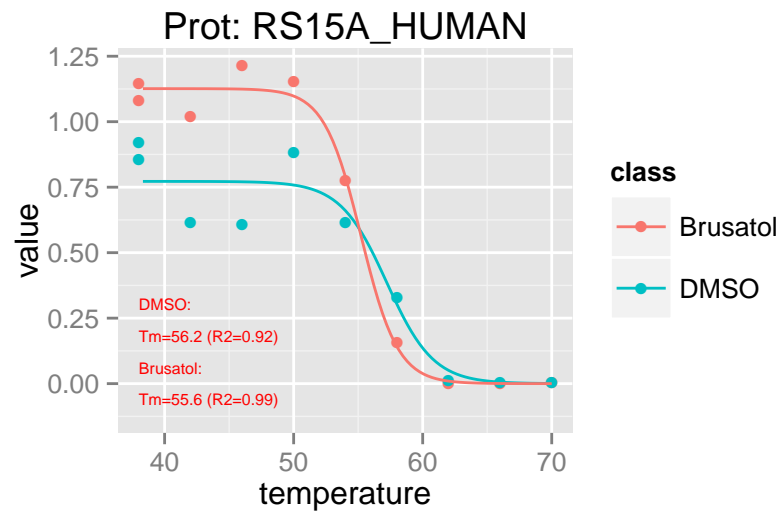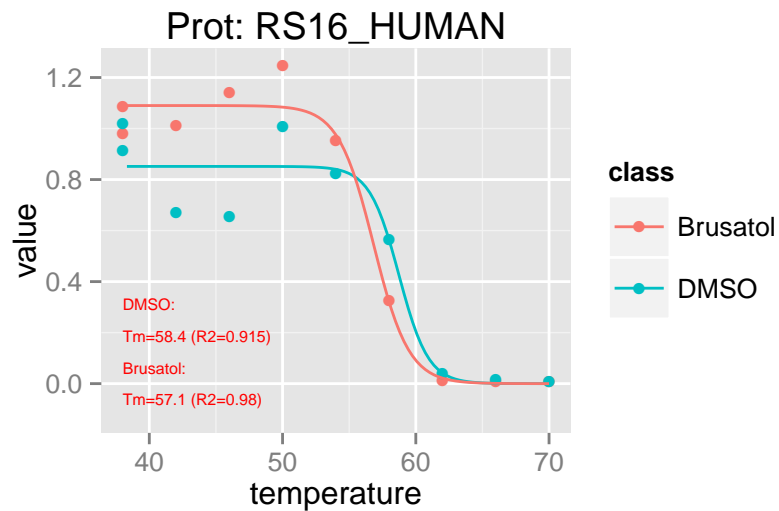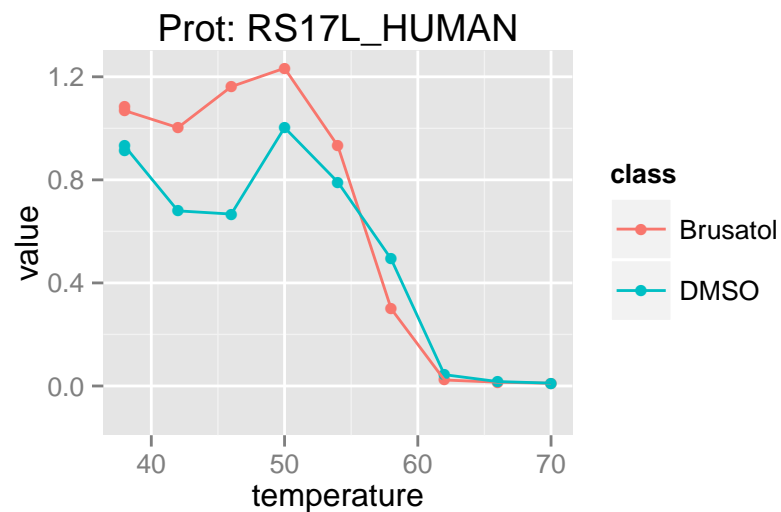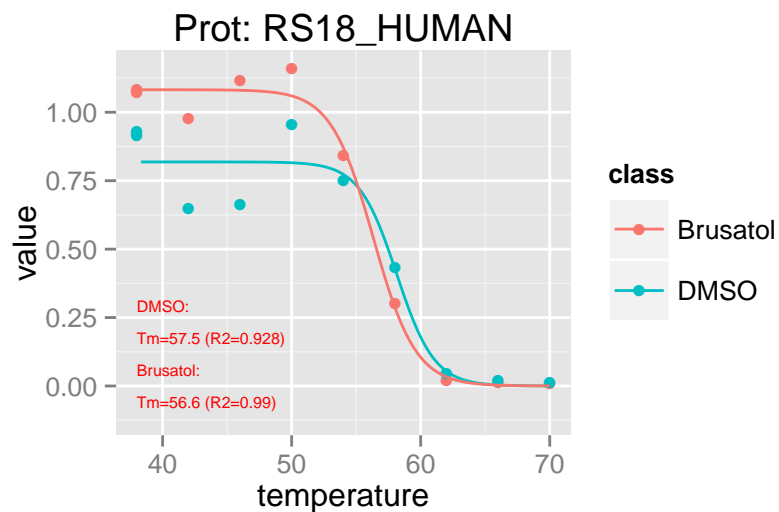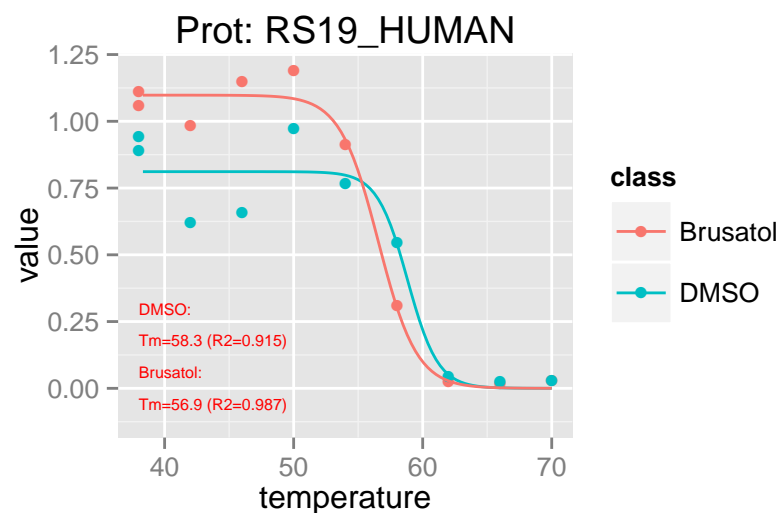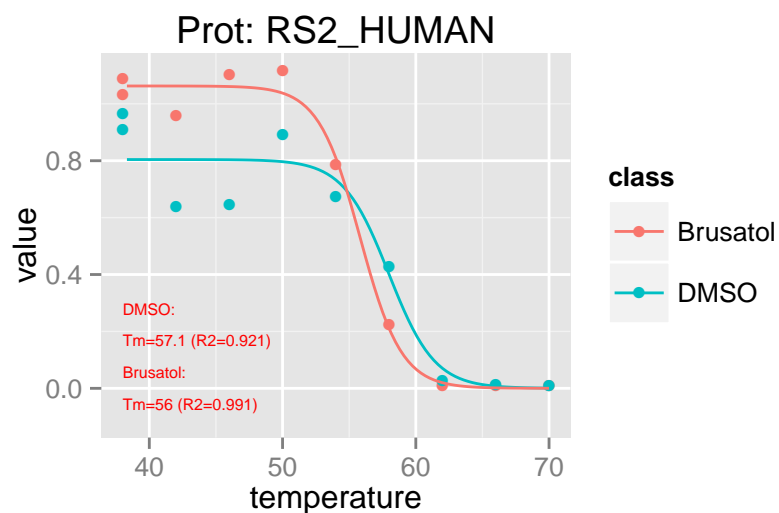

Prot: RS20\_HUMAN

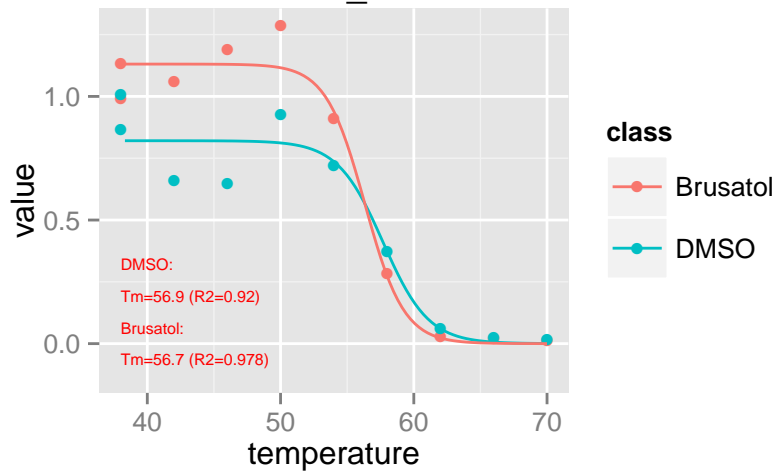

Prot: RS21\_HUMAN

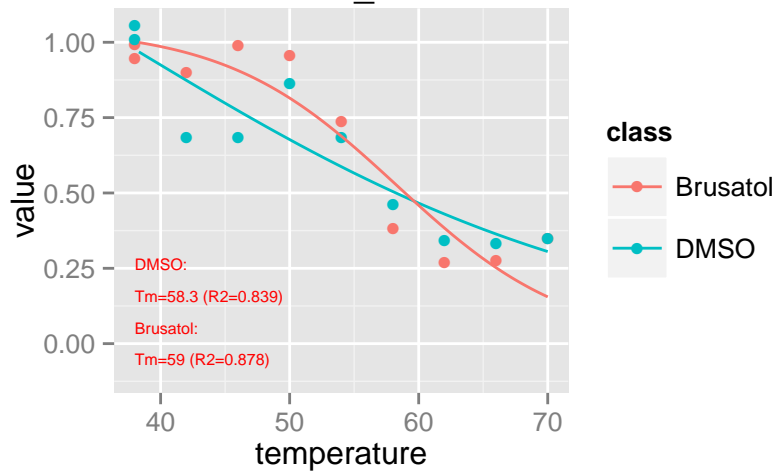

Prot: RS23\_HUMAN

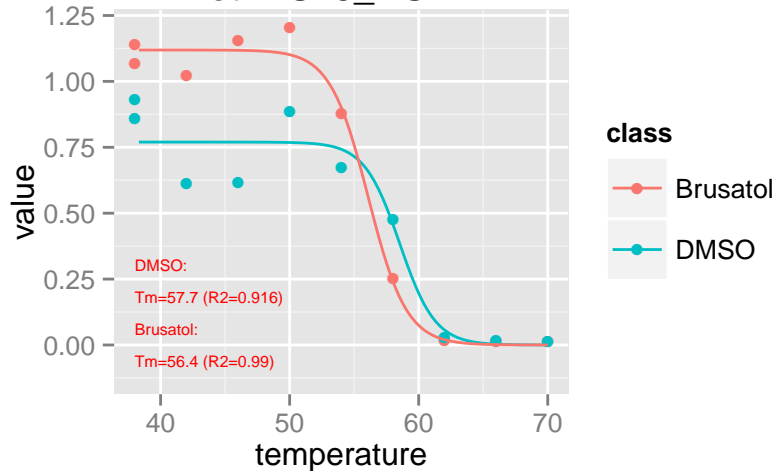

Prot: RS24\_HUMAN

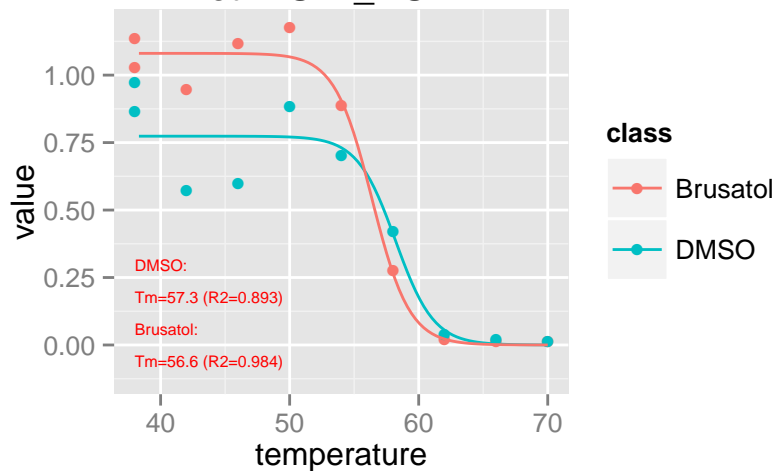

Prot: RS25\_HUMAN

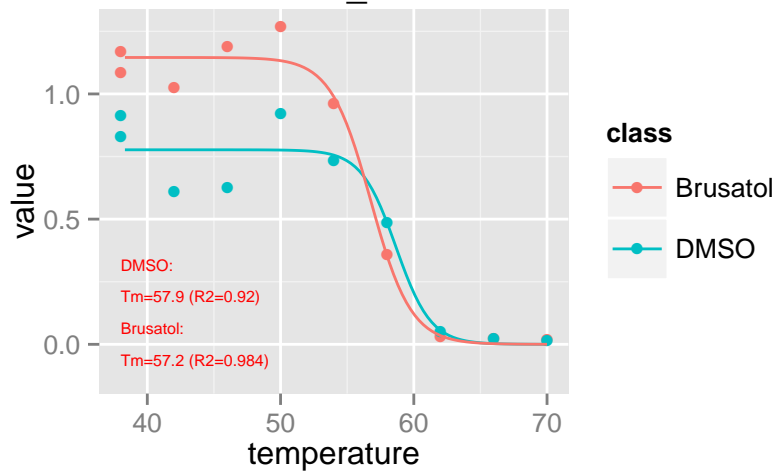

Prot: RS26\_HUMAN

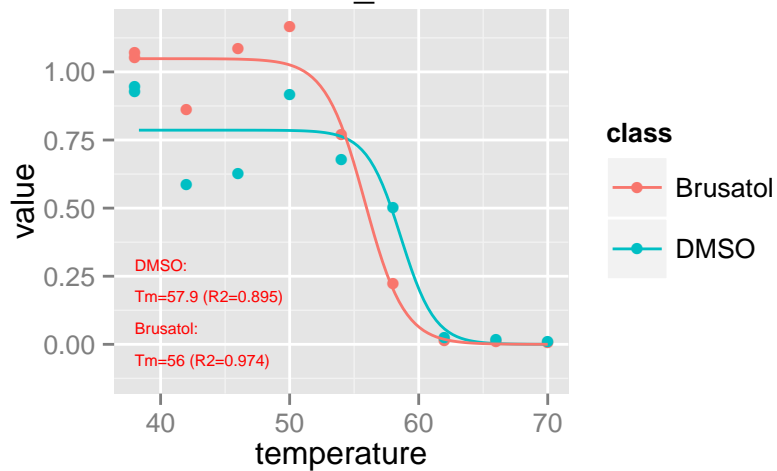

Prot: RS26L\_HUMAN

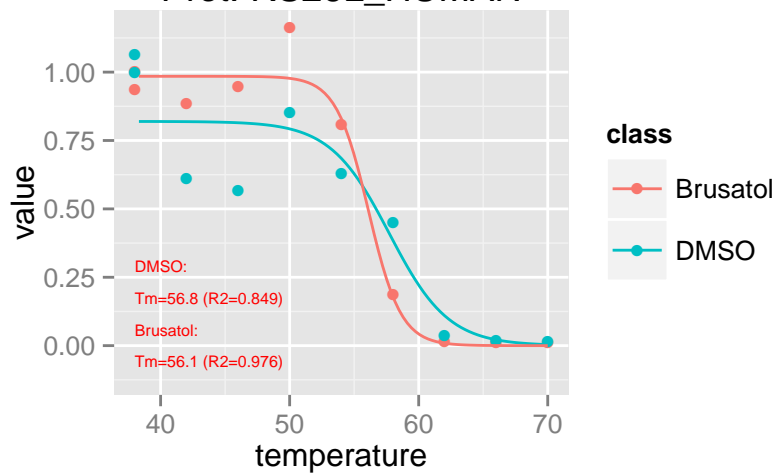

Prot: RS27A\_HUMAN

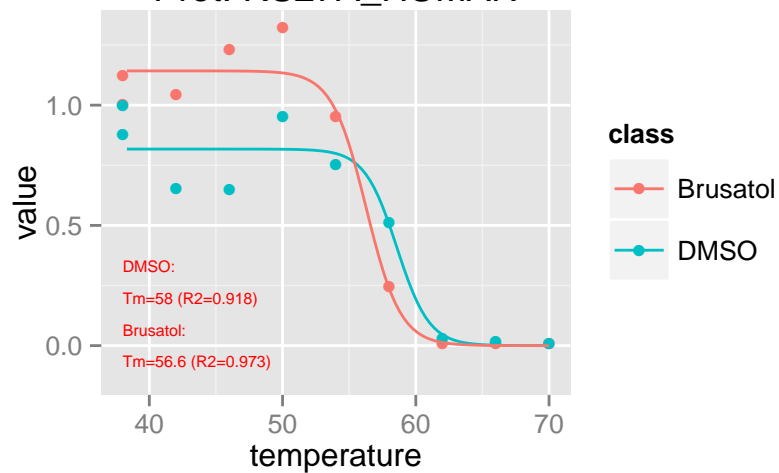

Prot: RS27L\_HUMAN

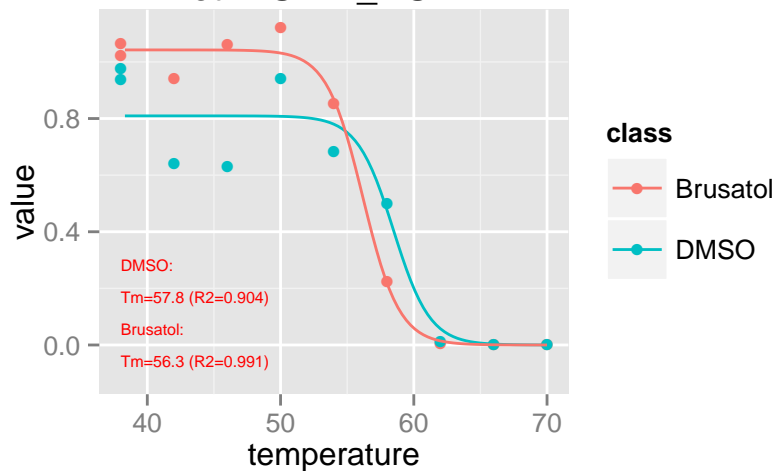

Prot: RS28\_HUMAN

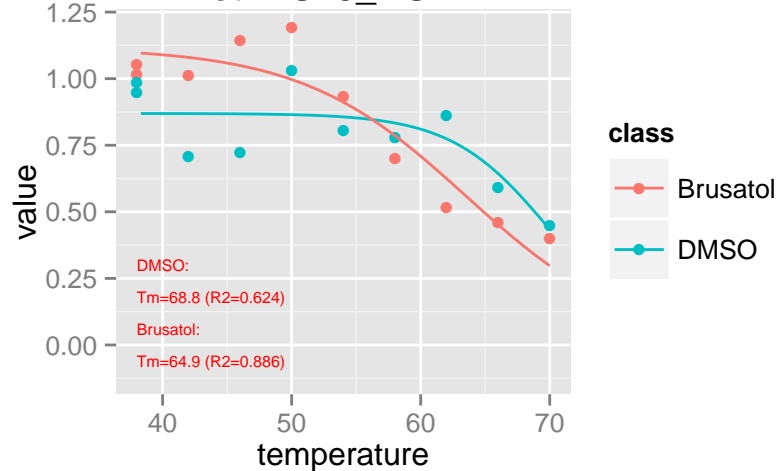

Prot: RS29\_HUMAN

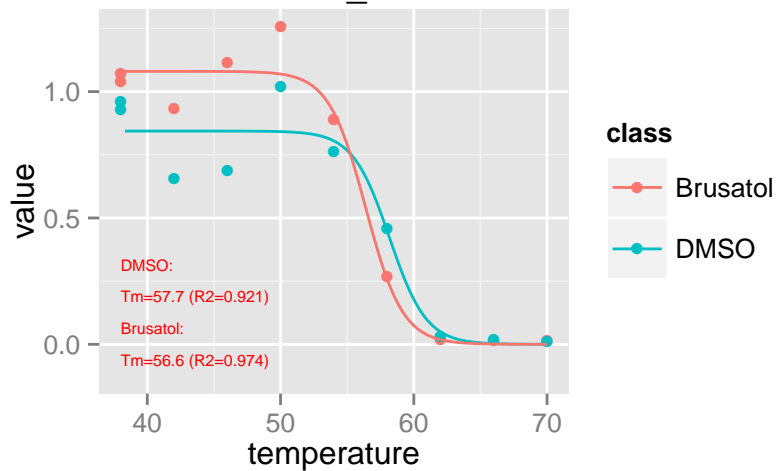

Prot: RS3\_HUMAN

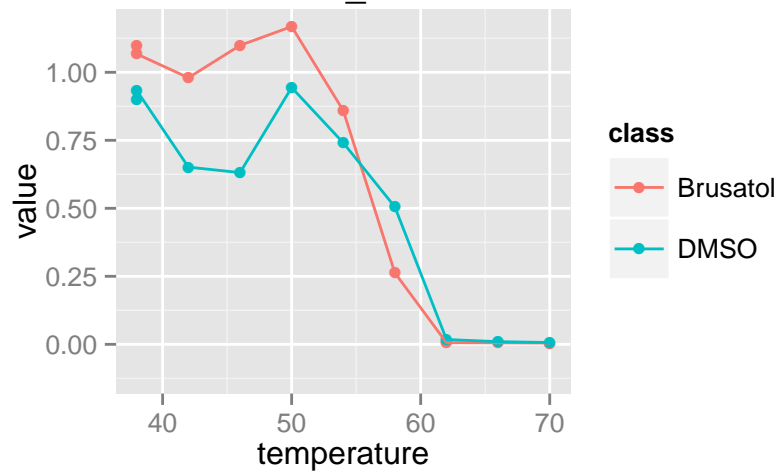

Prot: RS30\_HUMAN

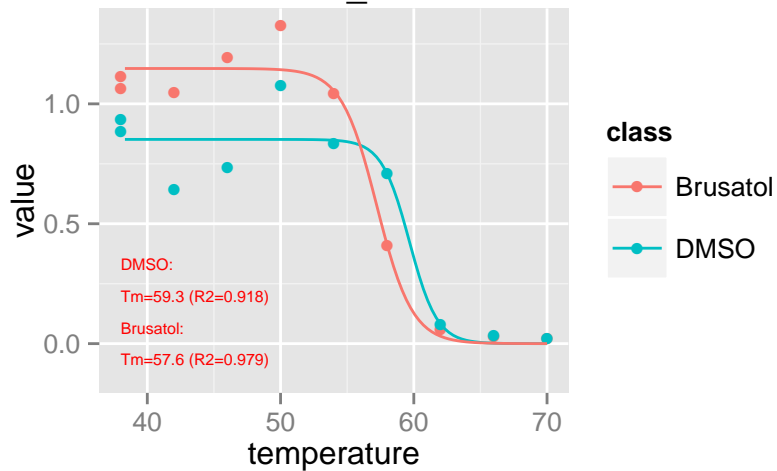

Prot: RS3A\_HUMAN

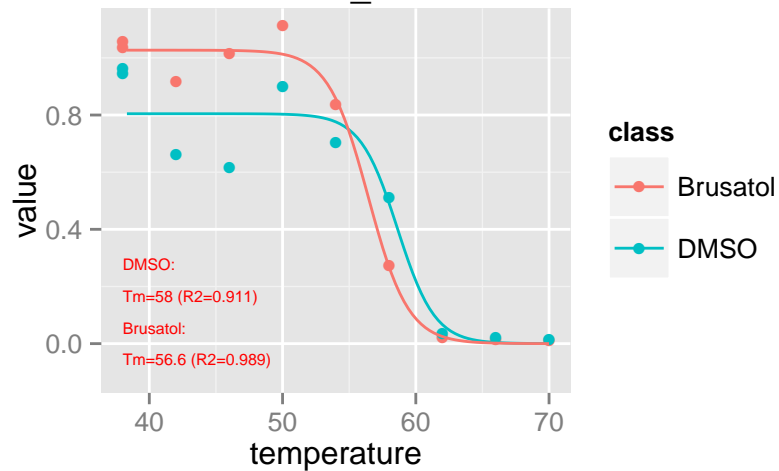

Prot: RS4X\_HUMAN

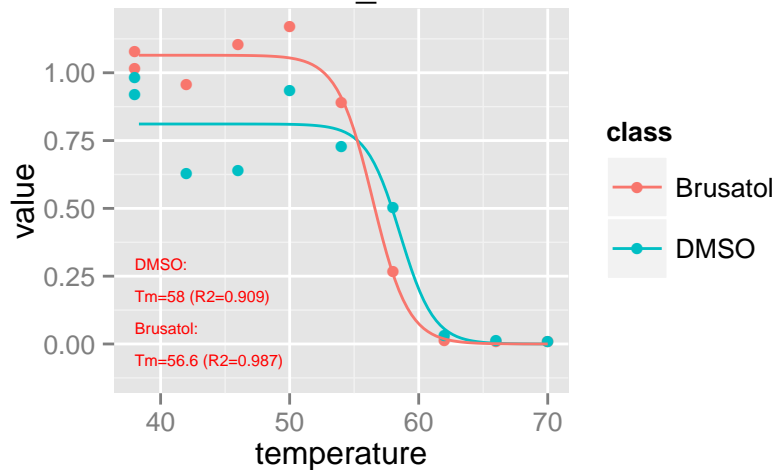

Prot: RS4Y1\_HUMAN

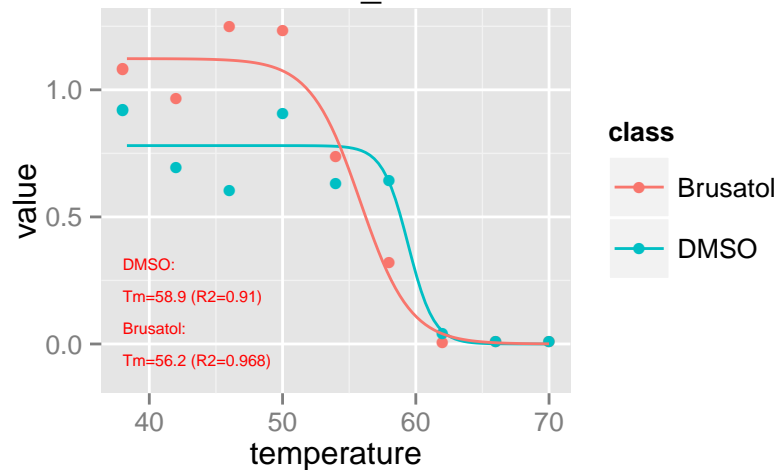

Prot: RS5\_HUMAN

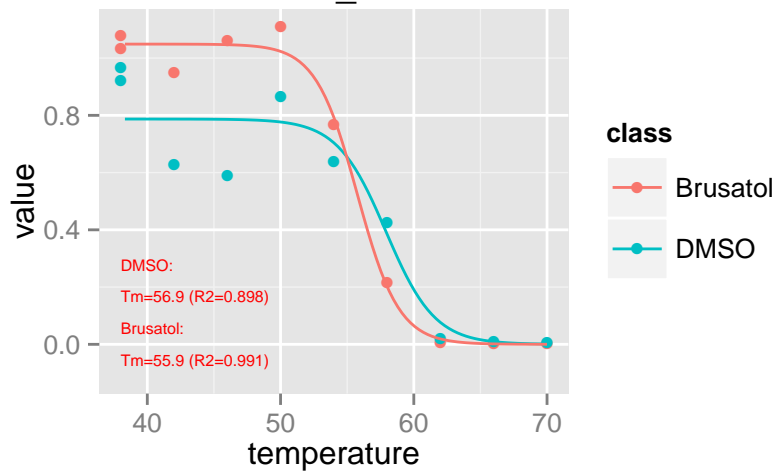

Prot: RS6\_HUMAN

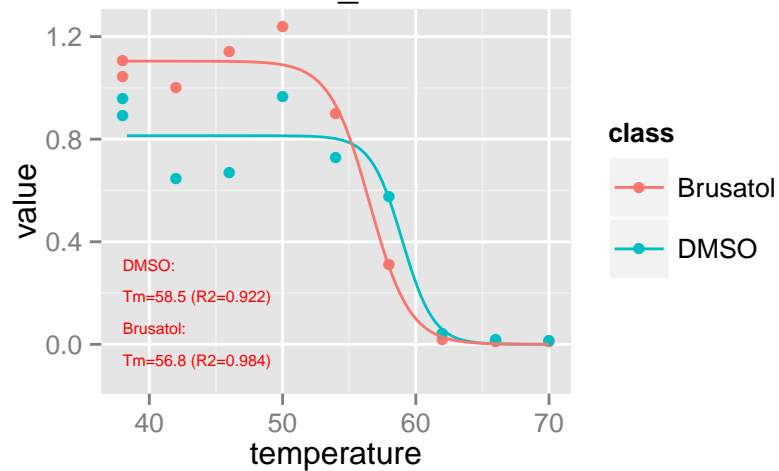



Prot: RS7\_HUMAN

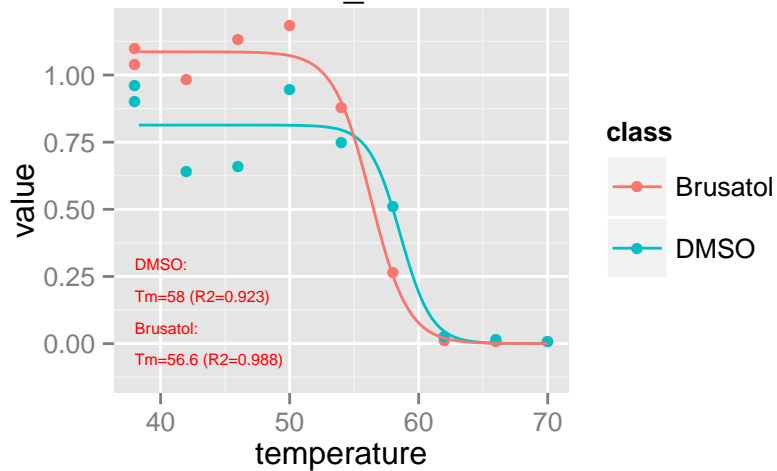

Prot: RS8\_HUMAN

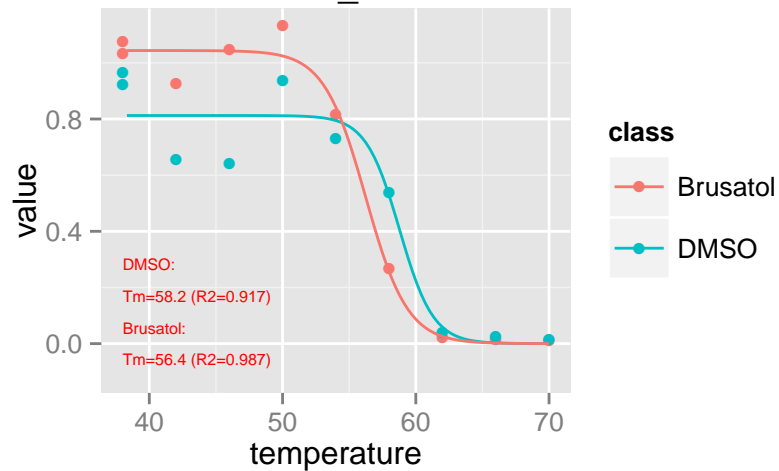

Prot: RS9\_HUMAN

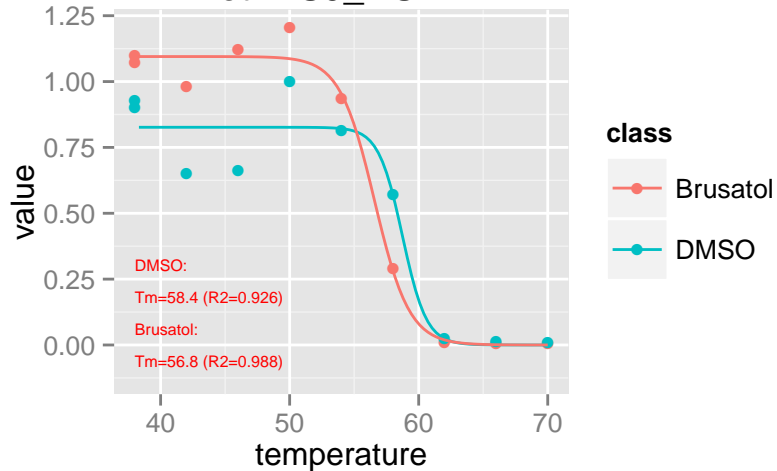

Prot: RSMB\_HUMAN

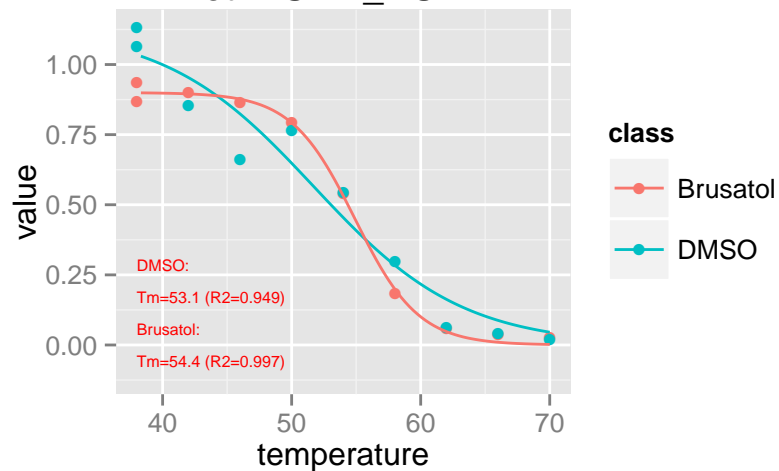

Prot: RSSA\_HUMAN

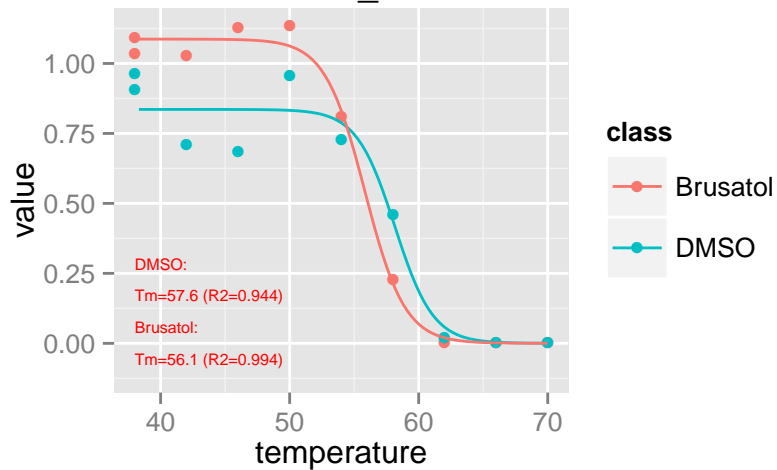

Prot: RSU1\_HUMAN

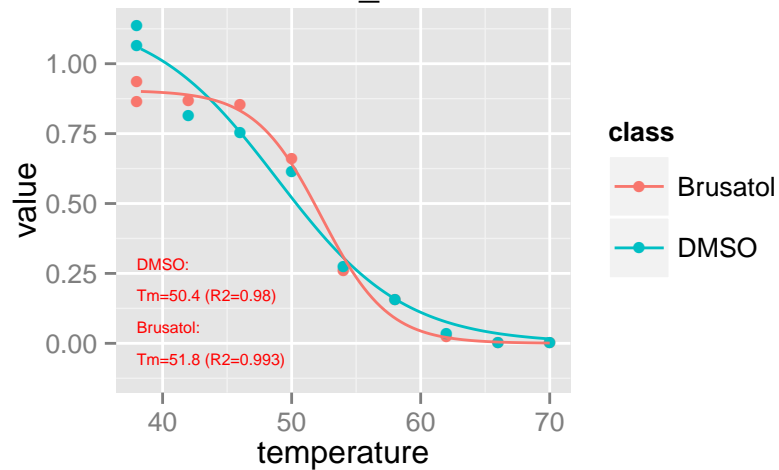

Prot: RT02\_HUMAN

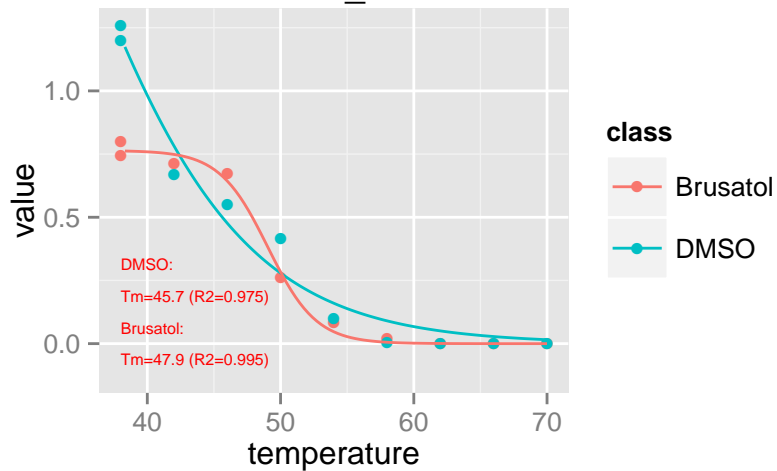

Prot: RT05\_HUMAN

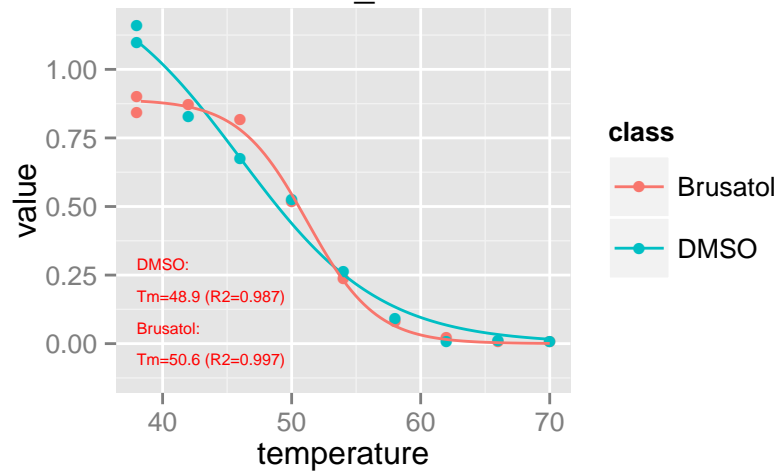

Prot: RT07\_HUMAN

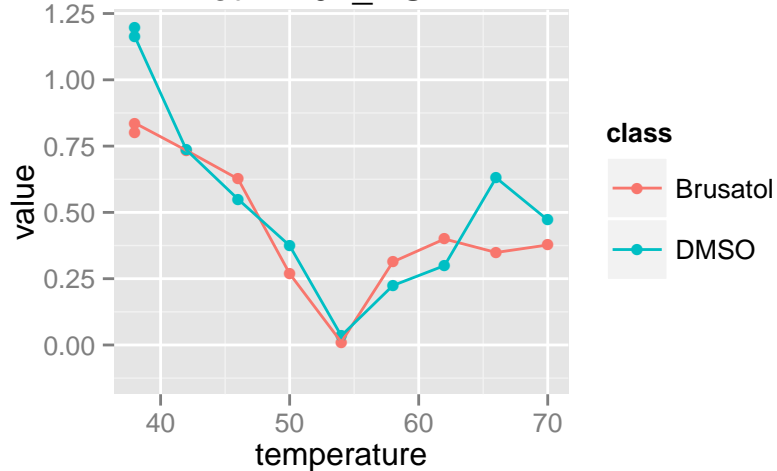

Prot: RT09\_HUMAN

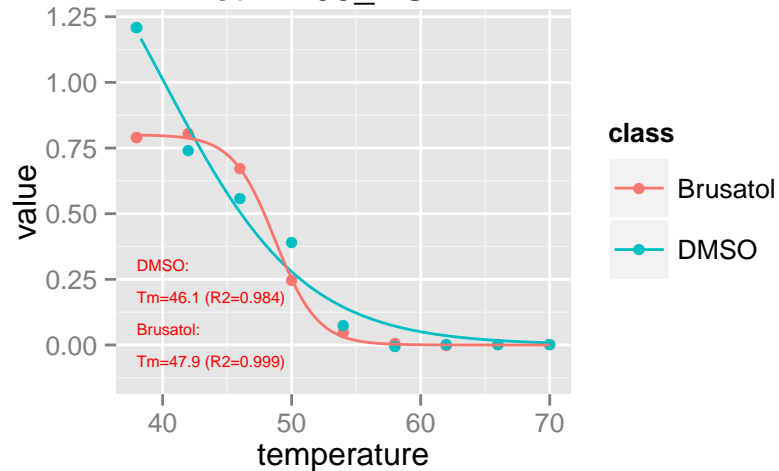

Prot: RT11\_HUMAN

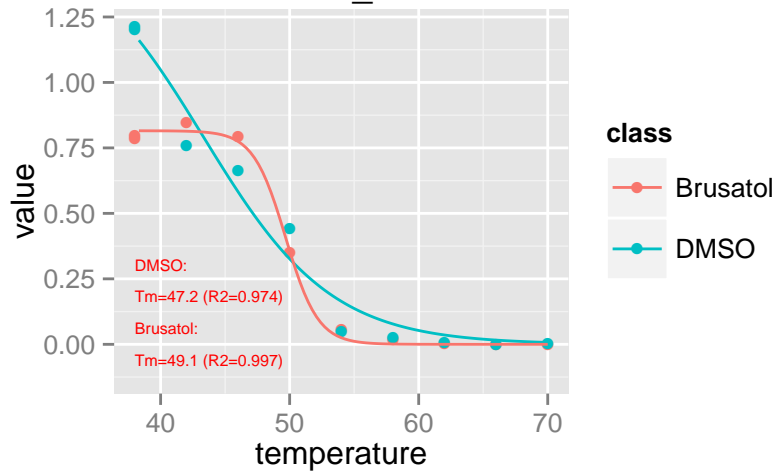

Prot: RT12\_HUMAN

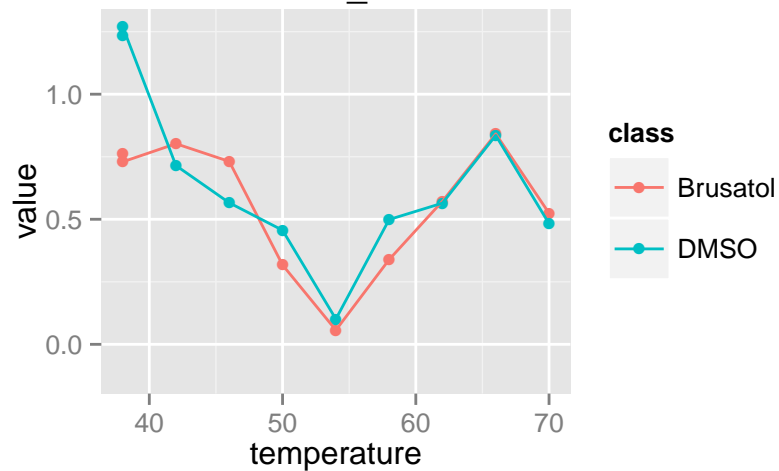

Prot: RT15\_HUMAN

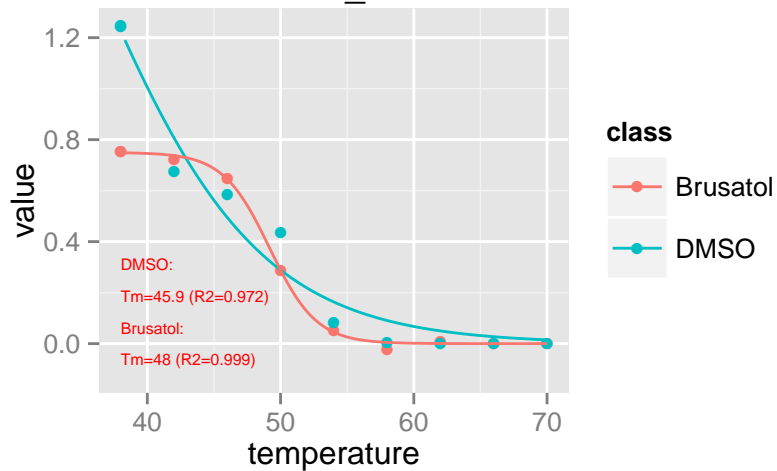

Prot: RT16\_HUMAN

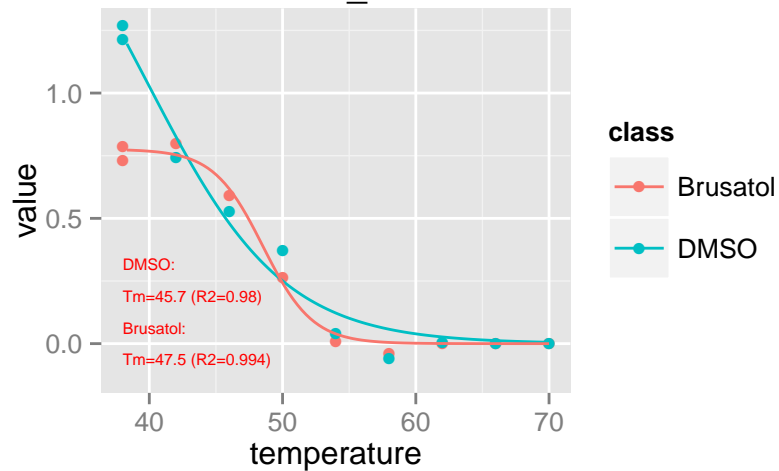

Prot: RT17\_HUMAN

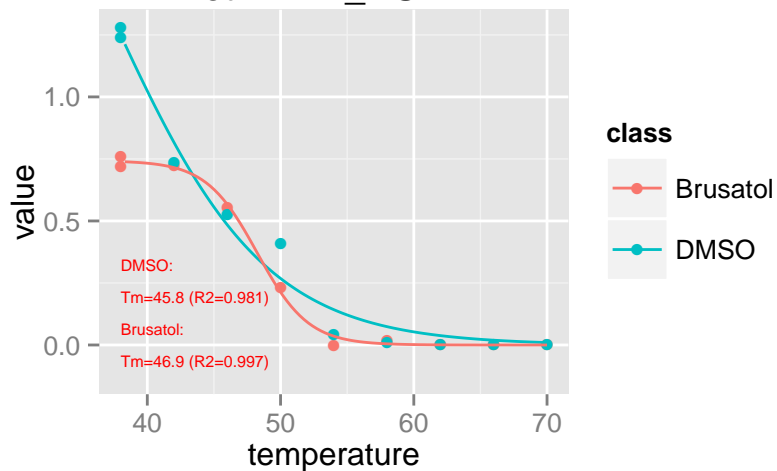

Prot: RT18B\_HUMAN

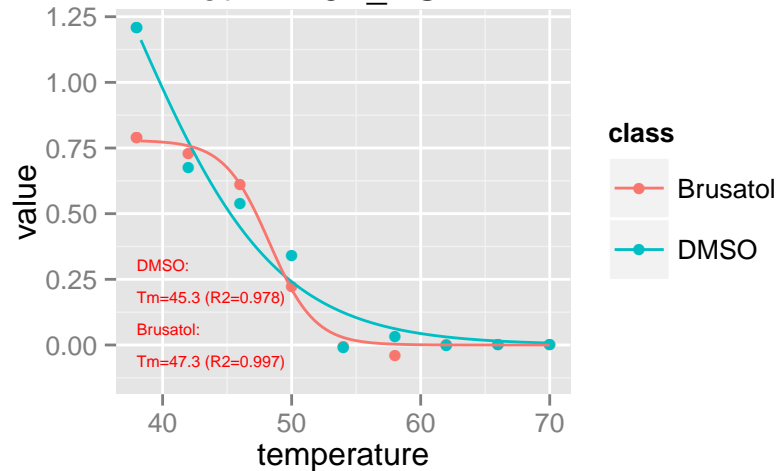

Prot: RT22\_HUMAN

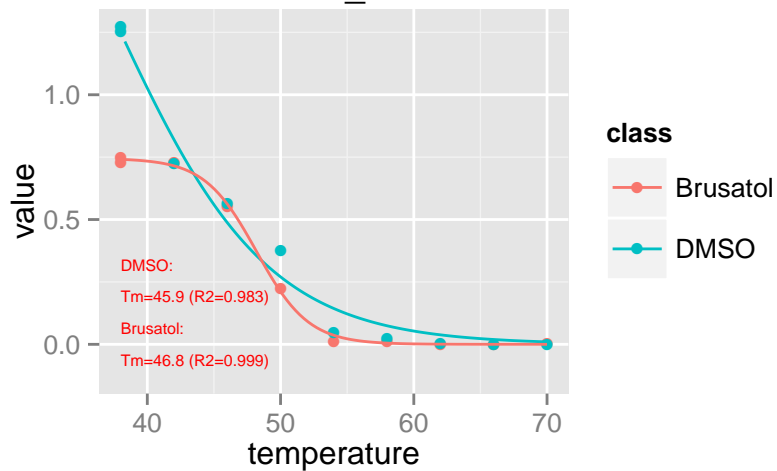

Prot: RT23\_HUMAN

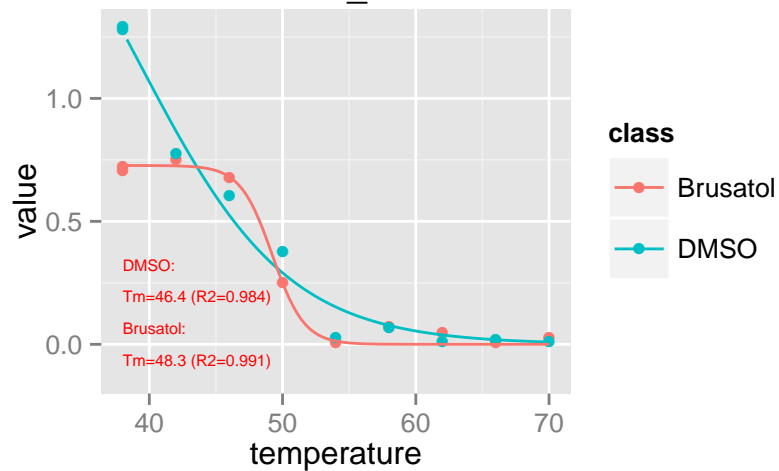

Prot: RT27\_HUMAN

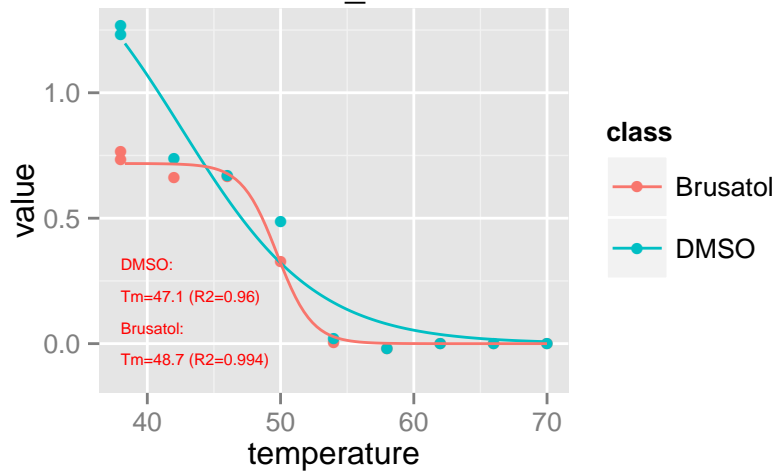

Prot: RT28\_HUMAN

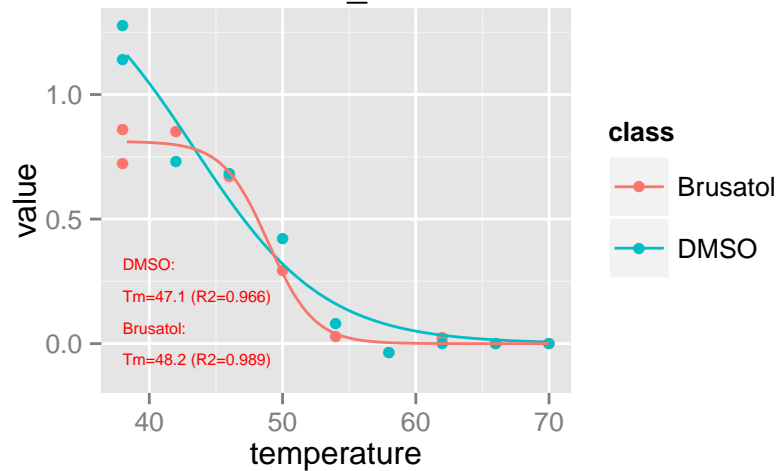

Prot: RT29\_HUMAN

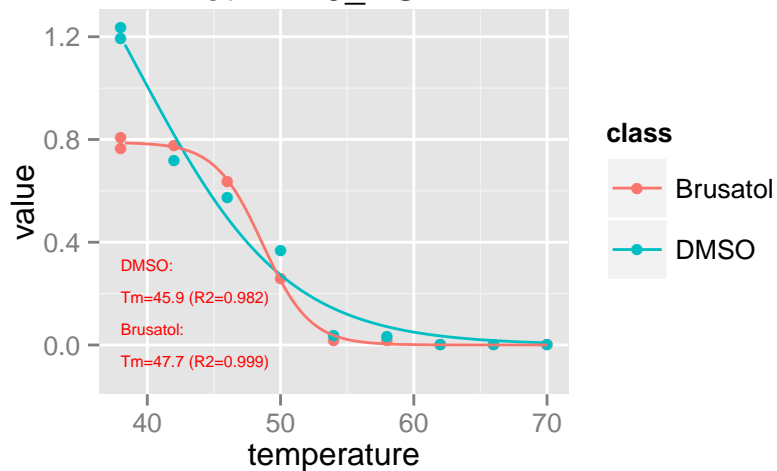

Prot: RT31\_HUMAN

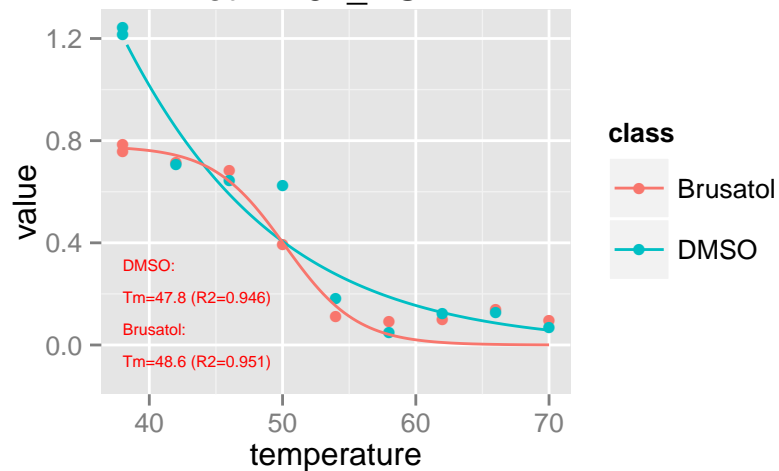

Prot: RT34\_HUMAN

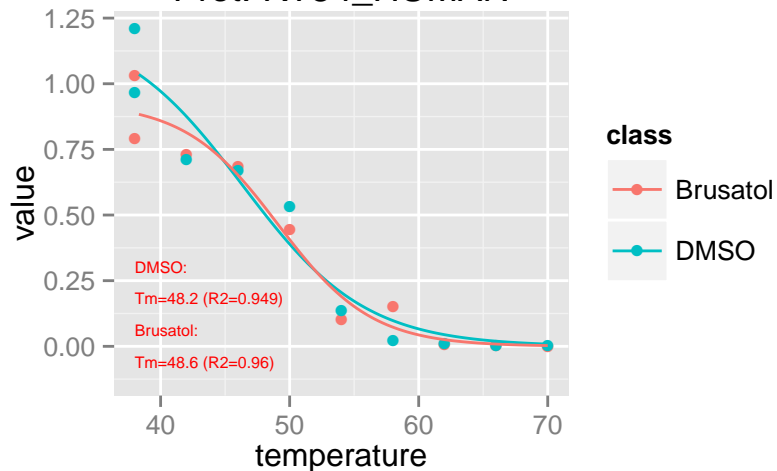

Prot: RT35\_HUMAN

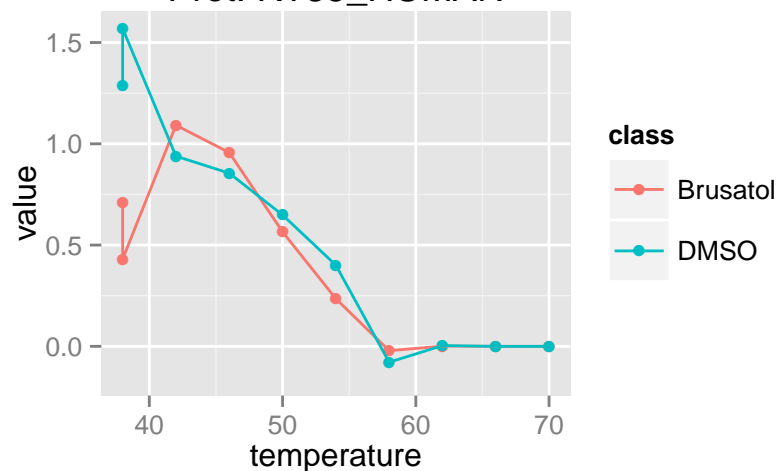

Prot: RT36\_HUMAN

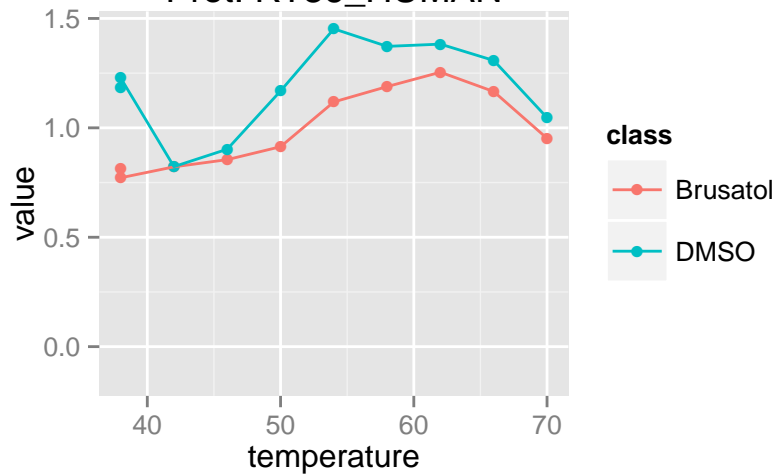

Prot: RTC1\_HUMAN

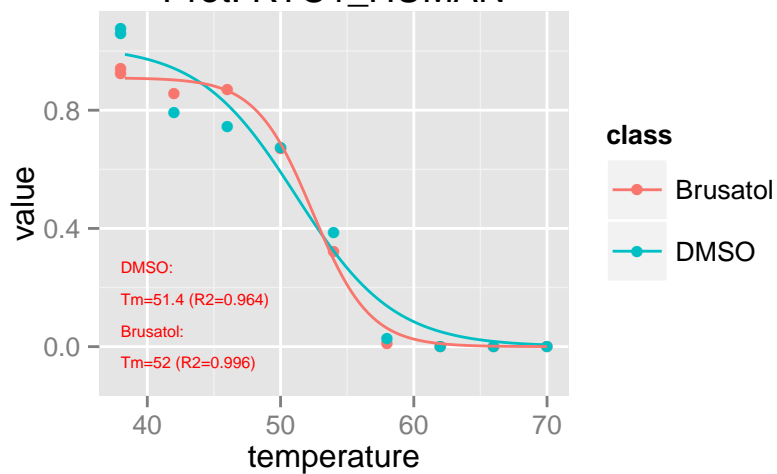

Prot: RTCB\_HUMAN

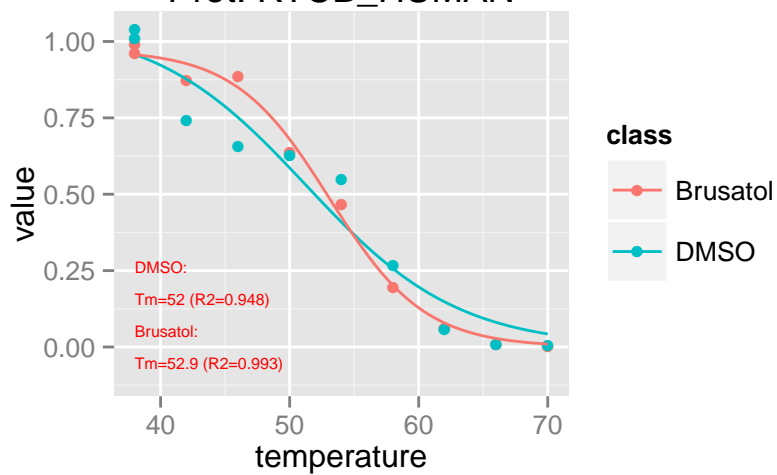

Prot: RTF1\_HUMAN

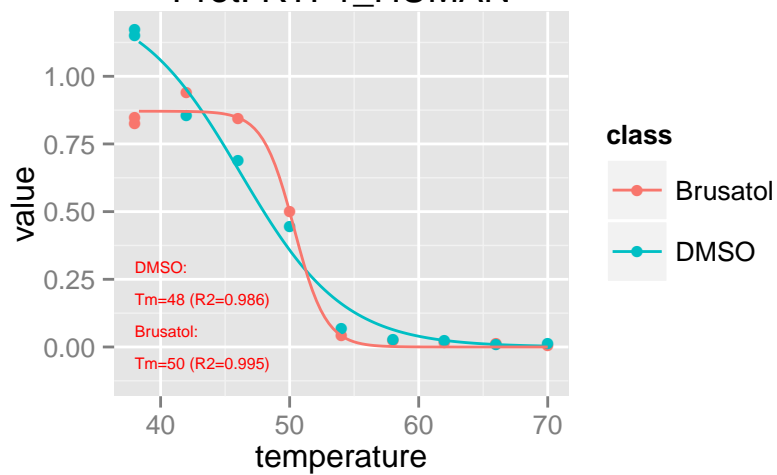

Prot: RTN3\_HUMAN

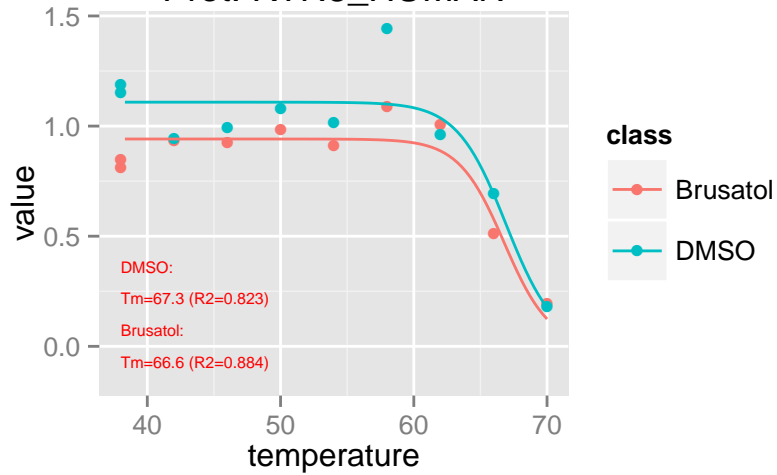

Prot: RTN4\_HUMAN

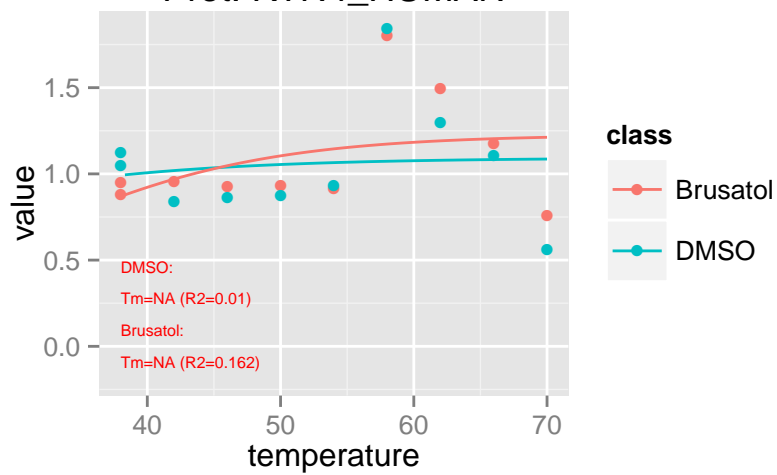

Prot: RU17\_HUMAN

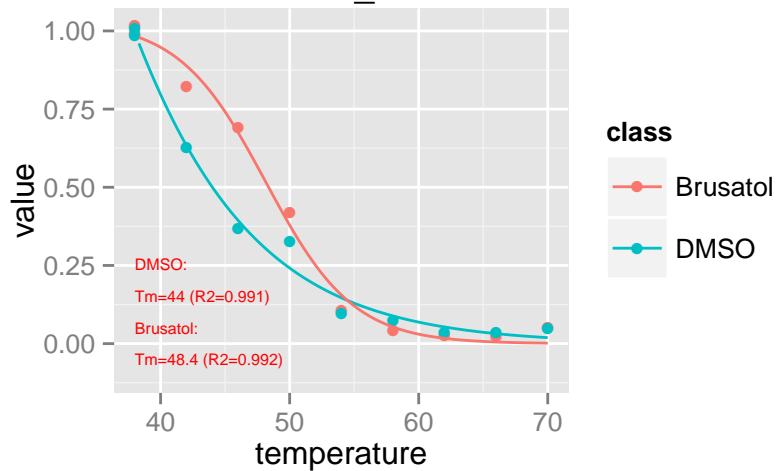

Prot: RU1C\_HUMAN

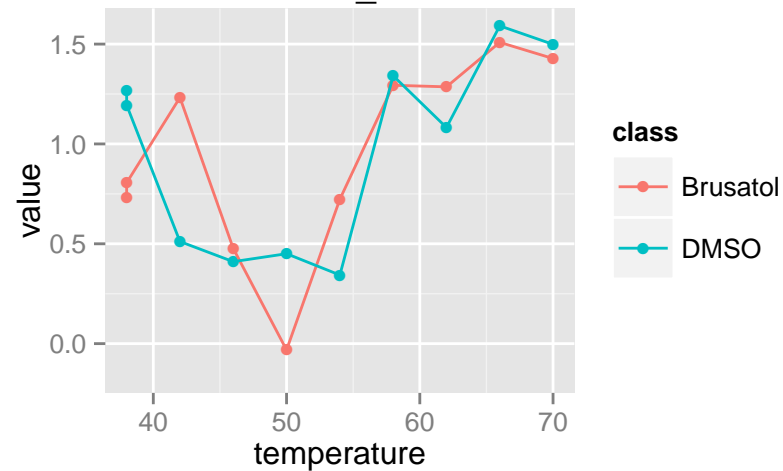

Prot: RU2A\_HUMAN

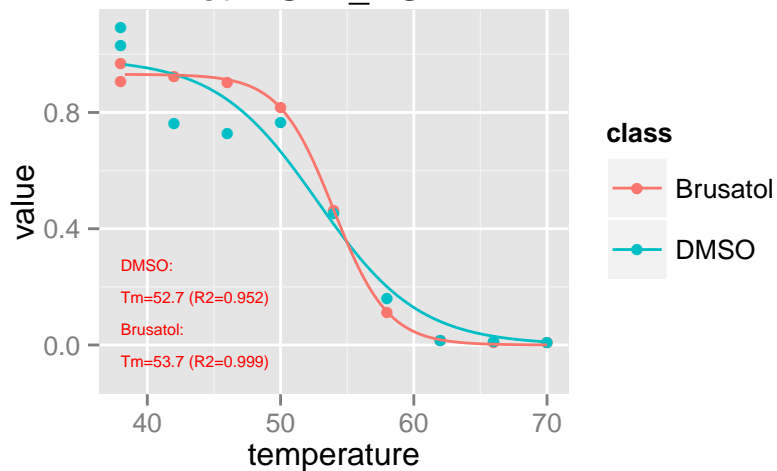

Prot: RU2B\_HUMAN

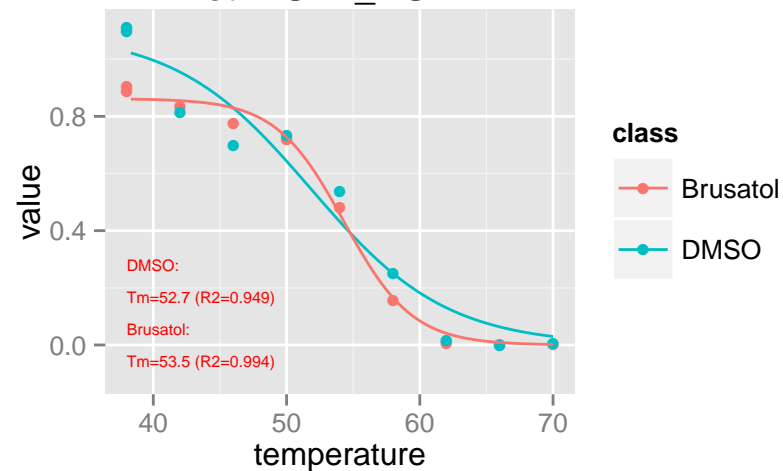

Prot: RUFY1\_HUMAN

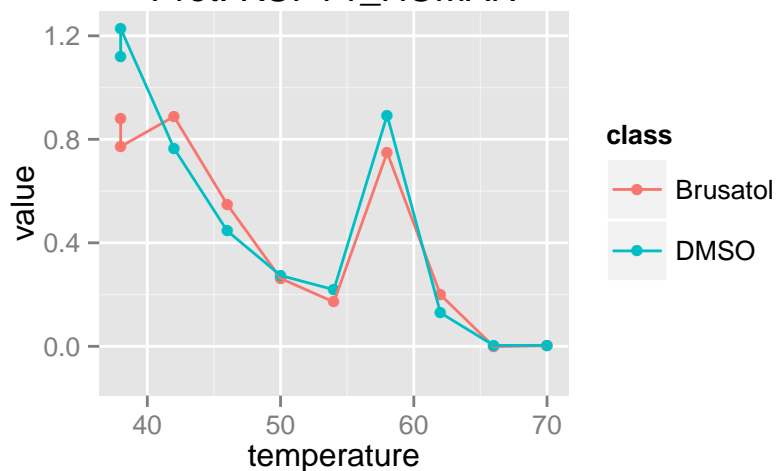

Prot: RUVB1\_HUMAN

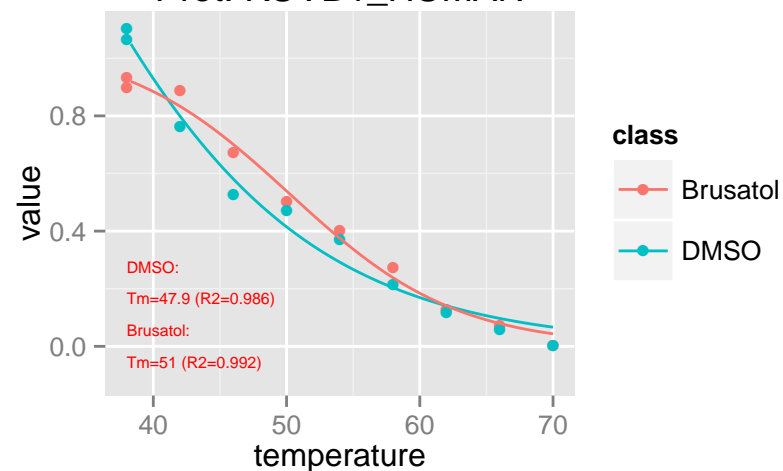

Prot: RUVB2\_HUMAN

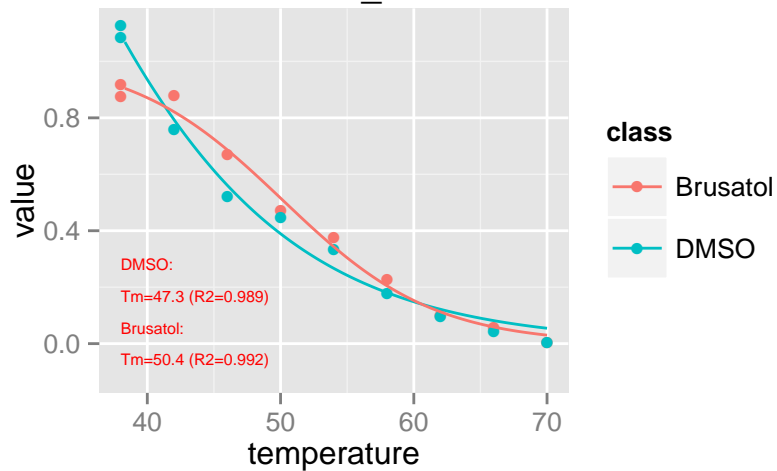

Prot: RUXE\_HUMAN

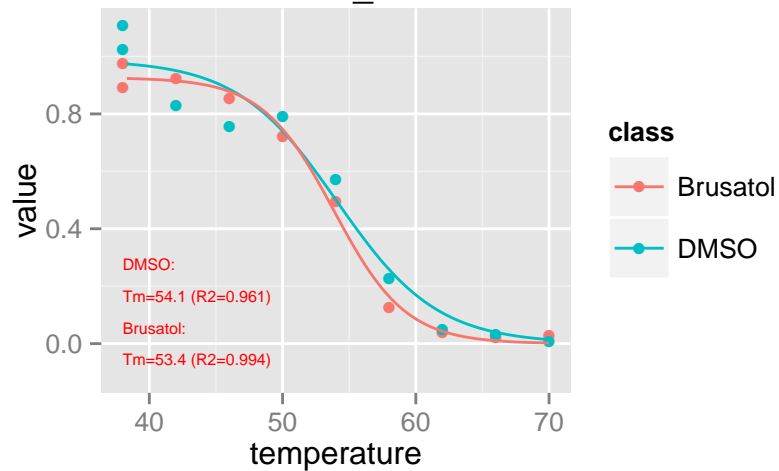

Prot: RUXF\_HUMAN

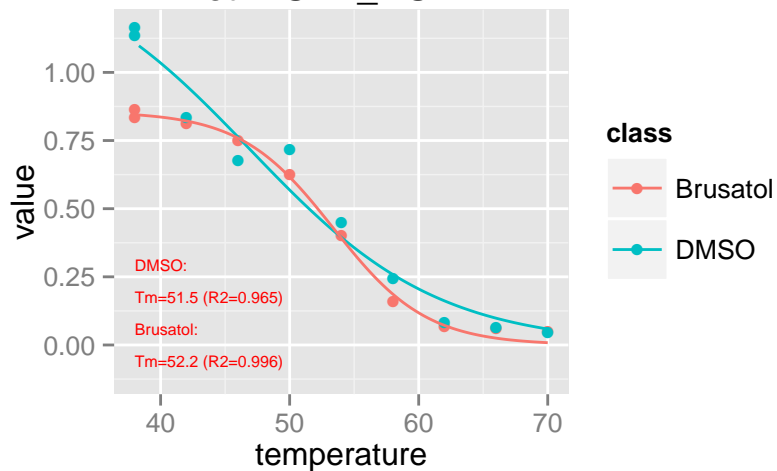

Prot: RUXGL\_HUMAN

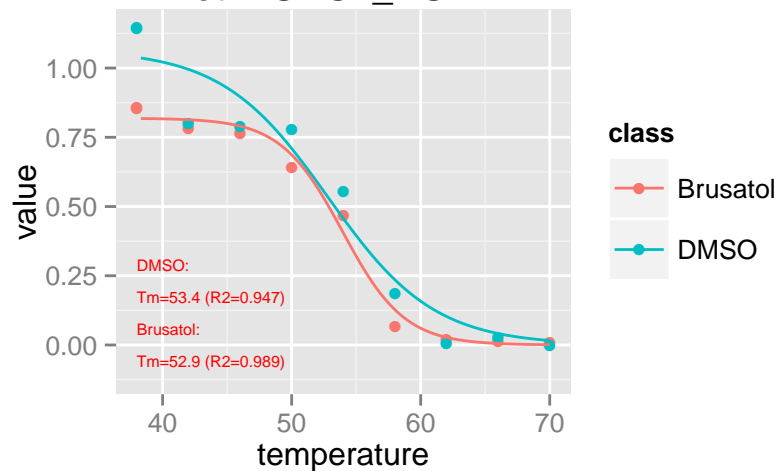

Prot: RXRA\_HUMAN

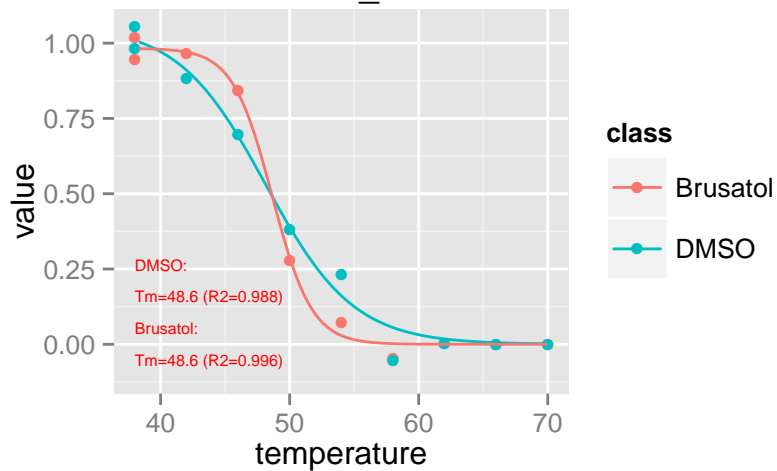

Prot: S100P\_HUMAN

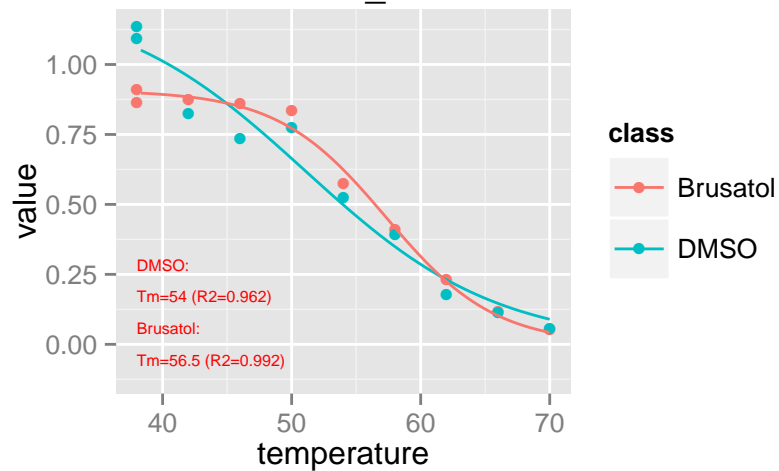

Prot: S10A4\_HUMAN

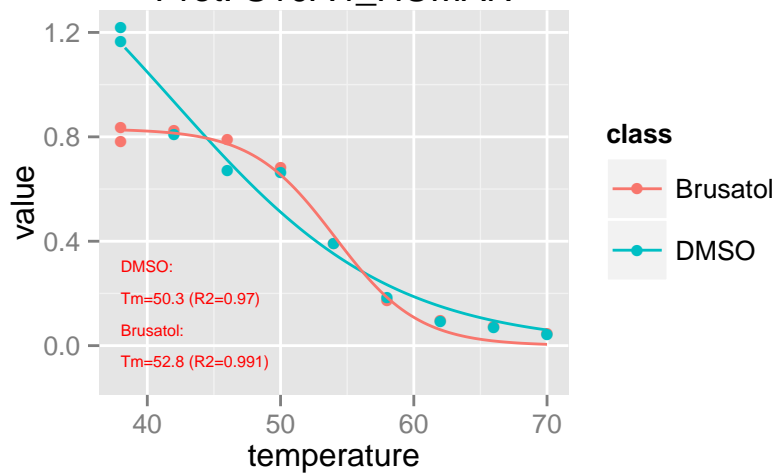

Prot: S10A6\_HUMAN

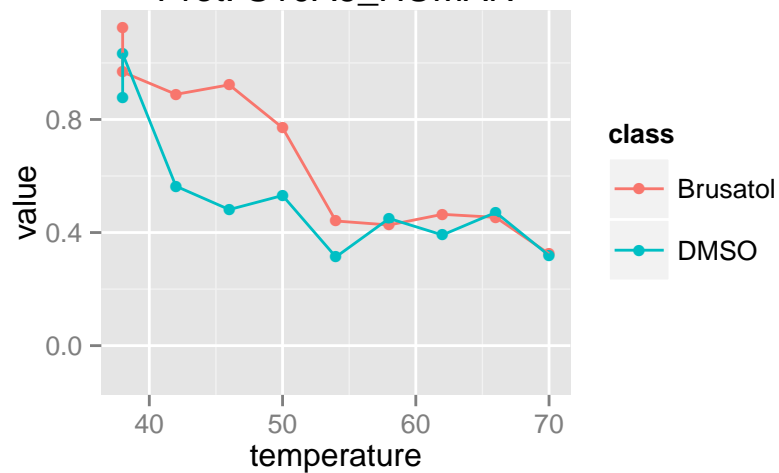

Prot: S10AA\_HUMAN

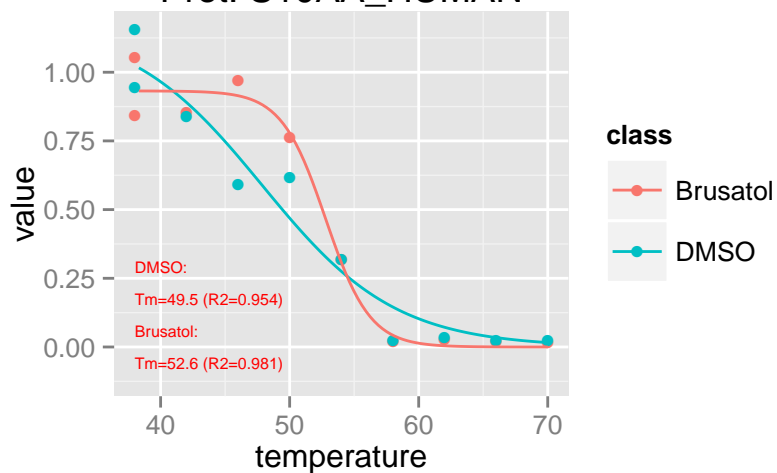

Prot: S10AB\_HUMAN

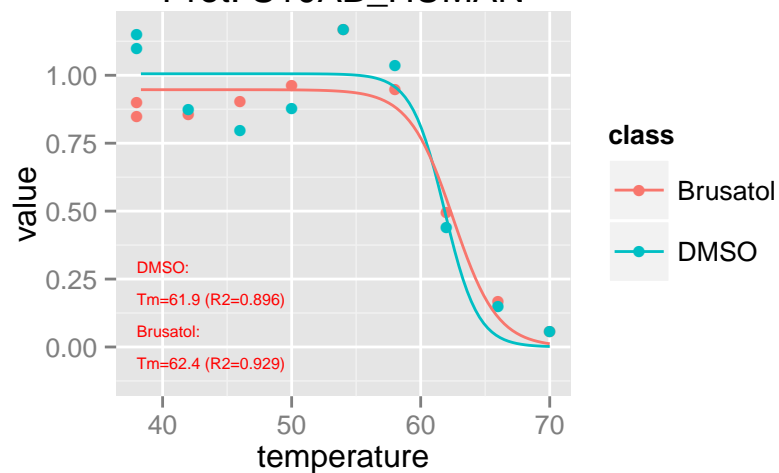

Prot: S10AD\_HUMAN

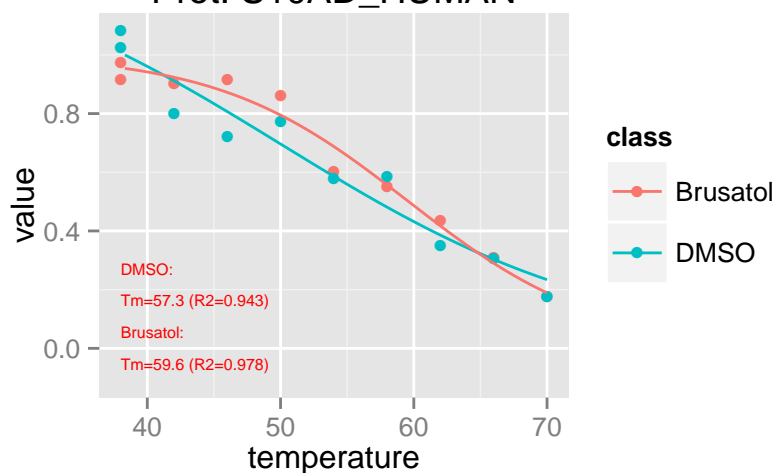

Prot: S12A2\_HUMAN

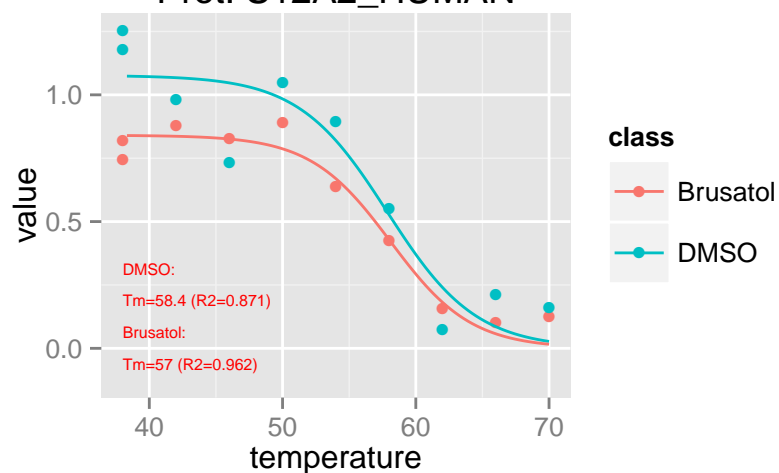



Prot: S14L2\_HUMAN

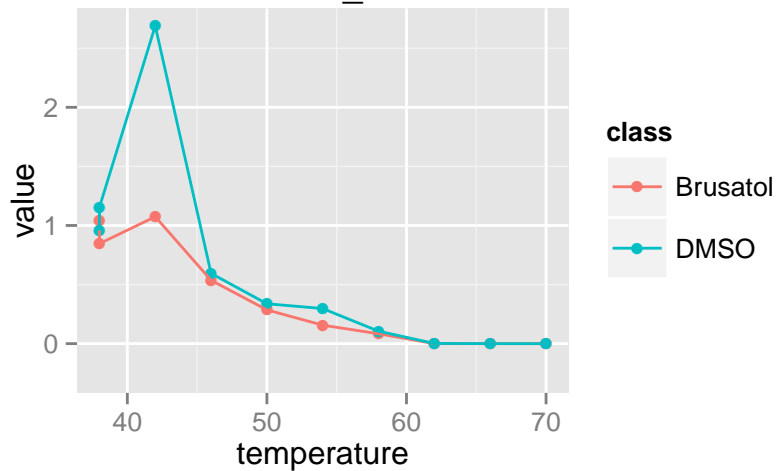

Prot: S23IP\_HUMAN

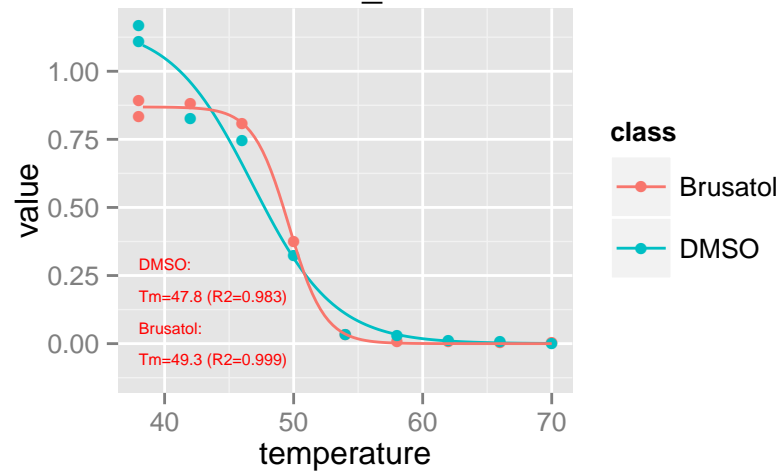

Prot: S30BP\_HUMAN

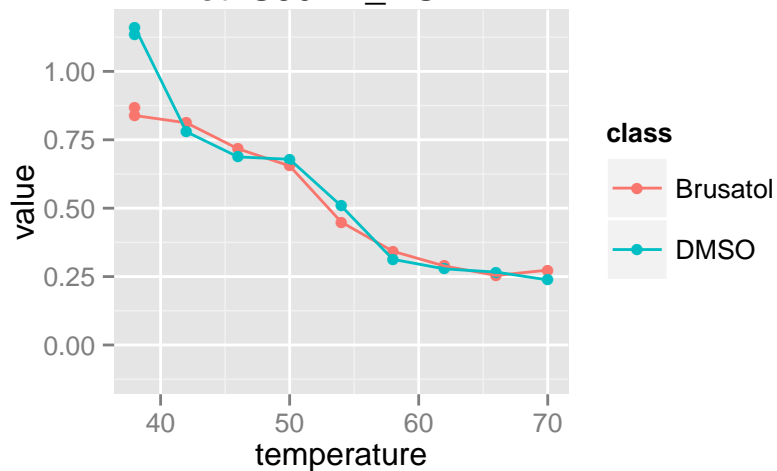

Prot: SAAL1\_HUMAN

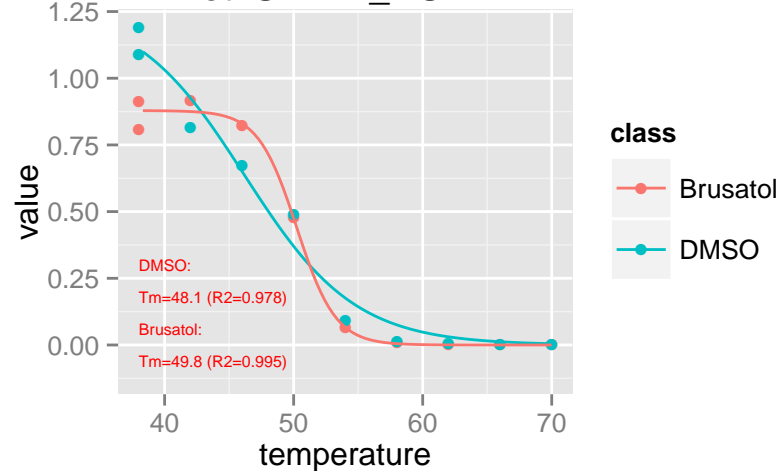

Prot: SAE1\_HUMAN

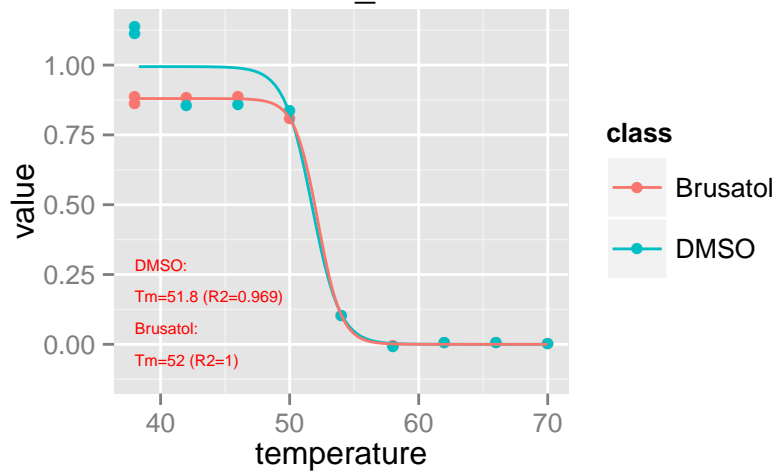

Prot: SAE2\_HUMAN

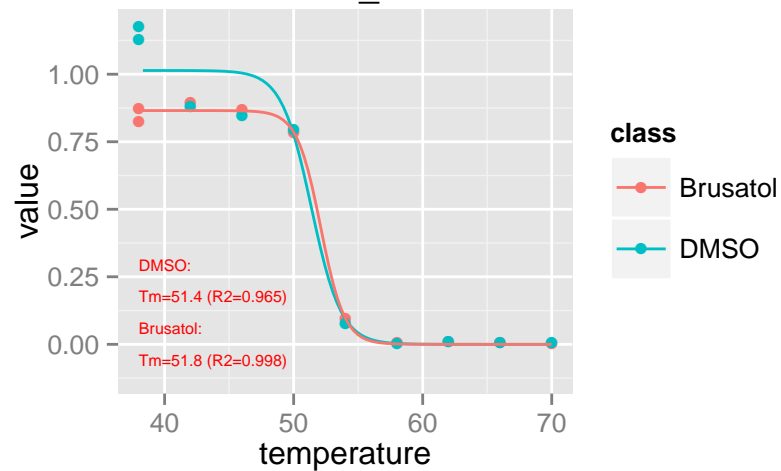

Prot: SAFB1\_HUMAN

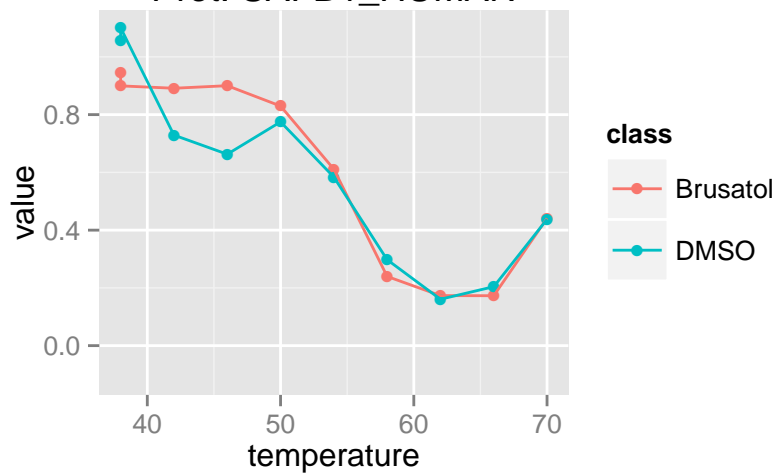

Prot: SAHH\_HUMAN

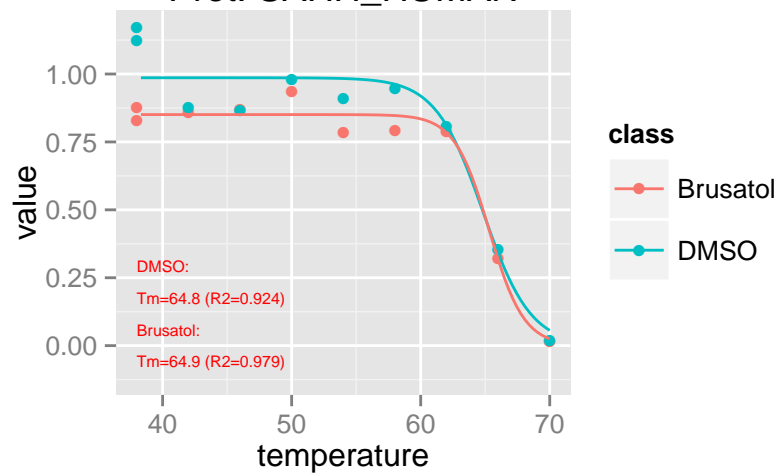

Prot: SAHH2\_HUMAN

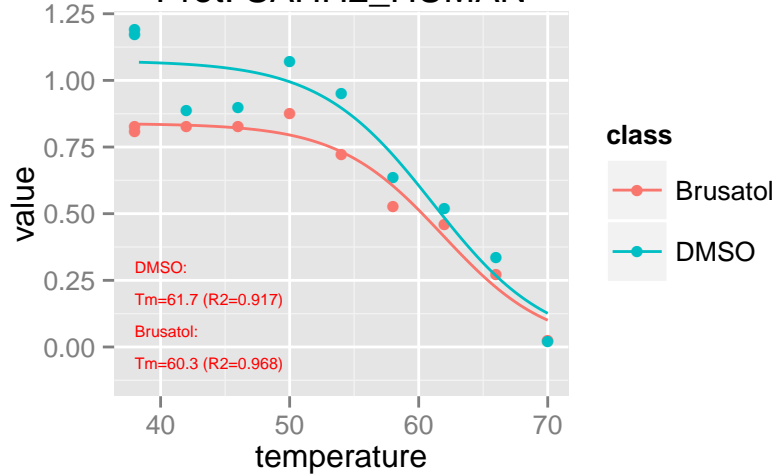

Prot: SAHH3\_HUMAN

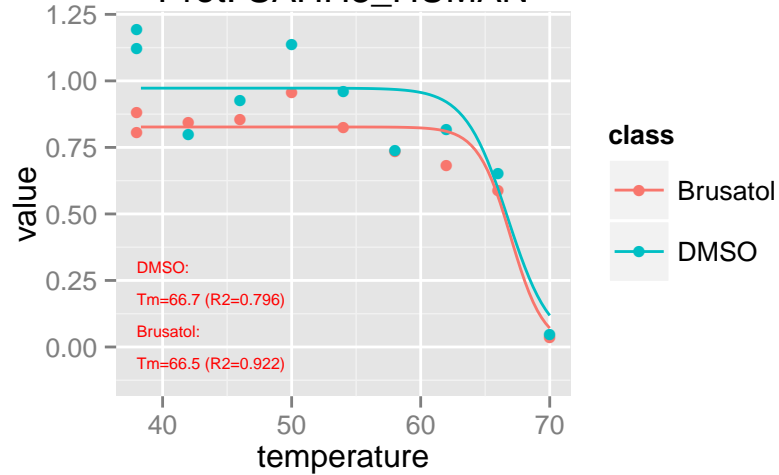

Prot: SAMH1\_HUMAN

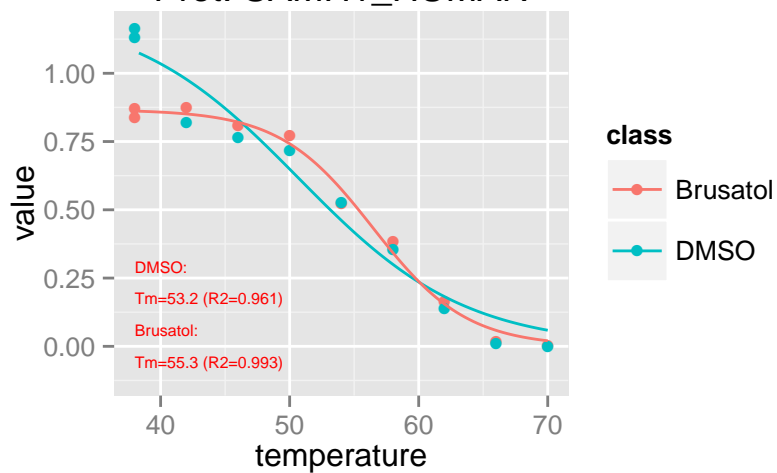

Prot: SAP\_HUMAN

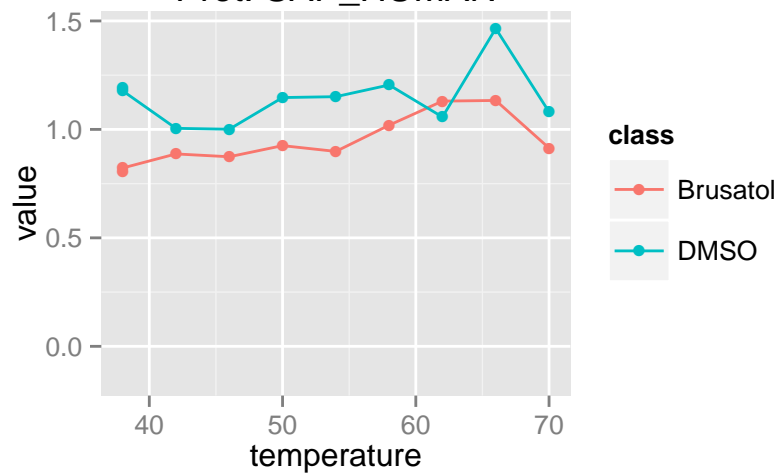

Prot: SAR1A\_HUMAN

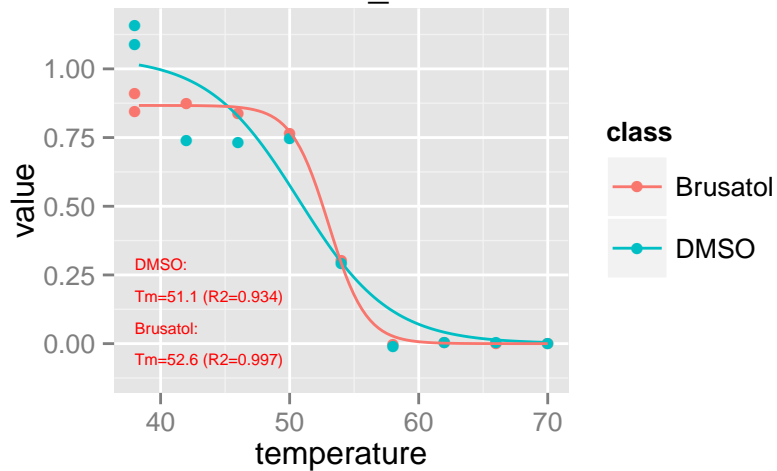

Prot: SAR1B\_HUMAN

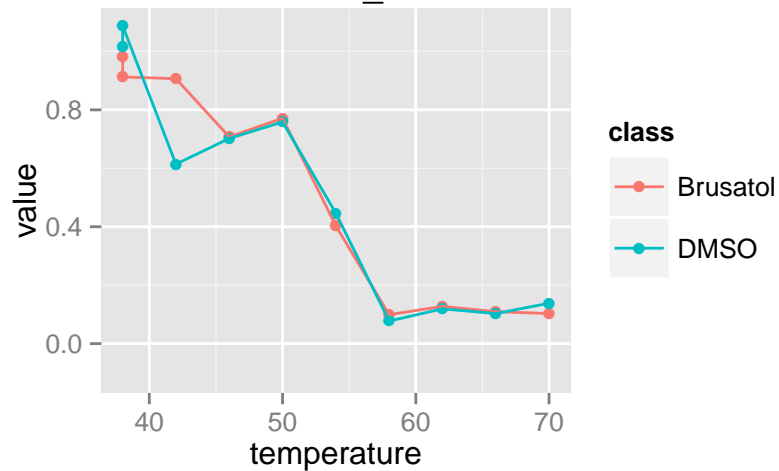

Prot: SARG\_HUMAN

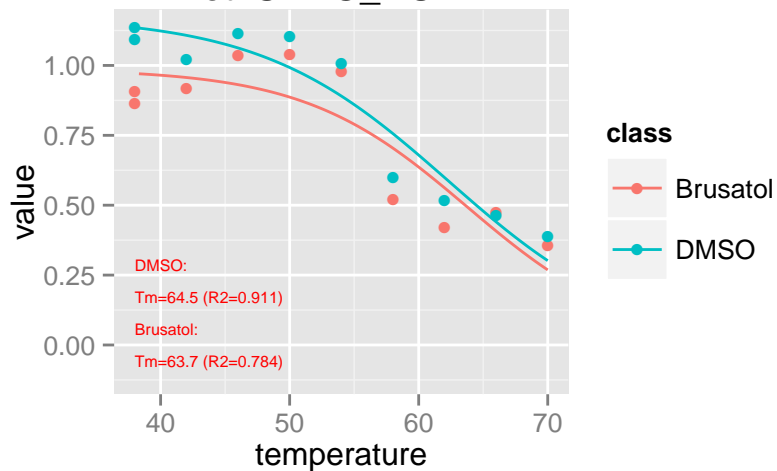

Prot: SARNP\_HUMAN

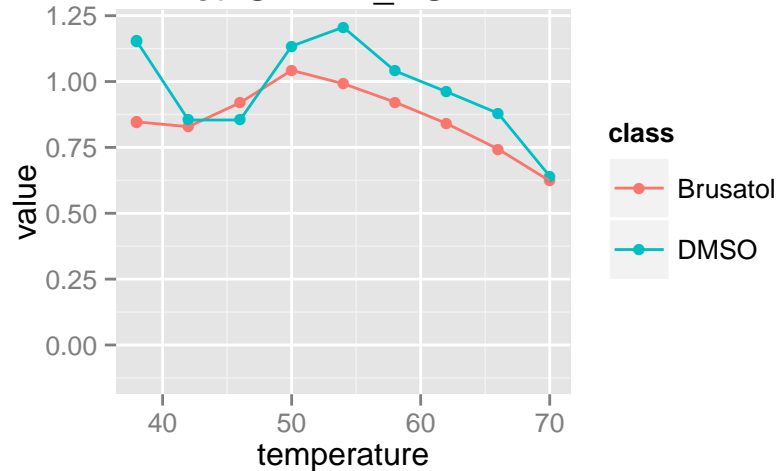

Prot: SART3\_HUMAN

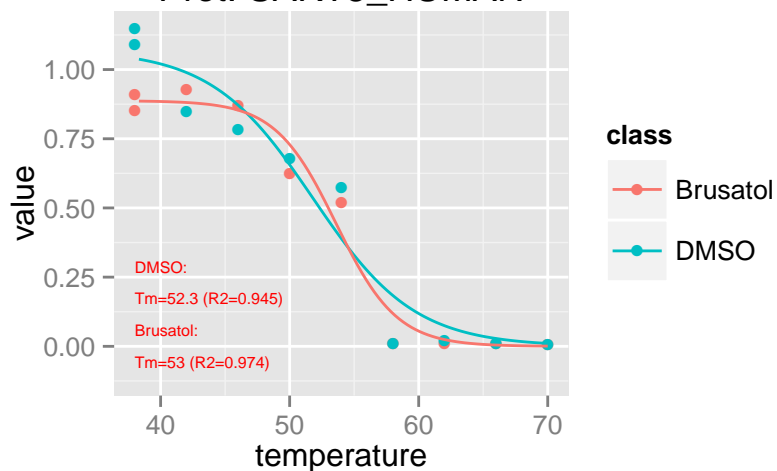

Prot: SBDS\_HUMAN

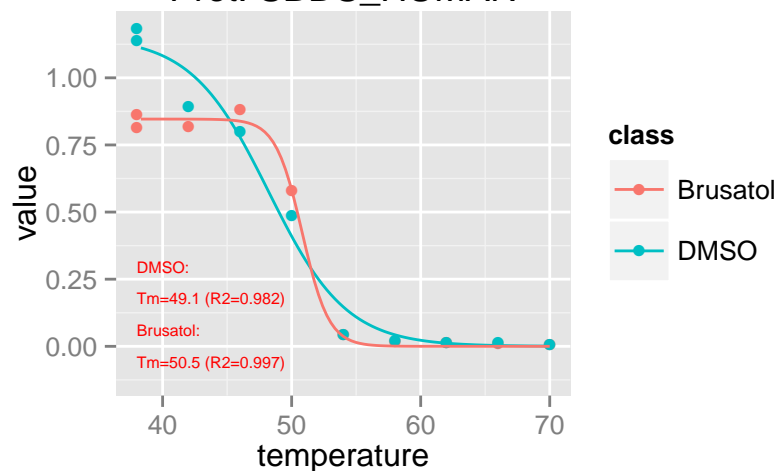

Prot: SBNO1\_HUMAN

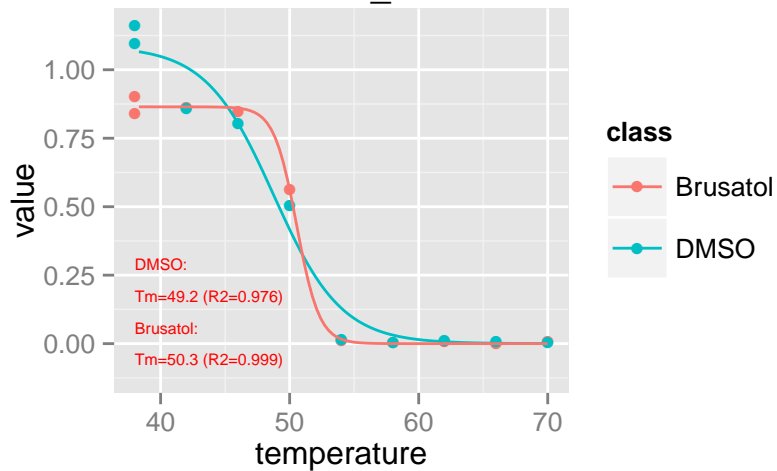

Prot: SBP1\_HUMAN

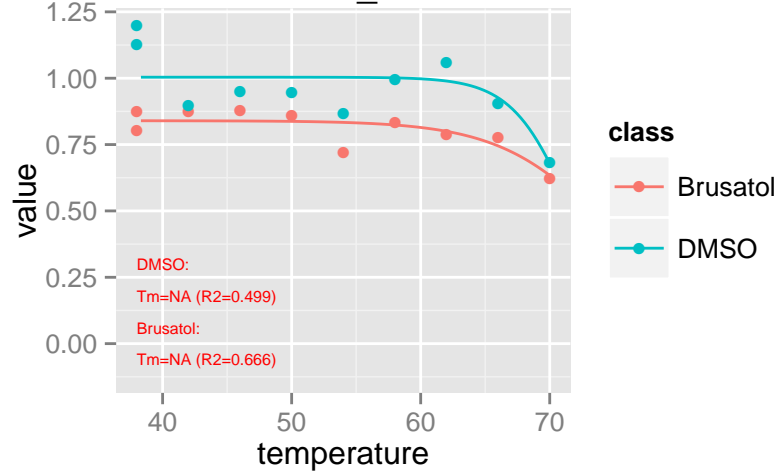

Prot: SC16A\_HUMAN

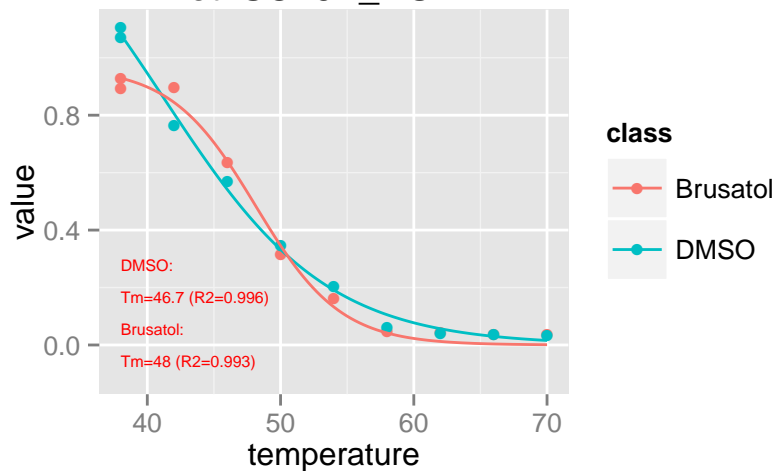

Prot: SC23A\_HUMAN

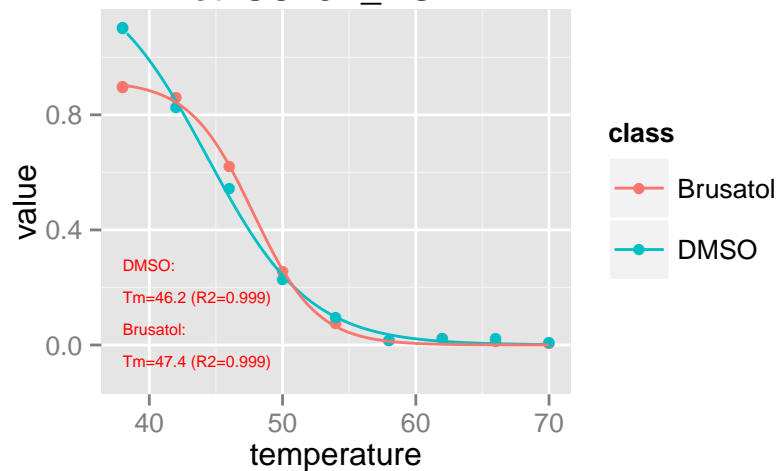

Prot: SC23B\_HUMAN

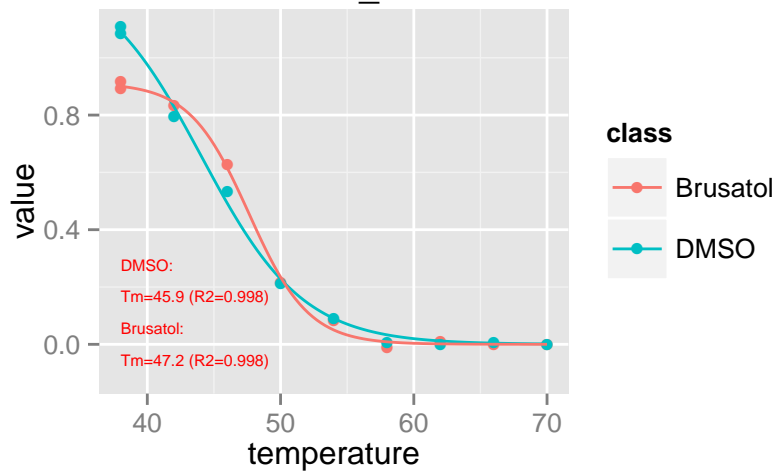

Prot: SC24A\_HUMAN

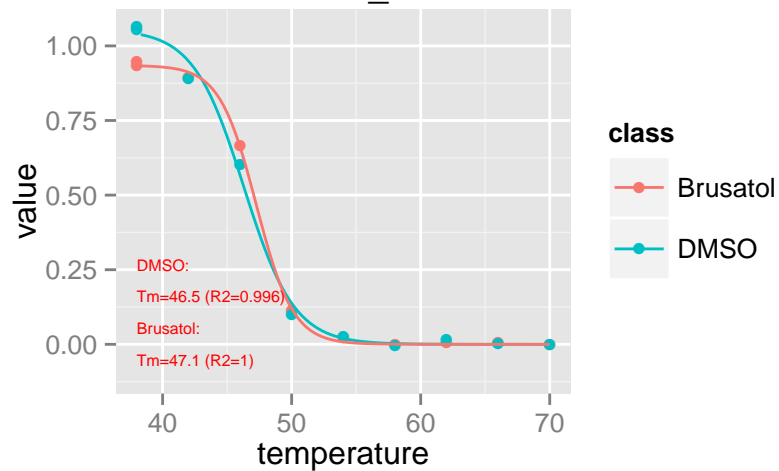

Prot: SC24B\_HUMAN

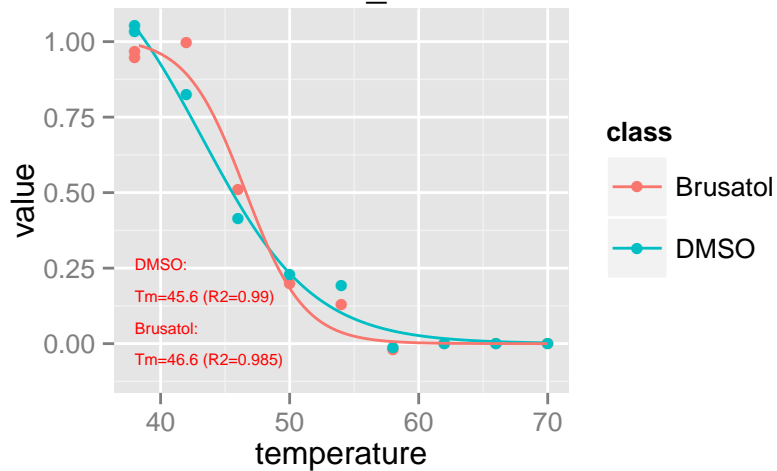

Prot: SC24C\_HUMAN

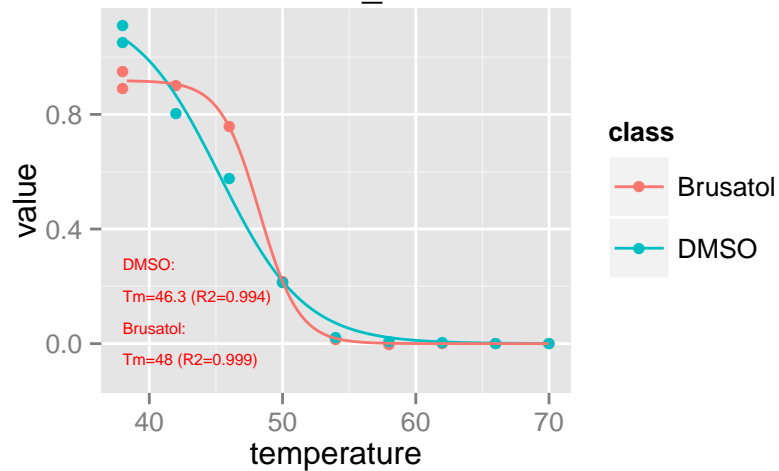

Prot: SC31A\_HUMAN

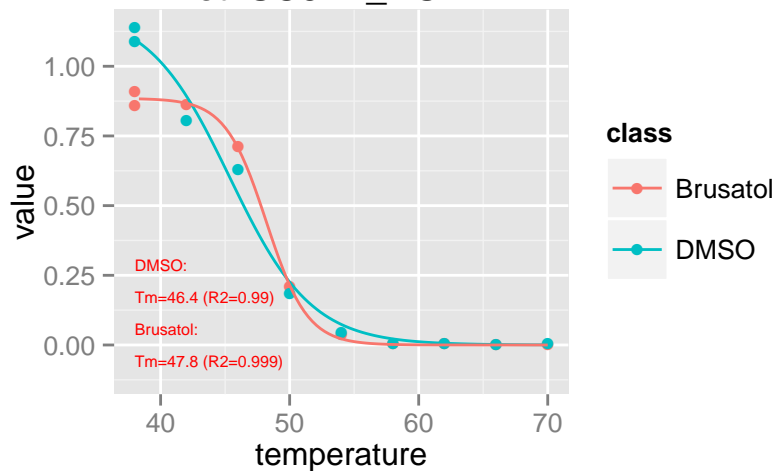

Prot: SCAF8\_HUMAN

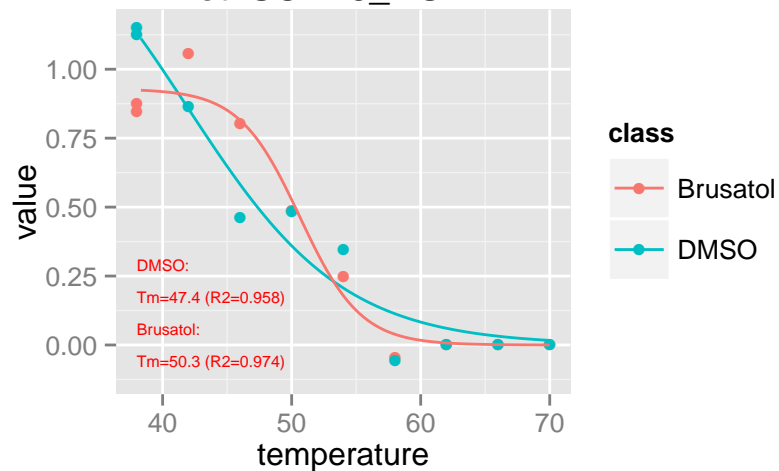

Prot: SCAFB\_HUMAN

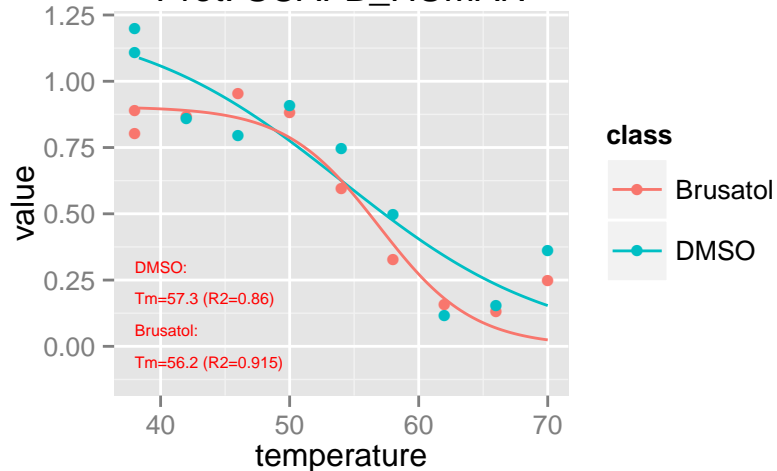

Prot: SCFD1\_HUMAN

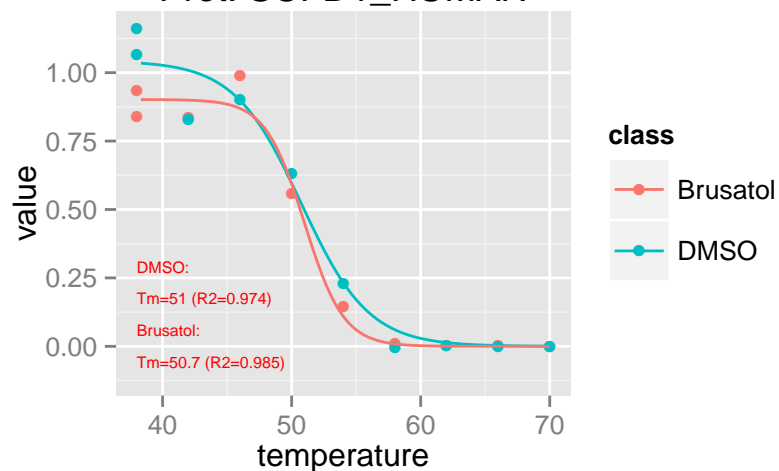

Prot: SCLY\_HUMAN

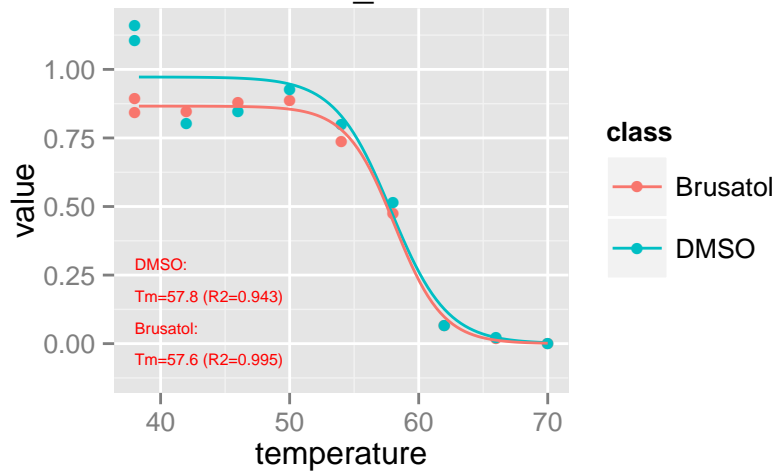

Prot: SCO1\_HUMAN

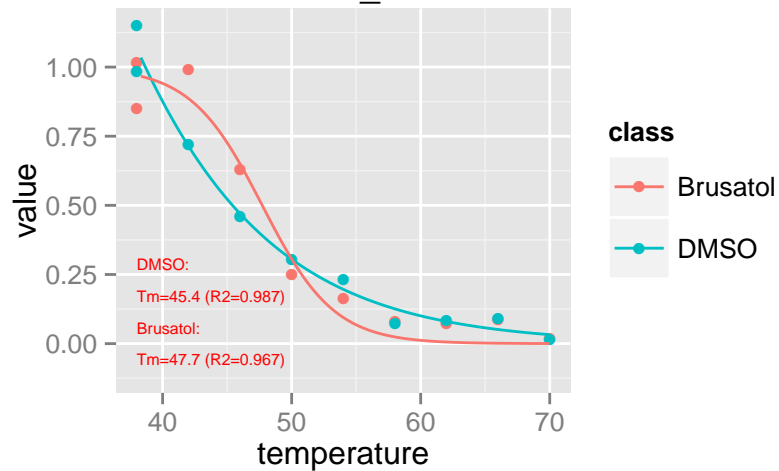

Prot: SCRIB\_HUMAN

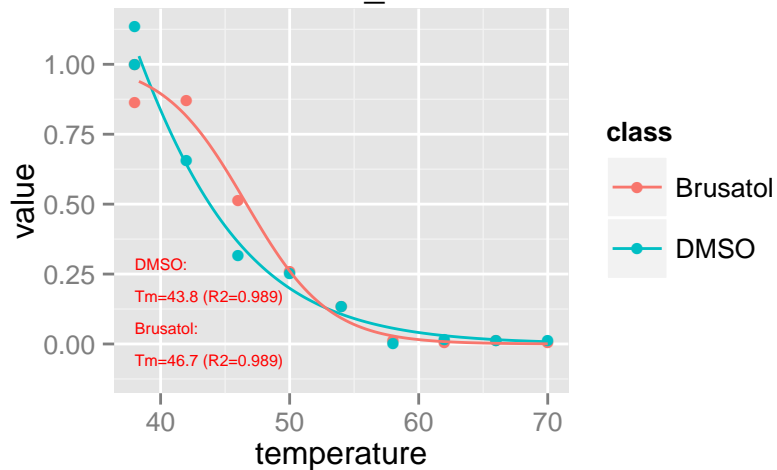

Prot: SCRIN1\_HUMAN

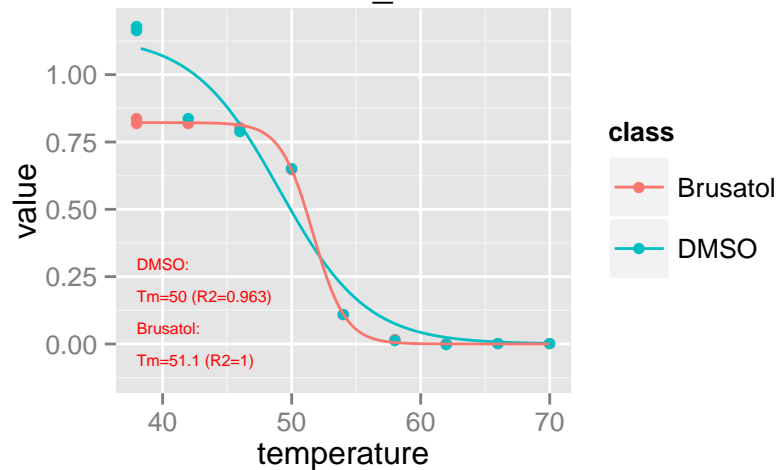

Prot: SCRIN2\_HUMAN

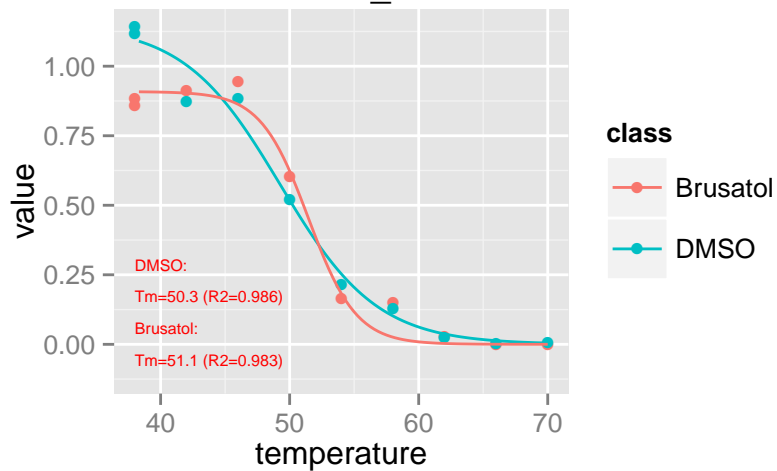

Prot: SCRIN3\_HUMAN

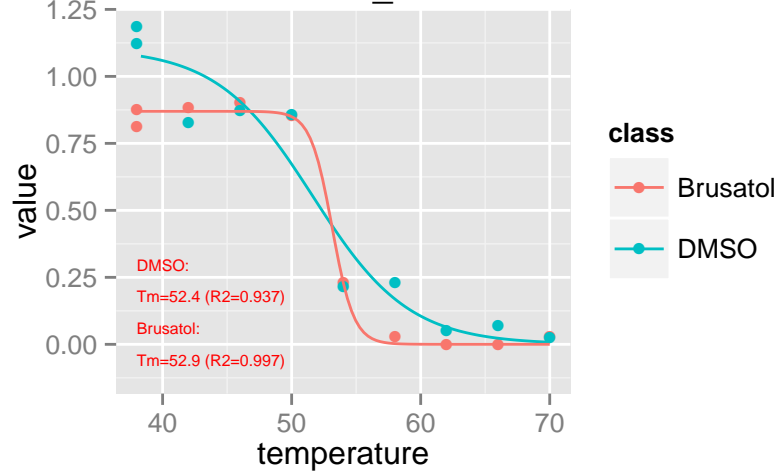

Prot: SCYL2\_HUMAN

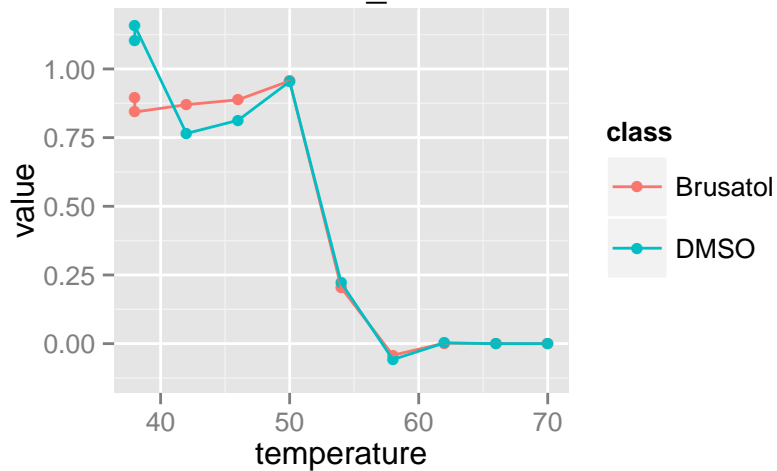

Prot: SDC1\_HUMAN

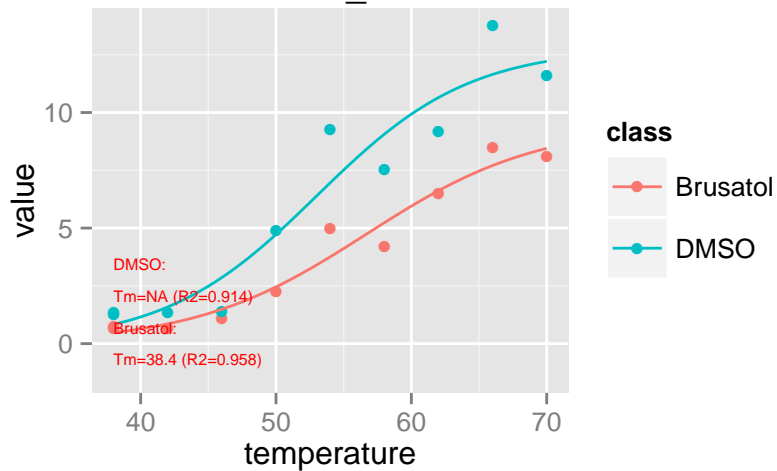

Prot: SDCB1\_HUMAN

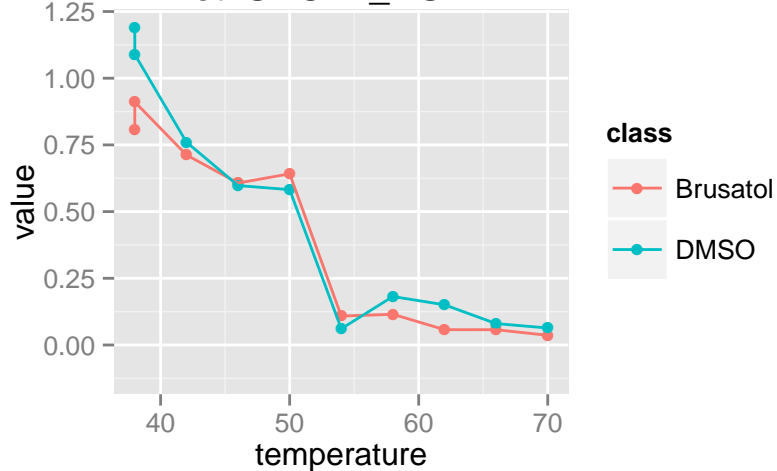

Prot: SDF2L\_HUMAN

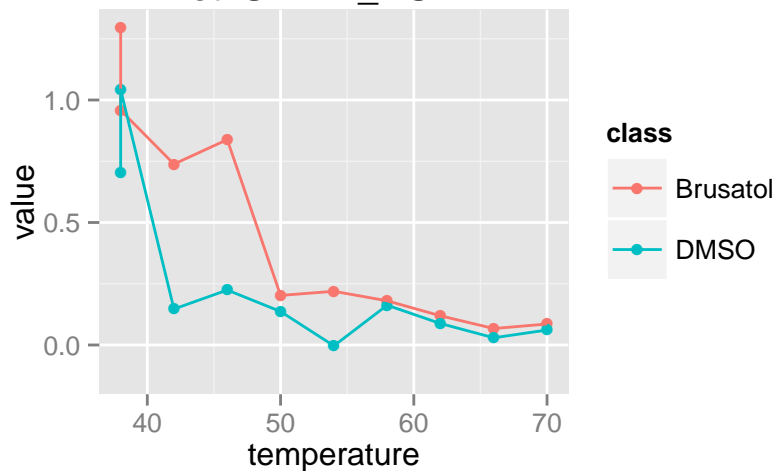

Prot: SDPR\_HUMAN

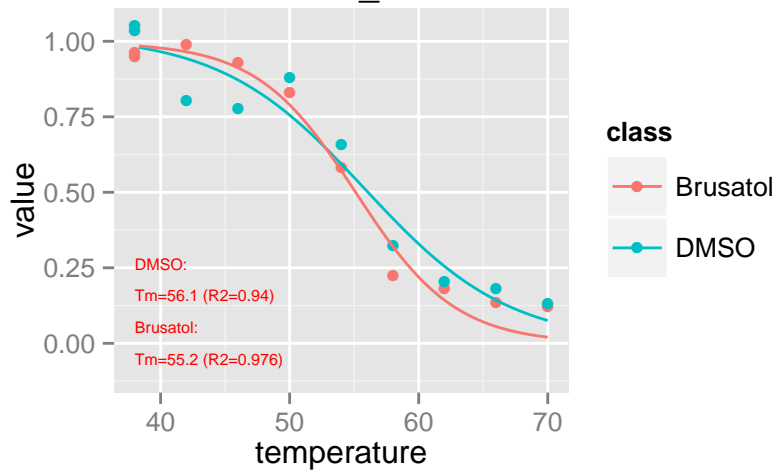

Prot: SDSL\_HUMAN

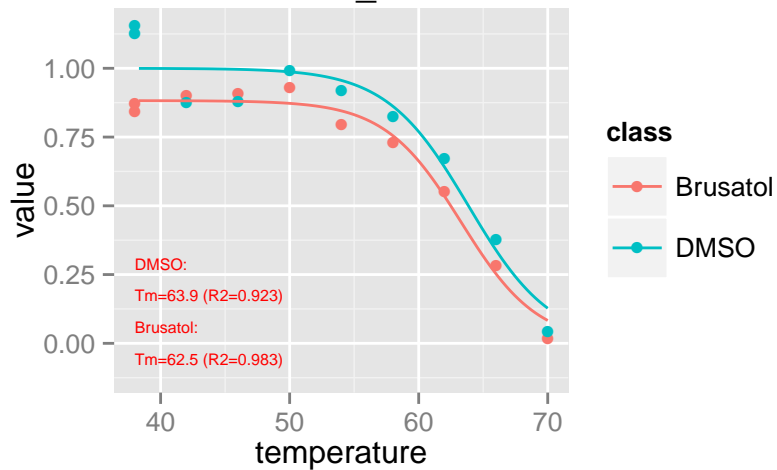

Prot: SEC13\_HUMAN

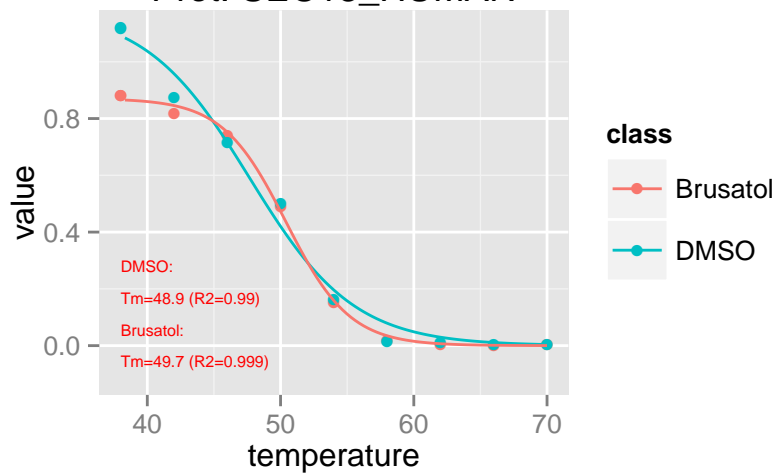

Prot: SEH1\_HUMAN

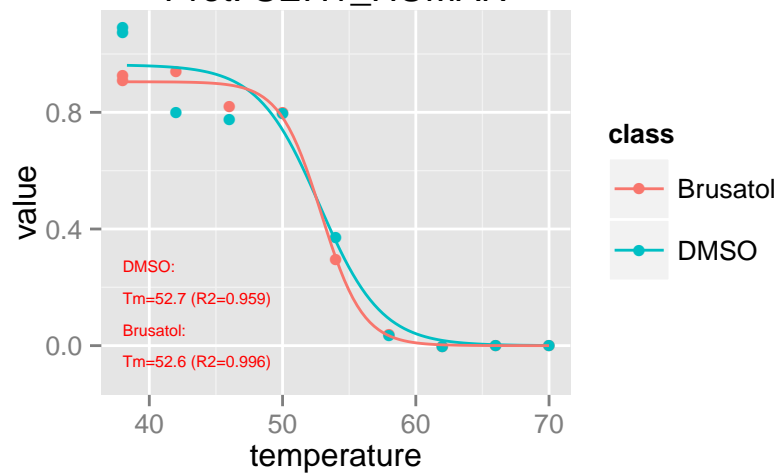

Prot: SELB\_HUMAN

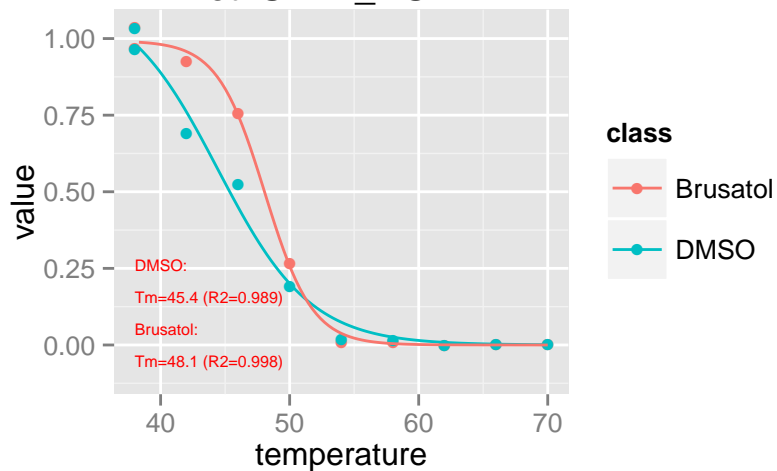

Prot: SELH\_HUMAN

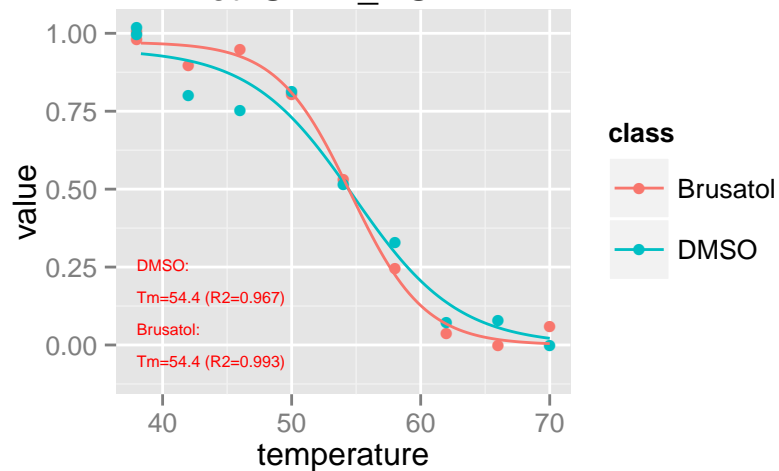

Prot: SELR1\_HUMAN

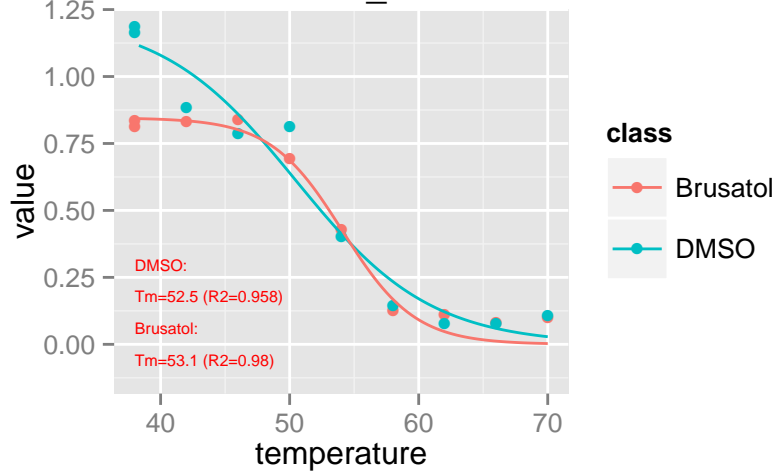

Prot: SEN15\_HUMAN

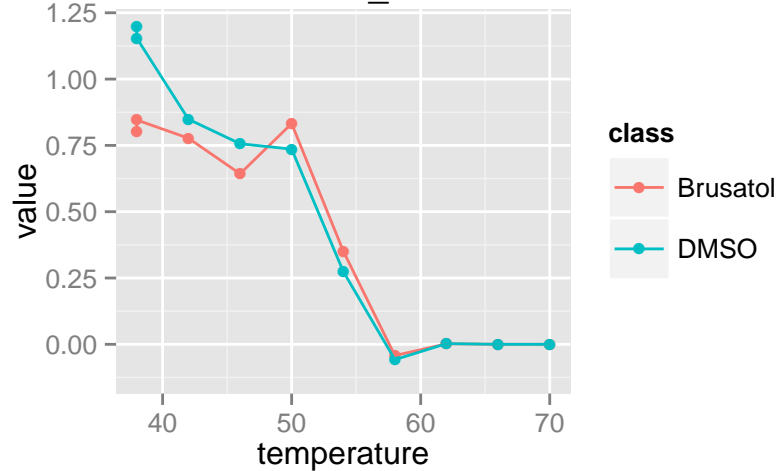



Prot: SEN34\_HUMAN

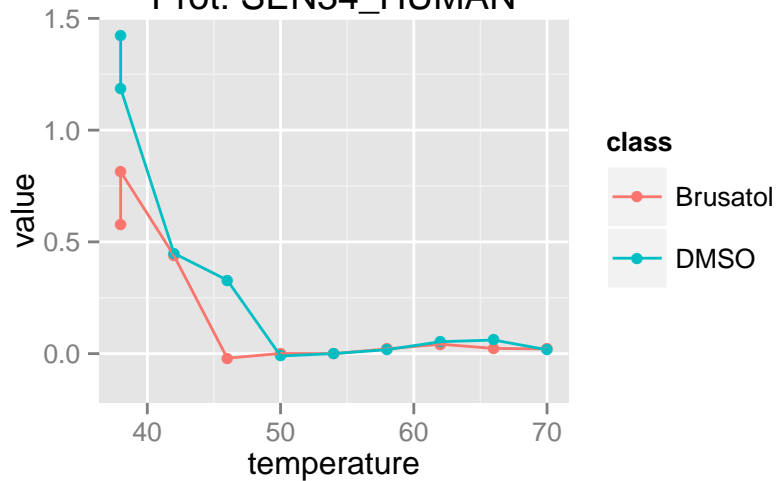

Prot: SEN54\_HUMAN

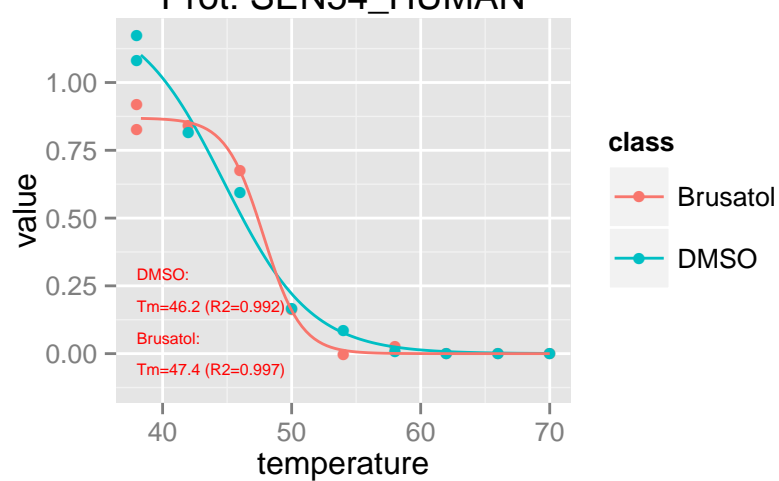

Prot: SENP3\_HUMAN

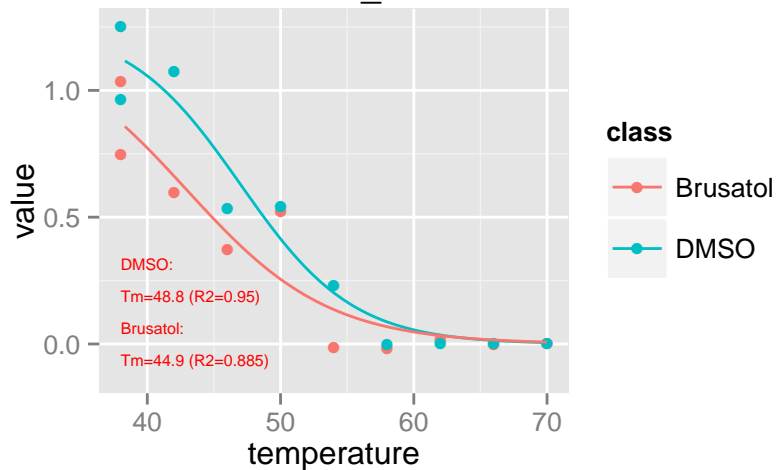

Prot: SEP10\_HUMAN

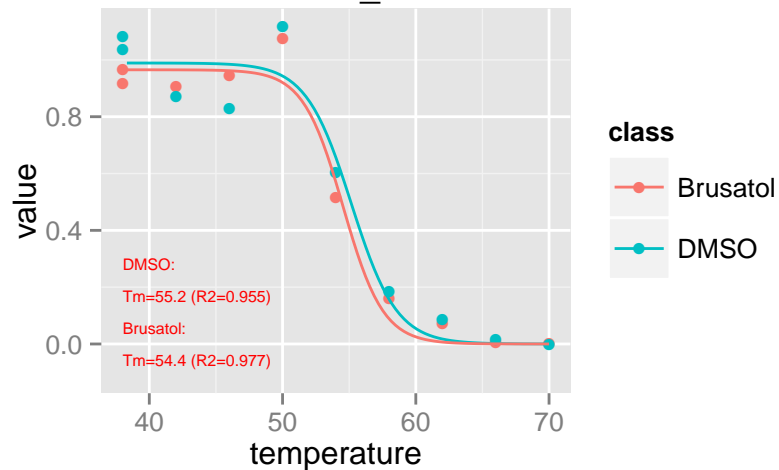

Prot: SEP11\_HUMAN

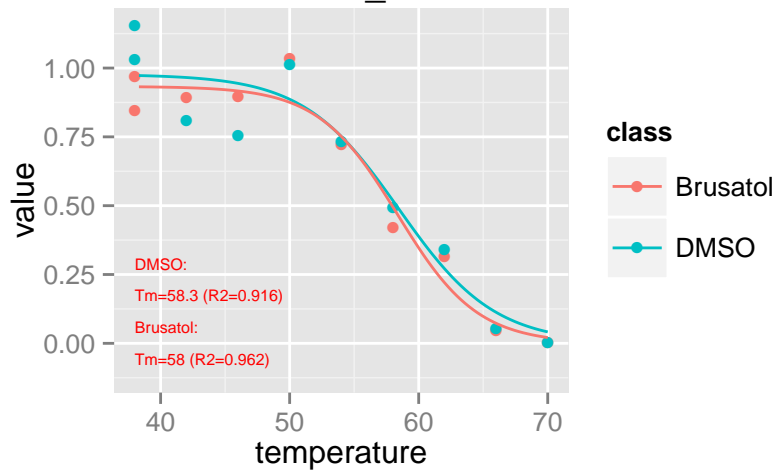

Prot: SEP15\_HUMAN

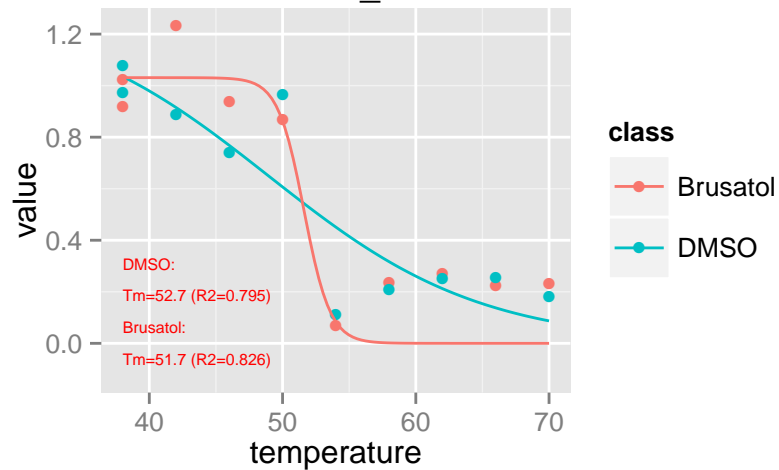

Prot: SEPT2\_HUMAN

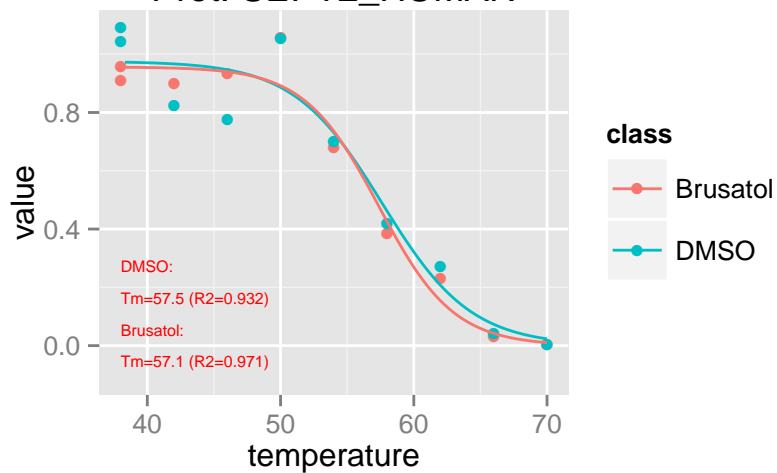

Prot: SEPT6\_HUMAN

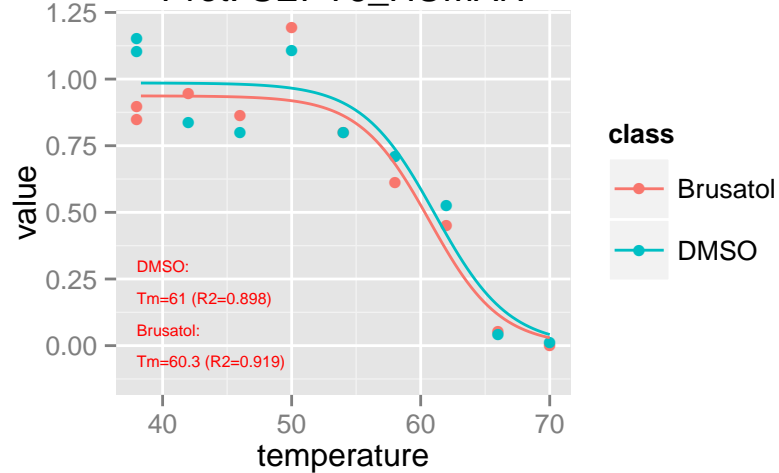

Prot: SEPT7\_HUMAN

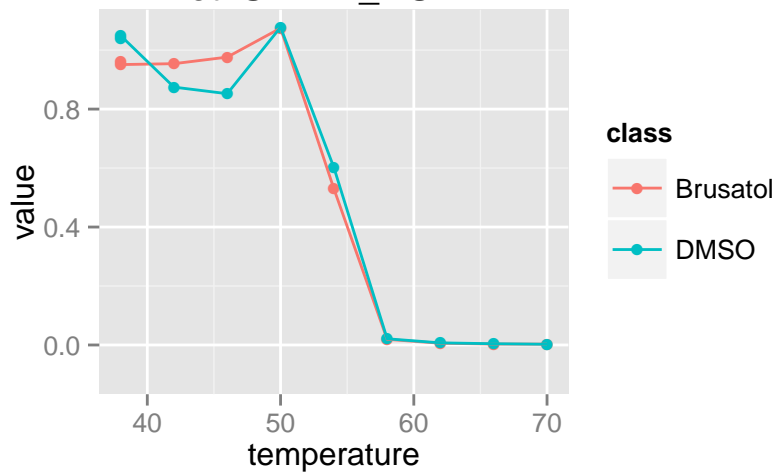

Prot: SEPT8\_HUMAN

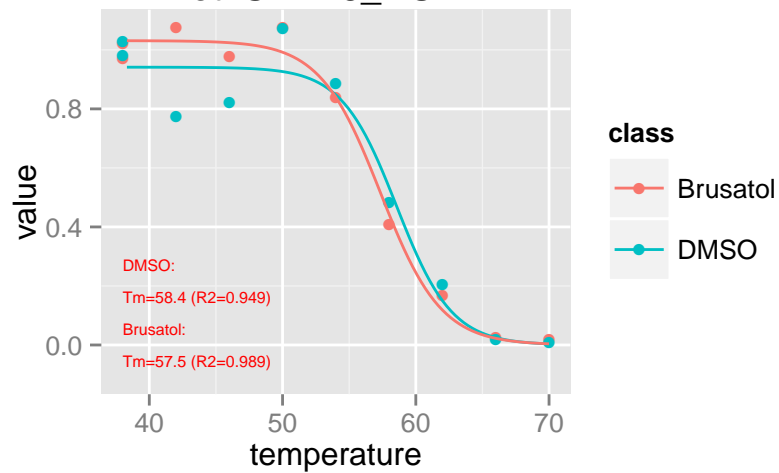

Prot: SEPT9\_HUMAN

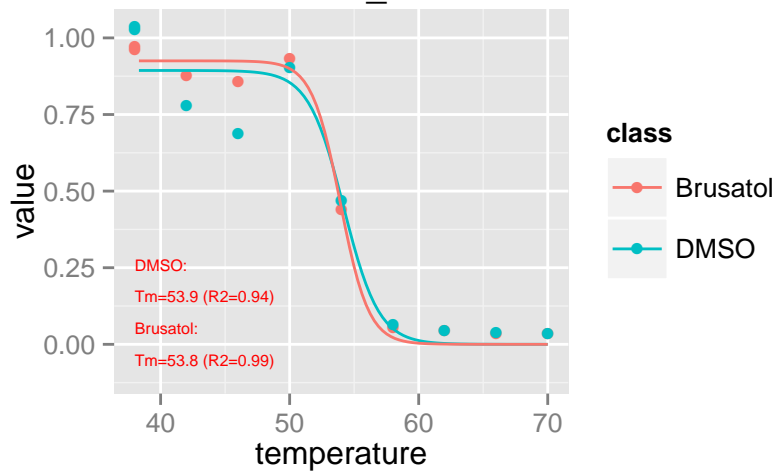

Prot: SERA\_HUMAN

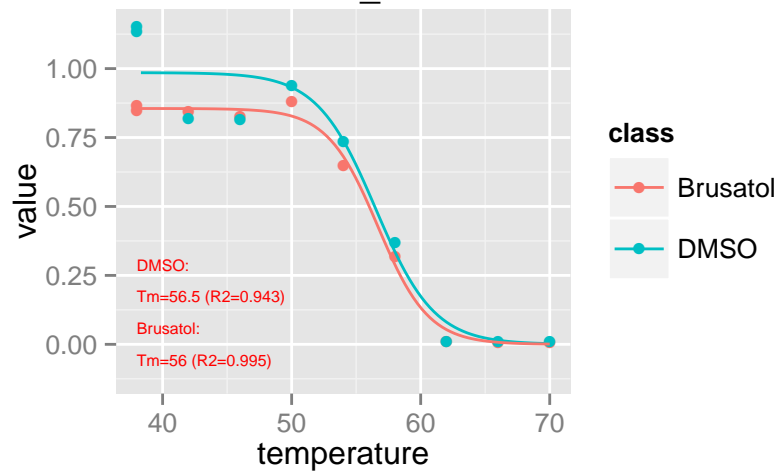

Prot: SERB\_HUMAN

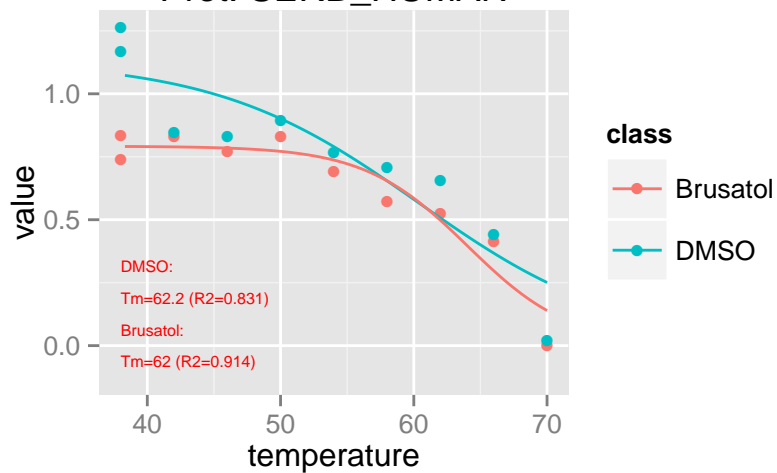

Prot: SERC\_HUMAN

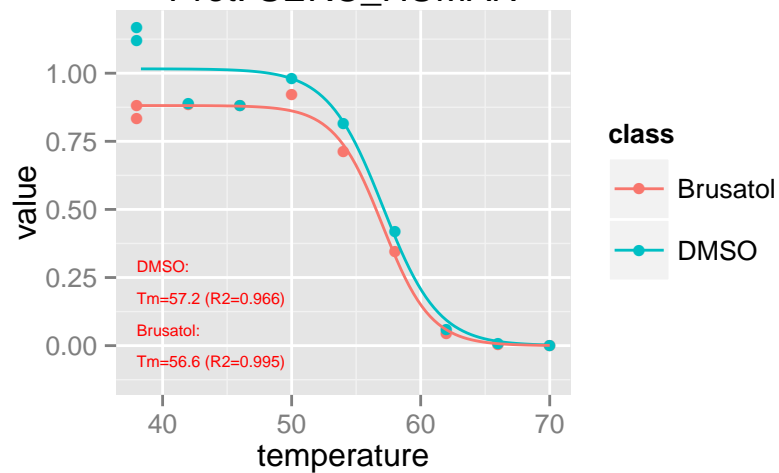

Prot: SERF2\_HUMAN

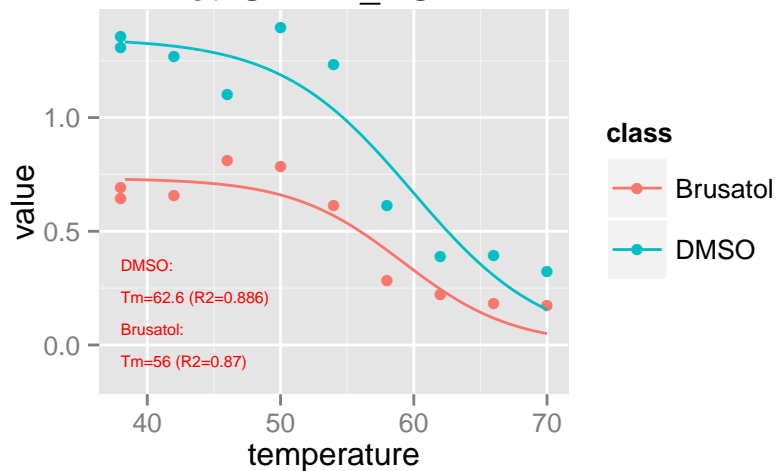

Prot: SERPH\_HUMAN

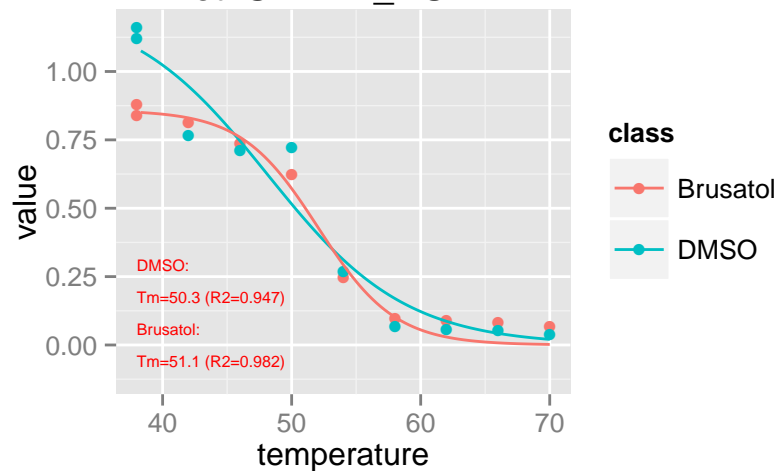

Prot: SET\_HUMAN

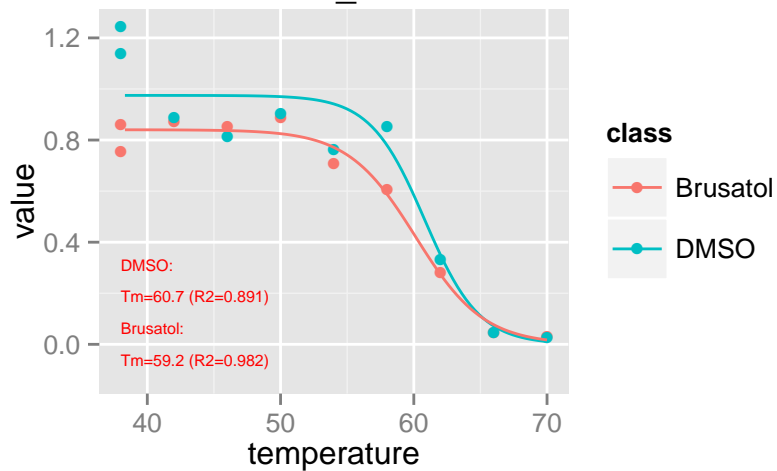

Prot: SETD3\_HUMAN

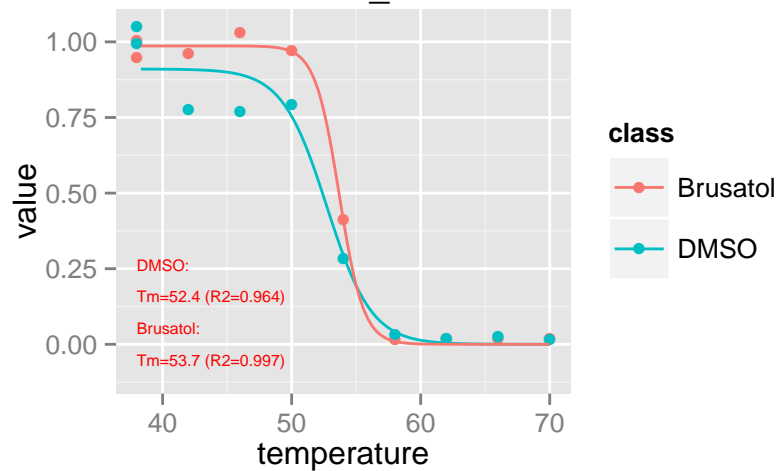

Prot: SETD7\_HUMAN

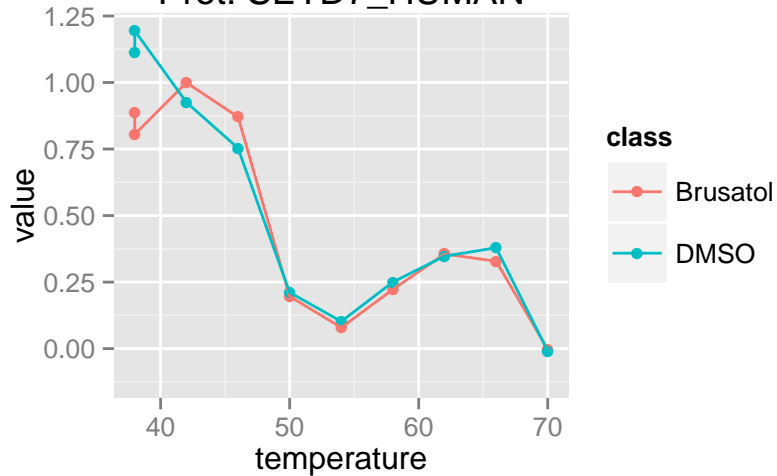

Prot: SF01\_HUMAN

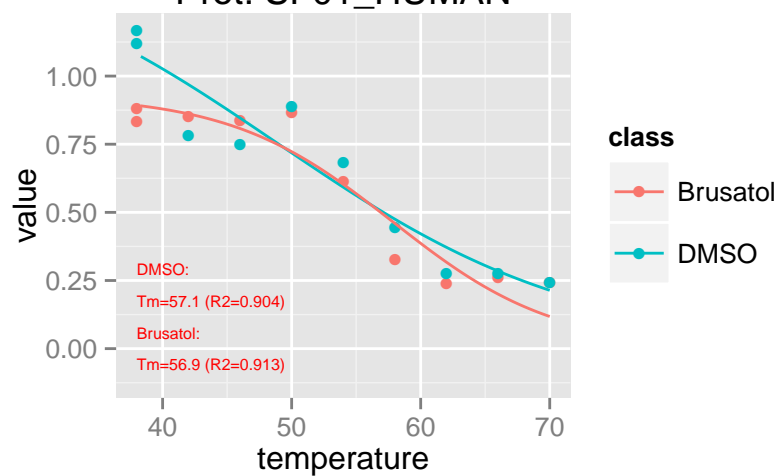

Prot: SF3A1\_HUMAN

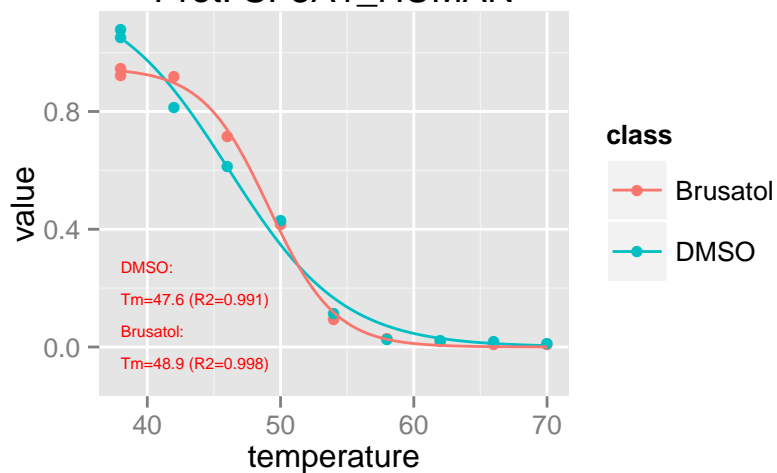

Prot: SF3A2\_HUMAN

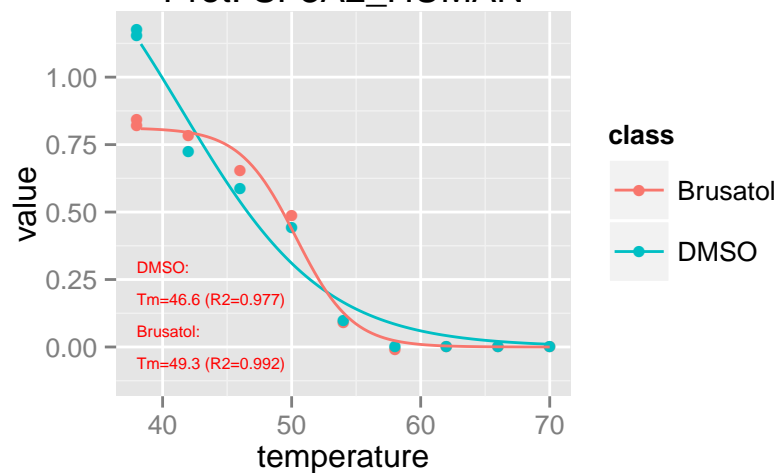

Prot: SF3A3\_HUMAN

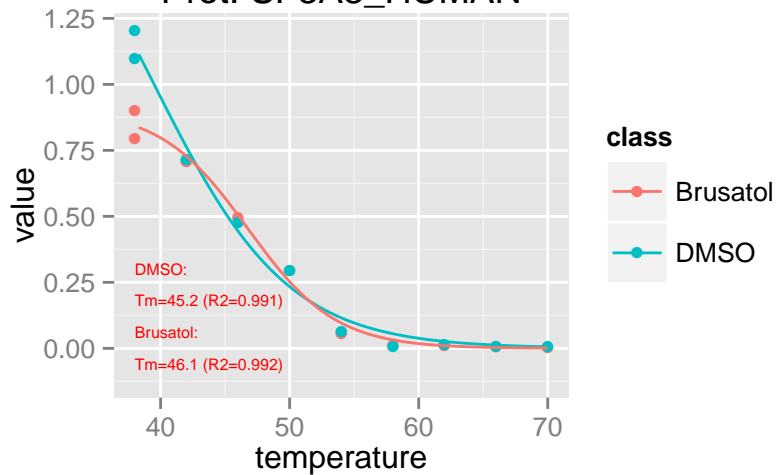

Prot: SF3B1\_HUMAN

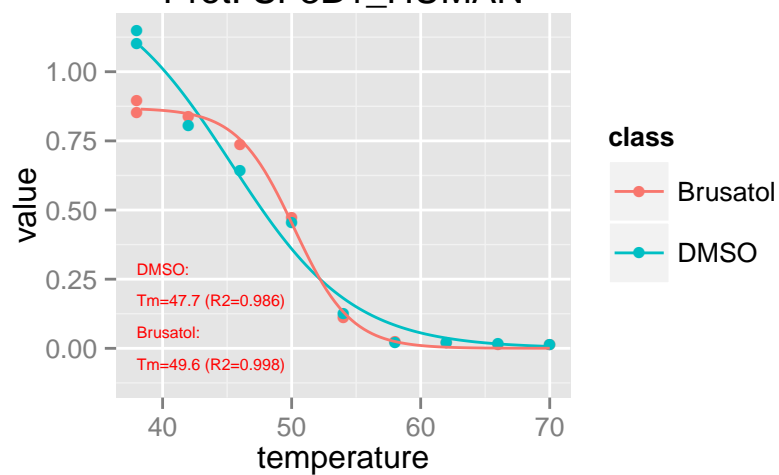

Prot: SF3B2\_HUMAN

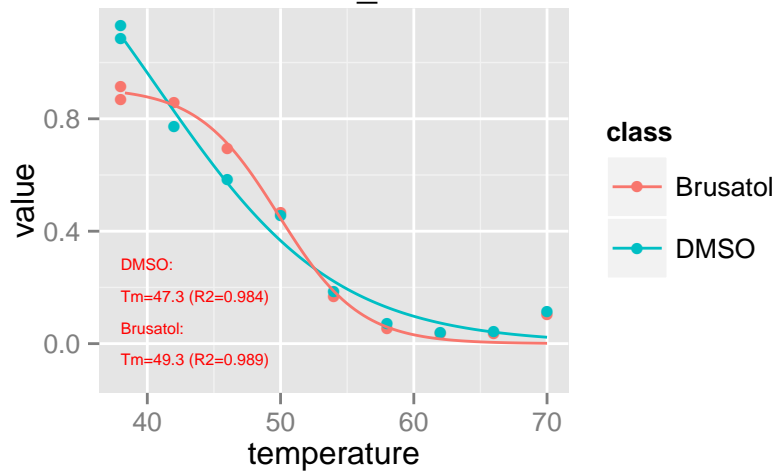

Prot: SF3B3\_HUMAN

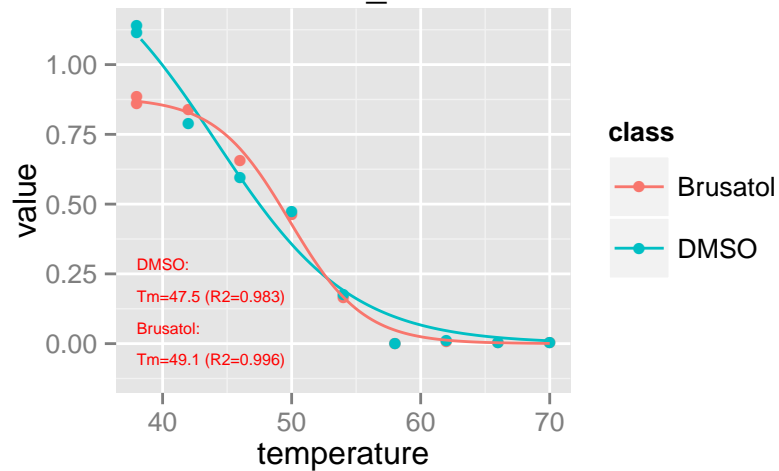

Prot: SF3B4\_HUMAN

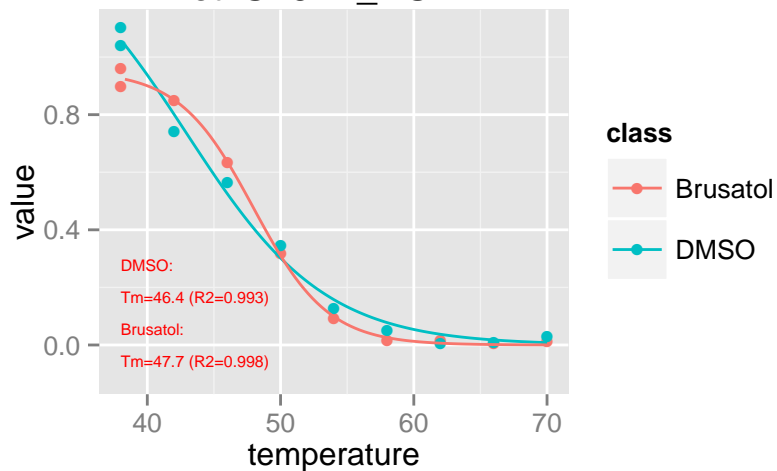

Prot: SF3B5\_HUMAN

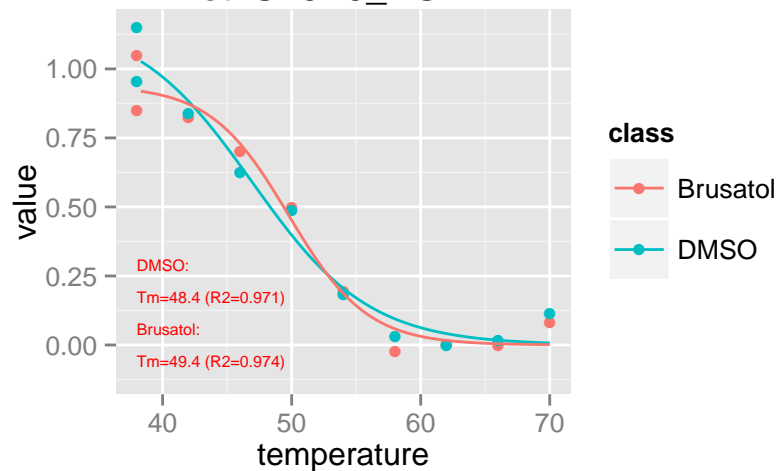

Prot: SFPQ\_HUMAN

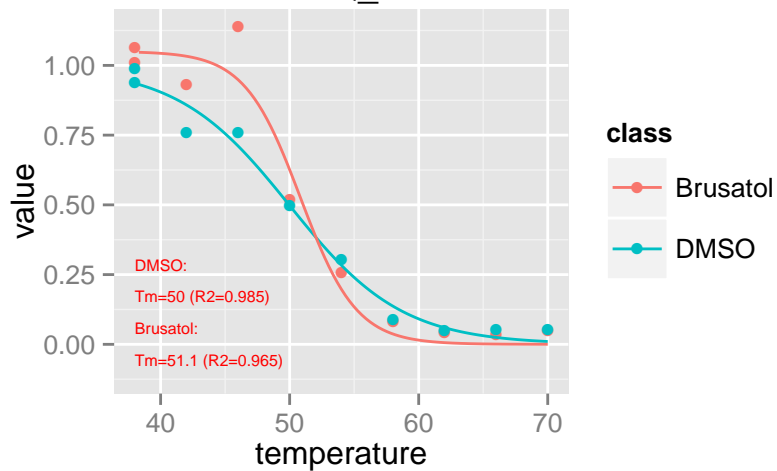

Prot: SFR15\_HUMAN

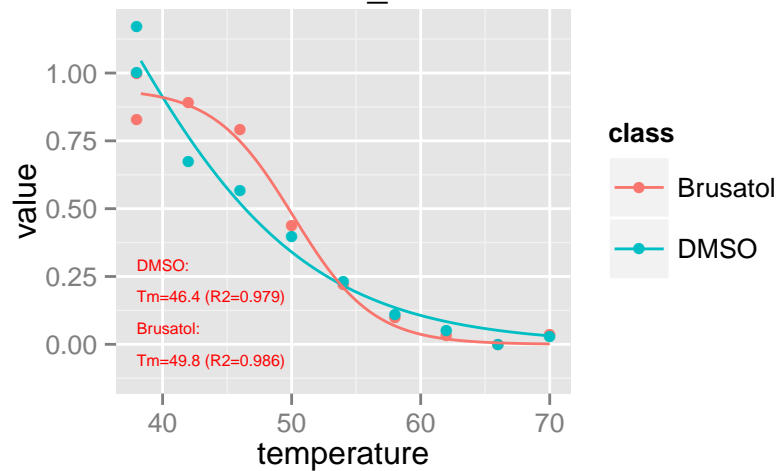

Prot: SG223\_HUMAN

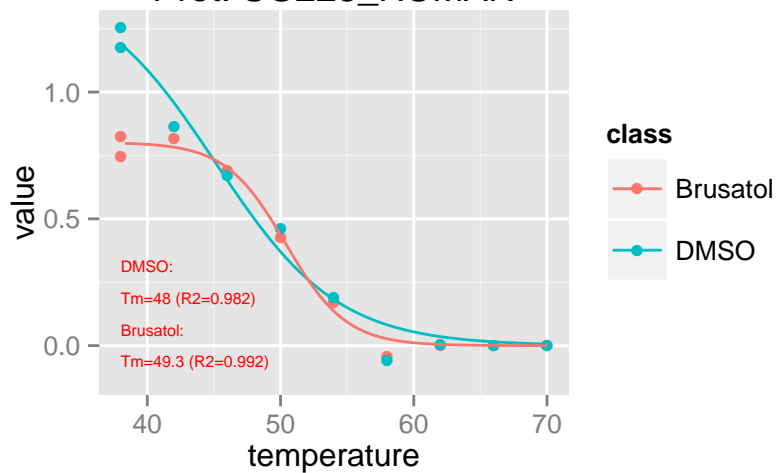

Prot: SGT1\_HUMAN

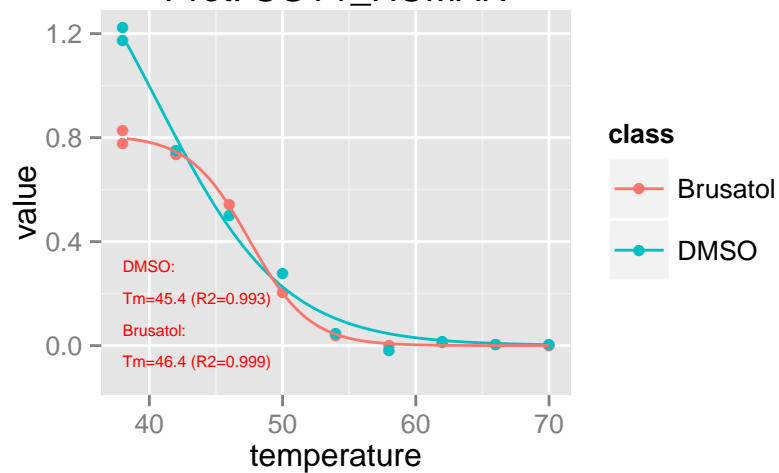

Prot: SGTA\_HUMAN

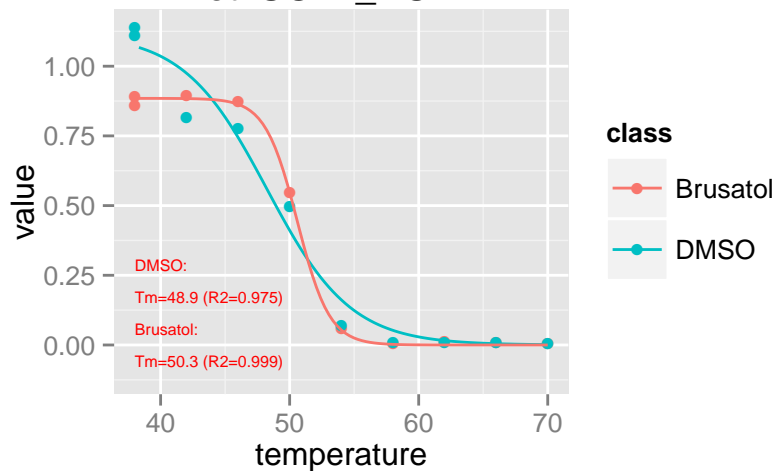

Prot: SGTB\_HUMAN

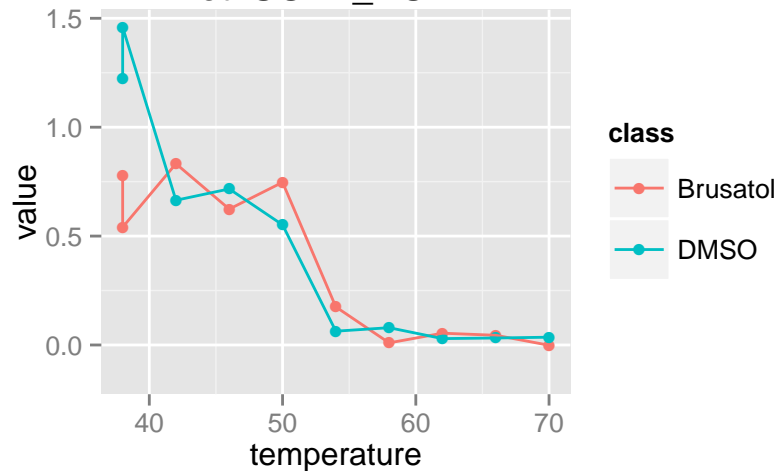

Prot: SH24A\_HUMAN

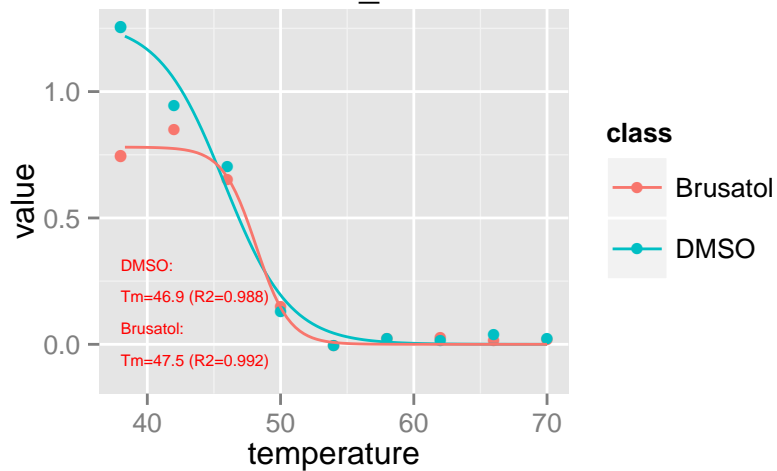

Prot: SH3G1\_HUMAN

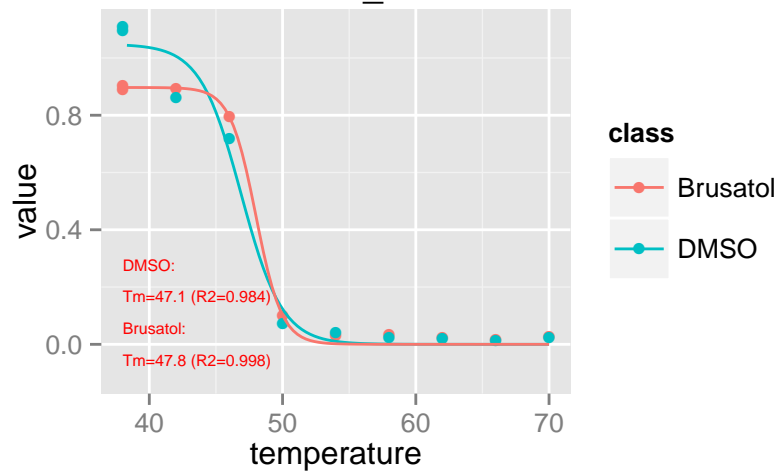

Prot: SH3K1\_HUMAN

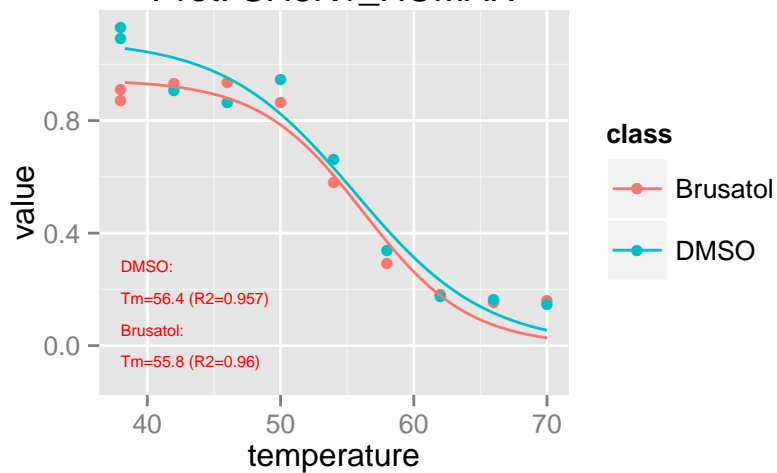

Prot: SH3L1\_HUMAN

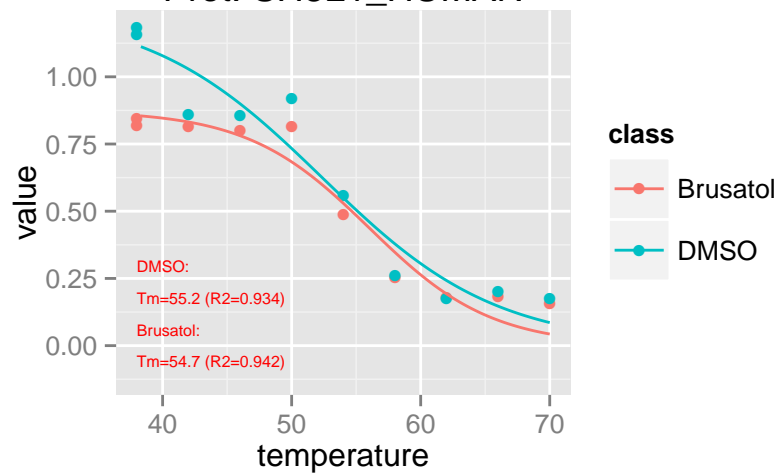

Prot: SH3L3\_HUMAN

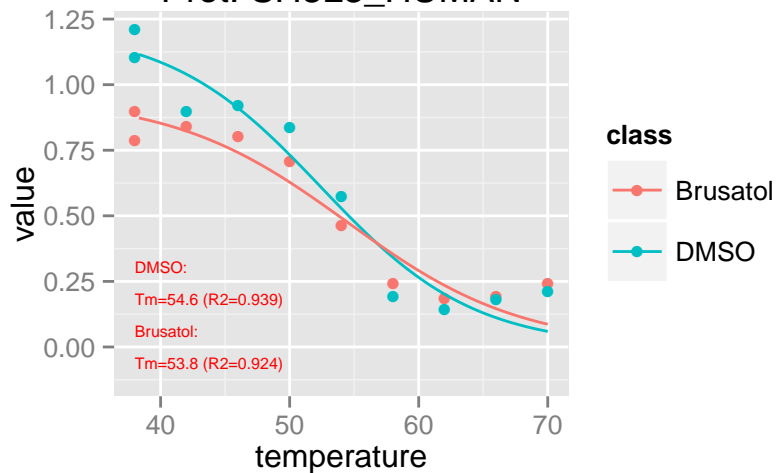

Prot: SH3R1\_HUMAN

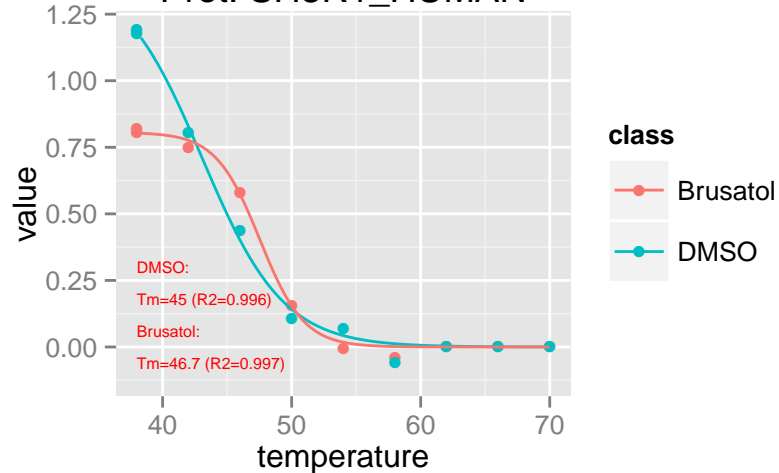

Prot: SHC1\_HUMAN

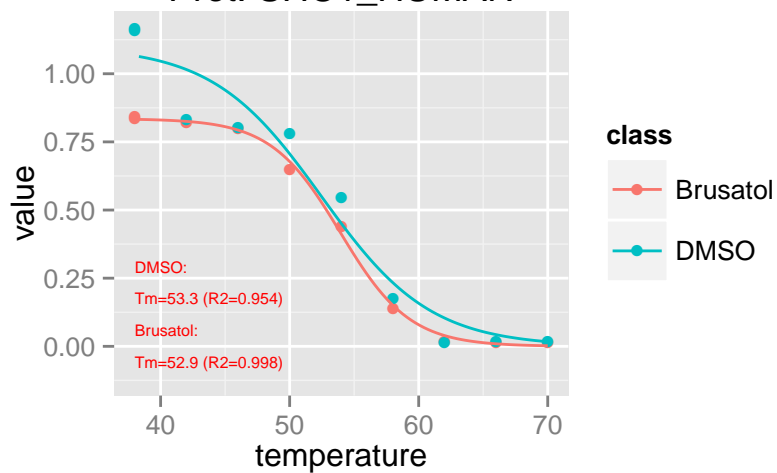

Prot: SHCBP\_HUMAN

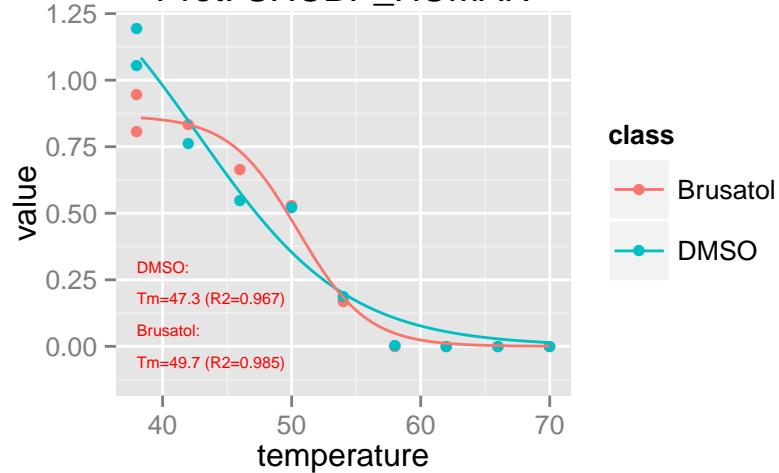

Prot: SHIP2\_HUMAN

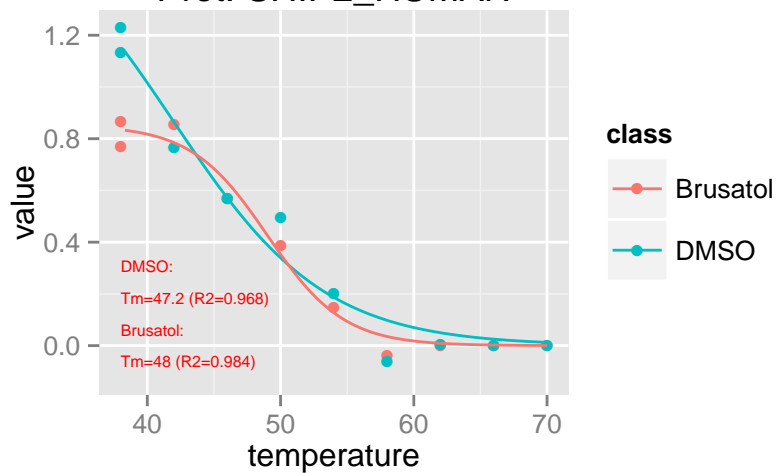

Prot: SHLB1\_HUMAN

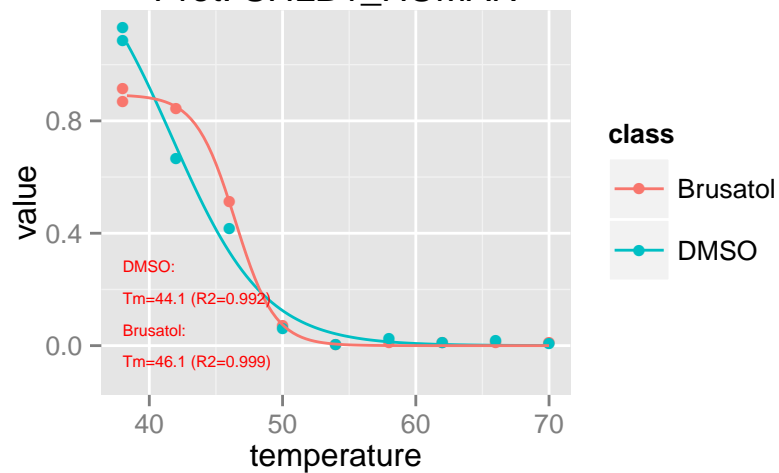

Prot: SHLB2\_HUMAN

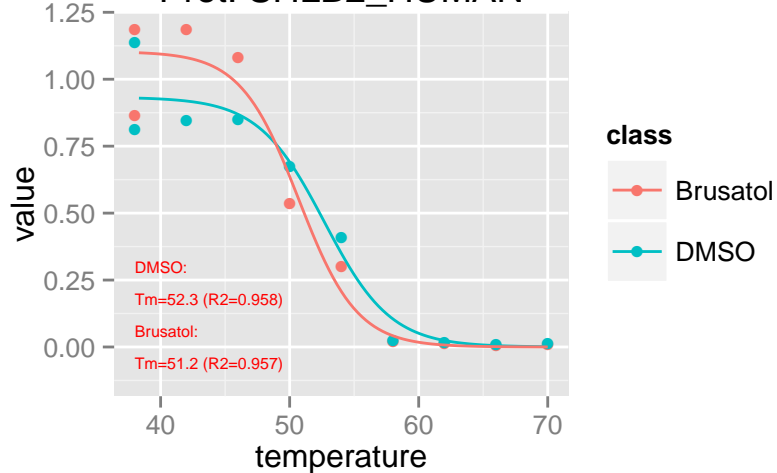

Prot: SHOT1\_HUMAN

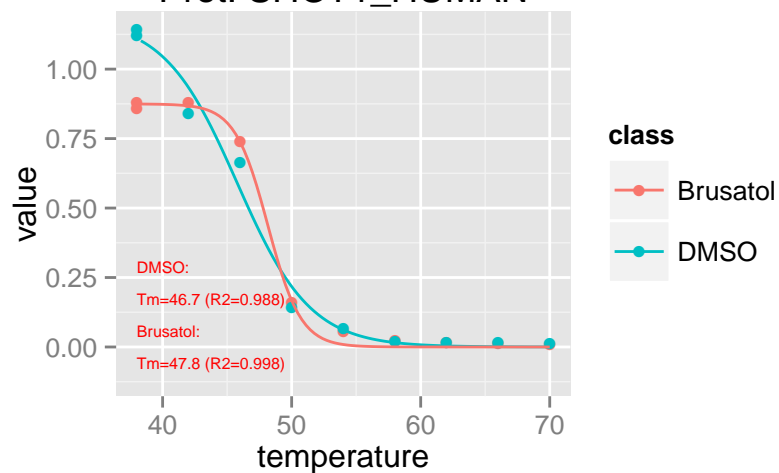

Prot: SHPK\_HUMAN

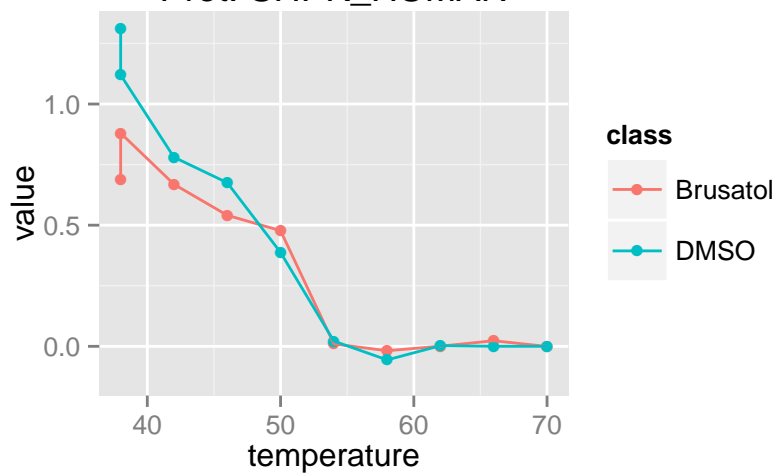

Prot: SHPS1\_HUMAN

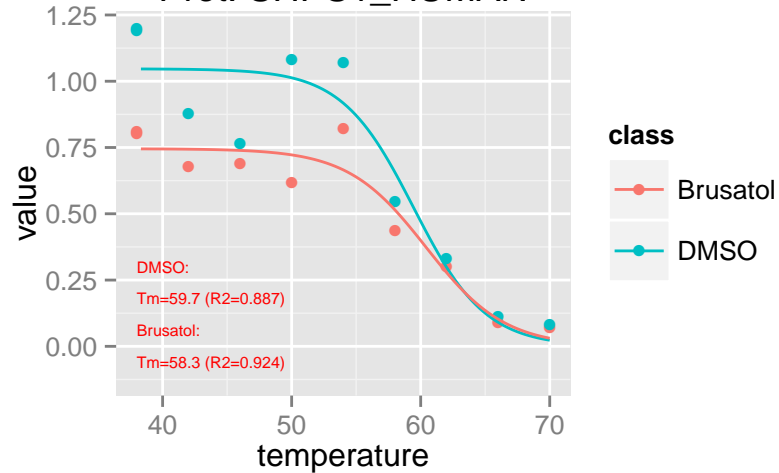



Prot: SIAS\_HUMAN

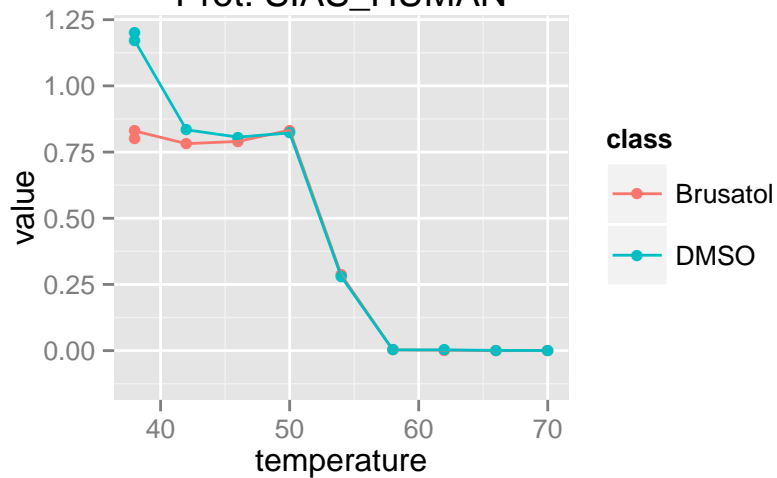

Prot: SIN3A\_HUMAN

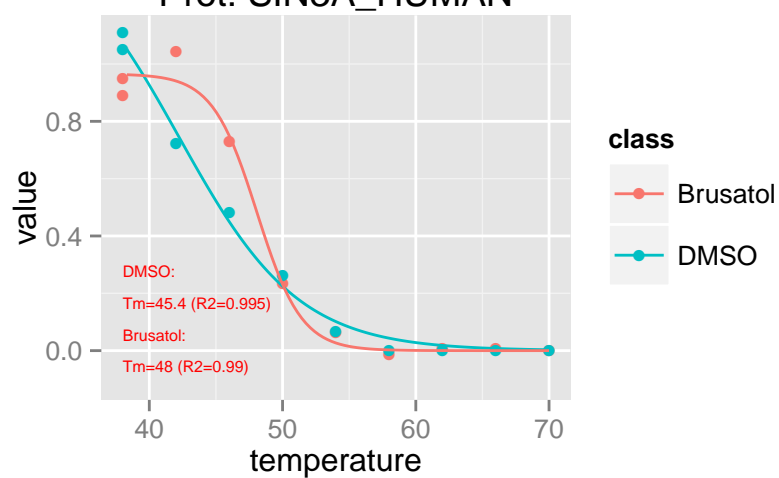

Prot: SIRT1\_HUMAN

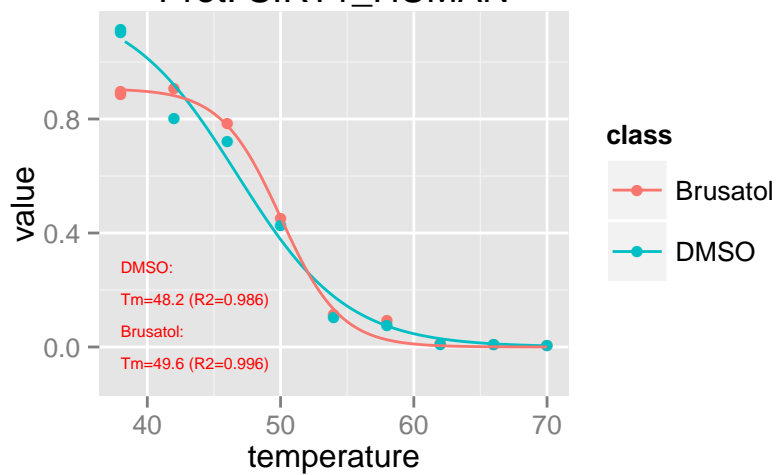

Prot: SIRT3\_HUMAN

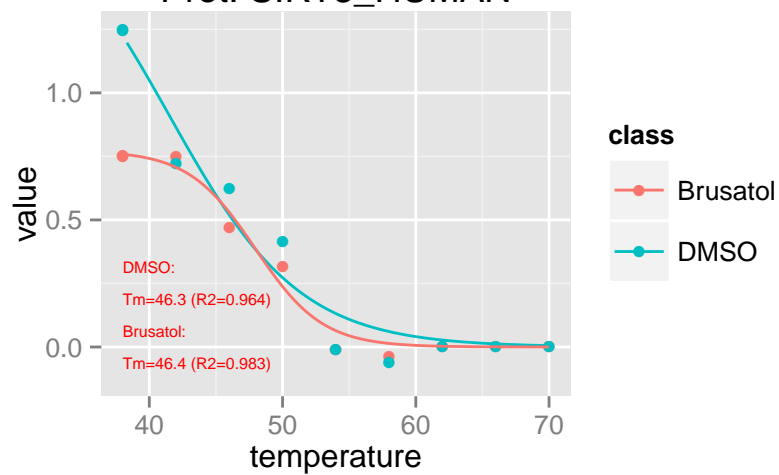

Prot: SK2L2\_HUMAN

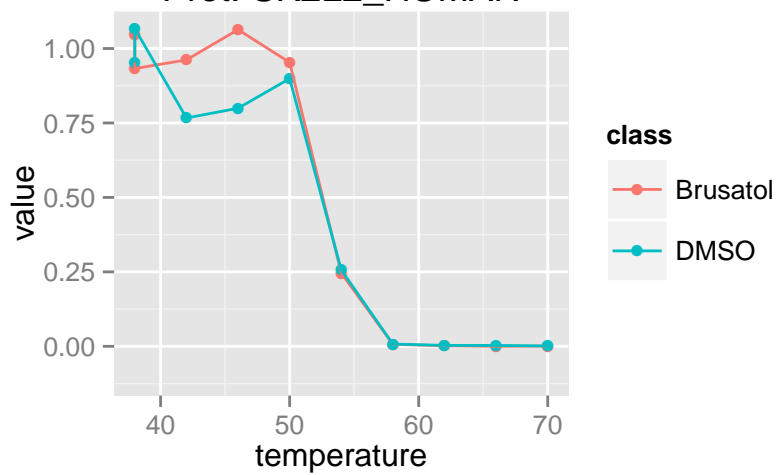

Prot: SKA3\_HUMAN

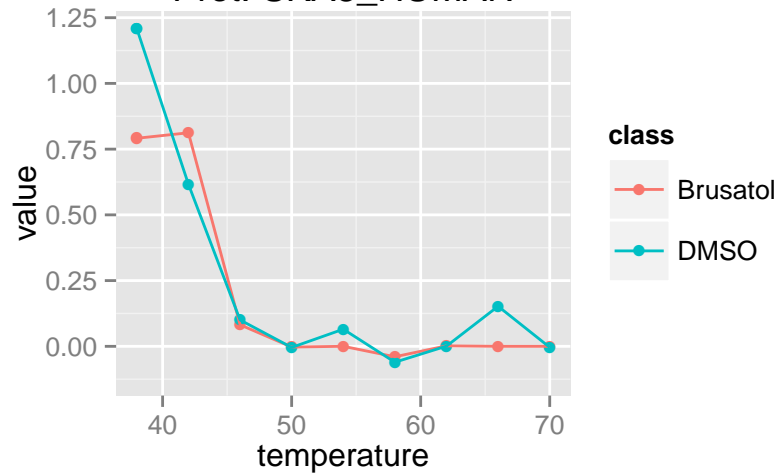

Prot: SKIV2\_HUMAN

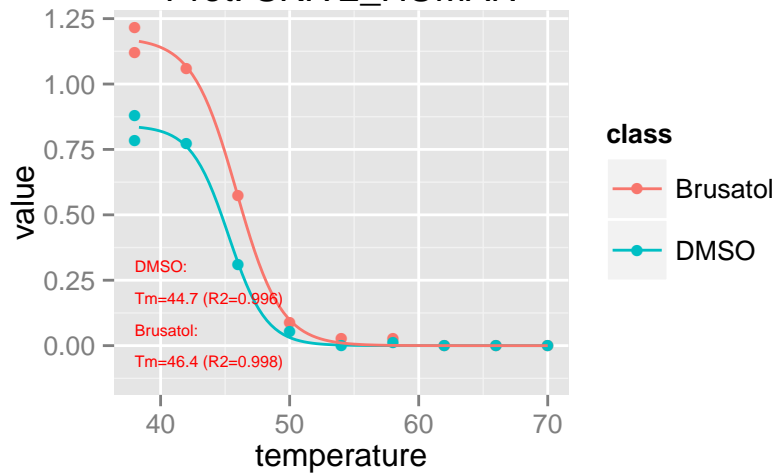

Prot: SKP1\_HUMAN

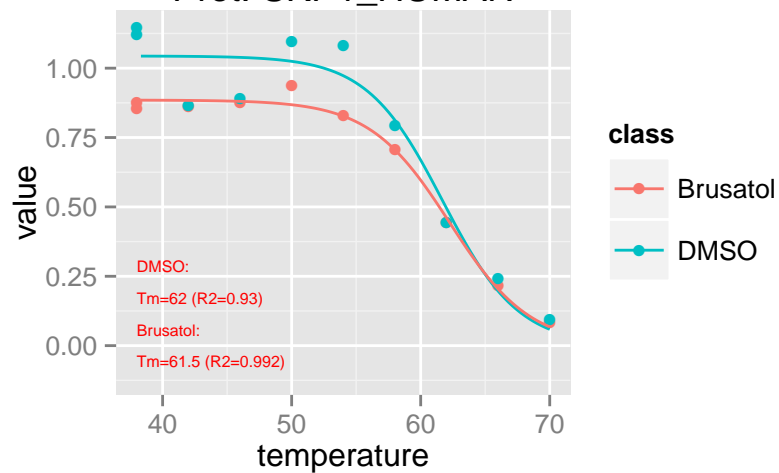

Prot: SLAI2\_HUMAN

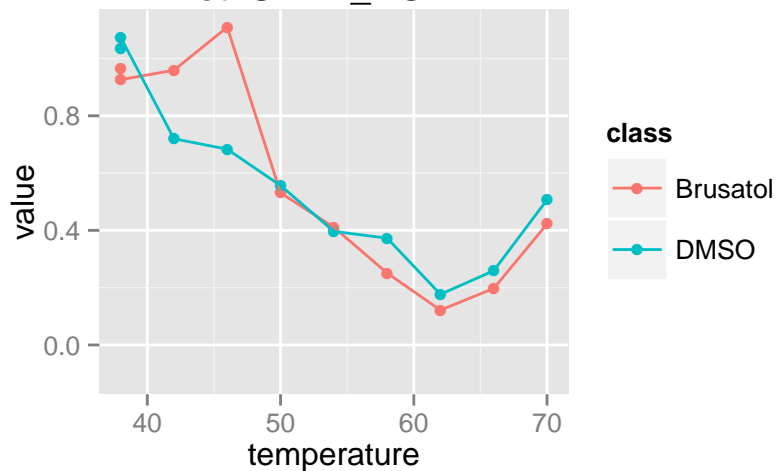

Prot: SLD5\_HUMAN

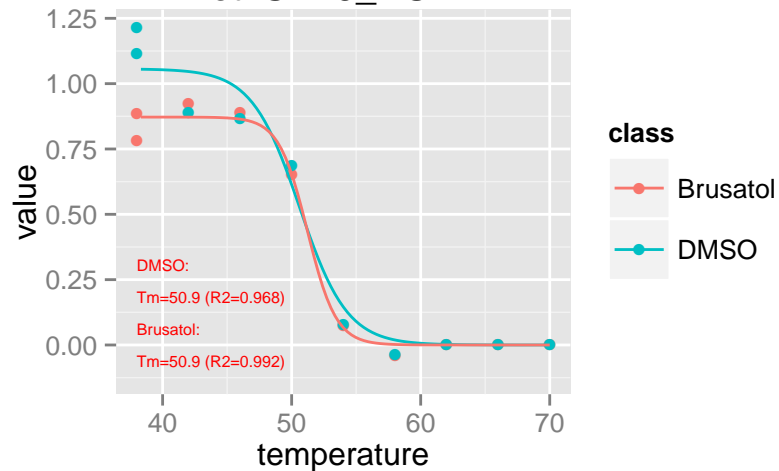

Prot: SLIRP\_HUMAN

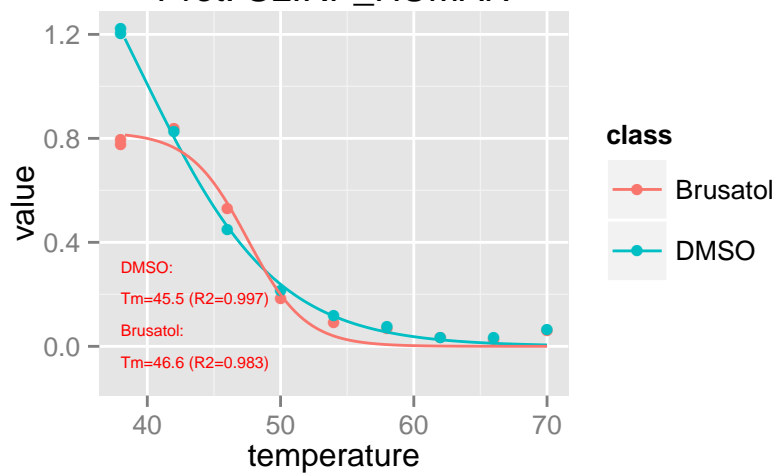

Prot: SLK\_HUMAN

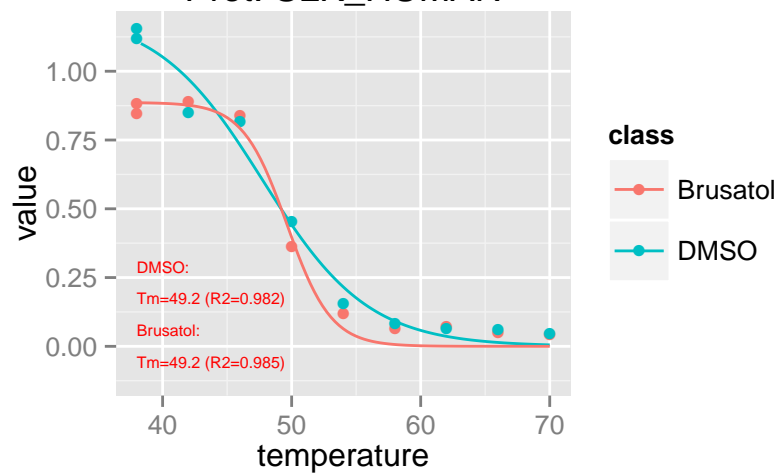

Prot: SLTM\_HUMAN

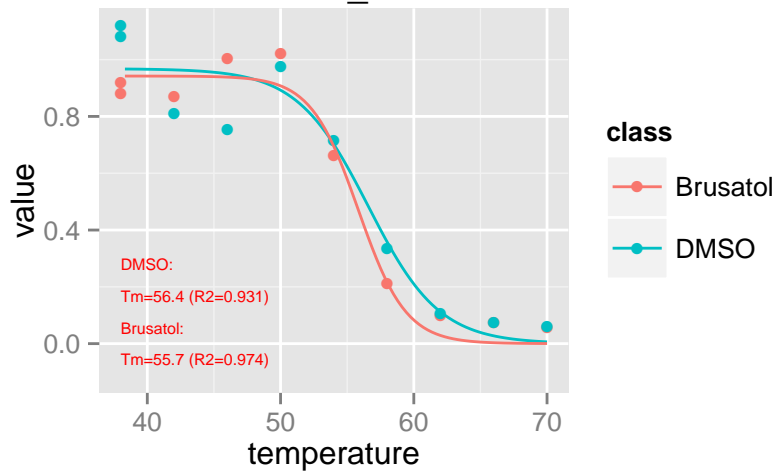

Prot: SMAD1\_HUMAN

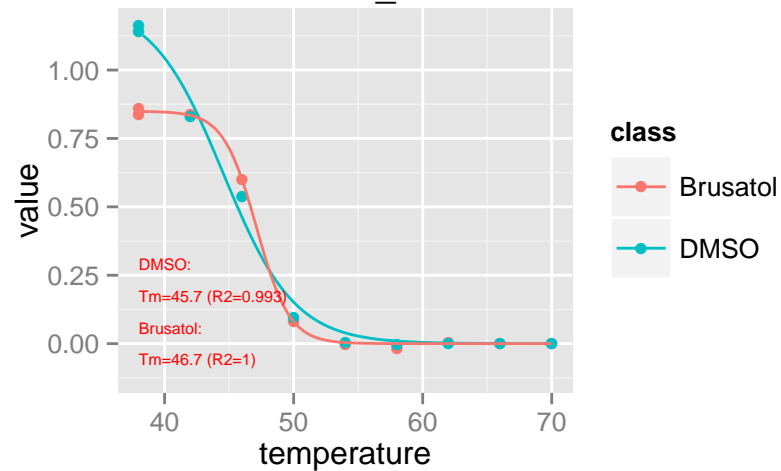

Prot: SMAD2\_HUMAN

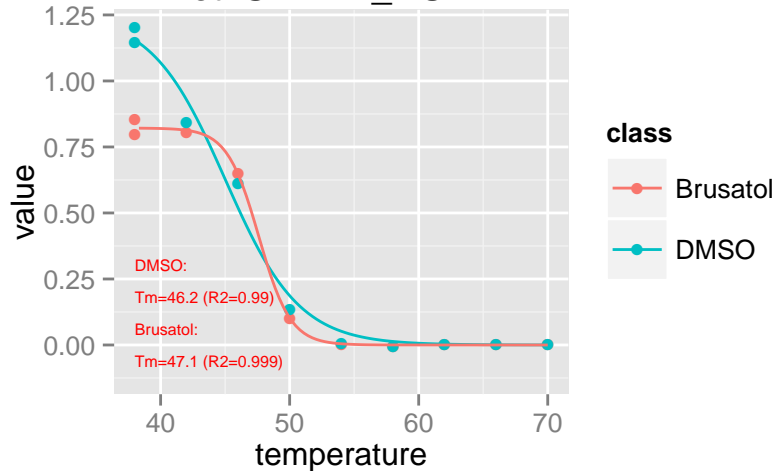

Prot: SMAD3\_HUMAN

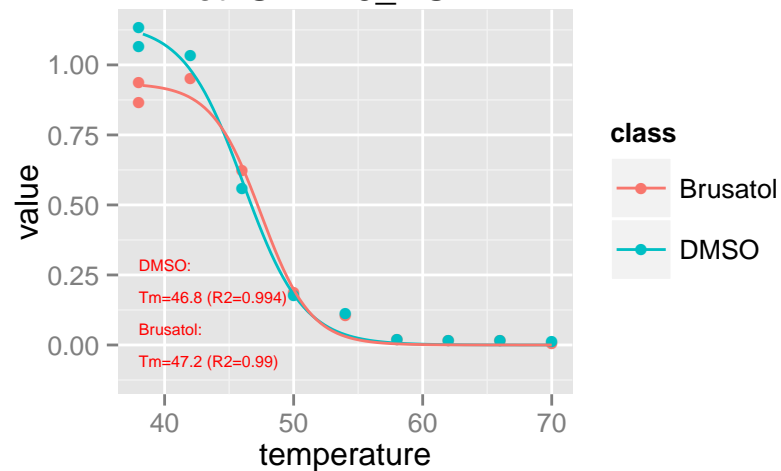

Prot: SMAD4\_HUMAN

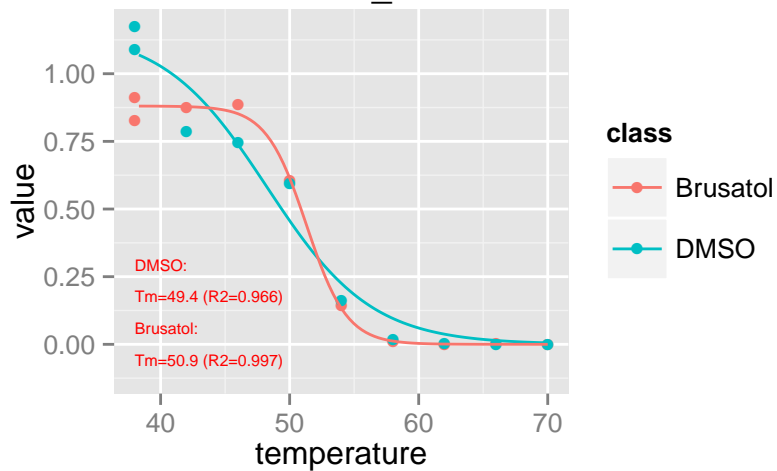

Prot: SMAP\_HUMAN

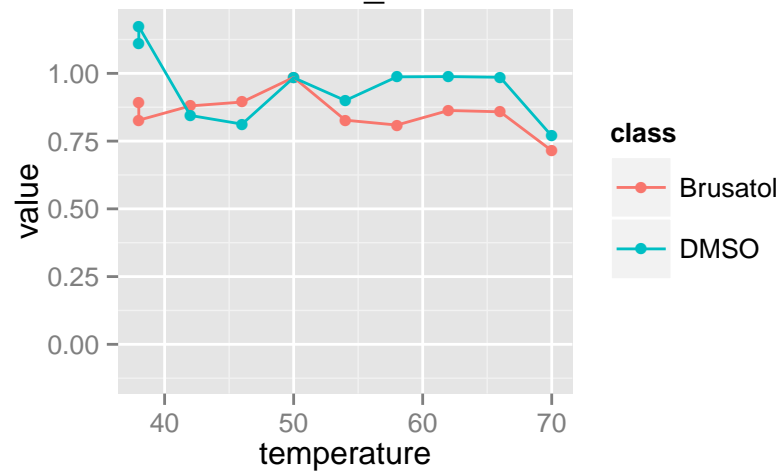

Prot: SMAP1\_HUMAN

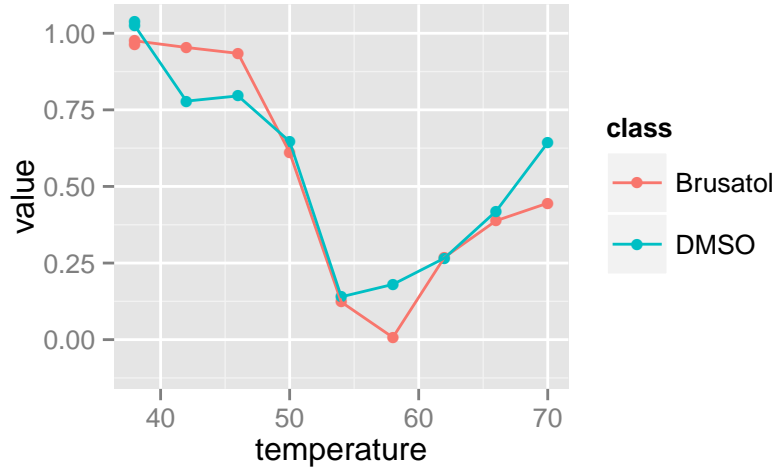

Prot: SMC1A\_HUMAN

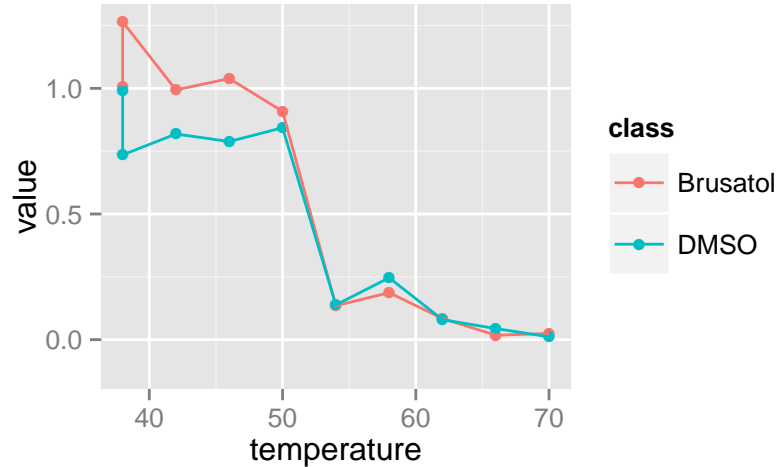

Prot: SMC2\_HUMAN

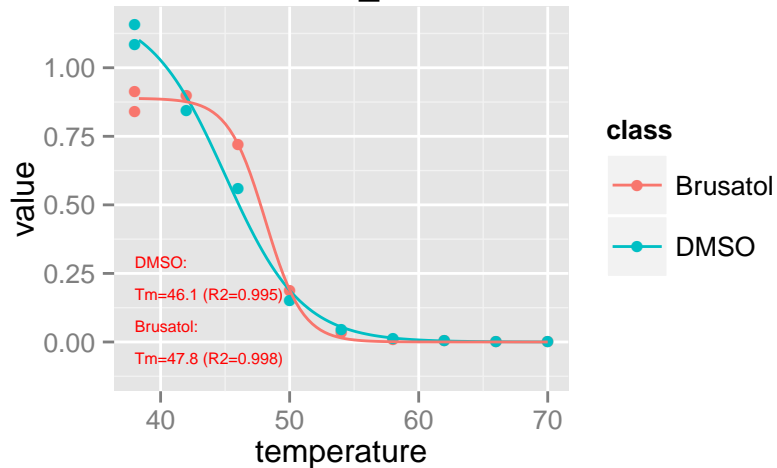

Prot: SMC3\_HUMAN

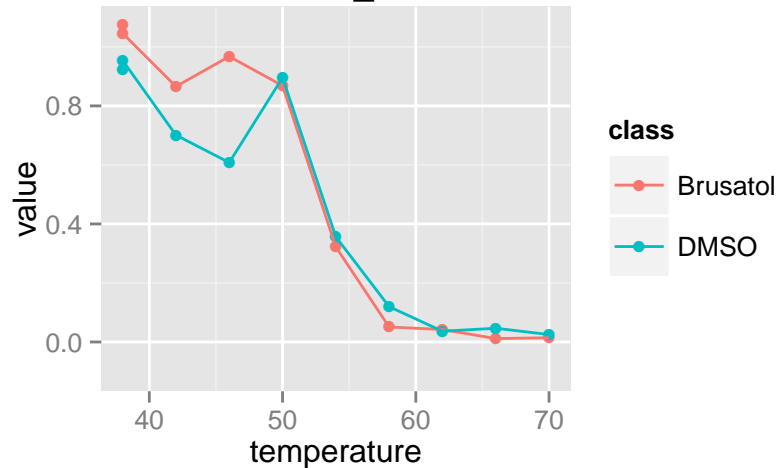

Prot: SMC4\_HUMAN

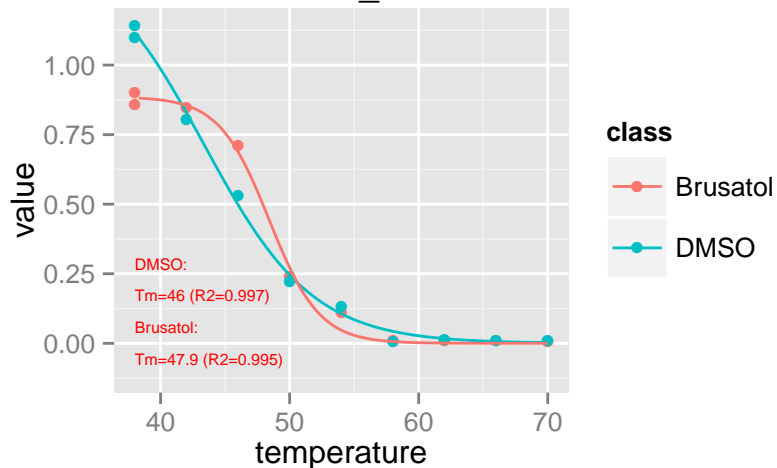

Prot: SMCA1\_HUMAN

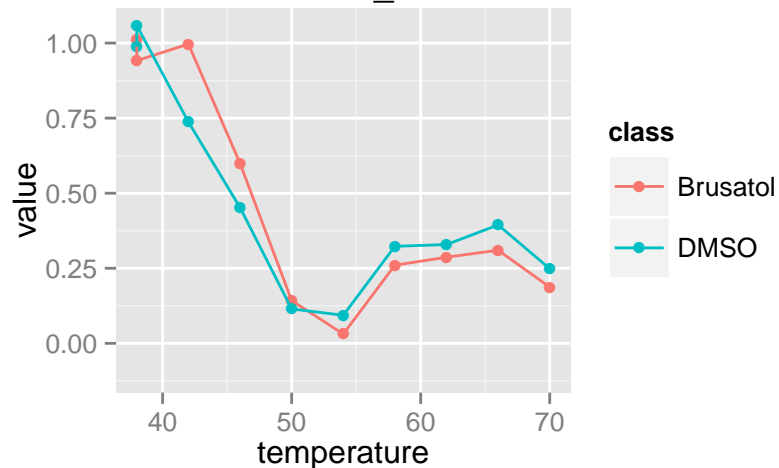

Prot: SMCE1\_HUMAN

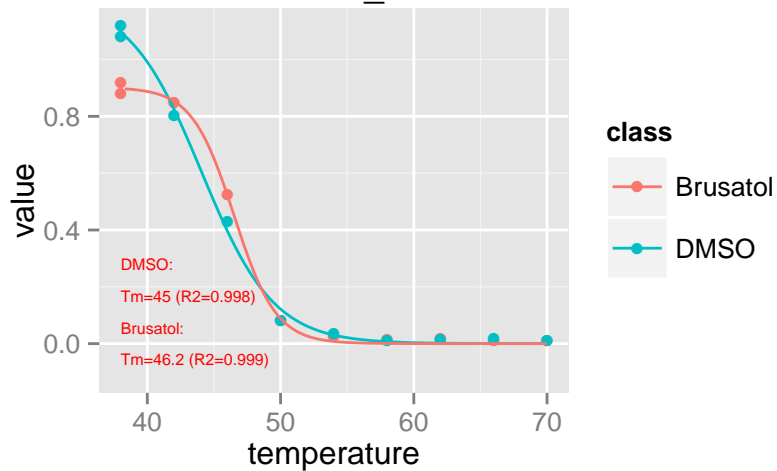

Prot: SMD1\_HUMAN

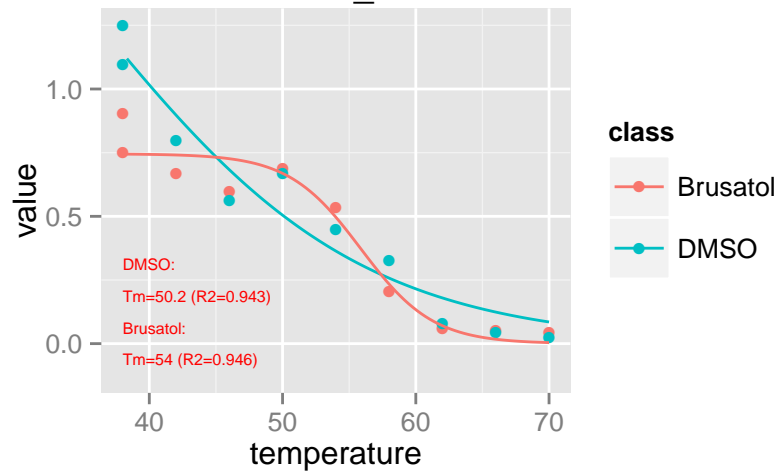

Prot: SMD2\_HUMAN

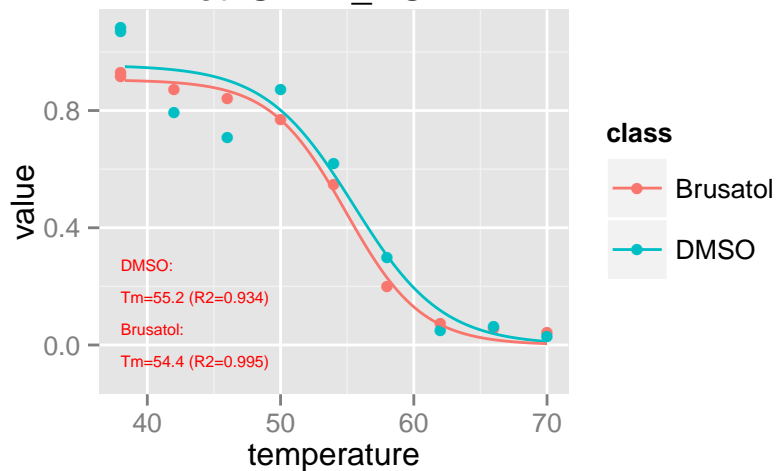

Prot: SMD3\_HUMAN

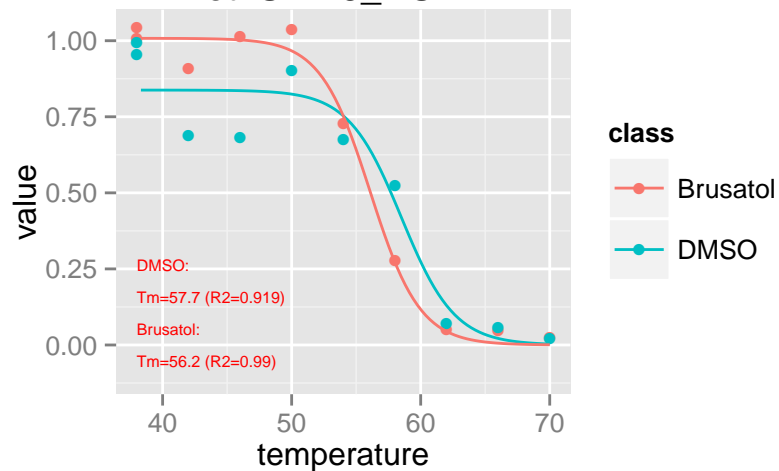

Prot: SMN\_HUMAN

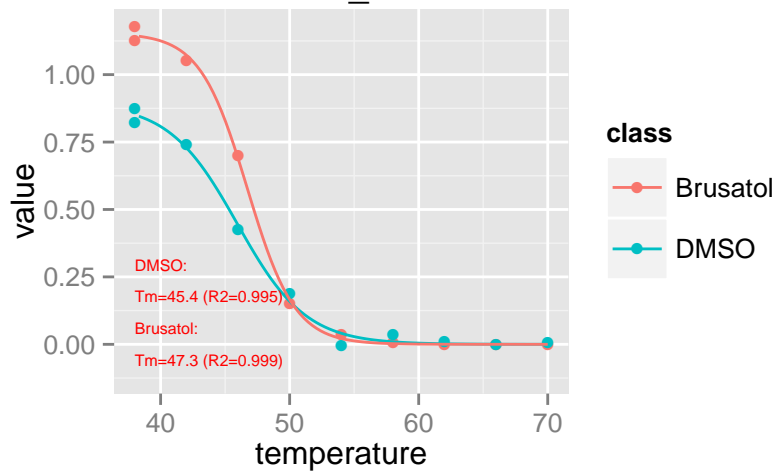

Prot: SMRC1\_HUMAN

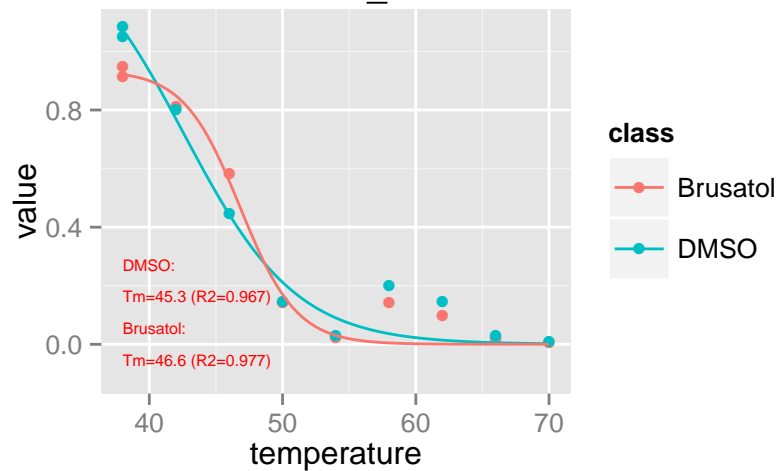

Prot: SMRC2\_HUMAN

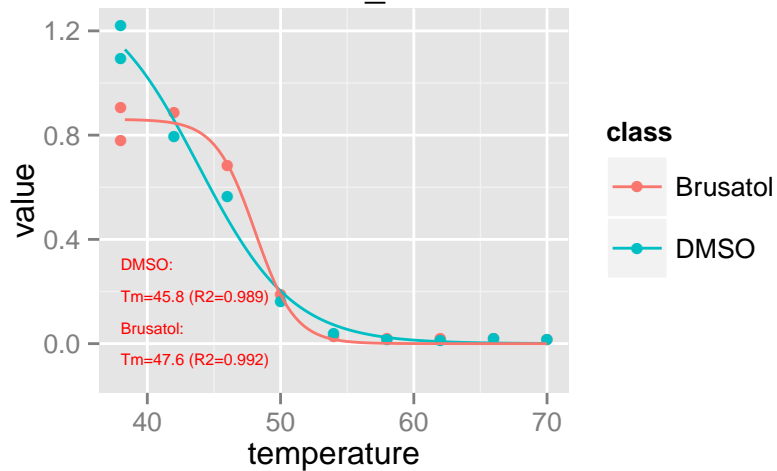

Prot: SMRCD\_HUMAN

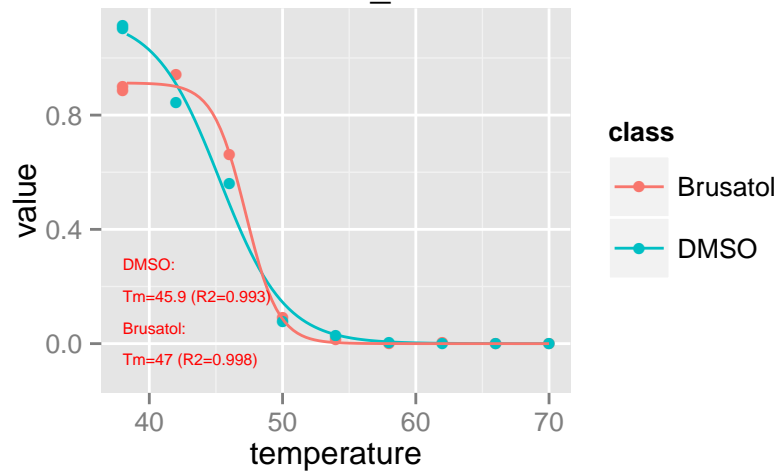

Prot: SMU1\_HUMAN

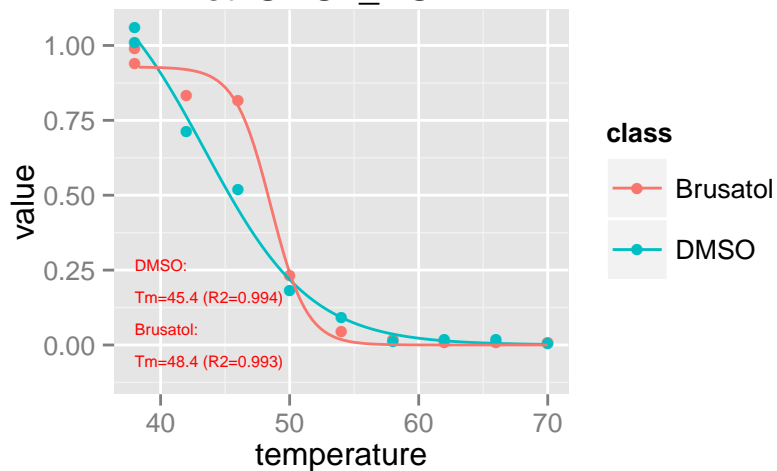

Prot: SMYD5\_HUMAN

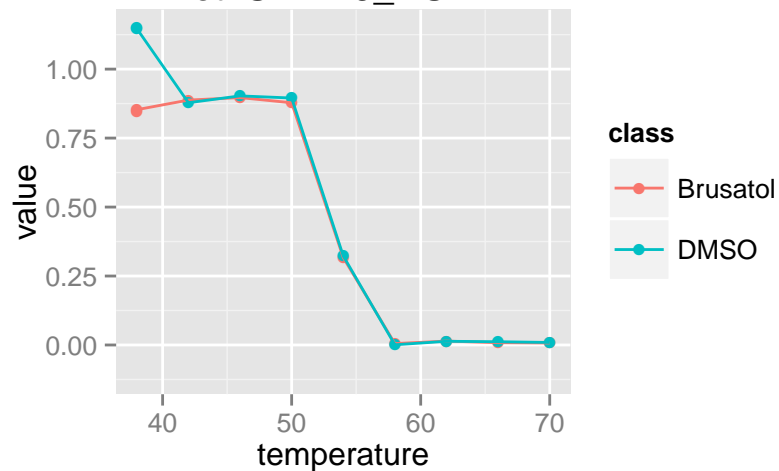

Prot: SNAA\_HUMAN

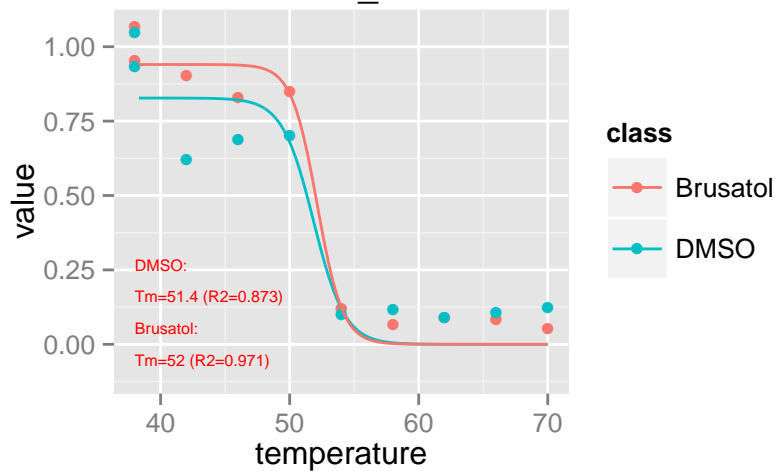

Prot: SNAPN\_HUMAN

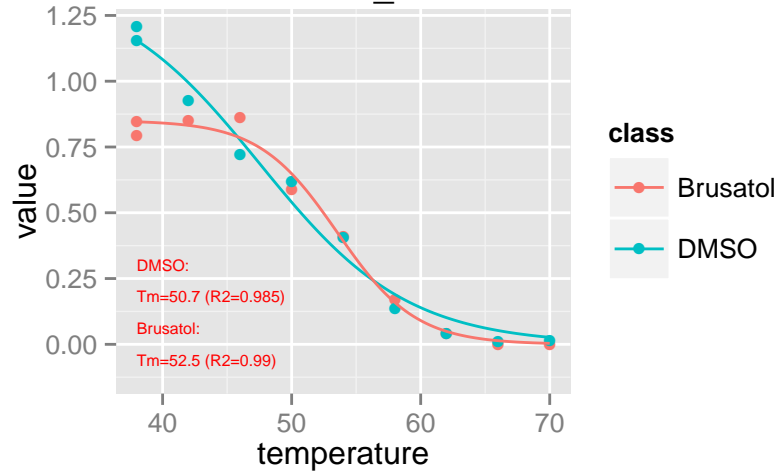

Prot: SND1\_HUMAN

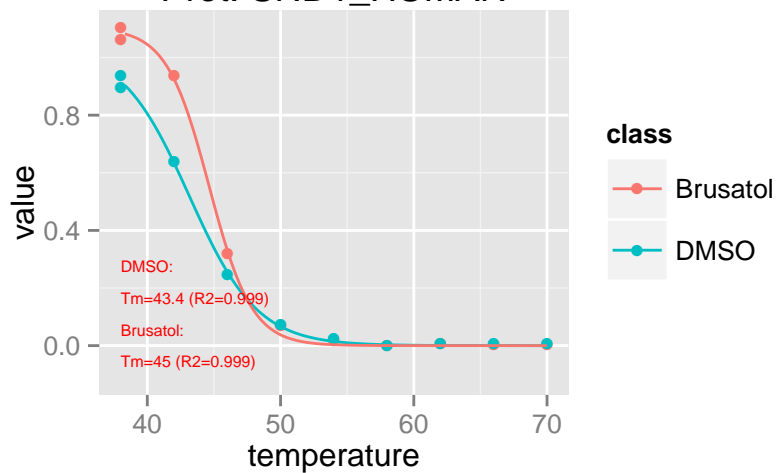

Prot: SNF5\_HUMAN

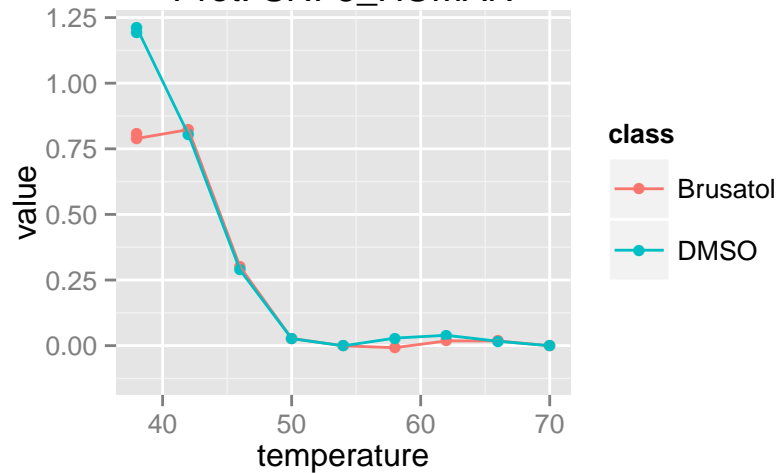

Prot: SNF8\_HUMAN

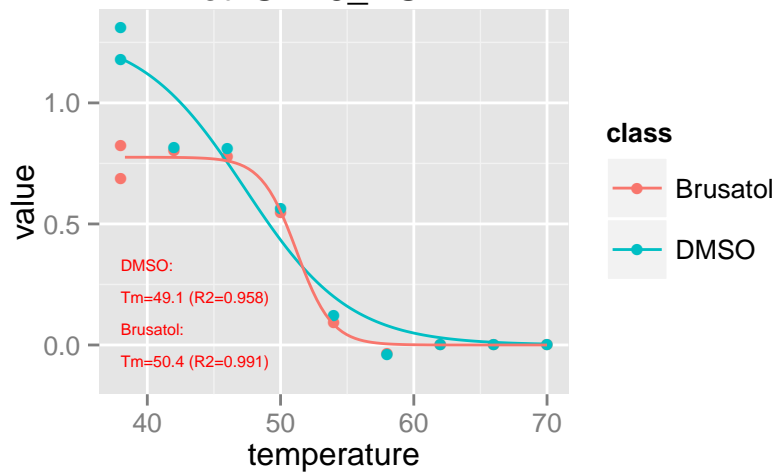

Prot: SNP29\_HUMAN

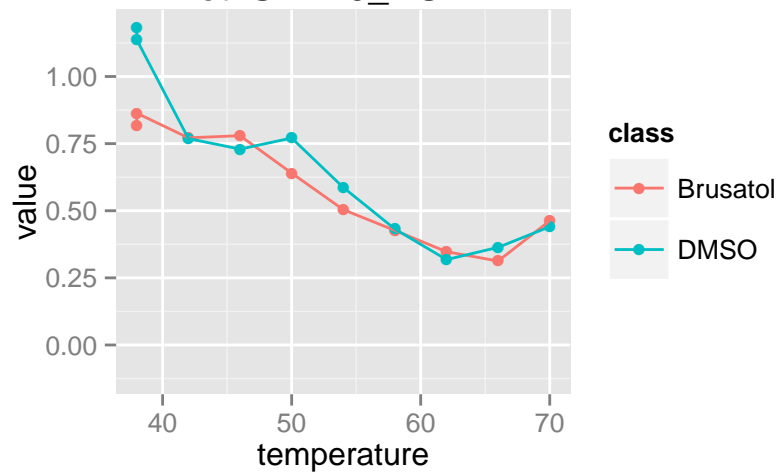

Prot: SNRPA\_HUMAN

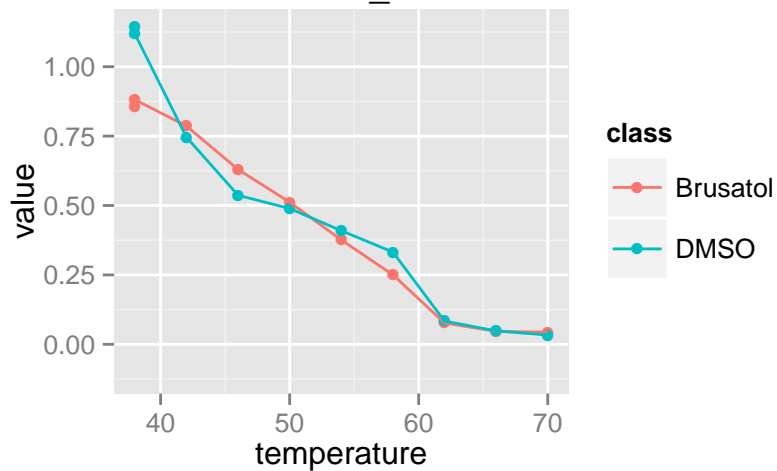

Prot: SNUT1\_HUMAN

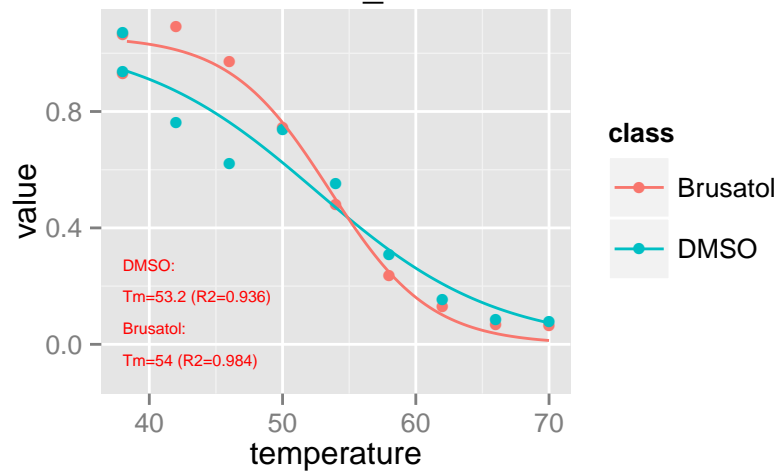

Prot: SNUT2\_HUMAN

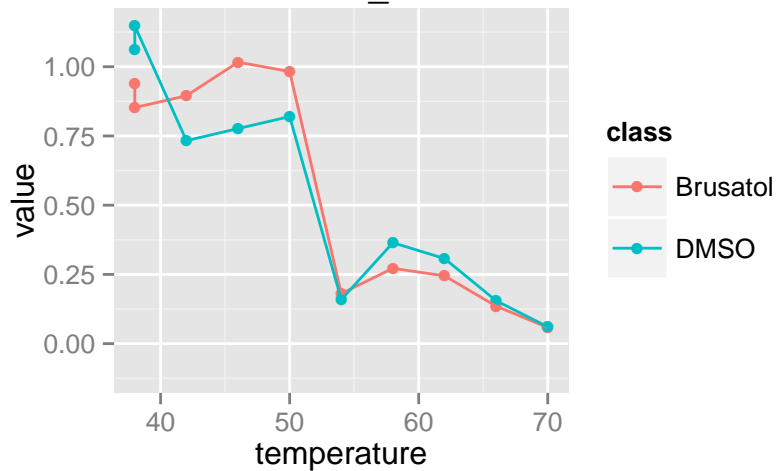

Prot: SNW1\_HUMAN

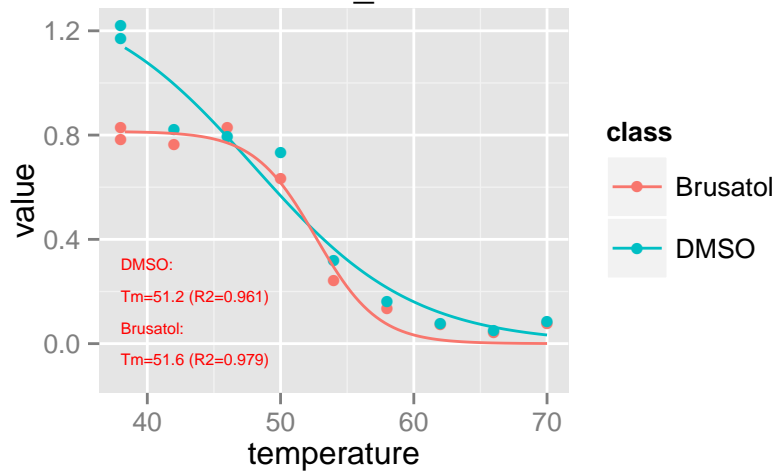

Prot: SNX1\_HUMAN

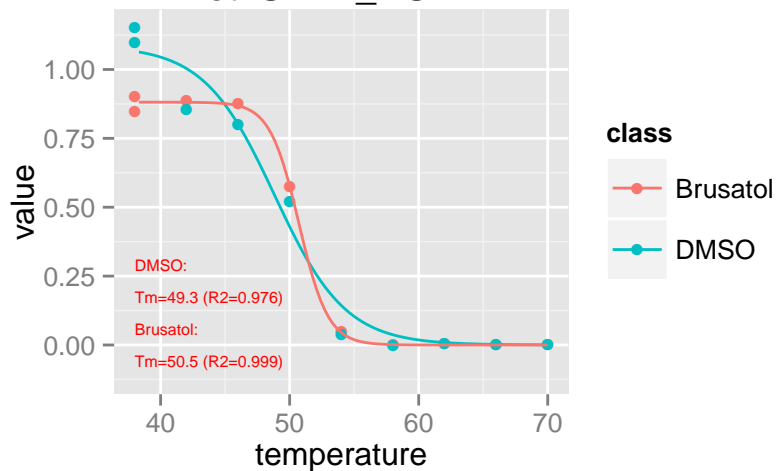

Prot: SNX12\_HUMAN

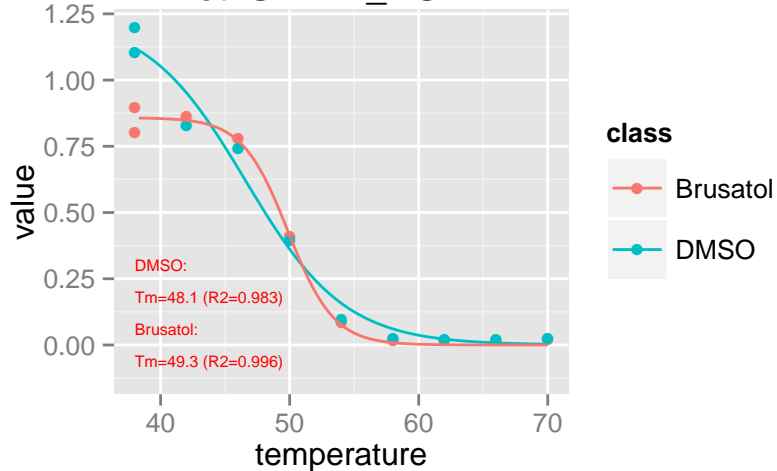

Prot: SNX17\_HUMAN

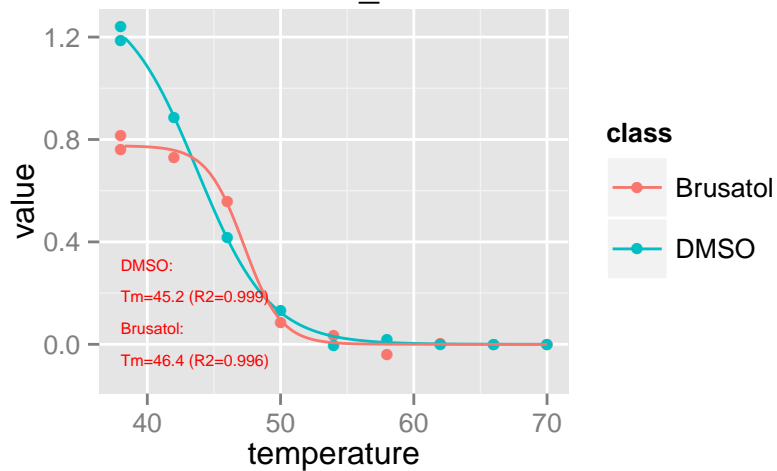

Prot: SNX2\_HUMAN

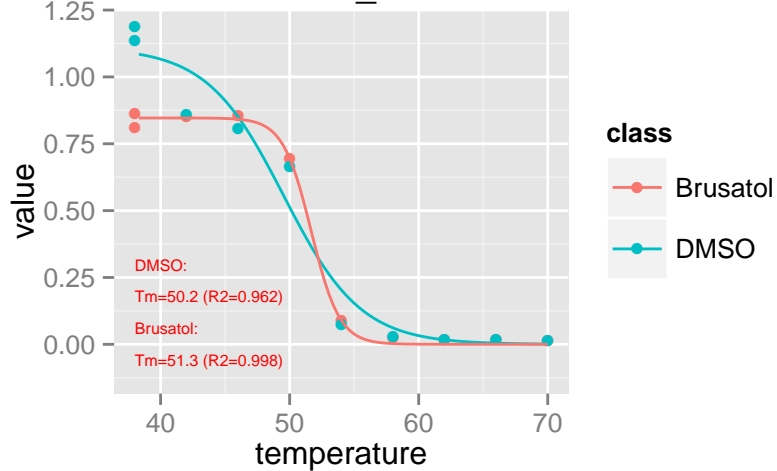



Prot: SNX27\_HUMAN

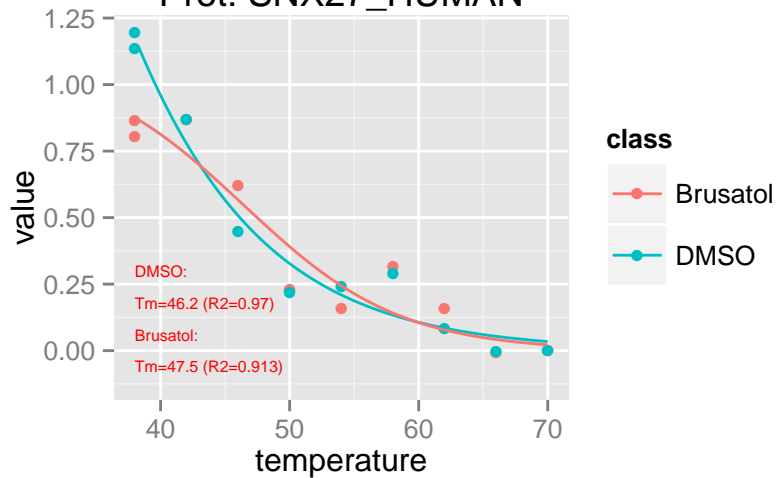

Prot: SNX3\_HUMAN

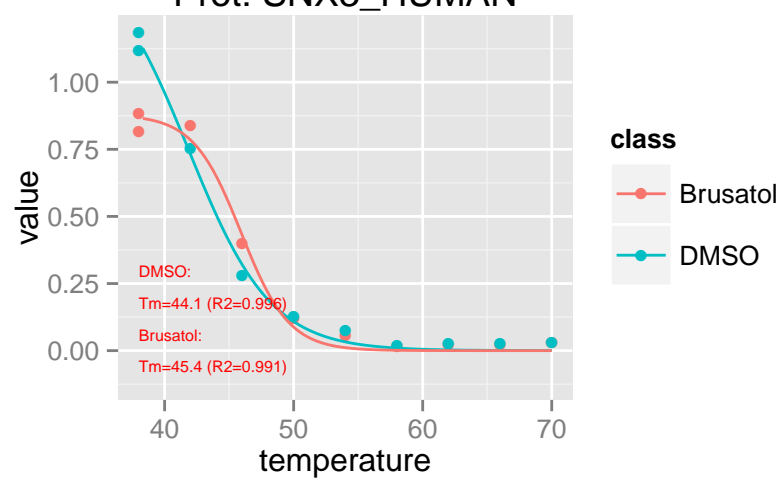

Prot: SNX4\_HUMAN

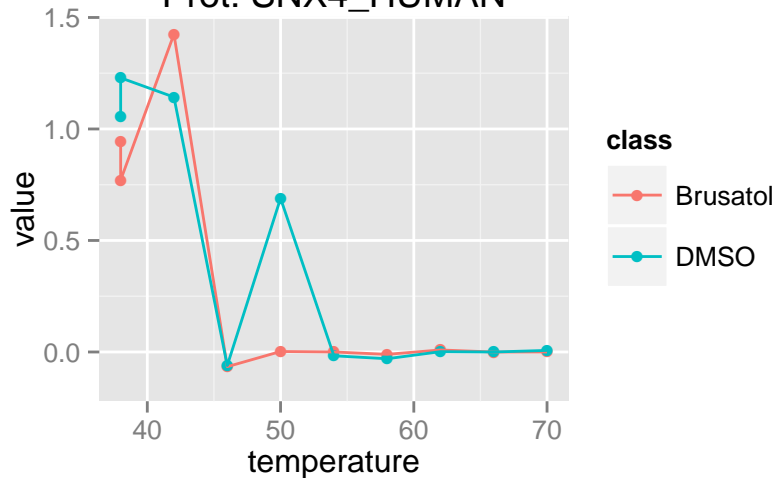

Prot: SNX5\_HUMAN

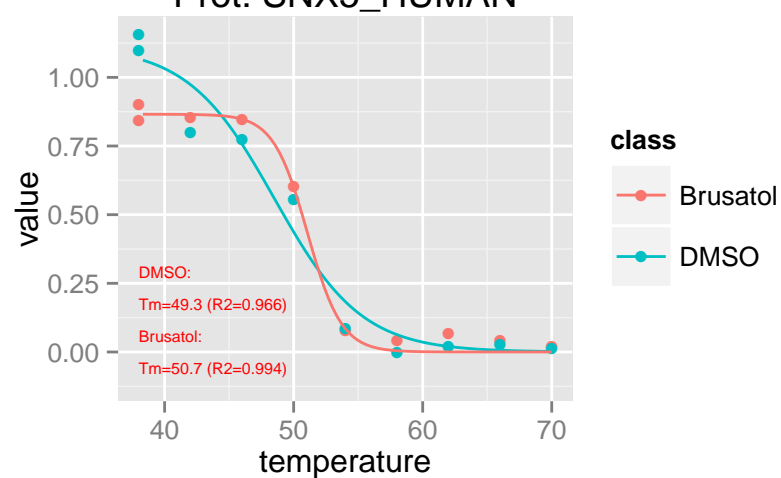

Prot: SNX6\_HUMAN

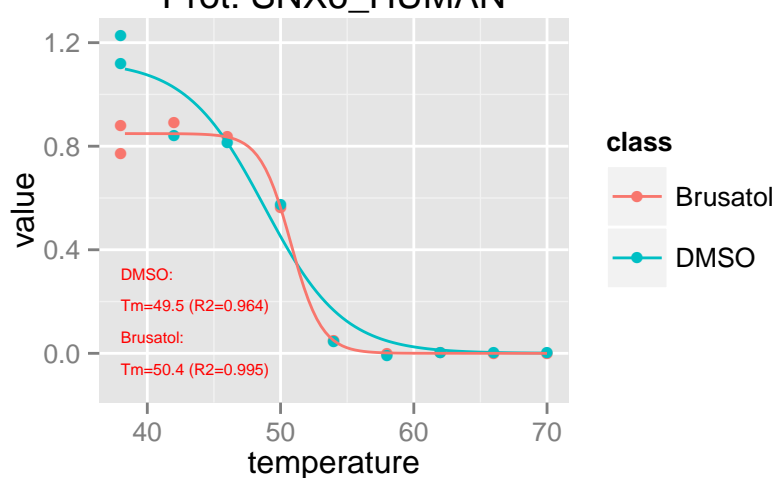

Prot: SNX8\_HUMAN

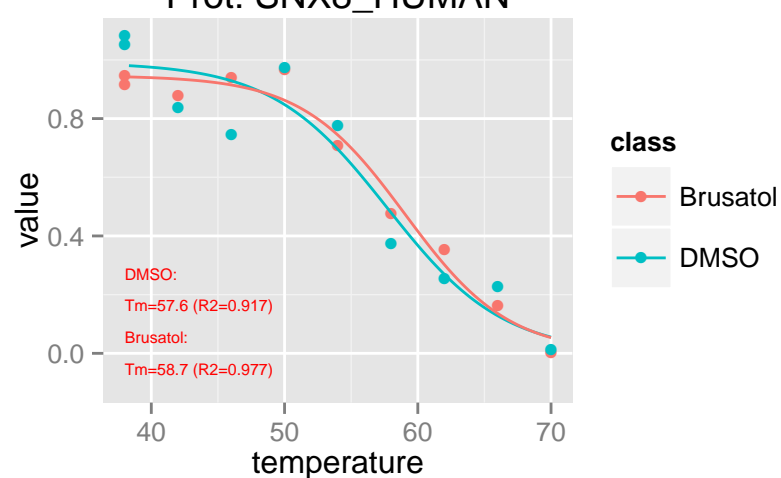

Prot: SNX9\_HUMAN

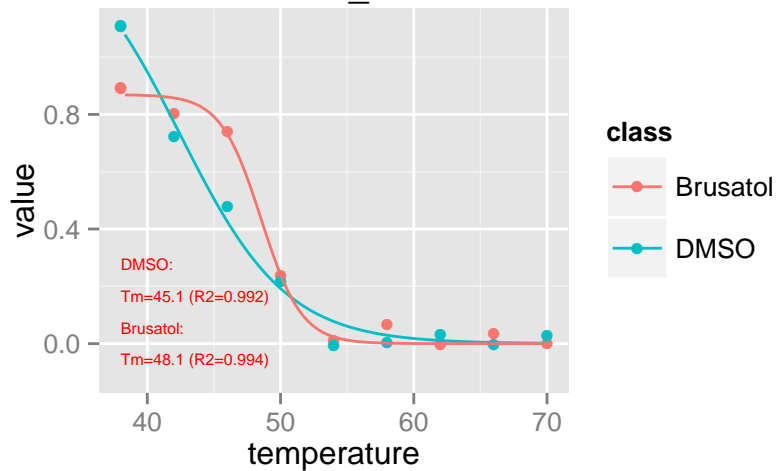

Prot: SODC\_HUMAN

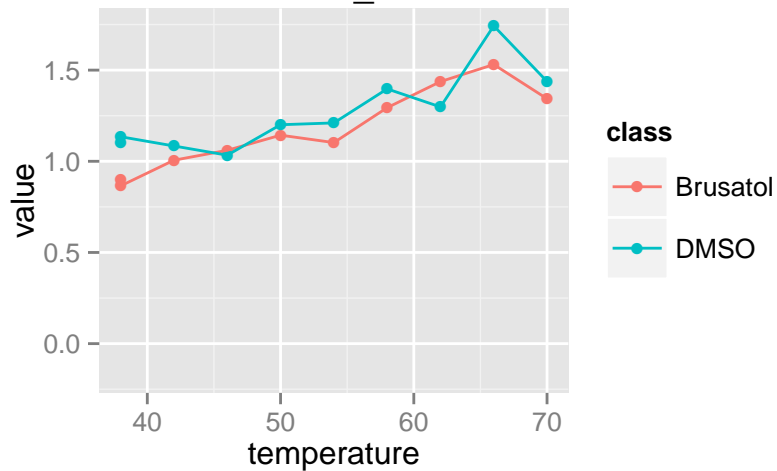

Prot: SORCN\_HUMAN

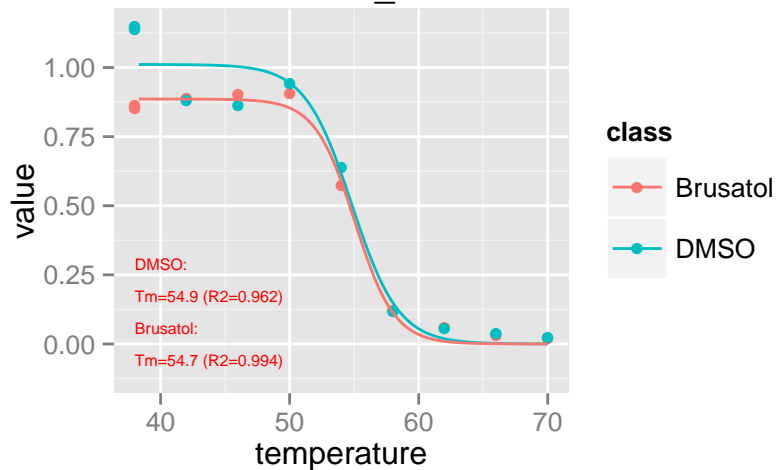

Prot: SP1\_HUMAN

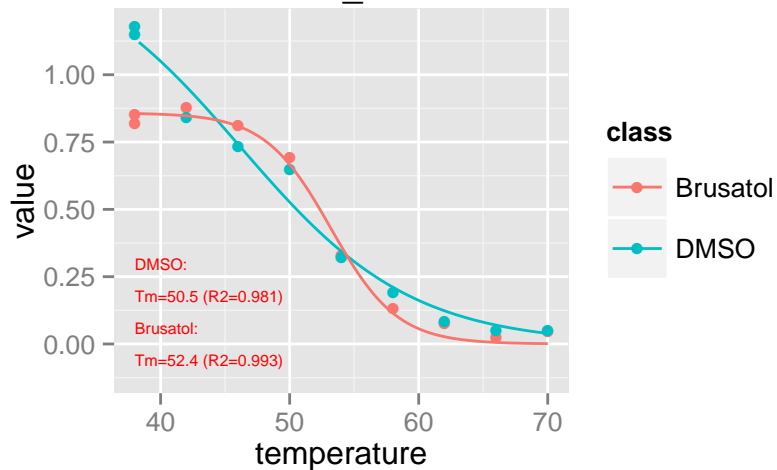

Prot: SP17\_HUMAN

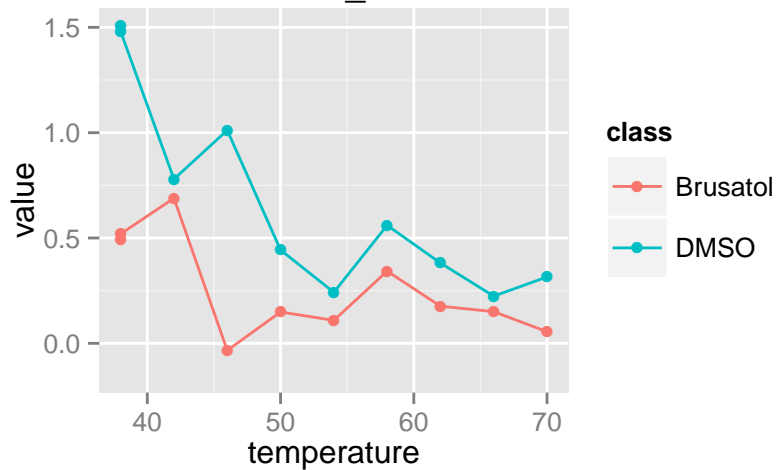

Prot: SP3\_HUMAN

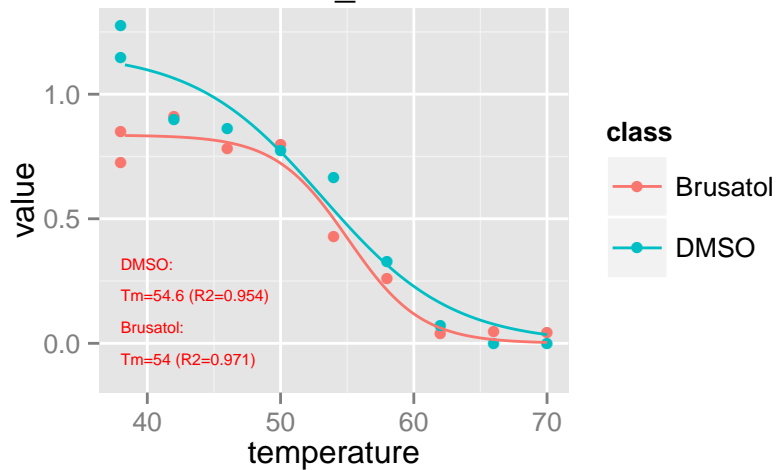

Prot: SPAG1\_HUMAN

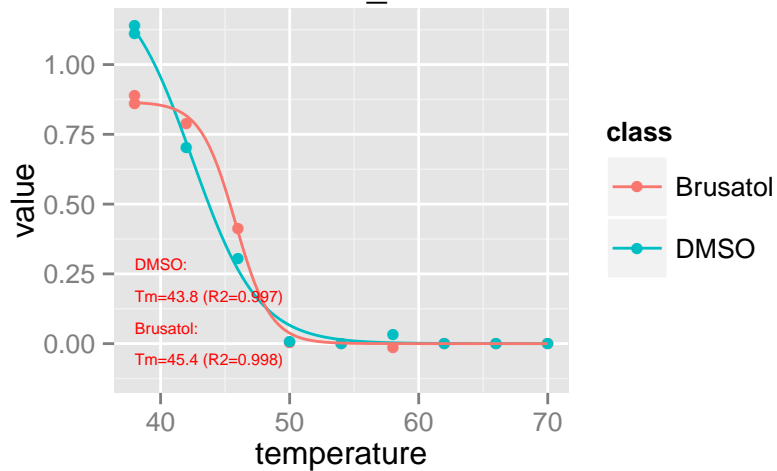

Prot: SPAG7\_HUMAN

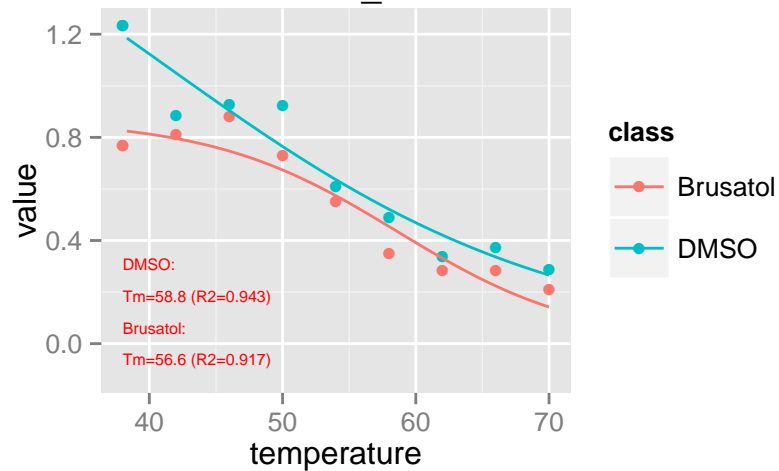

Prot: SPAS2\_HUMAN

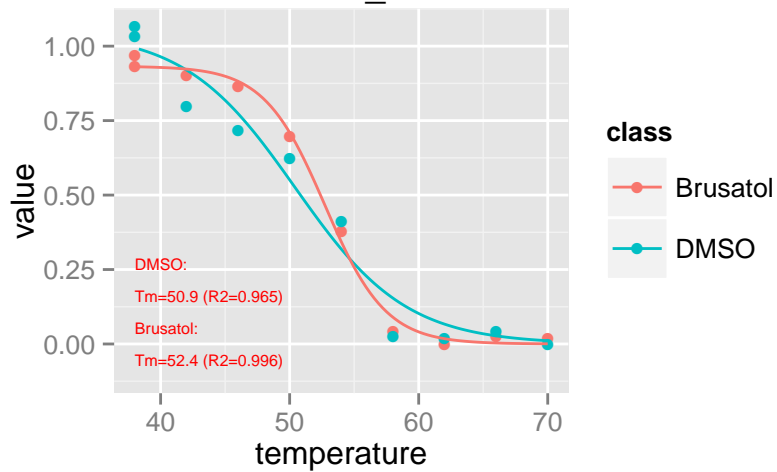

Prot: SPAST\_HUMAN

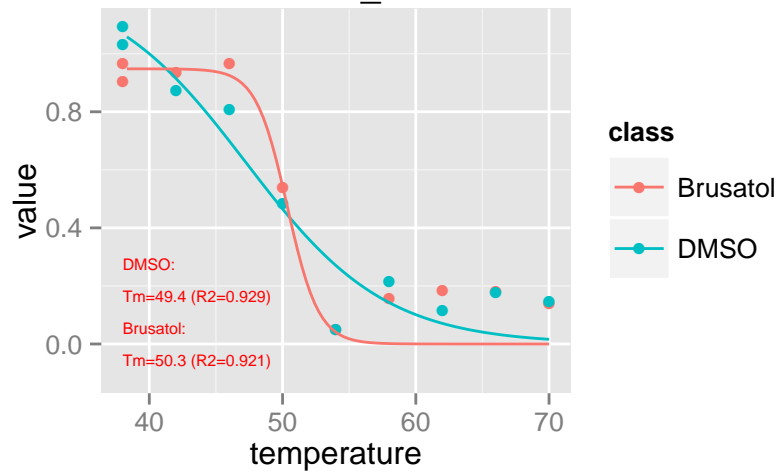

Prot: SPAT5\_HUMAN

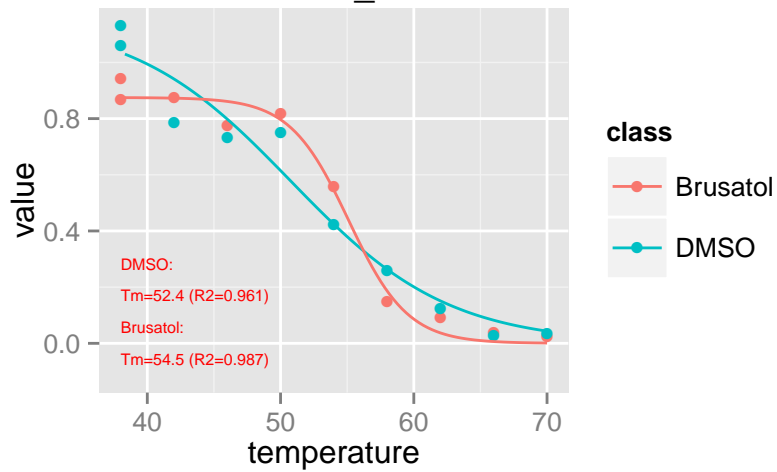

Prot: SPB6\_HUMAN

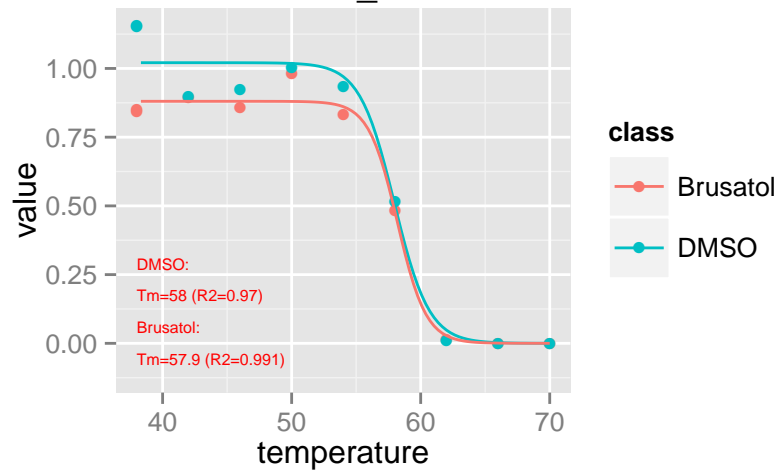

Prot: SPB9\_HUMAN

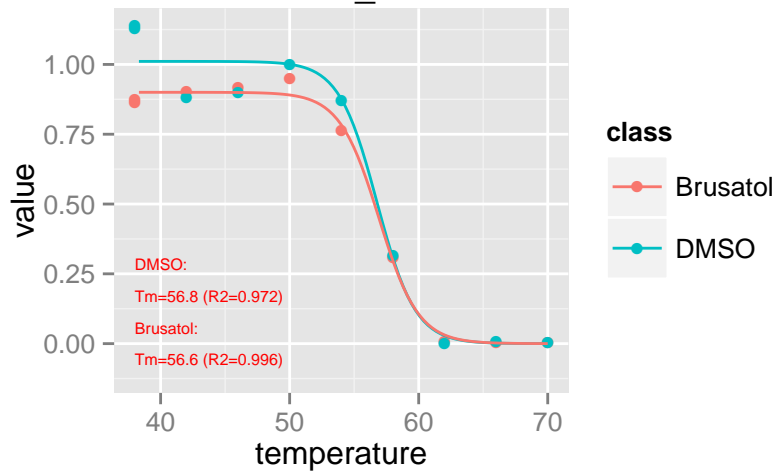

Prot: SPC24\_HUMAN

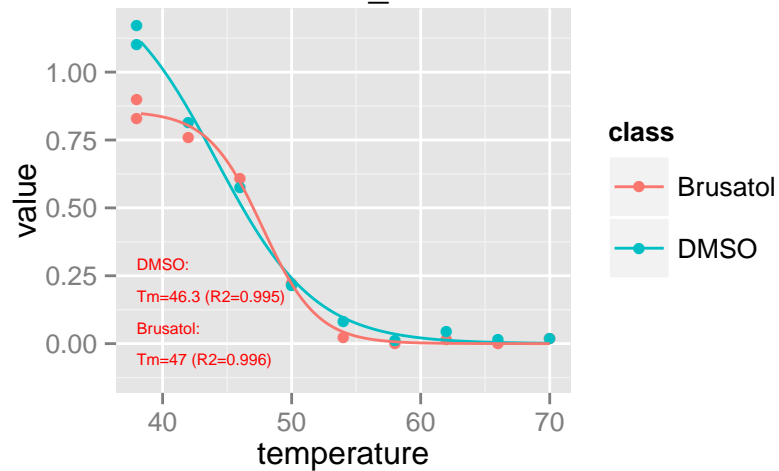

Prot: SPC25\_HUMAN

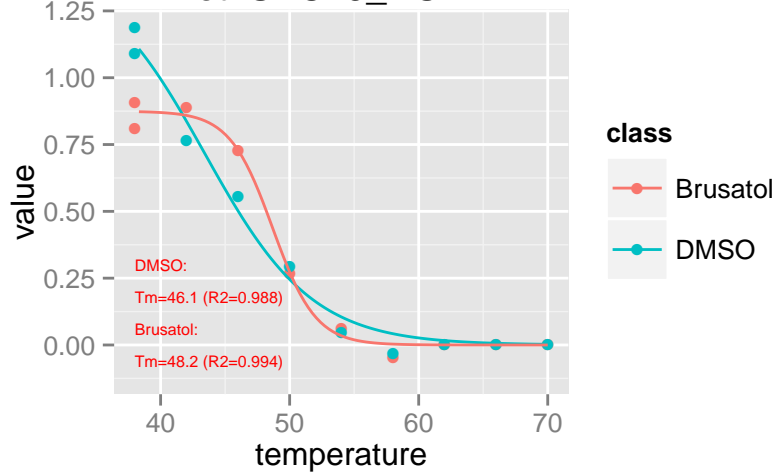

Prot: SPD2B\_HUMAN

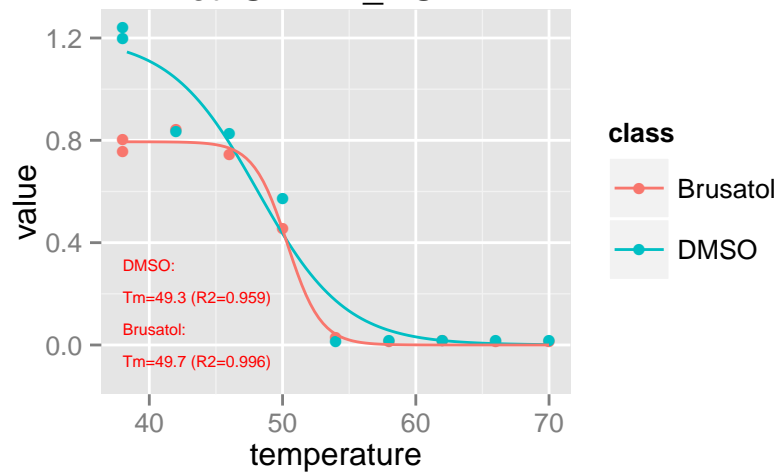

Prot: SPDLY\_HUMAN

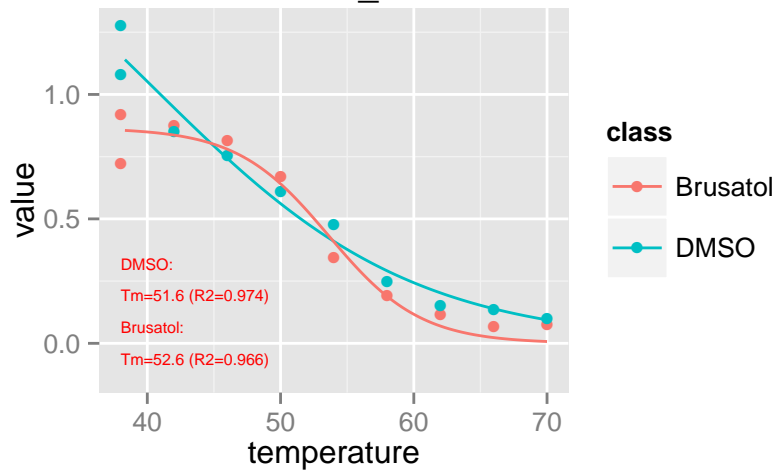

Prot: SPEB\_HUMAN

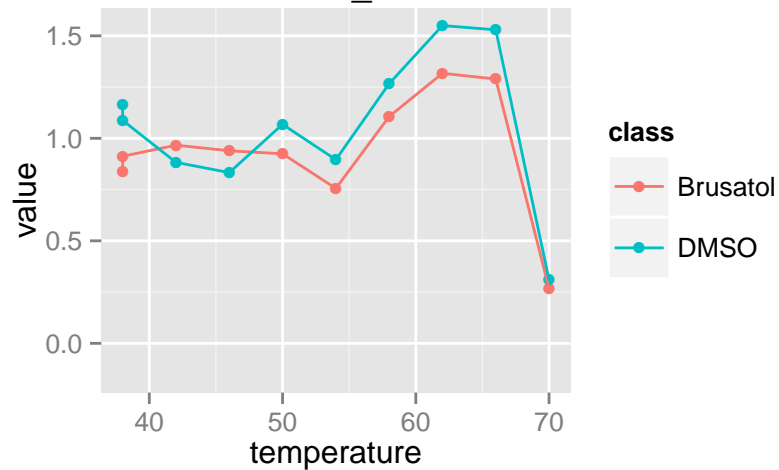

Prot: SPEE\_HUMAN

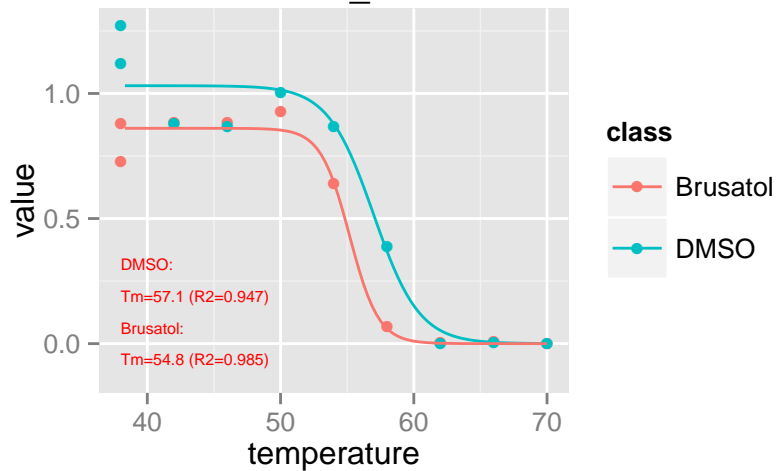

Prot: SPF27\_HUMAN

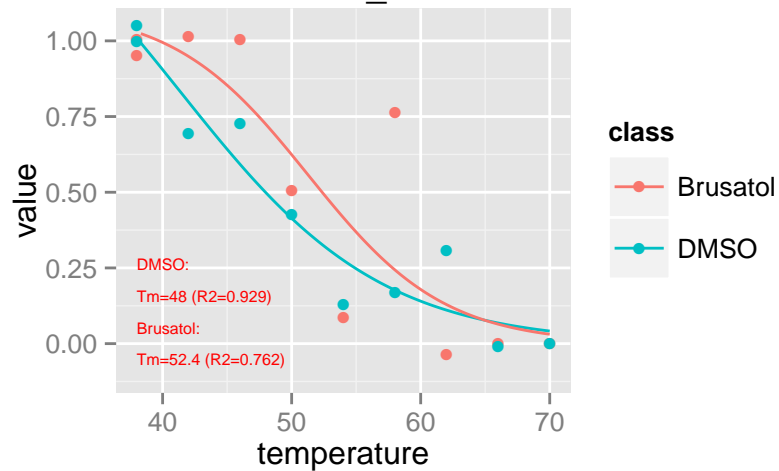

Prot: SPF30\_HUMAN

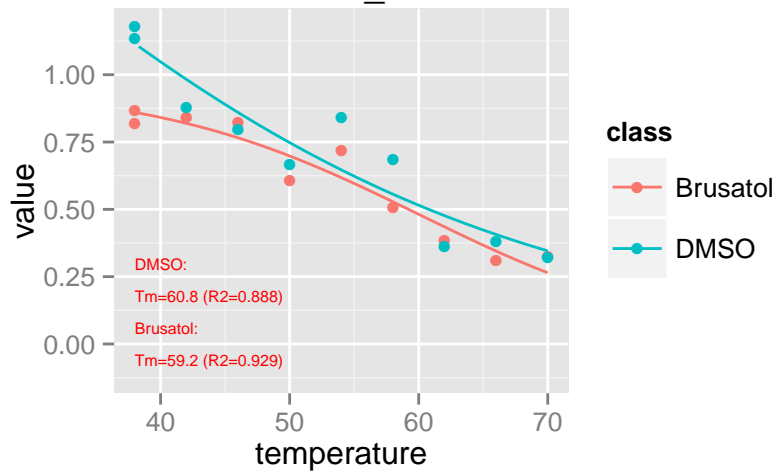

Prot: SPF45\_HUMAN

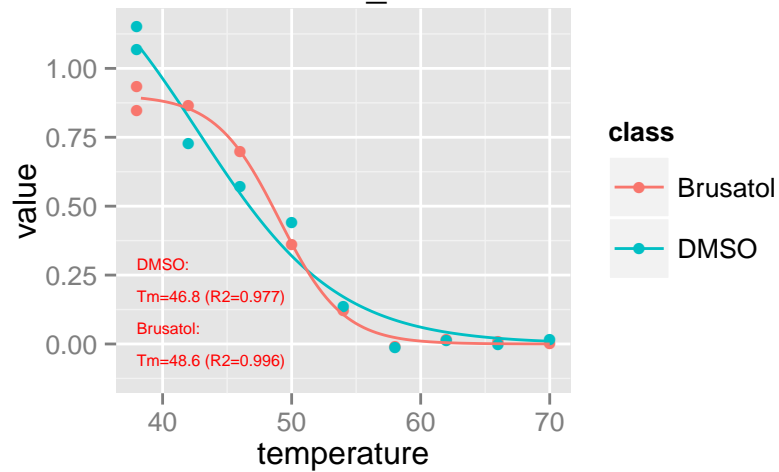

Prot: SPG20\_HUMAN

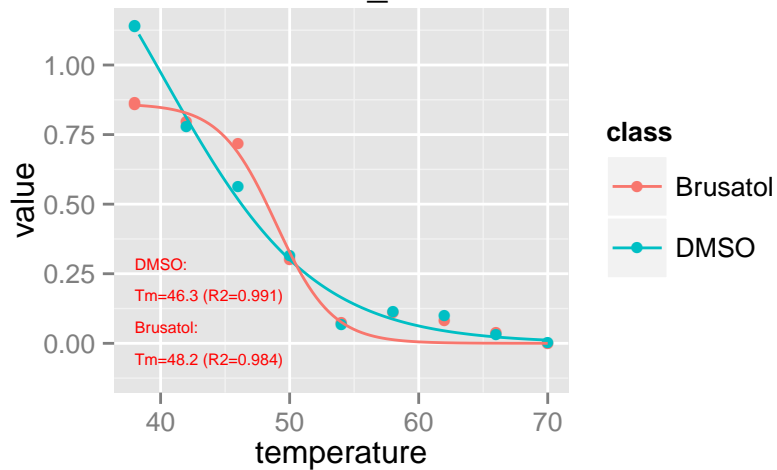

Prot: SPN1\_HUMAN

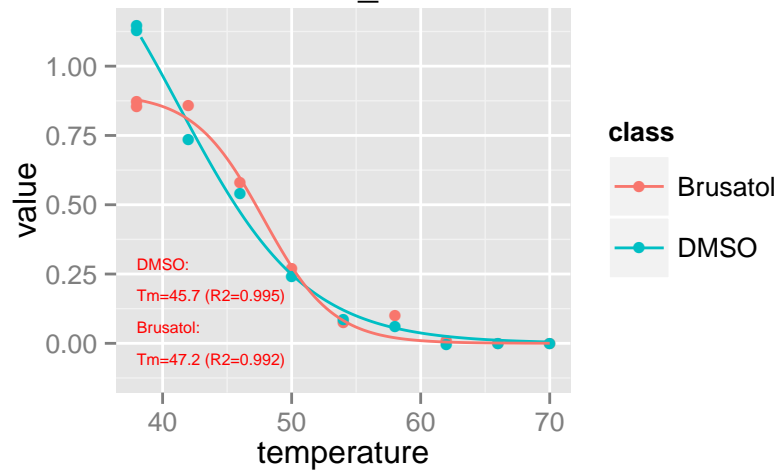

Prot: SPRE\_HUMAN

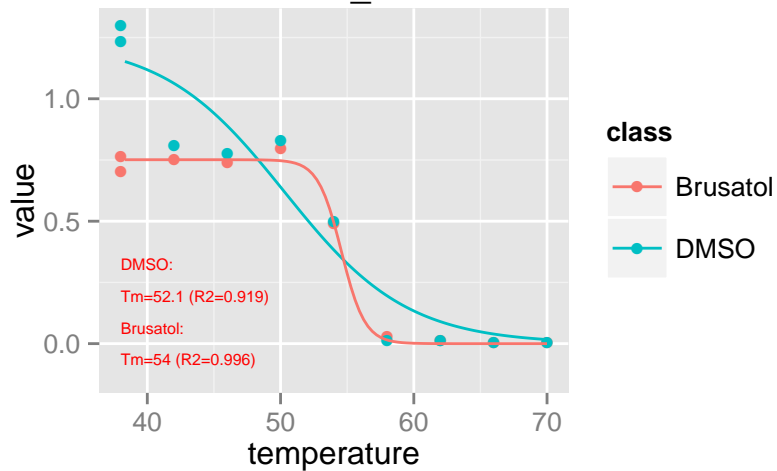

Prot: SPRY4\_HUMAN

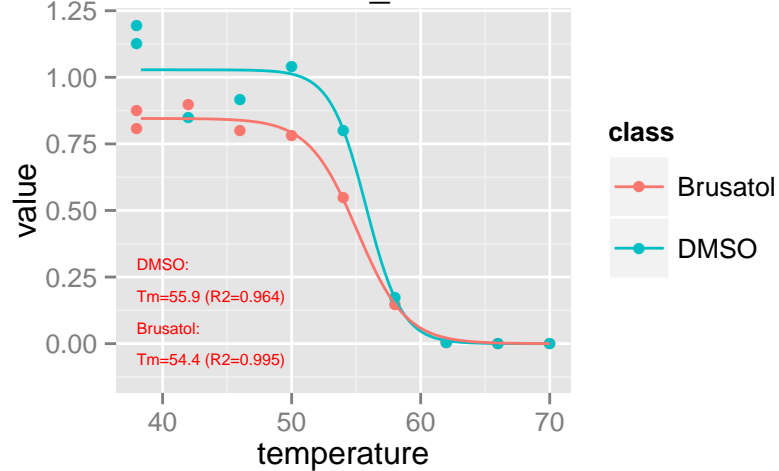

Prot: SPS1\_HUMAN

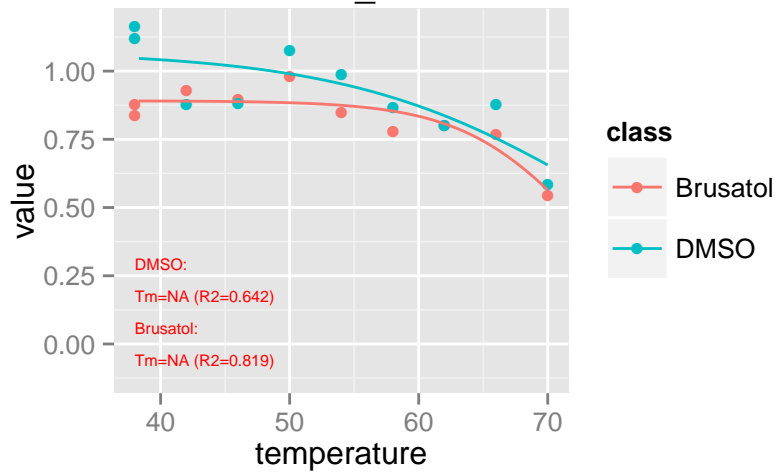

Prot: SPS2\_HUMAN

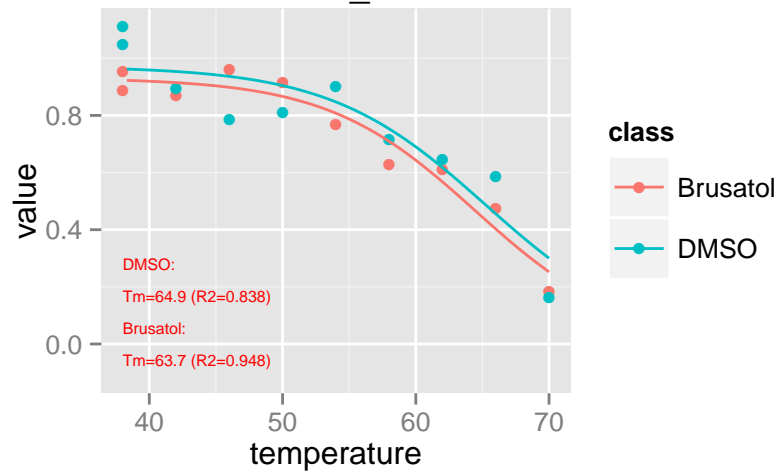

Prot: SPS2L\_HUMAN

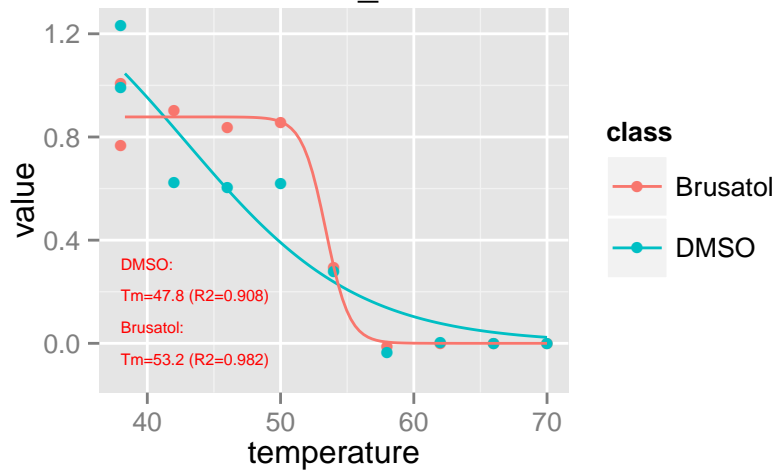

Prot: SPSY\_HUMAN

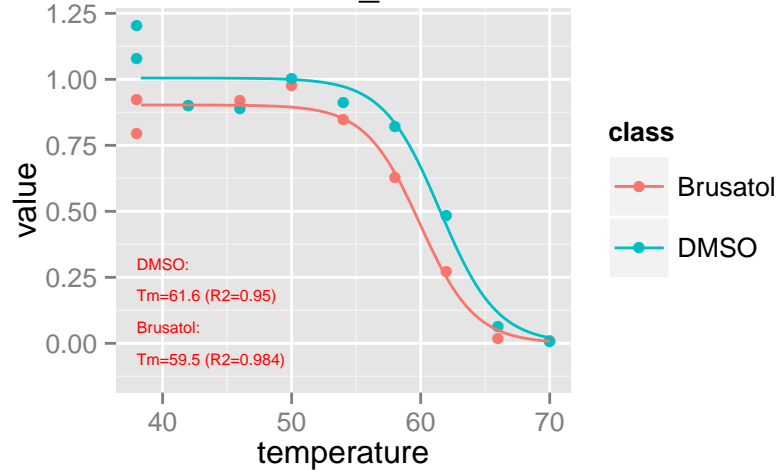

Prot: SPT4H\_HUMAN

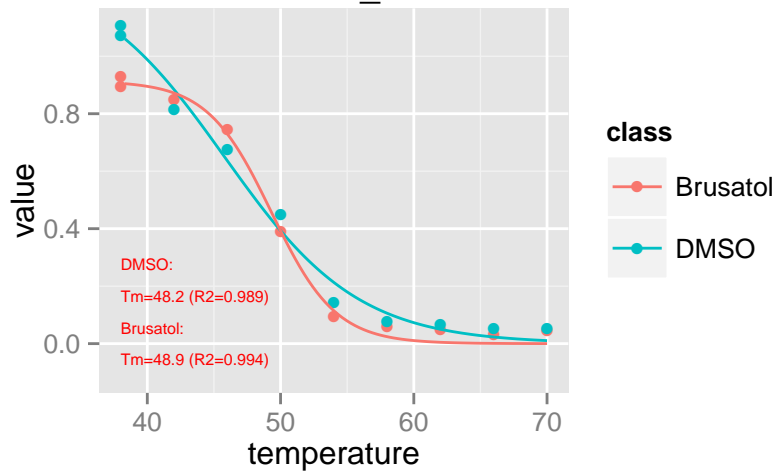

Prot: SPT5H\_HUMAN

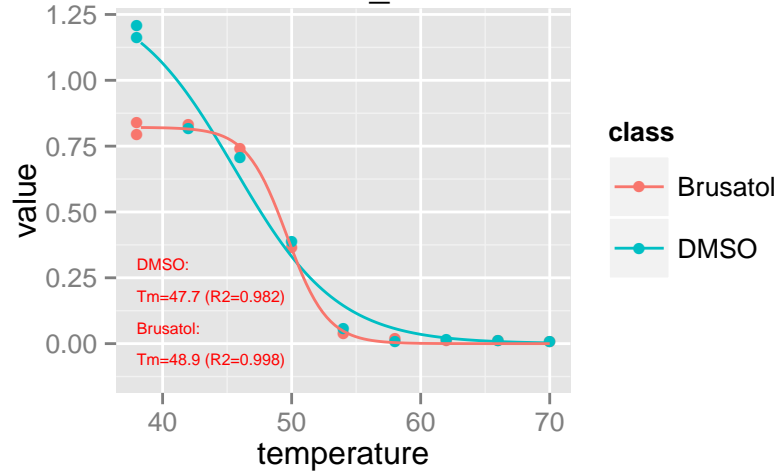

Prot: SPT6H\_HUMAN

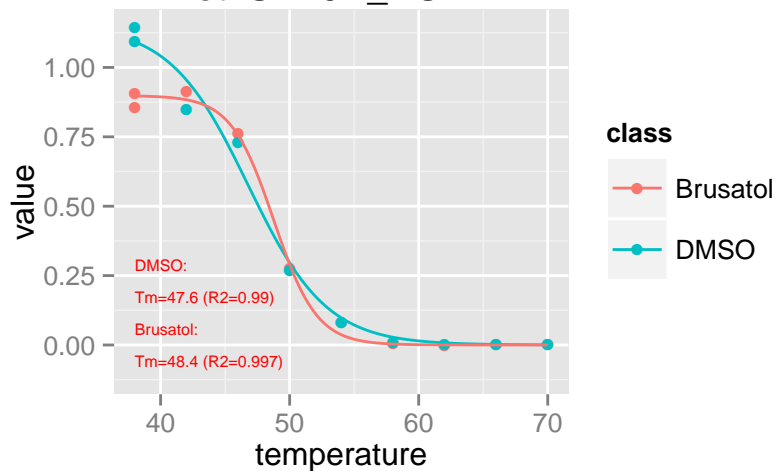

Prot: SPTA2\_HUMAN

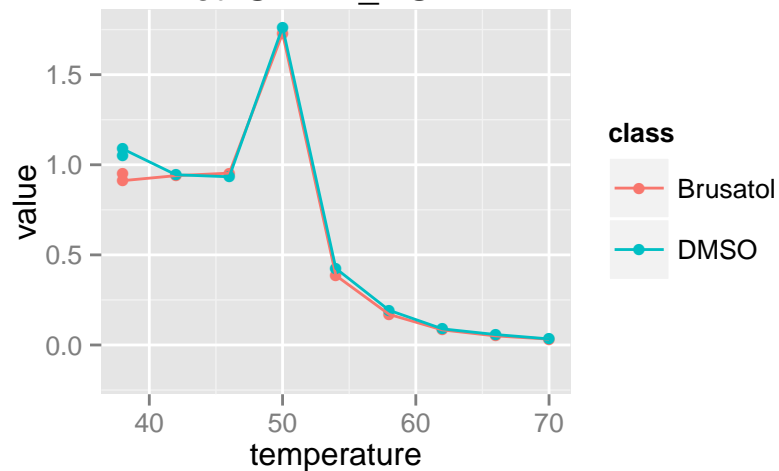

Prot: SPTB1\_HUMAN

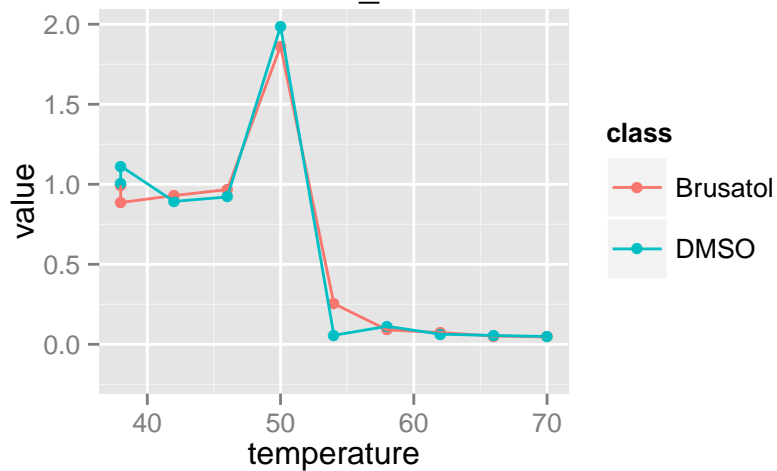

Prot: SPTB2\_HUMAN

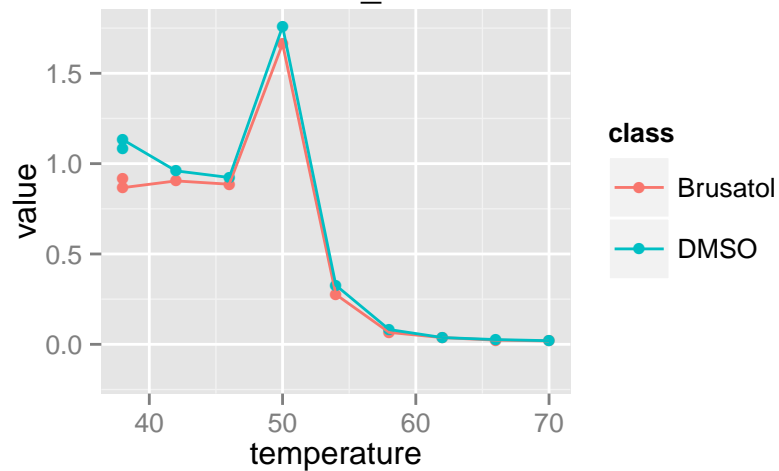

Prot: SQRD\_HUMAN

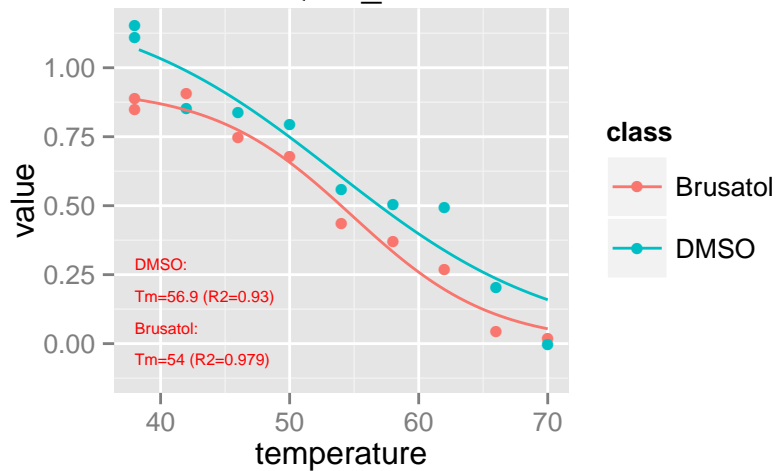

Prot: SQSTM\_HUMAN

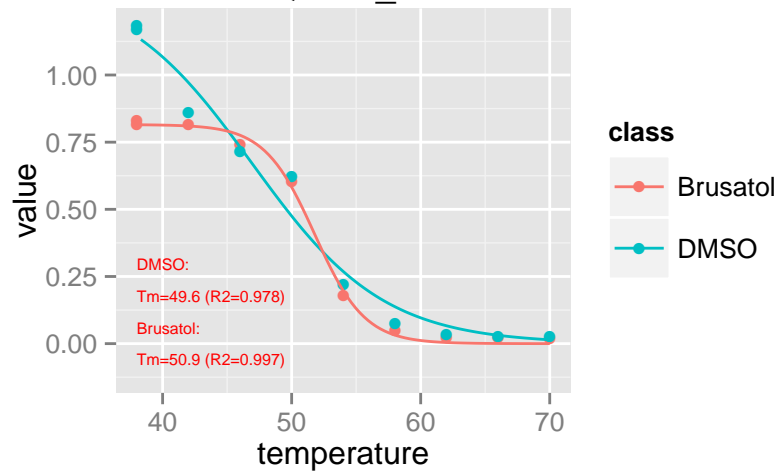

Prot: SRA1\_HUMAN

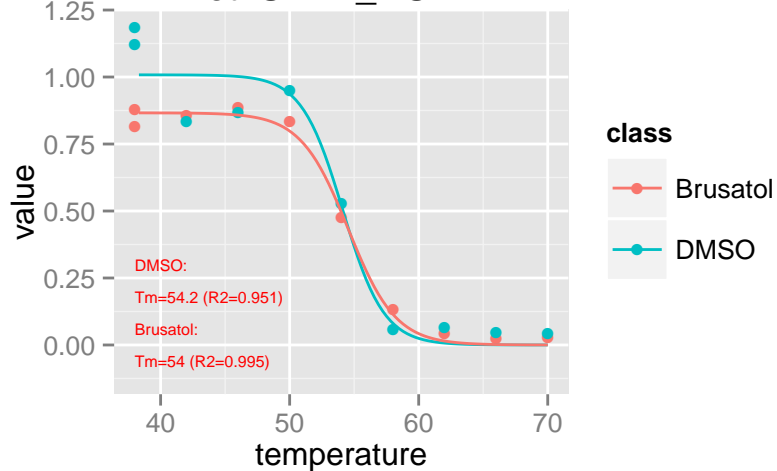

Prot: SRC\_HUMAN

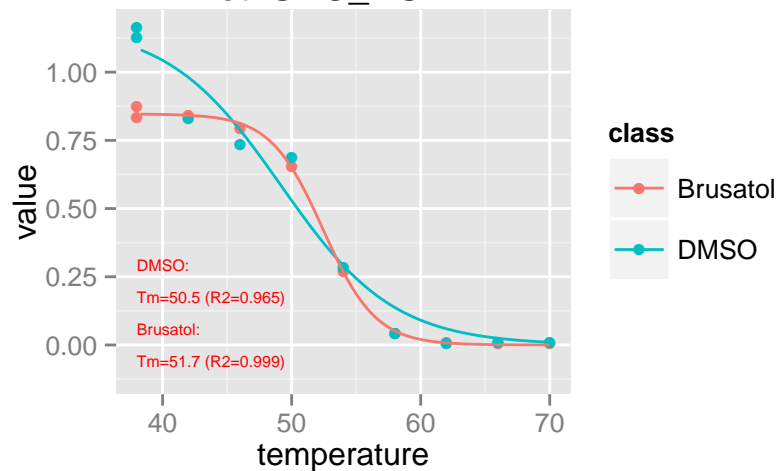

Prot: SRC8\_HUMAN

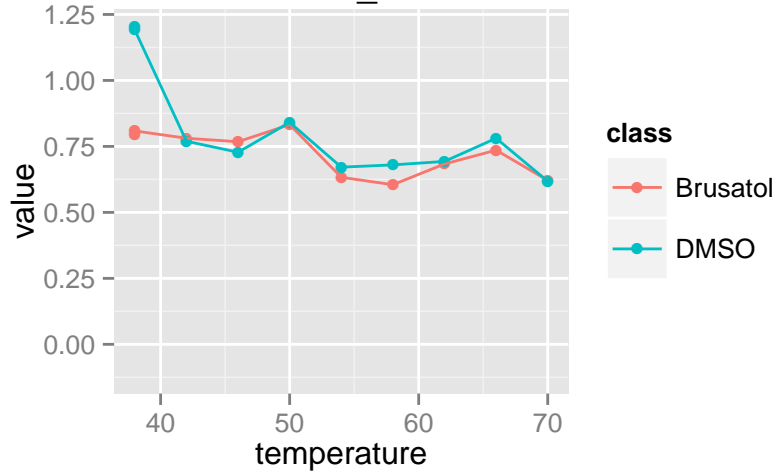

Prot: SRP09\_HUMAN

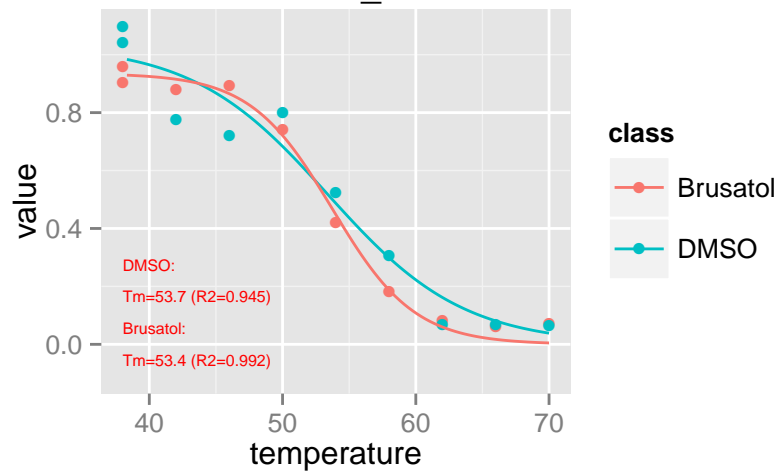



Prot: SRP14\_HUMAN

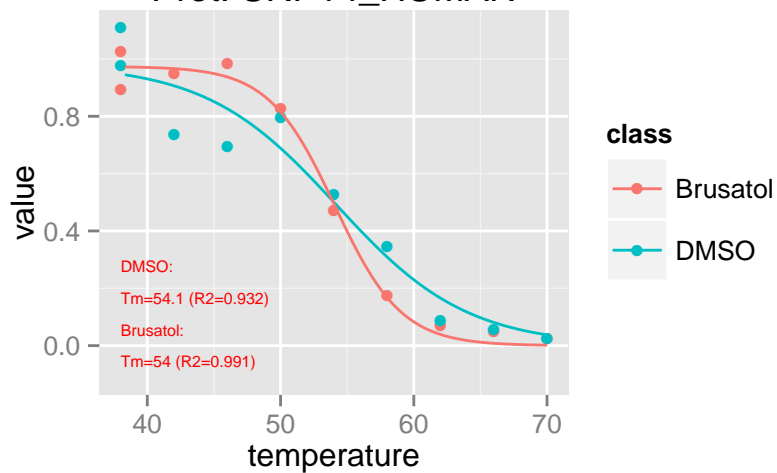

Prot: SRP19\_HUMAN

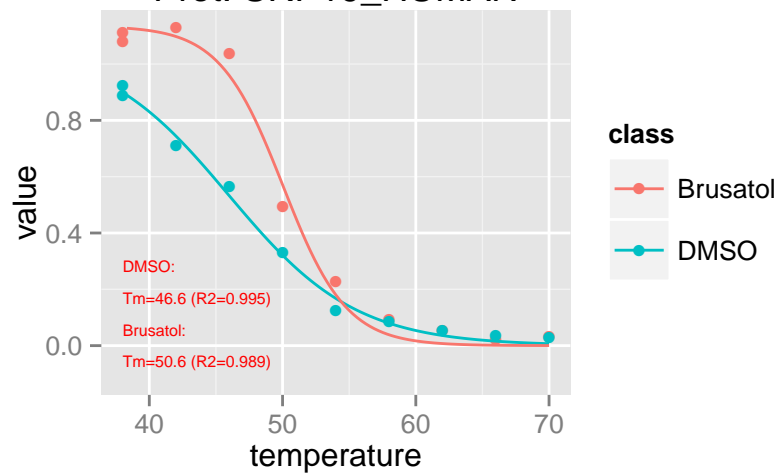

Prot: SRP54\_HUMAN

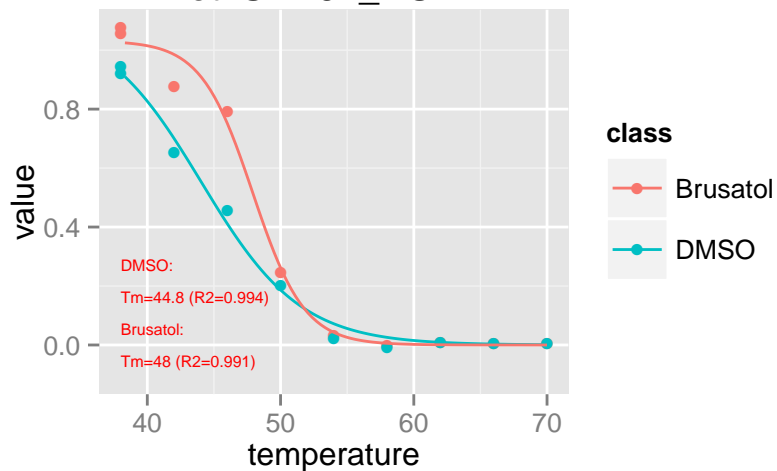

Prot: SRP68\_HUMAN

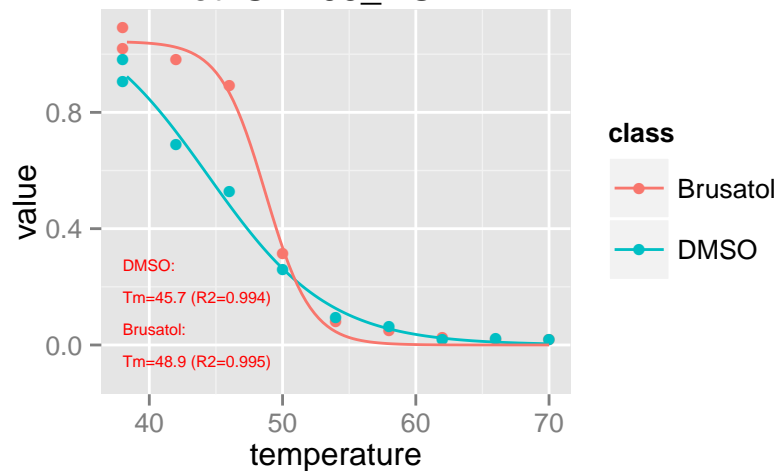

Prot: SRP72\_HUMAN

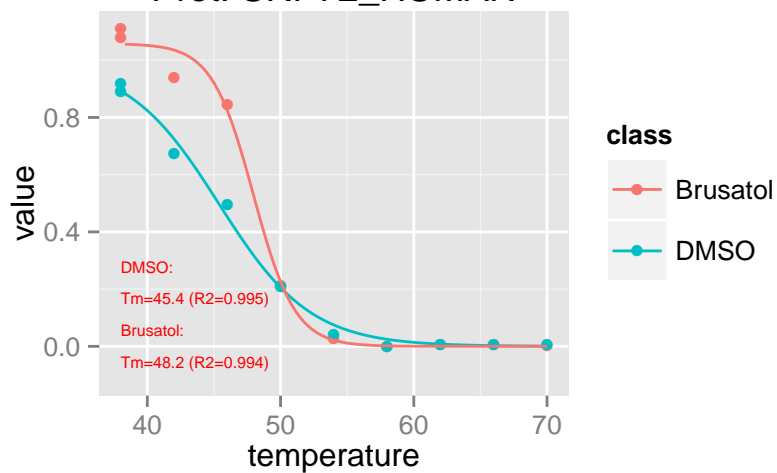

Prot: SRPK1\_HUMAN

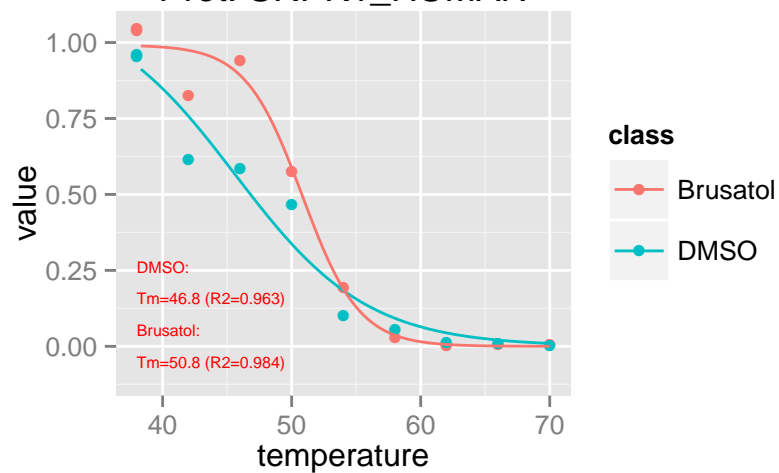

Prot: SRR\_HUMAN

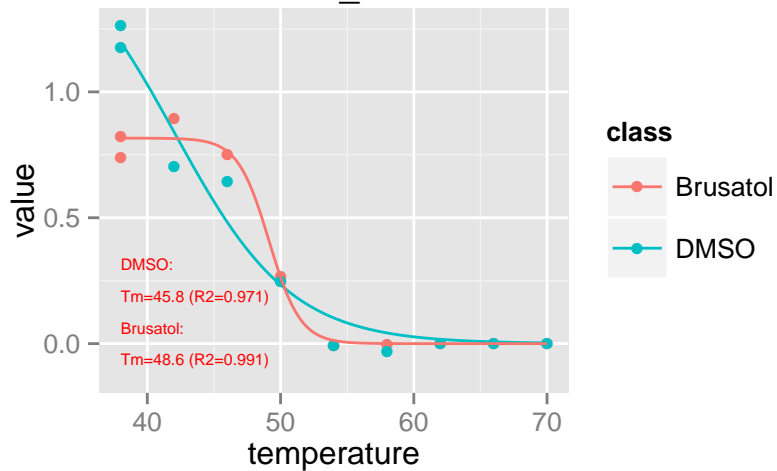

Prot: SRRM1\_HUMAN

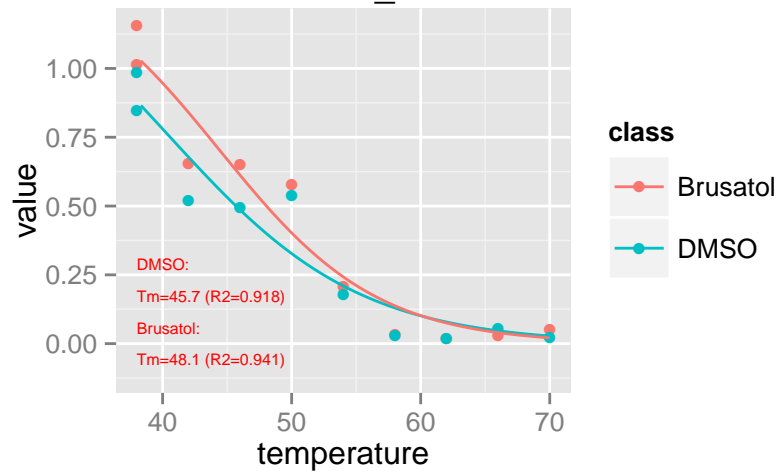

Prot: SRRM2\_HUMAN

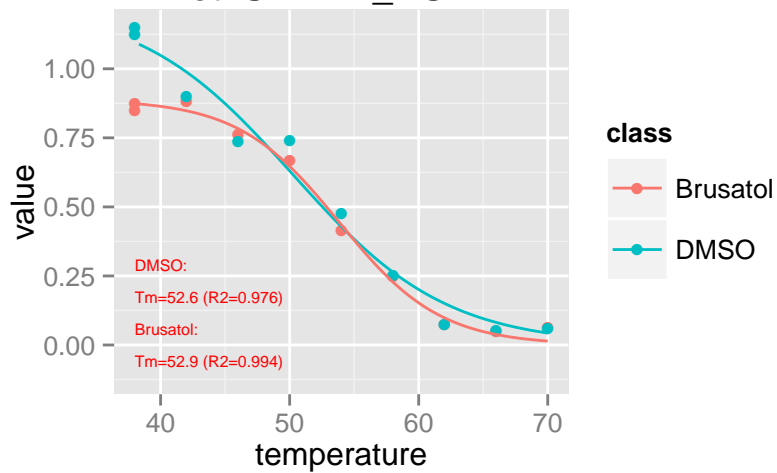

Prot: SRRT\_HUMAN

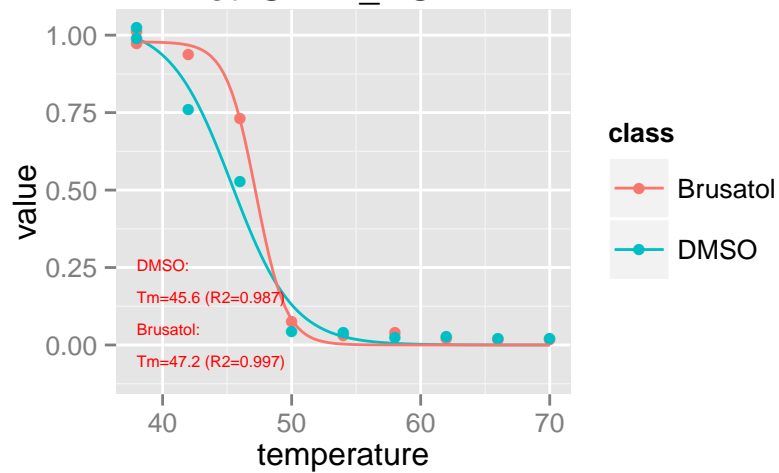

Prot: SRS11\_HUMAN

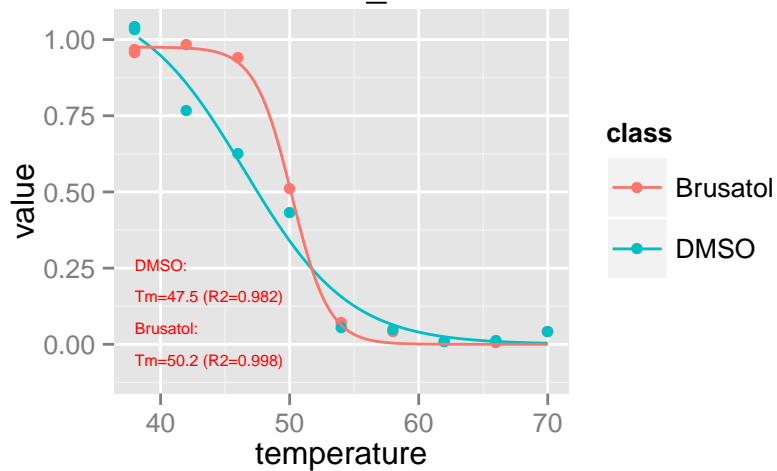

Prot: SRSF1\_HUMAN

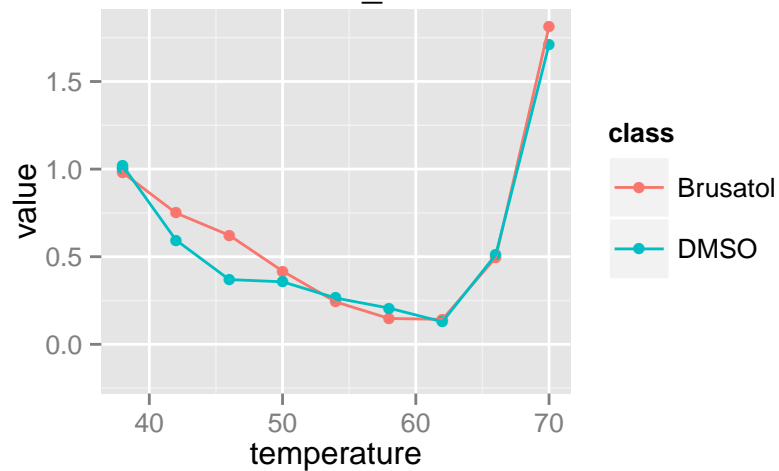

Prot: SRSF3\_HUMAN

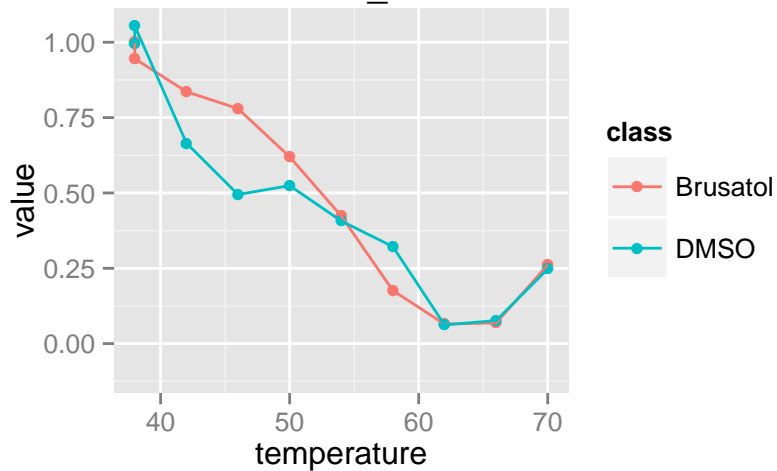

Prot: SRSF4\_HUMAN

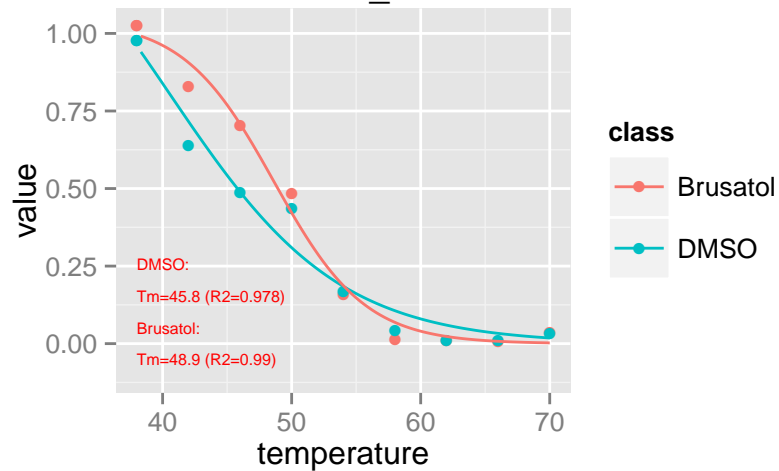

Prot: SRSF5\_HUMAN

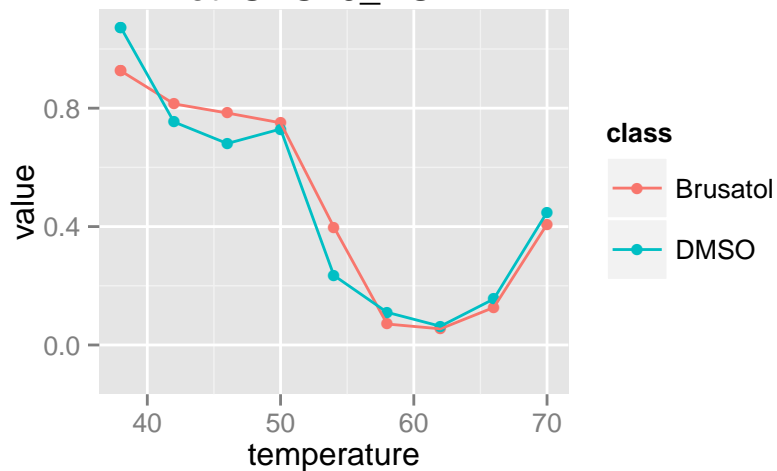

Prot: SRSF6\_HUMAN

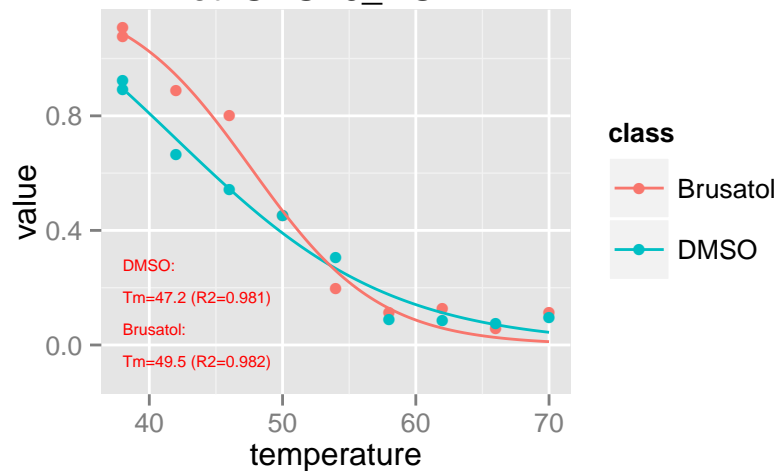

Prot: SRSF7\_HUMAN

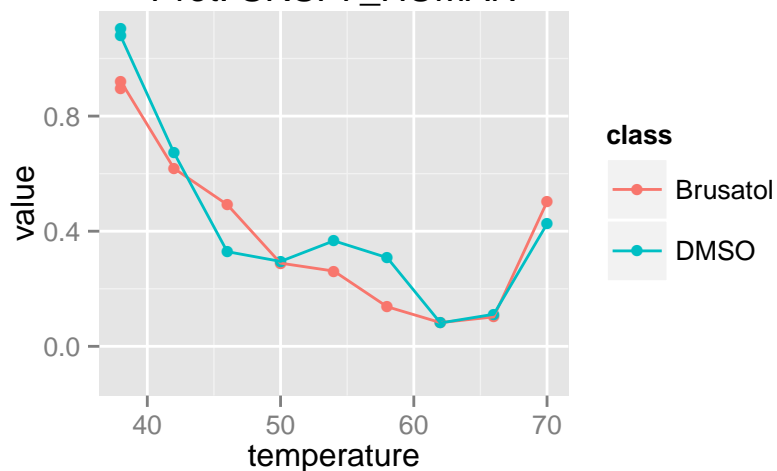

Prot: SRSF9\_HUMAN

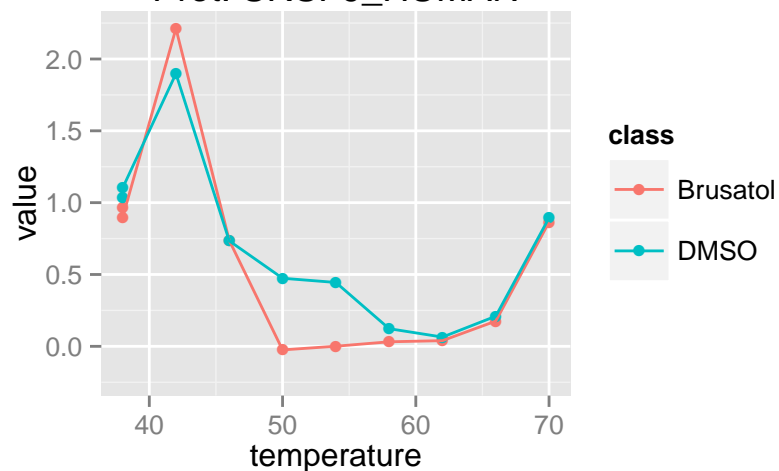

Prot: SRXN1\_HUMAN

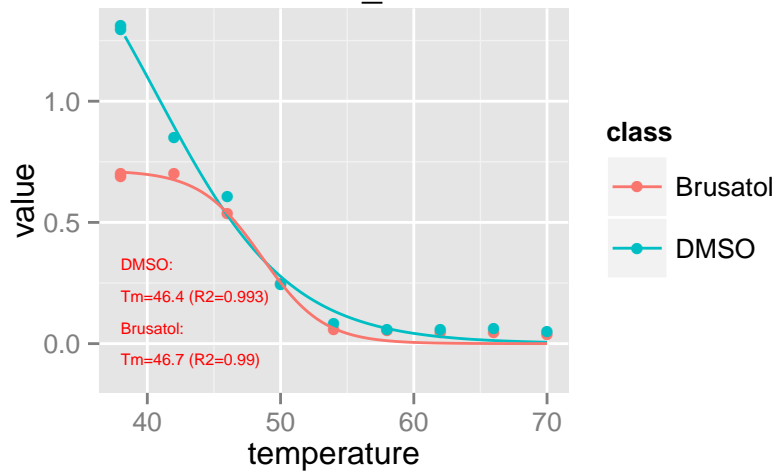

Prot: SSA27\_HUMAN

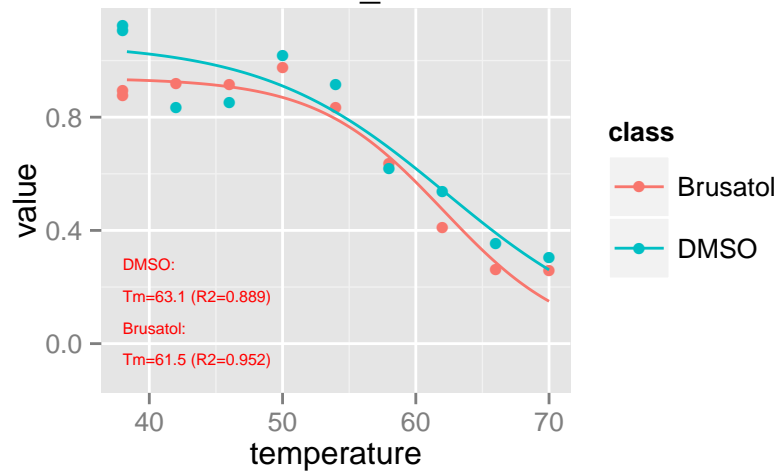

Prot: SSBP\_HUMAN

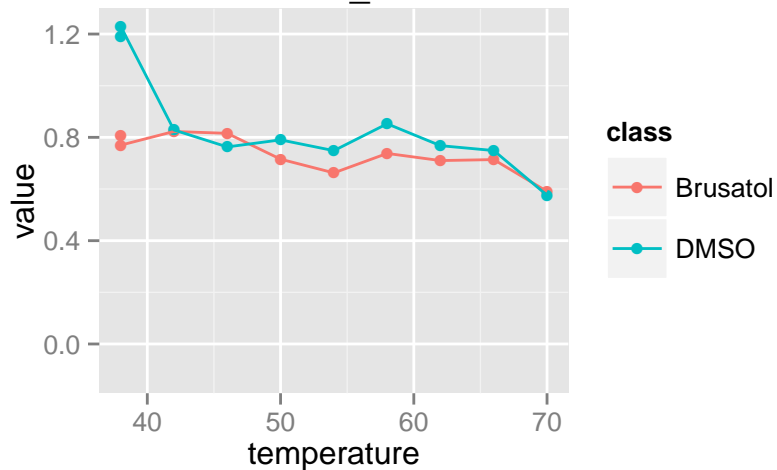

Prot: SSDH\_HUMAN

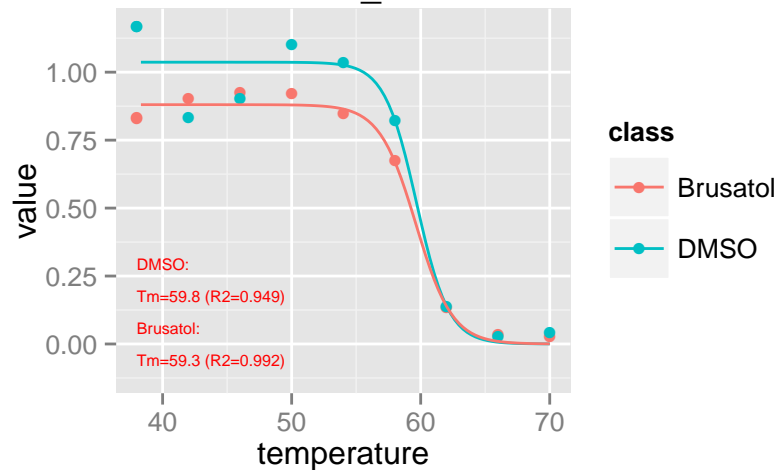

Prot: SSNA1\_HUMAN

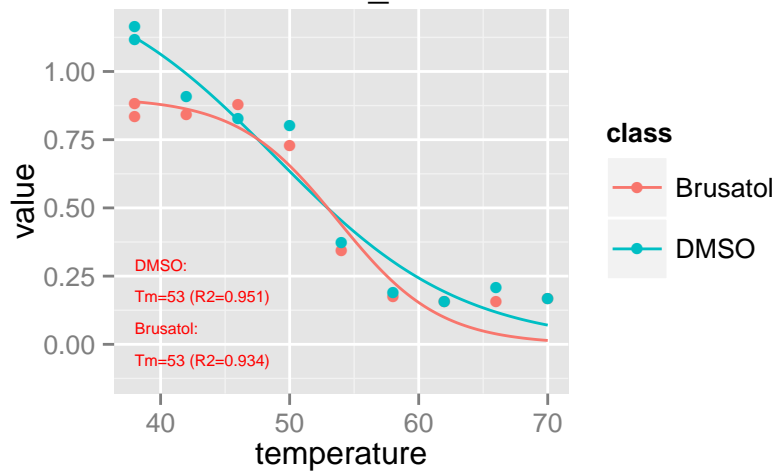

Prot: SSRP1\_HUMAN

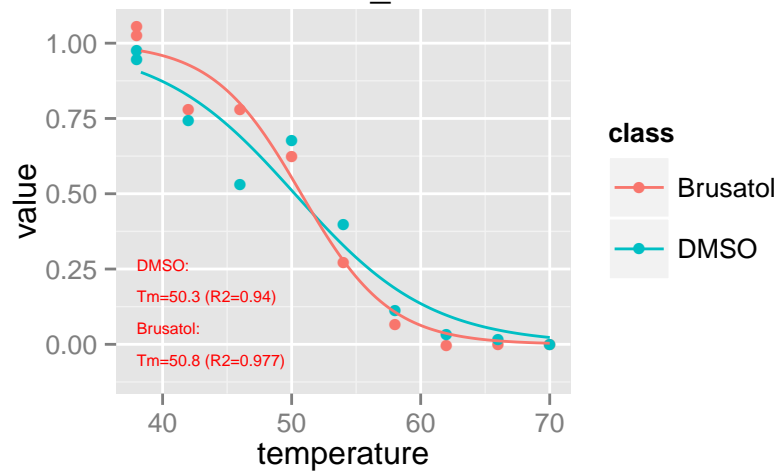

Prot: SSU72\_HUMAN

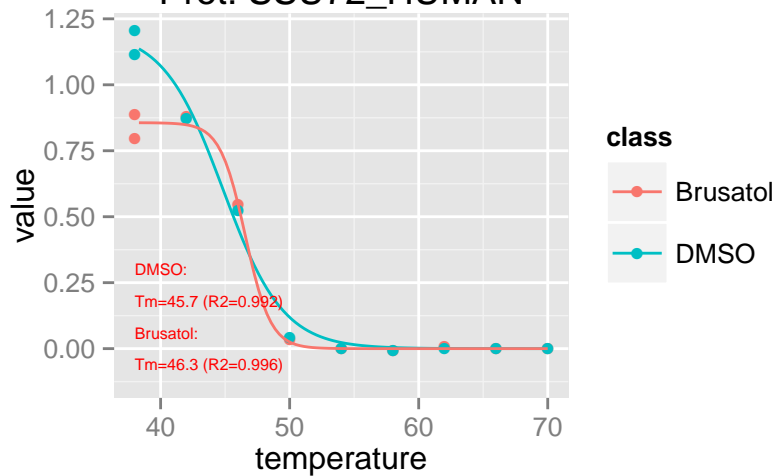

Prot: ST1A1\_HUMAN

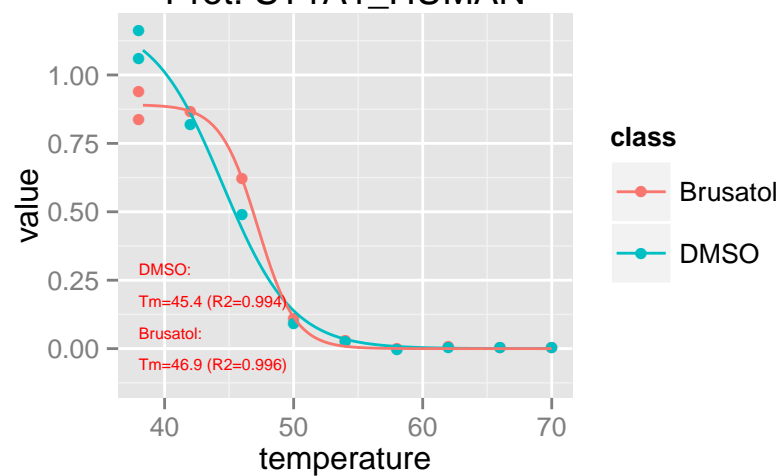

Prot: ST1A3\_HUMAN

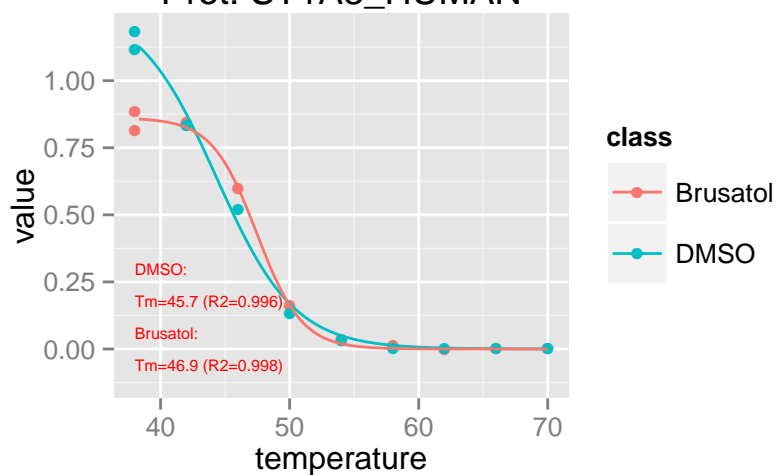

Prot: ST2B1\_HUMAN

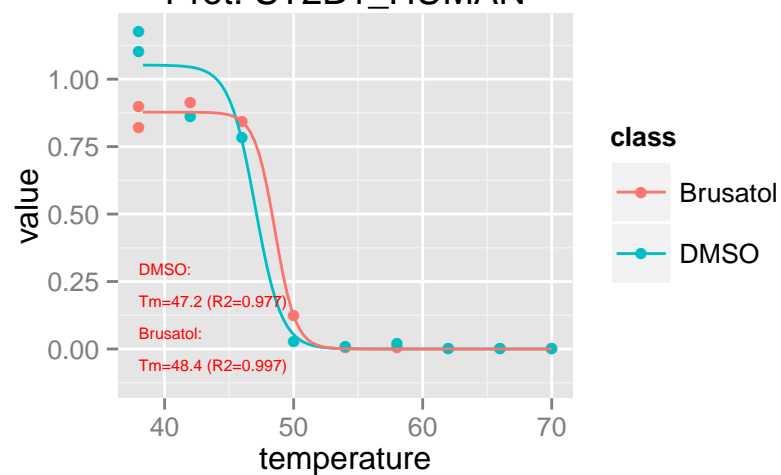

Prot: ST32C\_HUMAN

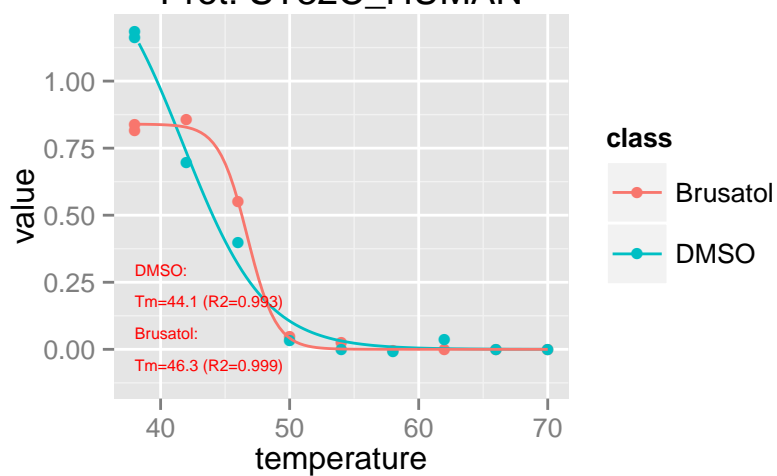

Prot: STA5A\_HUMAN

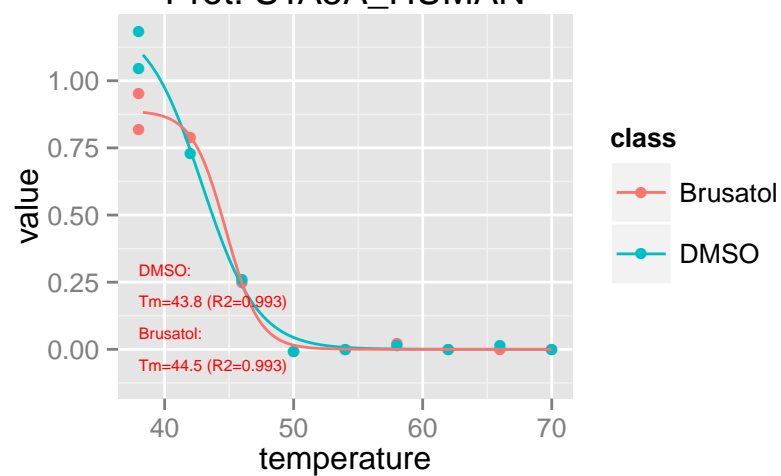

Prot: STA5B\_HUMAN

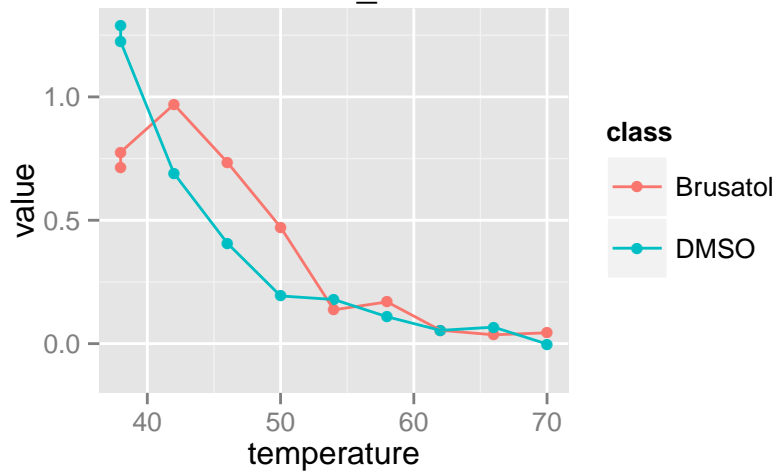

Prot: STABP\_HUMAN

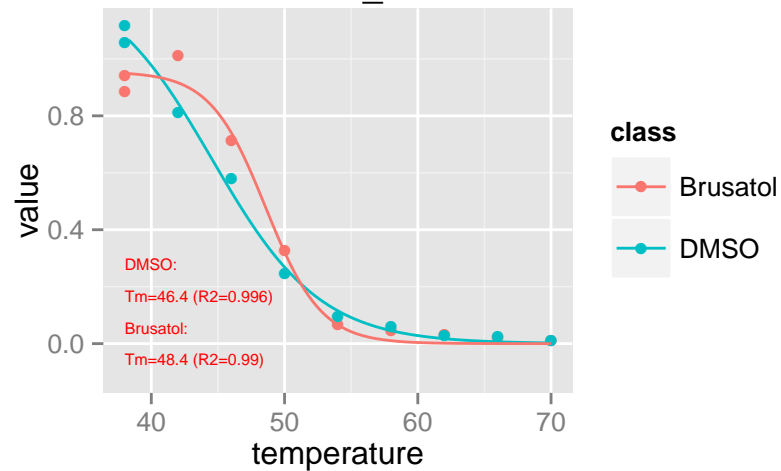

Prot: STAM1\_HUMAN

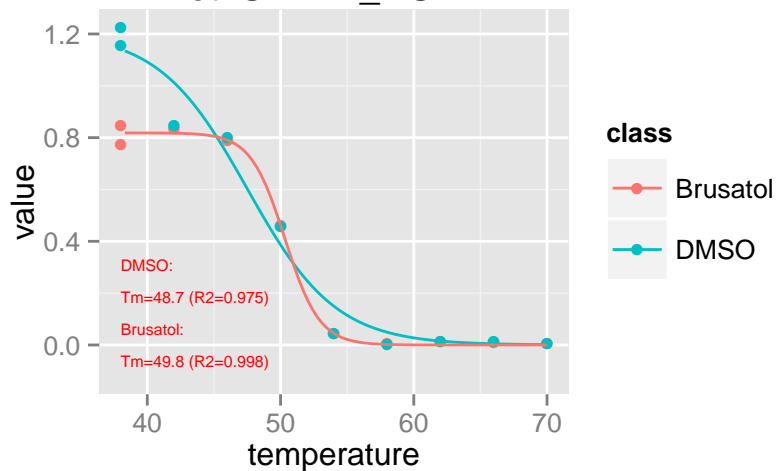

Prot: STAM2\_HUMAN

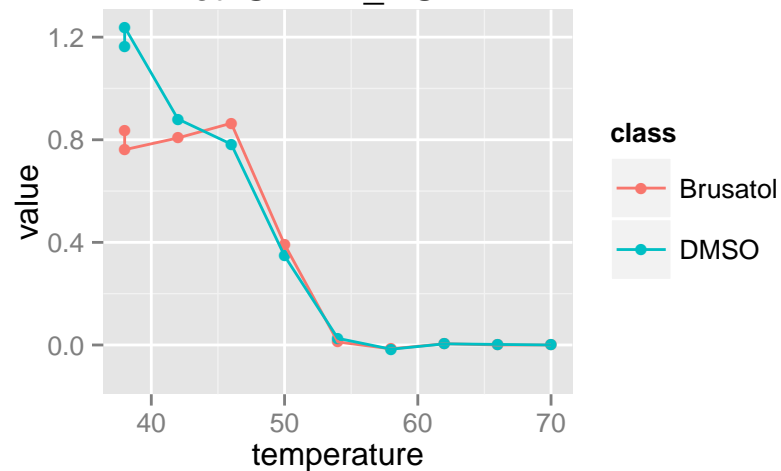

Prot: STAT1\_HUMAN

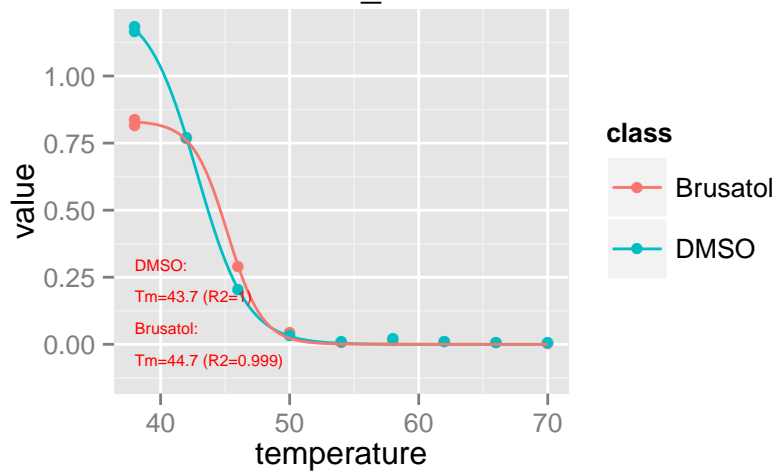

Prot: STAT3\_HUMAN

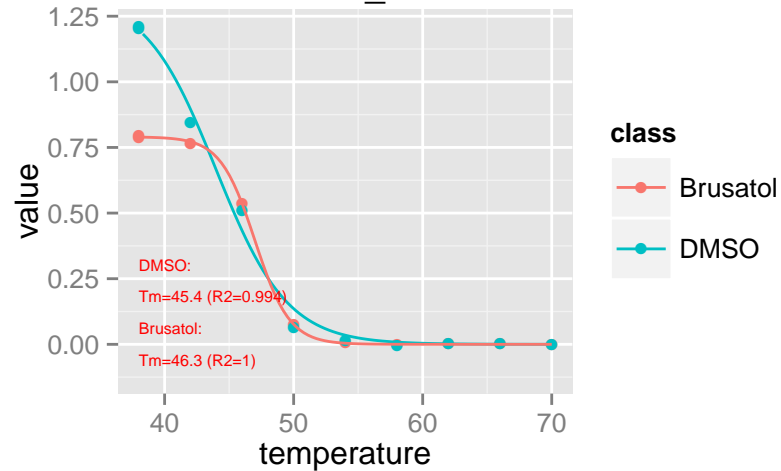

Prot: STAT6\_HUMAN

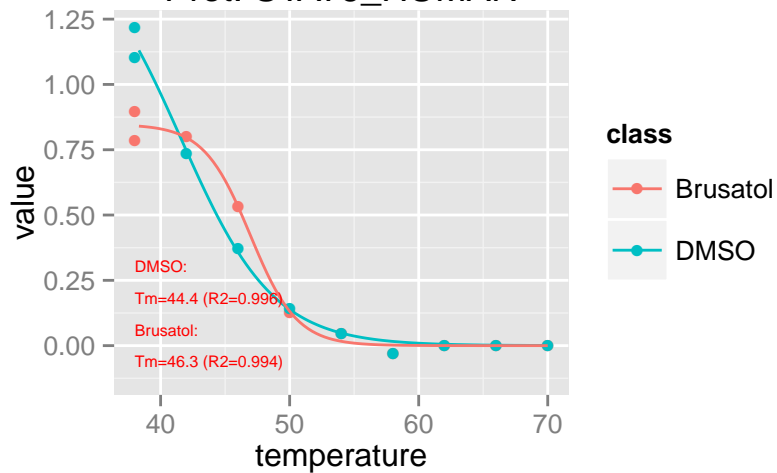

Prot: STAU1\_HUMAN

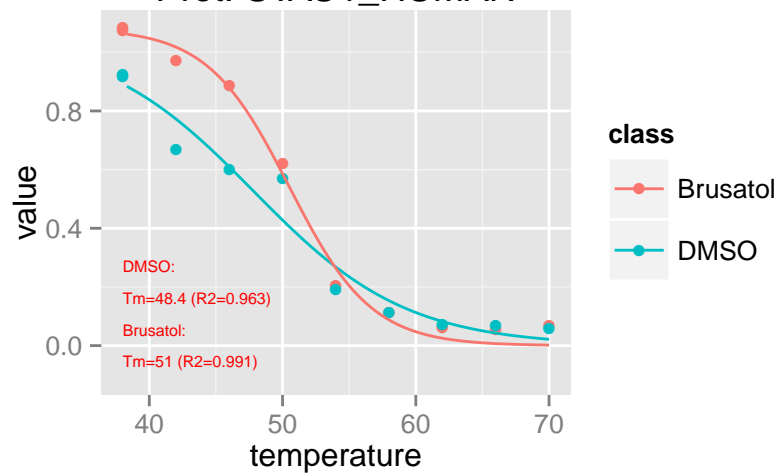

Prot: STIP1\_HUMAN

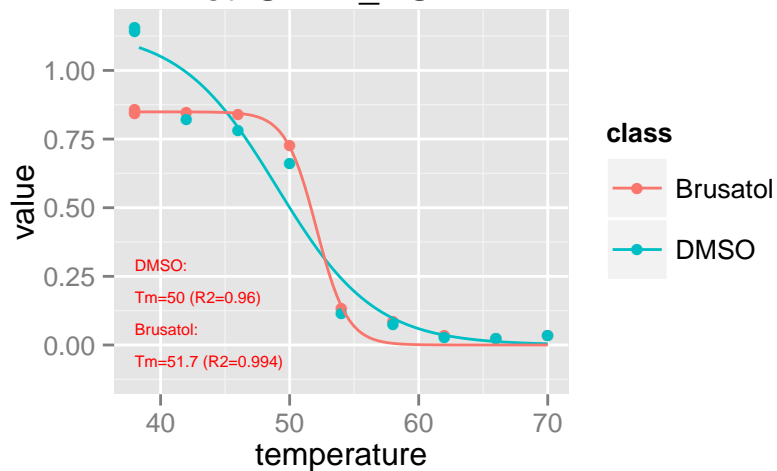

Prot: STK10\_HUMAN

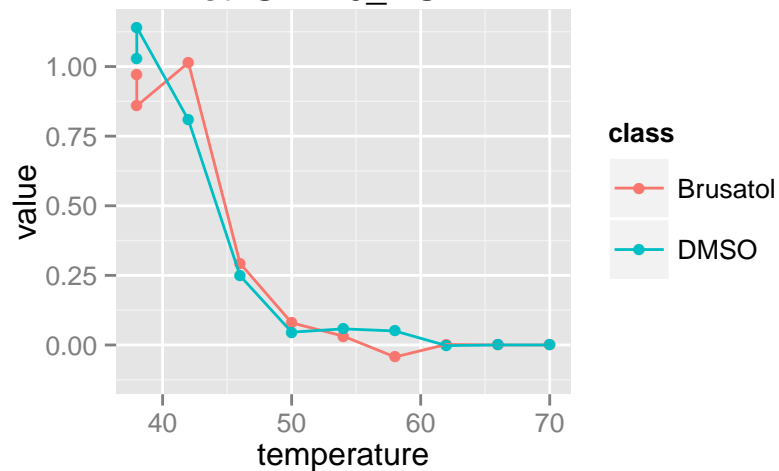

Prot: STK24\_HUMAN

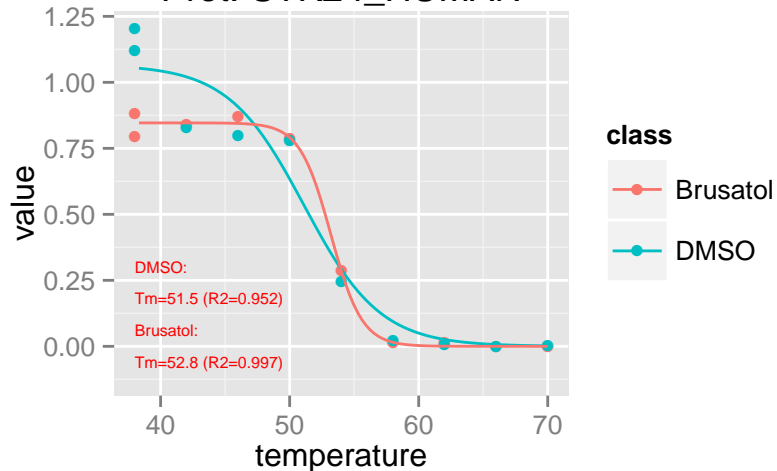

Prot: STK3\_HUMAN

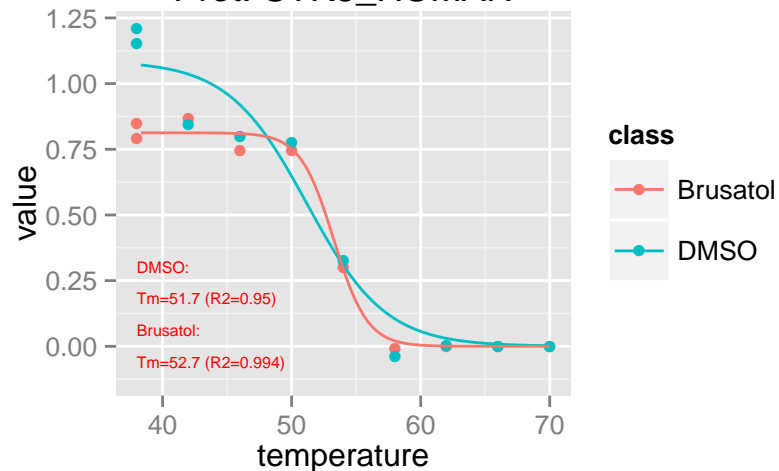

Prot: STK39\_HUMAN

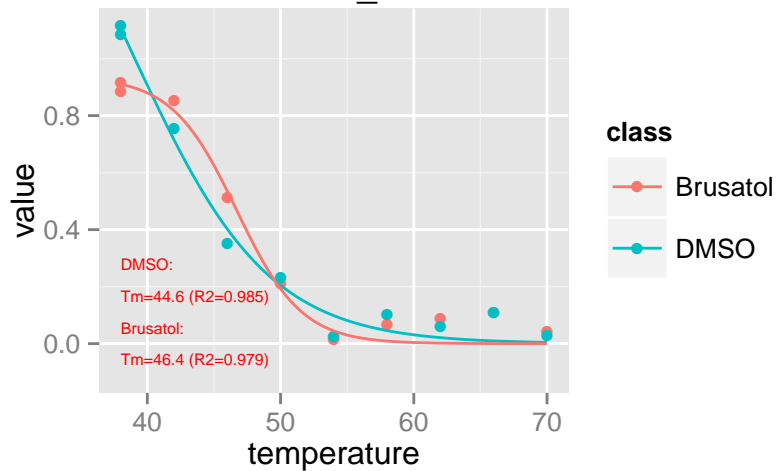

Prot: STK4\_HUMAN

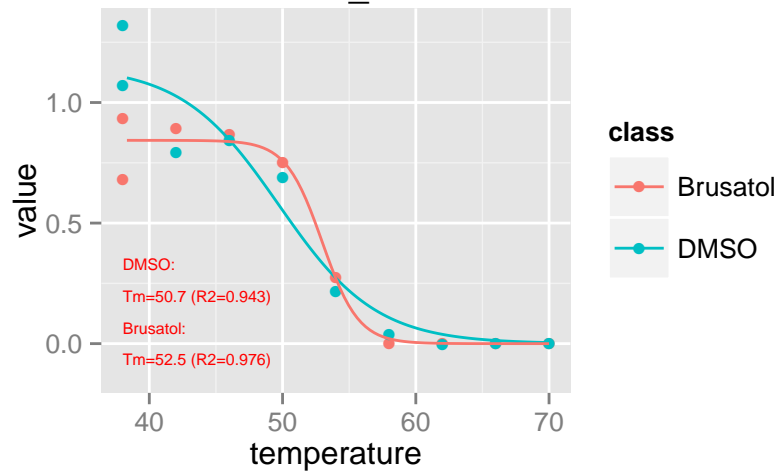

Prot: STML2\_HUMAN

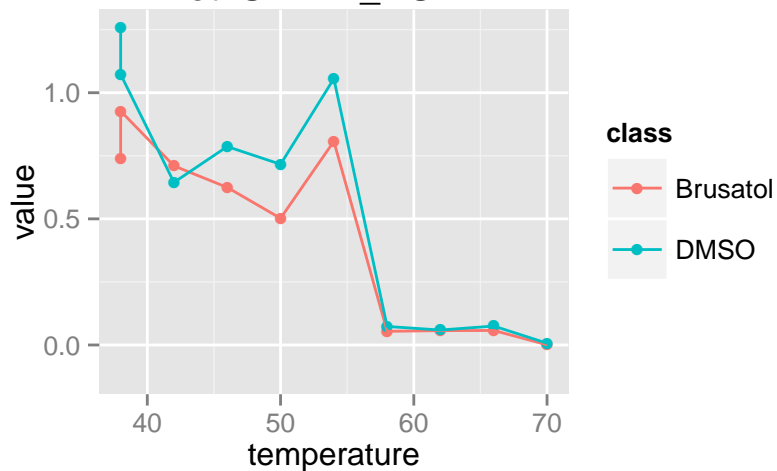

Prot: STMN1\_HUMAN

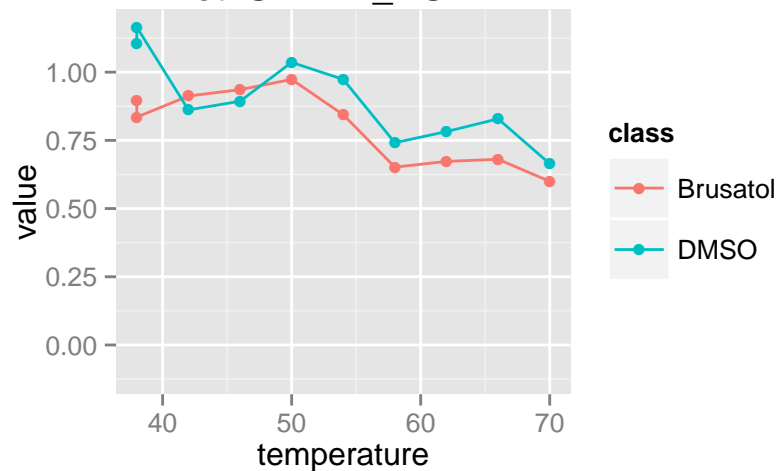

Prot: STRAP\_HUMAN

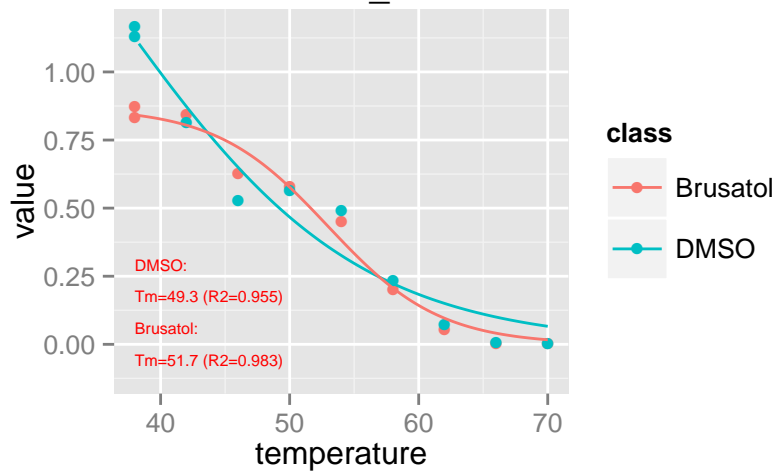

Prot: STRN\_HUMAN

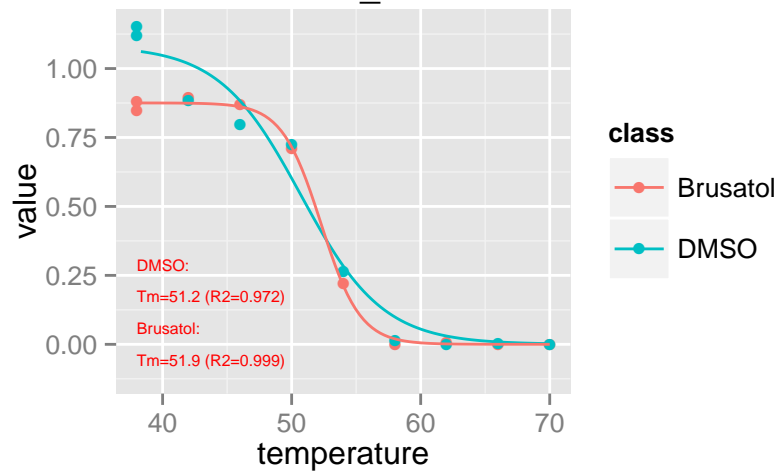



Prot: STRN3\_HUMAN

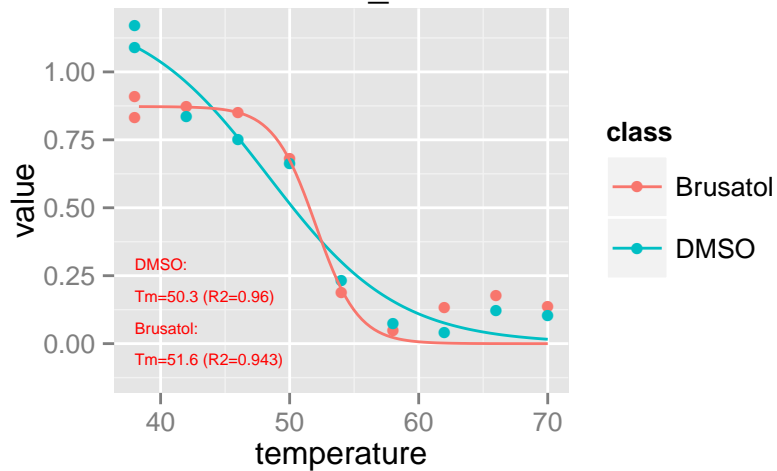

Prot: STRN4\_HUMAN

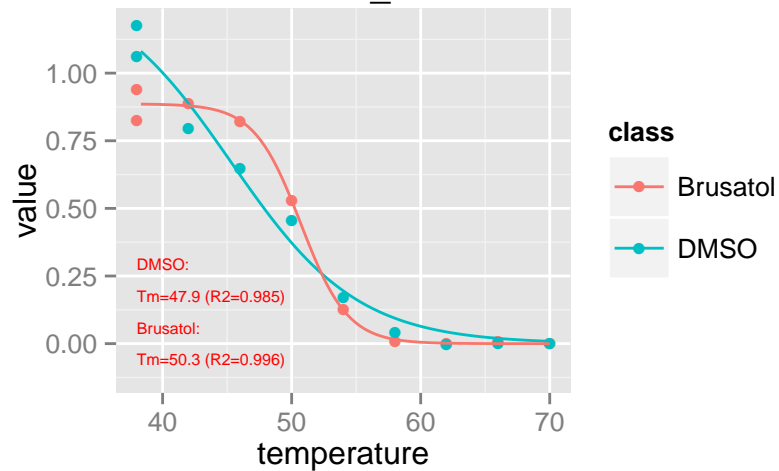

Prot: STRUM\_HUMAN

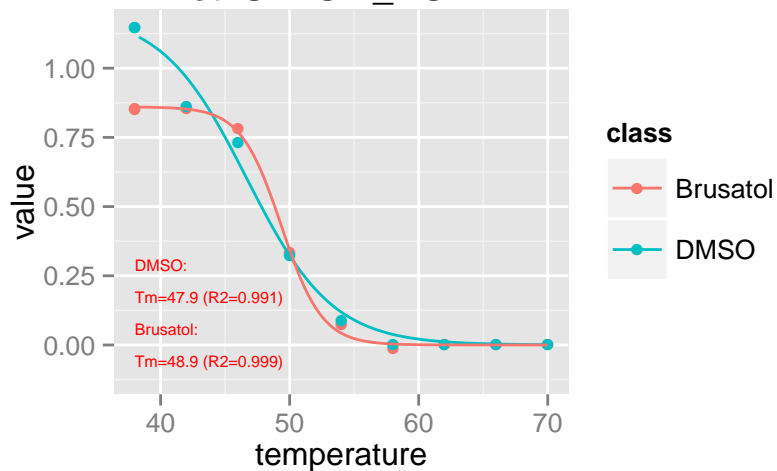

Prot: STX7\_HUMAN

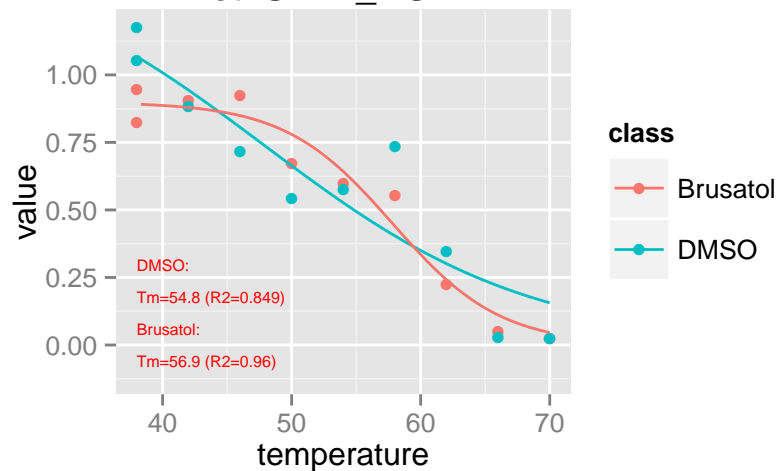

Prot: STX8\_HUMAN

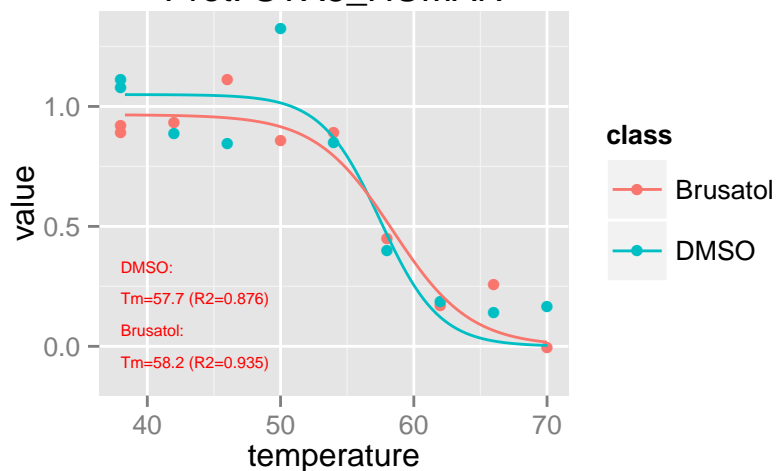

Prot: STXB1\_HUMAN

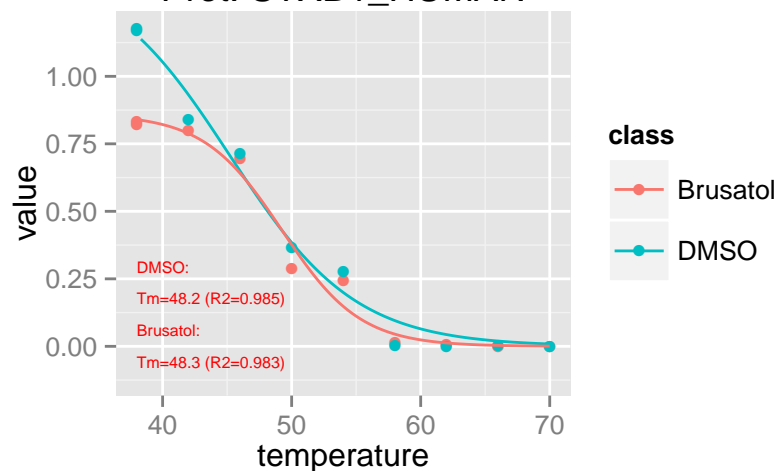

Prot: STXB2\_HUMAN

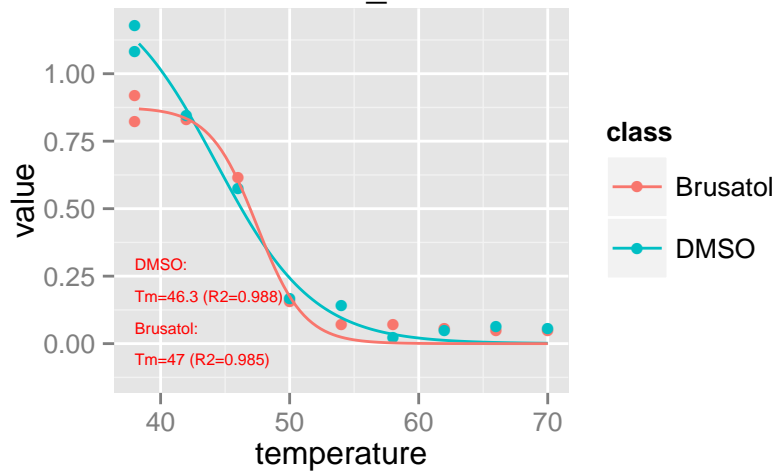

Prot: STXB4\_HUMAN

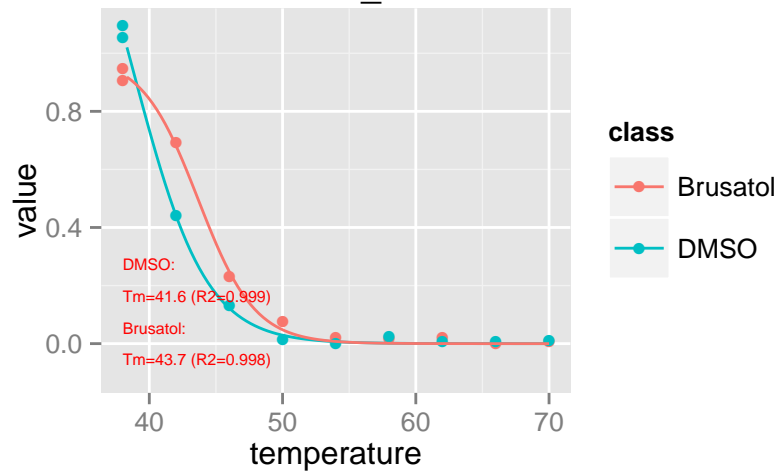

Prot: SUCA\_HUMAN

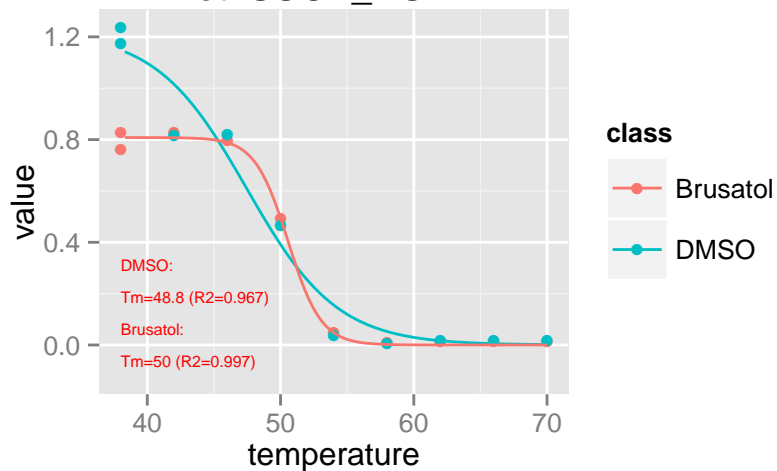

Prot: SUCB1\_HUMAN

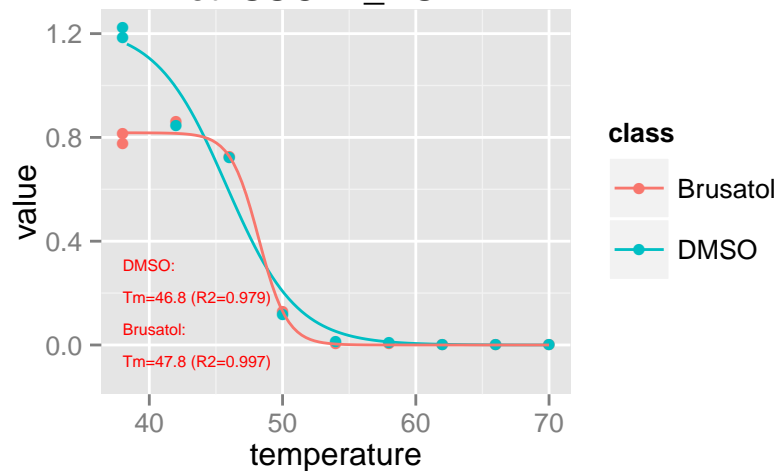

Prot: SUCB2\_HUMAN

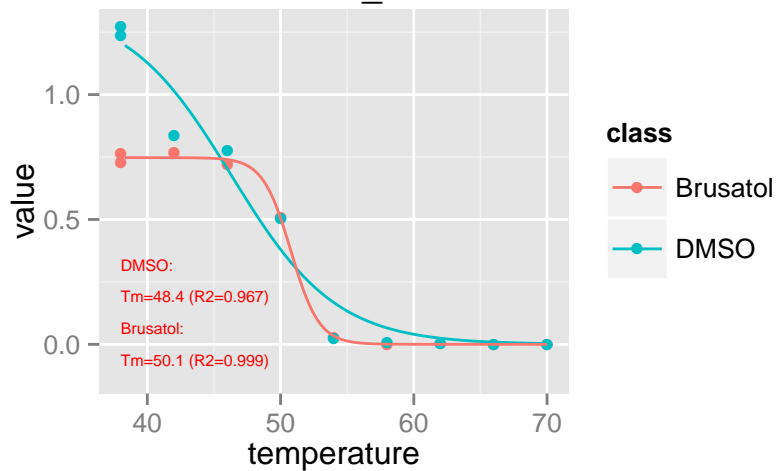

Prot: SUGT1\_HUMAN

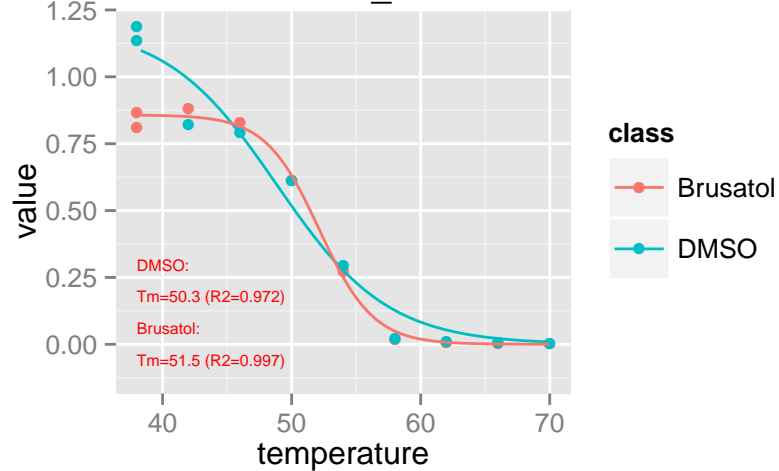

Prot: SUMF2\_HUMAN

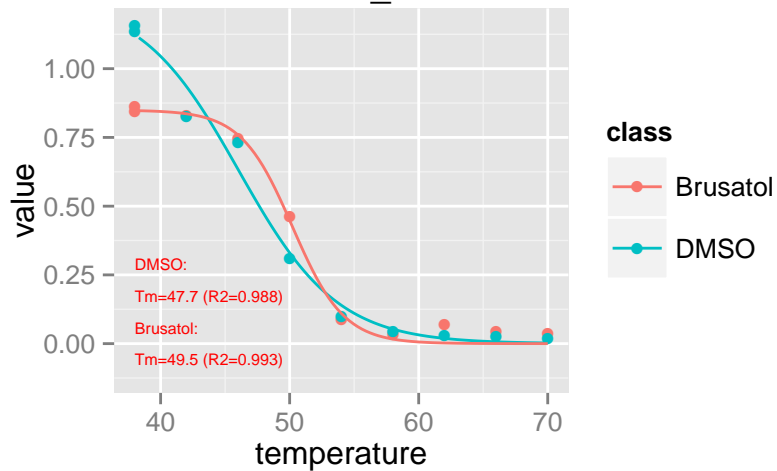

Prot: SUMO1\_HUMAN

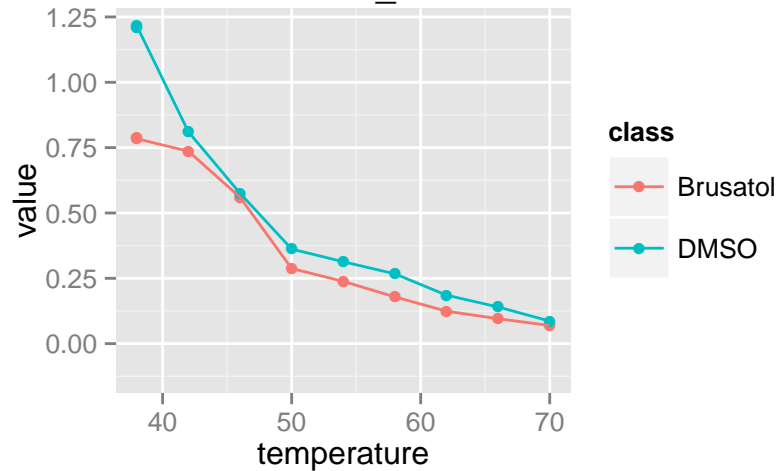

Prot: SUMO2\_HUMAN

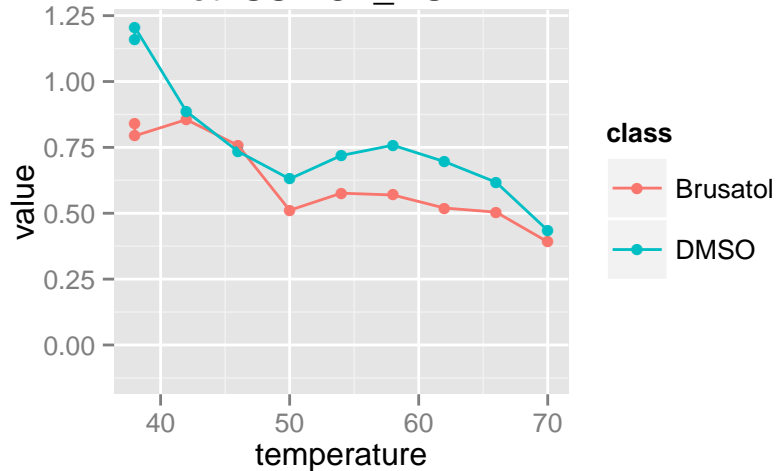

Prot: SUV3\_HUMAN

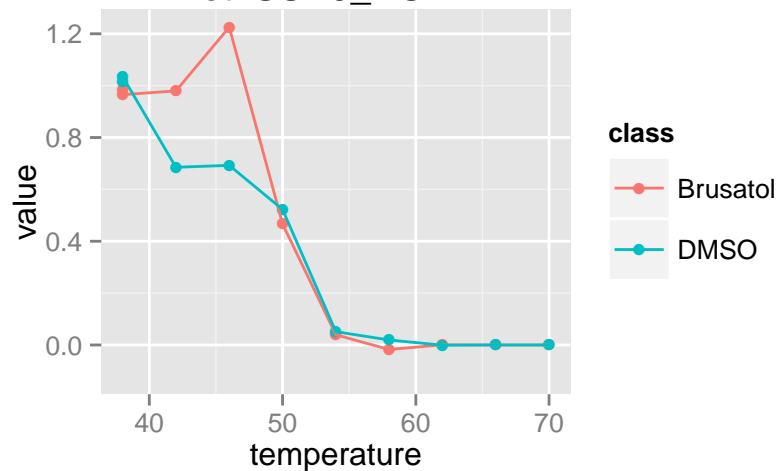

Prot: SUZ12\_HUMAN

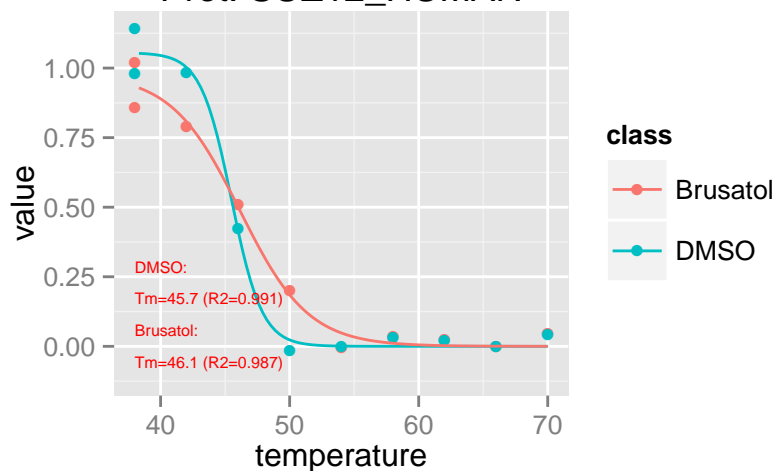

Prot: SWP70\_HUMAN

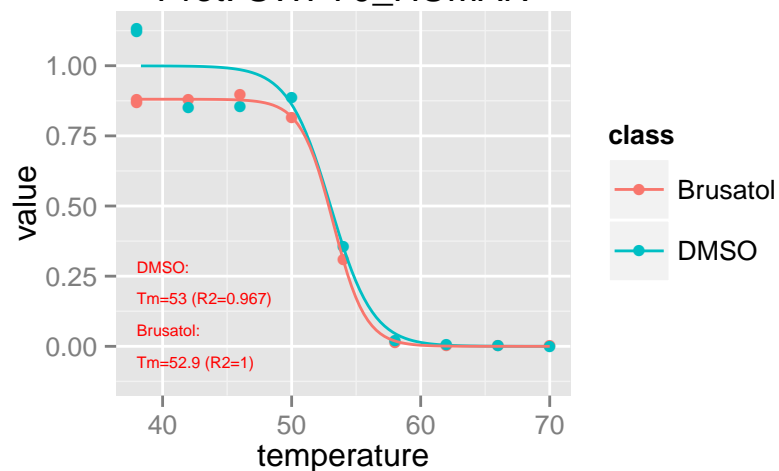

Prot: SYAC\_HUMAN

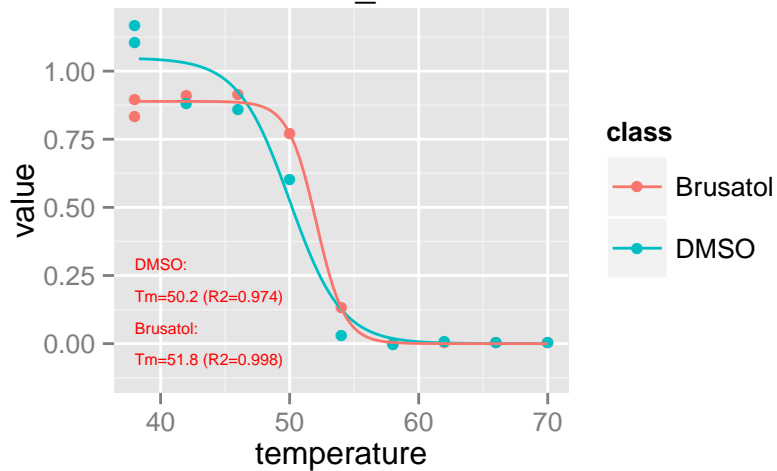

Prot: SYAP1\_HUMAN

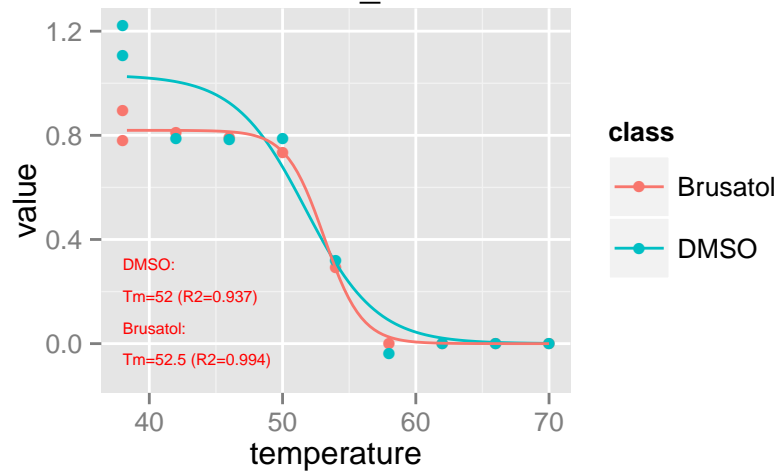

Prot: SYCC\_HUMAN

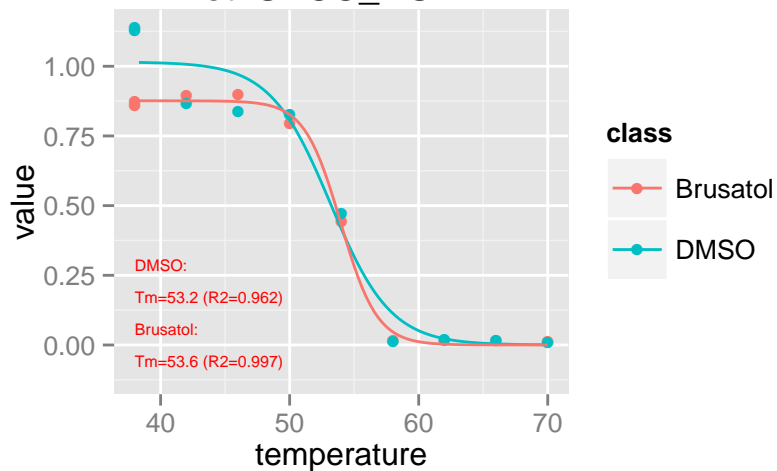

Prot: SYCM\_HUMAN

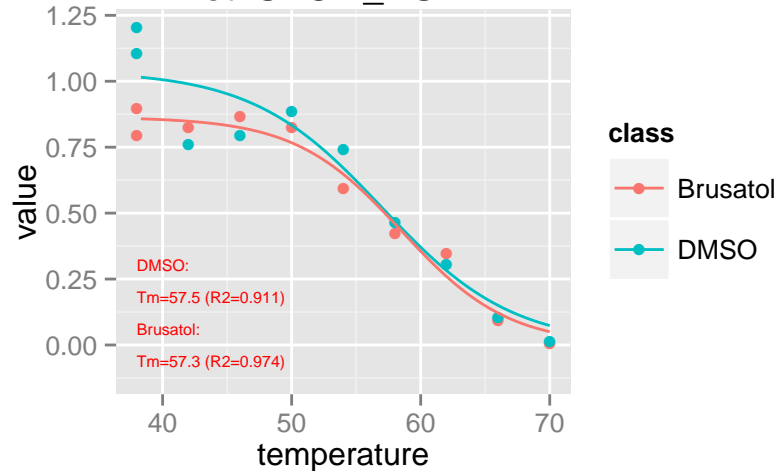

Prot: SYDC\_HUMAN

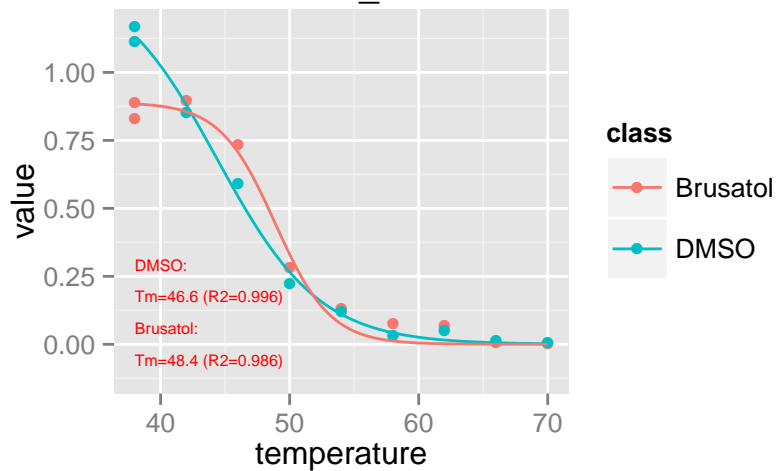

Prot: SYDM\_HUMAN

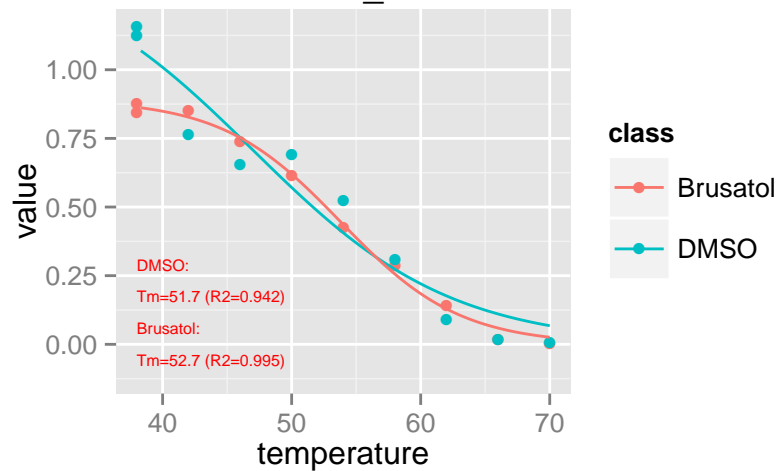

Prot: SYEM\_HUMAN

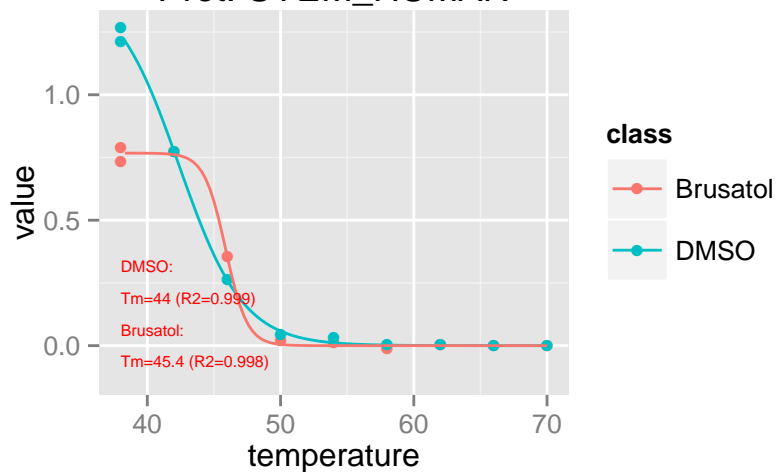

Prot: SYEP\_HUMAN

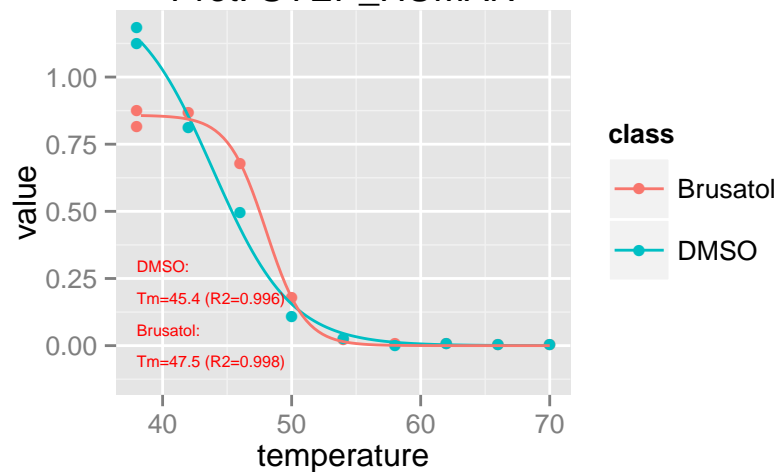

Prot: SYF1\_HUMAN

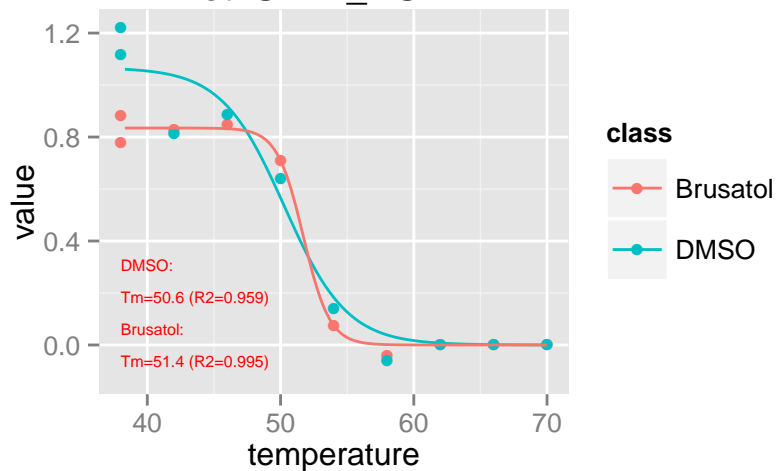

Prot: SYFA\_HUMAN

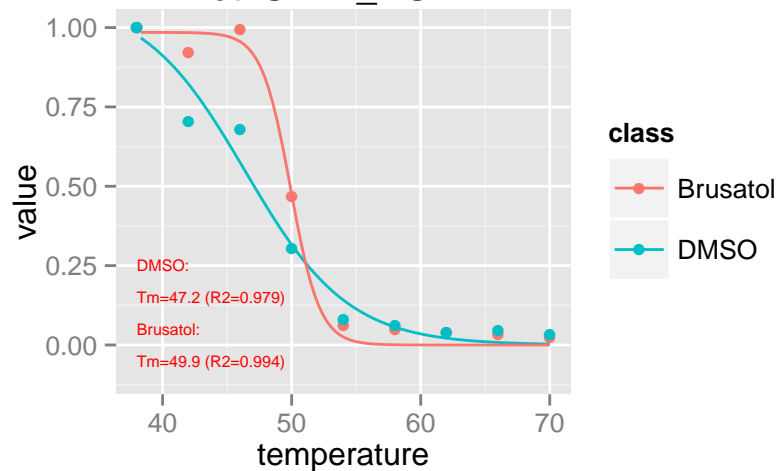

Prot: SYFB\_HUMAN

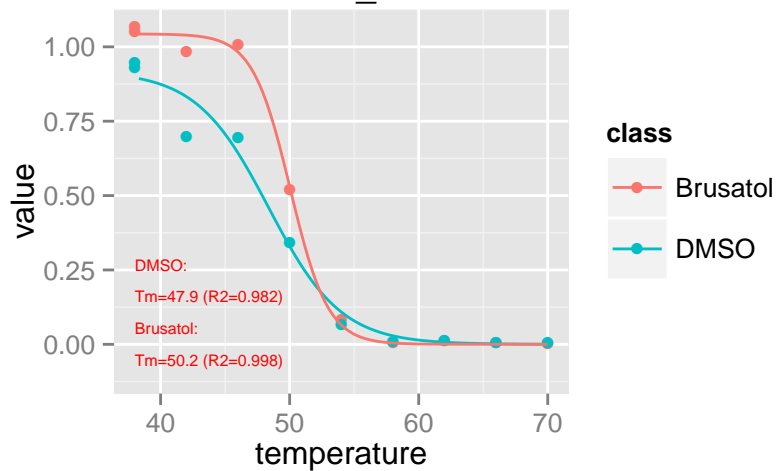

Prot: SYG\_HUMAN

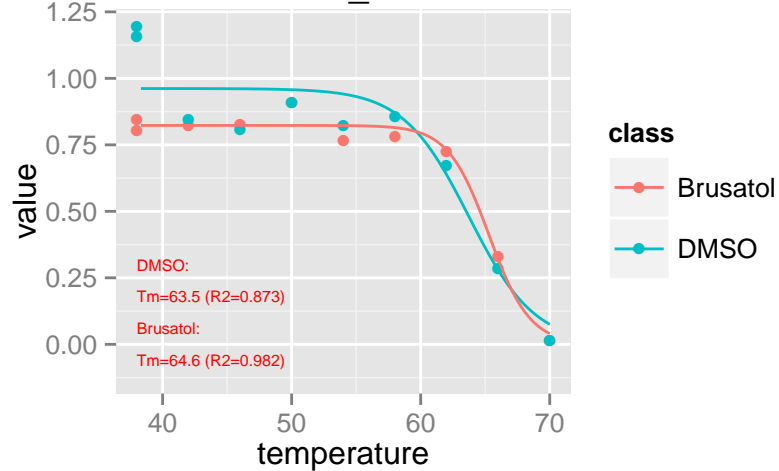

Prot: SYHC\_HUMAN

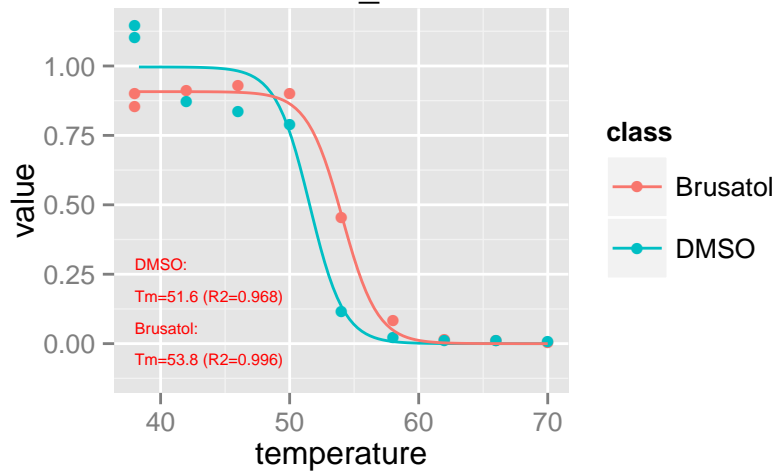

Prot: SYHM\_HUMAN

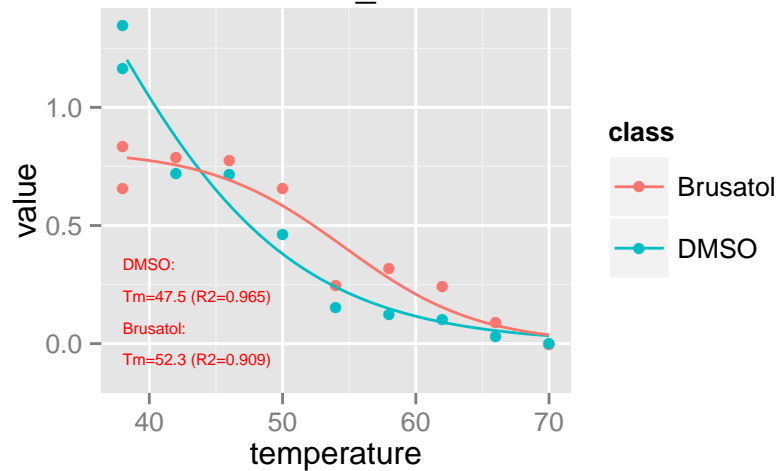

Prot: SYIC\_HUMAN

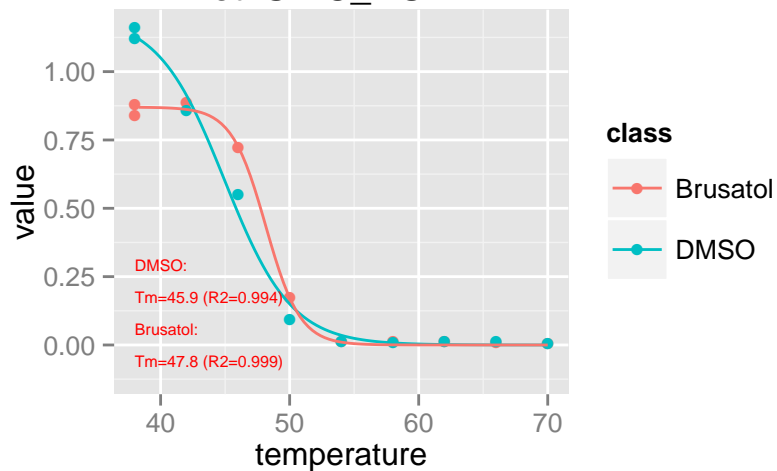

Prot: SYIM\_HUMAN

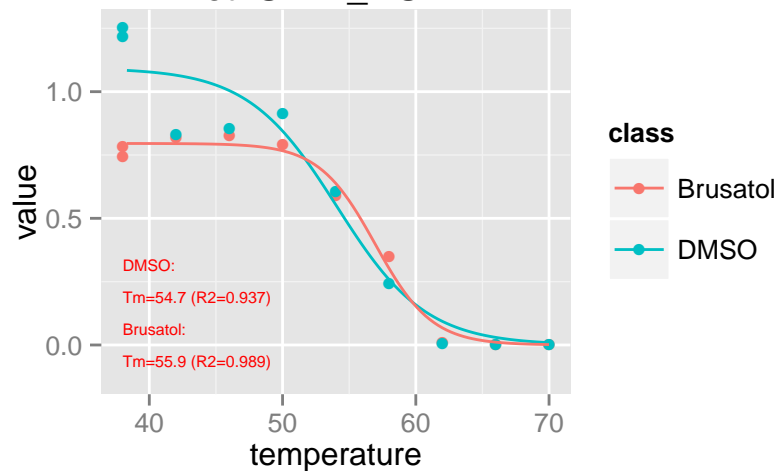

Prot: SYK\_HUMAN

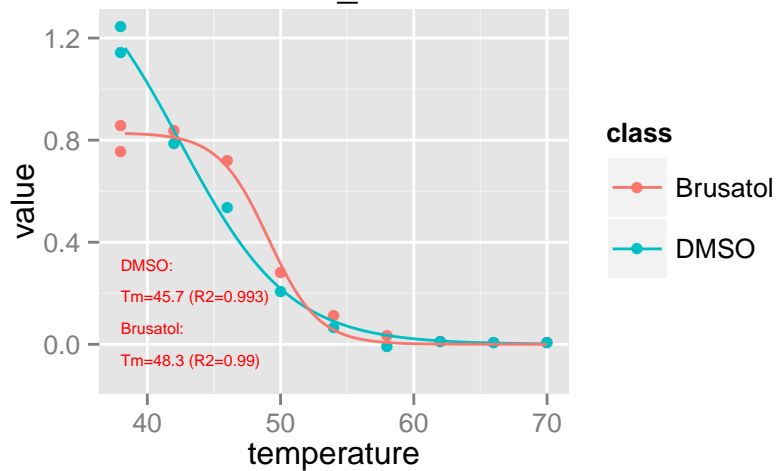

Prot: SYLC\_HUMAN

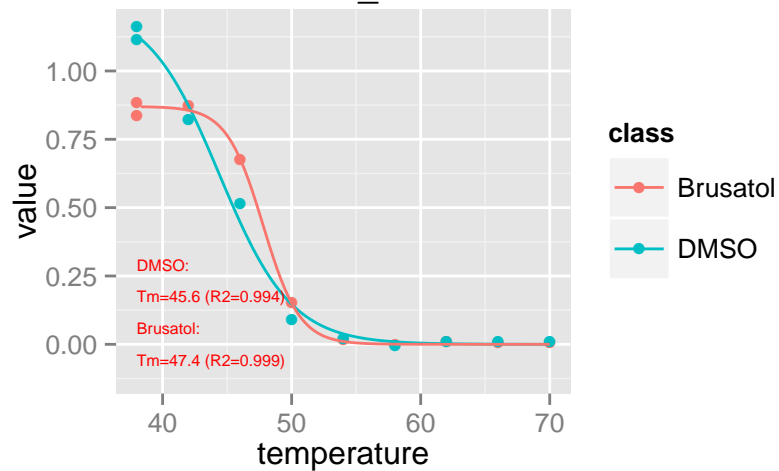

Prot: SYMC\_HUMAN

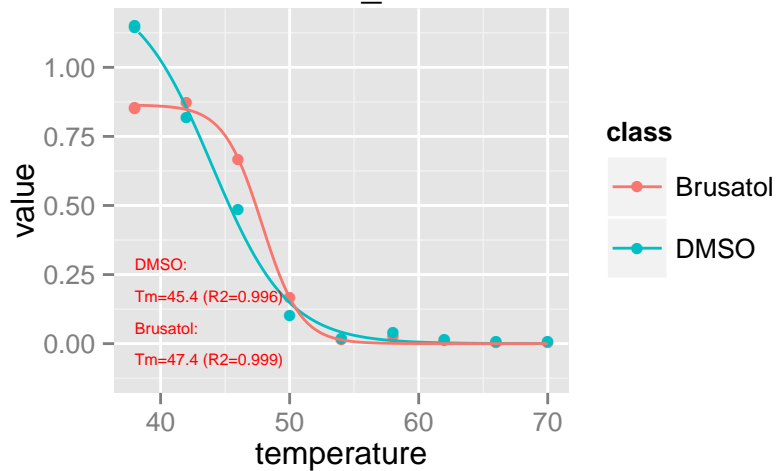

Prot: SYMM\_HUMAN

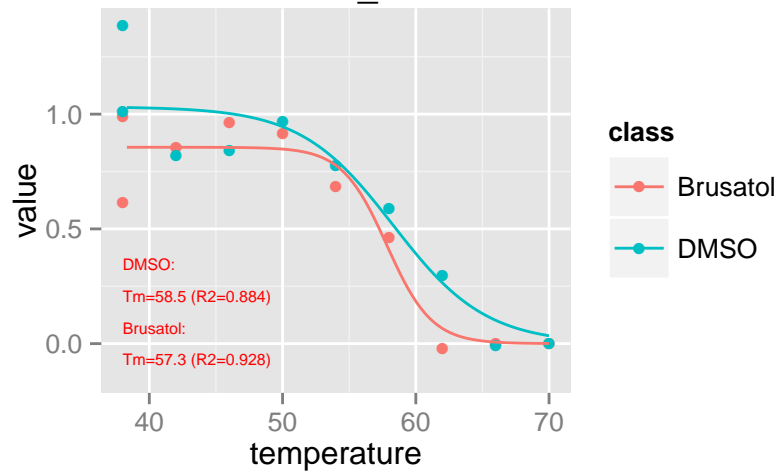

Prot: SYMPK\_HUMAN

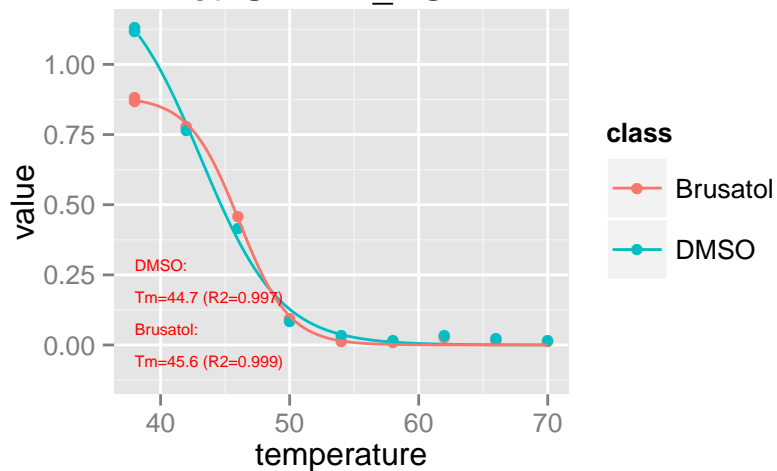

Prot: SYNC\_HUMAN

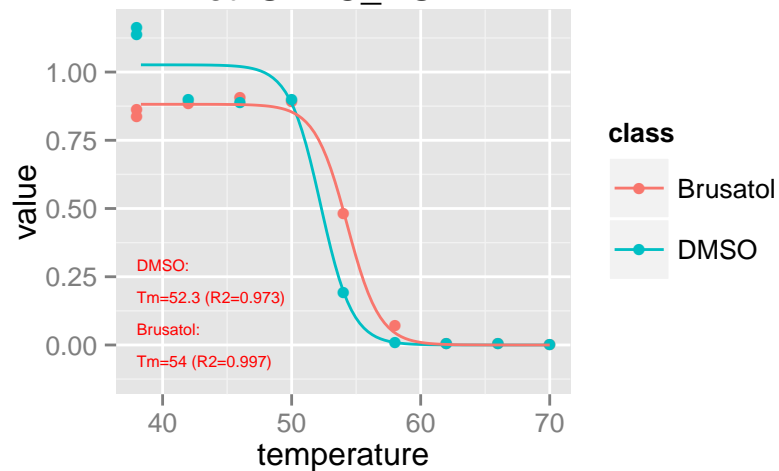

Prot: SYNE1\_HUMAN

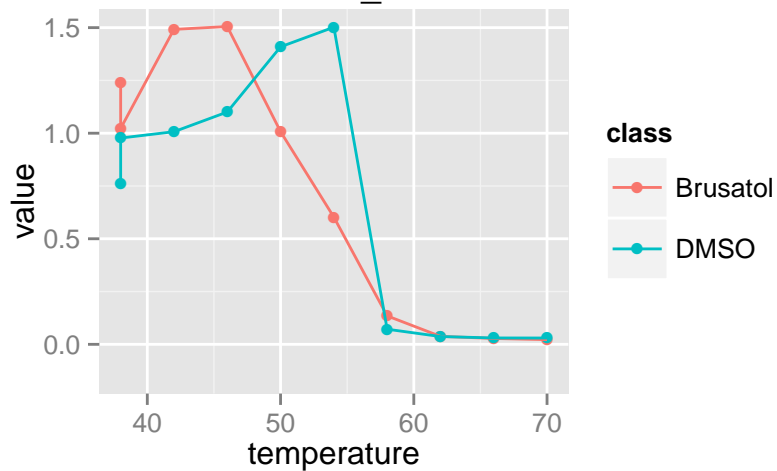

Prot: SYNJ2\_HUMAN

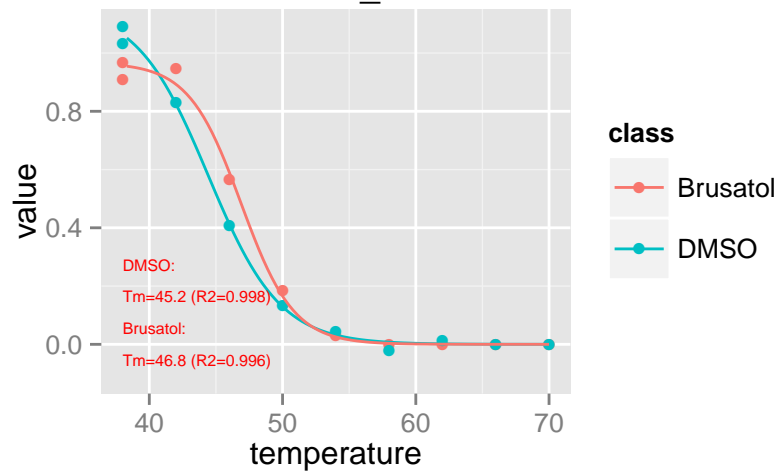

Prot: SYNM\_HUMAN

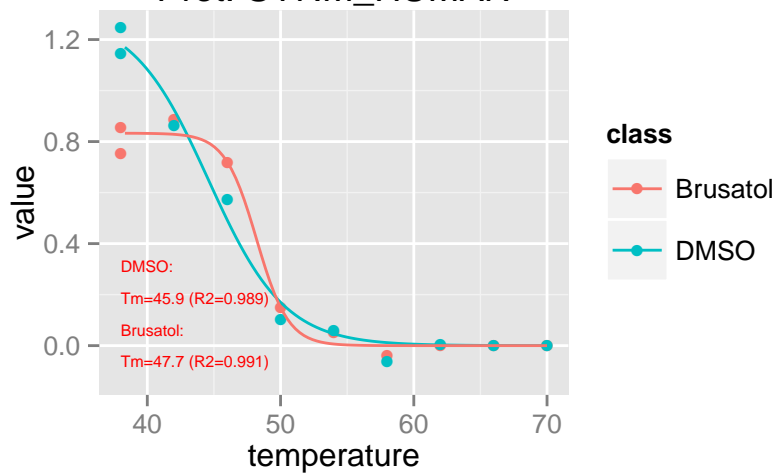

Prot: SYNRG\_HUMAN

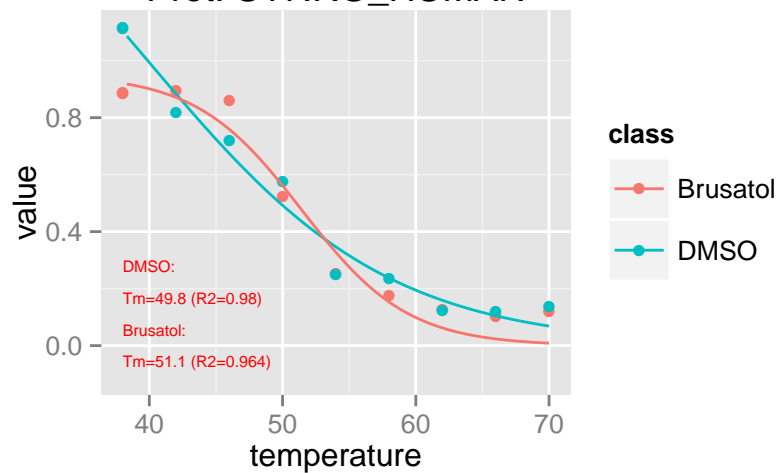

Prot: SYQ\_HUMAN

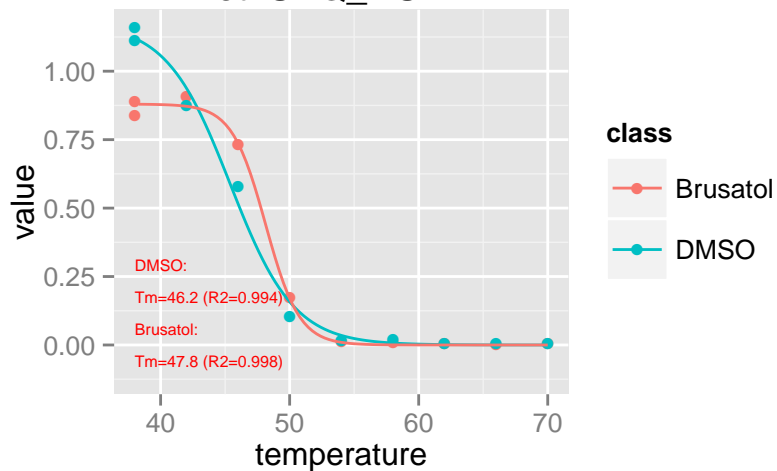

Prot: SYRC\_HUMAN

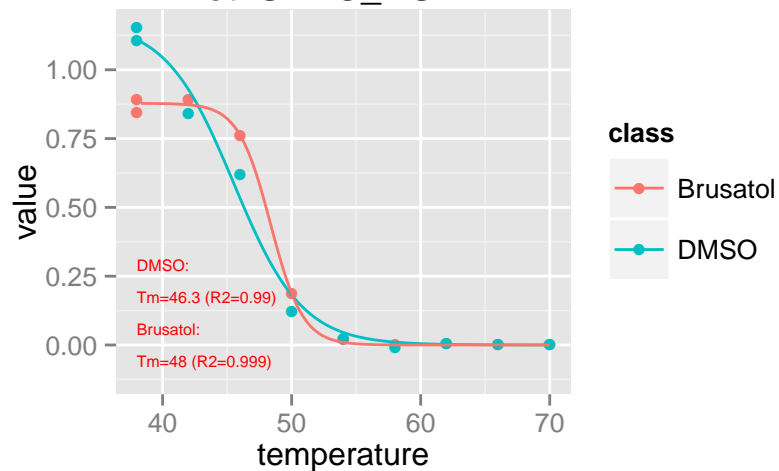

Prot: SYSC\_HUMAN

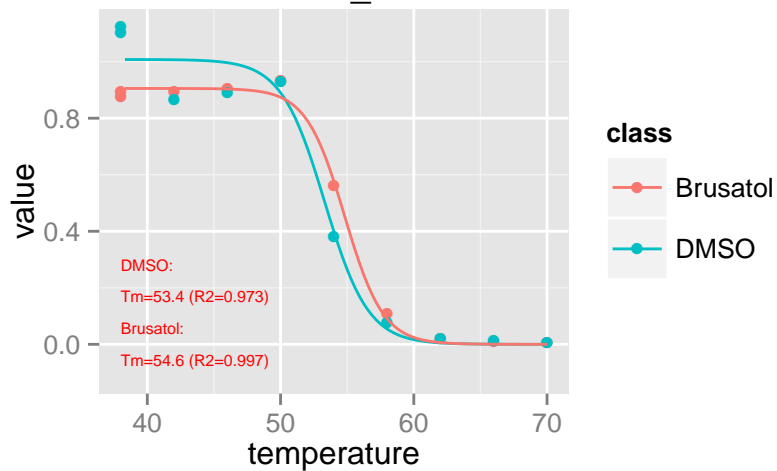

Prot: SYSM\_HUMAN

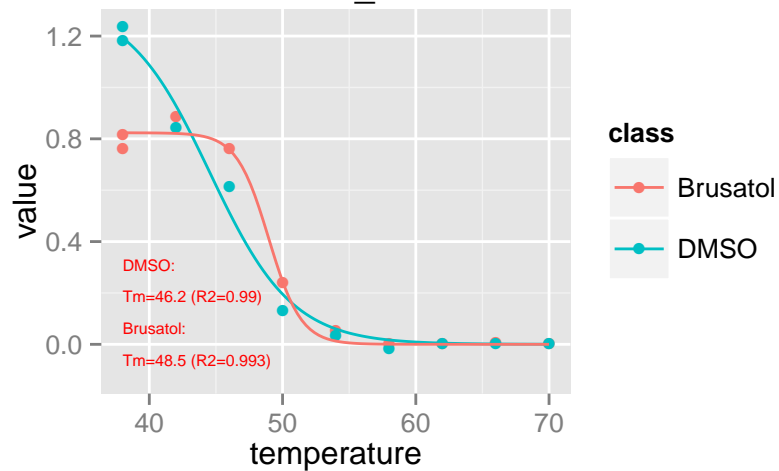



Prot: SYTC\_HUMAN

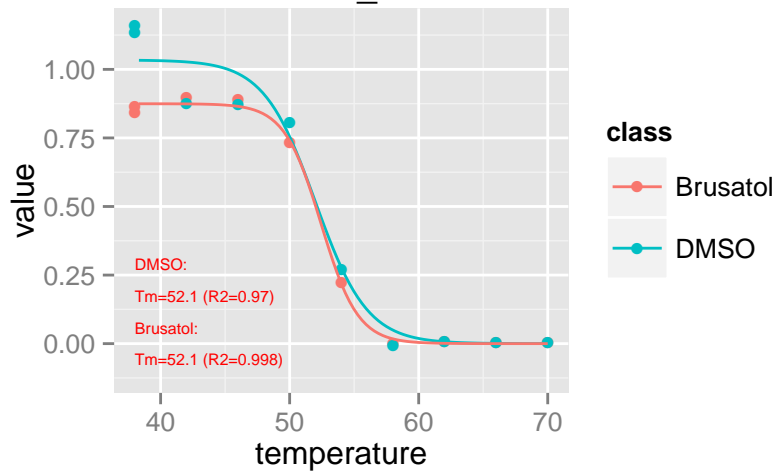

Prot: SYTC2\_HUMAN

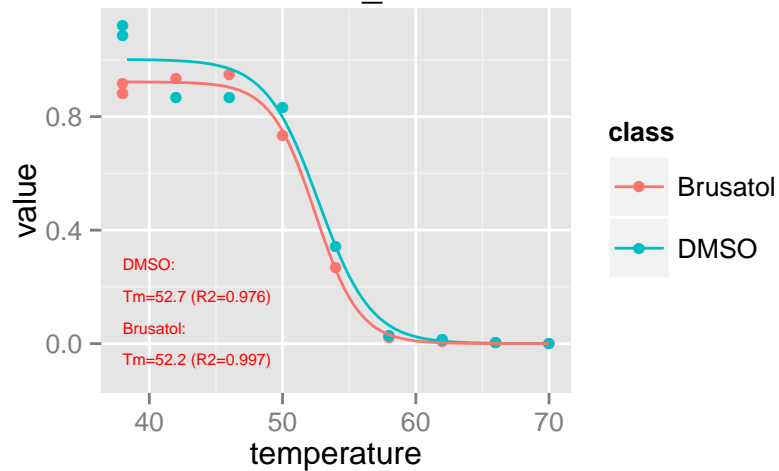

Prot: SYTM\_HUMAN

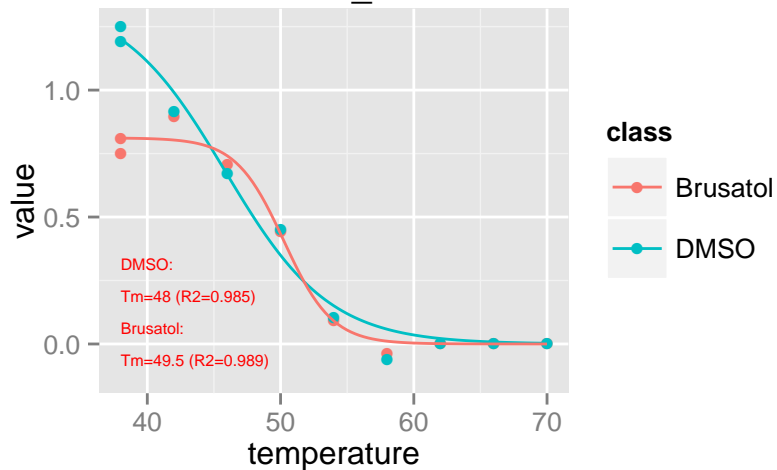

Prot: SYUG\_HUMAN

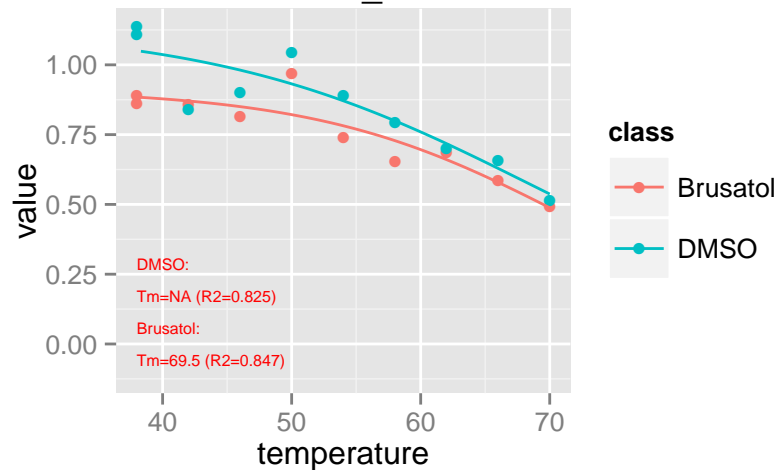

Prot: SYVC\_HUMAN

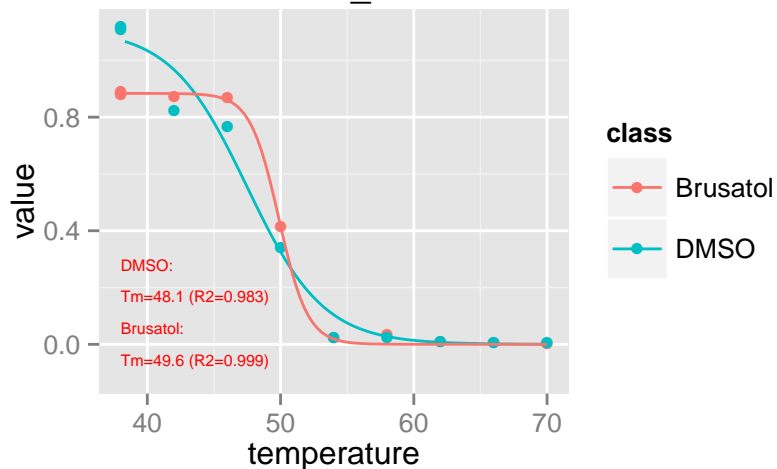

Prot: SYWC\_HUMAN

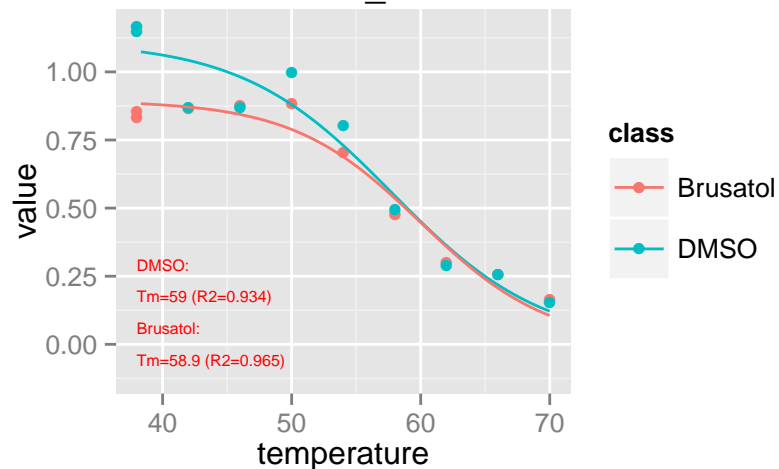

Prot: SYYC\_HUMAN

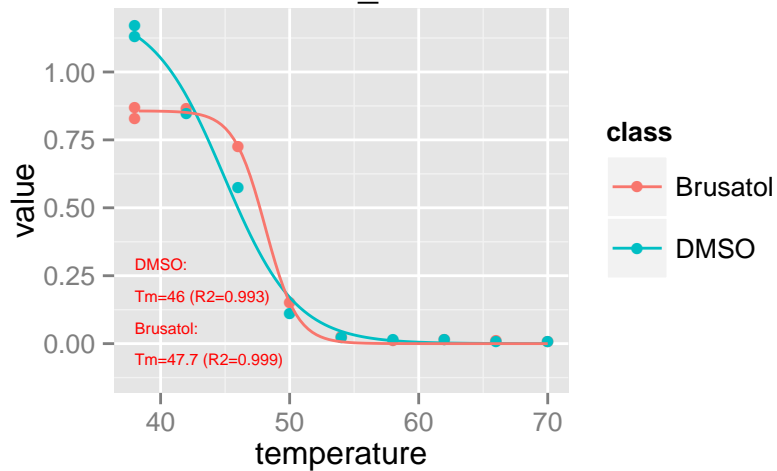

Prot: SYYM\_HUMAN

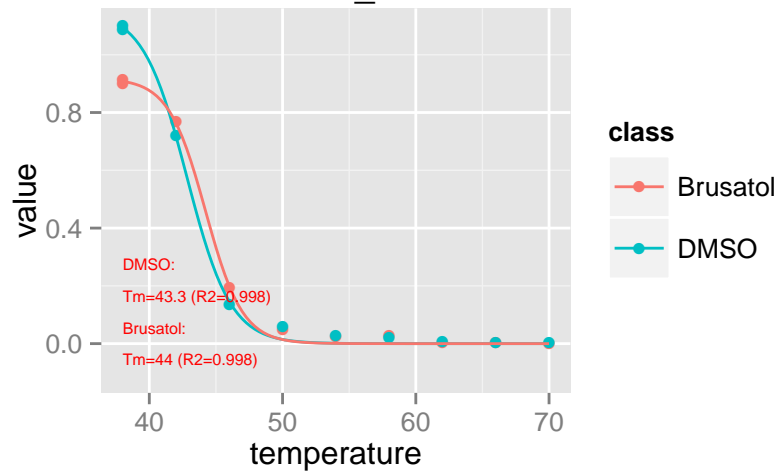

Prot: T11L1\_HUMAN

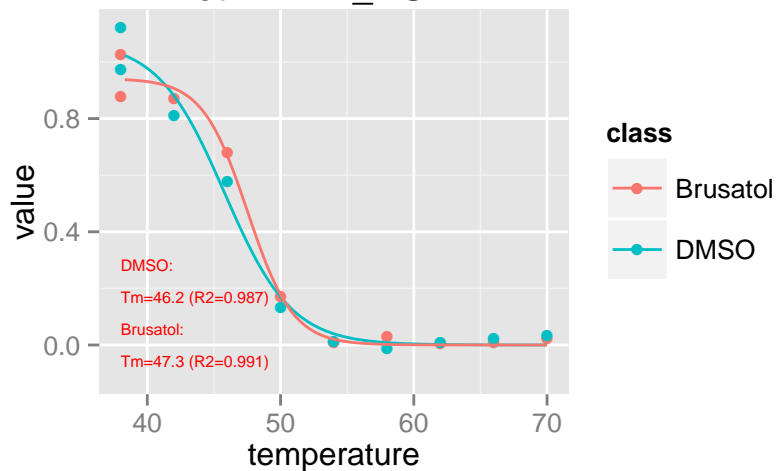

Prot: T22D1\_HUMAN

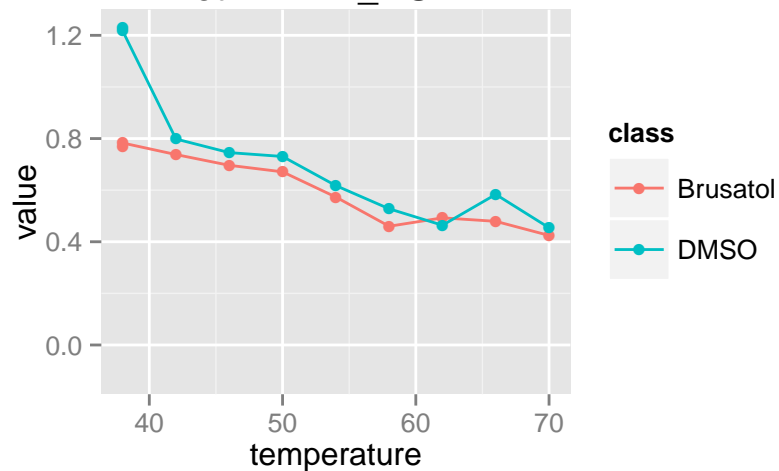

Prot: T22D2\_HUMAN

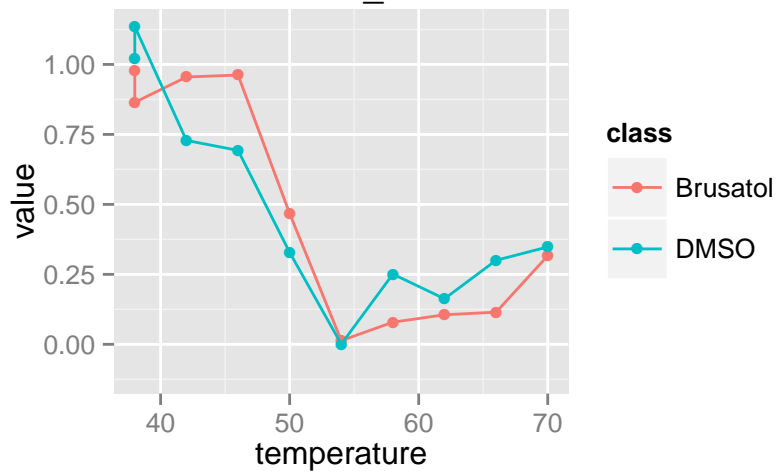

Prot: T2AG\_HUMAN

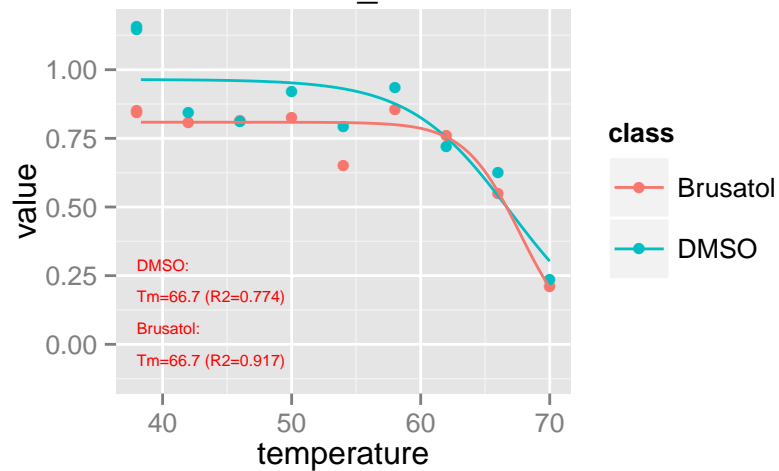

Prot: T2EA\_HUMAN

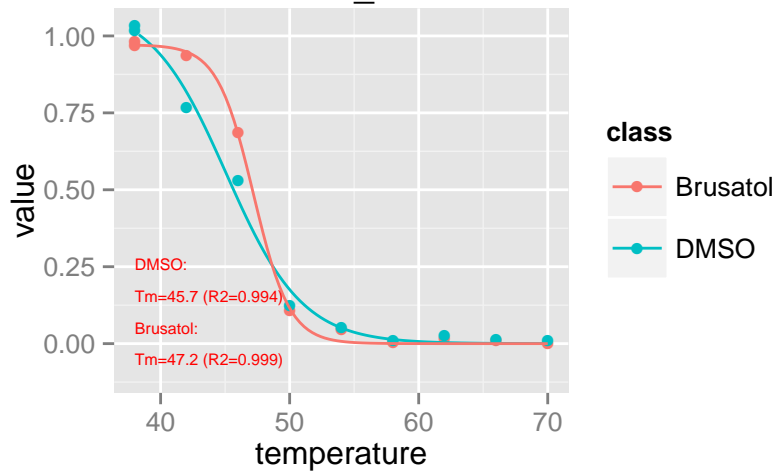

Prot: T2EB\_HUMAN

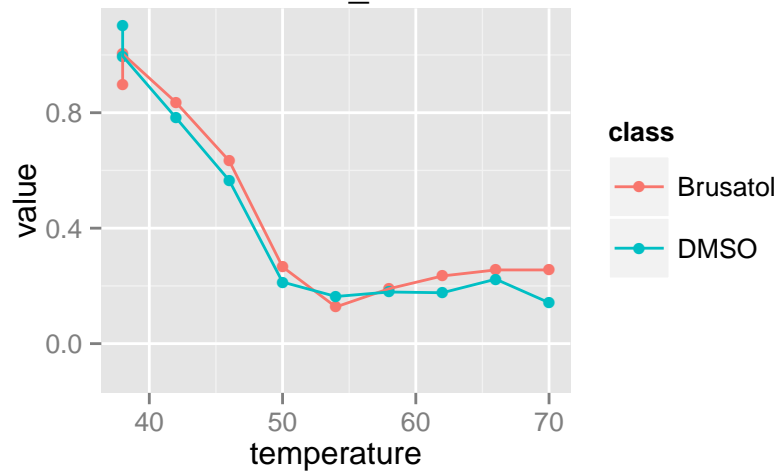

Prot: T2FA\_HUMAN

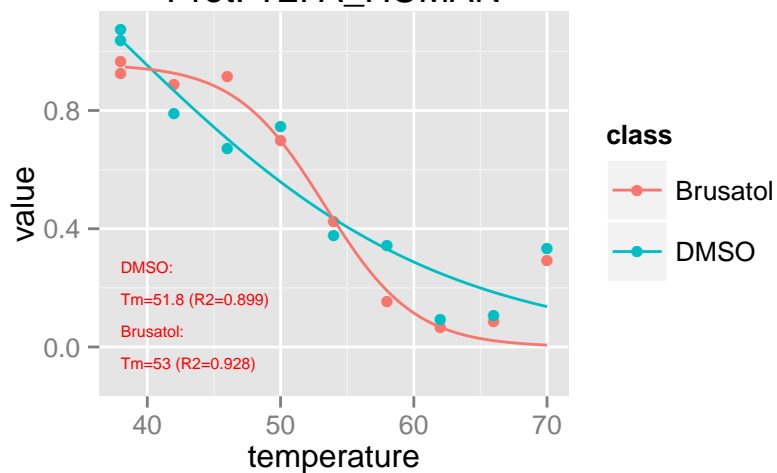

Prot: T2FB\_HUMAN

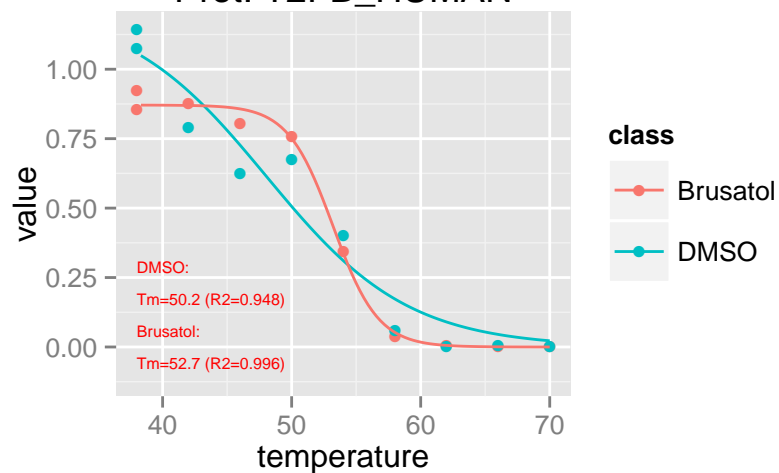

Prot: T4AF1\_HUMAN

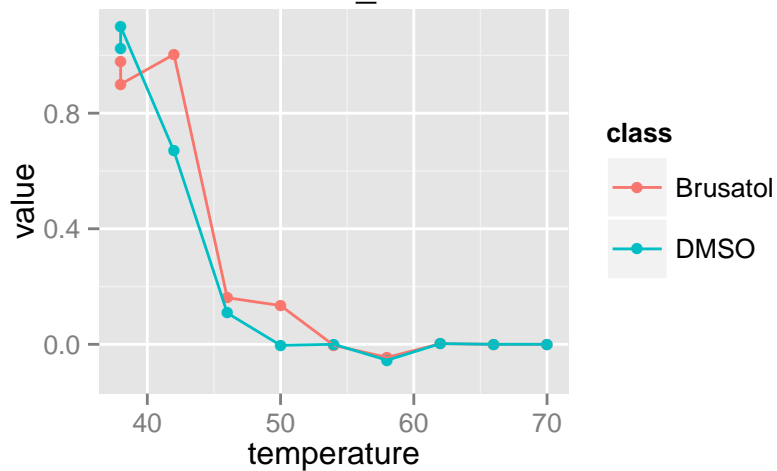

Prot: TAB1\_HUMAN

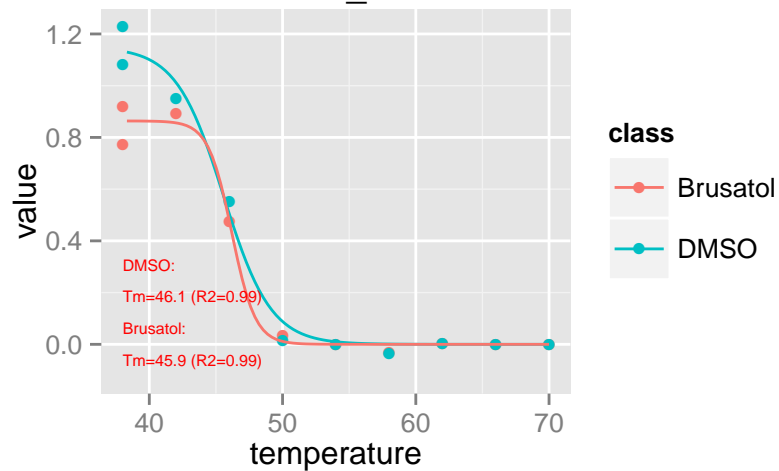

Prot: TACC1\_HUMAN

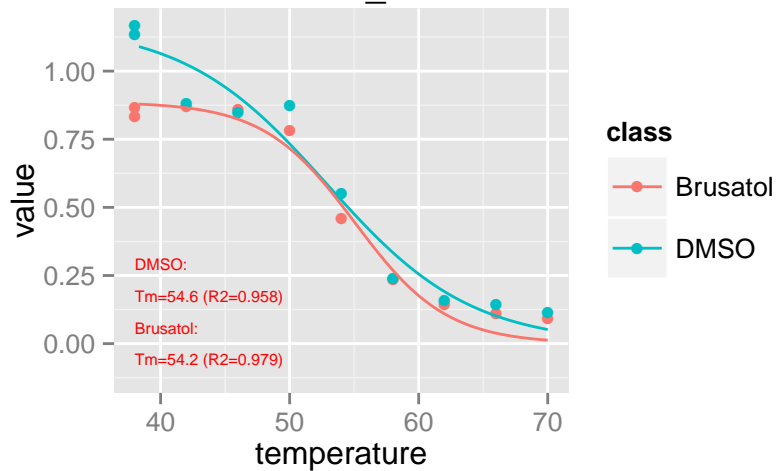

Prot: TACC2\_HUMAN

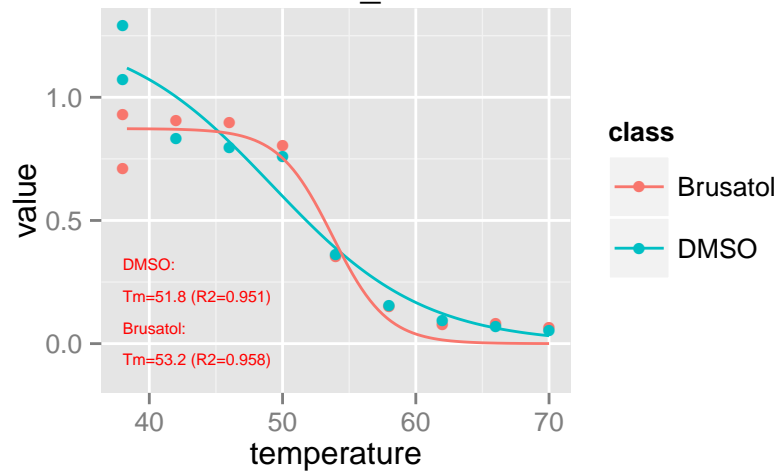

Prot: TACC3\_HUMAN

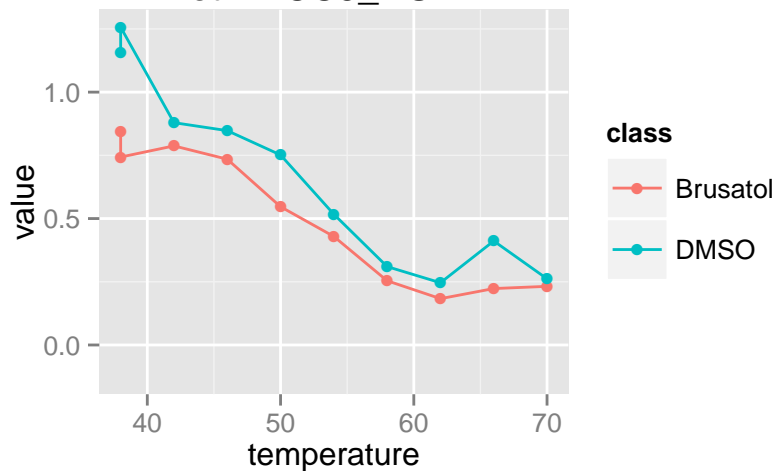

Prot: TACO1\_HUMAN

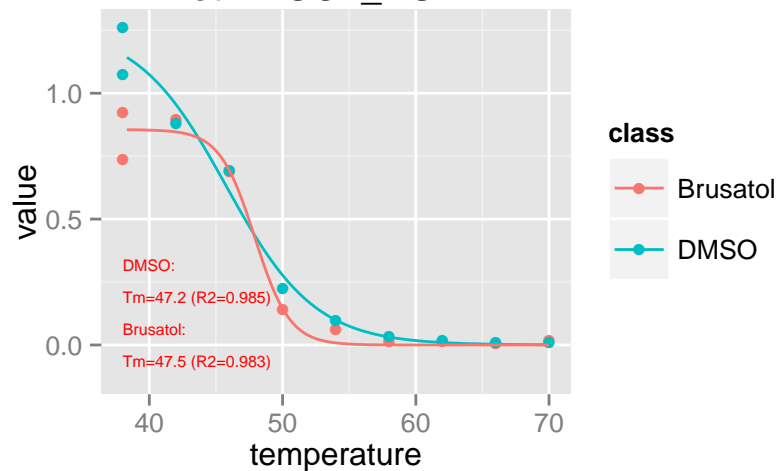

Prot: TADBP\_HUMAN

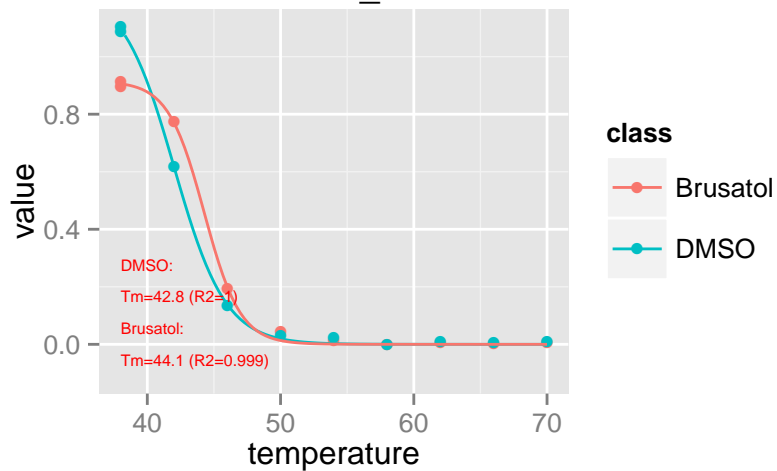

Prot: TAF10\_HUMAN

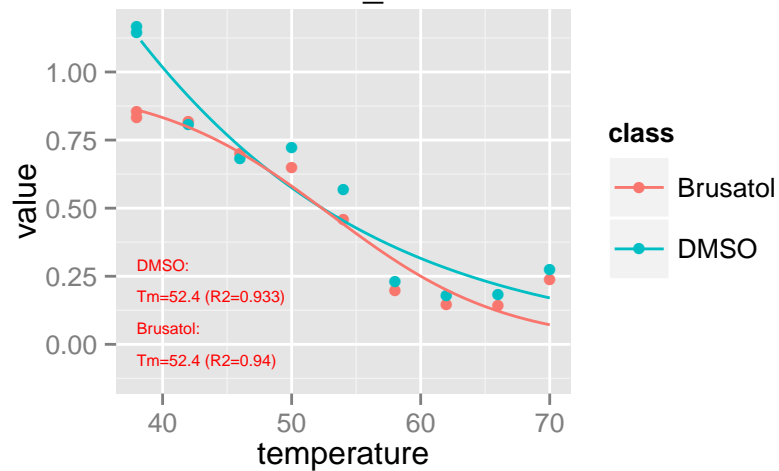

Prot: TAGL\_HUMAN

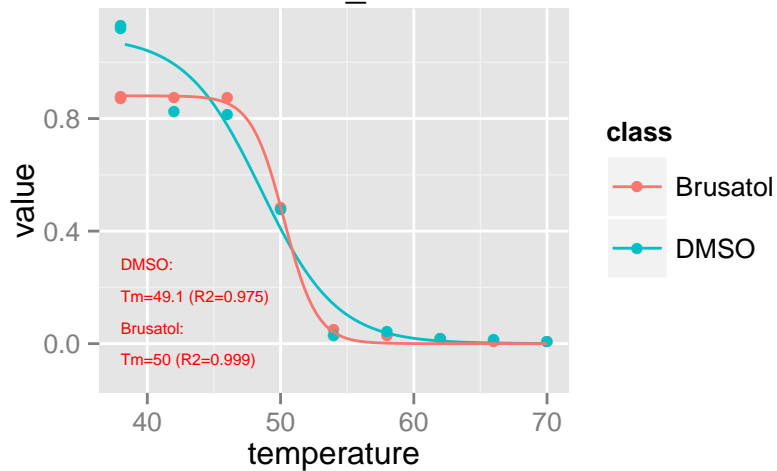

Prot: TAGL2\_HUMAN

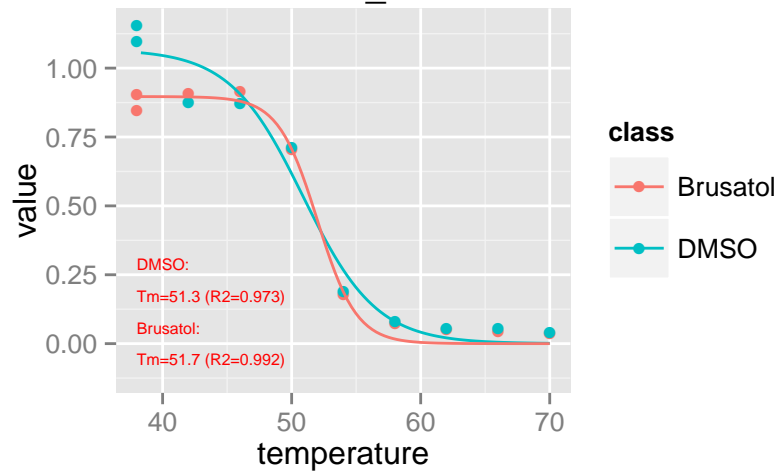

Prot: TALDO\_HUMAN

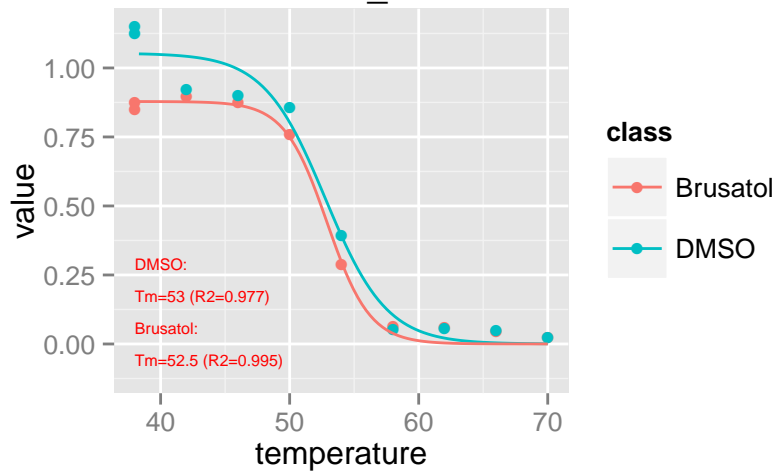

Prot: TAOK1\_HUMAN

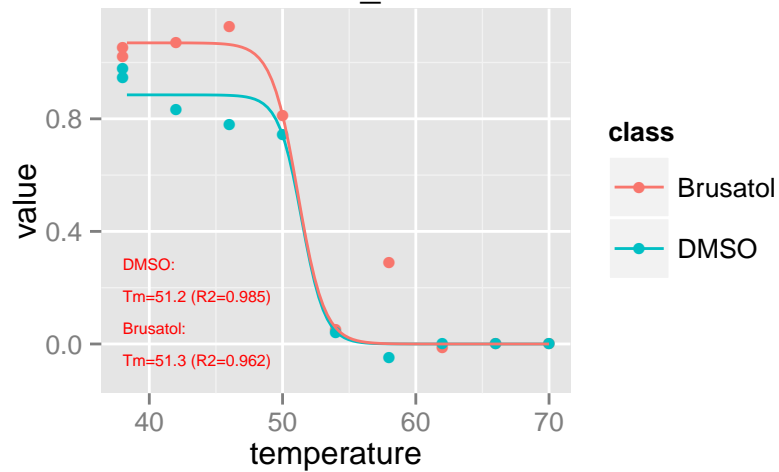

Prot: TARA\_HUMAN

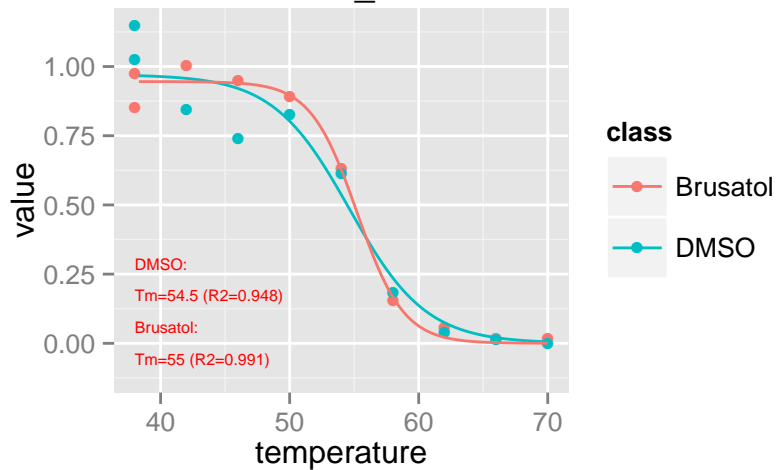

Prot: TATD1\_HUMAN

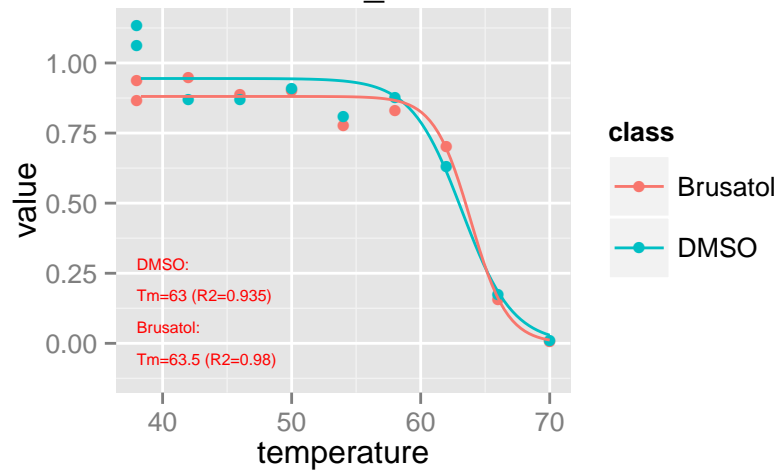

Prot: TAU\_HUMAN

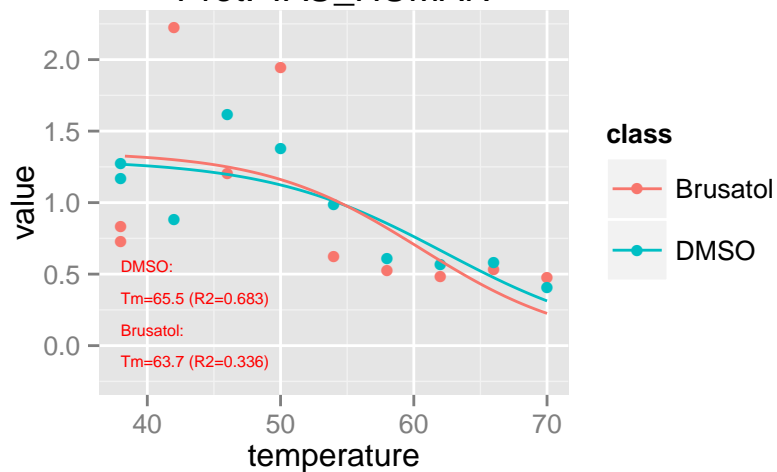

Prot: TB10B\_HUMAN

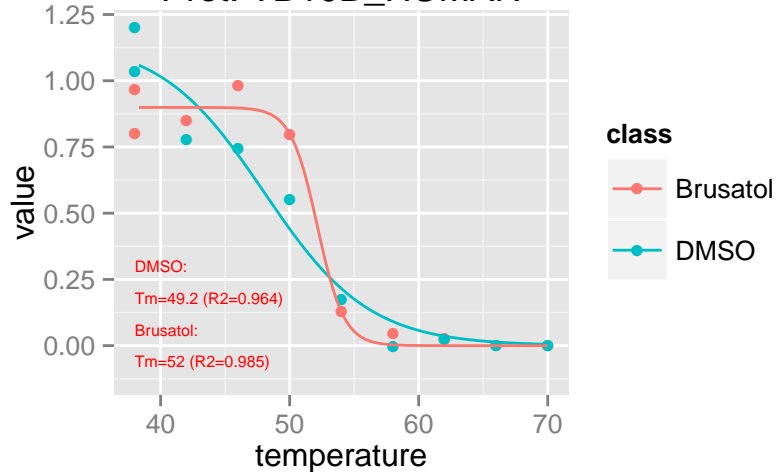

Prot: TB182\_HUMAN

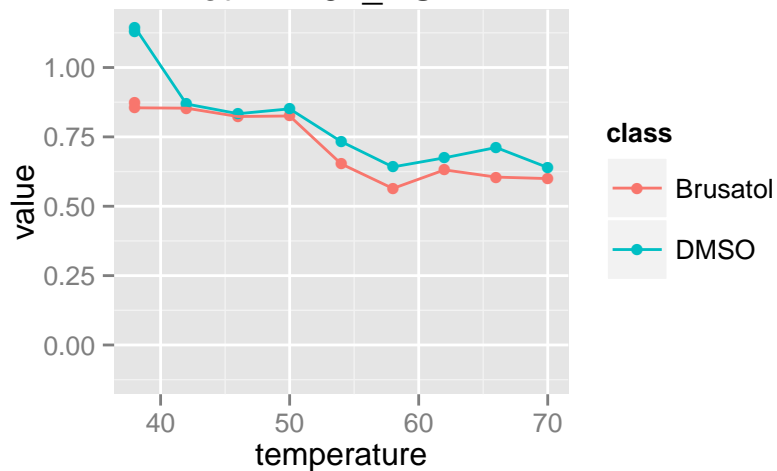

Prot: TB22A\_HUMAN

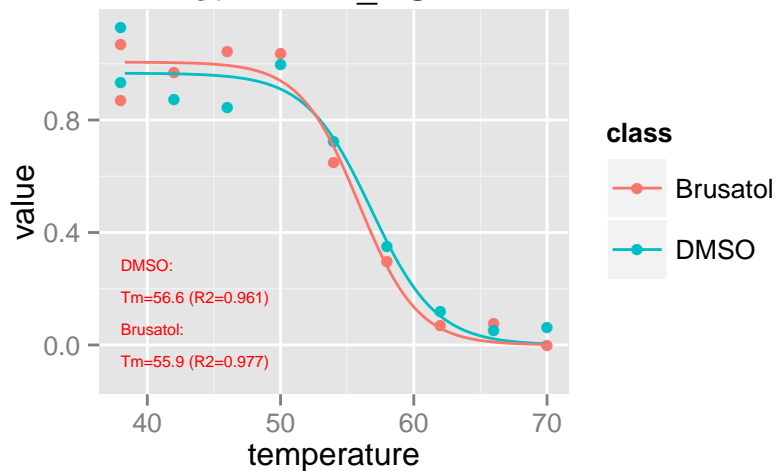

Prot: TBA1A\_HUMAN

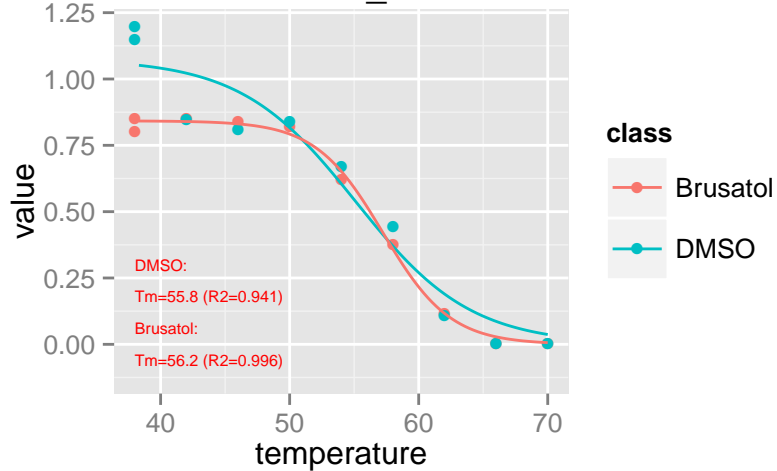

Prot: TBA1B\_HUMAN

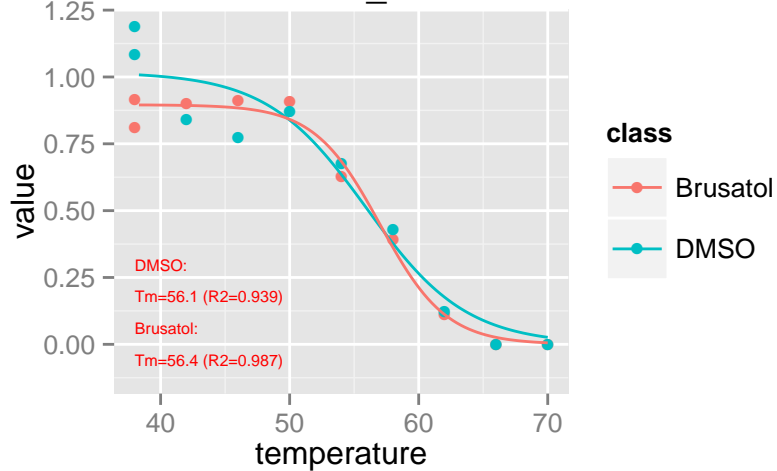

Prot: TBA1C\_HUMAN

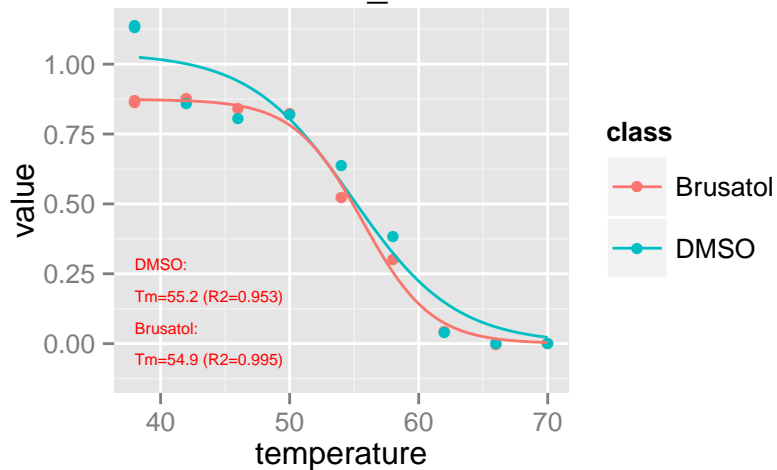

Prot: TBA4A\_HUMAN

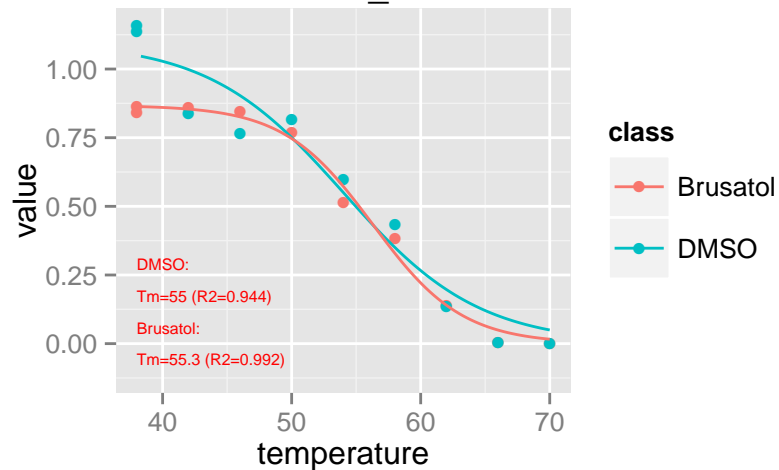

Prot: TBAL3\_HUMAN

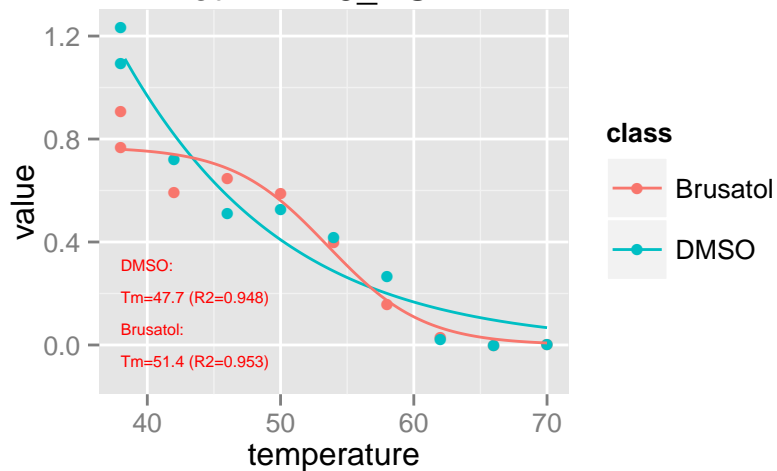

Prot: TBB1\_HUMAN

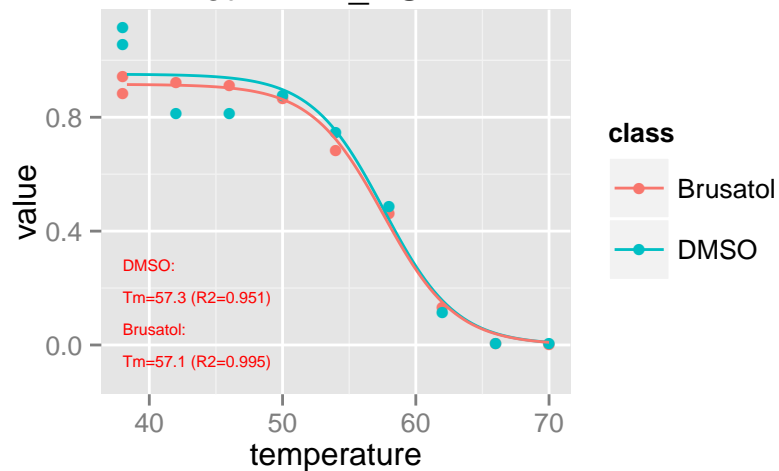

Prot: TBB2A\_HUMAN

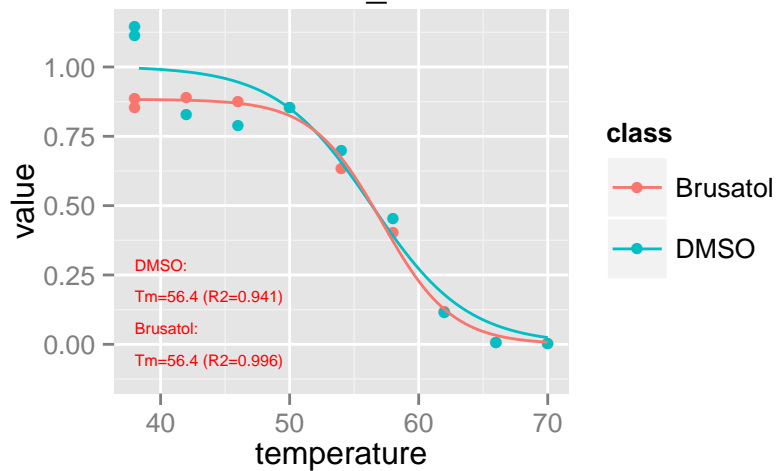

Prot: TBB3\_HUMAN

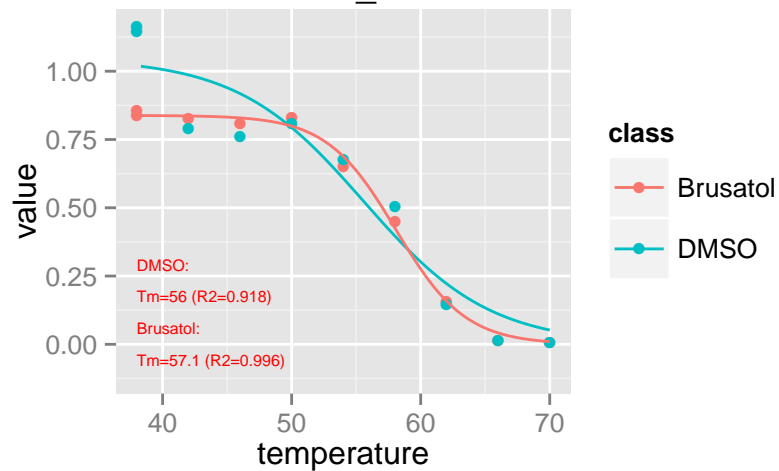

Prot: TBB4A\_HUMAN

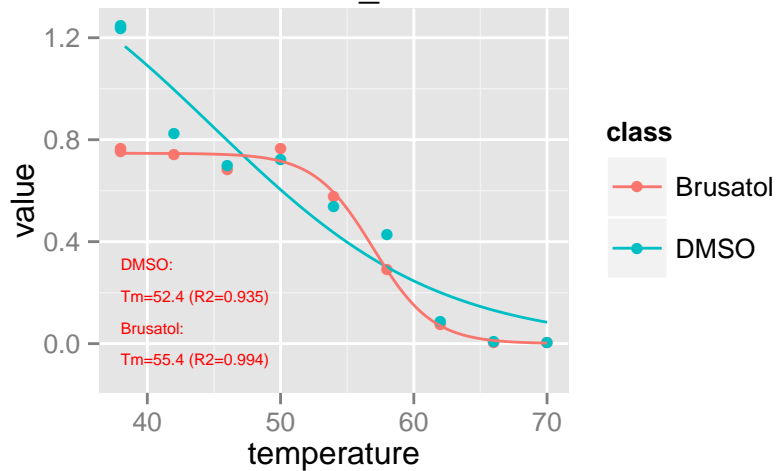

Prot: TBB4B\_HUMAN

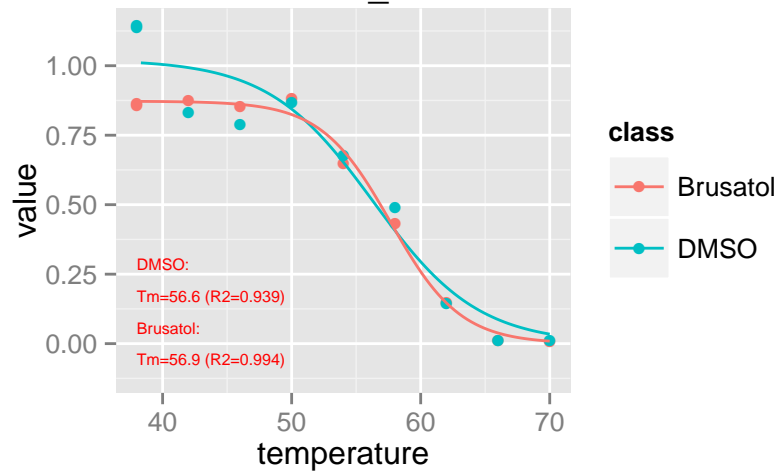

Prot: TBB5\_HUMAN

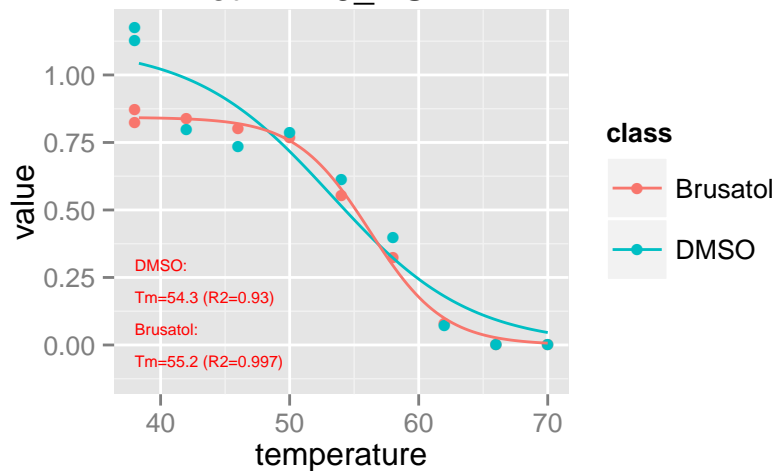

Prot: TBB6\_HUMAN

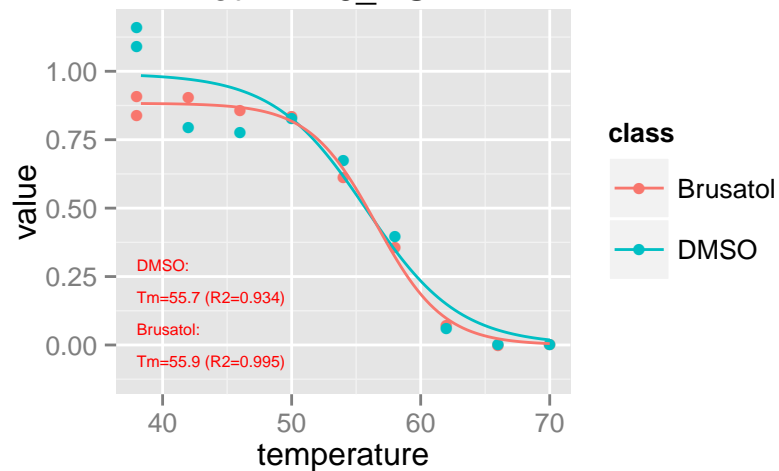

Prot: TBC13\_HUMAN

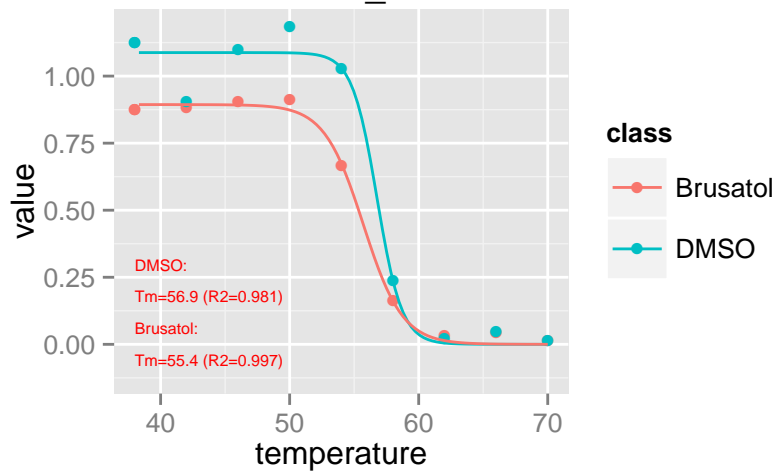

Prot: TBC15\_HUMAN

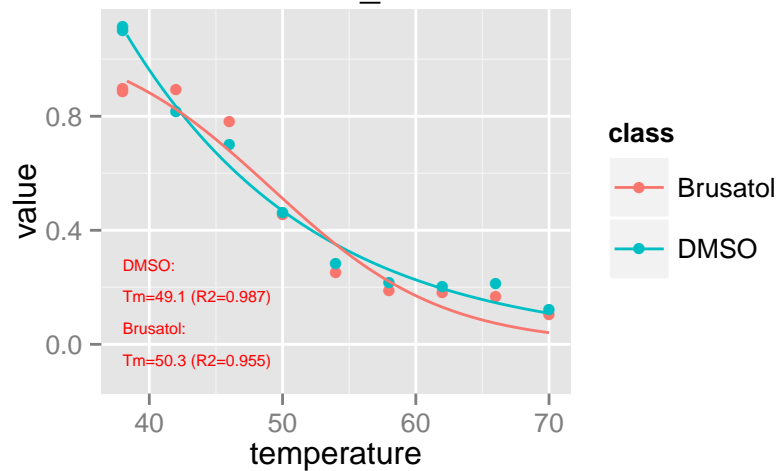



Prot: TBC23\_HUMAN

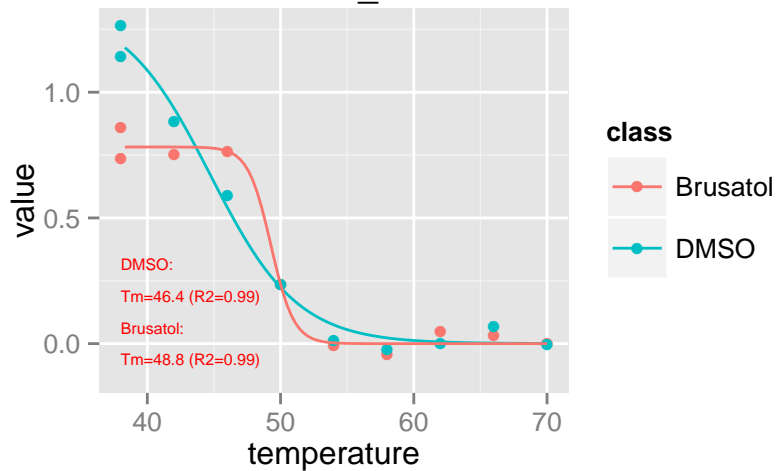

Prot: TBC9B\_HUMAN

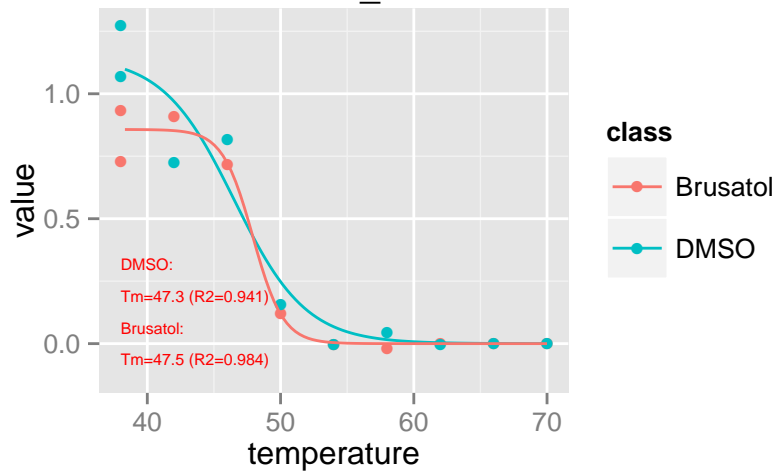

Prot: TBCA\_HUMAN

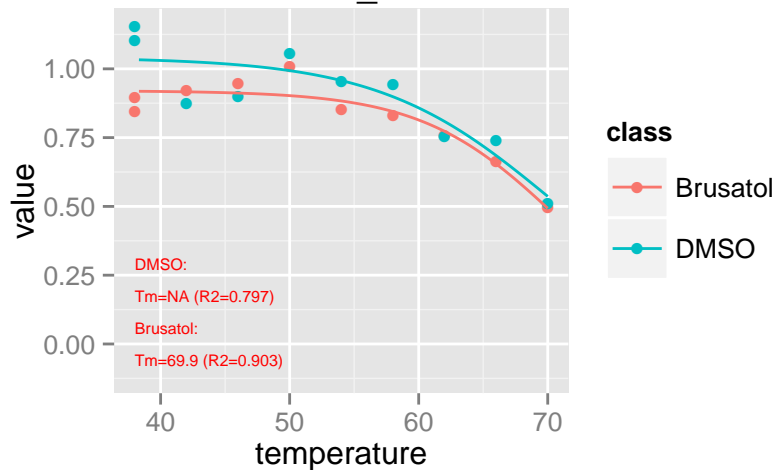

Prot: TBCB\_HUMAN

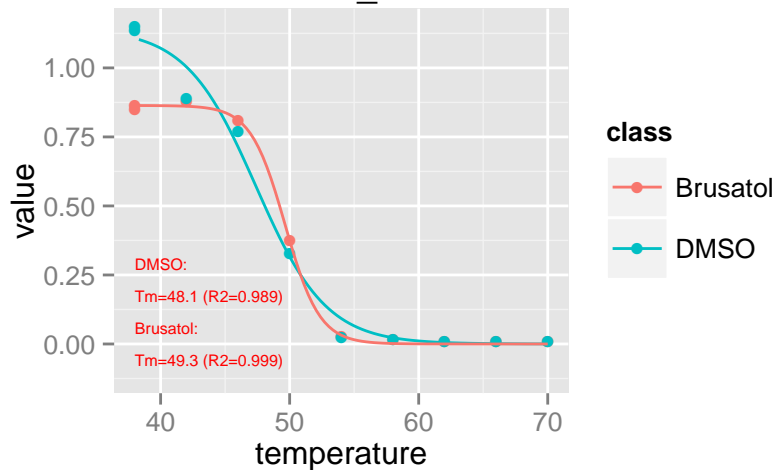

Prot: TBCC\_HUMAN

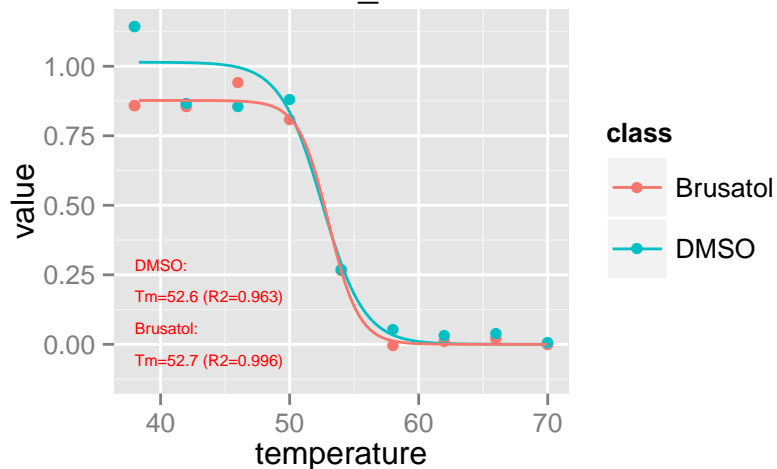

Prot: TBCCD\_HUMAN

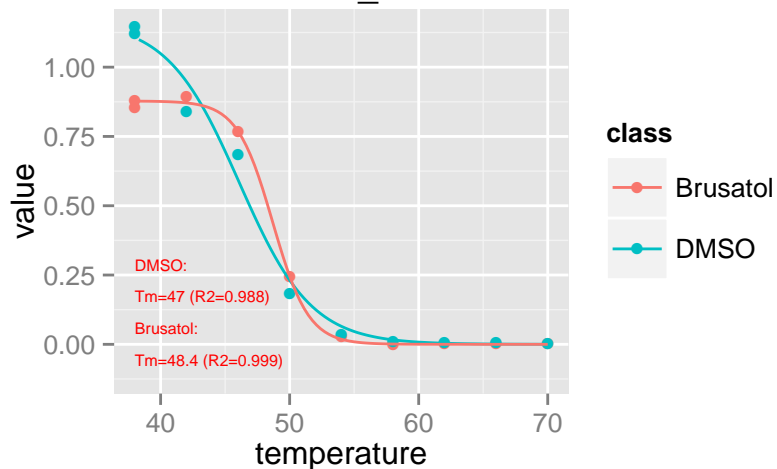

Prot: TBCD4\_HUMAN

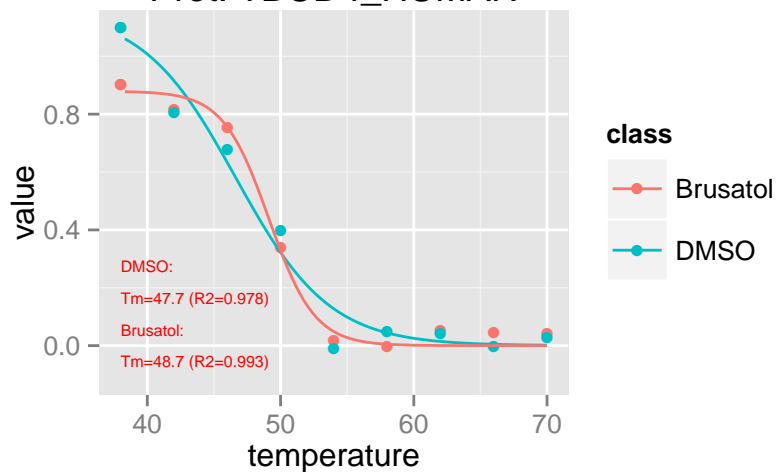

Prot: TBCD5\_HUMAN

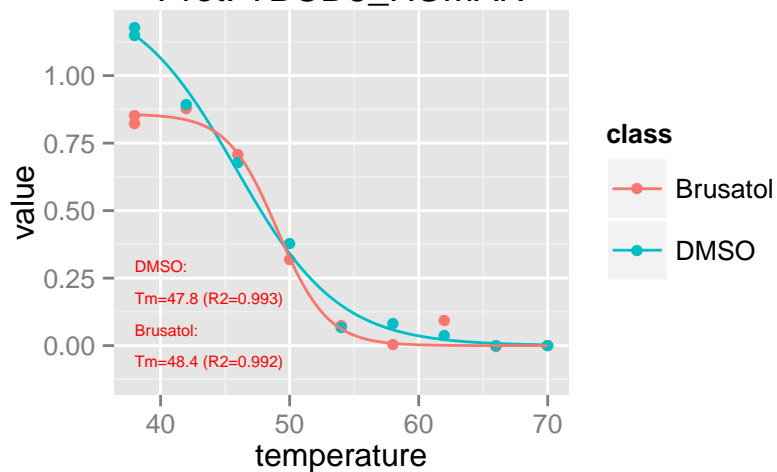

Prot: TBCD8\_HUMAN

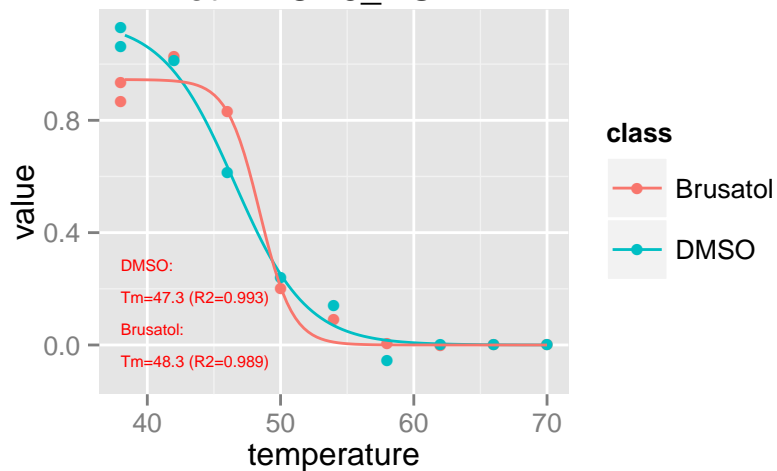

Prot: TBCE\_HUMAN

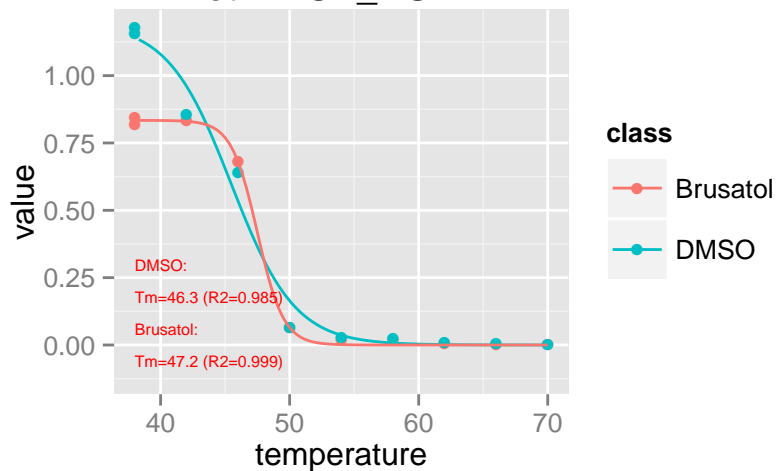

Prot: TBCK\_HUMAN

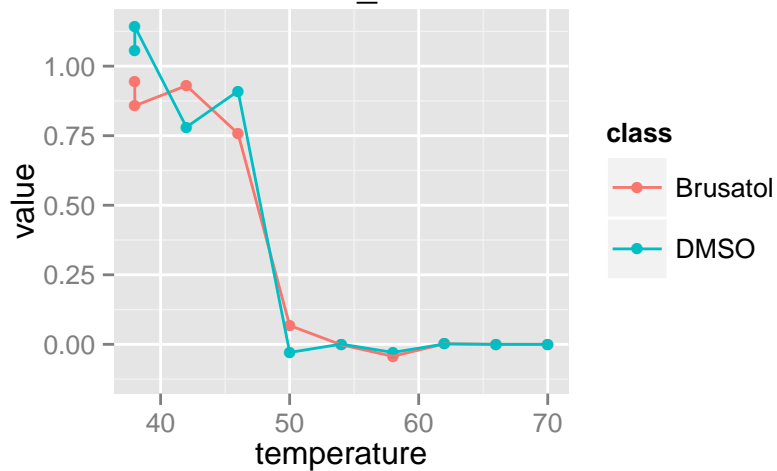

Prot: TBG1\_HUMAN

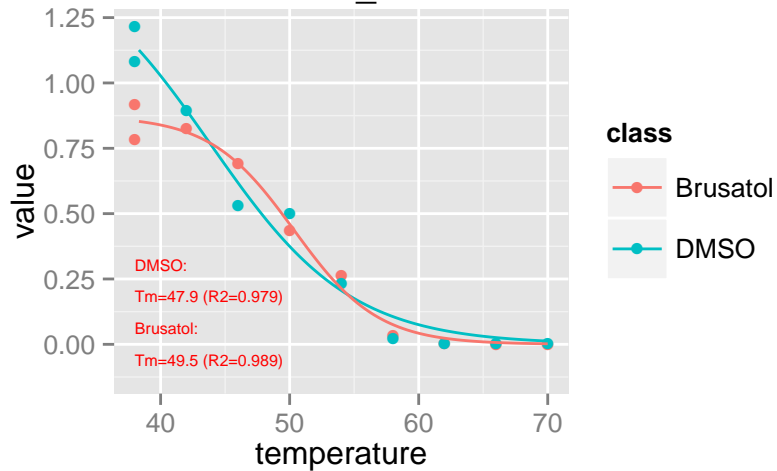

Prot: TBK1\_HUMAN

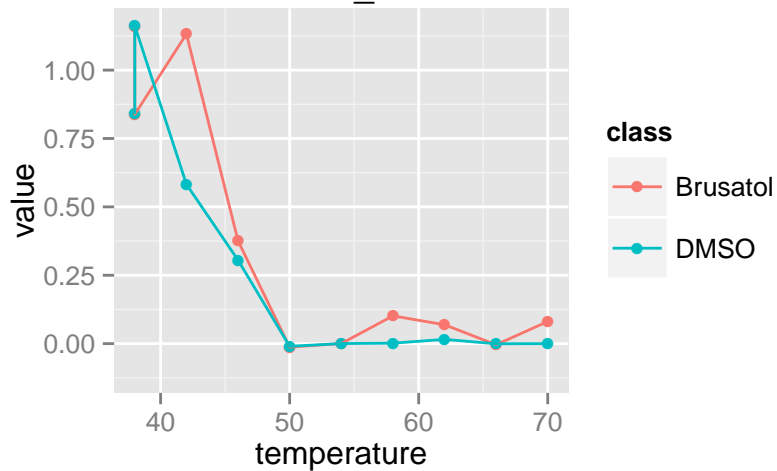

Prot: TBL1R\_HUMAN

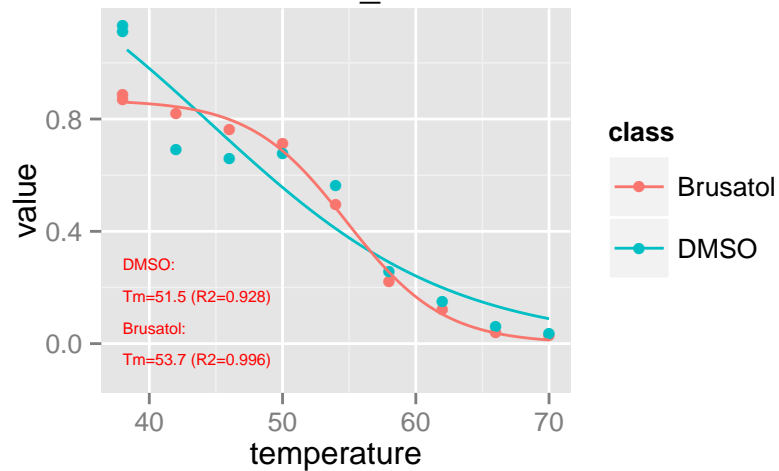

Prot: TBL1X\_HUMAN

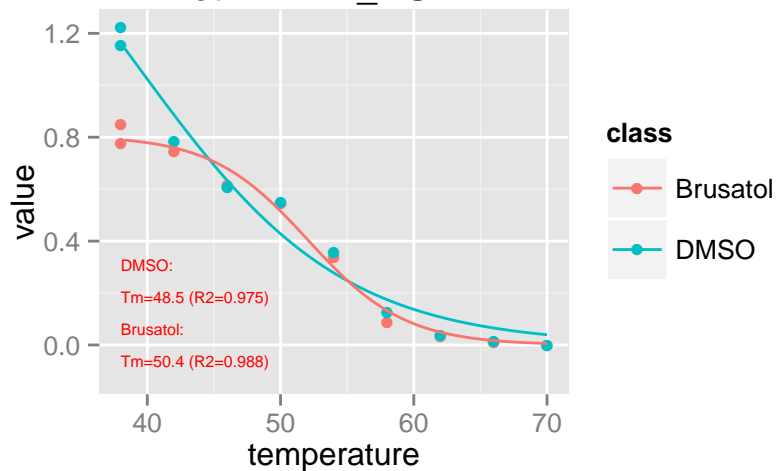

Prot: TBRG4\_HUMAN

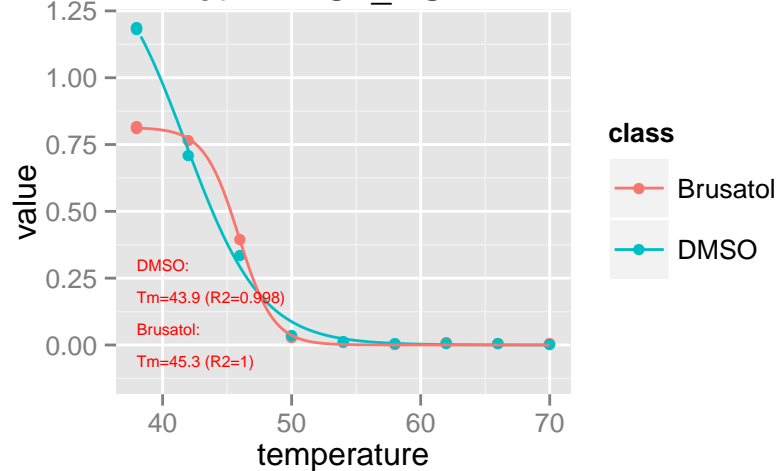

Prot: TCAL3\_HUMAN

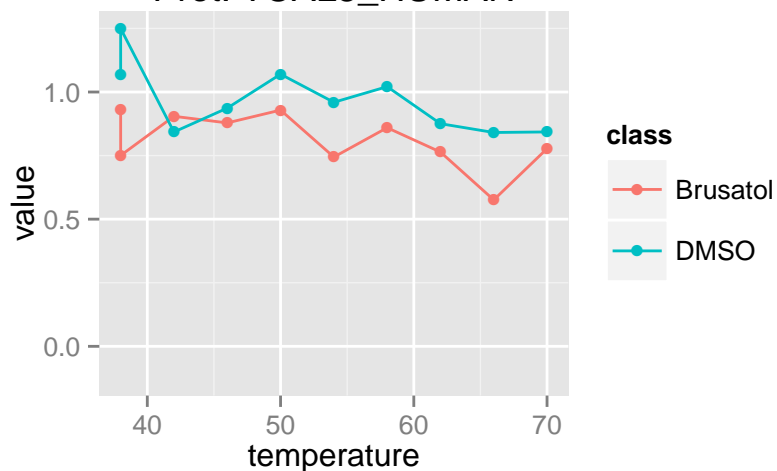

Prot: TCAL4\_HUMAN

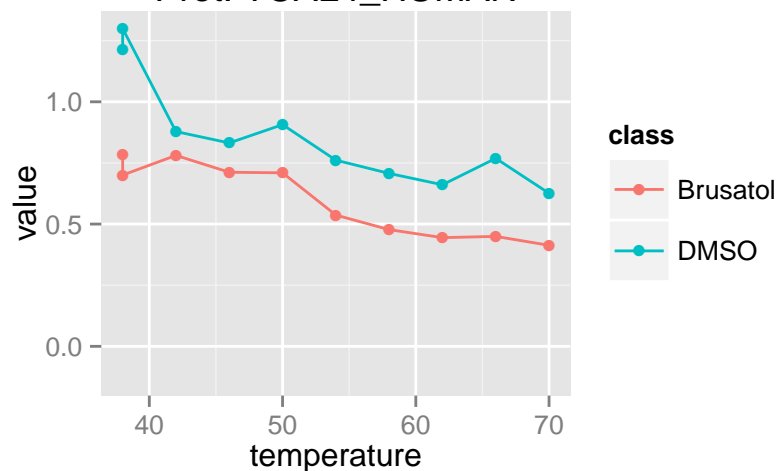

Prot: TCEA1\_HUMAN

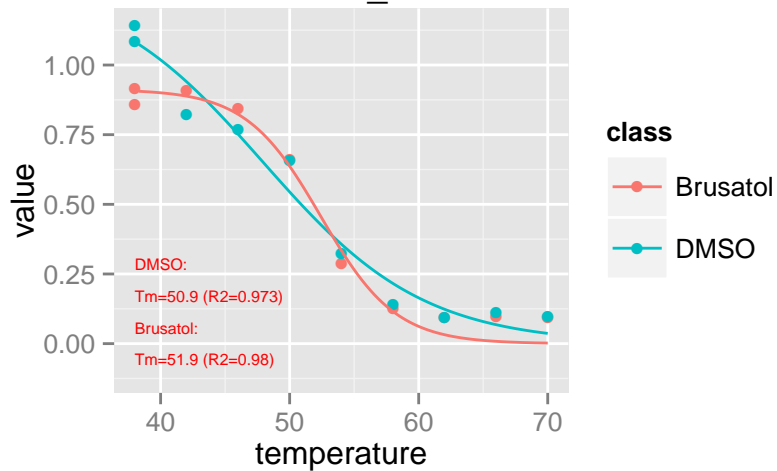

Prot: TCOF\_HUMAN

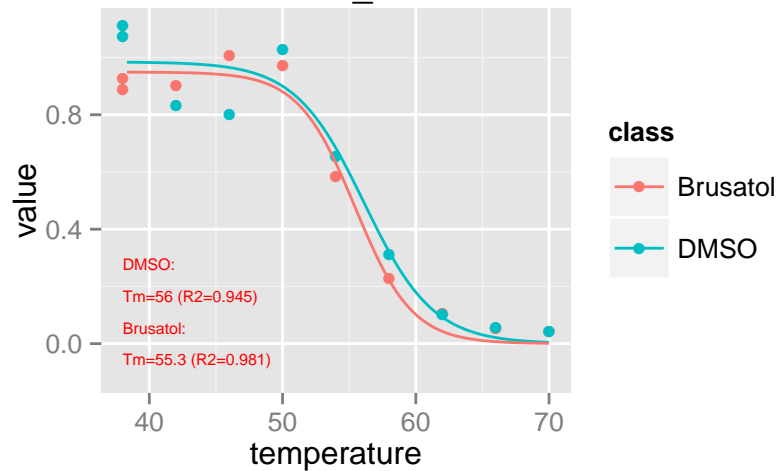

Prot: TCP4\_HUMAN

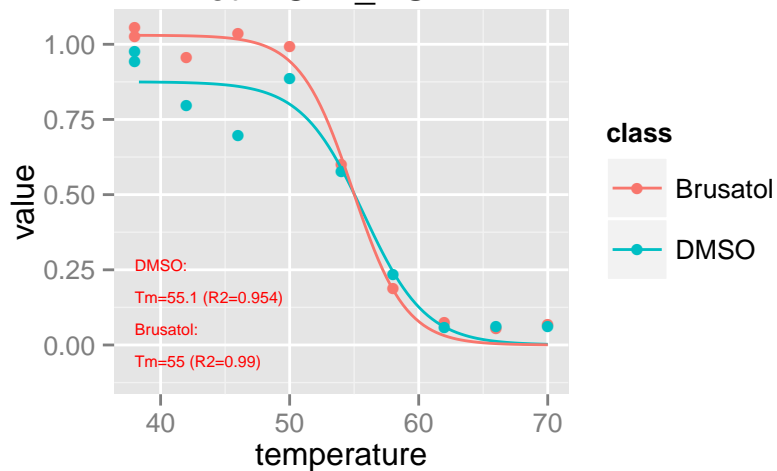

Prot: TCPA\_HUMAN

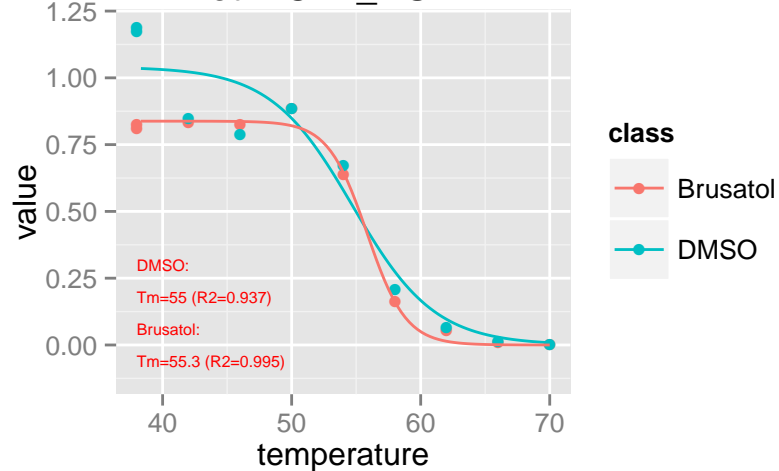

Prot: TCPB\_HUMAN

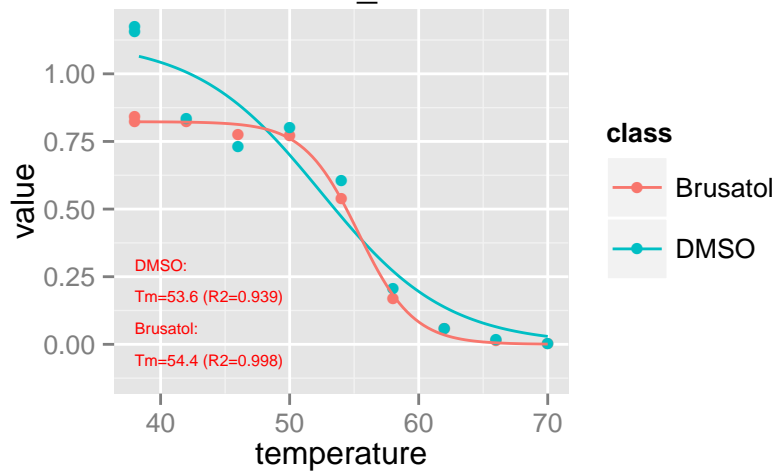

Prot: TCPD\_HUMAN

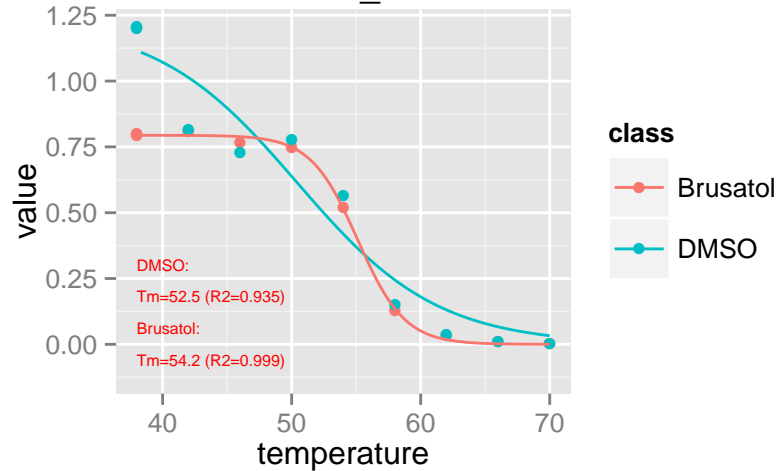

Prot: TCPE\_HUMAN

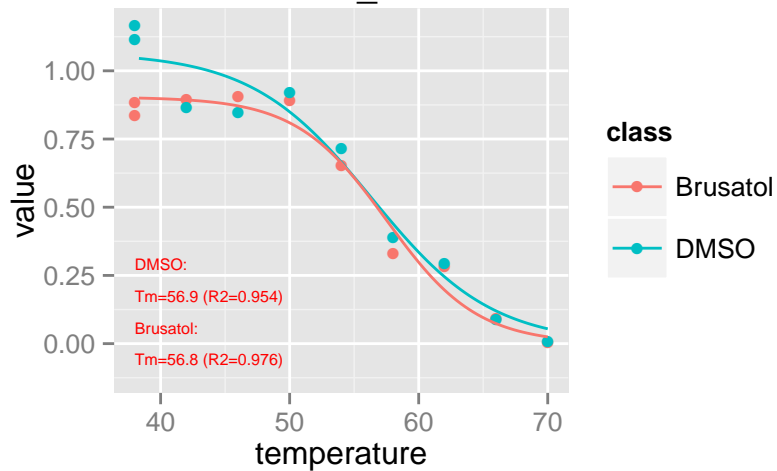

Prot: TCPG\_HUMAN

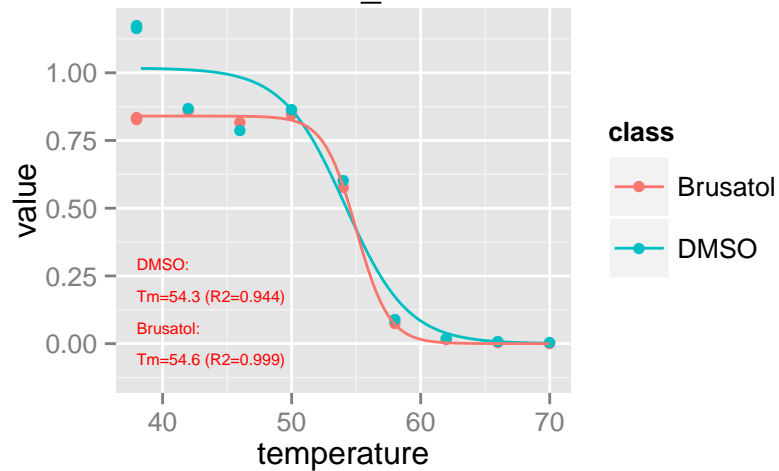

Prot: TCPH\_HUMAN

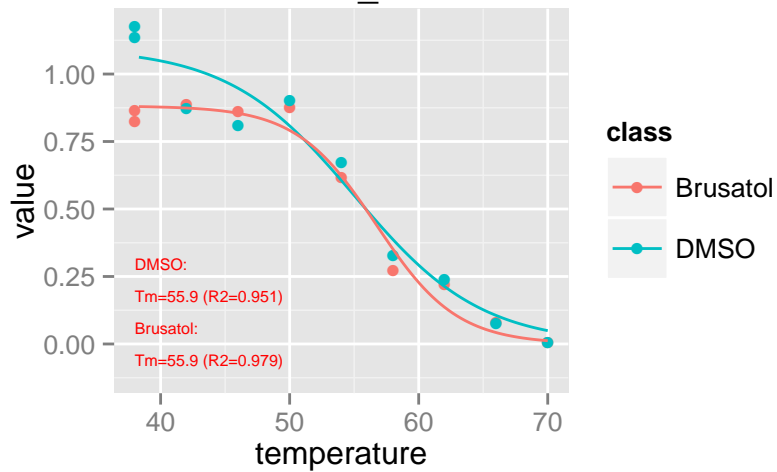

Prot: TCPQ\_HUMAN

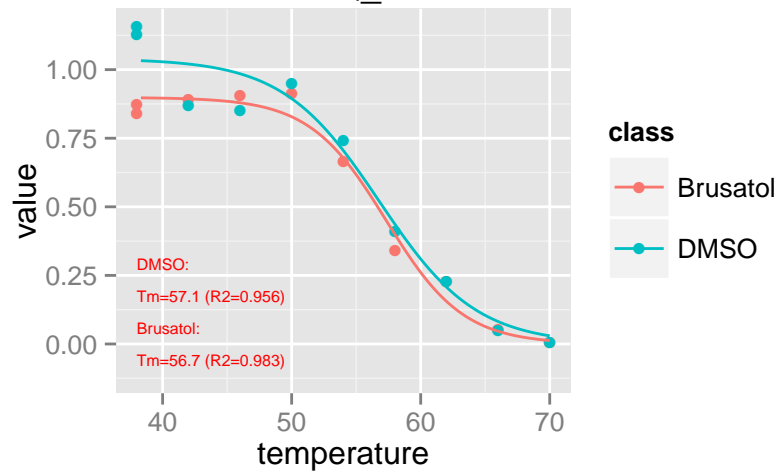

Prot: TCPW\_HUMAN

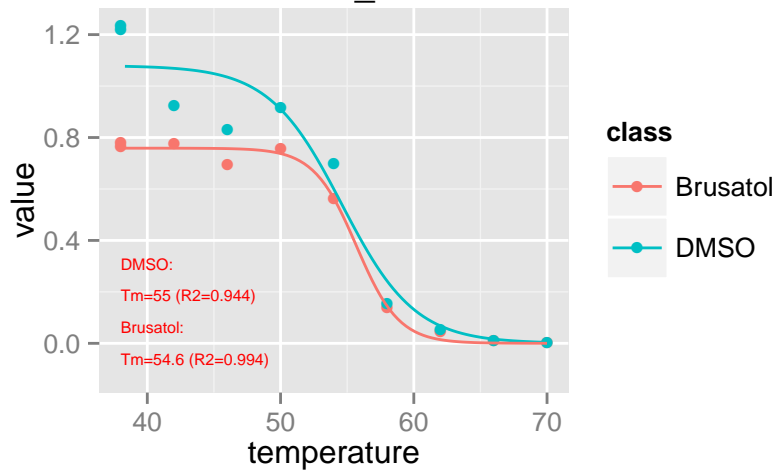

Prot: TCPZ\_HUMAN

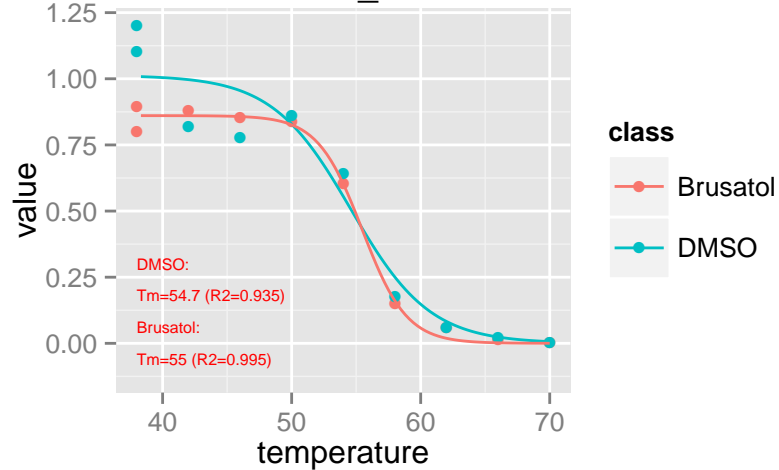

Prot: TCRG1\_HUMAN

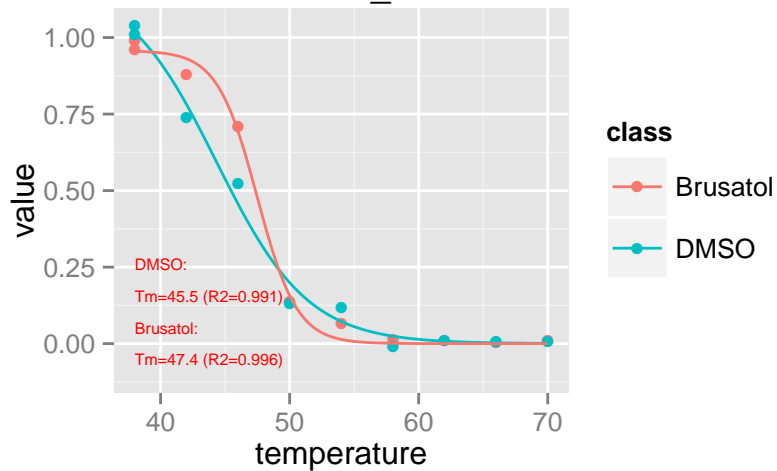

Prot: TCTP\_HUMAN

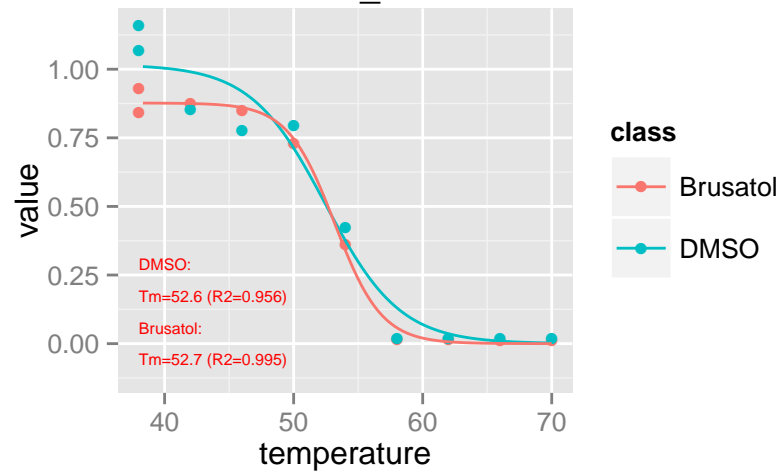

Prot: TEBP\_HUMAN

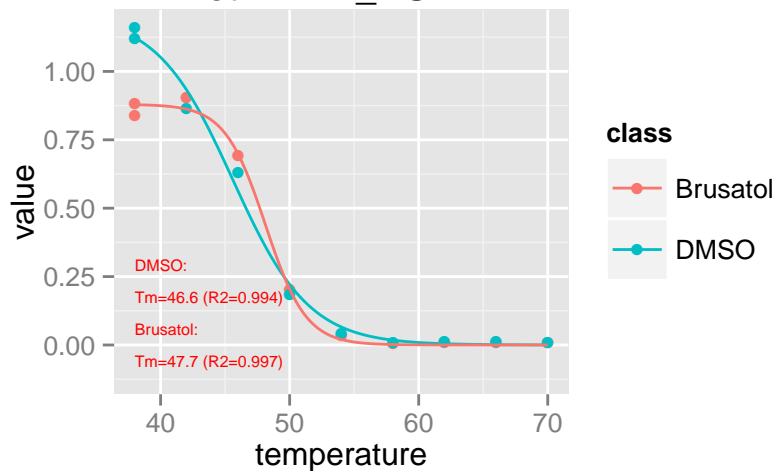

Prot: TELO2\_HUMAN

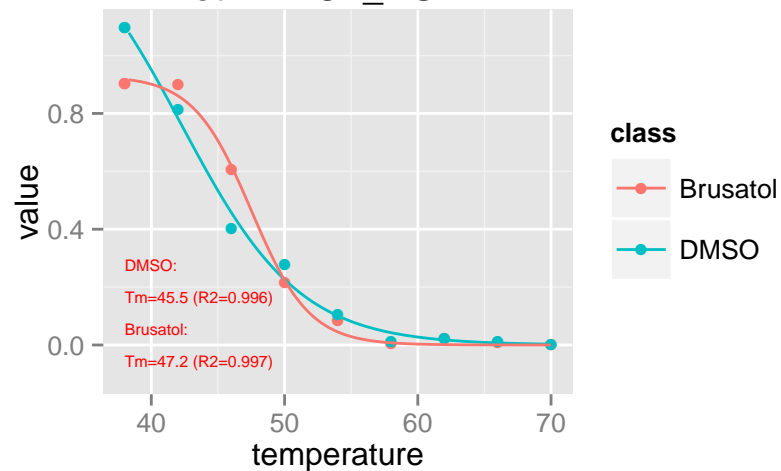

Prot: TENC1\_HUMAN

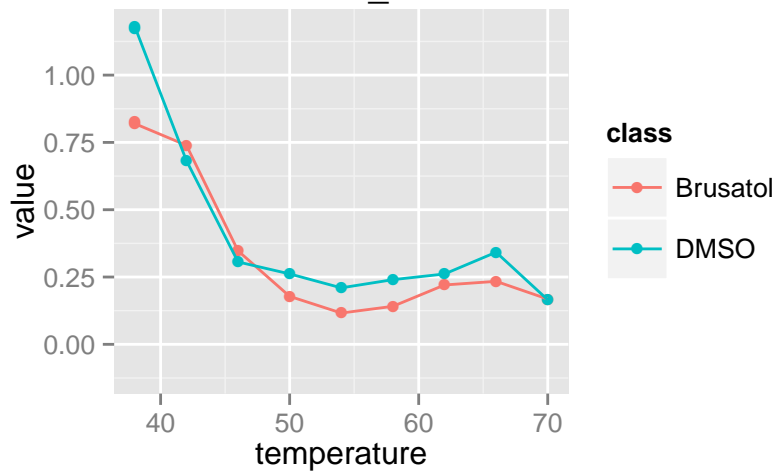

Prot: TENS3\_HUMAN

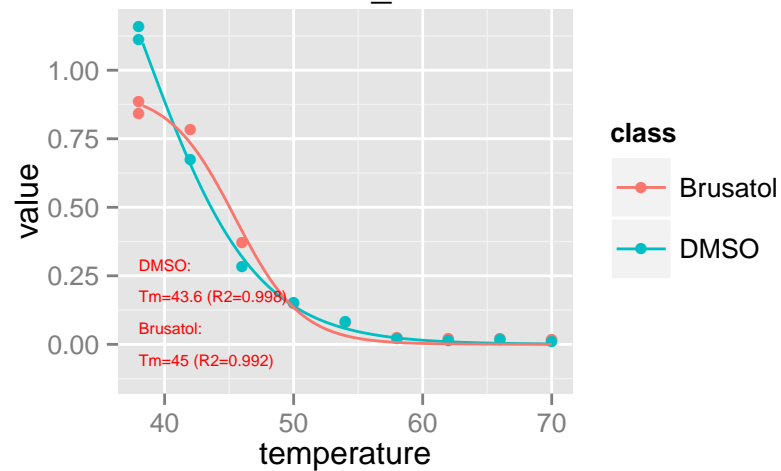

Prot: TERA\_HUMAN

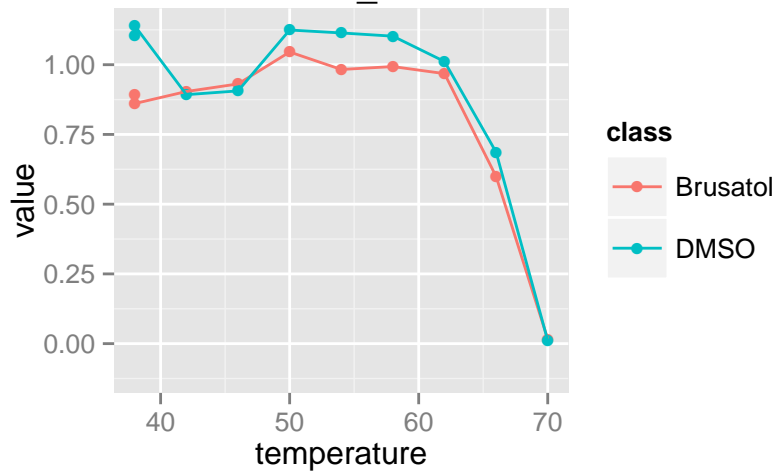

Prot: TES\_HUMAN

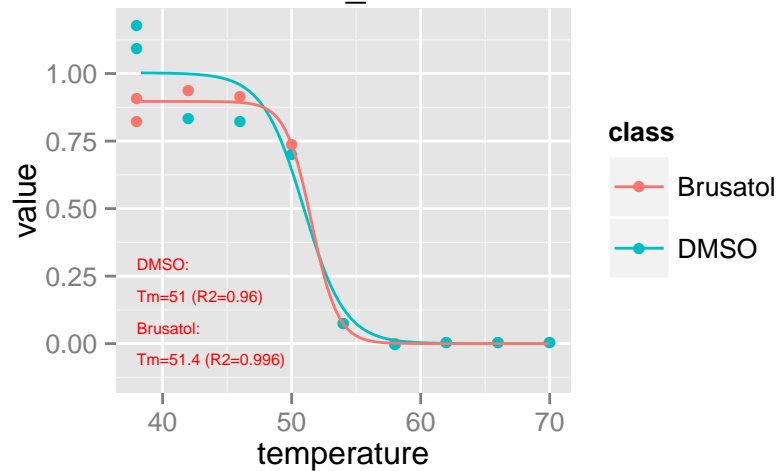

Prot: TESC\_HUMAN

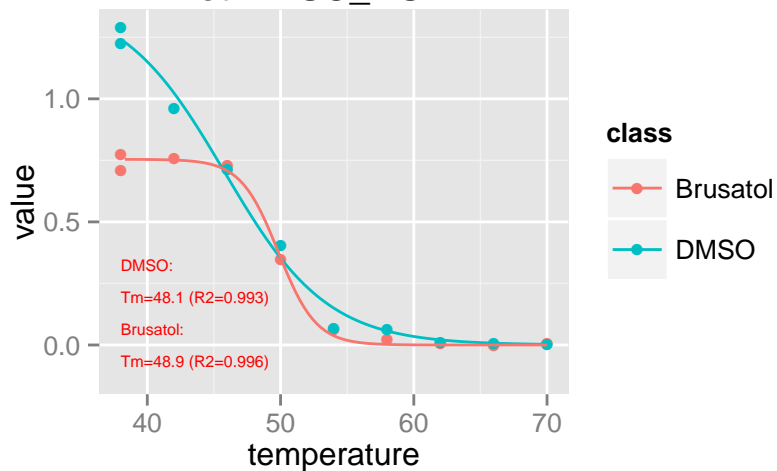

Prot: TF2AA\_HUMAN

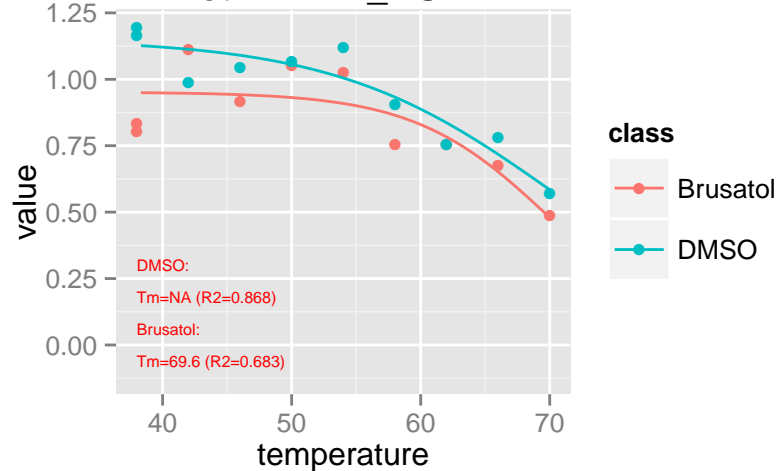

Prot: TF3C1\_HUMAN

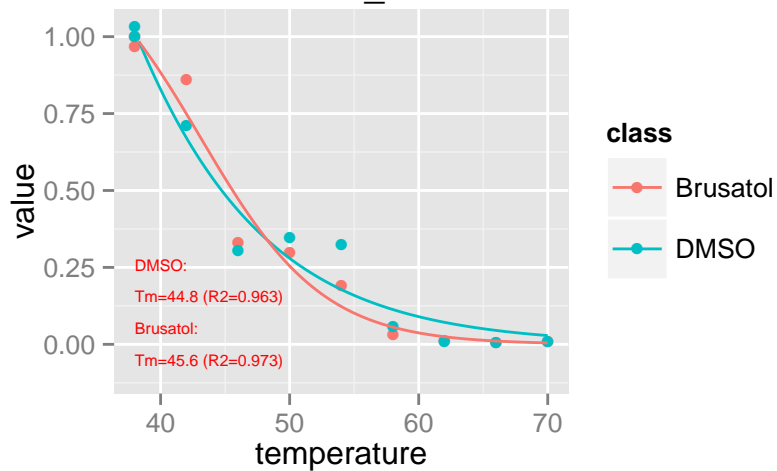

Prot: TF3C2\_HUMAN

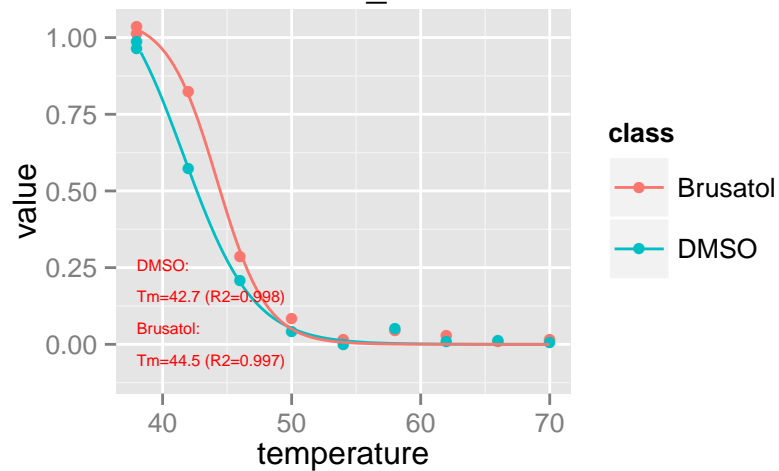

Prot: TF3C3\_HUMAN

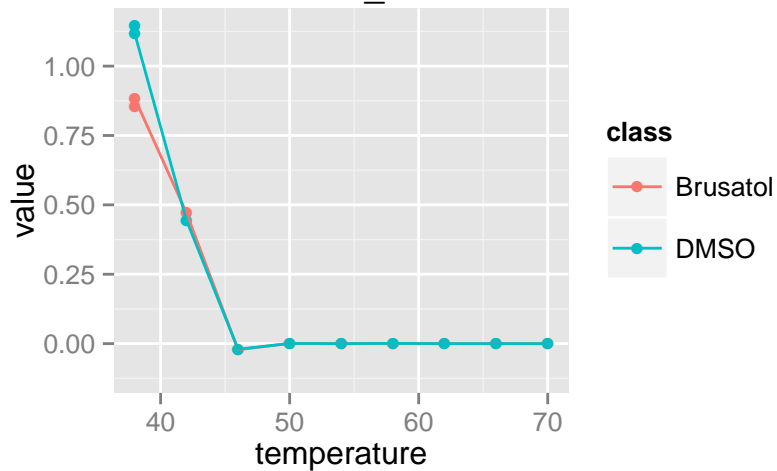

Prot: TF3C4\_HUMAN

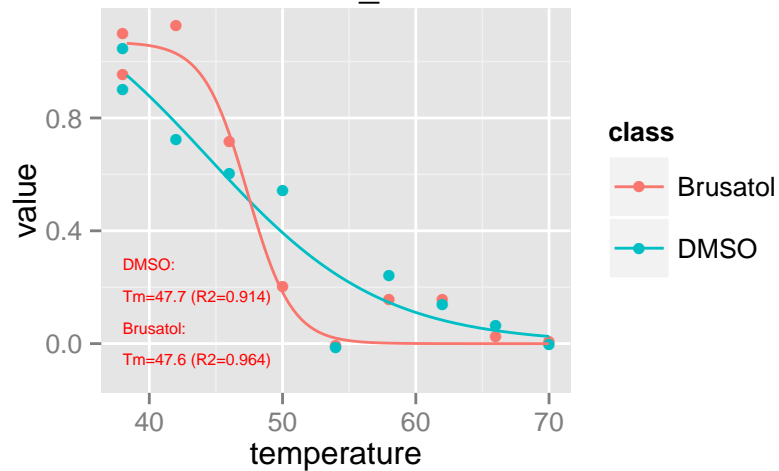

Prot: TF65\_HUMAN

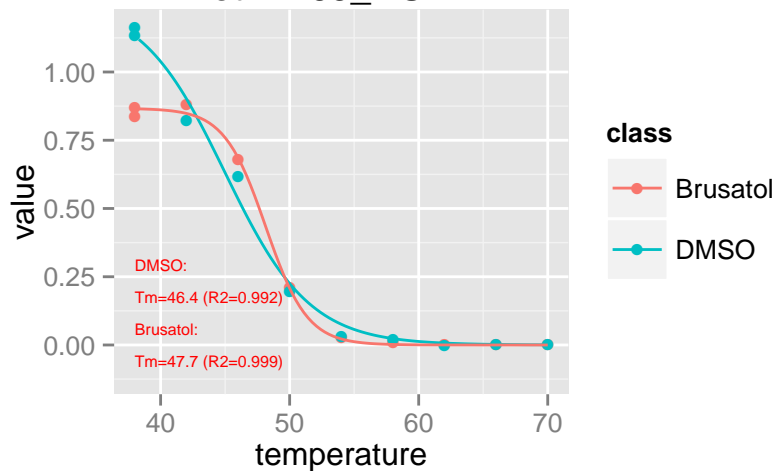

Prot: TFAM\_HUMAN

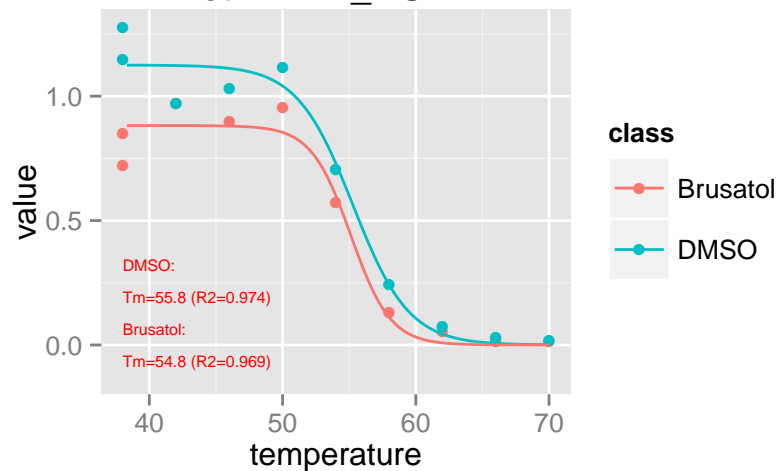

Prot: TFB2M\_HUMAN

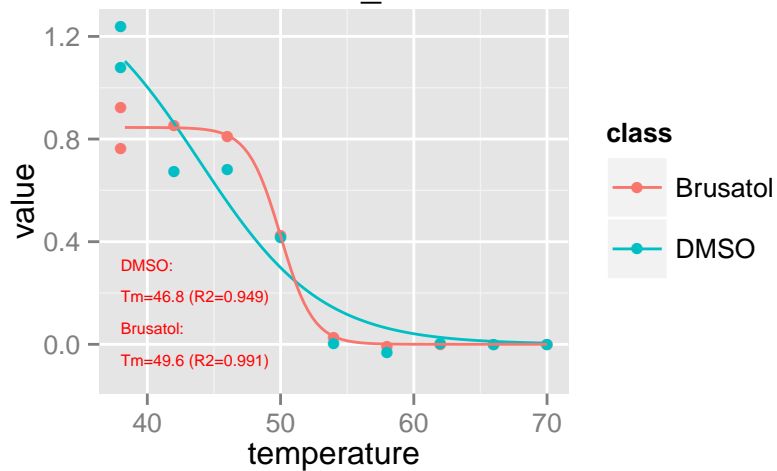

Prot: TF3P2\_HUMAN

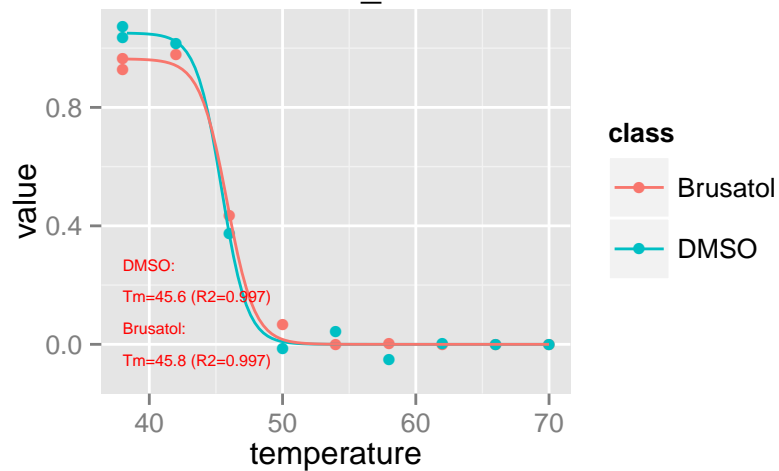



Prot: TFG\_HUMAN

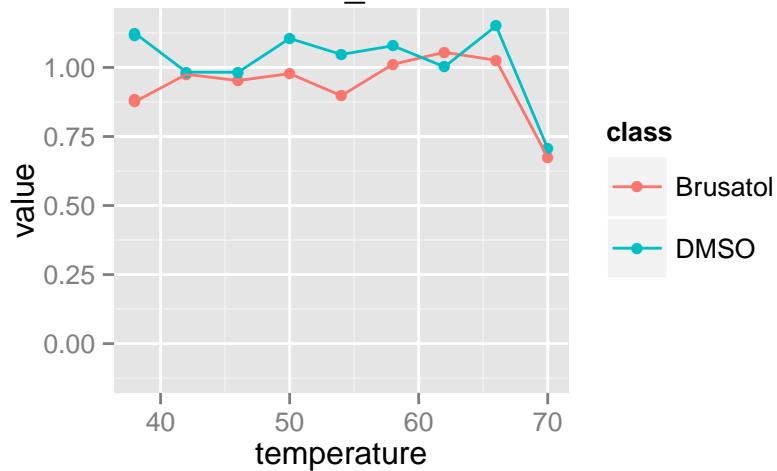

Prot: TFIP8\_HUMAN

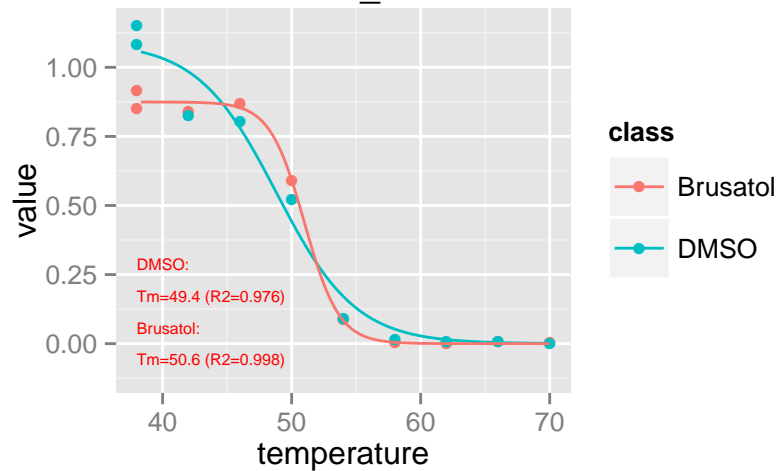

Prot: TFR1\_HUMAN

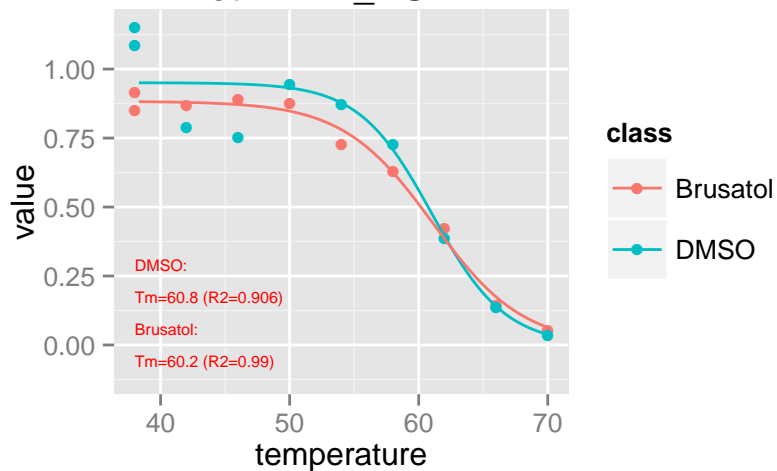

Prot: TGF11\_HUMAN

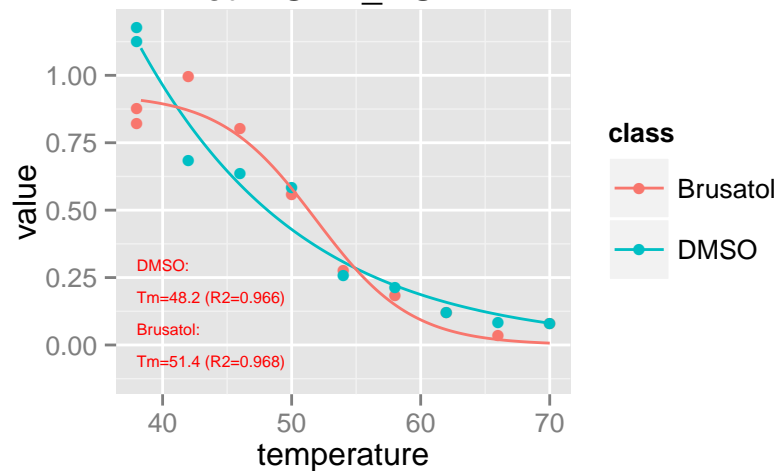

Prot: TGM2\_HUMAN

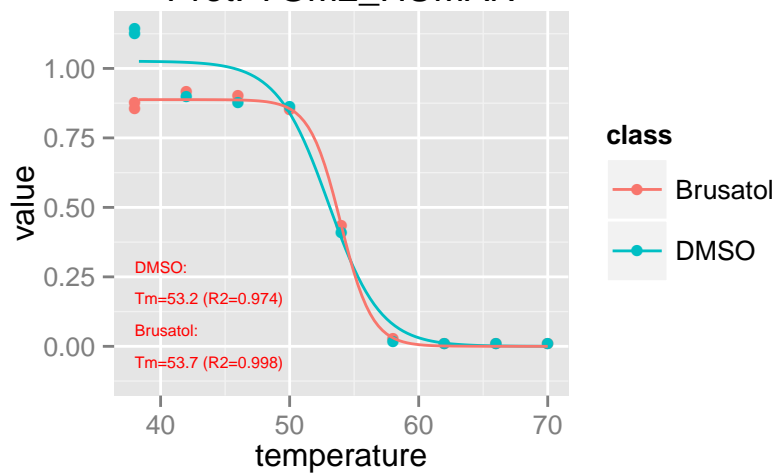

Prot: TGON2\_HUMAN

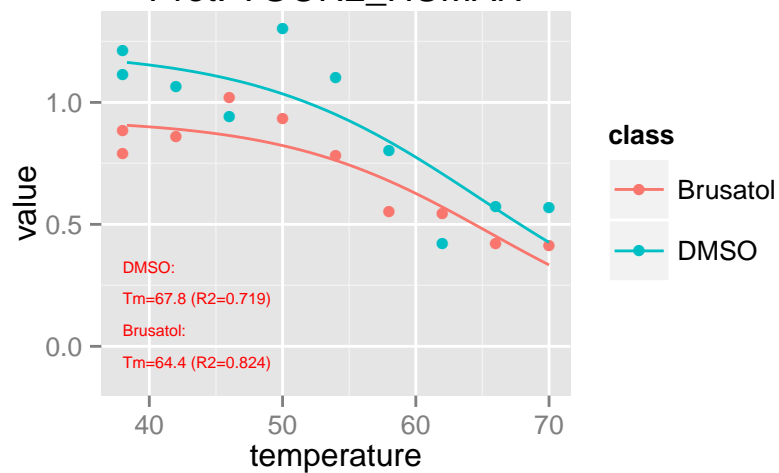

Prot: TGT\_HUMAN

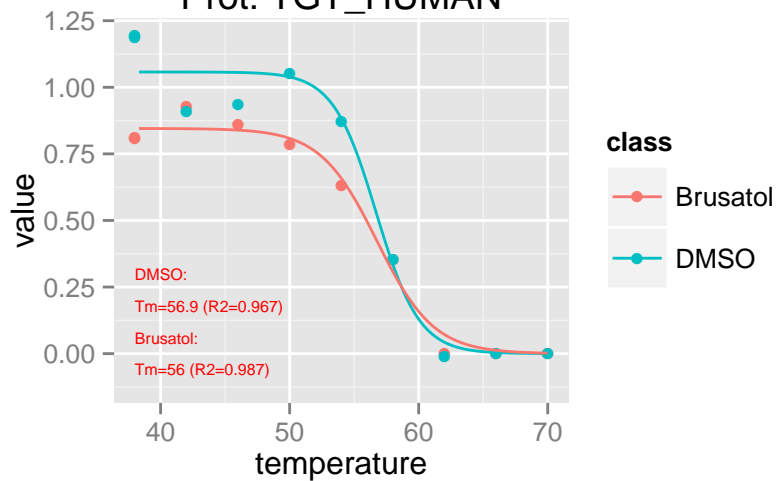

Prot: THADA\_HUMAN

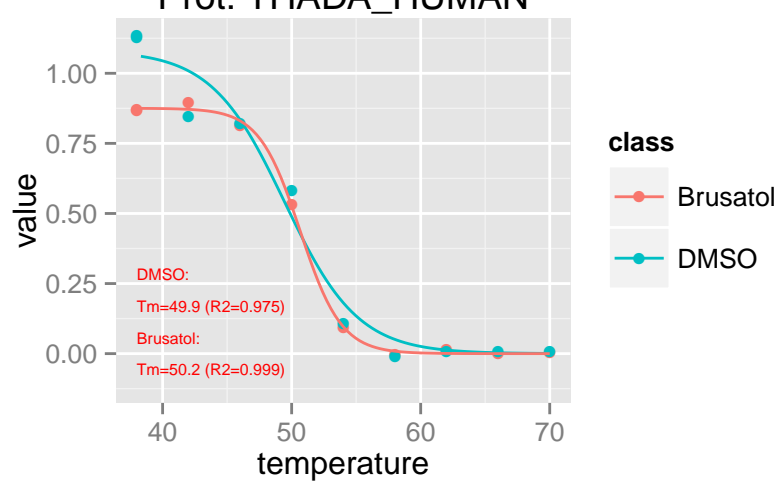

Prot: THEM4\_HUMAN

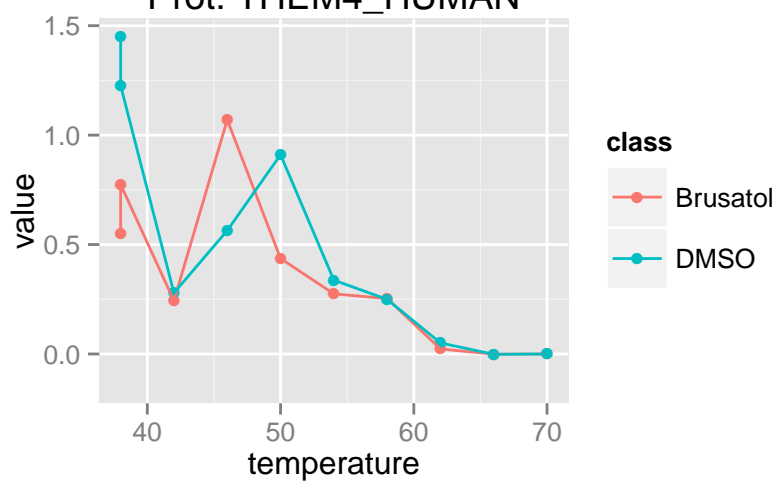

Prot: THG1\_HUMAN

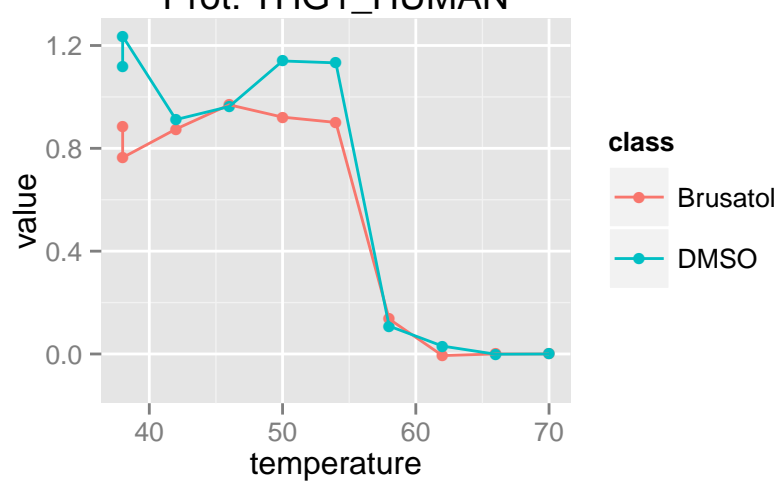

Prot: THIC\_HUMAN

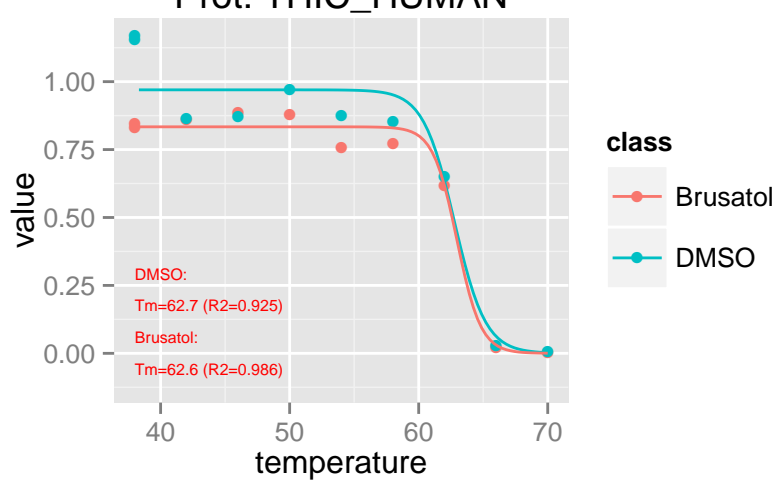

Prot: THIK\_HUMAN

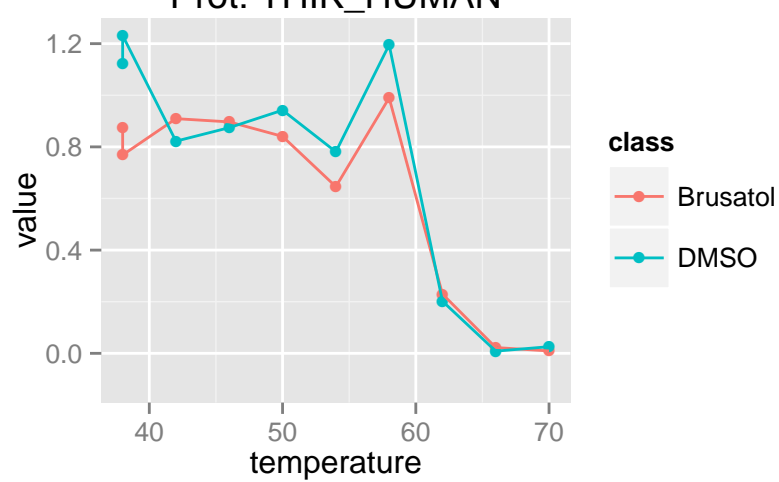

Prot: THIL\_HUMAN

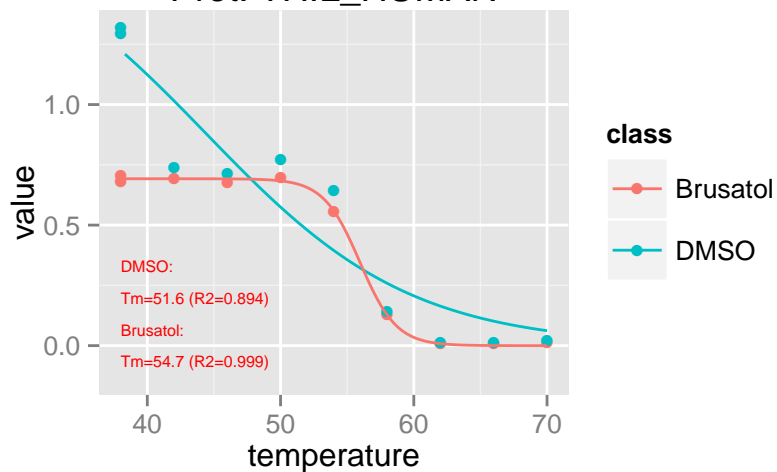

Prot: THIM\_HUMAN

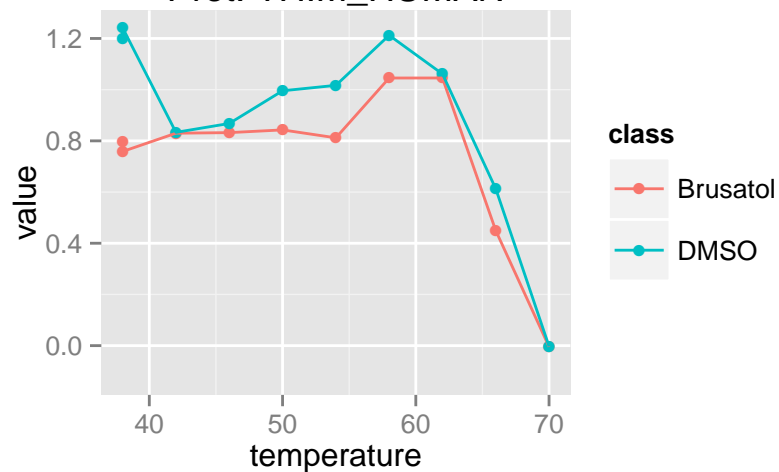

Prot: THIO\_HUMAN

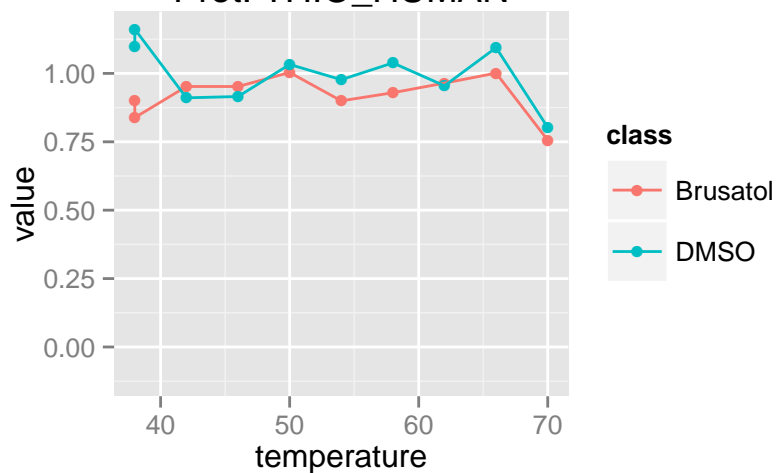

Prot: THOC2\_HUMAN

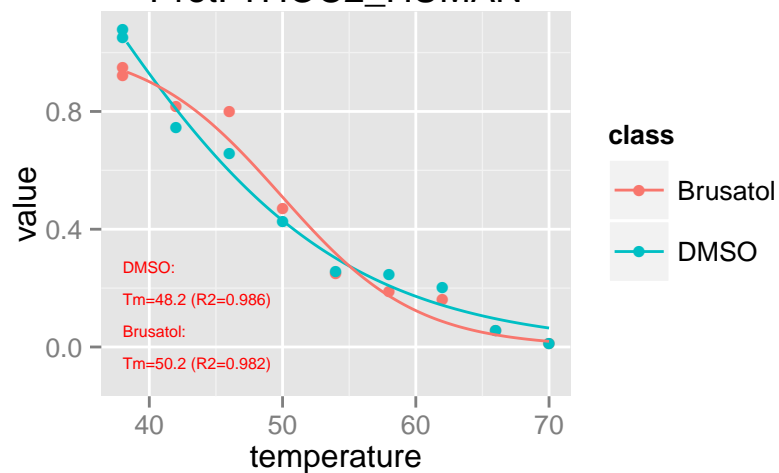

Prot: THOC3\_HUMAN

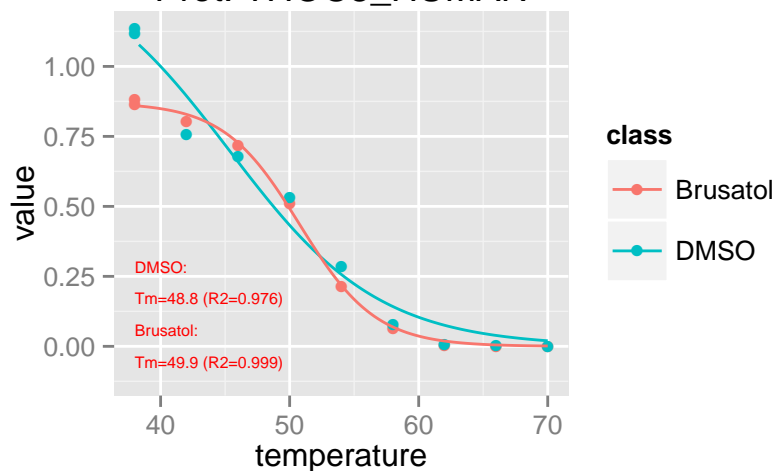

Prot: THOC4\_HUMAN

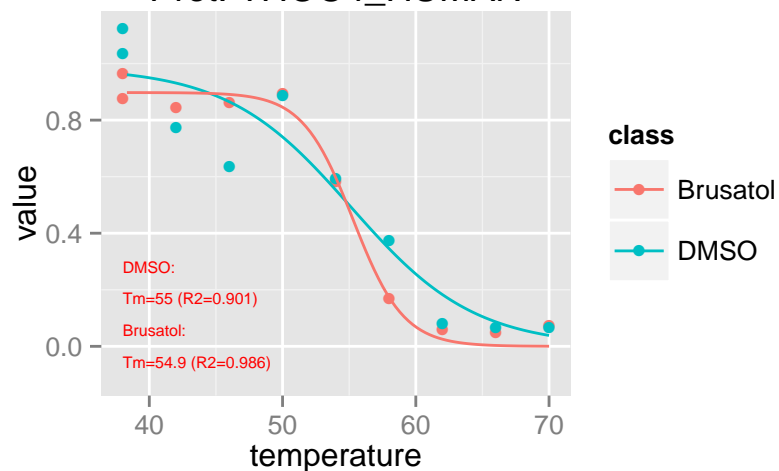

Prot: THOC5\_HUMAN

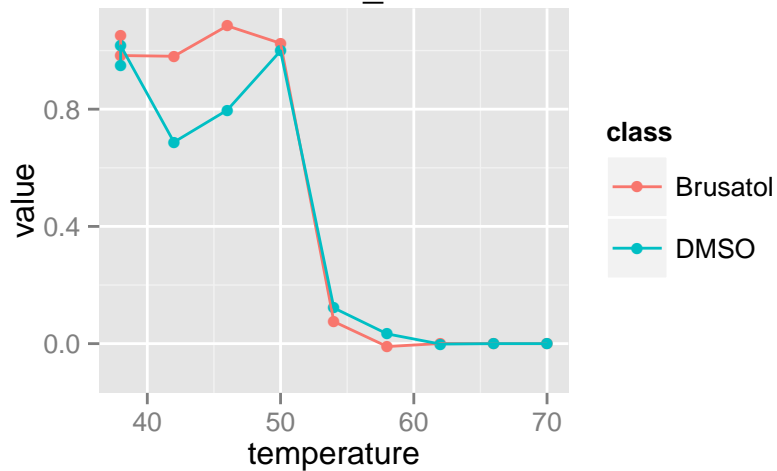

Prot: THOC6\_HUMAN

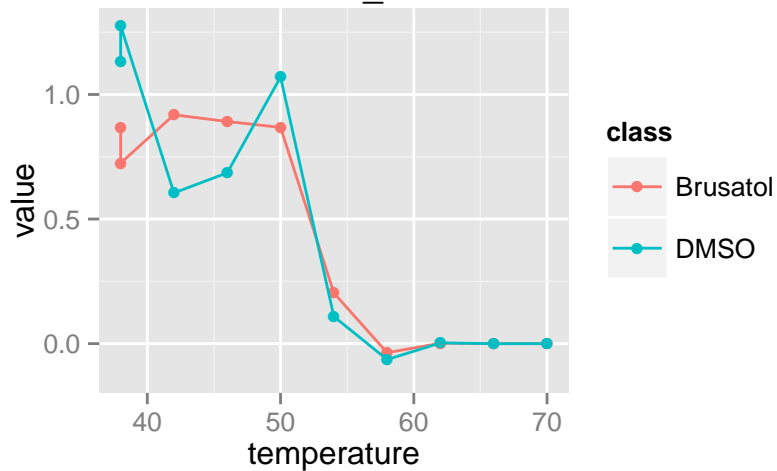

Prot: THOP1\_HUMAN

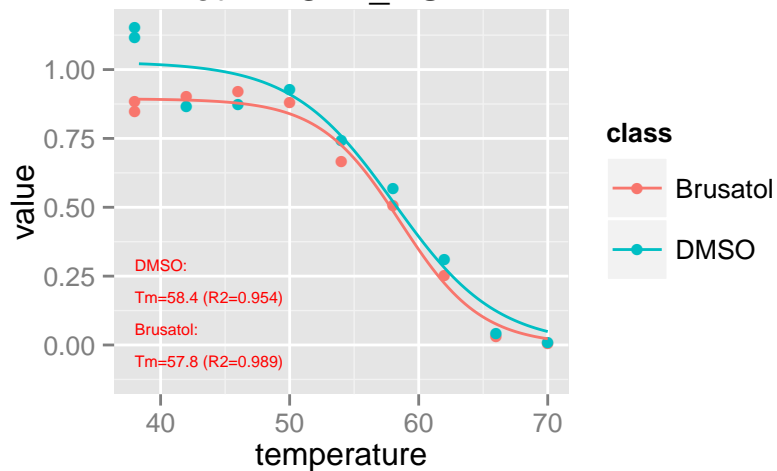

Prot: THTM\_HUMAN

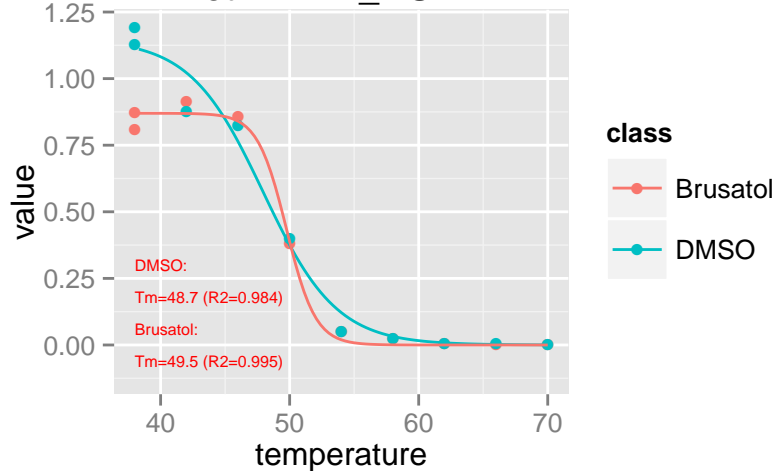

Prot: THTPA\_HUMAN

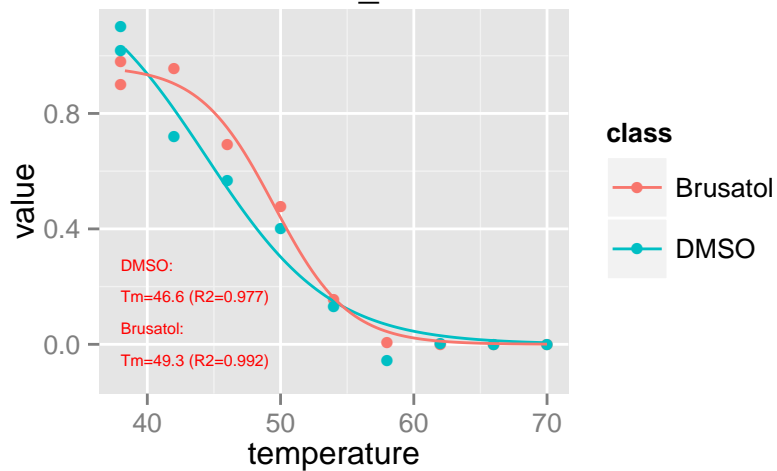

Prot: THTR\_HUMAN

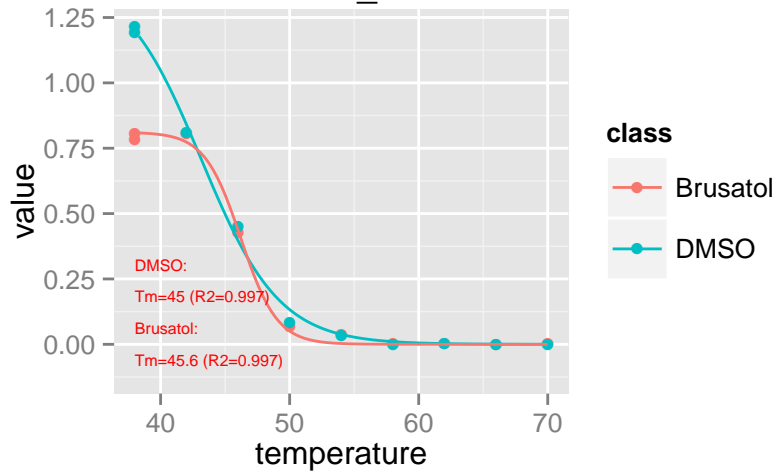

Prot: THUM1\_HUMAN

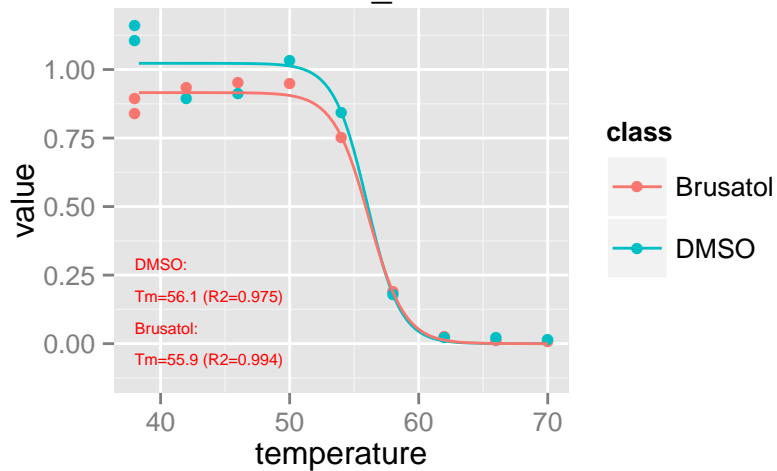

Prot: THUM3\_HUMAN

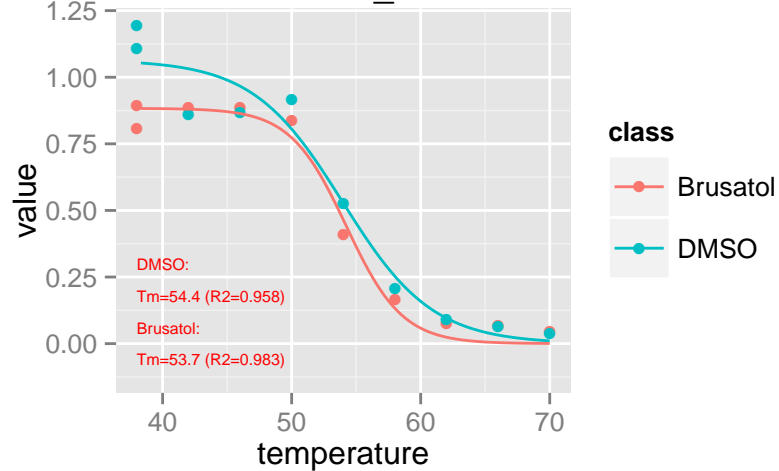

Prot: TIA1\_HUMAN

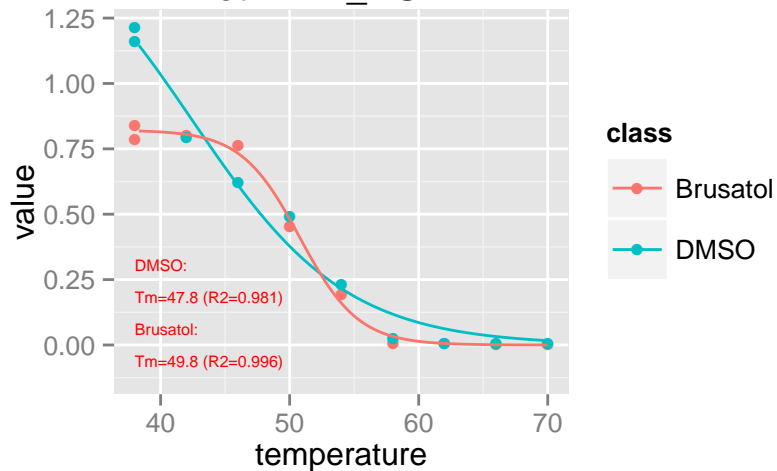

Prot: TIF1B\_HUMAN

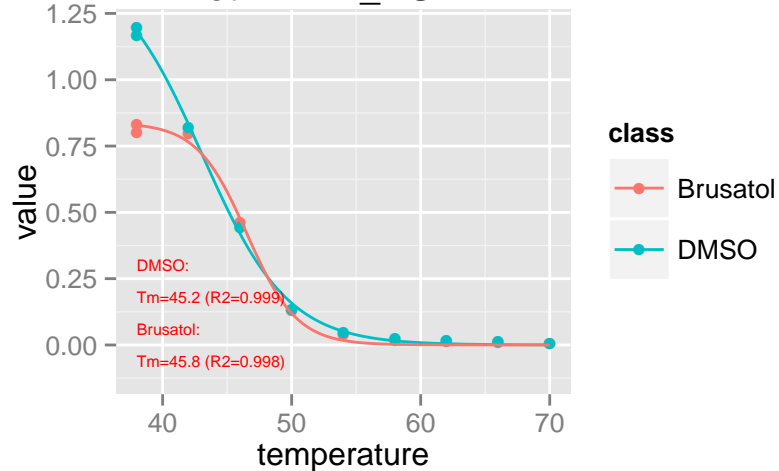

Prot: TIGAR\_HUMAN

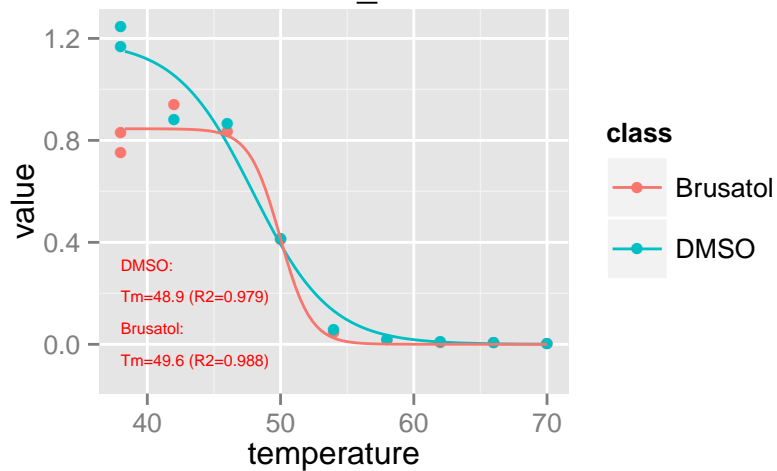

Prot: TIM\_HUMAN

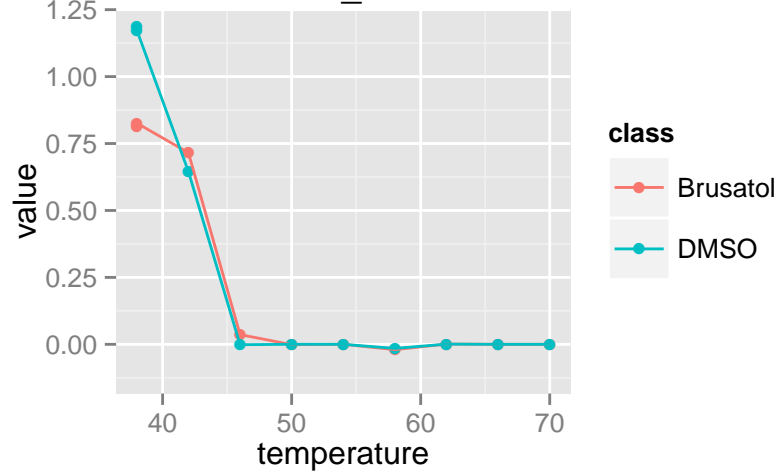

Prot: TIM10\_HUMAN

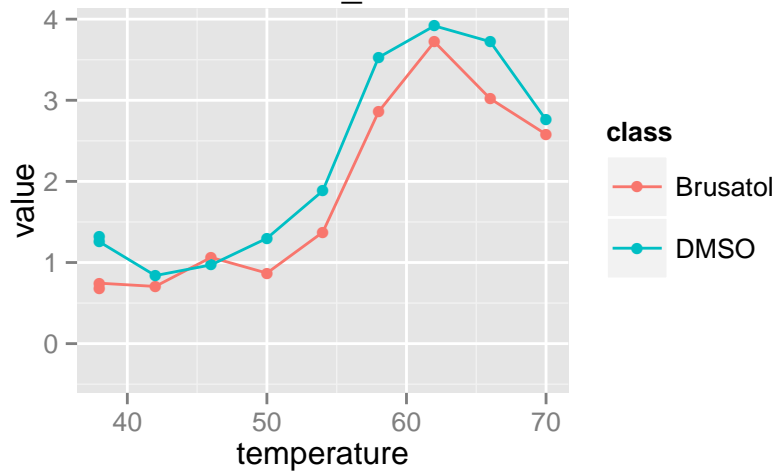

Prot: TIM13\_HUMAN

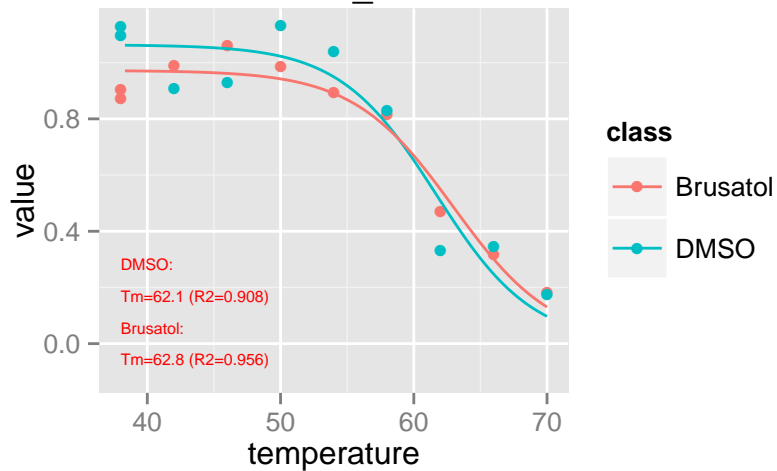

Prot: TIM44\_HUMAN

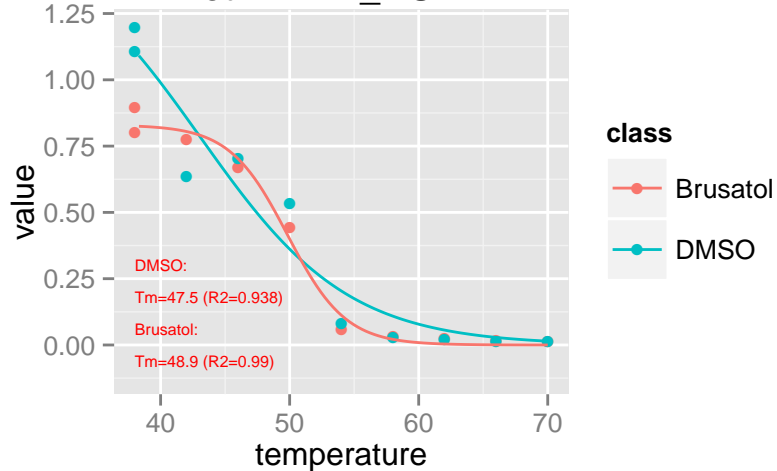

Prot: TIM8A\_HUMAN

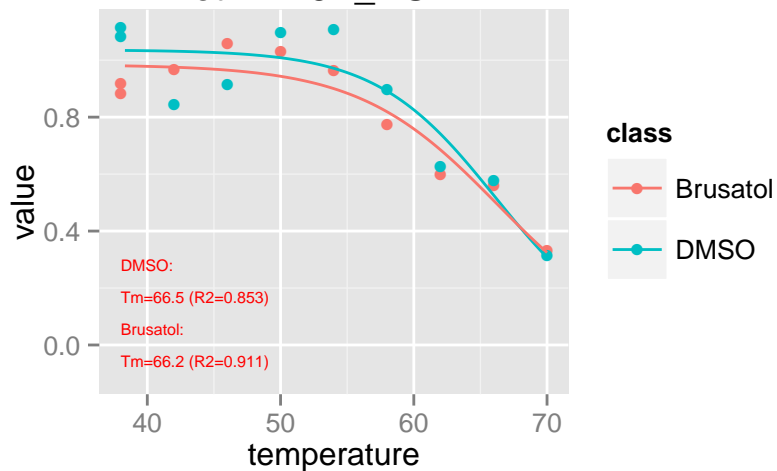

Prot: TIM8B\_HUMAN

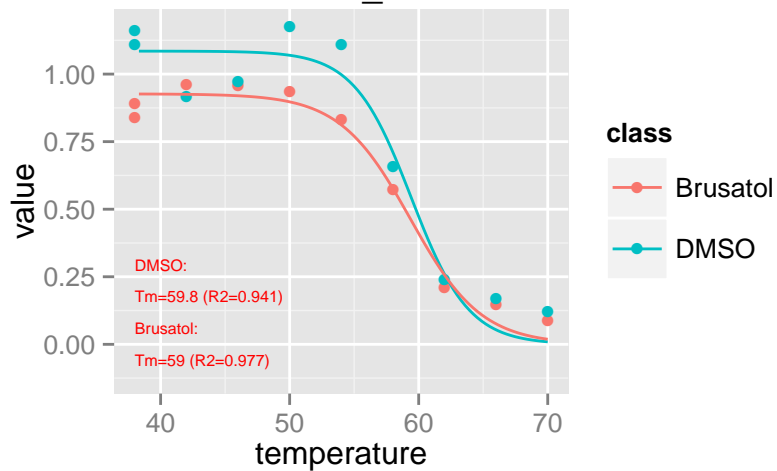

Prot: TIM9\_HUMAN

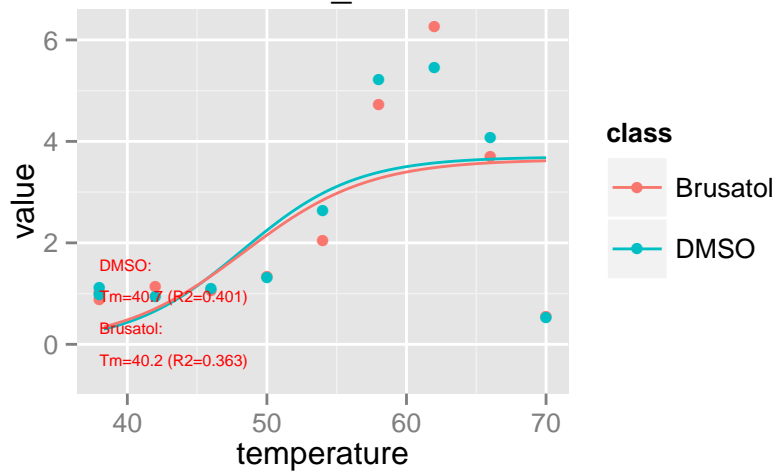

Prot: TIPIN\_HUMAN

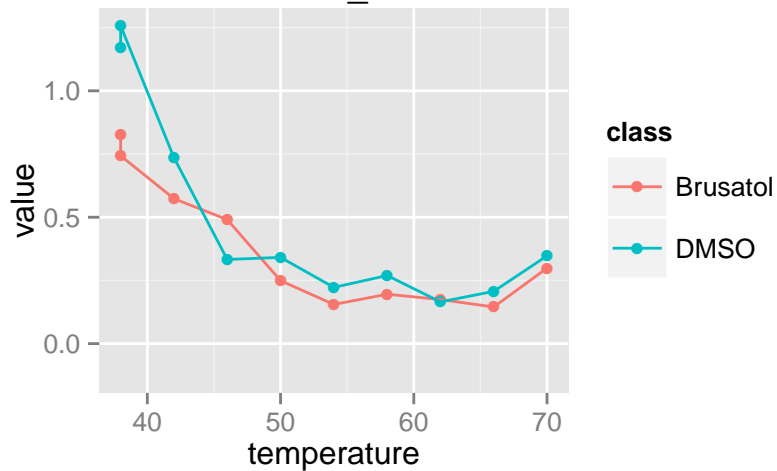

Prot: TIPRL\_HUMAN

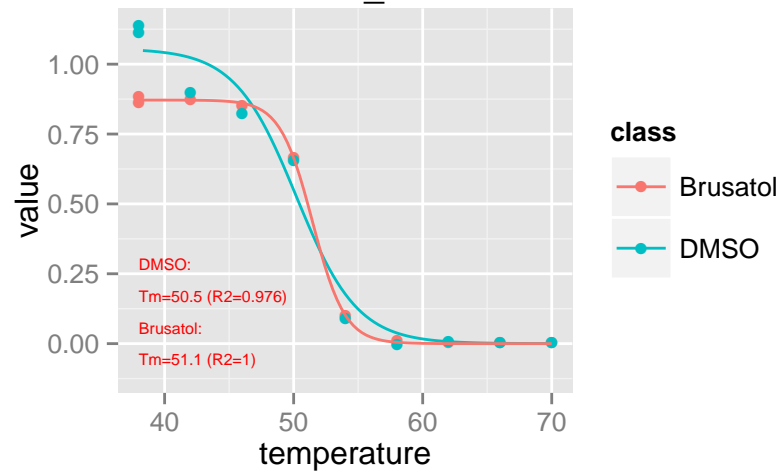

Prot: TITIN\_HUMAN

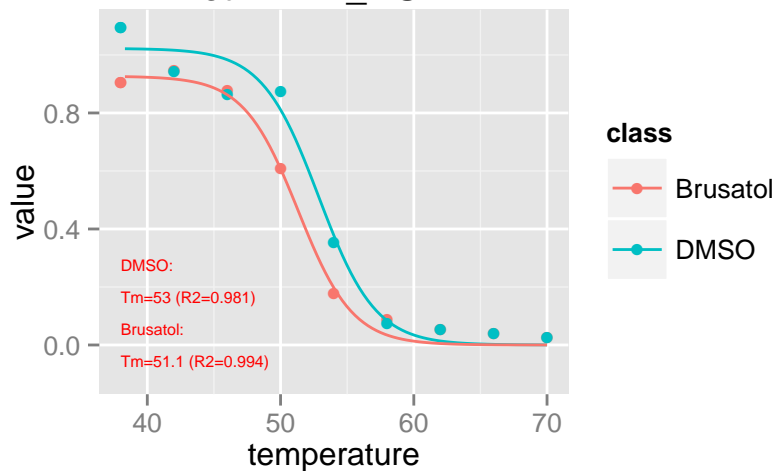

Prot: TJAP1\_HUMAN

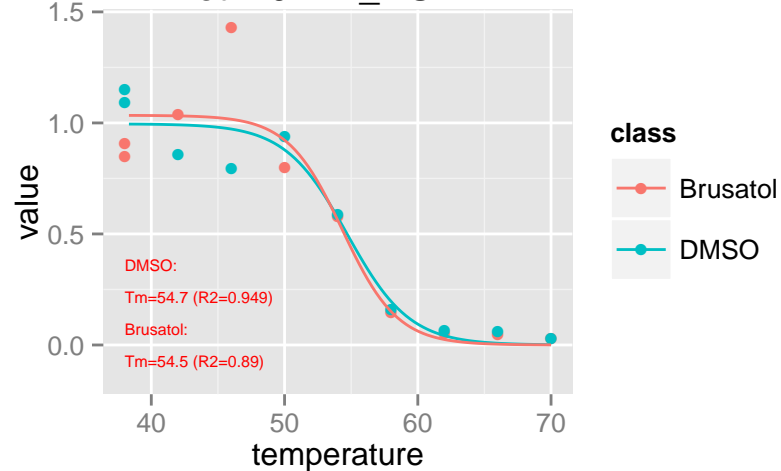

Prot: TKT\_HUMAN

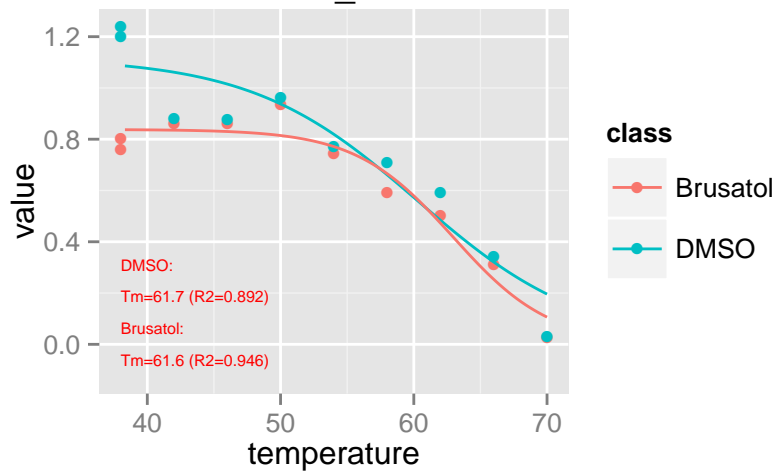

Prot: TLE1\_HUMAN

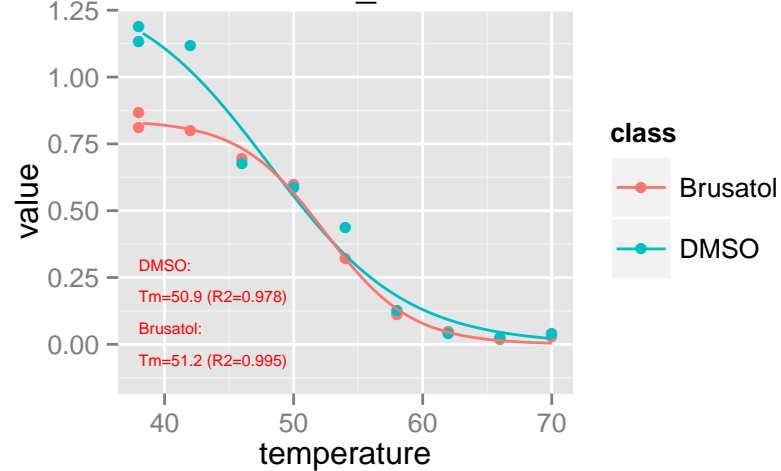

Prot: TLE3\_HUMAN

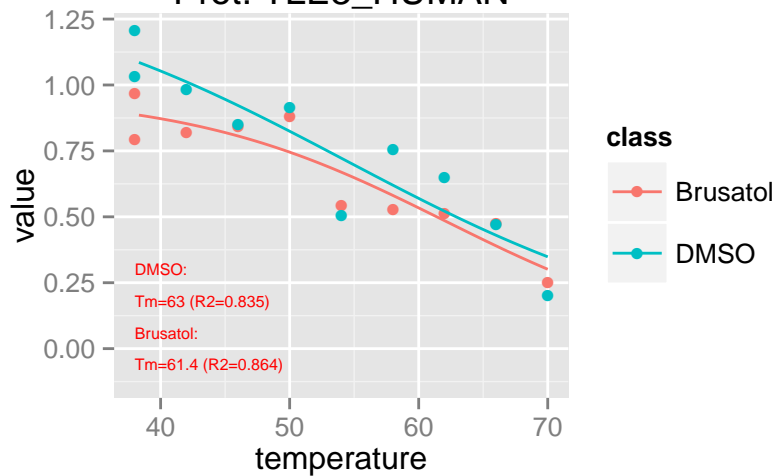

Prot: TLK1\_HUMAN

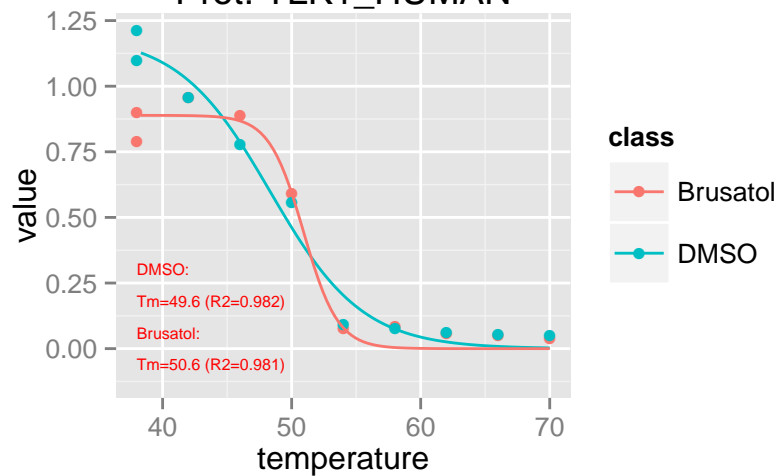

Prot: TLN1\_HUMAN

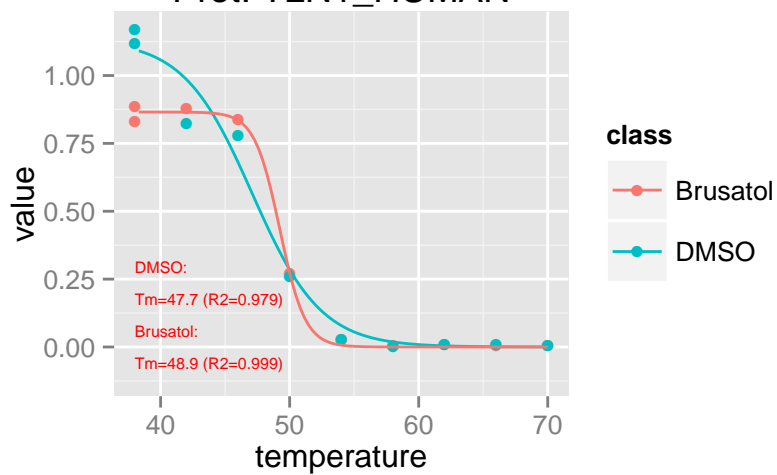

Prot: TLN2\_HUMAN

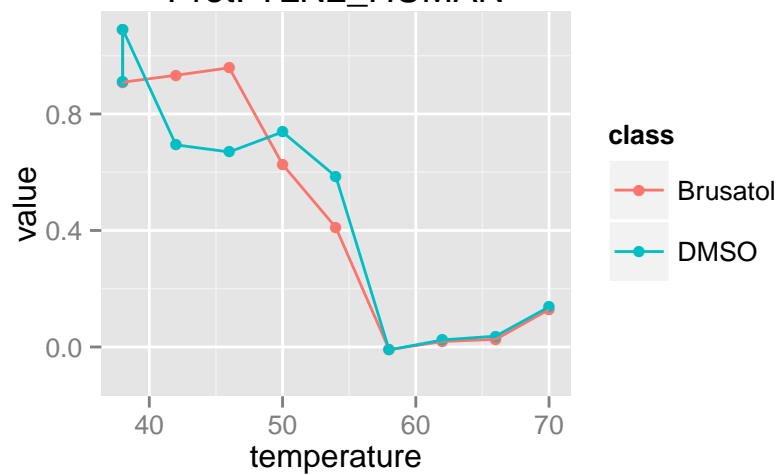

Prot: TM1L1\_HUMAN

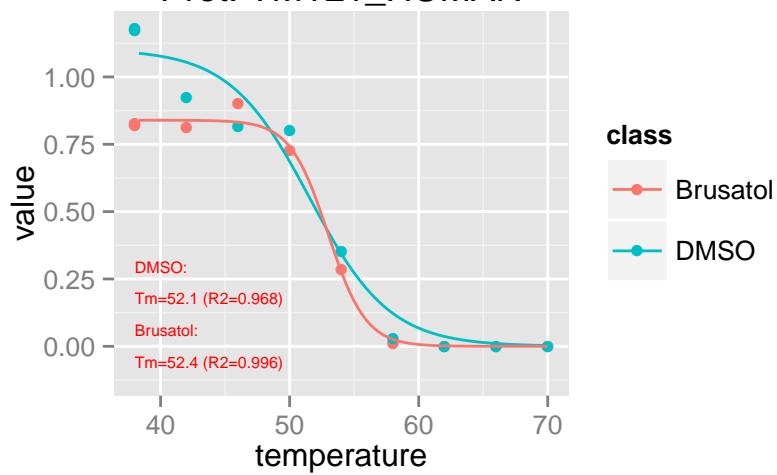

Prot: TM1L2\_HUMAN

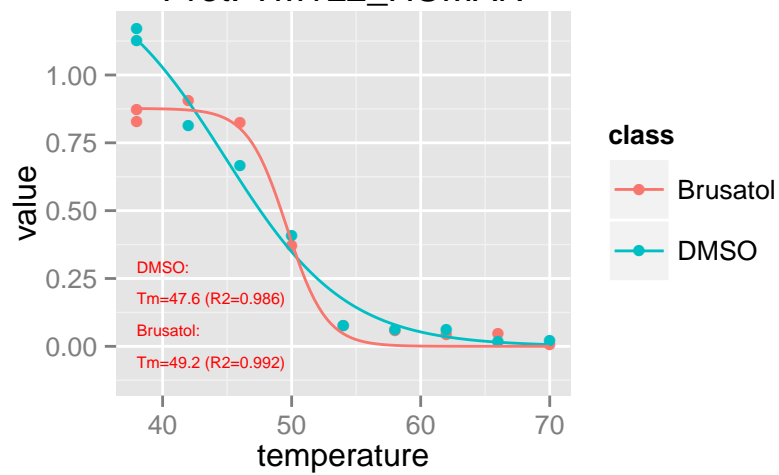



Prot: TMF1\_HUMAN

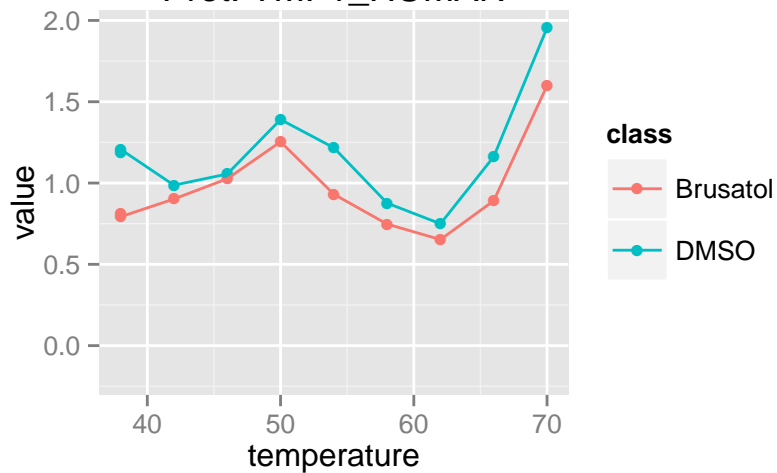

Prot: TMOD2\_HUMAN

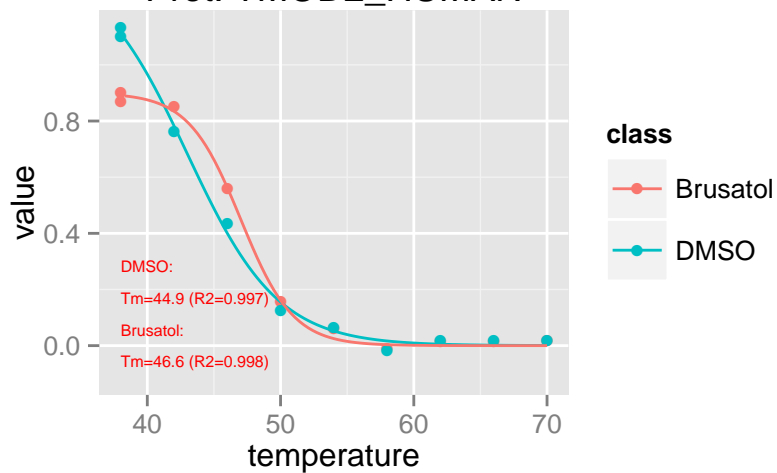

Prot: TMOD3\_HUMAN

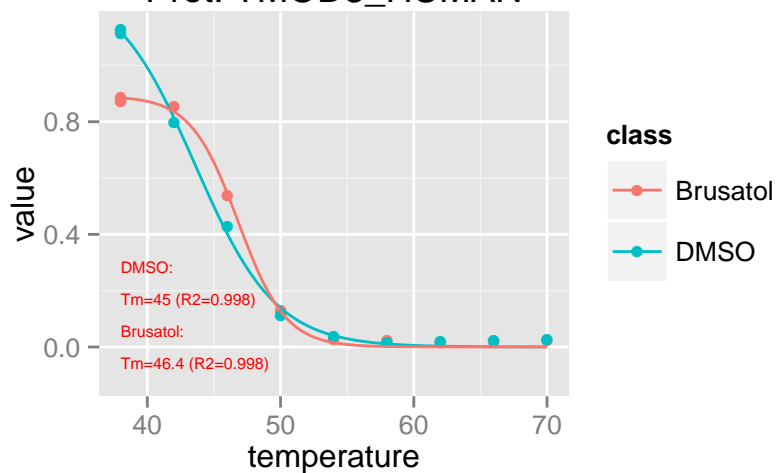

Prot: TMSL3\_HUMAN

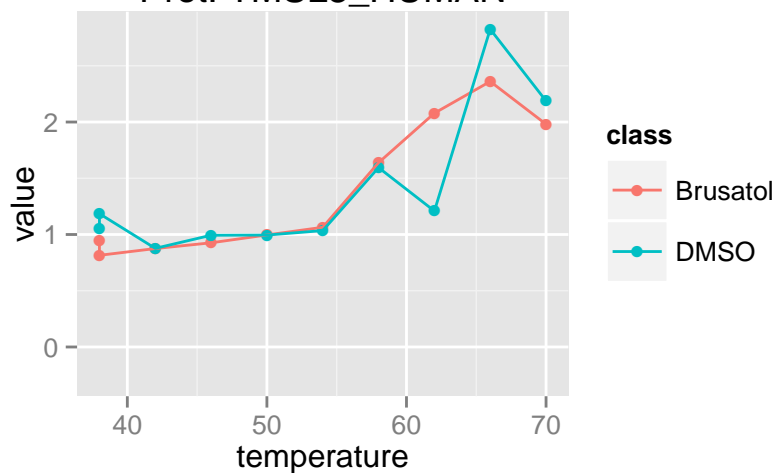

Prot: TNAP2\_HUMAN

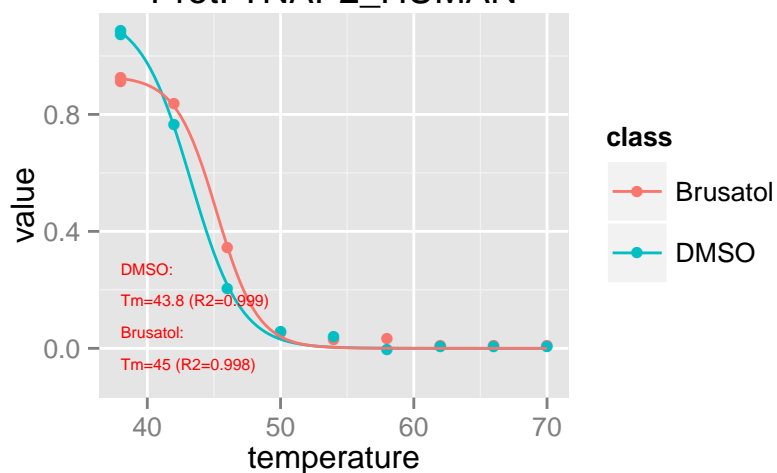

Prot: TNPO1\_HUMAN

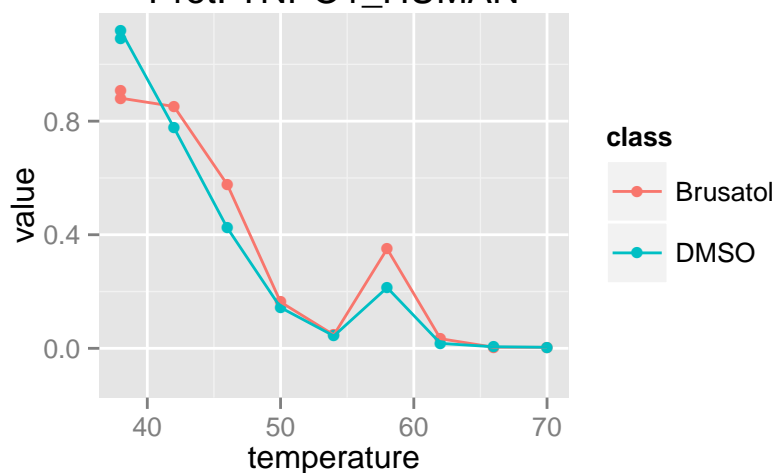

Prot: TNPO2\_HUMAN

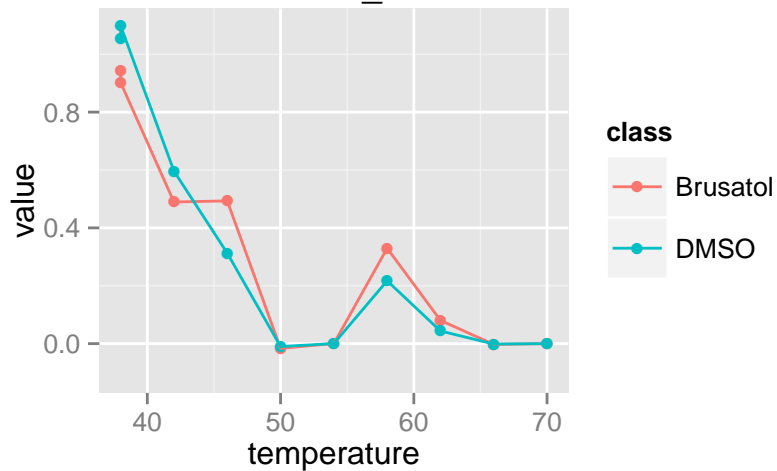

Prot: TNPO3\_HUMAN

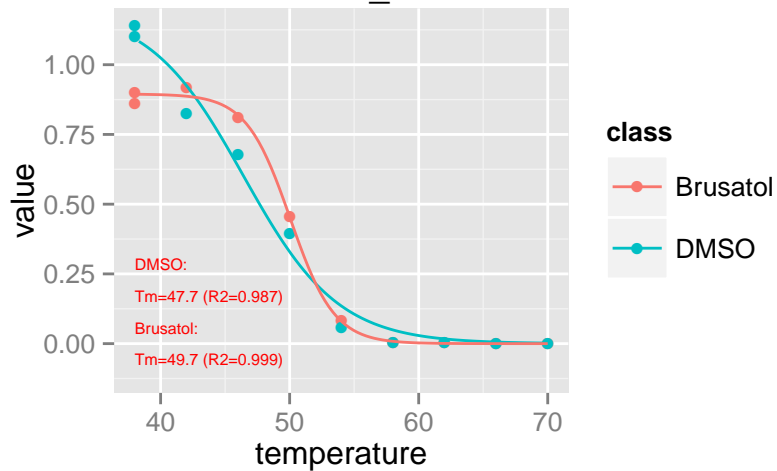

Prot: TNR6B\_HUMAN

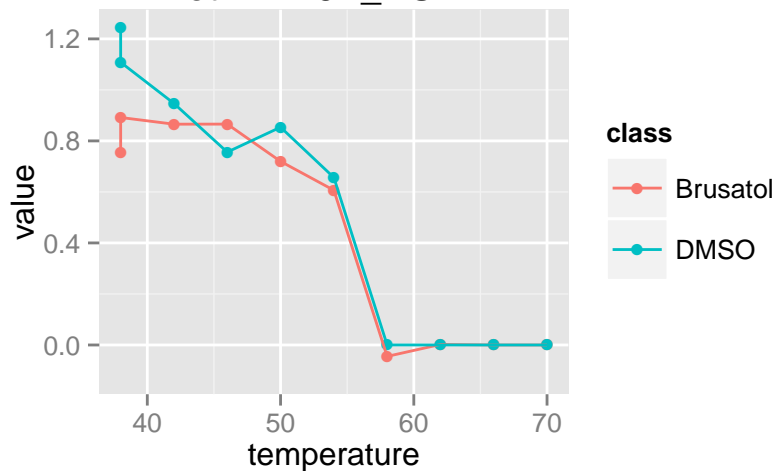

Prot: TOIP1\_HUMAN

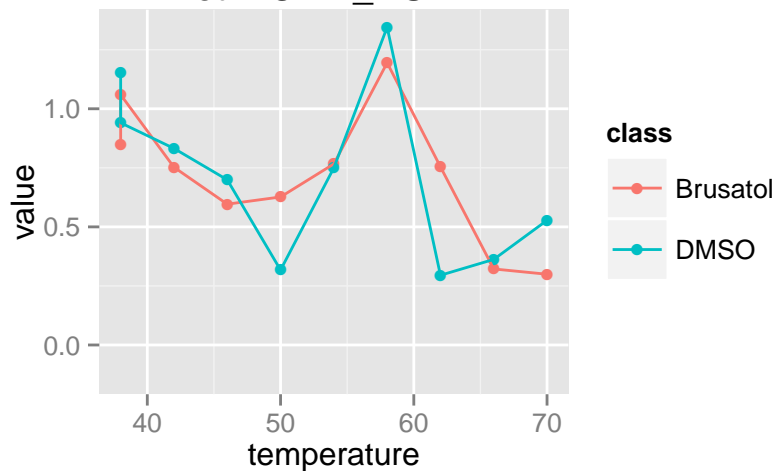

Prot: TOLIP\_HUMAN

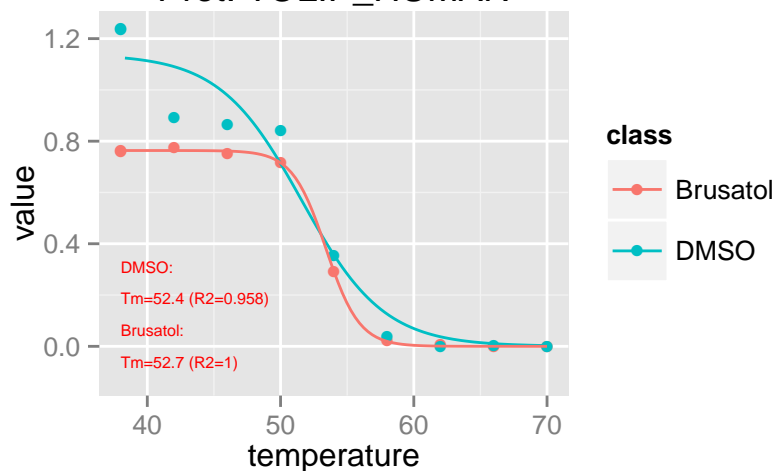

Prot: TOM34\_HUMAN

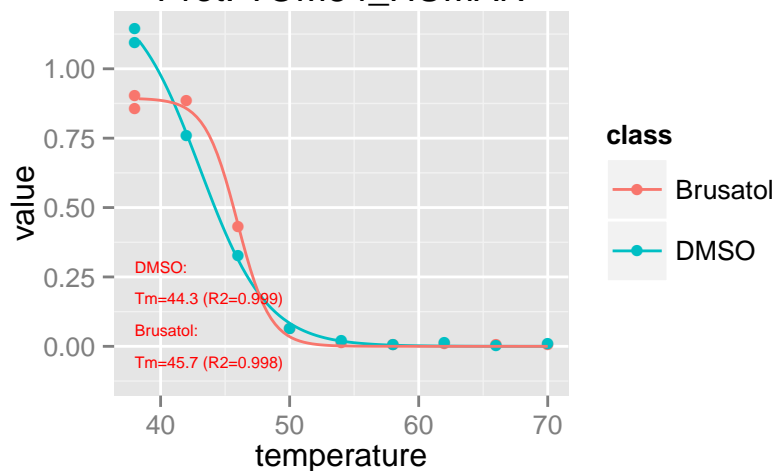

Prot: TOP2A\_HUMAN

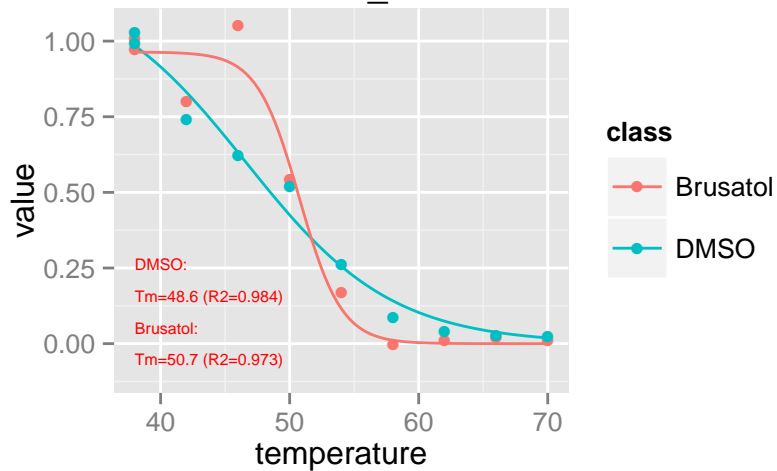

Prot: TOP2B\_HUMAN

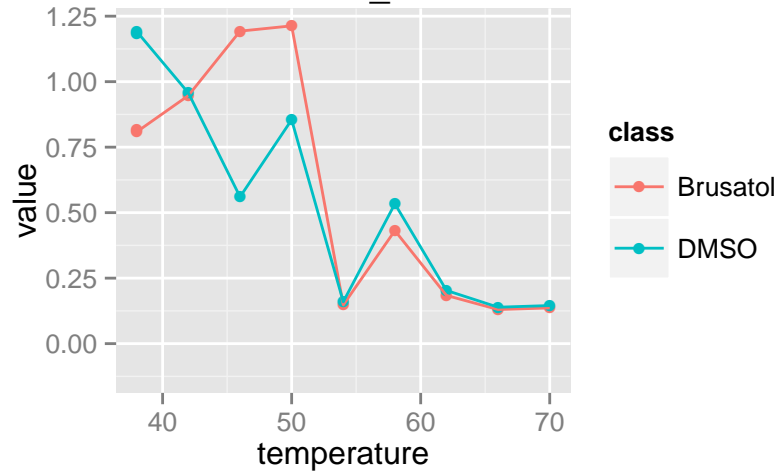

Prot: TOPK\_HUMAN

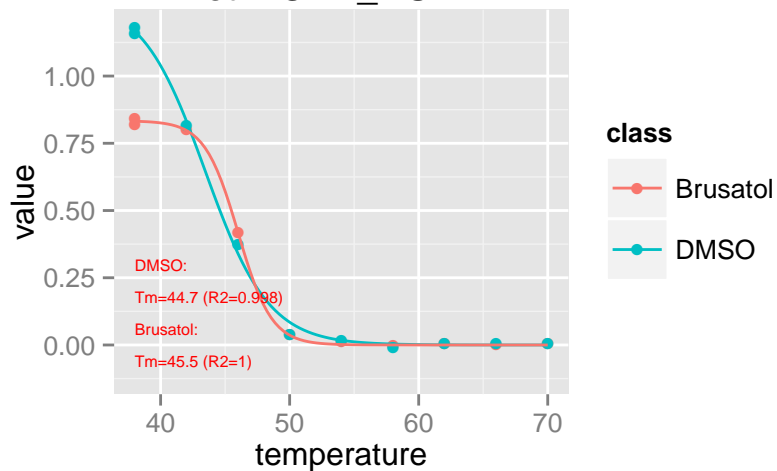

Prot: TOR1B\_HUMAN

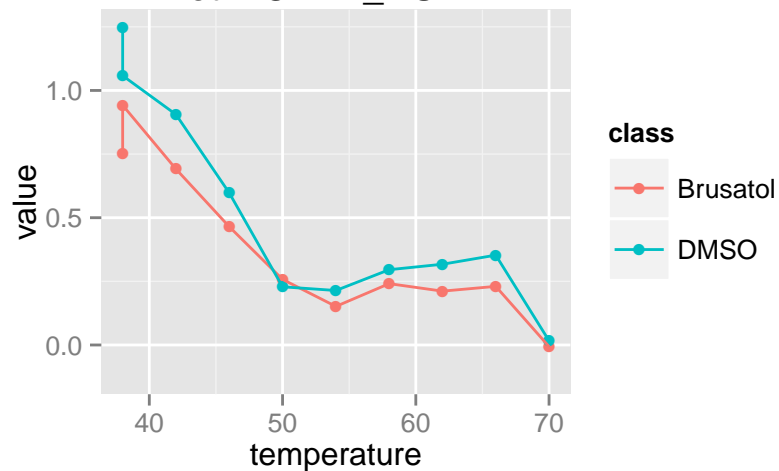

Prot: TP53B\_HUMAN

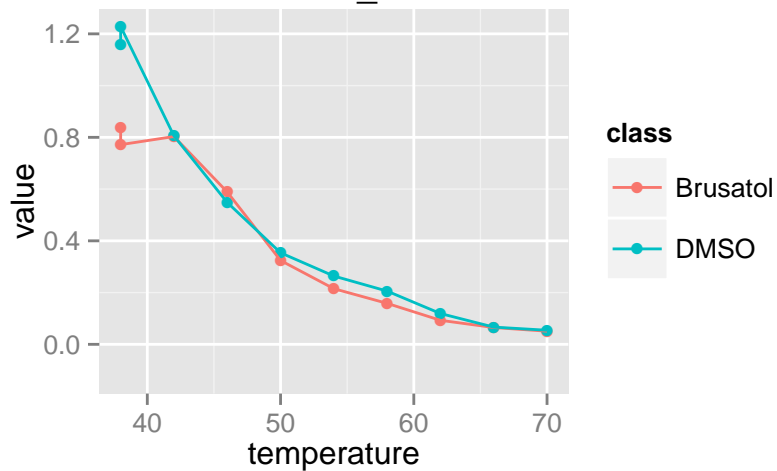

Prot: TPC12\_HUMAN

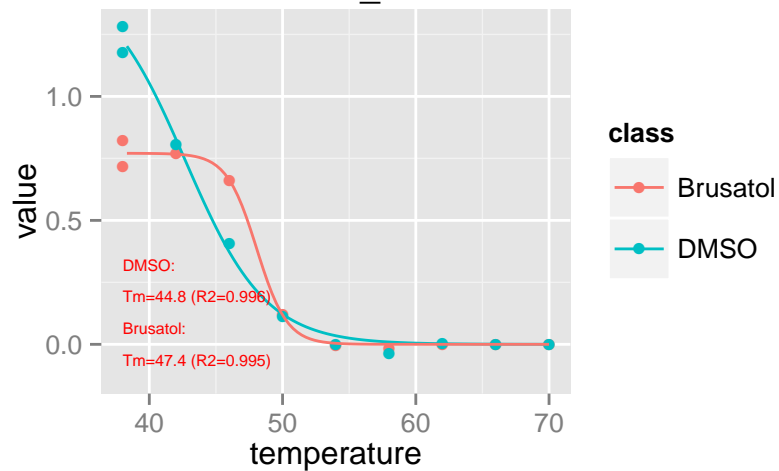

Prot: TPD52\_HUMAN

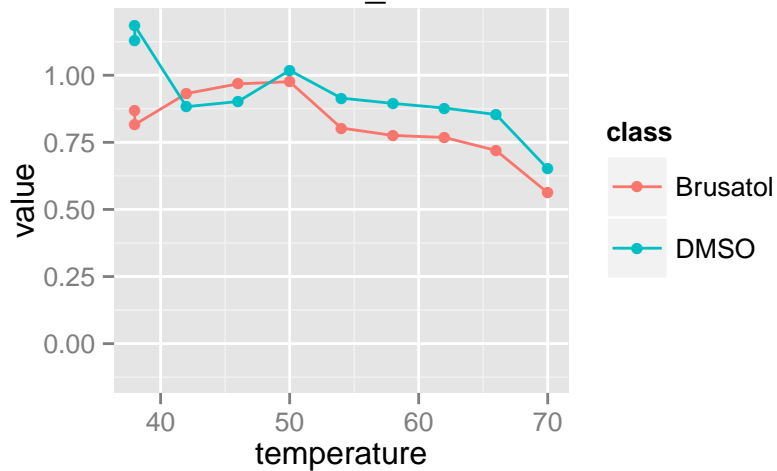

Prot: TPD53\_HUMAN

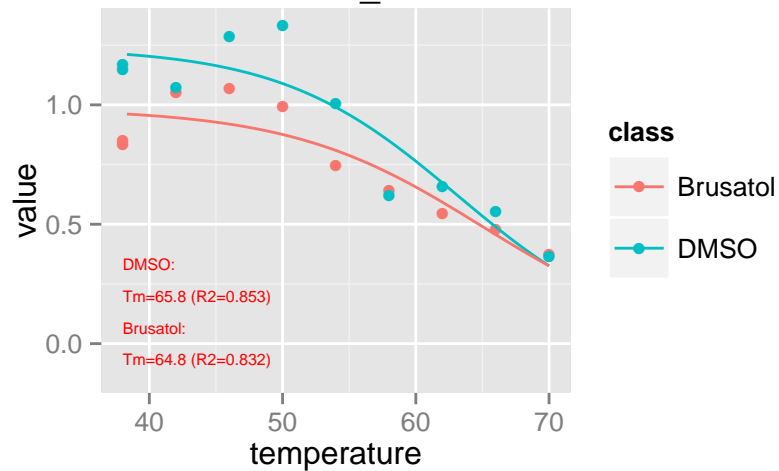

Prot: TPD54\_HUMAN

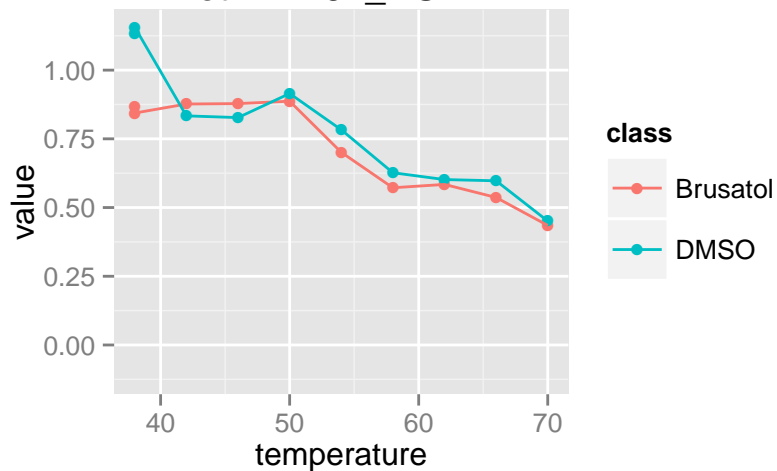

Prot: TPIS\_HUMAN

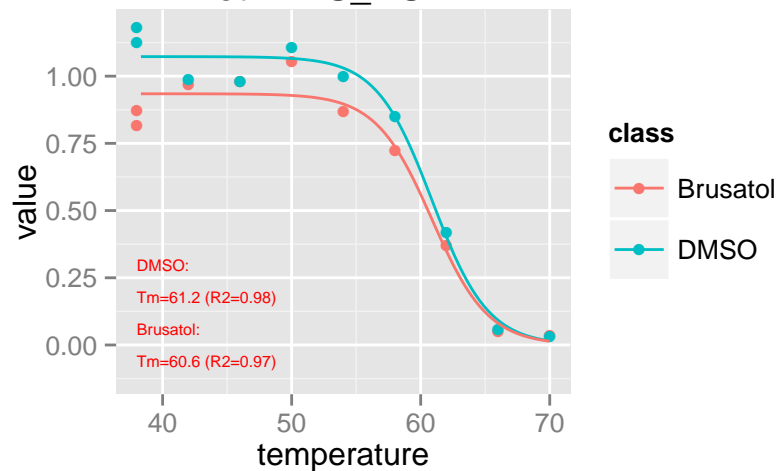

Prot: TPM1\_HUMAN

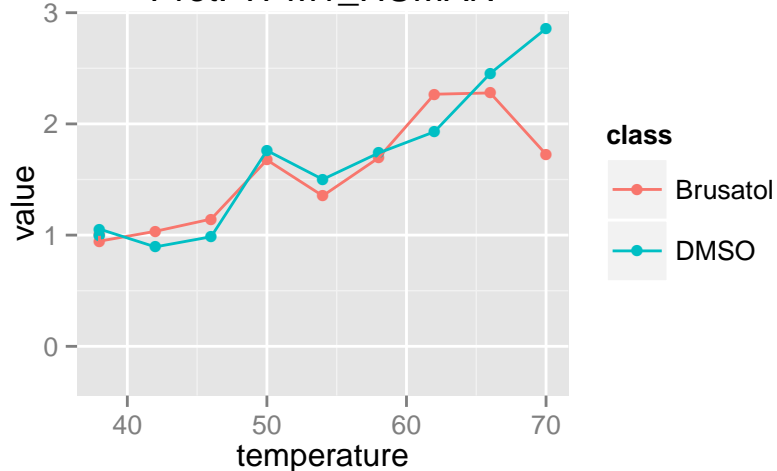

Prot: TPM2\_HUMAN

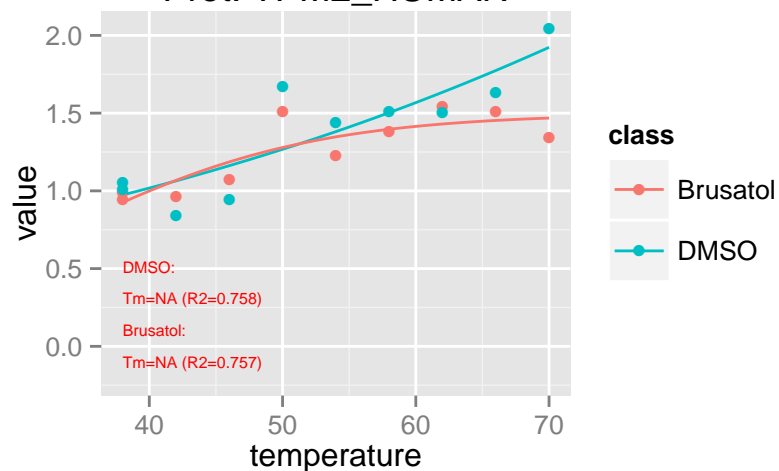

Prot: TPM3\_HUMAN

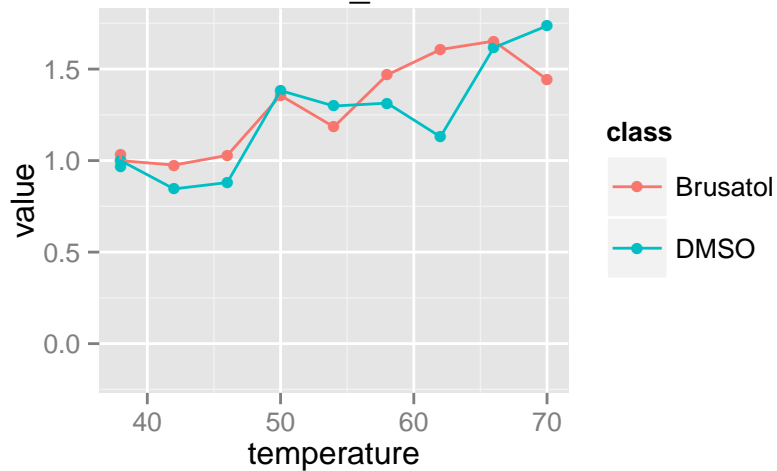

Prot: TPM3L\_HUMAN

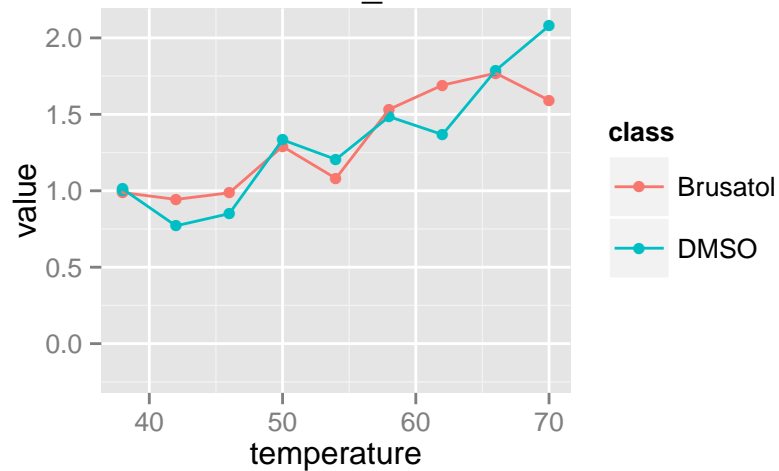

Prot: TPM4\_HUMAN

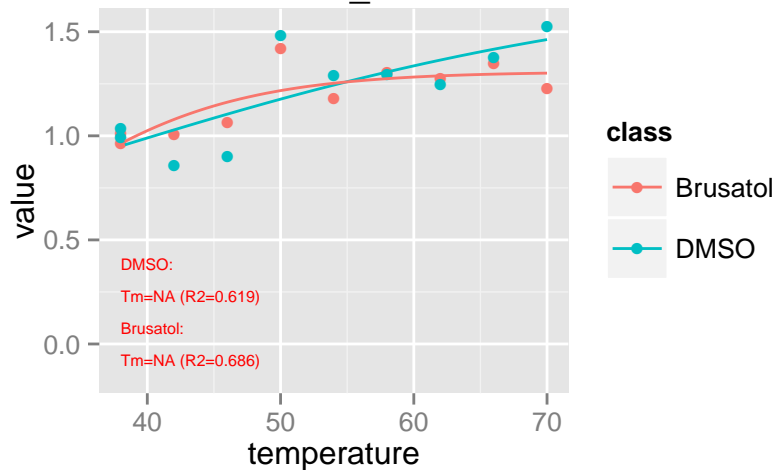

Prot: TPP1\_HUMAN

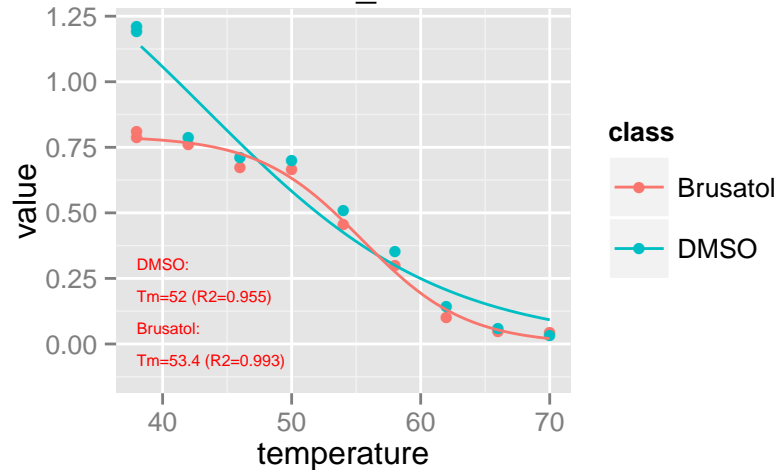

Prot: TPP2\_HUMAN

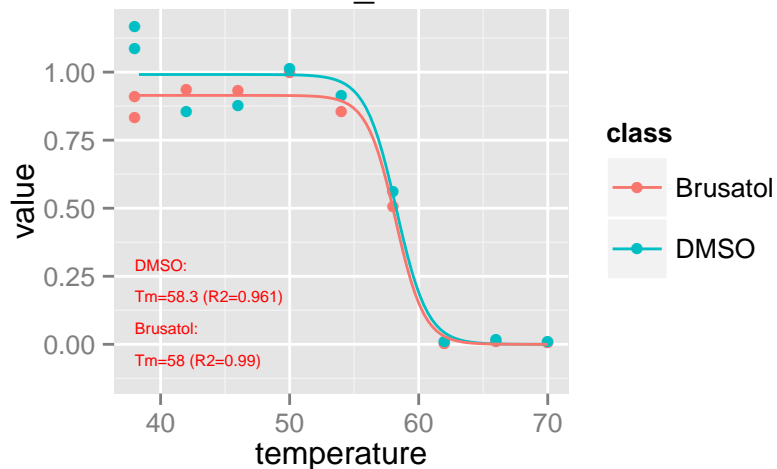

Prot: TPPC1\_HUMAN

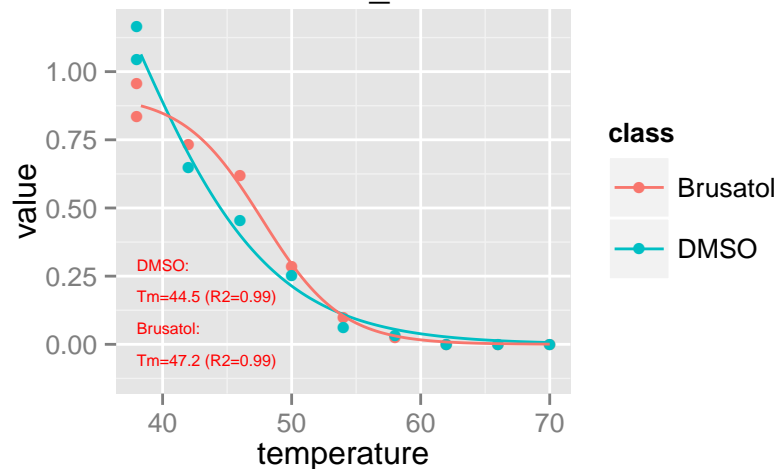

Prot: TPPC3\_HUMAN

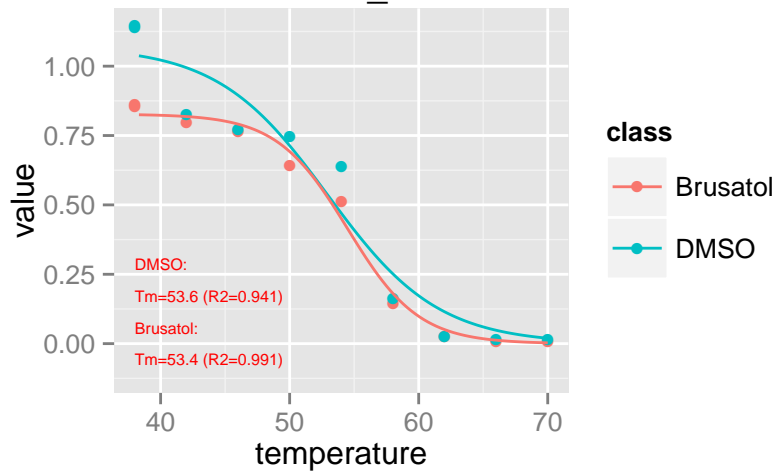

Prot: TPPC4\_HUMAN

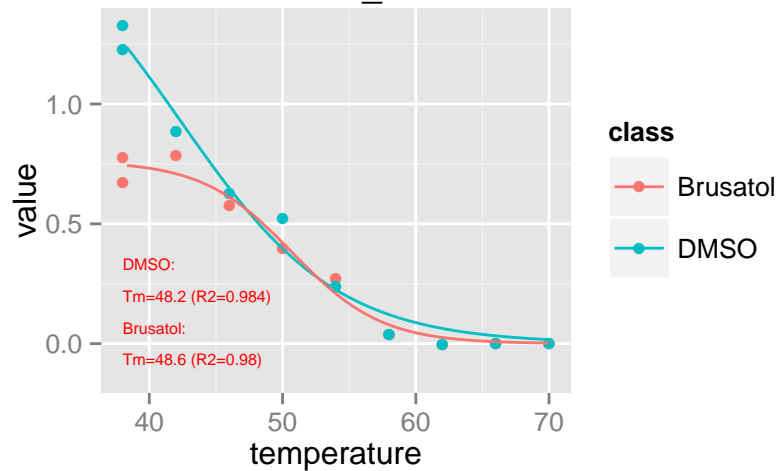

Prot: TPPC8\_HUMAN

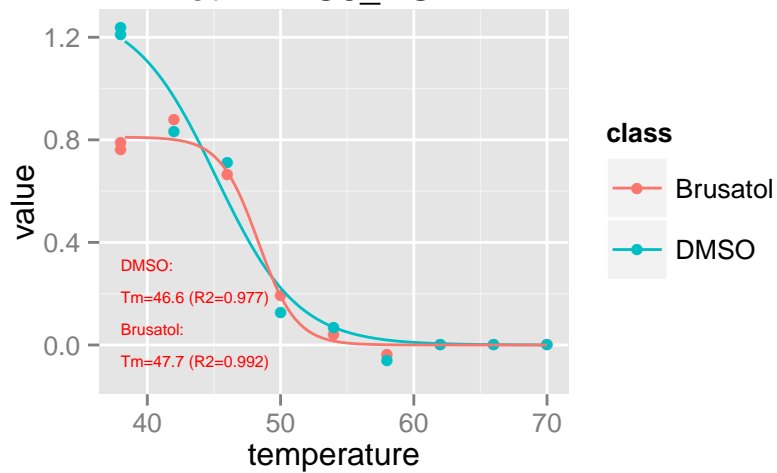

Prot: TPPP\_HUMAN

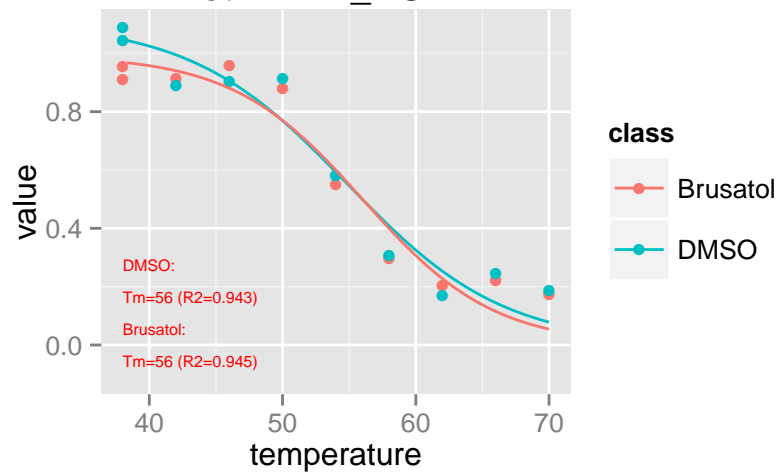

Prot: TPPP3\_HUMAN

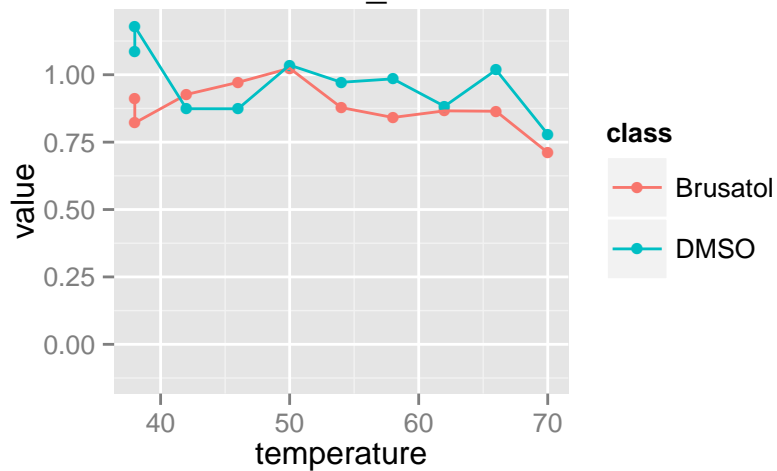

Prot: TPR\_HUMAN

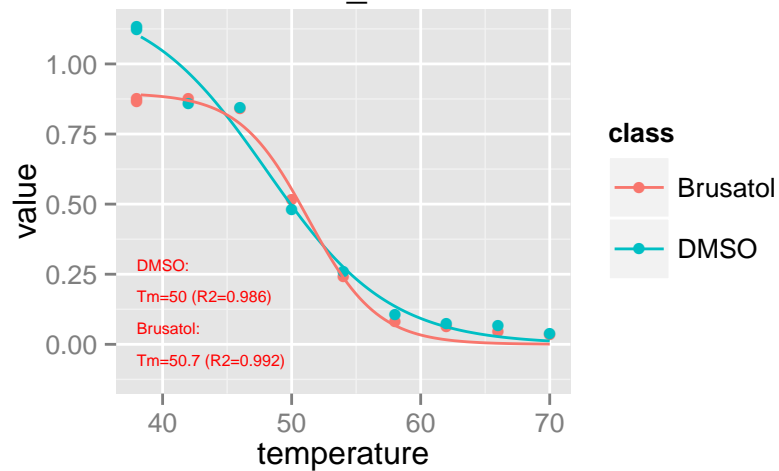

Prot: TPRKB\_HUMAN

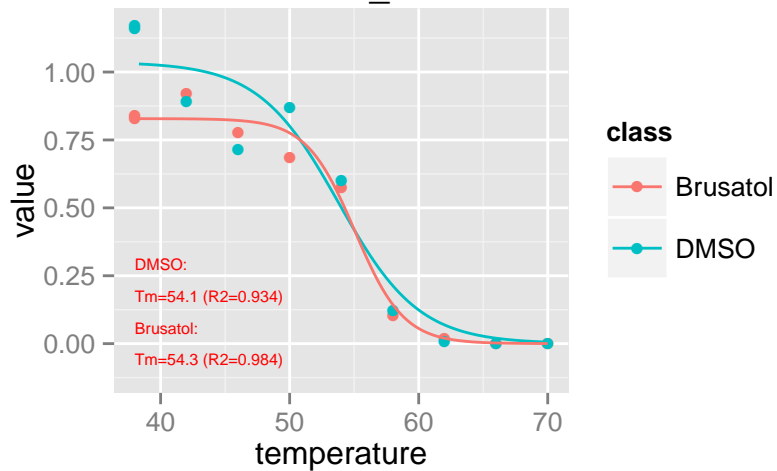

Prot: TPX2\_HUMAN

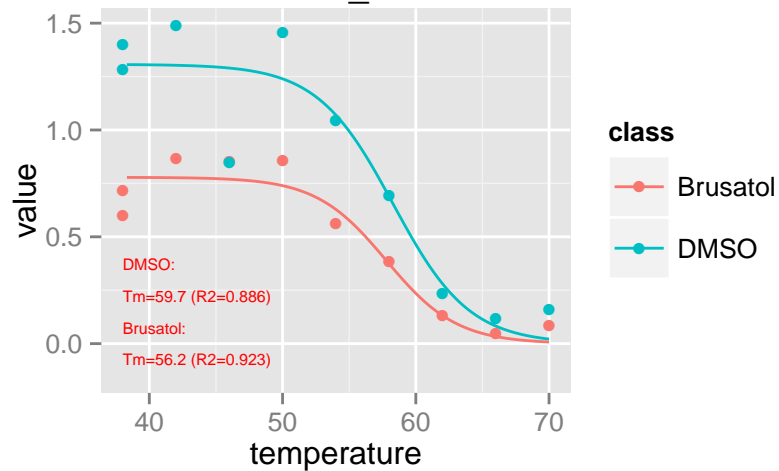

Prot: TR112\_HUMAN

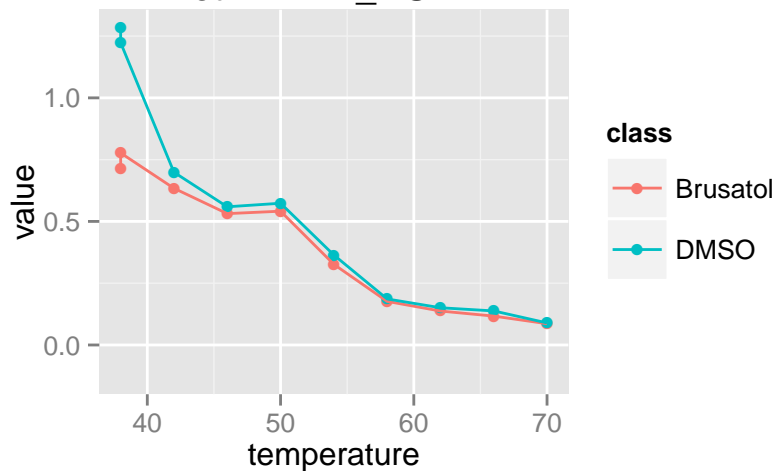

Prot: TR150\_HUMAN

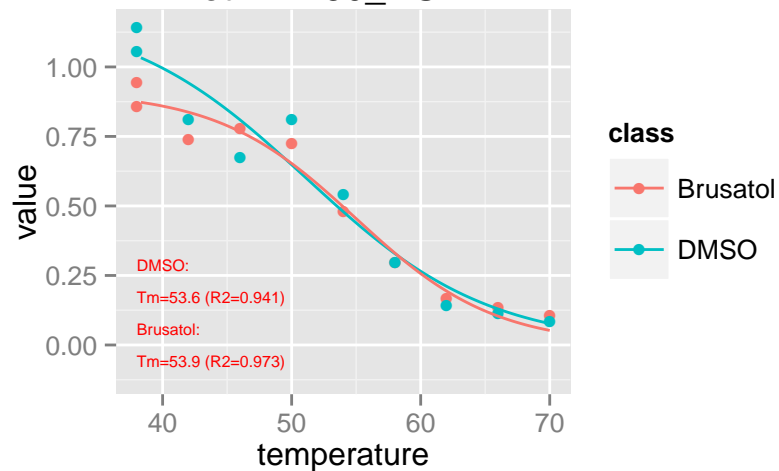

Prot: TR16L\_HUMAN

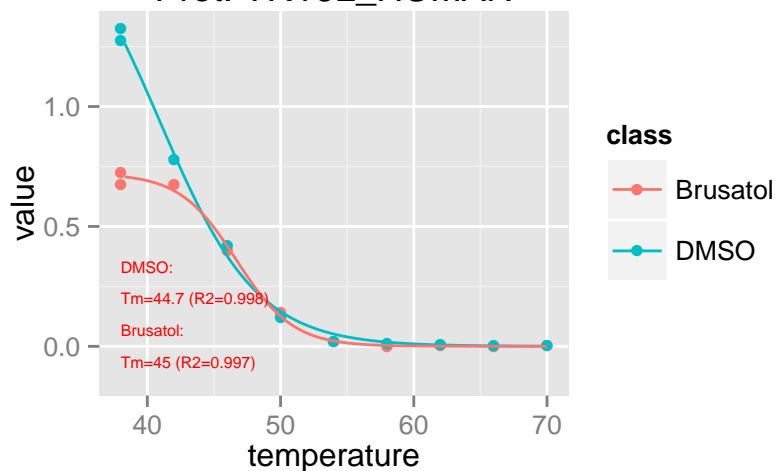

Prot: TR61B\_HUMAN

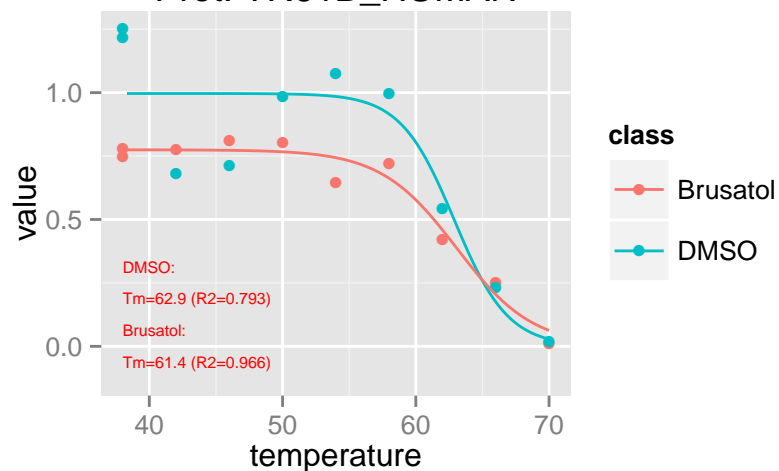

Prot: TRAD1\_HUMAN

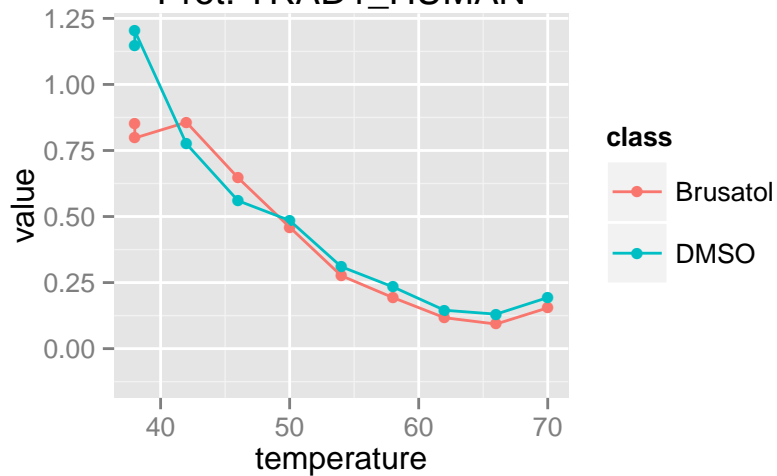

Prot: TRADD\_HUMAN

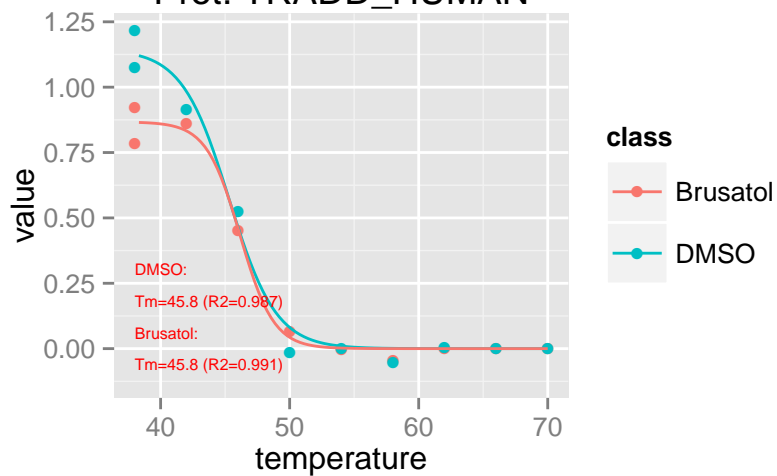

Prot: TRAF2\_HUMAN

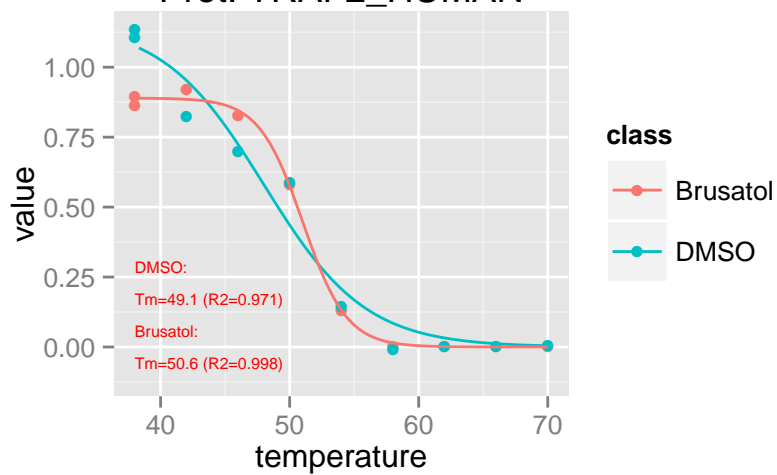

Prot: TRAP1\_HUMAN

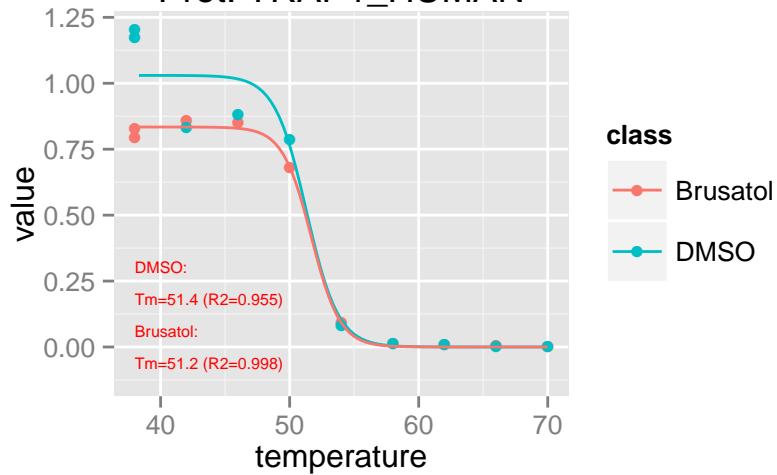

Prot: TRBM\_HUMAN

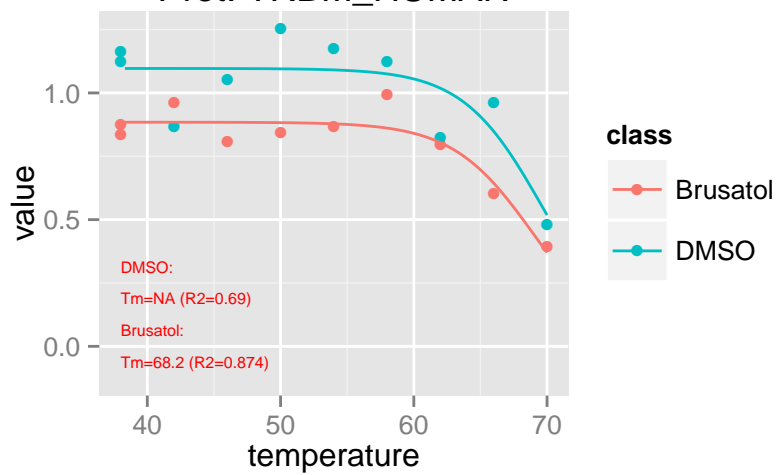

Prot: TRFL\_HUMAN

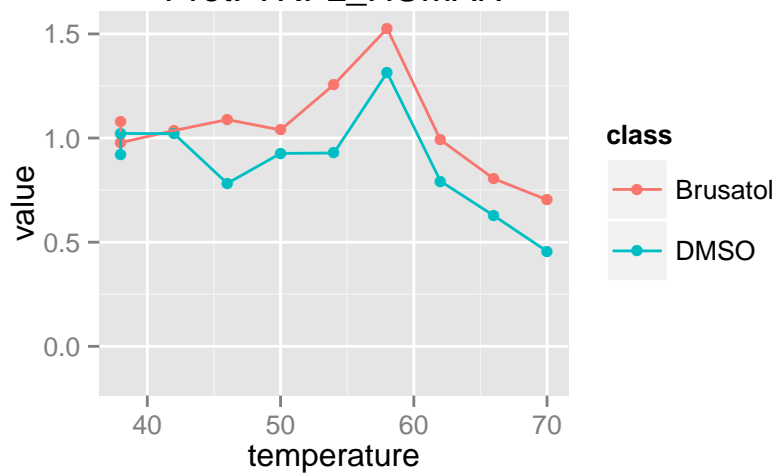



Prot: TRI16\_HUMAN

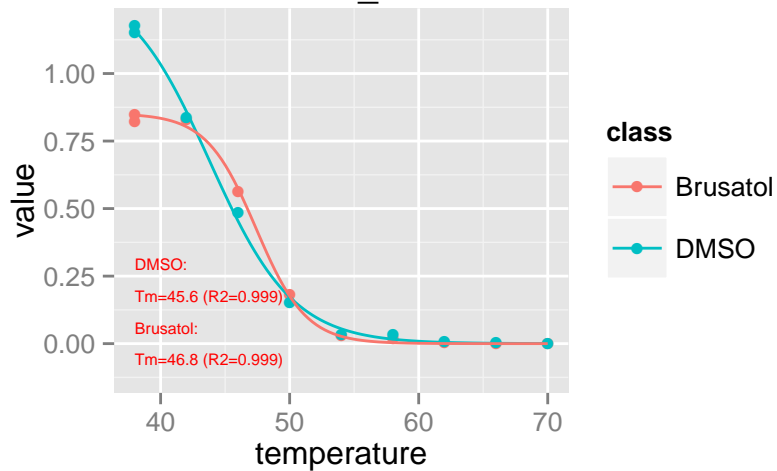

Prot: TRI18\_HUMAN

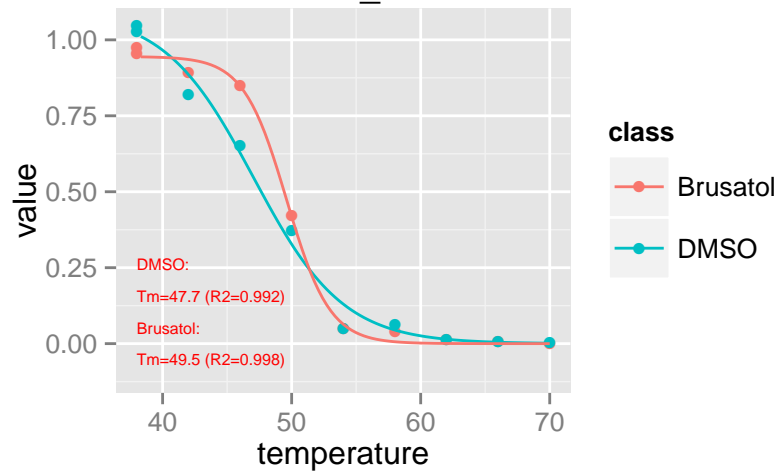

Prot: TRI25\_HUMAN

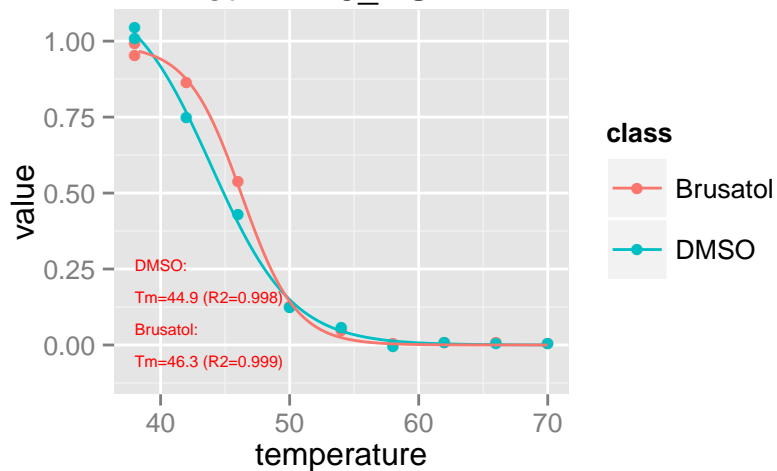

Prot: TRI33\_HUMAN

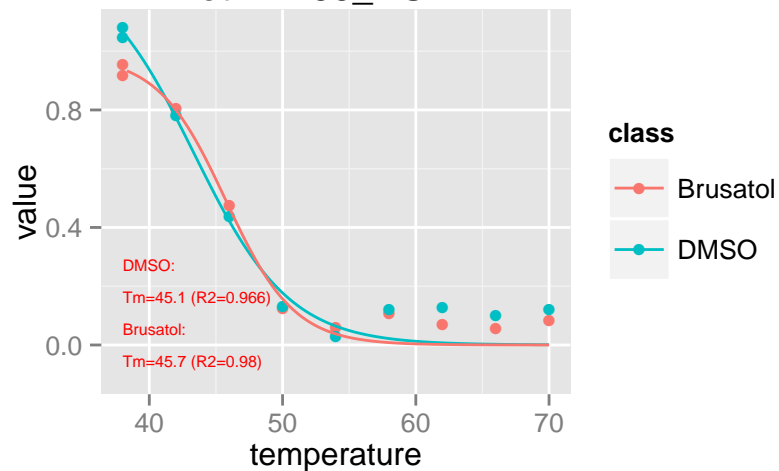

Prot: TRI47\_HUMAN

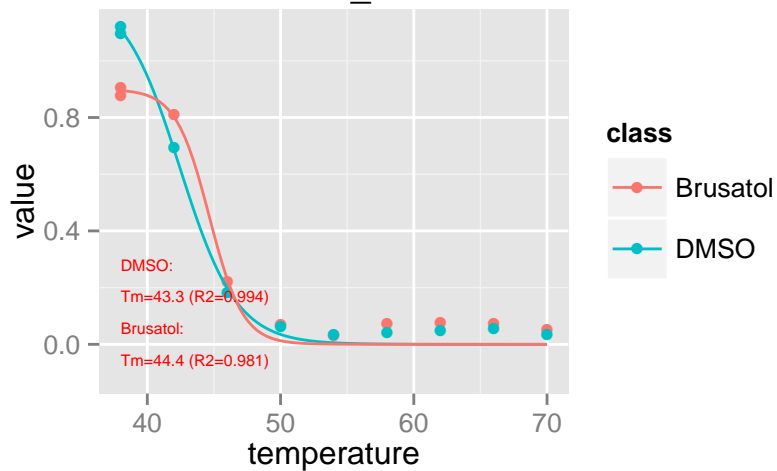

Prot: TRI65\_HUMAN

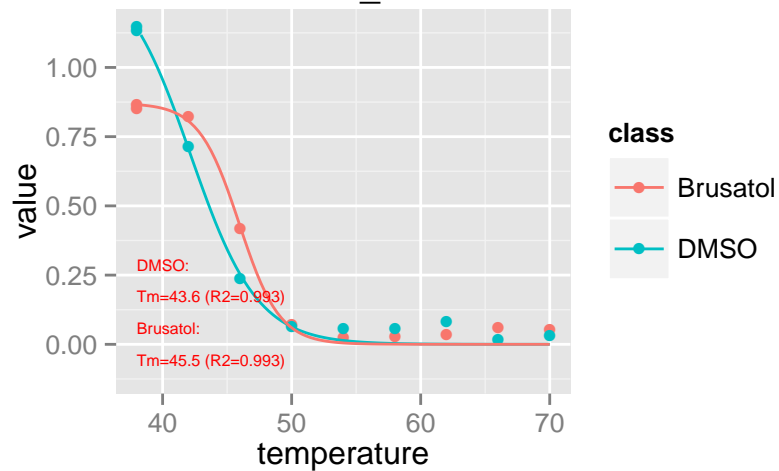

Prot: TRIA1\_HUMAN

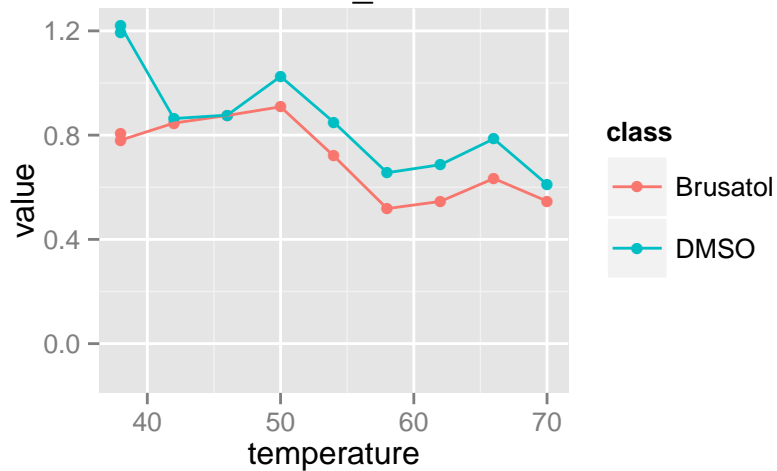

Prot: TRIO\_HUMAN

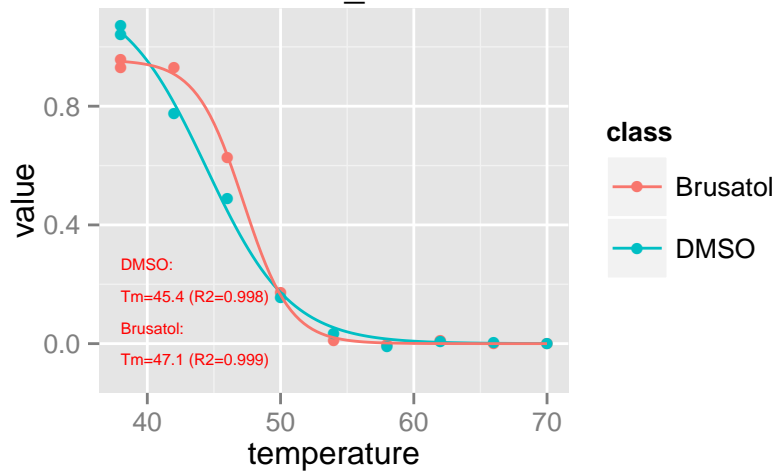

Prot: TRIP6\_HUMAN

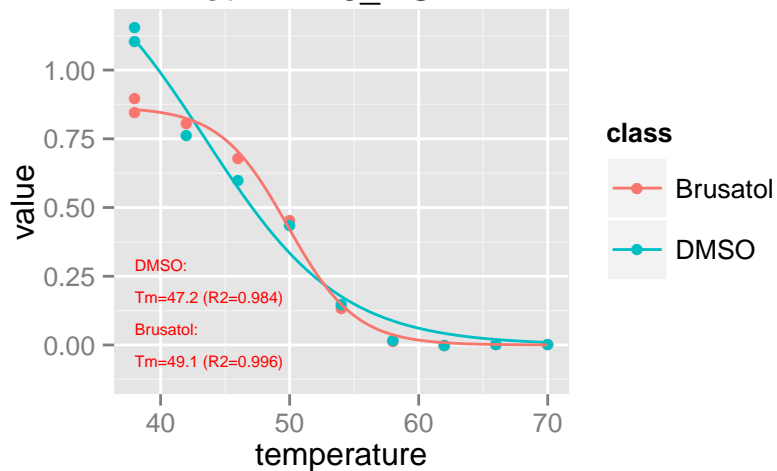

Prot: TRIPC\_HUMAN

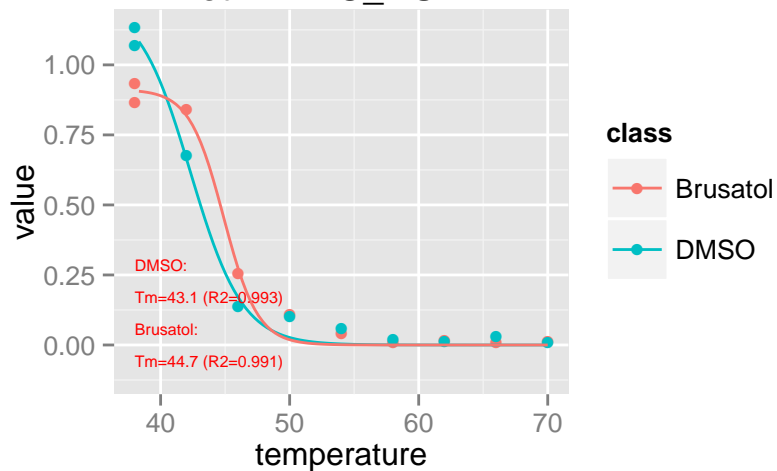

Prot: TRM1\_HUMAN

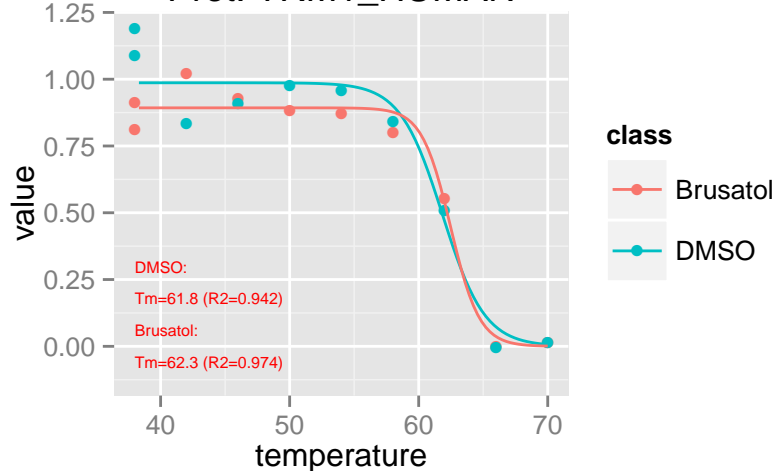

Prot: TRM11\_HUMAN

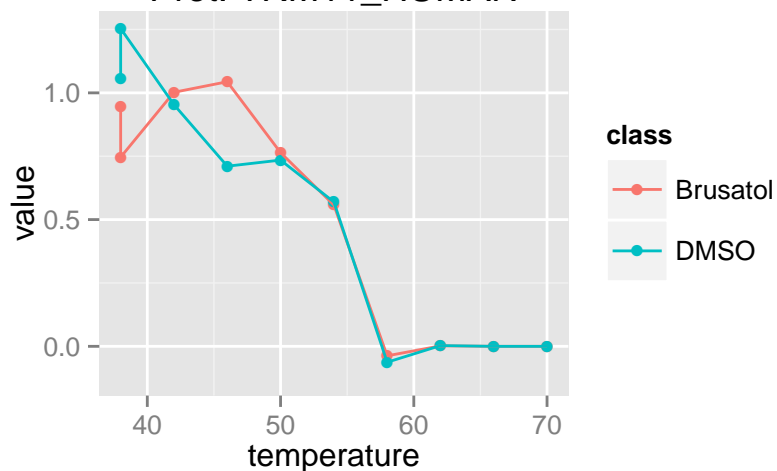

Prot: TRM1L\_HUMAN

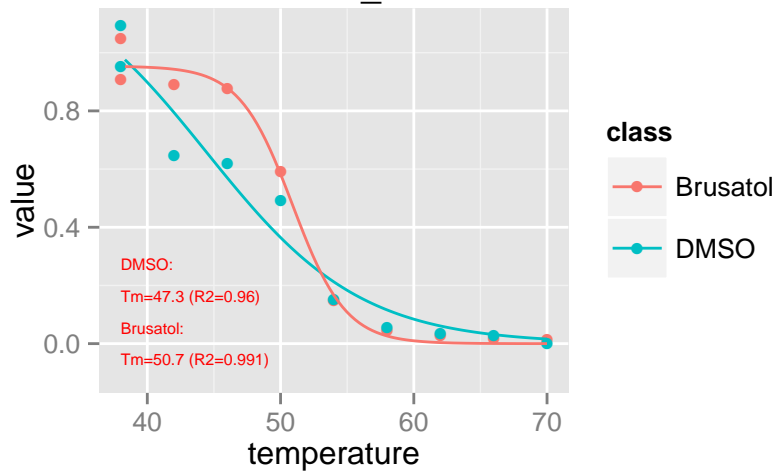

Prot: TRM5\_HUMAN

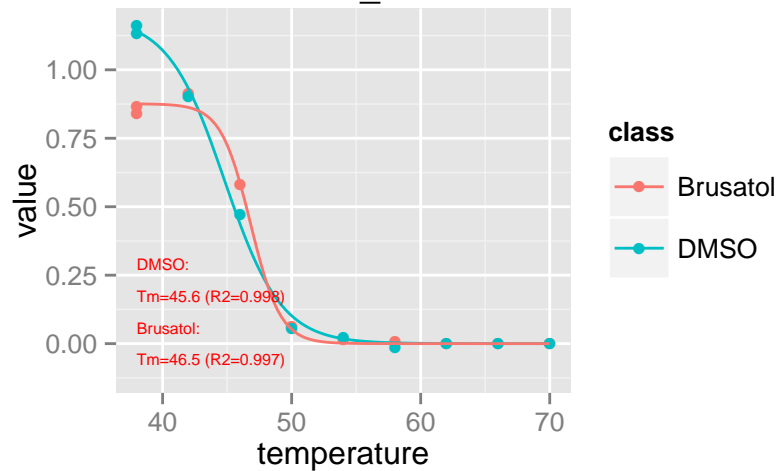

Prot: TRM6\_HUMAN

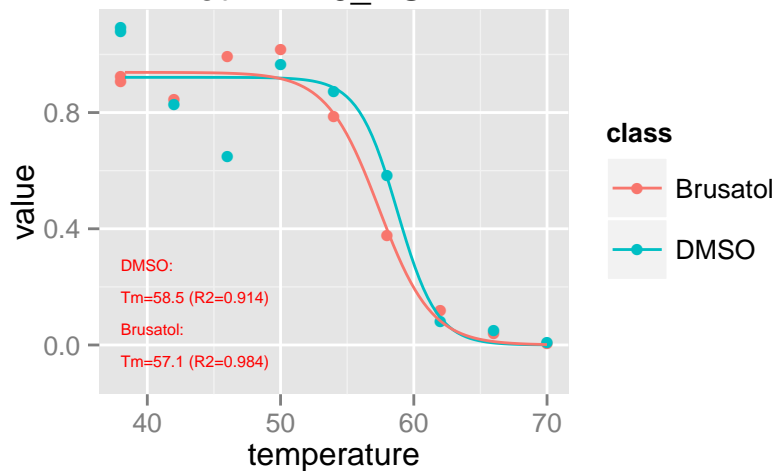

Prot: TRM61\_HUMAN

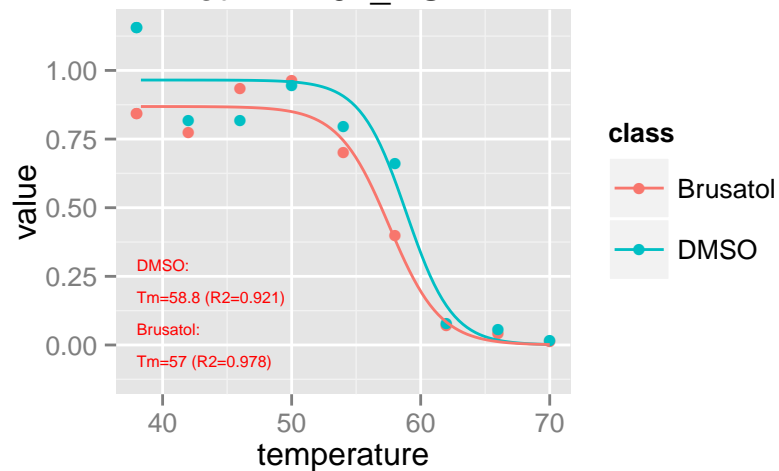

Prot: TRMB\_HUMAN

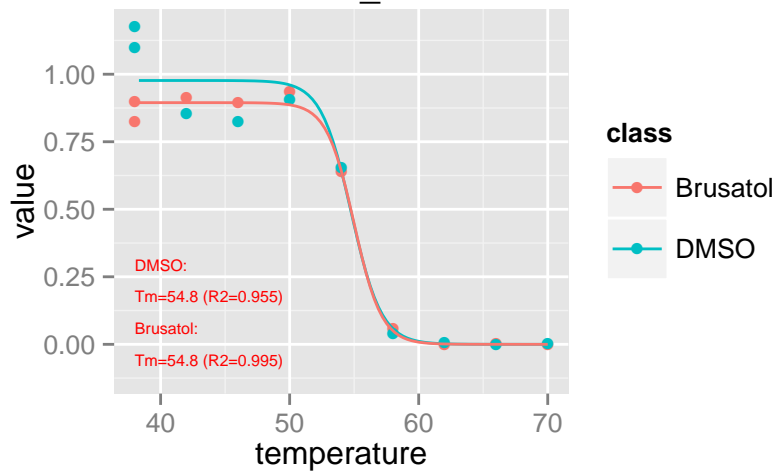

Prot: TRNT1\_HUMAN

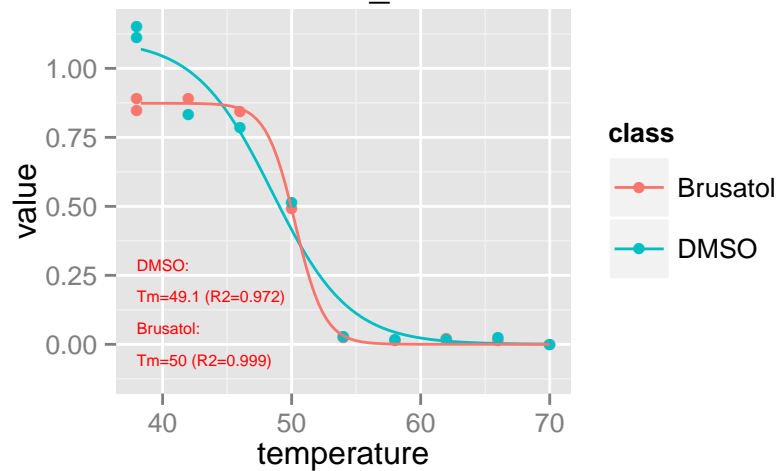

Prot: TRRAP\_HUMAN

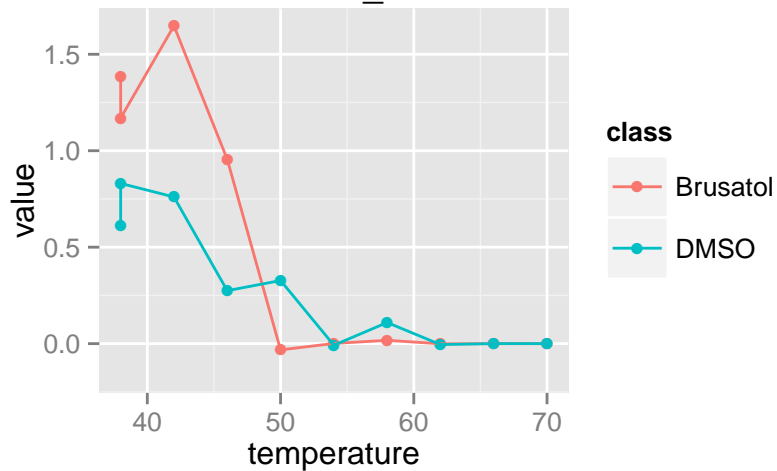

Prot: TRUA\_HUMAN

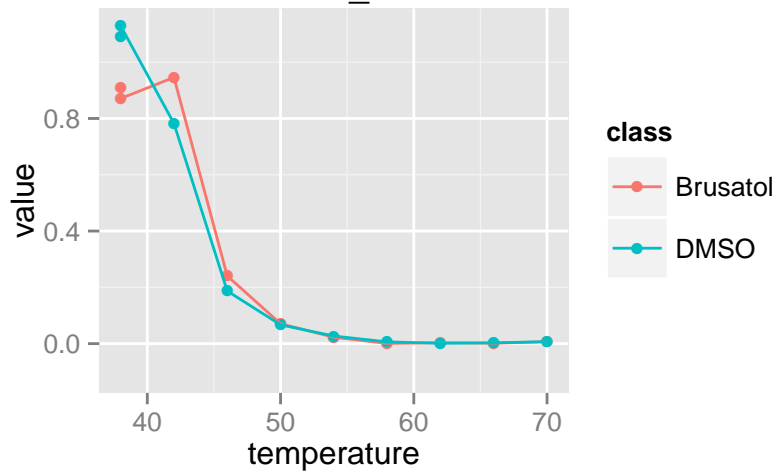

Prot: TRUB1\_HUMAN

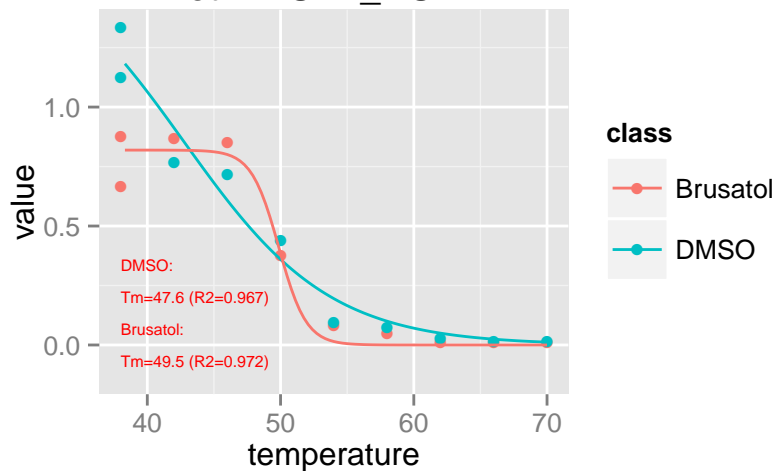

Prot: TRXR1\_HUMAN

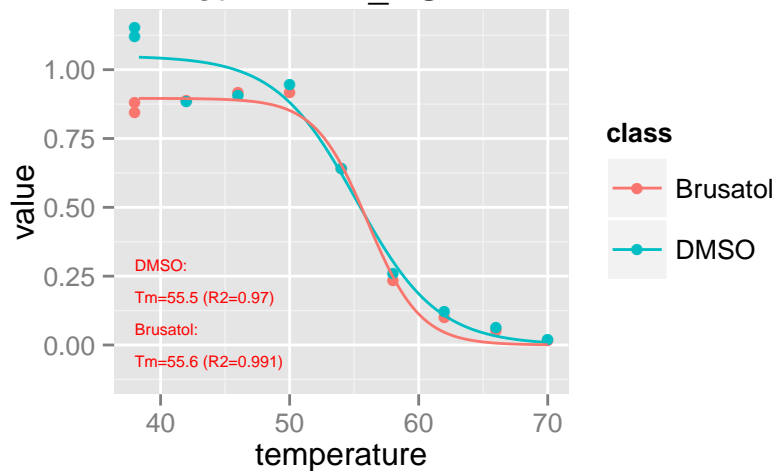

Prot: TRXR2\_HUMAN

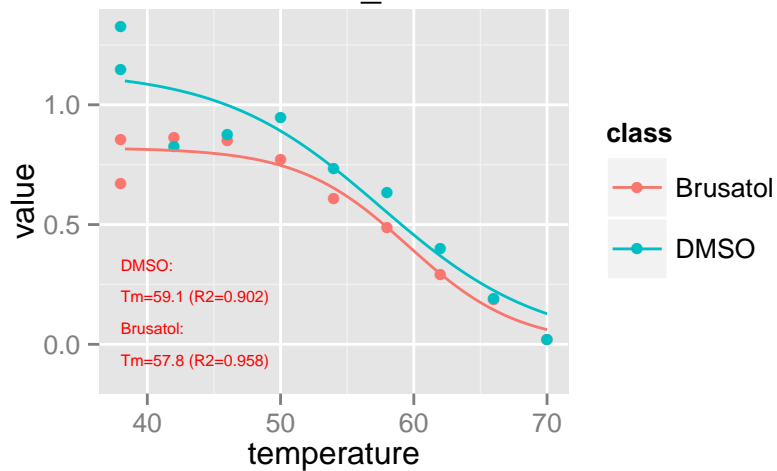

Prot: TRY1\_BOVINC

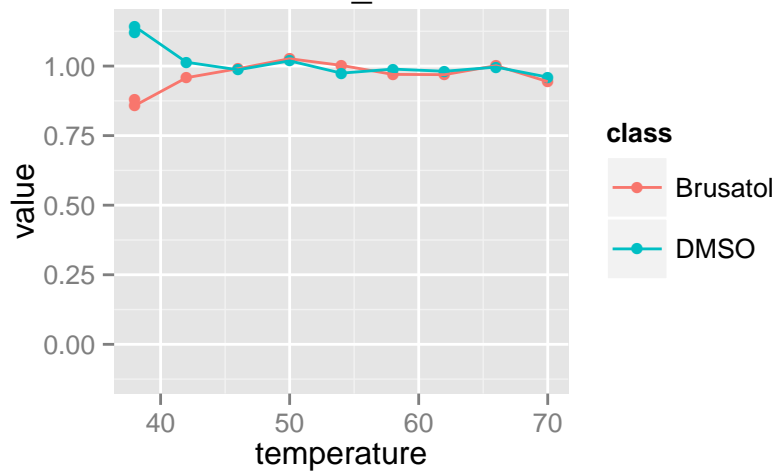

Prot: TRY1\_HUMAN

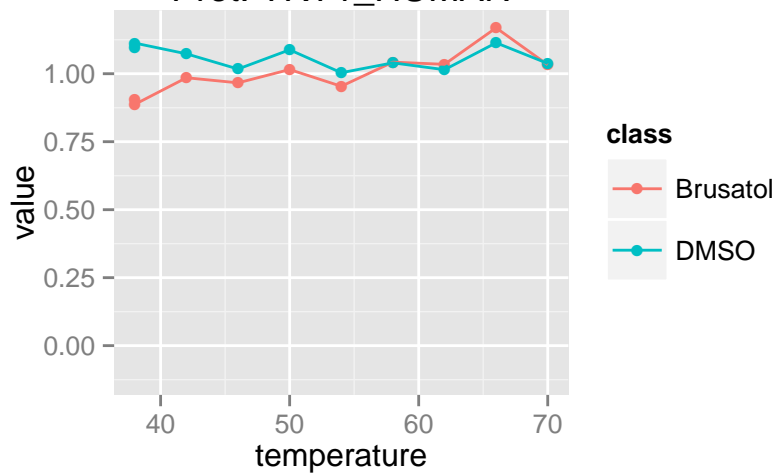

Prot: TRYP\_PIGC

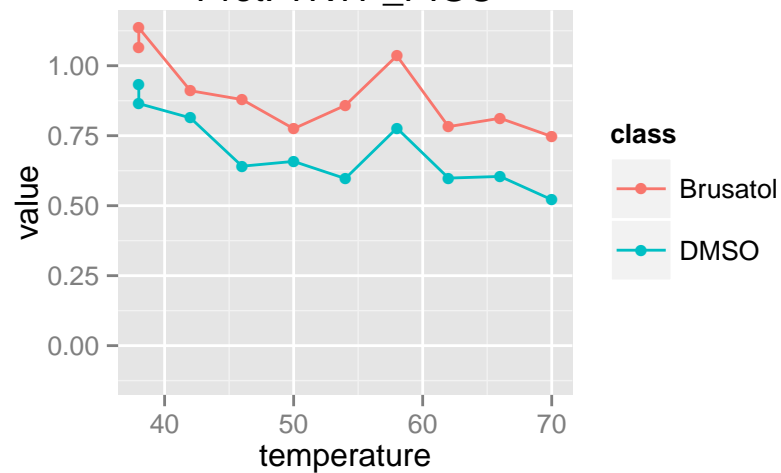

Prot: TS101\_HUMAN

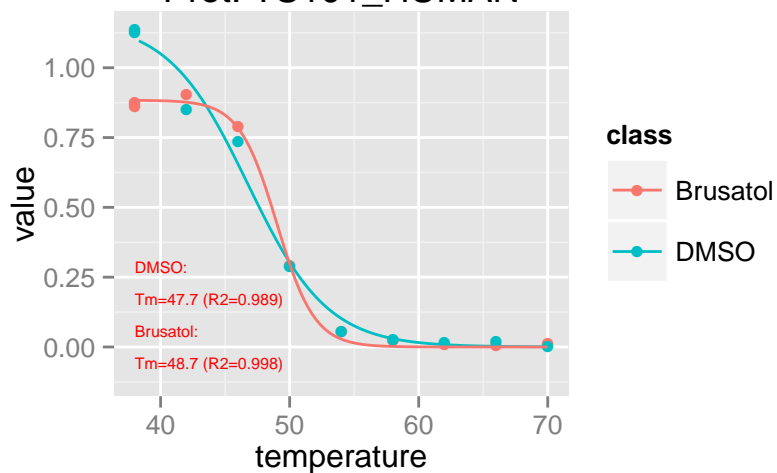

Prot: TSN\_HUMAN

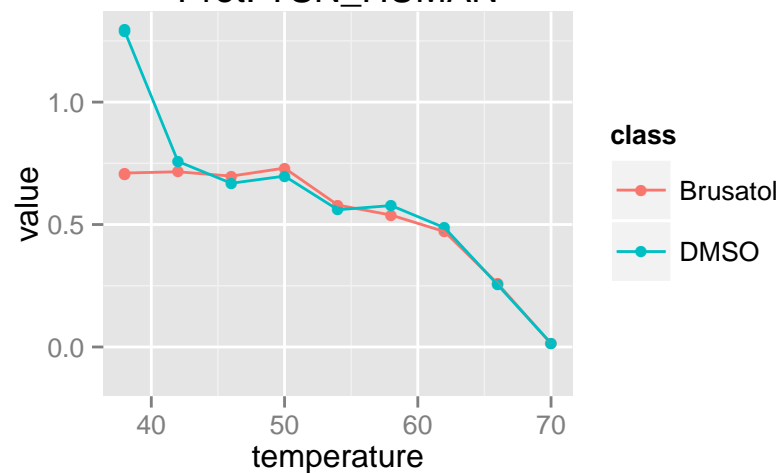

Prot: TSNAX\_HUMAN

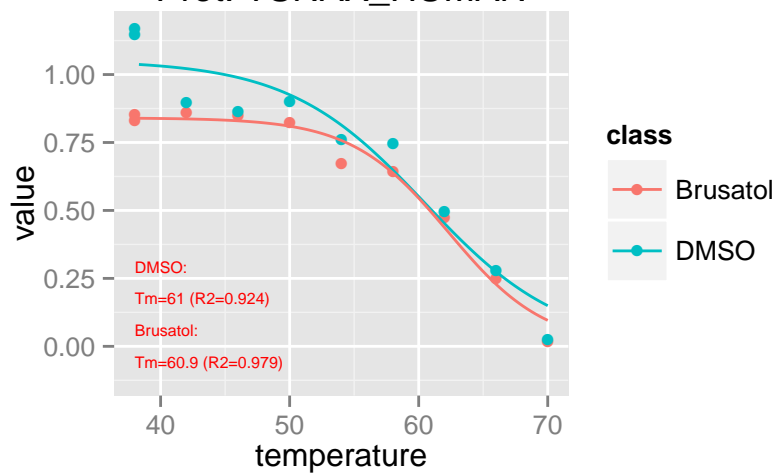

Prot: TSR1\_HUMAN

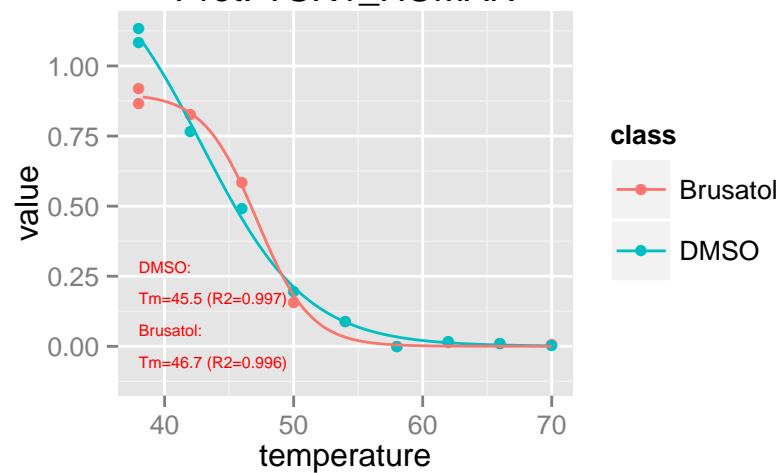

Prot: TSR3\_HUMAN

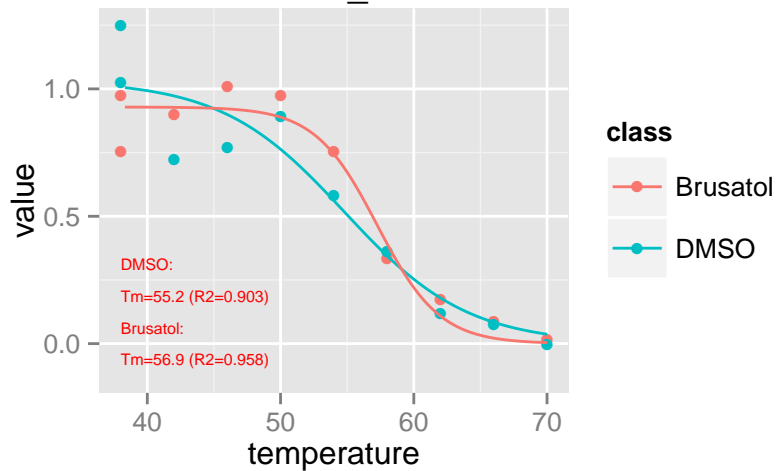

Prot: TSSC1\_HUMAN

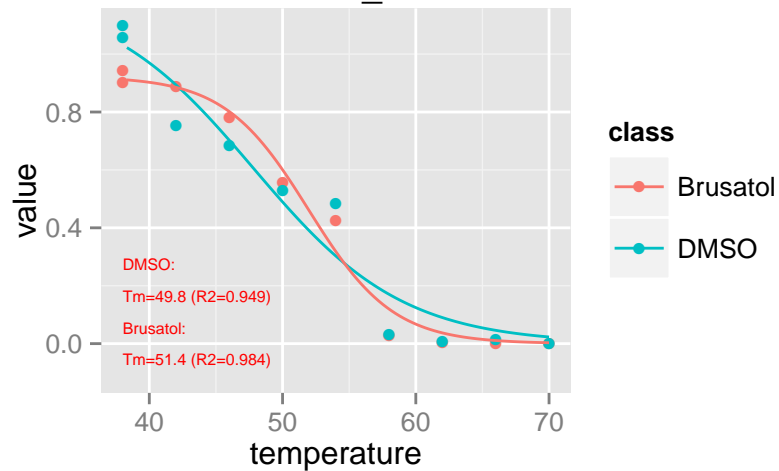

Prot: TSSC4\_HUMAN

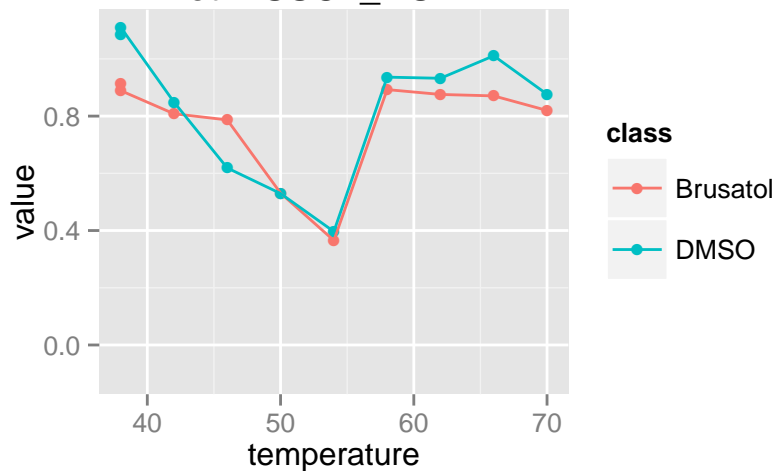

Prot: TT39C\_HUMAN

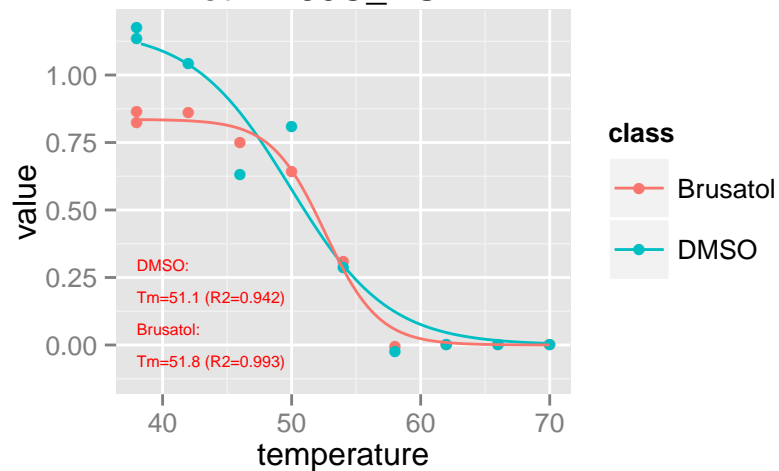

Prot: TTC1\_HUMAN

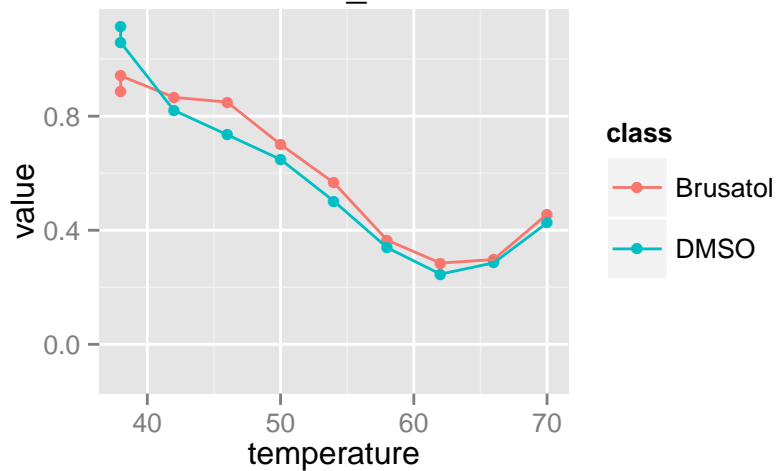

Prot: TTC27\_HUMAN

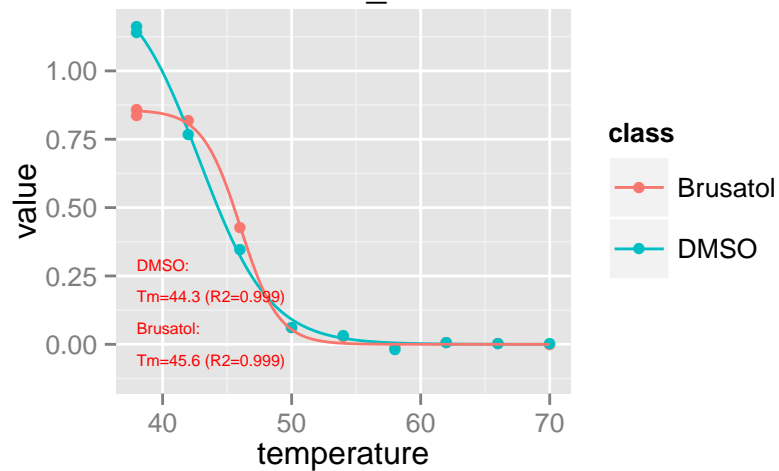

Prot: TTC37\_HUMAN

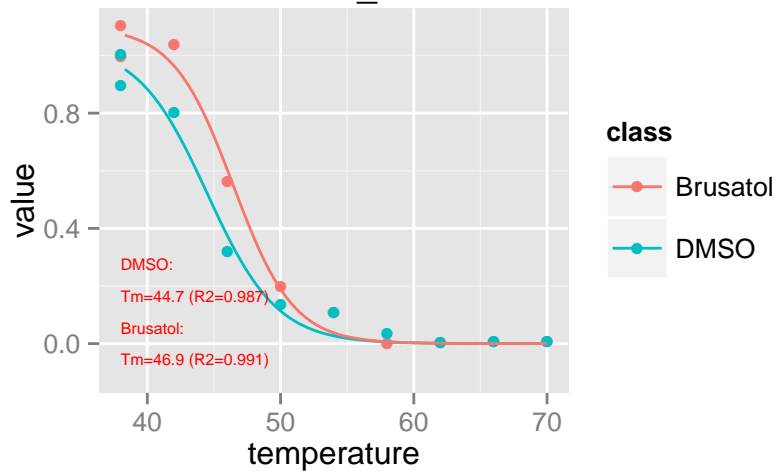

Prot: TTC4\_HUMAN

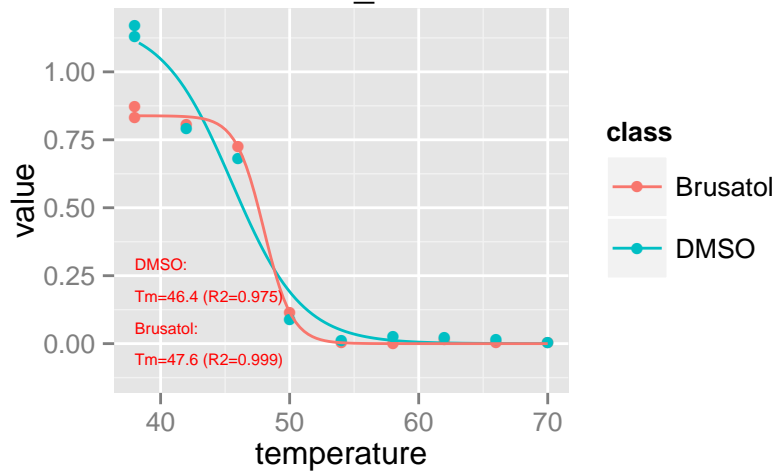

Prot: TTC9C\_HUMAN

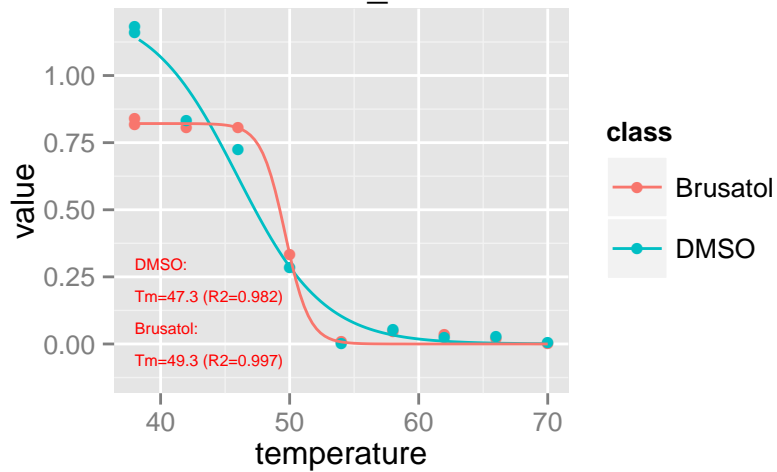

Prot: TTI1\_HUMAN

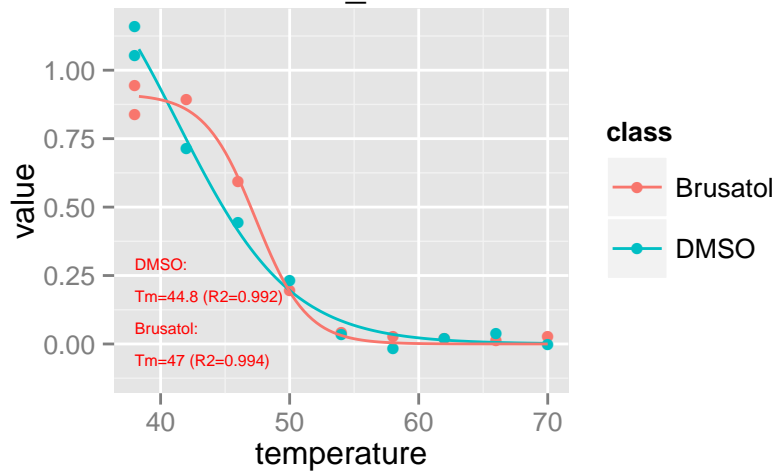

Prot: TTI2\_HUMAN

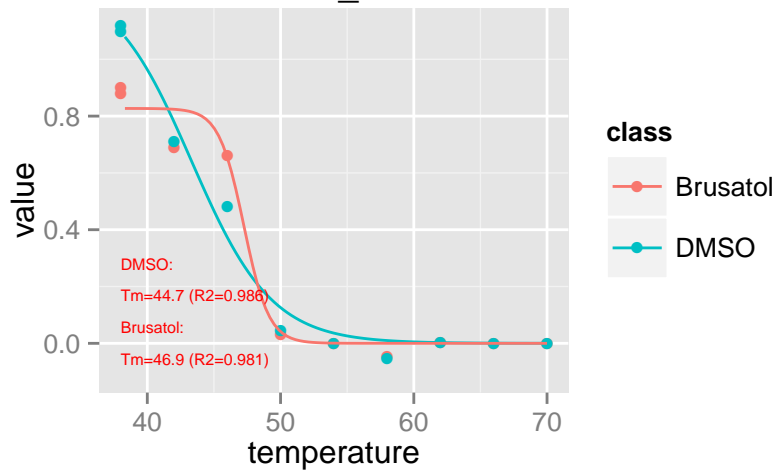

Prot: TTL12\_HUMAN

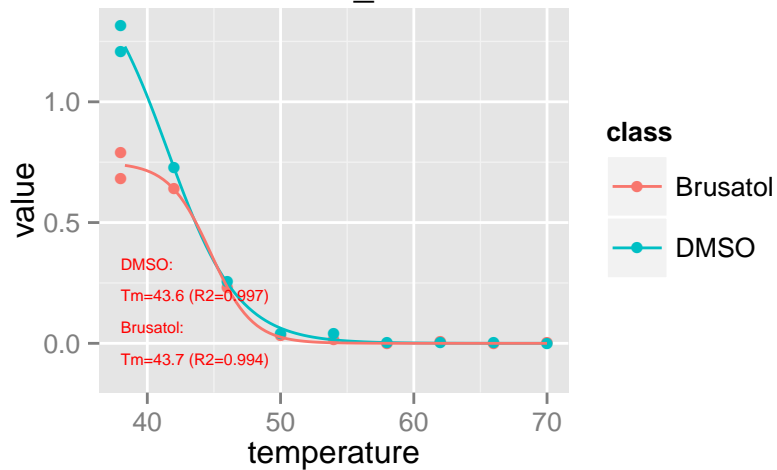

Prot: TUFT1\_HUMAN

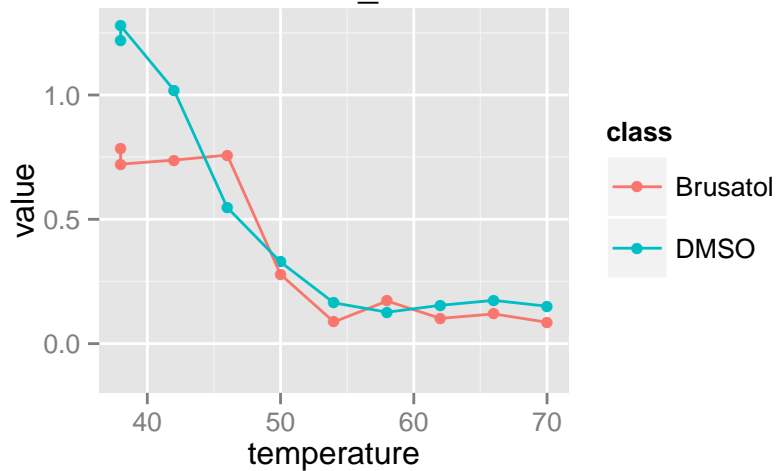

Prot: TWF1\_HUMAN

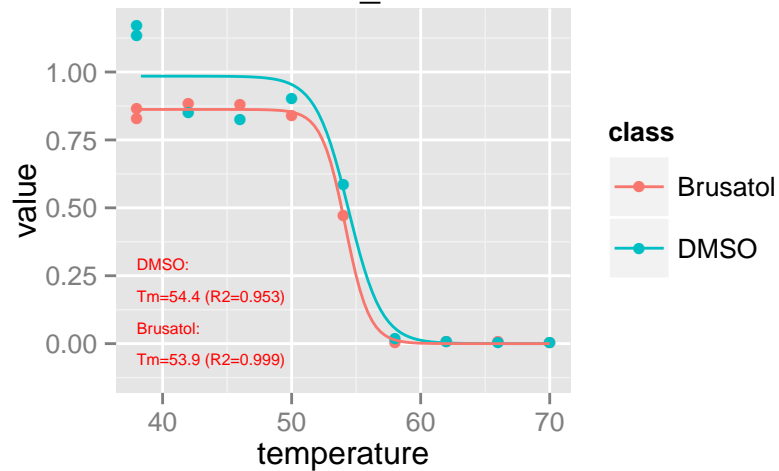

Prot: TWF2\_HUMAN

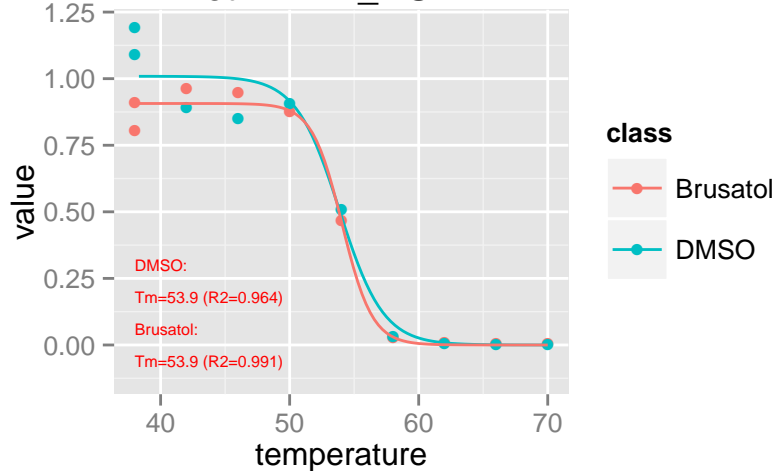

Prot: TX1B3\_HUMAN

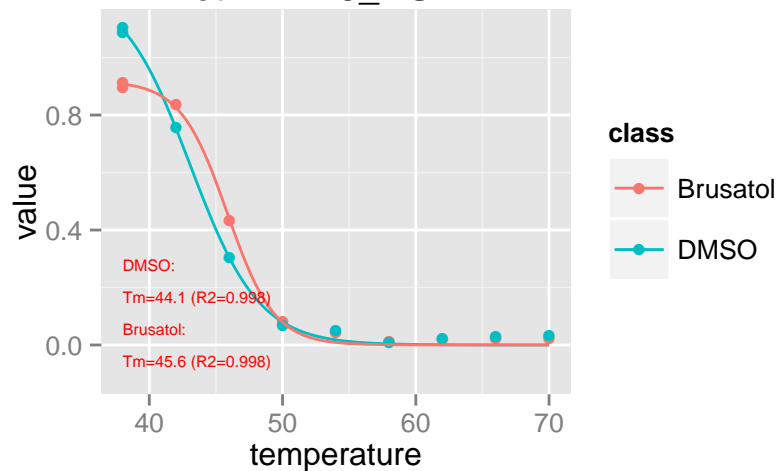

Prot: TXD12\_HUMAN

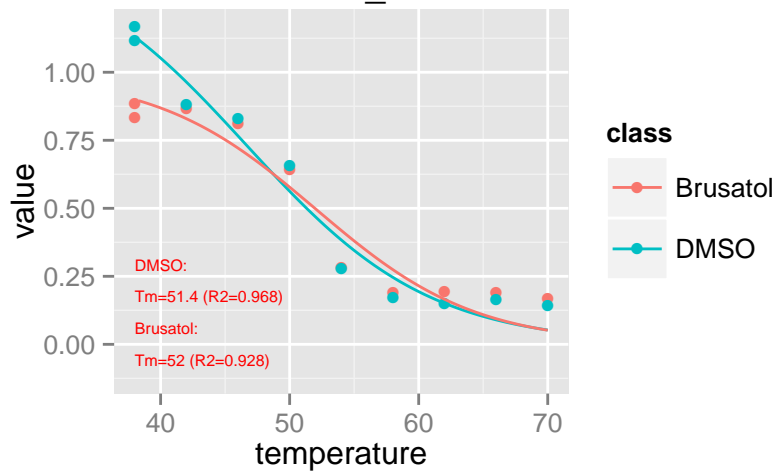

Prot: TXD17\_HUMAN

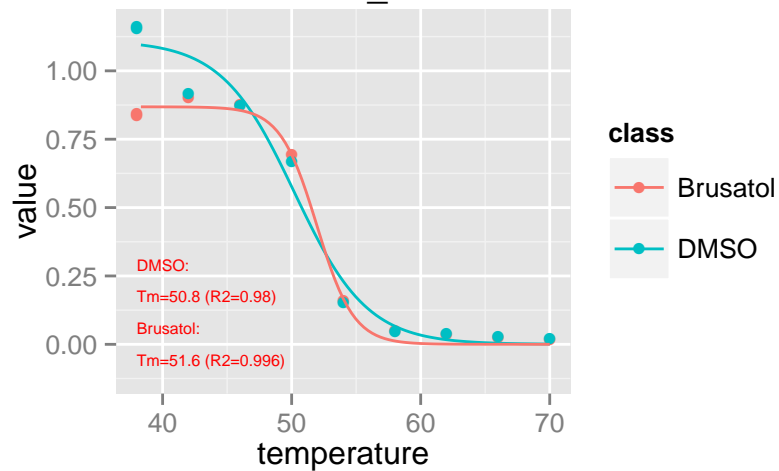



Prot: TXLNA\_HUMAN

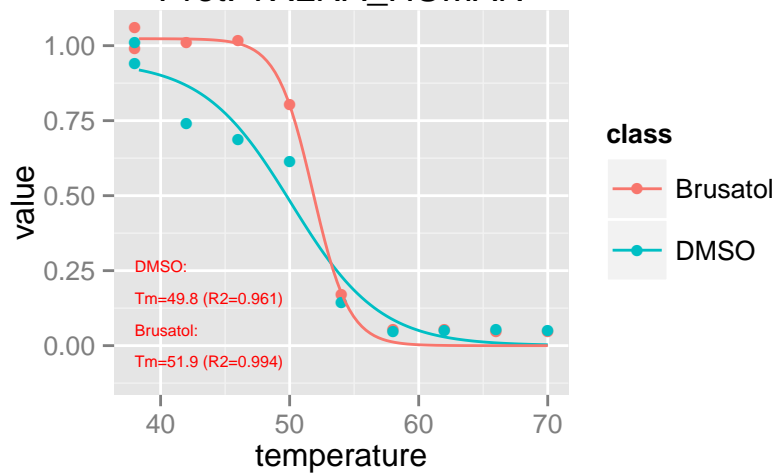

Prot: TXLNG\_HUMAN

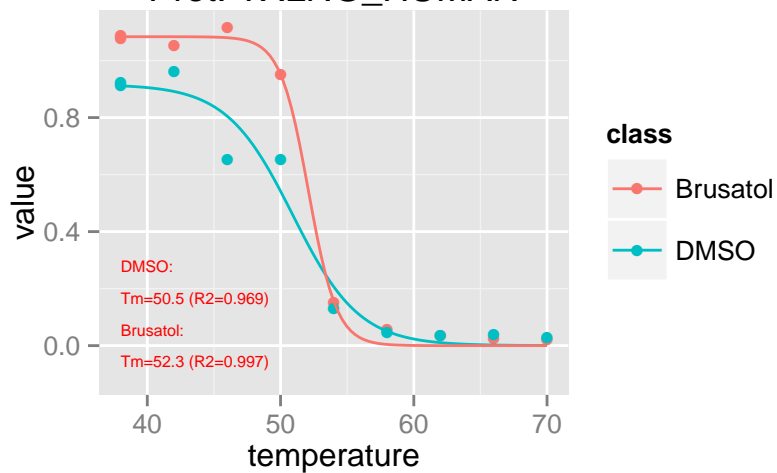

Prot: TXND5\_HUMAN

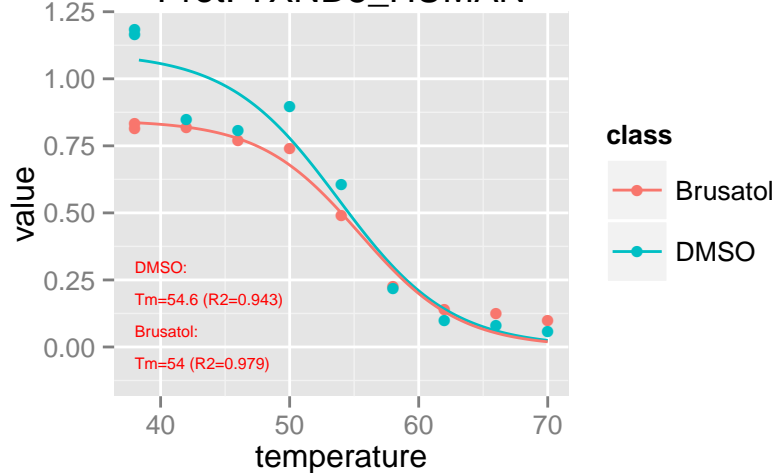

Prot: TXND9\_HUMAN

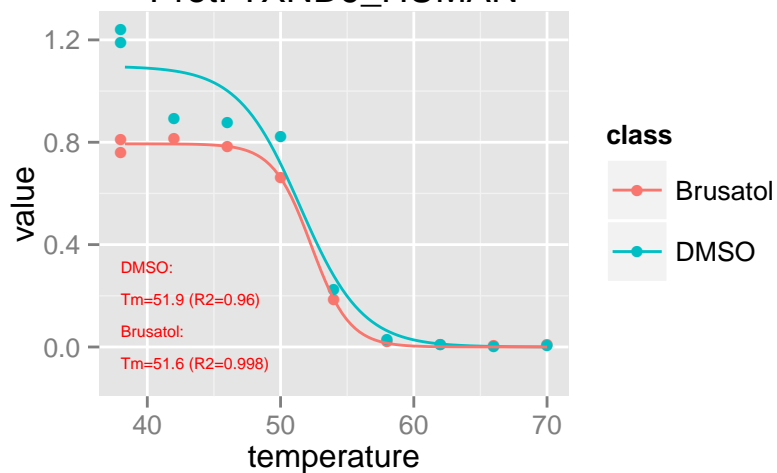

Prot: TXNL1\_HUMAN

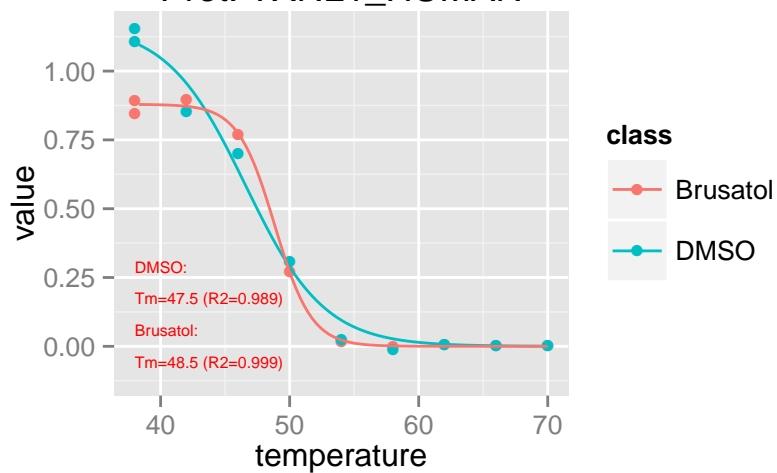

Prot: TYB10\_HUMAN

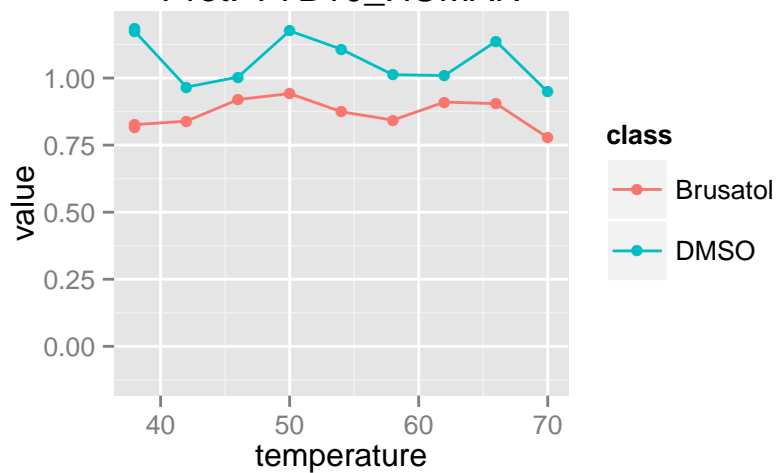

Prot: TYDP1\_HUMAN

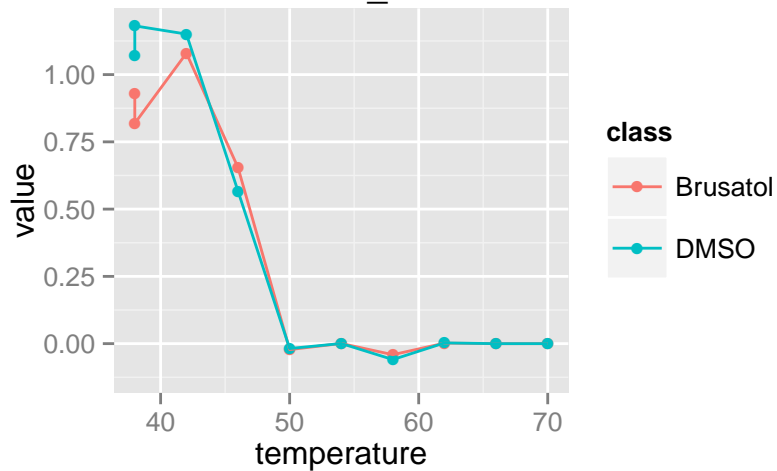

Prot: TYPH\_HUMAN

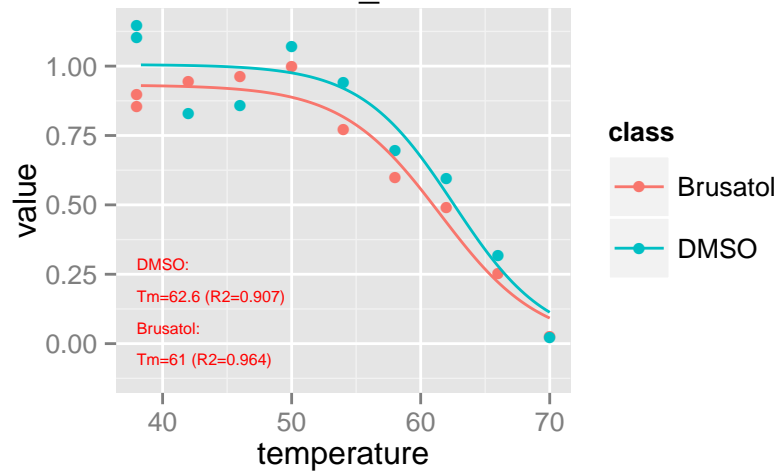

Prot: TYSY\_HUMAN

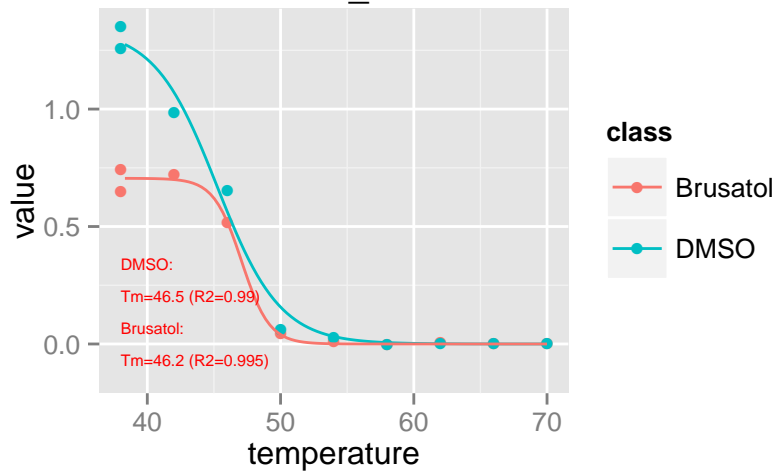

Prot: U119B\_HUMAN

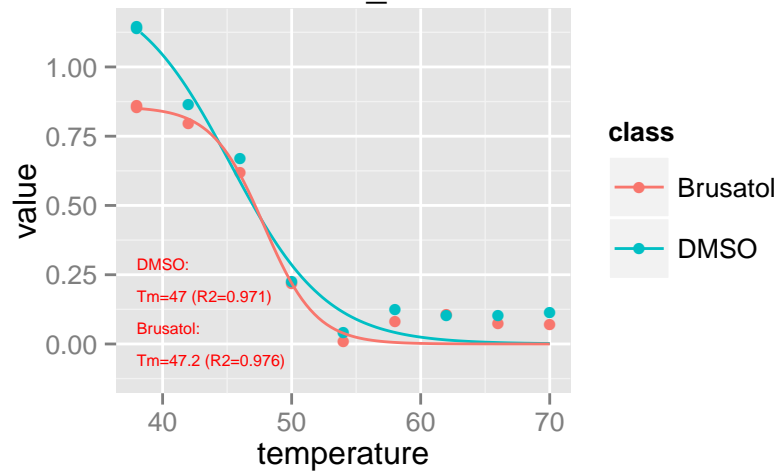

Prot: U2AF1\_HUMAN

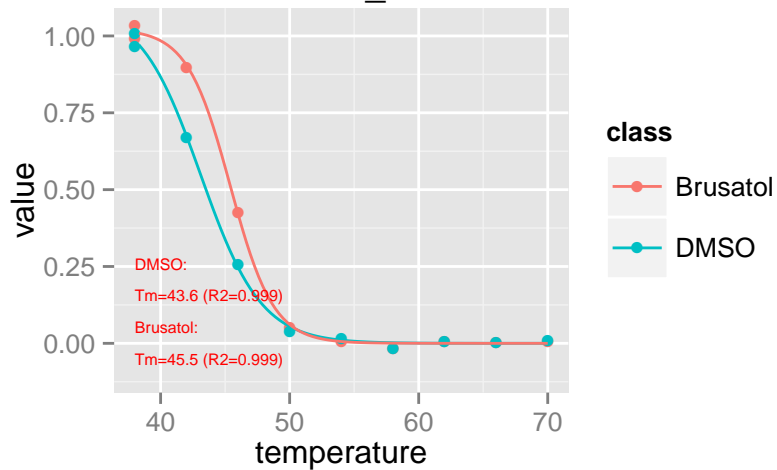

Prot: U2AF2\_HUMAN

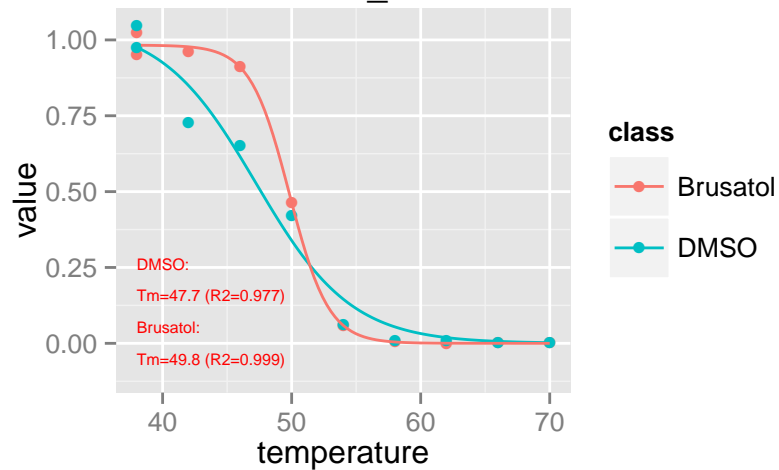

Prot: U3IP2\_HUMAN

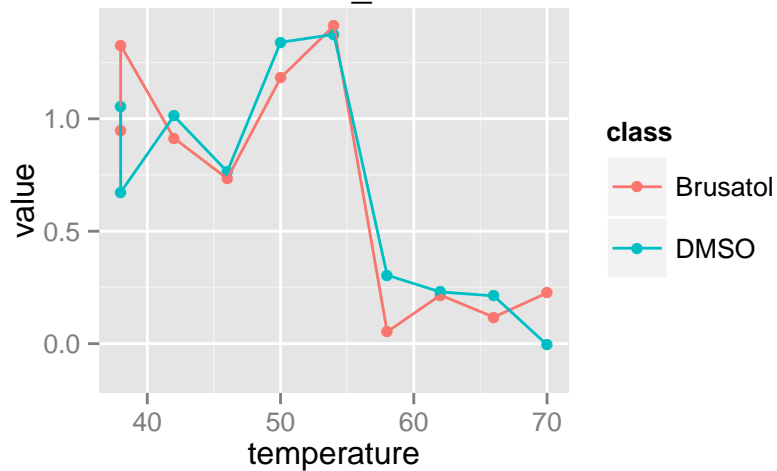

Prot: U520\_HUMAN

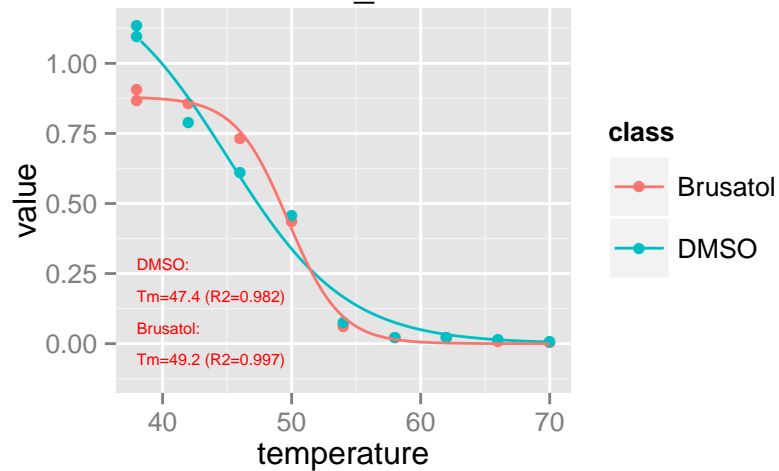

Prot: U5S1\_HUMAN

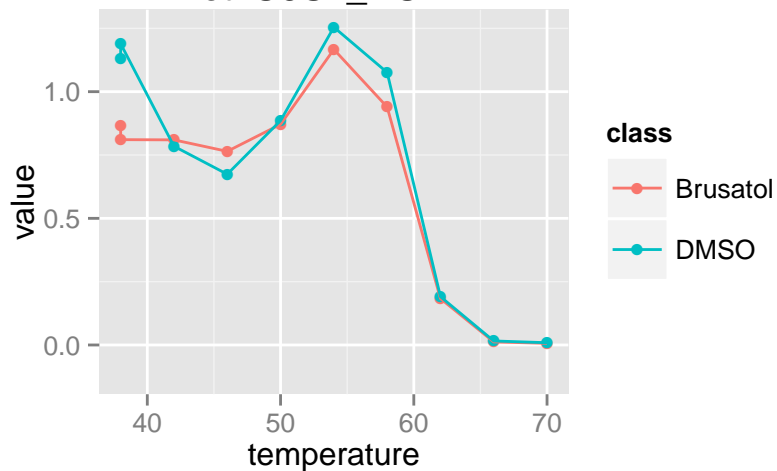

Prot: UACA\_HUMAN

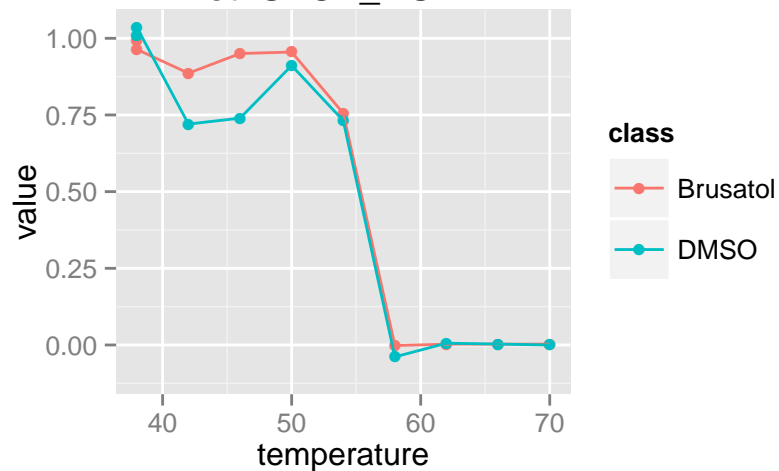

Prot: UB2D1\_HUMAN

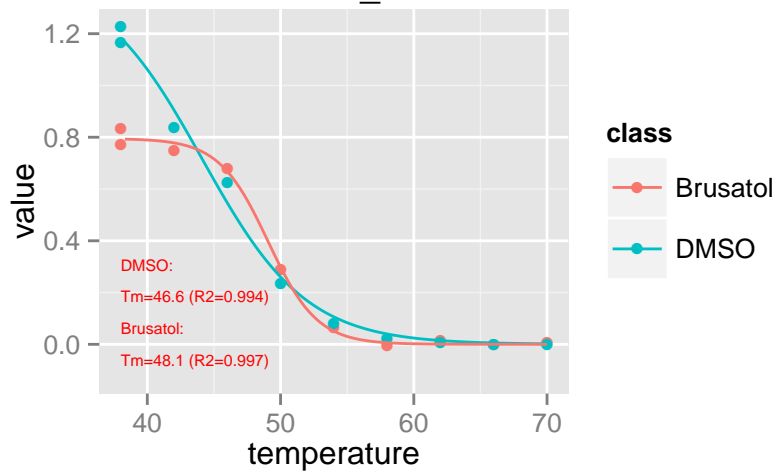

Prot: UB2D2\_HUMAN

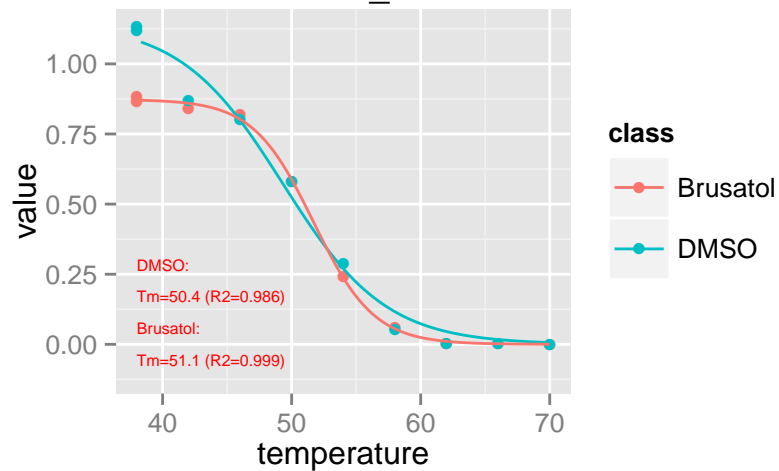

Prot: UB2E1\_HUMAN

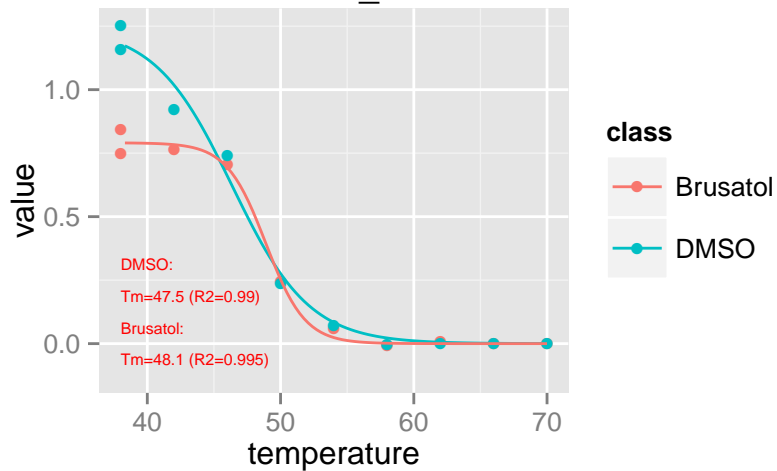

Prot: UB2G1\_HUMAN

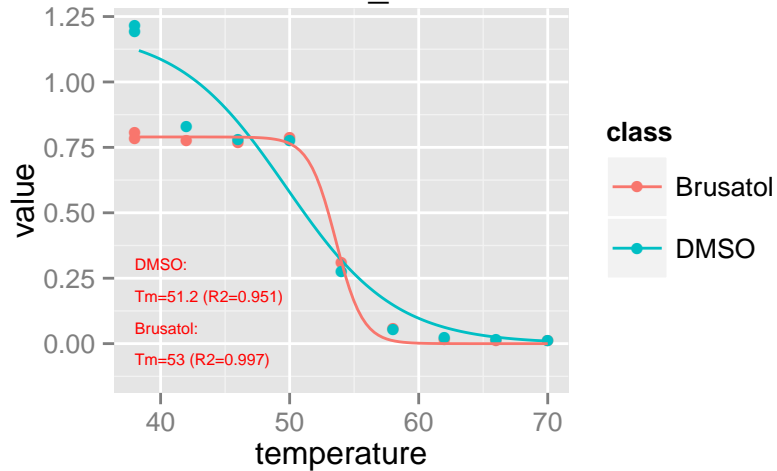

Prot: UB2L3\_HUMAN

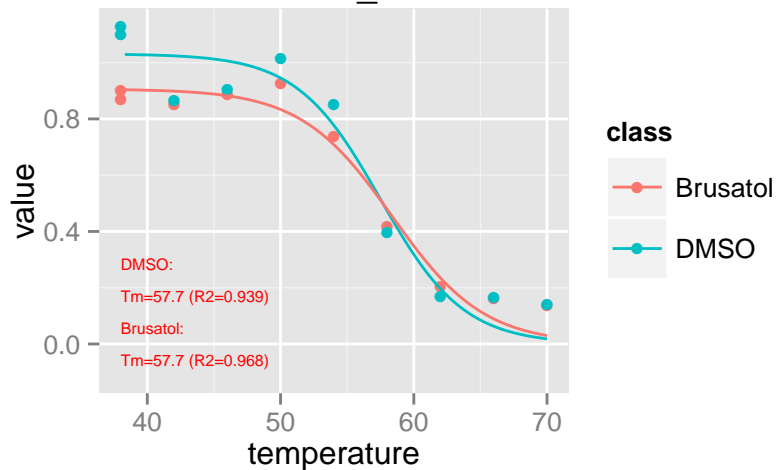

Prot: UB2Q1\_HUMAN

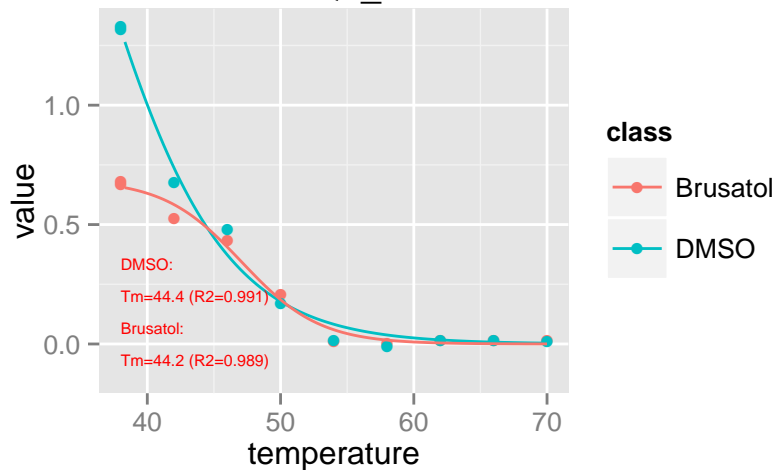

Prot: UB2R1\_HUMAN

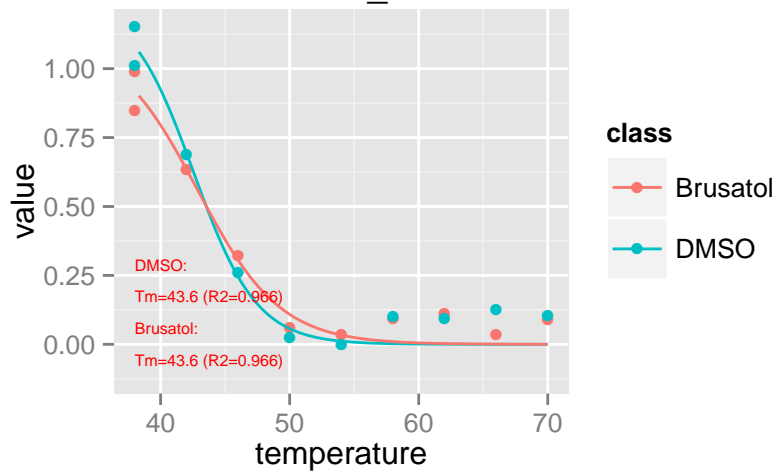

Prot: UB2R2\_HUMAN

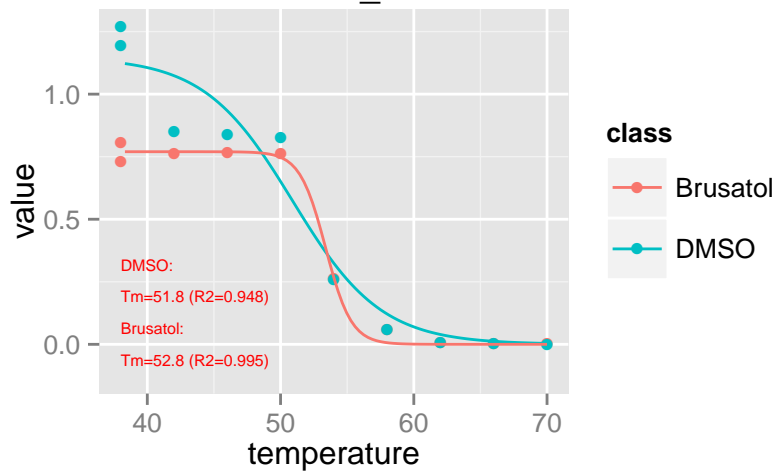

Prot: UB2V1\_HUMAN

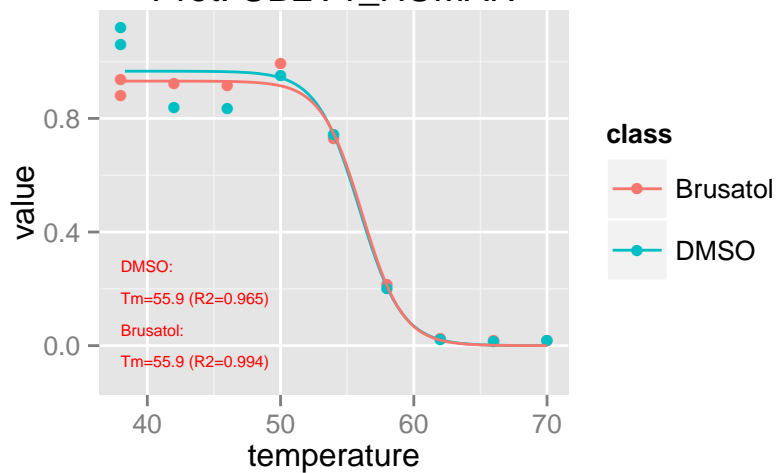

Prot: UB2V2\_HUMAN

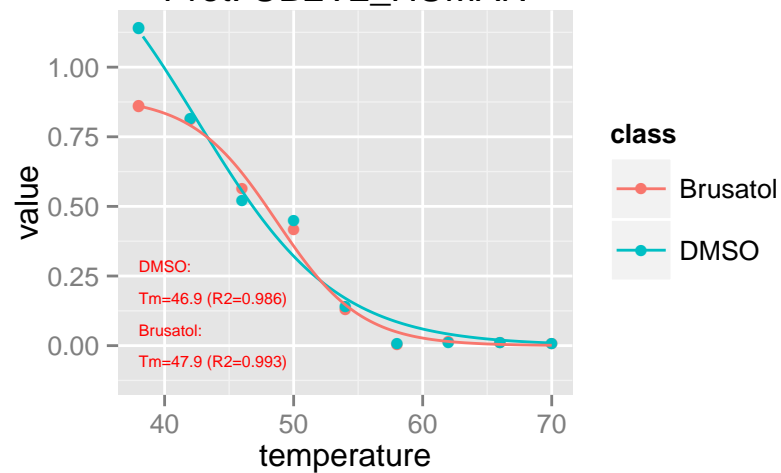

Prot: UBA1\_HUMAN

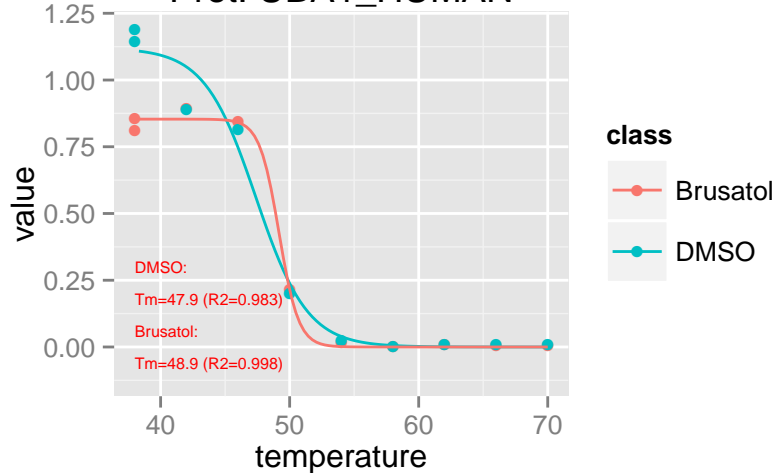

Prot: UBA3\_HUMAN

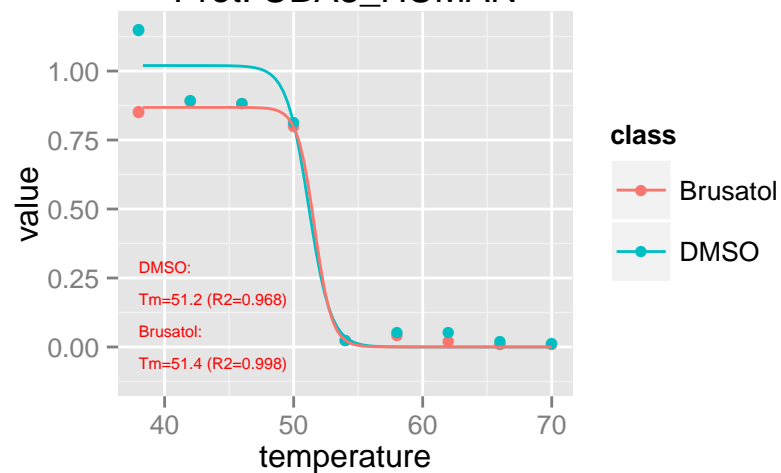

Prot: UBA5\_HUMAN

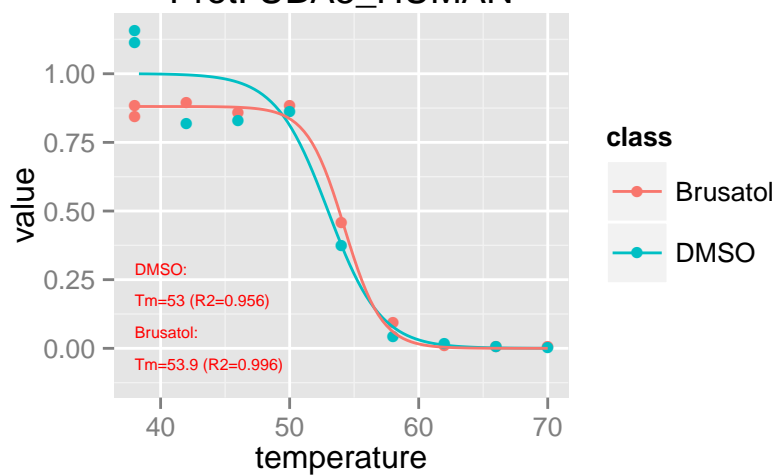

Prot: UBA6\_HUMAN

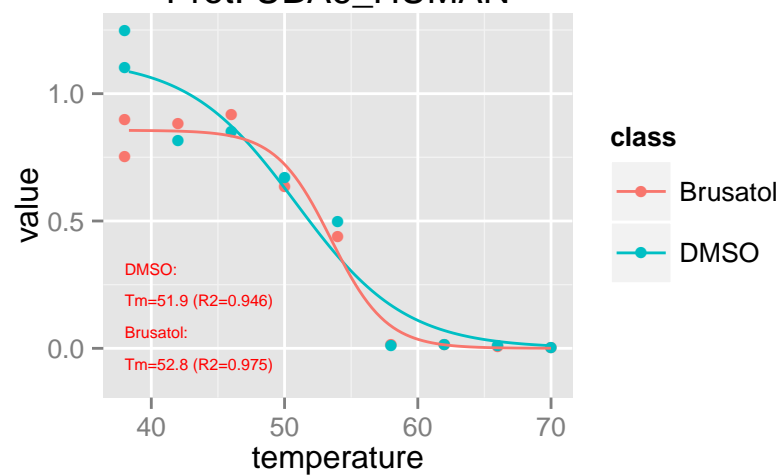

Prot: UBAP1\_HUMAN

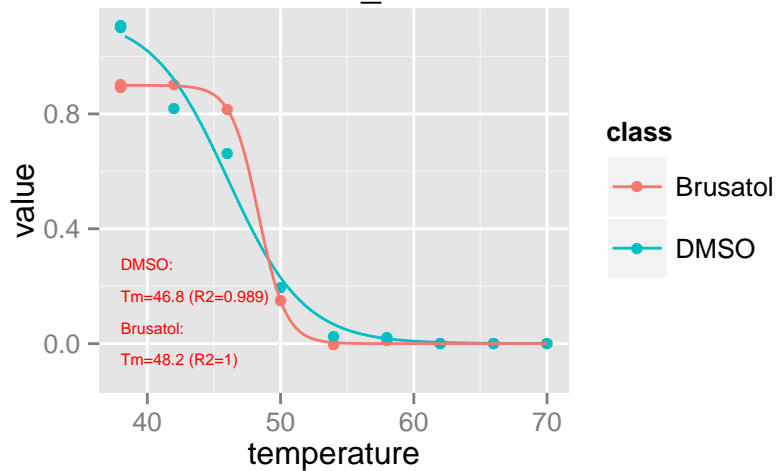

Prot: UBAP2\_HUMAN

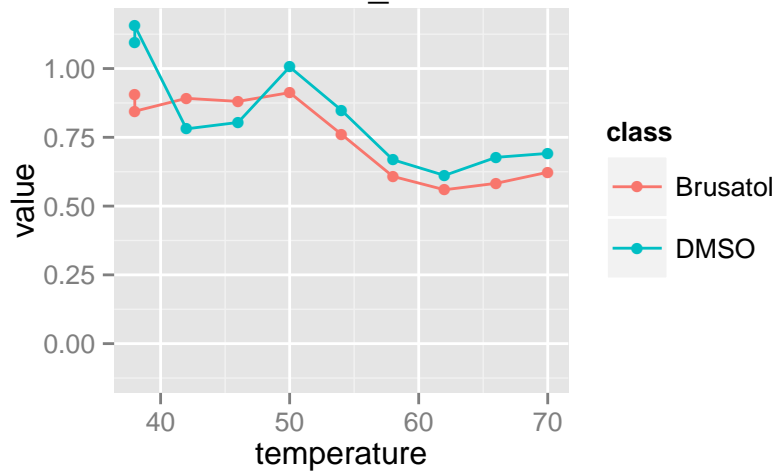

Prot: UBC12\_HUMAN

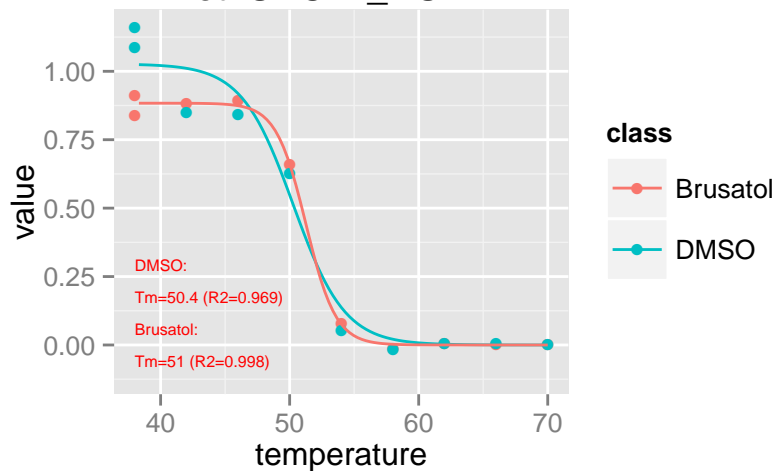

Prot: UBC9\_HUMAN

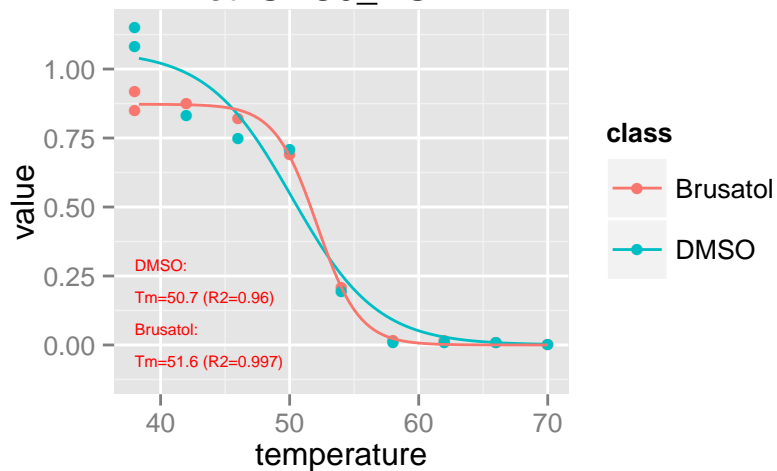

Prot: UBCP1\_HUMAN

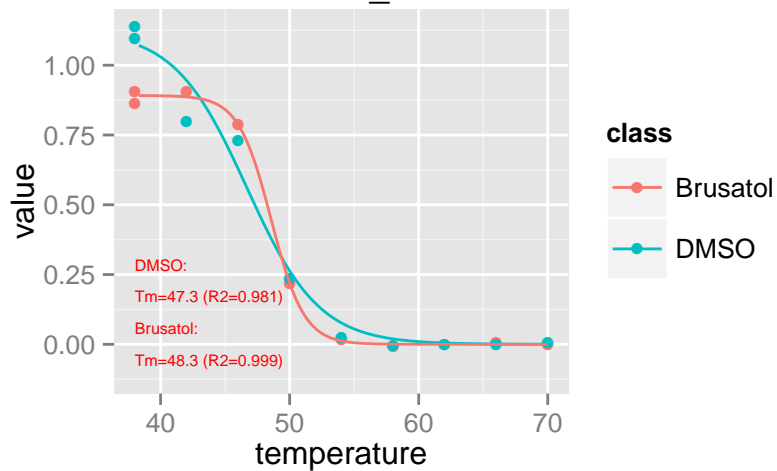

Prot: UBE2A\_HUMAN

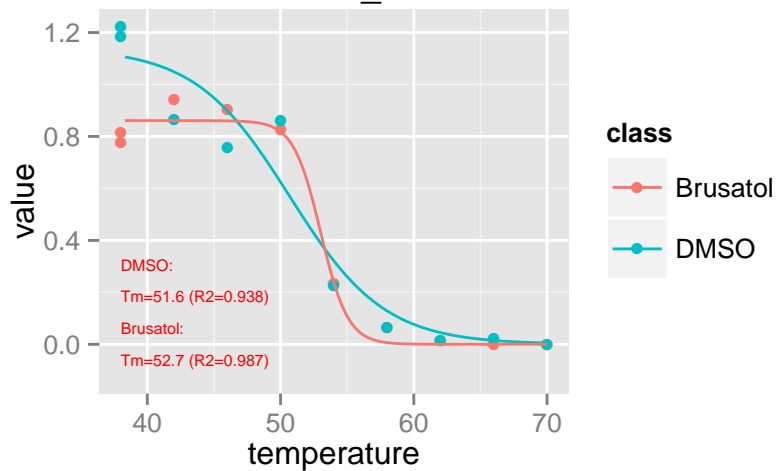

Prot: UBE2C\_HUMAN

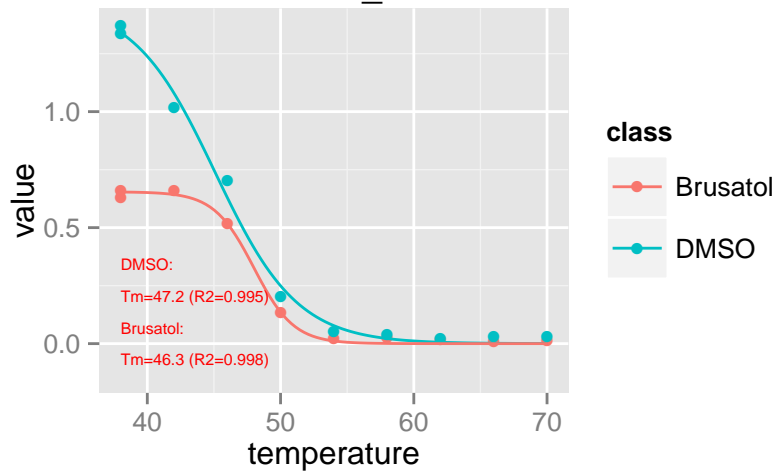

Prot: UBE2F\_HUMAN

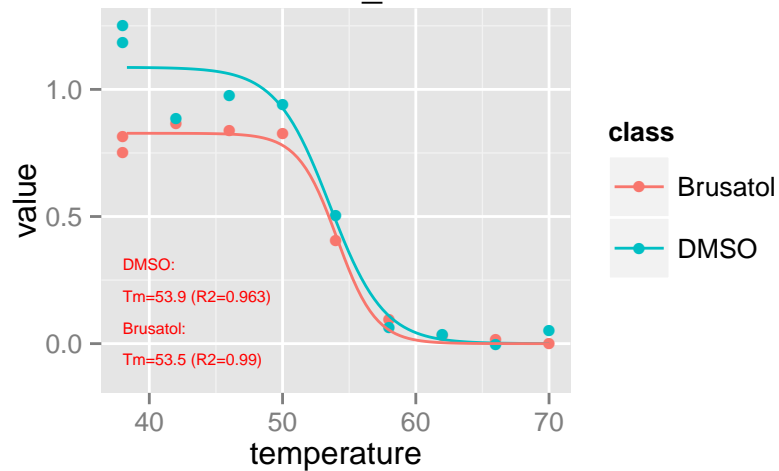

Prot: UBE2H\_HUMAN

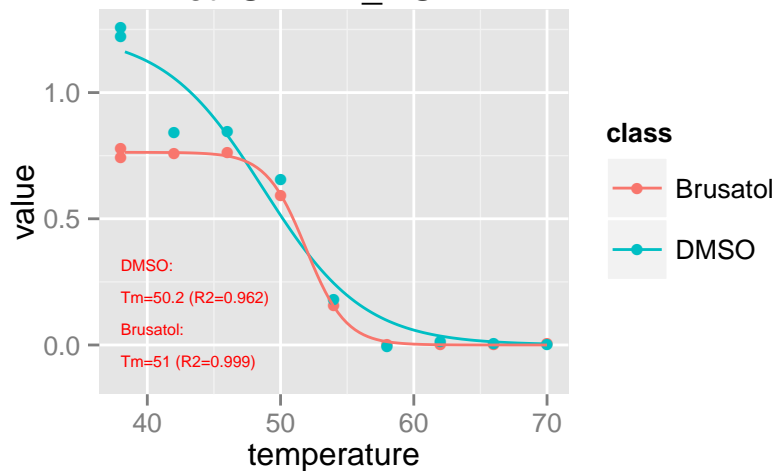

Prot: UBE2K\_HUMAN

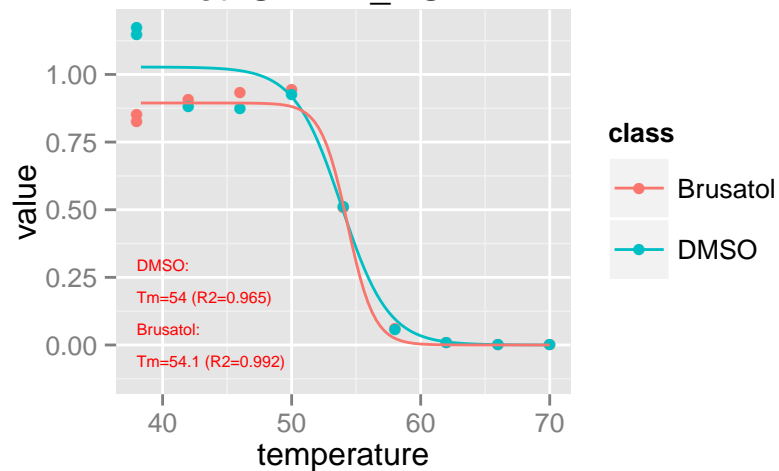

Prot: UBE2N\_HUMAN

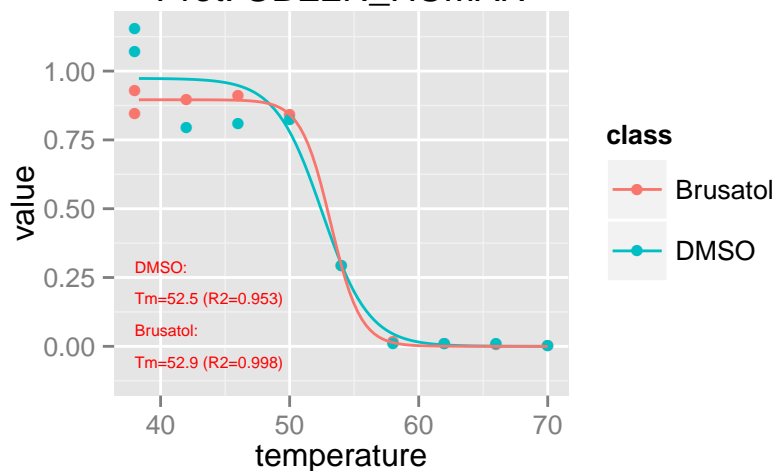

Prot: UBE2O\_HUMAN

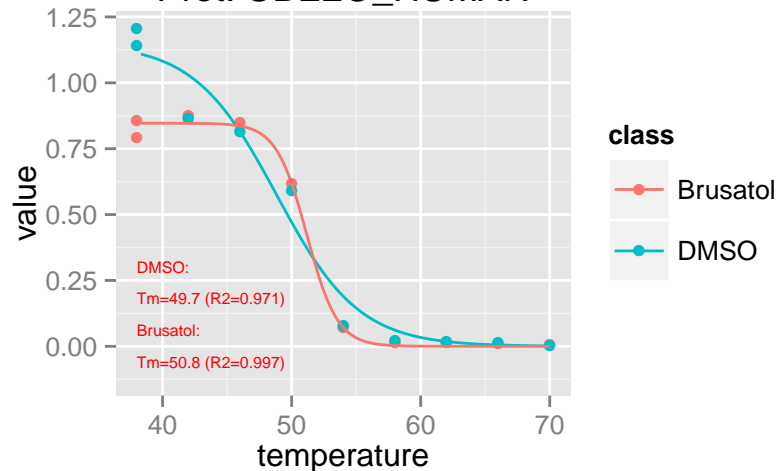

Prot: UBE2S\_HUMAN

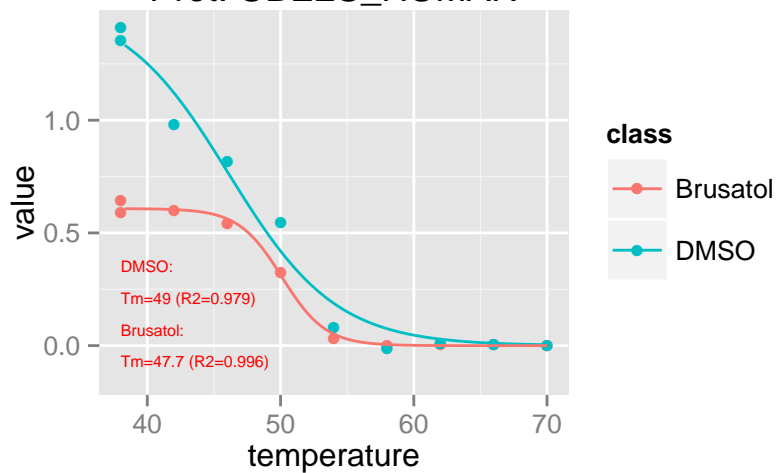

Prot: UBE2Z\_HUMAN

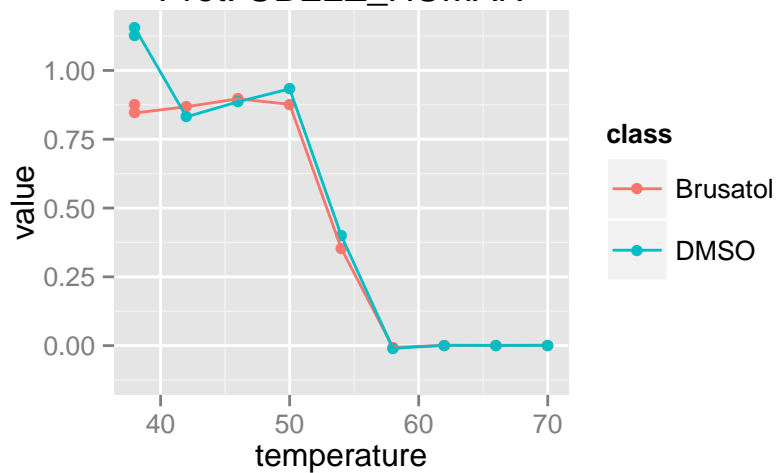

Prot: UBE3A\_HUMAN

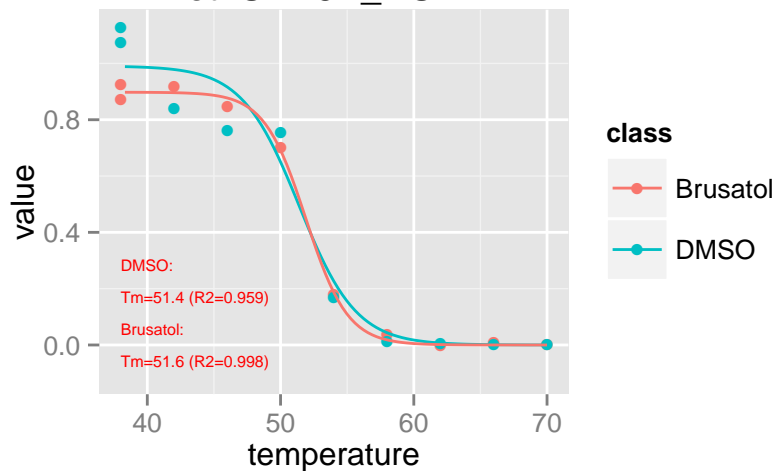

Prot: UBE3C\_HUMAN

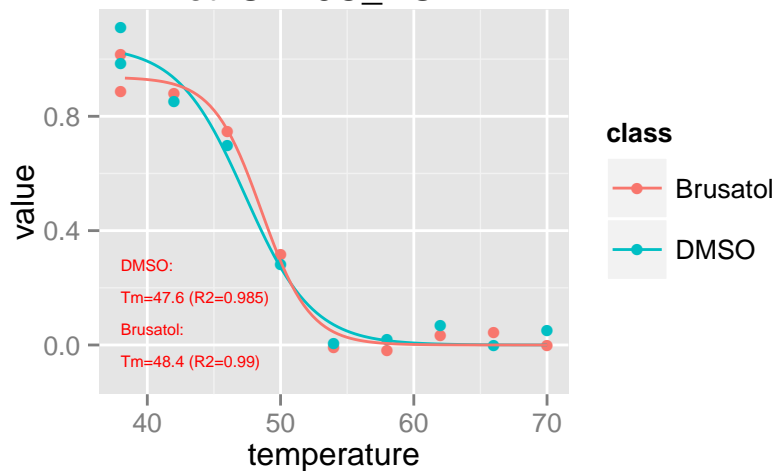

Prot: UBE4B\_HUMAN

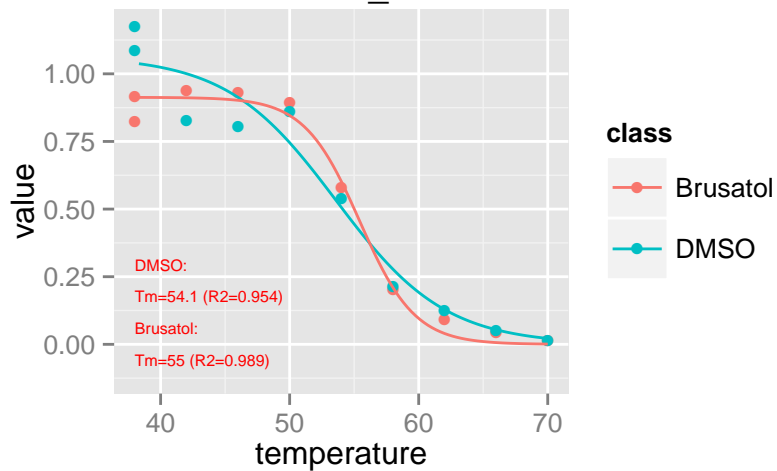

Prot: UBF1\_HUMAN

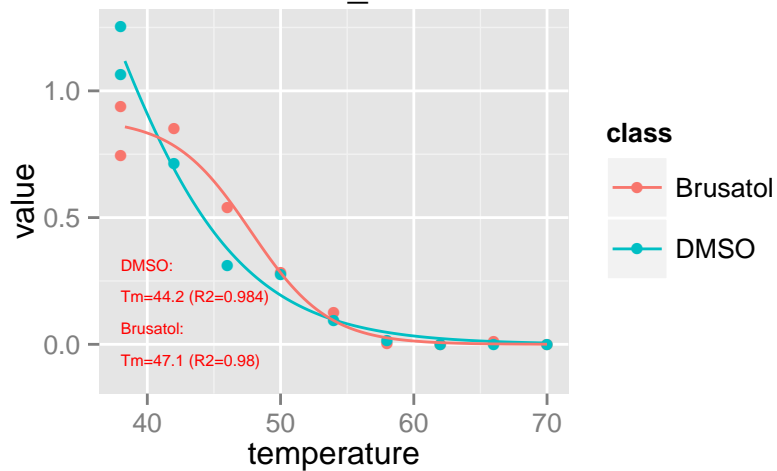



Prot: UBFD1\_HUMAN

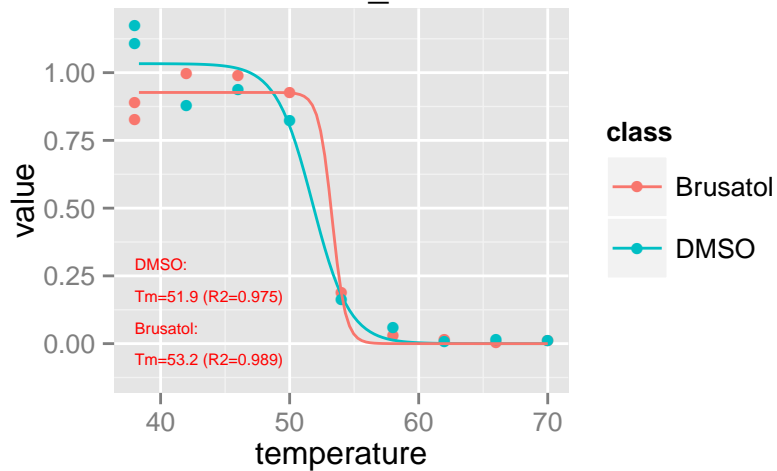

Prot: UBL4A\_HUMAN

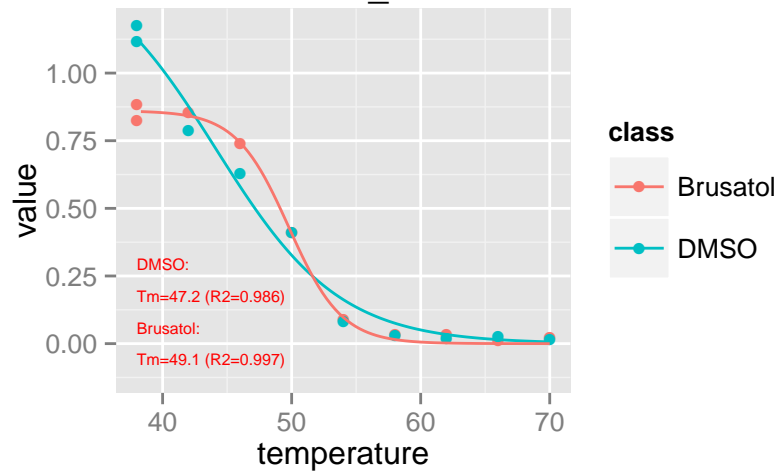

Prot: UBL5\_HUMAN

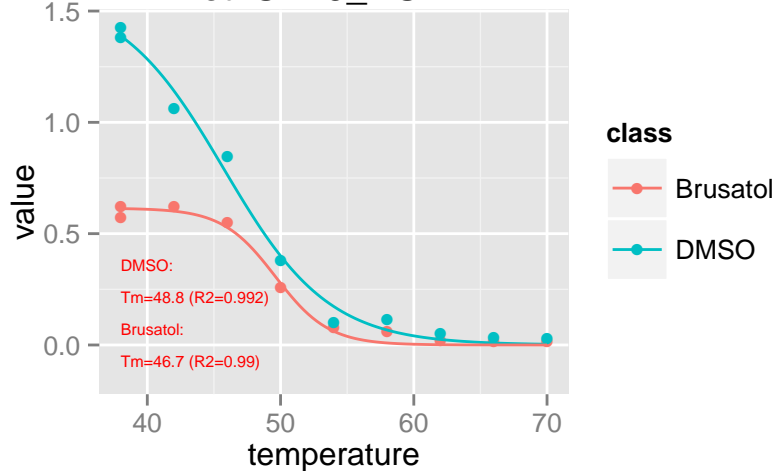

Prot: UBP10\_HUMAN

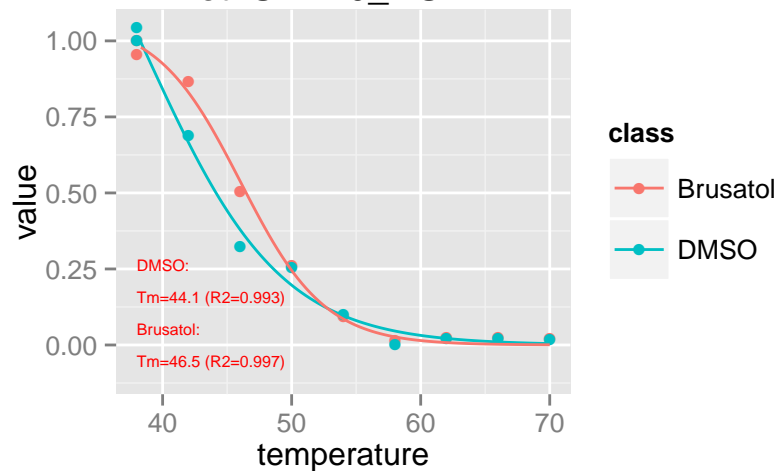

Prot: UBP11\_HUMAN

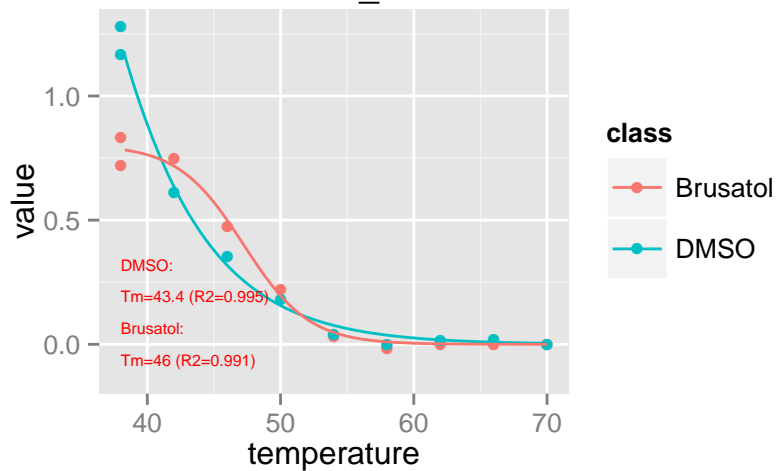

Prot: UBP13\_HUMAN

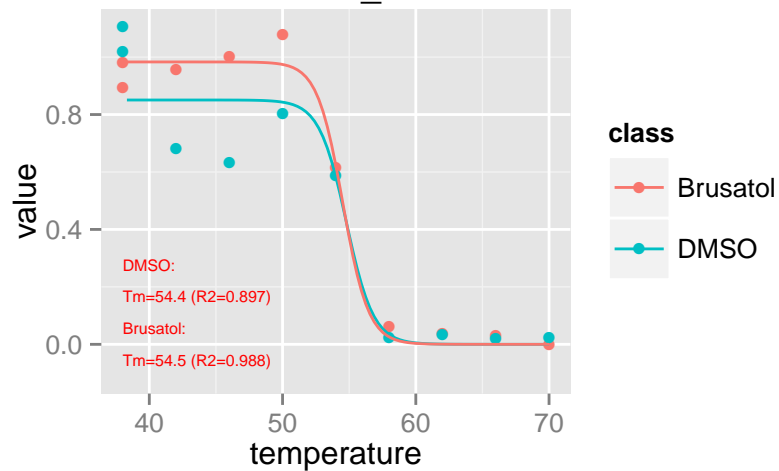

Prot: UBP14\_HUMAN

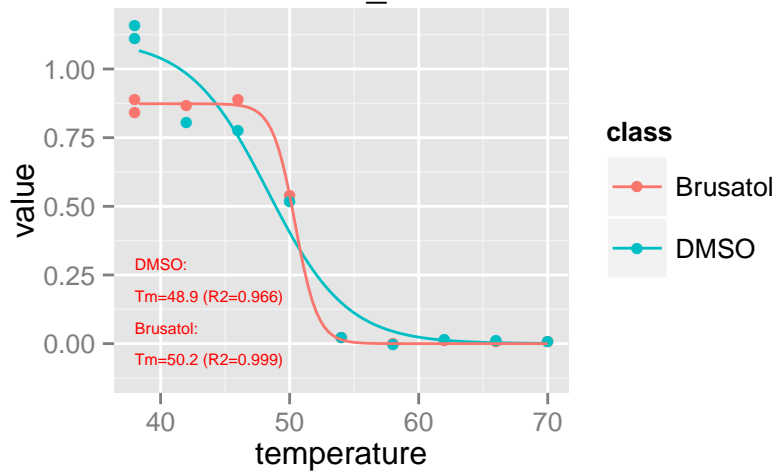

Prot: UBP15\_HUMAN

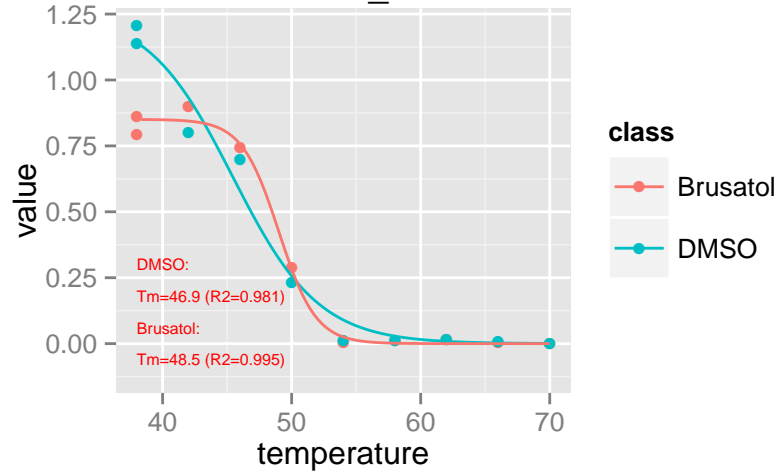

Prot: UBP16\_HUMAN

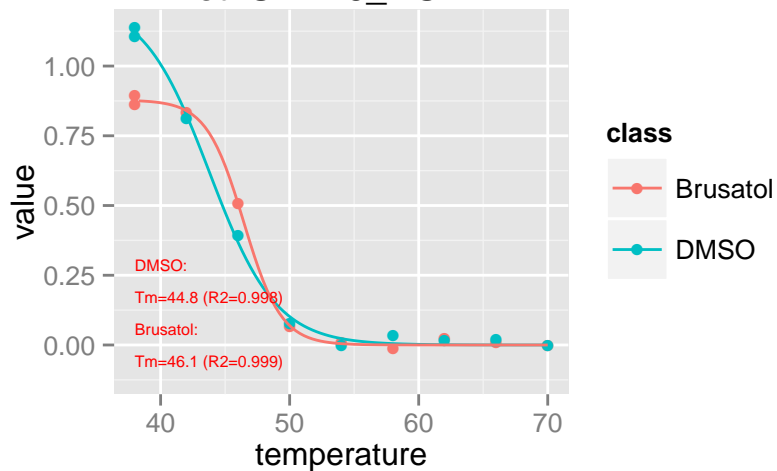

Prot: UBP19\_HUMAN

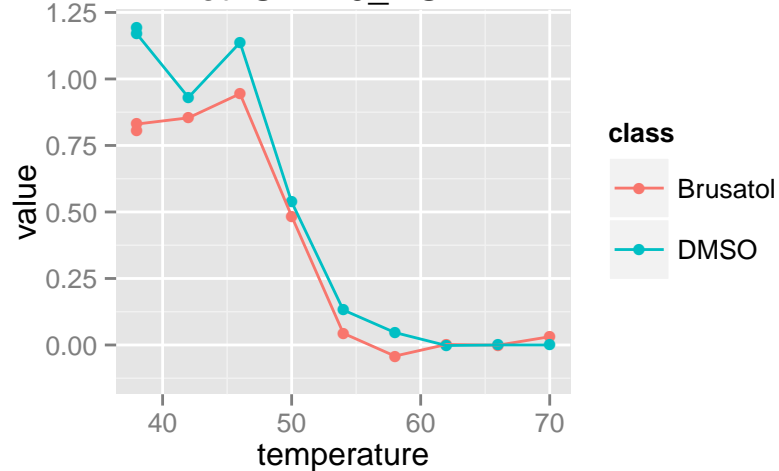

Prot: UBP24\_HUMAN

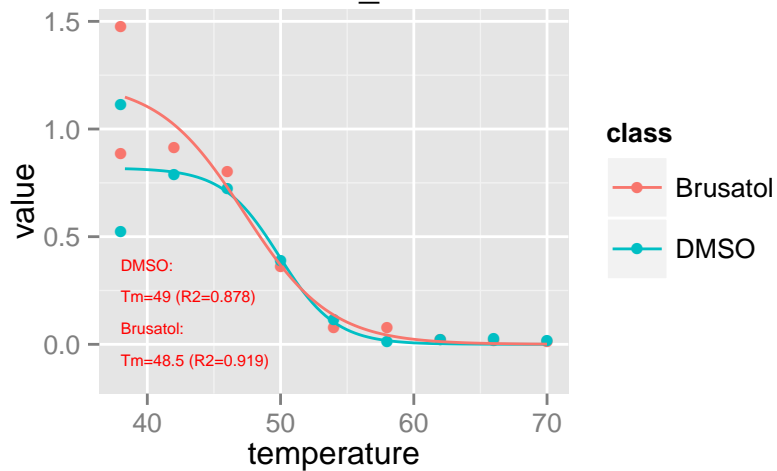

Prot: UBP2L\_HUMAN

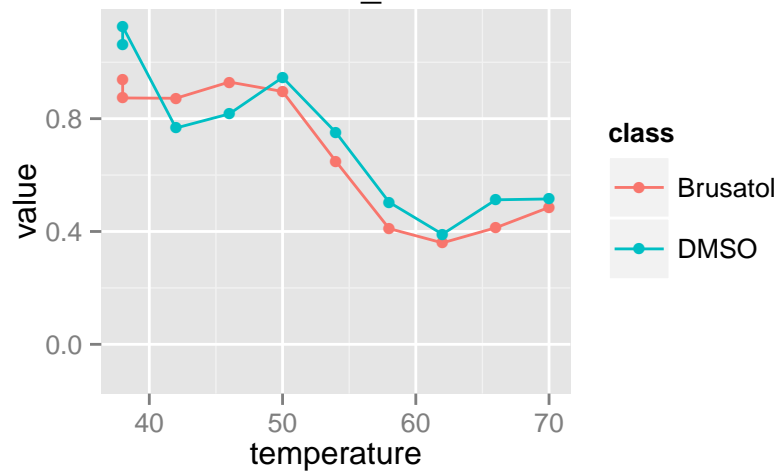

Prot: UBP3\_HUMAN

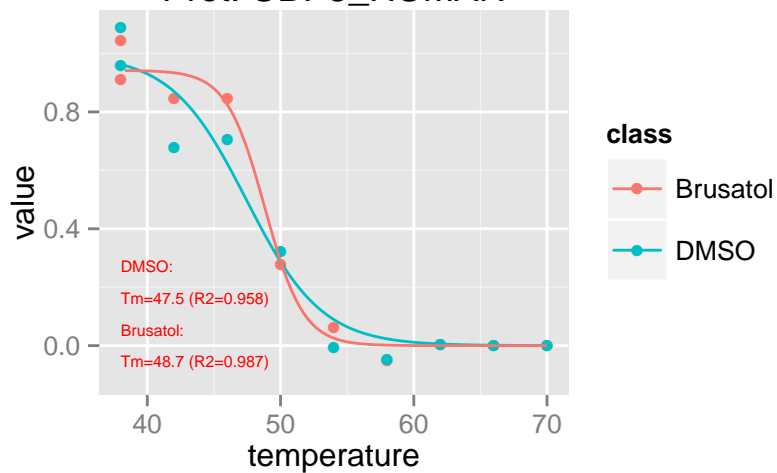

Prot: UBP34\_HUMAN

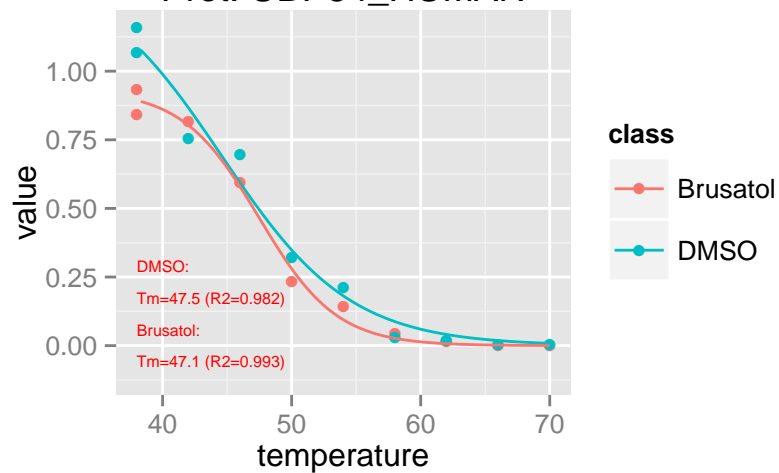

Prot: UBP47\_HUMAN

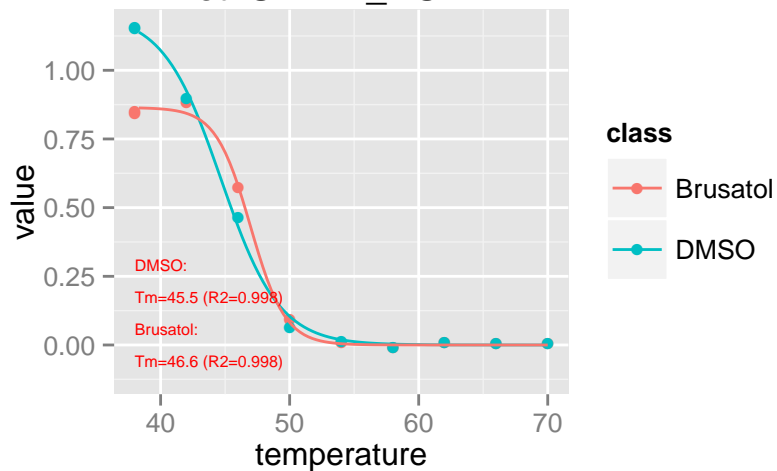

Prot: UBP5\_HUMAN

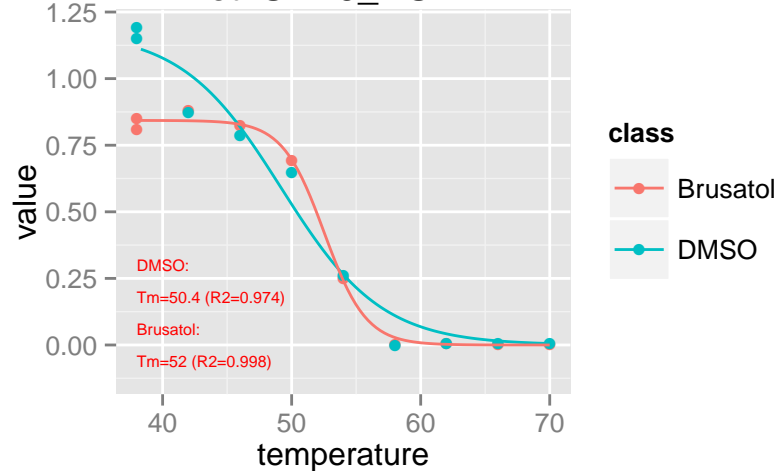

Prot: UBP7\_HUMAN

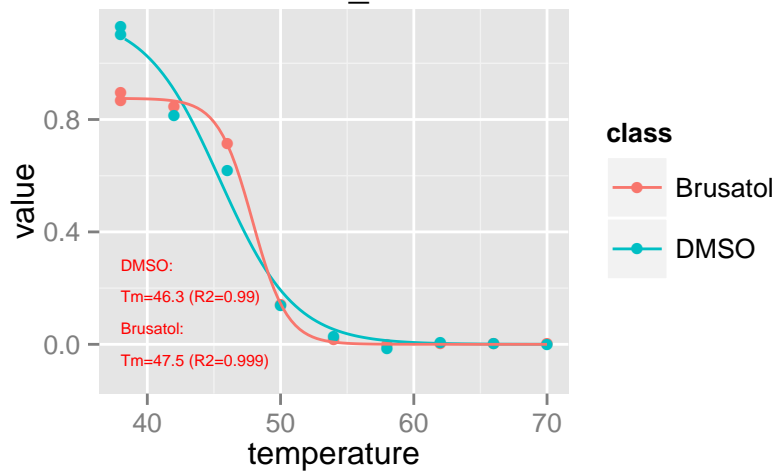

Prot: UBP8\_HUMAN

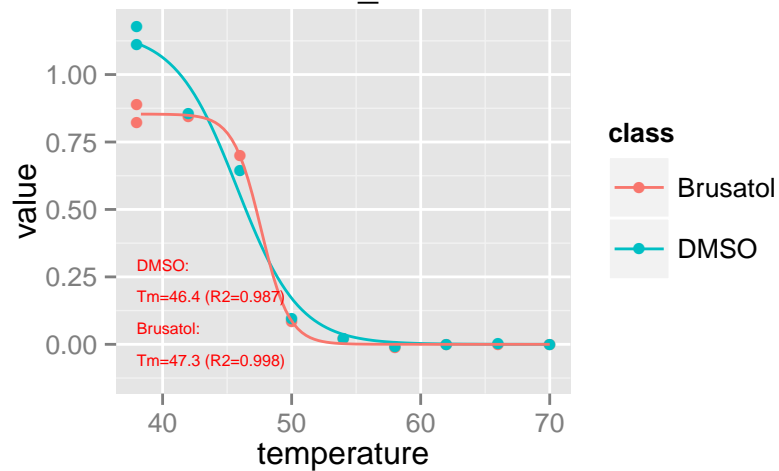

Prot: UBQL1\_HUMAN

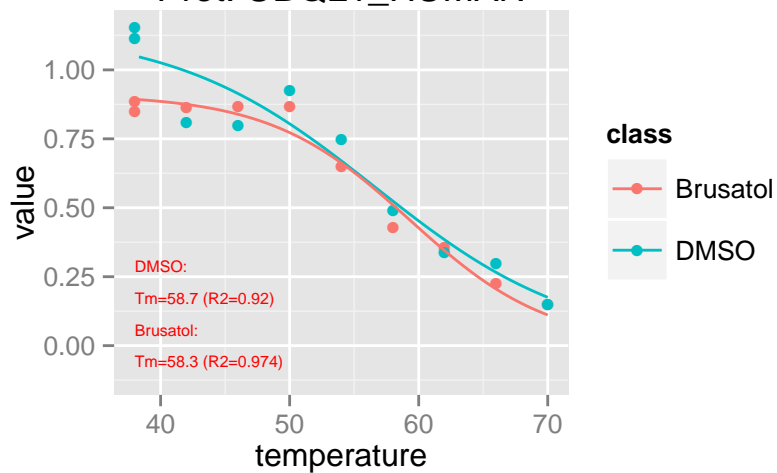

Prot: UBQL2\_HUMAN

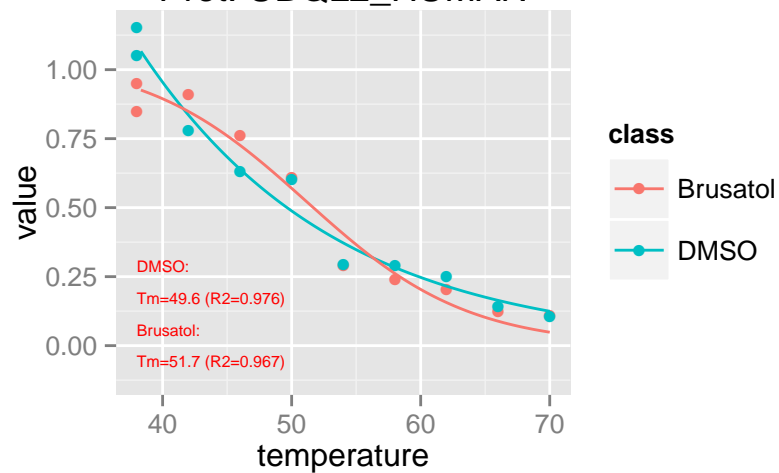

Prot: UBQL4\_HUMAN

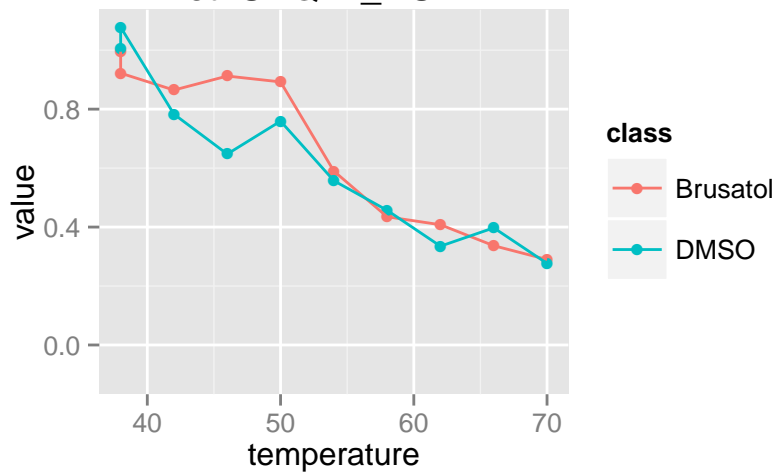

Prot: UBR3\_HUMAN

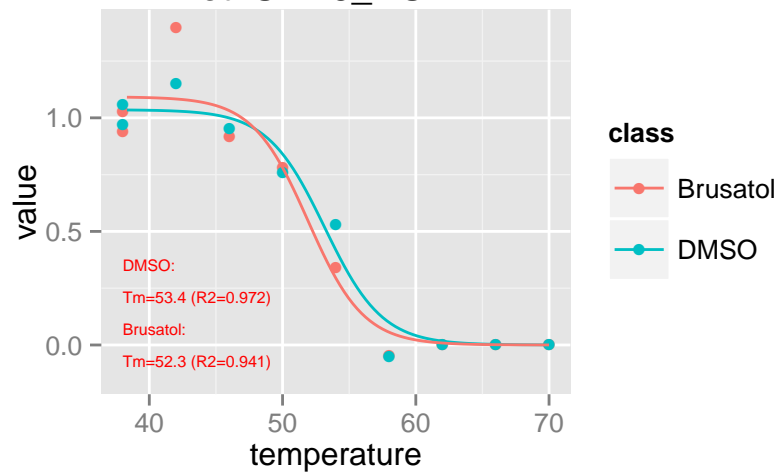

Prot: UBR4\_HUMAN

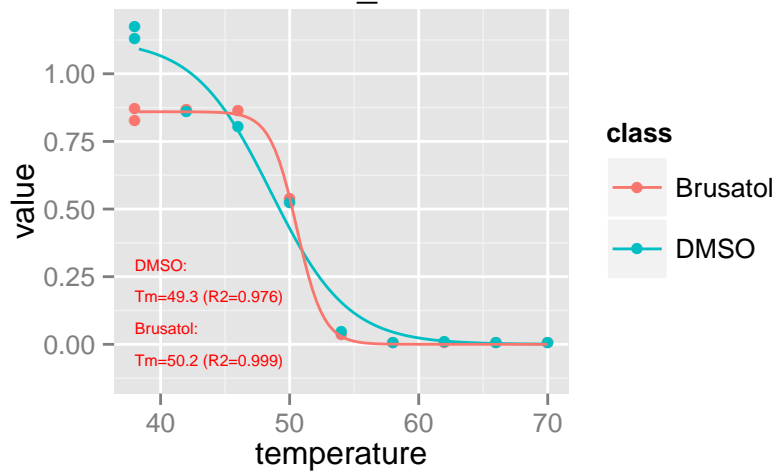

Prot: UBR5\_HUMAN

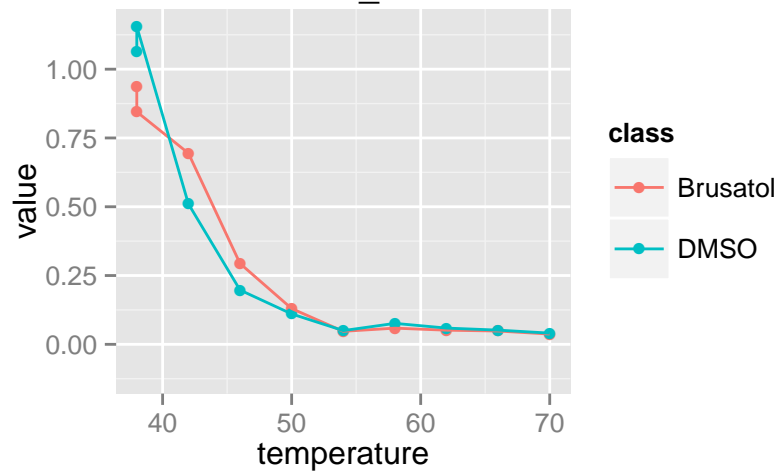

Prot: UBR7\_HUMAN

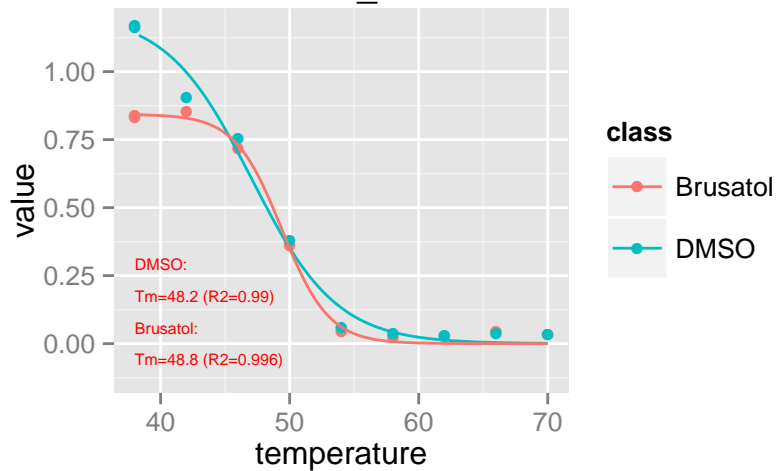

Prot: UBS3B\_HUMAN

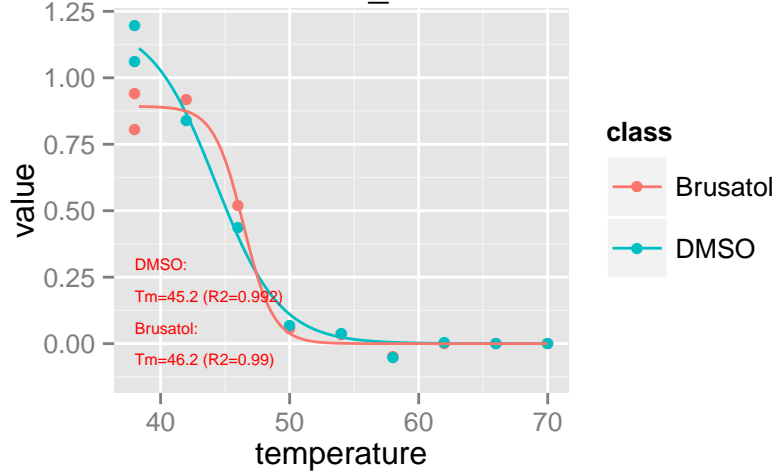

Prot: UBXN1\_HUMAN

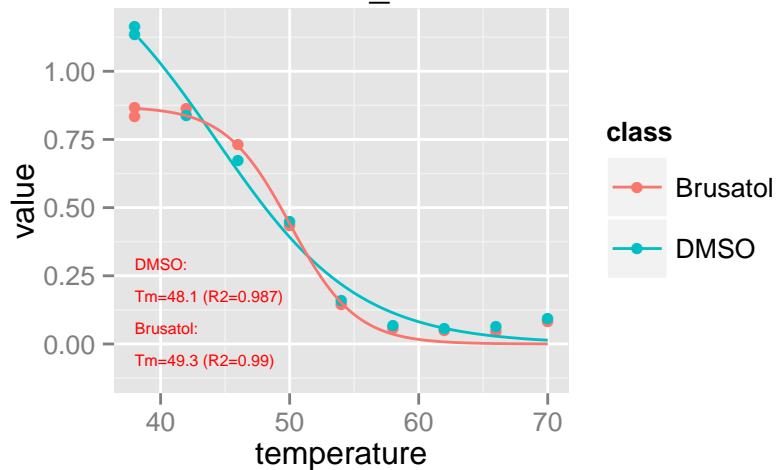

Prot: UBXN7\_HUMAN

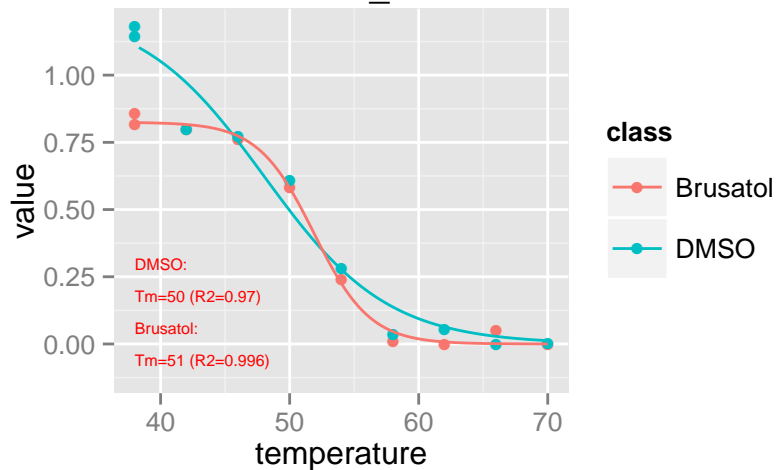

Prot: UCHL1\_HUMAN

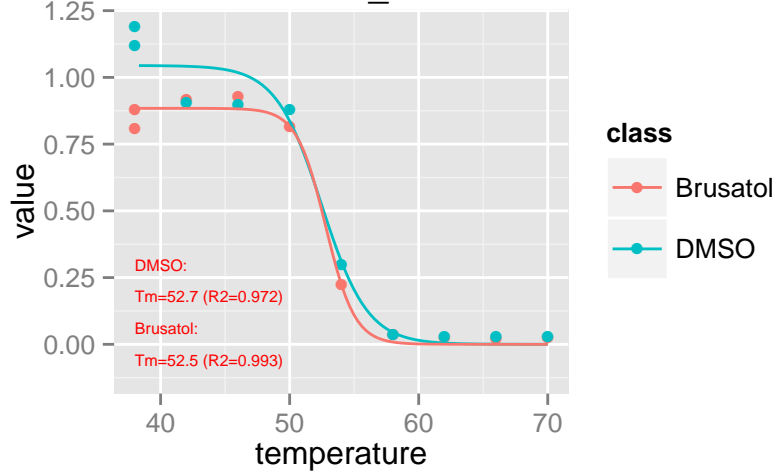

Prot: UCHL3\_HUMAN

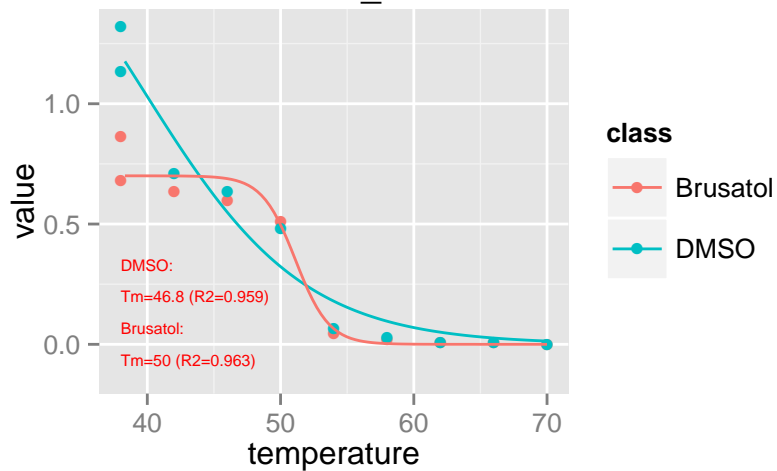

Prot: UCHL5\_HUMAN

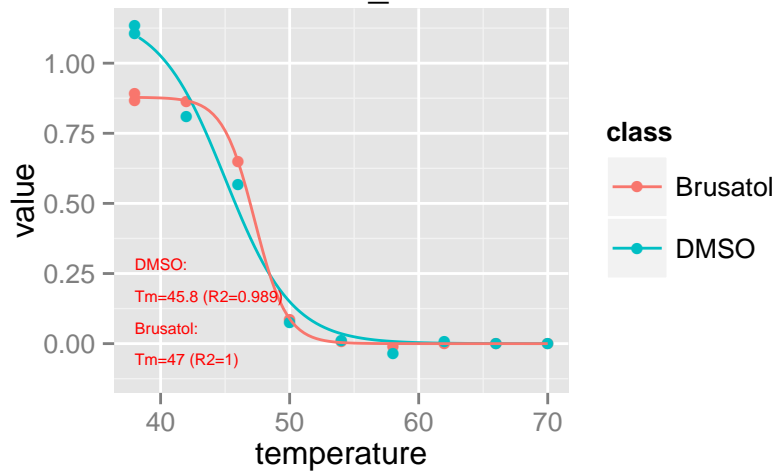

Prot: UCK2\_HUMAN

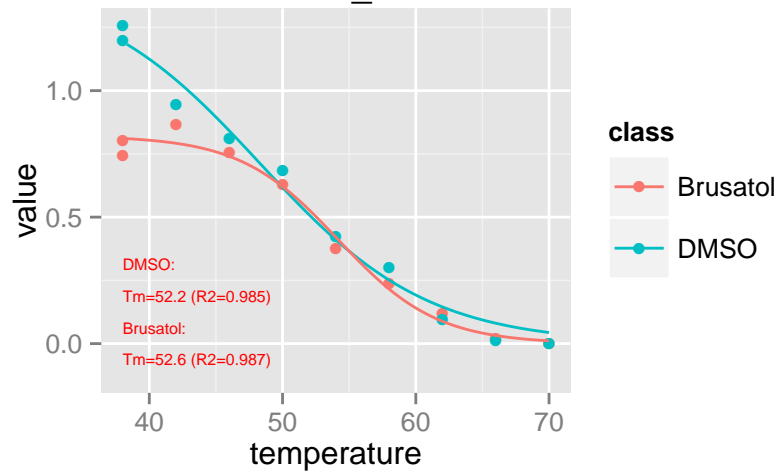

Prot: UCRIL\_HUMAN

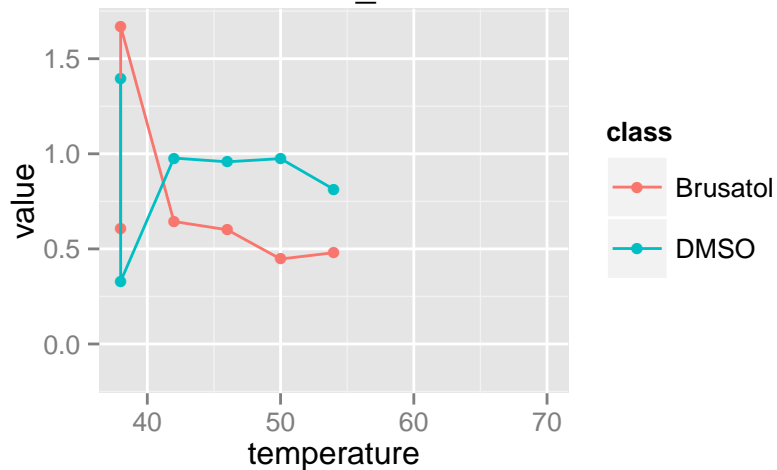

Prot: UEVLD\_HUMAN

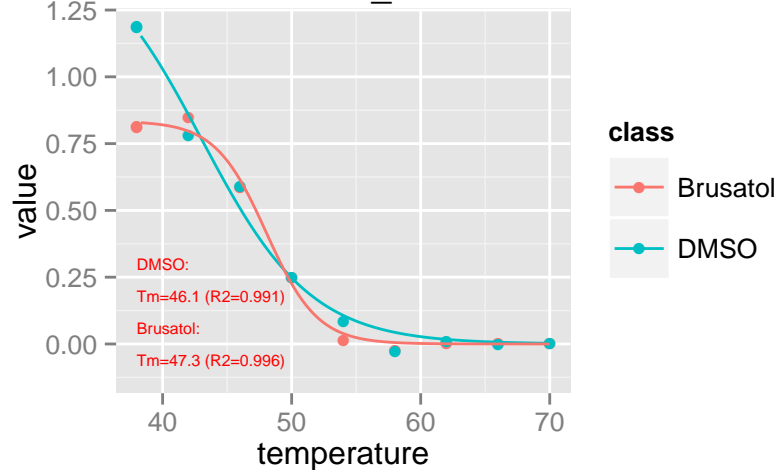

Prot: UFC1\_HUMAN

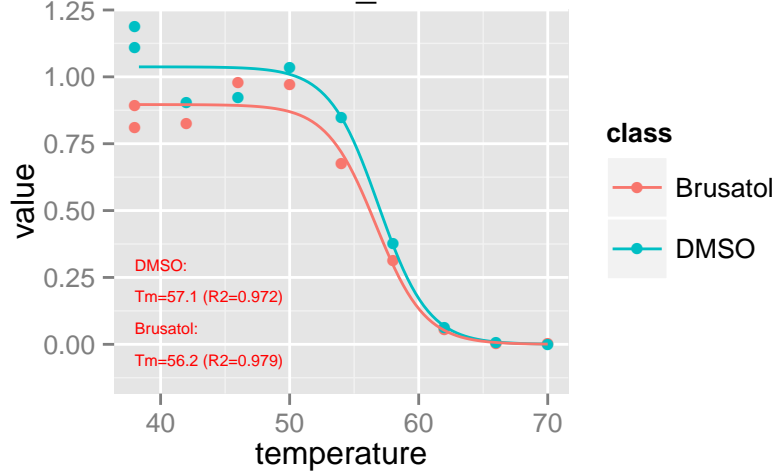

Prot: UFD1\_HUMAN

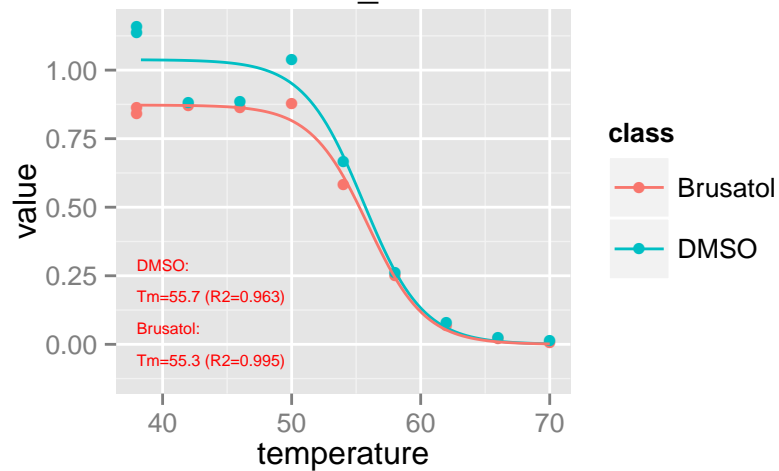

Prot: UFM1\_HUMAN

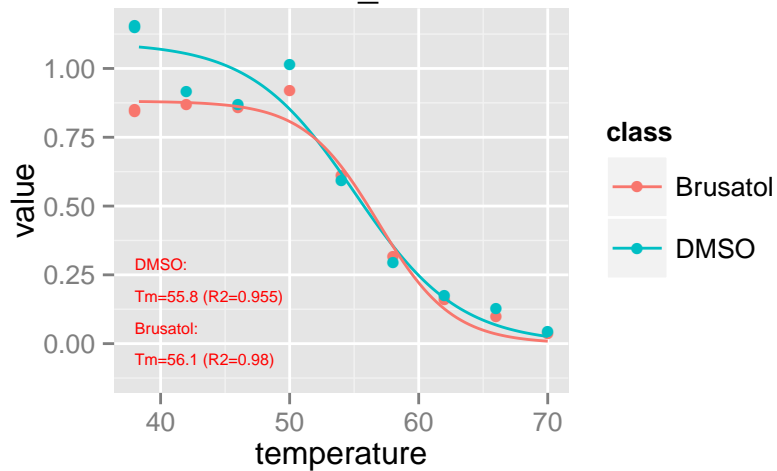

Prot: UGDH\_HUMAN

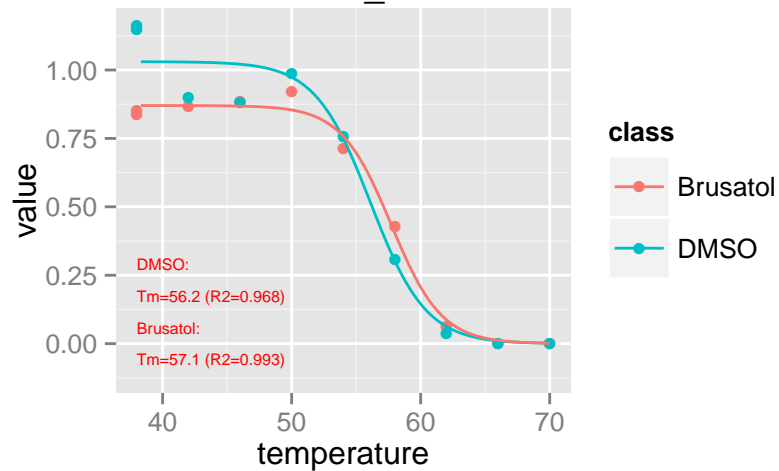

Prot: UGGG1\_HUMAN

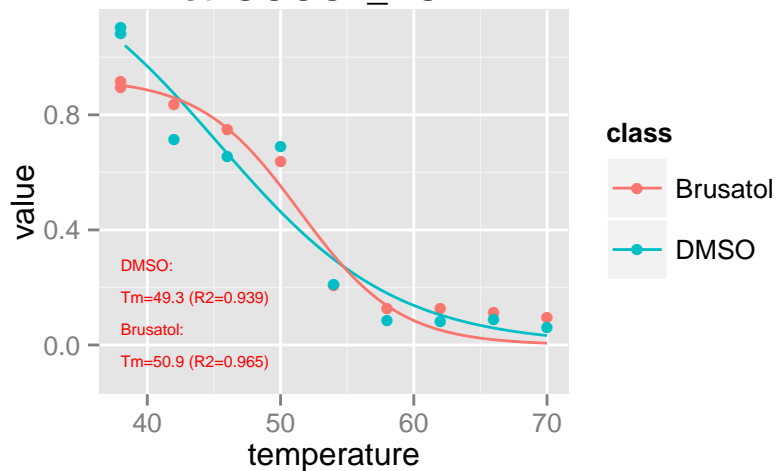

Prot: UGPA\_HUMAN

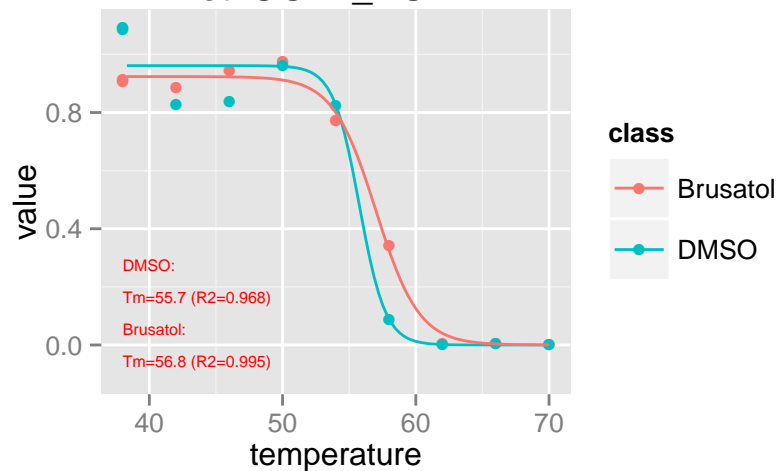

Prot: UK114\_HUMAN

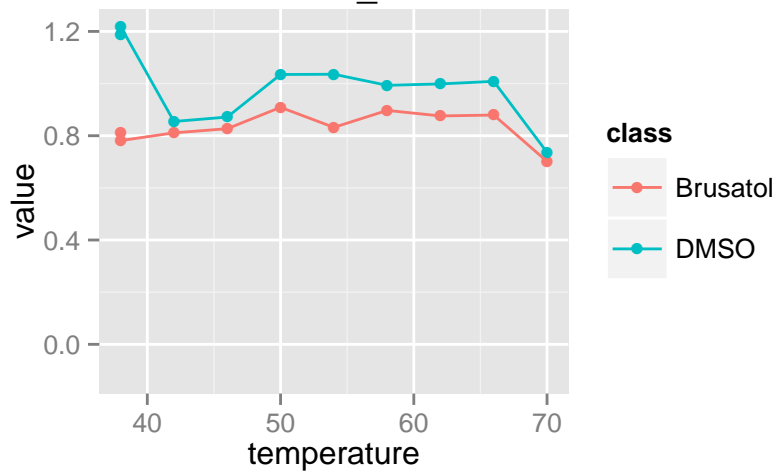

Prot: ULA1\_HUMAN

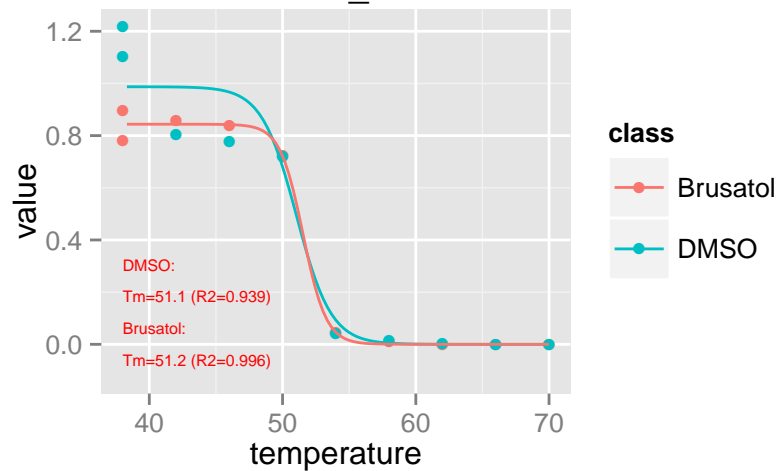

Prot: UMPS\_HUMAN

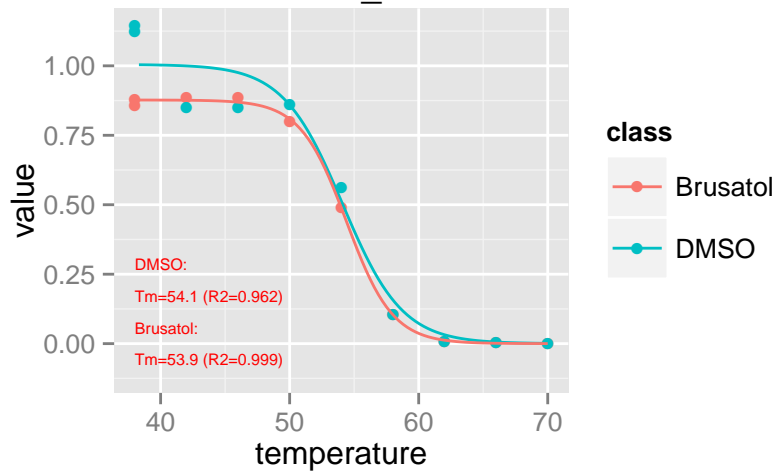

Prot: UN45A\_HUMAN

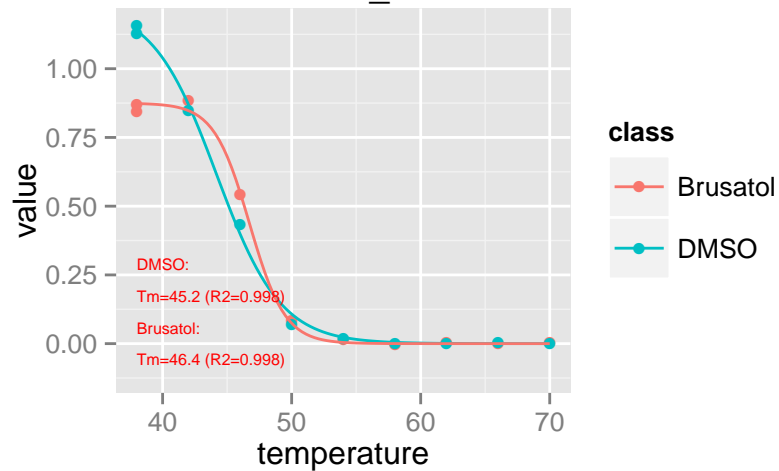

Prot: UPP1\_HUMAN

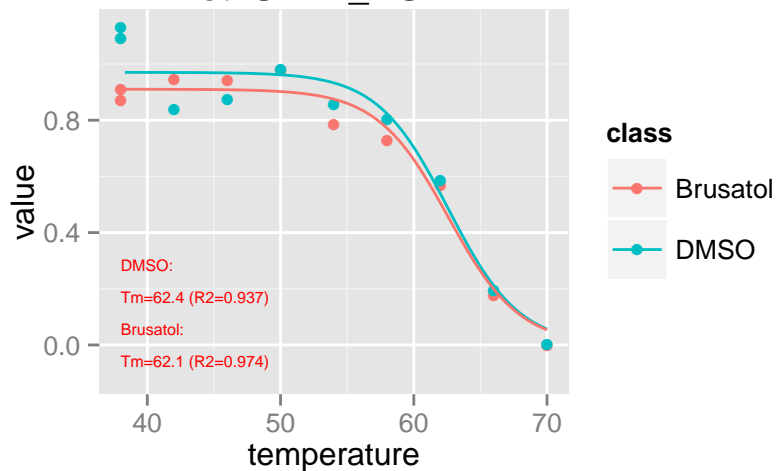

Prot: USO1\_HUMAN

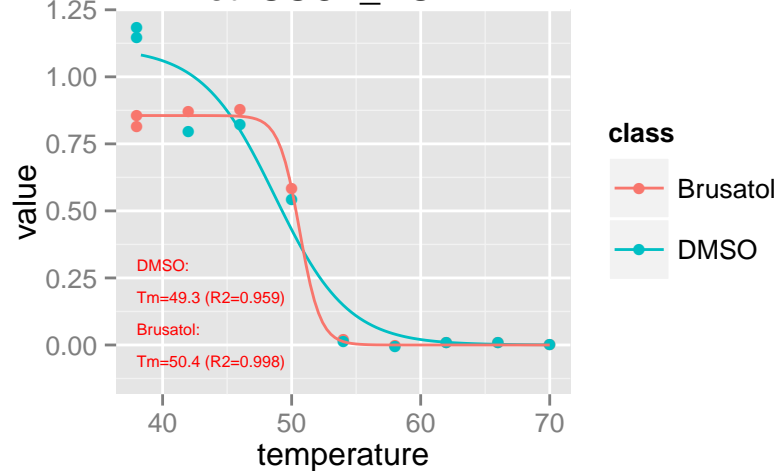

Prot: USP9X\_HUMAN

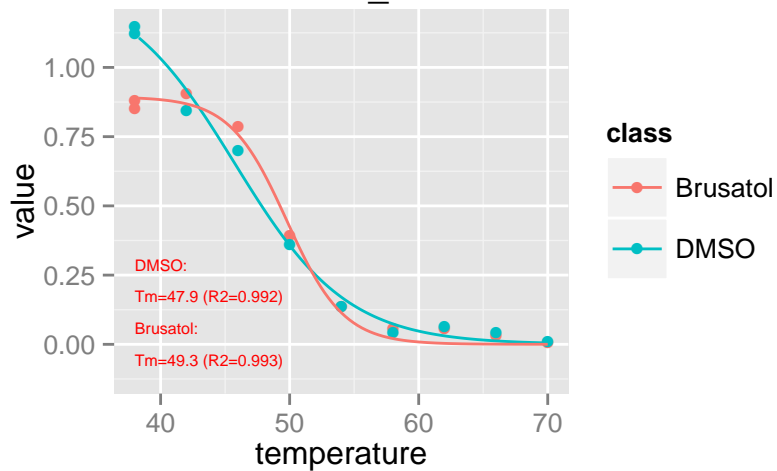

Prot: UT14A\_HUMAN

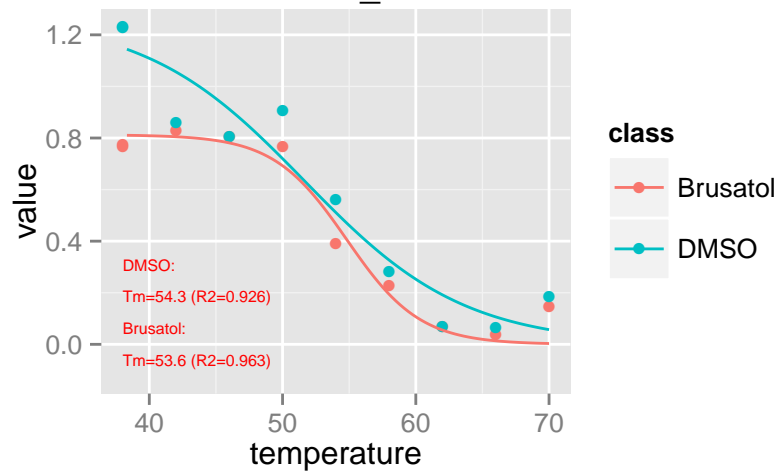



Prot: UTRO\_HUMAN

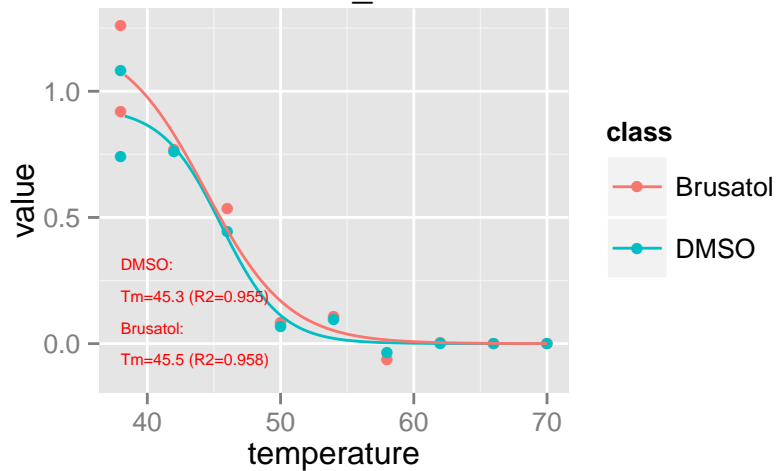

Prot: UXT\_HUMAN

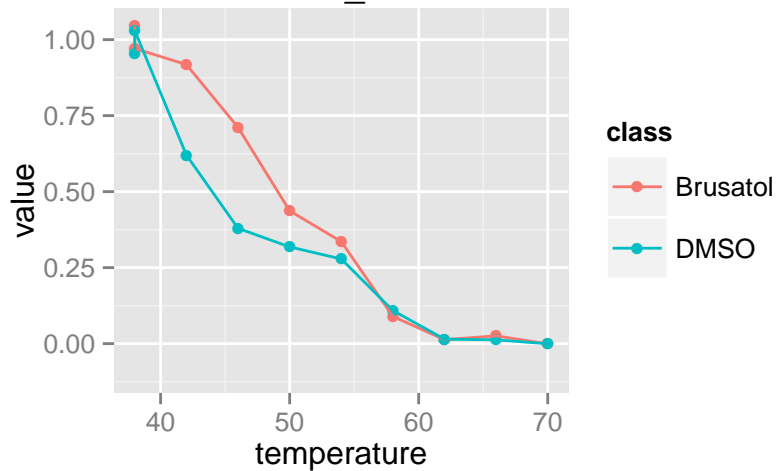

Prot: VA0D1\_HUMAN

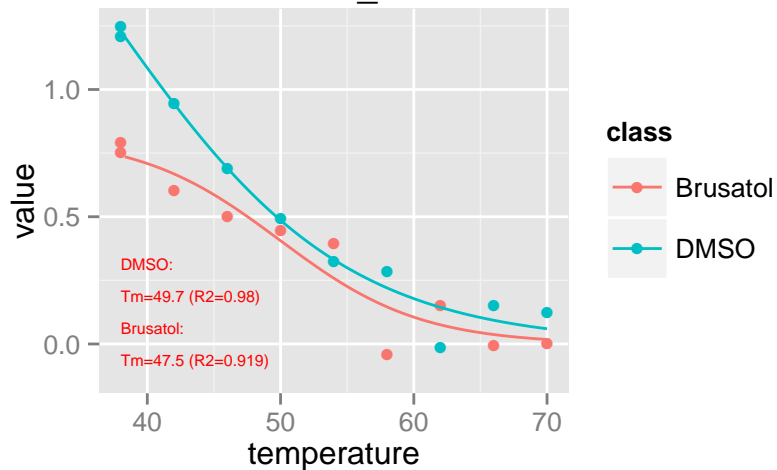

Prot: VAC14\_HUMAN

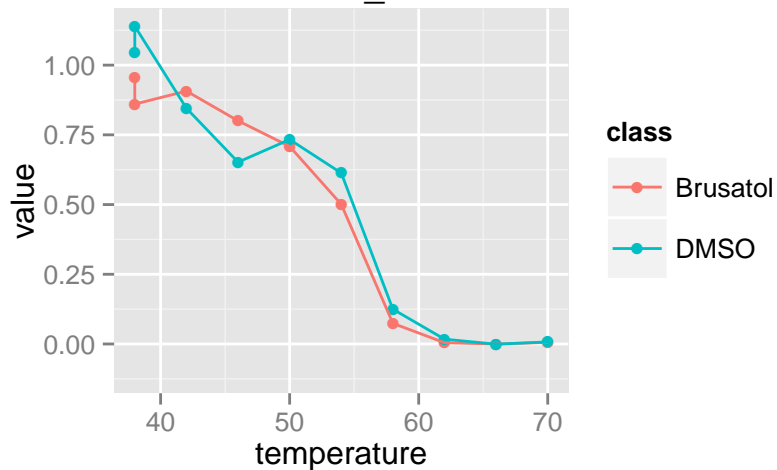

Prot: VAPA\_HUMAN

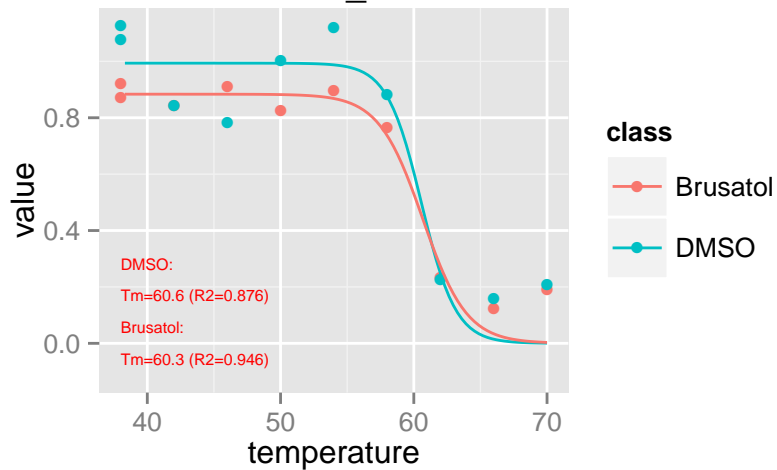

Prot: VAPB\_HUMAN

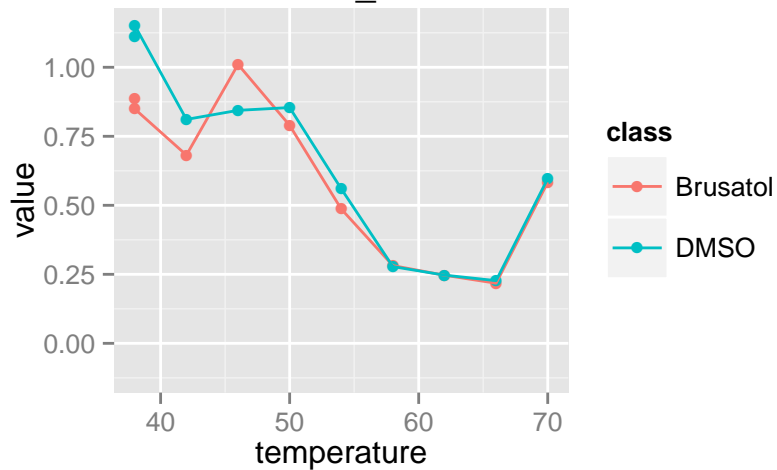

Prot: VASP\_HUMAN

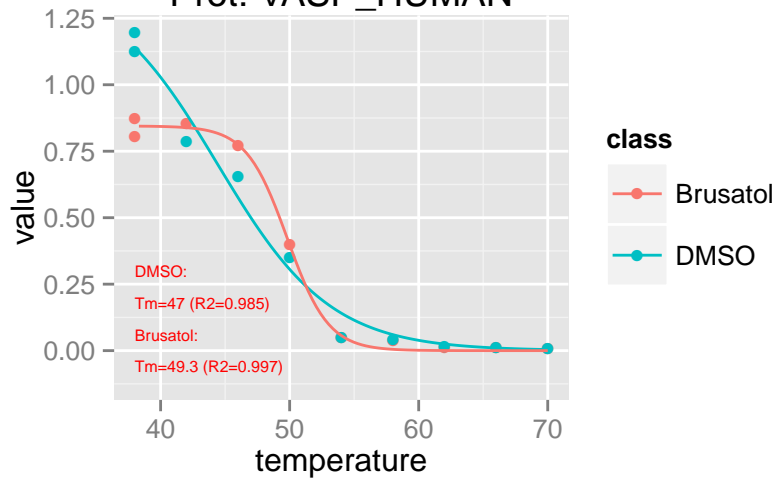

Prot: VAT1\_HUMAN

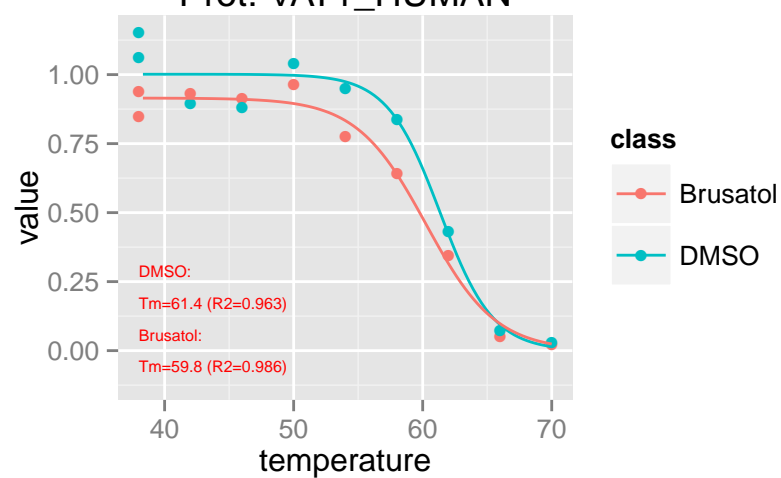

Prot: VATA\_HUMAN

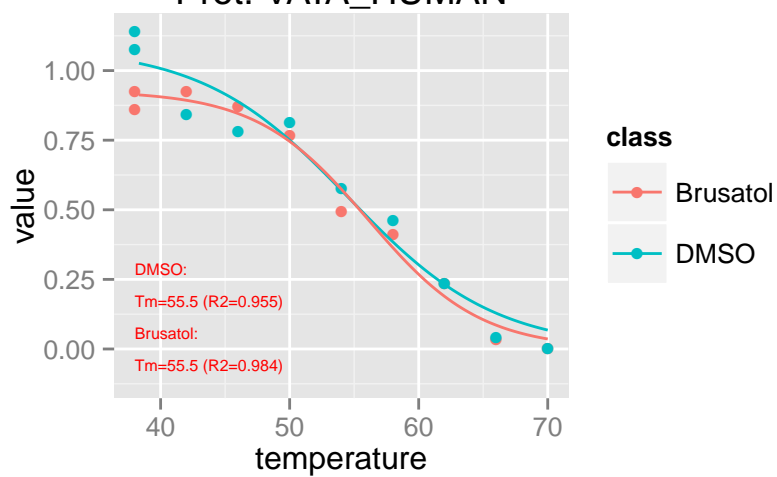

Prot: VATB1\_HUMAN

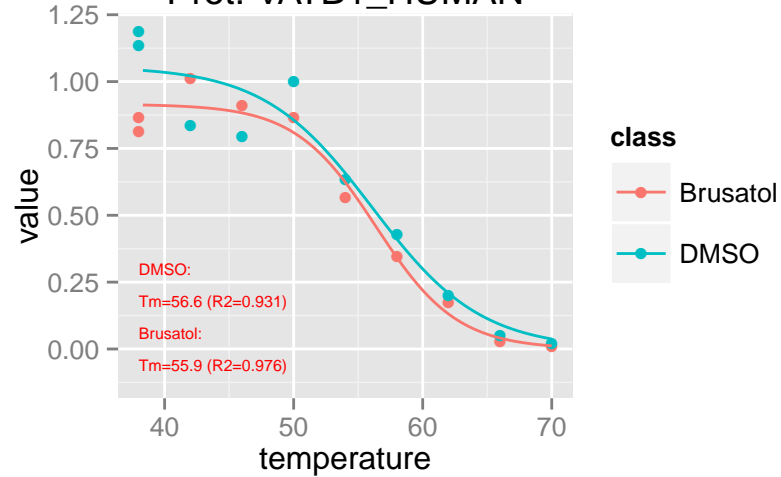

Prot: VATB2\_HUMAN

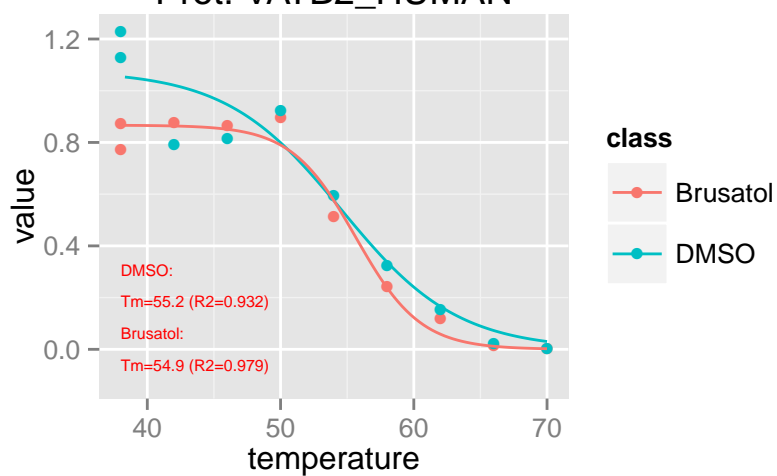

Prot: VATC1\_HUMAN

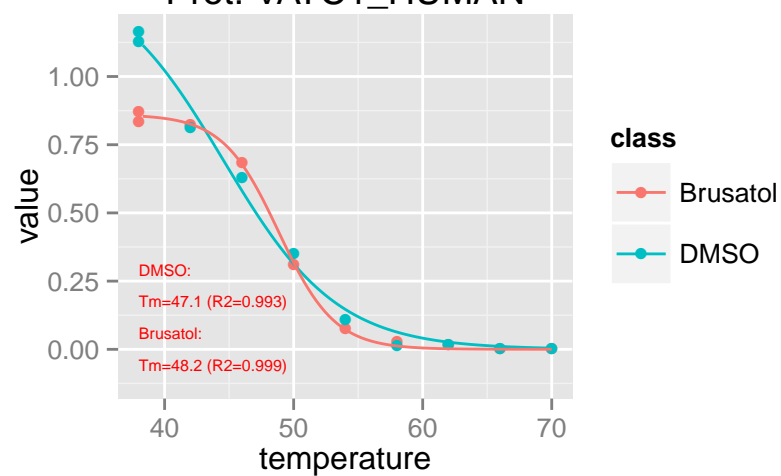

Prot: VATD\_HUMAN

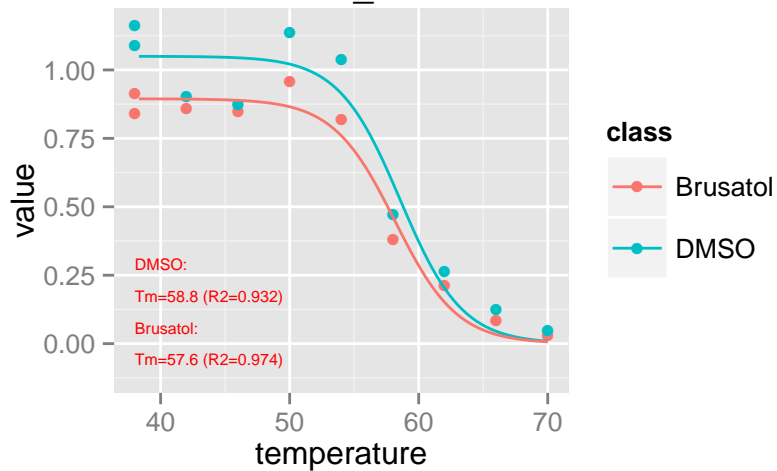

Prot: VATE1\_HUMAN

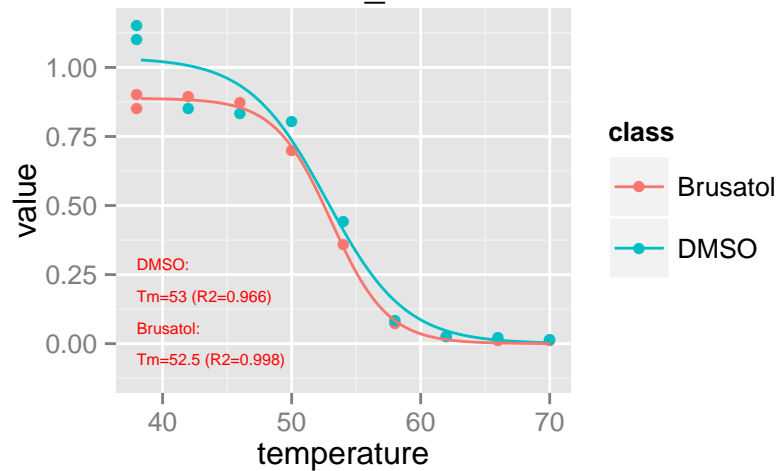

Prot: VATG1\_HUMAN

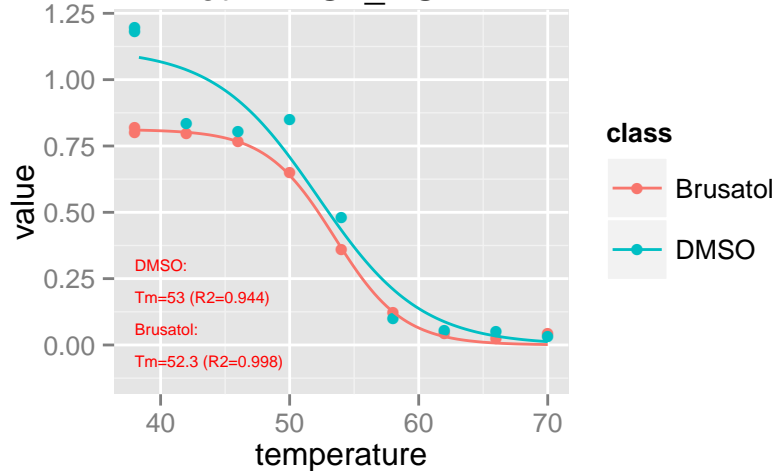

Prot: VATH\_HUMAN

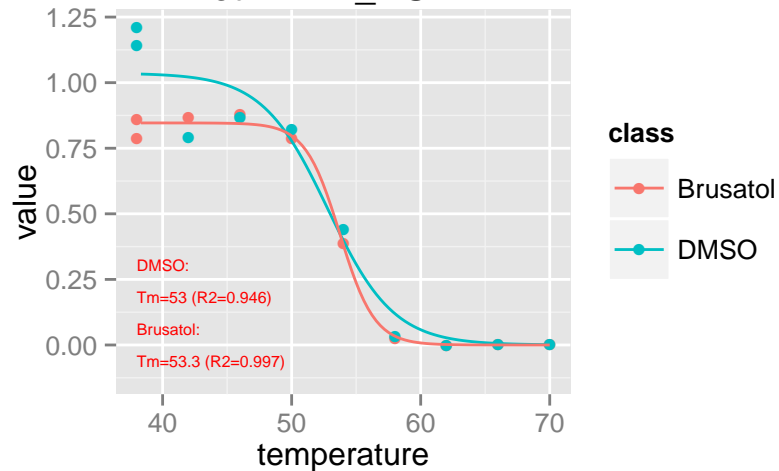

Prot: VAV2\_HUMAN

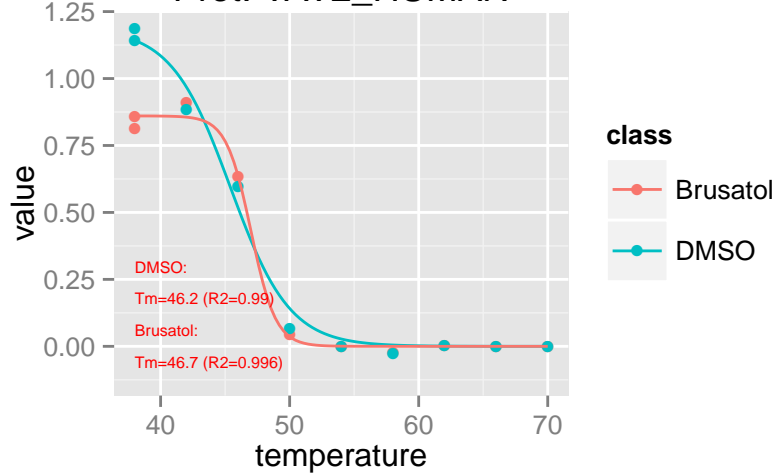

Prot: VCIP1\_HUMAN

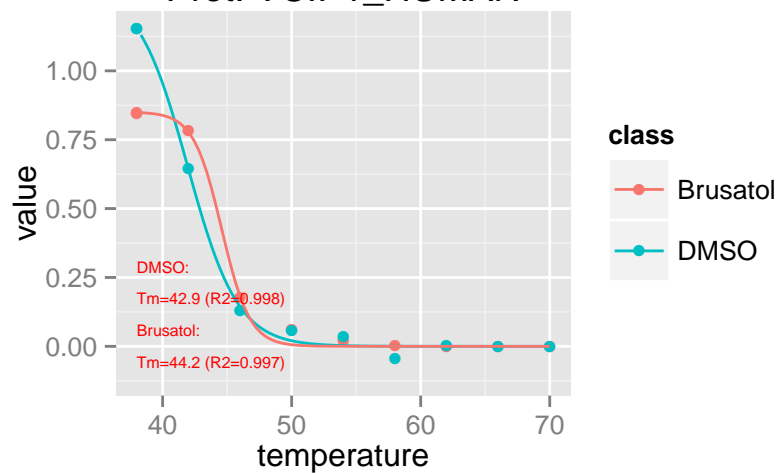

Prot: VGLL4\_HUMAN

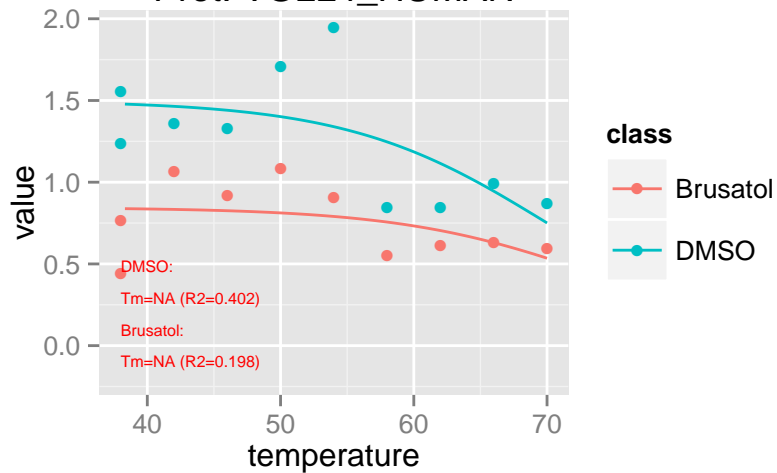

Prot: VIGLN\_HUMAN

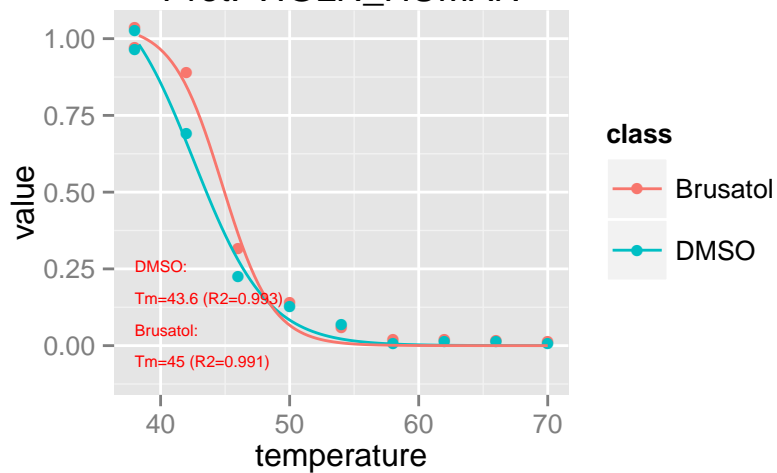

Prot: VIME\_HUMAN

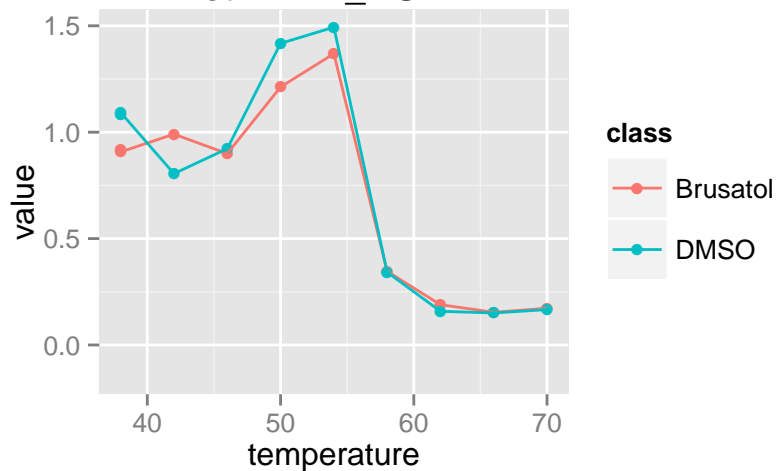

Prot: VINC\_HUMAN

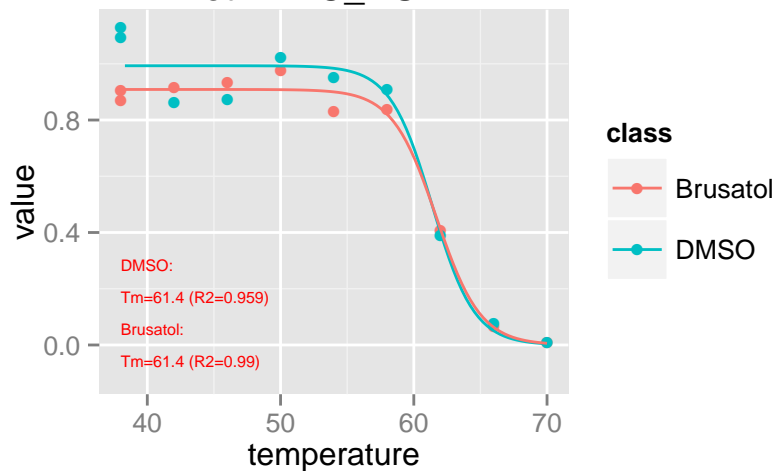

Prot: VINEX\_HUMAN

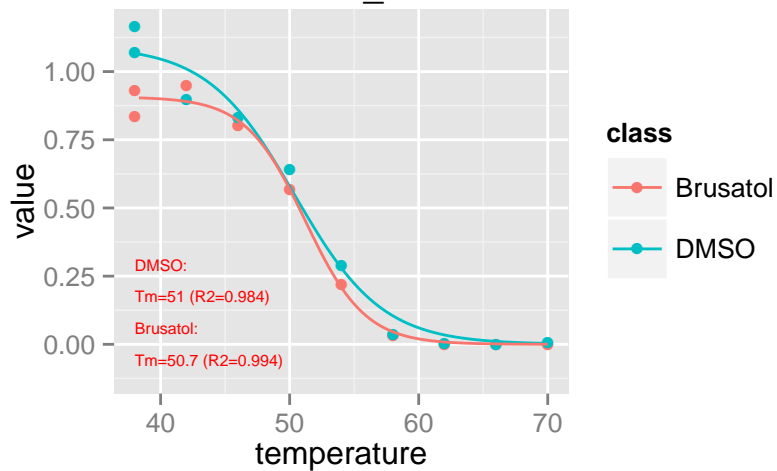

Prot: VIP2\_HUMAN

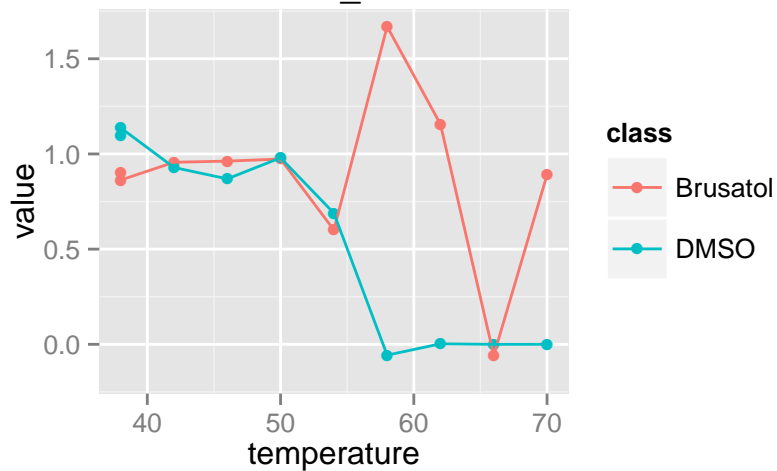

Prot: VIPAR\_HUMAN

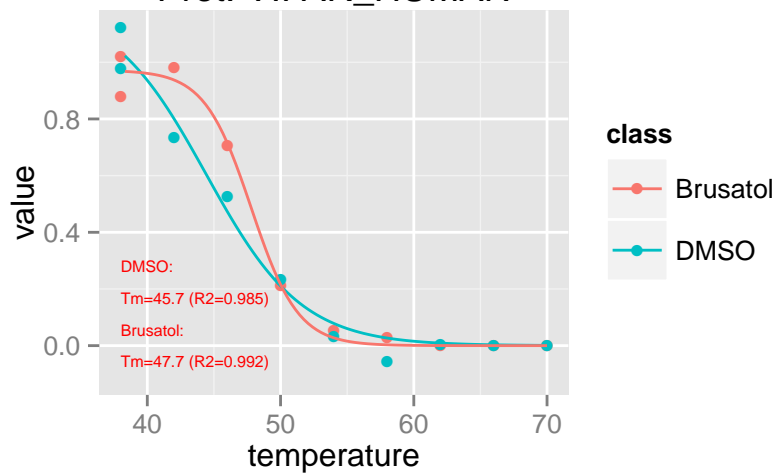

Prot: VIR\_HUMAN

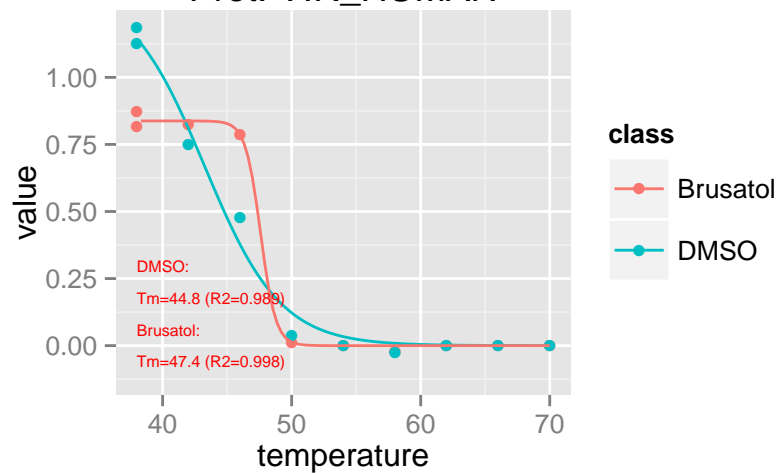

Prot: VP13C\_HUMAN

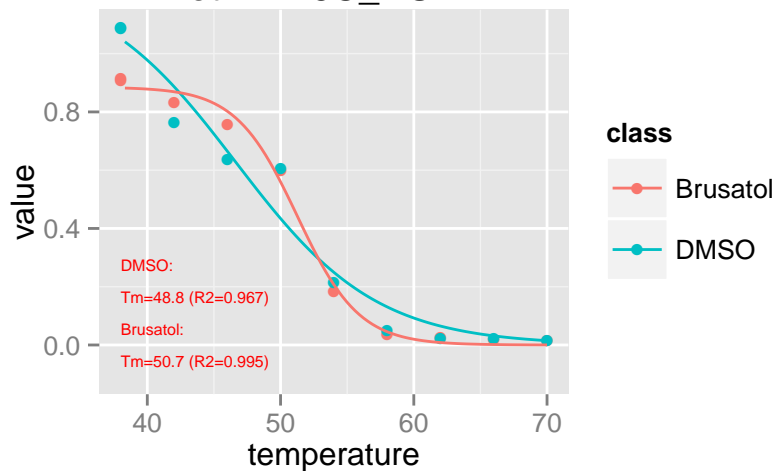

Prot: VP26A\_HUMAN

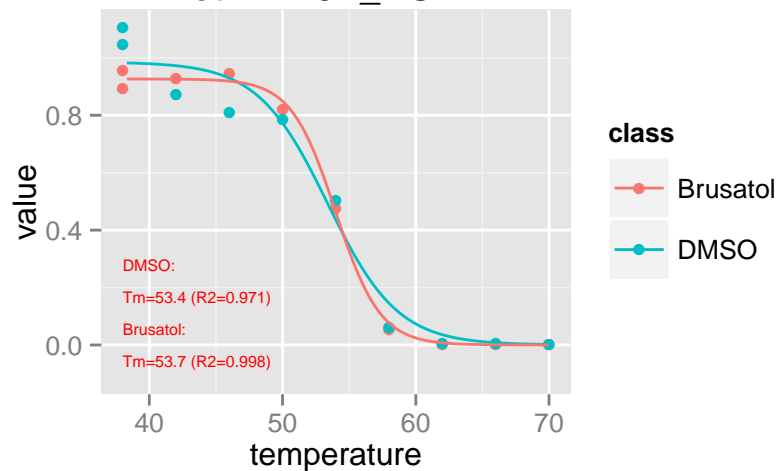

Prot: VP26B\_HUMAN

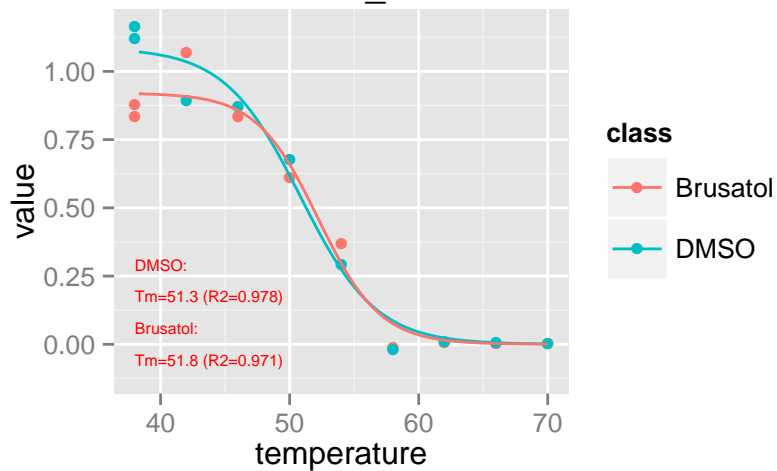

Prot: VP33B\_HUMAN

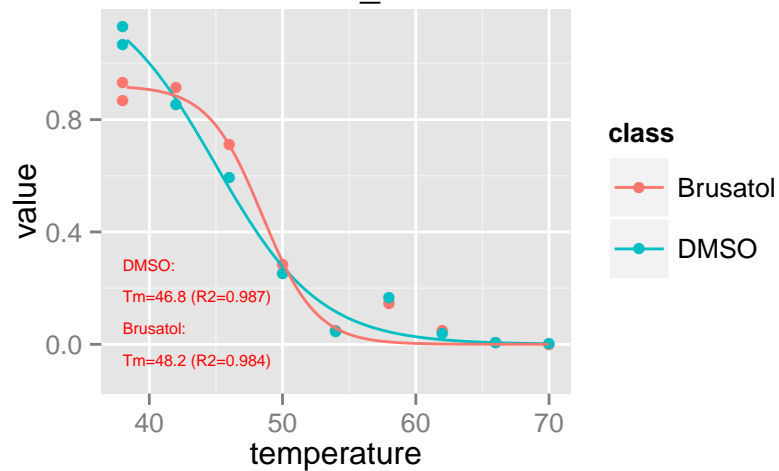

Prot: VP37A\_HUMAN

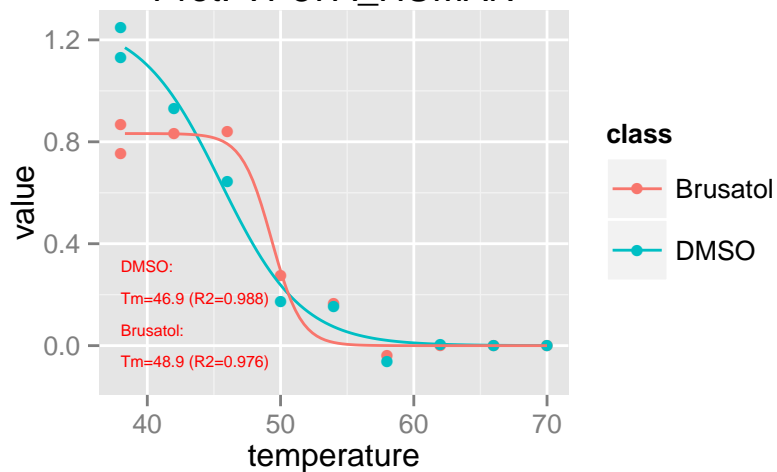

Prot: VPRBP\_HUMAN

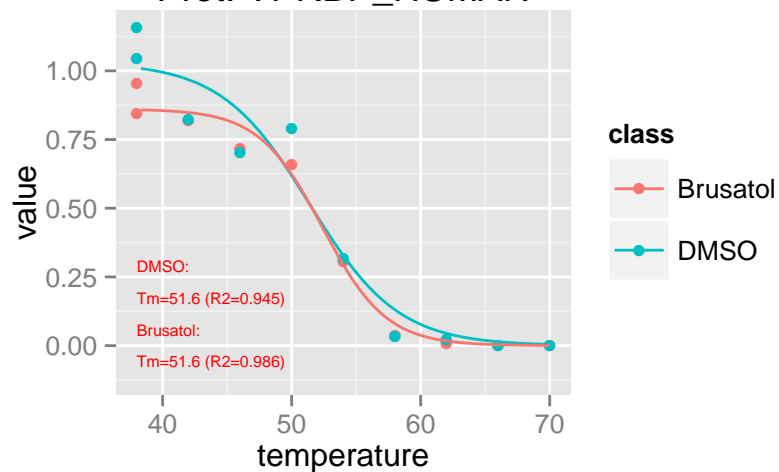

Prot: VPS25\_HUMAN

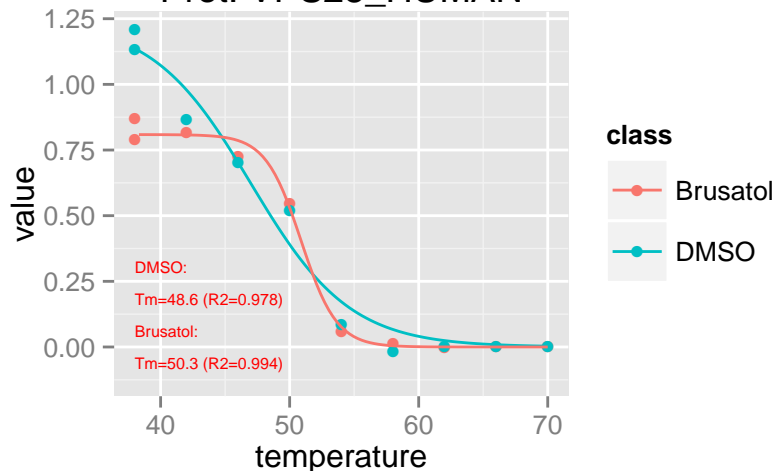

Prot: VPS28\_HUMAN

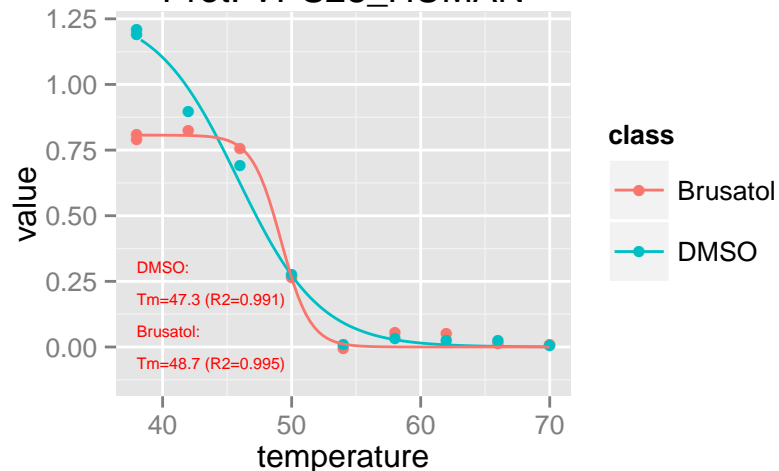

Prot: VPS29\_HUMAN

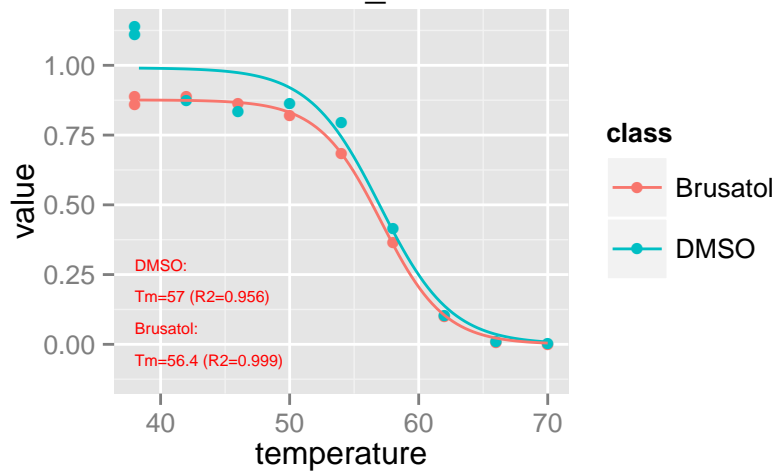

Prot: VPS35\_HUMAN

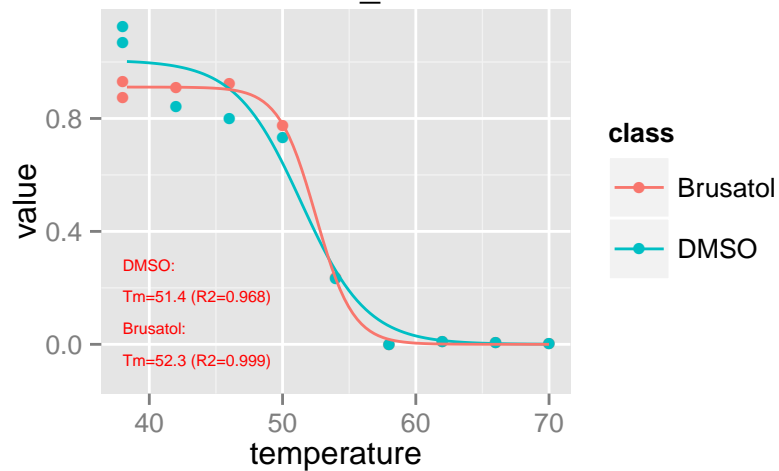

Prot: VPS36\_HUMAN

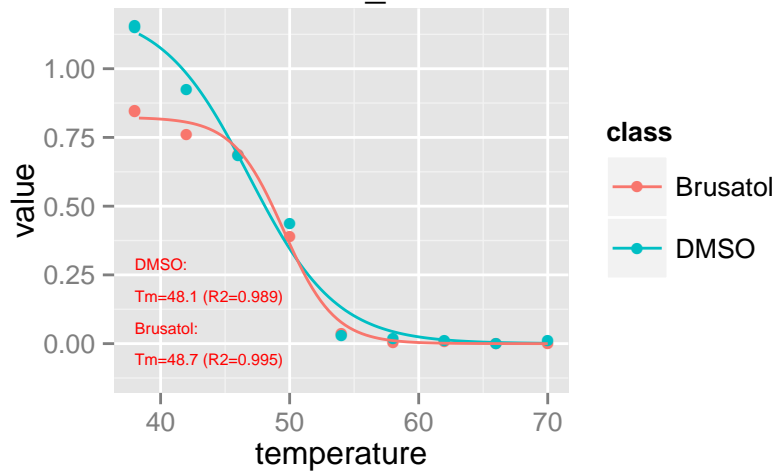

Prot: VPS45\_HUMAN

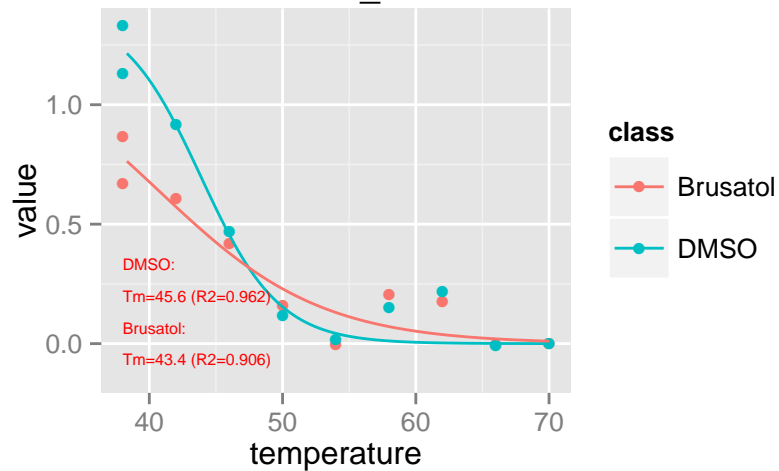

Prot: VPS4A\_HUMAN

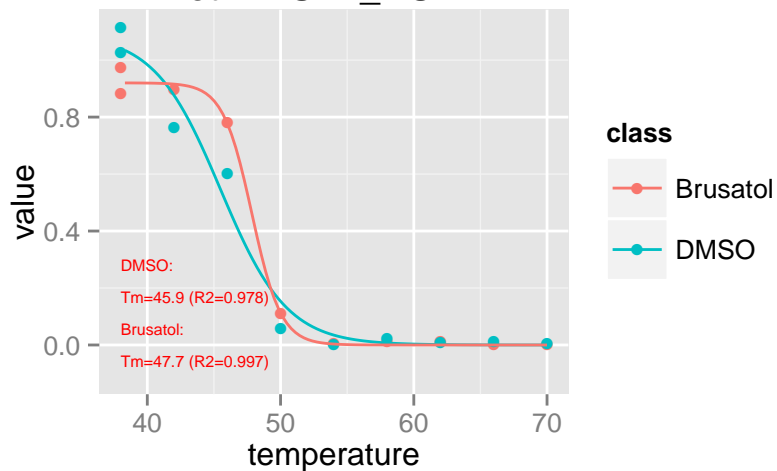

Prot: VPS4B\_HUMAN

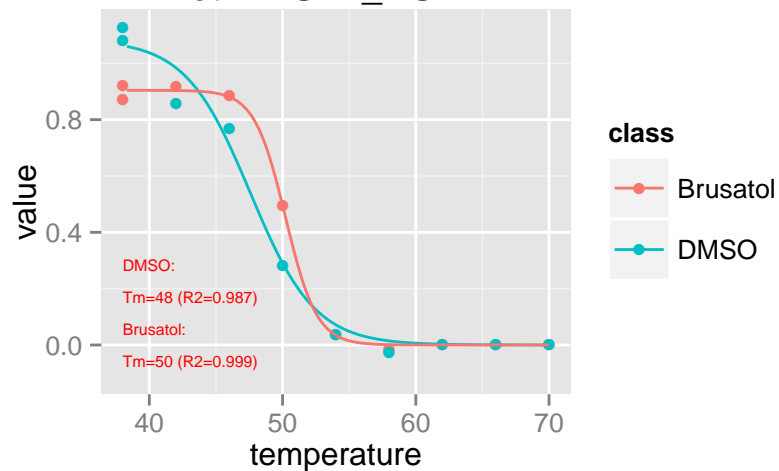

Prot: VPS52\_HUMAN

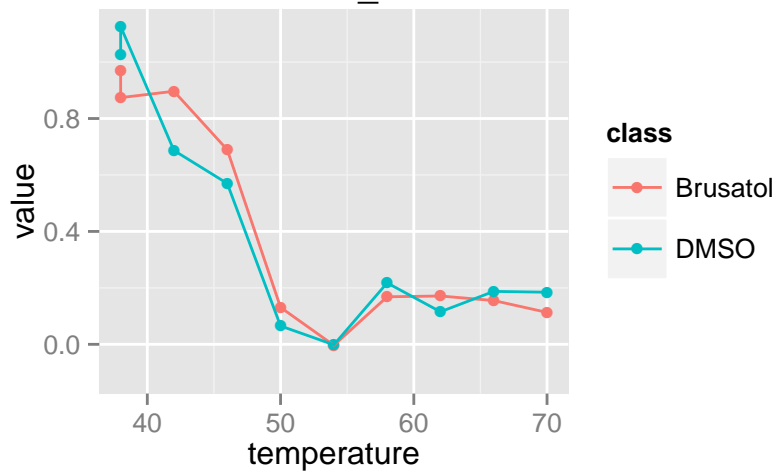

Prot: VPS53\_HUMAN

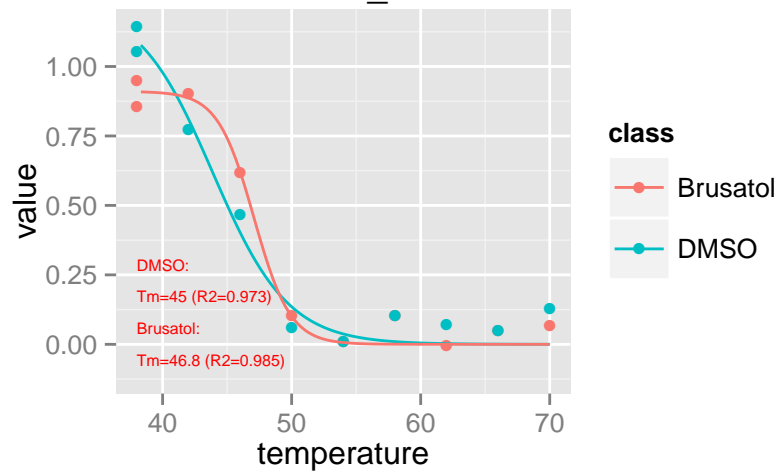

Prot: VTA1\_HUMAN

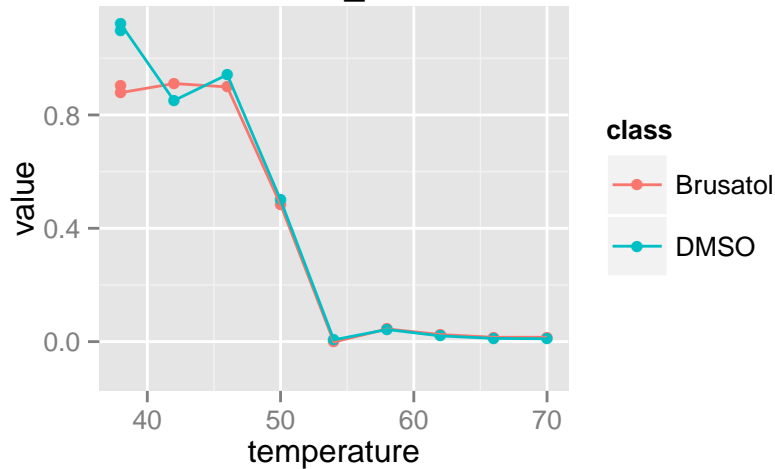

Prot: VTDB\_HUMAN

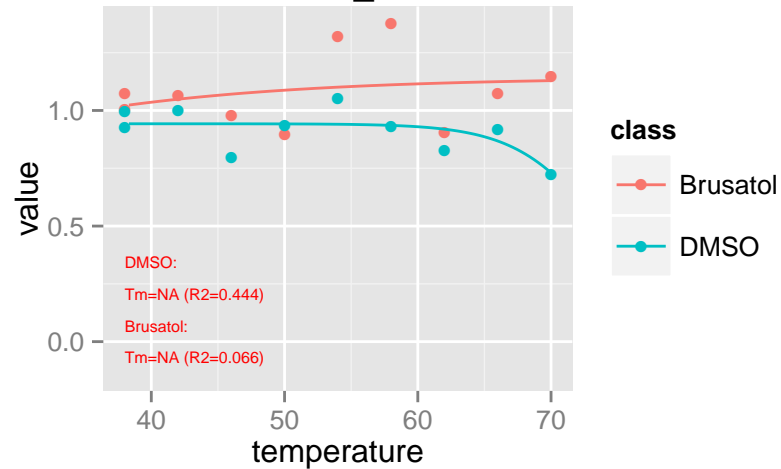

Prot: WAC\_HUMAN

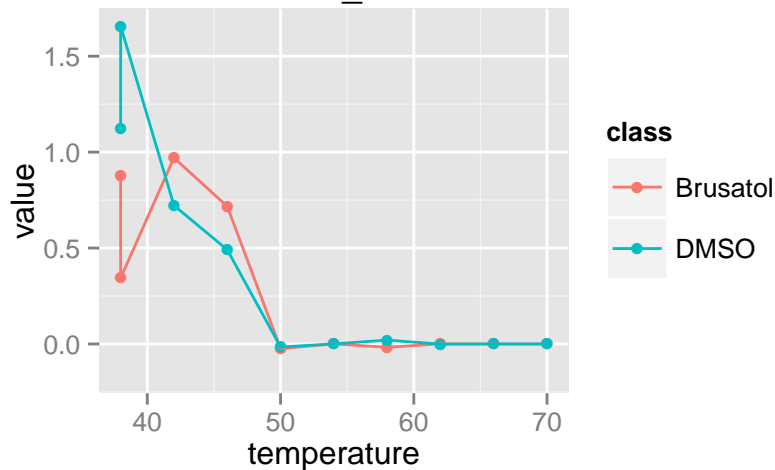

Prot: WAP53\_HUMAN

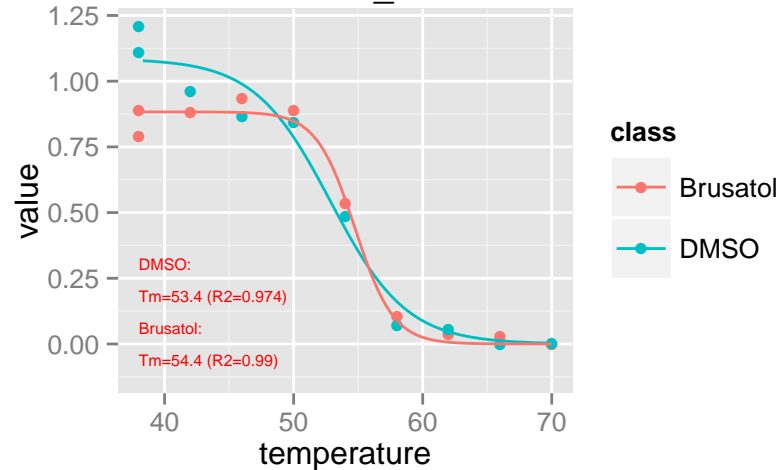

Prot: WAPL\_HUMAN

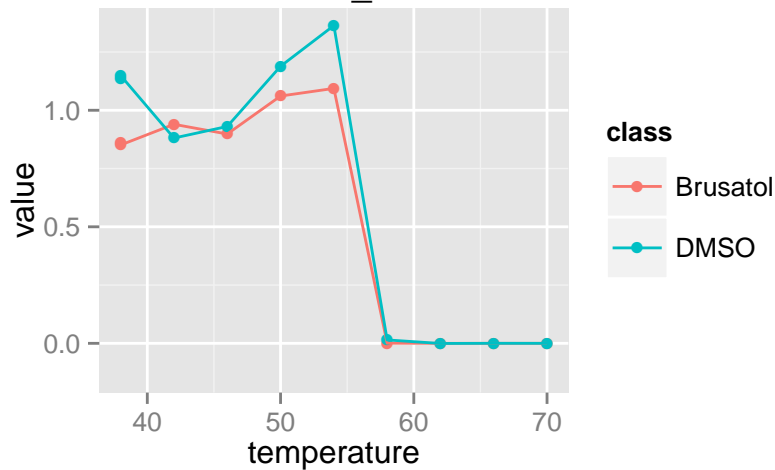

Prot: WASF2\_HUMAN

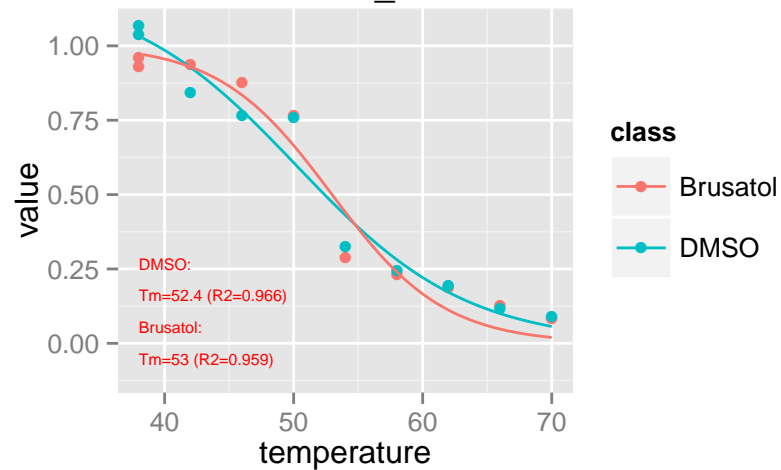



Prot: WASH1\_HUMAN

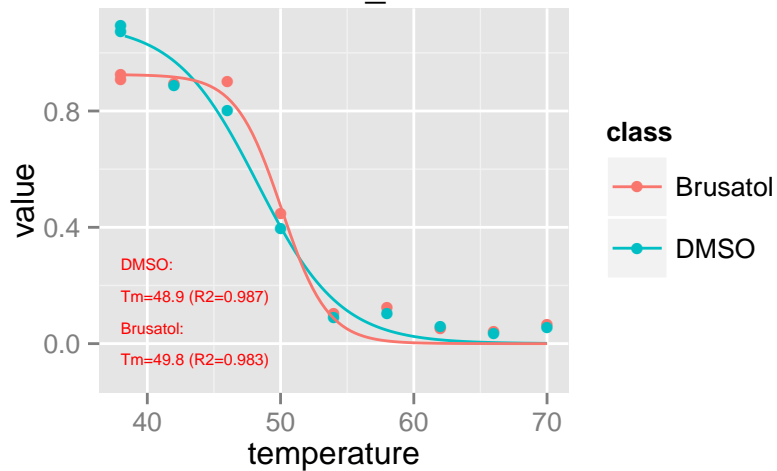

Prot: WASH7\_HUMAN

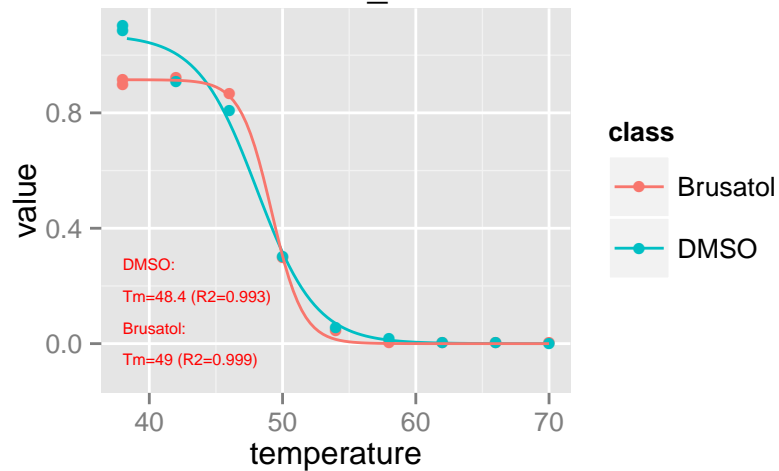

Prot: WASL\_HUMAN

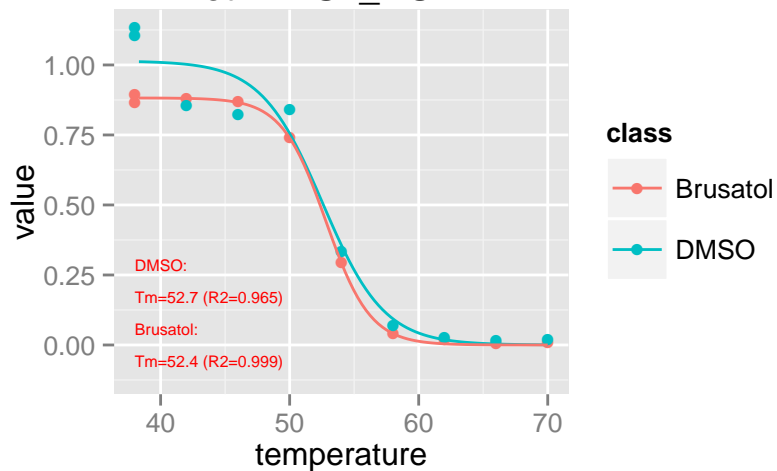

Prot: WBP11\_HUMAN

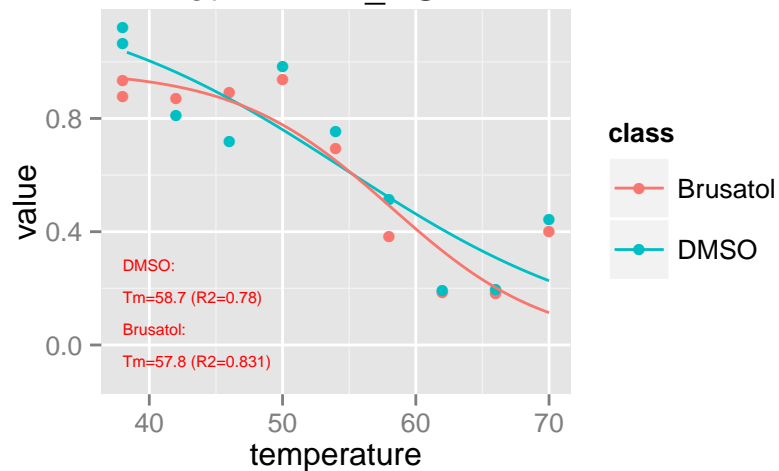

Prot: WBP2\_HUMAN

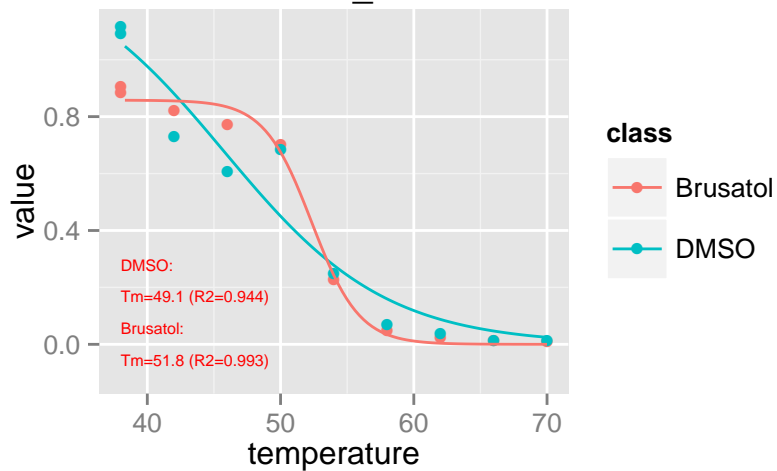

Prot: WDFY1\_HUMAN

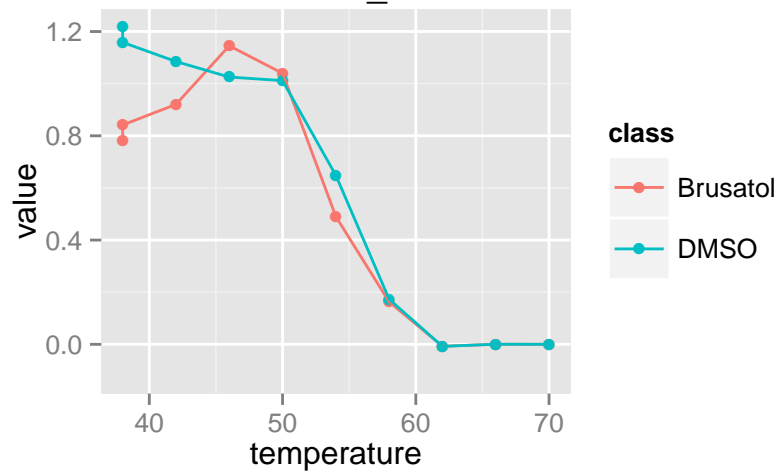

Prot: WDHD1\_HUMAN

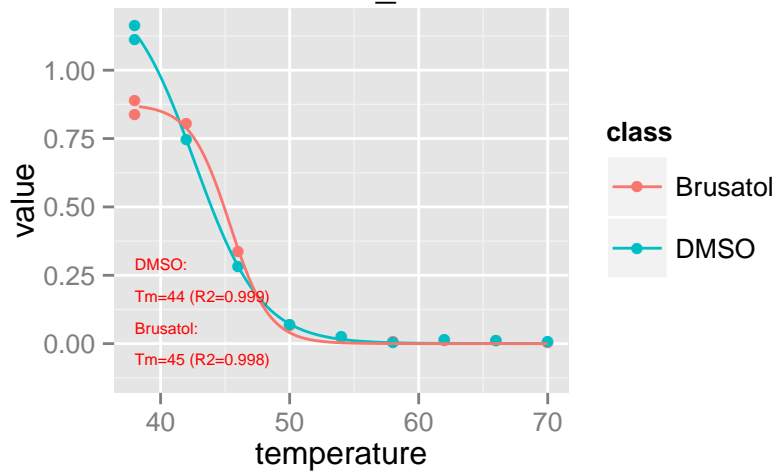

Prot: WDR1\_HUMAN

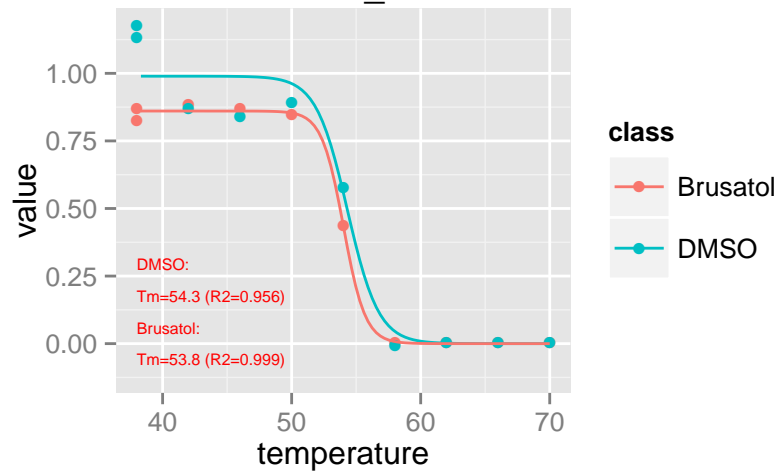

Prot: WDR11\_HUMAN

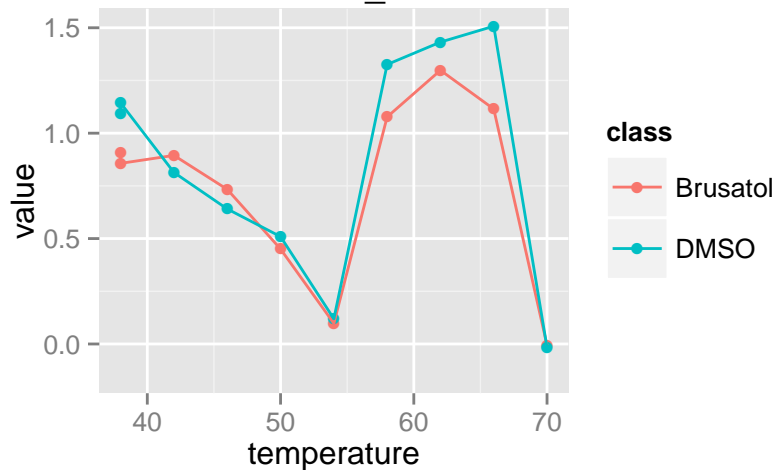

Prot: WDR12\_HUMAN

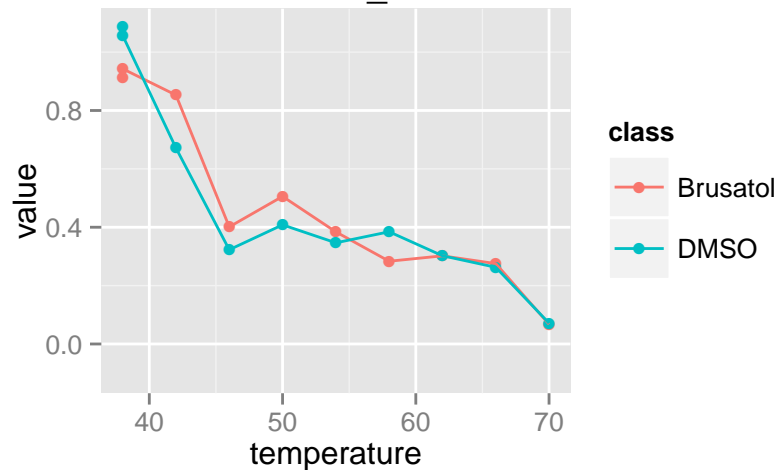

Prot: WDR18\_HUMAN

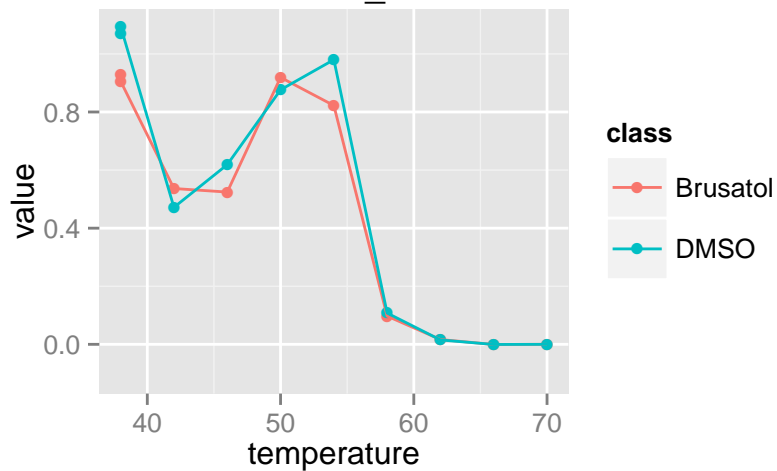

Prot: WDR26\_HUMAN

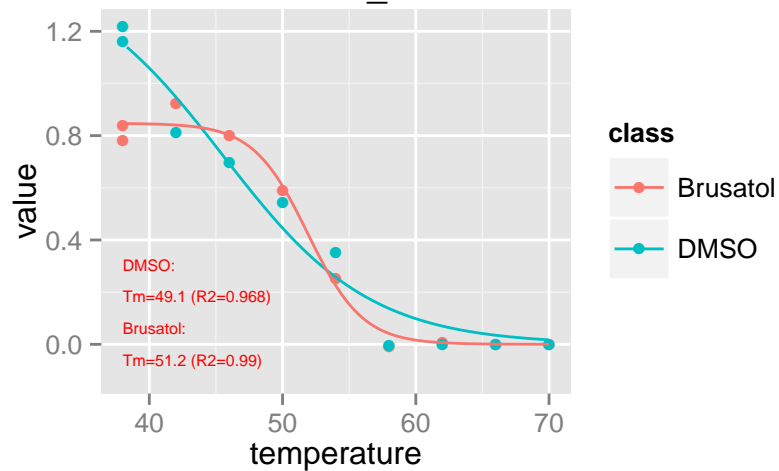

Prot: WDR33\_HUMAN

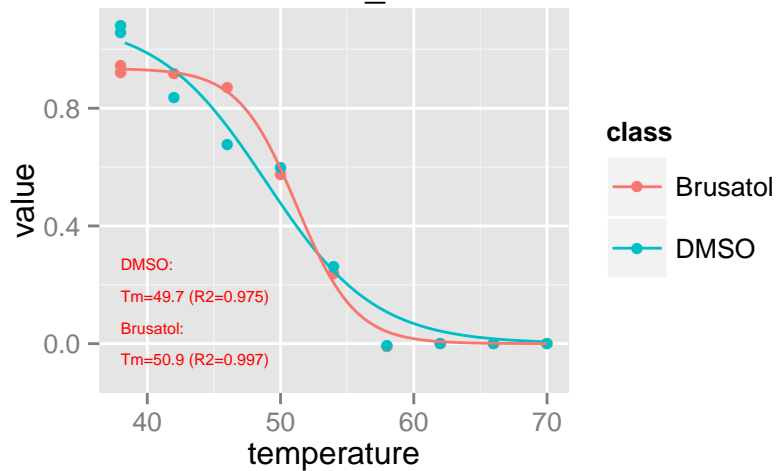

Prot: WDR4\_HUMAN

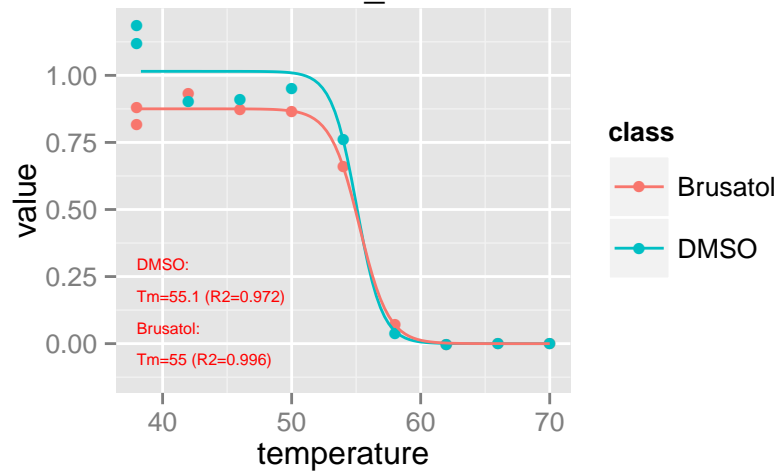

Prot: WDR41\_HUMAN

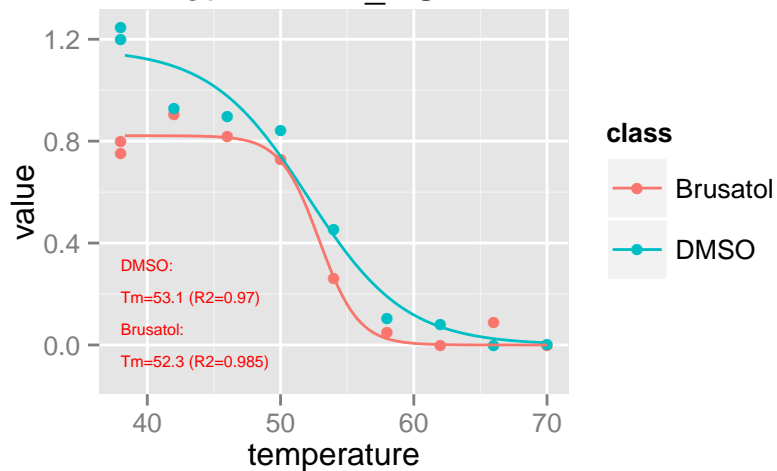

Prot: WDR43\_HUMAN

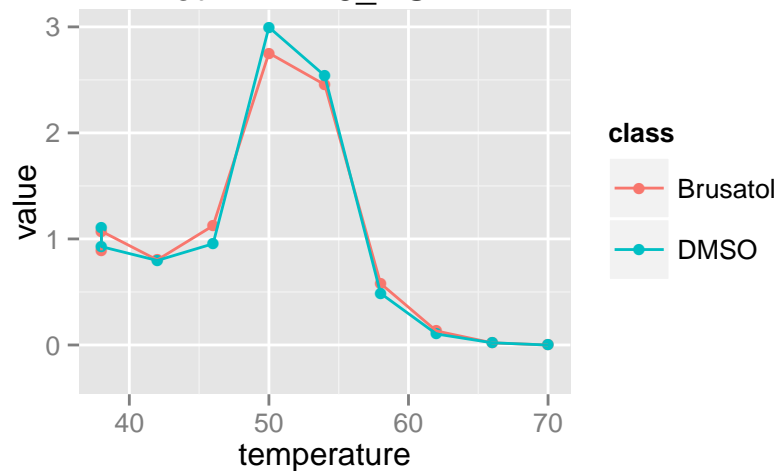

Prot: WDR44\_HUMAN

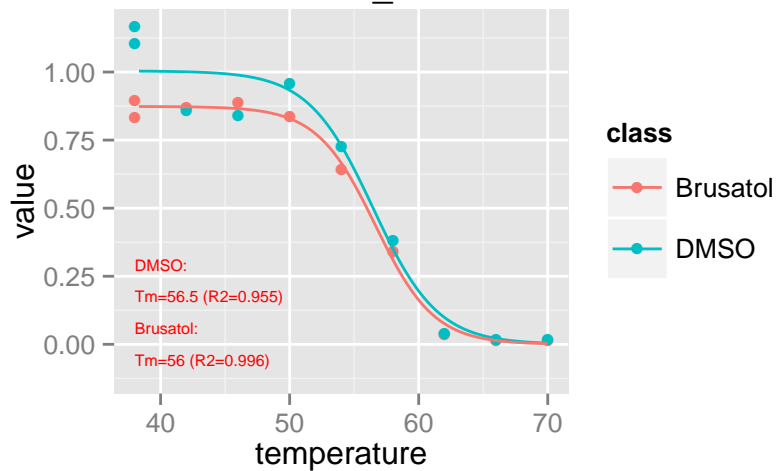

Prot: WDR48\_HUMAN

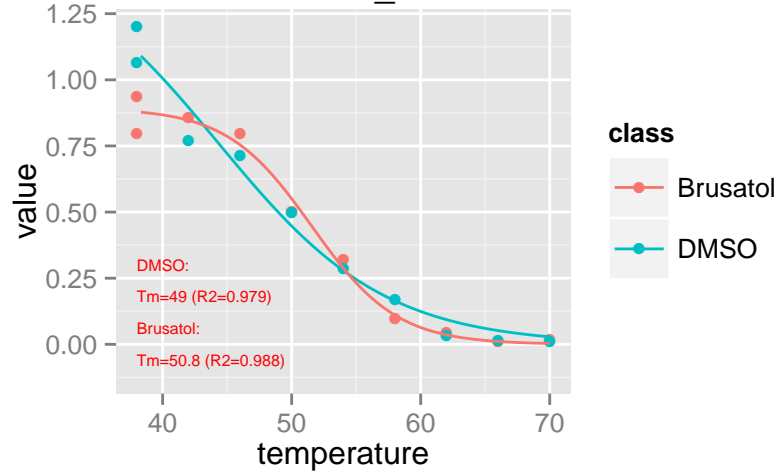

Prot: WDR5\_HUMAN

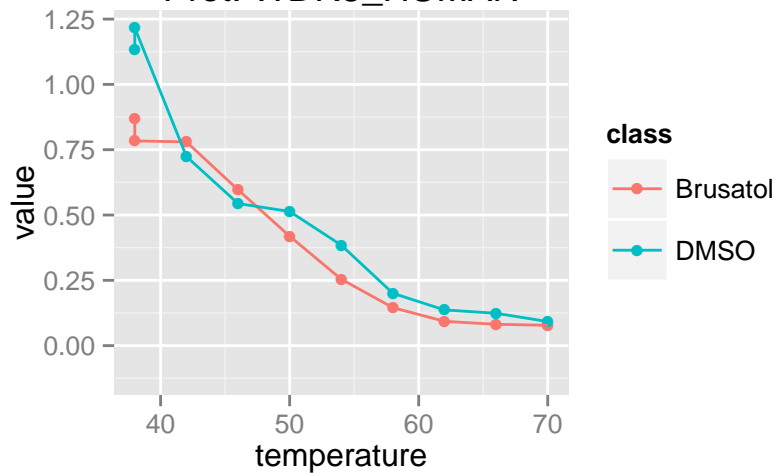

Prot: WDR54\_HUMAN

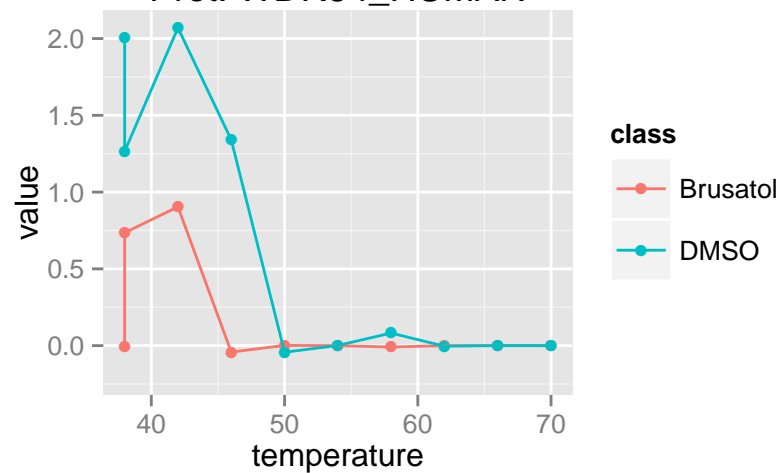

Prot: WDR61\_HUMAN

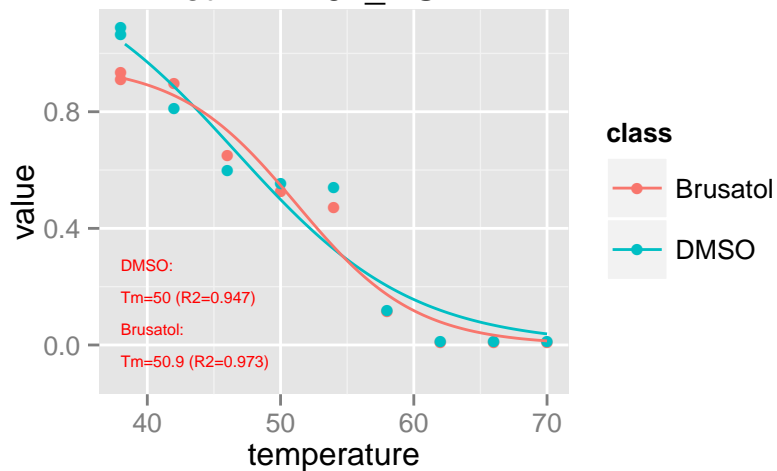

Prot: WDR62\_HUMAN

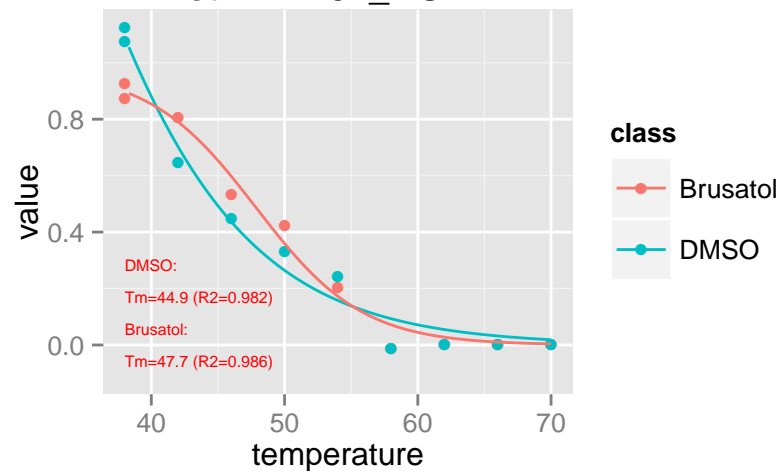

Prot: WDR70\_HUMAN

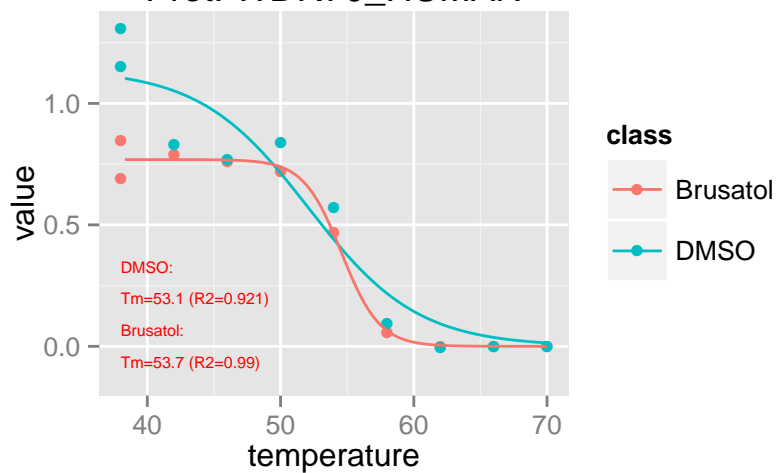

Prot: WDR73\_HUMAN

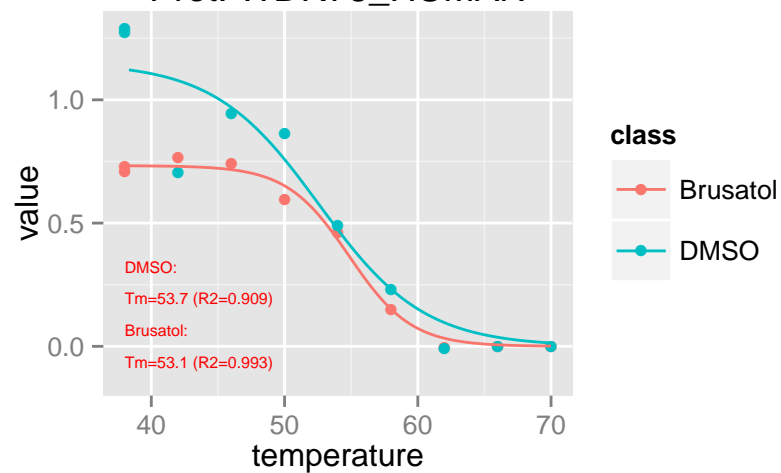

Prot: WDR82\_HUMAN

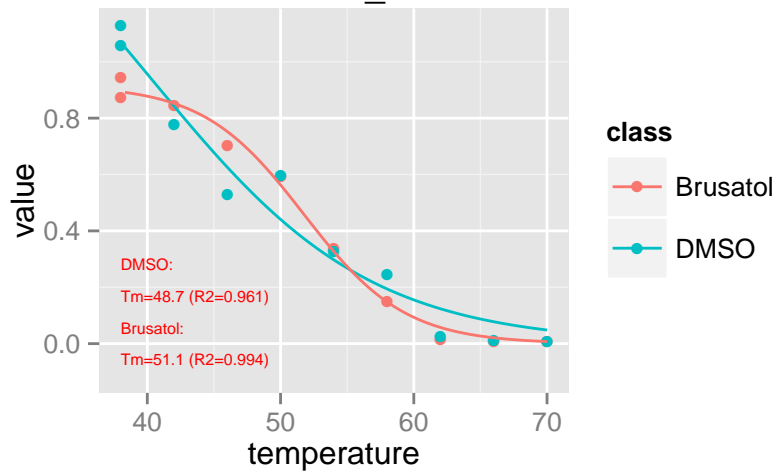

Prot: WDR92\_HUMAN

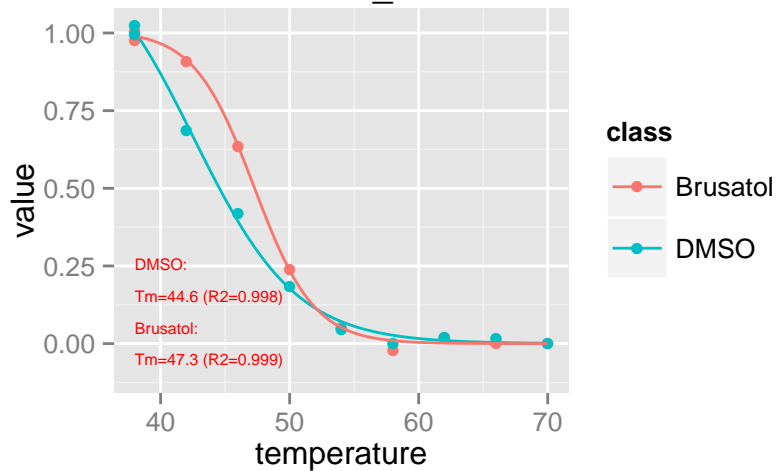

Prot: WIBG\_HUMAN

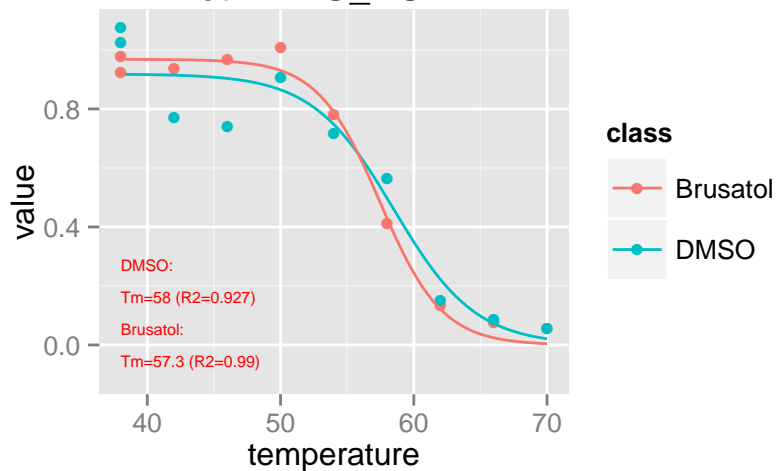

Prot: WIPF1\_HUMAN

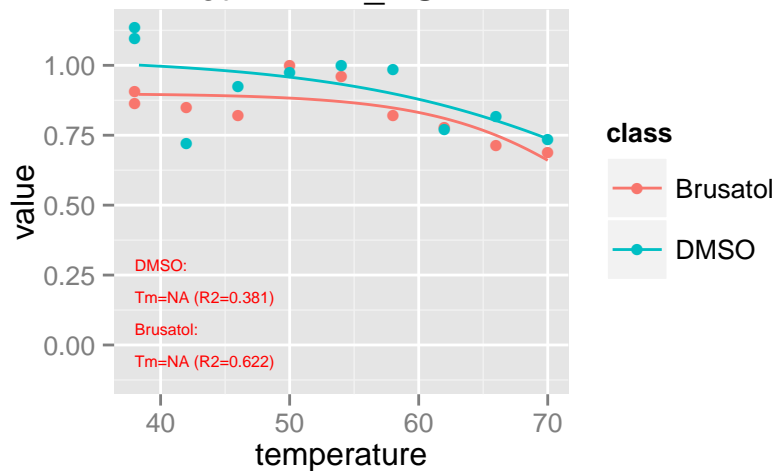

Prot: WIPF2\_HUMAN

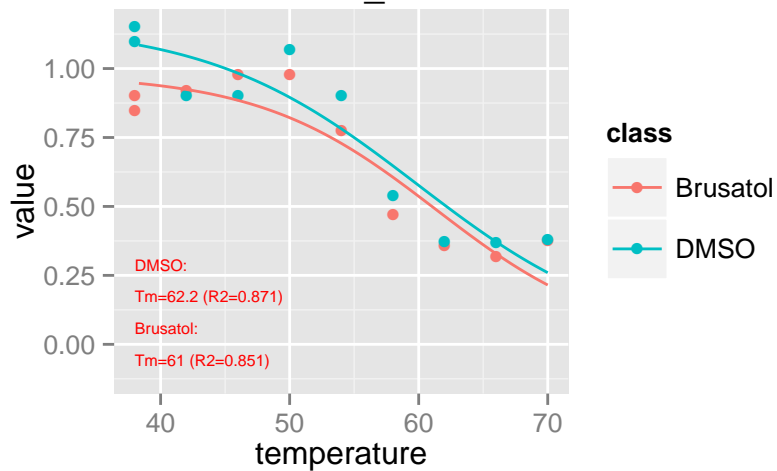

Prot: WIPI3\_HUMAN

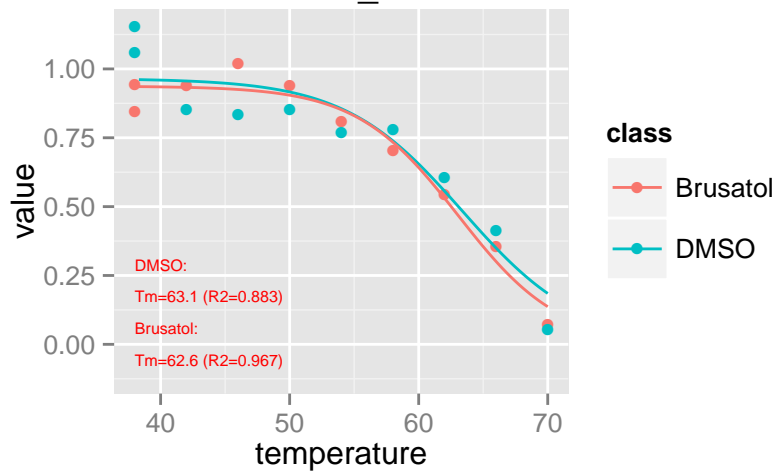

Prot: WIPI4\_HUMAN

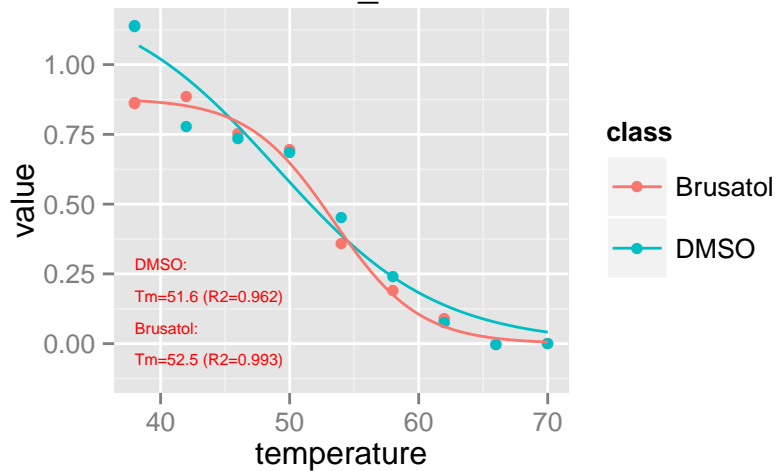

Prot: WNK1\_HUMAN

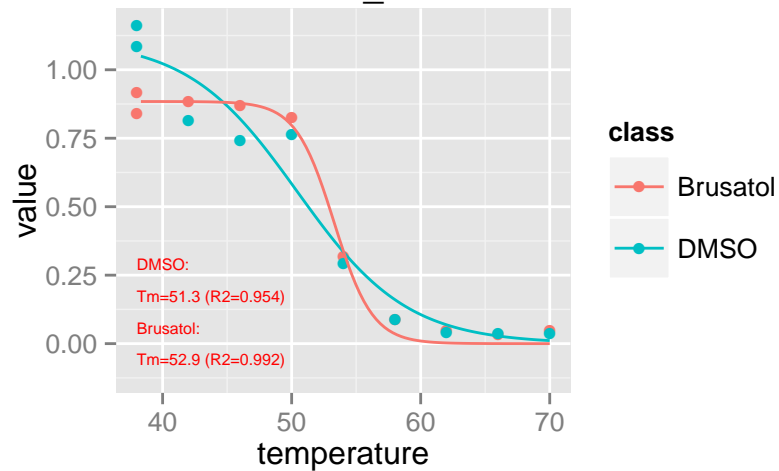

Prot: WRIP1\_HUMAN

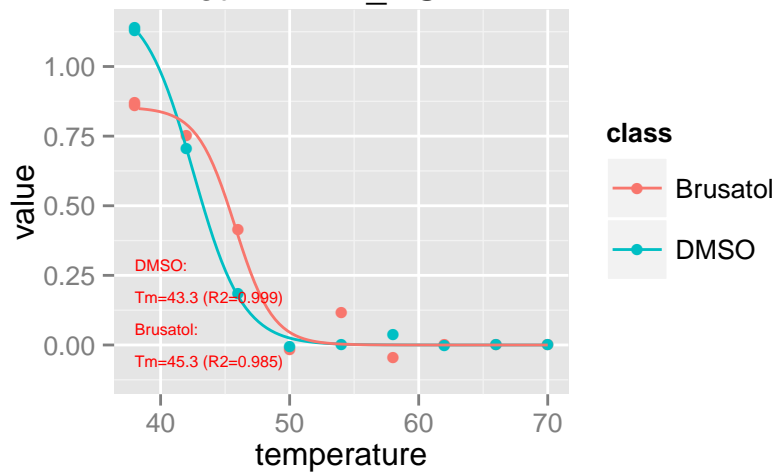

Prot: WSDU1\_HUMAN

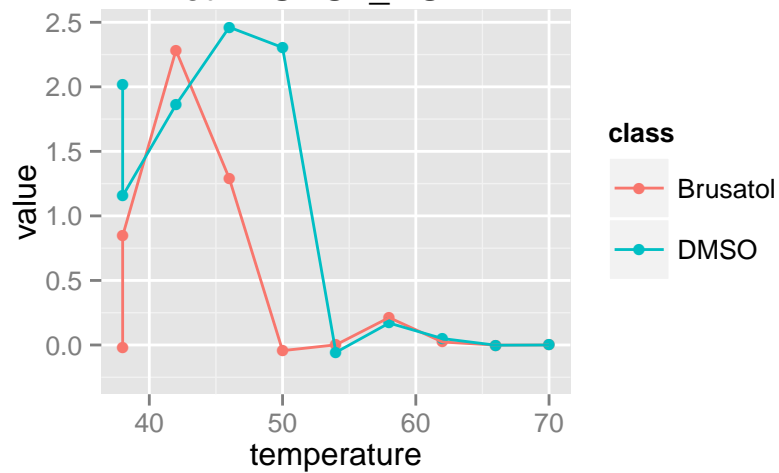

Prot: WWTR1\_HUMAN

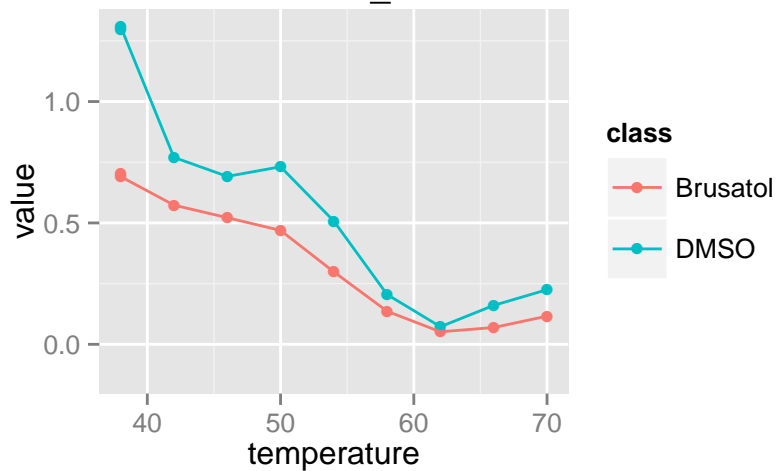

Prot: XIAP\_HUMAN

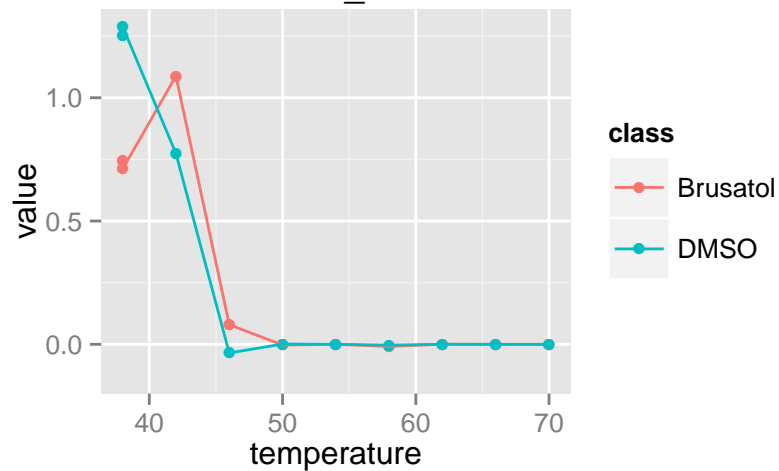

Prot: XPF\_HUMAN

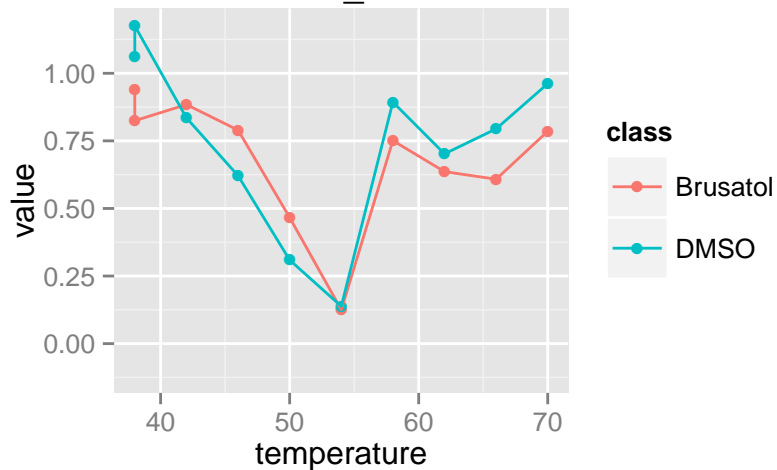

Prot: XPO1\_HUMAN

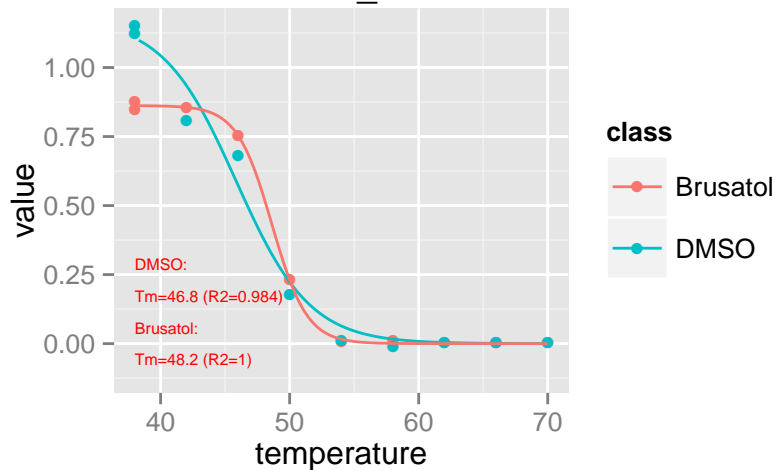

Prot: XPO2\_HUMAN

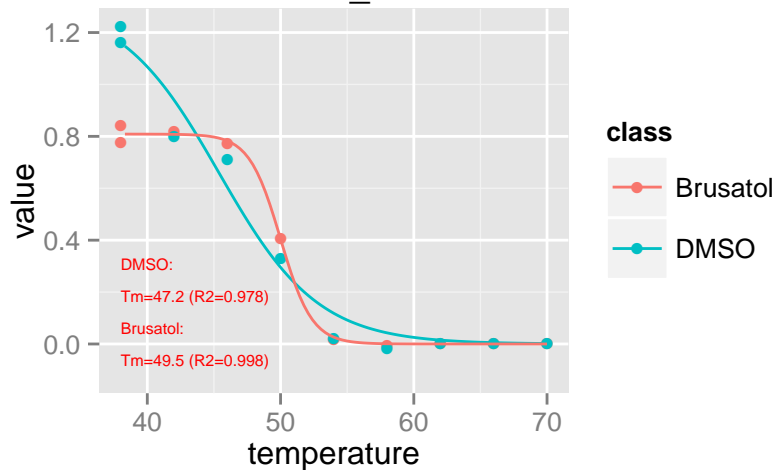

Prot: XPO4\_HUMAN

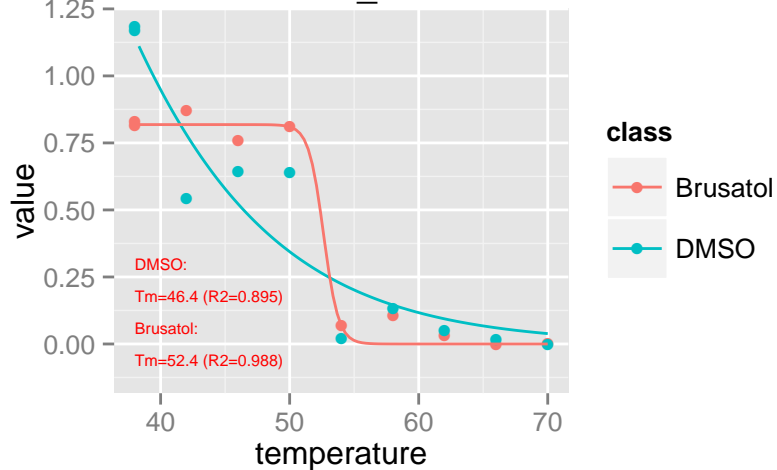

Prot: XPO5\_HUMAN

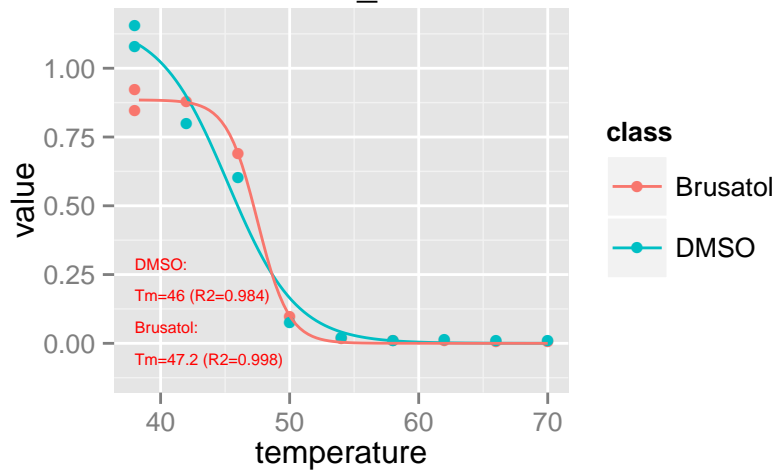

Prot: XPO6\_HUMAN

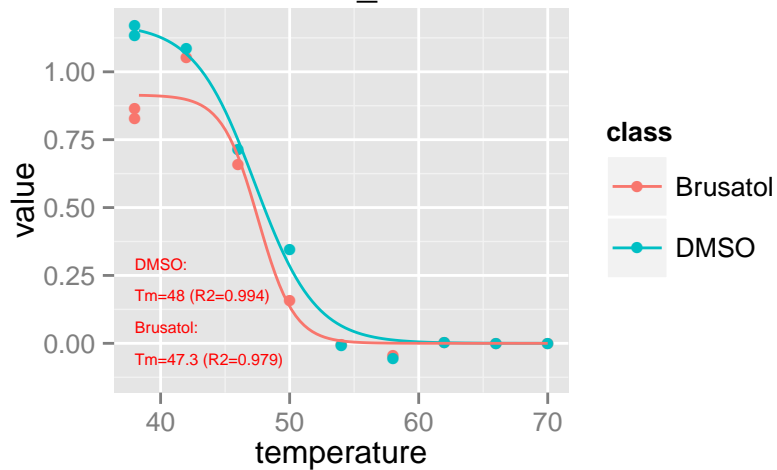

Prot: XPO7\_HUMAN

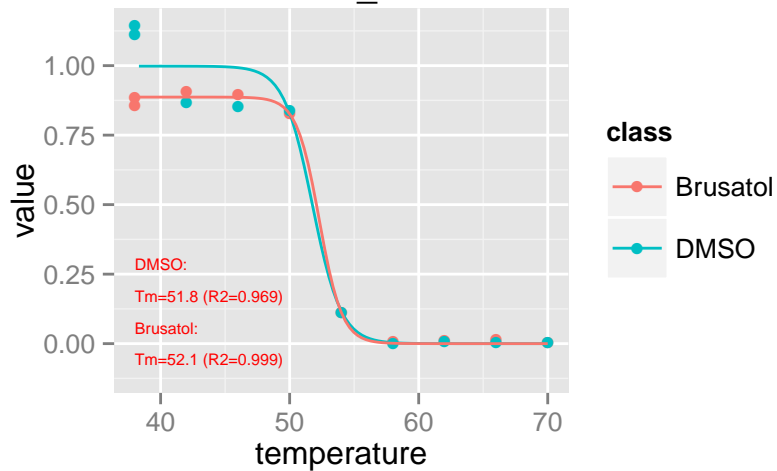

Prot: XPOT\_HUMAN

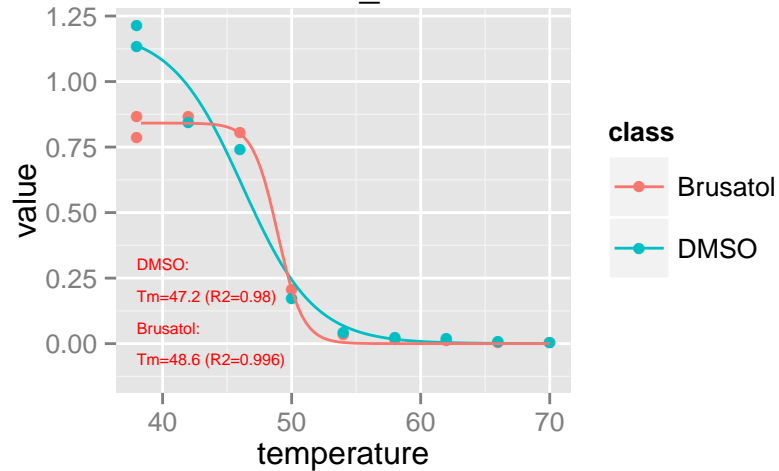

Prot: XPP1\_HUMAN

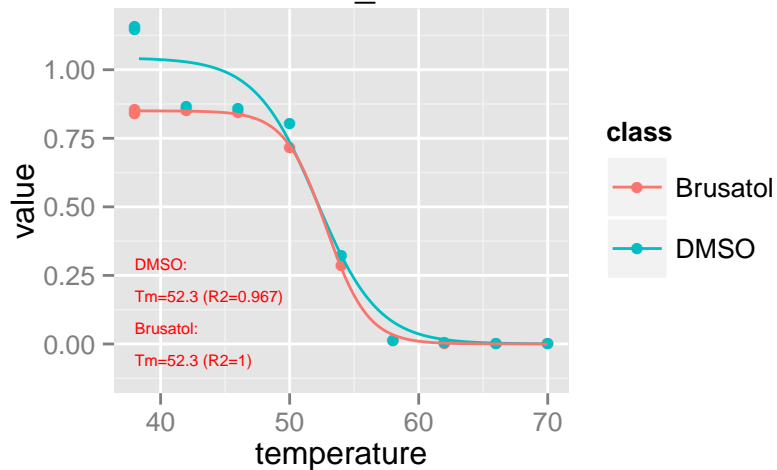

Prot: XPP3\_HUMAN

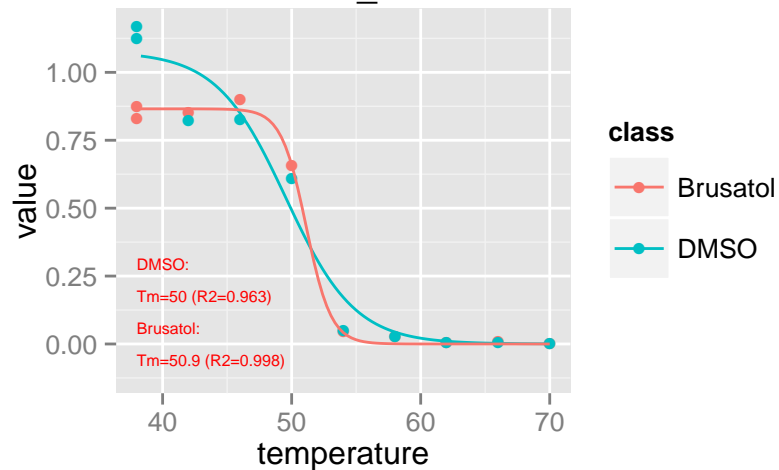

Prot: XRCC1\_HUMAN

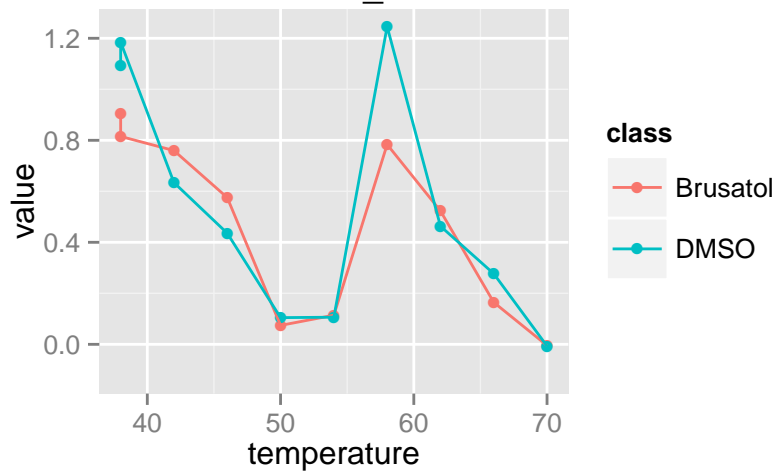

Prot: XRCC4\_HUMAN

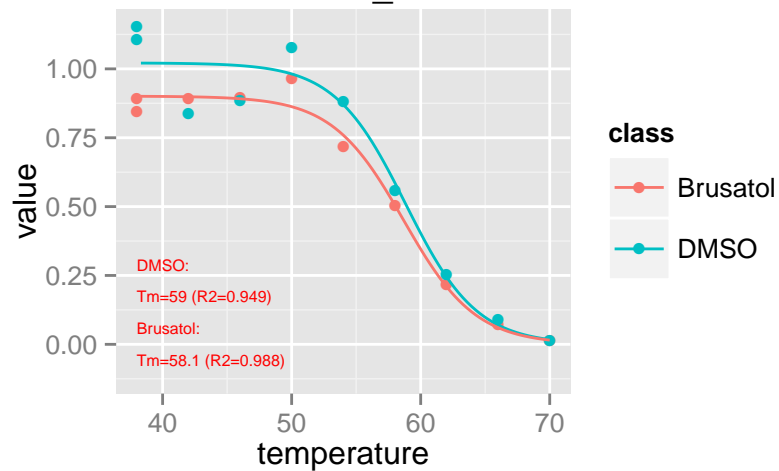



Prot: XRCC5\_HUMAN

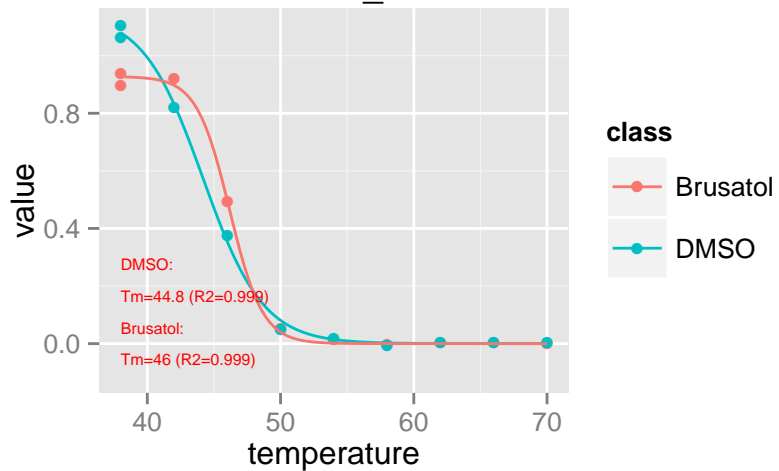

Prot: XRCC6\_HUMAN

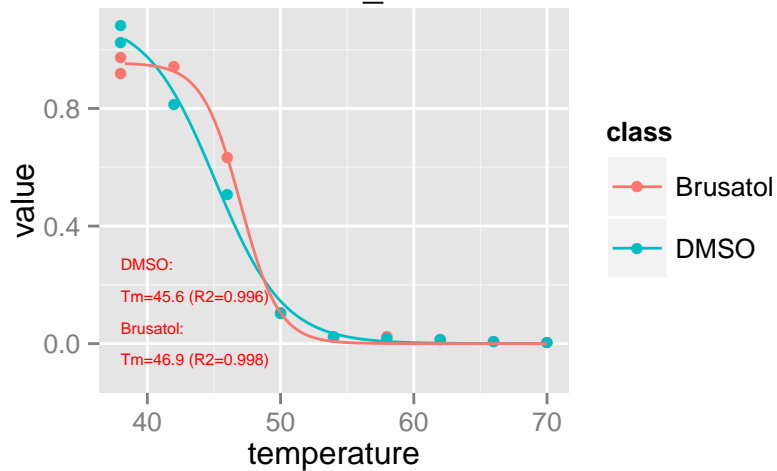

Prot: XRN2\_HUMAN

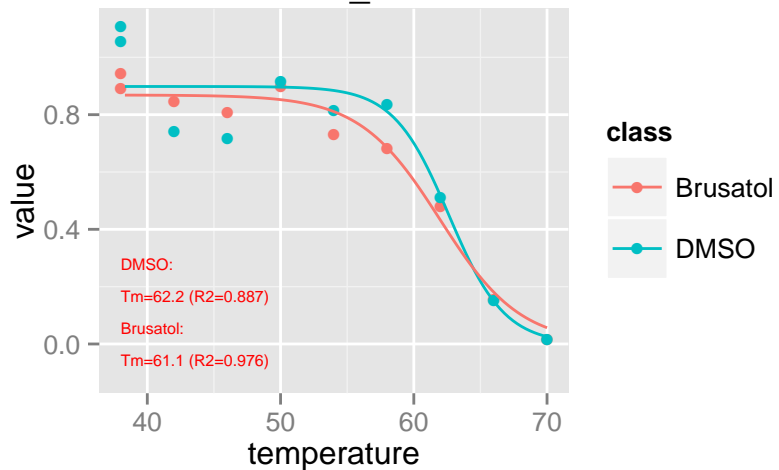

Prot: XYLB\_HUMAN

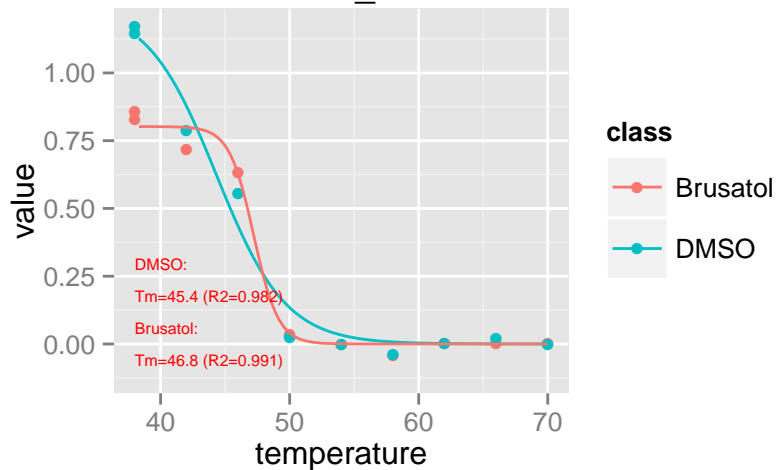

Prot: YAP1\_HUMAN

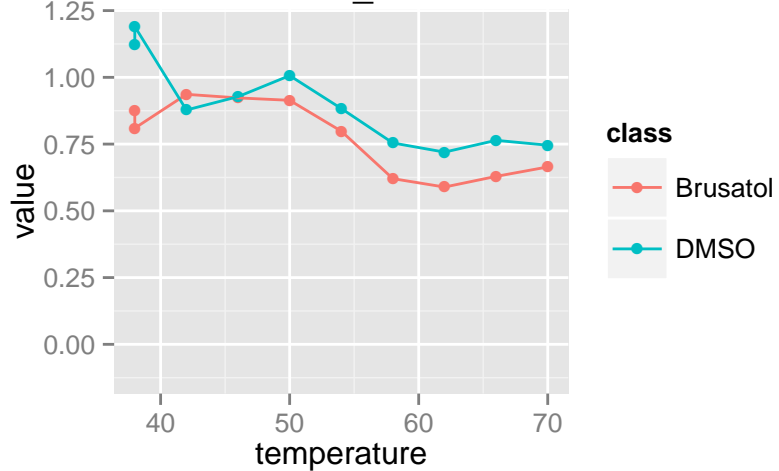

Prot: YBEY\_HUMAN

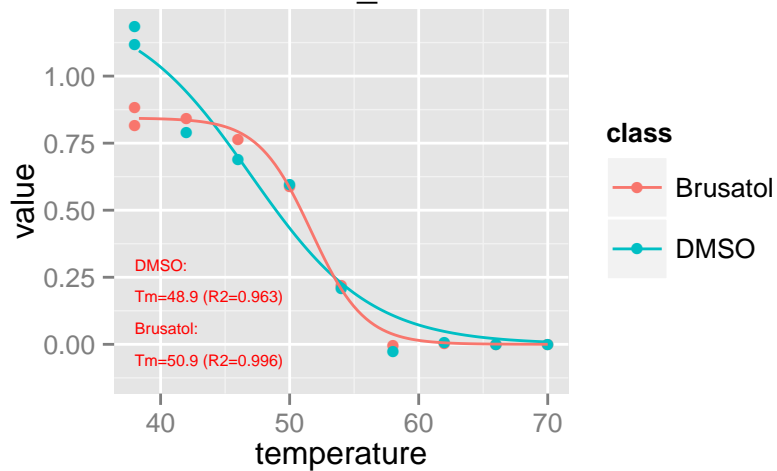

Prot: YBOX1\_HUMAN

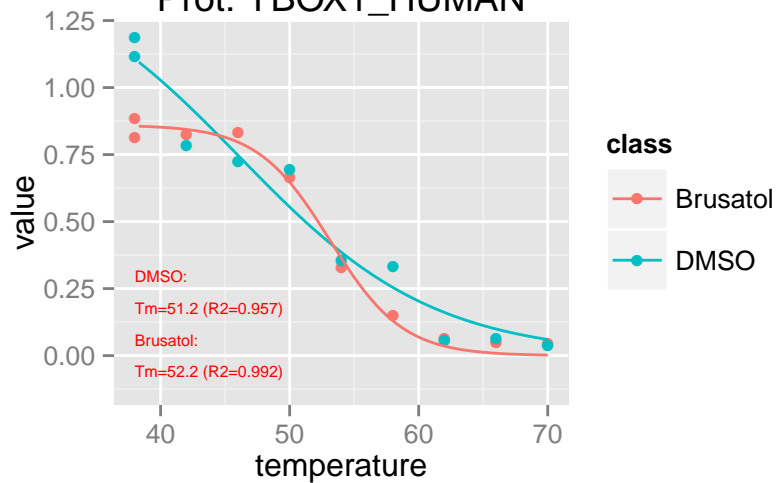

Prot: YJ005\_HUMAN

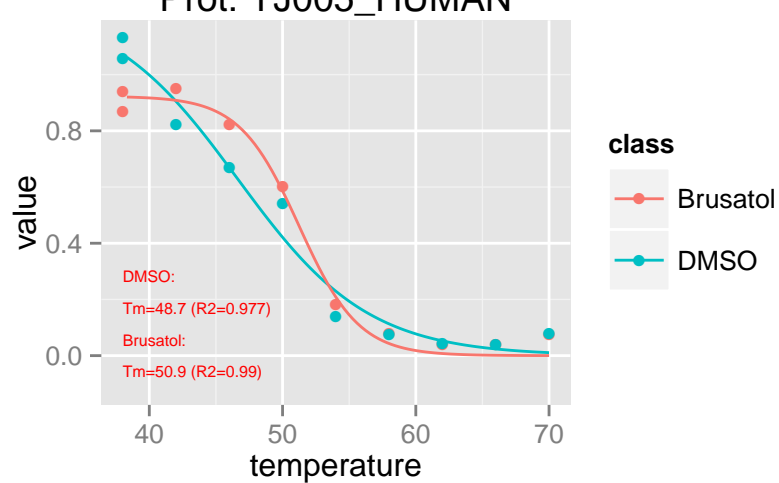

Prot: YKT6\_HUMAN

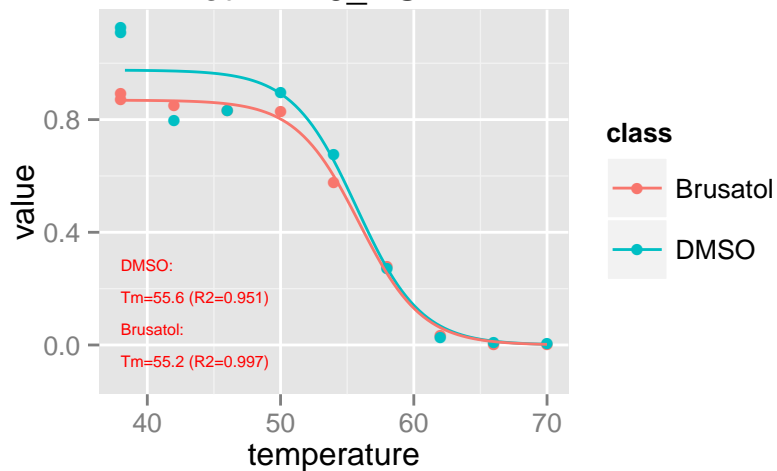

Prot: YLPM1\_HUMAN

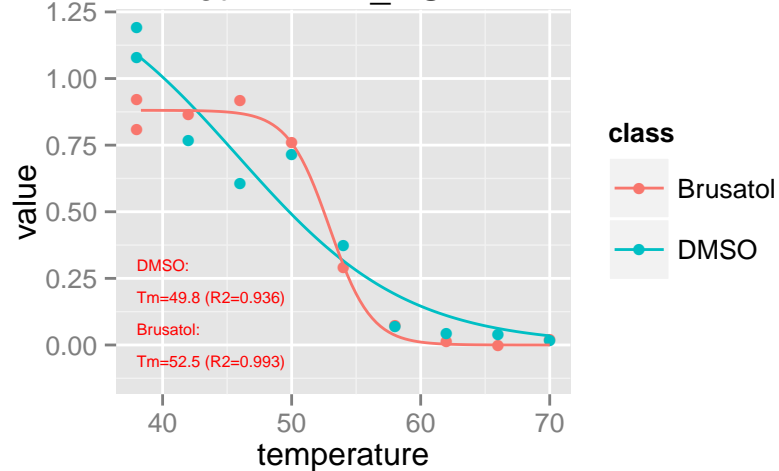

Prot: YTHD1\_HUMAN

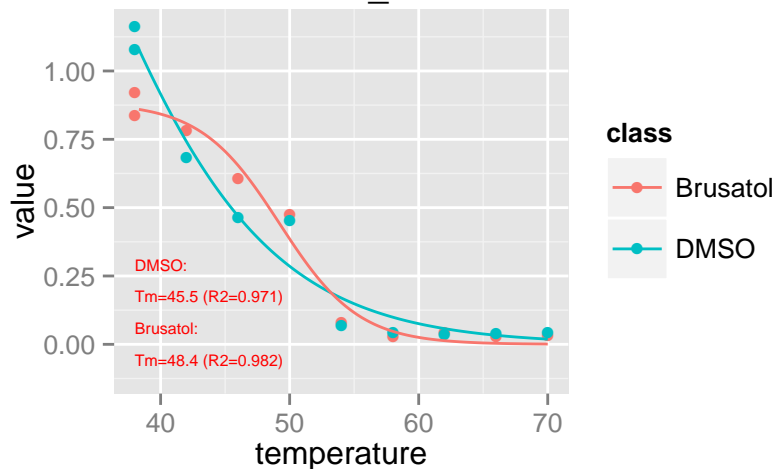

Prot: YTHD2\_HUMAN

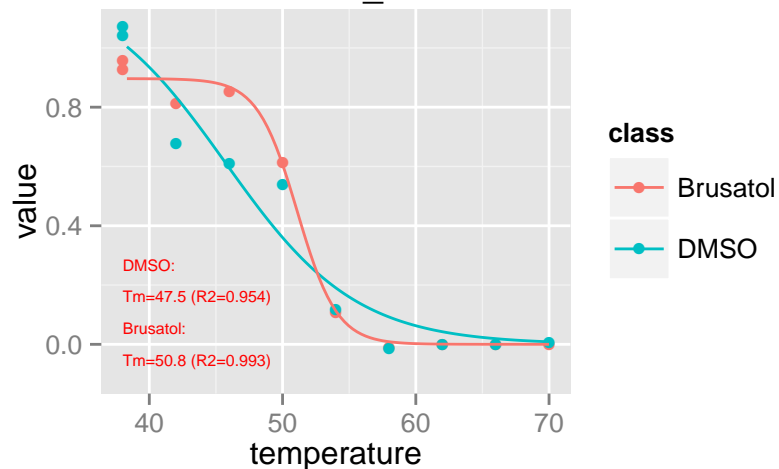

Prot: ZBED1\_HUMAN

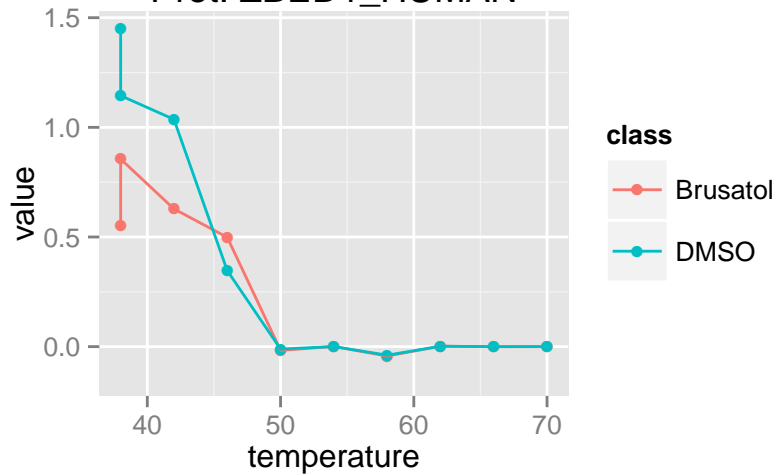

Prot: ZC3H4\_HUMAN

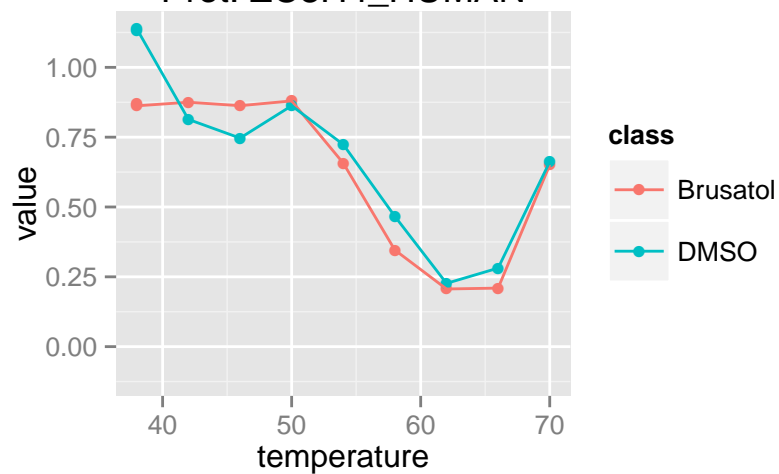

Prot: ZC3HE\_HUMAN

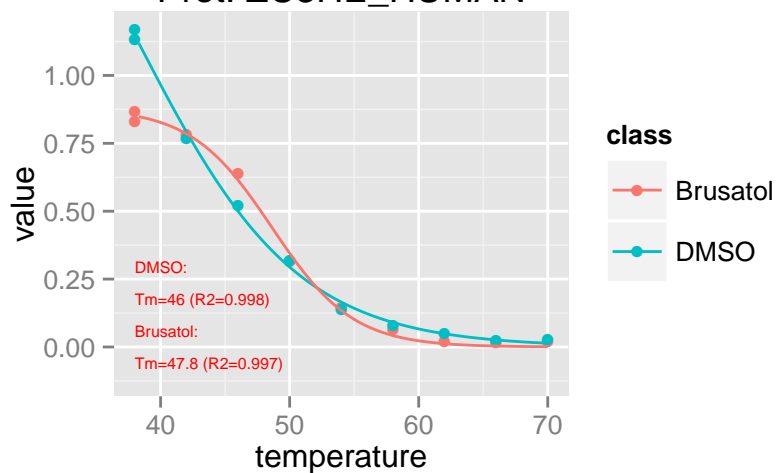

Prot: ZC3HF\_HUMAN

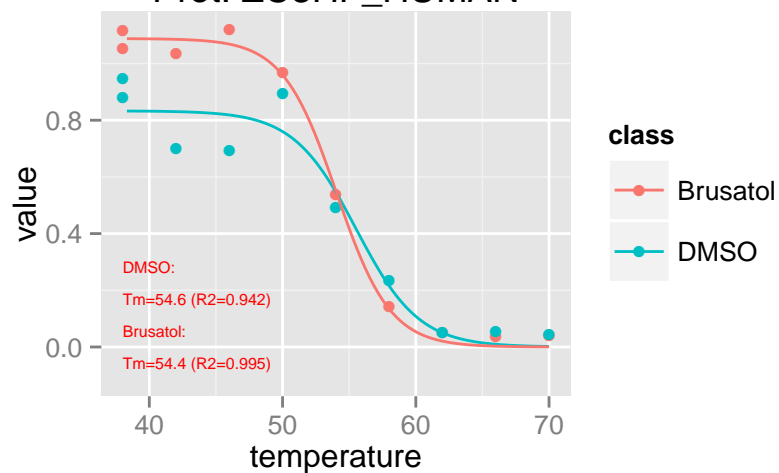

Prot: ZCCHL\_HUMAN

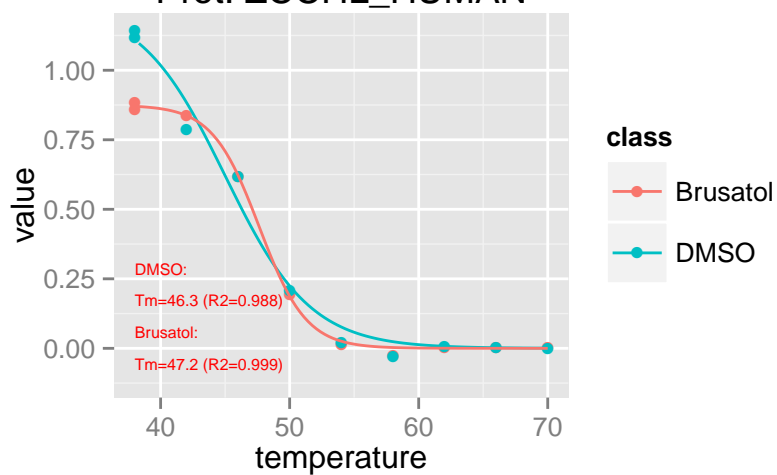

Prot: ZCCHV\_HUMAN

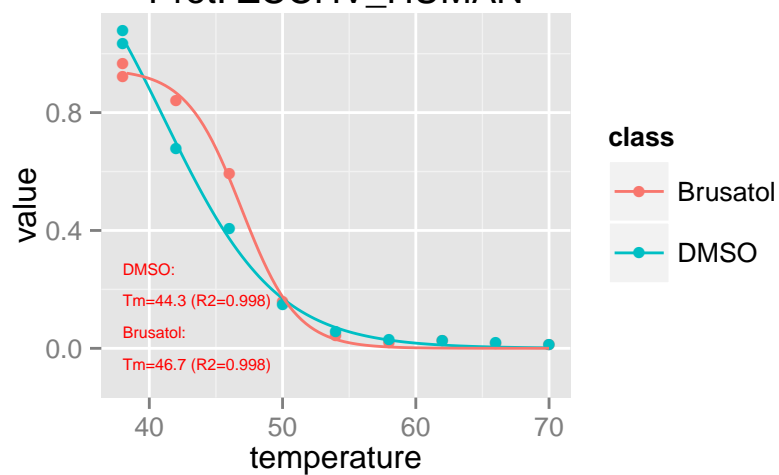

Prot: ZCH18\_HUMAN

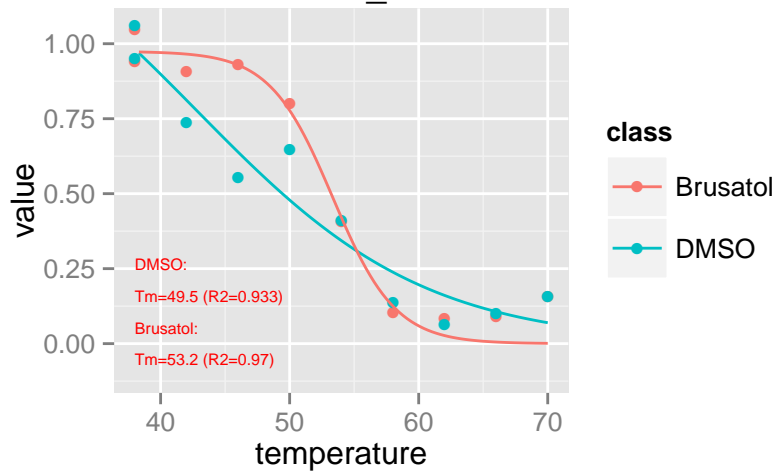

Prot: ZCHC8\_HUMAN

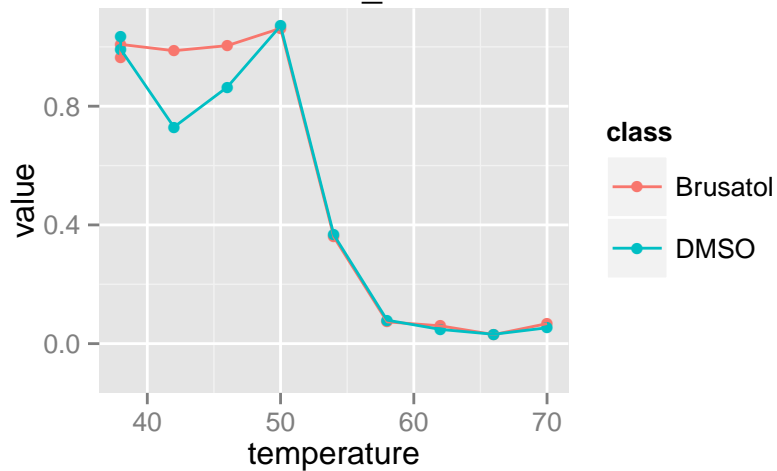

Prot: ZDHC5\_HUMAN

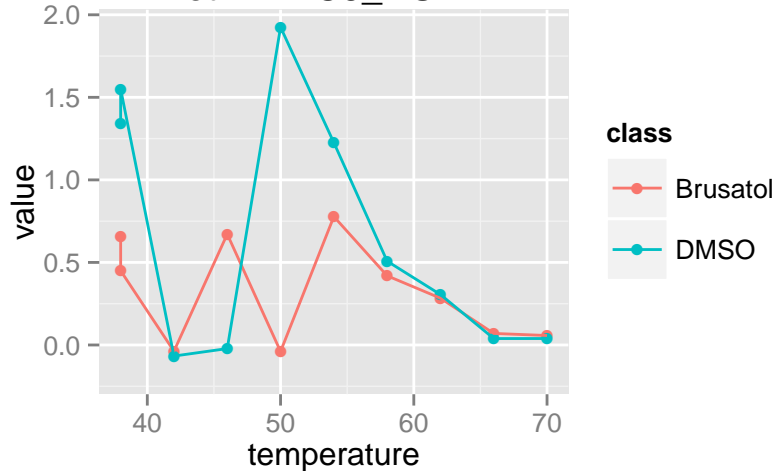

Prot: ZFAN5\_HUMAN

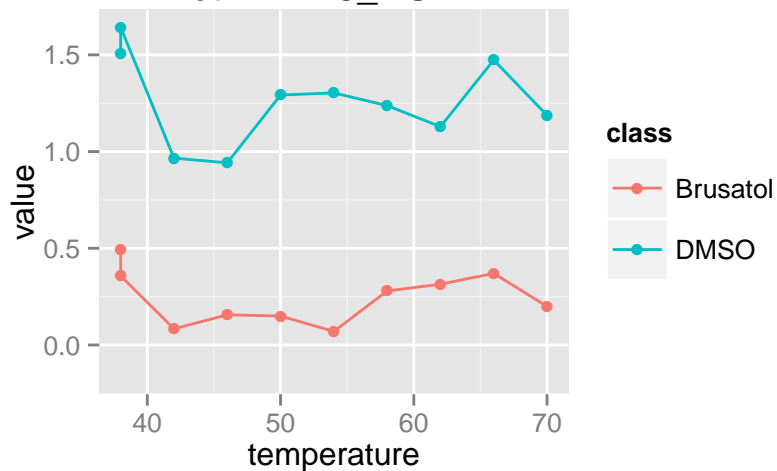

Prot: ZFAN6\_HUMAN

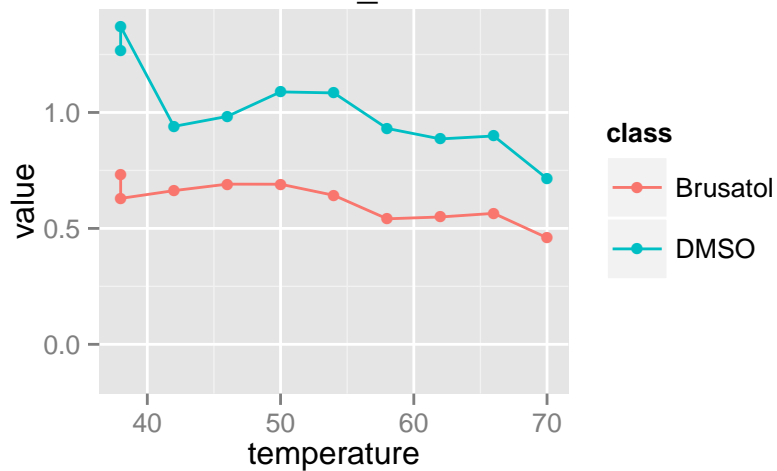

Prot: ZFN2B\_HUMAN

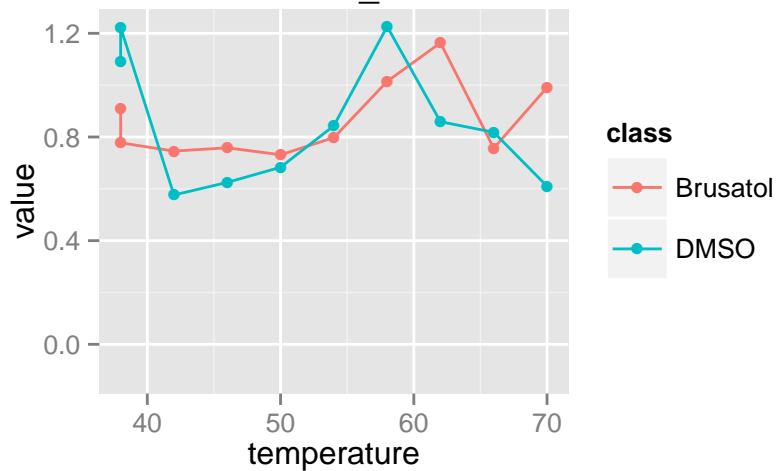

Prot: ZFP91\_HUMAN

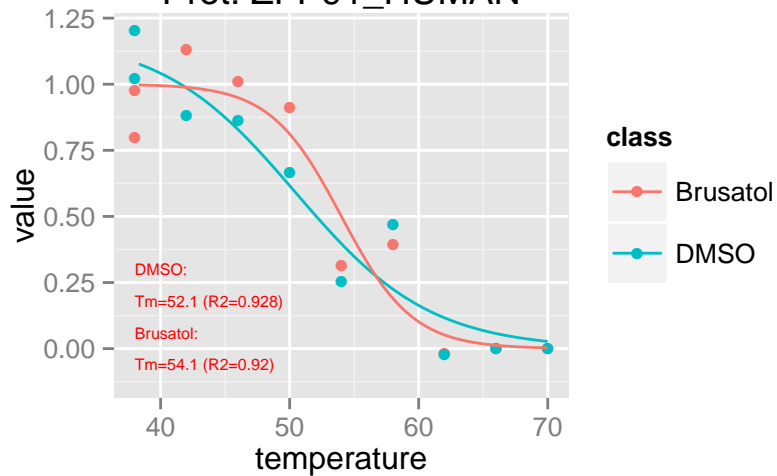

Prot: ZFR\_HUMAN

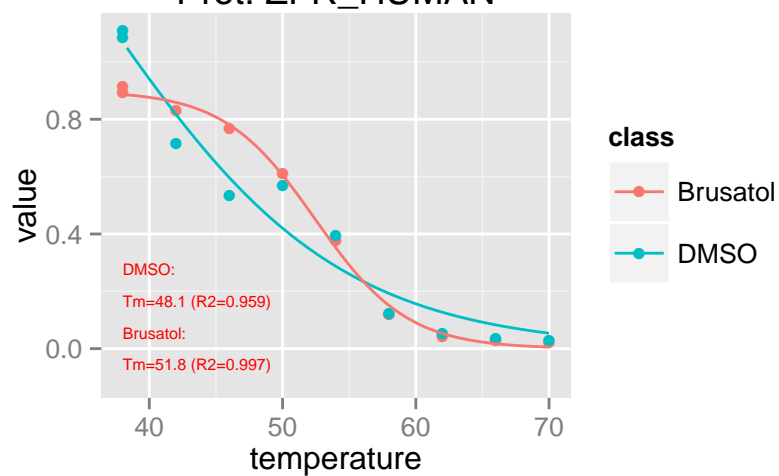

Prot: ZFY16\_HUMAN

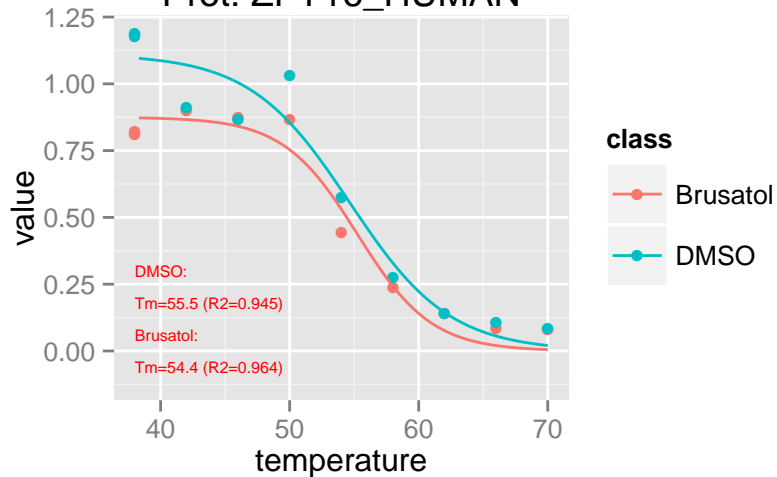

Prot: ZFY19\_HUMAN

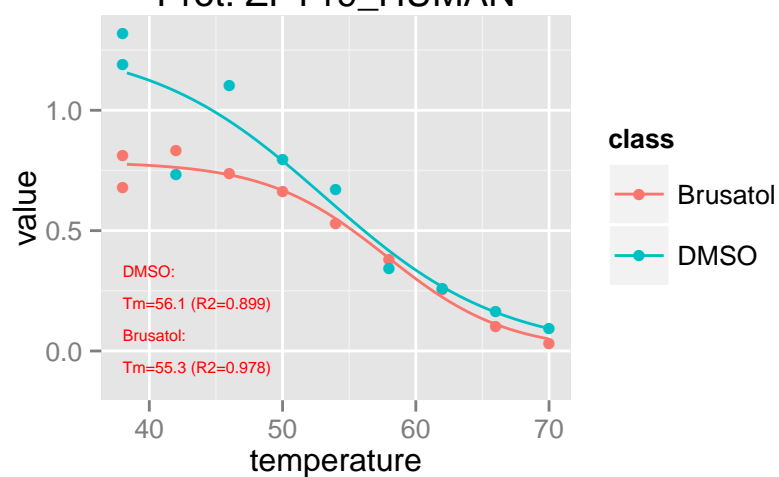

Prot: ZMAT2\_HUMAN

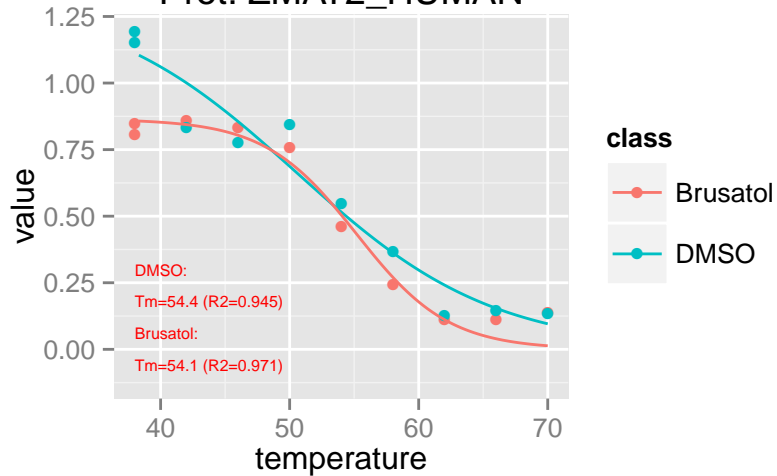

Prot: ZMIZ1\_HUMAN

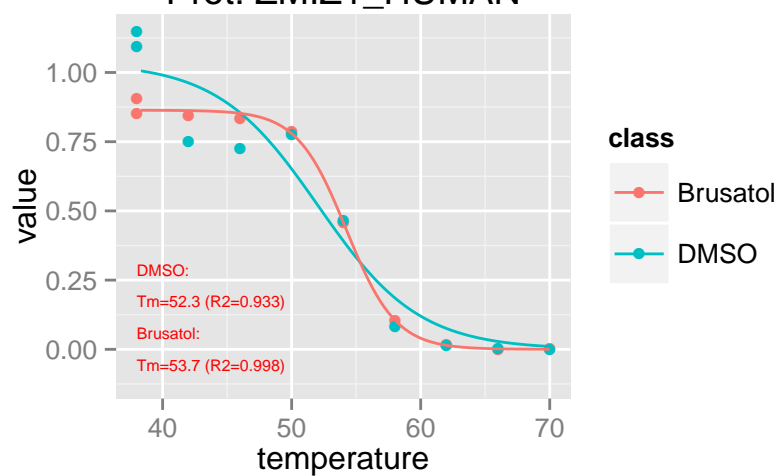

Prot: ZMYM3\_HUMAN

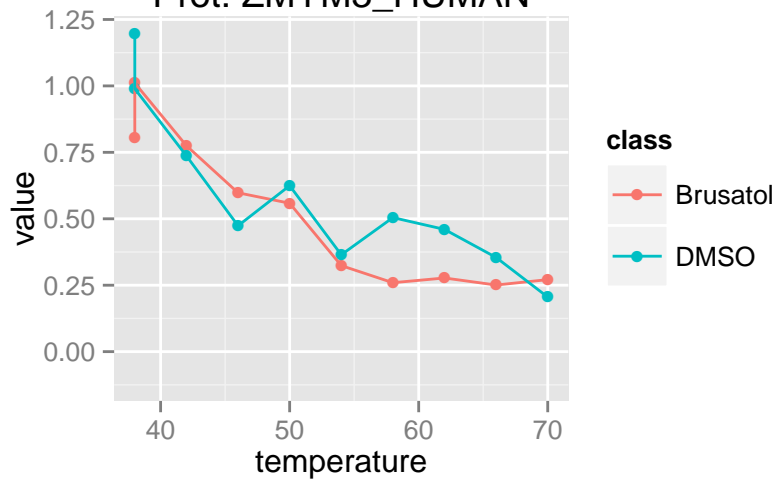

Prot: ZN185\_HUMAN

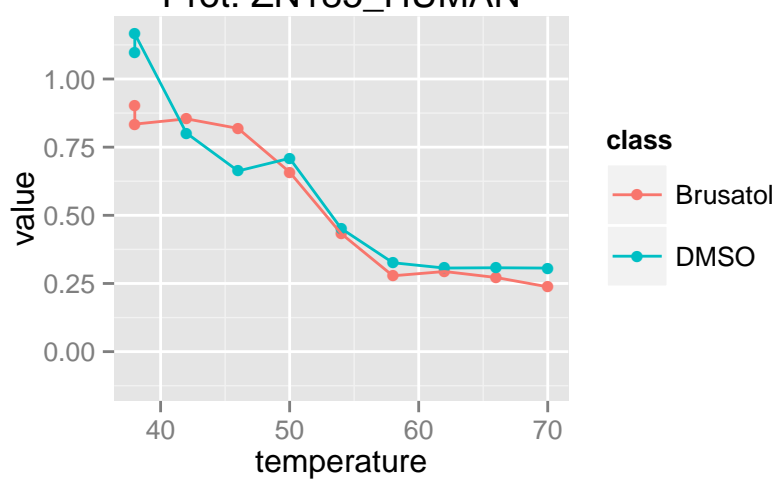

Prot: ZN207\_HUMAN

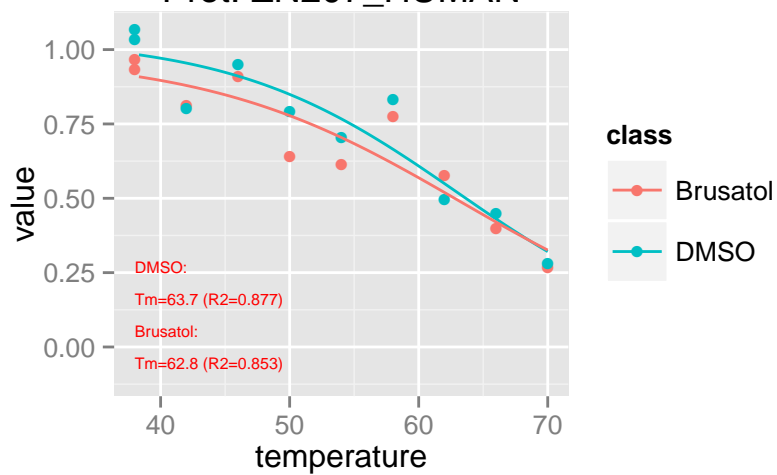

Prot: ZN326\_HUMAN

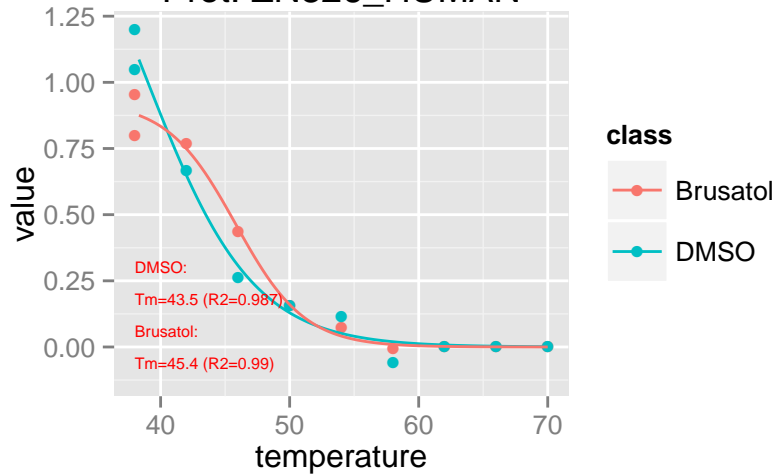

Prot: ZN330\_HUMAN

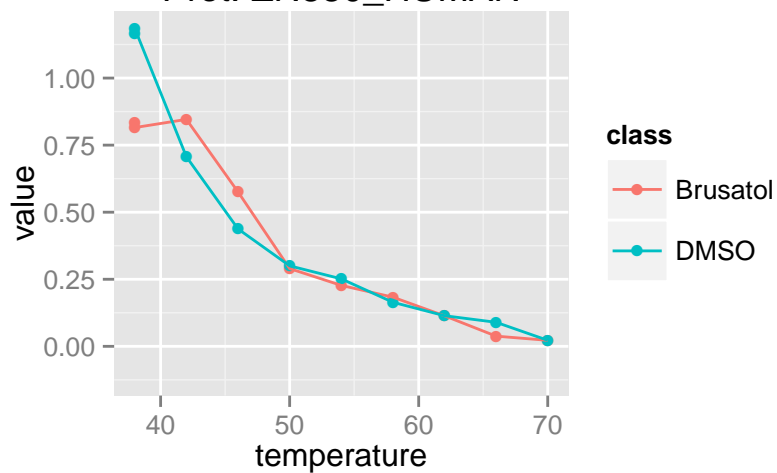

Prot: ZN428\_HUMAN

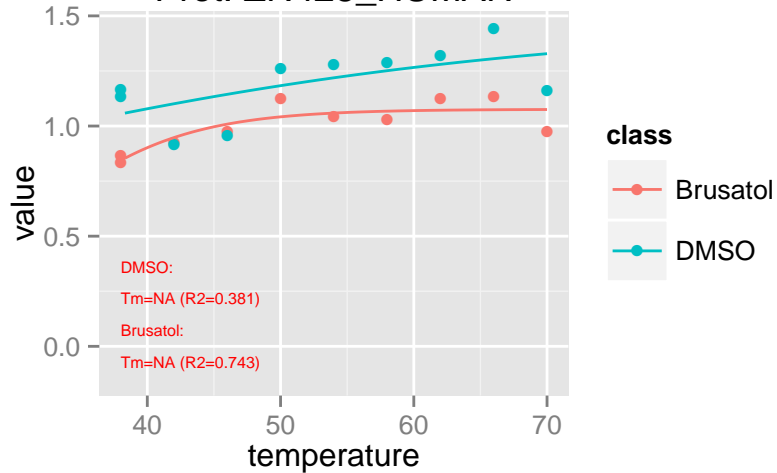

Prot: ZN579\_HUMAN

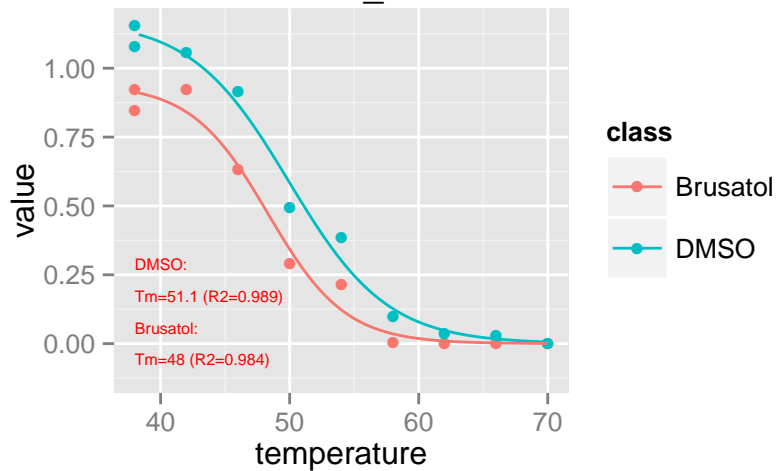

Prot: ZN598\_HUMAN

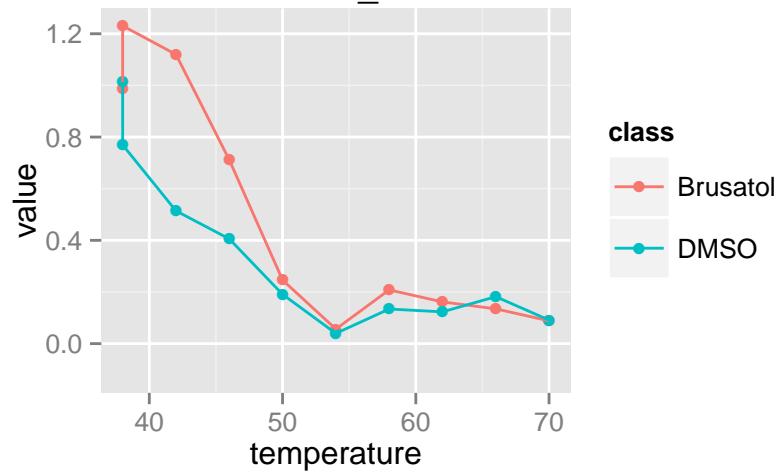

Prot: ZN609\_HUMAN

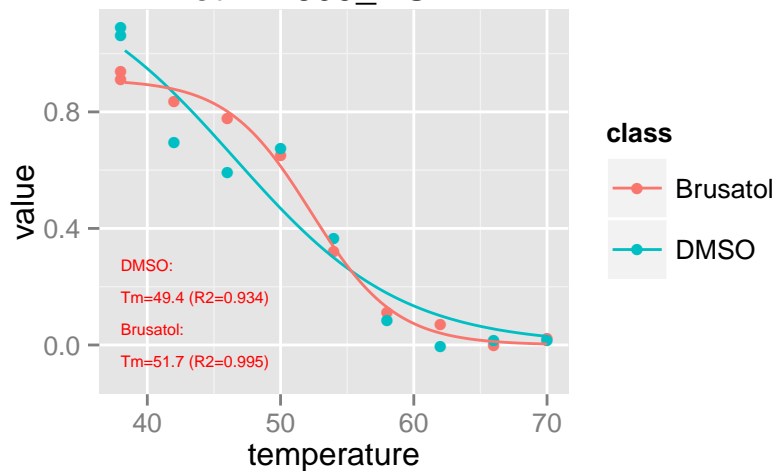

Prot: ZN622\_HUMAN

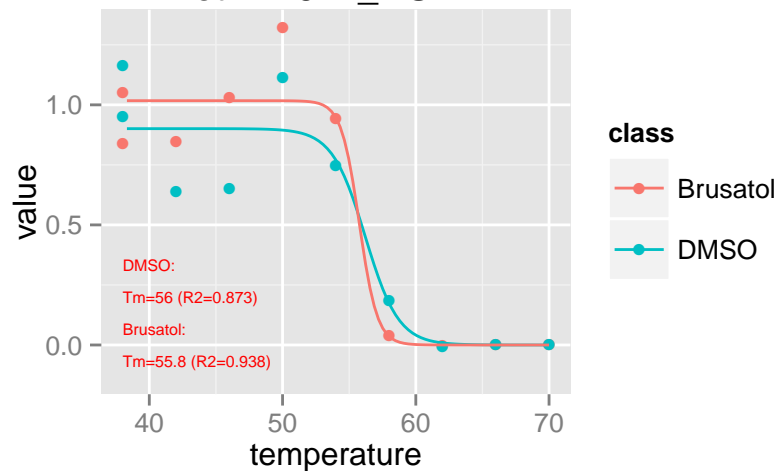

Prot: ZN638\_HUMAN

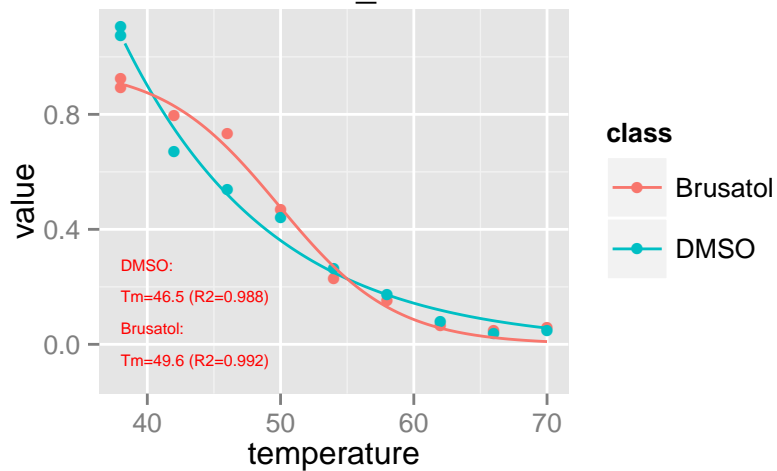

Prot: ZN706\_HUMAN

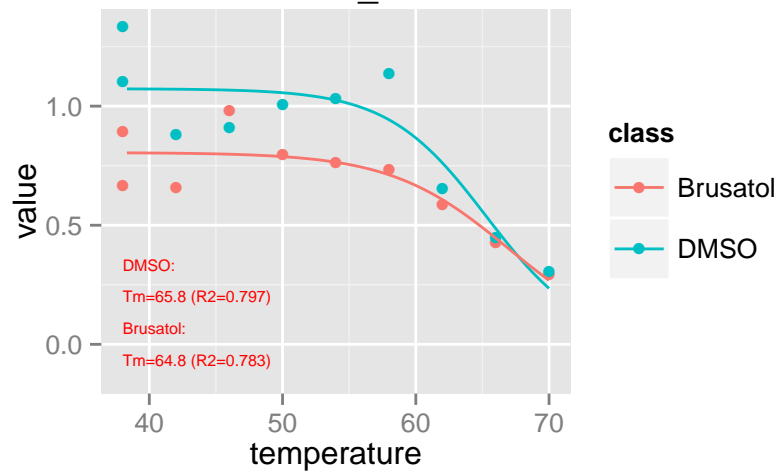

Prot: ZN787\_HUMAN

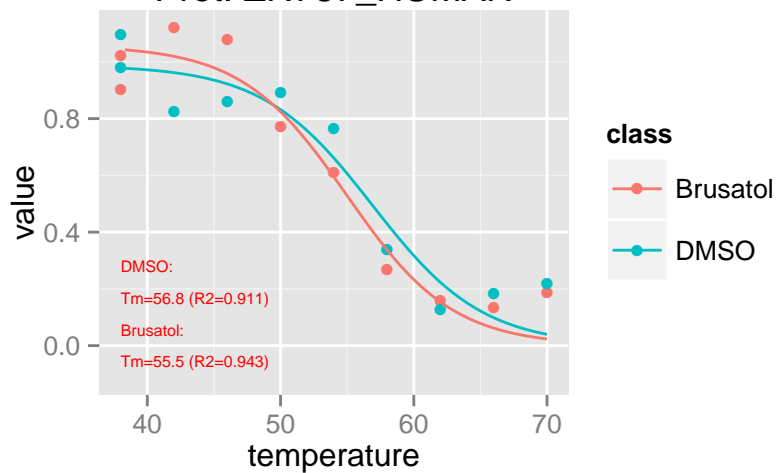

Prot: ZN830\_HUMAN

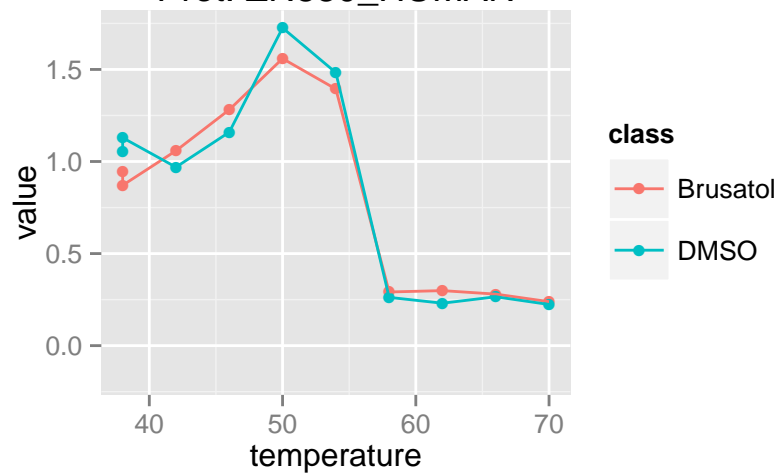

Prot: ZNHI2\_HUMAN

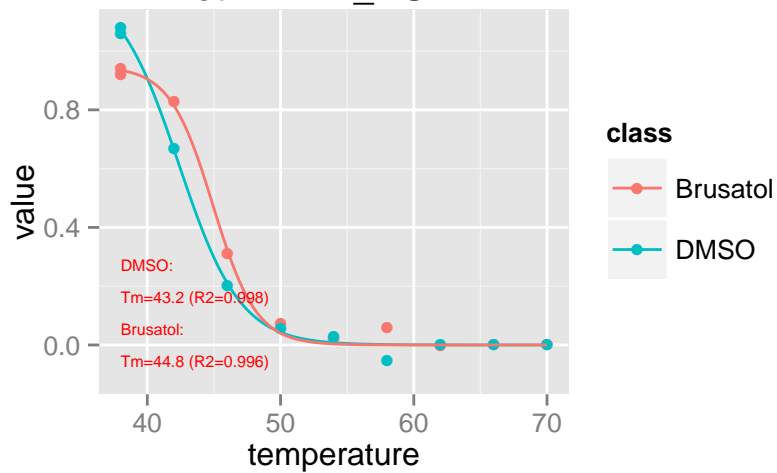

Prot: ZO1\_HUMAN

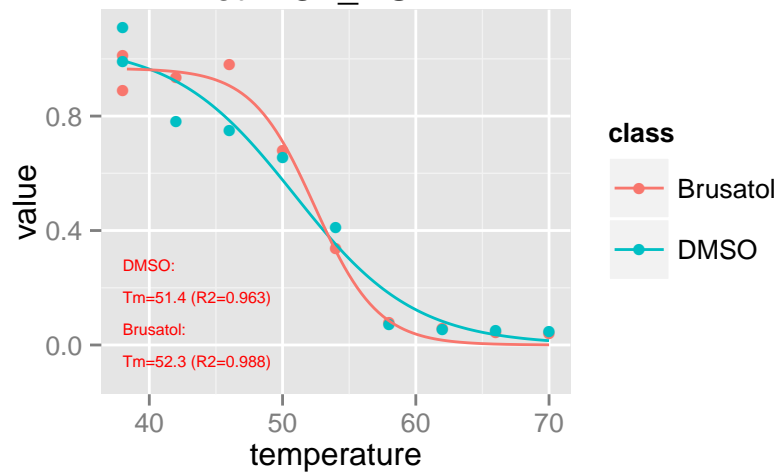

Prot: ZPR1\_HUMAN

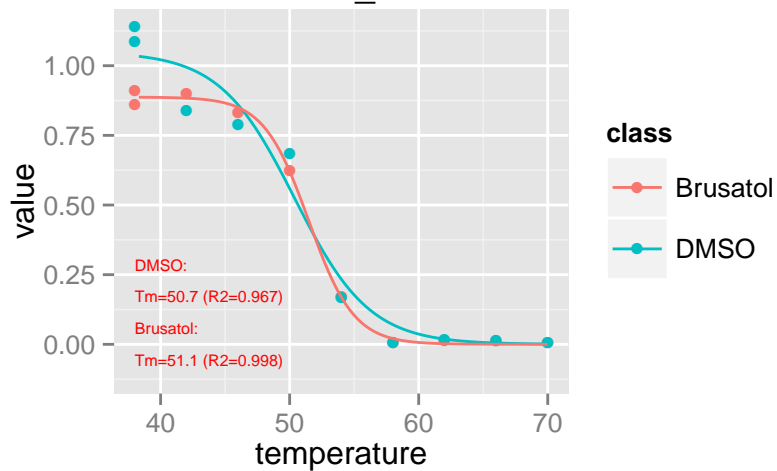

Prot: ZRAB2\_HUMAN

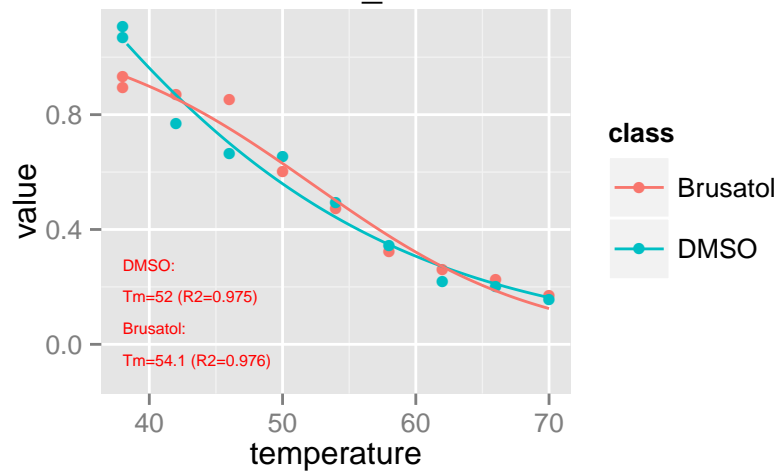



Prot: ZW10\_HUMAN

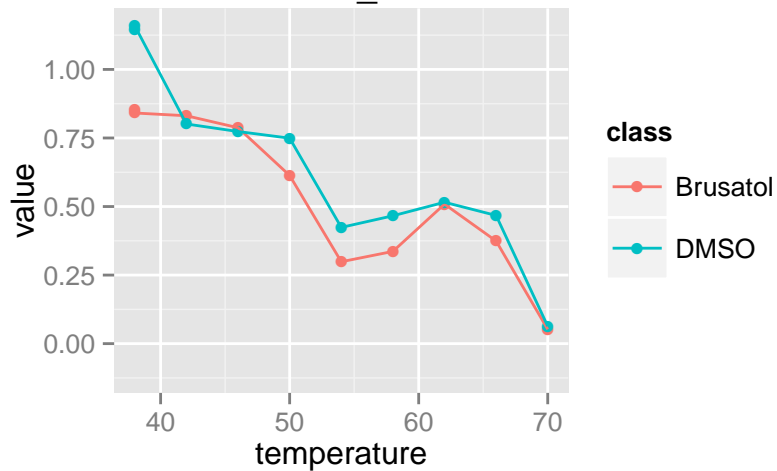

Prot: ZWILC\_HUMAN

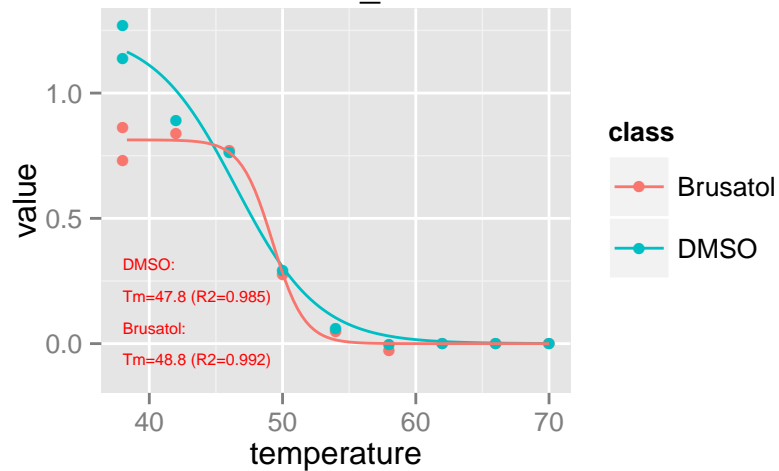

Prot: ZWINT\_HUMAN

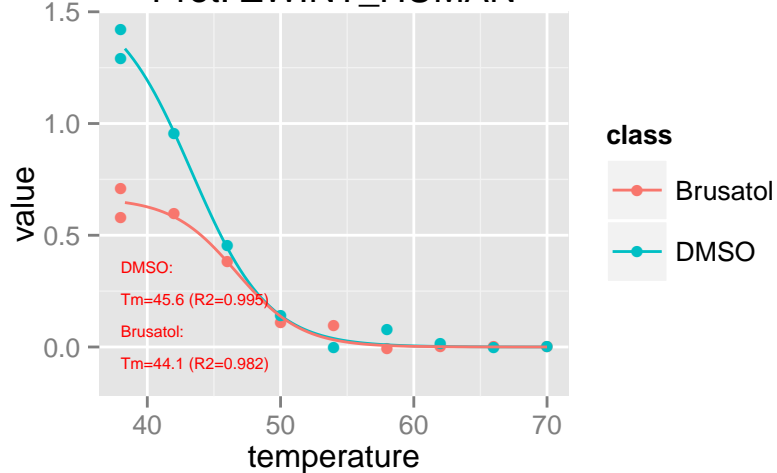

Prot: ZYX\_HUMAN

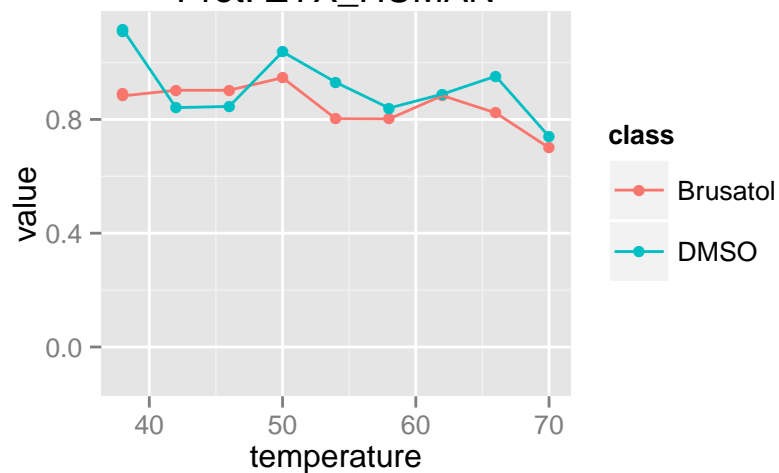

Prot: ZZEF1\_HUMAN

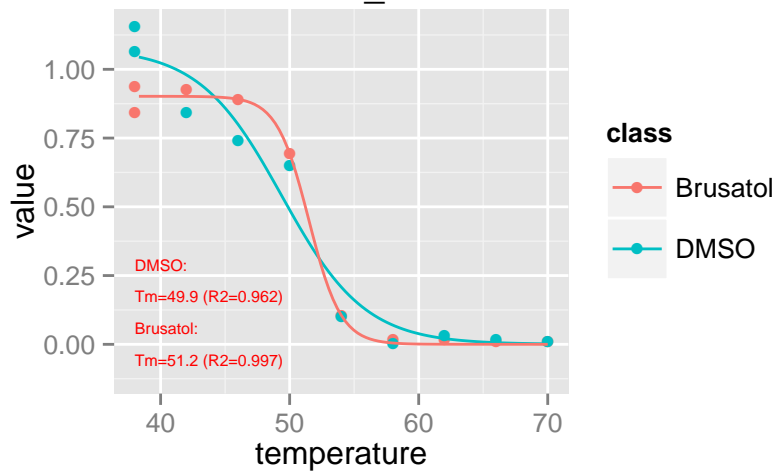

Supplement: 10.1074_M115.055509_mcp.M115.055509-6.pdf [file 10.1074_M115.055509_mcp.M115.055509-6.pdf]
