# Supplementary material
Source: PubMed Central journal article supplement (PMC4824851)
Supplement: 10.1074_M115.055509_mcp.M115.055509-7.pdf [file 10.1074_M115.055509_mcp.M115.055509-7.pdf]

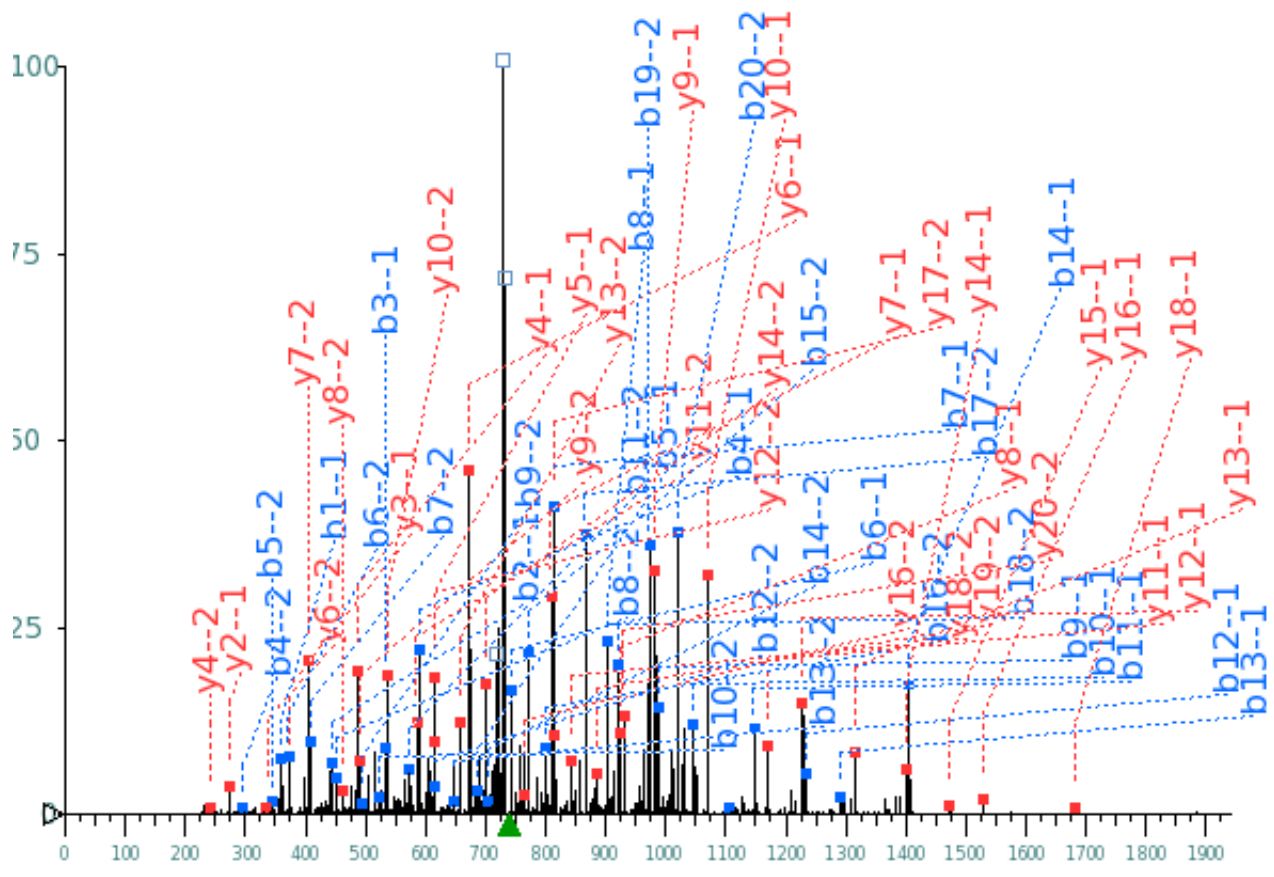

# QSSGPGASSGTSGDHGELVVR (+3)

Primary Reference: E9PL71\_HUMAN

Search ID: 73811

Search Name: 20141113\_QLhumanTMT6lowres\_Obj14178\_CETSA\_1103\_Set2\_Fraction\_01\_2pct

Scan#: 13968

Observed Mass: 738.7035 (0.5 ppm)

PSM Score: 108.43

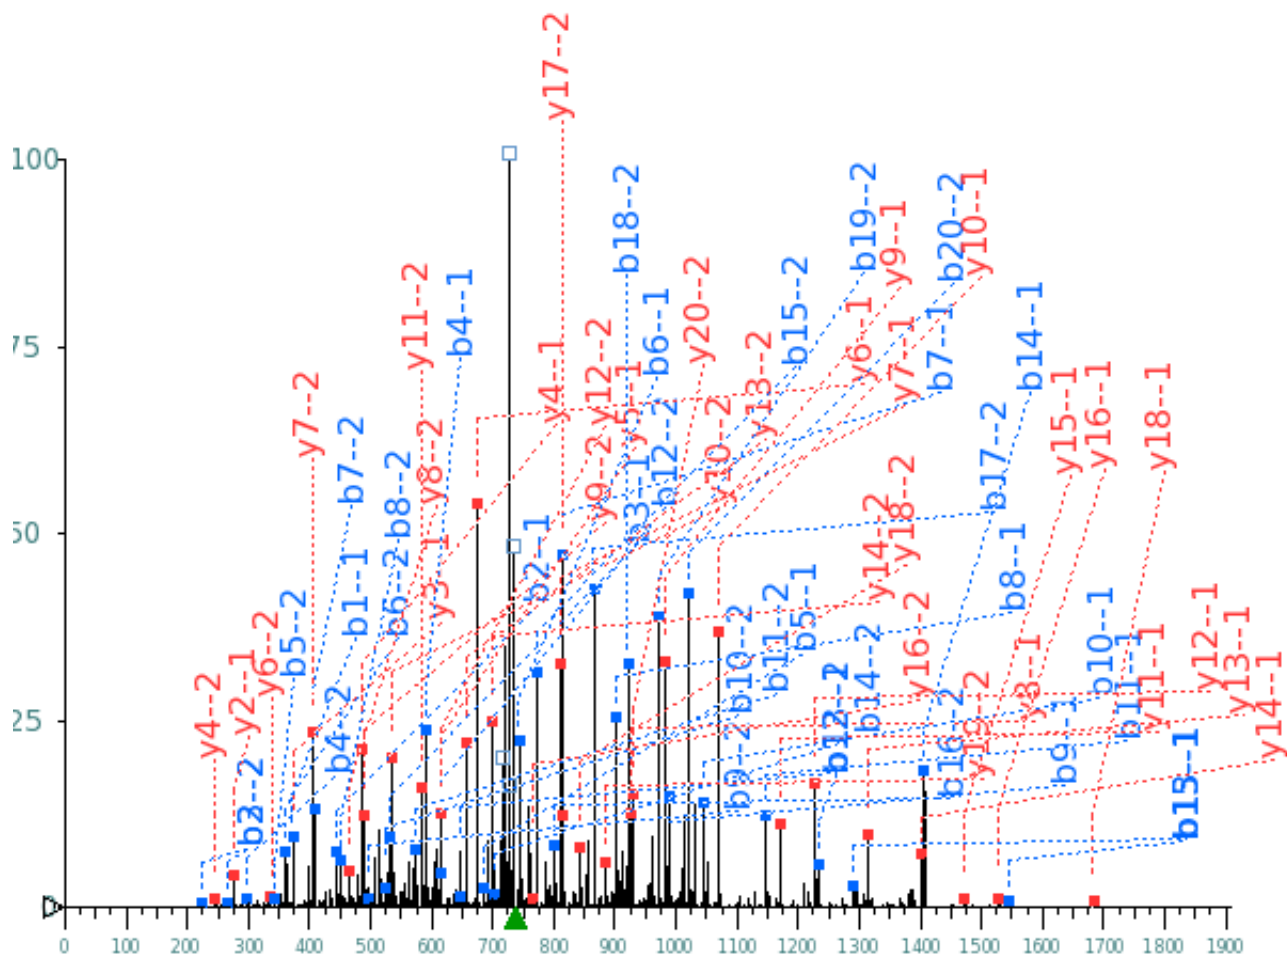

# QSSGPGASSGTSGDHGELVVR (+3)

Primary Reference: E9PL71\_HUMAN

Search ID: 73819

Search Name: 20141113\_QLhumanTMT6lowres\_Obj14178\_CETSA\_1103\_Set2\_Fraction\_02

Scan#: 12533

Observed Mass: 738.702 (-1.5 ppm)

PSM Score: 88.2

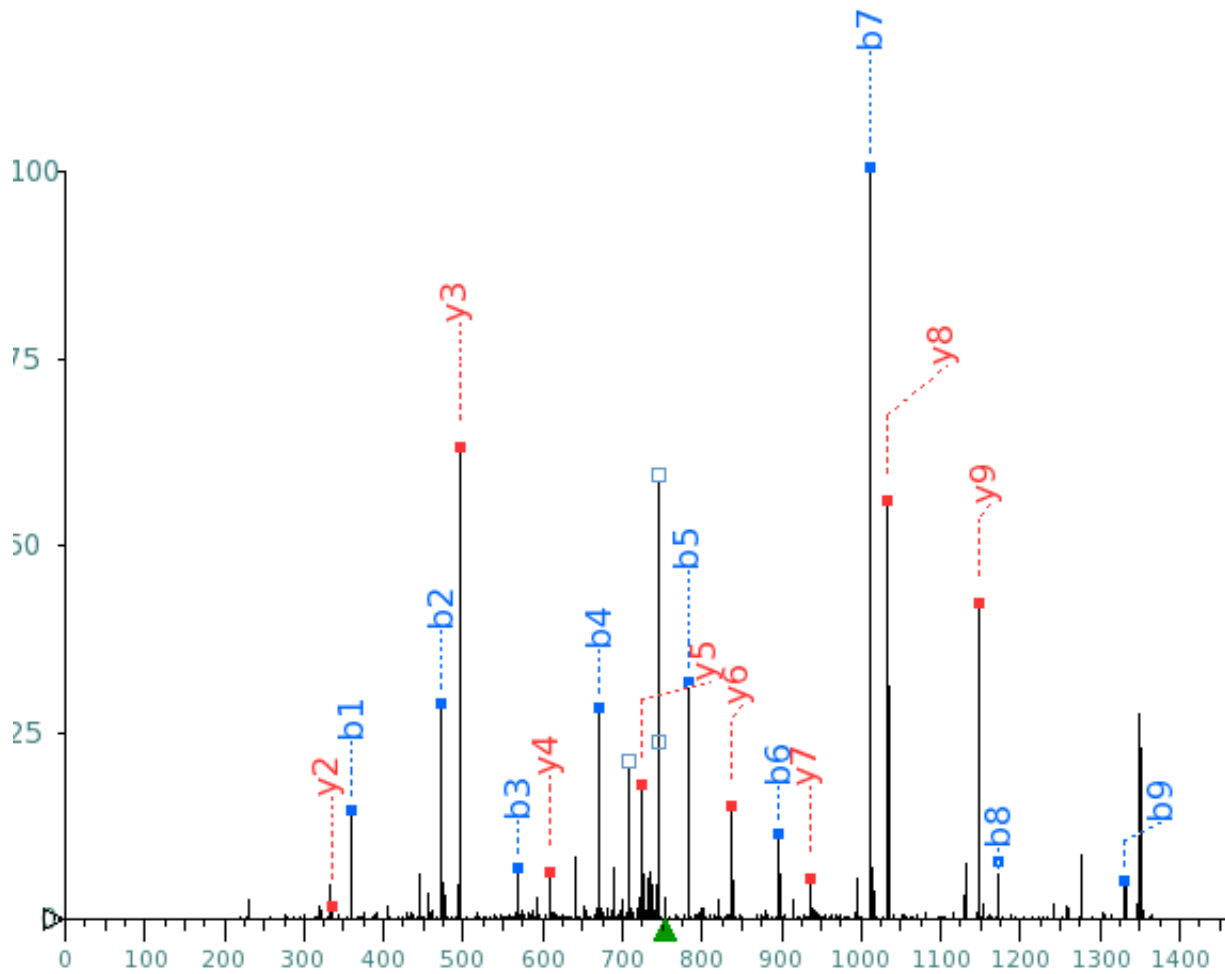

# ENPVINDCCR (+2)

Primary Reference: F115A\_HUMAN

Search ID: 73819

Search Name: 20141113\_QLhumanTMT6lowres\_Obj14178\_CETSA\_1103\_Set2\_Fraction\_02

Scan#: 14274

Observed Mass: 753.3533 (-2.9 ppm)

PSM Score: 39.17

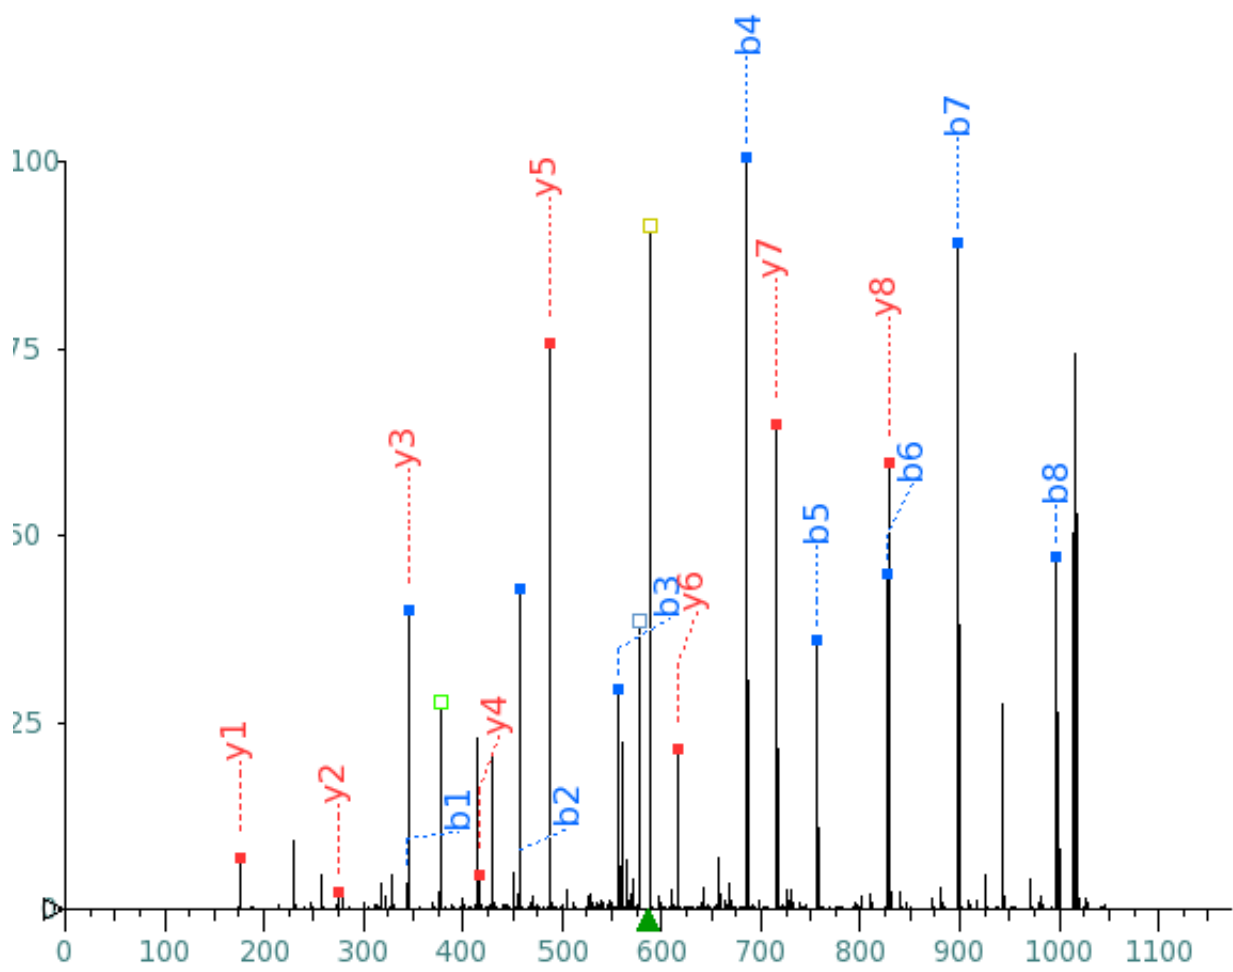

# NIVEAAVR (+2)

Primary Reference: RS26L\_HUMAN

Search ID: 73819

Search Name: 20141113\_QLhumanTMT6lowres\_Obj14178\_CETSA\_1103\_Set2\_Fraction\_02

Scan#: 17682

Observed Mass: 586.352 (-2.4 ppm)

PSM Score: 48.33

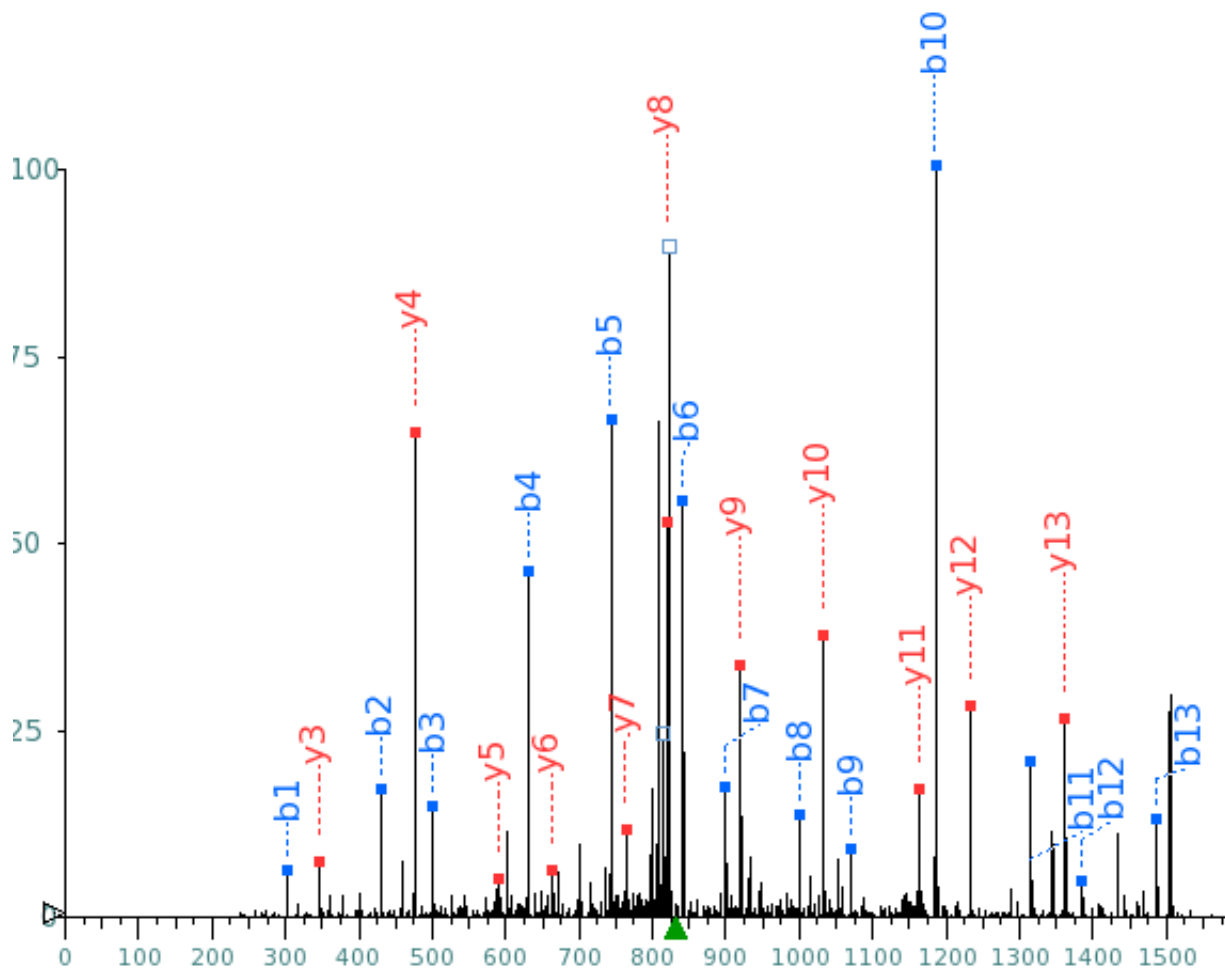

# AQAELVGTAEATR (+2)

Primary Reference: ATPD\_HUMAN

Search ID: 73819

Search Name: 20141113\_QLhumanTMT6lowres\_Obj14178\_CETSA\_1103\_Set2\_Fraction\_02

Scan#: 18917

Observed Mass: 830.9372 (-1.9 ppm)

PSM Score: 69.89

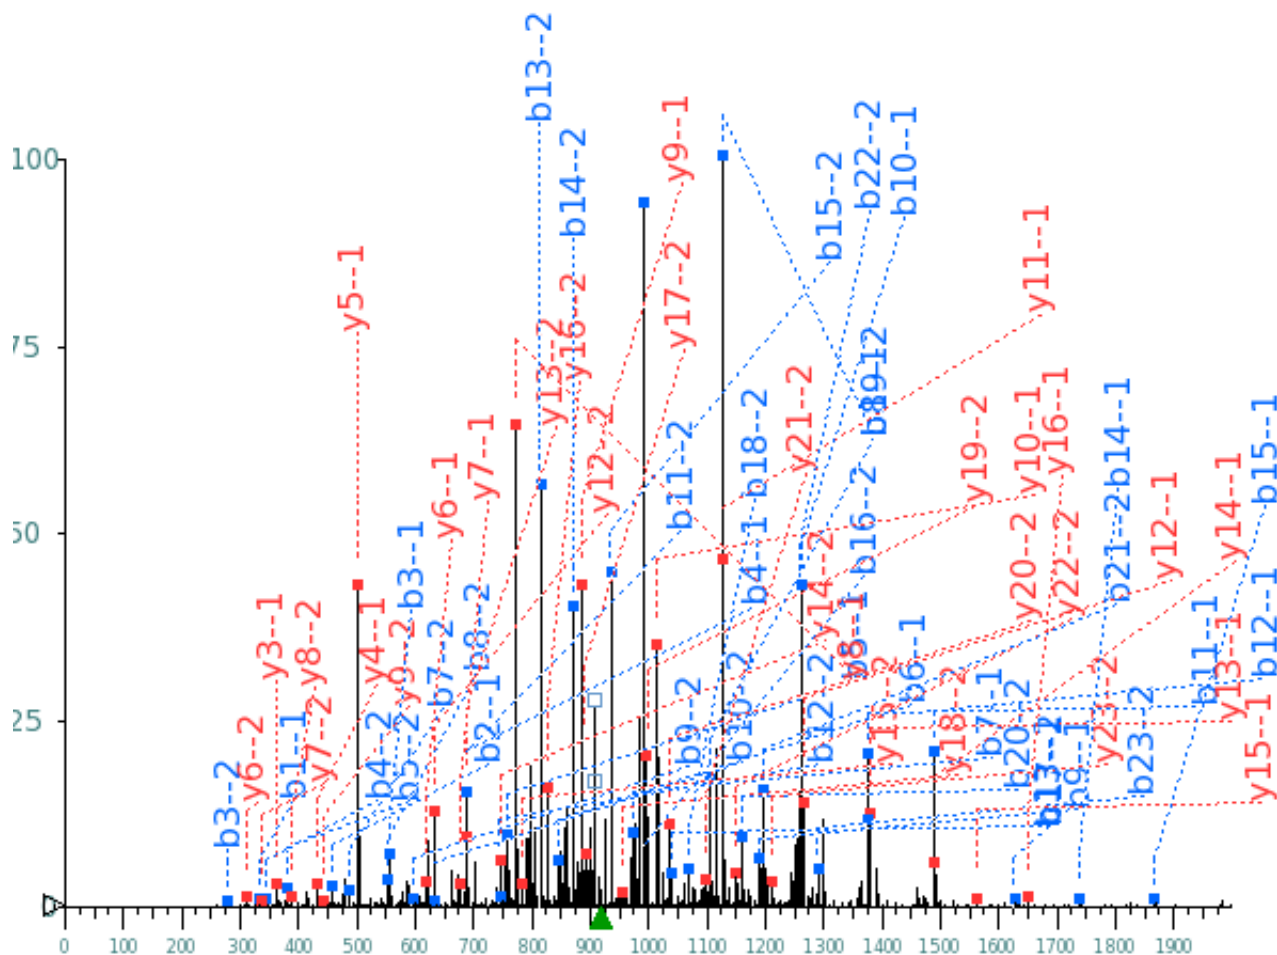

# TQVEASEESALNHLQNP GDAAEGR (+3)

Primary Reference: MOFA1\_HUMAN

Search ID: 73819

Search Name: 20141113\_QLhumanTMT6lowres\_Obj14178\_CETSA\_1103\_Set2\_Fraction\_02

Scan#: 23542

Observed Mass: 918.1141 (-2.1 ppm)

PSM Score: 82.93

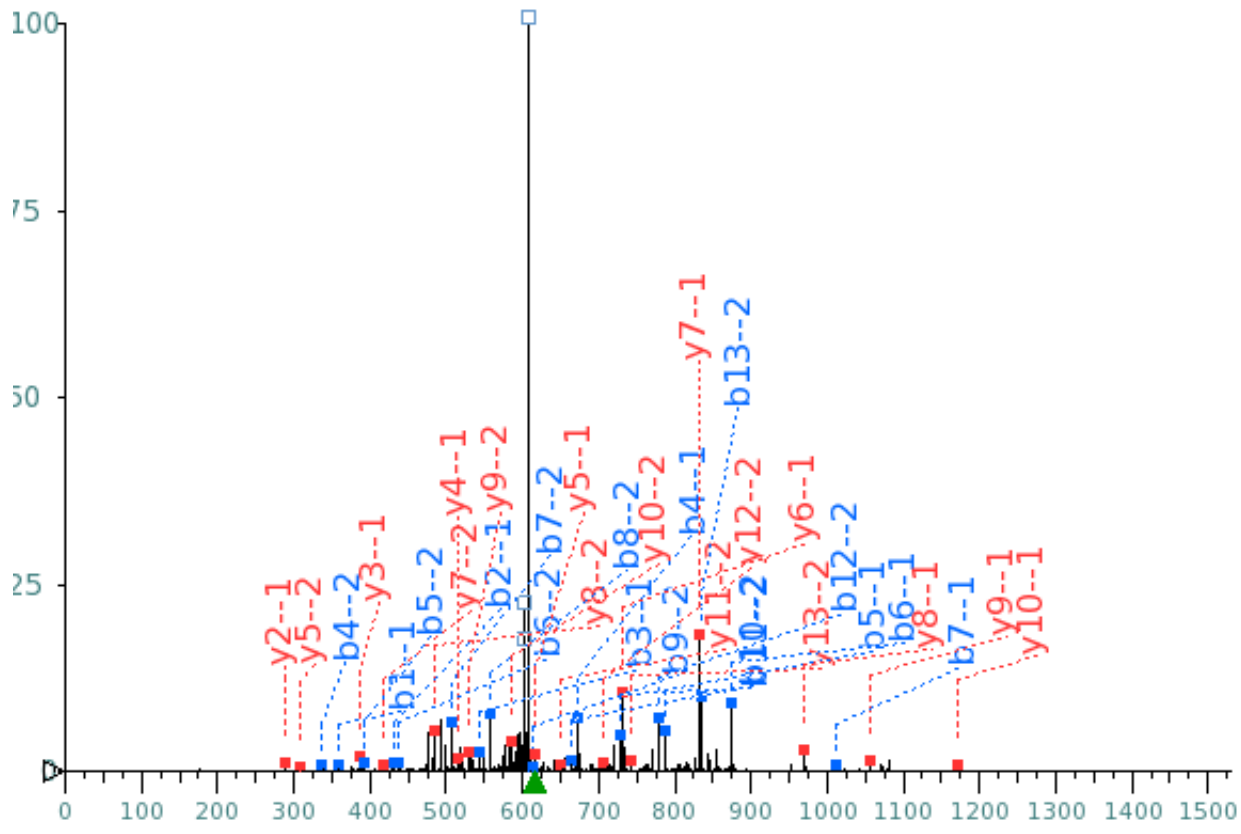

# EALENSHTNTEVLR (+3)

Primary Reference: CHM4C\_HUMAN

Search ID: 73820

Search Name: 20141113\_QLhumanTMT6lowres\_Obj14178\_CETSA\_1103\_Set2\_Fraction\_03

Scan#: 15238

Observed Mass: 614.6549 (-2.9 ppm)

PSM Score: 29.07

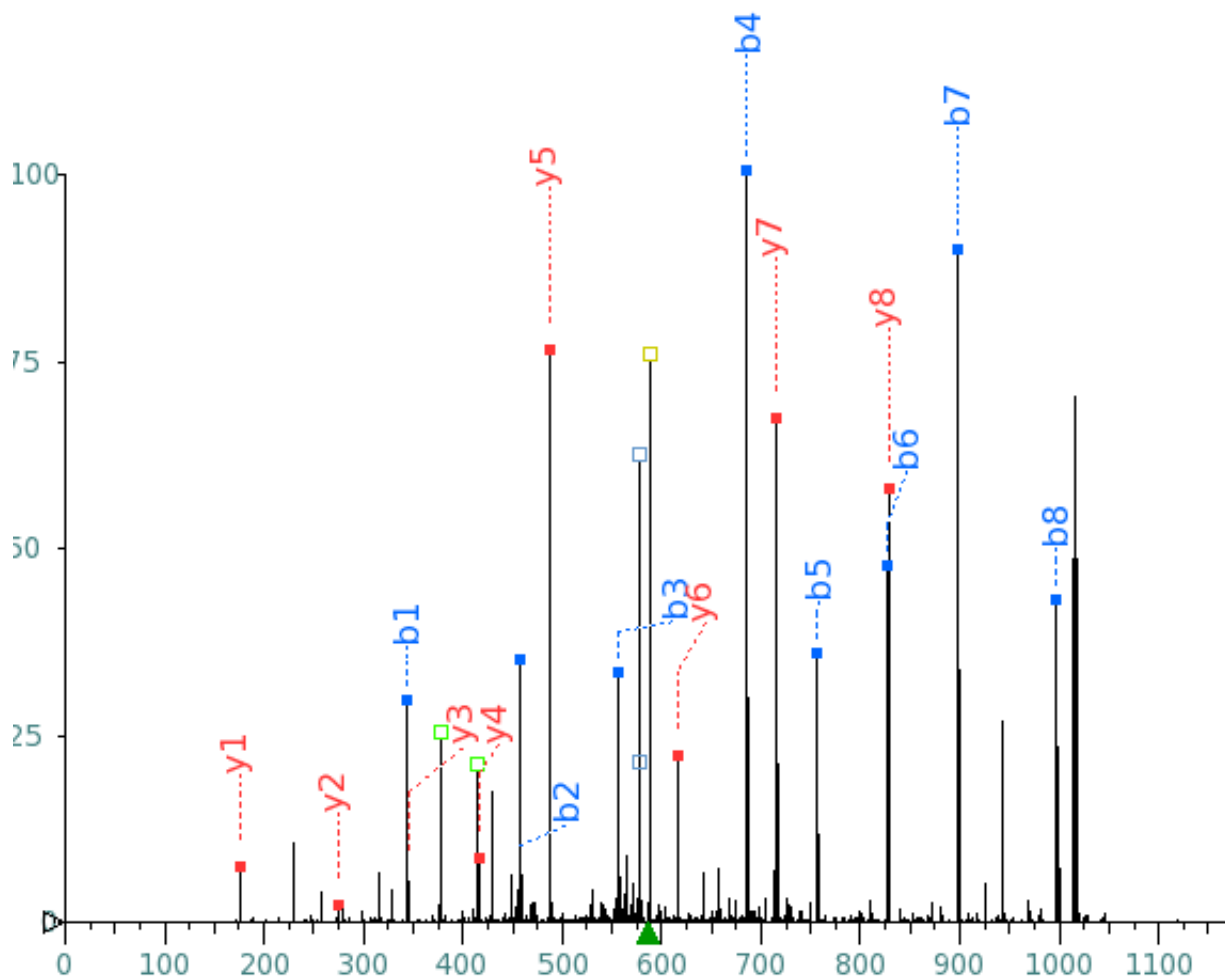

# NIVEAAVR (+2)

Primary Reference: RS26L\_HUMAN

Search ID: 73820

Search Name: 20141113\_QLhumanTMT6lowres\_Obj14178\_CETSA\_1103\_Set2\_Fraction\_03

Scan#: 18420

Observed Mass: 586.3517 (-2.9 ppm)

PSM Score: 45.27



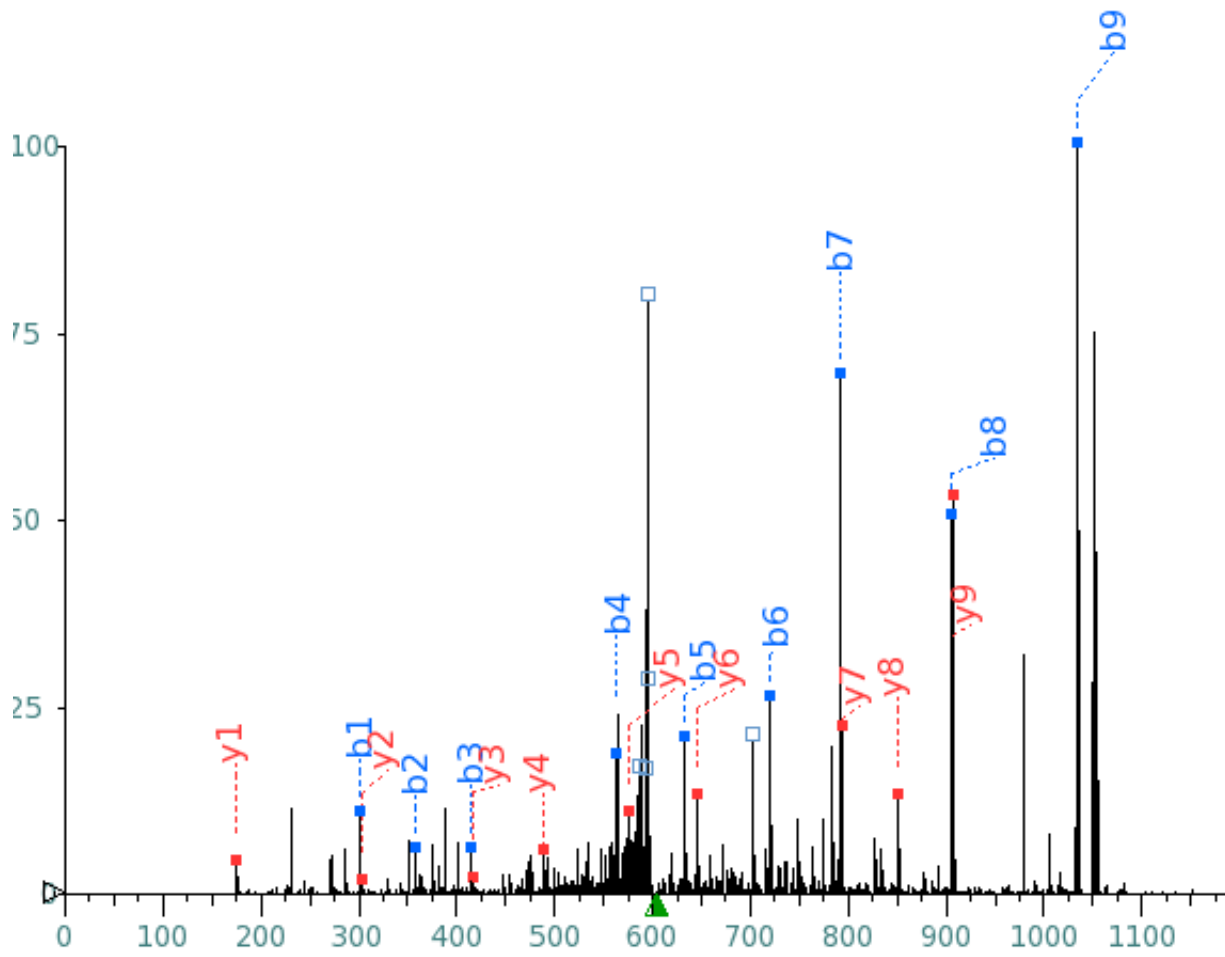

# AGGFASALER (+2)

Primary Reference: RT28\_HUMAN

Search ID: 73820

Search Name: 20141113\_QLhumanTMT6lowres\_Obj14178\_CETSA\_1103\_Set2\_Fraction\_03

Scan#: 20967

Observed Mass: 604.3335 (-2.8 ppm)

PSM Score: 46.39

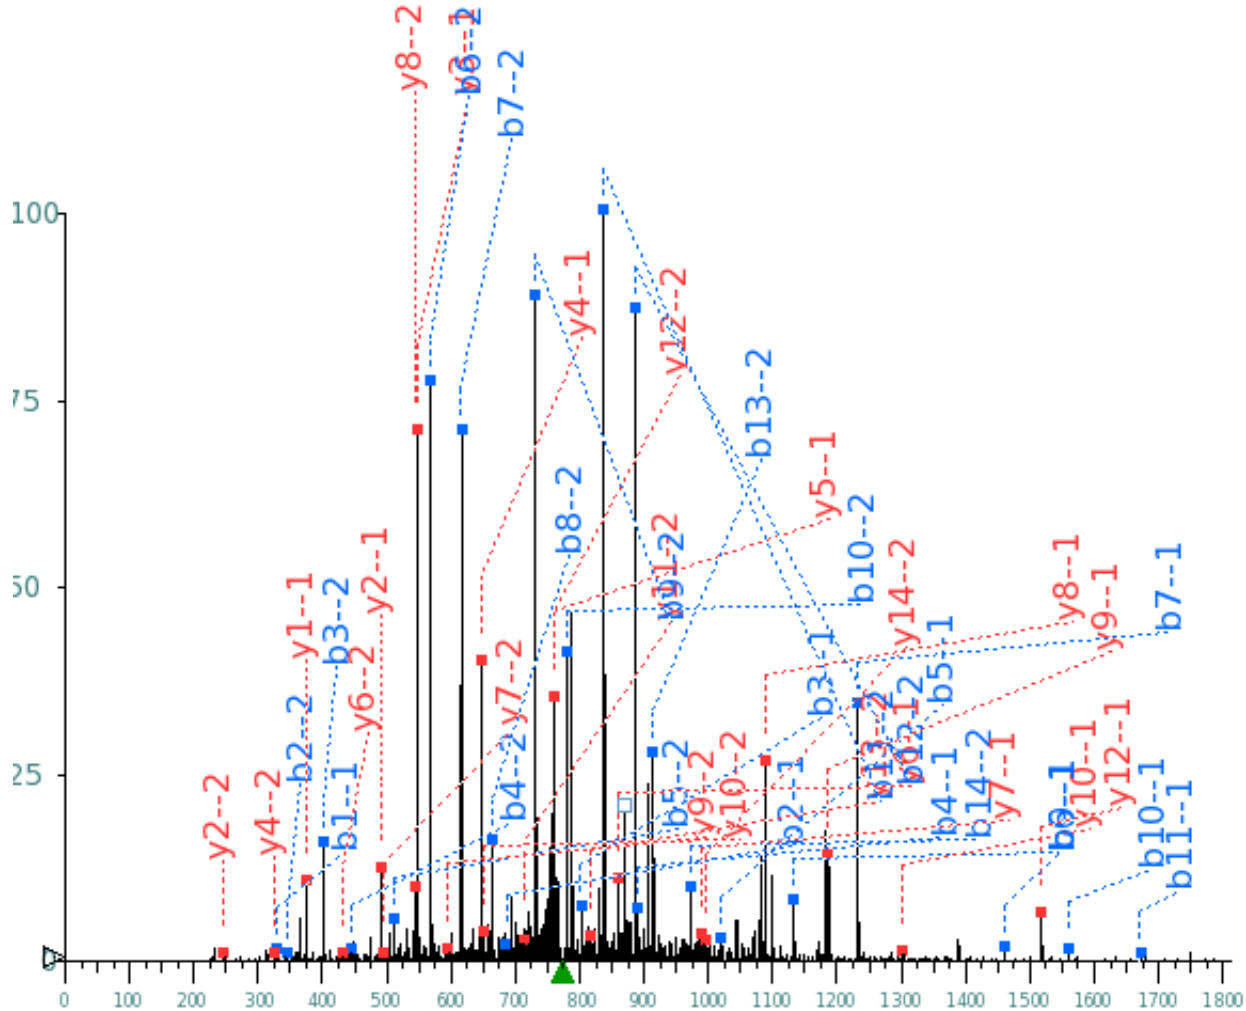

# VKDSEDVPMVLVGNK (+3)

Primary Reference: RASK\_HUMAN

Search ID: 73820

Search Name: 20141113\_QLhumanTMT6lowres\_Obj14178\_CETSA\_1103\_Set2\_Fraction\_03

Scan#: 28557

Observed Mass: 773.1156 (-3.6 ppm)

PSM Score: 46.56

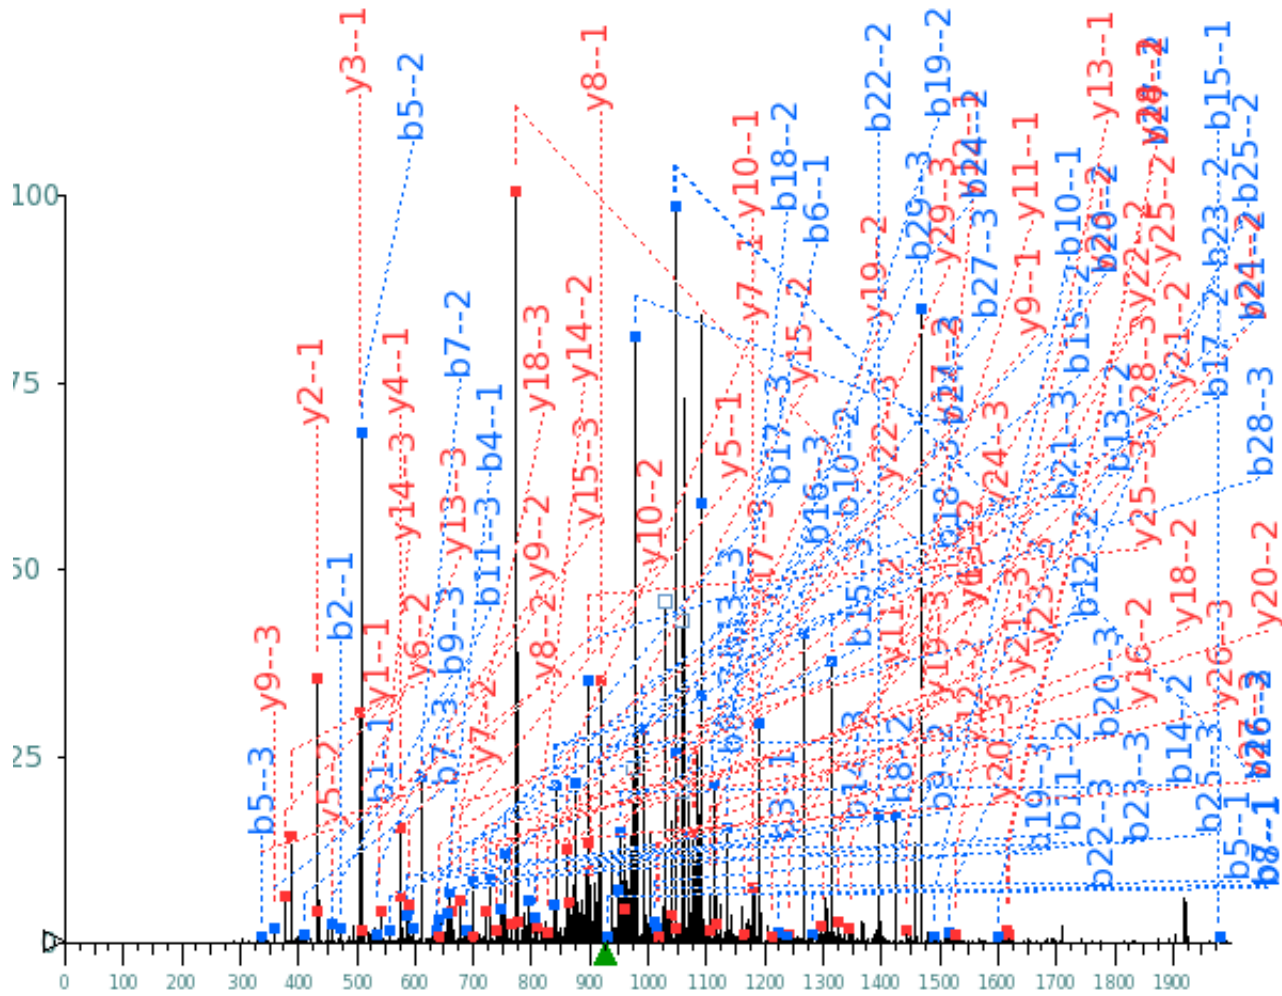

# ELLAKPIGPDDAIDALSSDFTCGSPTAAGK (+4)

Primary Reference: B2RCJ7\_HUMAN

Search ID: 73820

Search Name: 20141113\_QLhumanTMT6lowres\_Obj14178\_CETSA\_1103\_Set2\_Fraction\_03

Scan#: 40936

Observed Mass: 926.9948 (-2.4 ppm)

PSM Score: 42.23

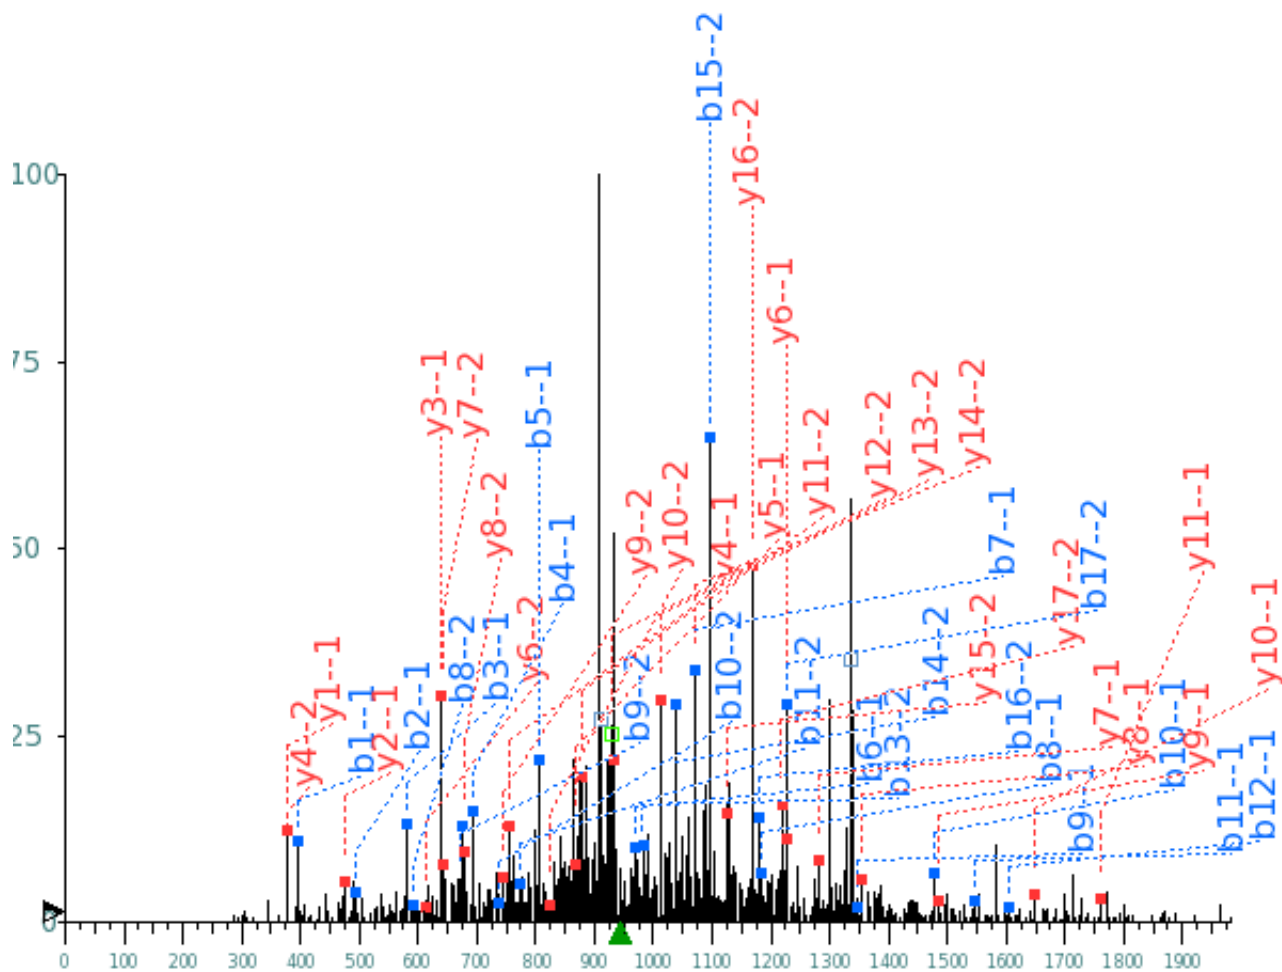

# YVSLIYTNYEAGKDDYVK (+3)

Primary Reference: C7DJS2\_HUMAN

Search ID: 73849

Search Name: 20141113\_QLhumanTMT6lowres\_Obj14178\_CETSA\_1103\_Set2\_Fraction\_04

Scan#: 32863

Observed Mass: 943.5138 (-2 ppm)

PSM Score: 28.17

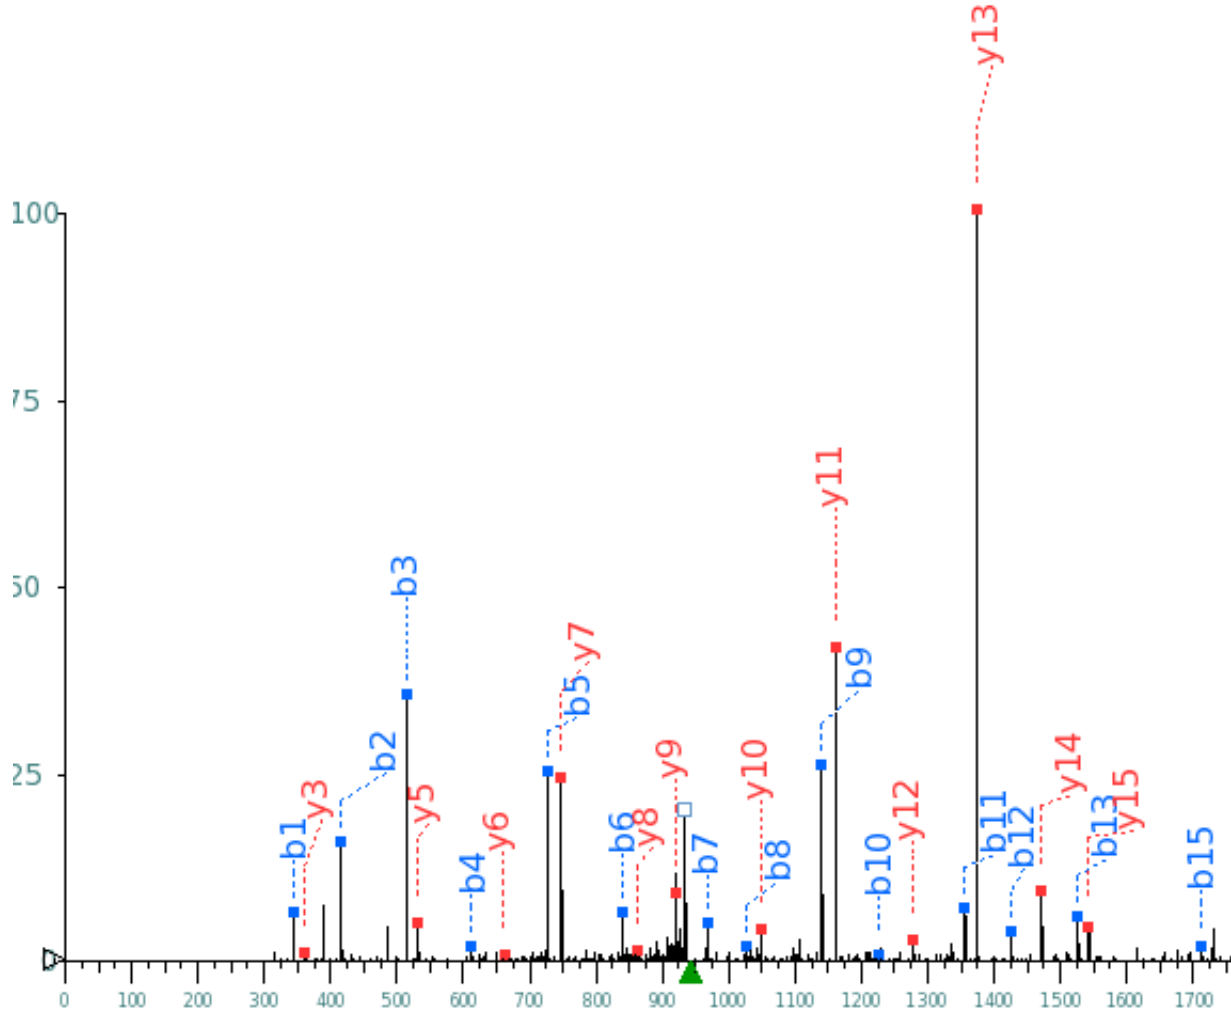

# NAVPDIQGDSEAVSVR (+2)

Primary Reference: IPKG\_HUMAN

Search ID: 73850

Search Name: 20141113\_QLhumanTMT6lowres\_Obj14178\_CETSA\_1103\_Set2\_Fraction\_05

Scan#: 23088

Observed Mass: 943.4922 (-2.4 ppm)

PSM Score: 62.25

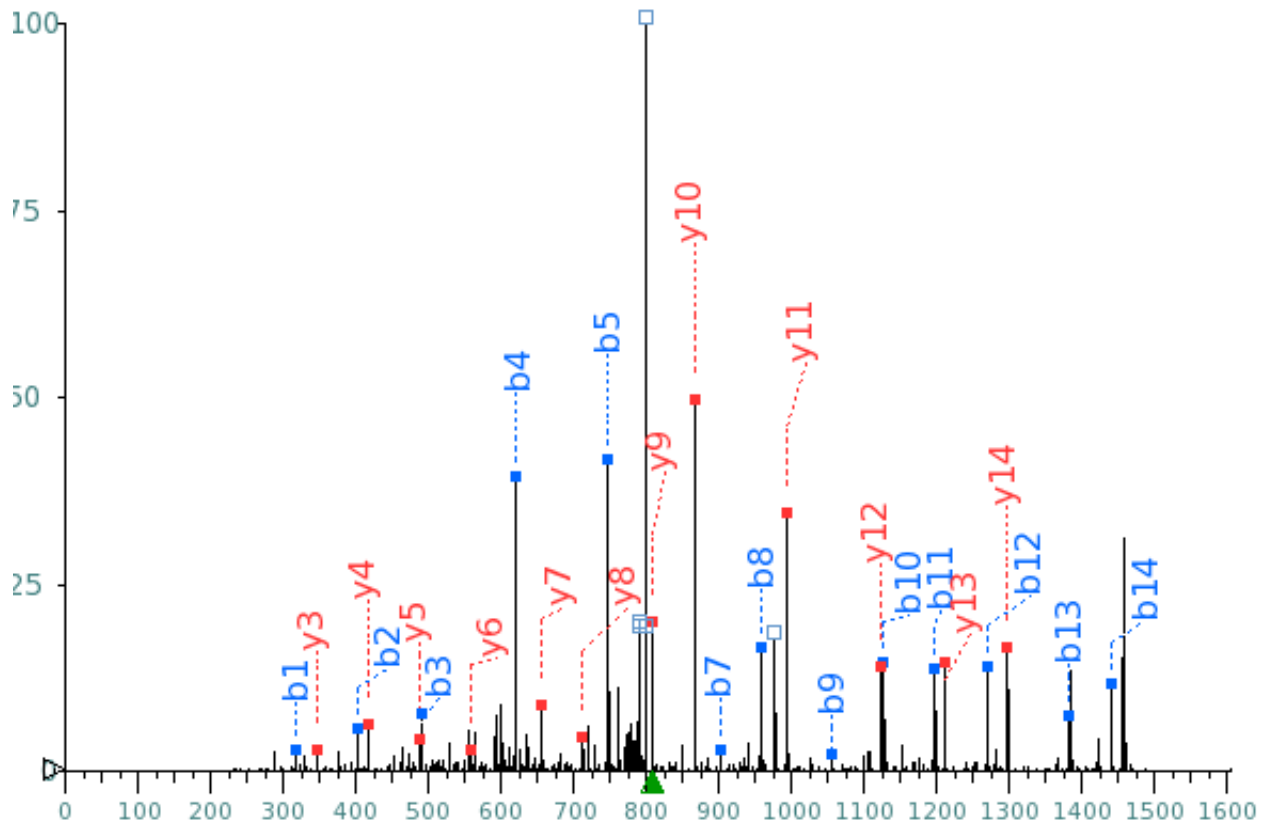

# SSSEQGPGPAAALGR (+2)

Primary Reference: DNLZ\_HUMAN

Search ID: 73851

Search Name: 20141113\_QLhumanTMT6lowres\_Obj14178\_CETSA\_1103\_Set2\_Fraction\_06

Scan#: 15111

Observed Mass: 807.4239 (-2.5 ppm)

PSM Score: 75.22

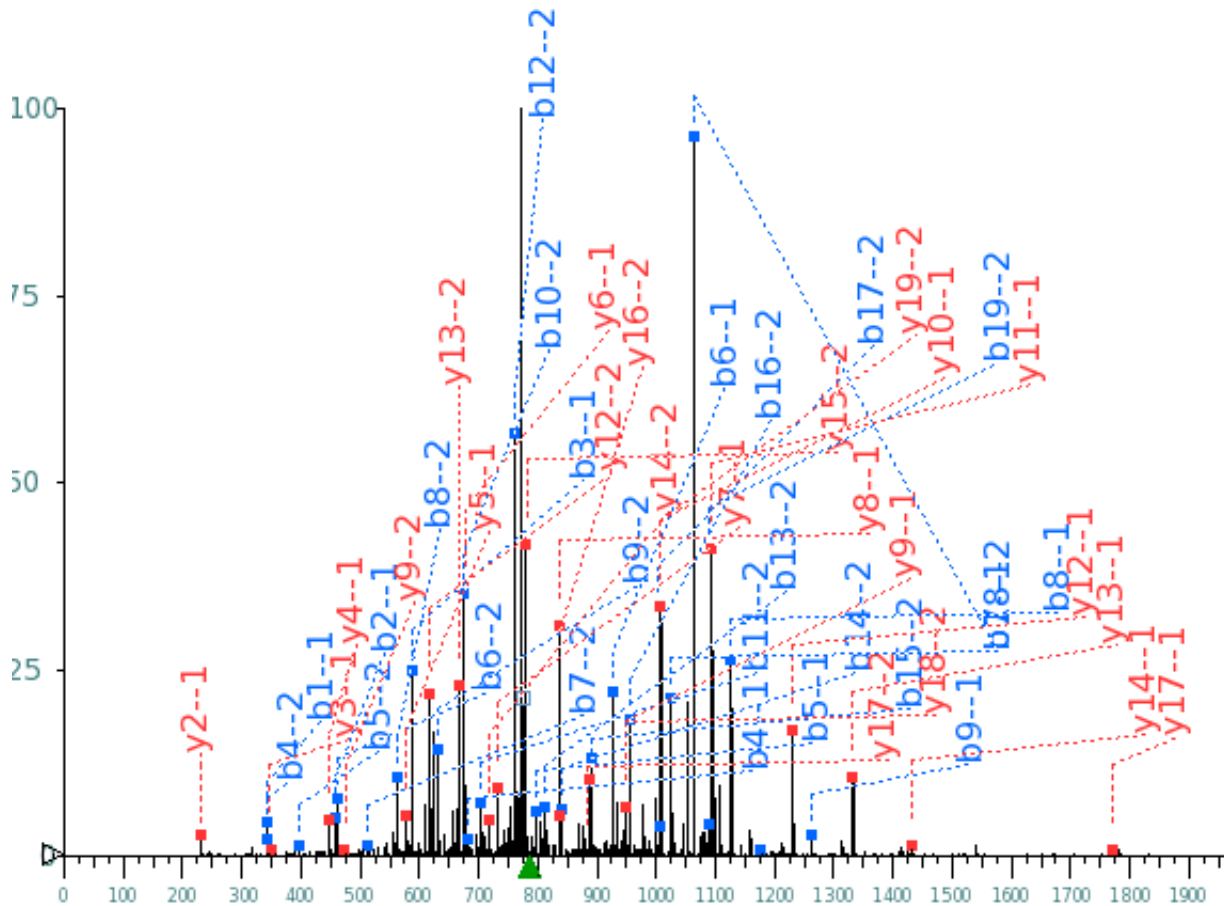

# IIEPNEVTHSGDTGVETDGR (+3)

Primary Reference: B4E2P4\_HUMAN

Search ID: 73851

Search Name: 20141113\_QLhumanTMT6lowres\_Obj14178\_CETSA\_1103\_Set2\_Fraction\_06

Scan#: 20127

Observed Mass: 785.7239 (-2.3 ppm)

PSM Score: 54.54

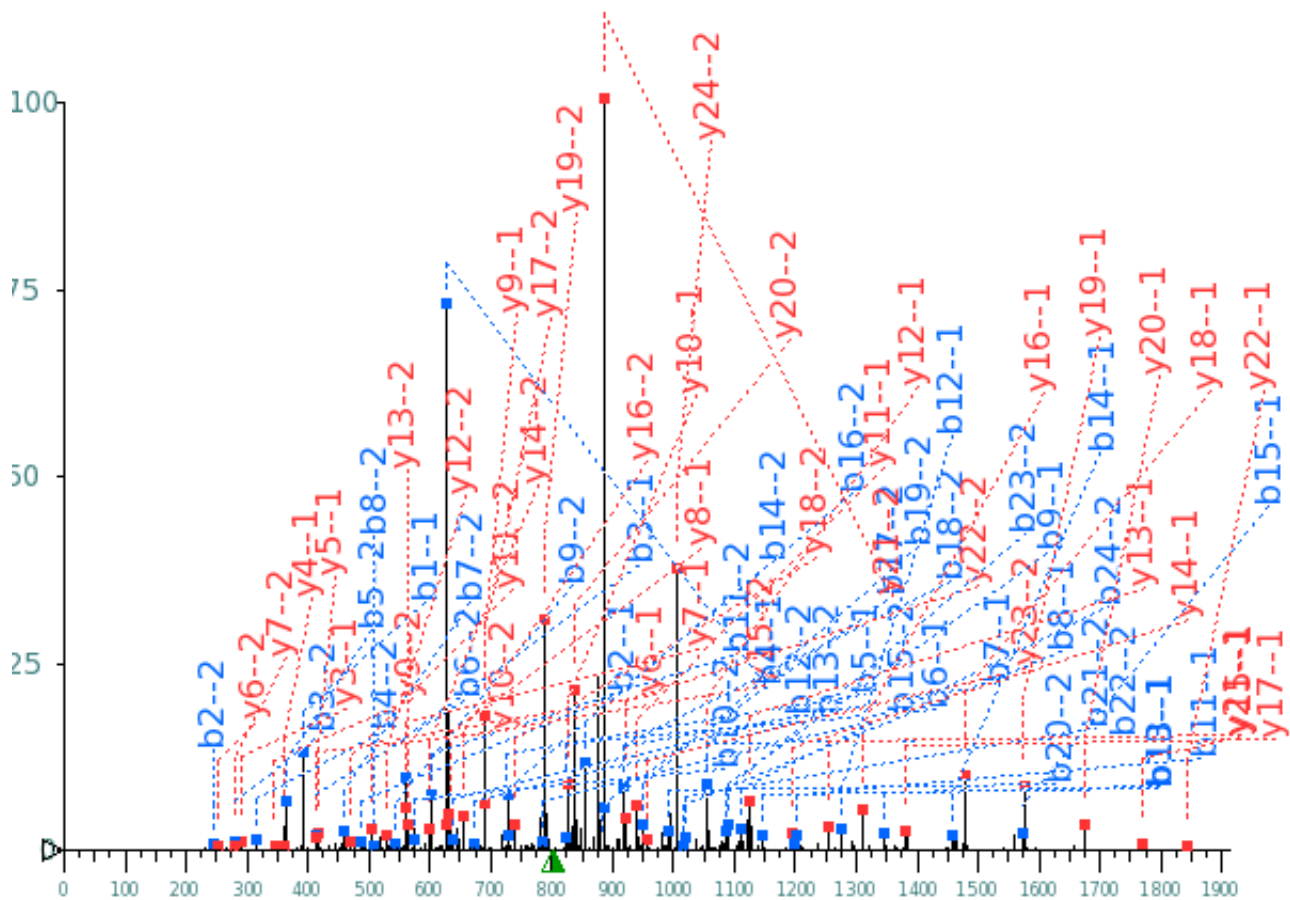

# CPAAPPPPAGGAANNHGAGSGAGGR (+3)

Primary Reference: Q96GF2\_HUMAN

Search ID: 73852

Search Name: 20141113\_QLhumanTMT6lowres\_Obj14178\_CETSA\_1103\_Set2\_Fraction\_07

Scan#: 11291

Observed Mass: 800.0584 (-1 ppm)

PSM Score: 118.06



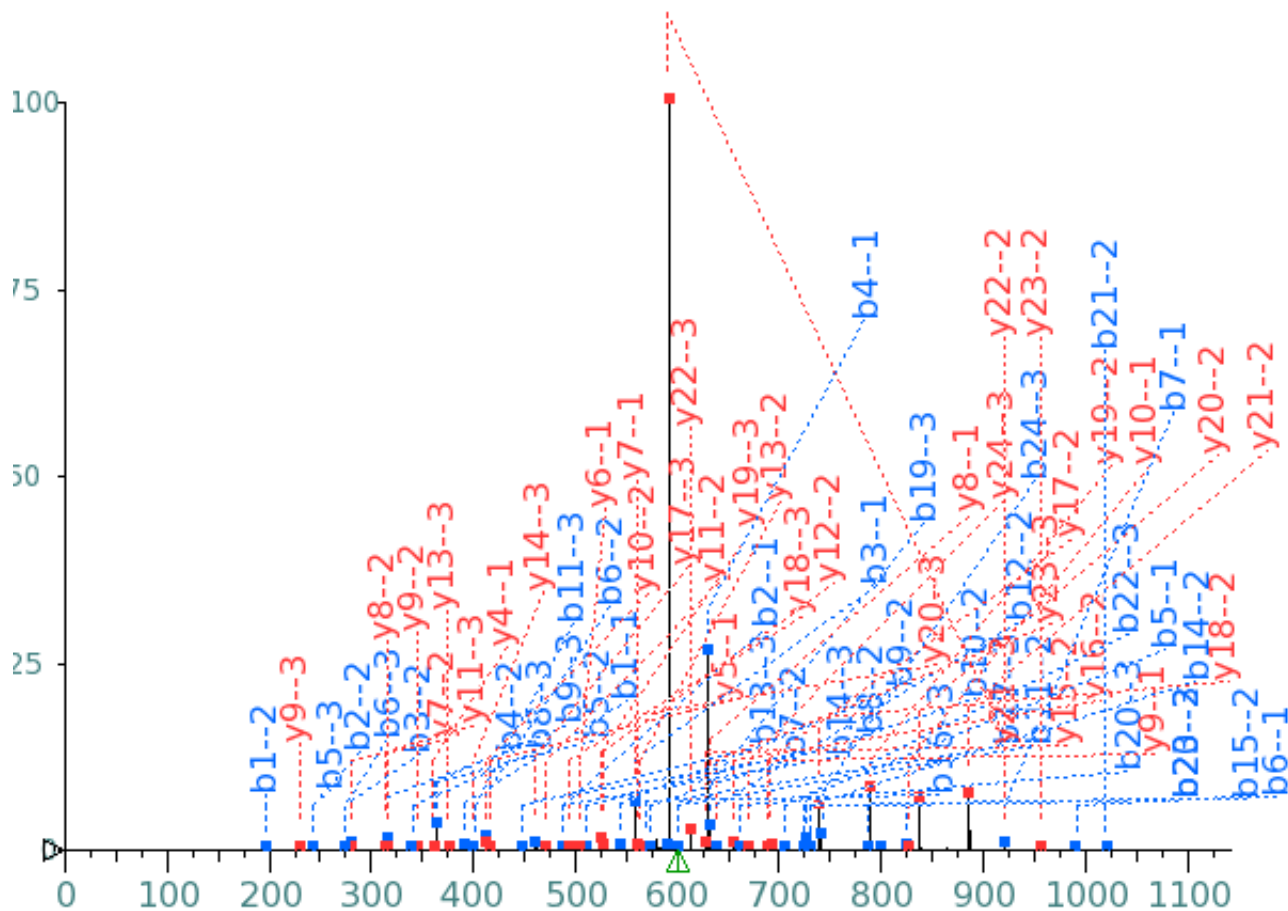

# CPAAPPPPAGGAANNHGAGSGAGGR (+4)

Primary Reference: Q96GF2\_HUMAN

Search ID: 73852

Search Name: 20141113\_QLhumanTMT6lowres\_Obj14178\_CETSA\_1103\_Set2\_Fraction\_07

Scan#: 11341

Observed Mass: 600.2954 (-1.4 ppm)

PSM Score: 25.14

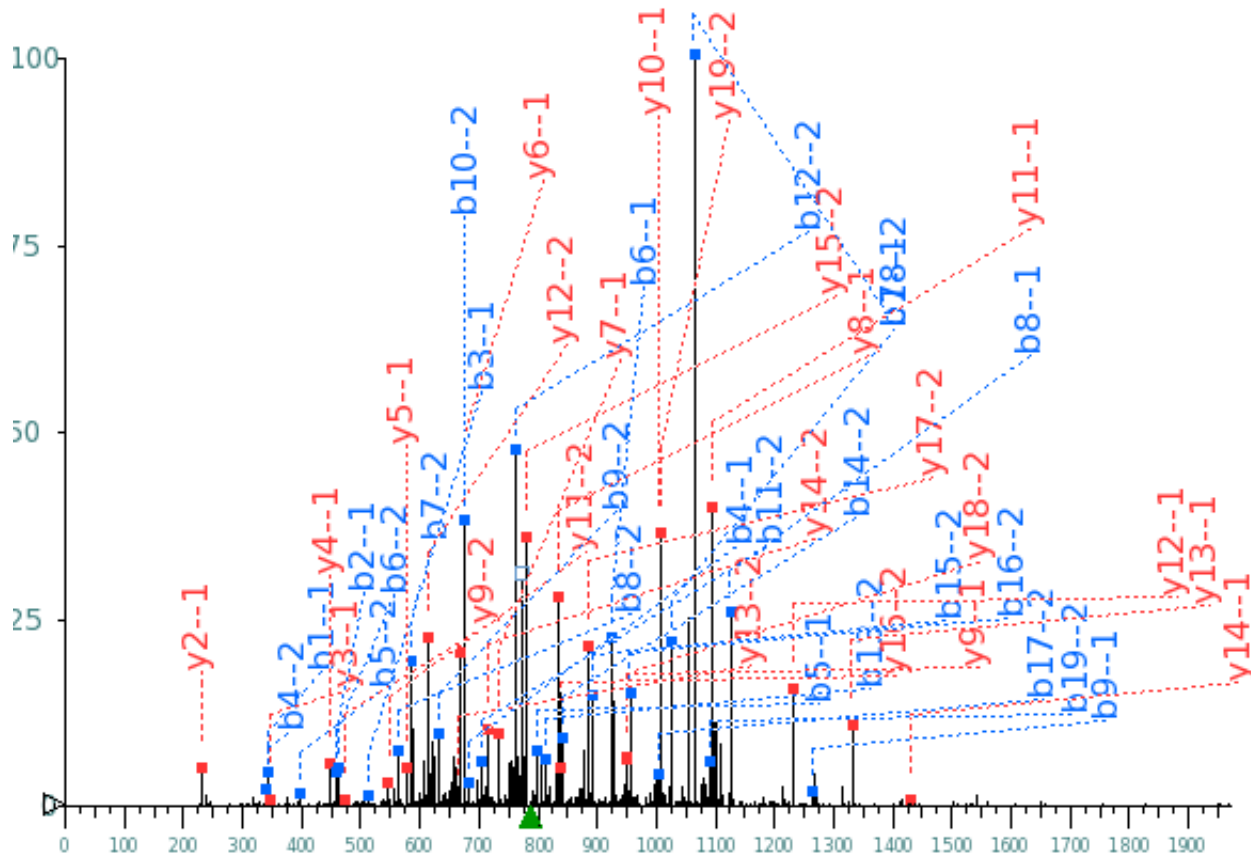

# IIEPNEVTHSGDTGVETDGR (+3)

Primary Reference: B4E2P4\_HUMAN

Search ID: 73852

Search Name: 20141113\_QLhumanTMT6lowres\_Obj14178\_CETSA\_1103\_Set2\_Fraction\_07

Scan#: 20403

Observed Mass: 785.7245 (-1.5 ppm)

PSM Score: 54.87

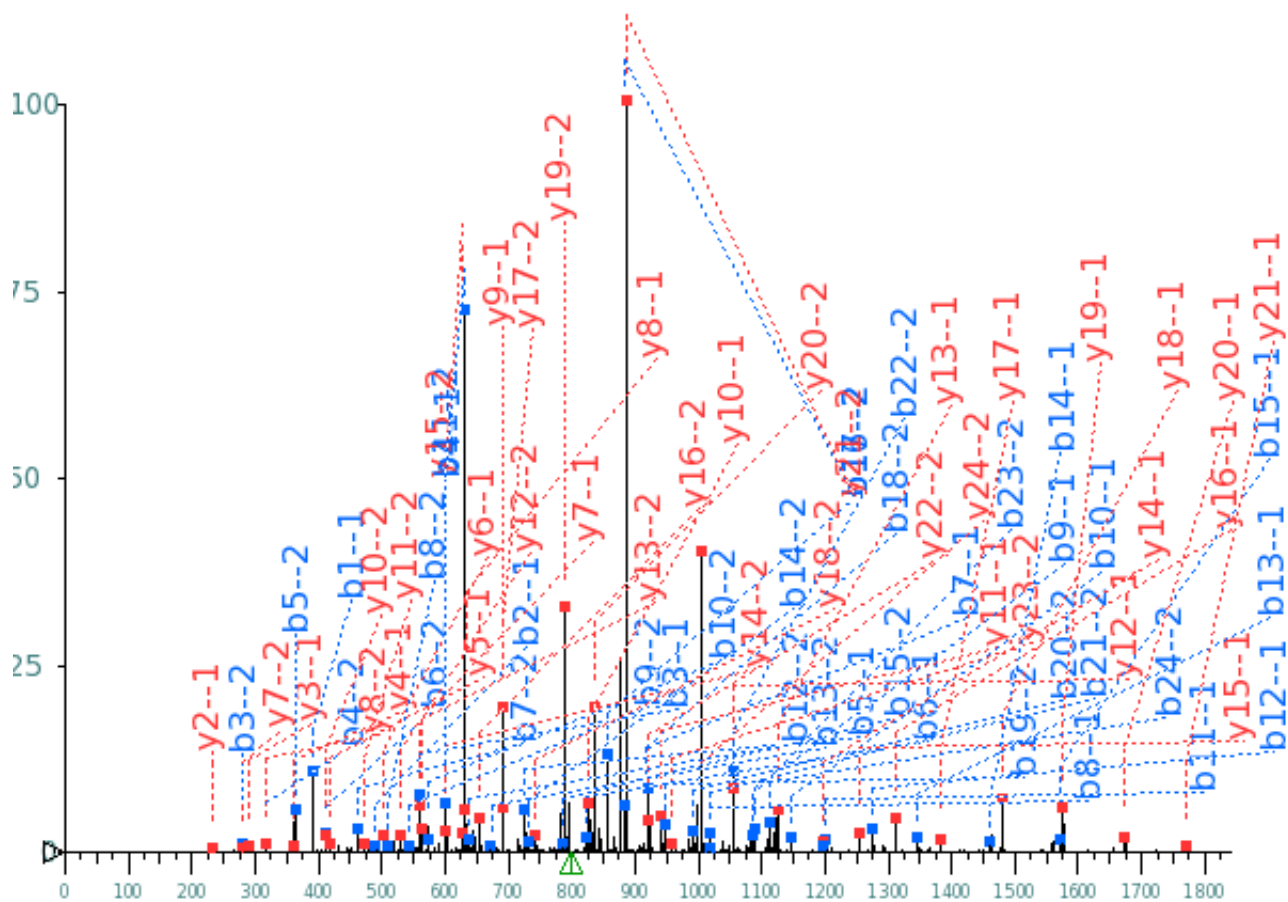

# CPAAPPPPAGGAANNHGAGSGAGGR (+3)

Primary Reference: Q96GF2\_HUMAN

Search ID: 73857

Search Name: 20141113\_QLhumanTMT6lowres\_Obj14178\_CETSA\_1103\_Set2\_Fraction\_08

Scan#: 10715

Observed Mass: 800.0586 (-0.8 ppm)

PSM Score: 110.74

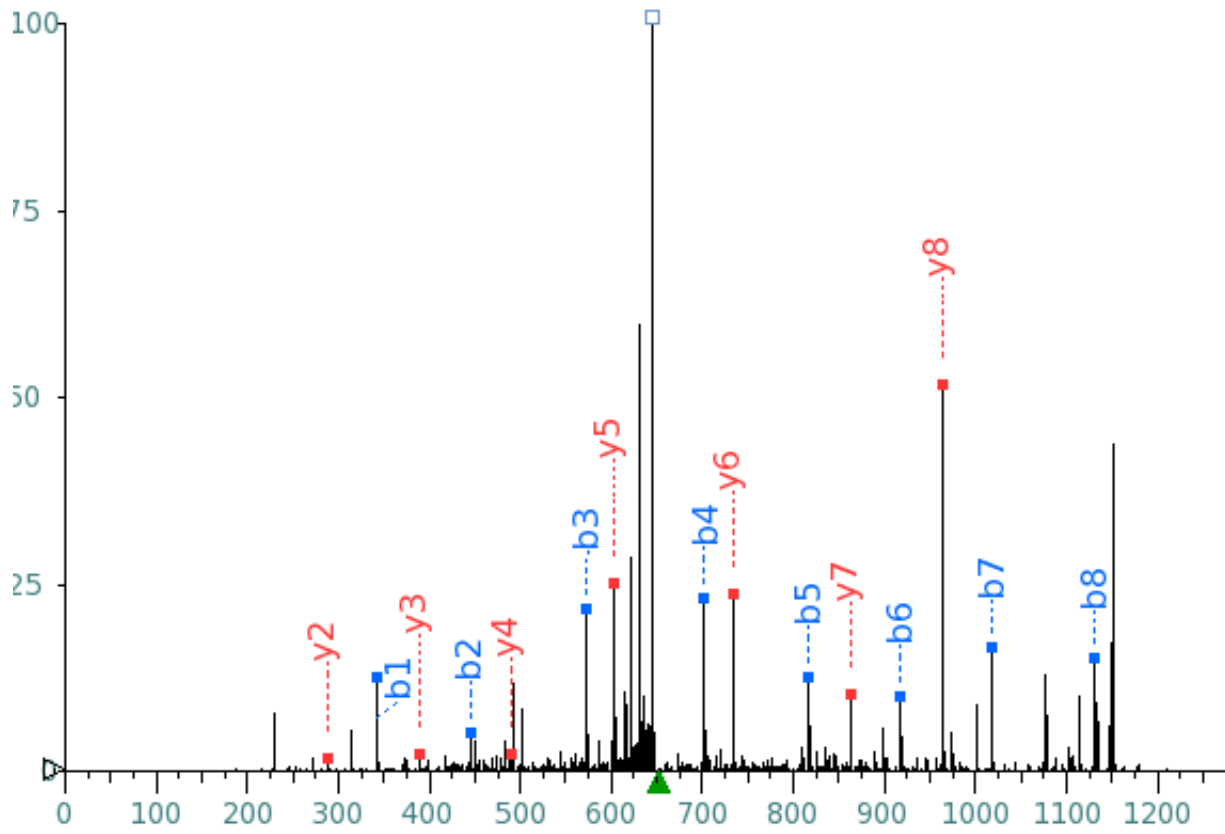

# LTEENTTLR (+2)

Primary Reference: PEG10\_HUMAN

Search ID: 73857

Search Name: 20141113\_QLhumanTMT6lowres\_Obj14178\_CETSA\_1103\_Set2\_Fraction\_08

Scan#: 15851

Observed Mass: 653.3628 (-2.1 ppm)

PSM Score: 40.58

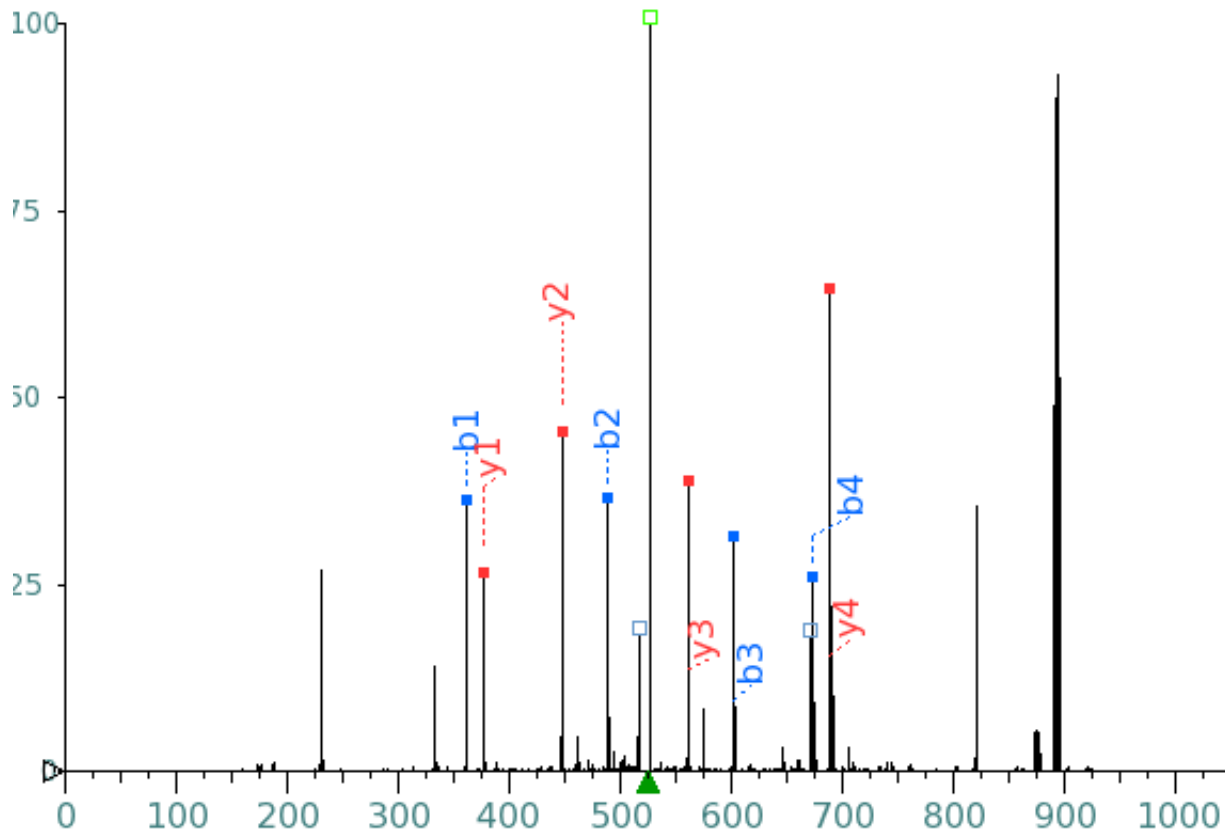

# MQLAK (+2)

Primary Reference: GSTM2\_HUMAN

Search ID: 73857

Search Name: 20141113\_QLhumanTMT6lowres\_Obj14178\_CETSA\_1103\_Set2\_Fraction\_08

Scan#: 17025

Observed Mass: 524.8321 (-1.9 ppm)

PSM Score: 15.49

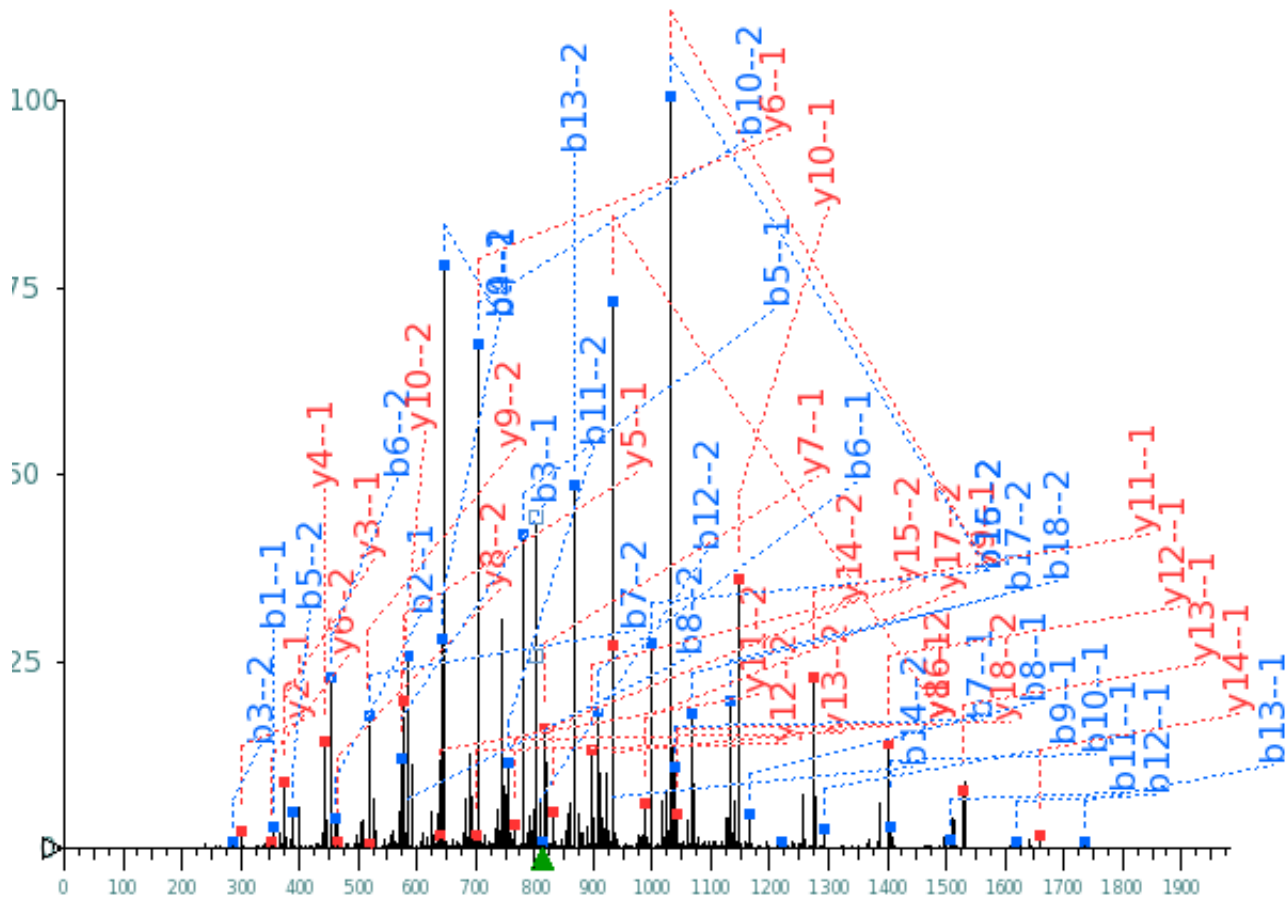

# QTI AHQQQLTNLQMAAQR (+3)

Primary Reference: E9PMU7\_HUMAN

Search ID: 73857

Search Name: 20141113\_QLhumanTMT6lowres\_Obj14178\_CETSA\_1103\_Set2\_Fraction\_08

Scan#: 19078

Observed Mass: 813.1014 (-1.4 ppm)

PSM Score: 93.07

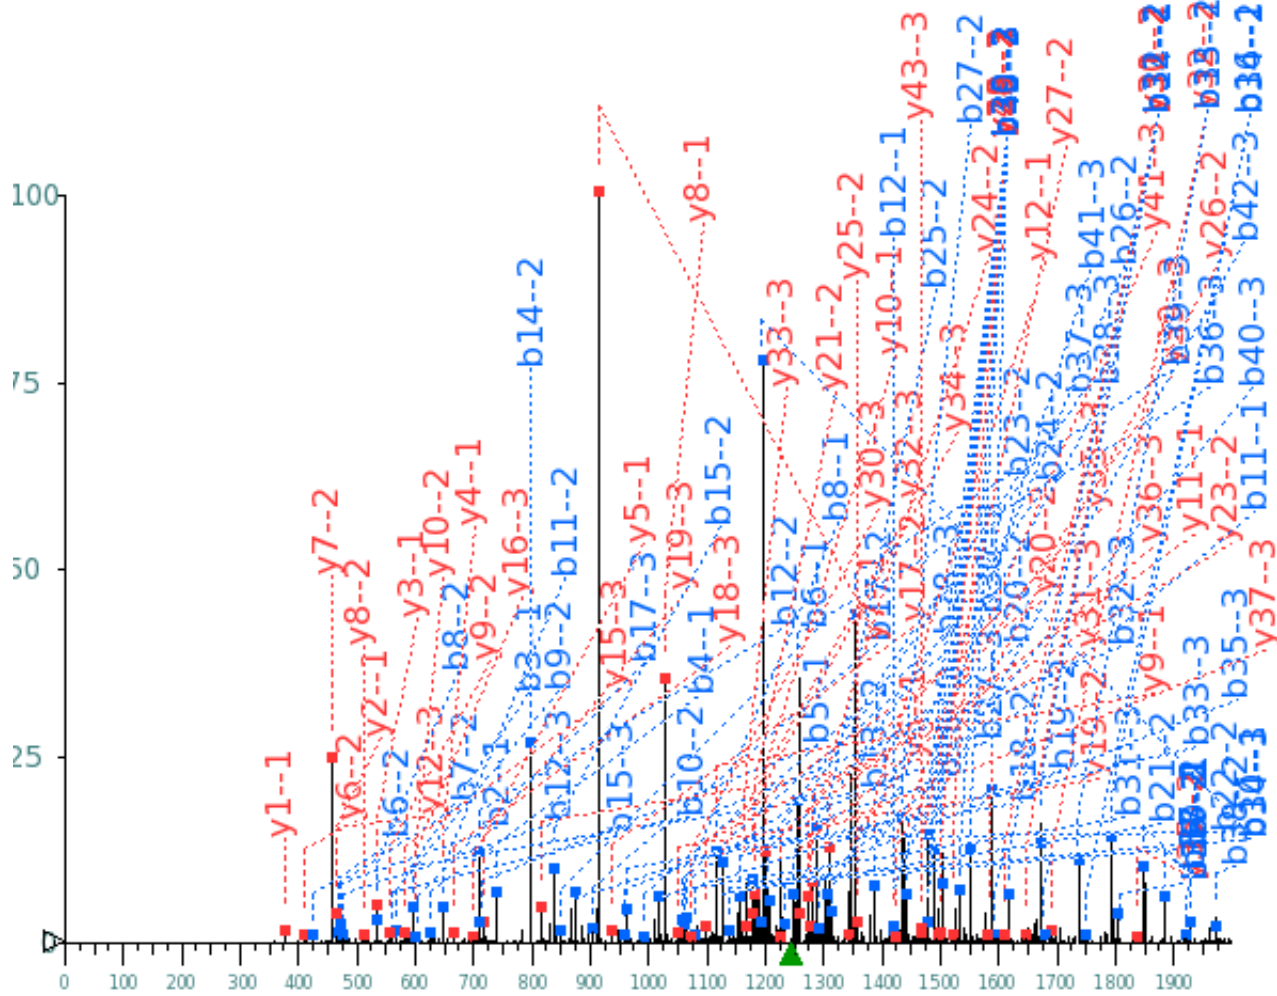

**QLPGSHSEAGVQGLSAGDDSETGSDCVTQAGLQLLASSDPPALASK (+4)**

Primary Reference: F5GZS6\_HUMAN

Search ID: 73857

Search Name: 20141113\_QLhumanTMT6lowres\_Obj14178\_CETSA\_1103\_Set2\_Fraction\_08

Scan#: 38596

Observed Mass: 1242.618 (-1.6 ppm)

PSM Score: 122.22

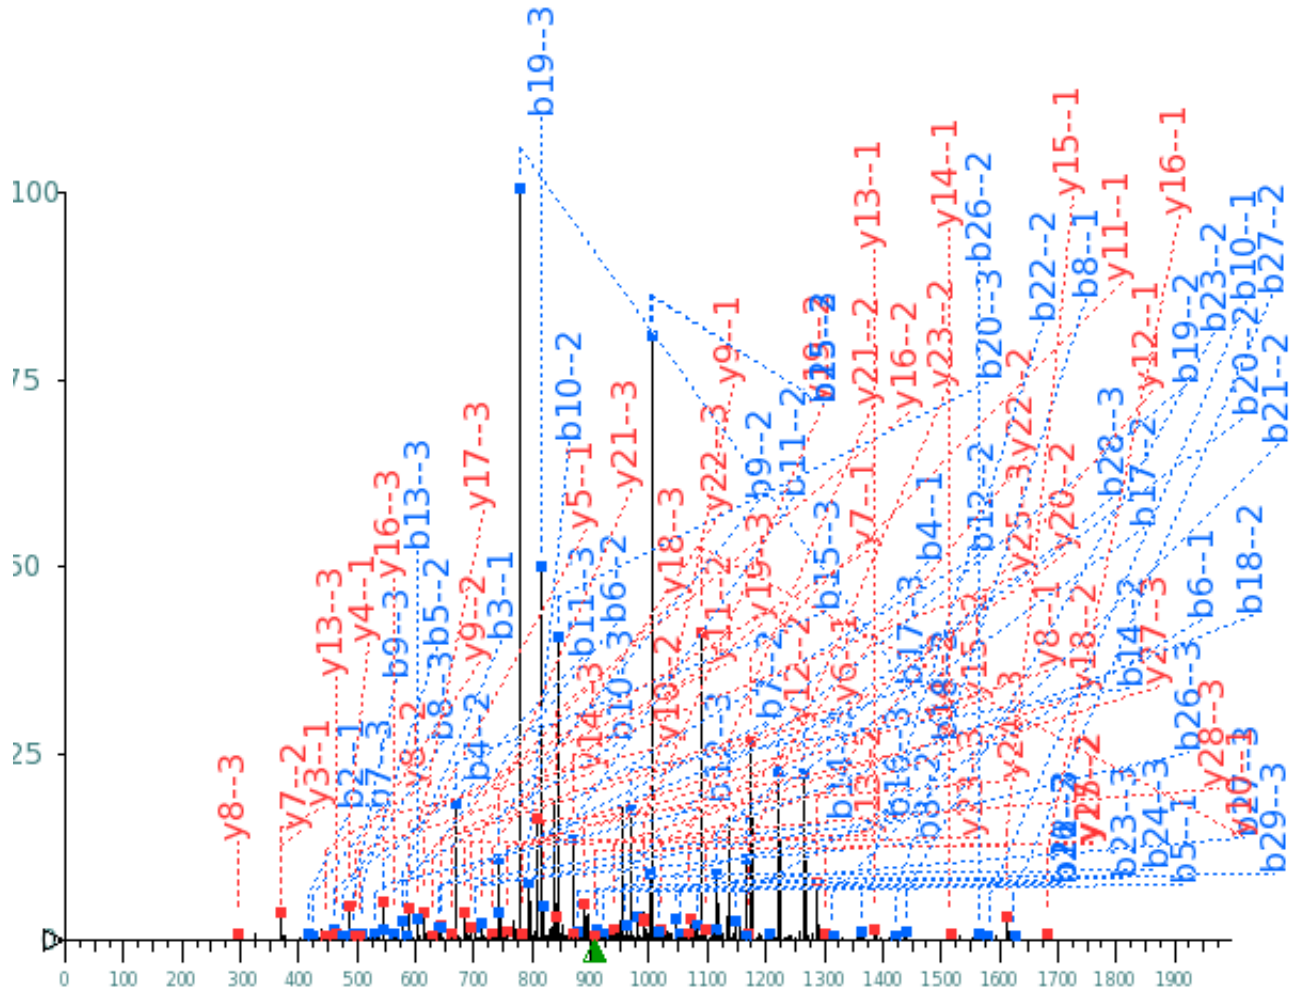

# SVFKPFIFGVGVAQAPQVLSPTFGAQPVR (+4)

Primary Reference: B7Z8S7\_HUMAN

Search ID: 73857

Search Name: 20141113\_QLhumanTMT6lowres\_Obj14178\_CETSA\_1103\_Set2\_Fraction\_08

Scan#: 43184

Observed Mass: 905.2604 (-1.4 ppm)

PSM Score: 45.19



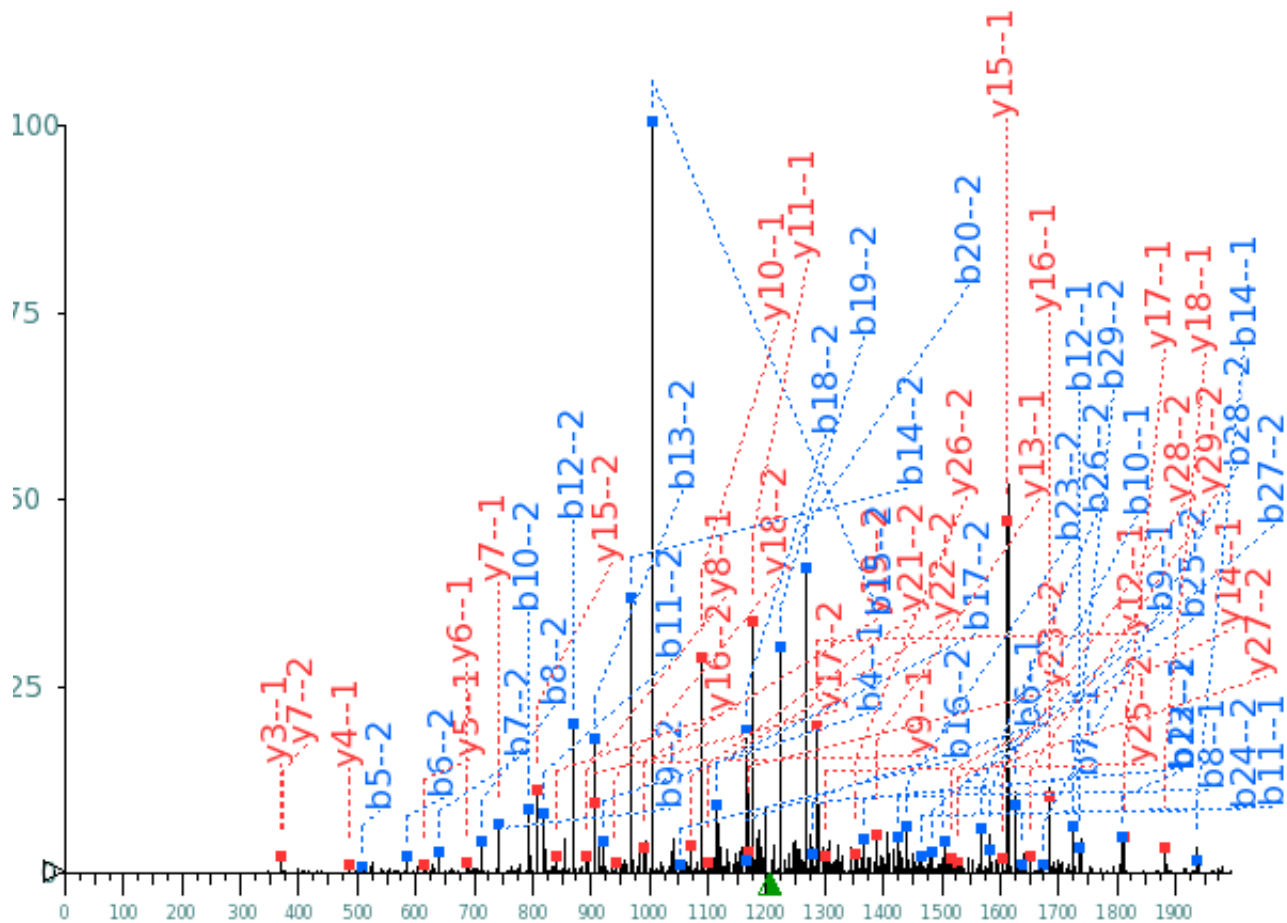

# SVFKPFIFGVGVAQAPQVLSPTFGAQDPVR (+3)

Primary Reference: B7Z8S7\_HUMAN

Search ID: 73857

Search Name: 20141113\_QLhumanTMT6lowres\_Obj14178\_CETSA\_1103\_Set2\_Fraction\_08

Scan#: 43211

Observed Mass: 1206.6777 (-1.8 ppm)

PSM Score: 98.29

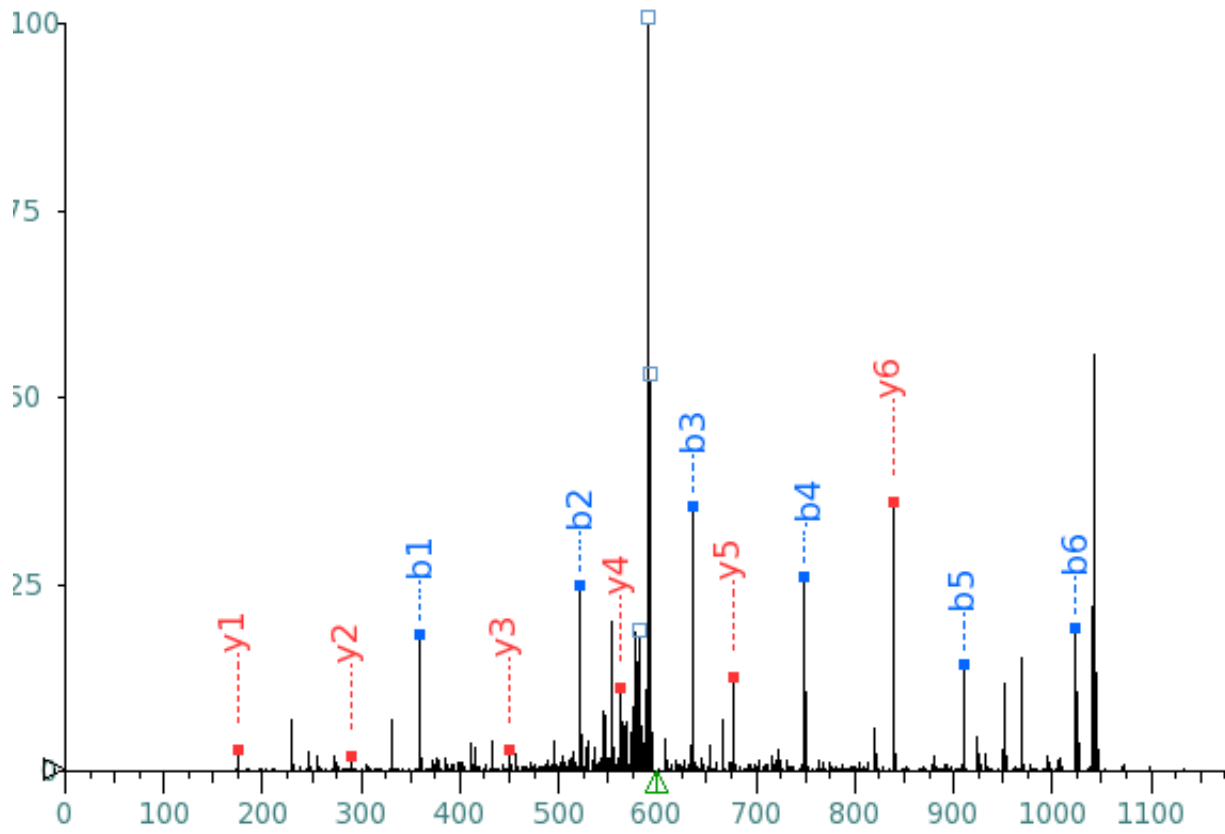

# EYINCNR (+2)

Primary Reference: SMRD2\_HUMAN

Search ID: 73860

Search Name: 20141113\_QLhumanTMT6lowres\_Obj14178\_CETSA\_1103\_Set2\_Fraction\_09

Scan#: 11789

Observed Mass: 599.2968 (-1.7 ppm)

PSM Score: 20.99

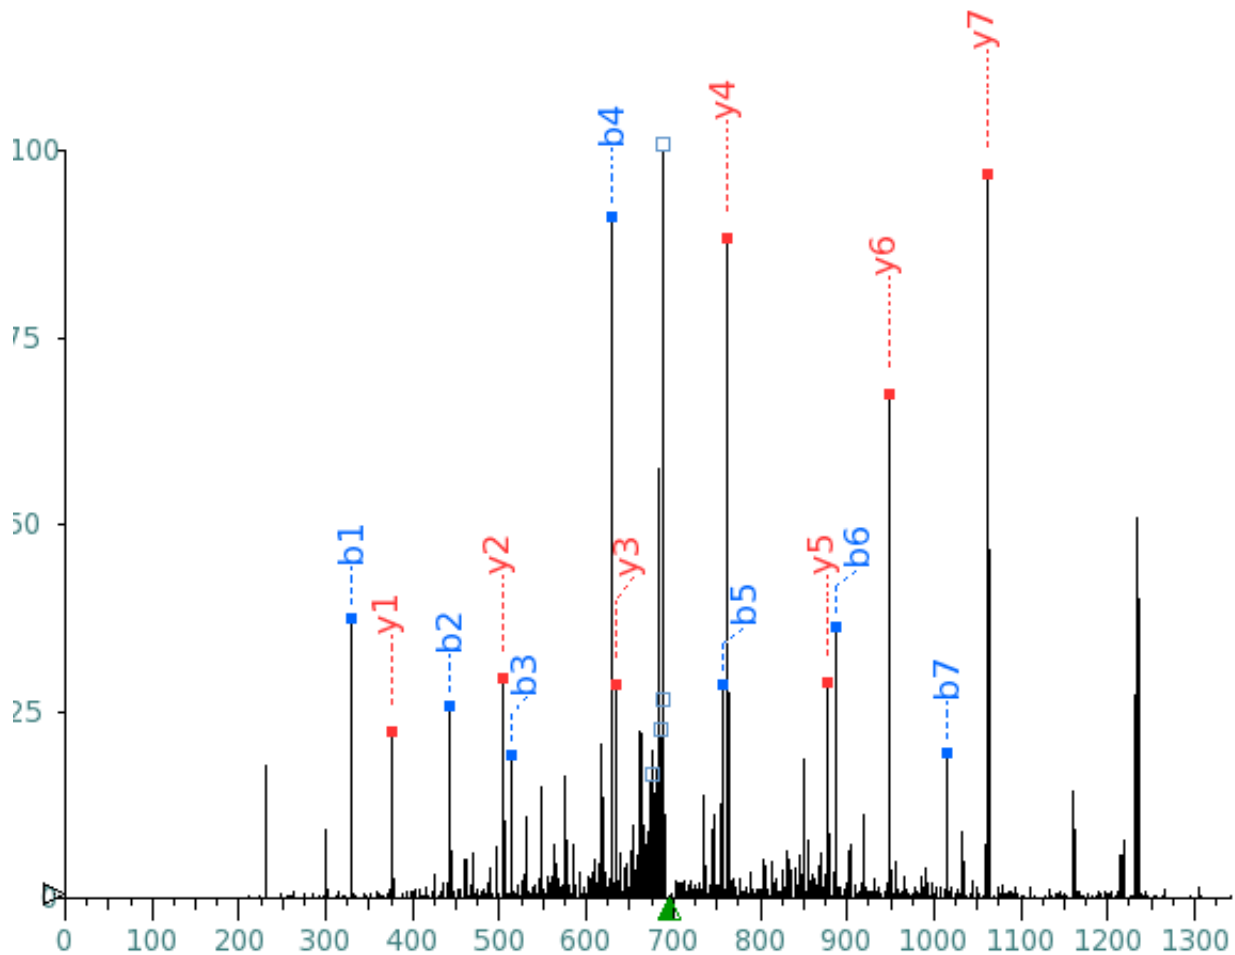

# VIADEEQK (+2)

Primary Reference: TRI44\_HUMAN

Search ID: 73860

Search Name: 20141113\_QLhumanTMT6lowres\_Obj14178\_CETSA\_1103\_Set2\_Fraction\_09

Scan#: 16901

Observed Mass: 695.4022 (-1.3 ppm)

PSM Score: 37.18

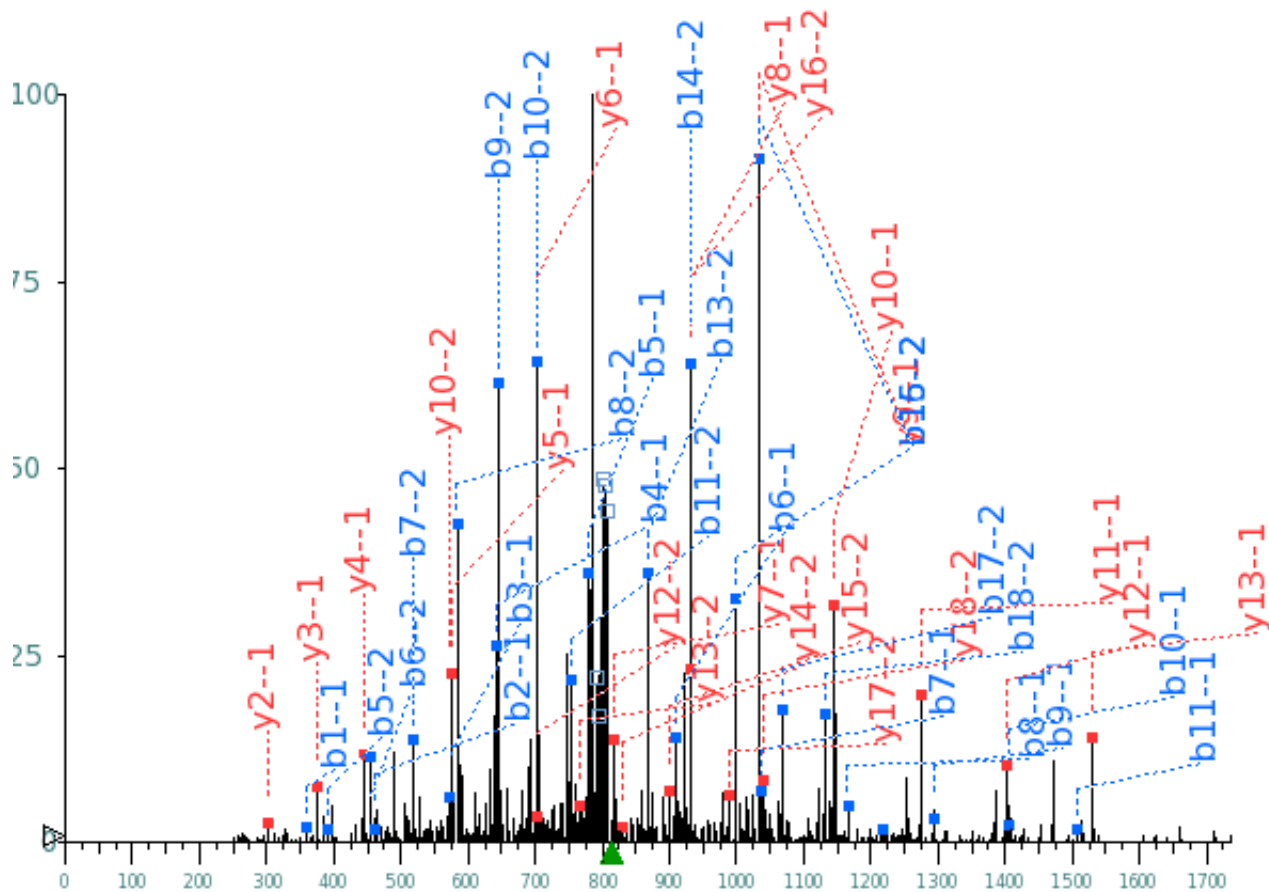

# QTIAHQQQQLTNLQMAAQR (+3)

Primary Reference: E9PMU7\_HUMAN

Search ID: 73860

Search Name: 20141113\_QLhumanTMT6lowres\_Obj14178\_CETSA\_1103\_Set2\_Fraction\_09

Scan#: 19636

Observed Mass: 813.1016 (-1.1 ppm)

PSM Score: 62.77

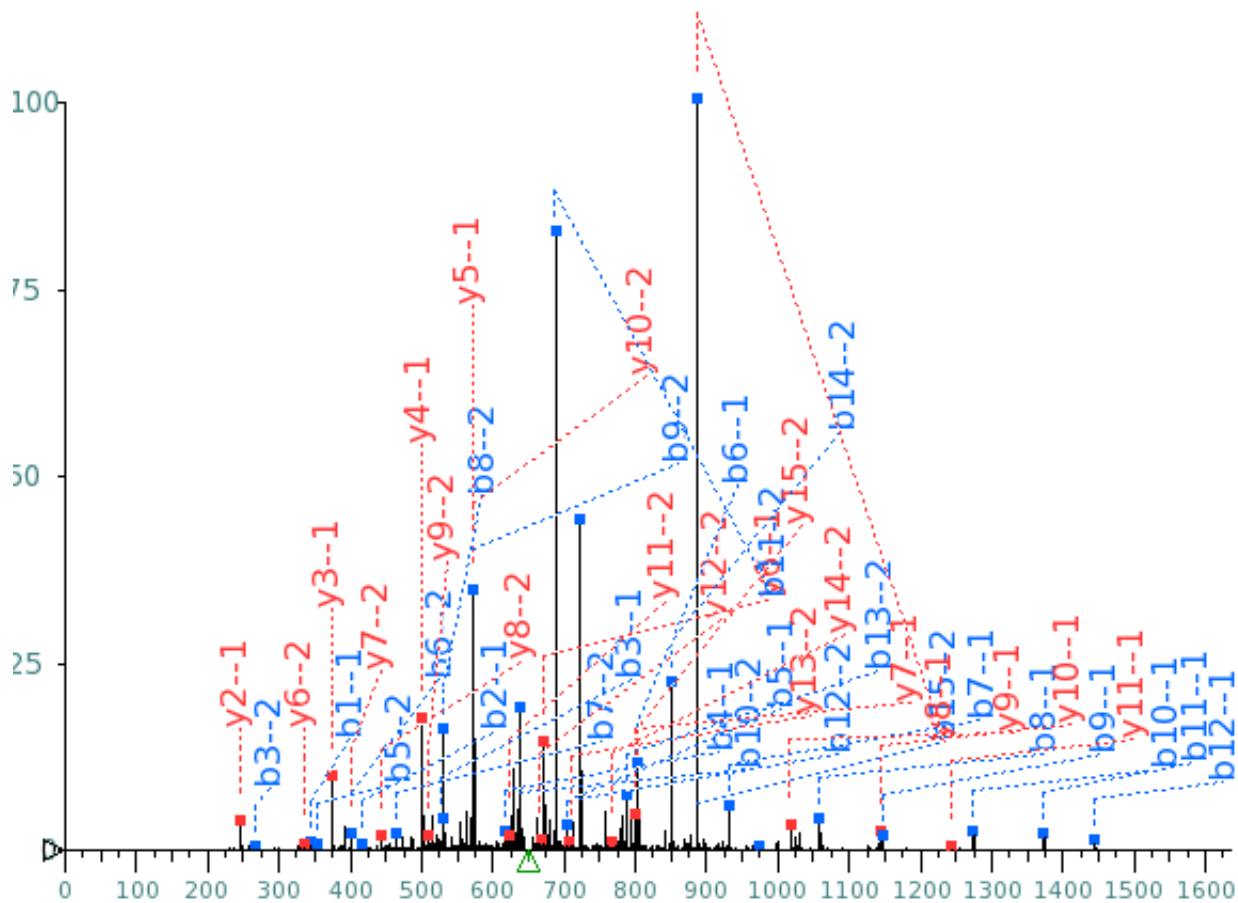

# DALSSVQESQVAQQAR (+3)

Primary Reference: APOC3\_HUMAN

Search ID: 73860

Search Name: 20141113\_QLhumanTMT6lowres\_Obj14178\_CETSA\_1103\_Set2\_Fraction\_09

Scan#: 20122

Observed Mass: 649.3425 (-0.6 ppm)

PSM Score: 60.72

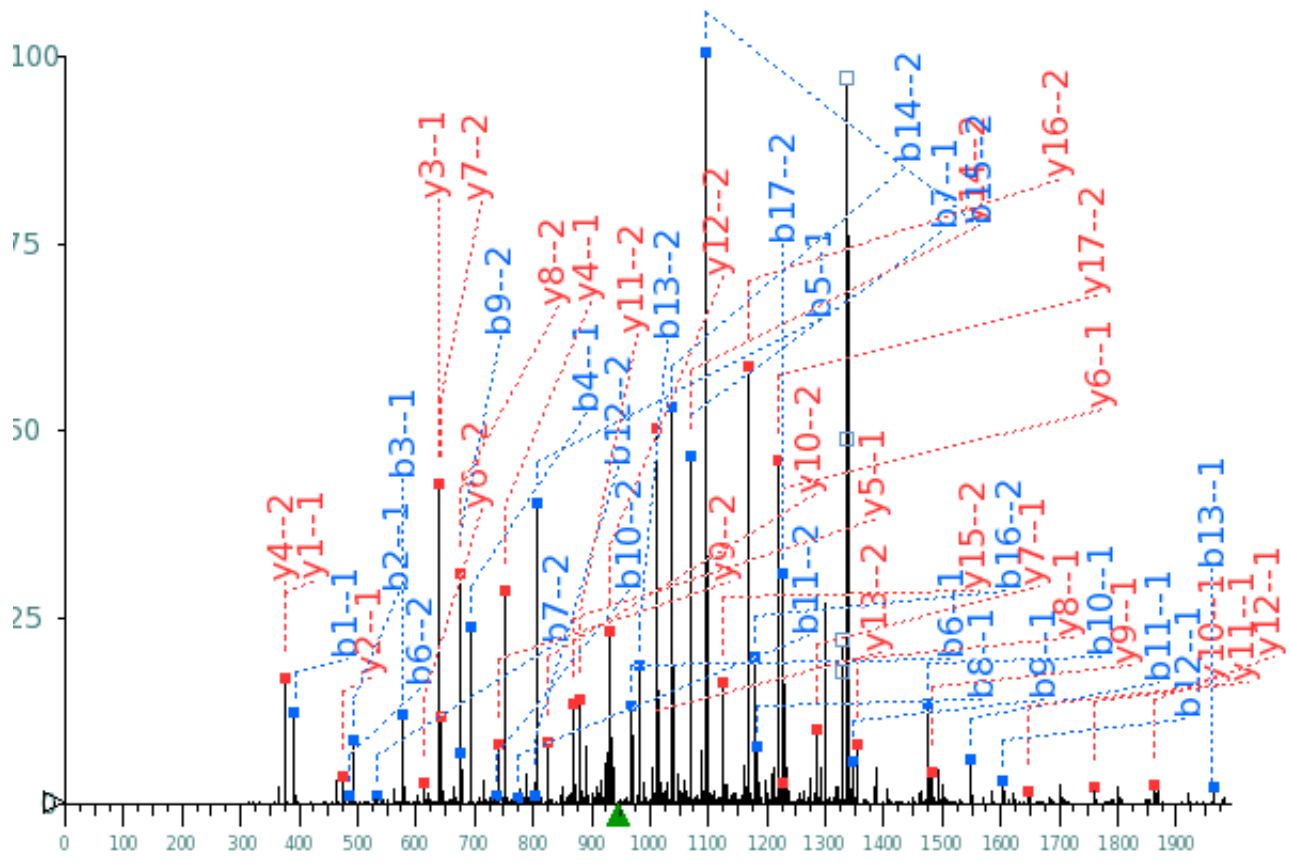

# YVSLIYTNYEAGKDDYVK (+3)

Primary Reference: C7DJS2\_HUMAN

Search ID: 73860

Search Name: 20141113\_QLhumanTMT6lowres\_Obj14178\_CETSA\_1103\_Set2\_Fraction\_09

Scan#: 32355

Observed Mass: 943.5138 (-2 ppm)

PSM Score: 51.33

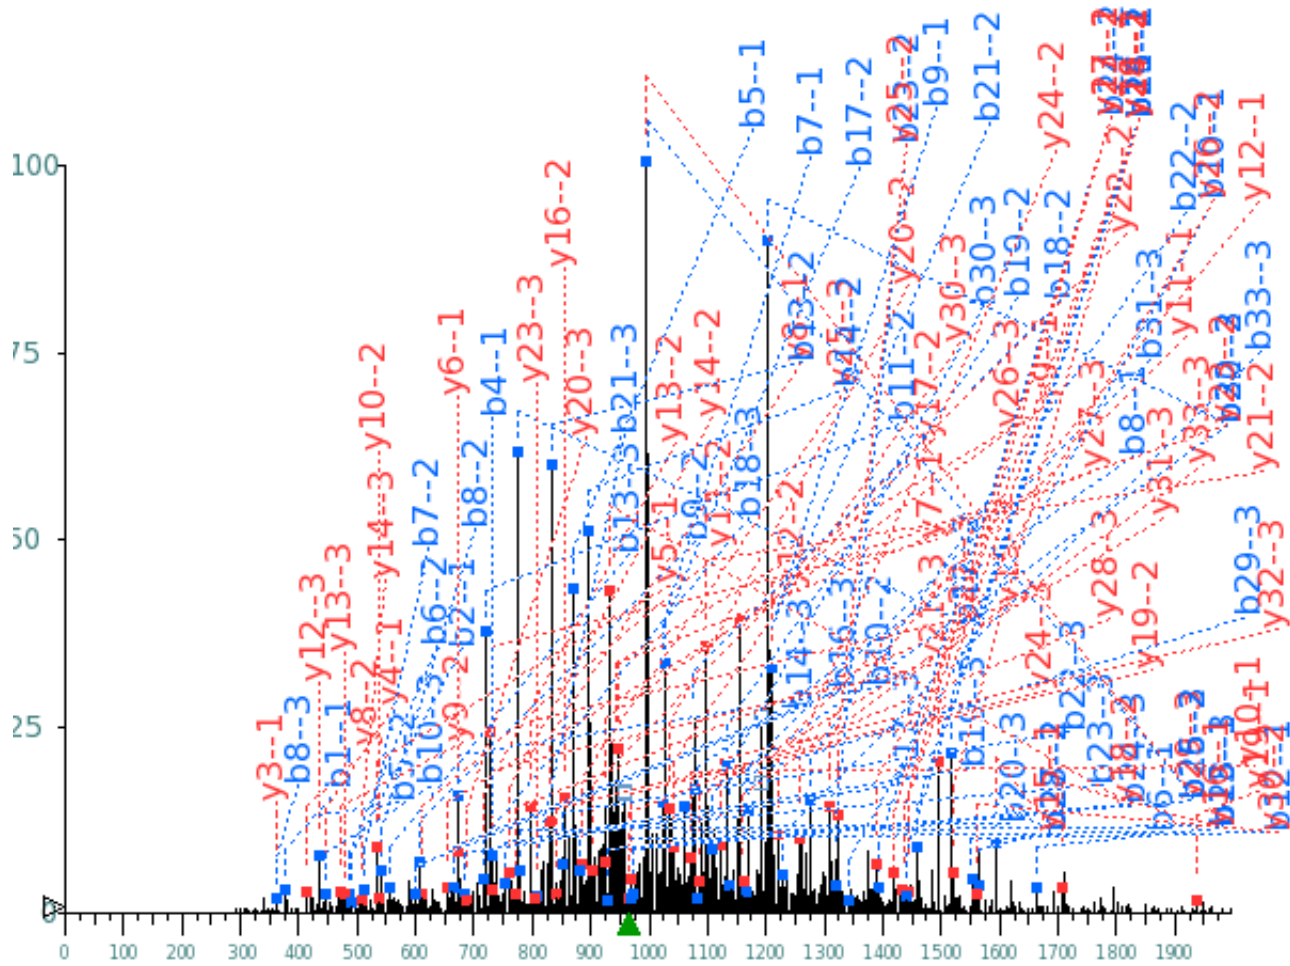

# FLNEHPGGEEVLLEQAGVDASESFDVGHSSDAR (+4)

Primary Reference: CYB5B\_HUMAN

Search ID: 73860

Search Name: 20141113\_QLhumanTMT6lowres\_Obj14178\_CETSA\_1103\_Set2\_Fraction\_09

Scan#: 36593

Observed Mass: 964.9564 (-1.6 ppm)

PSM Score: 92.09

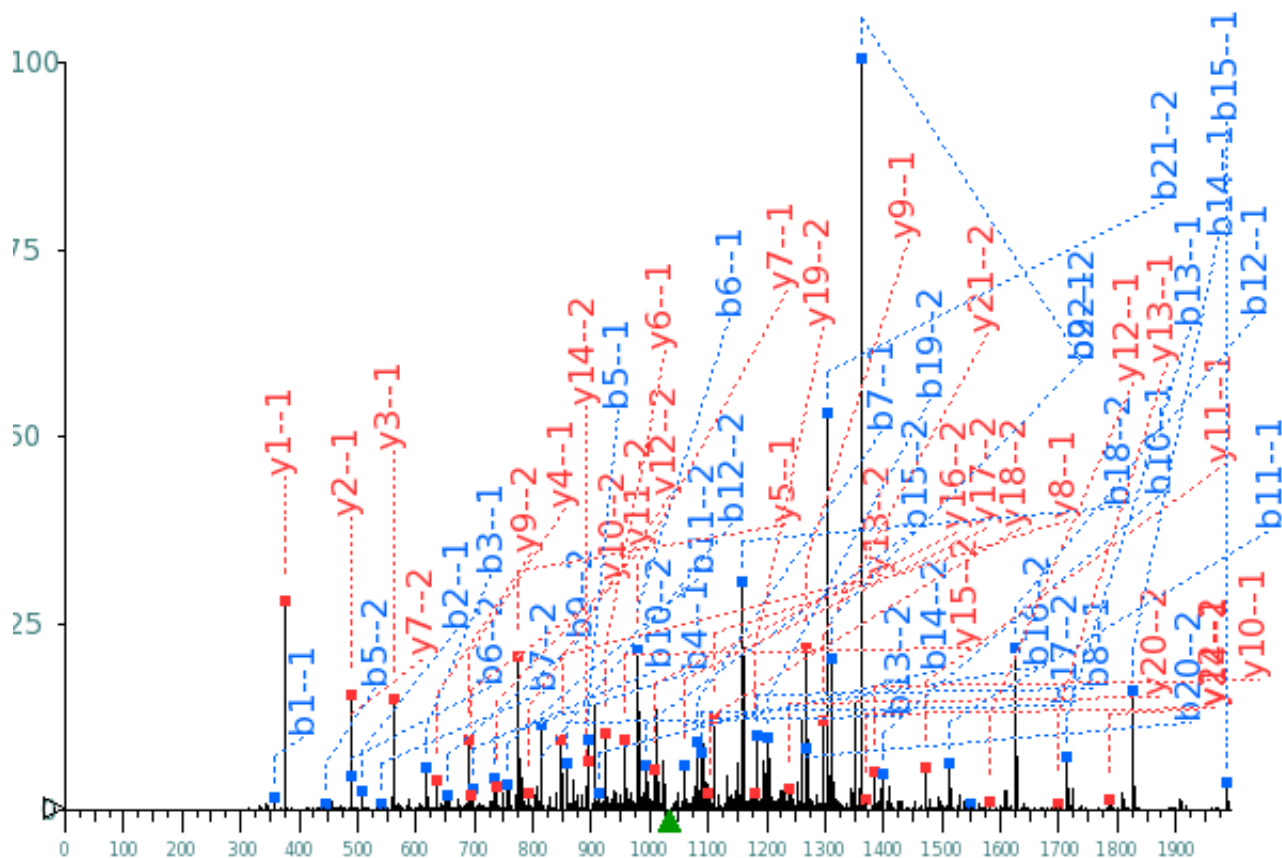

# QFLDCSTTQSDL~~S~~LCEGFSEALK (+3)

Primary Reference: CHC10\_HUMAN

Search ID: 73860

Search Name: 20141113\_QLhumanTMT6lowres\_Obj14178\_CETSA\_1103\_Set2\_Fraction\_09

Scan#: 39756

Observed Mass: 1032.1718 (-3.4 ppm)

PSM Score: 76.25



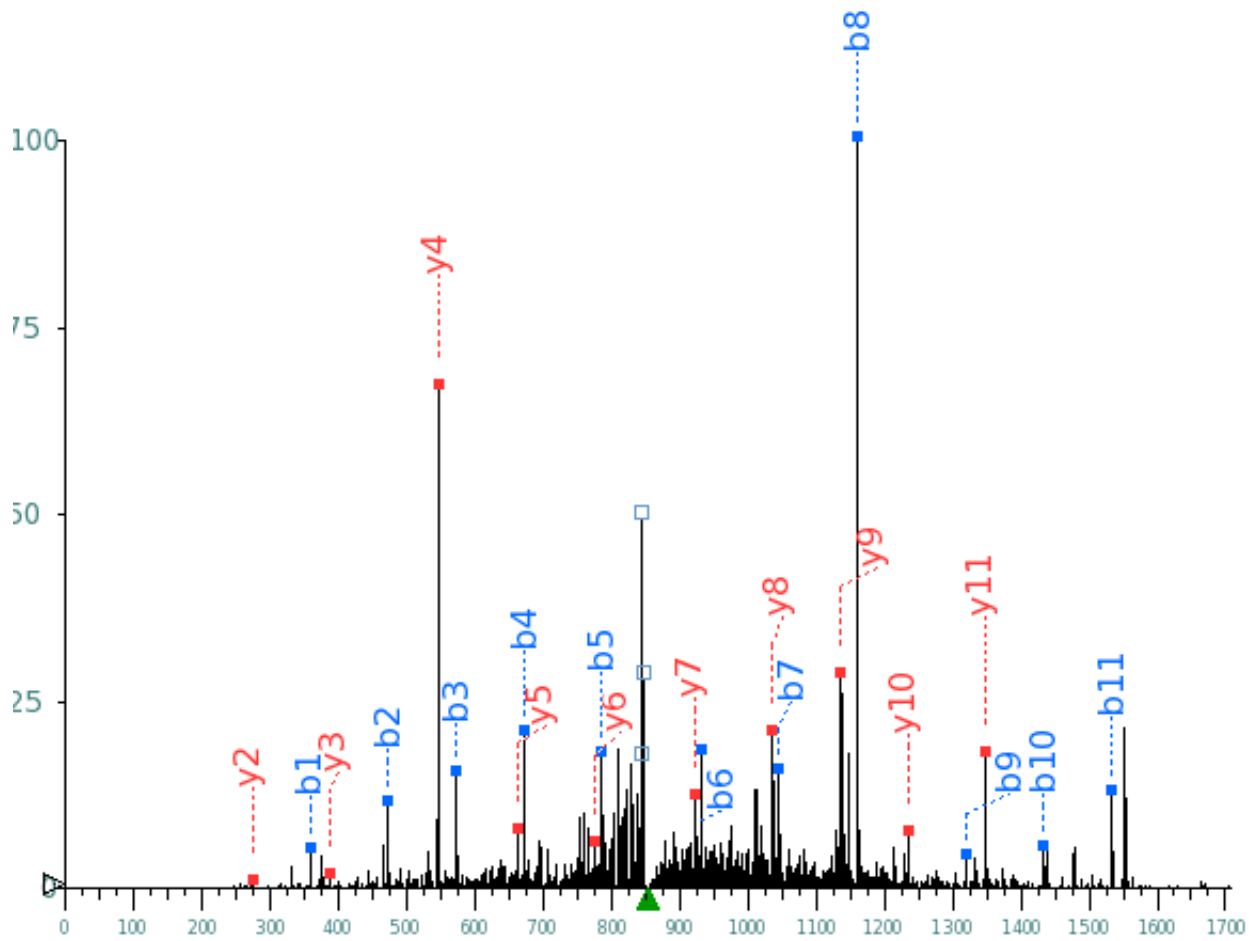

# ENVVNFIDCLVR (+2)

Primary Reference: ORC3\_HUMAN

Search ID: 73860

Search Name: 20141113\_QLhumanTMT6lowres\_Obj14178\_CETSA\_1103\_Set2\_Fraction\_09

Scan#: 41437

Observed Mass: 853.9562 (-2.7 ppm)

PSM Score: 51.83

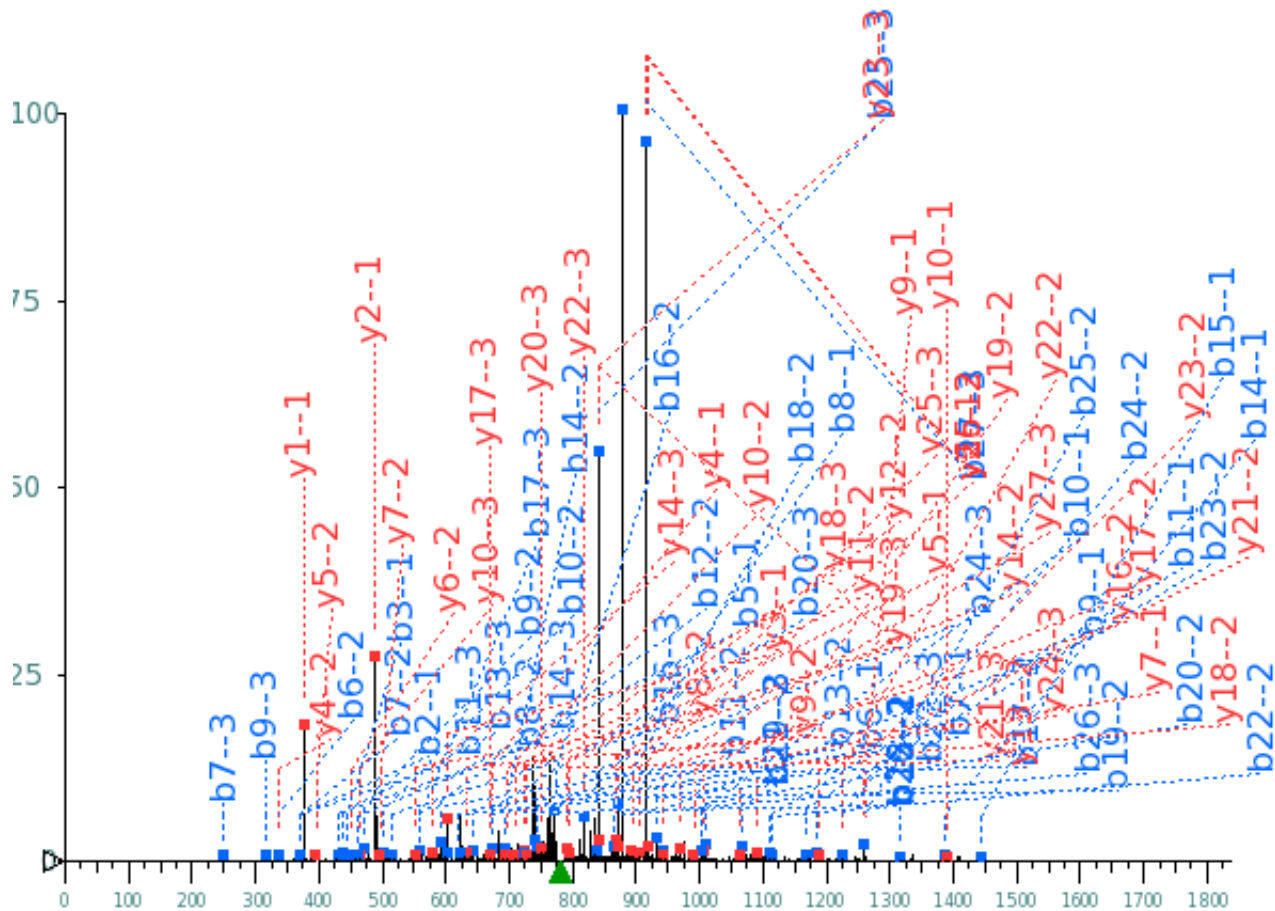

# AAAASAAEAGIATTGTEGERDSDDALLK (+4)

Primary Reference: Q5VWC4\_HUMAN

Search ID: 73873

Search Name: 20141113\_QLhumanTMT6lowres\_Obj14178\_CETSA\_1103\_Set2\_Fraction\_10\_2

Scan#: 27576

Observed Mass: 780.9044 (-3.3 ppm)

PSM Score: 32.07

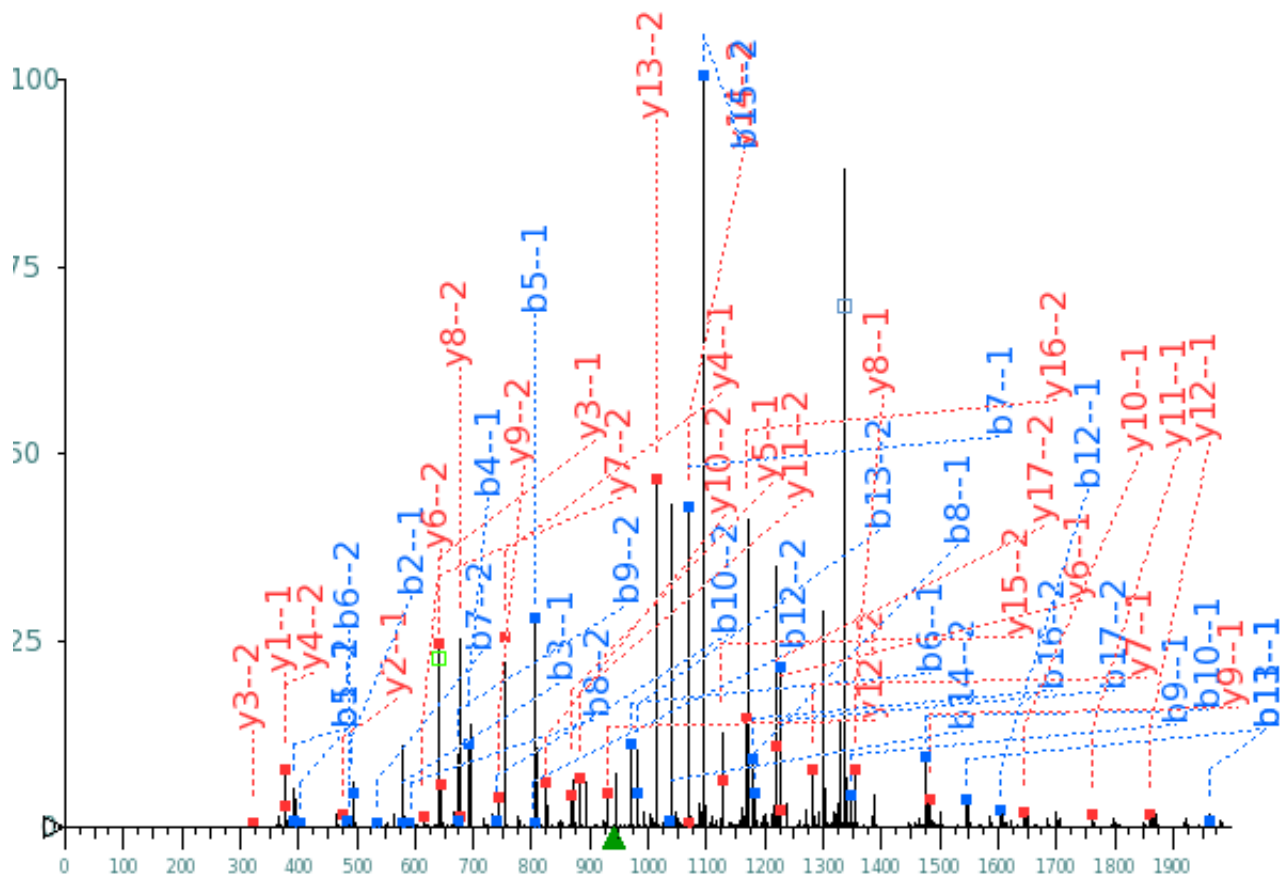

# YVSLIYTNYEAGKDDYVK (+3)

Primary Reference: C7DJS2\_HUMAN

Search ID: 73873

Search Name: 20141113\_QLhumanTMT6lowres\_Obj14178\_CETSA\_1103\_Set2\_Fraction\_10\_2

Scan#: 33013

Observed Mass: 943.5162 (0.6 ppm)

PSM Score: 22.19

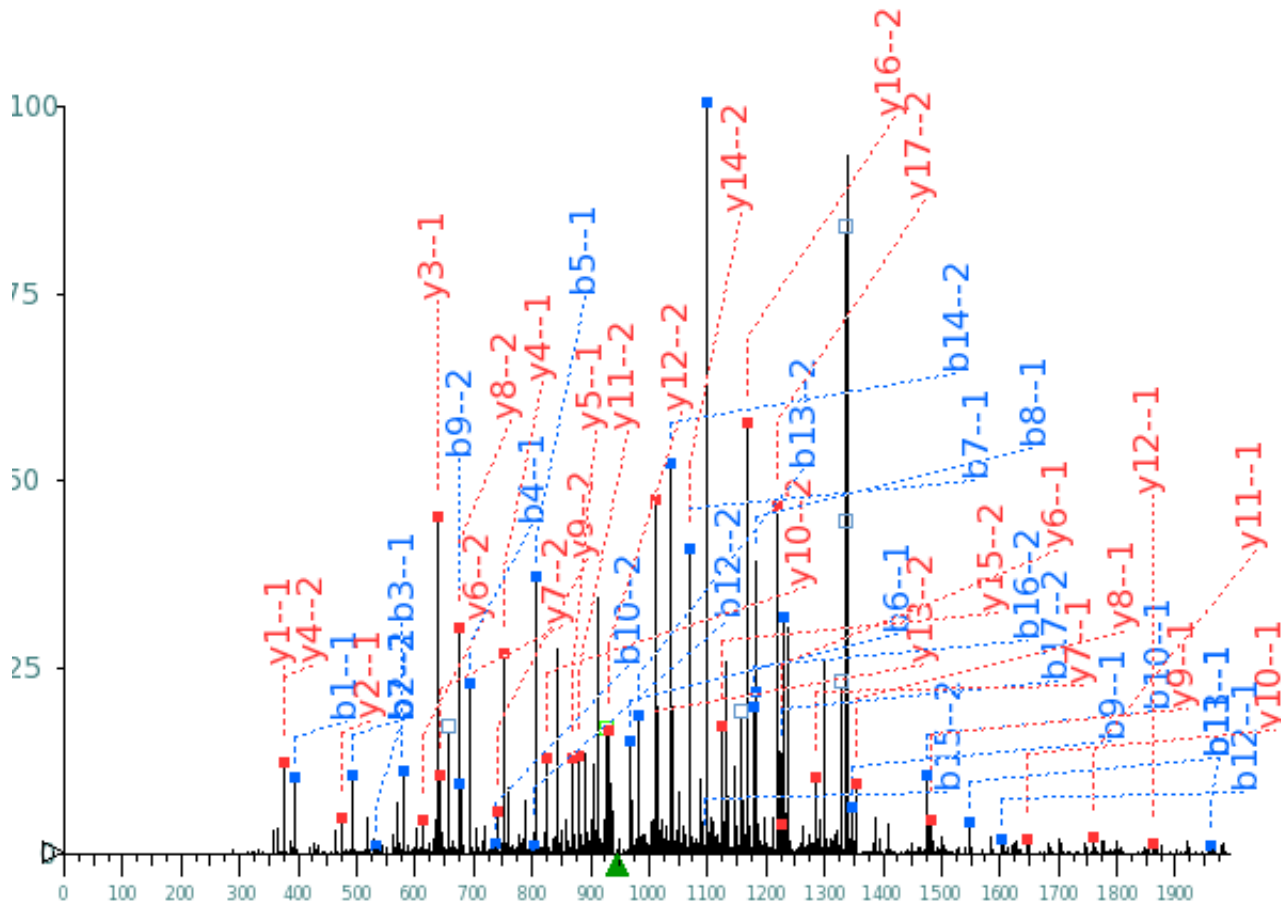

# YVSLIYTNYEAGKDDYVK (+3)

Primary Reference: C7DJS2\_HUMAN

Search ID: 73873

Search Name: 20141113\_QLhumanTMT6lowres\_Obj14178\_CETSA\_1103\_Set2\_Fraction\_10\_2

Scan#: 33276

Observed Mass: 943.5124 (-3.5 ppm)

PSM Score: 39.57

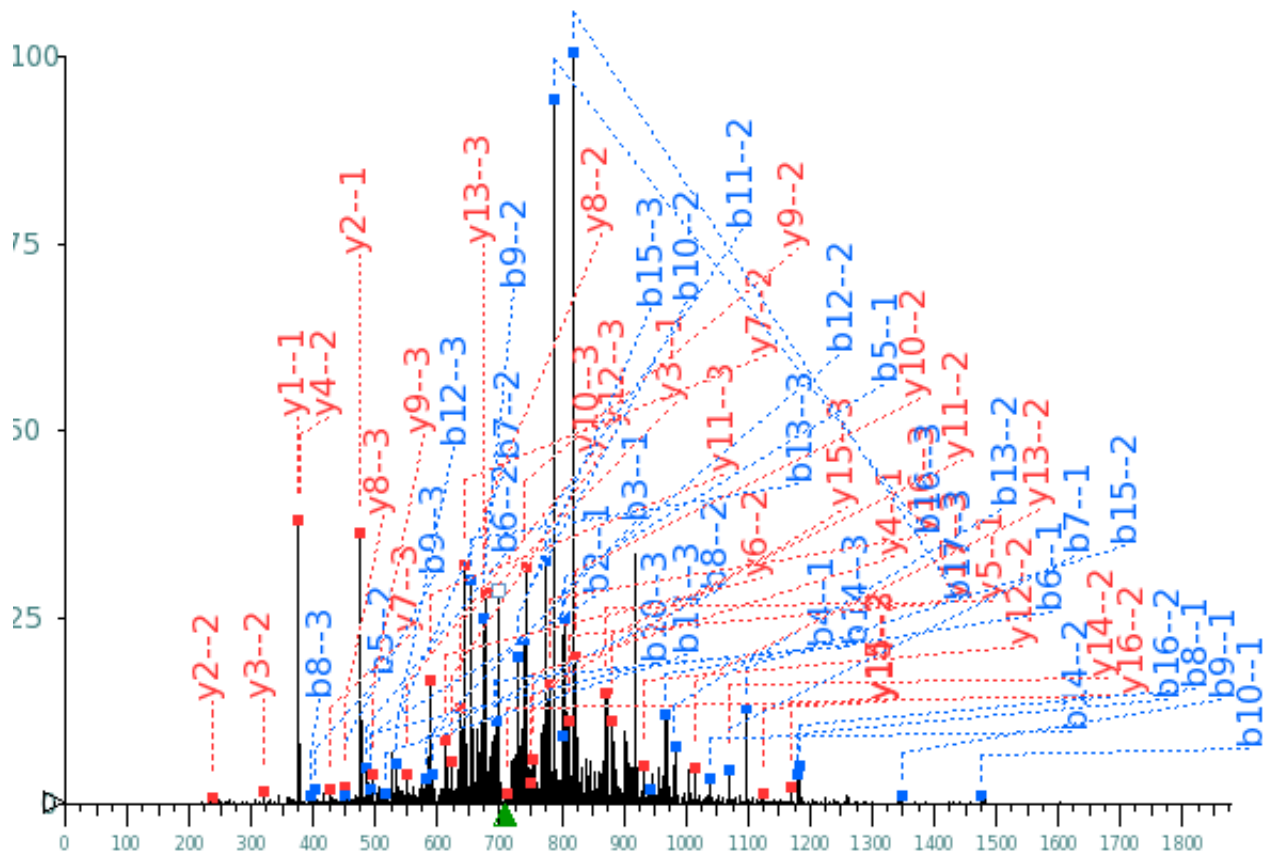

# YVSLIYTNYEAGKDDYVK (+4)

Primary Reference: C7DJS2\_HUMAN

Search ID: 73873

Search Name: 20141113\_QLhumanTMT6lowres\_Obj14178\_CETSA\_1103\_Set2\_Fraction\_10\_2

Scan#: 33316

Observed Mass: 707.8862 (-3.3 ppm)

PSM Score: 24.81

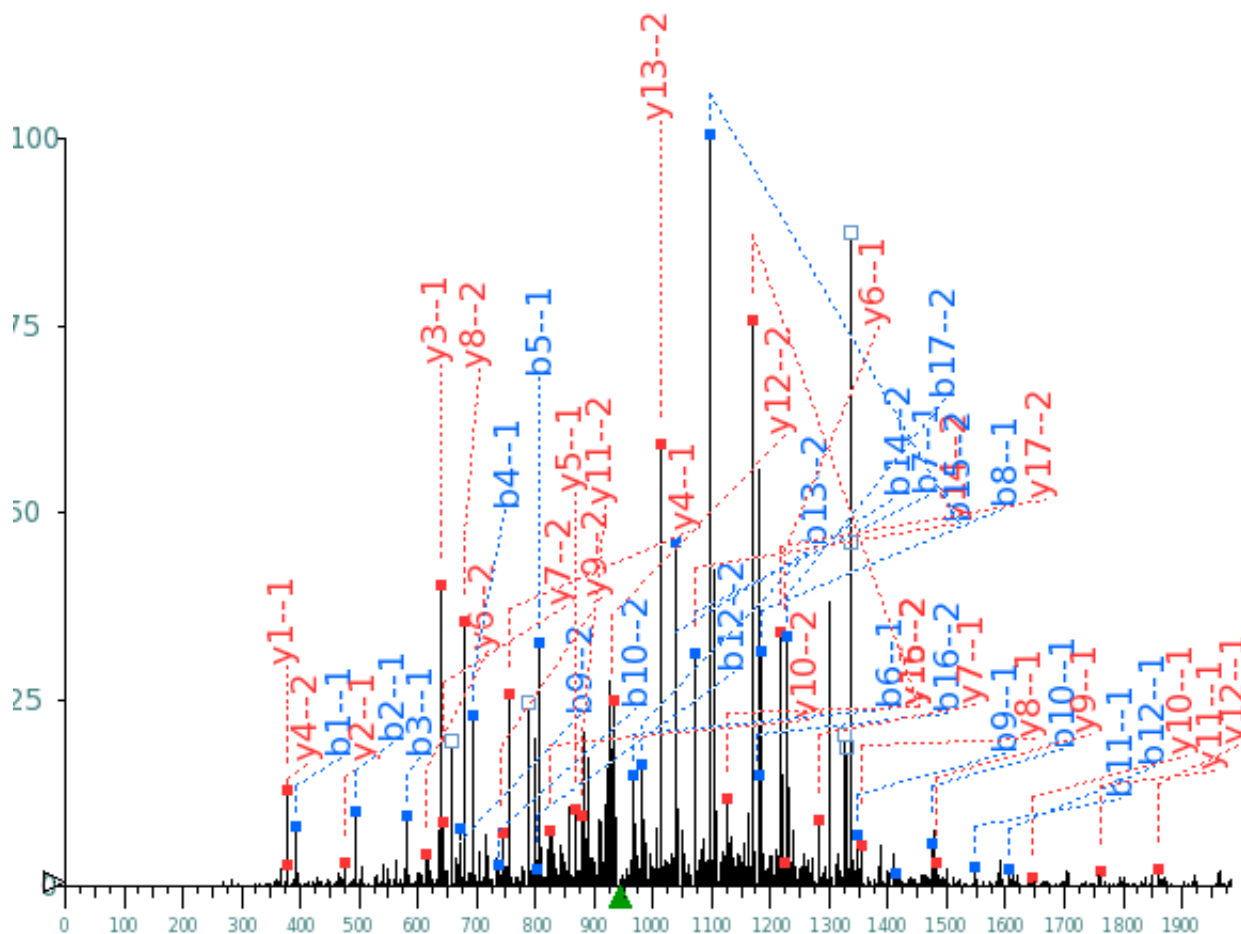

# YVSLIYTNYEAGKDDYVK (+3)

Primary Reference: C7DJS2\_HUMAN

Search ID: 73873

Search Name: 20141113\_QLhumanTMT6lowres\_Obj14178\_CETSA\_1103\_Set2\_Fraction\_10\_2

Scan#: 33602

Observed Mass: 943.5128 (-3 ppm)

PSM Score: 35.6

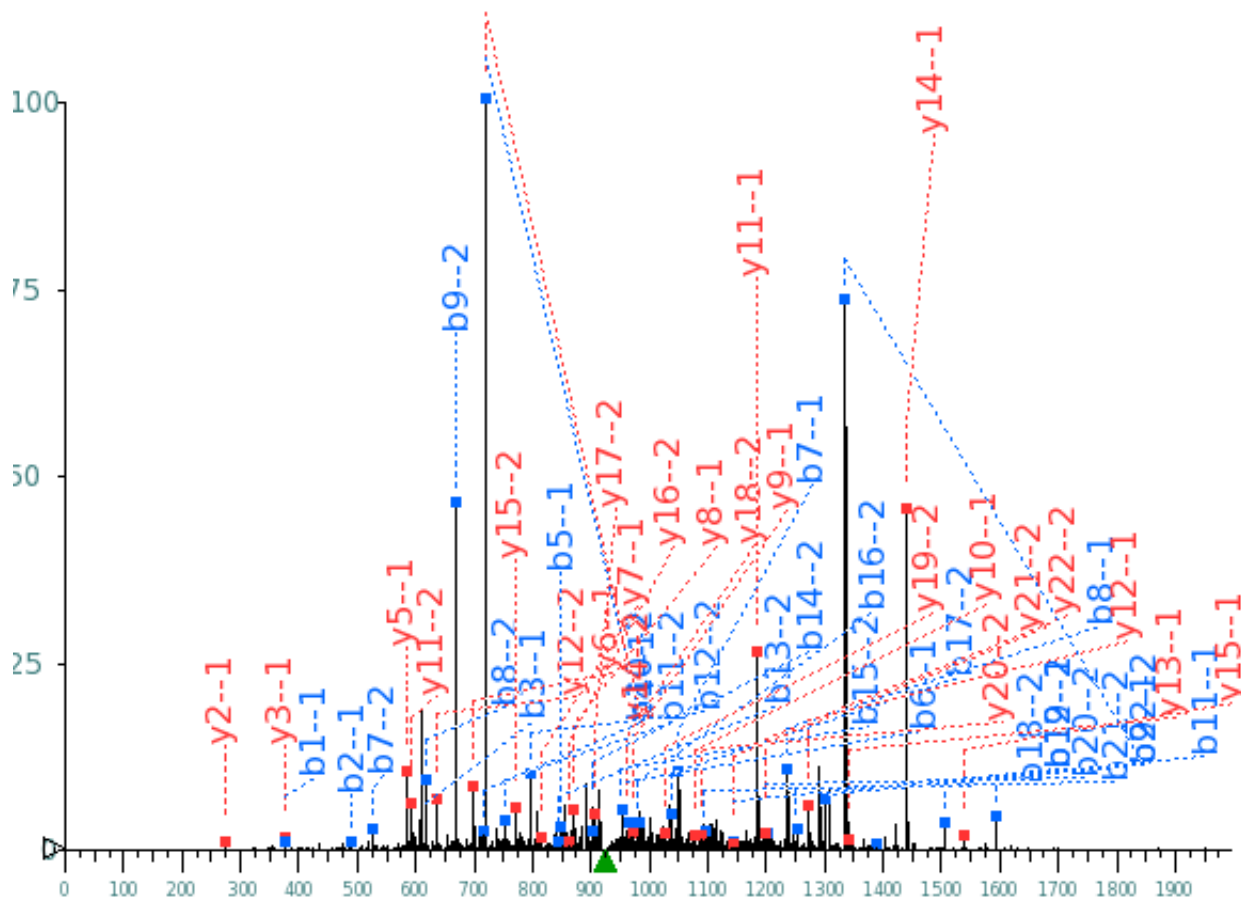

# FLQTEDSWVPASPDTGLDPLTVR (+3)

Primary Reference: C1023\_HUMAN

Search ID: 73873

Search Name: 20141113\_QLhumanTMT6lowres\_Obj14178\_CETSA\_1103\_Set2\_Fraction\_10\_2

Scan#: 43313

Observed Mass: 925.1443 (-2.3 ppm)

PSM Score: 32.44

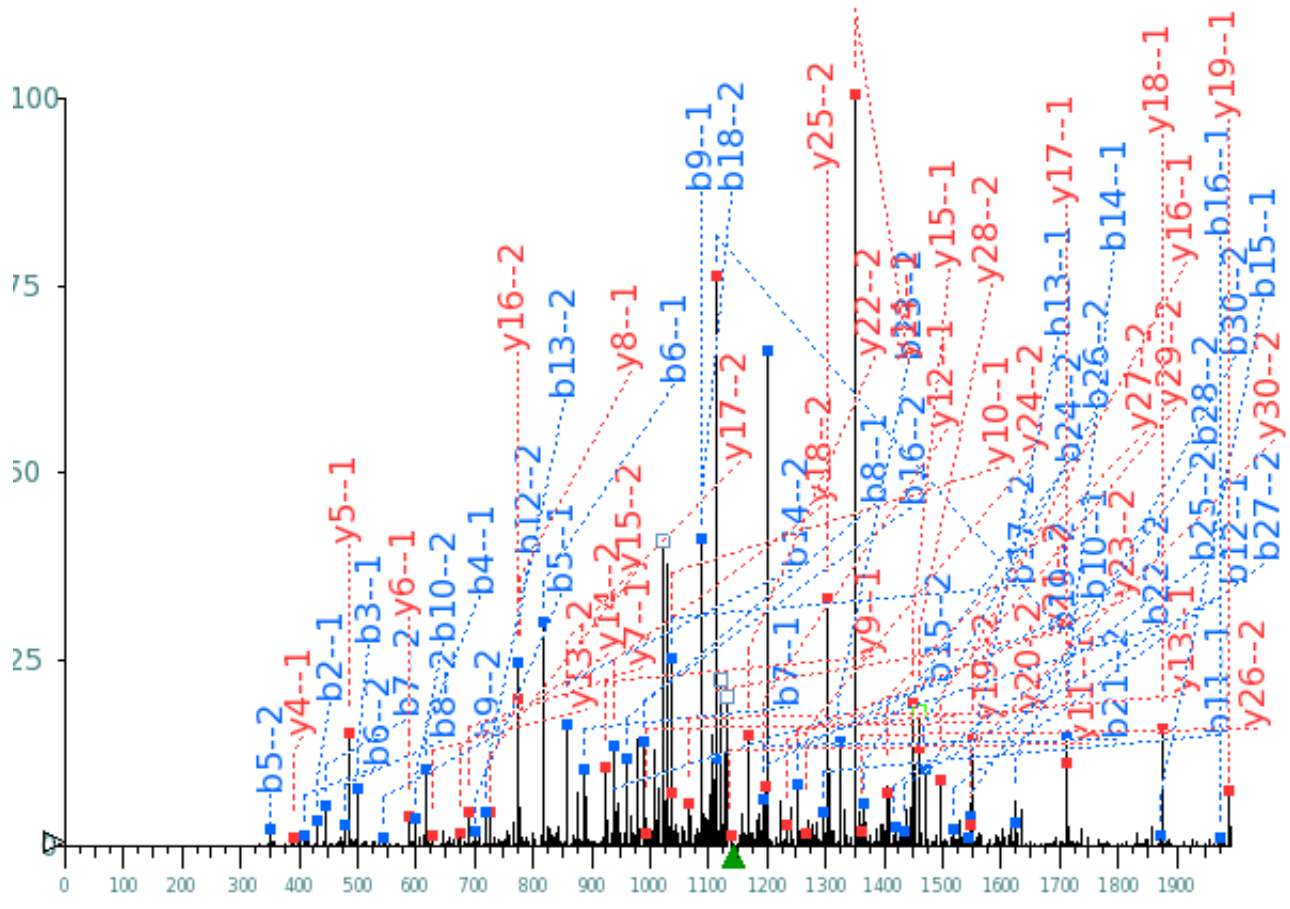

# TVAISDAAQLPHDYCTTPGGTLFSTTPGGTR (+3)

Primary Reference: 4EBP2\_HUMAN

Search ID: 73878

Search Name: 20141113\_QLhumanTMT6lowres\_Obj14178\_CETSA\_1103\_Set2\_Fraction\_11\_2

Scan#: 33006

Observed Mass: 1141.2299 (-4.2 ppm)

PSM Score: 83.7



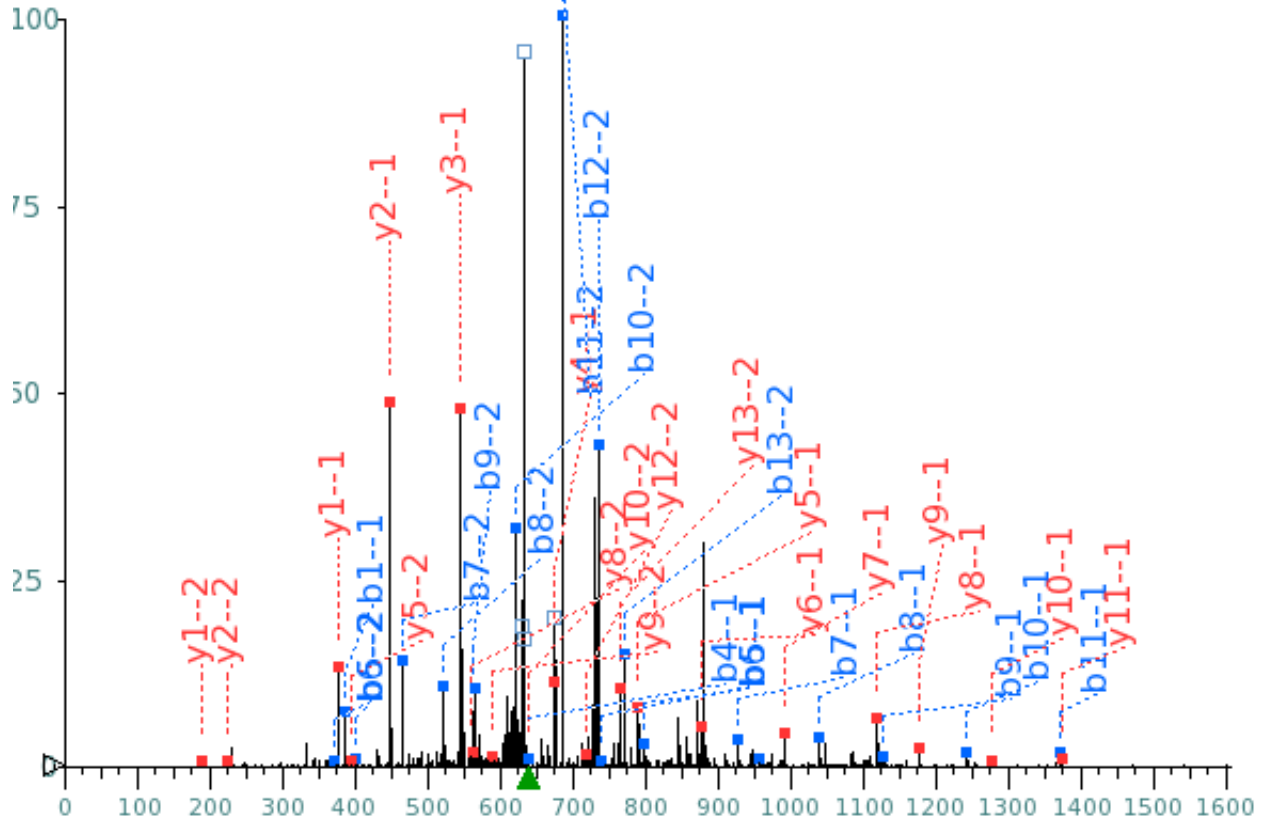

# RPGVTGENSNEVAK (+3)

Primary Reference: POGZ\_HUMAN

Search ID: 73883

Search Name: 20141113\_QLhumanTMT6lowres\_Obj14178\_CETSA\_1103\_Set2\_Fraction\_12

Scan#: 12415

Observed Mass: 639.3582 (0 ppm)

PSM Score: 37.98

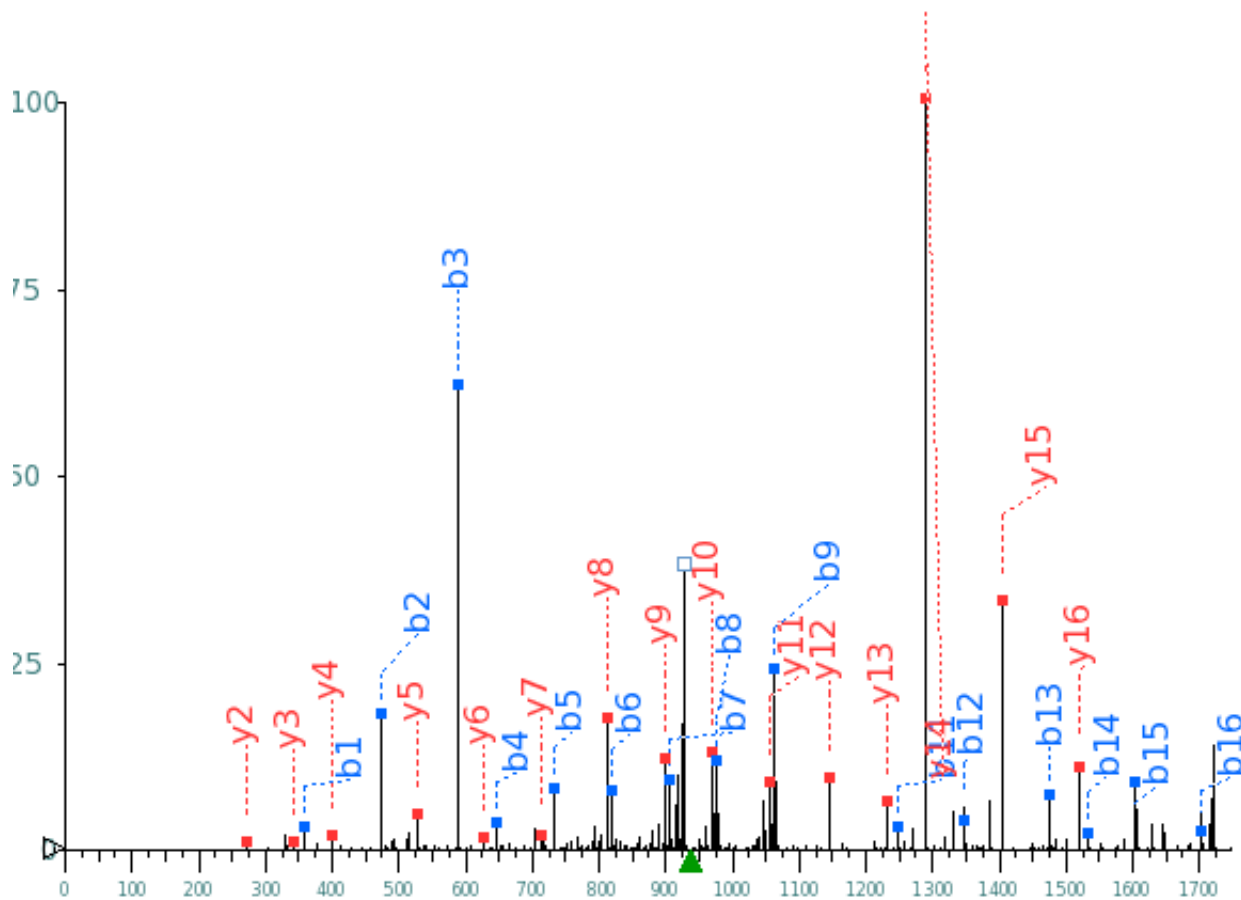

# QDDGSSASPSVQGAPR (+2)

Primary Reference: WASH6\_HUMAN

Search ID: 73883

Search Name: 20141113\_QLhumanTMT6lowres\_Obj14178\_CETSA\_1103\_Set2\_Fraction\_12

Scan#: 12706

Observed Mass: 937.9555 (-0.3 ppm)

PSM Score: 100.15

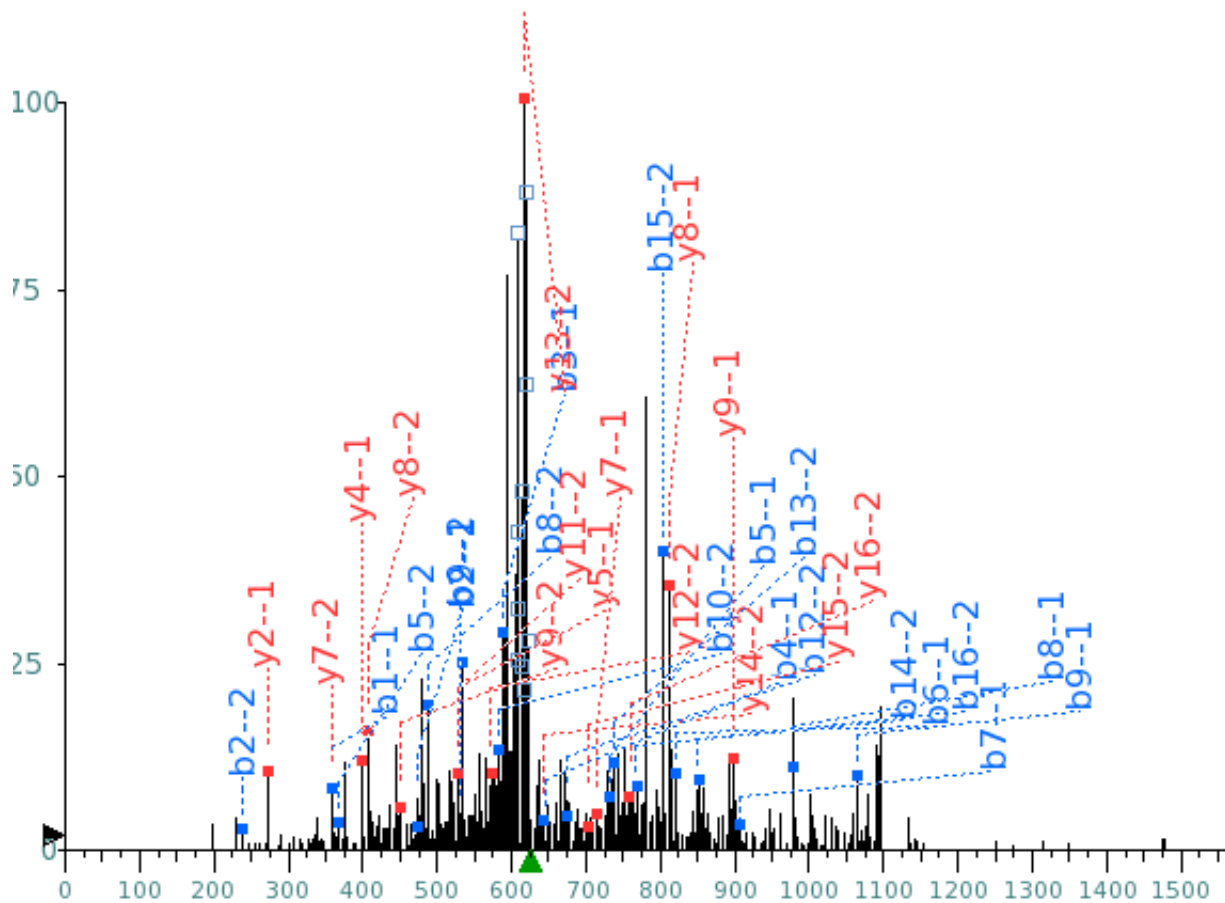

# QDDGSSASPSVQGAPR (+3)

Primary Reference: WASH6\_HUMAN

Search ID: 73883

Search Name: 20141113\_QLhumanTMT6lowres\_Obj14178\_CETSA\_1103\_Set2\_Fraction\_12

Scan#: 12760

Observed Mass: 625.6395 (-0.1 ppm)

PSM Score: 7.68

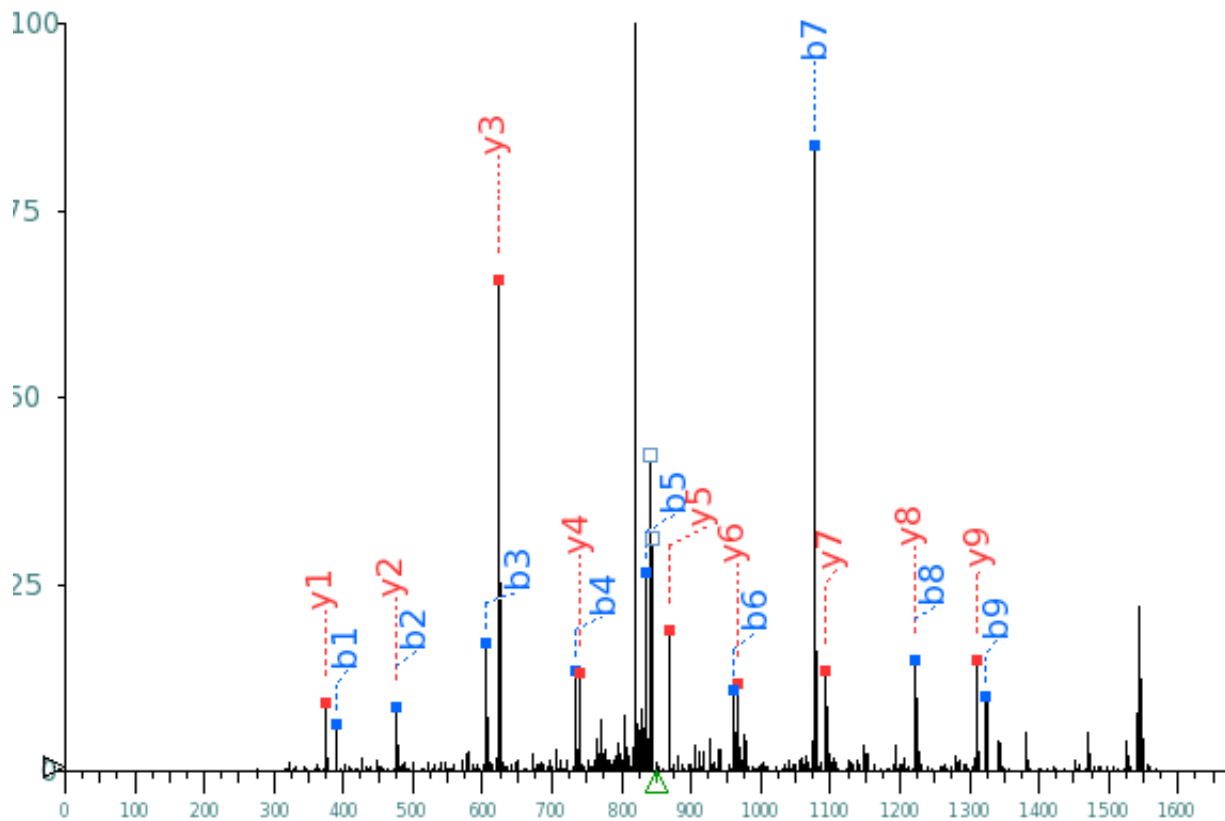

# CSEQVQDFTK (+2)

Primary Reference: COXAM\_HUMAN

Search ID: 73883

Search Name: 20141113\_QLhumanTMT6lowres\_Obj14178\_CETSA\_1103\_Set2\_Fraction\_12

Scan#: 20002

Observed Mass: 850.4374 (-3 ppm)

PSM Score: 43.71

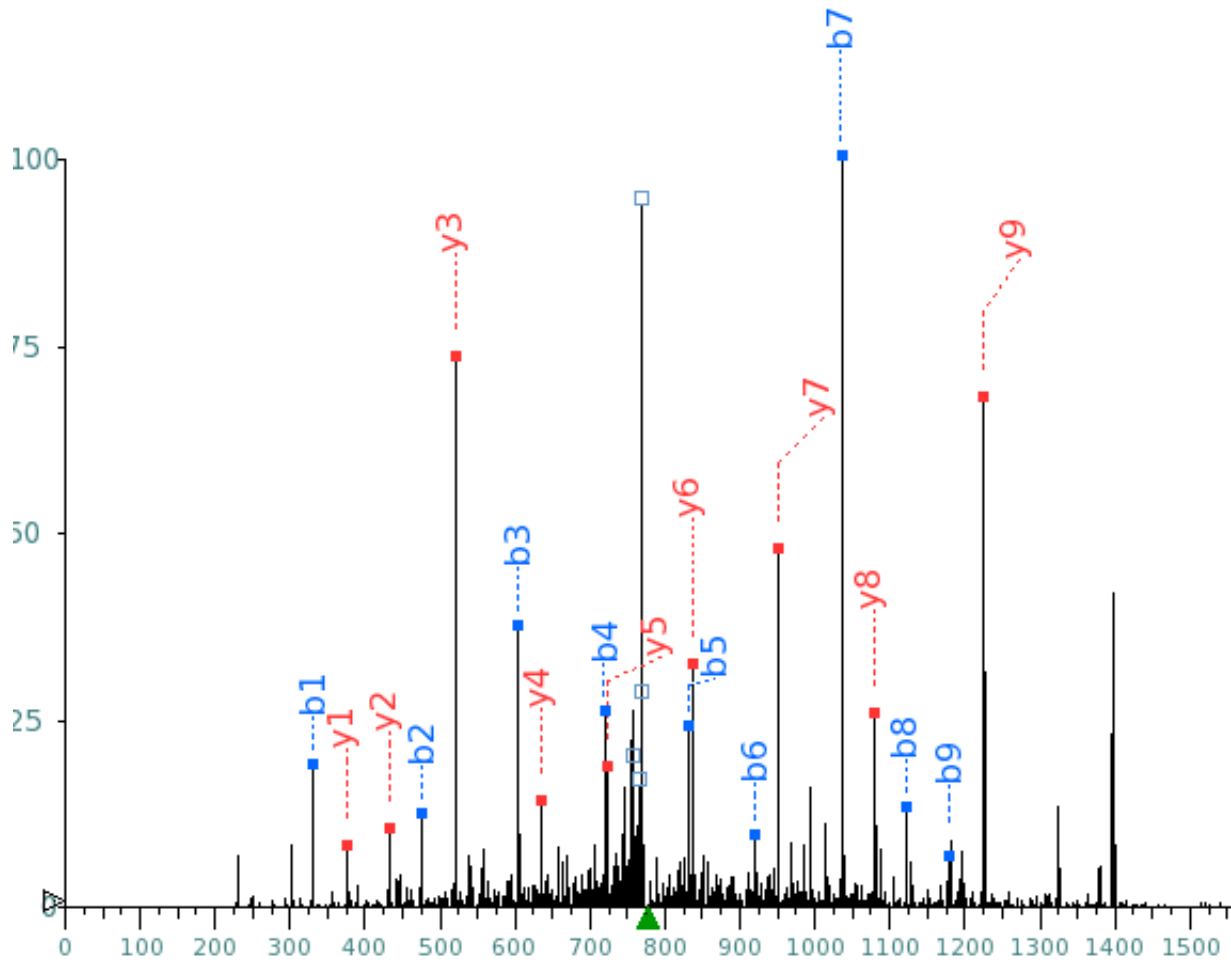

# VFELNSDSGK (+2)

Primary Reference: BSDC1\_HUMAN

Search ID: 73883

Search Name: 20141113\_QLhumanTMT6lowres\_Obj14178\_CETSA\_1103\_Set2\_Fraction\_12

Scan#: 25444

Observed Mass: 777.4302 (-2.8 ppm)

PSM Score: 35.51

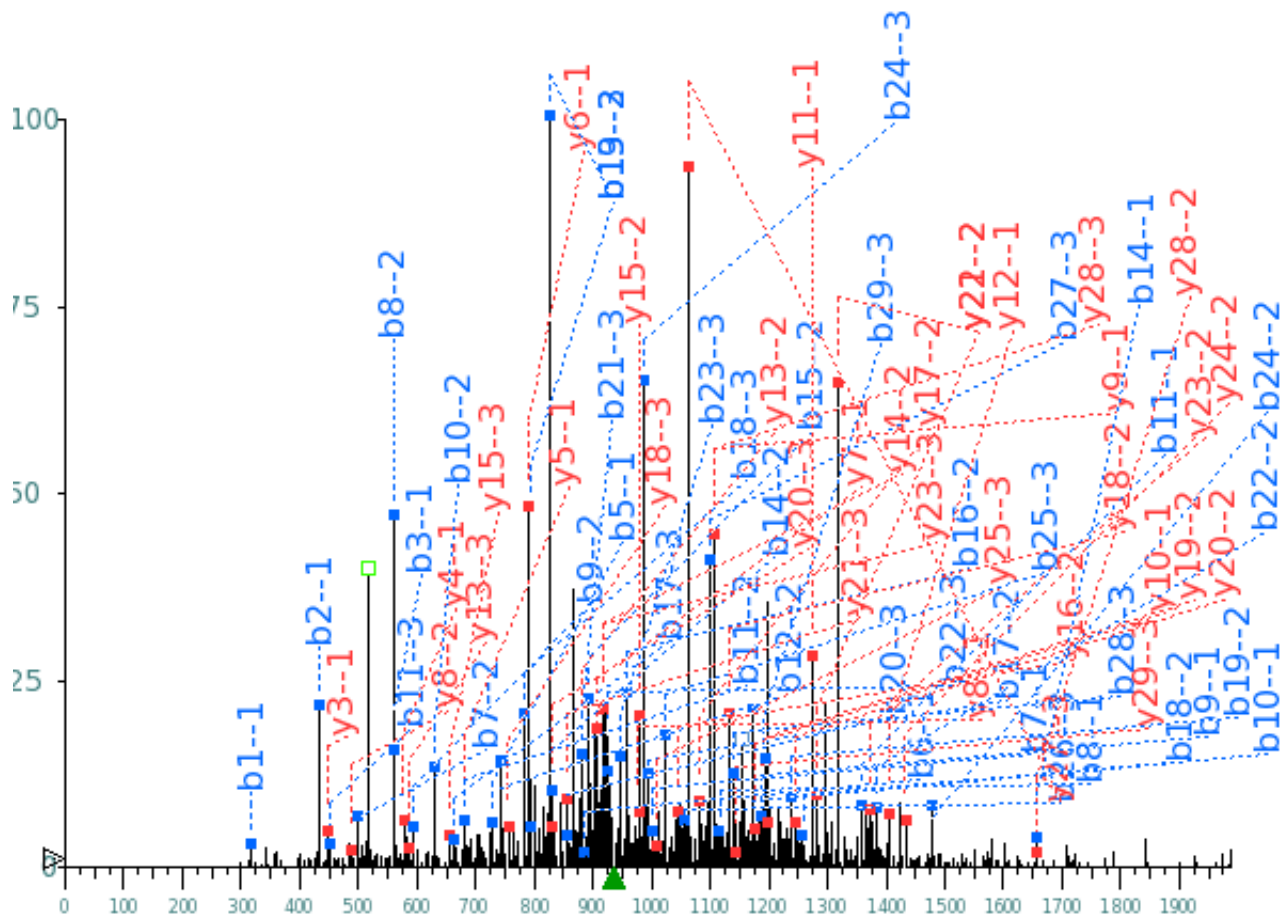

# SDEPARDDAAVETAEAAKEPAEADITELCR (+4)

Primary Reference: BL1S2\_HUMAN

Search ID: 73883

Search Name: 20141113\_QLhumanTMT6lowres\_Obj14178\_CETSA\_1103\_Set2\_Fraction\_12

Scan#: 29486

Observed Mass: 937.4531 (-4.2 ppm)

PSM Score: 38.96

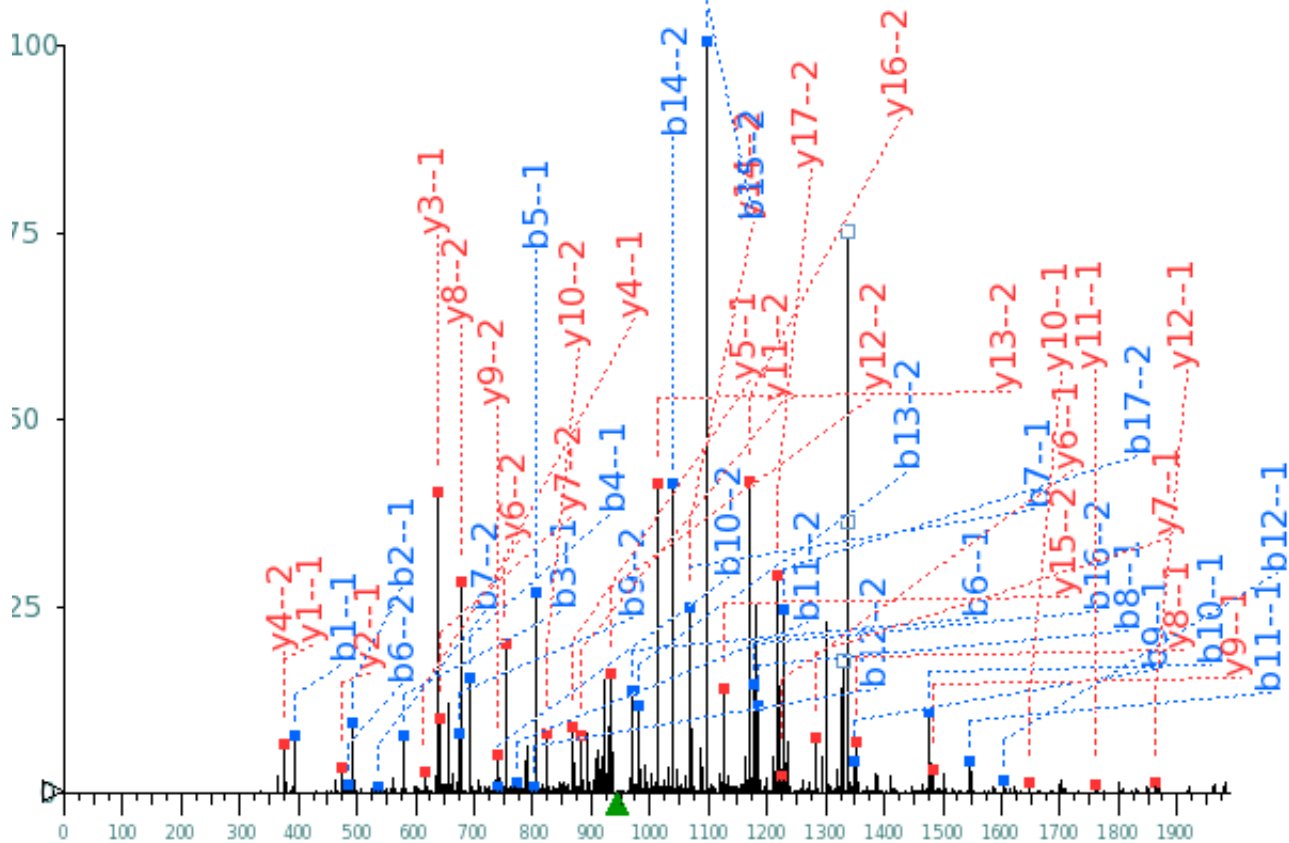

# YVSLIYTNYEAGKDDYVK (+3)

Primary Reference: C7DJS2\_HUMAN

Search ID: 73883

Search Name: 20141113\_QLhumanTMT6lowres\_Obj14178\_CETSA\_1103\_Set2\_Fraction\_12

Scan#: 32863

Observed Mass: 943.5125 (-3.3 ppm)

PSM Score: 53.86

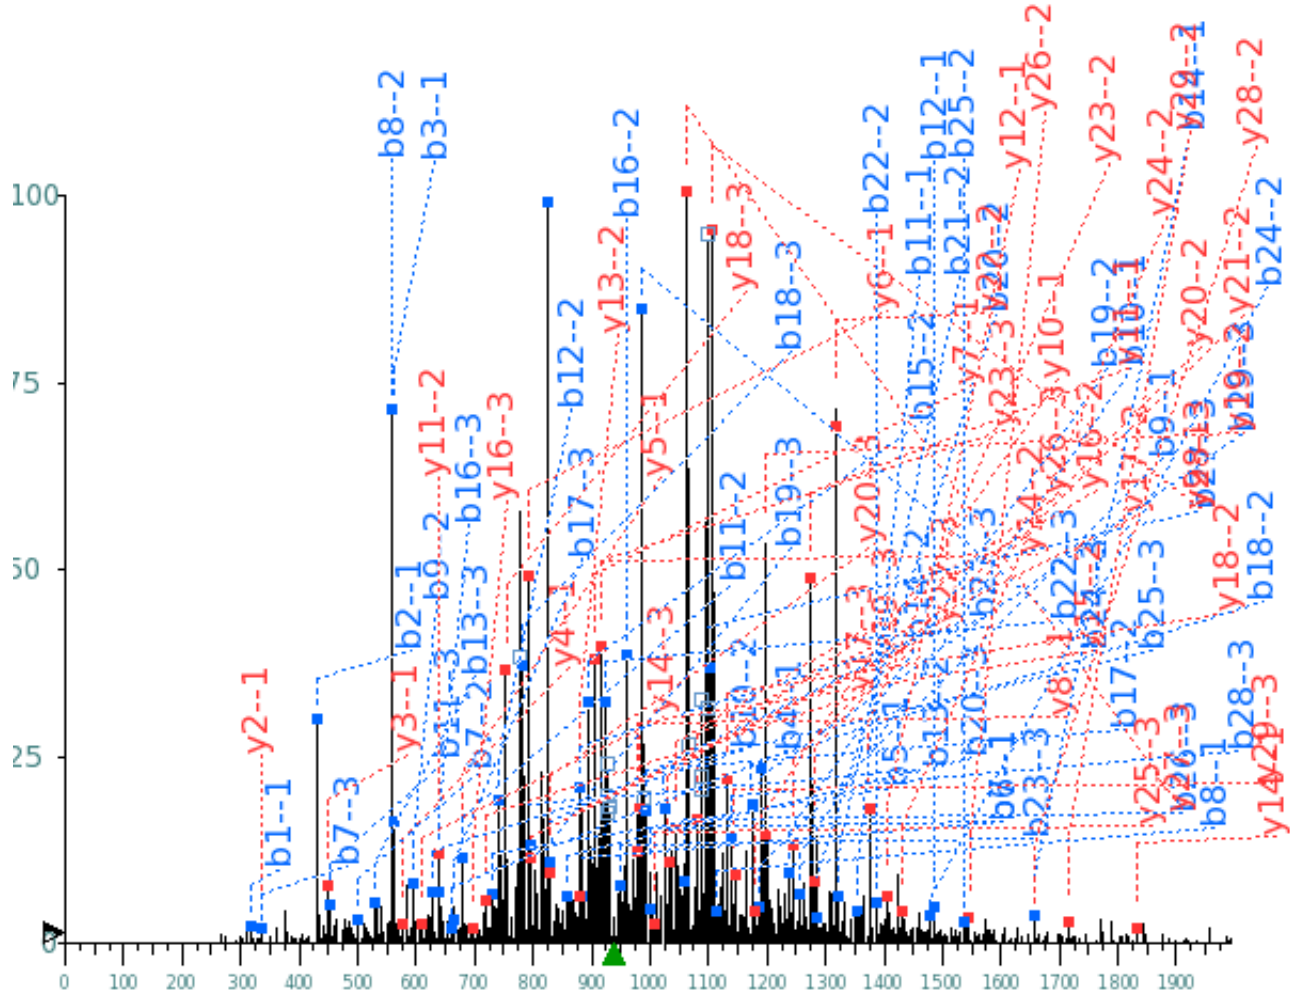

# SDEPARDDAAVETAEAAKEPAEADITELCR (+4)

Primary Reference: BL1S2\_HUMAN

Search ID: 73888

Search Name: 20141113\_QLhumanTMT6lowres\_Obj14178\_CETSA\_1103\_Set2\_Fraction\_13

Scan#: 29720

Observed Mass: 937.4542 (-3.1 ppm)

PSM Score: 34.46



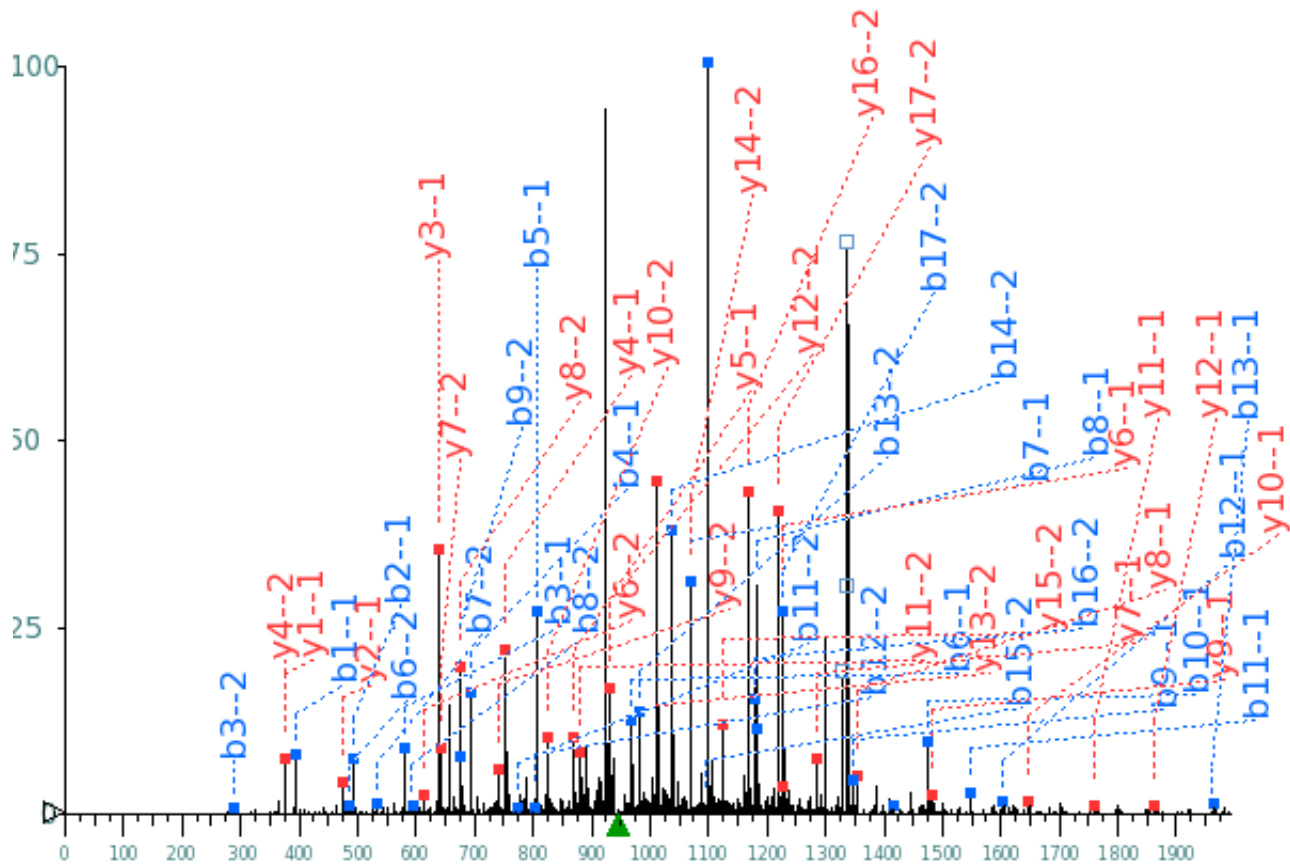

# YVSLIYTNYEAGKDDYVK (+3)

Primary Reference: C7DJS2\_HUMAN

Search ID: 73888

Search Name: 20141113\_QLhumanTMT6lowres\_Obj14178\_CETSA\_1103\_Set2\_Fraction\_13

Scan#: 33162

Observed Mass: 943.513 (-2.9 ppm)

PSM Score: 41.98

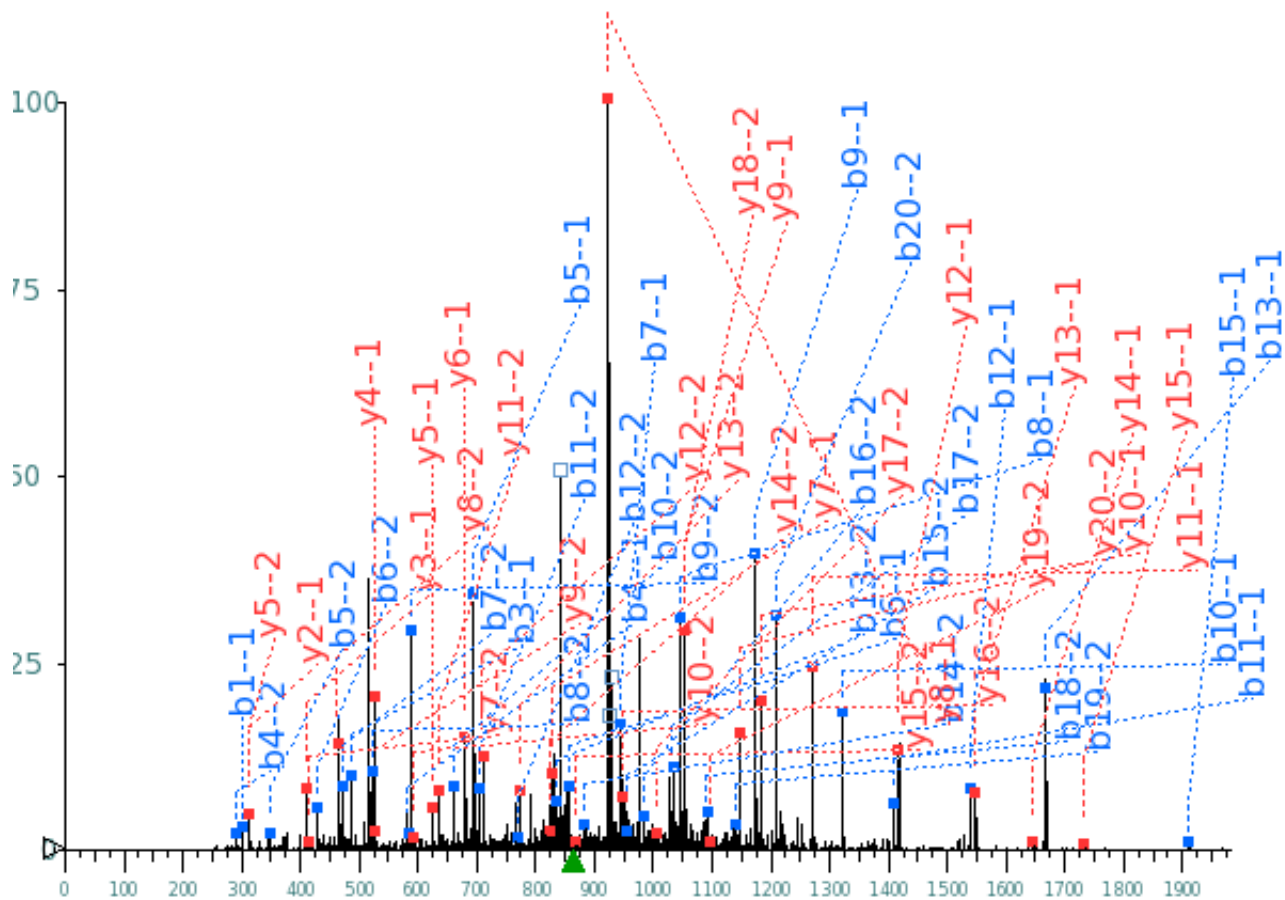

# APSPLYSVEFSEEPFGVIVHR (+3)

Primary Reference: B7Z5V6\_HUMAN

Search ID: 73888

Search Name: 20141113\_QLhumanTMT6lowres\_Obj14178\_CETSA\_1103\_Set2\_Fraction\_13

Scan#: 38175

Observed Mass: 863.7864 (-4.1 ppm)

PSM Score: 60.19

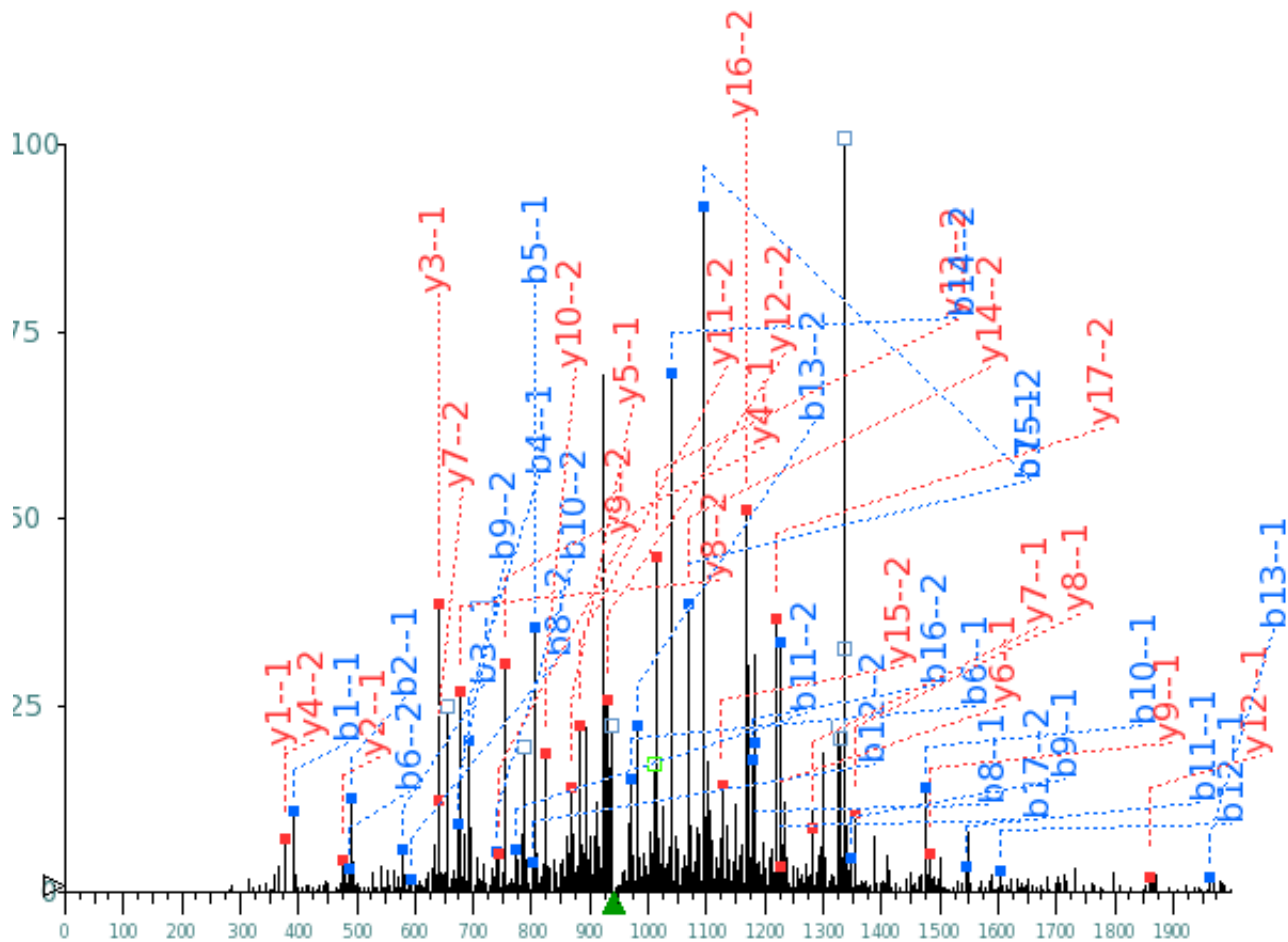

# YVSLIYTNYEAGKDDYVK (+3)

Primary Reference: C7DJS2\_HUMAN

Search ID: 73893

Search Name: 20141113\_QLhumanTMT6lowres\_Obj14178\_CETSA\_1103\_Set2\_Fraction\_14

Scan#: 33322

Observed Mass: 943.5136 (-2.2 ppm)

PSM Score: 42.25

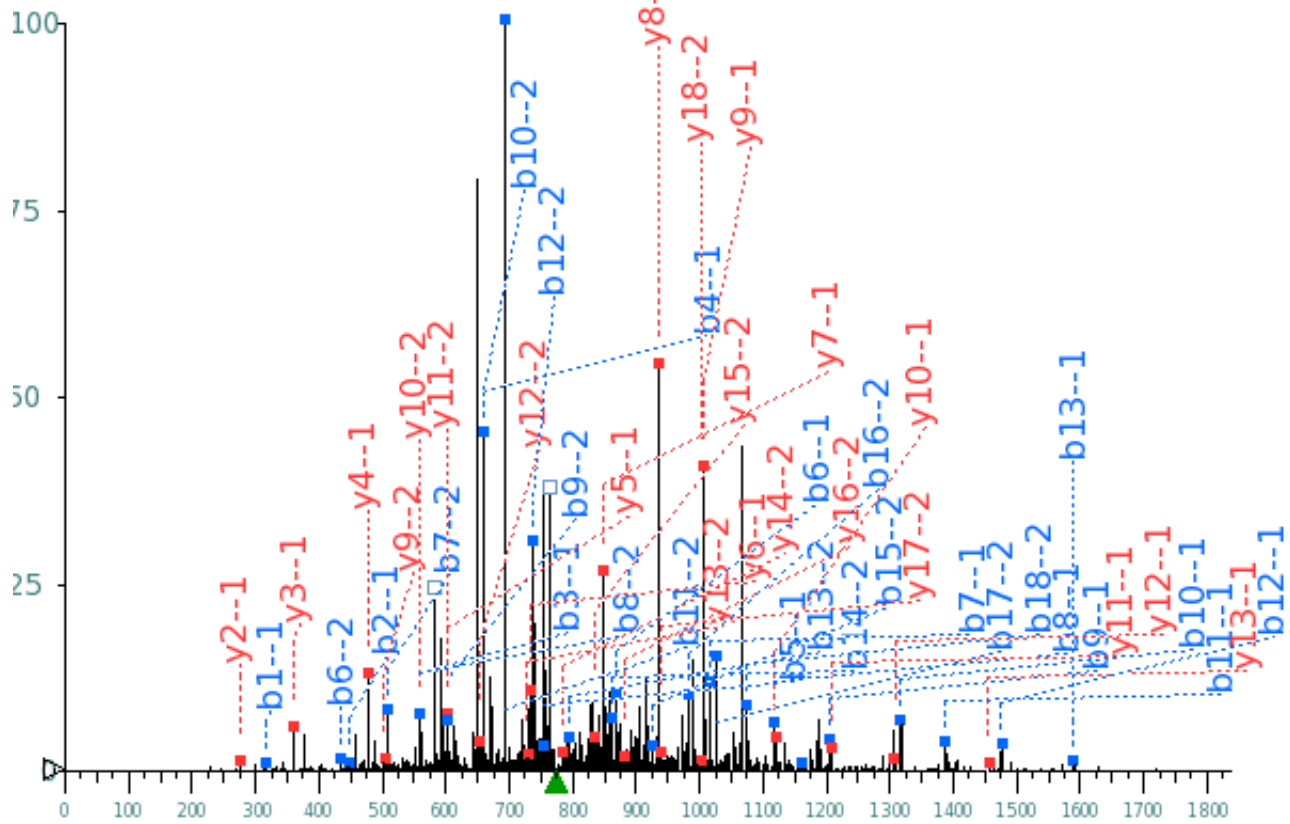

# SEIVPLFTSLASDEQDSVR (+3)

Primary Reference: 2AAB\_HUMAN

Search ID: 73893

Search Name: 20141113\_QLhumanTMT6lowres\_Obj14178\_CETSA\_1103\_Set2\_Fraction\_14

Scan#: 40423

Observed Mass: 774.7363 (-3.6 ppm)

PSM Score: 59.26

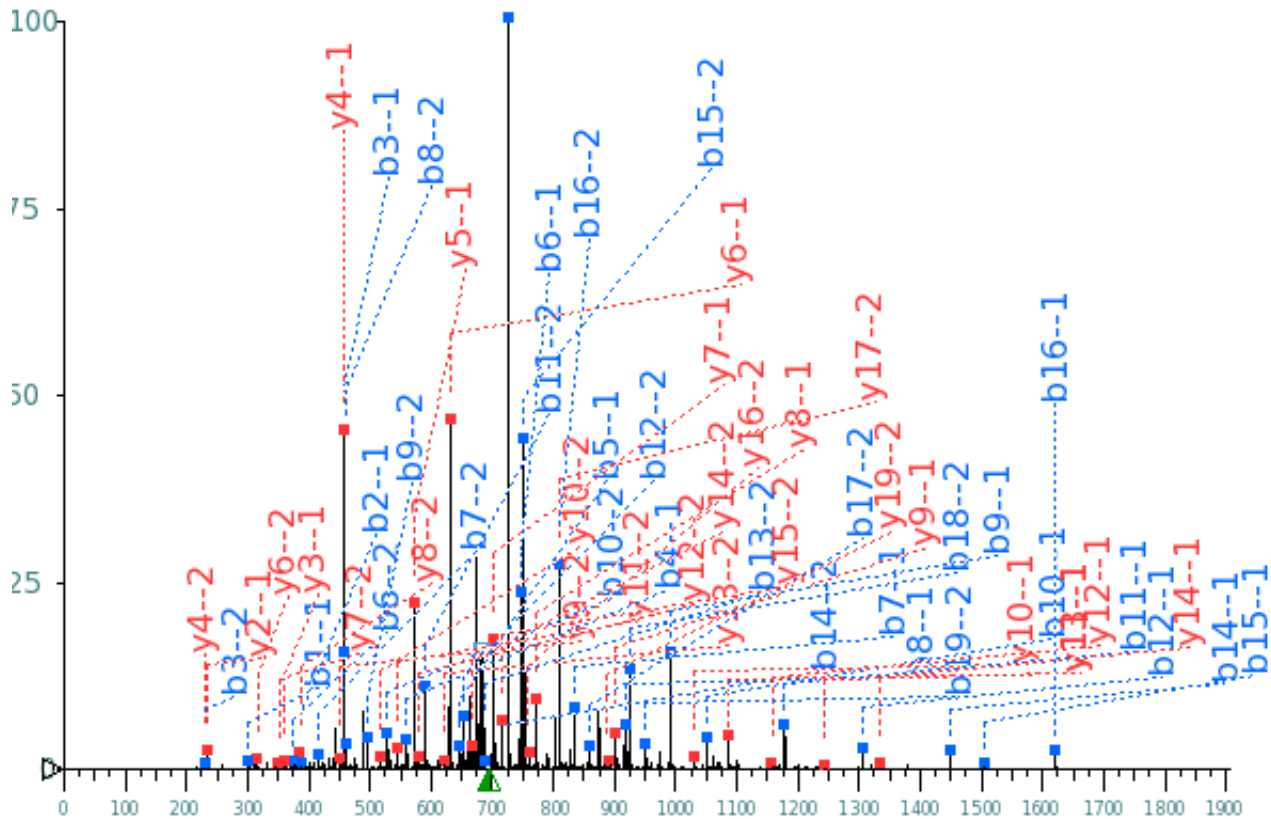

# ASATSVSSAGEQAAGDPEGR (+3)

Primary Reference: PANK2\_HUMAN

Search ID: 73902

Search Name: 20141113\_QLhumanTMT6lowres\_Obj14178\_CETSA\_1103\_Set2\_Fraction\_16

Scan#: 15314

Observed Mass: 693.0027 (-2.8 ppm)

PSM Score: 66.15

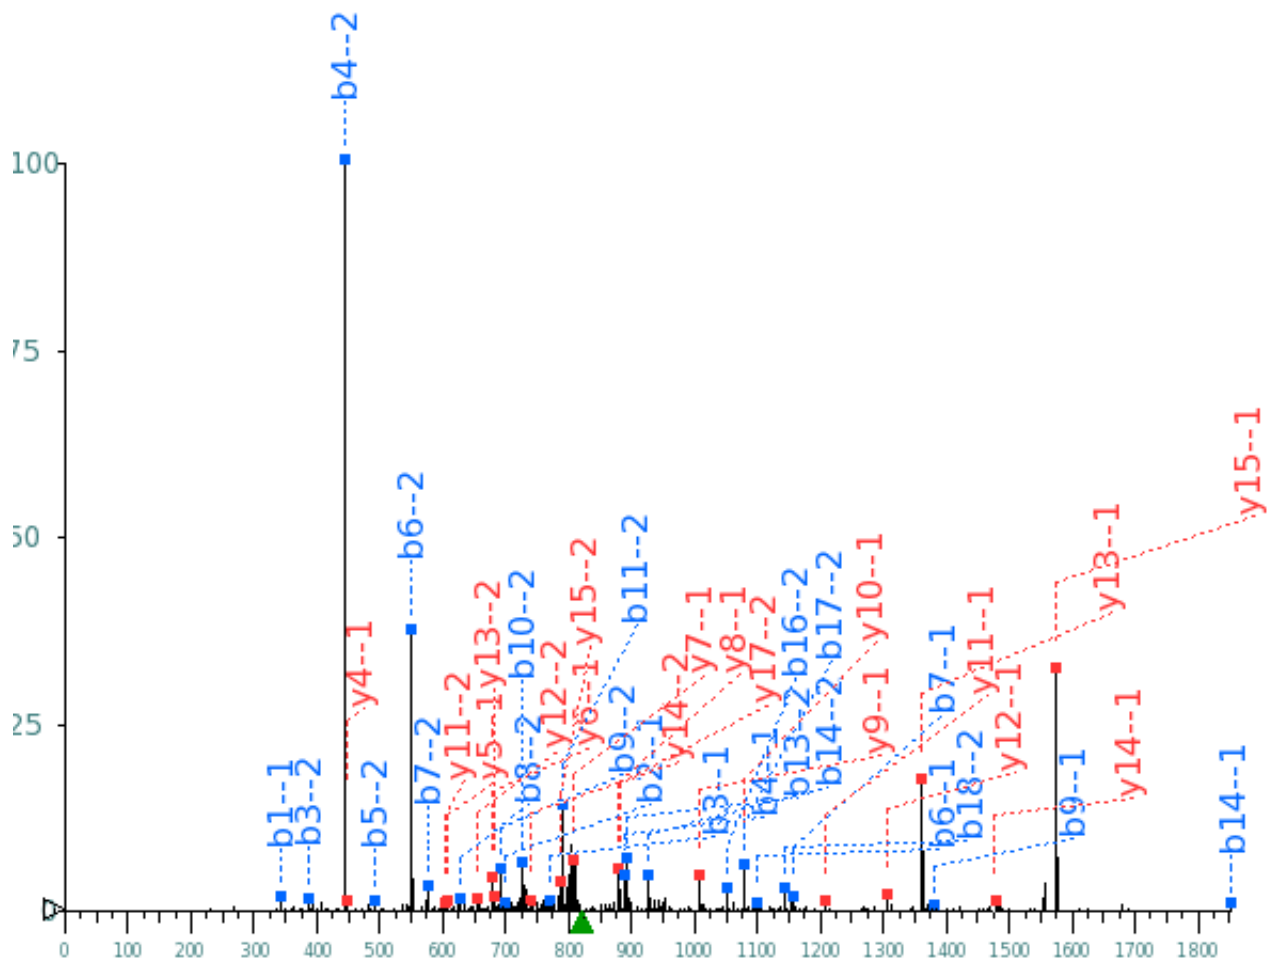

# IKADPDGPEAQAEACSGER (+3)

Primary Reference: NHP2\_HUMAN

Search ID: 73902

Search Name: 20141113\_QLhumanTMT6lowres\_Obj14178\_CETSA\_1103\_Set2\_Fraction\_16

Scan#: 16790

Observed Mass: 820.4114 (-1.7 ppm)

PSM Score: 50.36

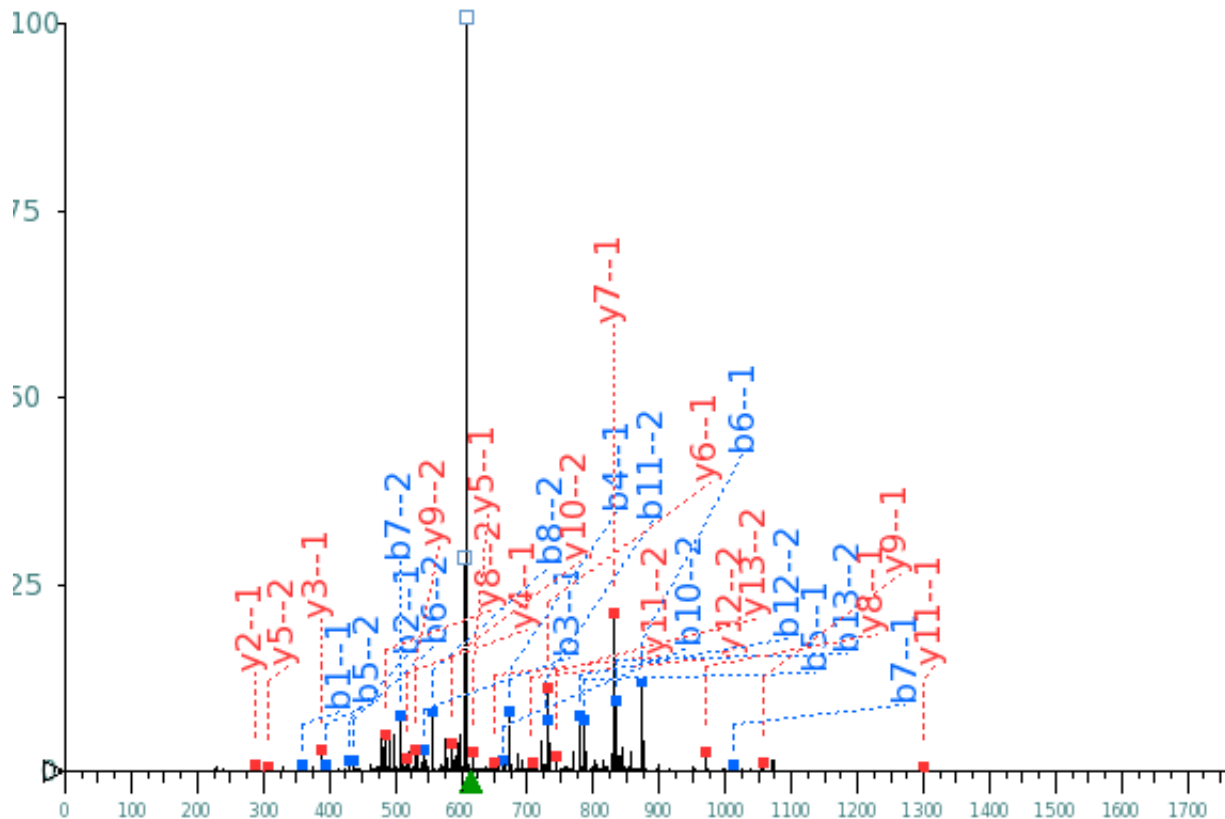

# EALENSHTNTEVLR (+3)

Primary Reference: CHM4C\_HUMAN

Search ID: 73909

Search Name: 20141113\_QLhumanTMT6lowres\_Obj14178\_CETSA\_1103\_Set1\_Fraction\_01\_3pct

Scan#: 13564

Observed Mass: 614.6549 (-2.8 ppm)

PSM Score: 34.62

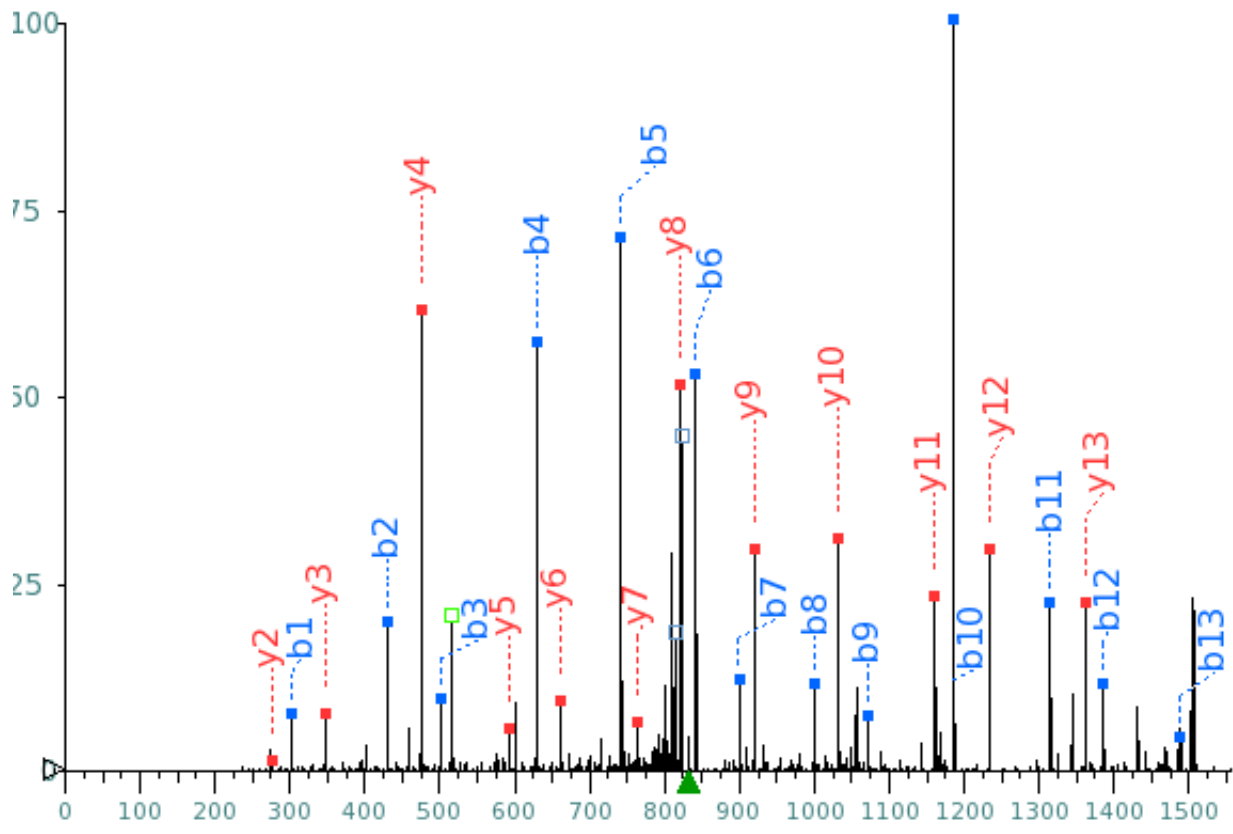

# AQAELVGTAEATR (+2)

Primary Reference: ATPD\_HUMAN

Search ID: 73909

Search Name: 20141113\_QLhumanTMT6lowres\_Obj14178\_CETSA\_1103\_Set1\_Fraction\_01\_3pct

Scan#: 17852

Observed Mass: 830.9358 (-3.6 ppm)

PSM Score: 80.64



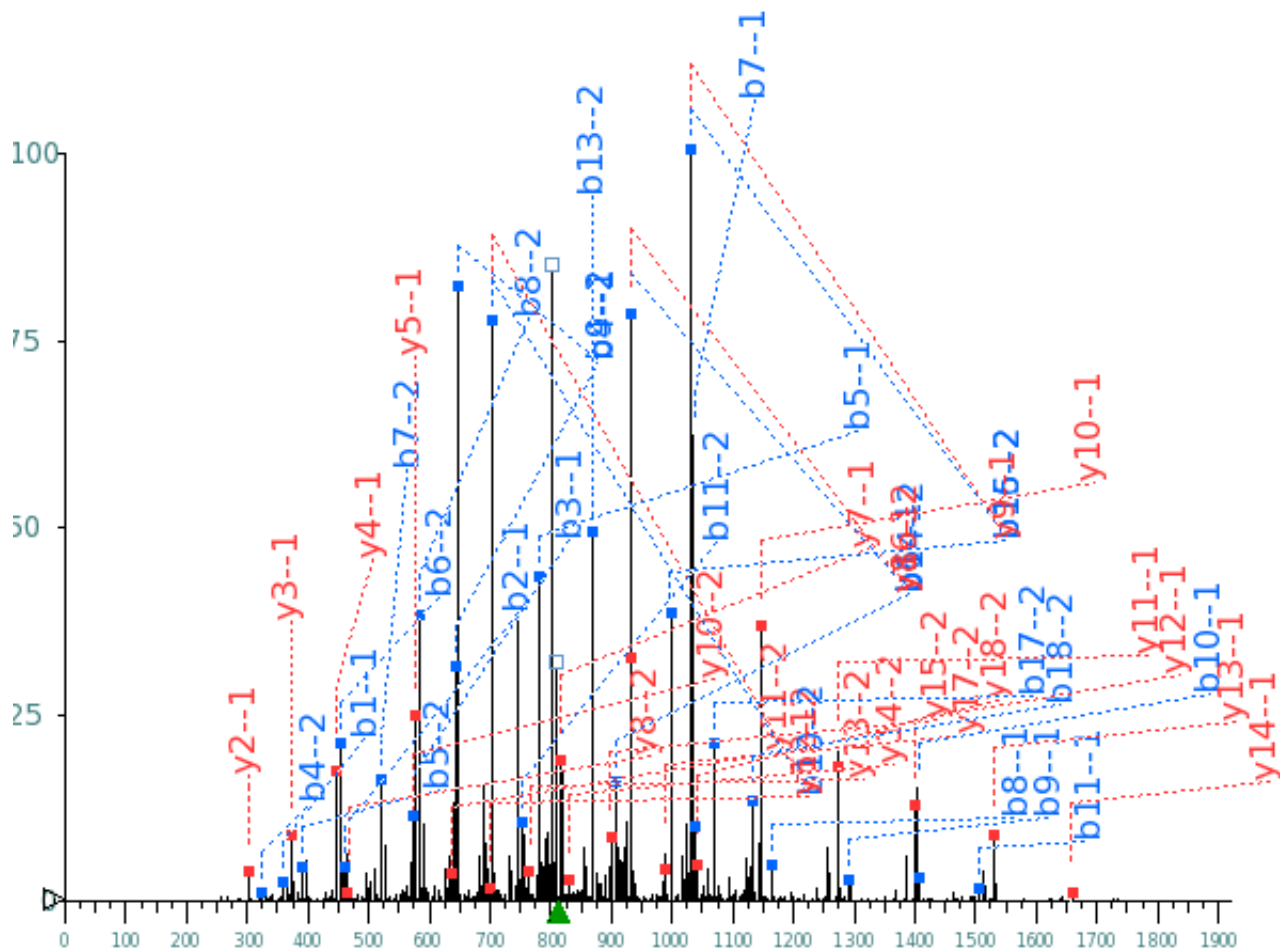

# QTIAHQQQQLTNLQMAAQR (+3)

Primary Reference: E9PMU7\_HUMAN

Search ID: 73909

Search Name: 20141113\_QLhumanTMT6lowres\_Obj14178\_CETSA\_1103\_Set1\_Fraction\_01\_3pct

Scan#: 18358

Observed Mass: 813.0994 (-3.9 ppm)

PSM Score: 81.43

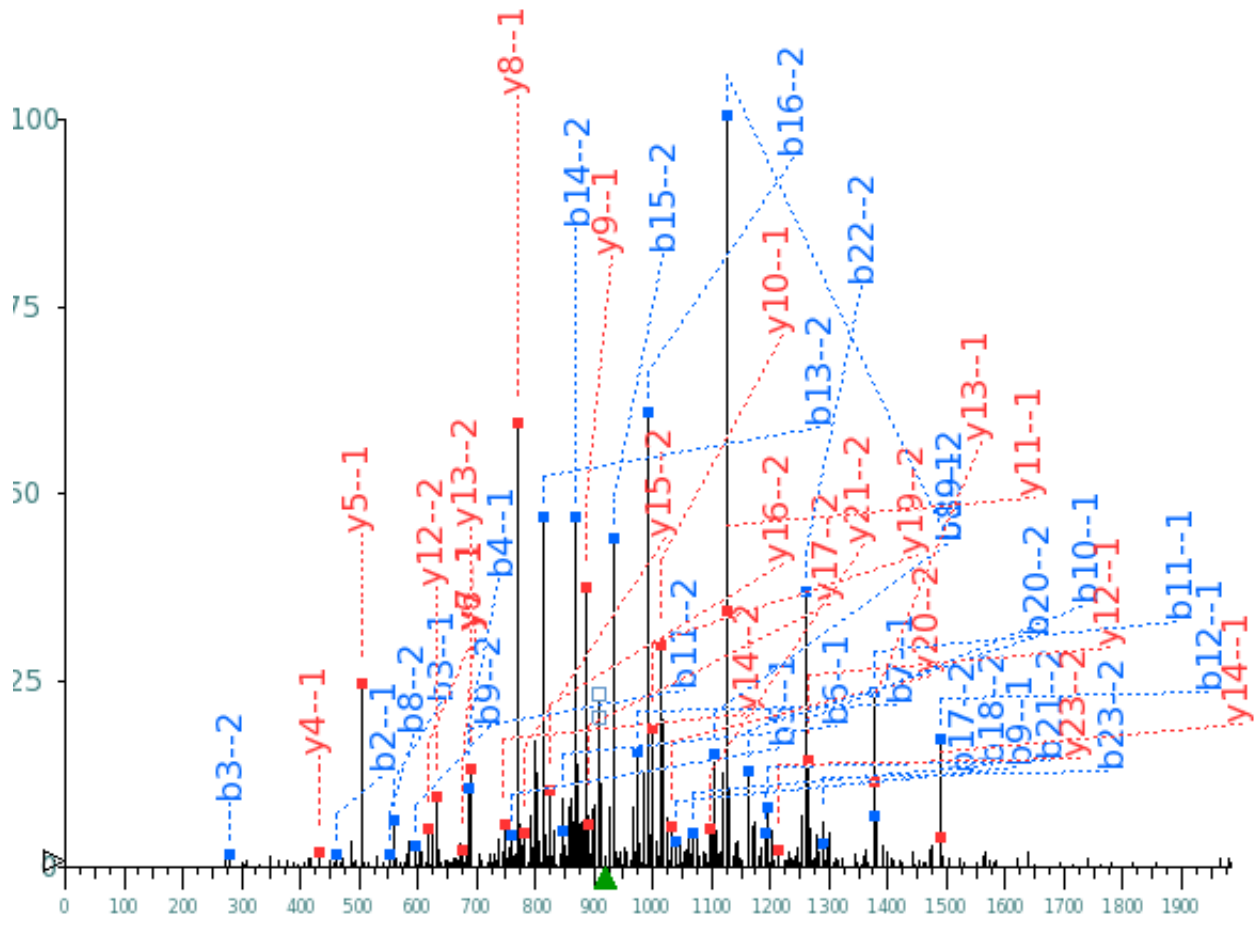

# TQVEASEESALNHLQNP GDAAEGR (+3)

Primary Reference: MOFA1\_HUMAN

Search ID: 73909

Search Name: 20141113\_QLhumanTMT6lowres\_Obj14178\_CETSA\_1103\_Set1\_Fraction\_01\_3pct

Scan#: 22605

Observed Mass: 918.1113 (-5.1 ppm)

PSM Score: 75.38

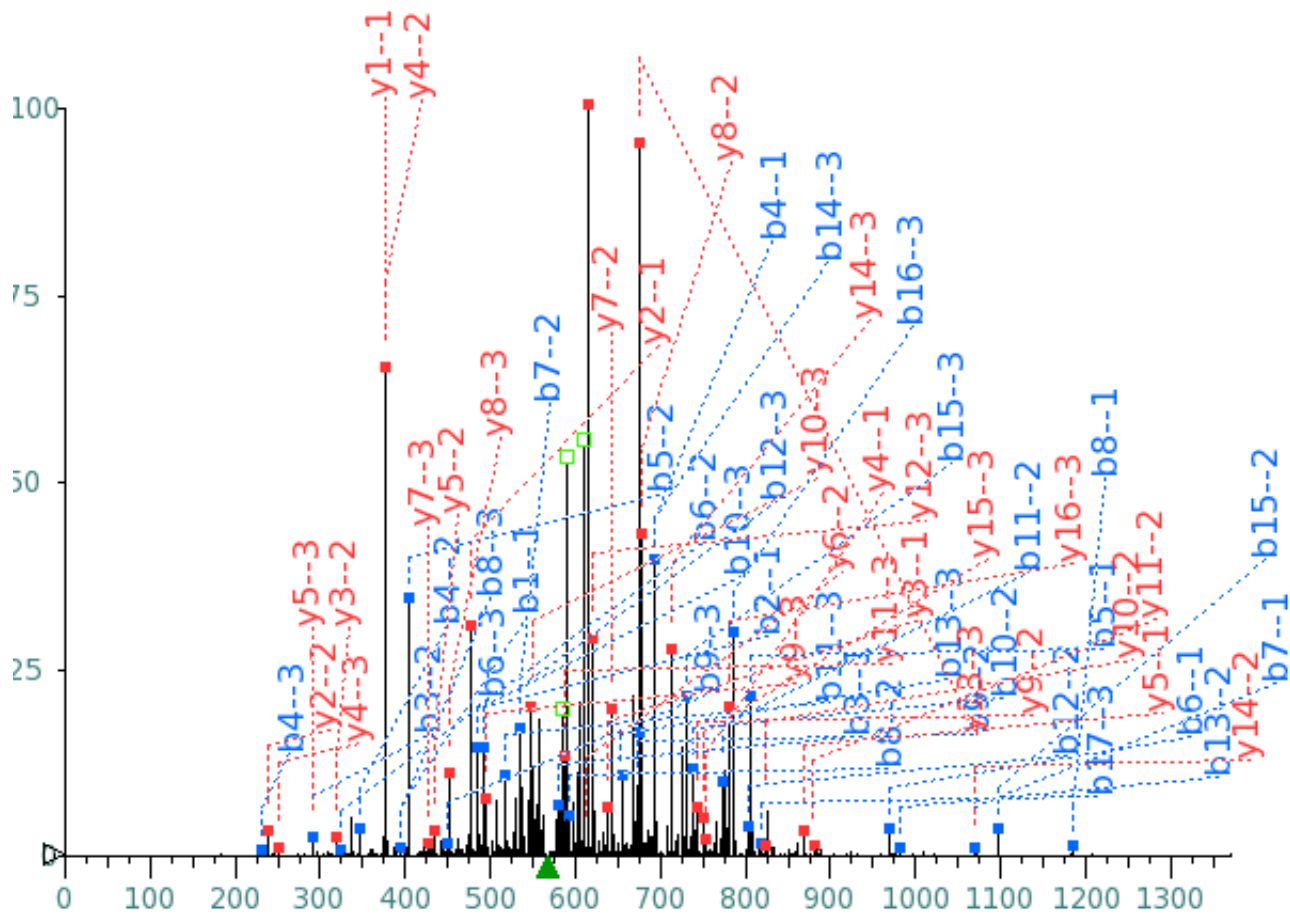

# YVSLIYTNYEAGKDDYVK (+5)

Primary Reference: C7DJS2\_HUMAN

Search ID: 73909

Search Name: 20141113\_QLhumanTMT6lowres\_Obj14178\_CETSA\_1103\_Set1\_Fraction\_01\_3pct

Scan#: 31353

Observed Mass: 566.5104 (-3.5 ppm)

PSM Score: 25.59

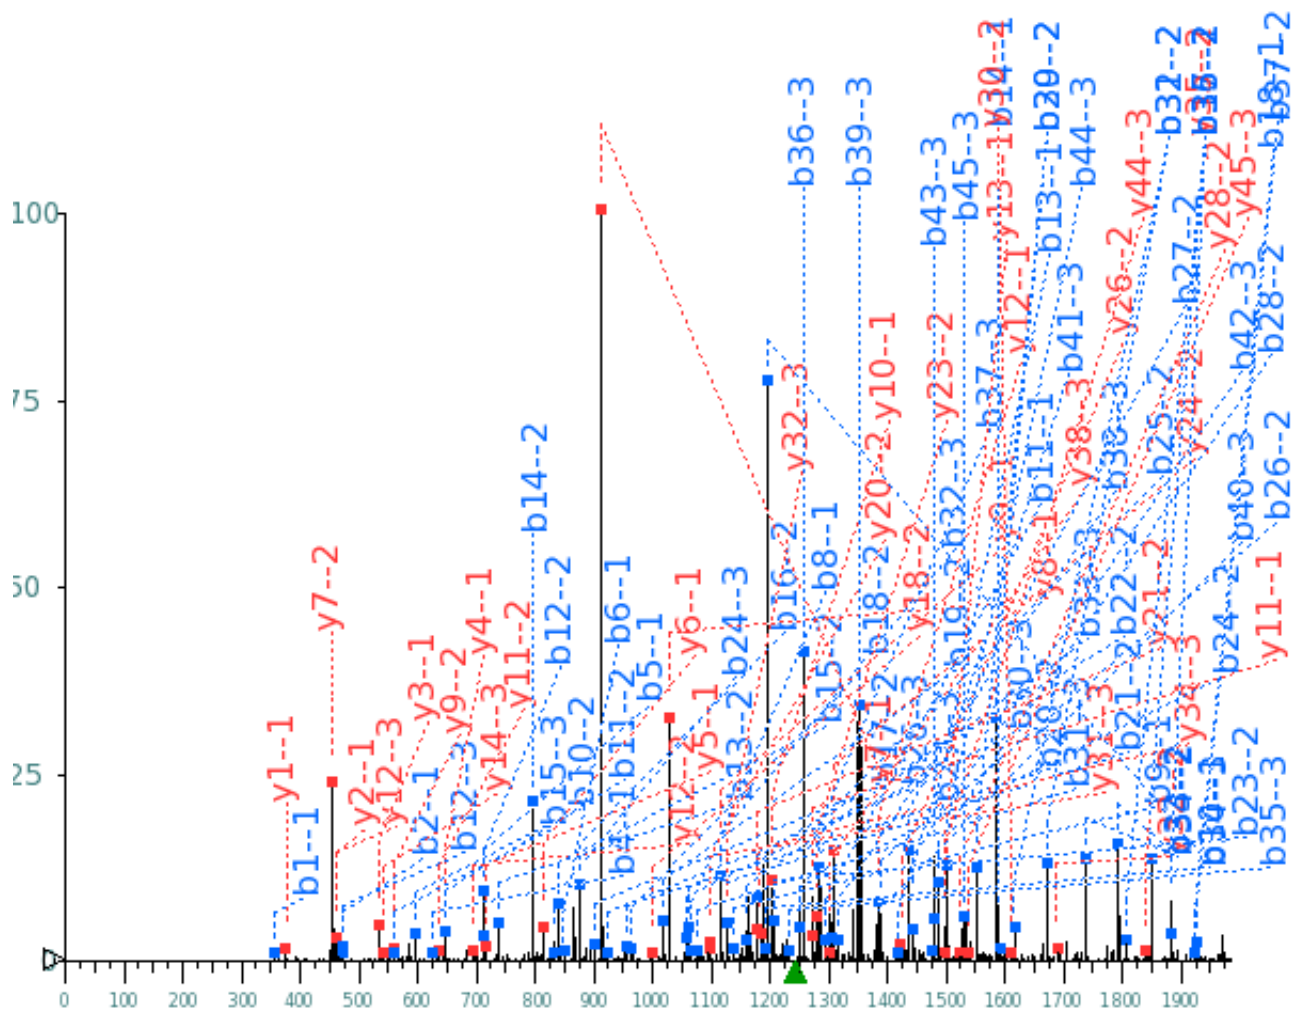

**QLPGSHSEAGVQGLSAGDDSETGSDCVTQAGLQLLASSDPPALASK (+4)**

Primary Reference: F5GZS6\_HUMAN

Search ID: 73909

Search Name: 20141113\_QLhumanTMT6lowres\_Obj14178\_CETSA\_1103\_Set1\_Fraction\_01\_3pct

Scan#: 37761

Observed Mass: 1242.6144 (-4.5 ppm)

PSM Score: 94.3

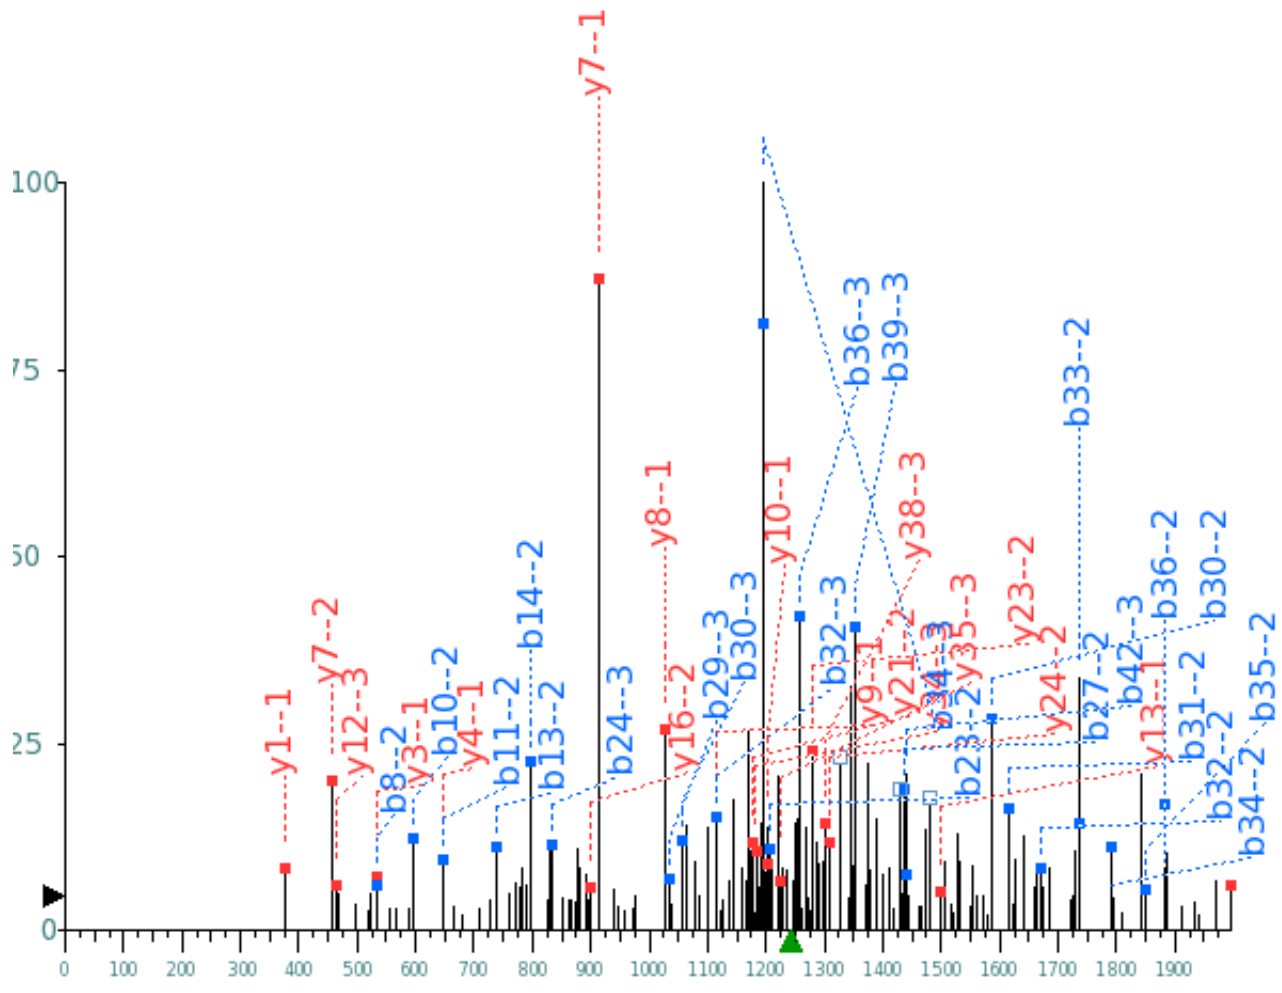

**QLPGSHSEAGVQGLSAGDDSETGSDCVTQAGLQLLASSDPPALASK (+4)**

Primary Reference: F5GZS6\_HUMAN  
 Search ID: 73909  
 Search Name: 20141113\_QLhumanTMT6lowres\_Obj14178\_CETSA\_1103\_Set1\_Fraction\_01\_3pct  
 Scan#: 37929  
 Observed Mass: 1242.6162 (-3.1 ppm)  
 PSM Score: 38.53

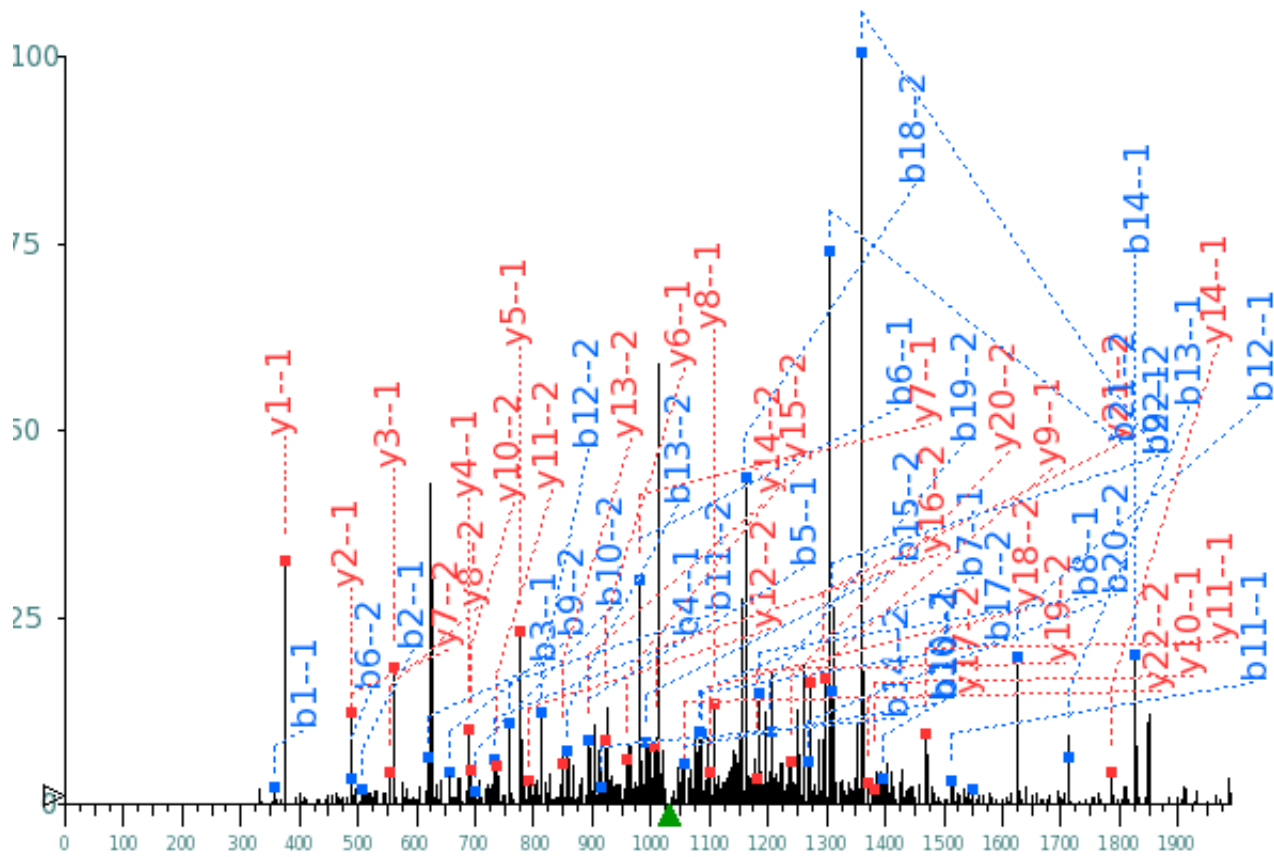

# QFLDCSTTQSDL<sup>SL</sup>CEGFSEALK (+3)

Primary Reference: CHC10\_HUMAN

Search ID: 73909

Search Name: 20141113\_QLhumanTMT6lowres\_Obj14178\_CETSA\_1103\_Set1\_Fraction\_01\_3pct

Scan#: 38384

Observed Mass: 1032.1707 (-4.4 ppm)

PSM Score: 45.06

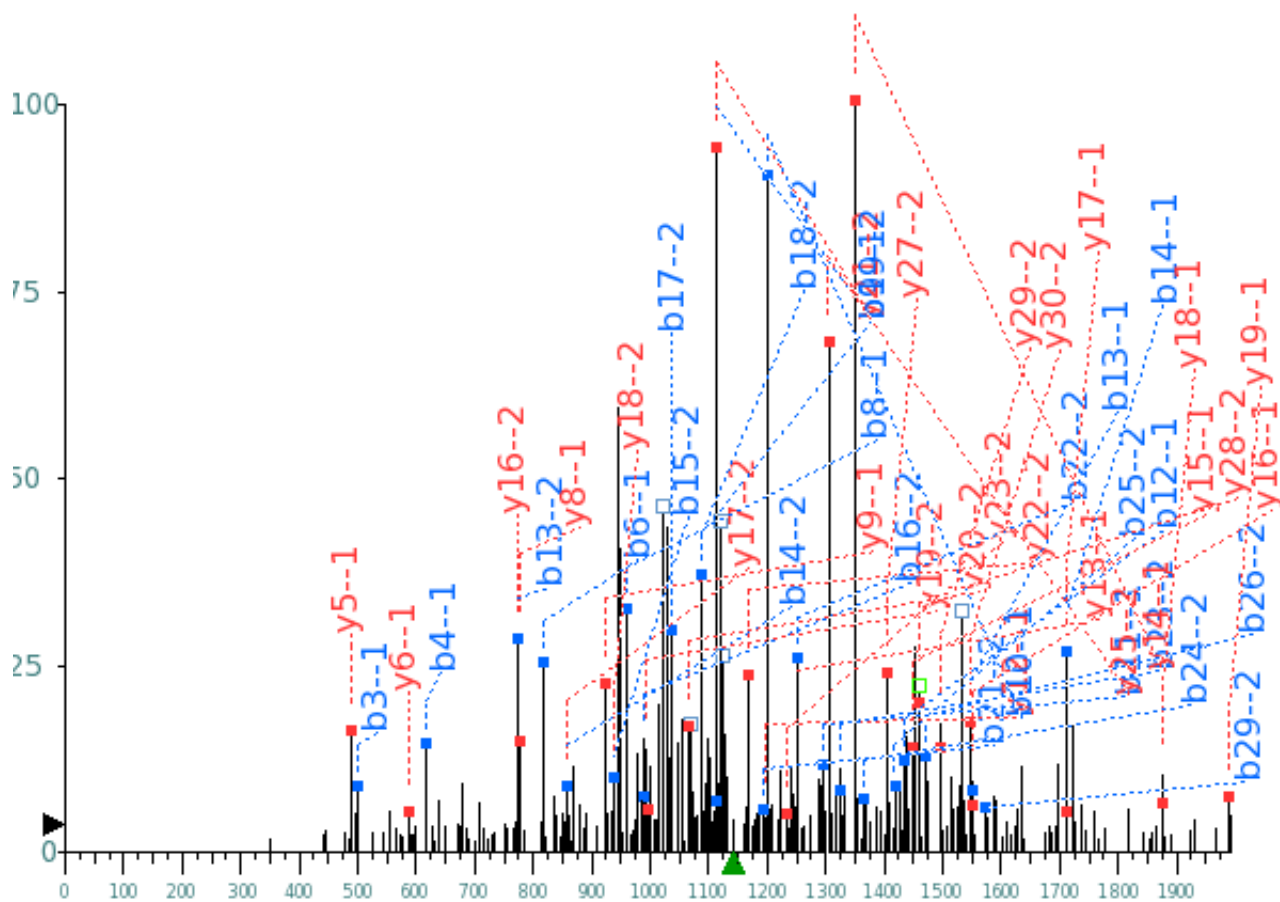

# TVAISDAAQLPHDYCTTPGGTLFSTTPGGTR (+3)

Primary Reference: 4EBP2\_HUMAN

Search ID: 73910

Search Name: 20141113\_QLhumanTMT6lowres\_Obj14178\_CETSA\_1103\_Set1\_Fraction\_02\_3pct

Scan#: 31087

Observed Mass: 1141.2304 (-3.8 ppm)

PSM Score: 51.15

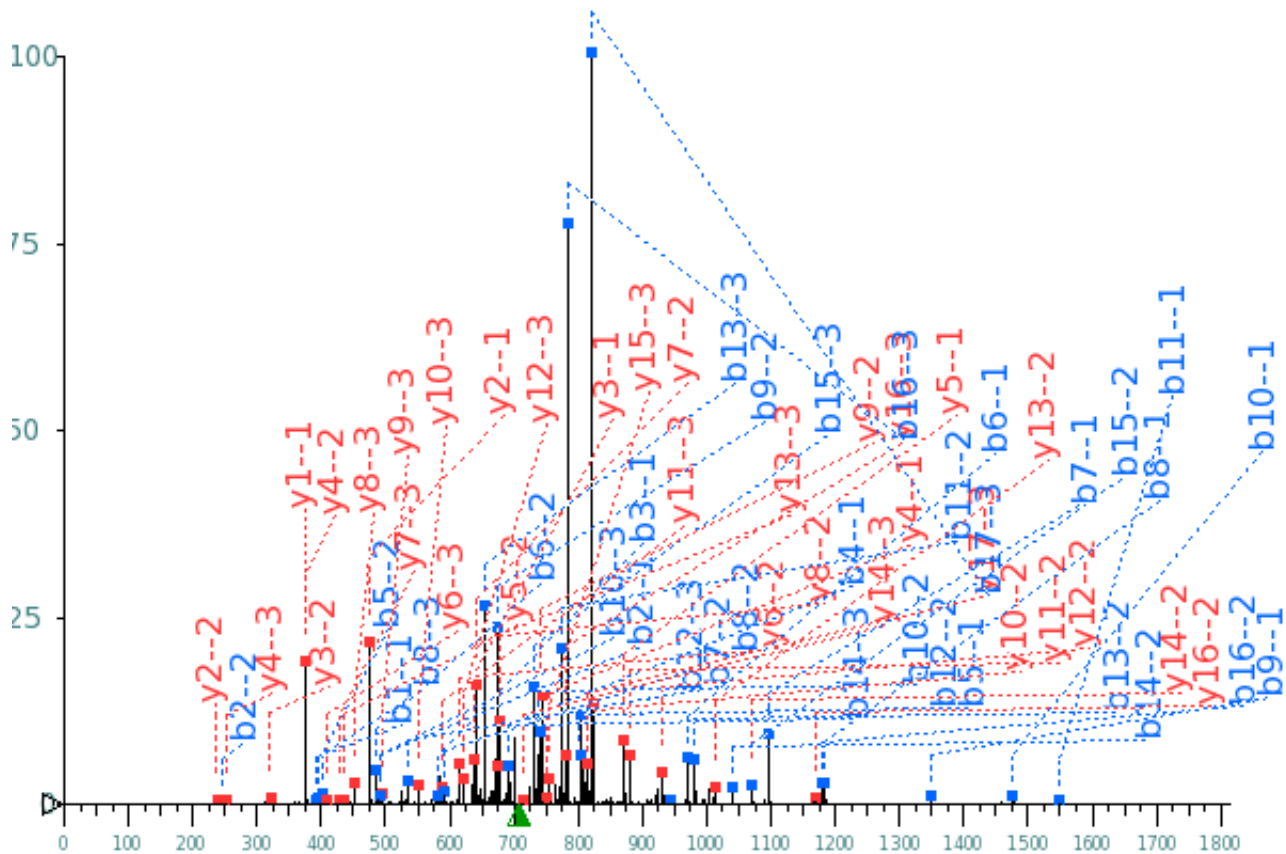

# YVSLIYTNYEAGKDDYVK (+4)

Primary Reference: C7DJS2\_HUMAN

Search ID: 73910

Search Name: 20141113\_QLhumanTMT6lowres\_Obj14178\_CETSA\_1103\_Set1\_Fraction\_02\_3pct

Scan#: 31286

Observed Mass: 707.8865 (-3 ppm)

PSM Score: 36.19



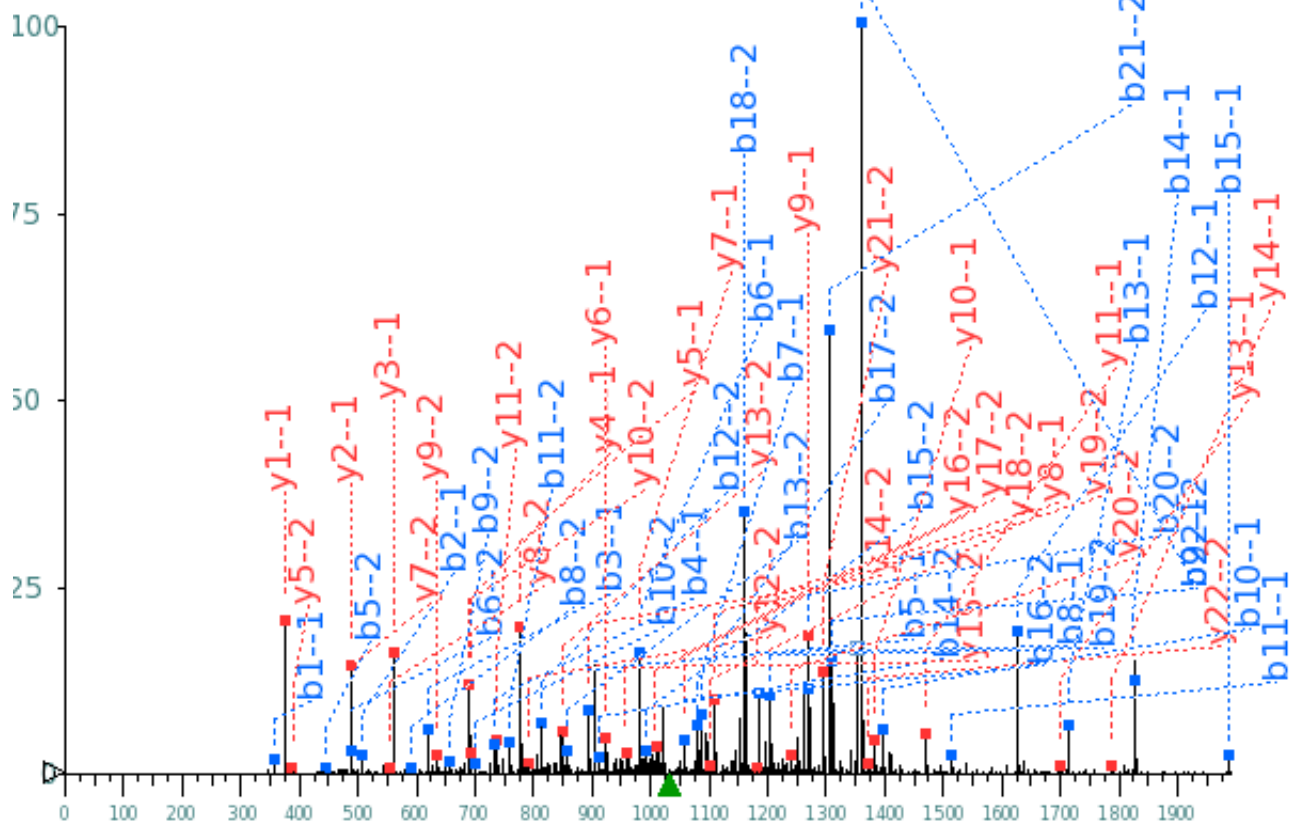

# QFLDCSTTQSDL<sup>SL</sup>CEGFSEALK (+3)

Primary Reference: CHC10\_HUMAN

Search ID: 73910

Search Name: 20141113\_QLhumanTMT6lowres\_Obj14178\_CETSA\_1103\_Set1\_Fraction\_02\_3pct

Scan#: 38266

Observed Mass: 1032.174 (-1.3 ppm)

PSM Score: 81.04

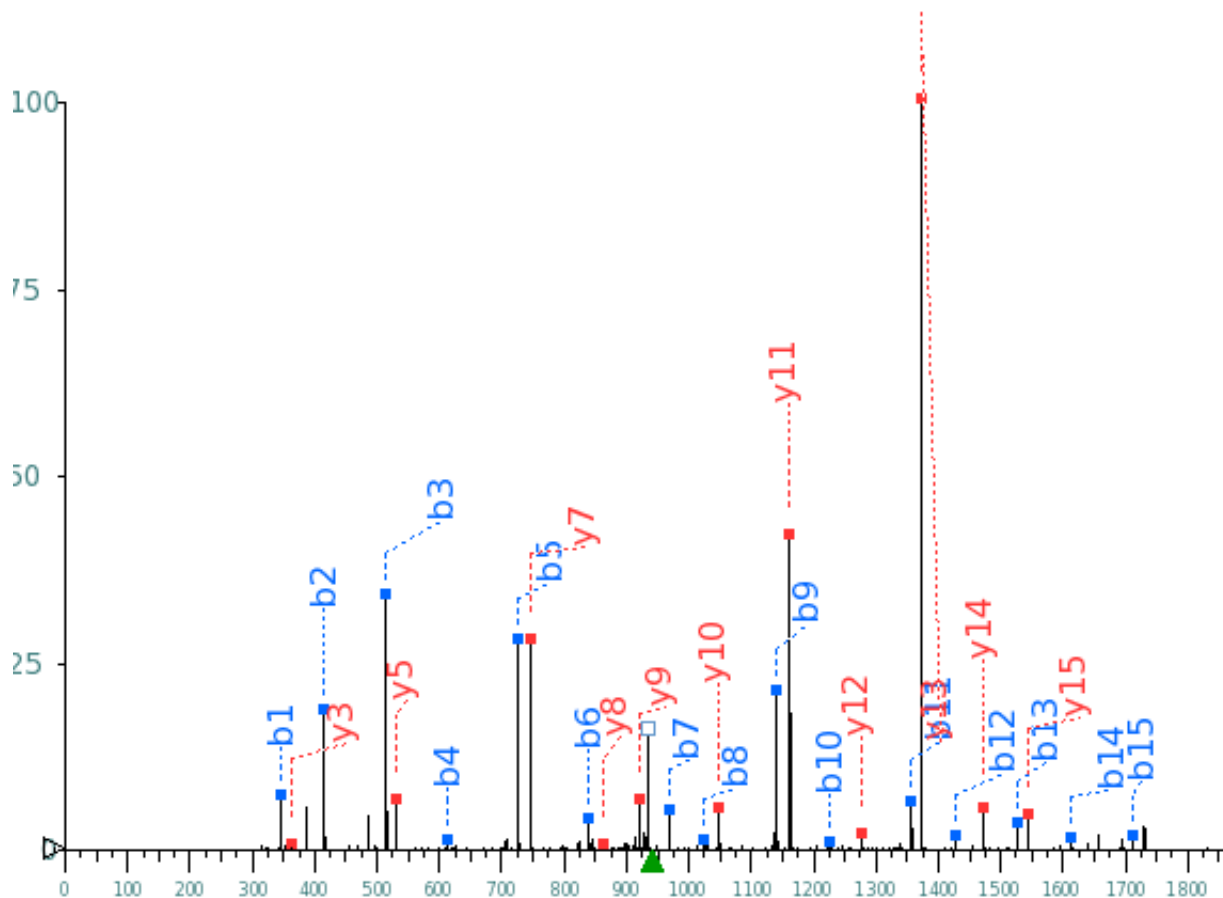

# NAVPDIQGDSEAVSVR (+2)

Primary Reference: IPKG\_HUMAN

Search ID: 73911

Search Name: 20141113\_QLhumanTMT6lowres\_Obj14178\_CETSA\_1103\_Set1\_Fraction\_03

Scan#: 21458

Observed Mass: 943.4916 (-3.1 ppm)

PSM Score: 86.73

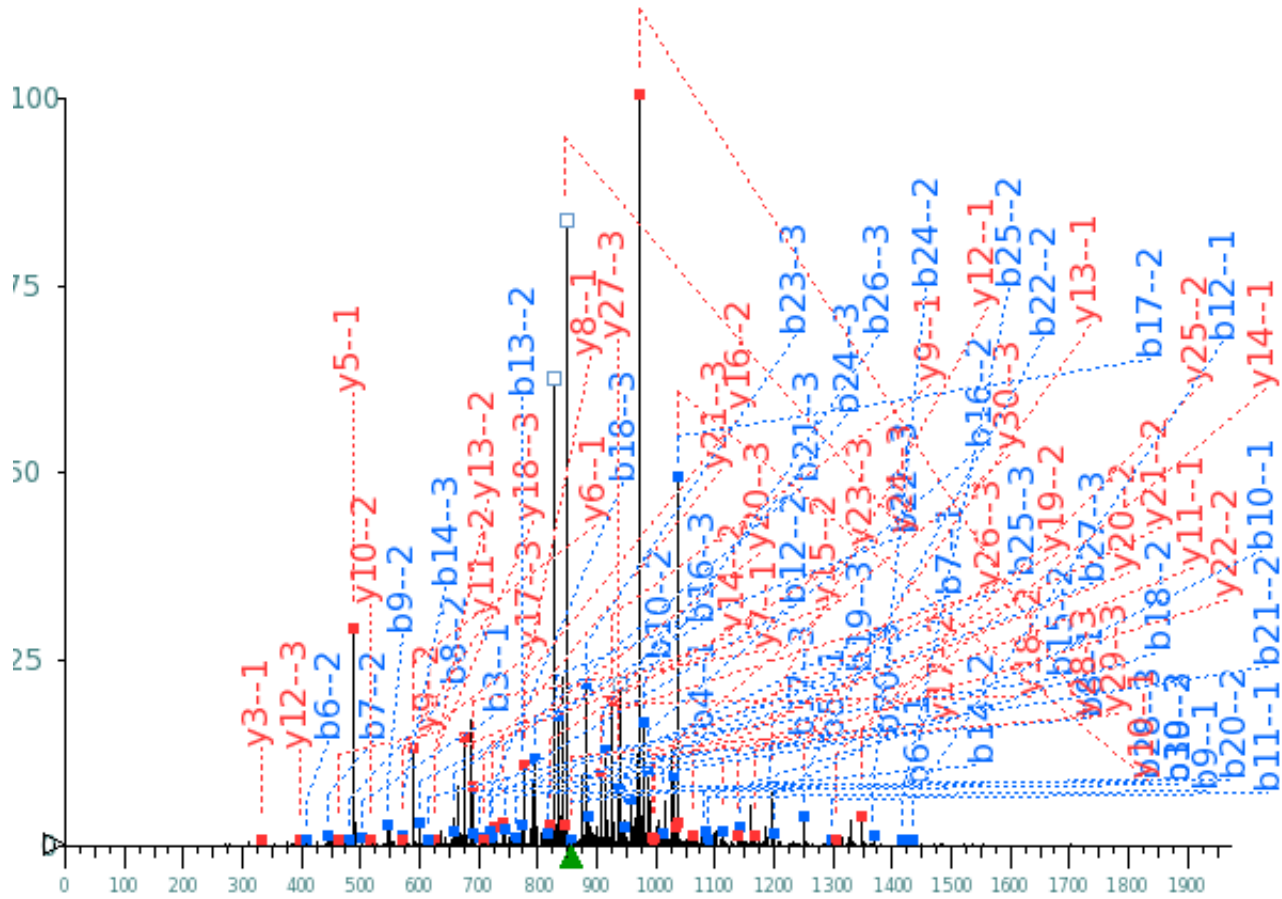

# TVAISDAAQLPHDYCTTPGGTLFSTTPGGTR (+4)

Primary Reference: 4EBP2\_HUMAN

Search ID: 73911

Search Name: 20141113\_QLhumanTMT6lowres\_Obj14178\_CETSA\_1103\_Set1\_Fraction\_03

Scan#: 30872

Observed Mass: 856.1761 (-2.1 ppm)

PSM Score: 33.41

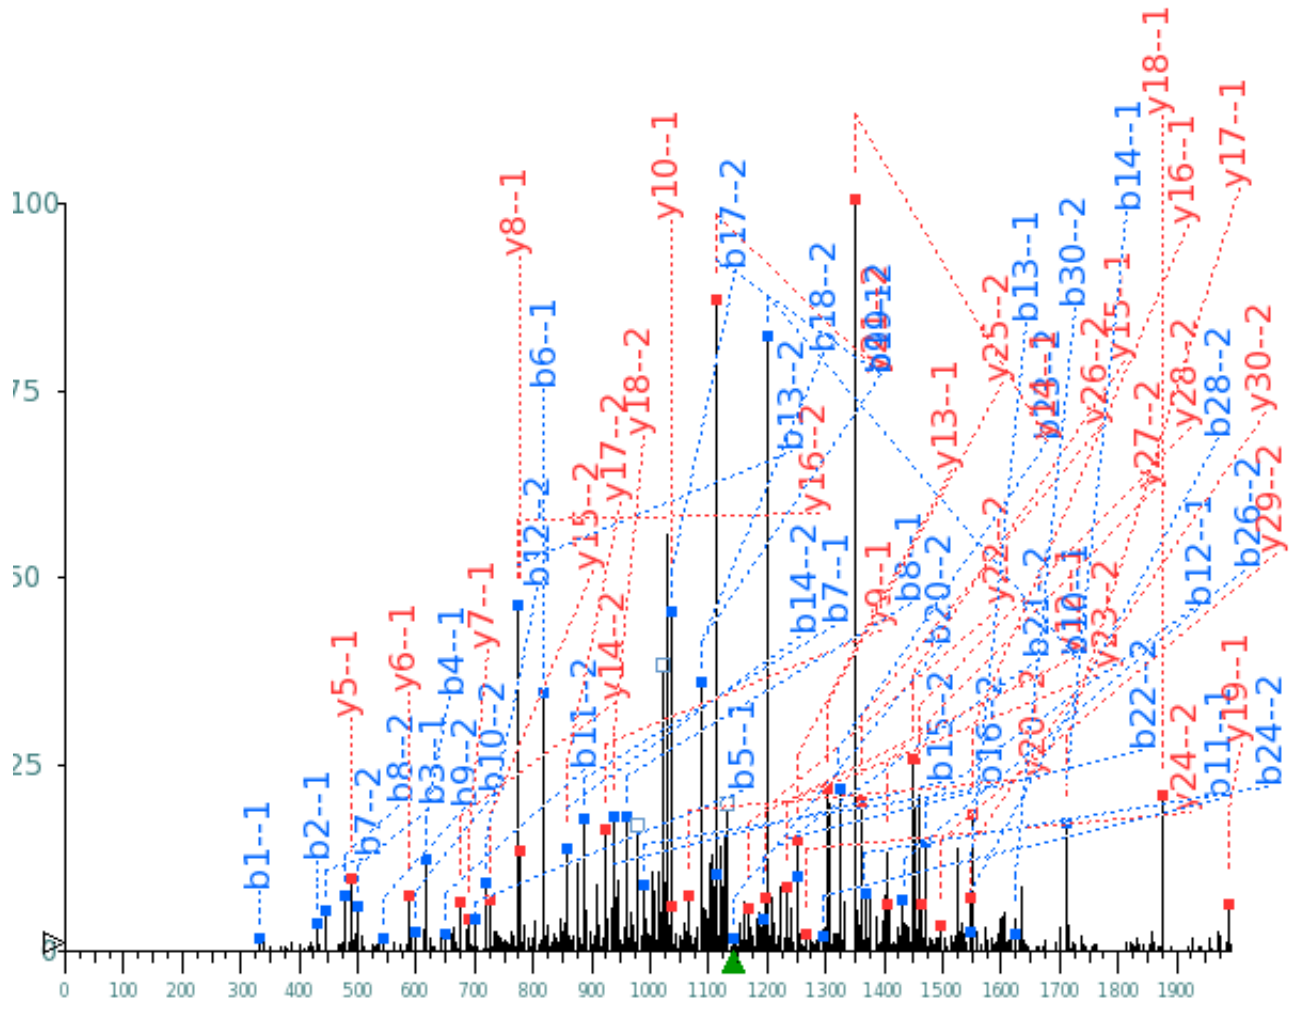

# TVAISDAAQLPHDYCTTPGGTLFSTTPGGTR (+3)

Primary Reference: 4EBP2\_HUMAN

Search ID: 73911

Search Name: 20141113\_QLhumanTMT6lowres\_Obj14178\_CETSA\_1103\_Set1\_Fraction\_03

Scan#: 30891

Observed Mass: 1141.2313 (-3 ppm)

PSM Score: 73.07

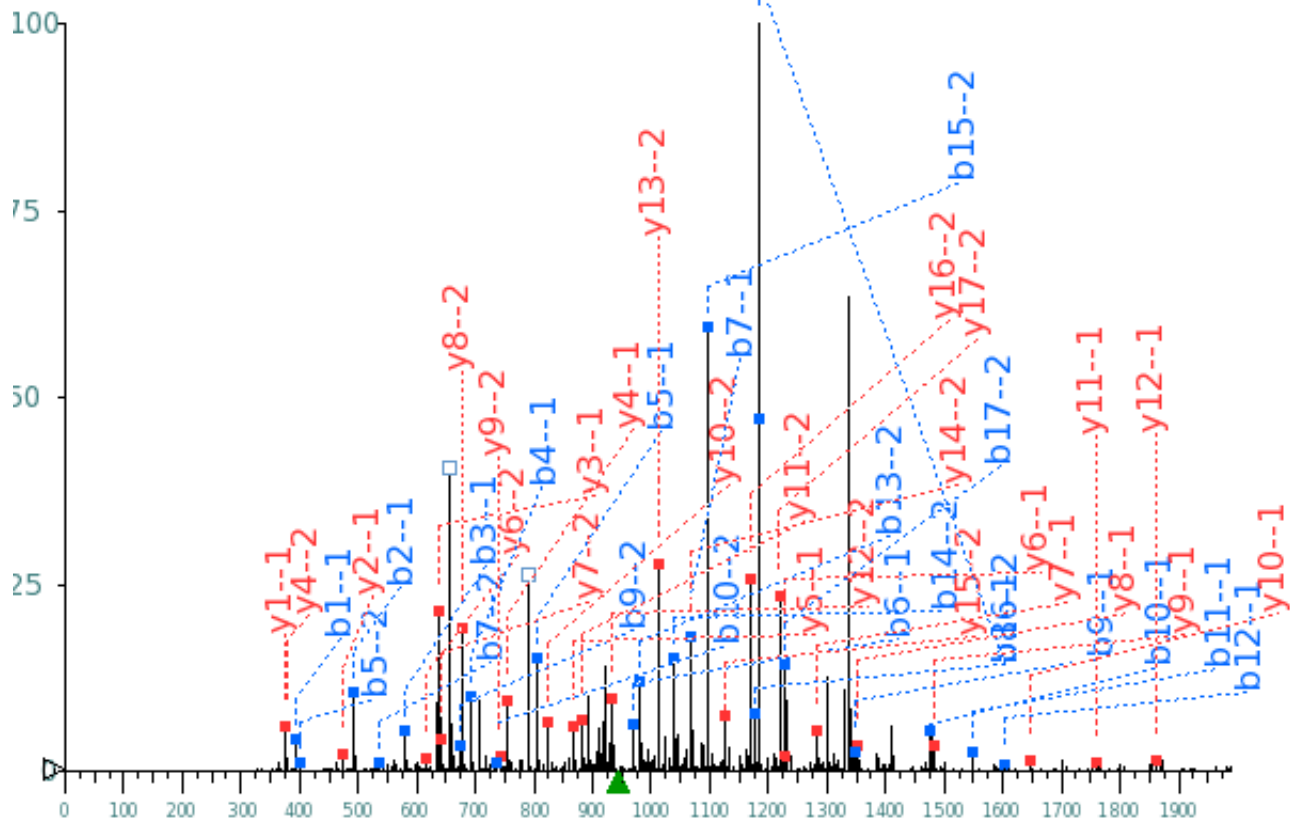

# YVSLIYTNYEAGKDDYVK (+3)

Primary Reference: C7DJS2\_HUMAN

Search ID: 73911

Search Name: 20141113\_QLhumanTMT6lowres\_Obj14178\_CETSA\_1103\_Set1\_Fraction\_03

Scan#: 31076

Observed Mass: 943.5125 (-3.4 ppm)

PSM Score: 37.34

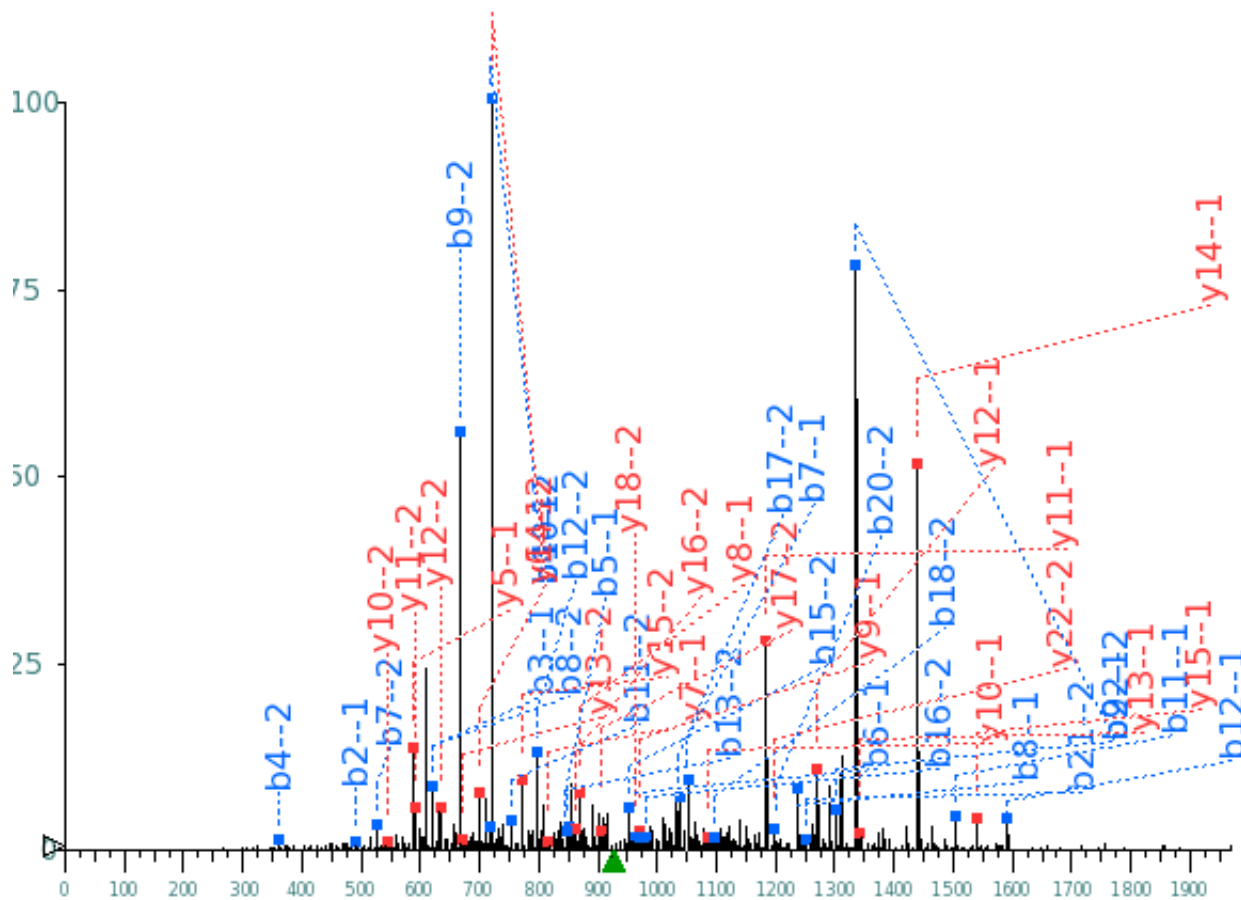

# FLQTEDSWVPASPDTGLDPLTVR (+3)

Primary Reference: C1023\_HUMAN

Search ID: 73911

Search Name: 20141113\_QLhumanTMT6lowres\_Obj14178\_CETSA\_1103\_Set1\_Fraction\_03

Scan#: 41169

Observed Mass: 925.147 (0.7 ppm)

PSM Score: 24.3

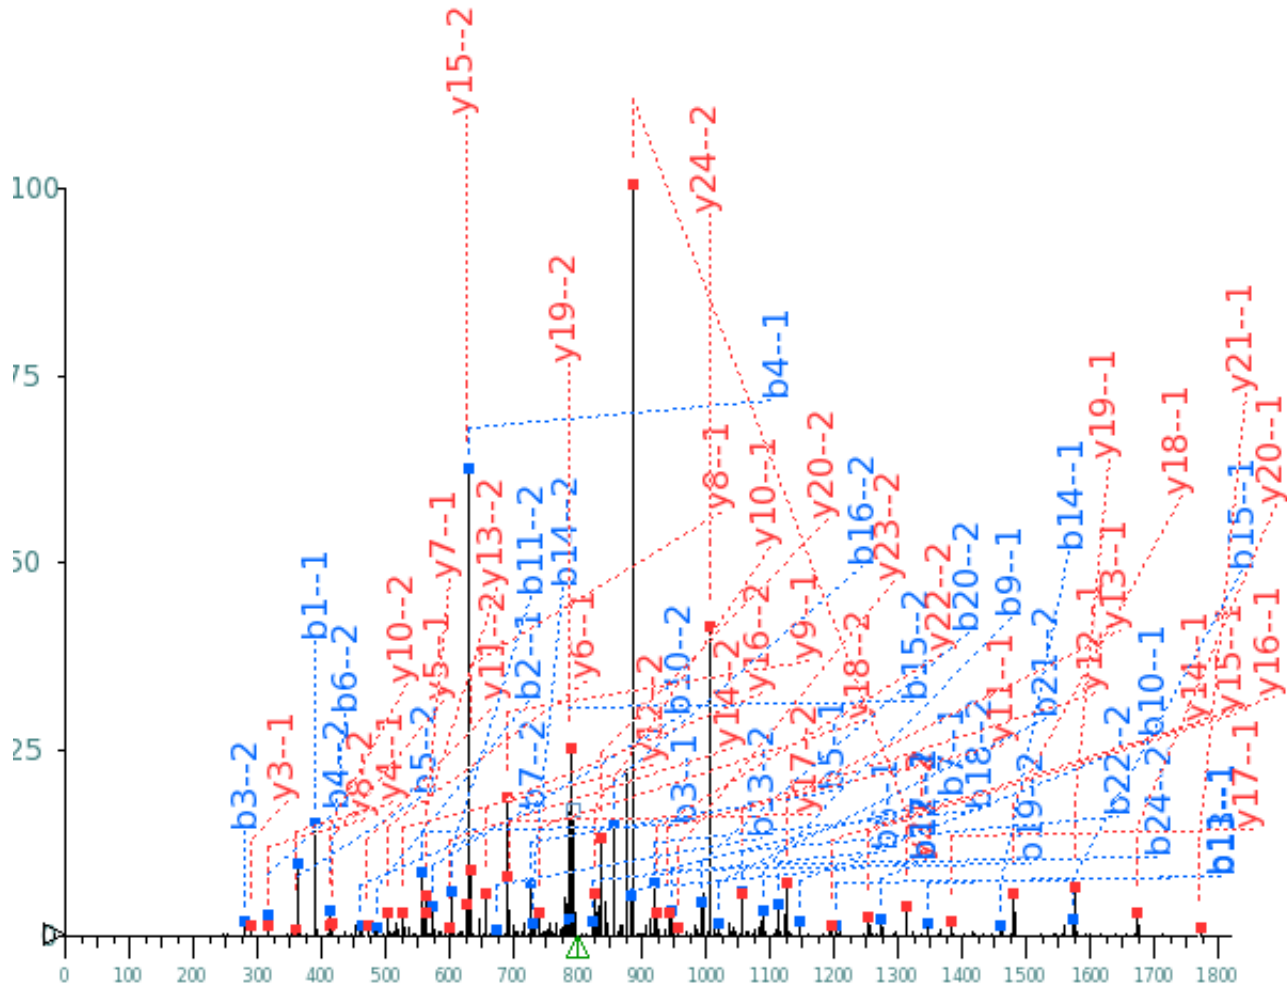

# CPAAPPPPAGGAANNHGAGSGAGGR (+3)

Primary Reference: Q96GF2\_HUMAN

Search ID: 73912

Search Name: 20141113\_QLhumanTMT6lowres\_Obj14178\_CETSA\_1103\_Set1\_Fraction\_04

Scan#: 9666

Observed Mass: 800.0592 (-0 ppm)

PSM Score: 105.8

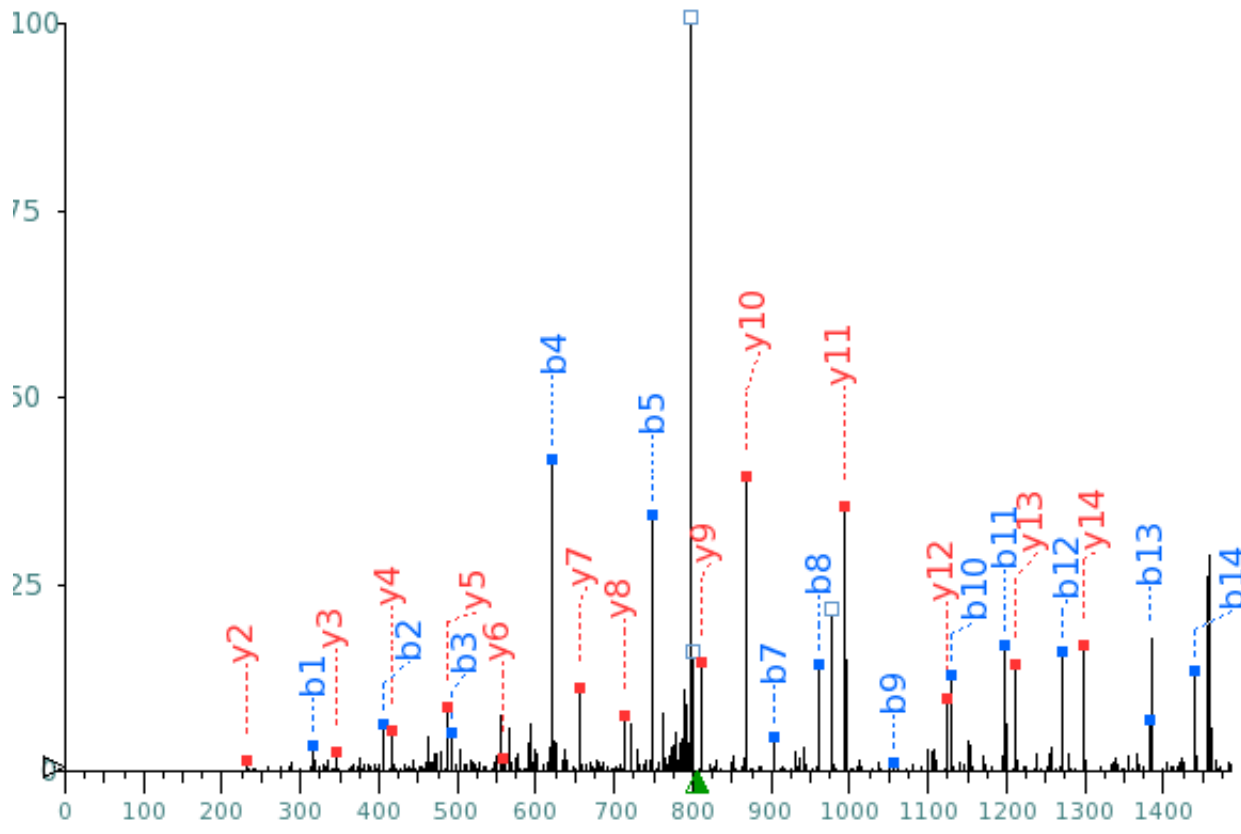

# SSSEQGPGPAAALGR (+2)

Primary Reference: DNLZ\_HUMAN

Search ID: 73912

Search Name: 20141113\_QLhumanTMT6lowres\_Obj14178\_CETSA\_1103\_Set1\_Fraction\_04

Scan#: 13775

Observed Mass: 807.424 (-2.3 ppm)

PSM Score: 79.16



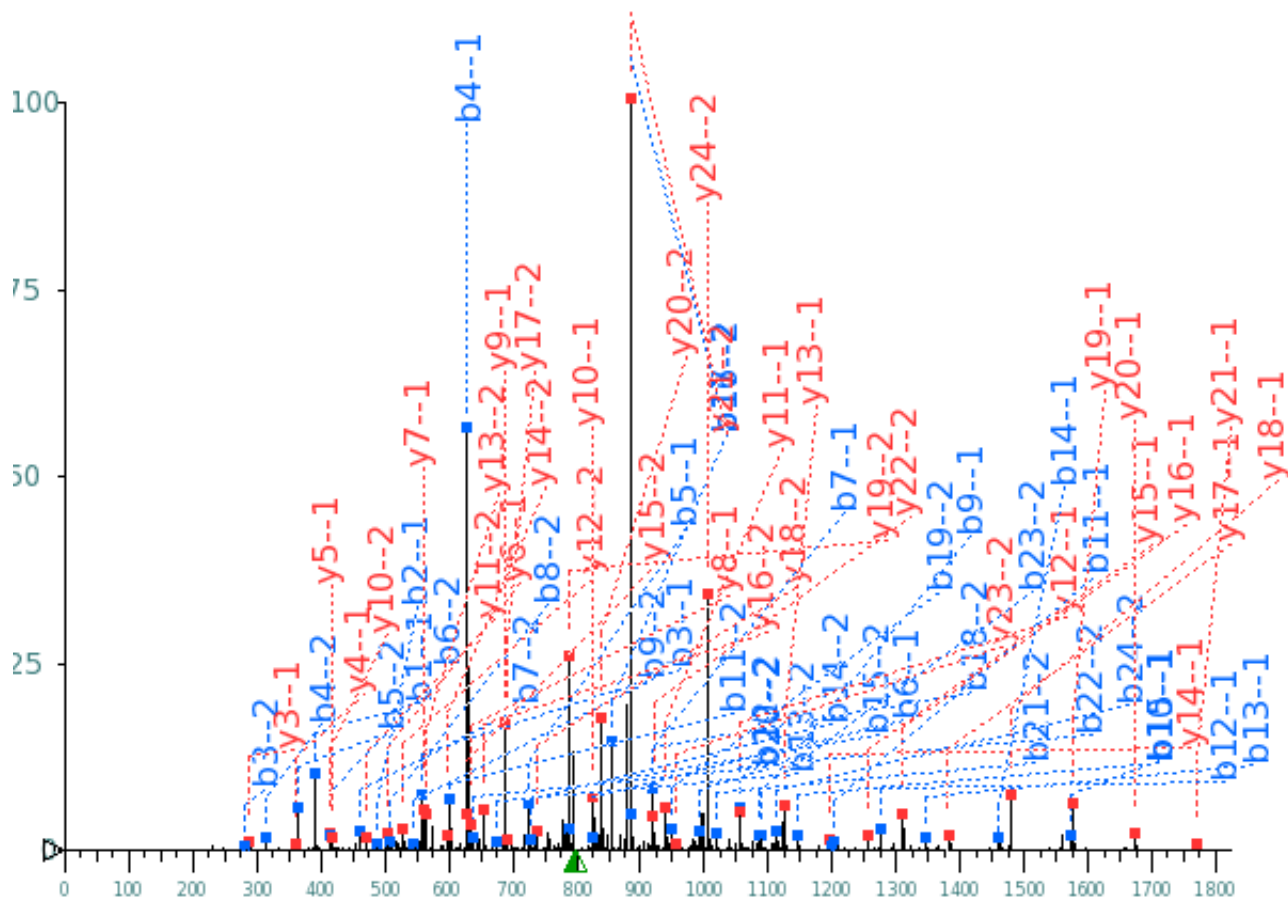

# CPAAPPPPAGGAANNHGAGSGAGGR (+3)

Primary Reference: Q96GF2\_HUMAN

Search ID: 73913

Search Name: 20141113\_QLhumanTMT6lowres\_Obj14178\_CETSA\_1103\_Set1\_Fraction\_05

Scan#: 9351

Observed Mass: 800.0567 (-3.2 ppm)

PSM Score: 102.19

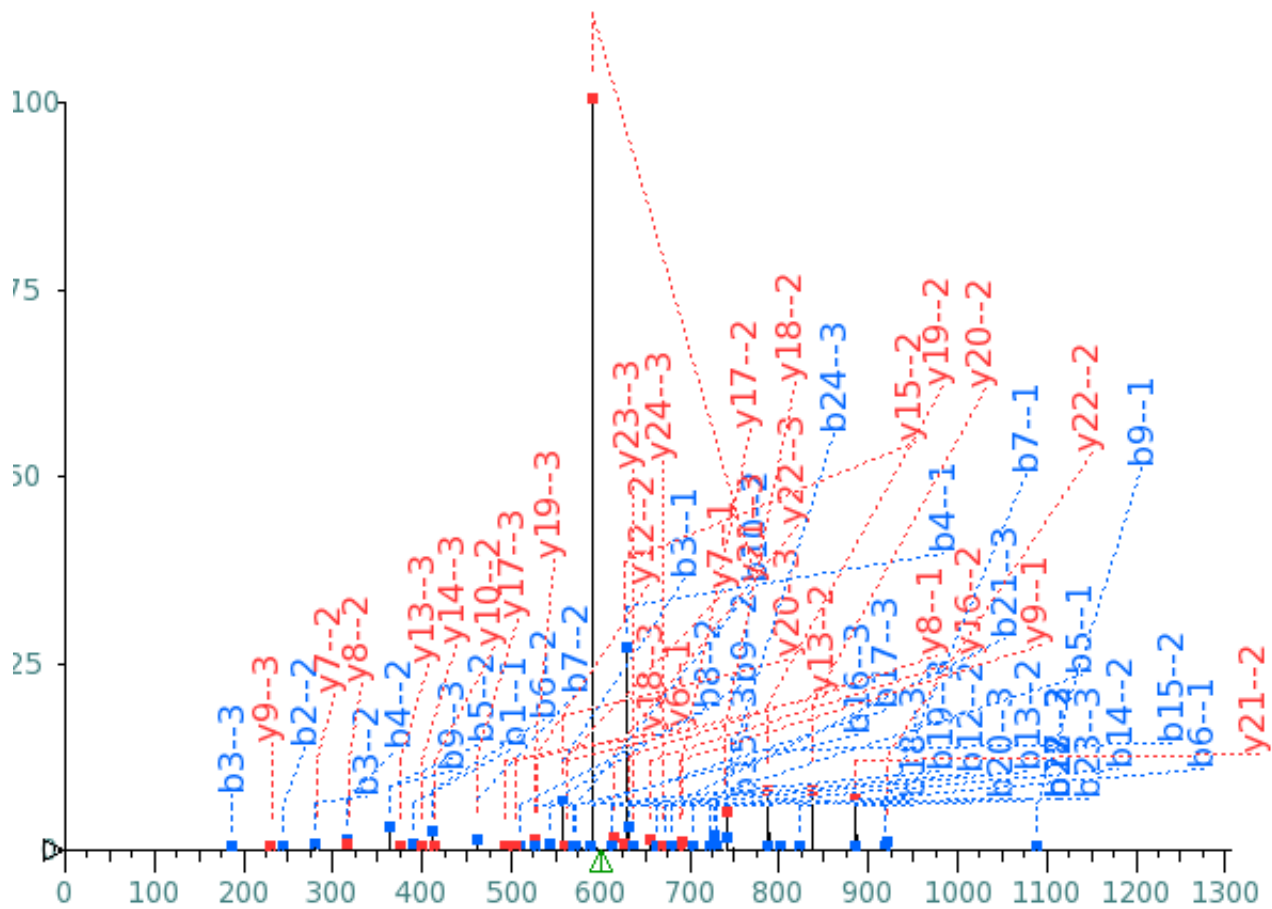

# CPAAPPPPAGGAANNHGAGSGAGGR (+4)

Primary Reference: Q96GF2\_HUMAN

Search ID: 73913

Search Name: 20141113\_QLhumanTMT6lowres\_Obj14178\_CETSA\_1103\_Set1\_Fraction\_05

Scan#: 9399

Observed Mass: 600.2941 (-3.5 ppm)

PSM Score: 27.86

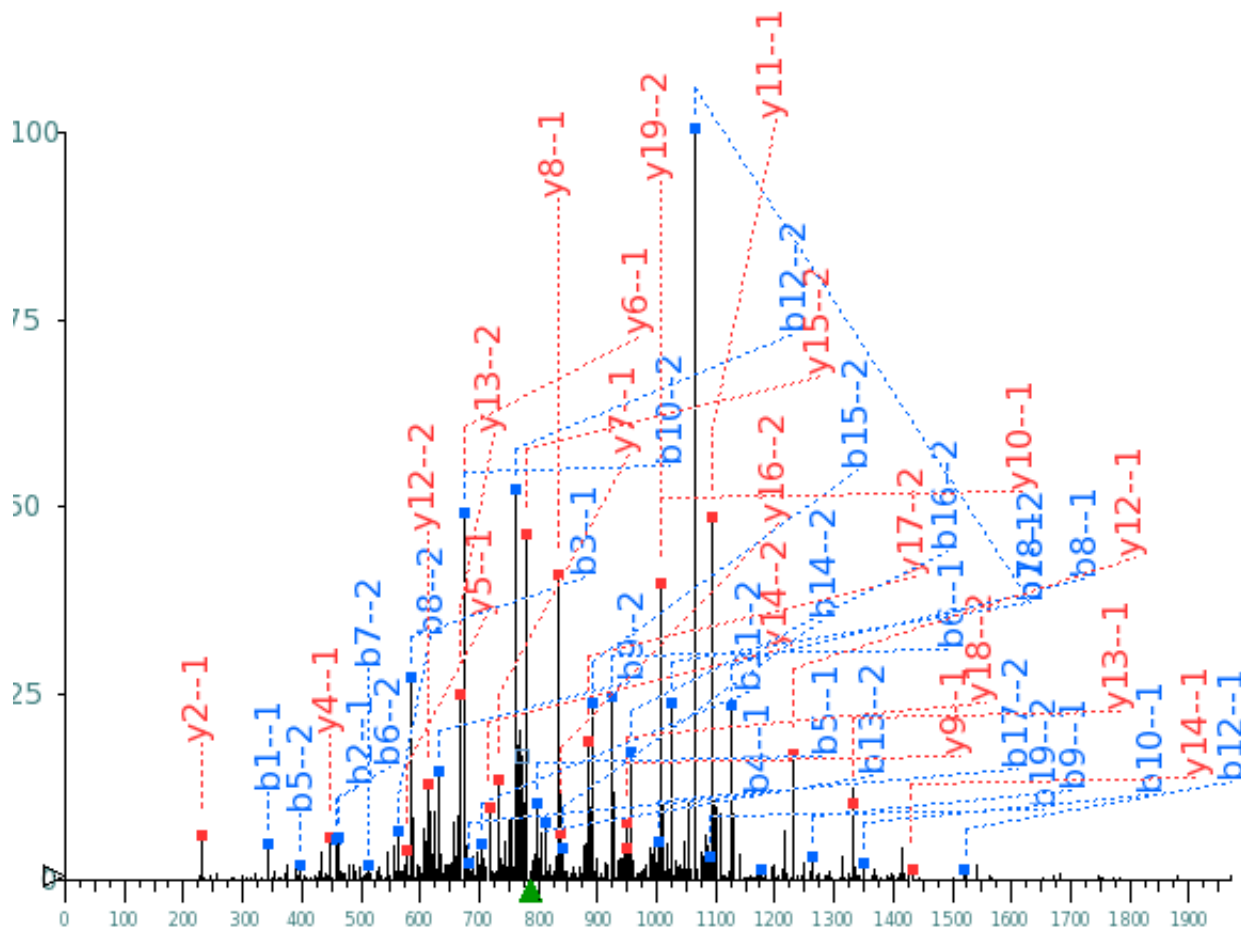

# IIEPNEVTHSGDTGVETDGR (+3)

Primary Reference: B4E2P4\_HUMAN

Search ID: 73913

Search Name: 20141113\_QLhumanTMT6lowres\_Obj14178\_CETSA\_1103\_Set1\_Fraction\_05

Scan#: 18531

Observed Mass: 785.7238 (-2.5 ppm)

PSM Score: 44.78

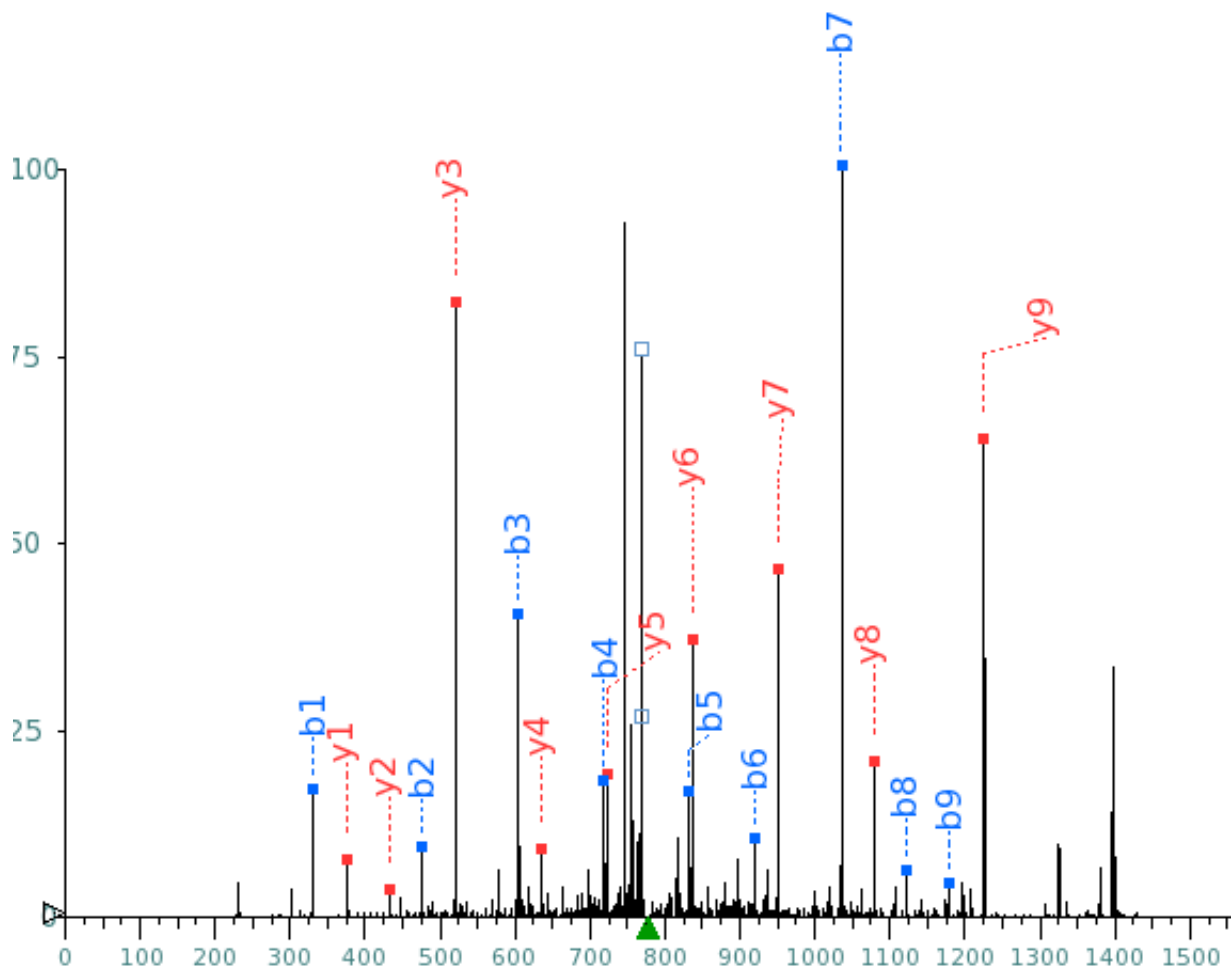

# VFELNSDSGK (+2)

Primary Reference: BSDC1\_HUMAN

Search ID: 73913

Search Name: 20141113\_QLhumanTMT6lowres\_Obj14178\_CETSA\_1103\_Set1\_Fraction\_05

Scan#: 22990

Observed Mass: 777.43 (-3 ppm)

PSM Score: 43.1

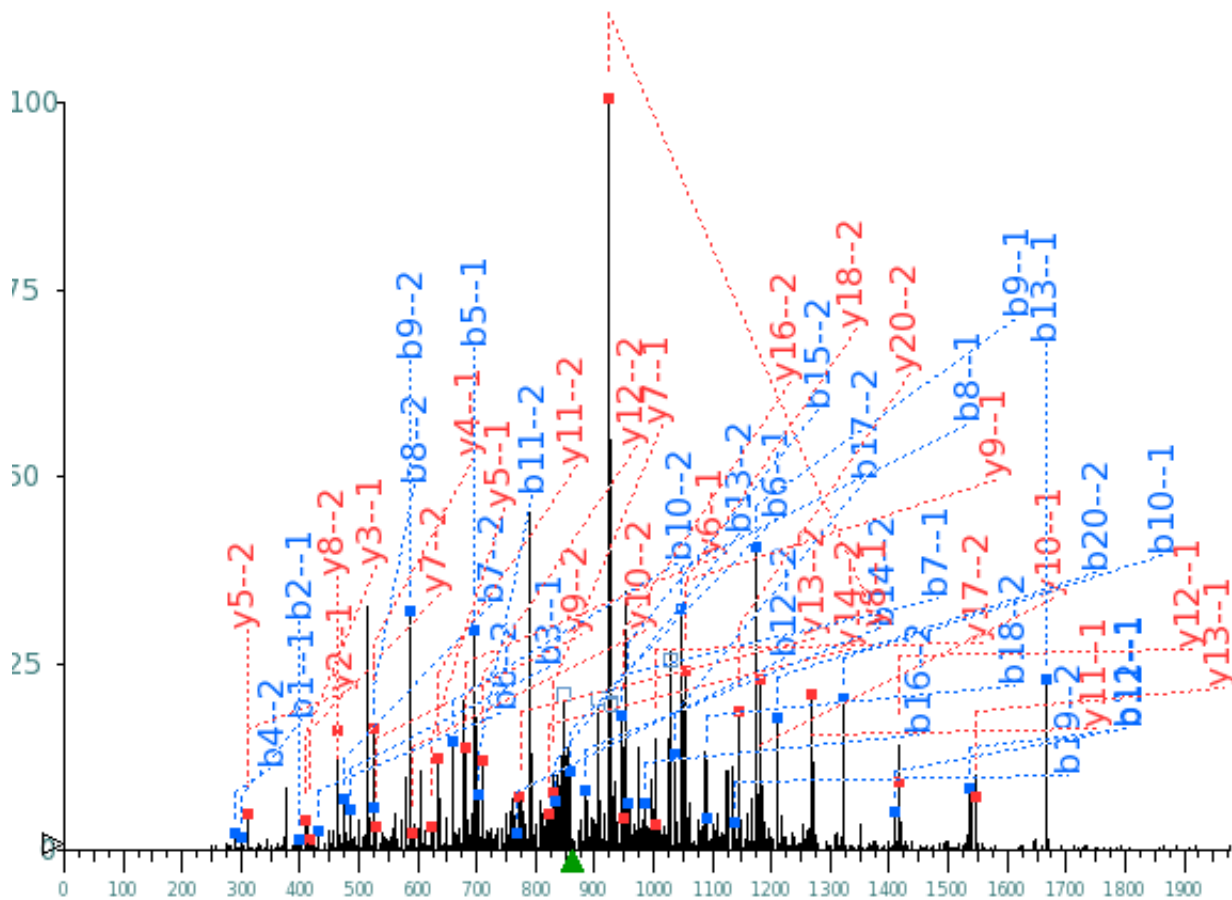

# APSPLYSVEFSEEPFGVIVHR (+3)

Primary Reference: B7Z5V6\_HUMAN

Search ID: 73913

Search Name: 20141113\_QLhumanTMT6lowres\_Obj14178\_CETSA\_1103\_Set1\_Fraction\_05

Scan#: 35655

Observed Mass: 863.7864 (-4.1 ppm)

PSM Score: 32.21

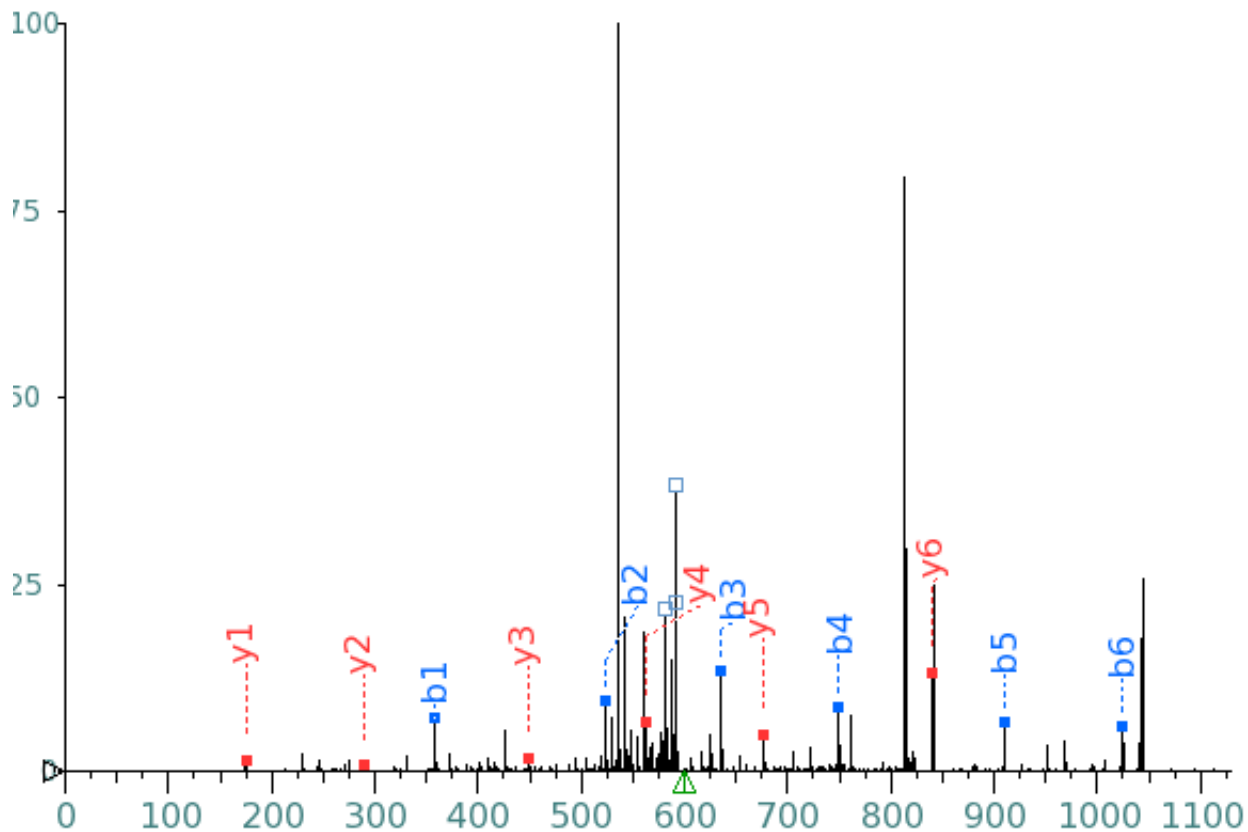

# EYINCNR (+2)

Primary Reference: SMRD2\_HUMAN

Search ID: 73917

Search Name: 20141113\_QLhumanTMT6lowres\_Obj14178\_CETSA\_1103\_Set1\_Fraction\_07

Scan#: 11085

Observed Mass: 599.295 (-4.7 ppm)

PSM Score: 14.08

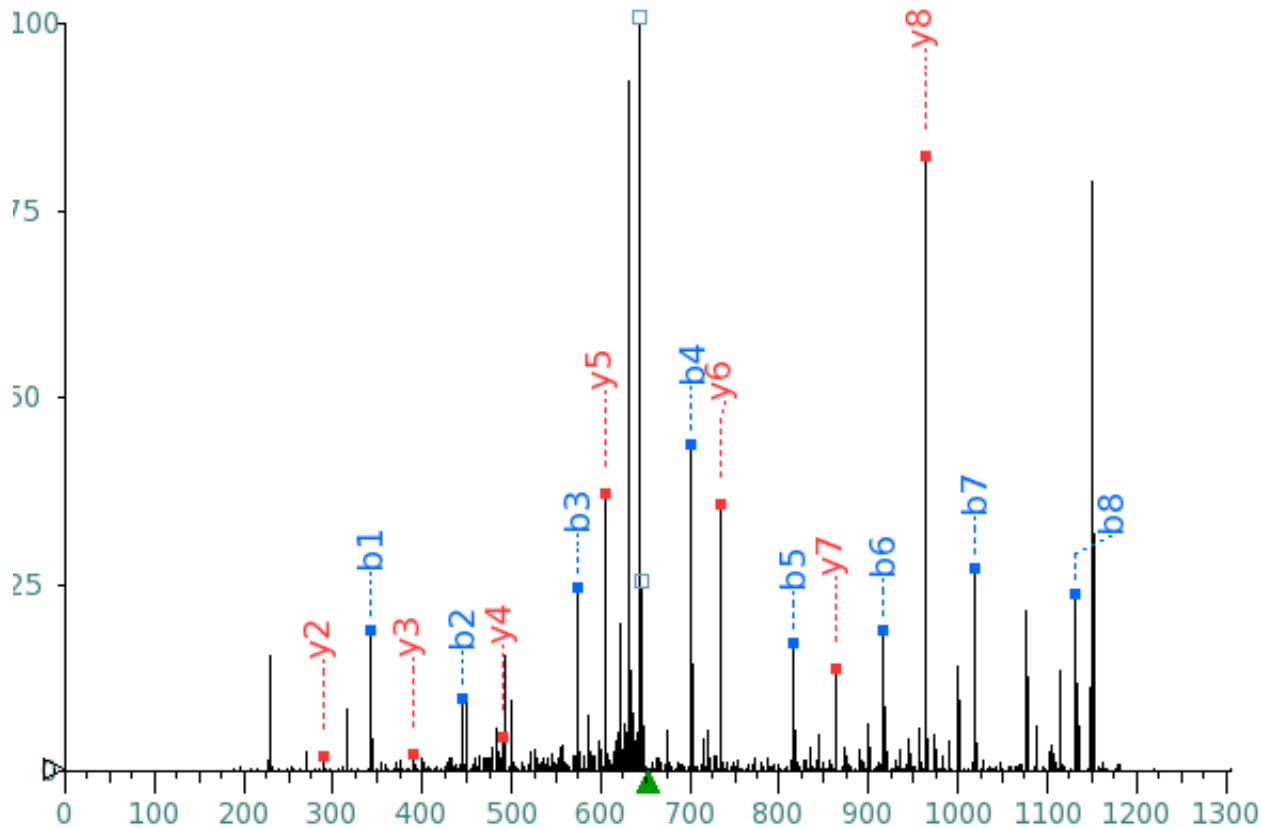

# LTEENTTLR (+2)

Primary Reference: PEG10\_HUMAN

Search ID: 73917

Search Name: 20141113\_QLhumanTMT6lowres\_Obj14178\_CETSA\_1103\_Set1\_Fraction\_07

Scan#: 15562

Observed Mass: 653.3611 (-4.8 ppm)

PSM Score: 39.94

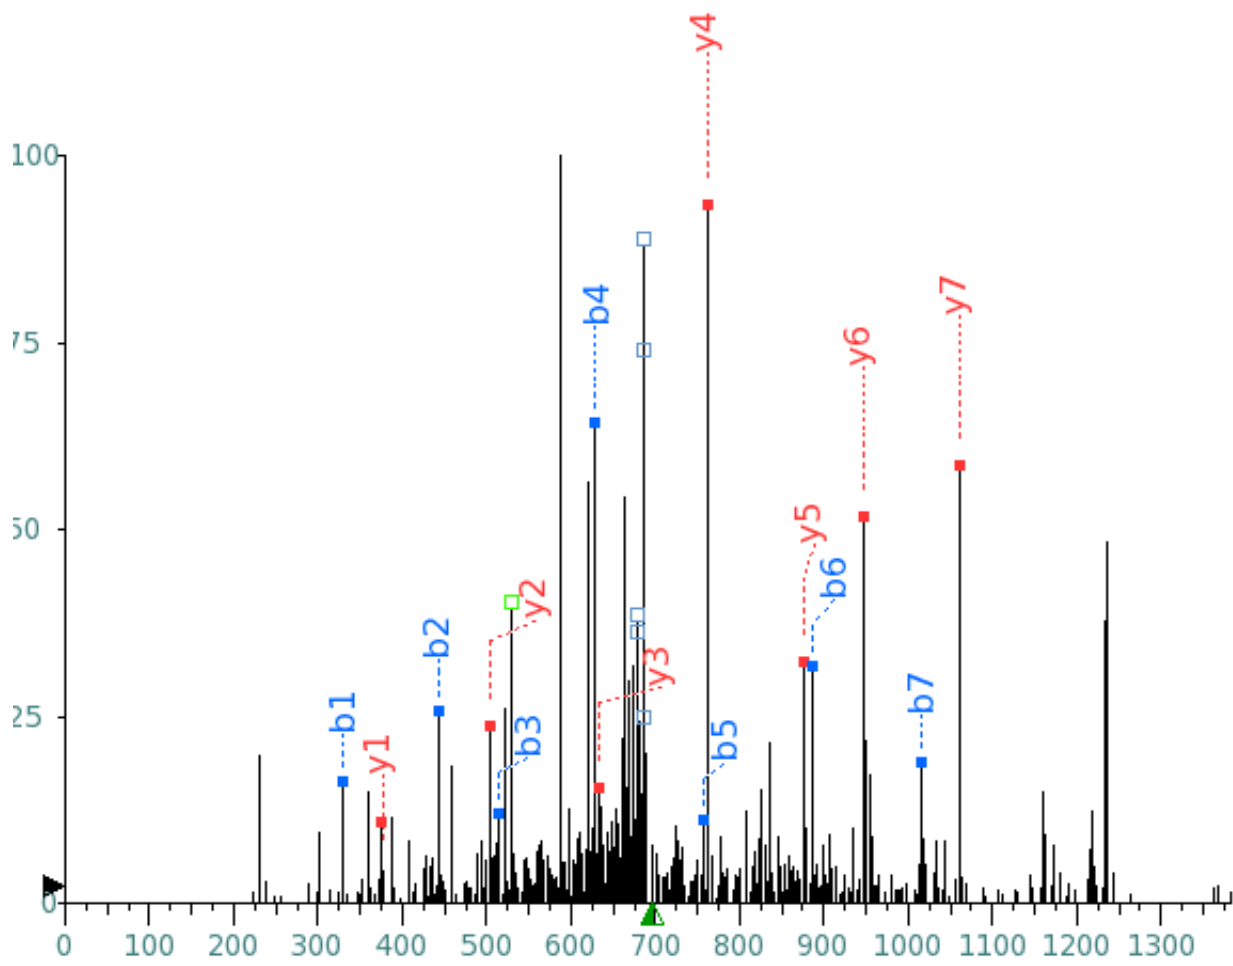

# VIADEEQK (+2)

Primary Reference: TRI44\_HUMAN

Search ID: 73917

Search Name: 20141113\_QLhumanTMT6lowres\_Obj14178\_CETSA\_1103\_Set1\_Fraction\_07

Scan#: 16133

Observed Mass: 695.3997 (-4.8 ppm)

PSM Score: 24.09



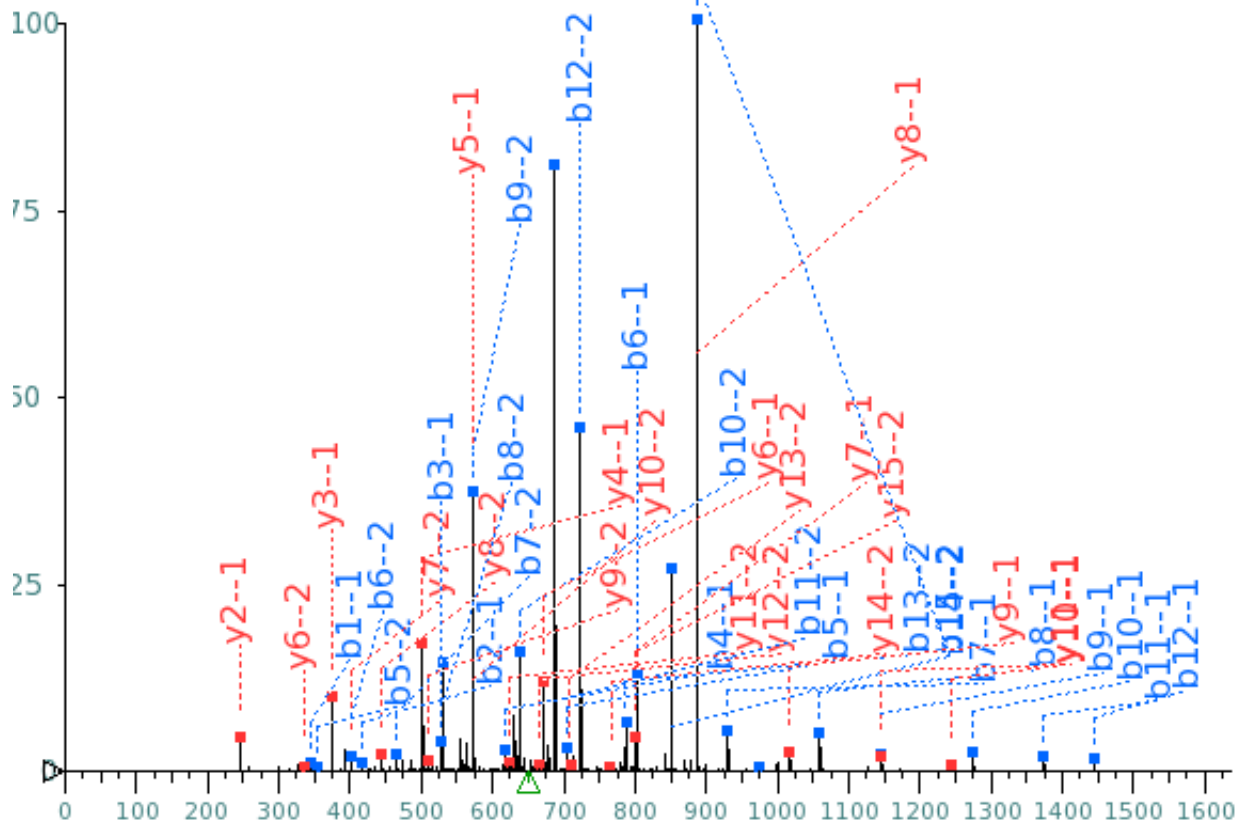

# DALSSVQESQVAQQAR (+3)

Primary Reference: APOC3\_HUMAN

Search ID: 73917

Search Name: 20141113\_QLhumanTMT6lowres\_Obj14178\_CETSA\_1103\_Set1\_Fraction\_07

Scan#: 19259

Observed Mass: 649.3392 (-5.7 ppm)

PSM Score: 59.96

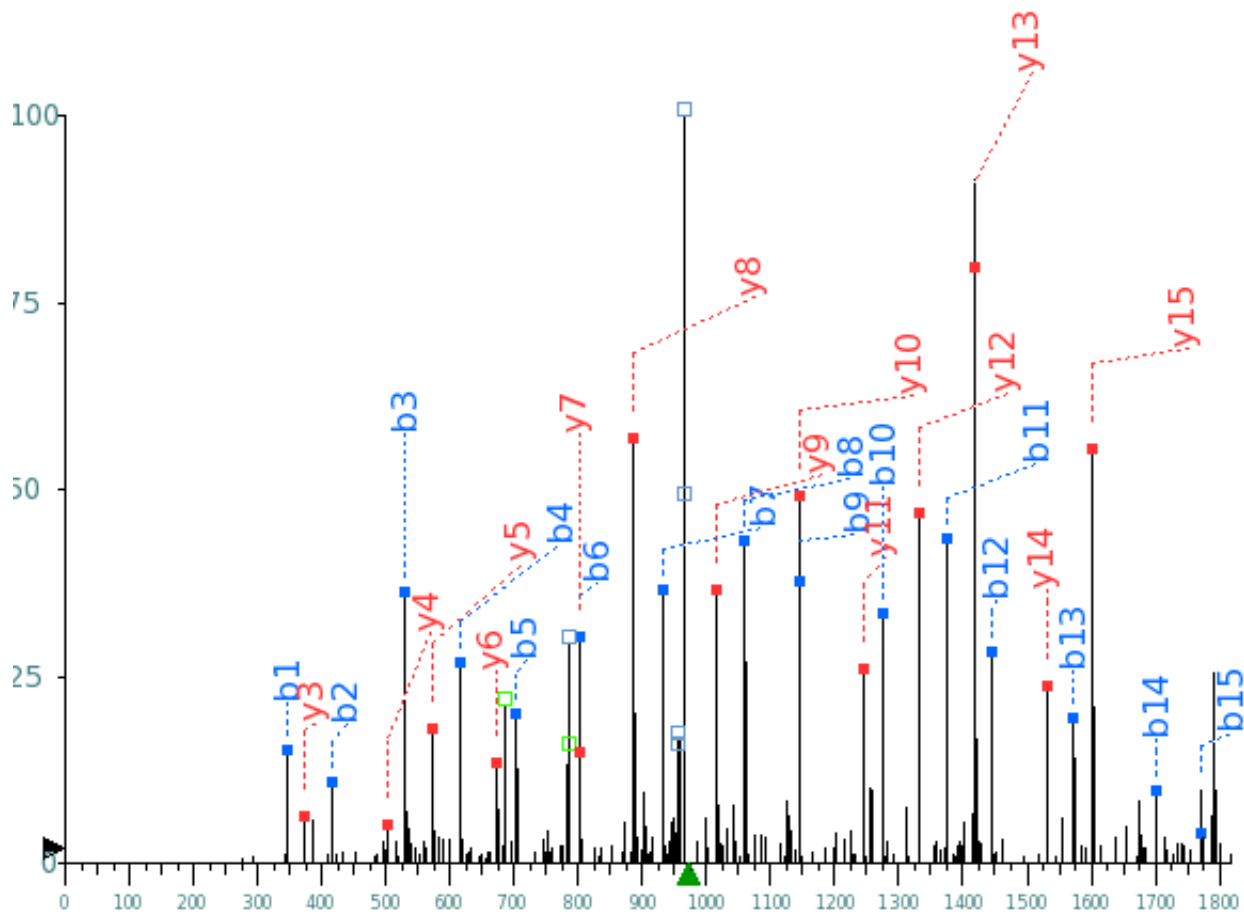

# DALSSVQESQVAQQAR (+2)

Primary Reference: APOC3\_HUMAN

Search ID: 73917

Search Name: 20141113\_QLhumanTMT6lowres\_Obj14178\_CETSA\_1103\_Set1\_Fraction\_07

Scan#: 19270

Observed Mass: 973.5047 (-6.2 ppm)

PSM Score: 86.08

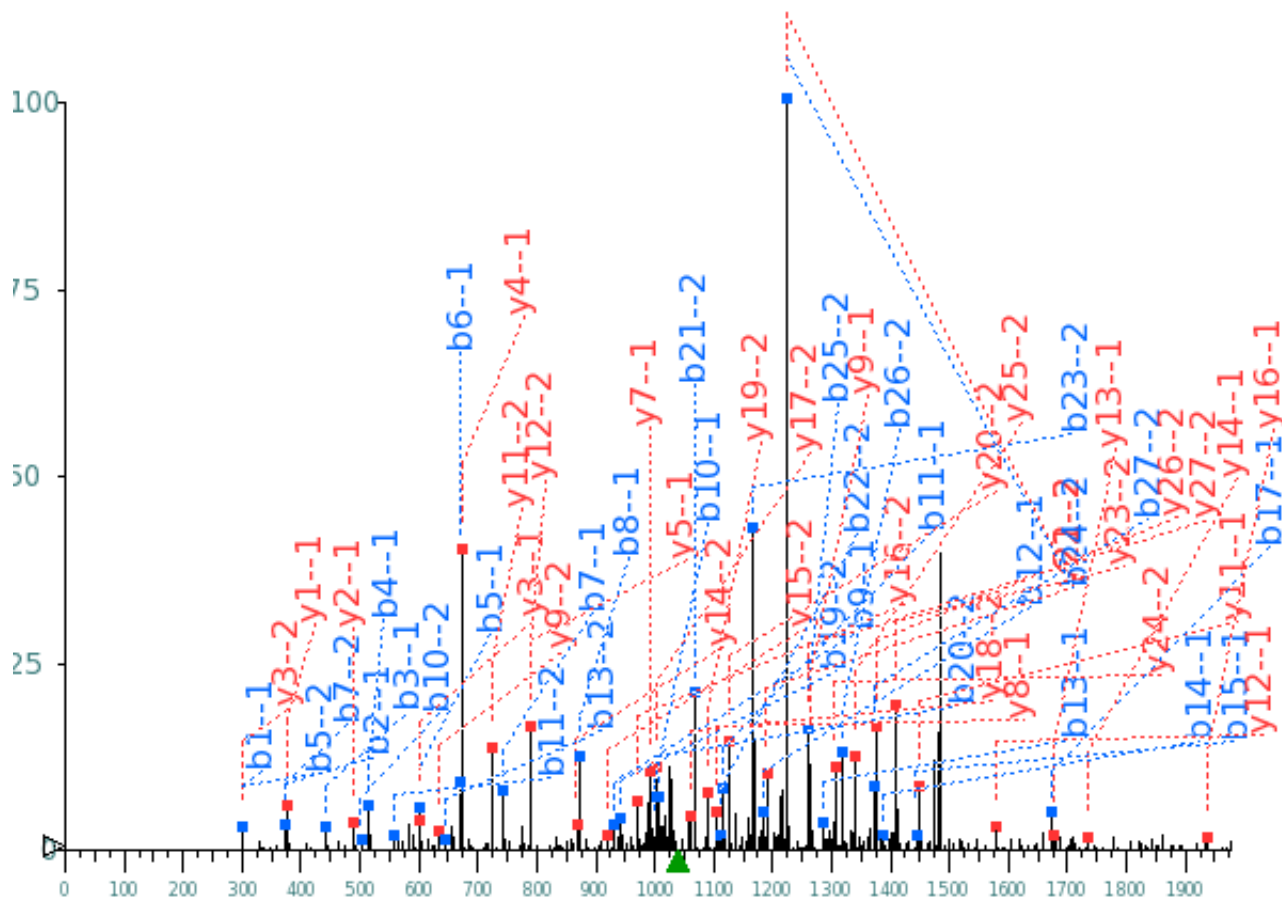

# AAAASAAEAGIATTGTEGERDSDDALK (+3)

Primary Reference: Q5VWC4\_HUMAN

Search ID: 73917

Search Name: 20141113\_QLhumanTMT6lowres\_Obj14178\_CETSA\_1103\_Set1\_Fraction\_07

Scan#: 26143

Observed Mass: 1040.8671 (-6.2 ppm)

PSM Score: 83.32

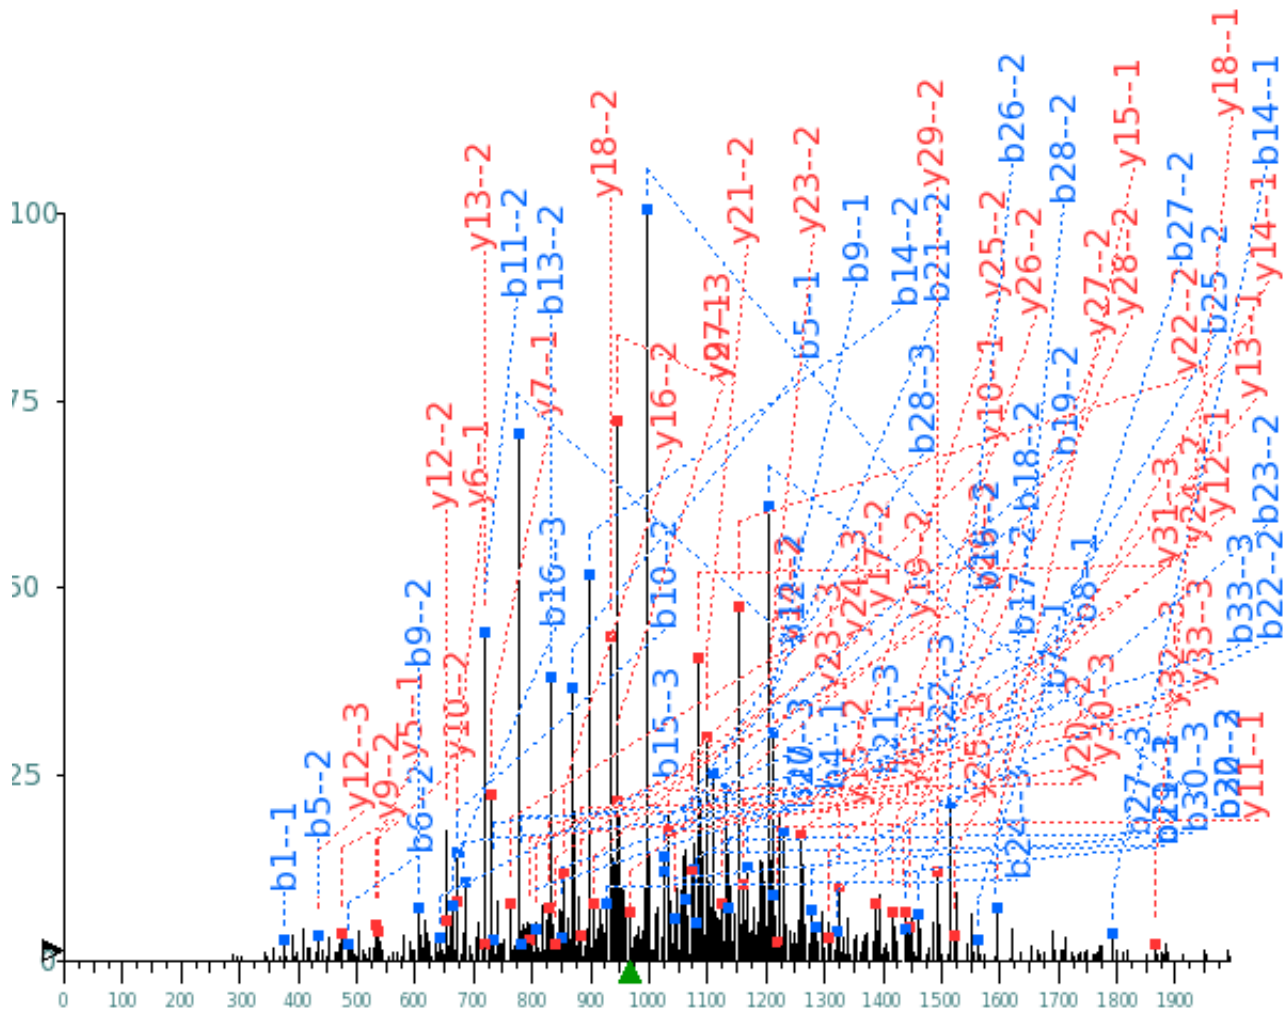

# FLNEHPGGEEVLLEQAGVDASESFEDVGHSSDAR (+4)

Primary Reference: CYB5B\_HUMAN

Search ID: 73917

Search Name: 20141113\_QLhumanTMT6lowres\_Obj14178\_CETSA\_1103\_Set1\_Fraction\_07

Scan#: 35875

Observed Mass: 964.9518 (-6.4 ppm)

PSM Score: 54.46

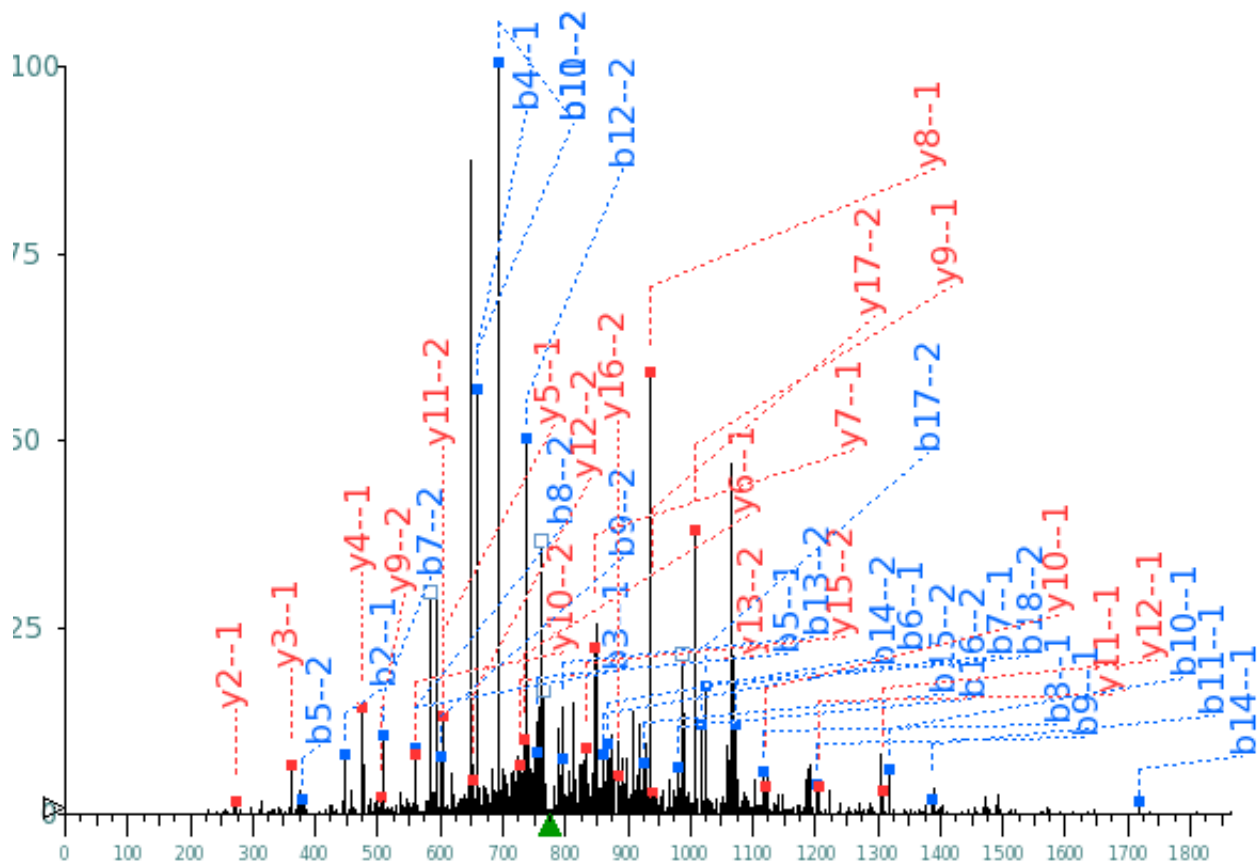

# SEIVPLFTSLASDEQDSVR (+3)

Primary Reference: 2AAB\_HUMAN

Search ID: 73917

Search Name: 20141113\_QLhumanTMT6lowres\_Obj14178\_CETSA\_1103\_Set1\_Fraction\_07

Scan#: 38702

Observed Mass: 774.734 (-6.6 ppm)

PSM Score: 35.5

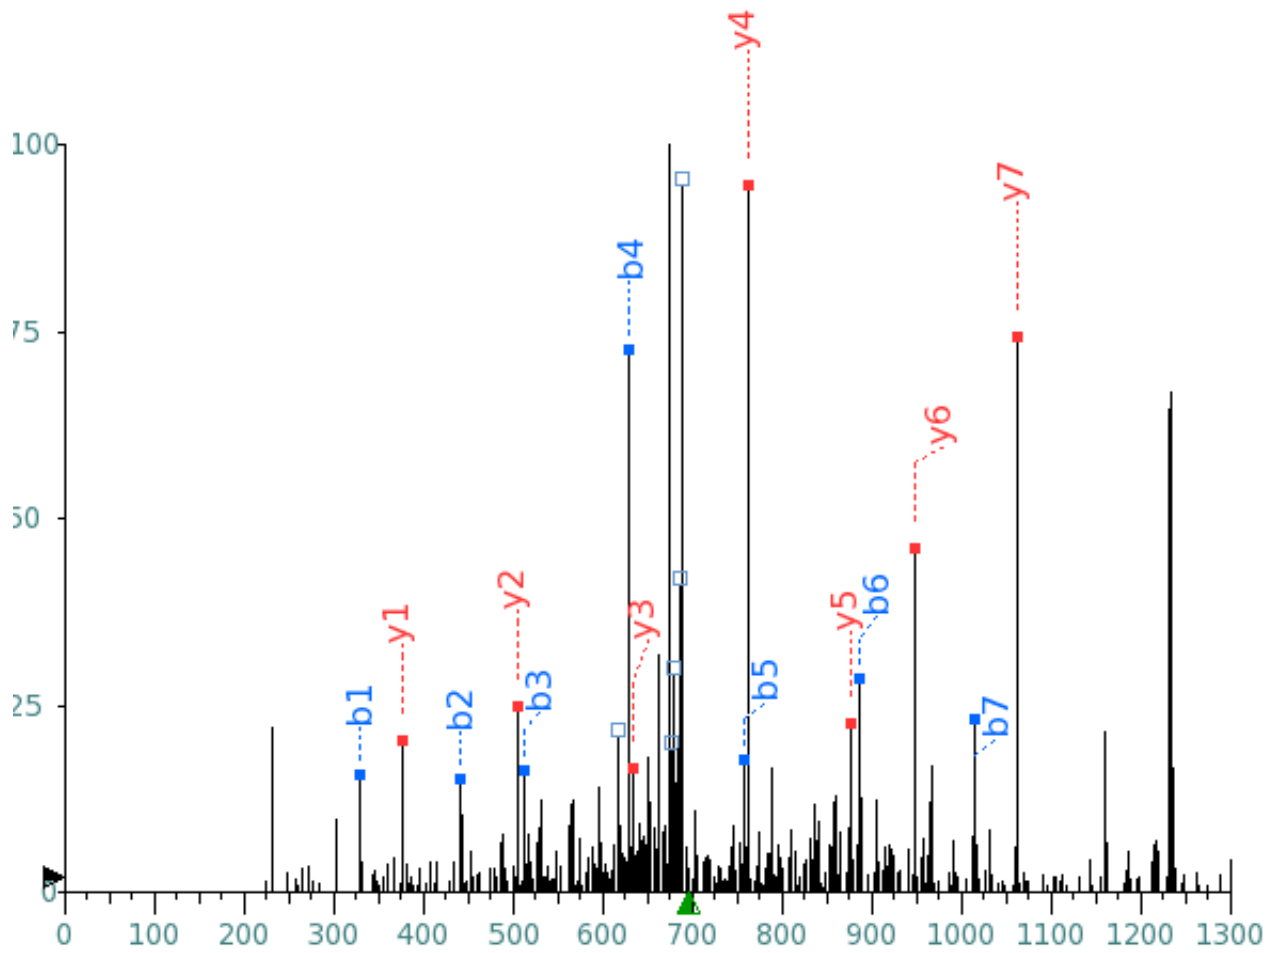

# VIADEEQK (+2)

Primary Reference: TRI44\_HUMAN

Search ID: 73918

Search Name: 20141113\_QLhumanTMT6lowres\_Obj14178\_CETSA\_1103\_Set1\_Fraction\_08

Scan#: 15611

Observed Mass: 695.3975 (-8 ppm)

PSM Score: 32.16

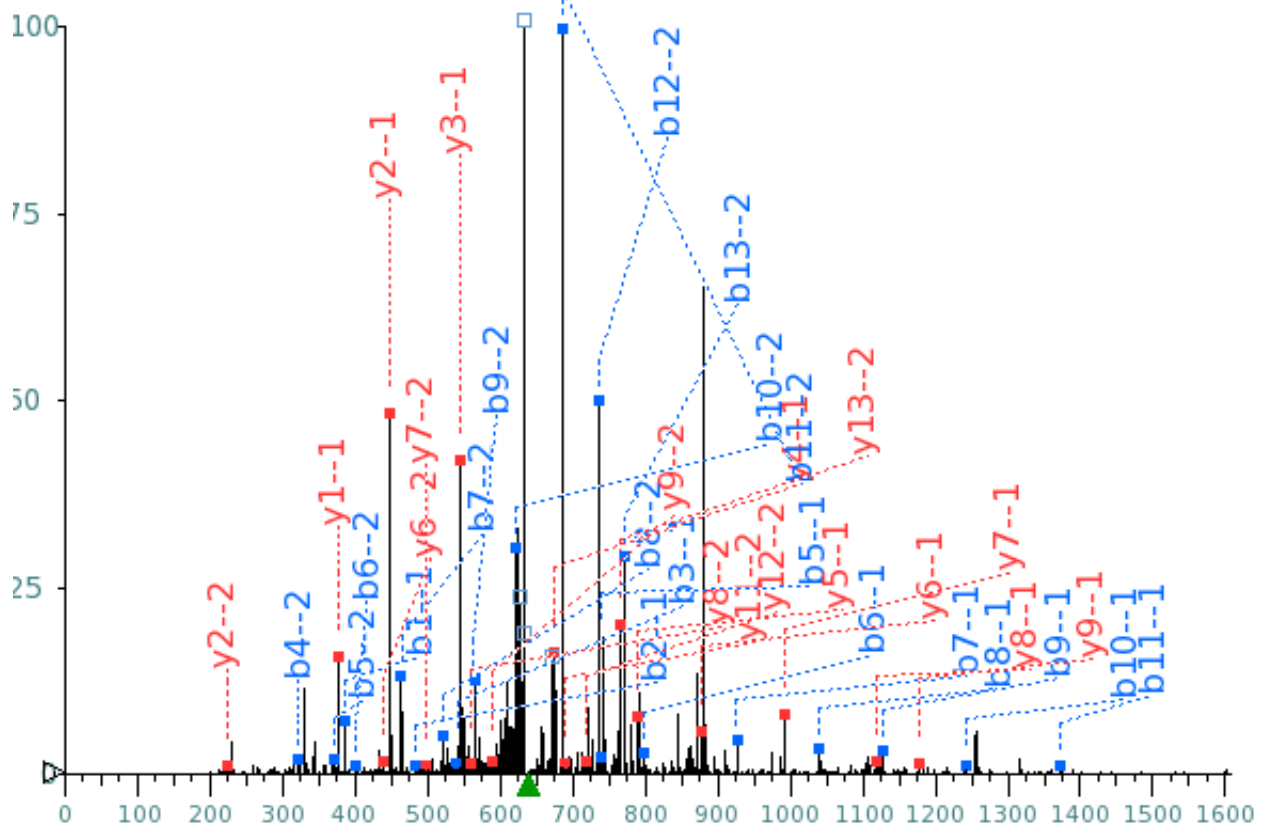

# RPGVTGENSNEVAK (+3)

Primary Reference: POGZ\_HUMAN

Search ID: 73919

Search Name: 20141113\_QLhumanTMT6lowres\_Obj14178\_CETSA\_1103\_Set1\_Fraction\_09

Scan#: 11670

Observed Mass: 639.3556 (-4.1 ppm)

PSM Score: 15.7

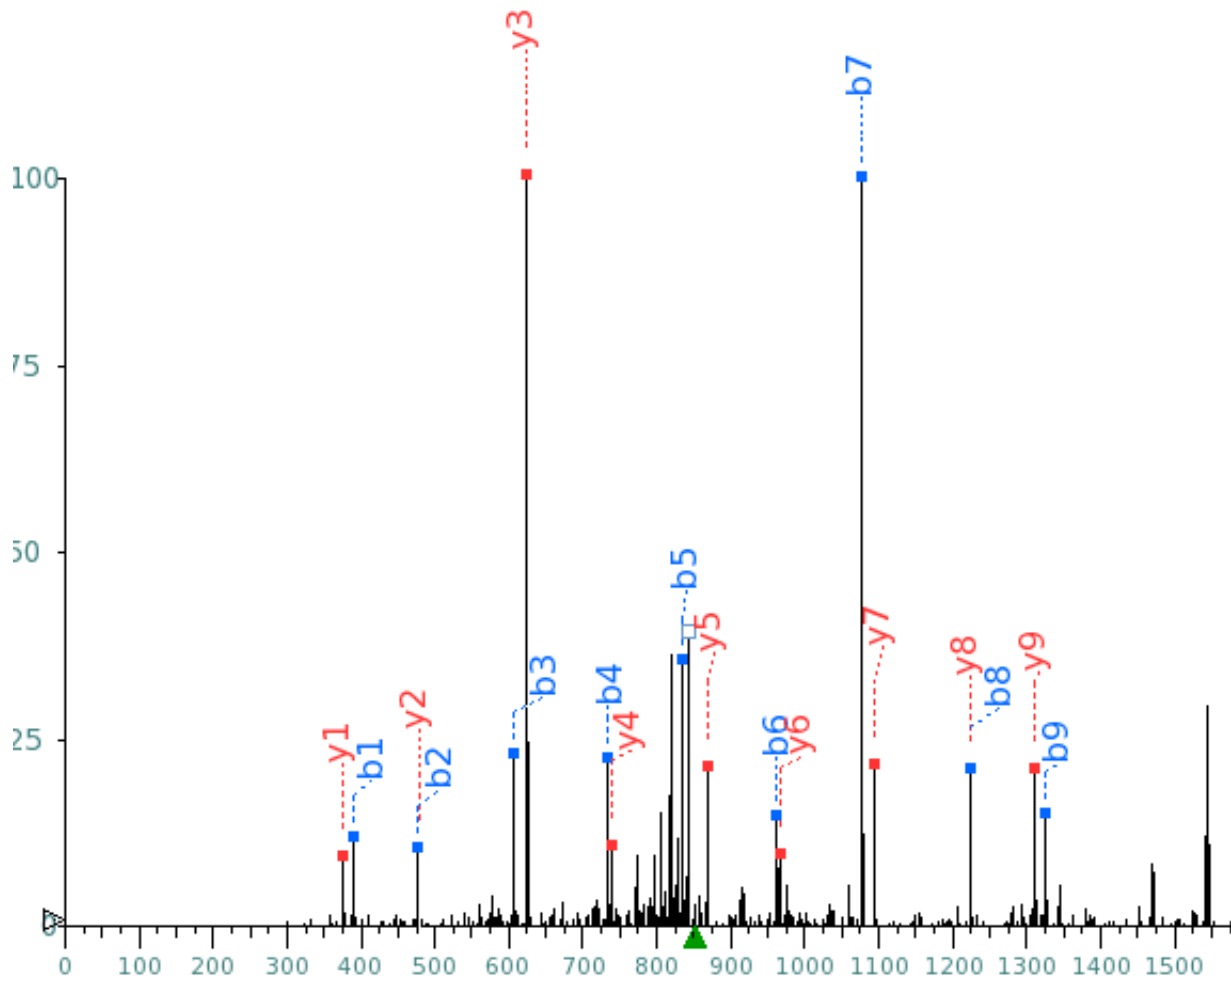

# CSEQVQDFTK (+2)

Primary Reference: COXAM\_HUMAN

Search ID: 73919

Search Name: 20141113\_QLhumanTMT6lowres\_Obj14178\_CETSA\_1103\_Set1\_Fraction\_09

Scan#: 19358

Observed Mass: 850.4345 (-6.4 ppm)

PSM Score: 48.72



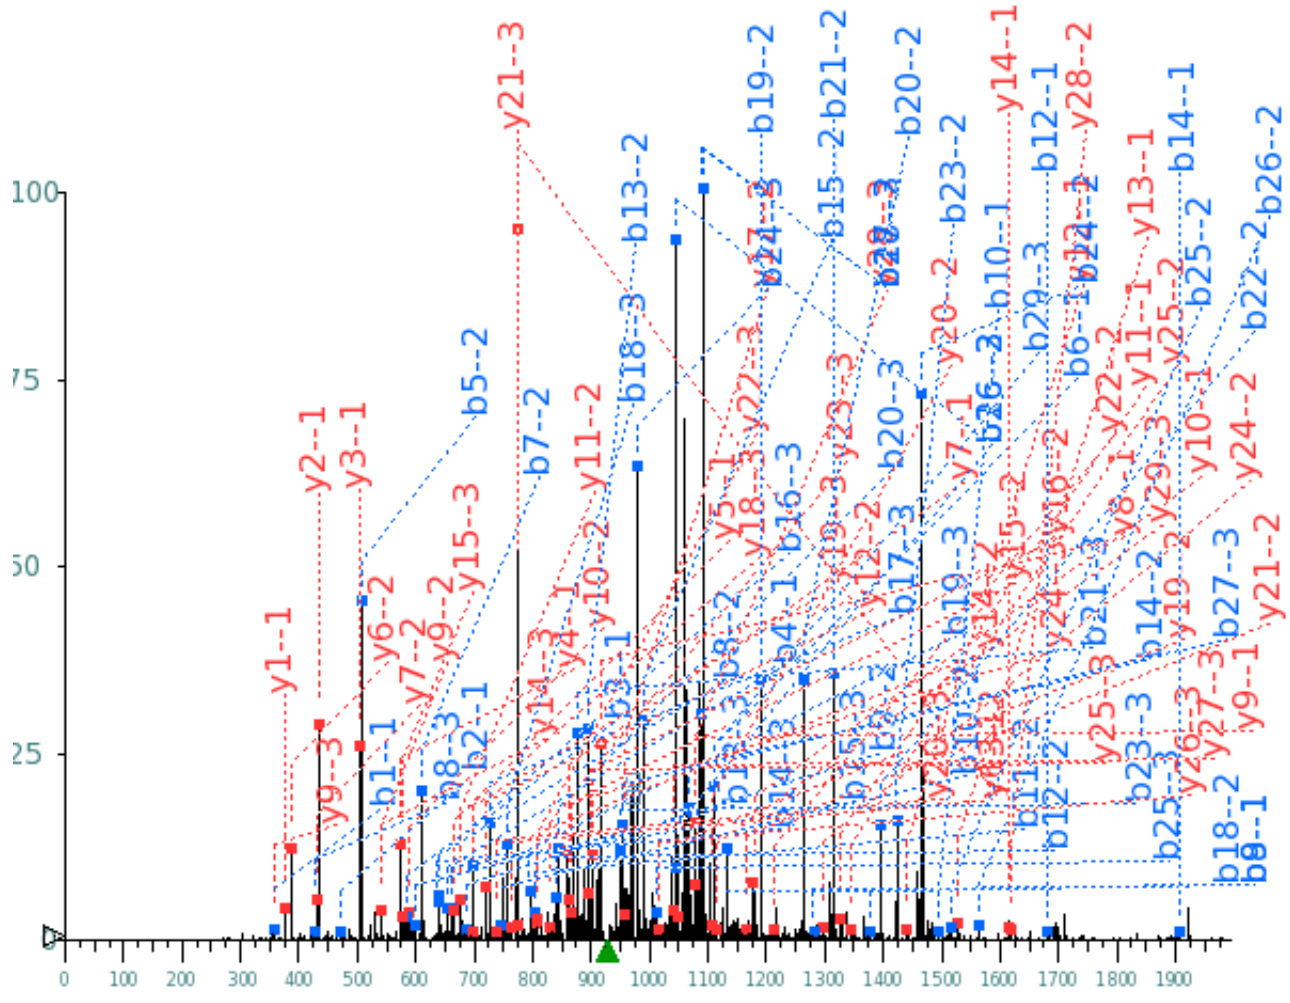

# ELLAKPIGPDDAIDALSSDFTCGSPTAAGK (+4)

Primary Reference: B2RCJ7\_HUMAN

Search ID: 73919

Search Name: 20141113\_QLhumanTMT6lowres\_Obj14178\_CETSA\_1103\_Set1\_Fraction\_09

Scan#: 40245

Observed Mass: 926.9912 (-6.2 ppm)

PSM Score: 51.43

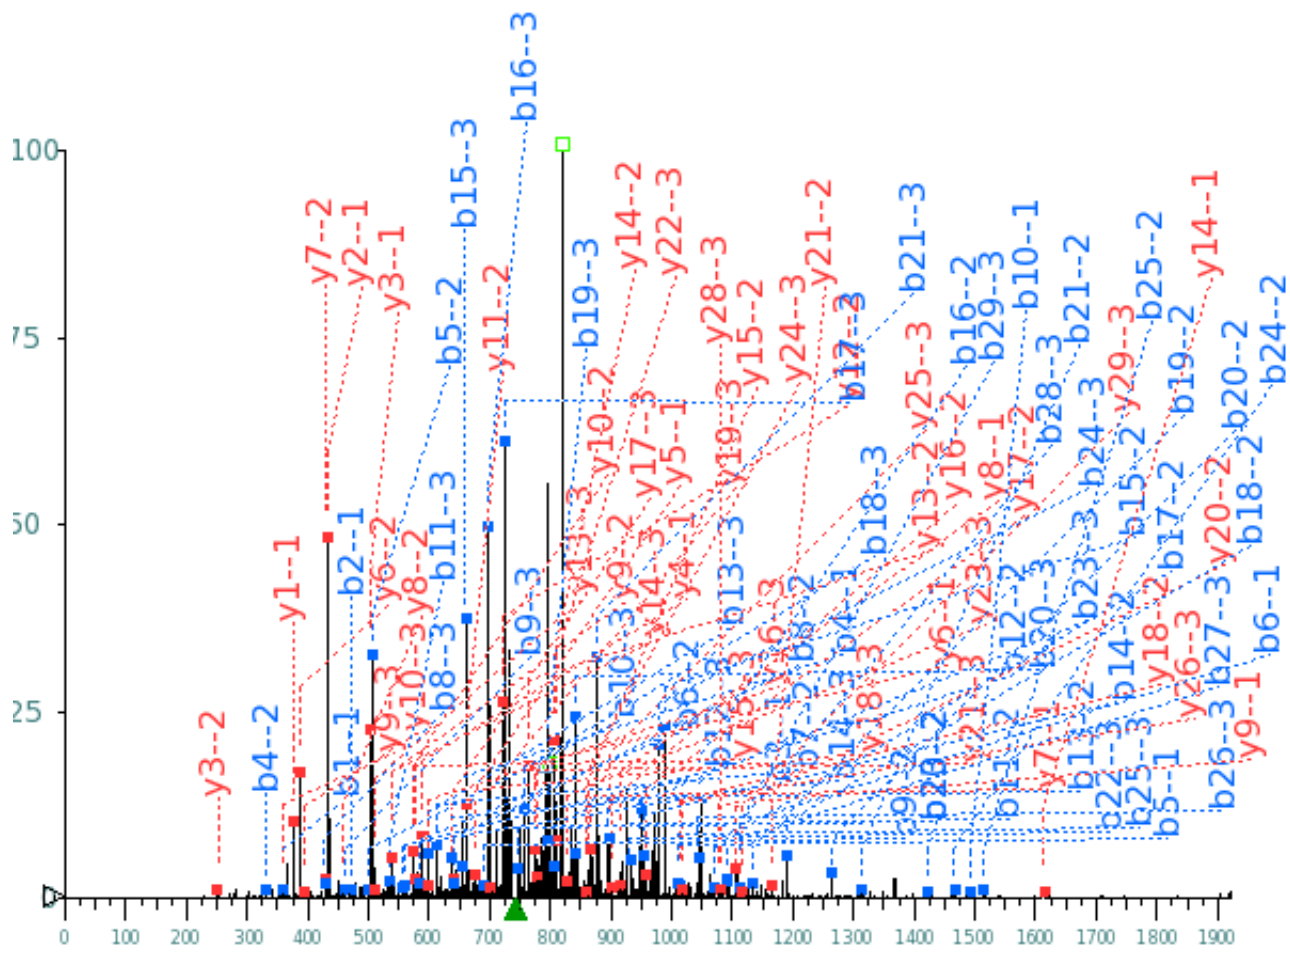

# ELLAKPIGPDDAIDALSSDFTCGSPTAAGK (+5)

Primary Reference: B2RCJ7\_HUMAN

Search ID: 73919

Search Name: 20141113\_QLhumanTMT6lowres\_Obj14178\_CETSA\_1103\_Set1\_Fraction\_09

Scan#: 40272

Observed Mass: 741.7941 (-6.6 ppm)

PSM Score: 19.03

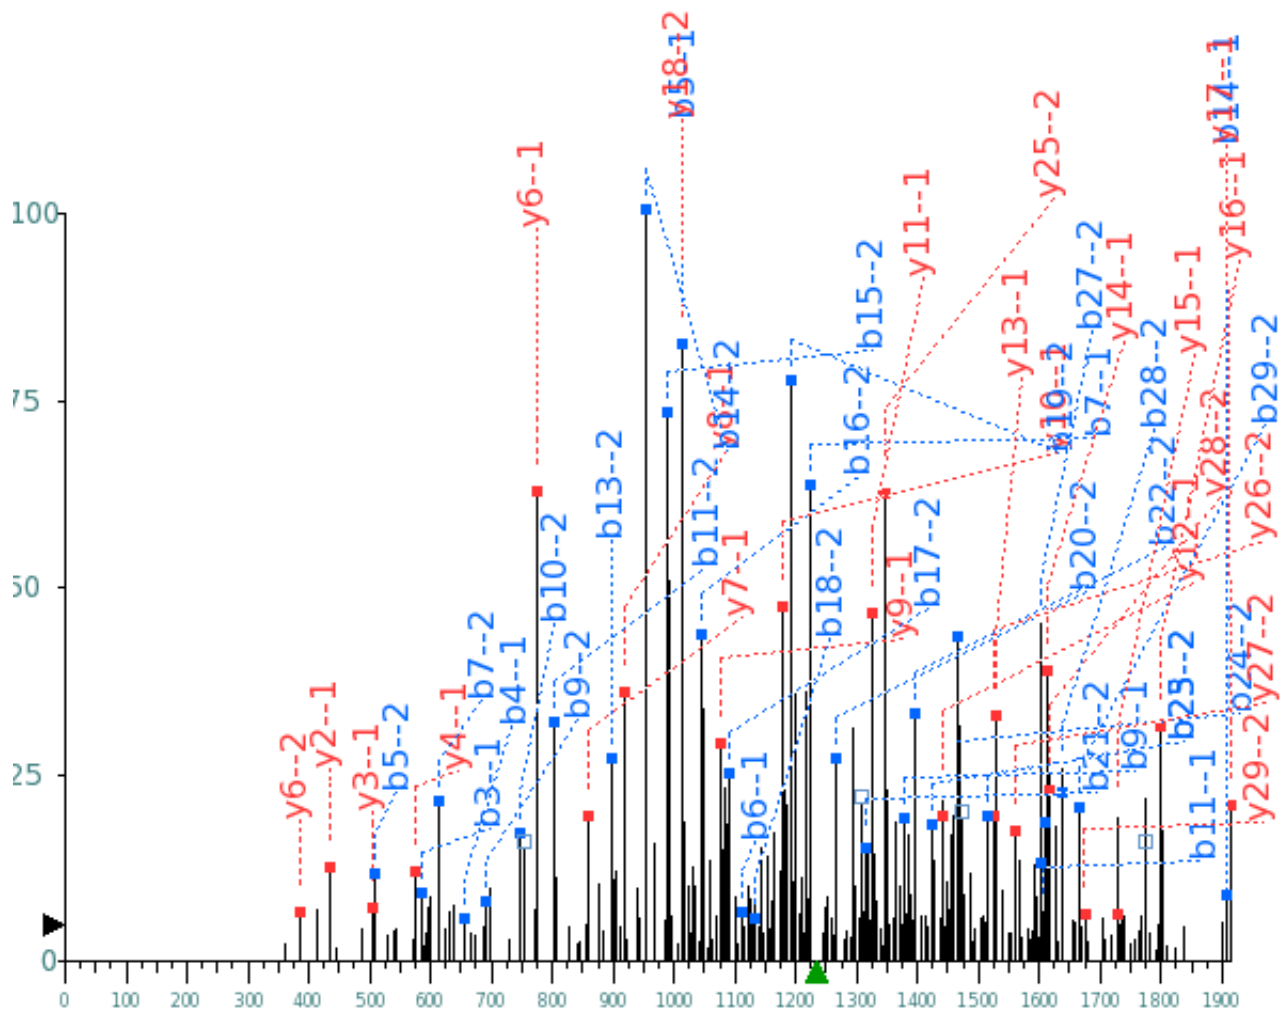

# ELLAKPIGPDDAIDALSSDFTCGSPTAAGK (+3)

Primary Reference: B2RCJ7\_HUMAN

Search ID: 73919

Search Name: 20141113\_QLhumanTMT6lowres\_Obj14178\_CETSA\_1103\_Set1\_Fraction\_09

Scan#: 40326

Observed Mass: 1235.6508 (-7.6 ppm)

PSM Score: 94.56

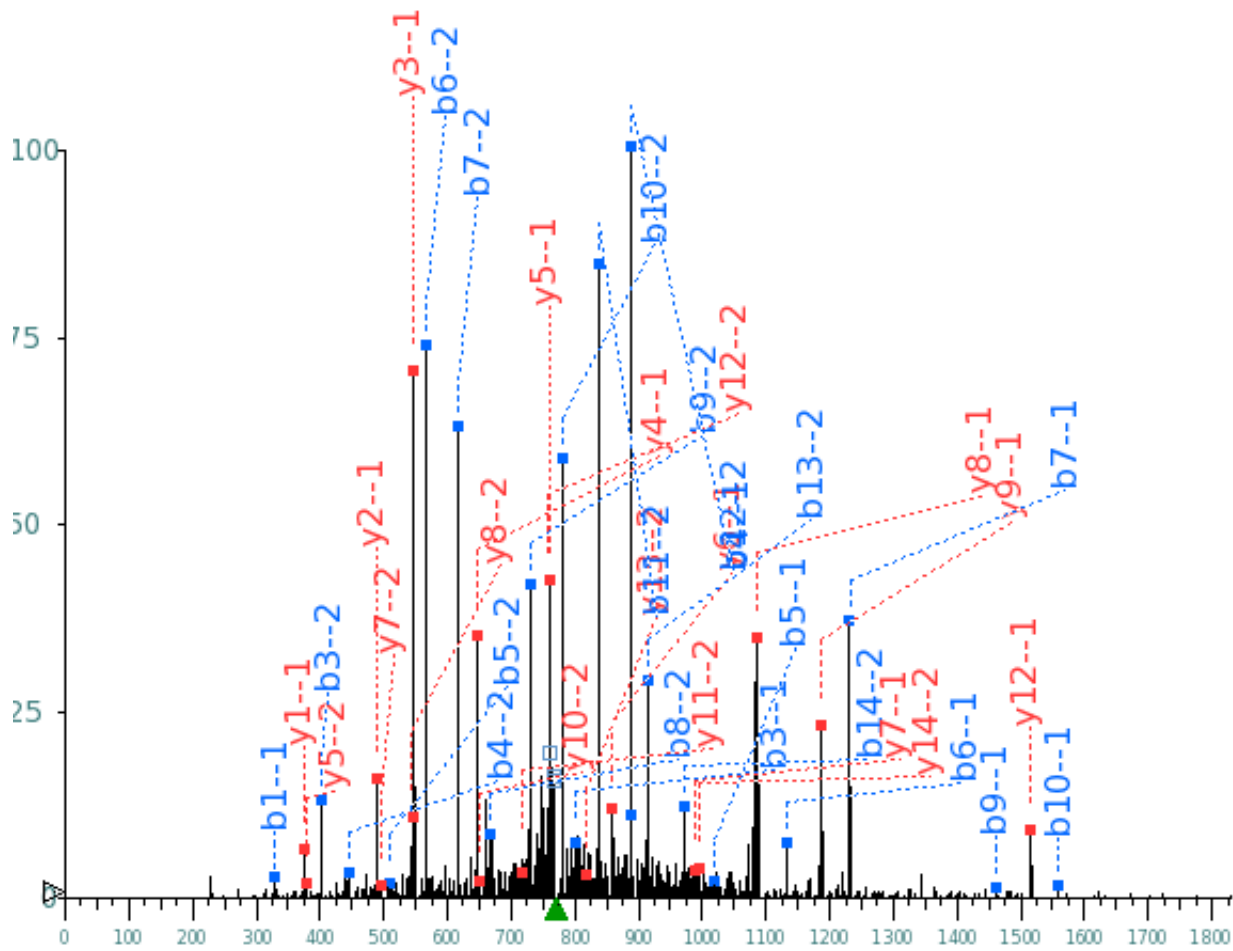

# VKDSQDVPMLVGNK (+3)

Primary Reference: RASK\_HUMAN

Search ID: 73956

Search Name: 20141113\_QLhumanTMT6lowres\_Obj14178\_CETSA\_1103\_Set1\_Fraction\_10

Scan#: 28898

Observed Mass: 773.1125 (-7.5 ppm)

PSM Score: 42.23

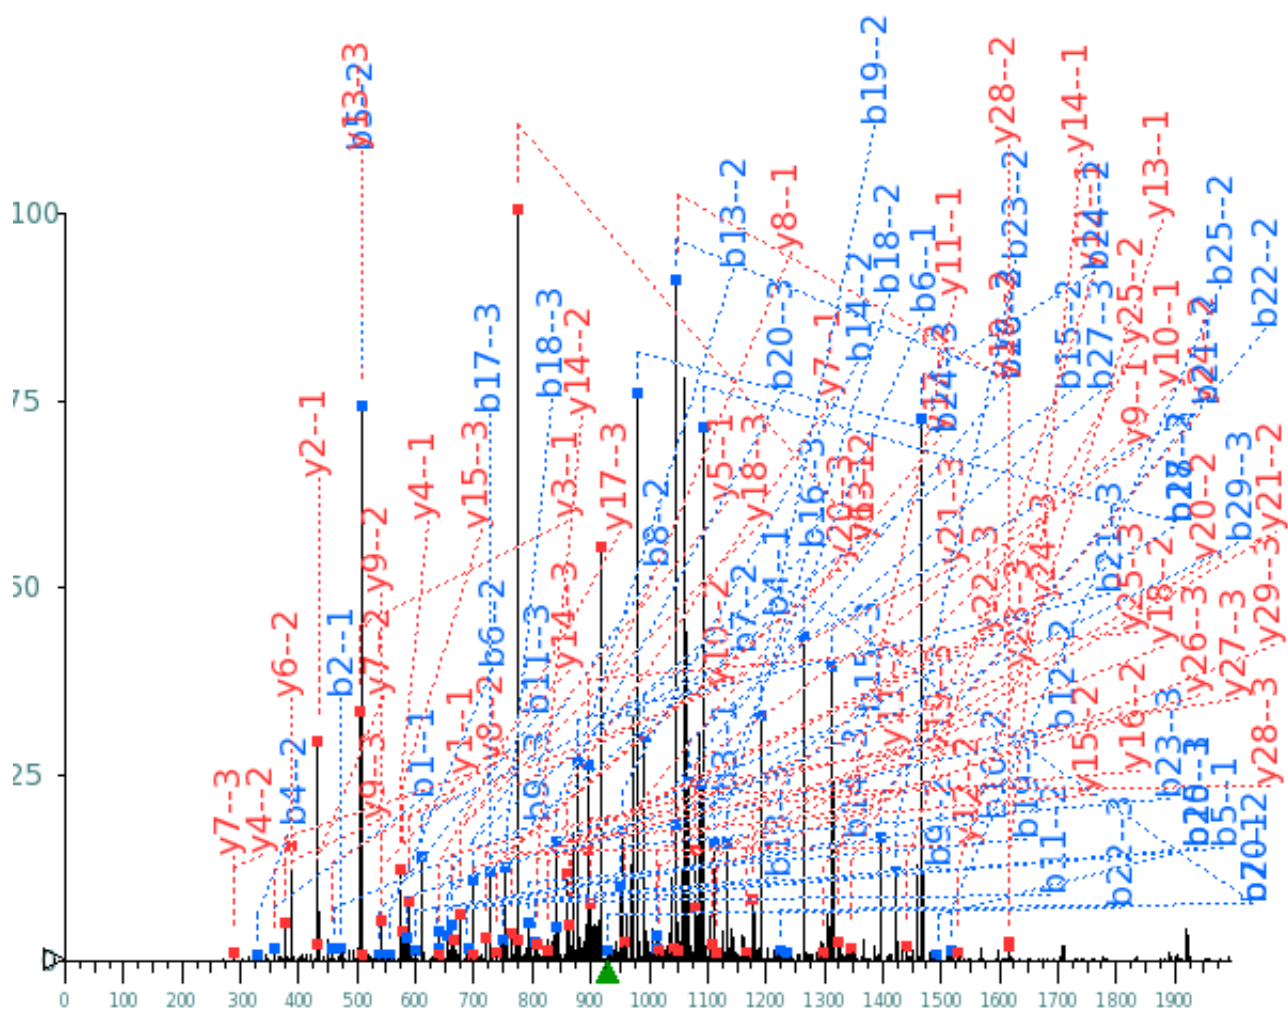

# ELLAKPIGPDDAIDALSSDFTCGSPTAAGK (+4)

Primary Reference: B2RCJ7\_HUMAN

Search ID: 73956

Search Name: 20141113\_QLhumanTMT6lowres\_Obj14178\_CETSA\_1103\_Set1\_Fraction\_10

Scan#: 41254

Observed Mass: 926.9897 (-7.8 ppm)

PSM Score: 52.38

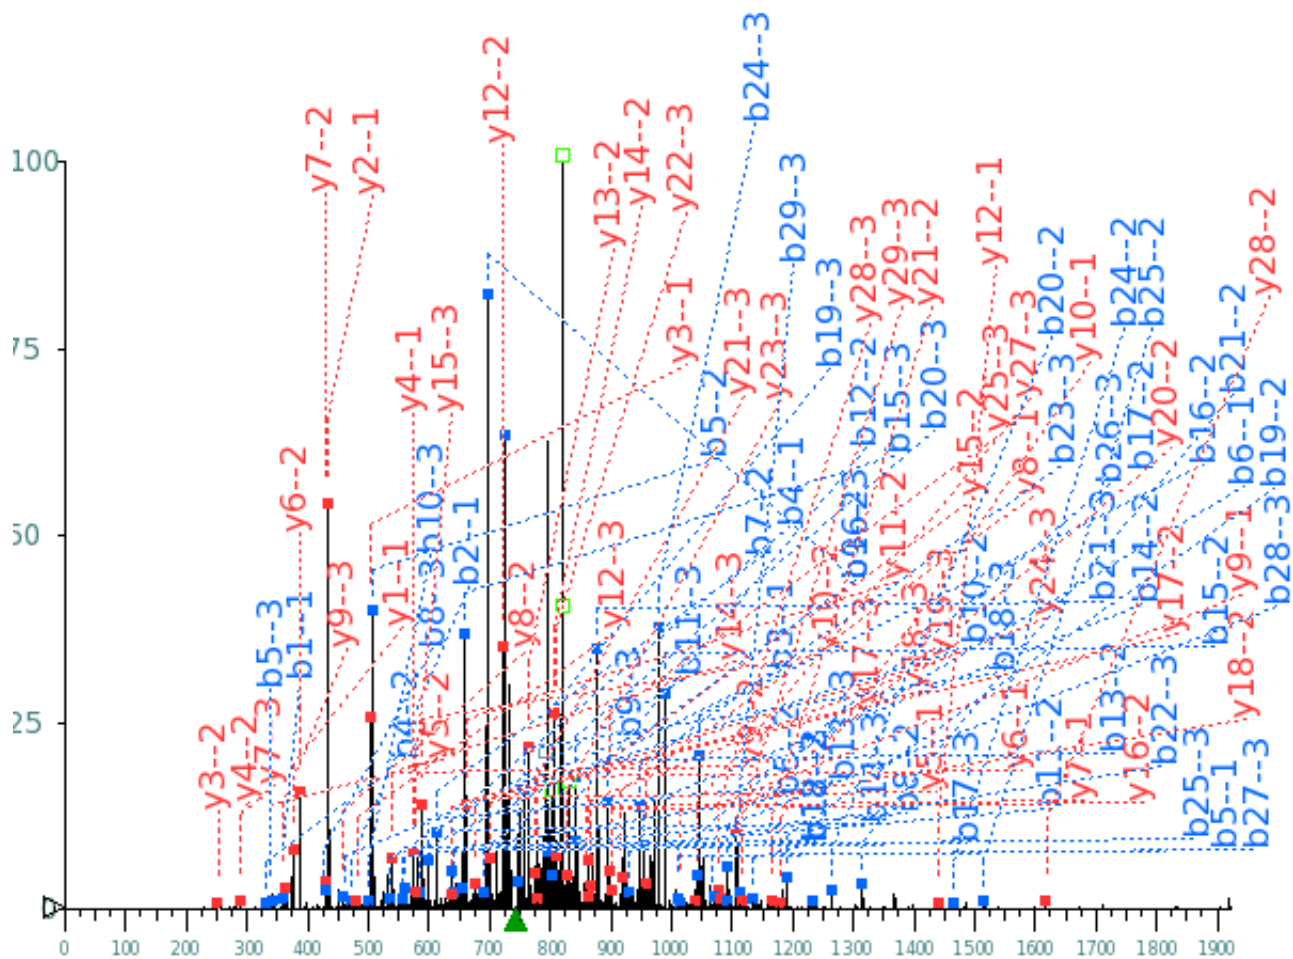

# ELLAKPIGPDDAIDALSSDFTCGSPTAAGK (+5)

Primary Reference: B2RCJ7\_HUMAN

Search ID: 73956

Search Name: 20141113\_QLhumanTMT6lowres\_Obj14178\_CETSA\_1103\_Set1\_Fraction\_10

Scan#: 41259

Observed Mass: 741.7931 (-8 ppm)

PSM Score: 37.62

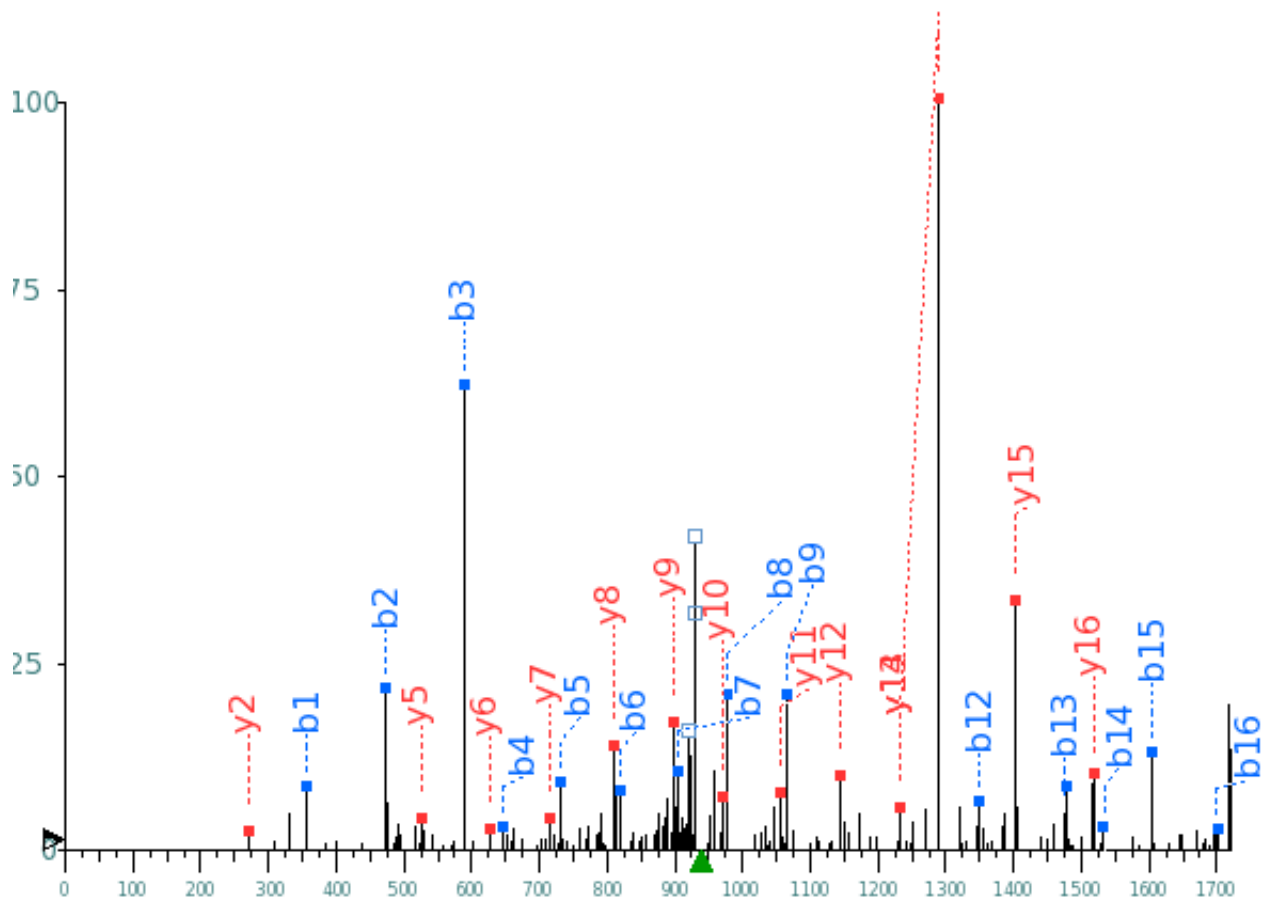

# QDDGSSASPSVQGAPR (+2)

Primary Reference: WASH6\_HUMAN

Search ID: 73957

Search Name: 20141113\_QLhumanTMT6lowres\_Obj14178\_CETSA\_1103\_Set1\_Fraction\_11

Scan#: 12409

Observed Mass: 937.9484 (-7.8 ppm)

PSM Score: 68.03

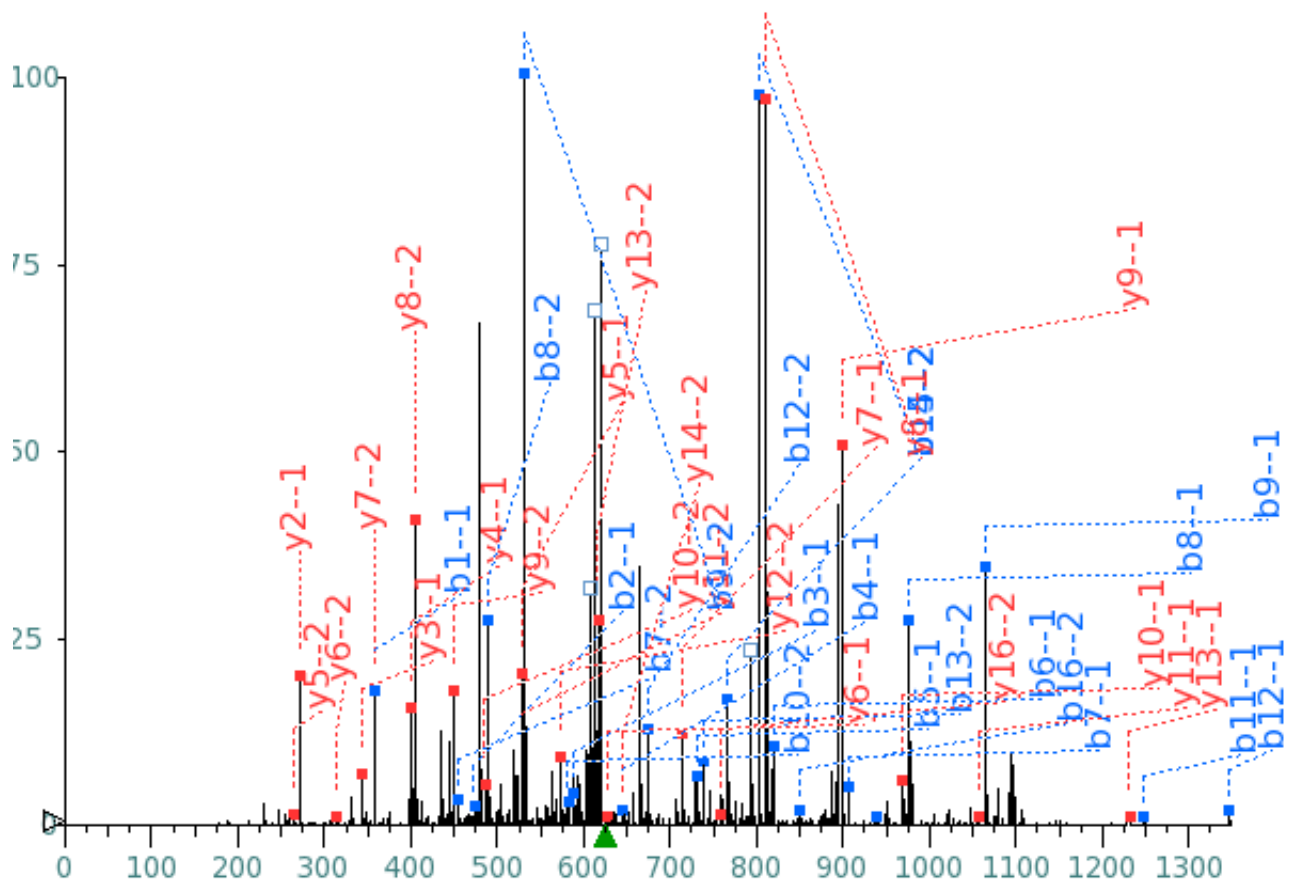

# QDDGSSASPSVQGAPR (+3)

Primary Reference: WASH6\_HUMAN  
 Search ID: 73957

Search Name: 20141113\_QLhumanTMT6lowres\_Obj14178\_CETSA\_1103\_Set1\_Fraction\_11  
 Scan#: 12429

Observed Mass: 625.6346 (-8 ppm)  
 PSM Score: 41.39



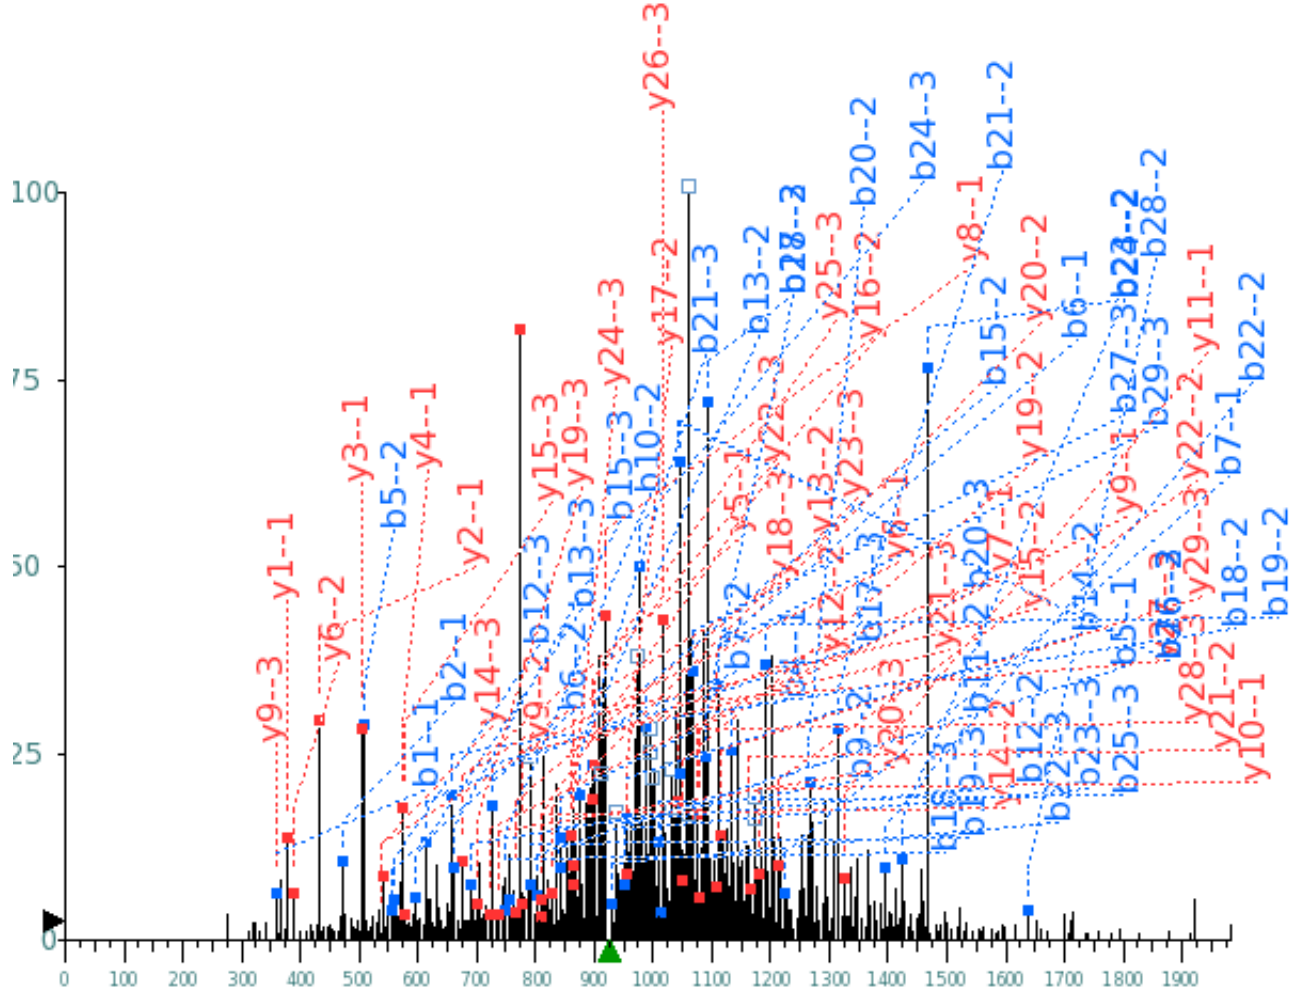

# ELLAKPIGPDDAIDALSSDFTCGSPTAAGK (+4)

Primary Reference: B2RCJ7\_HUMAN

Search ID: 73957

Search Name: 20141113\_QLhumanTMT6lowres\_Obj14178\_CETSA\_1103\_Set1\_Fraction\_11

Scan#: 40907

Observed Mass: 926.9925 (-4.8 ppm)

PSM Score: 21.19

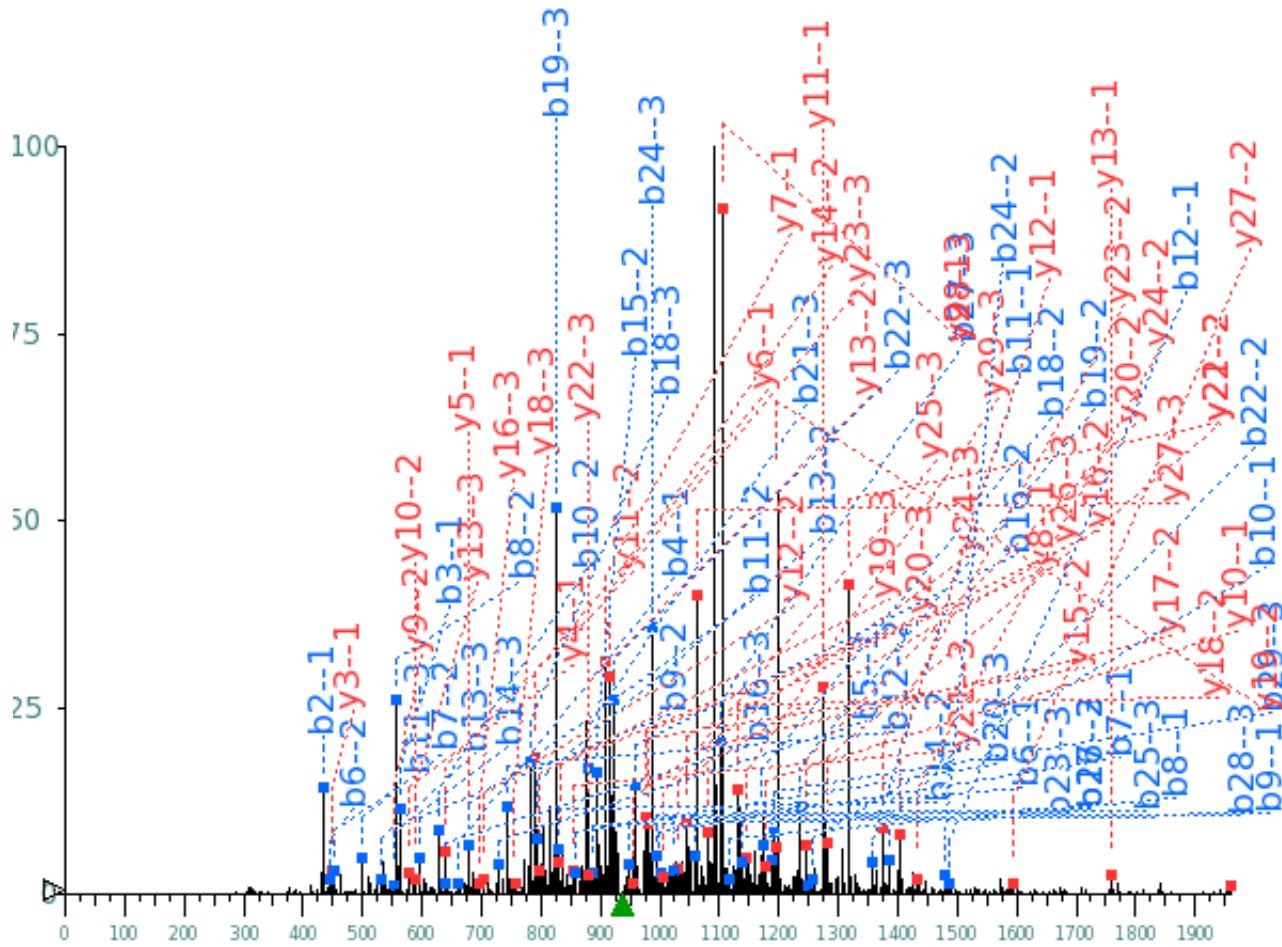

# SDEPARDDAAVETAEAKEPAEADITELCR (+4)

Primary Reference: BL1S2\_HUMAN

Search ID: 73994

Search Name: 20141113\_QLhumanTMT6lowres\_Obj14178\_CETSA\_1103\_Set1\_Fraction\_12

Scan#: 29273

Observed Mass: 937.4489 (-8.8 ppm)

PSM Score: 36.97

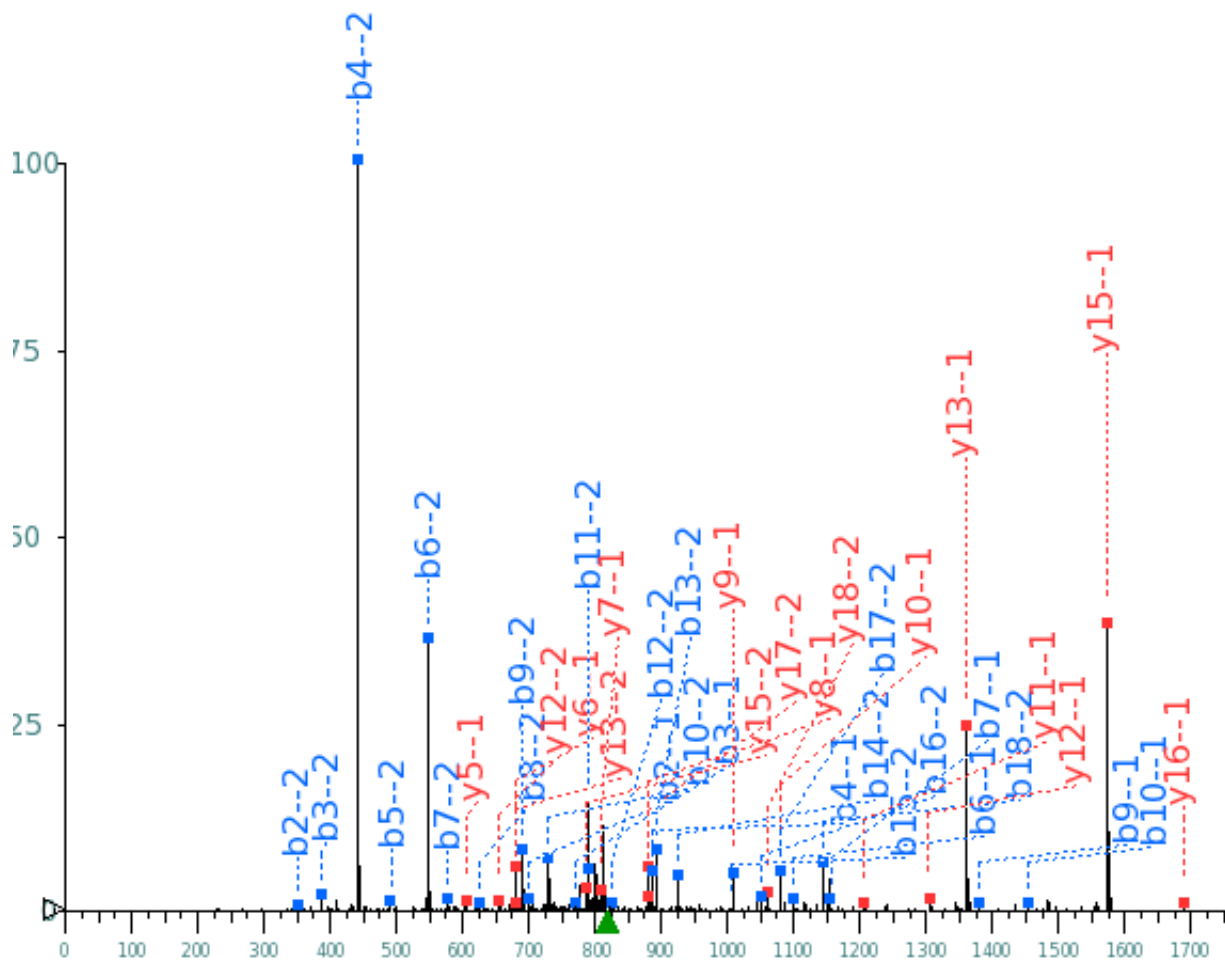

# IKADPDGPEAQAEACSGR (+3)

Primary Reference: NHP2\_HUMAN

Search ID: 73995

Search Name: 20141113\_QLhumanTMT6lowres\_Obj14178\_CETSA\_1103\_Set1\_Fraction\_13

Scan#: 17375

Observed Mass: 820.4067 (-7.3 ppm)

PSM Score: 64.45

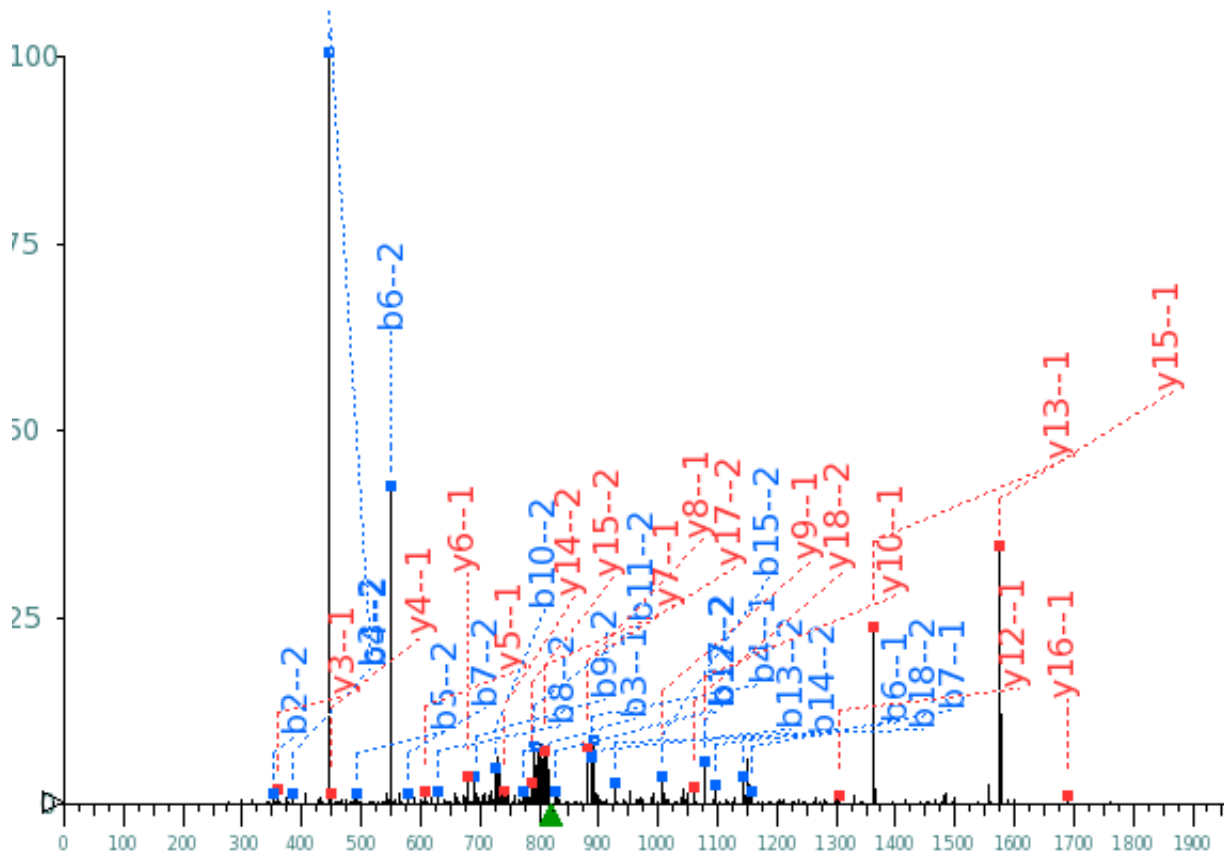

# IKADPDGPEAQAEACSGER (+3)

Primary Reference: NHP2\_HUMAN

Search ID: 74001

Search Name: 20141113\_QLhumanTMT6lowres\_Obj14178\_CETSA\_1103\_Set1\_Fraction\_14

Scan#: 17489

Observed Mass: 820.4071 (-6.9 ppm)

PSM Score: 52.48

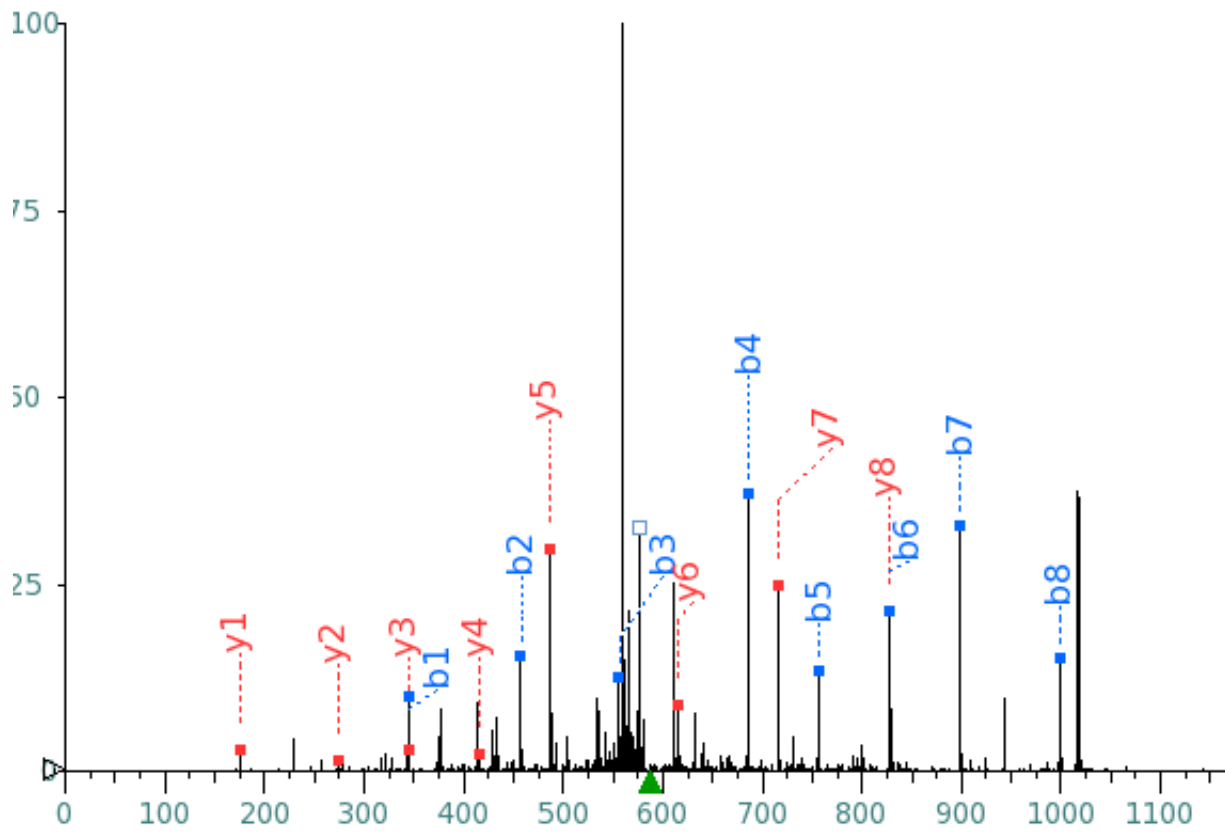

# NIVEAAVR (+2)

Primary Reference: RS26L\_HUMAN

Search ID: 74001

Search Name: 20141113\_QLhumanTMT6lowres\_Obj14178\_CETSA\_1103\_Set1\_Fraction\_14

Scan#: 18104

Observed Mass: 586.3489 (-7.8 ppm)

PSM Score: 43.8

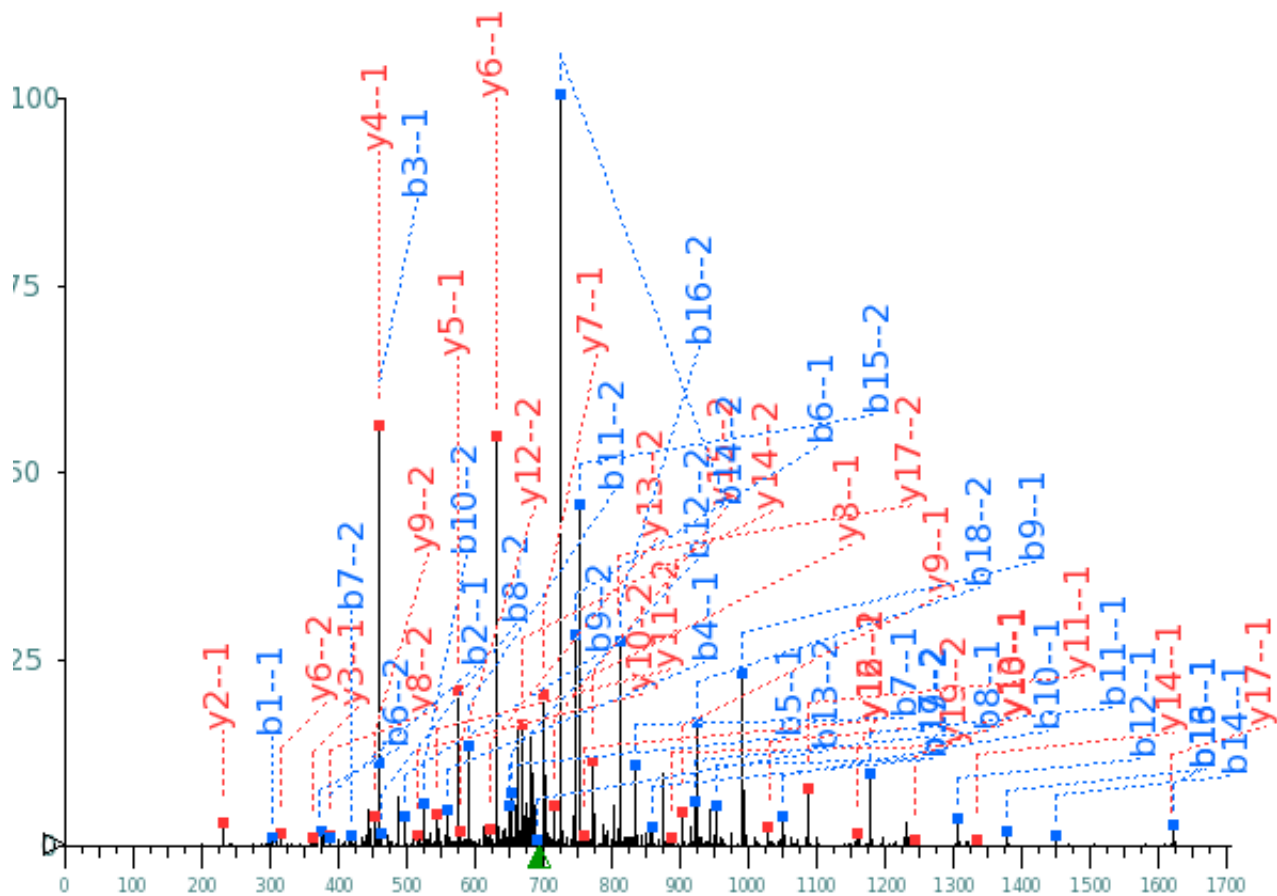

# ASATSVSSAGEQAAGDPEGR (+3)

Primary Reference: PANK2\_HUMAN

Search ID: 74002

Search Name: 20141113\_QLhumanTMT6lowres\_Obj14178\_CETSA\_1103\_Set1\_Fraction\_15

Scan#: 15528

Observed Mass: 692.9995 (-7.5 ppm)

PSM Score: 82.48

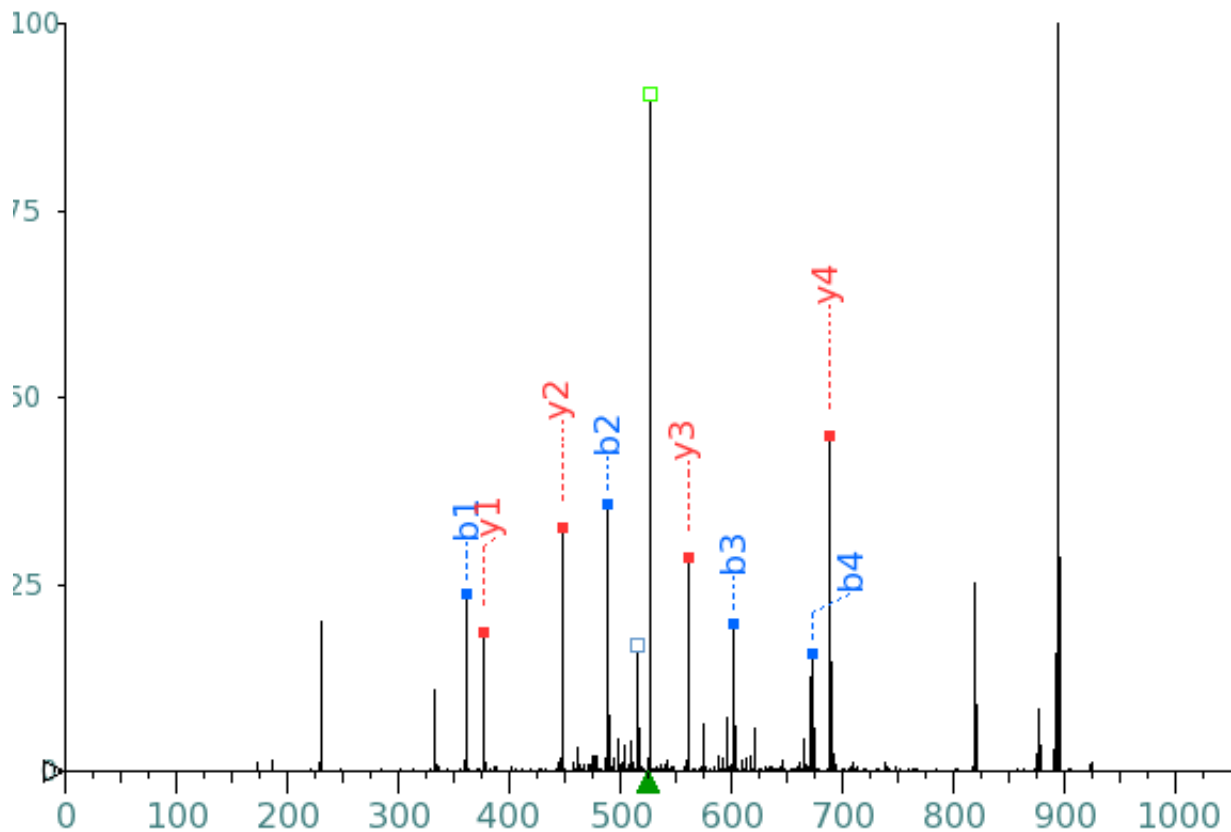

# MQLAK (+2)

Primary Reference: GSTM2\_HUMAN

Search ID: 74002

Search Name: 20141113\_QLhumanTMT6lowres\_Obj14178\_CETSA\_1103\_Set1\_Fraction\_15

Scan#: 17273

Observed Mass: 524.8292 (-7.5 ppm)

PSM Score: 15.62

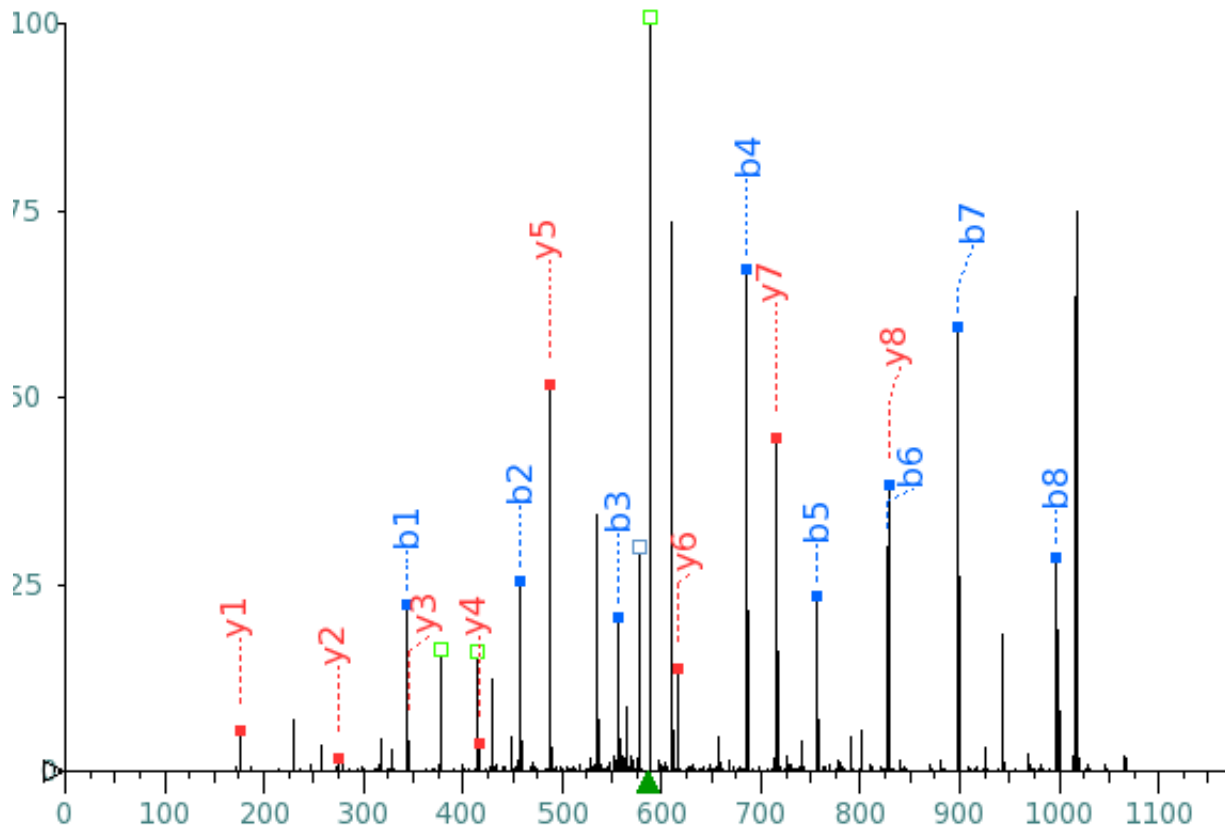

# NIVEAAVR (+2)

Primary Reference: RS26L\_HUMAN

Search ID: 74002

Search Name: 20141113\_QLhumanTMT6lowres\_Obj14178\_CETSA\_1103\_Set1\_Fraction\_15

Scan#: 17570

Observed Mass: 586.3499 (-6.1 ppm)

PSM Score: 42.26



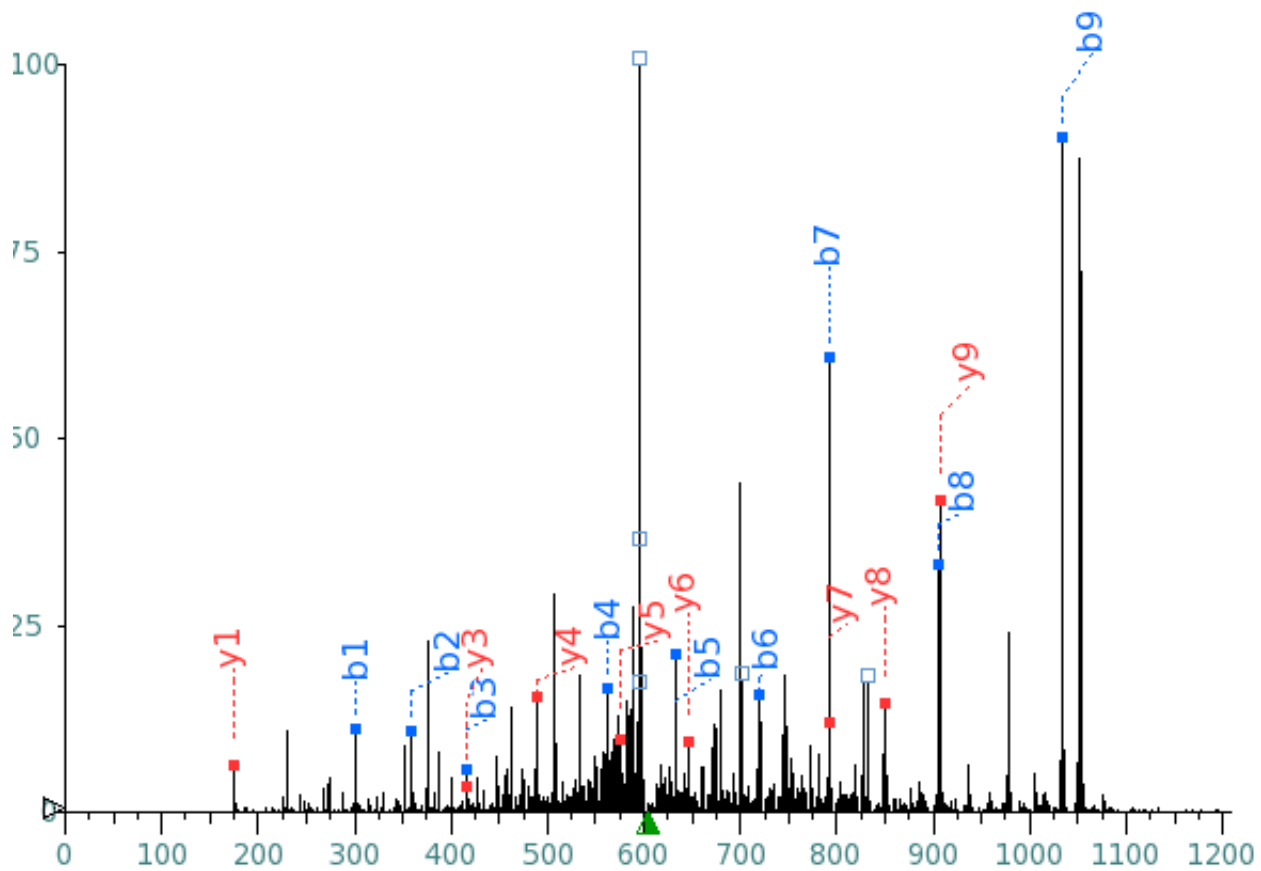

# AGGFASALER (+2)

Primary Reference: RT28\_HUMAN

Search ID: 74002

Search Name: 20141113\_QLhumanTMT6lowres\_Obj14178\_CETSA\_1103\_Set1\_Fraction\_15

Scan#: 20321

Observed Mass: 604.3306 (-7.8 ppm)

PSM Score: 28.15

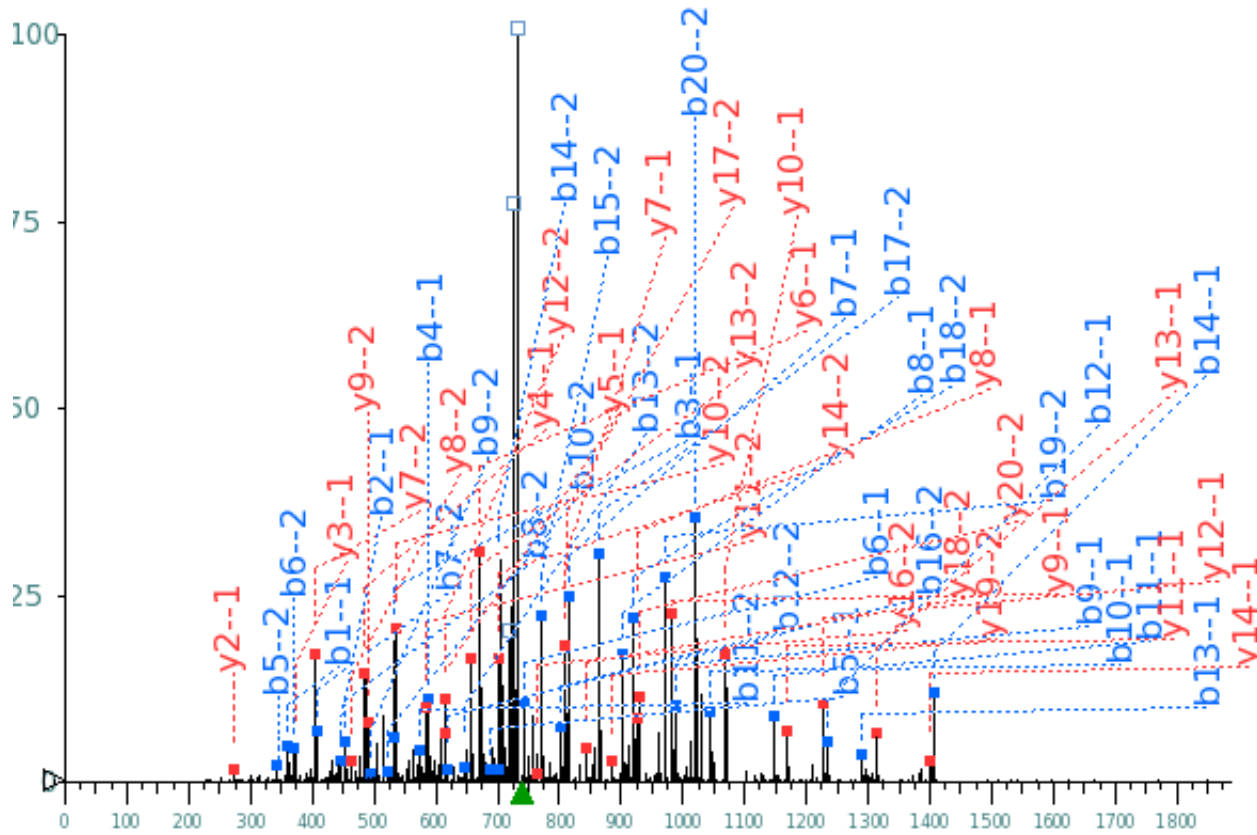

# QSSGPGASSGTSGDHGELVVR (+3)

Primary Reference: E9PL71\_HUMAN

Search ID: 74005

Search Name: 20141113\_QLhumanTMT6lowres\_Obj14178\_CETSA\_1103\_Set1\_Fraction\_16

Scan#: 12989

Observed Mass: 738.701 (-2.9 ppm)

PSM Score: 81.11

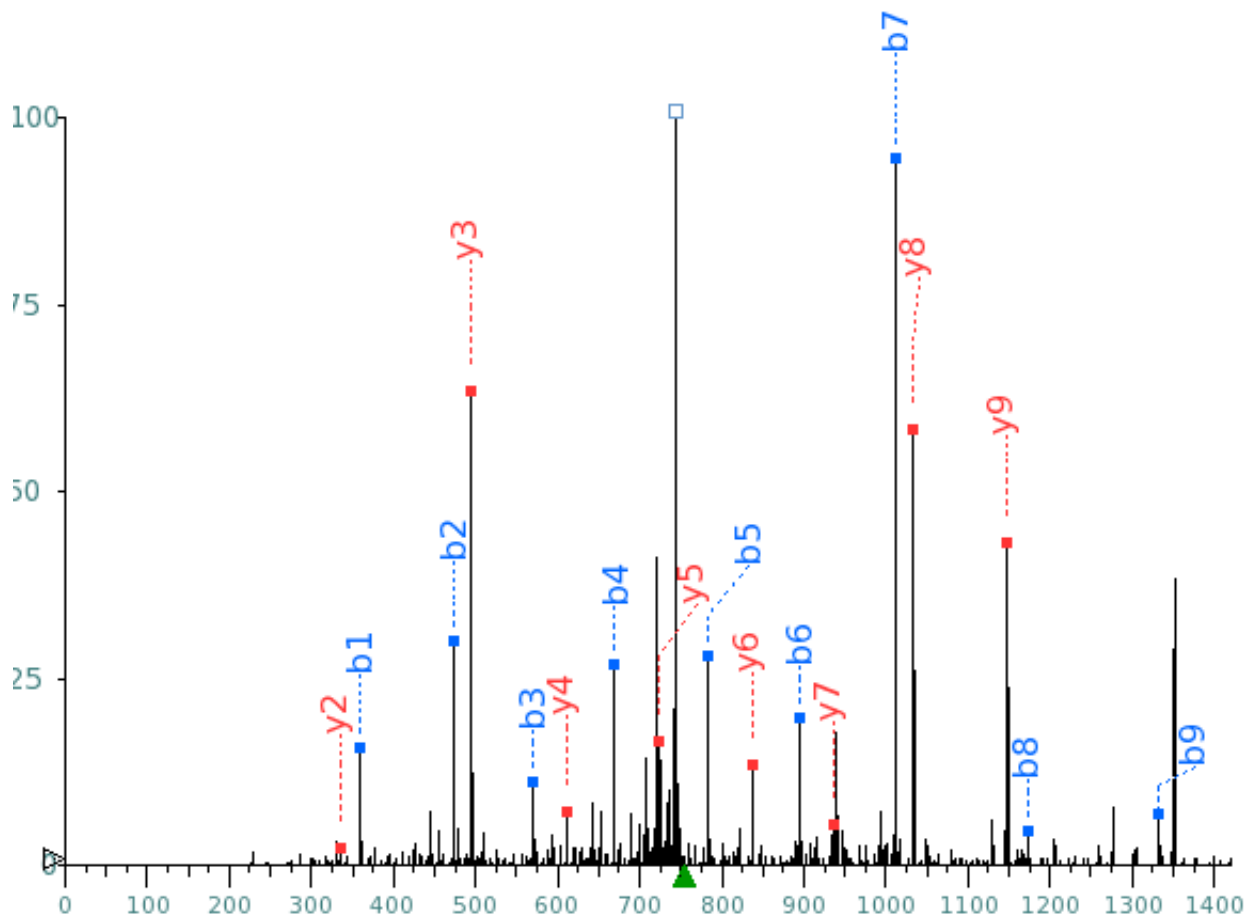

# ENPVINDCCR (+2)

Primary Reference: F115A\_HUMAN

Search ID: 74005

Search Name: 20141113\_QLhumanTMT6lowres\_Obj14178\_CETSA\_1103\_Set1\_Fraction\_16

Scan#: 14784

Observed Mass: 753.3497 (-7.8 ppm)

PSM Score: 39.54

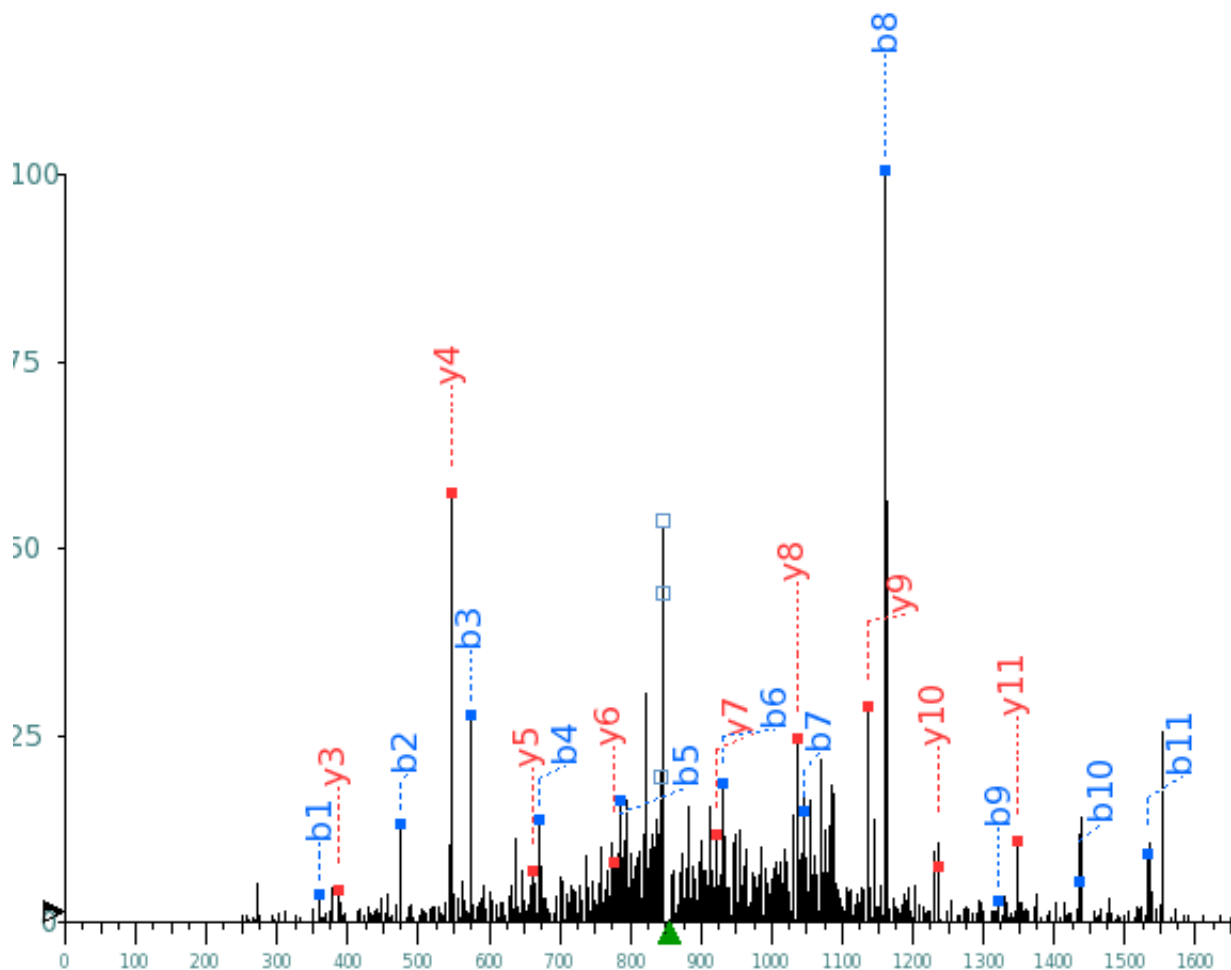

# ENVVNFIDCLVR (+2)

Primary Reference: ORC3\_HUMAN

Search ID: 74005

Search Name: 20141113\_QLhumanTMT6lowres\_Obj14178\_CETSA\_1103\_Set1\_Fraction\_16

Scan#: 41809

Observed Mass: 853.9521 (-7.5 ppm)

PSM Score: 28.93

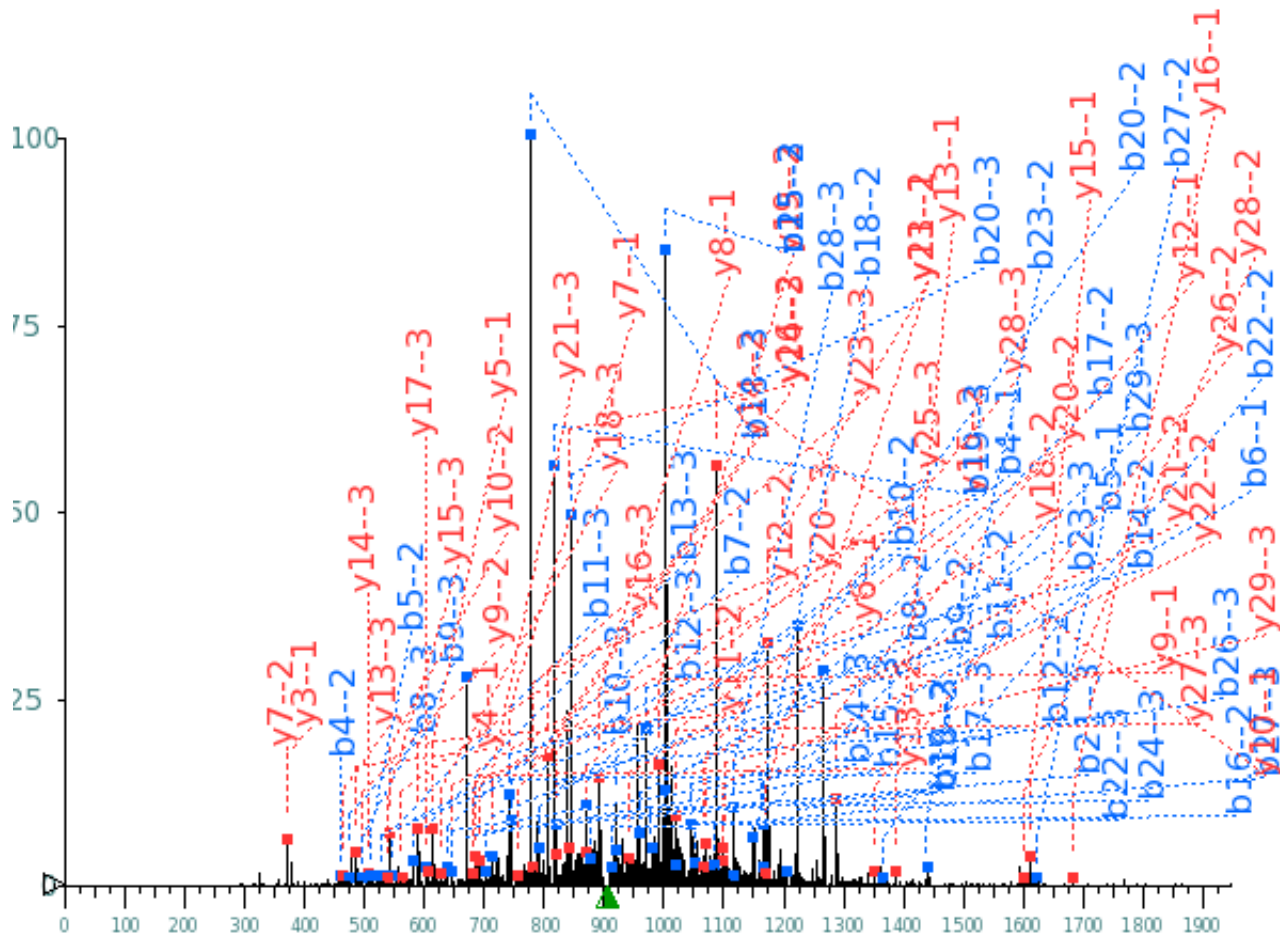

# SVFKPFIFGVGVAQAPQVLSPTFGAQPVR (+4)

Primary Reference: B7Z8S7\_HUMAN

Search ID: 74005

Search Name: 20141113\_QLhumanTMT6lowres\_Obj14178\_CETSA\_1103\_Set1\_Fraction\_16

Scan#: 44201

Observed Mass: 905.2559 (-6.4 ppm)

PSM Score: 31.78

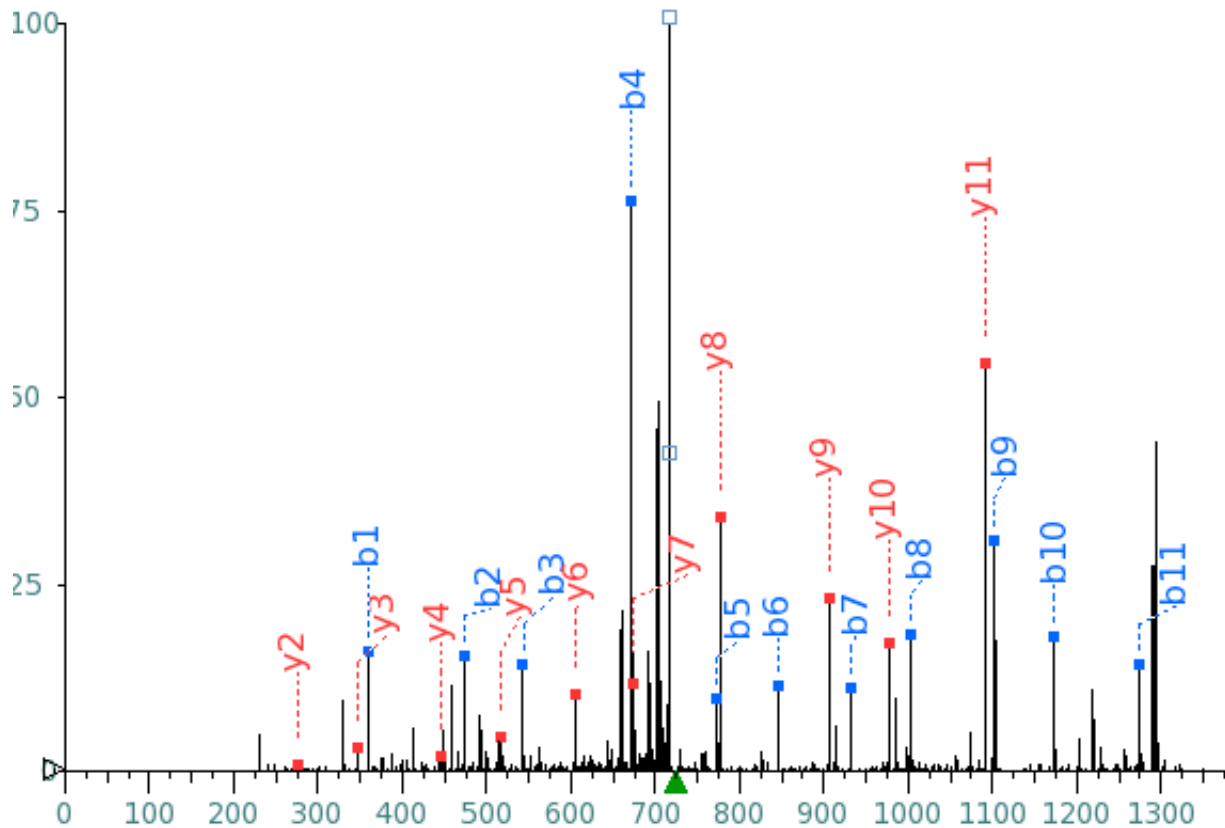

# QNAETASAVATR (+2)

Primary Reference: NCOA7\_HUMAN

Search ID: 75058

Search Name: 20141216\_QLhumanTMT6lowres\_Obj15720\_CETSA\_1203\_Set1\_Fraction\_01

Scan#: 9136

Observed Mass: 724.3898 (1.4 ppm)

PSM Score: 62.39

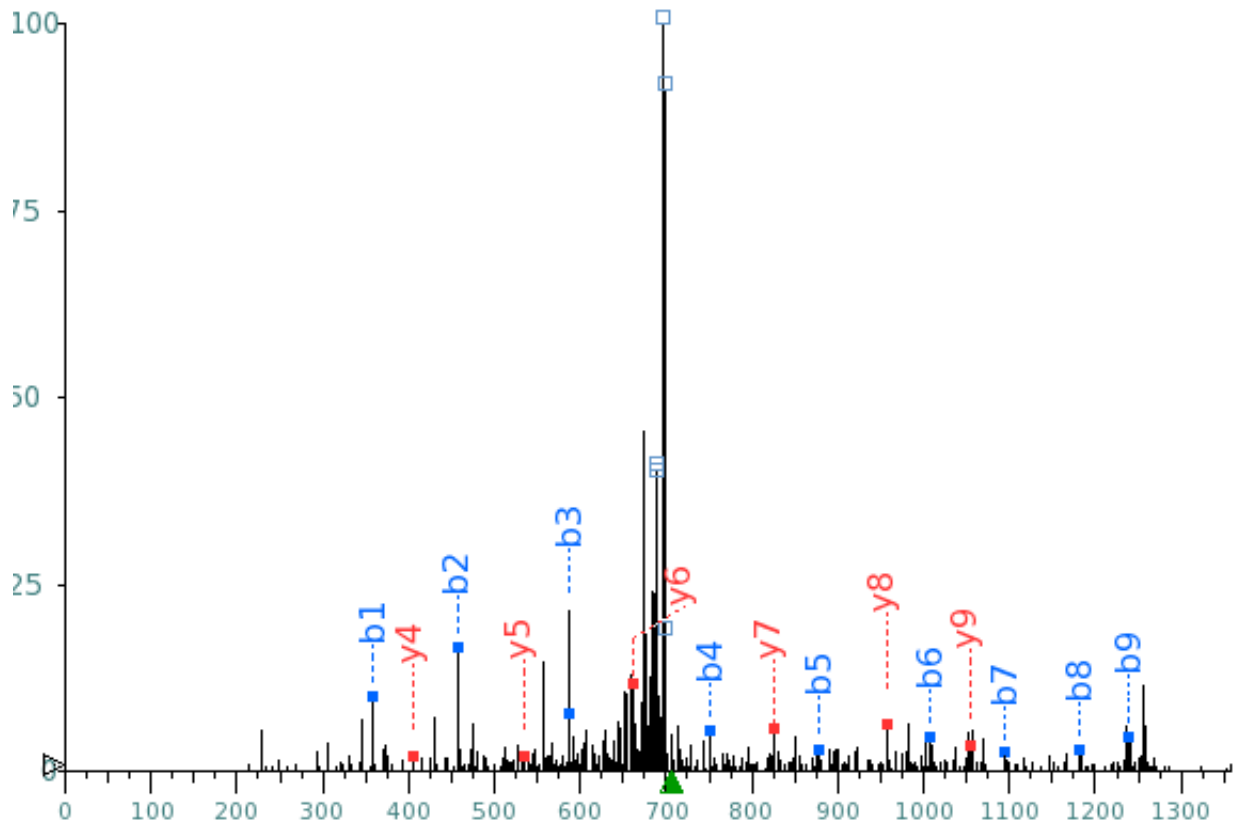

# QVMYQQSSGR (+2)

Primary Reference: EPDR1\_HUMAN

Search ID: 75058

Search Name: 20141216\_QLhumanTMT6lowres\_Obj15720\_CETSA\_1203\_Set1\_Fraction\_01

Scan#: 10171

Observed Mass: 706.8625 (1.6 ppm)

PSM Score: 12.05

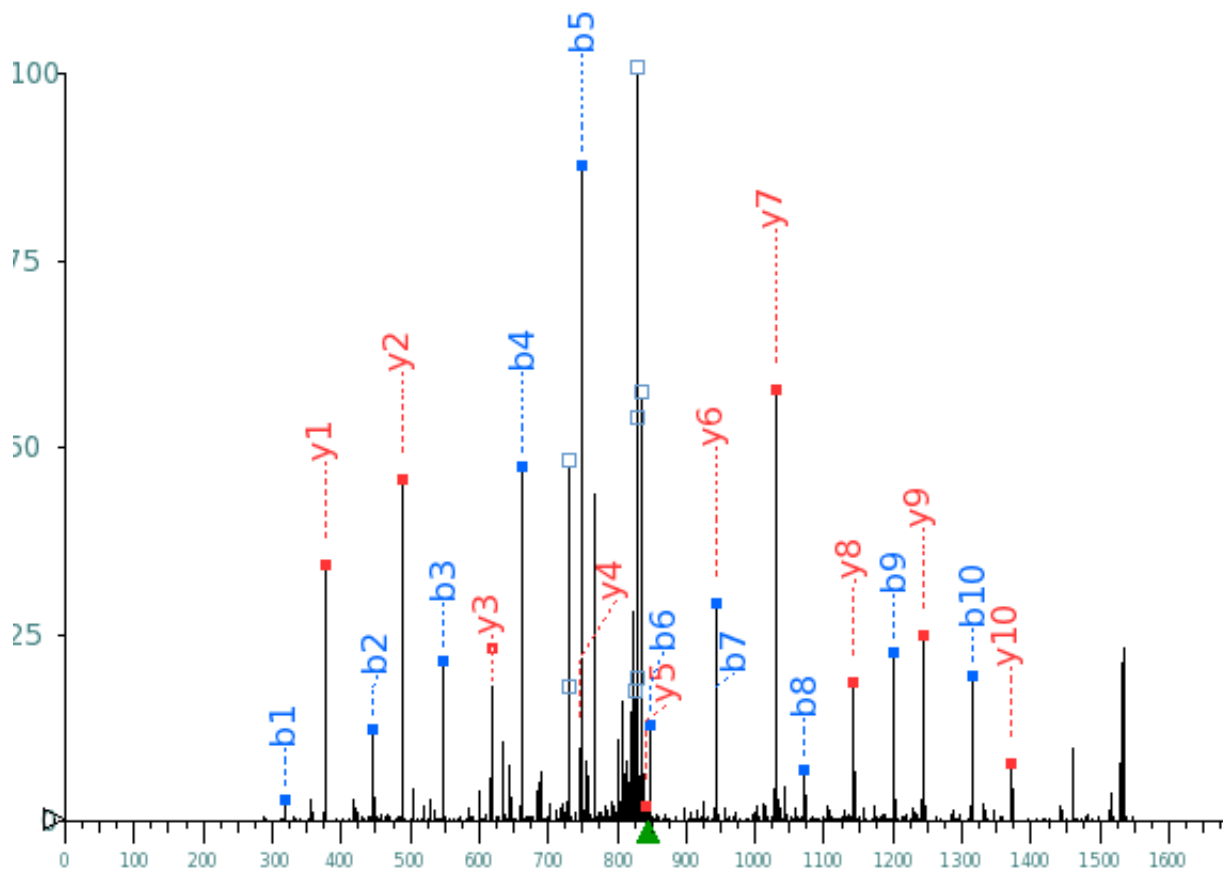

# SETISVPQEIK (+2)

Primary Reference: MOC2A\_HUMAN

Search ID: 75058

Search Name: 20141216\_QLhumanTMT6lowres\_Obj15720\_CETSA\_1203\_Set1\_Fraction\_01

Scan#: 22917

Observed Mass: 844.9967 (1.6 ppm)

PSM Score: 49.11



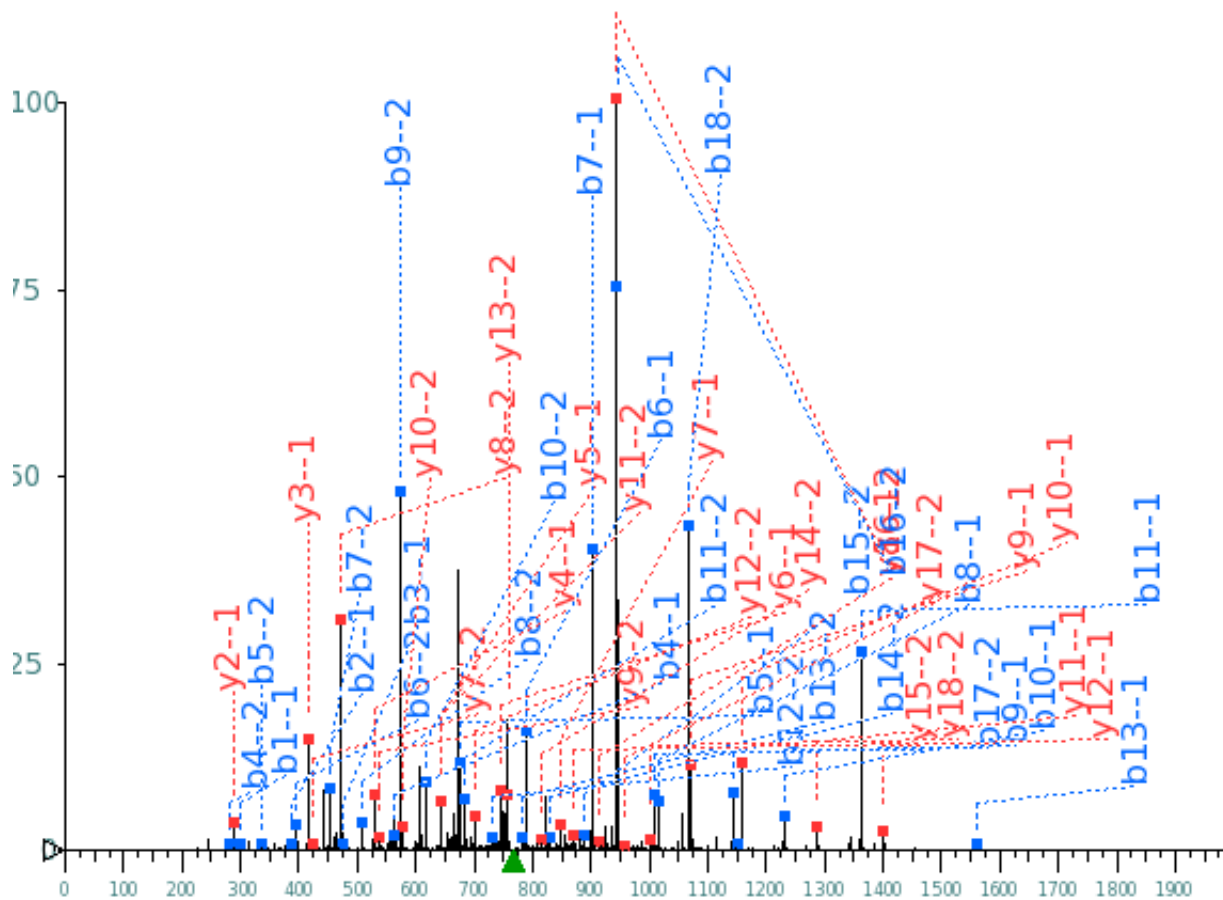

# ASSILINESEPTTIQIR (+3)

Primary Reference: Q53FE8\_HUMAN

Search ID: 75058

Search Name: 20141216\_QLhumanTMT6lowres\_Obj15720\_CETSA\_1203\_Set1\_Fraction\_01

Scan#: 27101

Observed Mass: 768.0874 (1.1 ppm)

PSM Score: 55.75

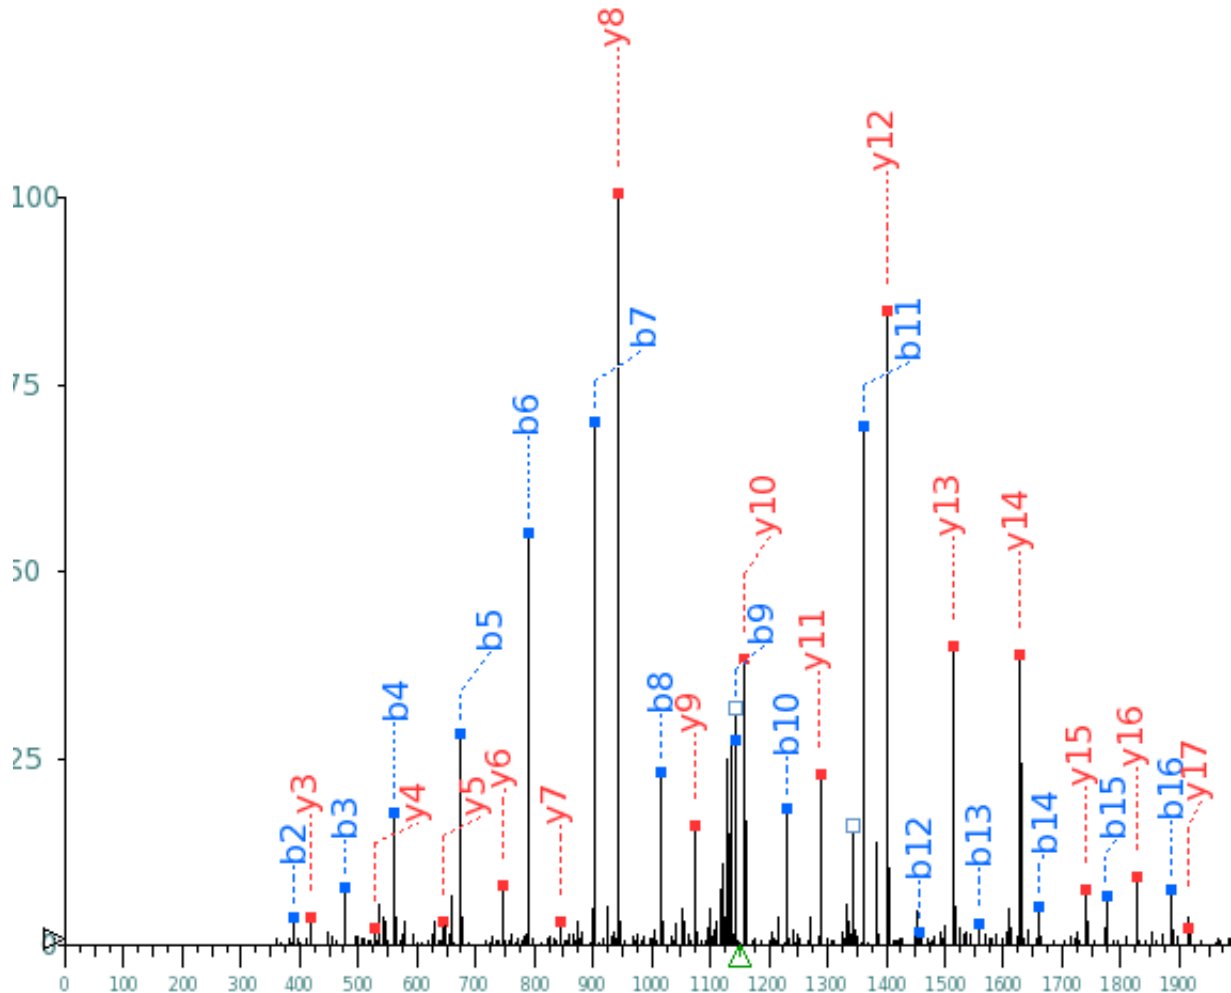

# ASSILINESEPTTNIQIR (+2)

Primary Reference: Q53FE8\_HUMAN

Search ID: 75058

Search Name: 20141216\_QLhumanTMT6lowres\_Obj15720\_CETSA\_1203\_Set1\_Fraction\_01

Scan#: 27123

Observed Mass: 1151.6273 (0.9 ppm)

PSM Score: 82

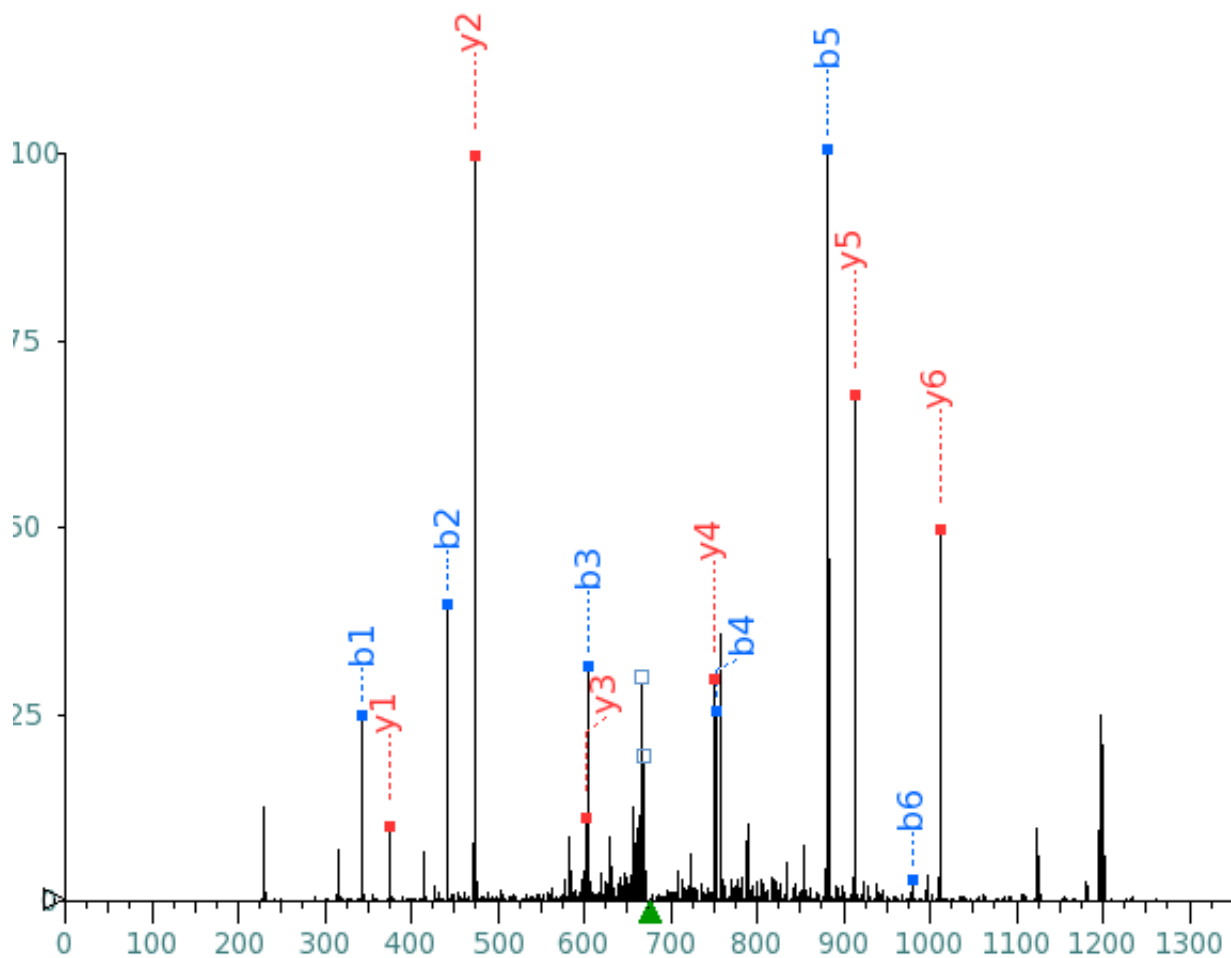

# LVIYFEPK (+2)

Primary Reference: PANK1\_HUMAN

Search ID: 75058

Search Name: 20141216\_QLhumanTMT6lowres\_Obj15720\_CETSA\_1203\_Set1\_Fraction\_01

Scan#: 27403

Observed Mass: 677.4125 (-0.4 ppm)

PSM Score: 21.71

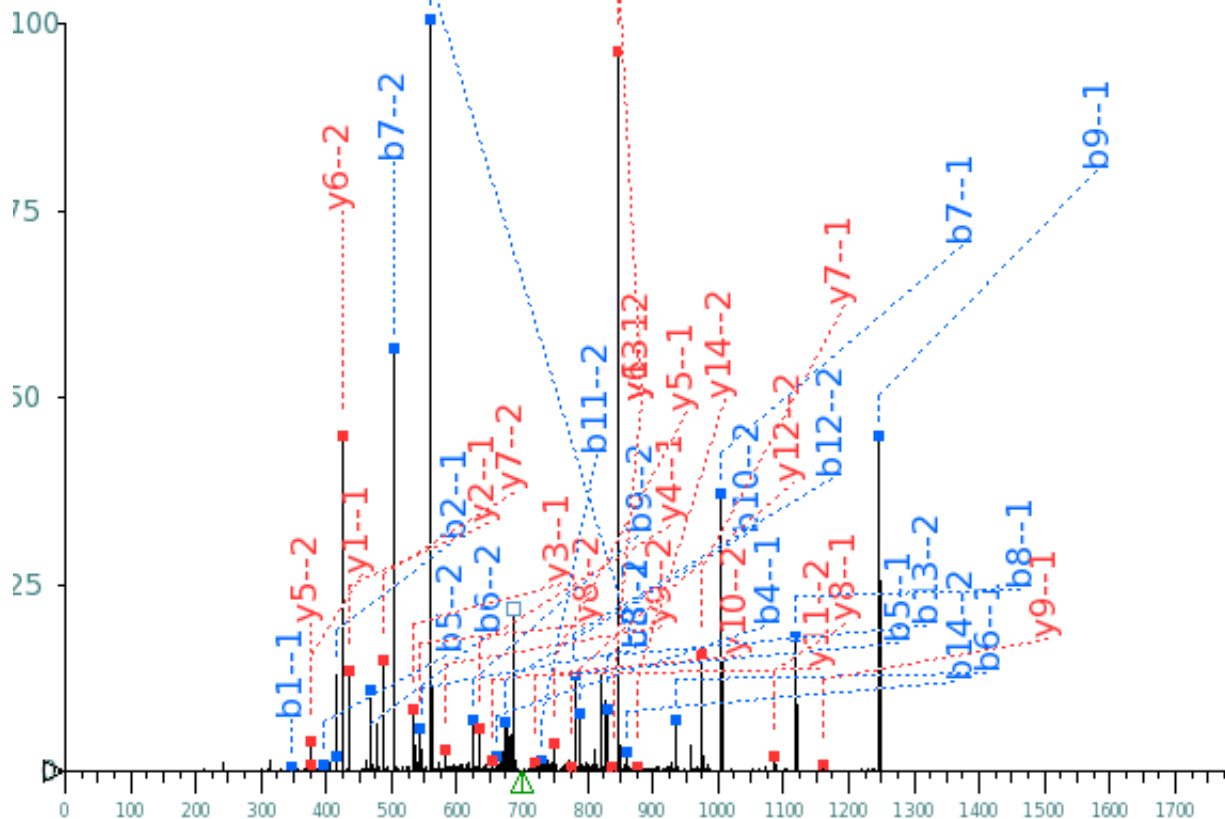

# DAELEFAIQPNTTGK (+3)

Primary Reference: E9PNV3\_HUMAN

Search ID: 75058

Search Name: 20141216\_QLhumanTMT6lowres\_Obj15720\_CETSA\_1203\_Set1\_Fraction\_01

Scan#: 28190

Observed Mass: 698.0494 (0.5 ppm)

PSM Score: 25.67

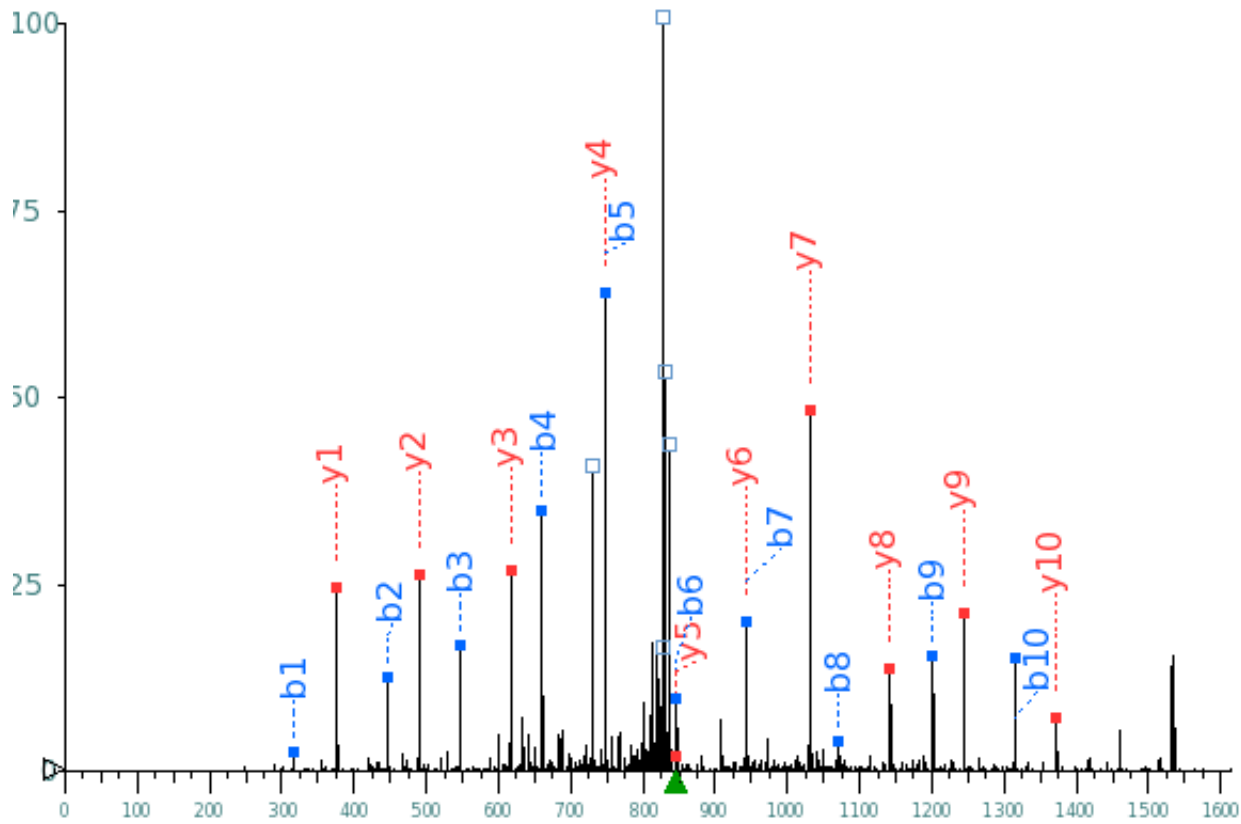

# SETISVPQEIK (+2)

Primary Reference: MOC2A\_HUMAN

Search ID: 75067

Search Name: 20141216\_QLhumanTMT6lowres\_Obj15720\_CETSA\_1203\_Set1\_Fraction\_02

Scan#: 22735

Observed Mass: 844.9964 (1.2 ppm)

PSM Score: 67.58

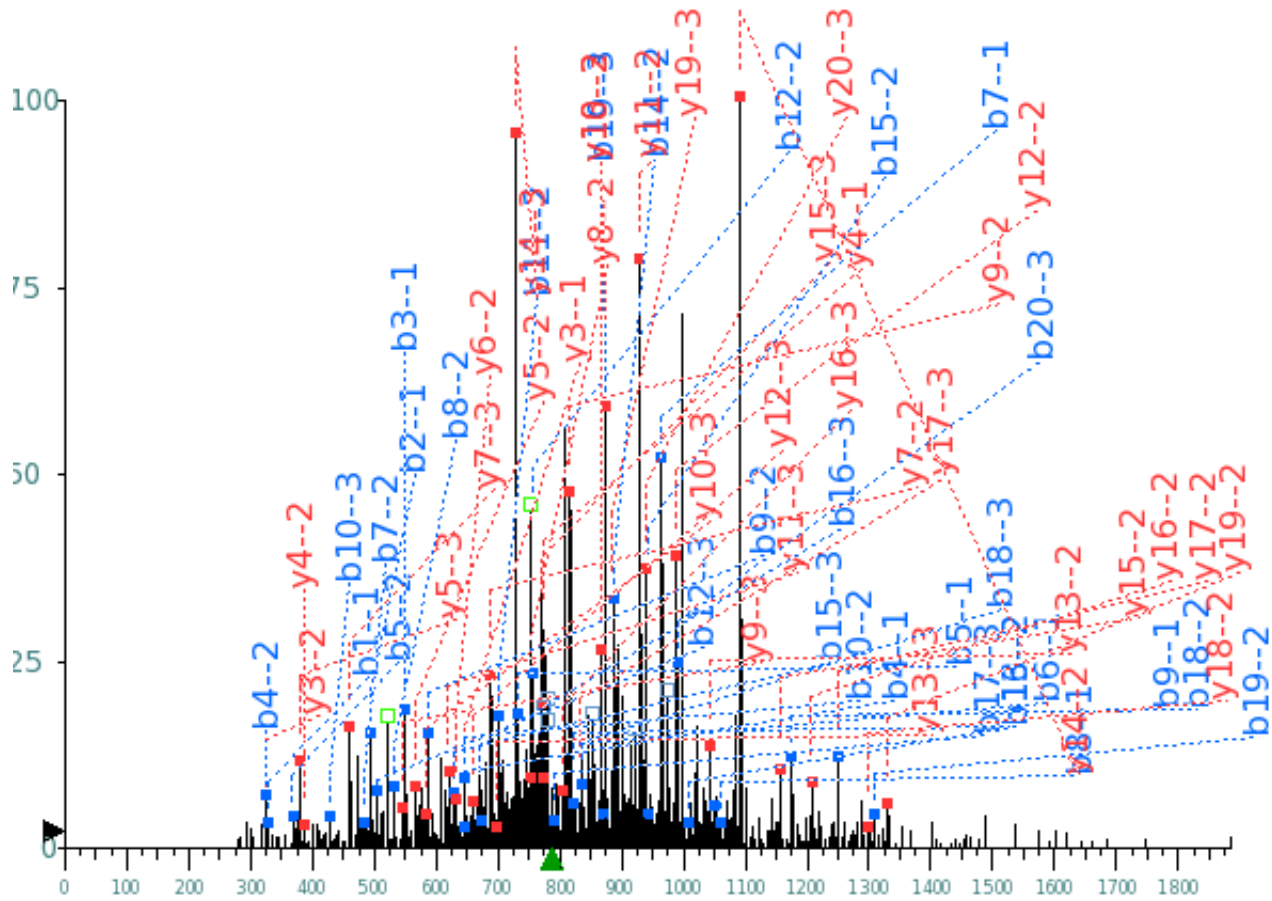

# VYGPSTPELLLEEKENKR (+4)

Primary Reference: N4BP1\_HUMAN

Search ID: 75067

Search Name: 20141216\_QLhumanTMT6lowres\_Obj15720\_CETSA\_1203\_Set1\_Fraction\_02

Scan#: 37891

Observed Mass: 786.9589 (0.5 ppm)

PSM Score: 36.13

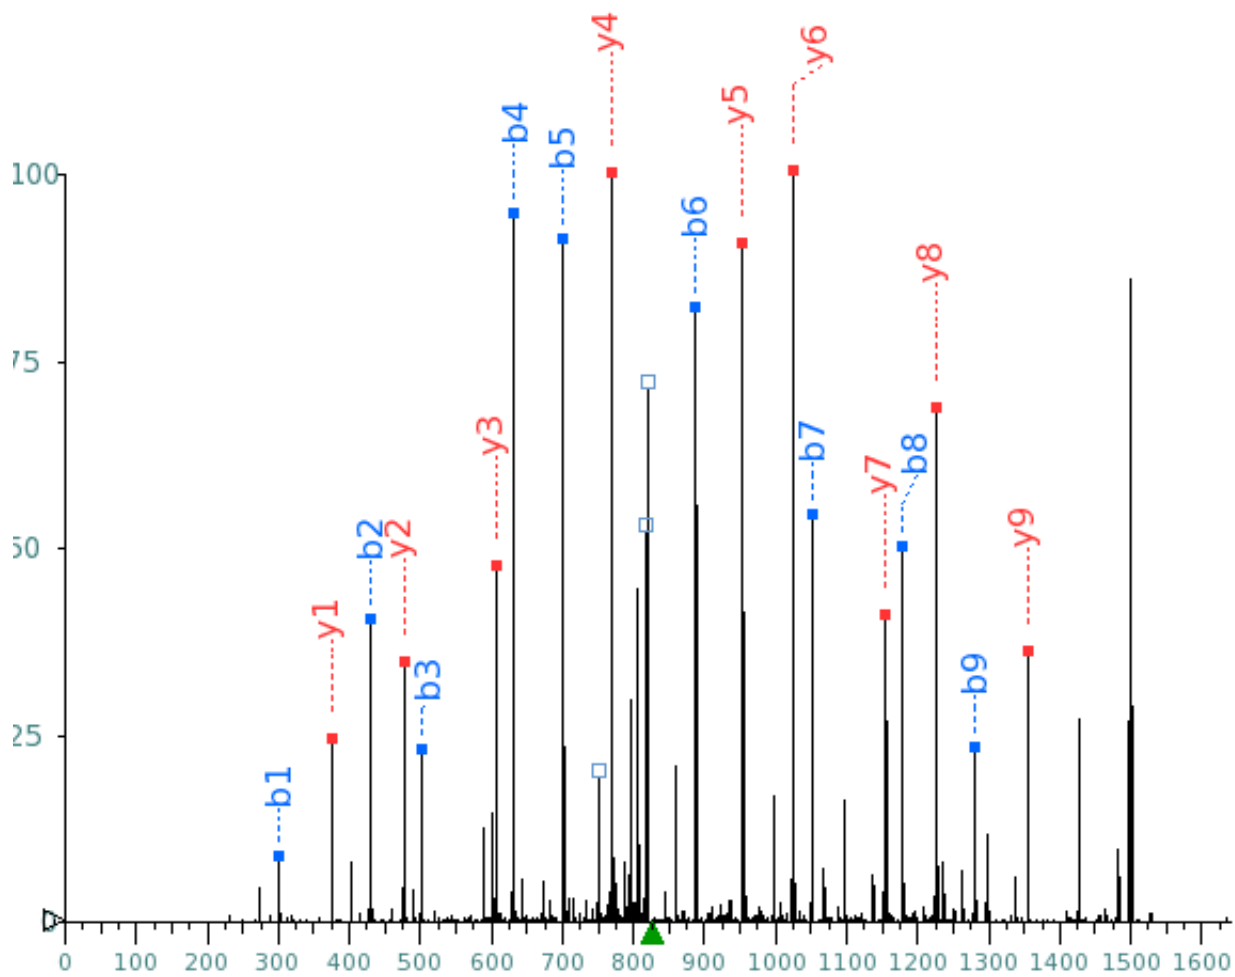

# AEAEAWYQTK (+2)

Primary Reference: K2C79\_HUMAN

Search ID: 75070

Search Name: 20141216\_QLhumanTMT6lowres\_Obj15720\_CETSA\_1203\_Set1\_Fraction\_03

Scan#: 21254

Observed Mass: 827.9473 (2 ppm)

PSM Score: 58.63

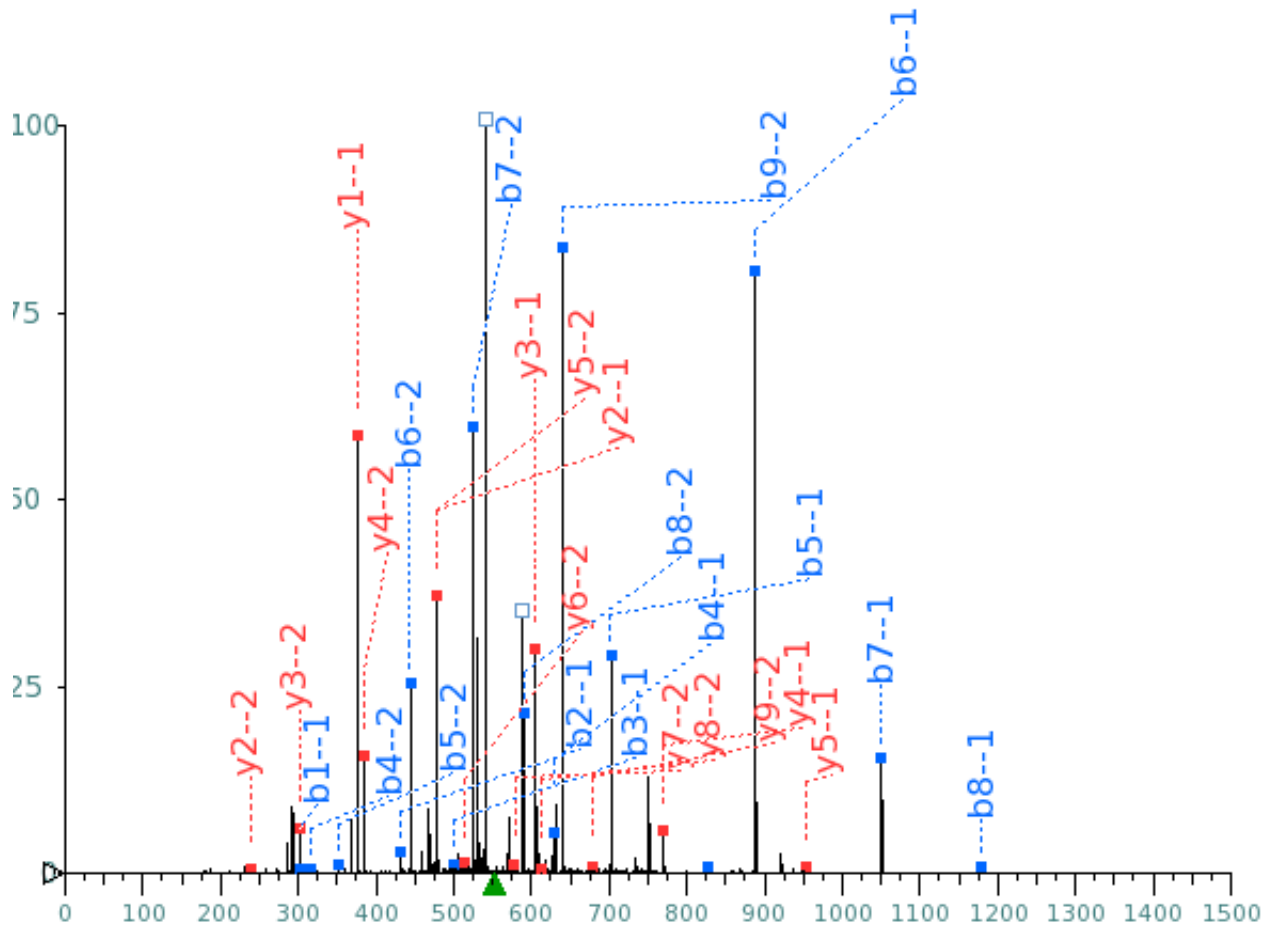

# AEAEAWYQTK (+3)

Primary Reference: K2C79\_HUMAN

Search ID: 75070

Search Name: 20141216\_QLhumanTMT6lowres\_Obj15720\_CETSA\_1203\_Set1\_Fraction\_03

Scan#: 21258

Observed Mass: 552.3008 (2.3 ppm)

PSM Score: 15.21



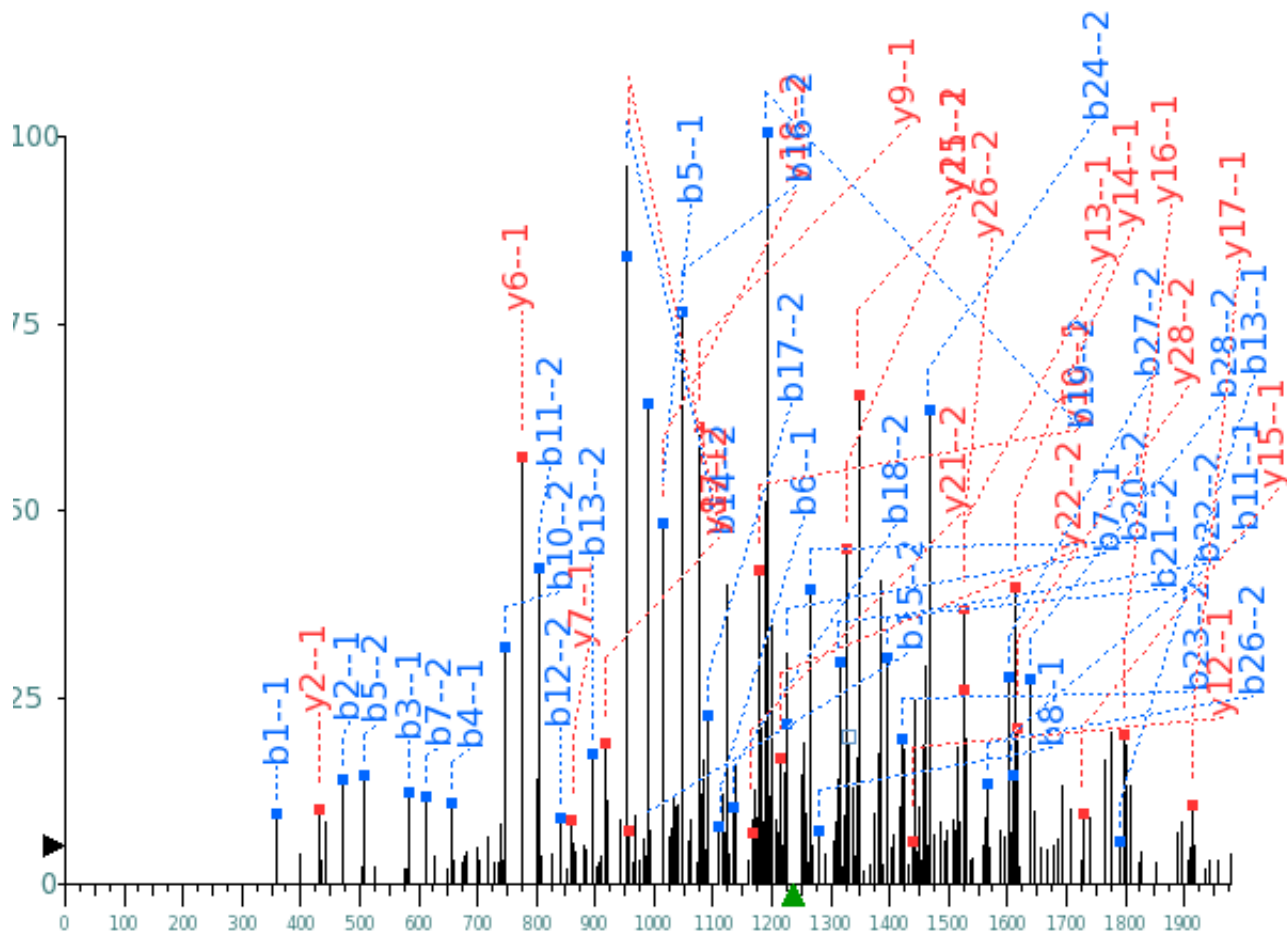

# ELLAKPIGPDDAIDALSSDFTCGSPTAAGK (+3)

Primary Reference: B2RCJ7\_HUMAN

Search ID: 75070

Search Name: 20141216\_QLhumanTMT6lowres\_Obj15720\_CETSA\_1203\_Set1\_Fraction\_03

Scan#: 38758

Observed Mass: 1235.6599 (-0.2 ppm)

PSM Score: 99.64

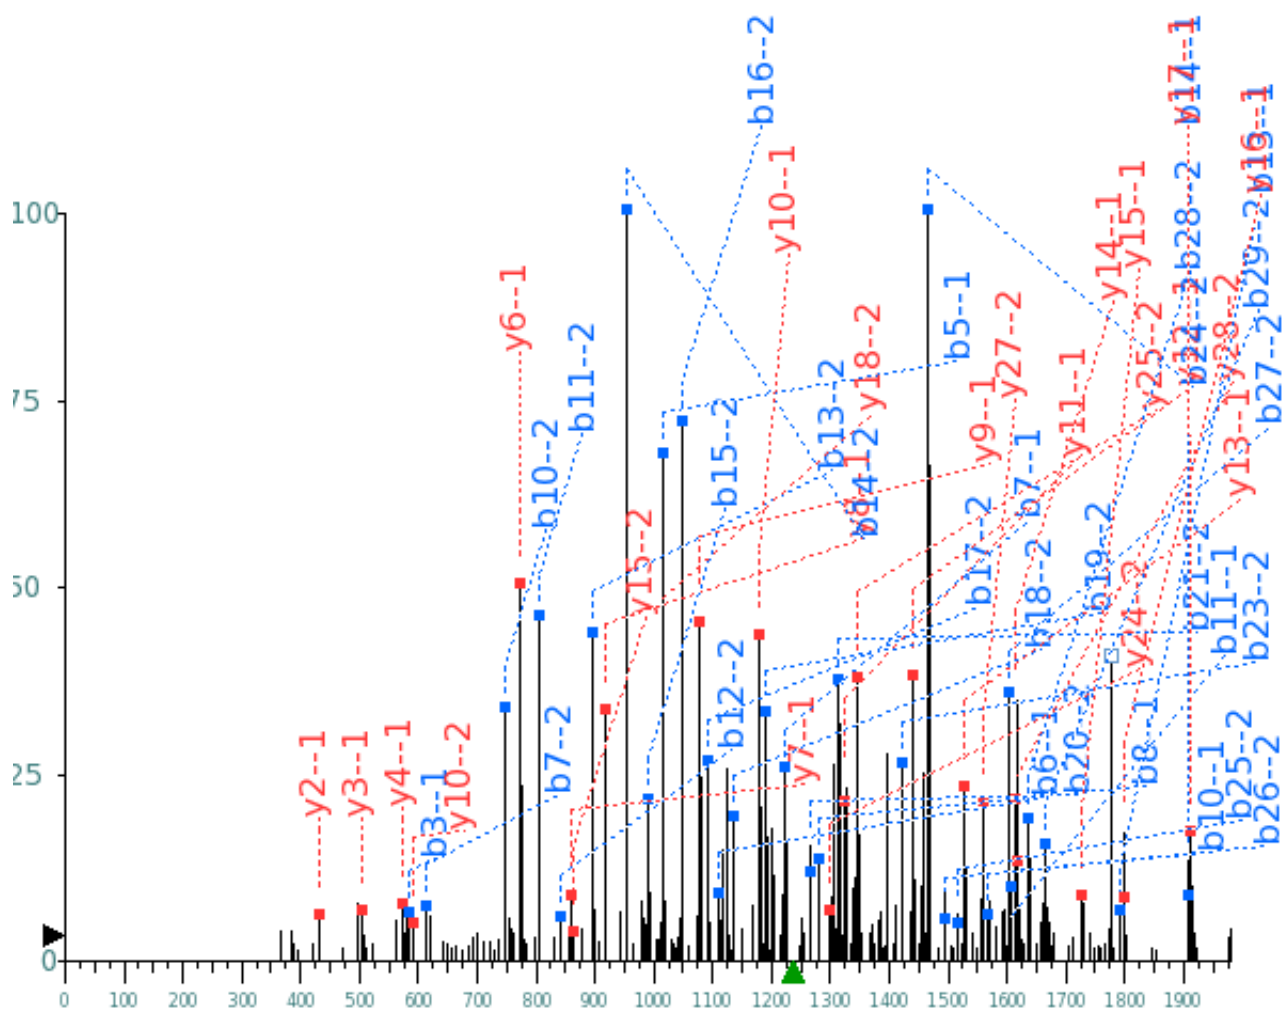

# ELLAKPIGPDDAIDALSSDFTCGSPTAAGK (+3)

Primary Reference: B2RCJ7\_HUMAN

Search ID: 75070

Search Name: 20141216\_QLhumanTMT6lowres\_Obj15720\_CETSA\_1203\_Set1\_Fraction\_03

Scan#: 38778

Observed Mass: 1235.6596 (-0.4 ppm)

PSM Score: 92.08

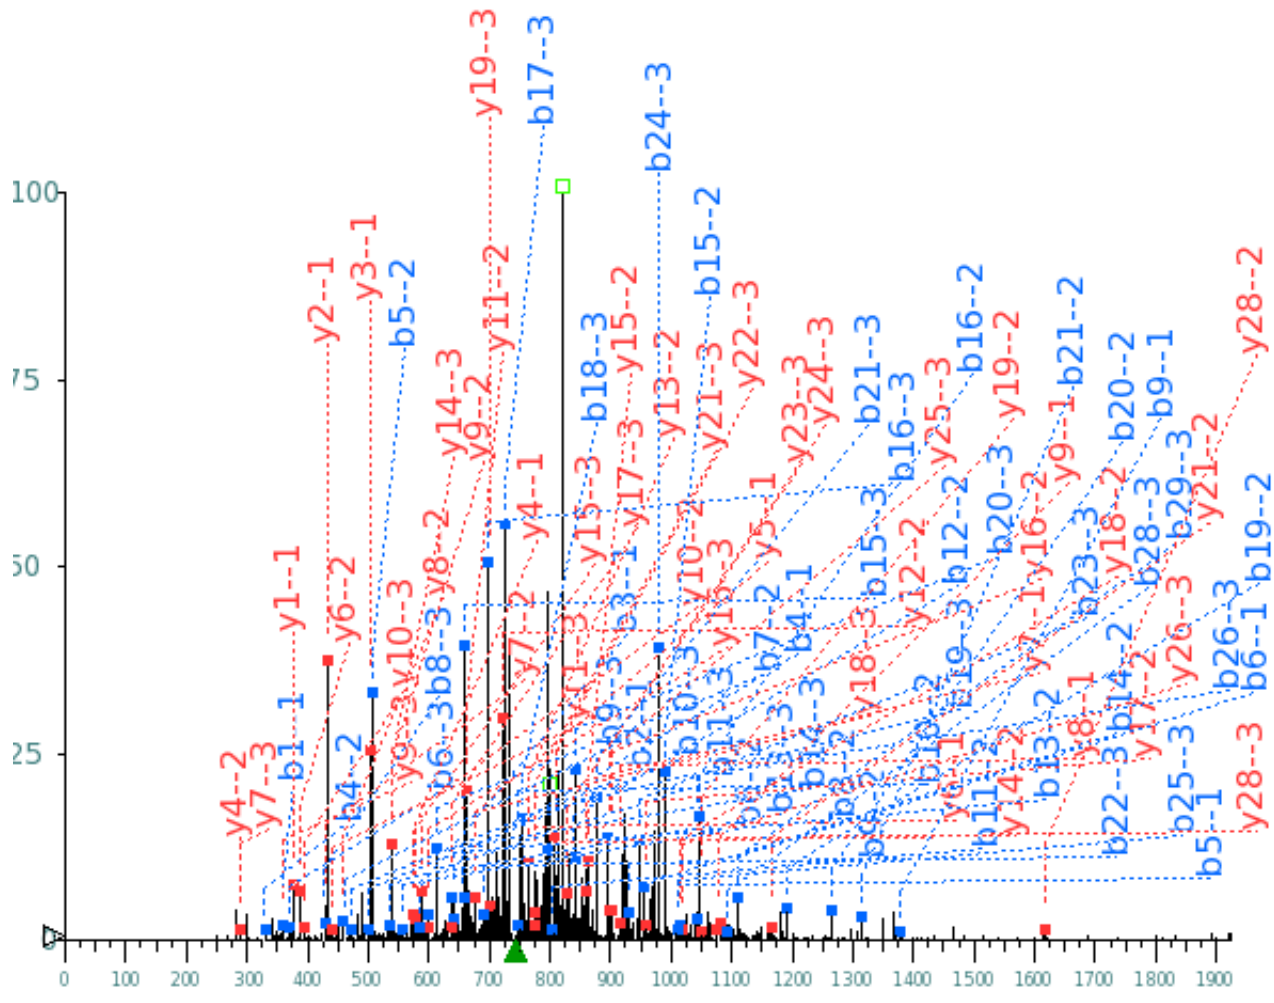

# ELLAKPIGPDDAIDALSSDFTCGSPTAAGK (+5)

Primary Reference: B2RCJ7\_HUMAN

Search ID: 75070

Search Name: 20141216\_QLhumanTMT6lowres\_Obj15720\_CETSA\_1203\_Set1\_Fraction\_03

Scan#: 38905

Observed Mass: 741.7993 (0.4 ppm)

PSM Score: 18.95

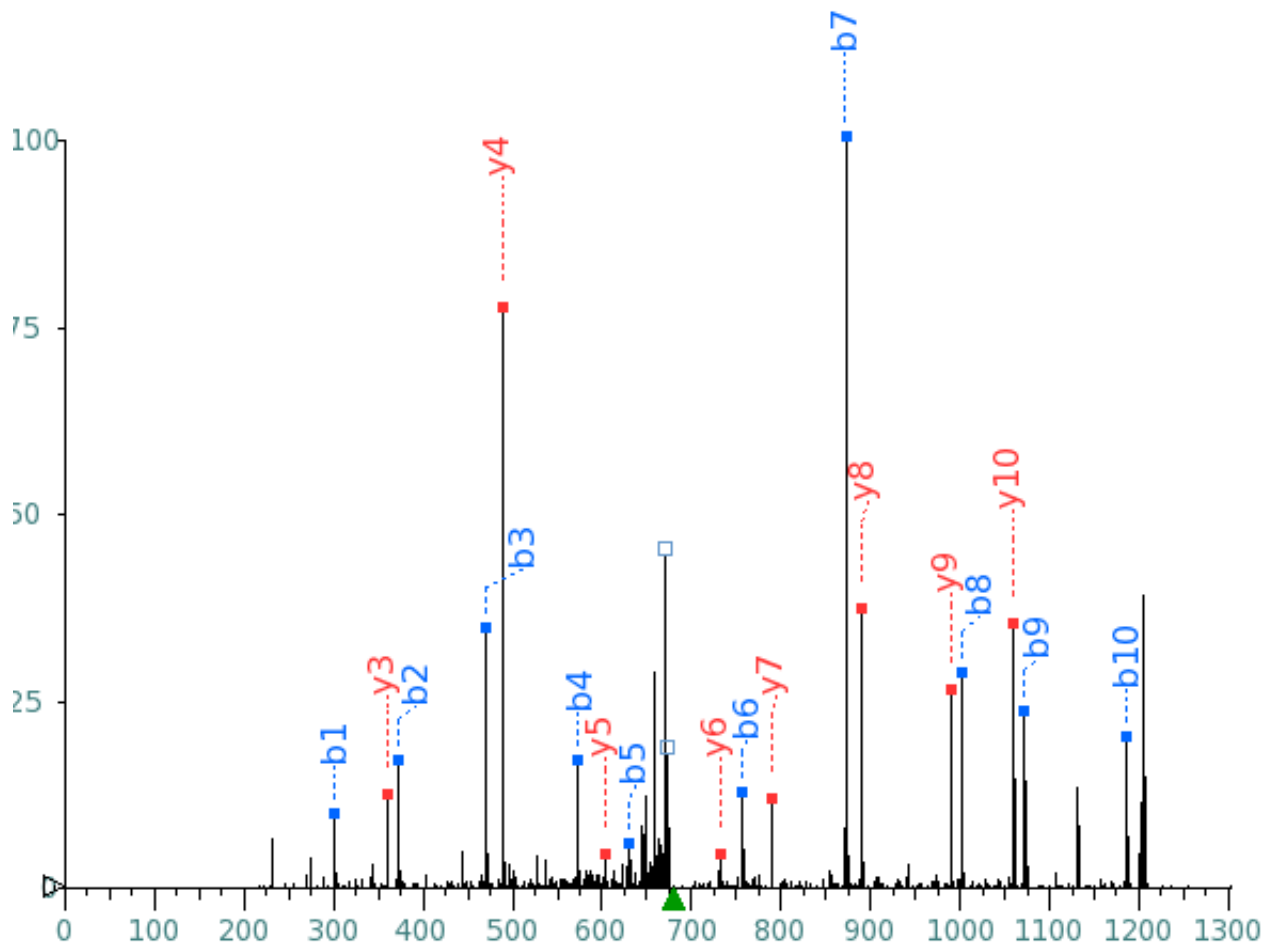

# AAVTGQDEAIR (+2)

Primary Reference: ANR16\_HUMAN

Search ID: 75072

Search Name: 20141216\_QLhumanTMT6lowres\_Obj15720\_CETSA\_1203\_Set1\_Fraction\_04

Scan#: 11904

Observed Mass: 680.3751 (-0.1 ppm)

PSM Score: 56.89

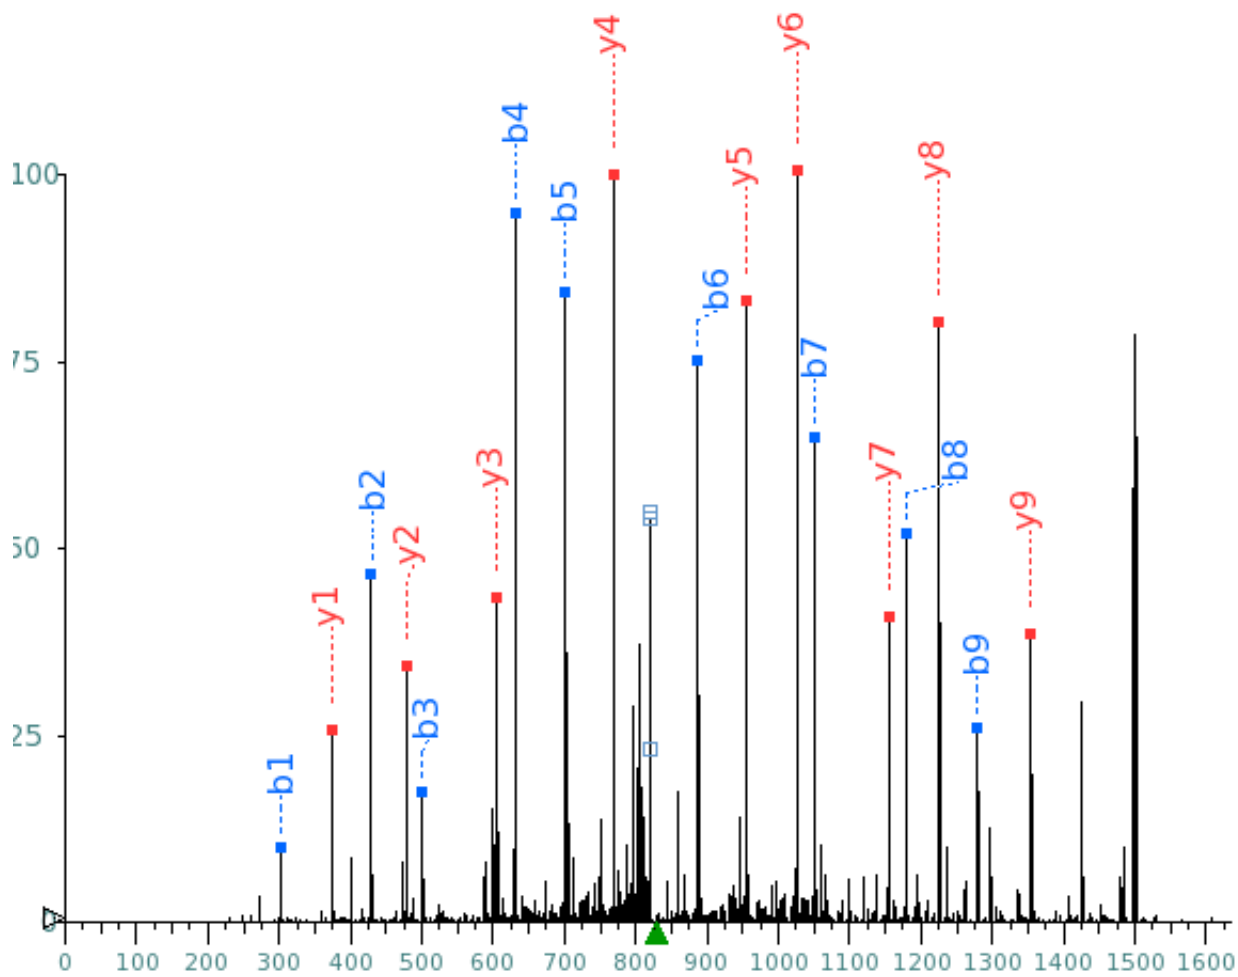

# AEAEAWYQTK (+2)

Primary Reference: K2C79\_HUMAN

Search ID: 75072

Search Name: 20141216\_QLhumanTMT6lowres\_Obj15720\_CETSA\_1203\_Set1\_Fraction\_04

Scan#: 21286

Observed Mass: 827.9456 (-0 ppm)

PSM Score: 60.3

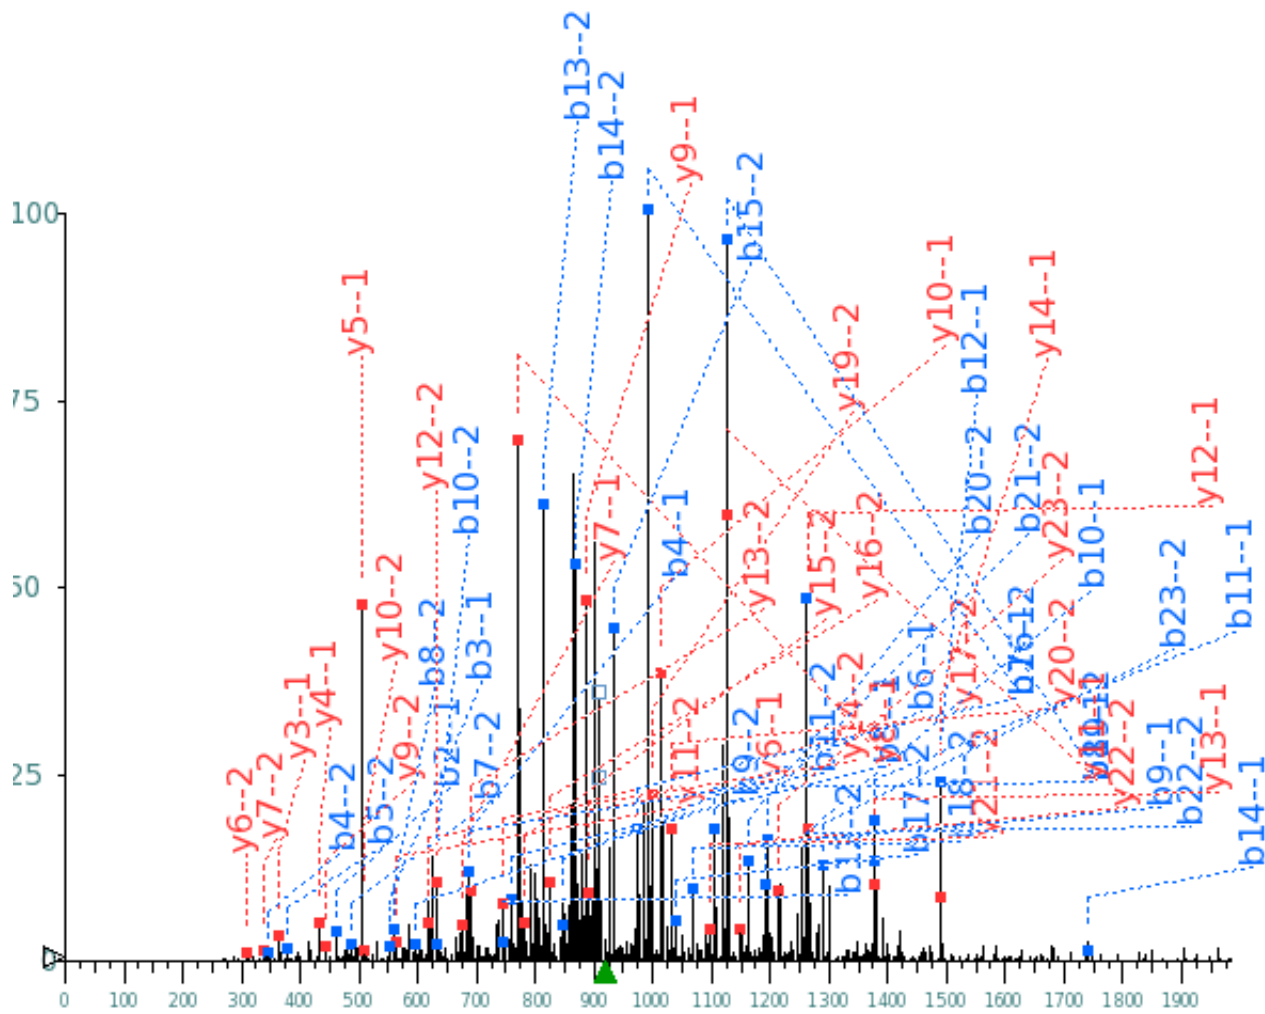

# TQVEASEESALNHLQNP GDAAEGR (+3)

Primary Reference: MOFA1\_HUMAN

Search ID: 75072

Search Name: 20141216\_QLhumanTMT6lowres\_Obj15720\_CETSA\_1203\_Set1\_Fraction\_04

Scan#: 22417

Observed Mass: 918.116 (-0 ppm)

PSM Score: 62.8

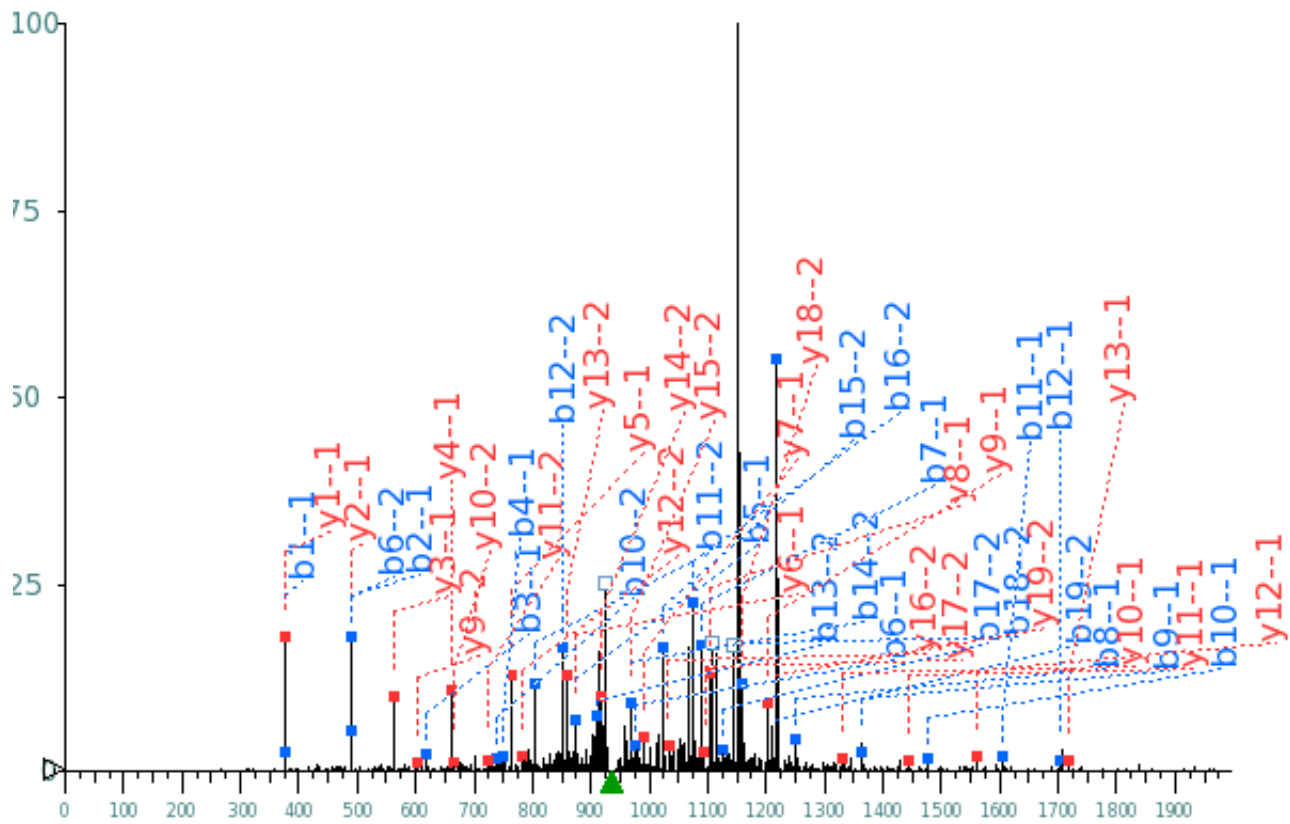

# FLEQQTLCNNQVNDLTTALK (+3)

Primary Reference: T4AF1\_HUMAN

Search ID: 75072

Search Name: 20141216\_QLhumanTMT6lowres\_Obj15720\_CETSA\_1203\_Set1\_Fraction\_04

Scan#: 34753

Observed Mass: 936.8363 (-0.8 ppm)

PSM Score: 44.56

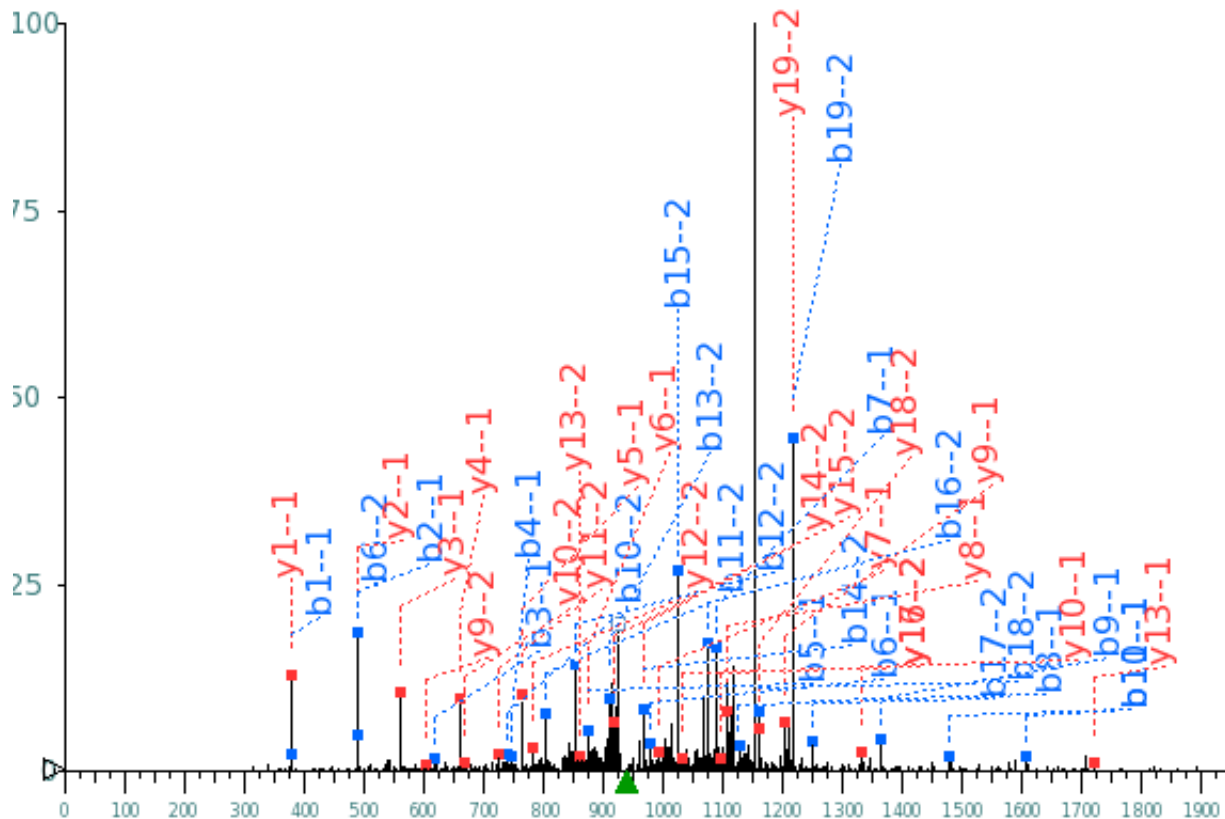

# FLEQQTLCNNQVNDLTTALK (+3)

Primary Reference: T4AF1\_HUMAN

Search ID: 75072

Search Name: 20141216\_QLhumanTMT6lowres\_Obj15720\_CETSA\_1203\_Set1\_Fraction\_04

Scan#: 34783

Observed Mass: 936.8364 (-0.7 ppm)

PSM Score: 61.9



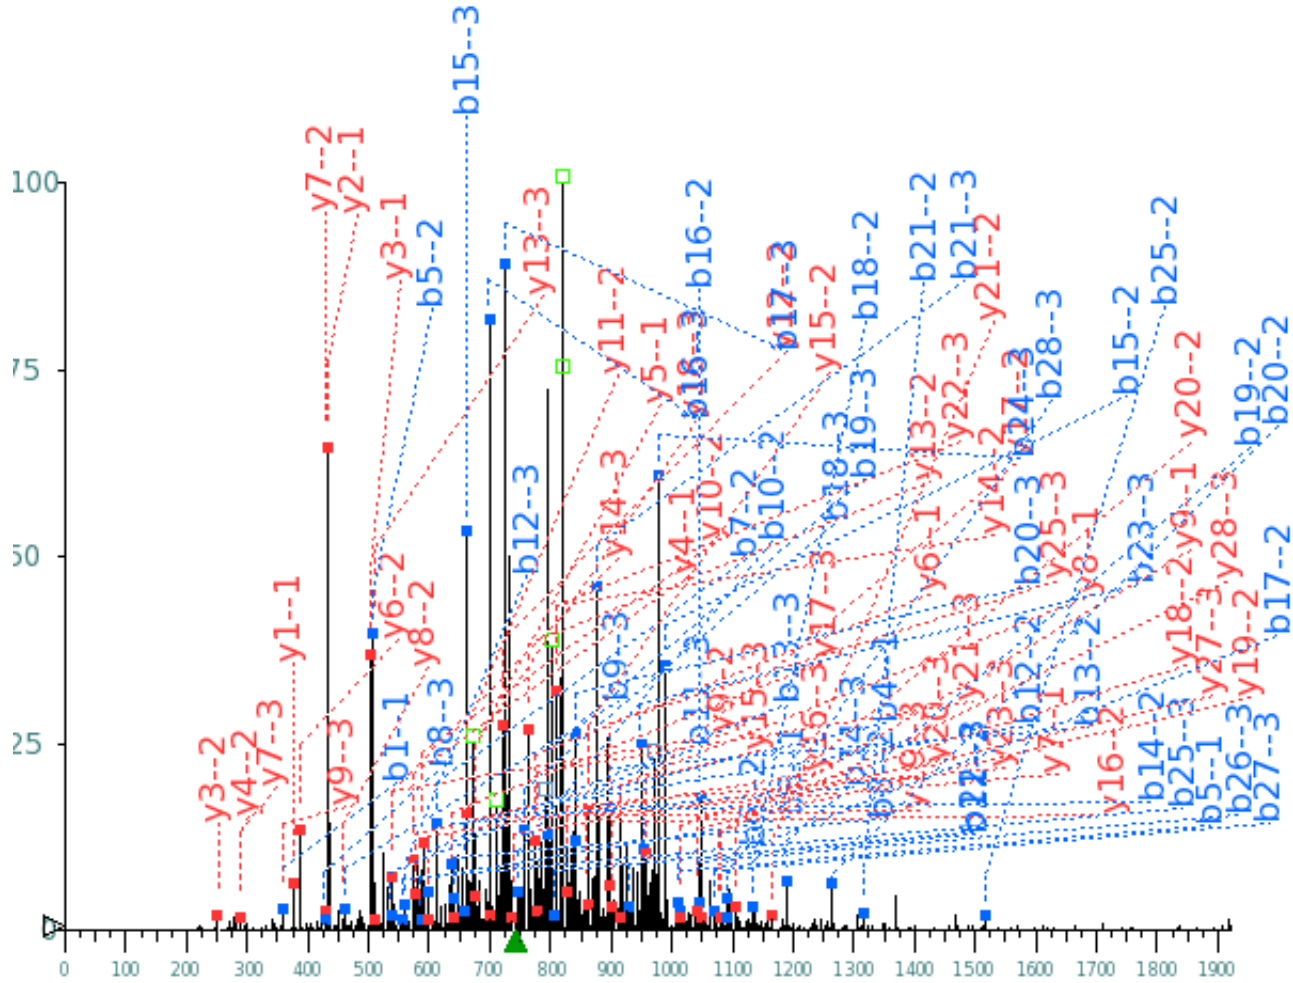

# ELLAKPIGPDDAIDALSSDFTCGSPTAAGK (+5)

Primary Reference: B2RCJ7\_HUMAN

Search ID: 75072

Search Name: 20141216\_QLhumanTMT6lowres\_Obj15720\_CETSA\_1203\_Set1\_Fraction\_04

Scan#: 38622

Observed Mass: 741.7988 (-0.2 ppm)

PSM Score: 22.37

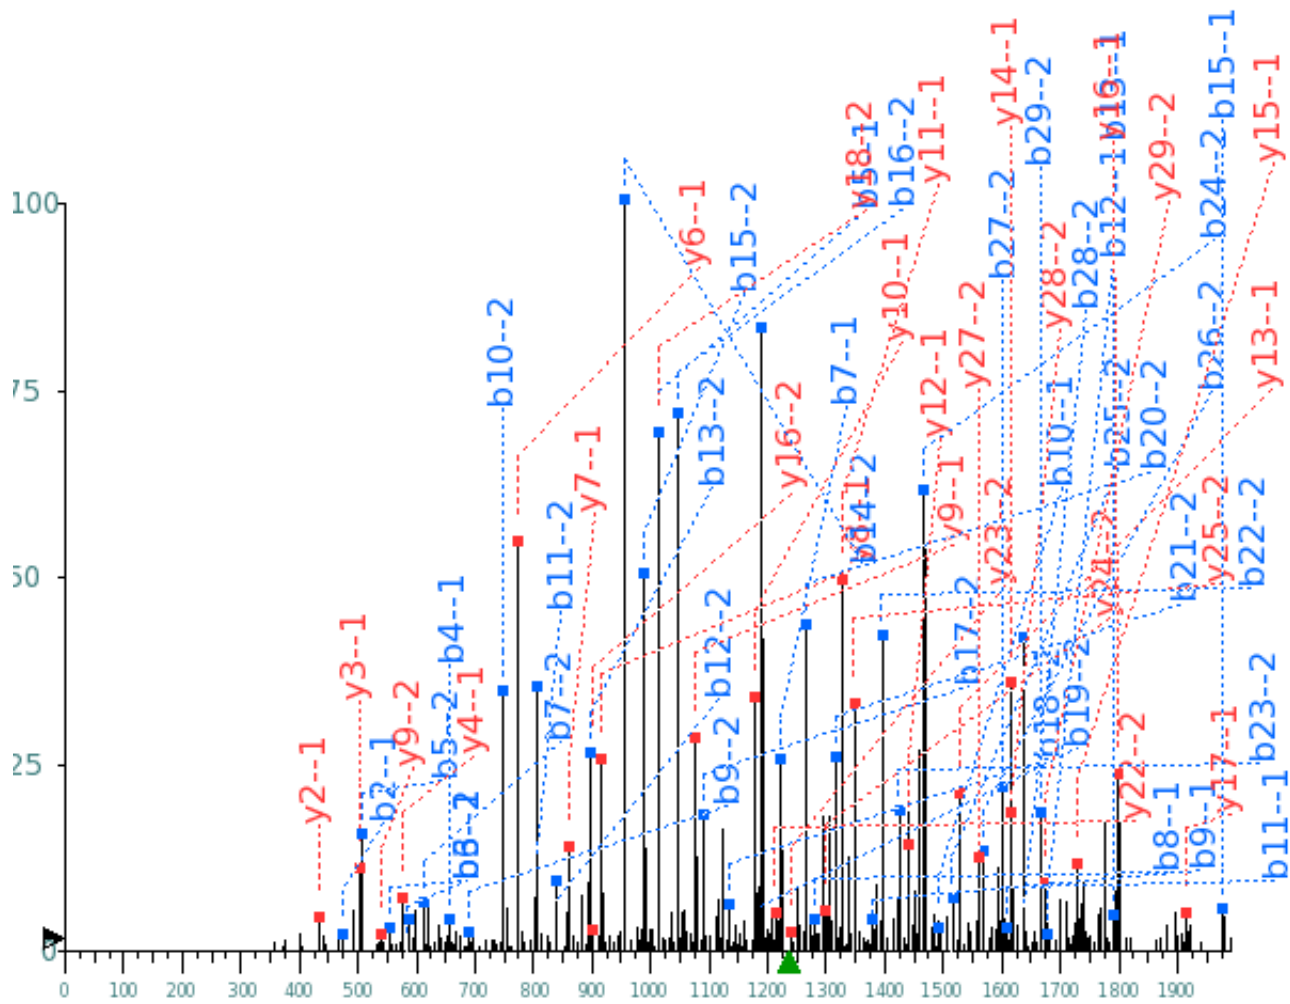

# ELLAKPIGPDDAIDALSSDFTCGSPTAAGK (+3)

Primary Reference: B2RCJ7\_HUMAN

Search ID: 75072

Search Name: 20141216\_QLhumanTMT6lowres\_Obj15720\_CETSA\_1203\_Set1\_Fraction\_04

Scan#: 38649

Observed Mass: 1235.6594 (-0.6 ppm)

PSM Score: 102.5

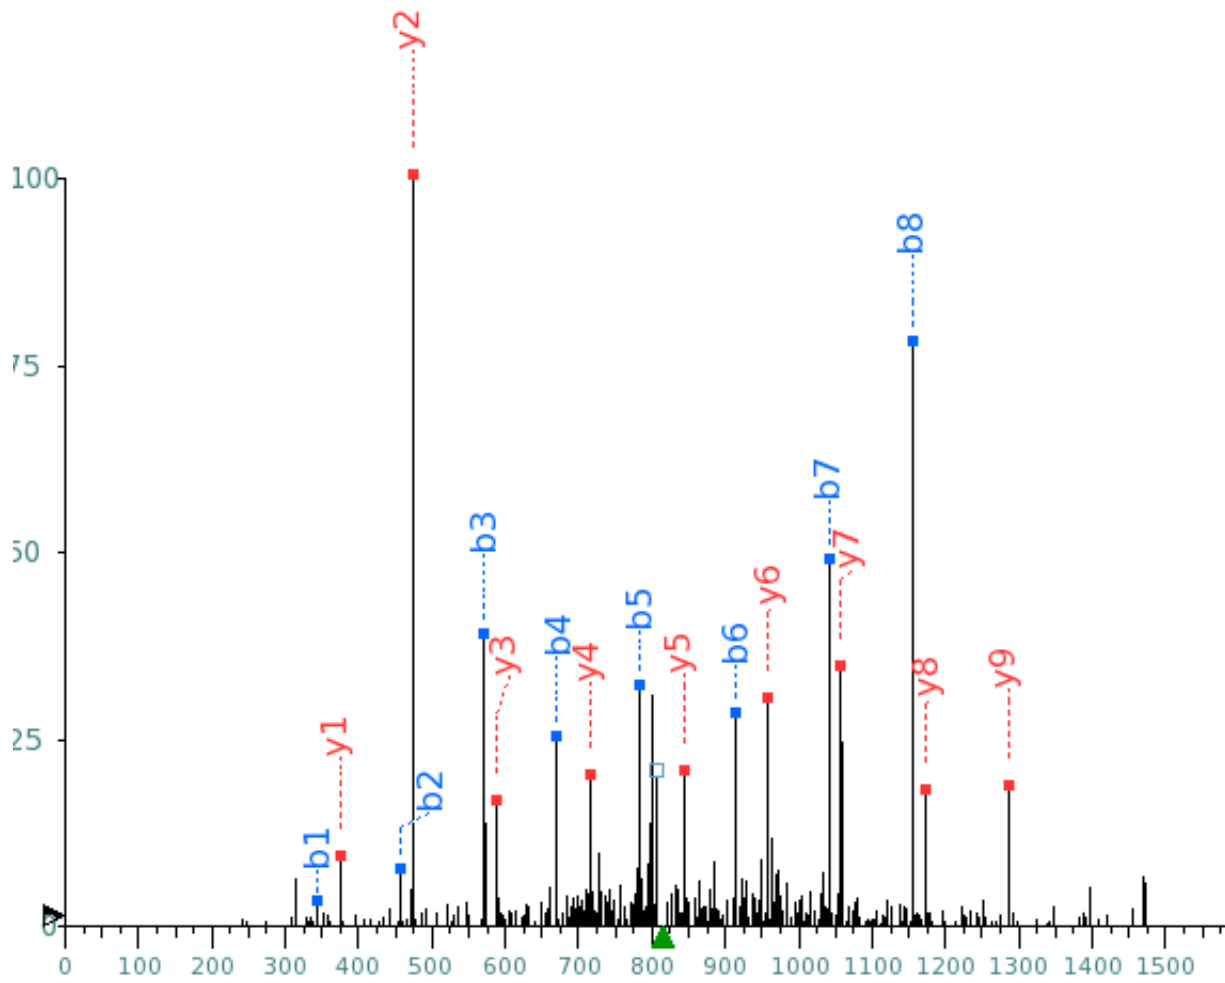

# ILDVLEEIPK (+2)

Primary Reference: NDUA5\_HUMAN

Search ID: 75072

Search Name: 20141216\_QLhumanTMT6lowres\_Obj15720\_CETSA\_1203\_Set1\_Fraction\_04

Scan#: 40624

Observed Mass: 814.0078 (0 ppm)

PSM Score: 46.58

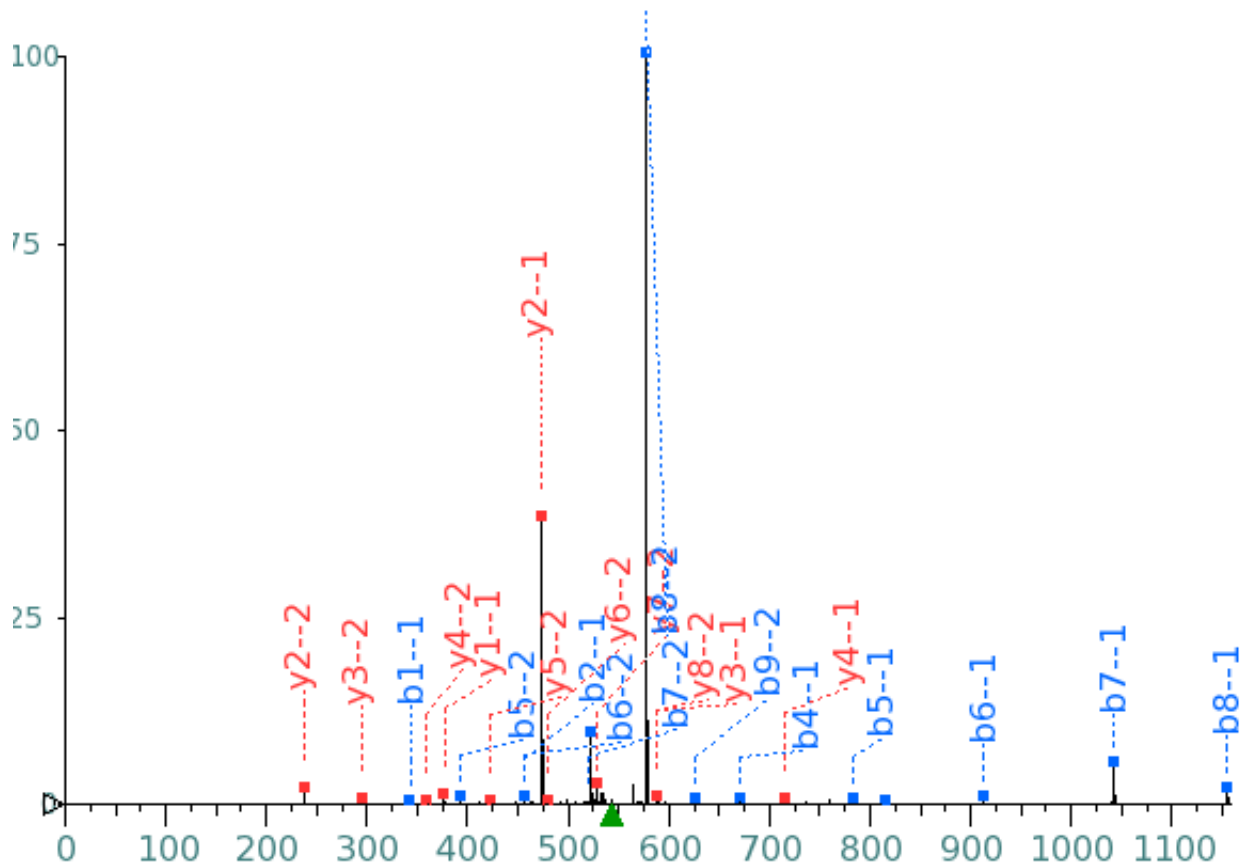

# ILDVLEEIPK (+3)

Primary Reference: NDUA5\_HUMAN

Search ID: 75072

Search Name: 20141216\_QLhumanTMT6lowres\_Obj15720\_CETSA\_1203\_Set1\_Fraction\_04

Scan#: 40625

Observed Mass: 543.0078 (0.3 ppm)

PSM Score: 27.14

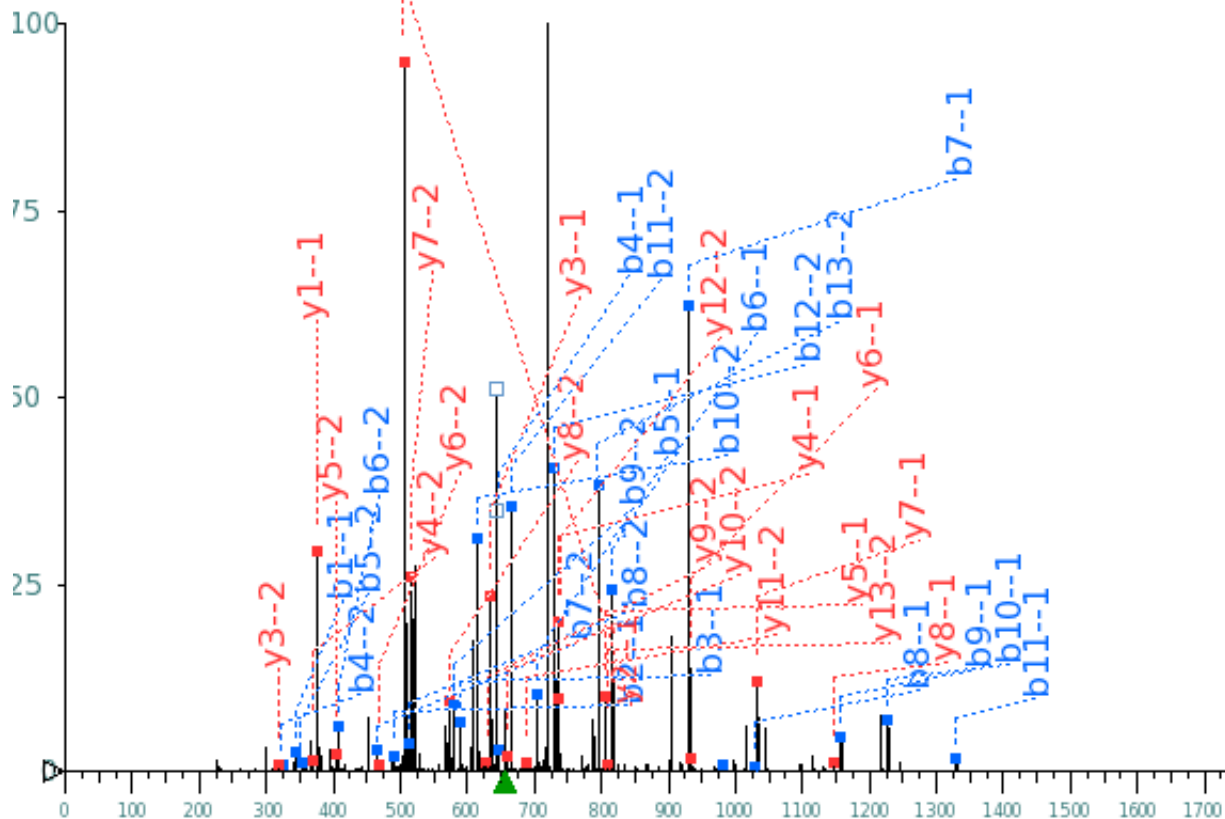

# IFVGGLNPEATEEK (+3)

Primary Reference: B4DMY3\_HUMAN

Search ID: 75073

Search Name: 20141216\_QLhumanTMT6lowres\_Obj15720\_CETSA\_1203\_Set1\_Fraction\_05

Scan#: 28645

Observed Mass: 654.7031 (0 ppm)

PSM Score: 23.77

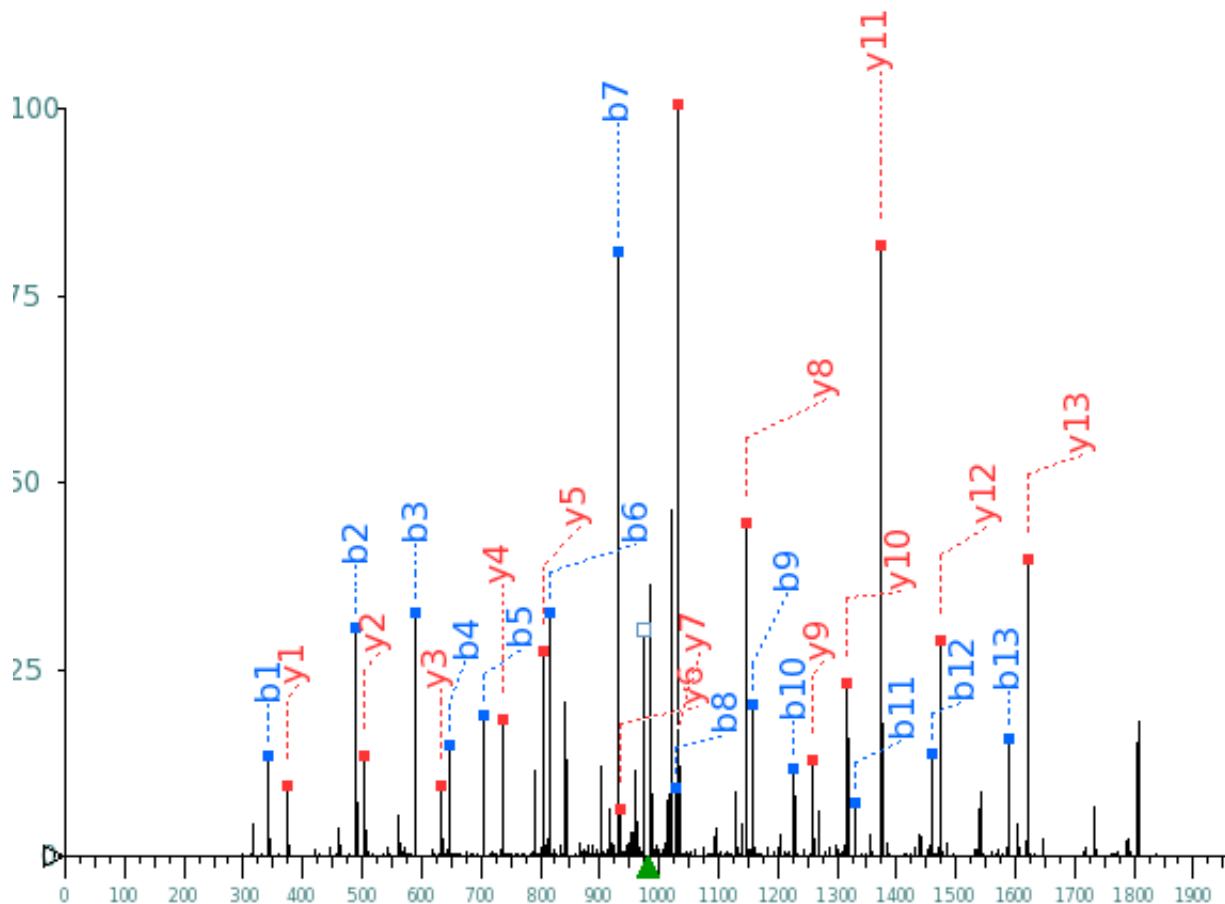

# IFVGGLNPEATEEK (+2)

Primary Reference: B4DMY3\_HUMAN

Search ID: 75073

Search Name: 20141216\_QLhumanTMT6lowres\_Obj15720\_CETSA\_1203\_Set1\_Fraction\_05

Scan#: 28699

Observed Mass: 981.5502 (-0.9 ppm)

PSM Score: 60.6

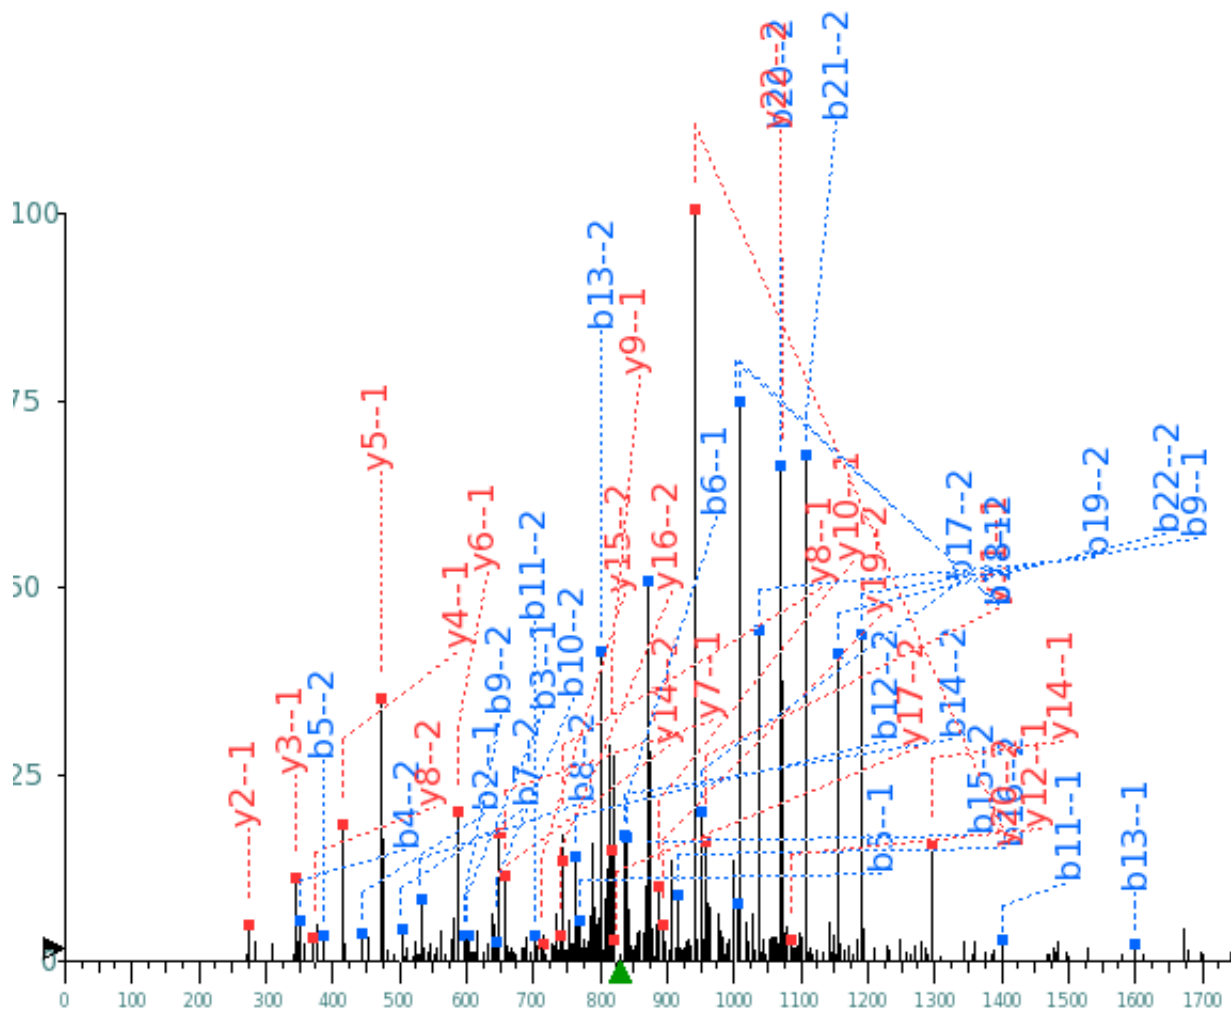

# LVCPAAYGEPLQAAASALGAAVR (+3)

Primary Reference: F8I2\_HUMAN

Search ID: 75073

Search Name: 20141216\_QLhumanTMT6lowres\_Obj15720\_CETSA\_1203\_Set1\_Fraction\_05

Scan#: 41964

Observed Mass: 829.1194 (0.1 ppm)

PSM Score: 68.53

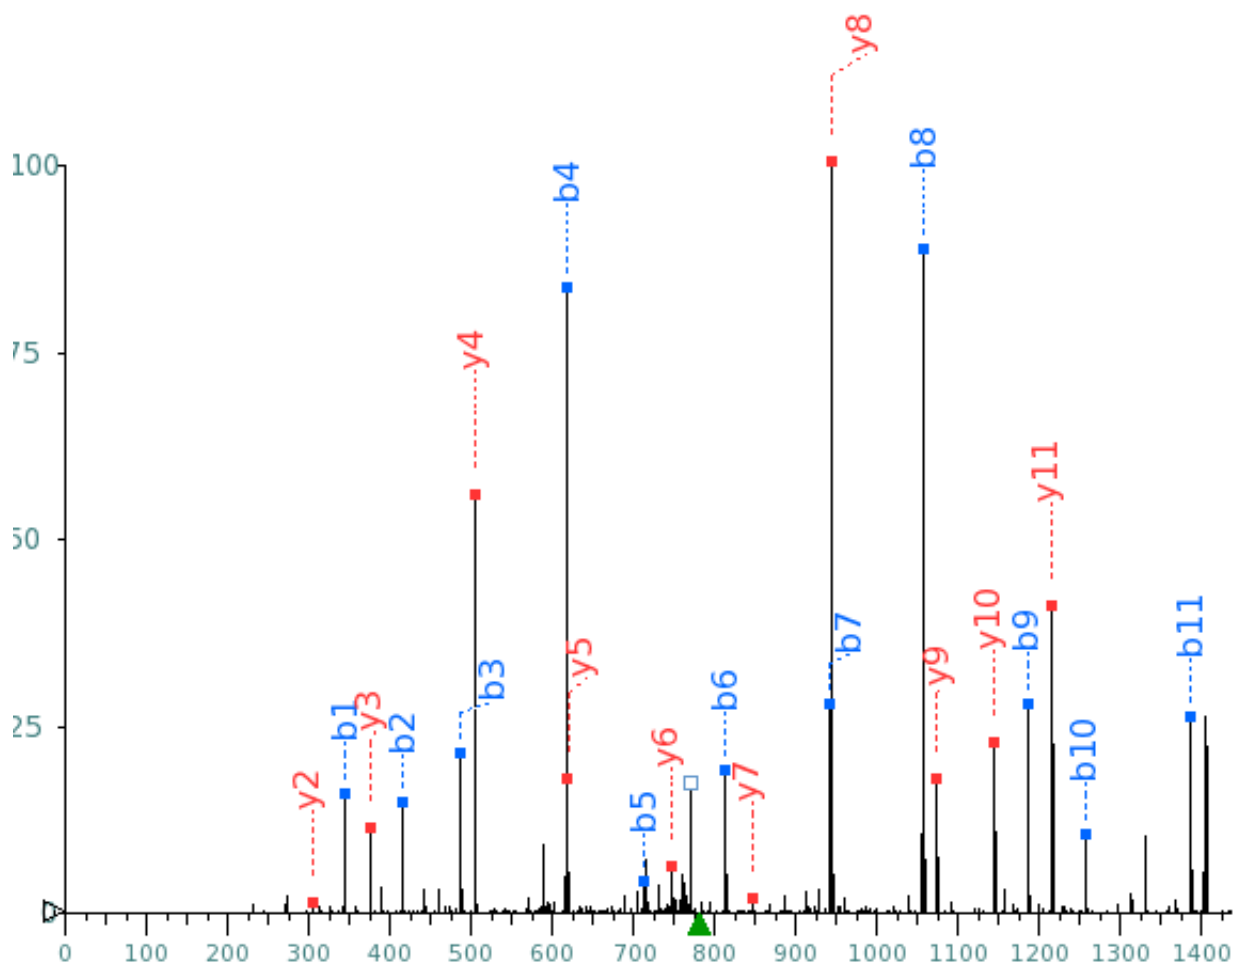

# DAAEPVEDEAER (+2)

Primary Reference: ST32C\_HUMAN

Search ID: 75074

Search Name: 20141216\_QLhumanTMT6lowres\_Obj15720\_CETSA\_1203\_Set1\_Fraction\_06

Scan#: 11793

Observed Mass: 780.3732 (0.3 ppm)

PSM Score: 70.8



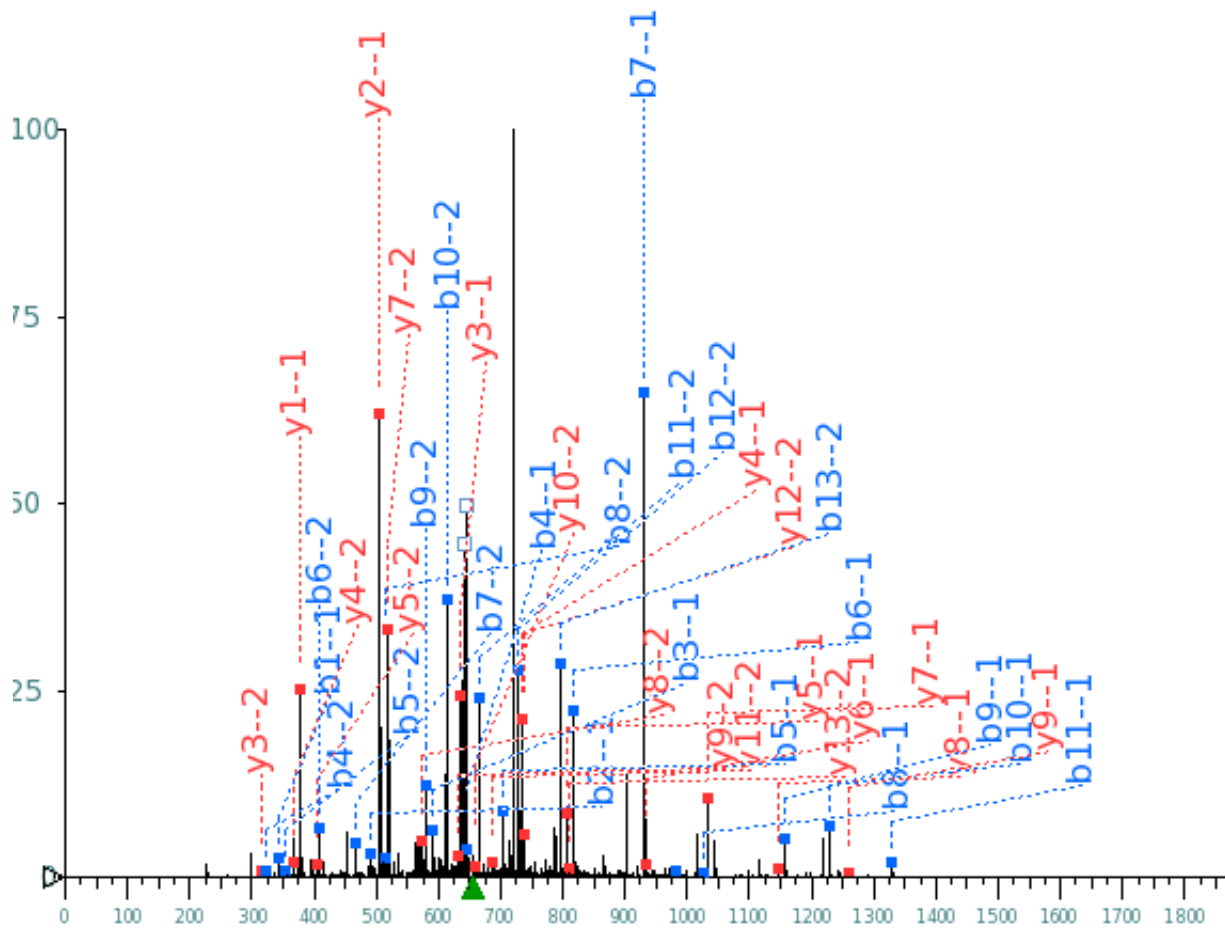

# IFVGGLNPEATEEK (+3)

Primary Reference: B4DMY3\_HUMAN

Search ID: 75074

Search Name: 20141216\_QLhumanTMT6lowres\_Obj15720\_CETSA\_1203\_Set1\_Fraction\_06

Scan#: 28592

Observed Mass: 654.7033 (0.3 ppm)

PSM Score: 22.88

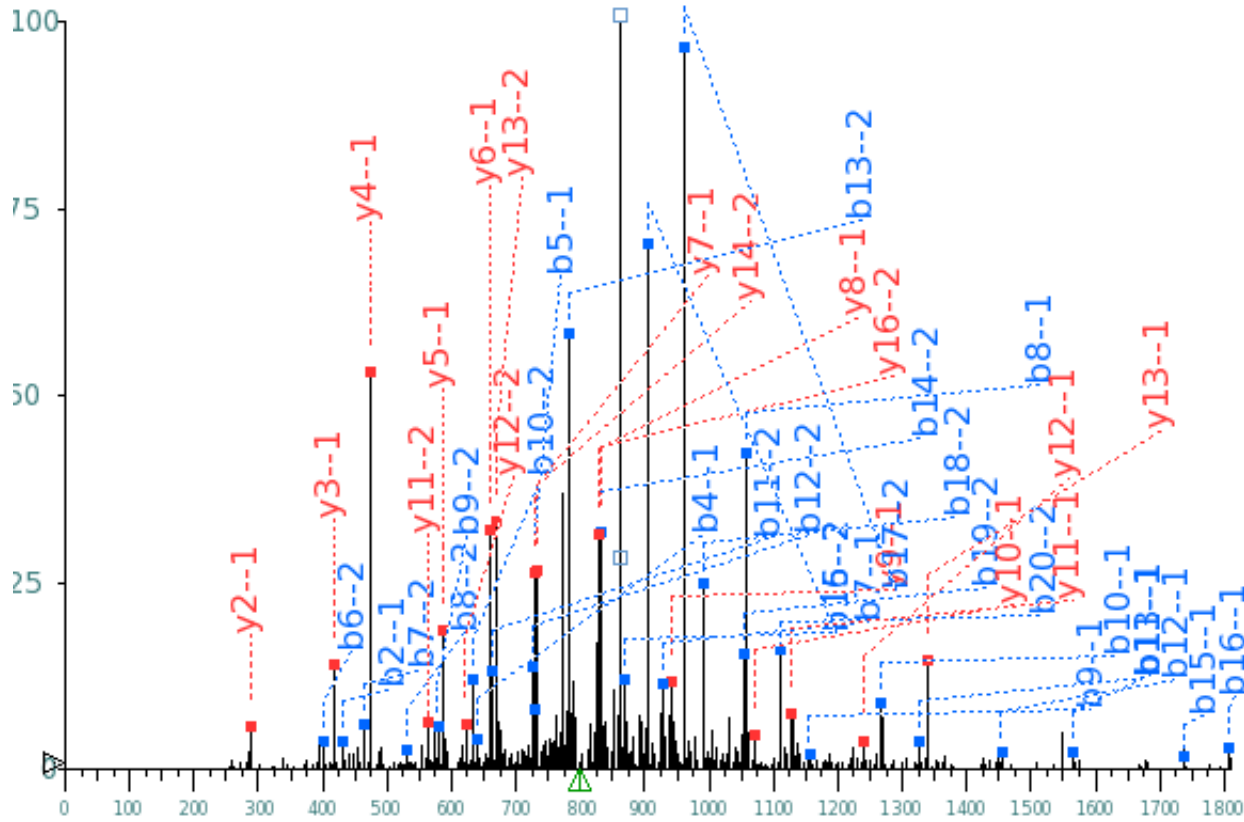

# **AEPNSAEEPLGQLTAALGELR (+3)**

Primary Reference: FANCA\_HUMAN

Search ID: 75074

Search Name: 20141216\_QLhumanTMT6lowres\_Obj15720\_CETSA\_1203\_Set1\_Fraction\_06

Scan#: 39741

Observed Mass: 799.0938 (0.1 ppm)

PSM Score: 79.46

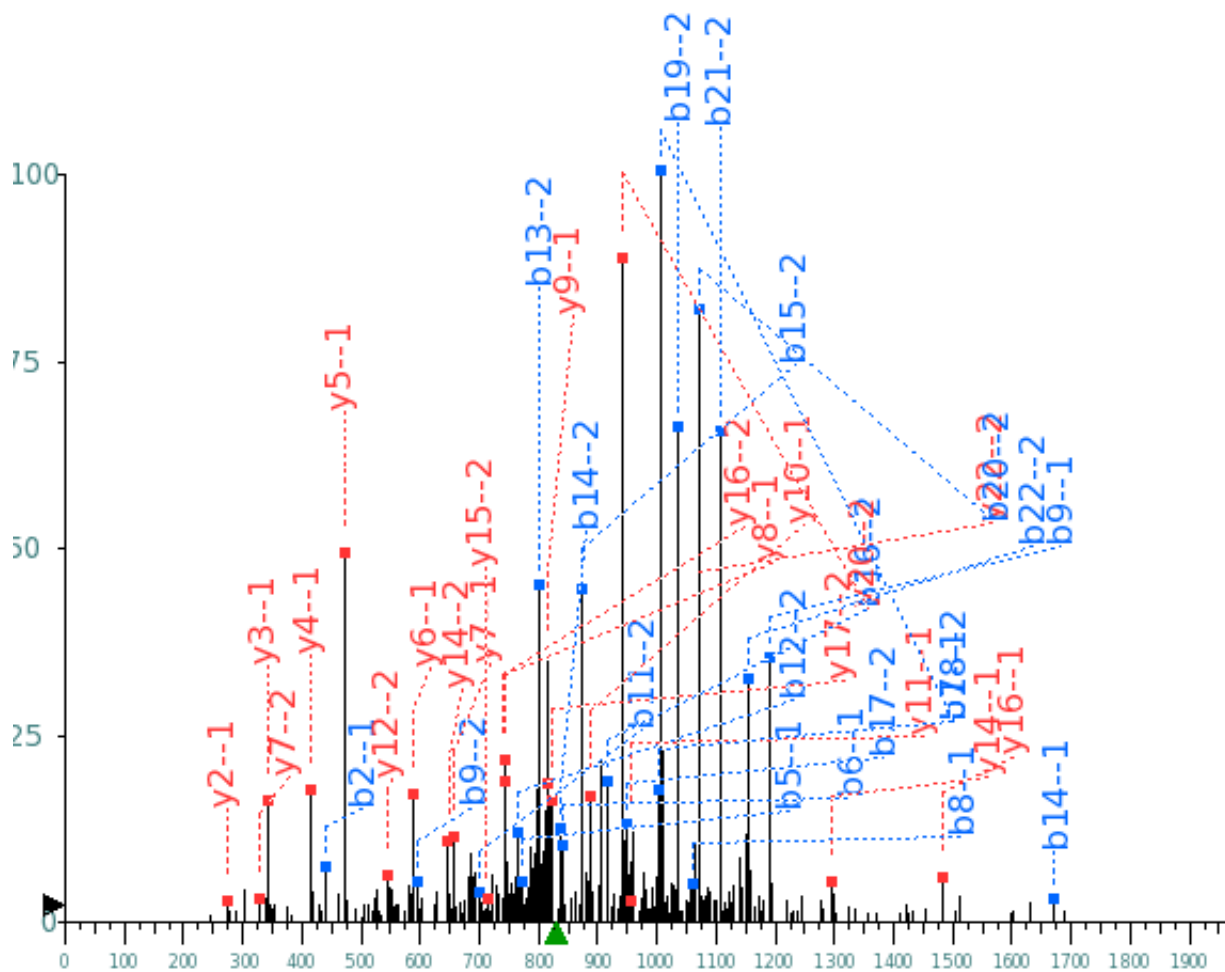

# LVCPAAYGEPLQAAASALGAAVR (+3)

Primary Reference: F8I2\_HUMAN

Search ID: 75074

Search Name: 20141216\_QLhumanTMT6lowres\_Obj15720\_CETSA\_1203\_Set1\_Fraction\_06

Scan#: 42007

Observed Mass: 829.1201 (1 ppm)

PSM Score: 53.5

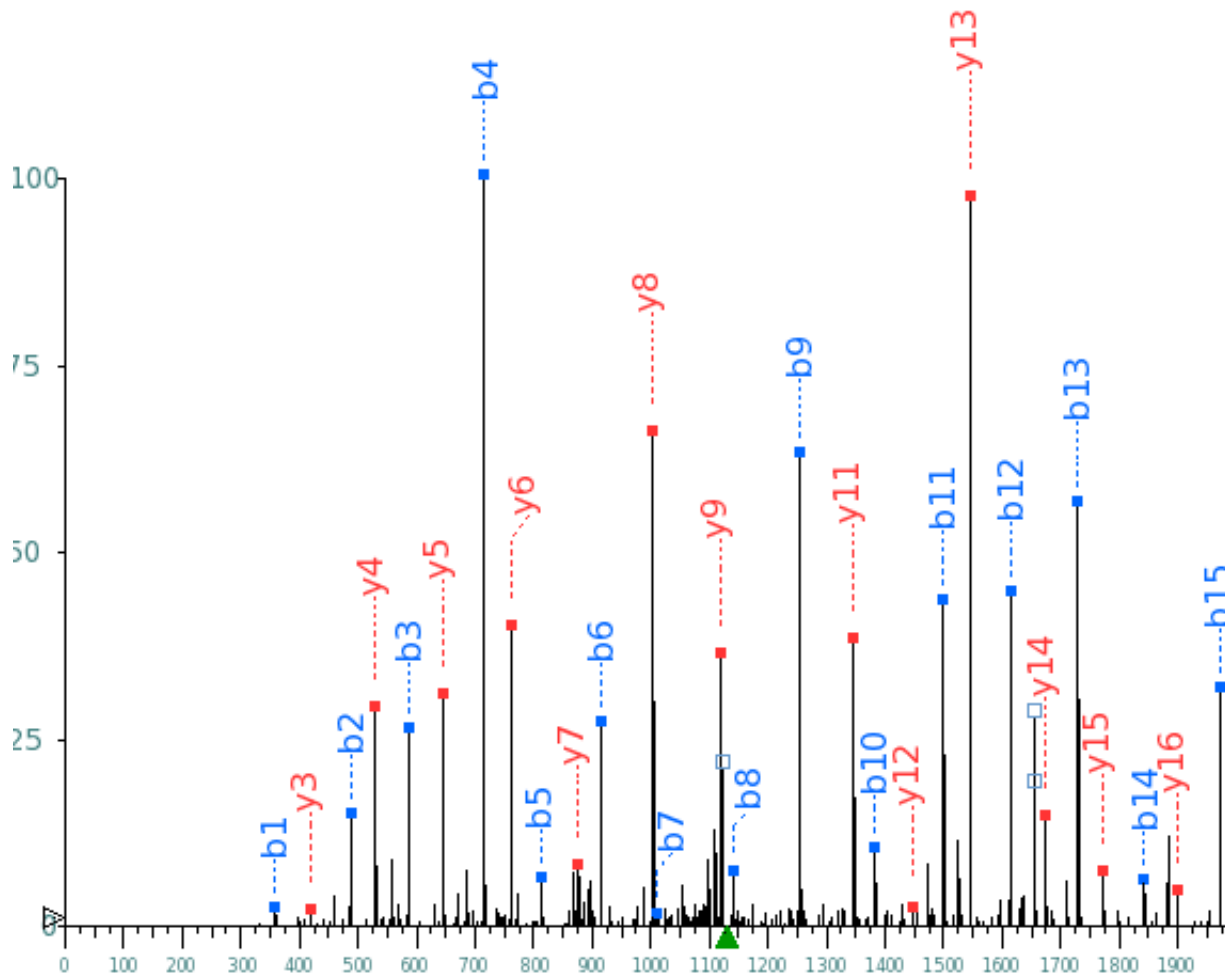

# EQVEPTPEDEDDIELR (+2)

Primary Reference: PEG10\_HUMAN

Search ID: 75075

Search Name: 20141216\_QLhumanTMT6lowres\_Obj15720\_CETSA\_1203\_Set1\_Fraction\_07

Scan#: 21777

Observed Mass: 1129.529 (-0.1 ppm)

PSM Score: 76.32

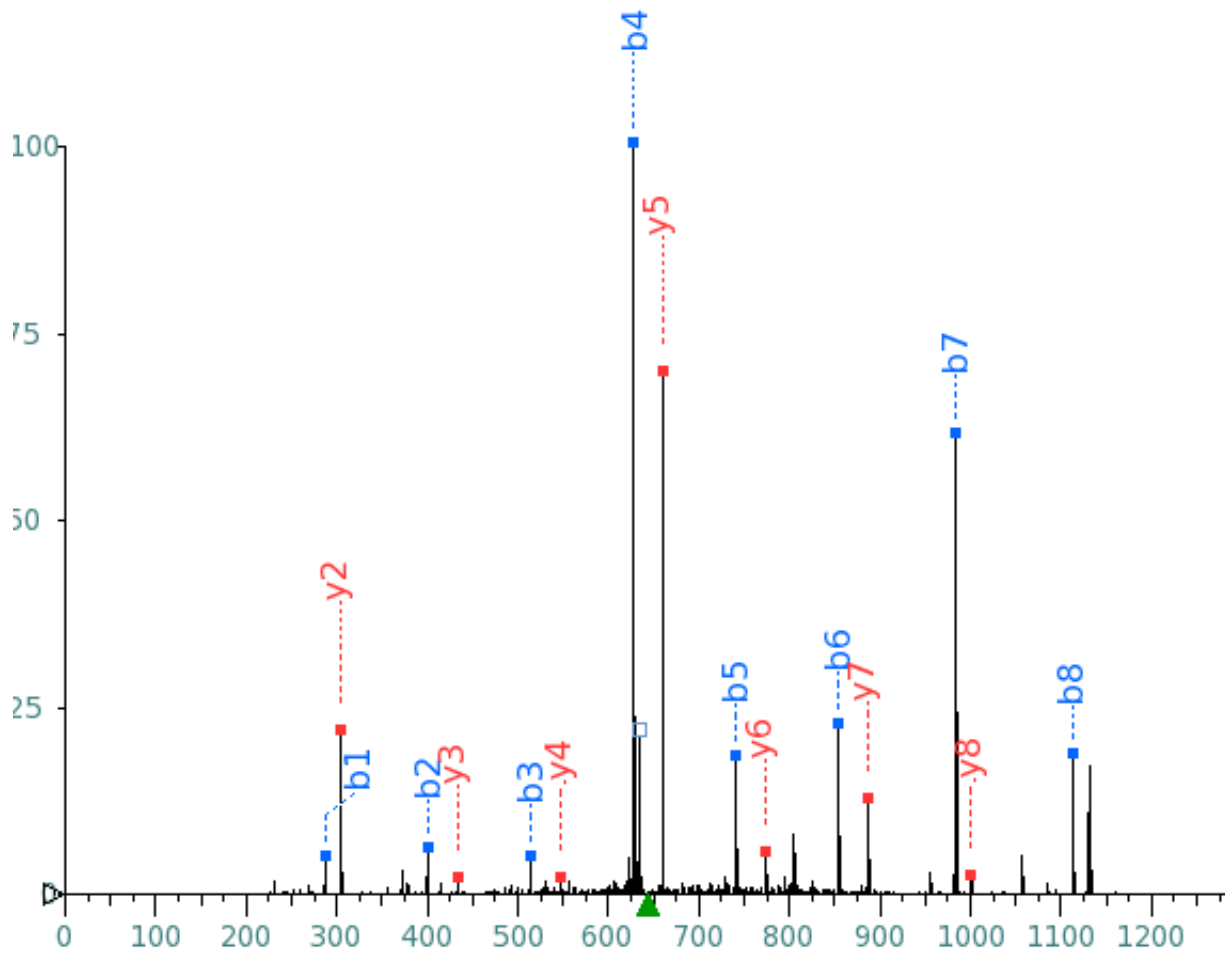

# GIIDLIEER (+2)

Primary Reference: E5KND7\_HUMAN

Search ID: 75075

Search Name: 20141216\_QLhumanTMT6lowres\_Obj15720\_CETSA\_1203\_Set1\_Fraction\_07

Scan#: 31038

Observed Mass: 643.8805 (1.6 ppm)

PSM Score: 69.63

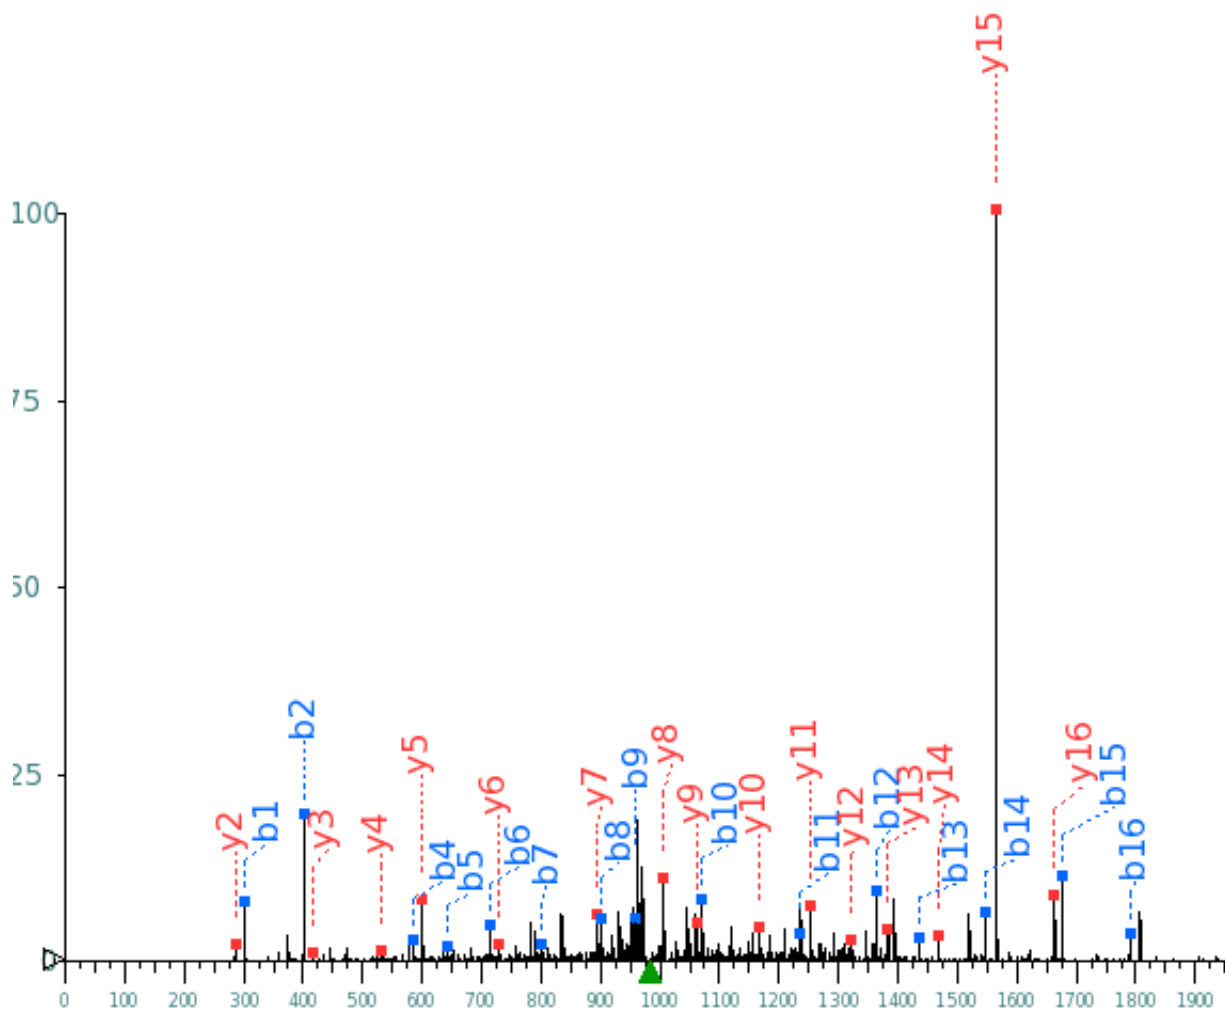

# AVPSGASTGIYEALRLR (+2)

Primary Reference: A4UCS8\_HUMAN

Search ID: 75075

Search Name: 20141216\_QLhumanTMT6lowres\_Obj15720\_CETSA\_1203\_Set1\_Fraction\_07

Scan#: 31829

Observed Mass: 982.0378 (-0.7 ppm)

PSM Score: 57.15

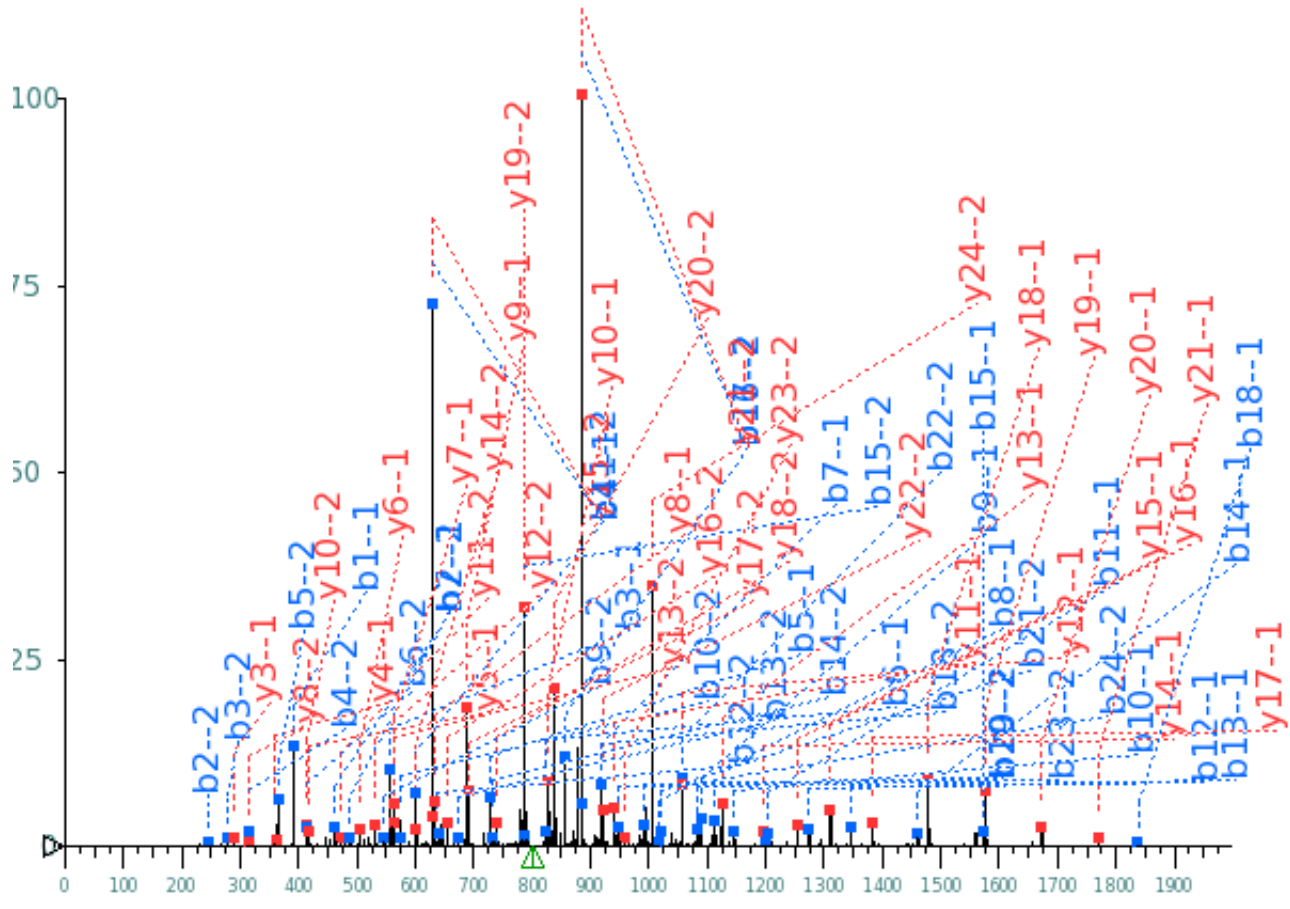

# CPAAPPPPAGGAANNHGAGSGAGGR (+3)

Primary Reference: Q96GF2\_HUMAN

Search ID: 75076

Search Name: 20141216\_QLhumanTMT6lowres\_Obj15720\_CETSA\_1203\_Set1\_Fraction\_08

Scan#: 9953

Observed Mass: 800.0598 (0.7 ppm)

PSM Score: 105

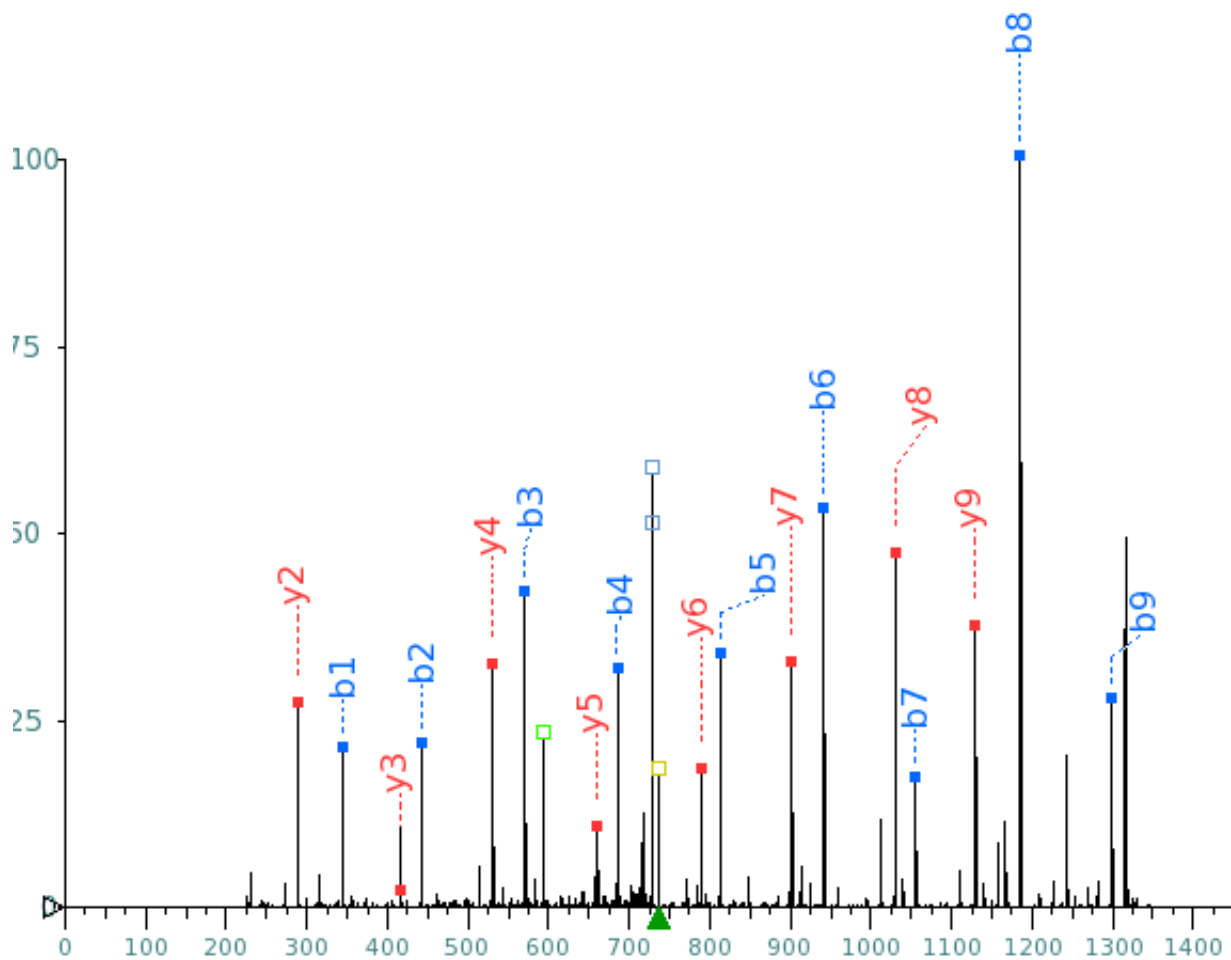

# NVQLQENEIR (+2)

Primary Reference: PP1G\_HUMAN

Search ID: 75076

Search Name: 20141216\_QLhumanTMT6lowres\_Obj15720\_CETSA\_1203\_Set1\_Fraction\_08

Scan#: 16033

Observed Mass: 736.4071 (0.2 ppm)

PSM Score: 66.17



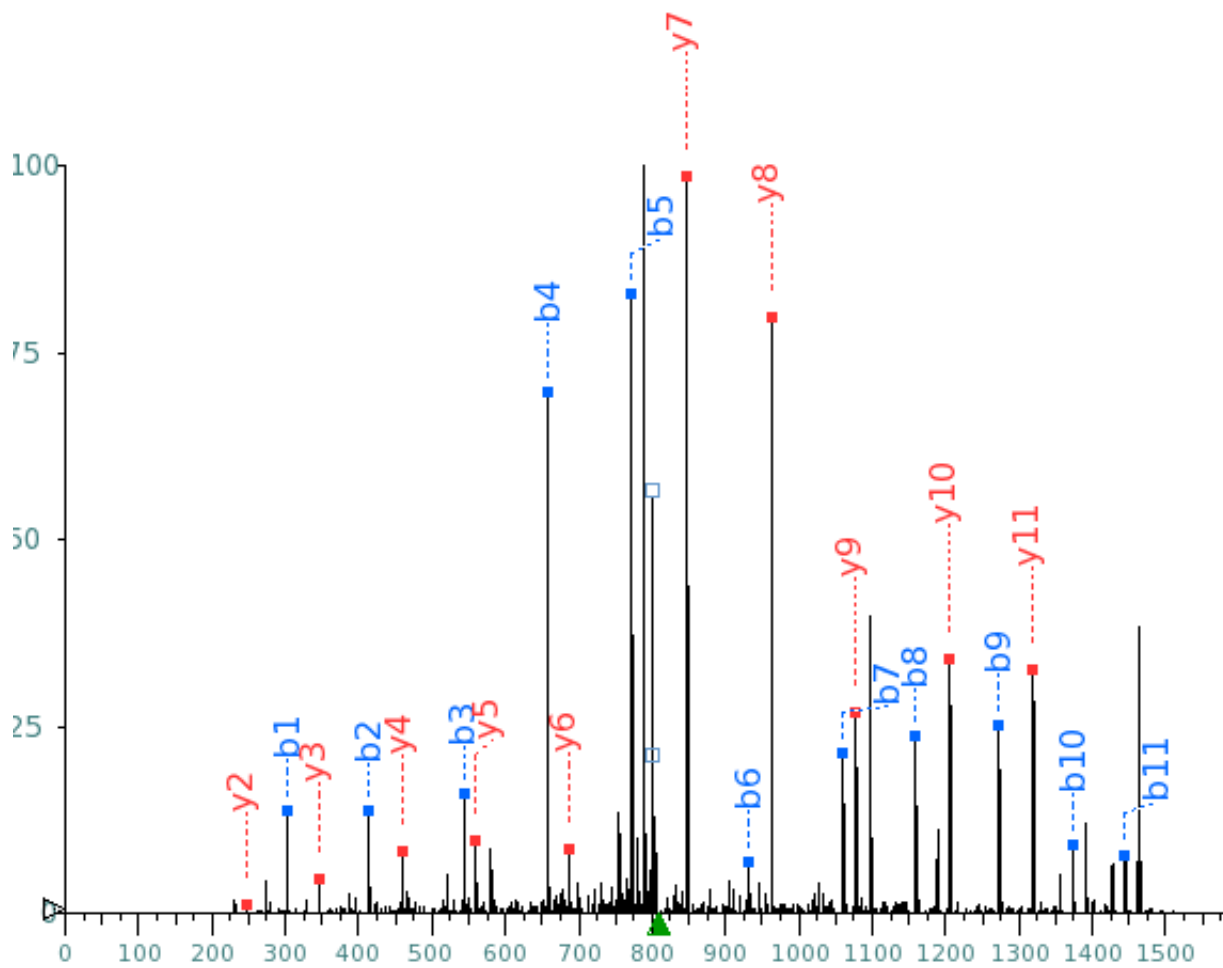

# AIQDDCQVITAR (+2)

Primary Reference: FFR\_HUMAN

Search ID: 75076

Search Name: 20141216\_QLhumanTMT6lowres\_Obj15720\_CETSA\_1203\_Set1\_Fraction\_08

Scan#: 17234

Observed Mass: 809.9253 (0.8 ppm)

PSM Score: 58.69

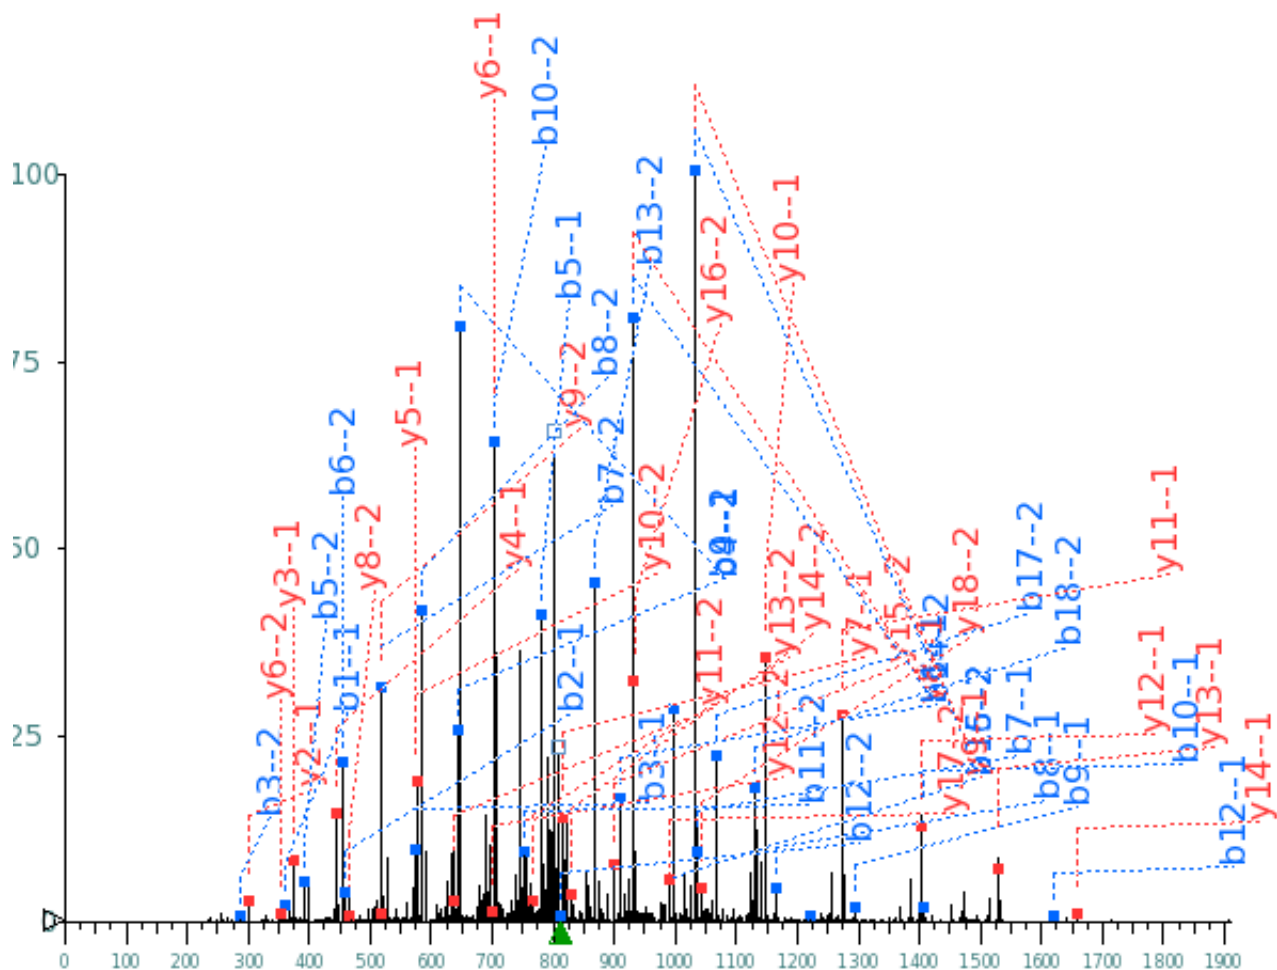

# QTIAHQQQLTNLQMAAQR (+3)

Primary Reference: E9PMU7\_HUMAN

Search ID: 75076

Search Name: 20141216\_QLhumanTMT6lowres\_Obj15720\_CETSA\_1203\_Set1\_Fraction\_08

Scan#: 18605

Observed Mass: 813.1029 (0.4 ppm)

PSM Score: 76.08

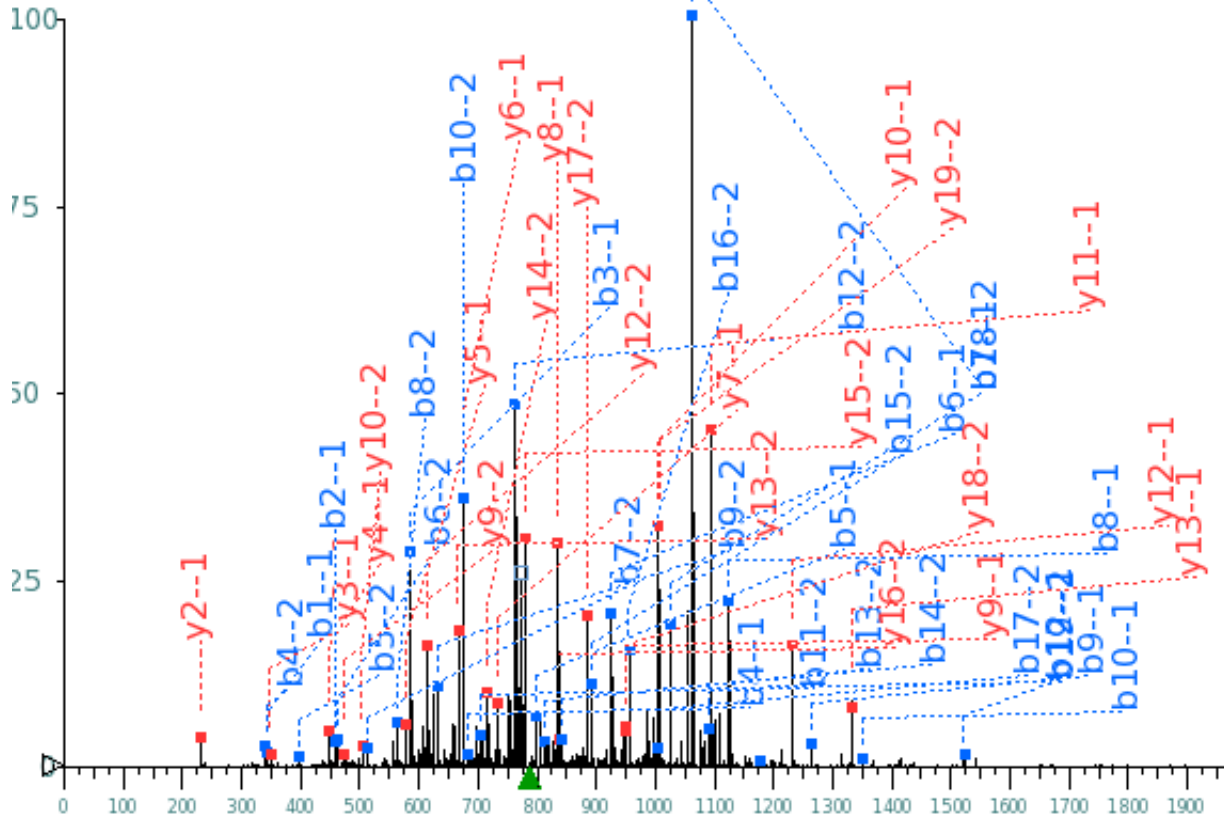

# IIEPNEVTHSGDTGVETDGR (+3)

Primary Reference: B4E2P4\_HUMAN

Search ID: 75076

Search Name: 20141216\_QLhumanTMT6lowres\_Obj15720\_CETSA\_1203\_Set1\_Fraction\_08

Scan#: 18929

Observed Mass: 785.7258 (0.2 ppm)

PSM Score: 48.97

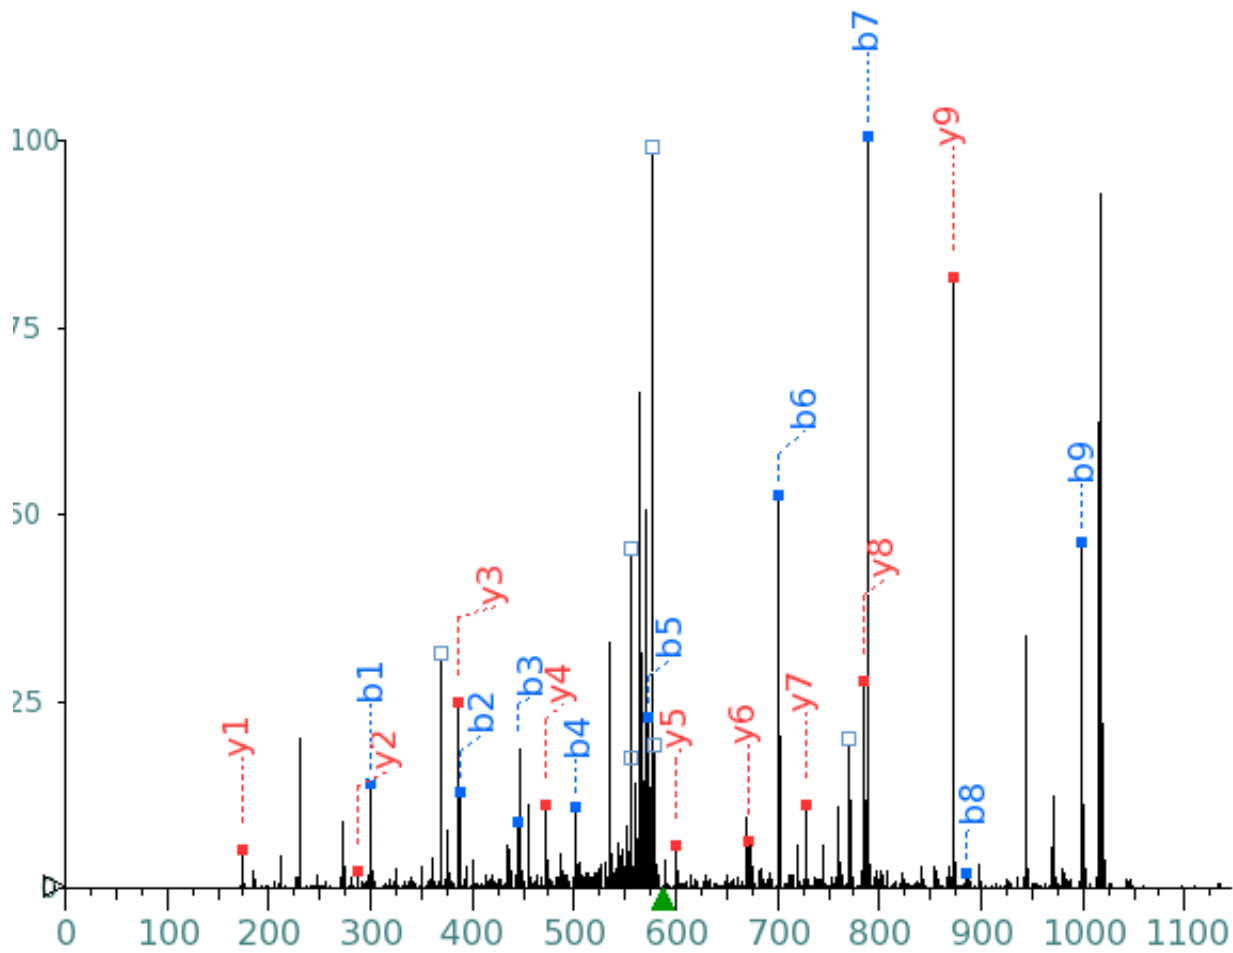

# ASGGAQSPLR (+2)

Primary Reference: ANR54\_HUMAN

Search ID: 75077

Search Name: 20141216\_QLhumanTMT6lowres\_Obj15720\_CETSA\_1203\_Set1\_Fraction\_09

Scan#: 9677

Observed Mass: 586.834 (1.9 ppm)

PSM Score: 22.7

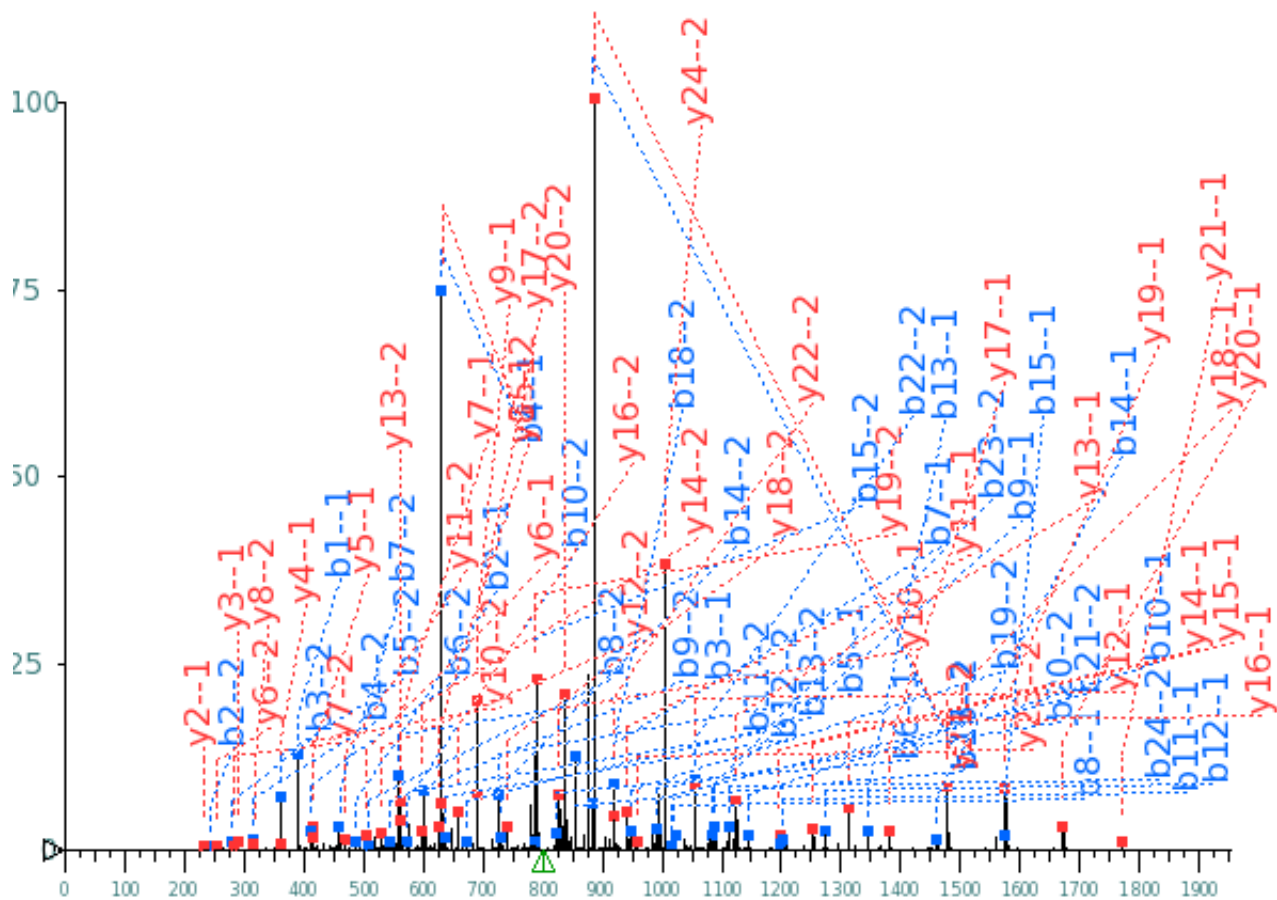

# CPAAPPPPAGGAANNHGAGSGAGGR (+3)

Primary Reference: Q96GF2\_HUMAN

Search ID: 75077

Search Name: 20141216\_QLhumanTMT6lowres\_Obj15720\_CETSA\_1203\_Set1\_Fraction\_09

Scan#: 10331

Observed Mass: 800.0602 (1.2 ppm)

PSM Score: 103.36

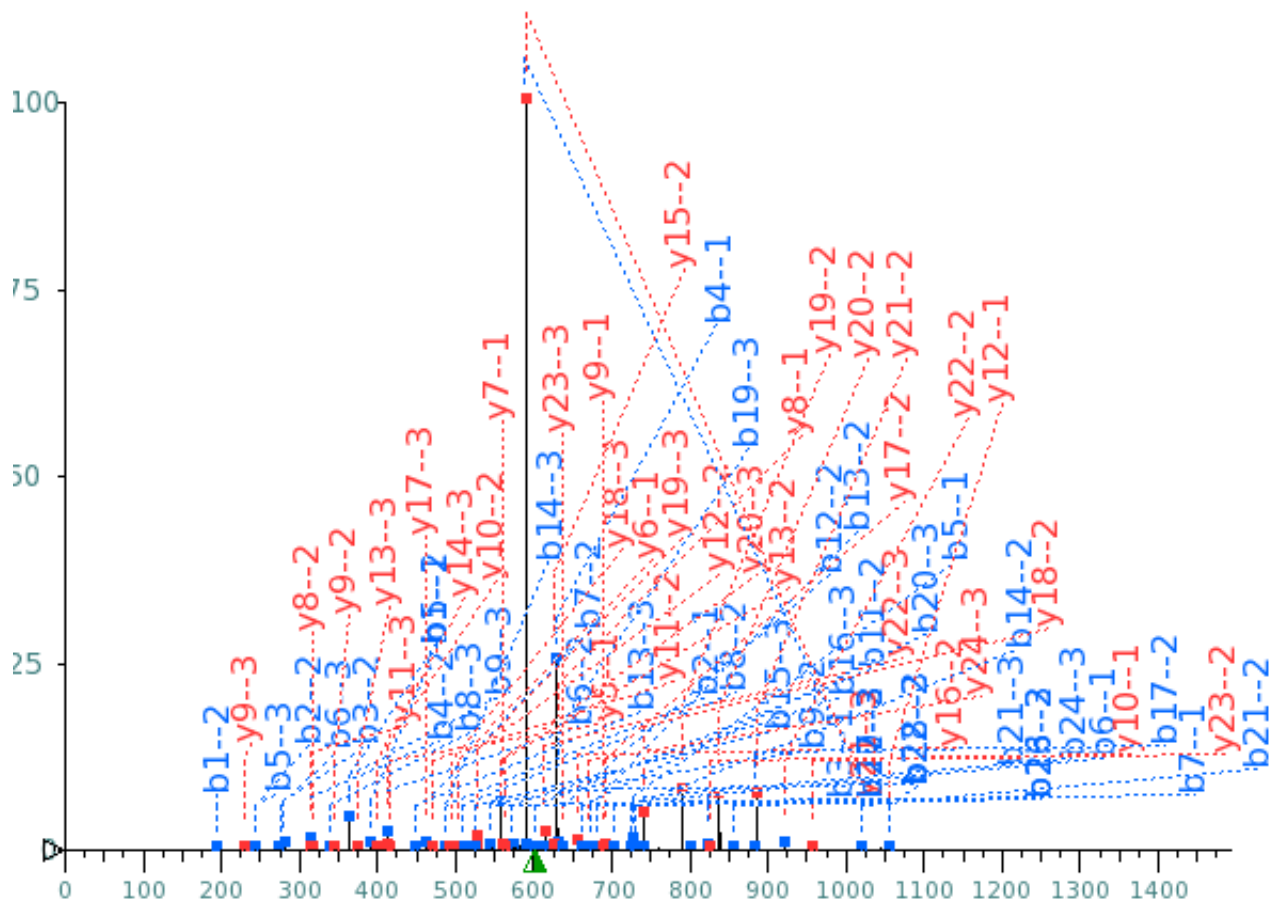

# CPAAPPPPAGGAANNHGAGSGAGGR (+4)

Primary Reference: Q96GF2\_HUMAN

Search ID: 75077

Search Name: 20141216\_QLhumanTMT6lowres\_Obj15720\_CETSA\_1203\_Set1\_Fraction\_09

Scan#: 10362

Observed Mass: 600.297 (1.3 ppm)

PSM Score: 20.81

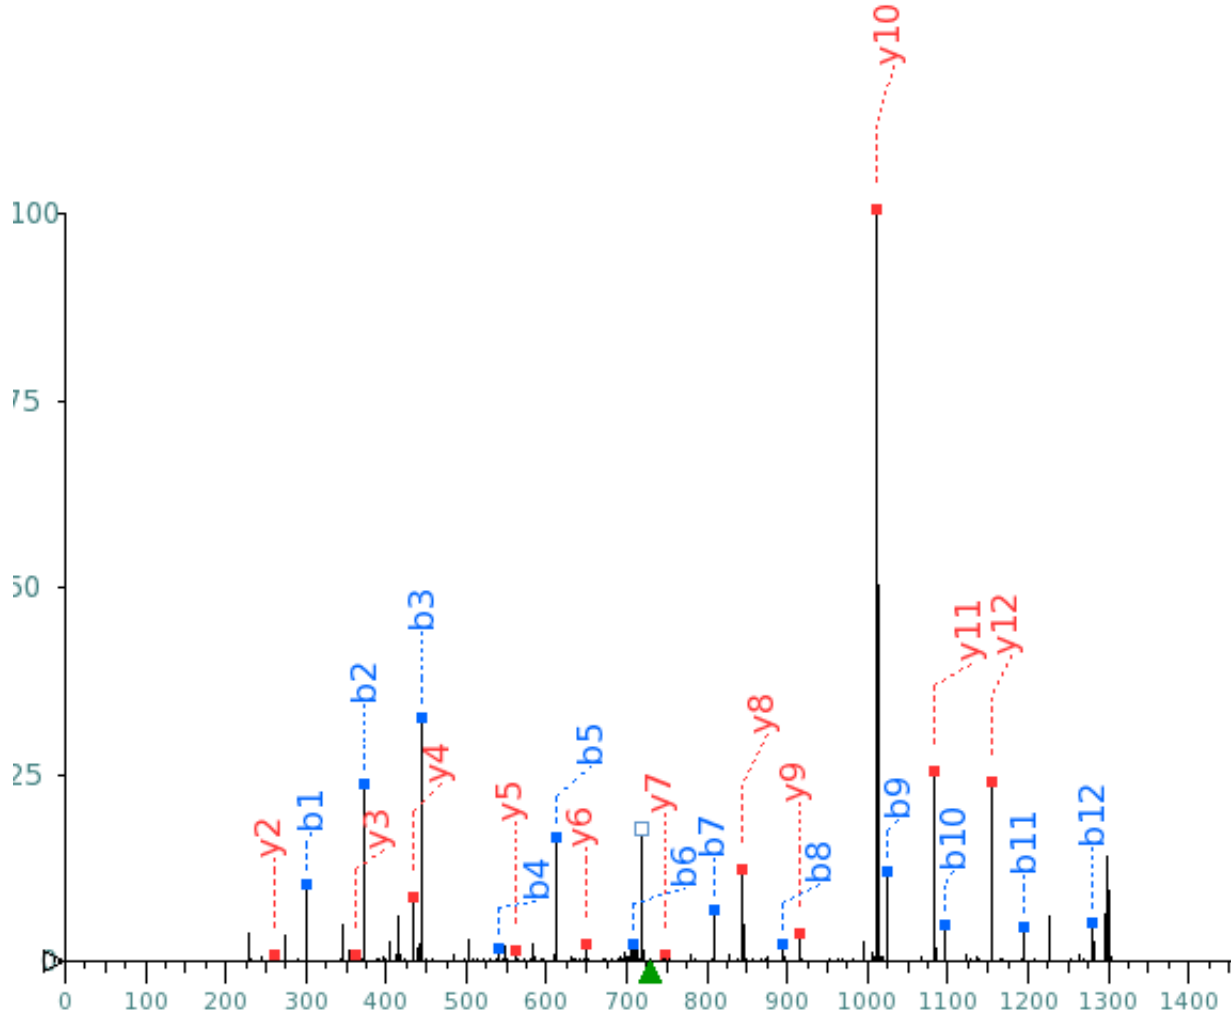

# AAAPAPVSEAVSR (+2)

Primary Reference: A8K8C4\_HUMAN

Search ID: 75077

Search Name: 20141216\_QLhumanTMT6lowres\_Obj15720\_CETSA\_1203\_Set1\_Fraction\_09

Scan#: 15314

Observed Mass: 727.9122 (0.4 ppm)

PSM Score: 51.65

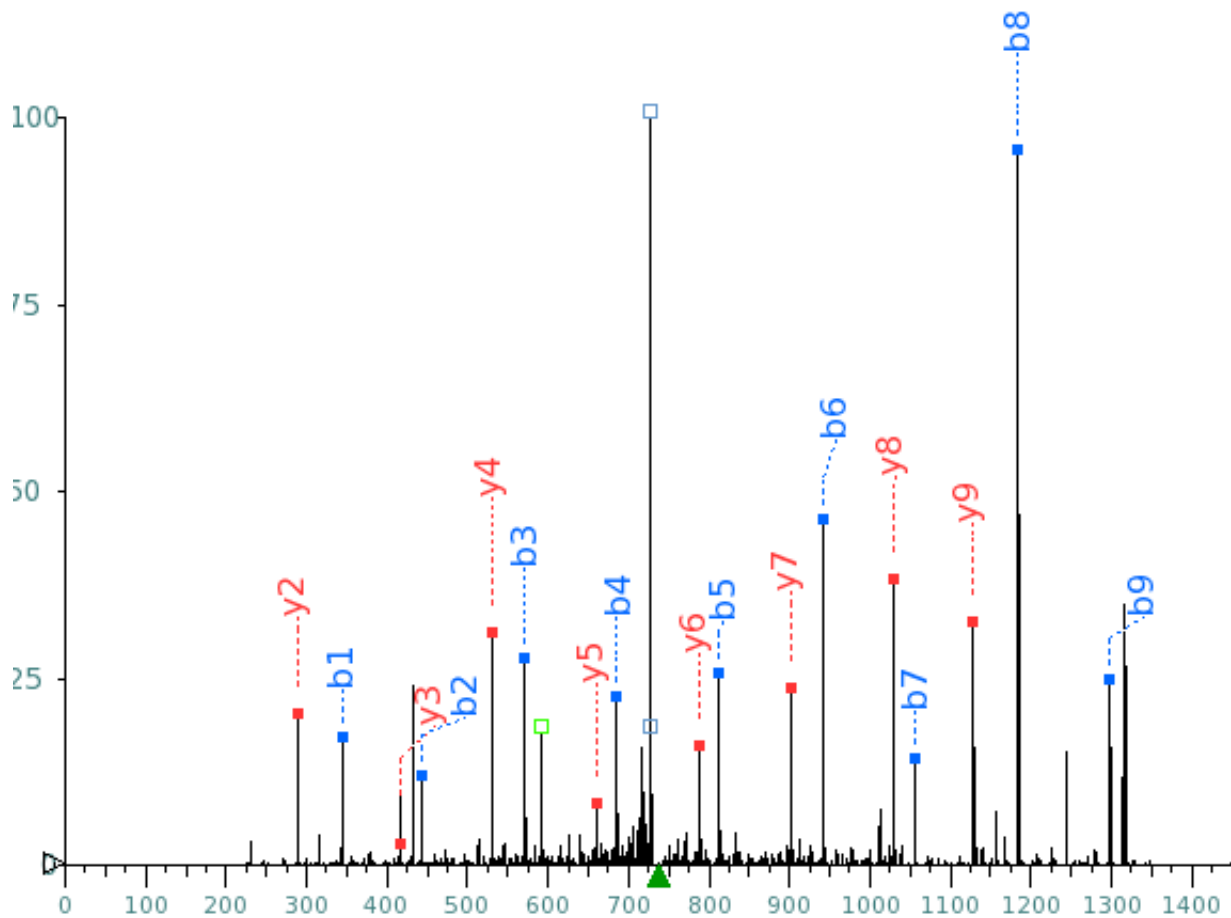

# NVQLQENEIR (+2)

Primary Reference: PP1G\_HUMAN

Search ID: 75077

Search Name: 20141216\_QLhumanTMT6lowres\_Obj15720\_CETSA\_1203\_Set1\_Fraction\_09

Scan#: 16581

Observed Mass: 736.4067 (-0.4 ppm)

PSM Score: 47.23



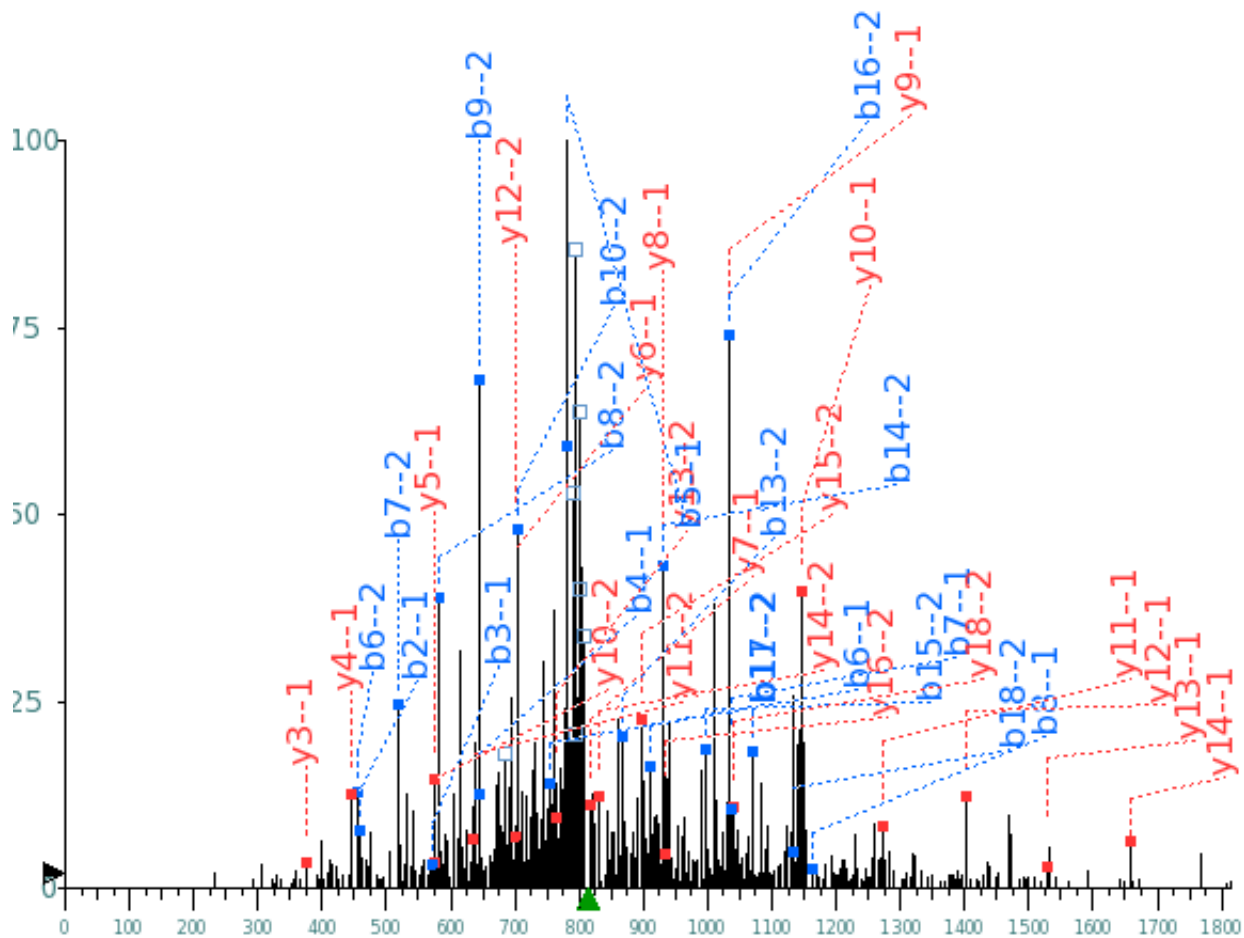

# QTIAHQQQQLTNLQMAAQR (+3)

Primary Reference: E9PMU7\_HUMAN

Search ID: 75077

Search Name: 20141216\_QLhumanTMT6lowres\_Obj15720\_CETSA\_1203\_Set1\_Fraction\_09

Scan#: 19181

Observed Mass: 813.1026 (0.1 ppm)

PSM Score: 24.18

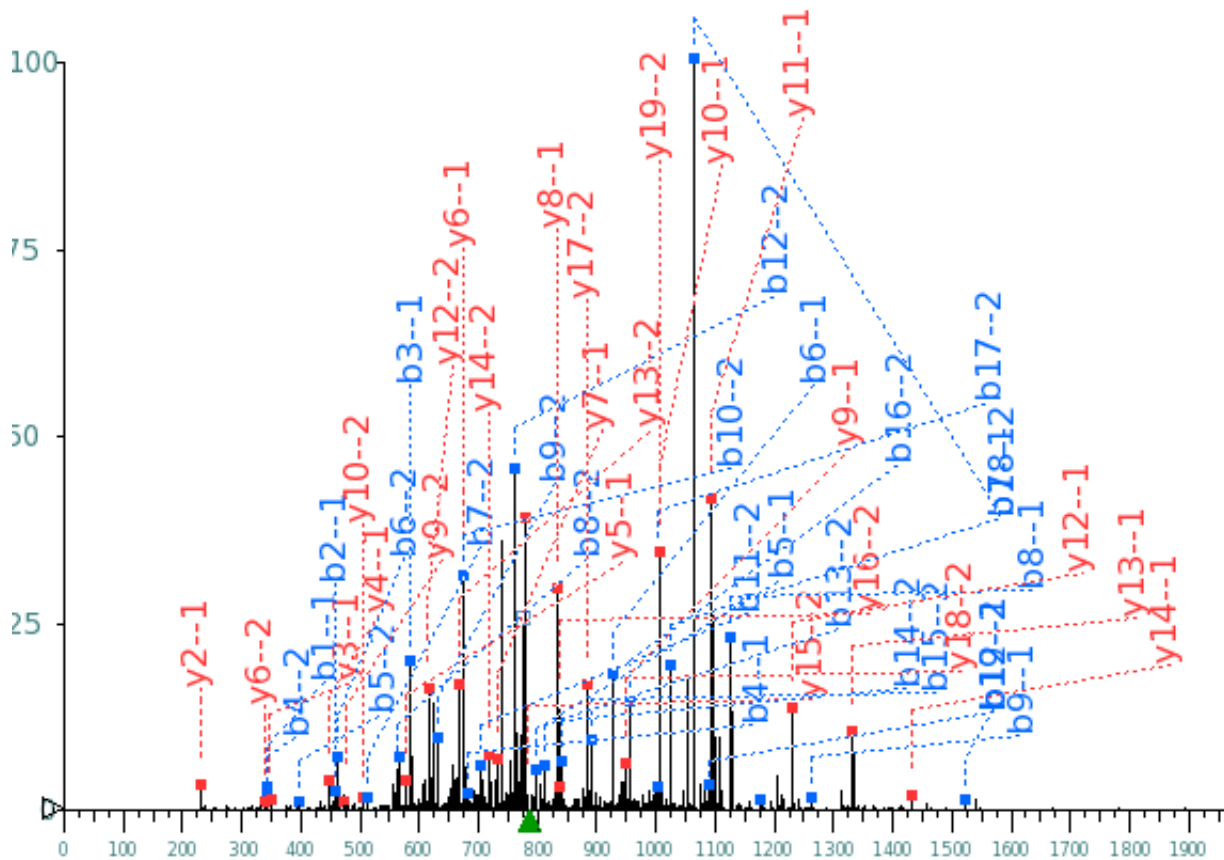

# IIEPNEVTHSGDTGVETDGR (+3)

Primary Reference: B4E2P4\_HUMAN

Search ID: 75077

Search Name: 20141216\_QLhumanTMT6lowres\_Obj15720\_CETSA\_1203\_Set1\_Fraction\_09

Scan#: 19393

Observed Mass: 785.7256 (-0.2 ppm)

PSM Score: 51.44

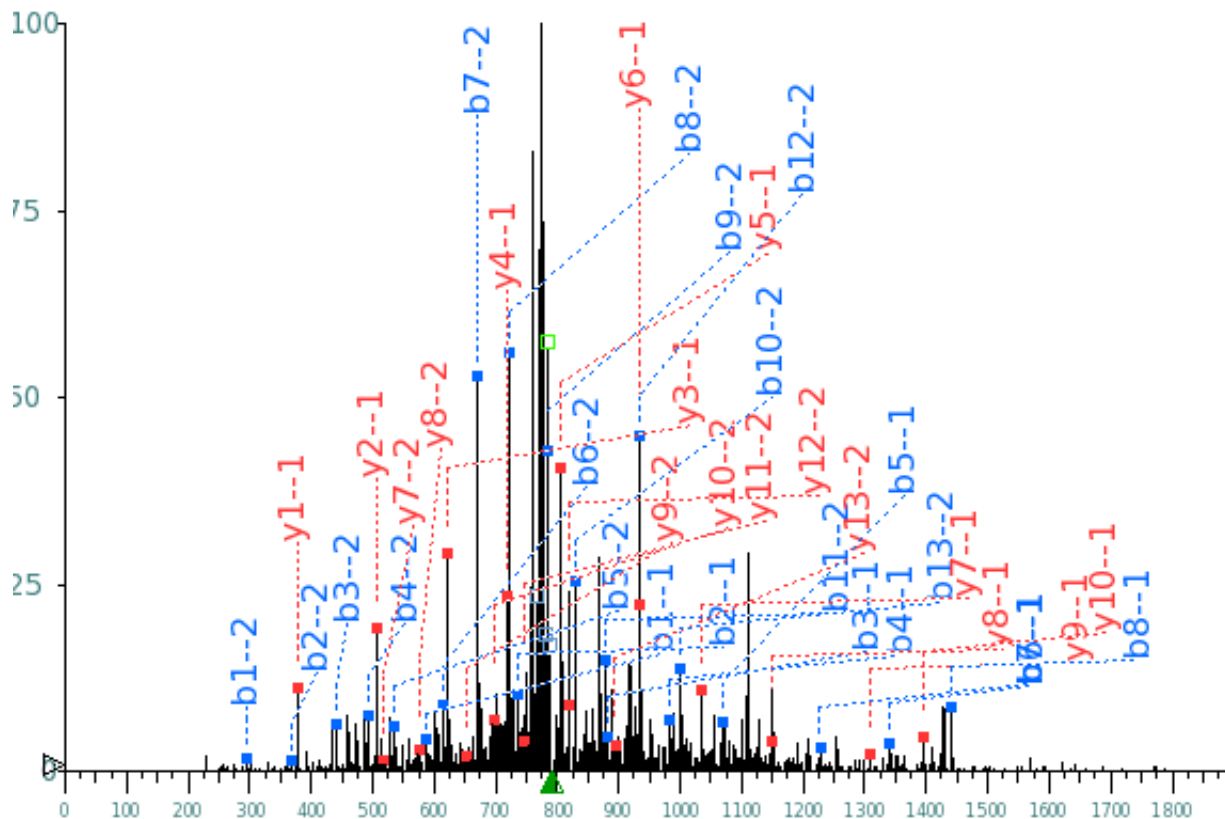

# KFFVSCNVQSVDEK (+3)

Primary Reference: THEM4\_HUMAN

Search ID: 75077

Search Name: 20141216\_QLhumanTMT6lowres\_Obj15720\_CETSA\_1203\_Set1\_Fraction\_09

Scan#: 24325

Observed Mass: 792.1059 (-0.5 ppm)

PSM Score: 26.53

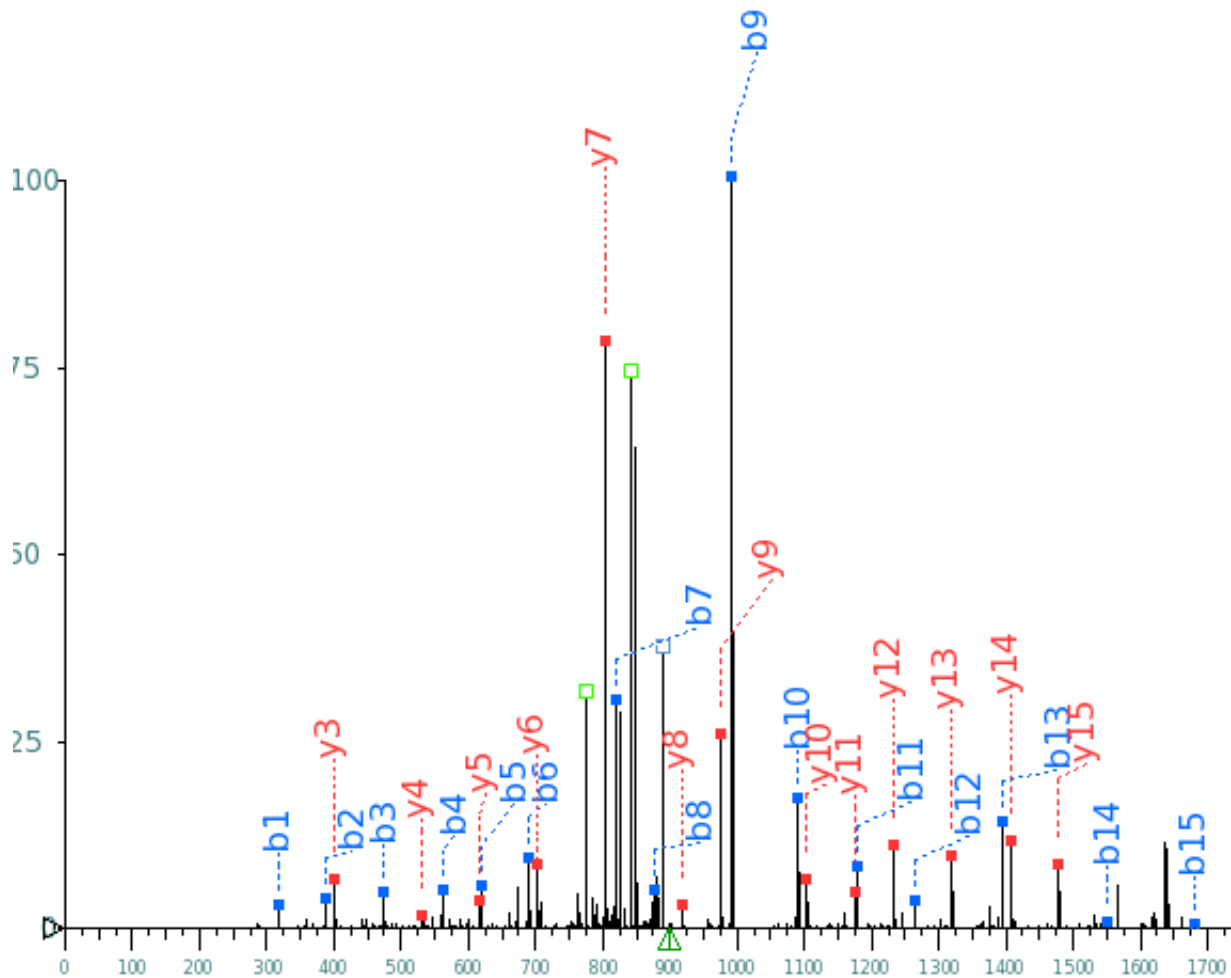

# SASSGAEGDVSSREP (+2)

Primary Reference: DTD1\_HUMAN

Search ID: 75078

Search Name: 20141216\_QLhumanTMT6lowres\_Obj15720\_CETSA\_1203\_Set1\_Fraction\_10

Scan#: 10737

Observed Mass: 897.4219 (0.8 ppm)

PSM Score: 82.82

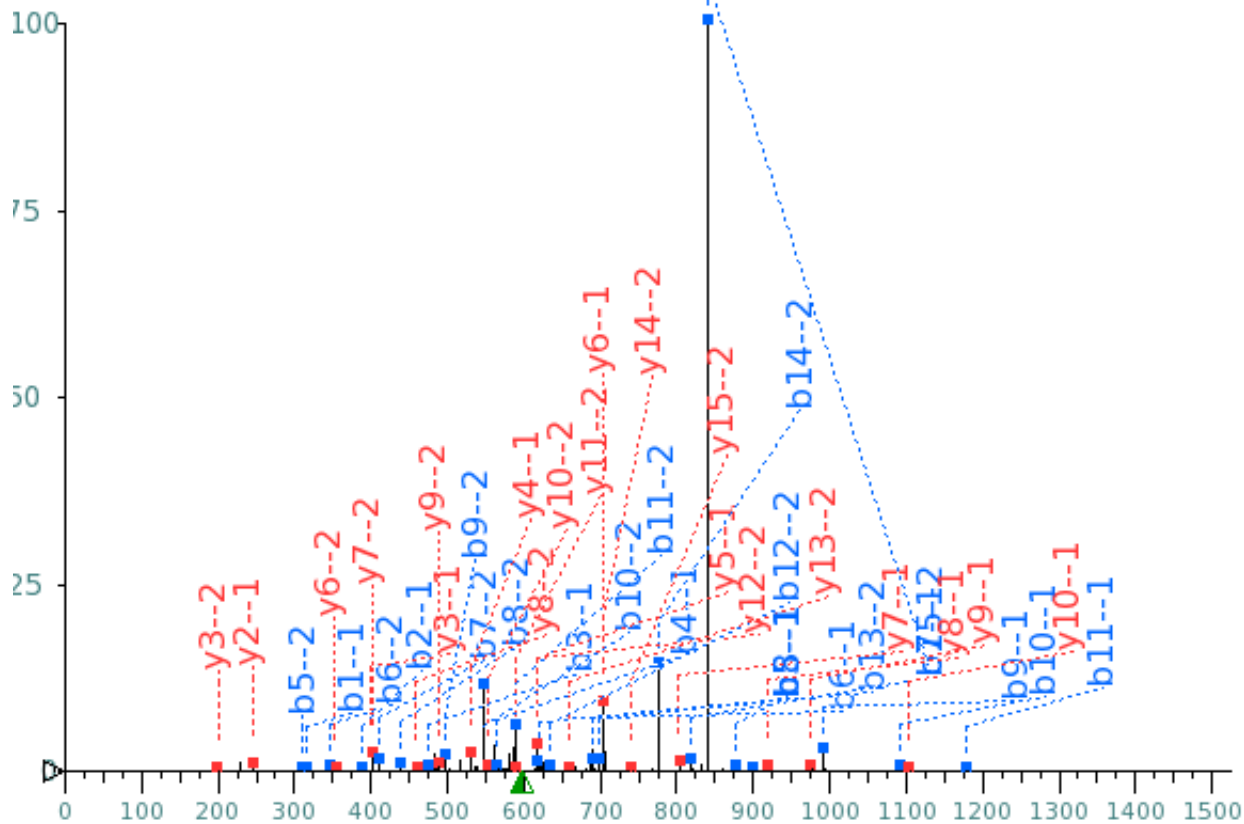

# SASSGAEGDVSSREP (+3)

Primary Reference: DTD1\_HUMAN

Search ID: 75078

Search Name: 20141216\_QLhumanTMT6lowres\_Obj15720\_CETSA\_1203\_Set1\_Fraction\_10

Scan#: 10742

Observed Mass: 598.6171 (1 ppm)

PSM Score: 39.99

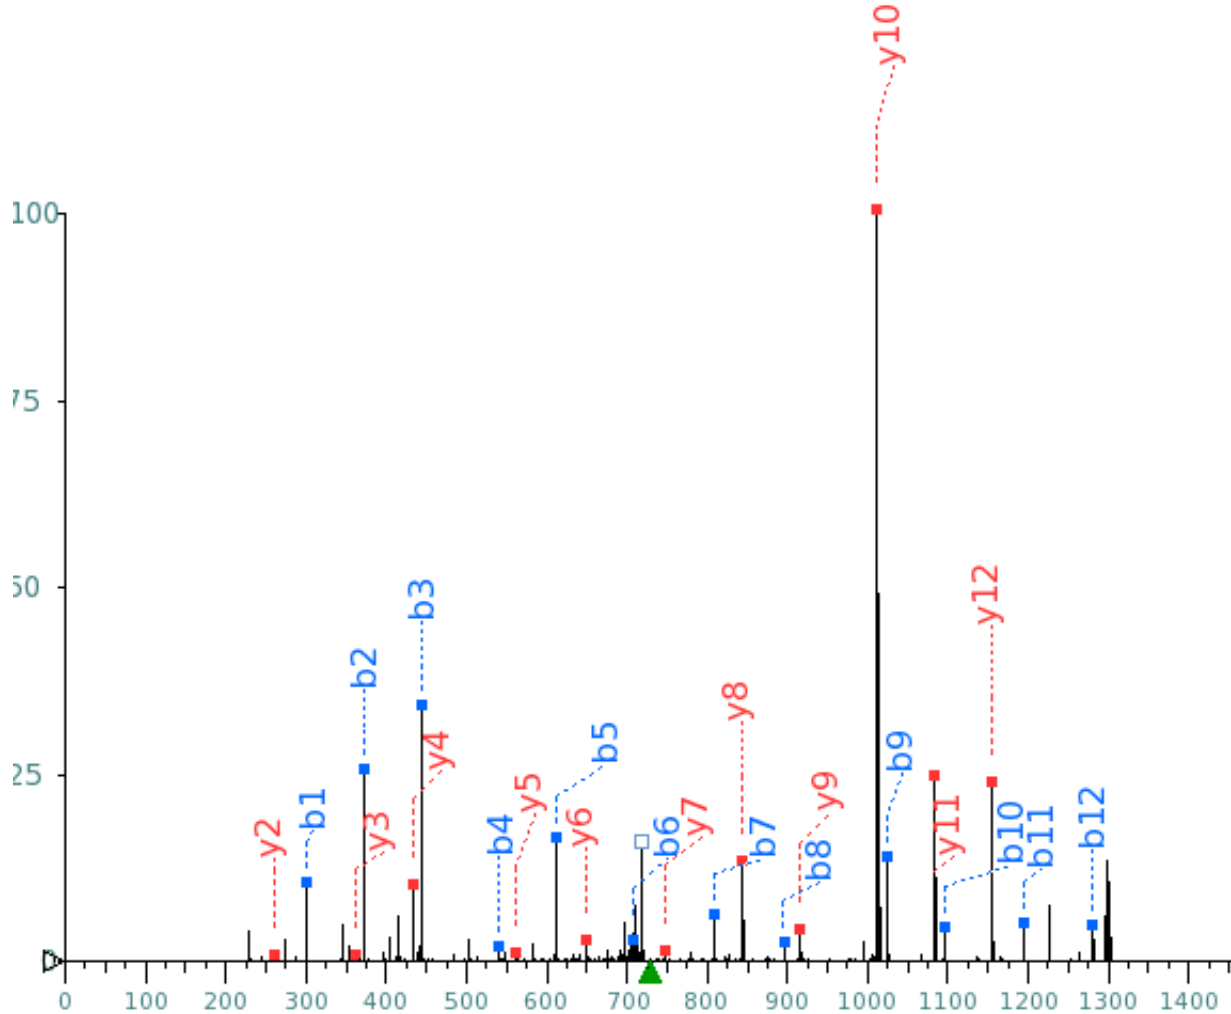

# AAAPAPVSEAVSR (+2)

Primary Reference: A8K8C4\_HUMAN

Search ID: 75078

Search Name: 20141216\_QLhumanTMT6lowres\_Obj15720\_CETSA\_1203\_Set1\_Fraction\_10

Scan#: 15214

Observed Mass: 727.913 (1.6 ppm)

PSM Score: 45.01

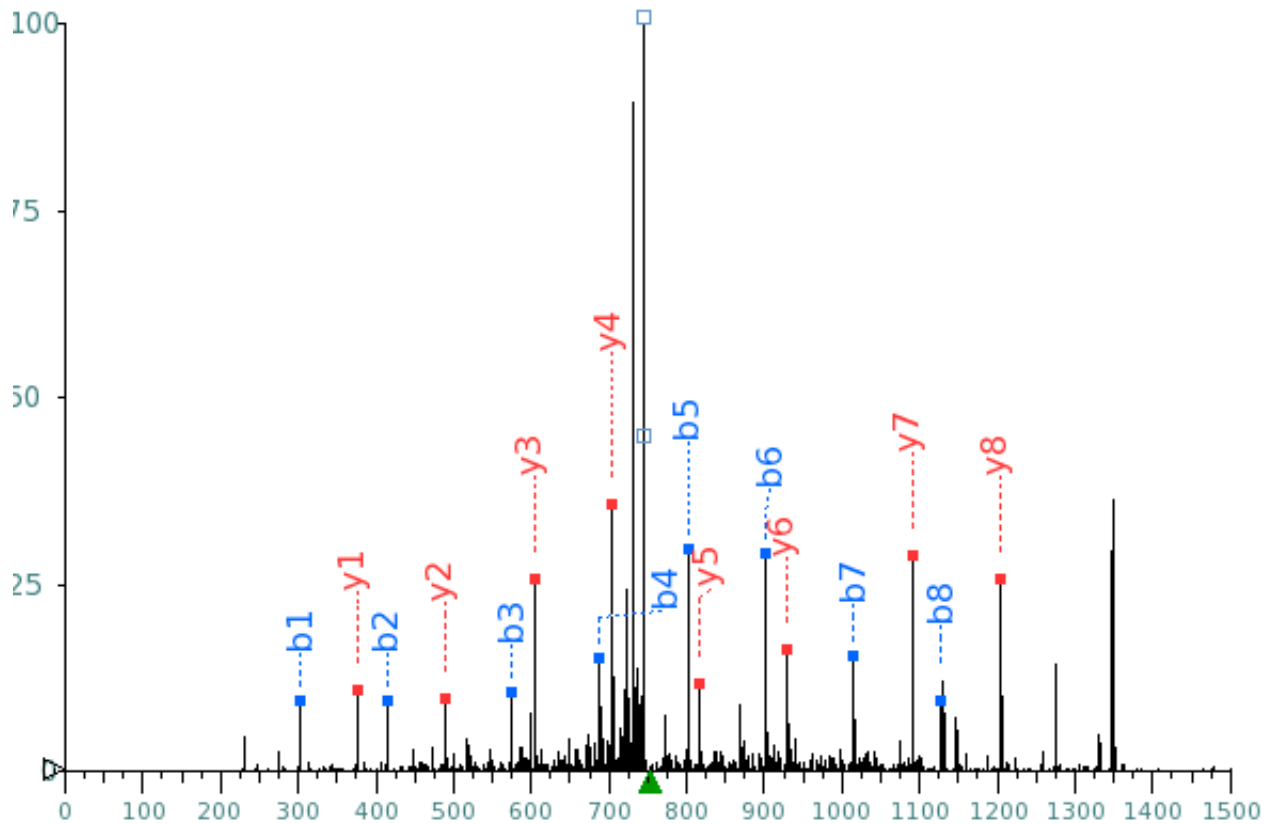

# ALCNIVNNK (+2)

Primary Reference: HUS1\_HUMAN

Search ID: 75078

Search Name: 20141216\_QLhumanTMT6lowres\_Obj15720\_CETSA\_1203\_Set1\_Fraction\_10

Scan#: 20791

Observed Mass: 752.439 (-0.7 ppm)

PSM Score: 53.46

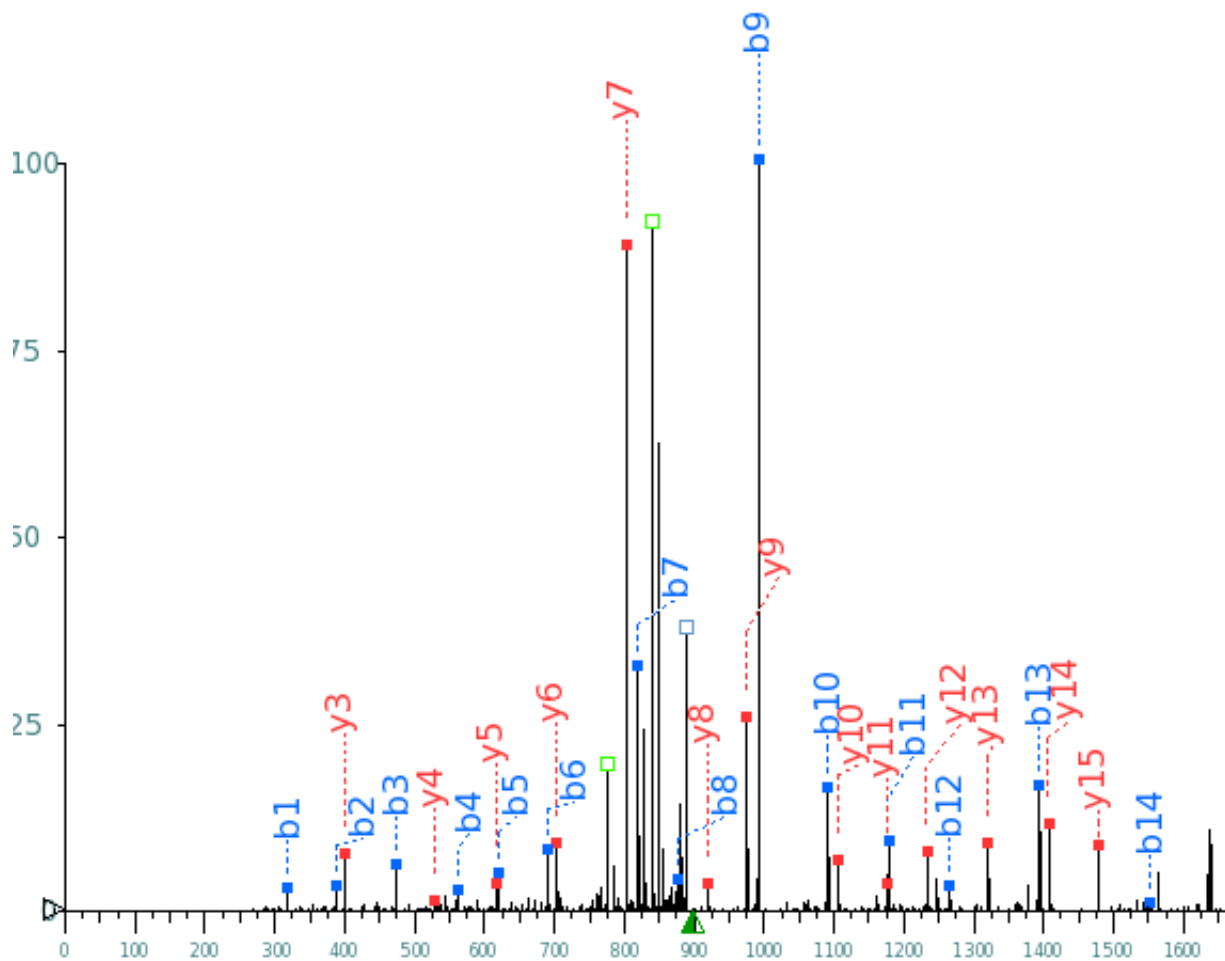

# SASSGAEGDVSSREP (+2)

Primary Reference: DTD1\_HUMAN

Search ID: 75150

Search Name: 20141216\_QLhumanTMT6lowres\_Obj15720\_CETSA\_1203\_Set1\_Fraction\_11

Scan#: 10340

Observed Mass: 897.4224 (1.4 ppm)

PSM Score: 72.49



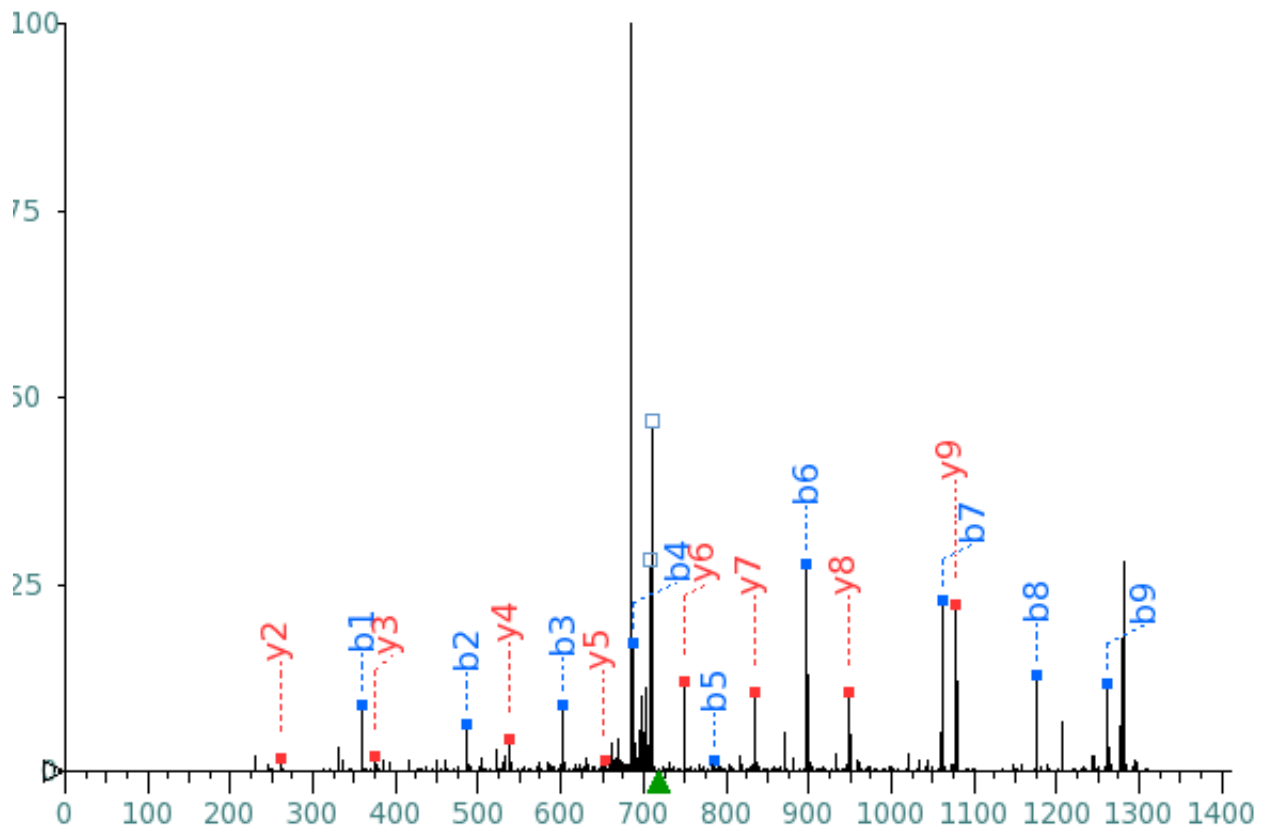

# EQNSPIYISR (+2)

Primary Reference: LIN7A\_HUMAN

Search ID: 75150

Search Name: 20141216\_QLhumanTMT6lowres\_Obj15720\_CETSA\_1203\_Set1\_Fraction\_11

Scan#: 15627

Observed Mass: 718.3905 (-0.3 ppm)

PSM Score: 34.11

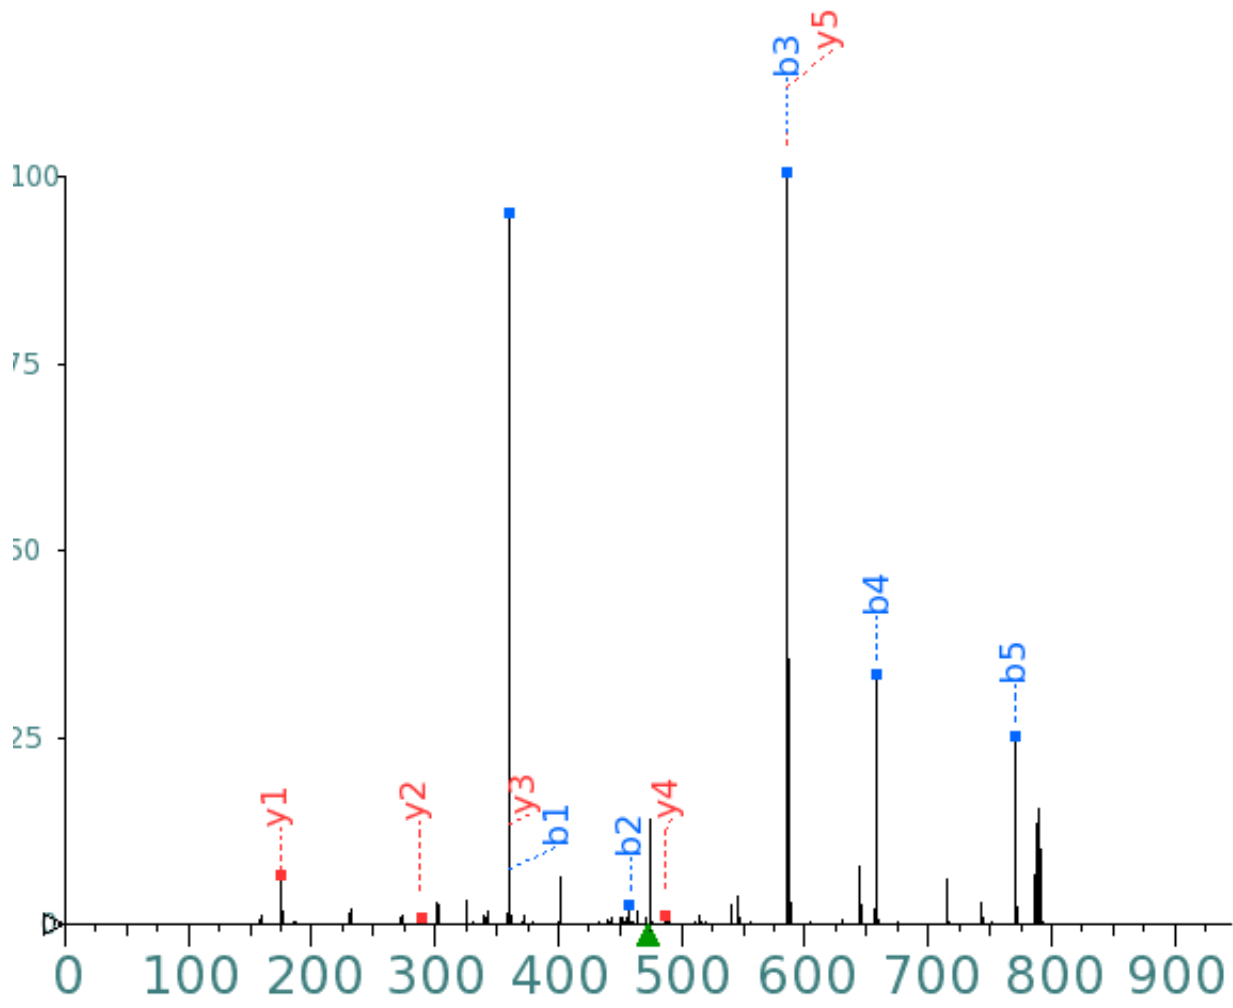

# EVQALR (+2)

Primary Reference: TARA\_HUMAN

Search ID: 75250

Search Name: 20141216\_QLhumanTMT6lowres\_Obj15720\_CETSA\_1203\_Set1\_Fraction\_13

Scan#: 12450

Observed Mass: 472.7902 (0.5 ppm)

PSM Score: 38.99

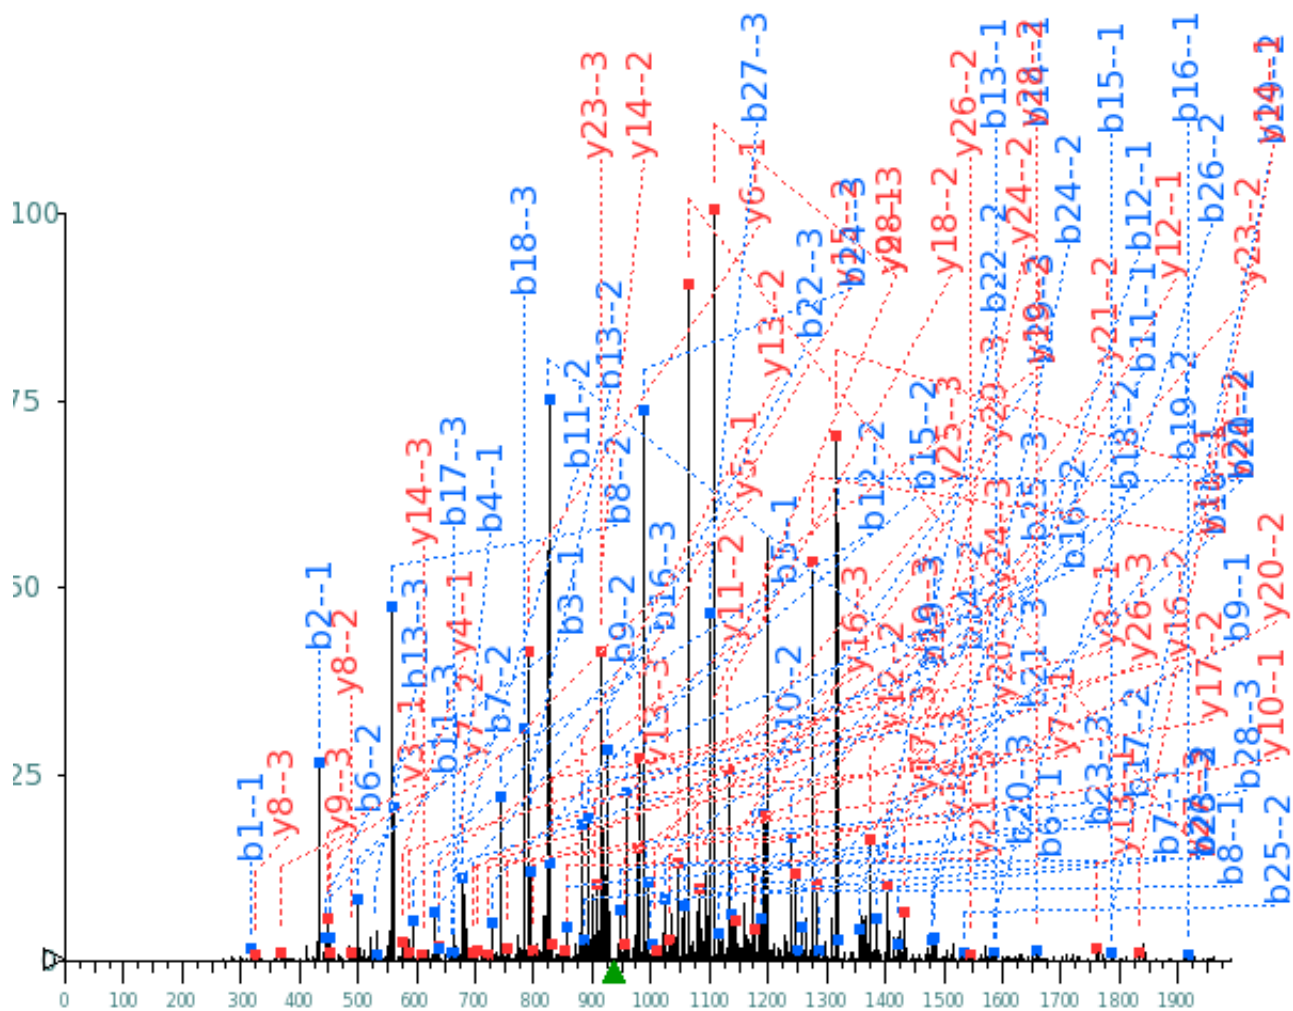

# SDEPARDDAAVETAEAKEPAEADITELCR (+4)

Primary Reference: BL1S2\_HUMAN

Search ID: 75250

Search Name: 20141216\_QLhumanTMT6lowres\_Obj15720\_CETSA\_1203\_Set1\_Fraction\_13

Scan#: 28459

Observed Mass: 937.4563 (-0.9 ppm)

PSM Score: 47.72

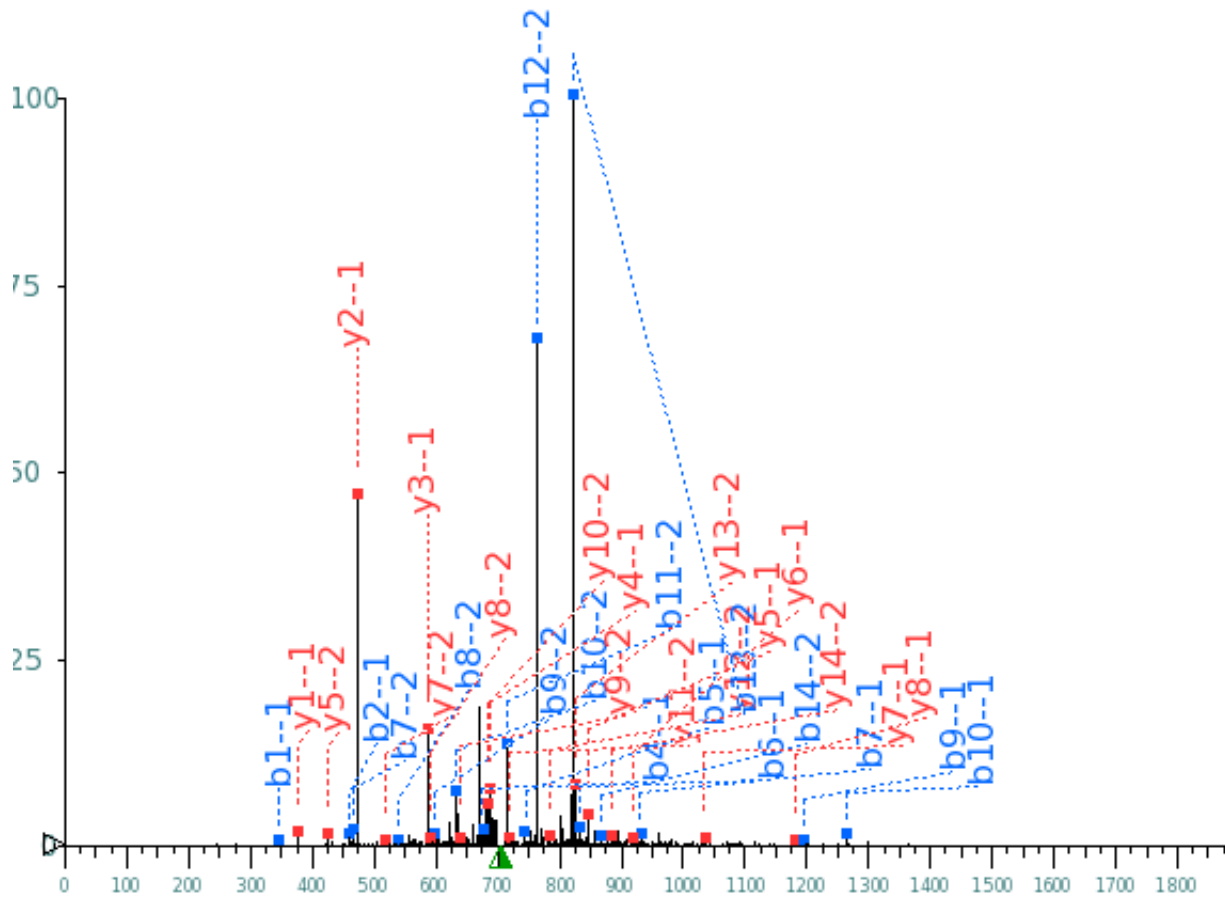

# DISEASVFDAYVLPK (+3)

Primary Reference: RS26\_HUMAN

Search ID: 75250

Search Name: 20141216\_QLhumanTMT6lowres\_Obj15720\_CETSA\_1203\_Set1\_Fraction\_13

Scan#: 37500

Observed Mass: 704.7253 (-0.7 ppm)

PSM Score: 20.32

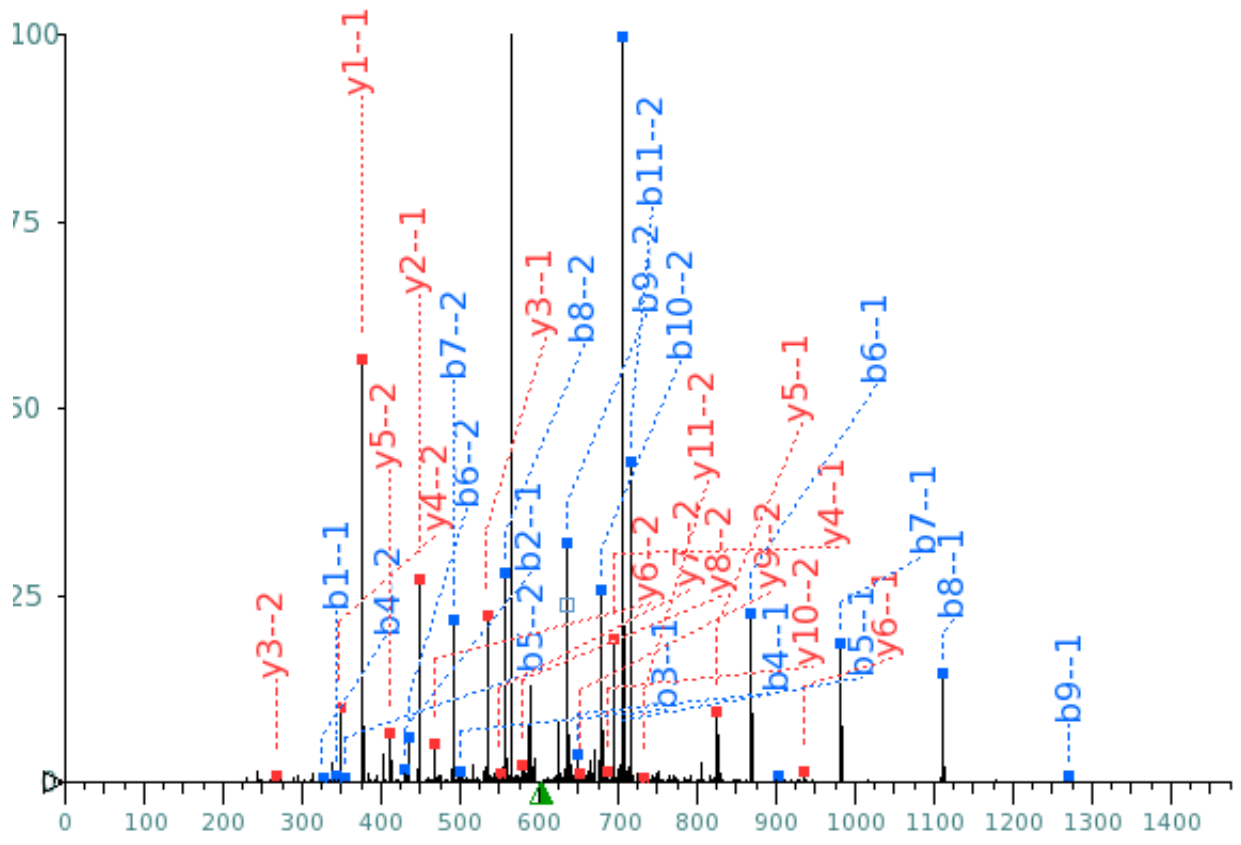

# ISAFGYLECSAK (+3)

Primary Reference: RHOC\_HUMAN

Search ID: 75276

Search Name: 20141216\_QLhumanTMT6lowres\_Obj15720\_CETSA\_1203\_Set1\_Fraction\_14

Scan#: 30938

Observed Mass: 601.9949 (-0.8 ppm)

PSM Score: 23.82

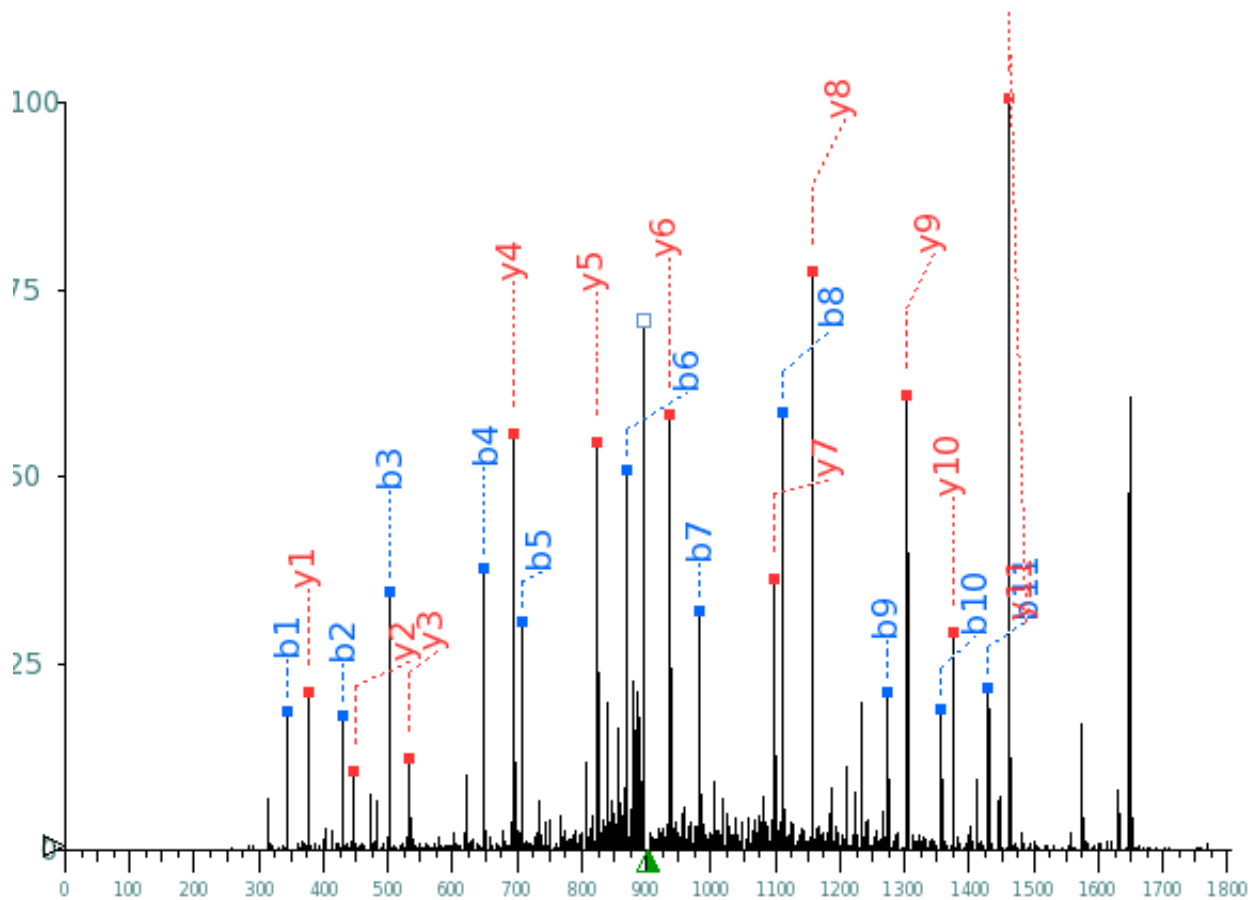

# ISAFGYLECSAK (+2)

Primary Reference: RHOC\_HUMAN

Search ID: 75276

Search Name: 20141216\_QLhumanTMT6lowres\_Obj15720\_CETSA\_1203\_Set1\_Fraction\_14

Scan#: 30940

Observed Mass: 902.4884 (-1.2 ppm)

PSM Score: 53.55

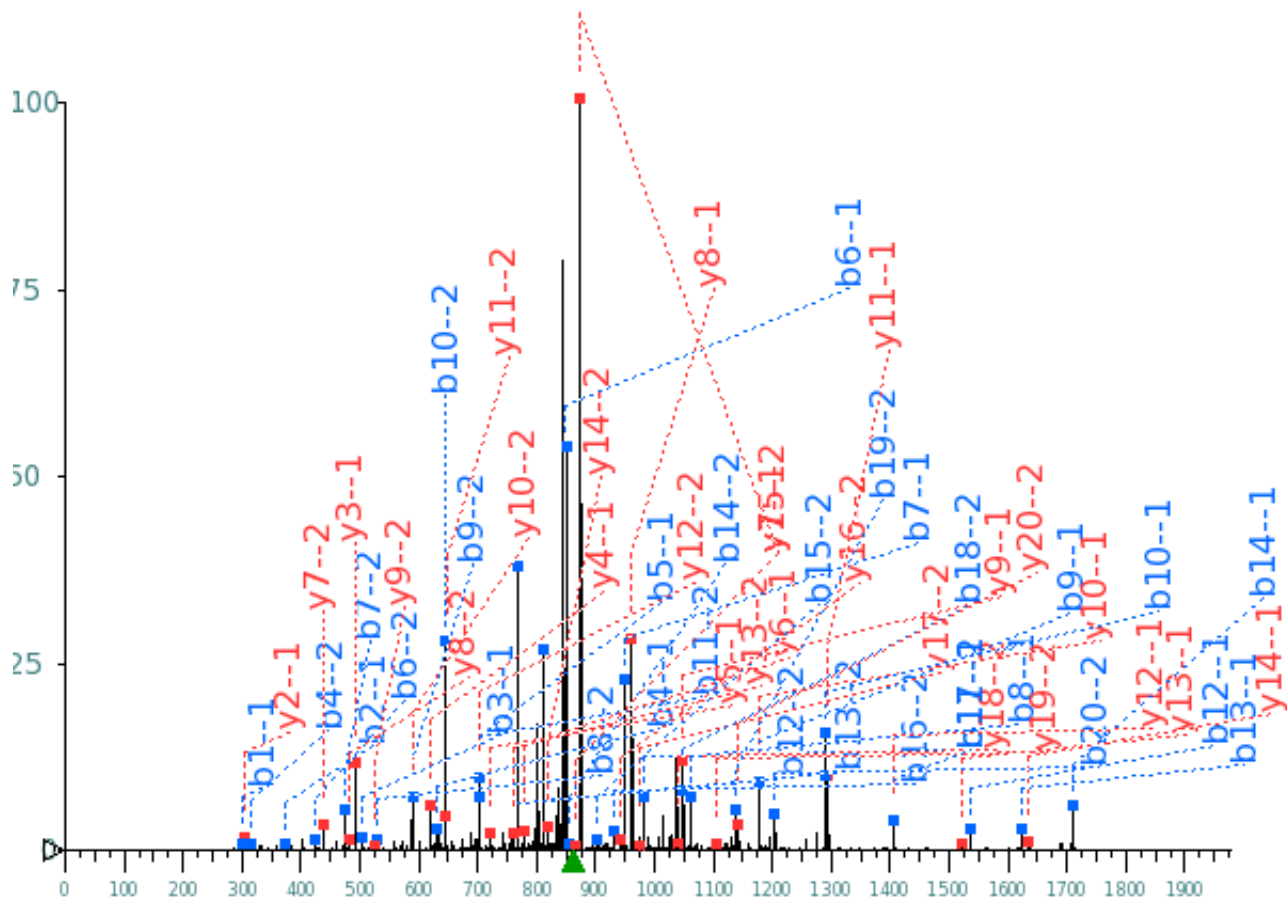

# AAEEAFVNDIDESSPGTEWER (+3)

Primary Reference: F5H6N3\_HUMAN

Search ID: 75276

Search Name: 20141216\_QLhumanTMT6lowres\_Obj15720\_CETSA\_1203\_Set1\_Fraction\_14

Scan#: 32687

Observed Mass: 861.0689 (1.2 ppm)

PSM Score: 59.41

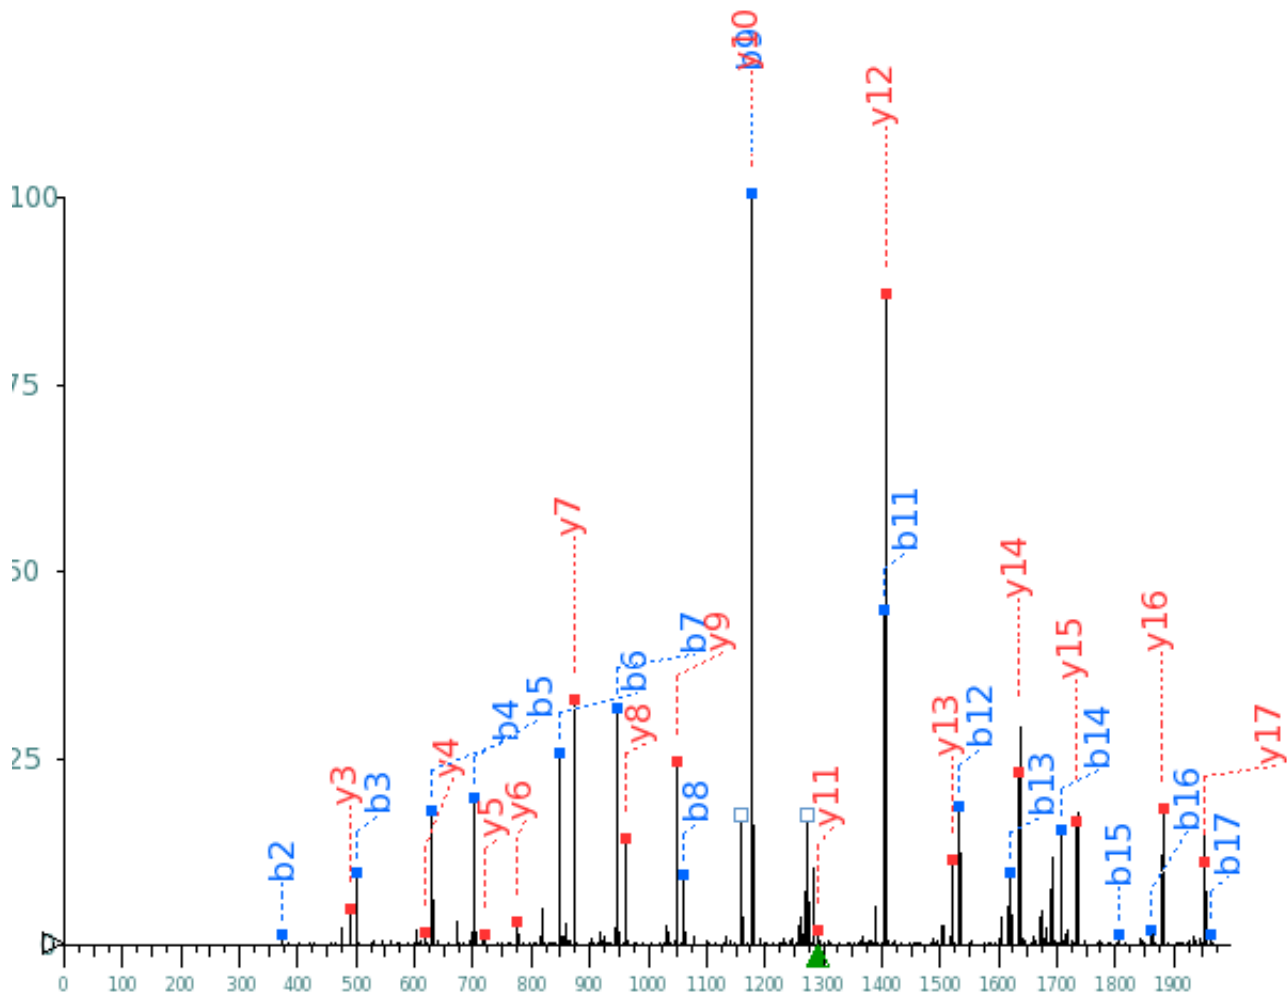

# AAEEAFVNDIDESSPGTEWER (+2)

Primary Reference: F5H6N3\_HUMAN

Search ID: 75276

Search Name: 20141216\_QLhumanTMT6lowres\_Obj15720\_CETSA\_1203\_Set1\_Fraction\_14

Scan#: 32714

Observed Mass: 1291.0969 (-1 ppm)

PSM Score: 79.64



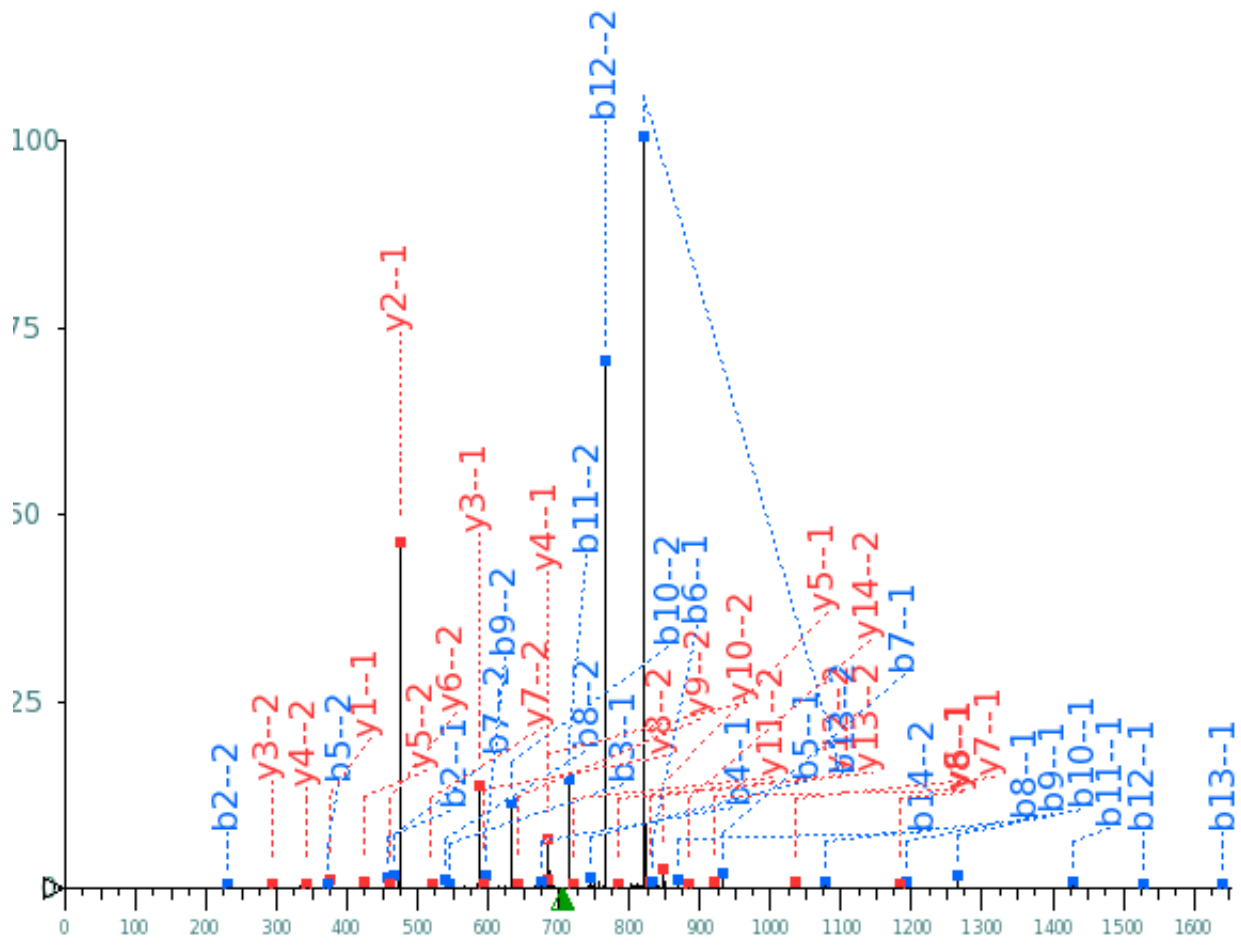

# DISEASVFDAYVLPK (+3)

Primary Reference: RS26\_HUMAN

Search ID: 75276

Search Name: 20141216\_QLhumanTMT6lowres\_Obj15720\_CETSA\_1203\_Set1\_Fraction\_14

Scan#: 37280

Observed Mass: 704.7263 (0.7 ppm)

PSM Score: 42.26

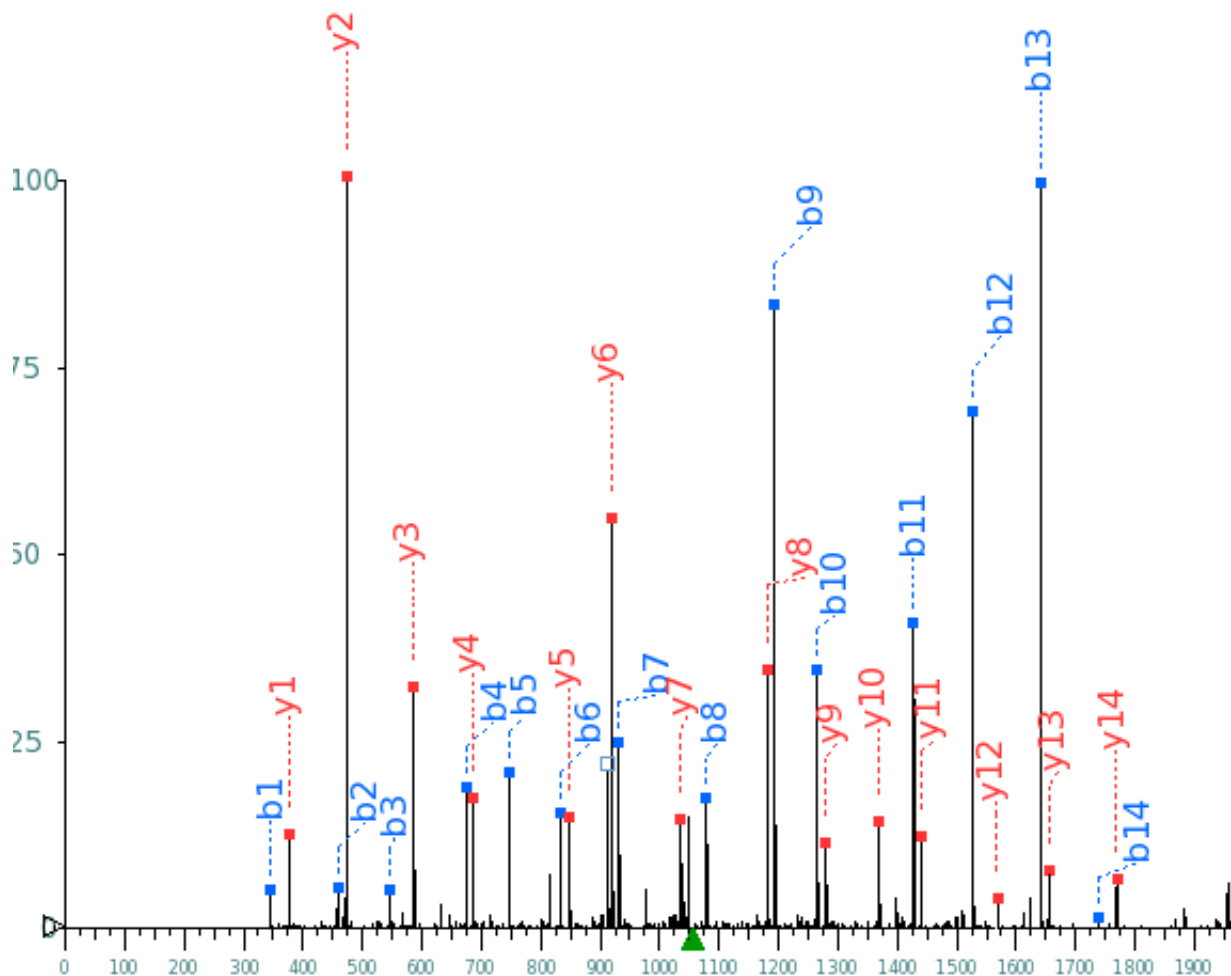

# DISEASVFDAYVLPK (+2)

Primary Reference: RS26\_HUMAN

Search ID: 75276

Search Name: 20141216\_QLhumanTMT6lowres\_Obj15720\_CETSA\_1203\_Set1\_Fraction\_14

Scan#: 37328

Observed Mass: 1056.5846 (-0.4 ppm)

PSM Score: 78.46

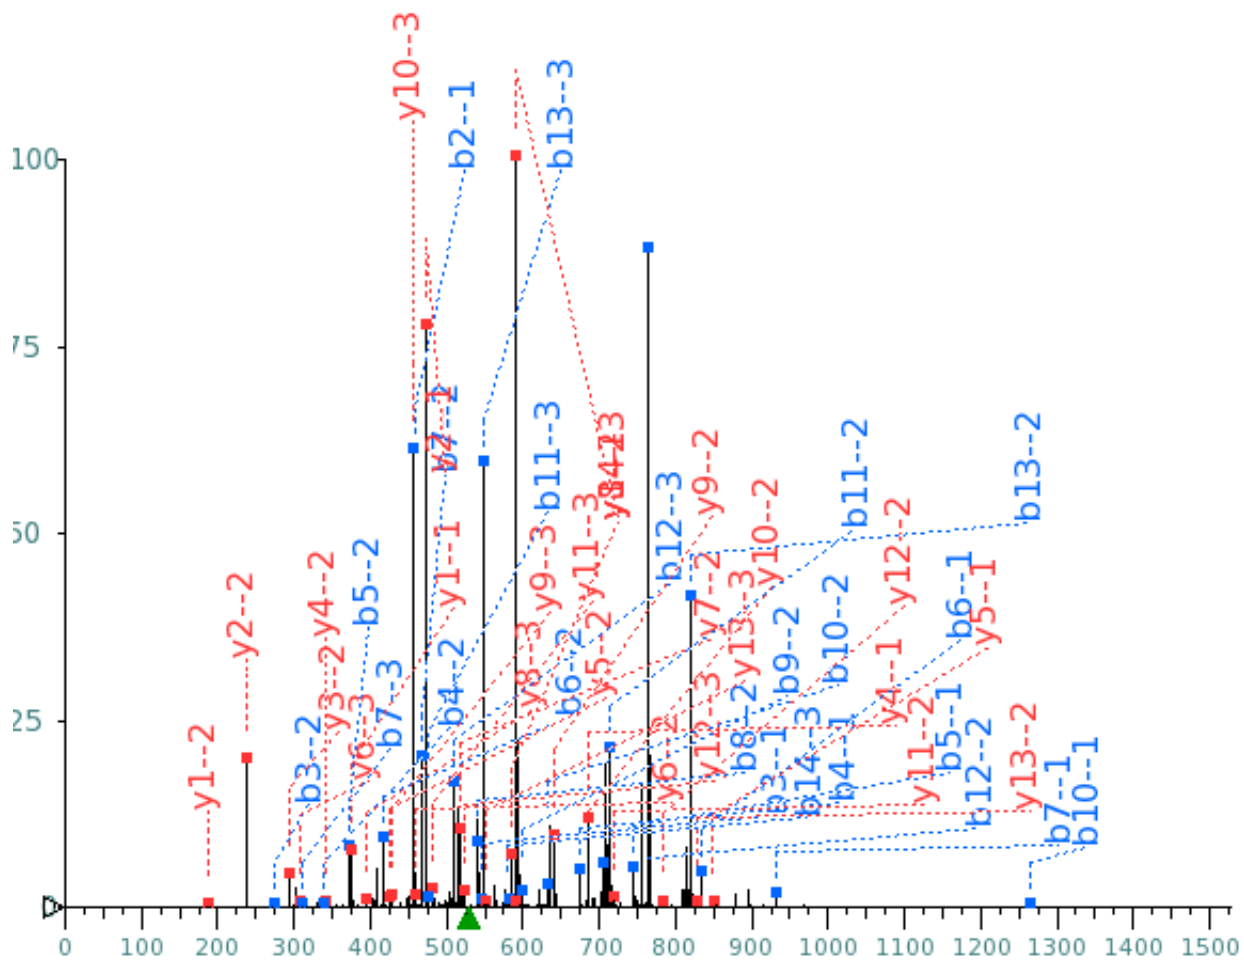

# DISEASVFDAYVLPK (+4)

Primary Reference: RS26\_HUMAN

Search ID: 75276

Search Name: 20141216\_QLhumanTMT6lowres\_Obj15720\_CETSA\_1203\_Set1\_Fraction\_14

Scan#: 37364

Observed Mass: 528.7957 (-0.8 ppm)

PSM Score: 24.12

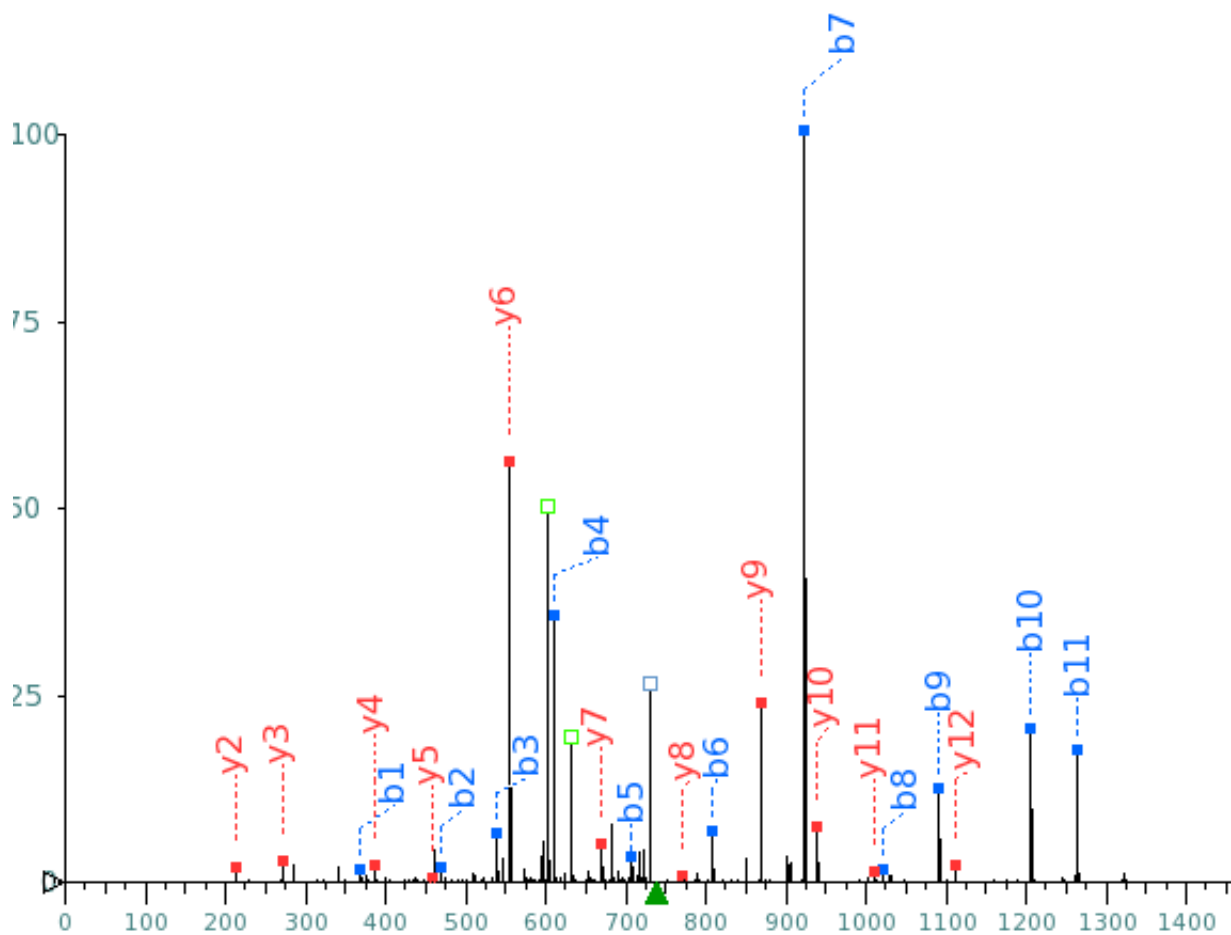

# HTAAPTDPADGPV (+2)

Primary Reference: PLP2\_HUMAN

Search ID: 75278

Search Name: 20141216\_QLhumanTMT6lowres\_Obj15720\_CETSA\_1203\_Set1\_Fraction\_15

Scan#: 13102

Observed Mass: 739.3778 (-0.2 ppm)

PSM Score: 63.59

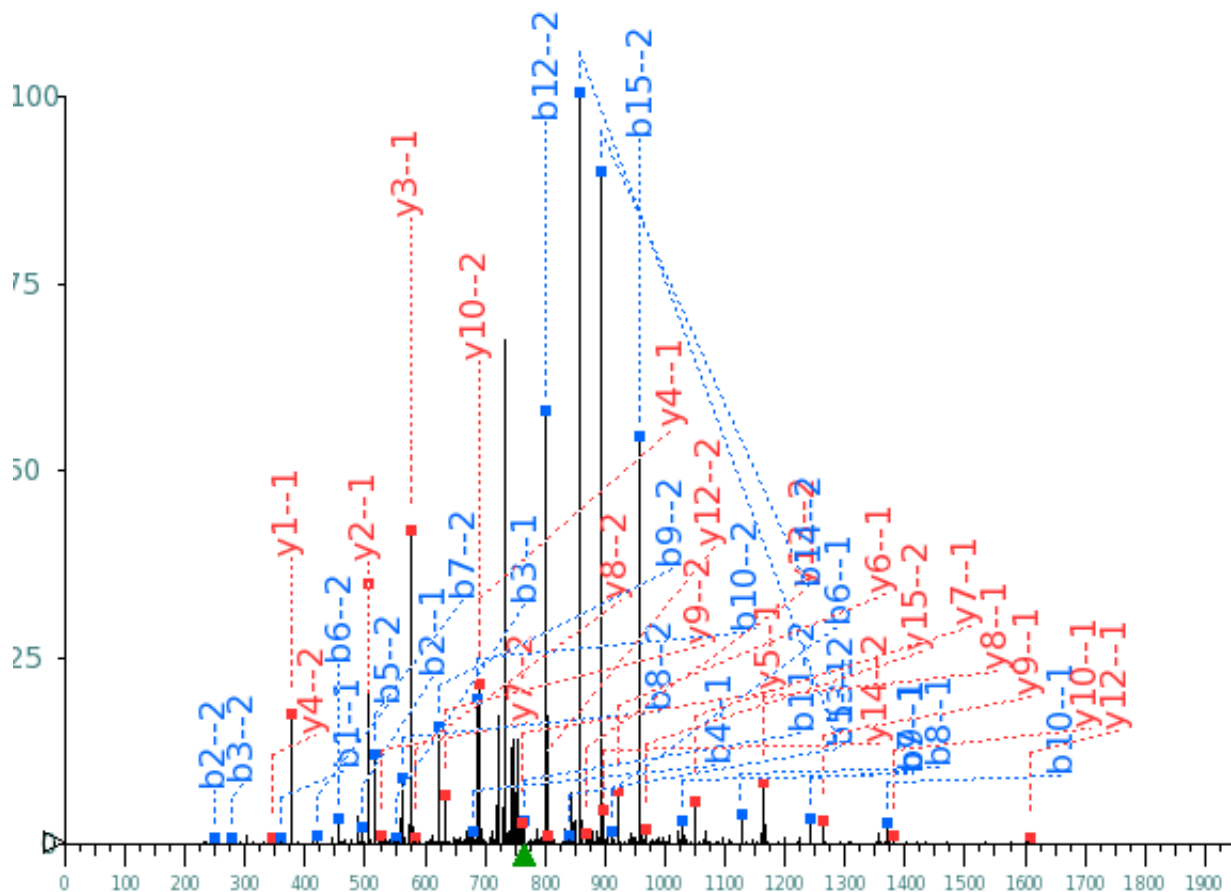

# EHGQCADVDECALAEK (+3)

Primary Reference: Q659B4\_HUMAN

Search ID: 75278

Search Name: 20141216\_QLhumanTMT6lowres\_Obj15720\_CETSA\_1203\_Set1\_Fraction\_15

Scan#: 16487

Observed Mass: 764.0331 (0.1 ppm)

PSM Score: 47.27

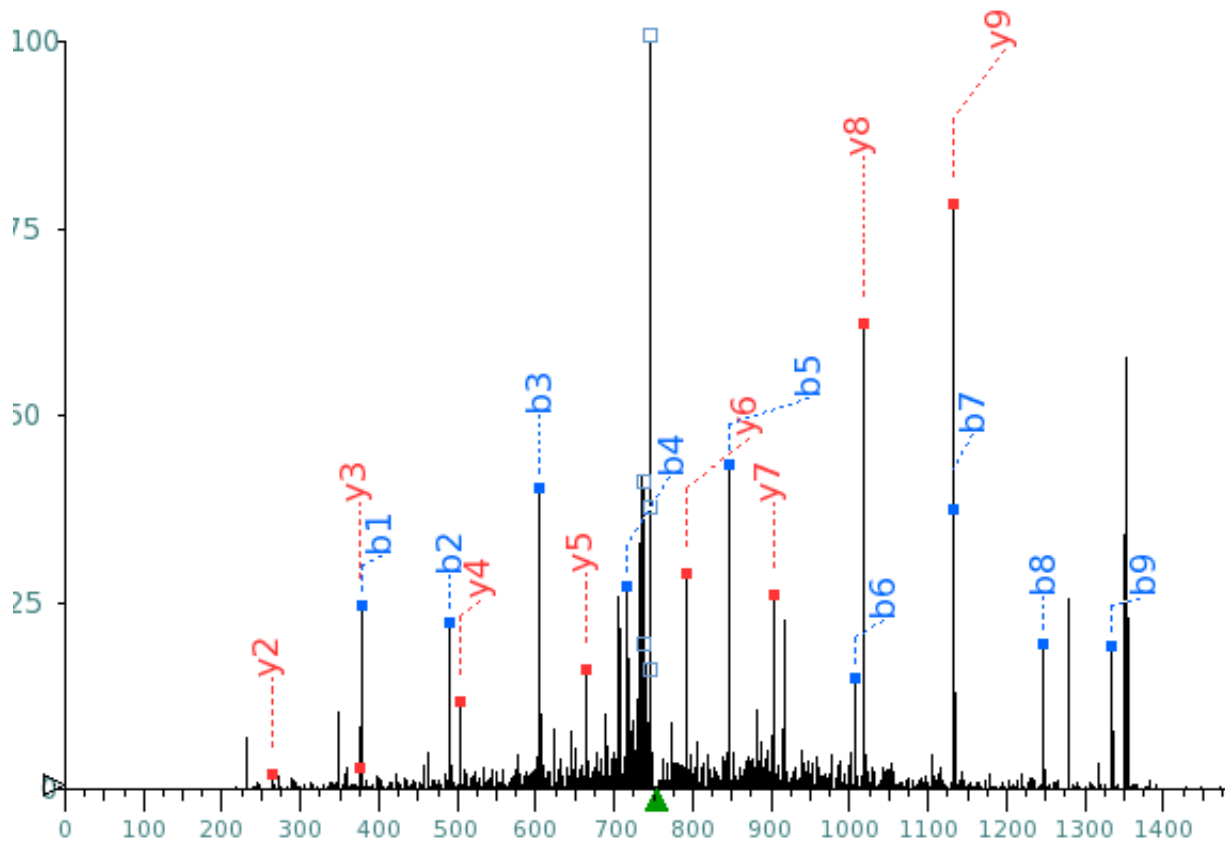

# FLNIQCQLSR (+2)

Primary Reference: ERI1\_HUMAN

Search ID: 75278

Search Name: 20141216\_QLhumanTMT6lowres\_Obj15720\_CETSA\_1203\_Set1\_Fraction\_15

Scan#: 27285

Observed Mass: 754.4166 (0.5 ppm)

PSM Score: 39.52

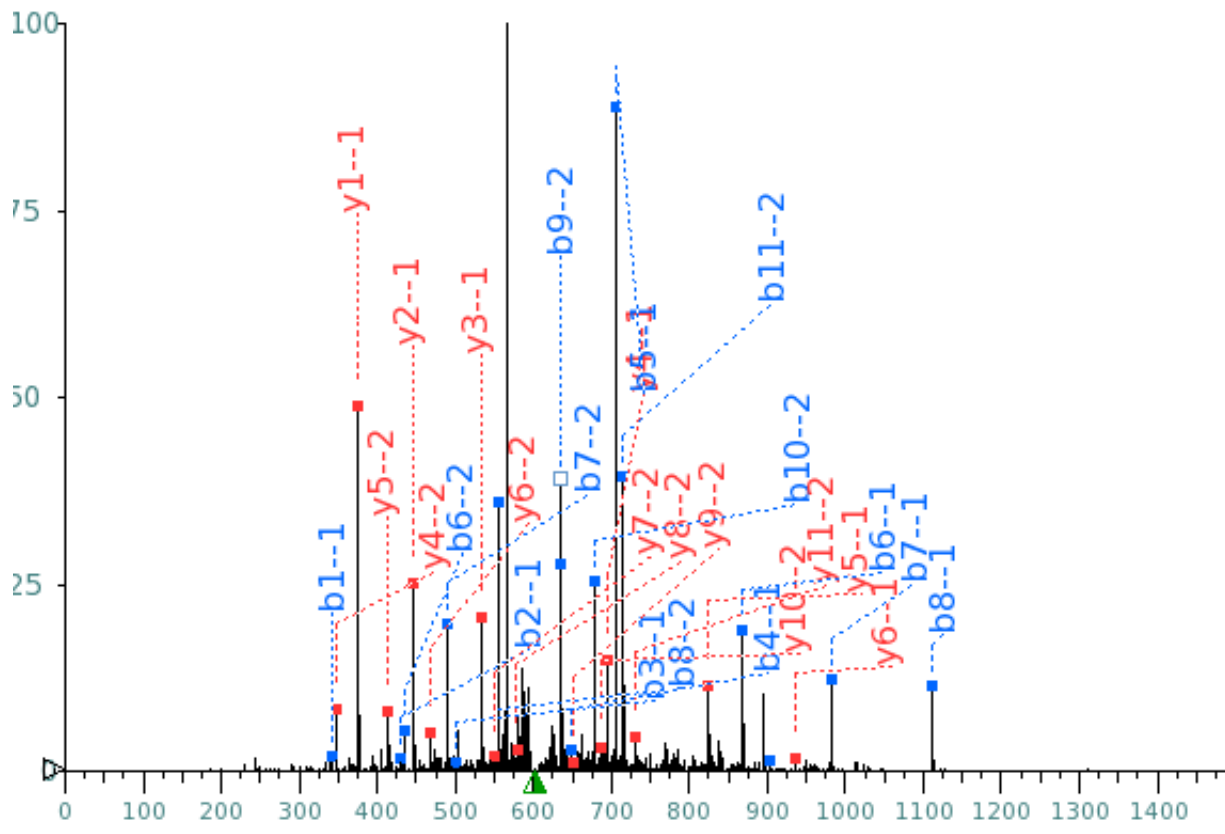

# ISAFGYLECSAK (+3)

Primary Reference: RHOC\_HUMAN

Search ID: 75278

Search Name: 20141216\_QLhumanTMT6lowres\_Obj15720\_CETSA\_1203\_Set1\_Fraction\_15

Scan#: 30912

Observed Mass: 601.9957 (0.6 ppm)

PSM Score: 16.79

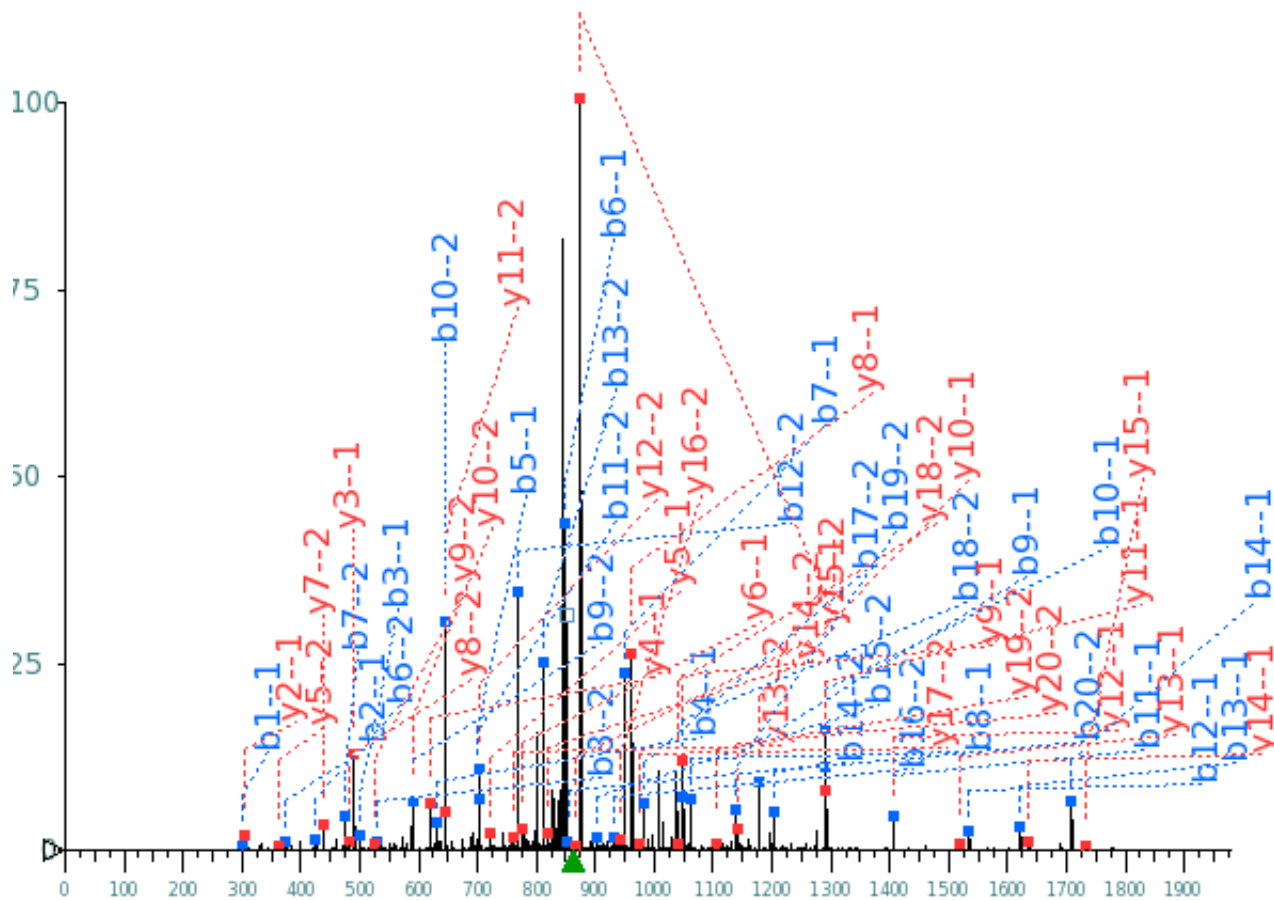

# AAEEAFVNDIDESSPGTEWER (+3)

Primary Reference: F5H6N3\_HUMAN

Search ID: 75278

Search Name: 20141216\_QLhumanTMT6lowres\_Obj15720\_CETSA\_1203\_Set1\_Fraction\_15

Scan#: 32713

Observed Mass: 861.068 (0.1 ppm)

PSM Score: 61.34



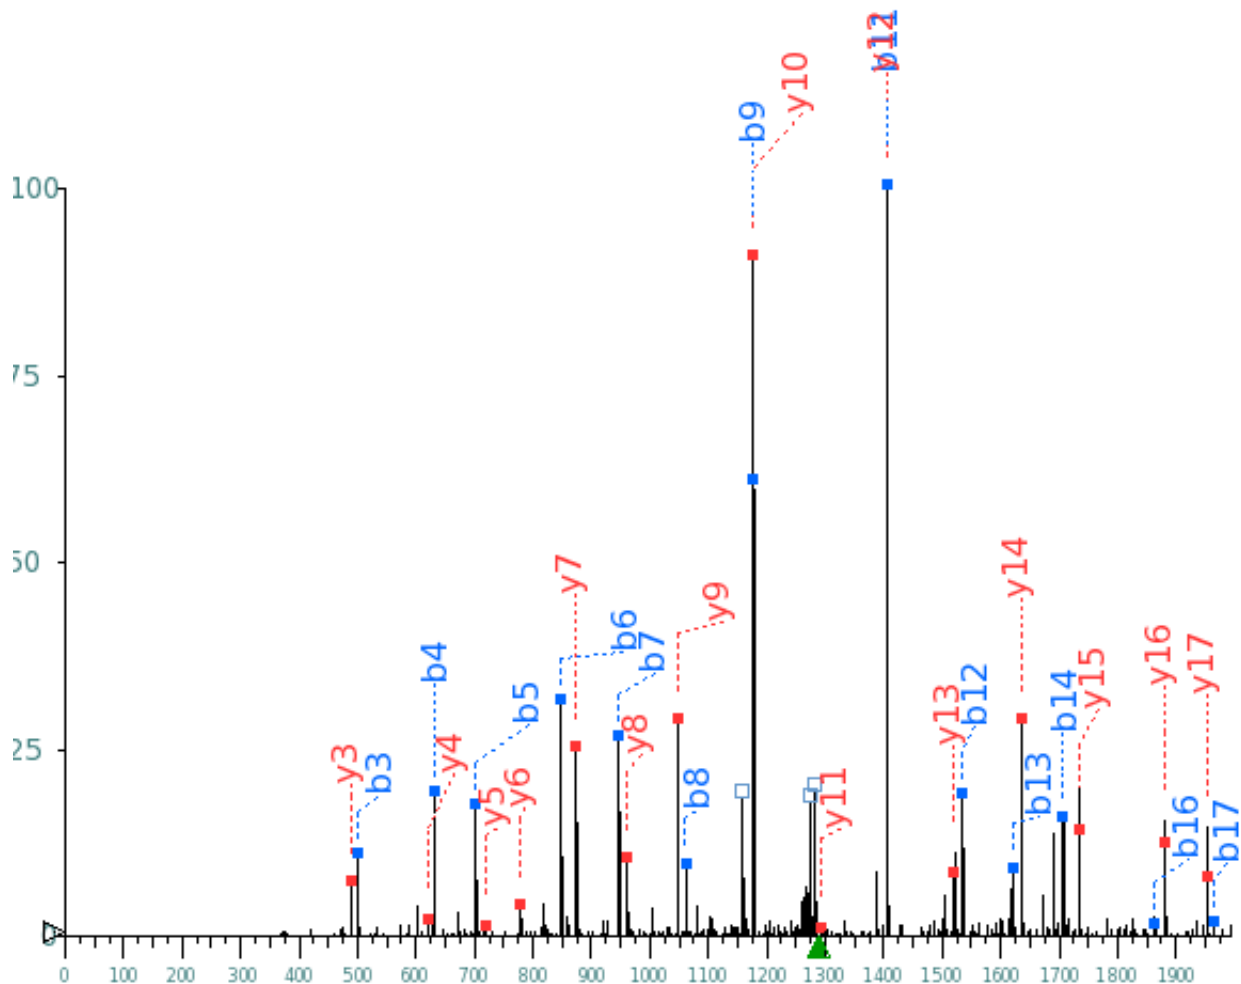

# AAEEAFVNDIDESSPGTEWER (+2)

Primary Reference: F5H6N3\_HUMAN

Search ID: 75278

Search Name: 20141216\_QLhumanTMT6lowres\_Obj15720\_CETSA\_1203\_Set1\_Fraction\_15

Scan#: 32734

Observed Mass: 1291.0979 (-0.2 ppm)

PSM Score: 51.52

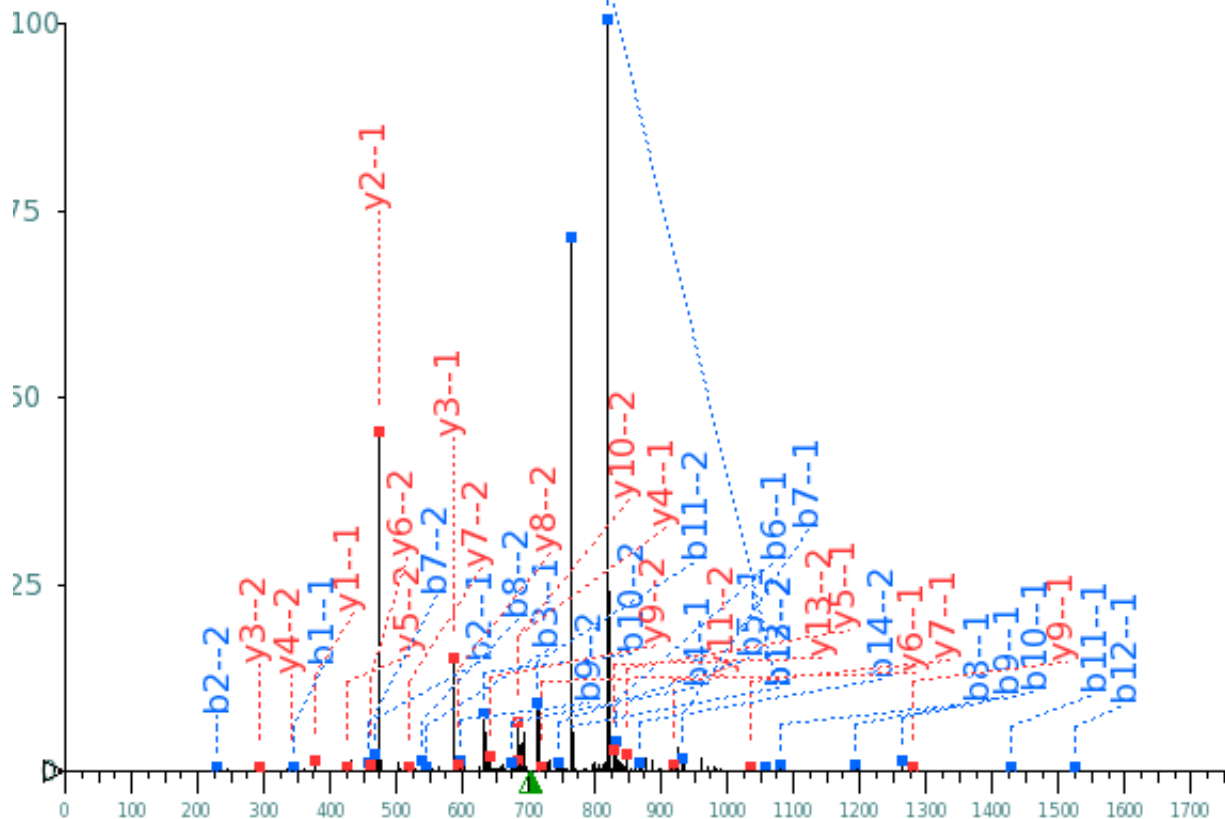

# DISEASVFDAYVLPK (+3)

Primary Reference: RS26\_HUMAN

Search ID: 75278

Search Name: 20141216\_QLhumanTMT6lowres\_Obj15720\_CETSA\_1203\_Set1\_Fraction\_15

Scan#: 37296

Observed Mass: 704.7255 (-0.5 ppm)

PSM Score: 24.39

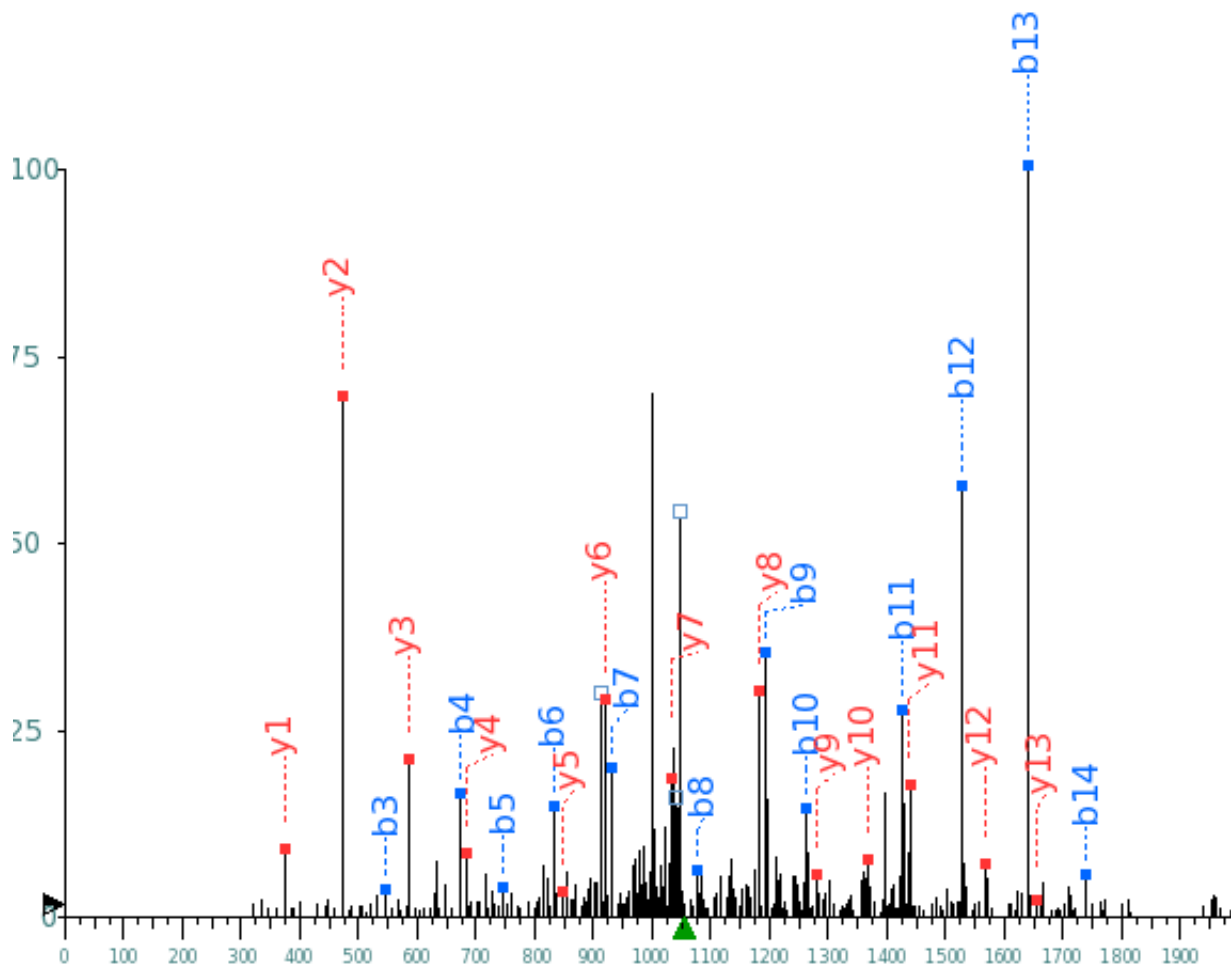

# DISEASVFDAYVLPK (+2)

Primary Reference: RS26\_HUMAN

Search ID: 75278

Search Name: 20141216\_QLhumanTMT6lowres\_Obj15720\_CETSA\_1203\_Set1\_Fraction\_15

Scan#: 37304

Observed Mass: 1056.5846 (-0.5 ppm)

PSM Score: 54.94

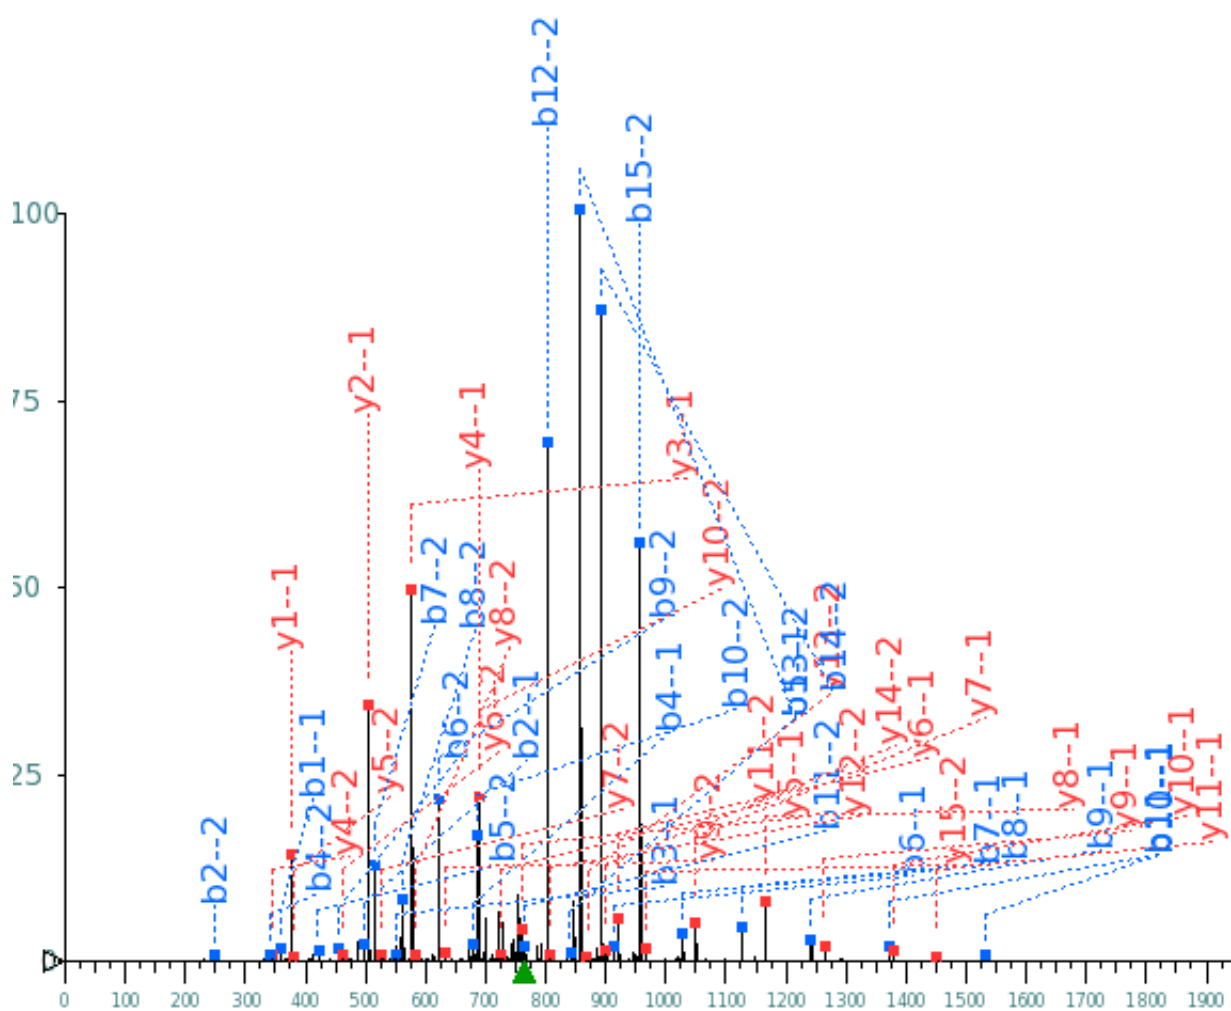

# EHGQCADVDECALAEK (+3)

Primary Reference: Q659B4\_HUMAN

Search ID: 75279

Search Name: 20141216\_QLhumanTMT6lowres\_Obj15720\_CETSA\_1203\_Set1\_Fraction\_16

Scan#: 16216

Observed Mass: 764.0339 (1.2 ppm)

PSM Score: 45.46

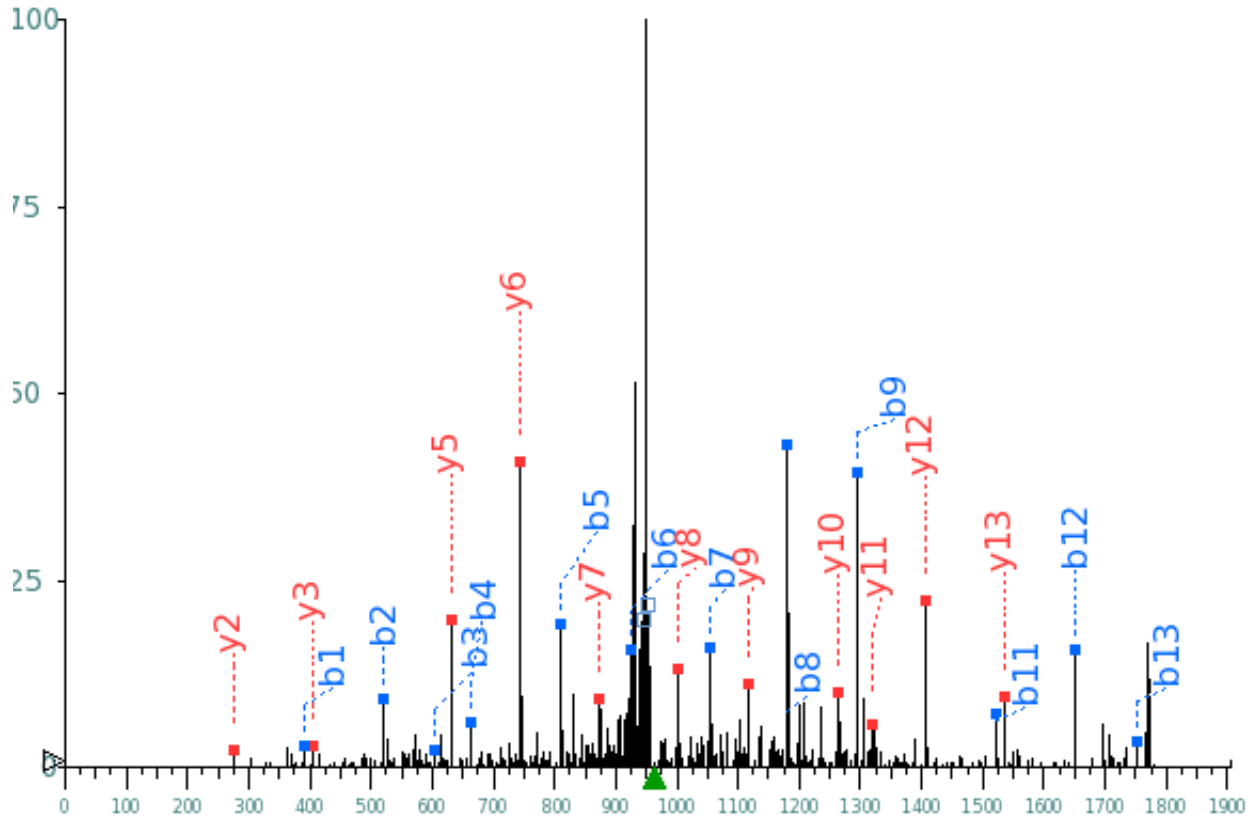

# CESGFIEELPEETR (+2)

Primary Reference: RN126\_HUMAN

Search ID: 75279

Search Name: 20141216\_QLhumanTMT6lowres\_Obj15720\_CETSA\_1203\_Set1\_Fraction\_16

Scan#: 25699

Observed Mass: 962.9618 (0.2 ppm)

PSM Score: 43.67

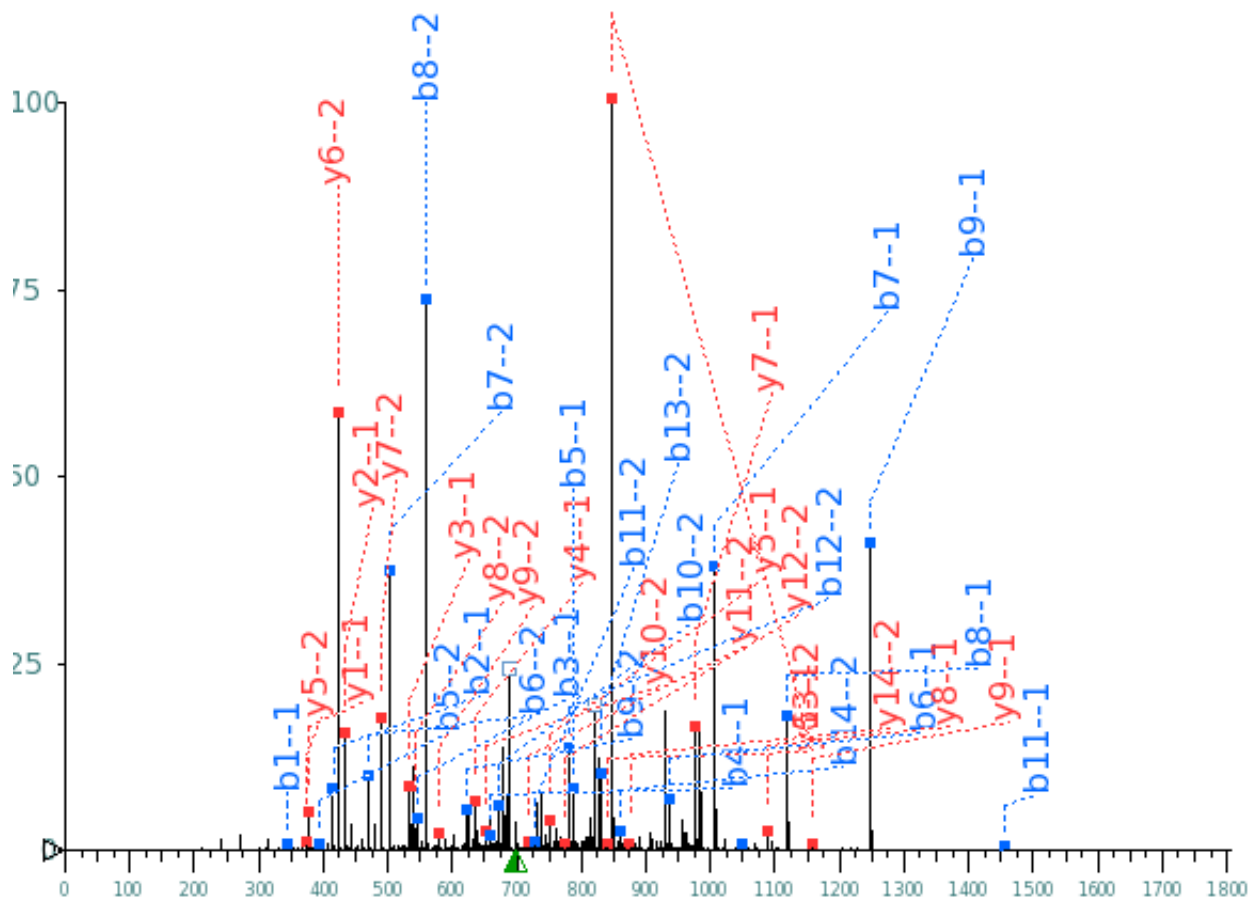

# DAELEFAIQPNTTGK (+3)

Primary Reference: E9PNV3\_HUMAN

Search ID: 75279

Search Name: 20141216\_QLhumanTMT6lowres\_Obj15720\_CETSA\_1203\_Set1\_Fraction\_16

Scan#: 28108

Observed Mass: 698.0493 (0.3 ppm)

PSM Score: 23.75

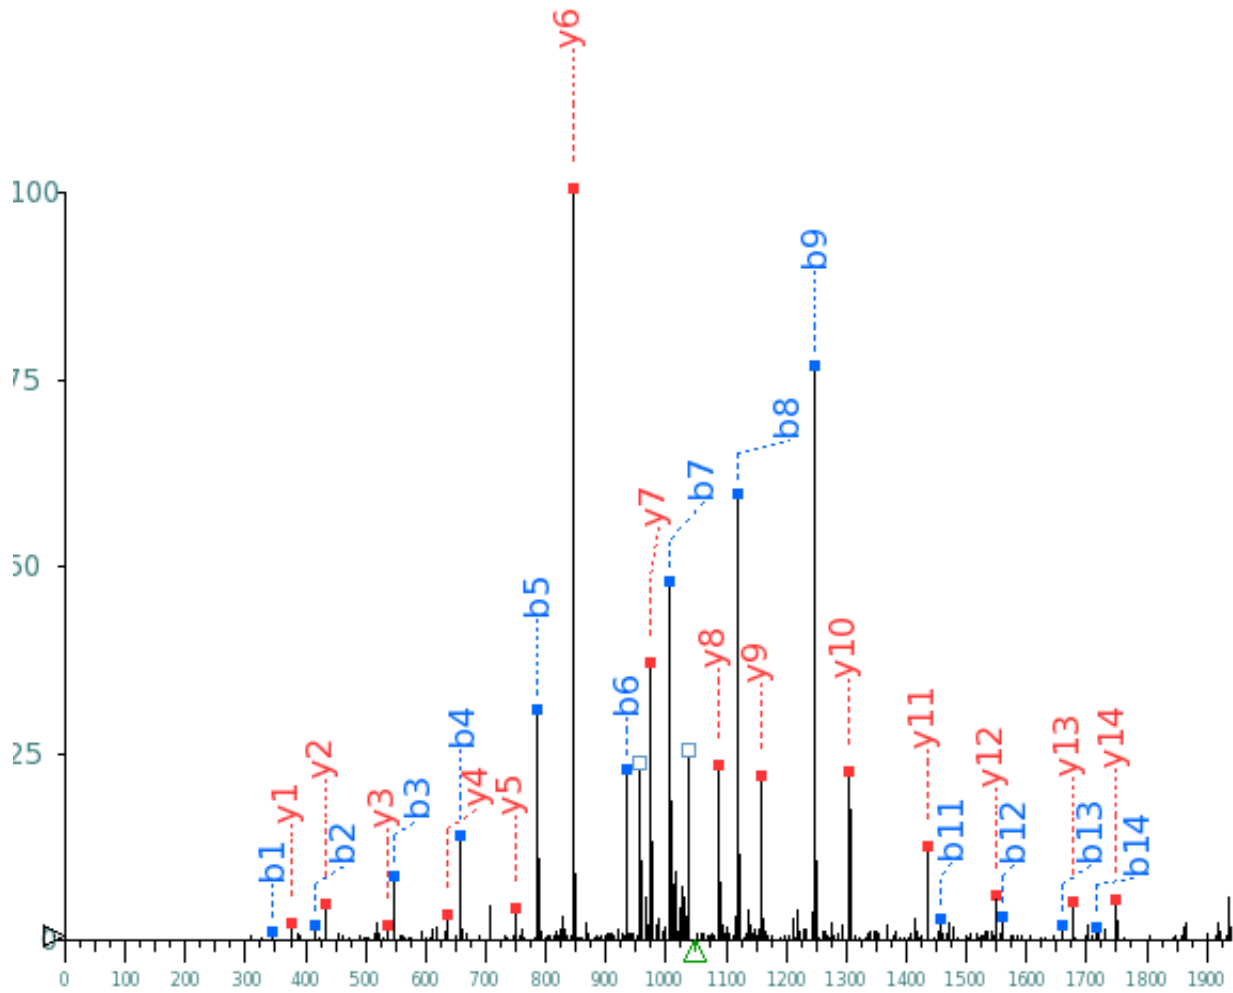

# DAELEFAIQPNTTGK (+2)

Primary Reference: E9PNV3\_HUMAN

Search ID: 75279

Search Name: 20141216\_QLhumanTMT6lowres\_Obj15720\_CETSA\_1203\_Set1\_Fraction\_16

Scan#: 28138

Observed Mass: 1046.5702 (0.3 ppm)

PSM Score: 76.27

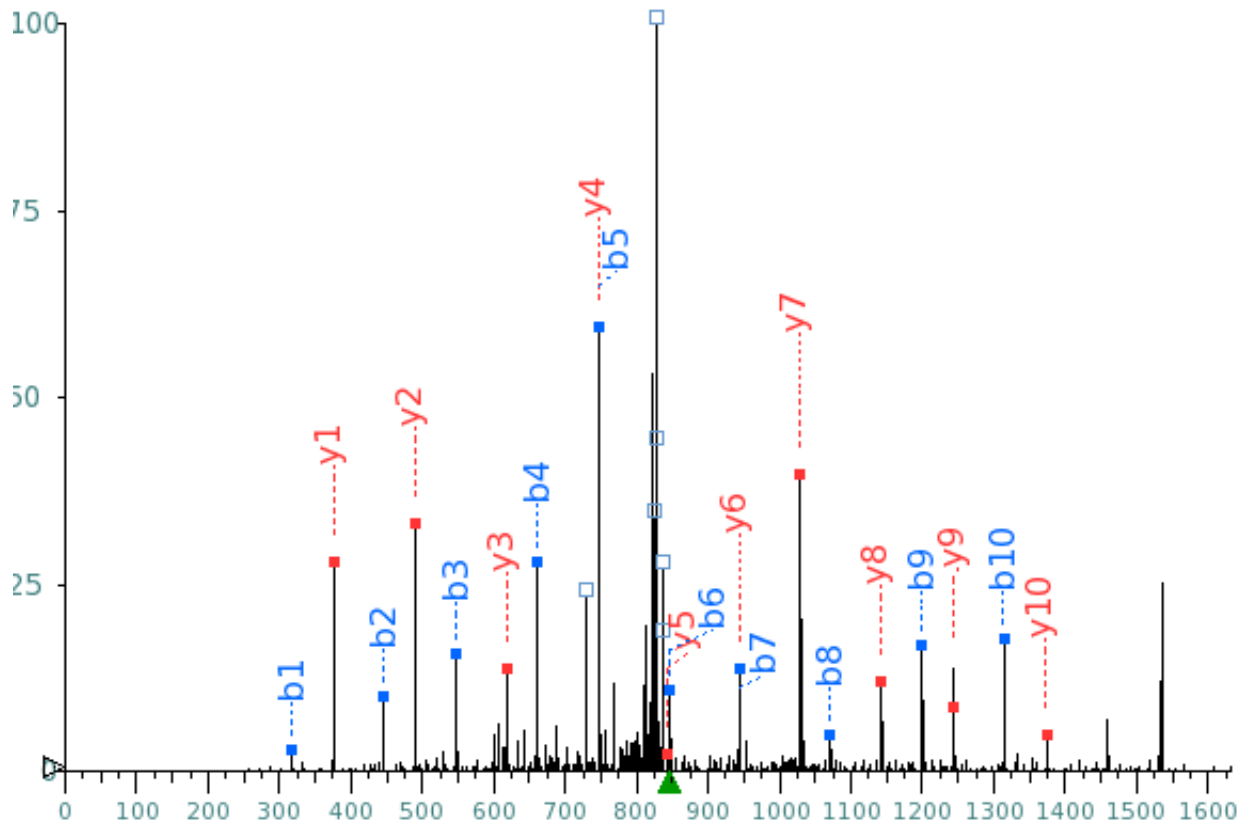

# SETISVPQEIK (+2)

Primary Reference: MOC2A\_HUMAN

Search ID: 75280

Search Name: 20141216\_QLhumanTMT6lowres\_Obj15720\_CETSA\_1203\_Set2\_Fraction\_01

Scan#: 22031

Observed Mass: 844.9962 (0.9 ppm)

PSM Score: 56.1



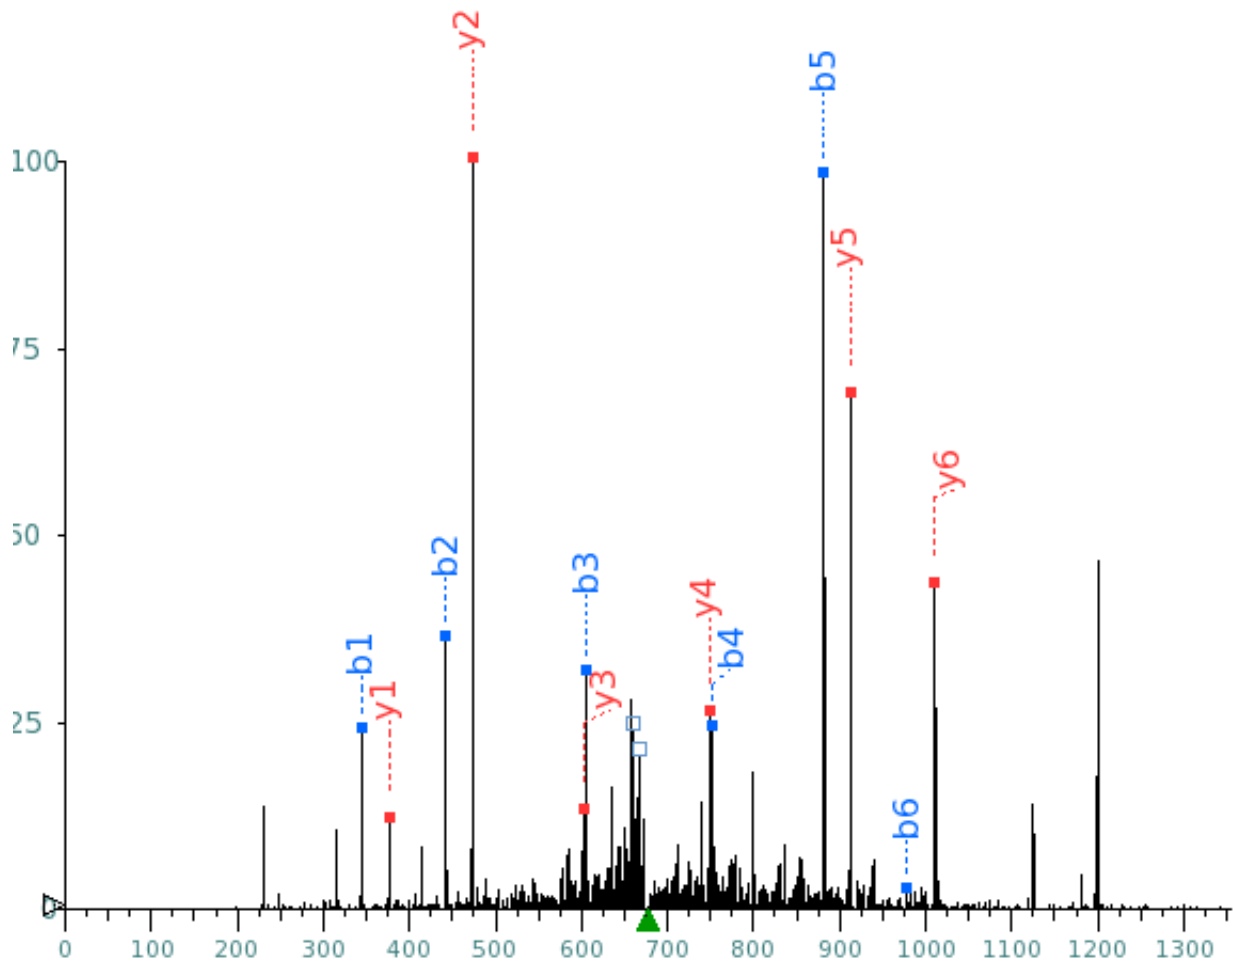

# LVIYFEPK (+2)

Primary Reference: PANK1\_HUMAN

Search ID: 75280

Search Name: 20141216\_QLhumanTMT6lowres\_Obj15720\_CETSA\_1203\_Set2\_Fraction\_01

Scan#: 26531

Observed Mass: 677.4124 (-0.6 ppm)

PSM Score: 26.97

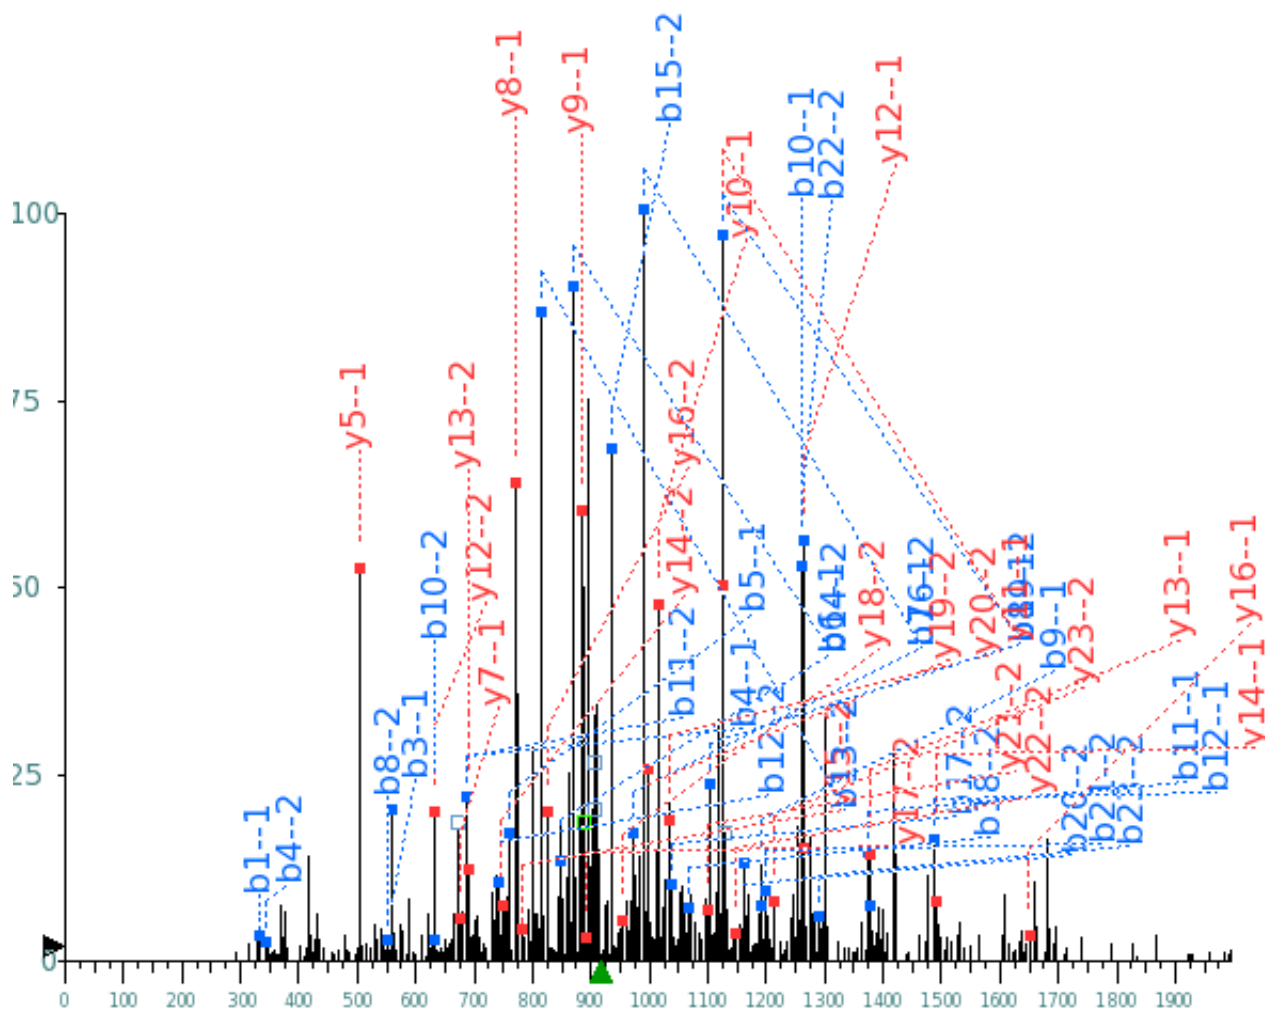

# TQVEASEESALNHLQNP GDAAEGR (+3)

Primary Reference: MOFA1\_HUMAN

Search ID: 75281

Search Name: 20141216\_QLhumanTMT6lowres\_Obj15720\_CETSA\_1203\_Set2\_Fraction\_02

Scan#: 22507

Observed Mass: 918.1167 (0.7 ppm)

PSM Score: 24.24

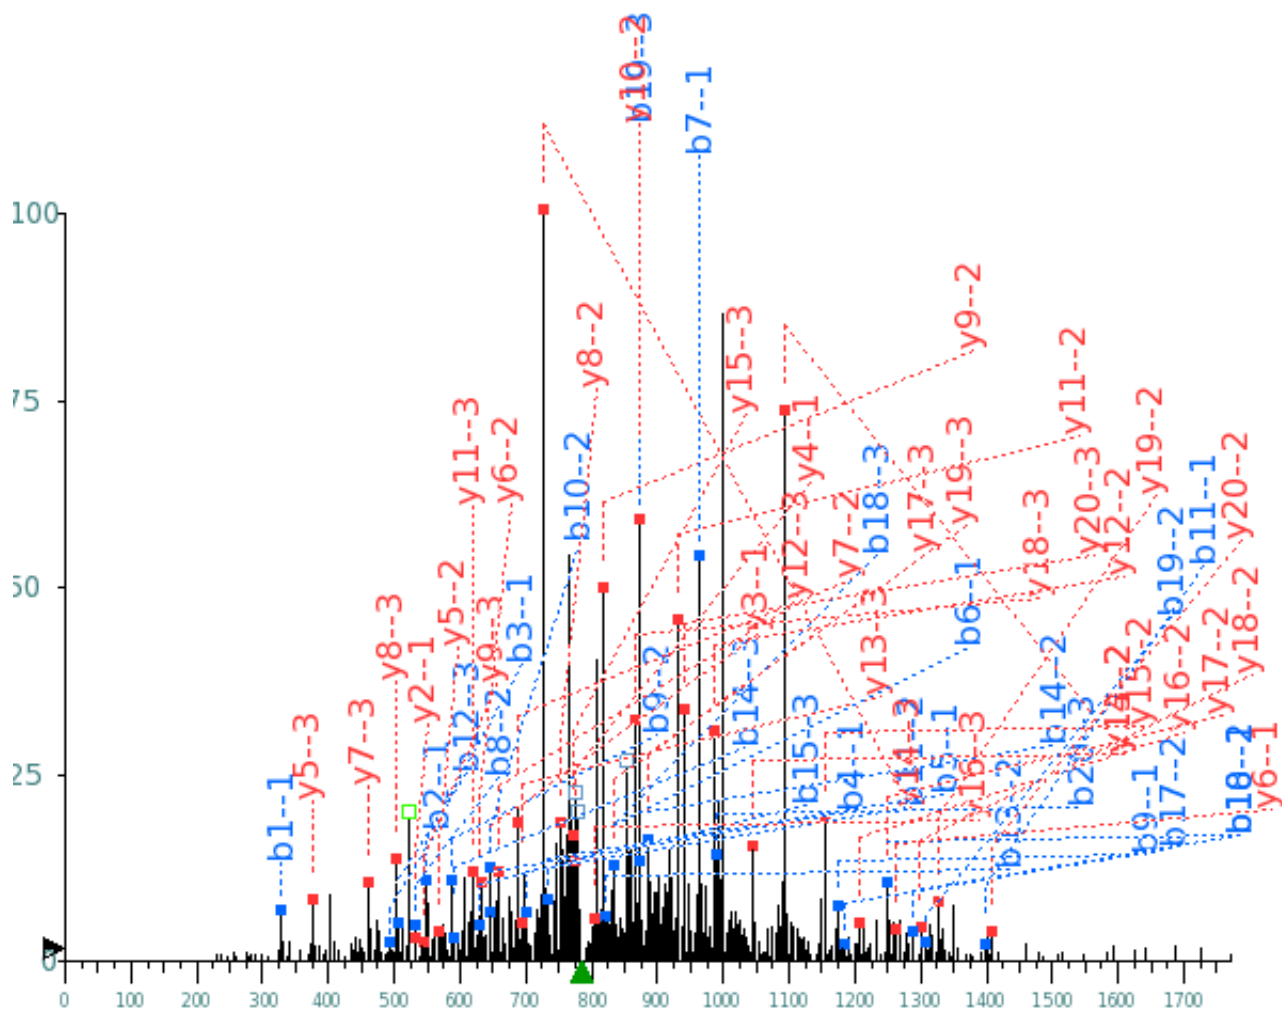

# VYGPSTPELLLEEKENKR (+4)

Primary Reference: N4BP1\_HUMAN

Search ID: 75281

Search Name: 20141216\_QLhumanTMT6lowres\_Obj15720\_CETSA\_1203\_Set2\_Fraction\_02

Scan#: 37465

Observed Mass: 786.9588 (0.3 ppm)

PSM Score: 50.24

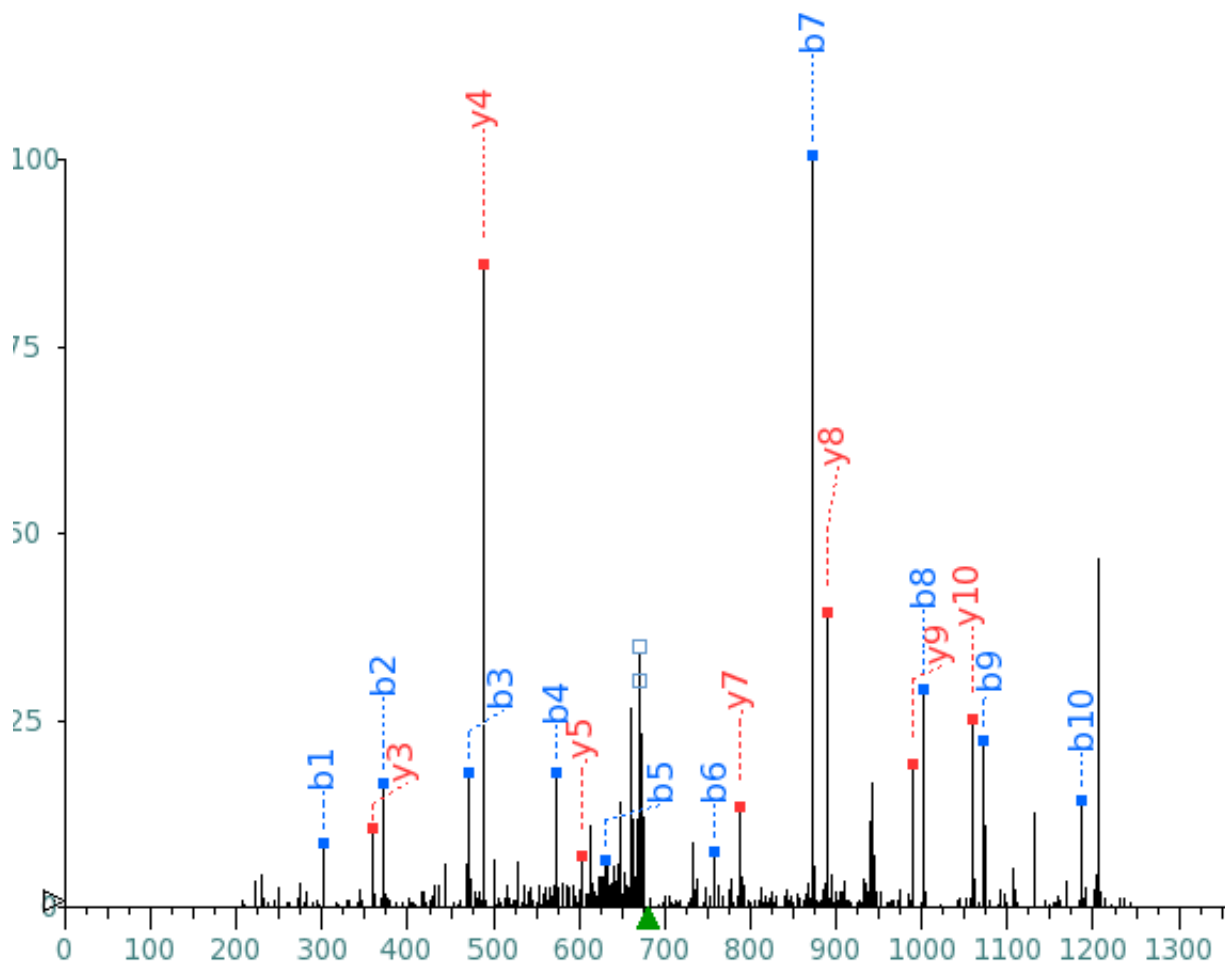

# AAVTGQDEAIR (+2)

Primary Reference: ANR16\_HUMAN

Search ID: 75282

Search Name: 20141216\_QLhumanTMT6lowres\_Obj15720\_CETSA\_1203\_Set2\_Fraction\_03

Scan#: 11878

Observed Mass: 680.376 (1.3 ppm)

PSM Score: 51.43

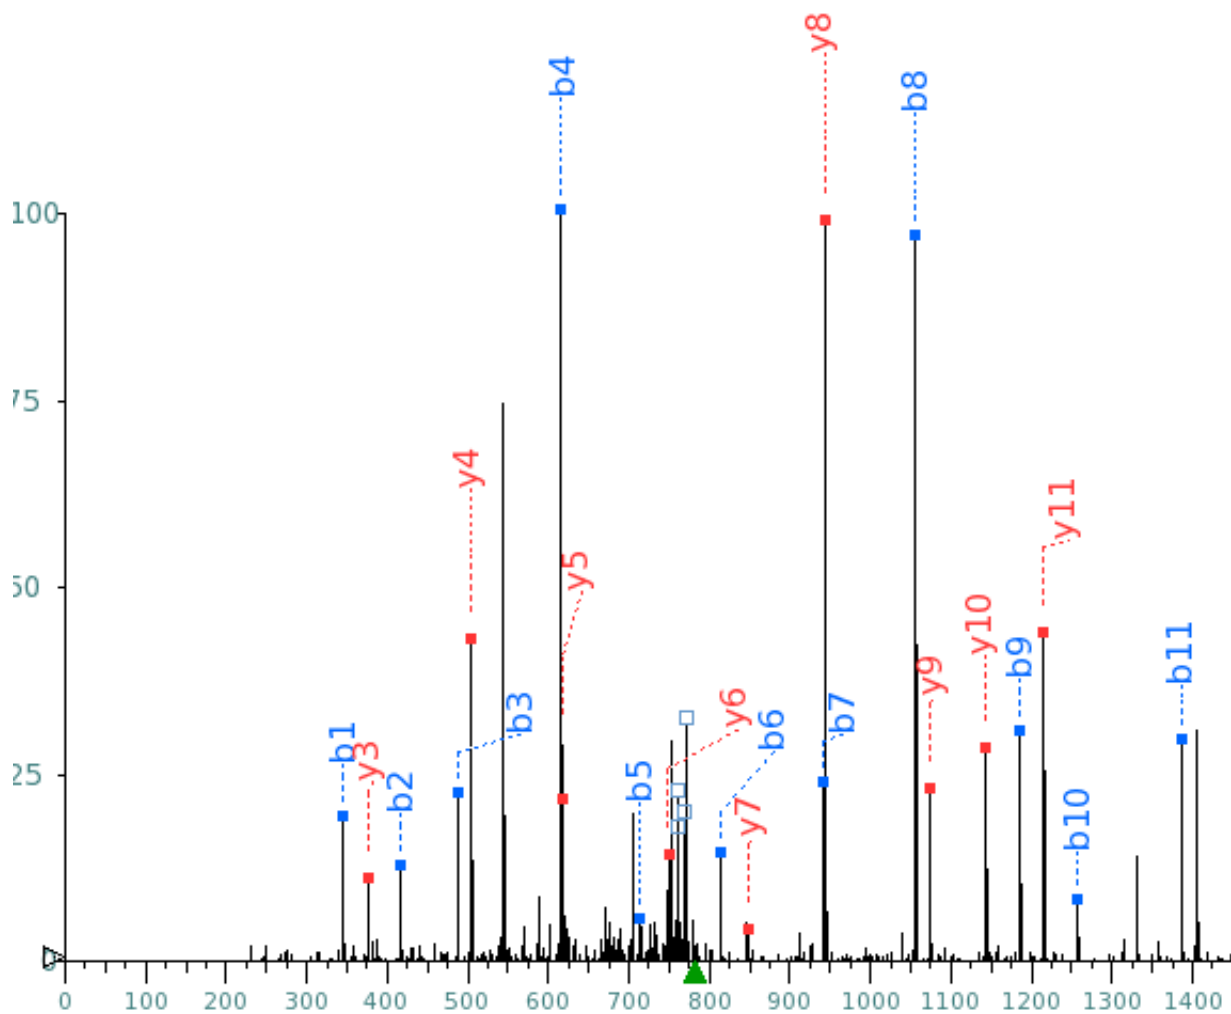

# DAAEPVEDEAER (+2)

Primary Reference: ST32C\_HUMAN

Search ID: 75282

Search Name: 20141216\_QLhumanTMT6lowres\_Obj15720\_CETSA\_1203\_Set2\_Fraction\_03

Scan#: 12182

Observed Mass: 780.3744 (1.9 ppm)

PSM Score: 51.6

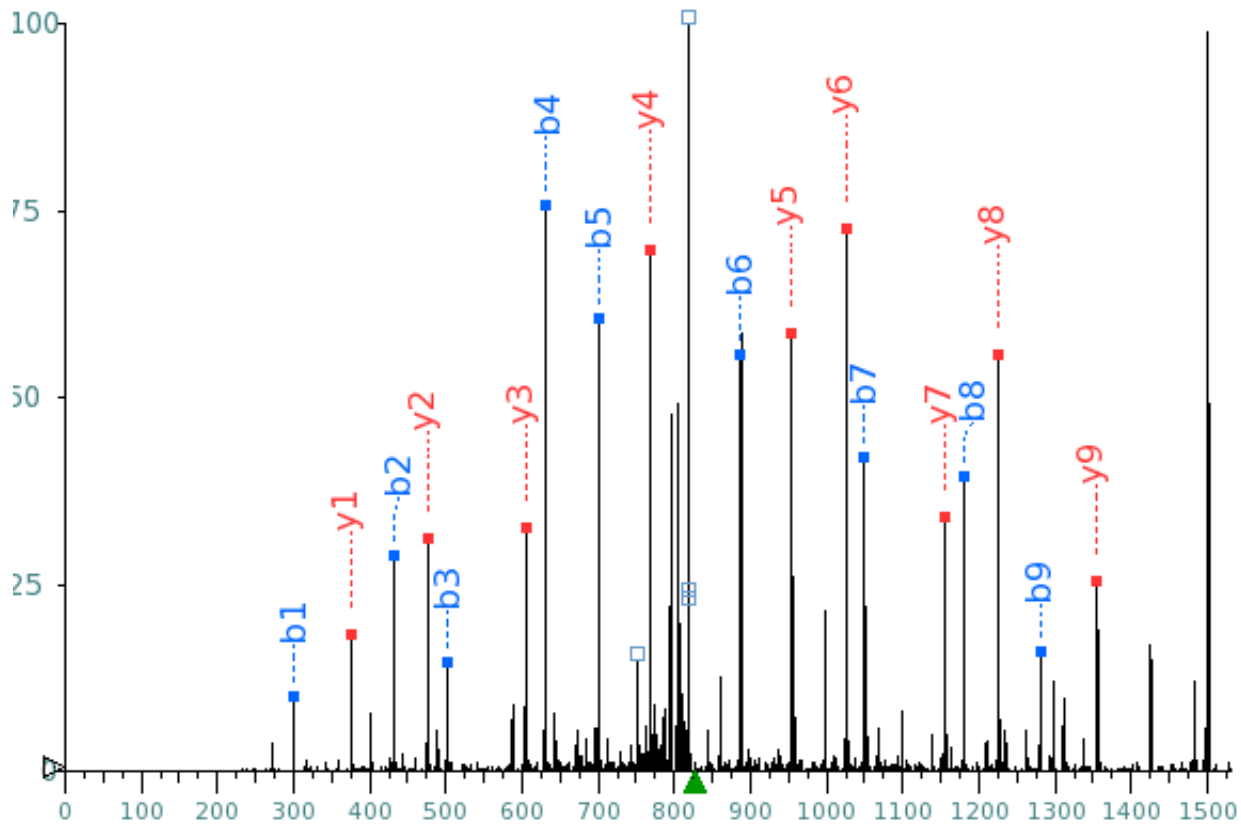

# AEAEAWYQTK (+2)

Primary Reference: K2C79\_HUMAN

Search ID: 75282

Search Name: 20141216\_QLhumanTMT6lowres\_Obj15720\_CETSA\_1203\_Set2\_Fraction\_03

Scan#: 21162

Observed Mass: 827.9466 (1.1 ppm)

PSM Score: 63.4

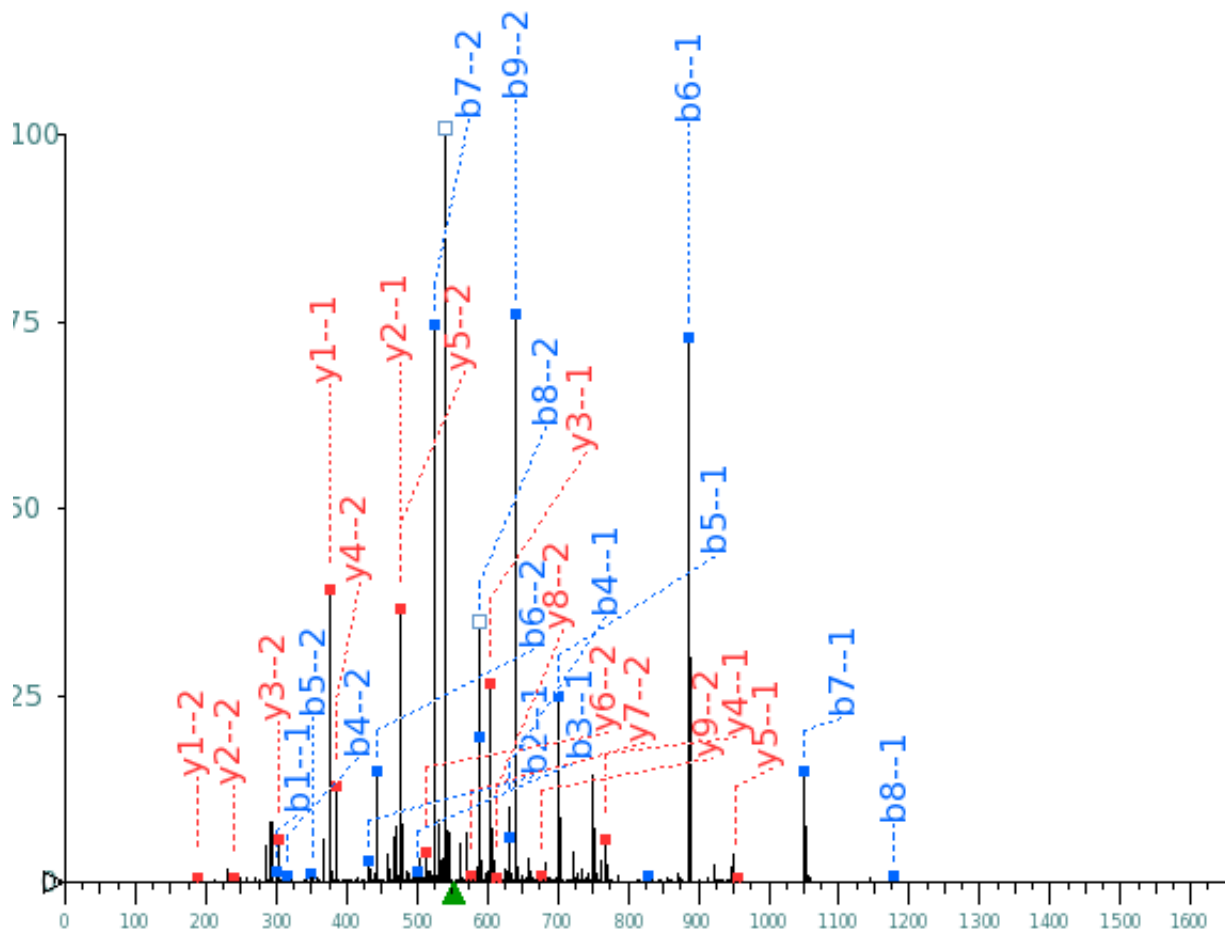

# AEAEAWYQTK (+3)

Primary Reference: K2C79\_HUMAN

Search ID: 75282

Search Name: 20141216\_QLhumanTMT6lowres\_Obj15720\_CETSA\_1203\_Set2\_Fraction\_03

Scan#: 21201

Observed Mass: 552.3 (0.9 ppm)

PSM Score: 18.12

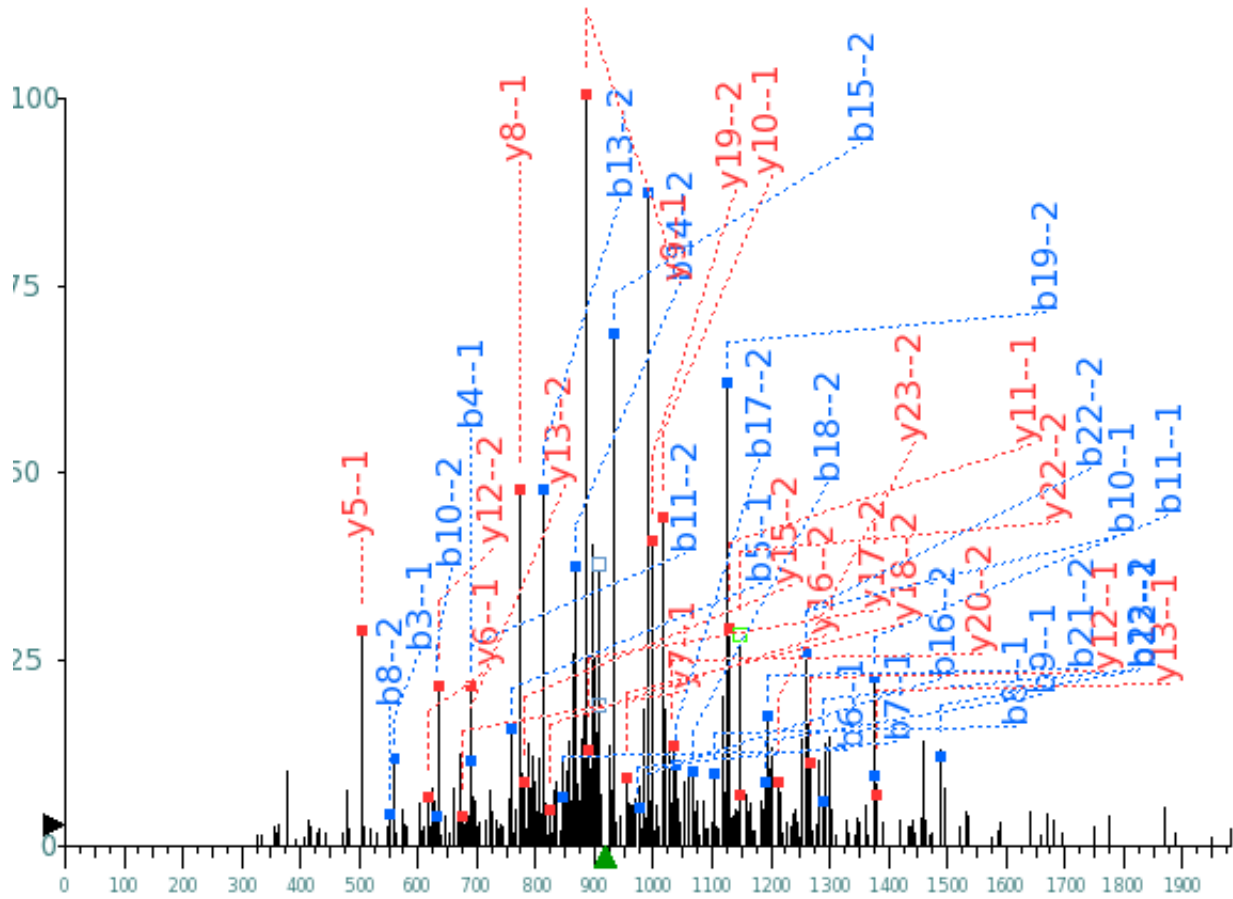

# TQVEASEESALNHLQNP GDAAEGR (+3)

Primary Reference: MOFA1\_HUMAN

Search ID: 75282

Search Name: 20141216\_QLhumanTMT6lowres\_Obj15720\_CETSA\_1203\_Set2\_Fraction\_03

Scan#: 22344

Observed Mass: 918.1177 (1.9 ppm)

PSM Score: 40.8



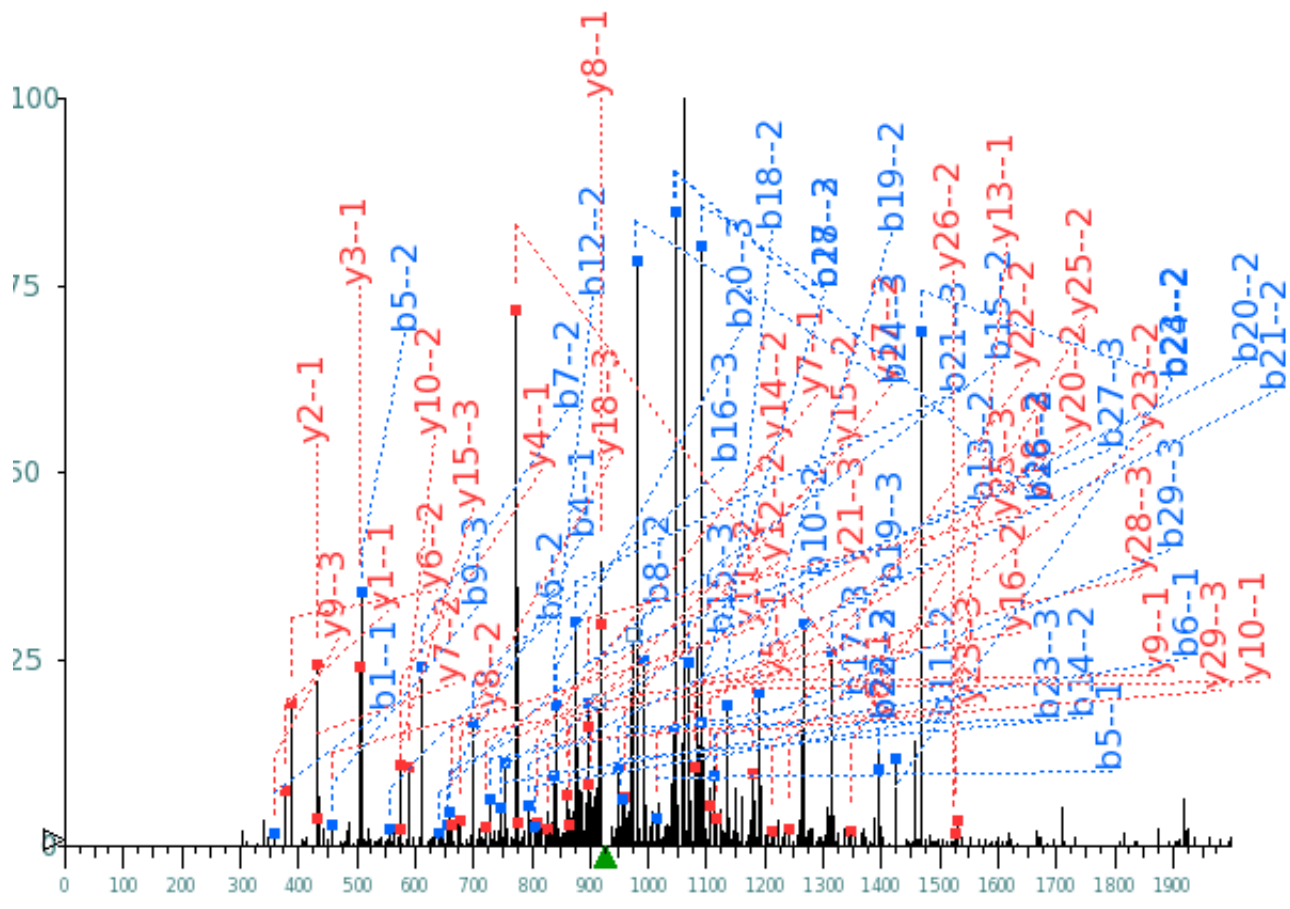

# ELLAKPIGPDDAIDALSSDFTCGSPTAAGK (+4)

Primary Reference: B2RCJ7\_HUMAN

Search ID: 75282

Search Name: 20141216\_QLhumanTMT6lowres\_Obj15720\_CETSA\_1203\_Set2\_Fraction\_03

Scan#: 38624

Observed Mass: 926.9968 (-0.2 ppm)

PSM Score: 46.79

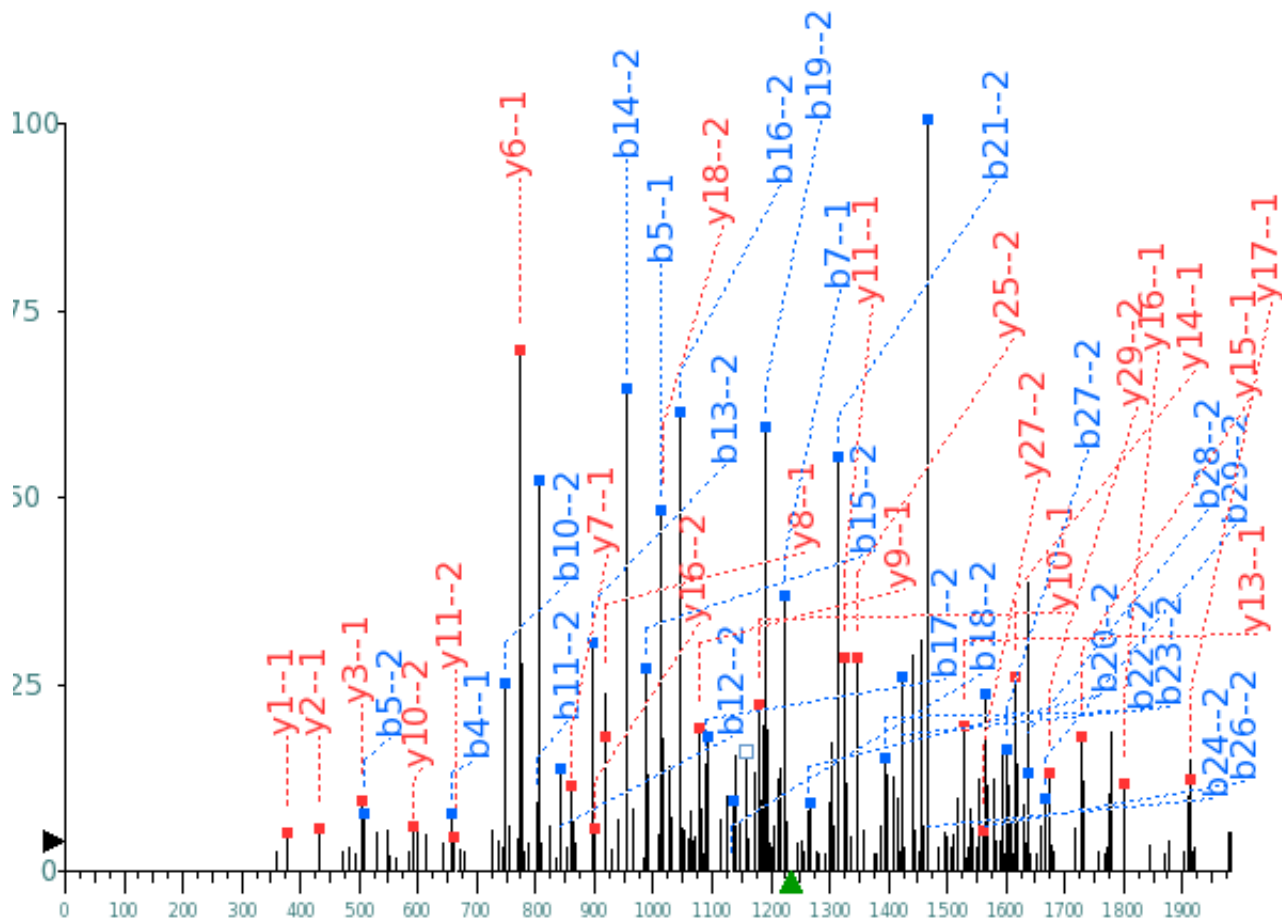

# ELLAKPIGPDDAIDALSSDFTCGSPTAAGK (+3)

Primary Reference: B2RCJ7\_HUMAN

Search ID: 75282

Search Name: 20141216\_QLhumanTMT6lowres\_Obj15720\_CETSA\_1203\_Set2\_Fraction\_03

Scan#: 38661

Observed Mass: 1235.6601 (-0 ppm)

PSM Score: 83.18

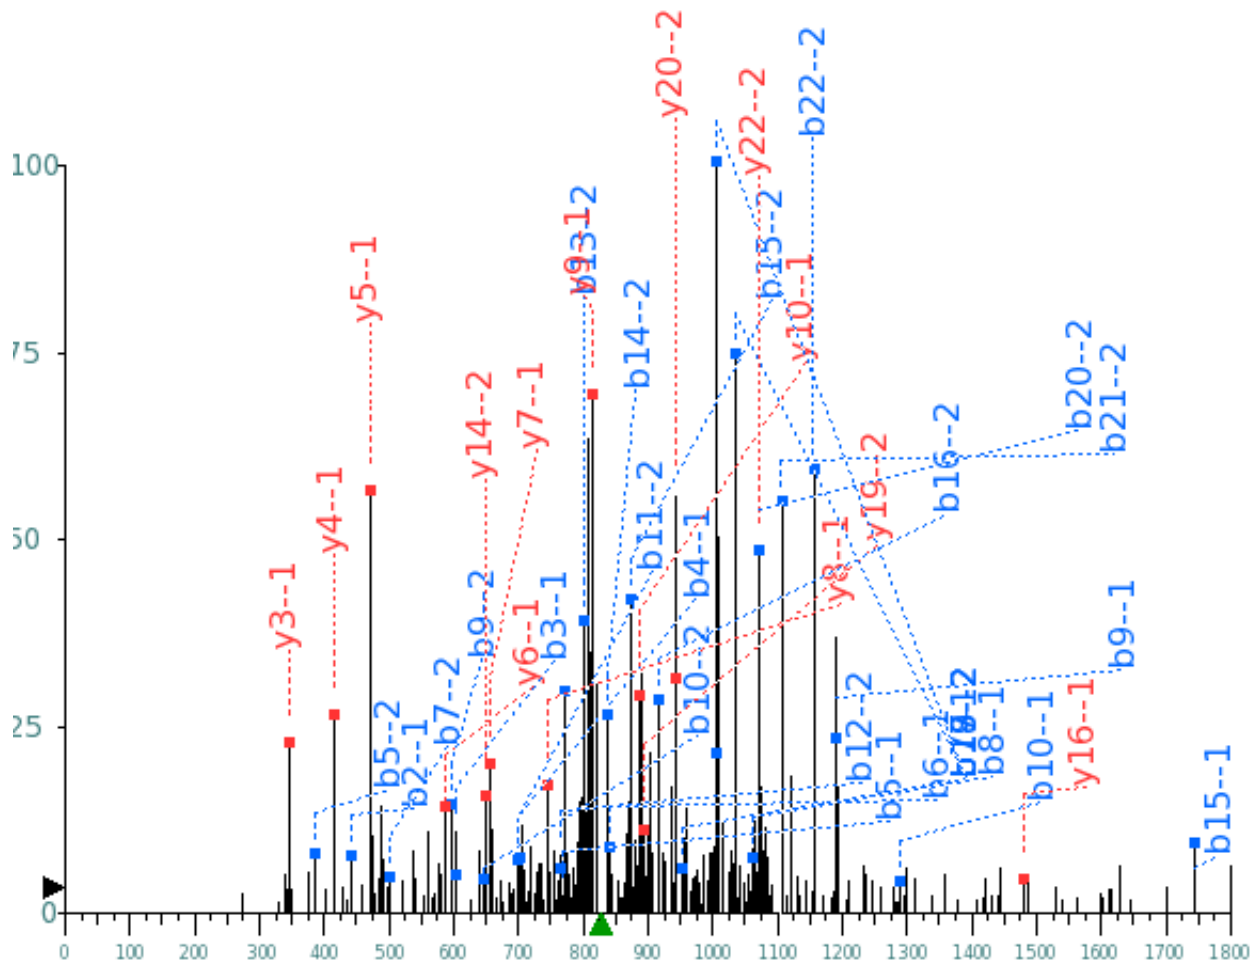

# LVCPAAYGEPLQAAASALGAAVR (+3)

Primary Reference: F8I2\_HUMAN

Search ID: 75282

Search Name: 20141216\_QLhumanTMT6lowres\_Obj15720\_CETSA\_1203\_Set2\_Fraction\_03

Scan#: 41905

Observed Mass: 829.1184 (-1.1 ppm)

PSM Score: 45.41

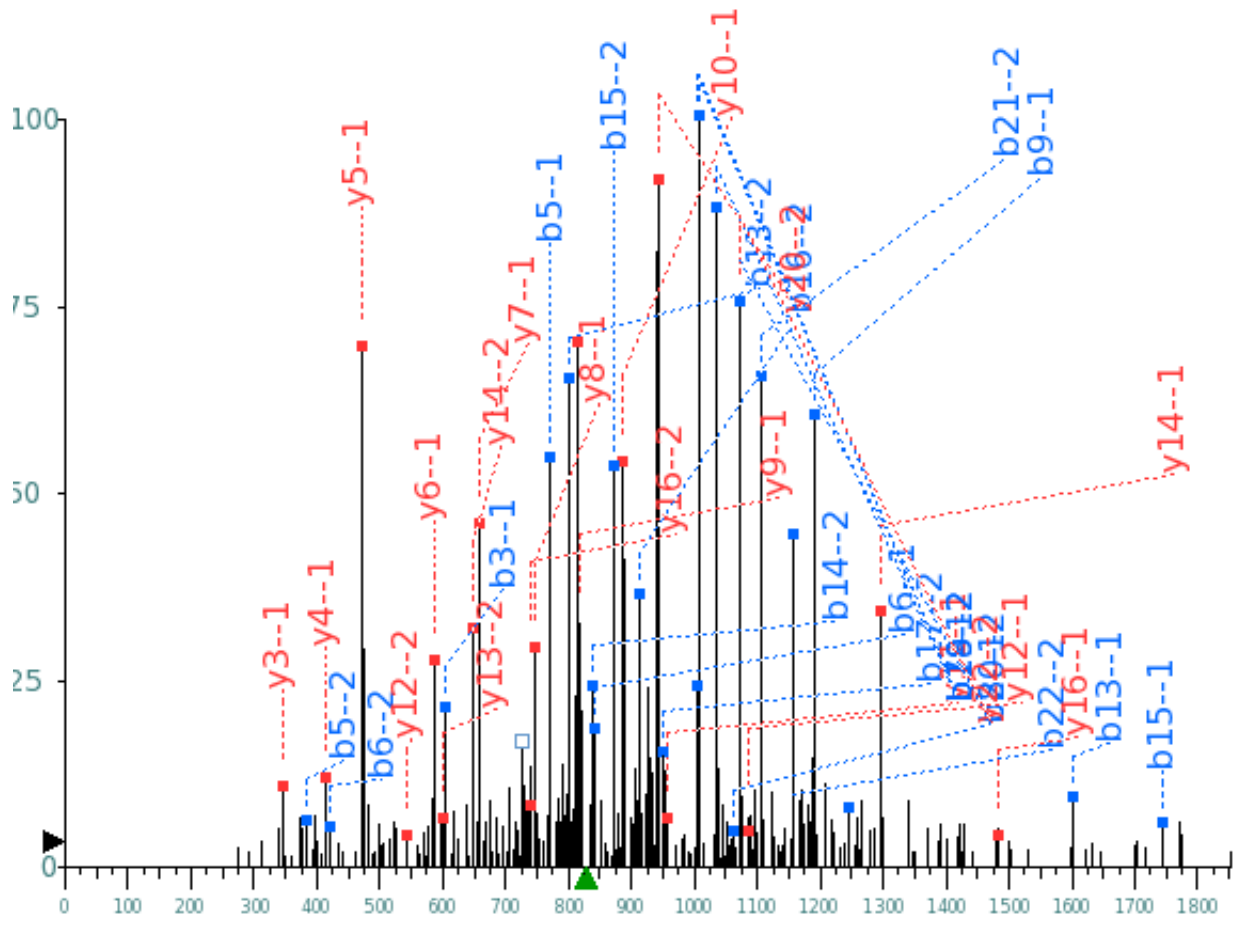

# LVCPAAYGEPLQAAASALGAAVR (+3)

Primary Reference: F8I2\_HUMAN

Search ID: 75282

Search Name: 20141216\_QLhumanTMT6lowres\_Obj15720\_CETSA\_1203\_Set2\_Fraction\_03

Scan#: 41924

Observed Mass: 829.1199 (0.7 ppm)

PSM Score: 46.82

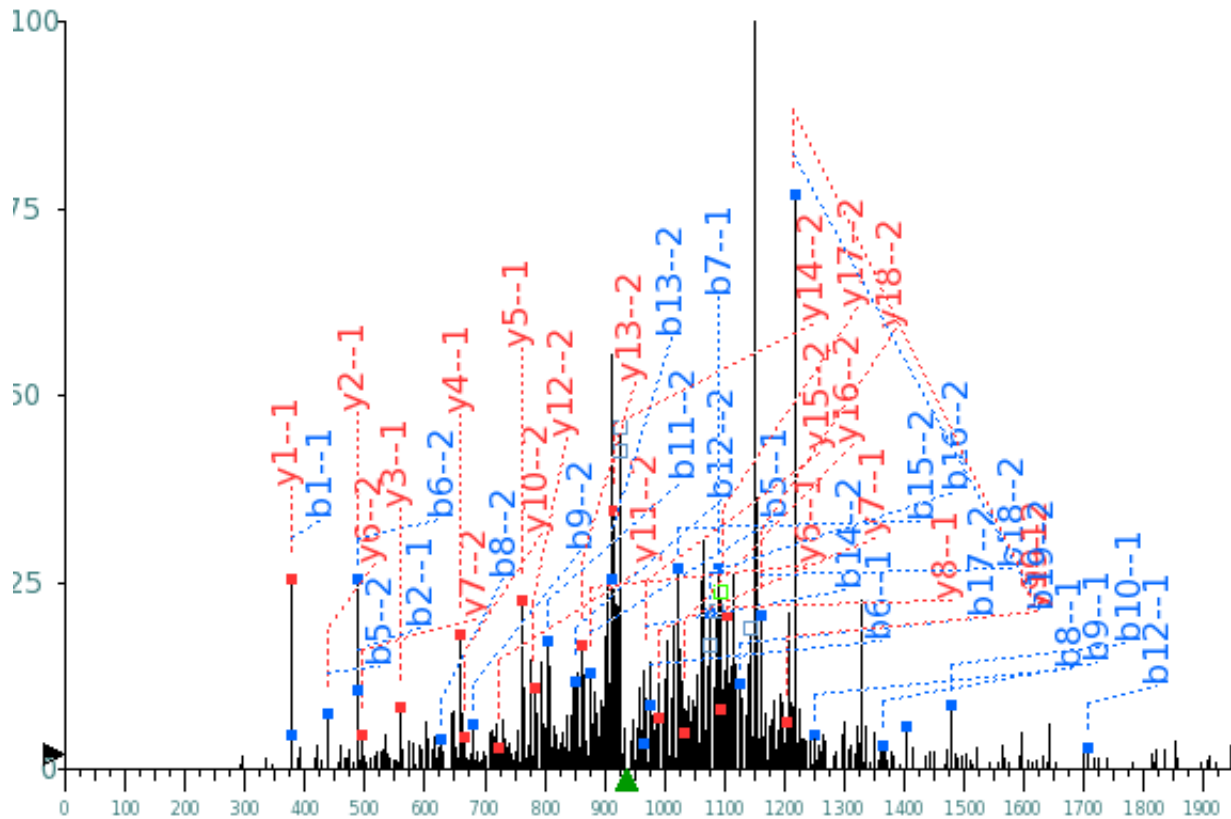

# FLEQQTLCNNQVNDLTTALK (+3)

Primary Reference: T4AF1\_HUMAN

Search ID: 75283

Search Name: 20141216\_QLhumanTMT6lowres\_Obj15720\_CETSA\_1203\_Set2\_Fraction\_04

Scan#: 34847

Observed Mass: 936.8366 (-0.5 ppm)

PSM Score: 20.5

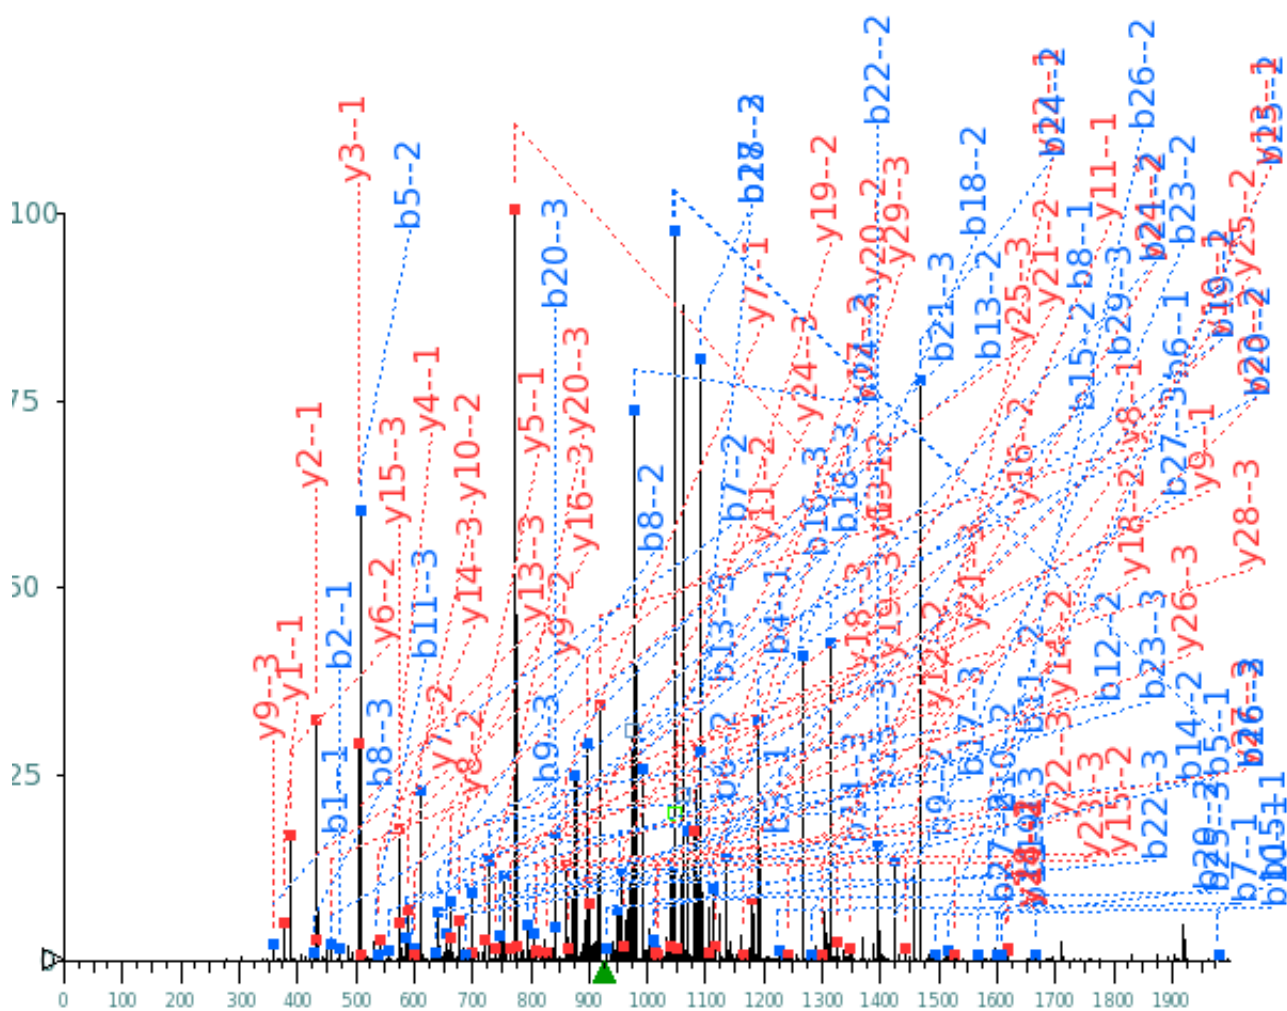

# ELLAKPIGPDDAIDALSSDFTCGSPTAAGK (+4)

Primary Reference: B2RCJ7\_HUMAN

Search ID: 75283

Search Name: 20141216\_QLhumanTMT6lowres\_Obj15720\_CETSA\_1203\_Set2\_Fraction\_04

Scan#: 38687

Observed Mass: 926.9979 (1 ppm)

PSM Score: 48.17

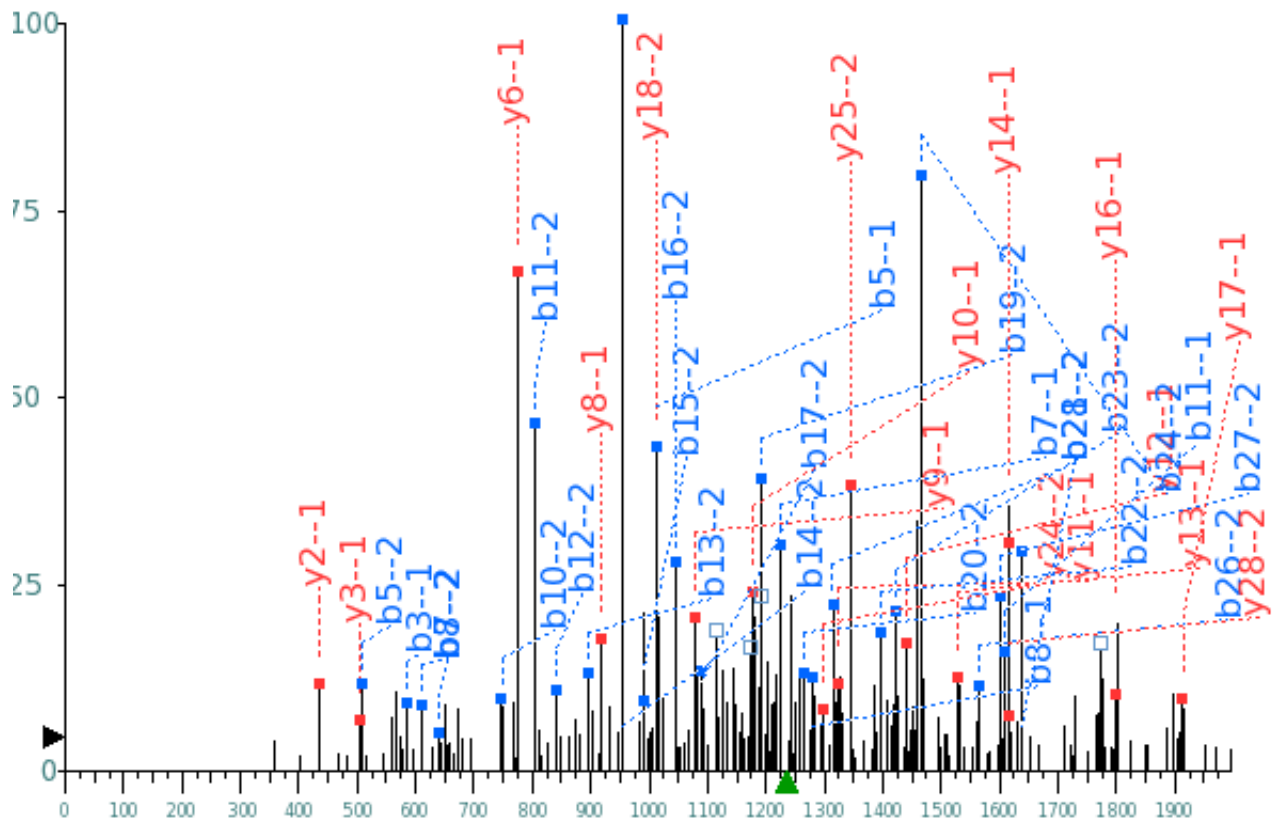

# ELLAKPIGPDDAIDALSSDFTCGSPTAAGK (+3)

Primary Reference: B2RCJ7\_HUMAN

Search ID: 75283

Search Name: 20141216\_QLhumanTMT6lowres\_Obj15720\_CETSA\_1203\_Set2\_Fraction\_04

Scan#: 38851

Observed Mass: 1235.6605 (0.2 ppm)

PSM Score: 76.52

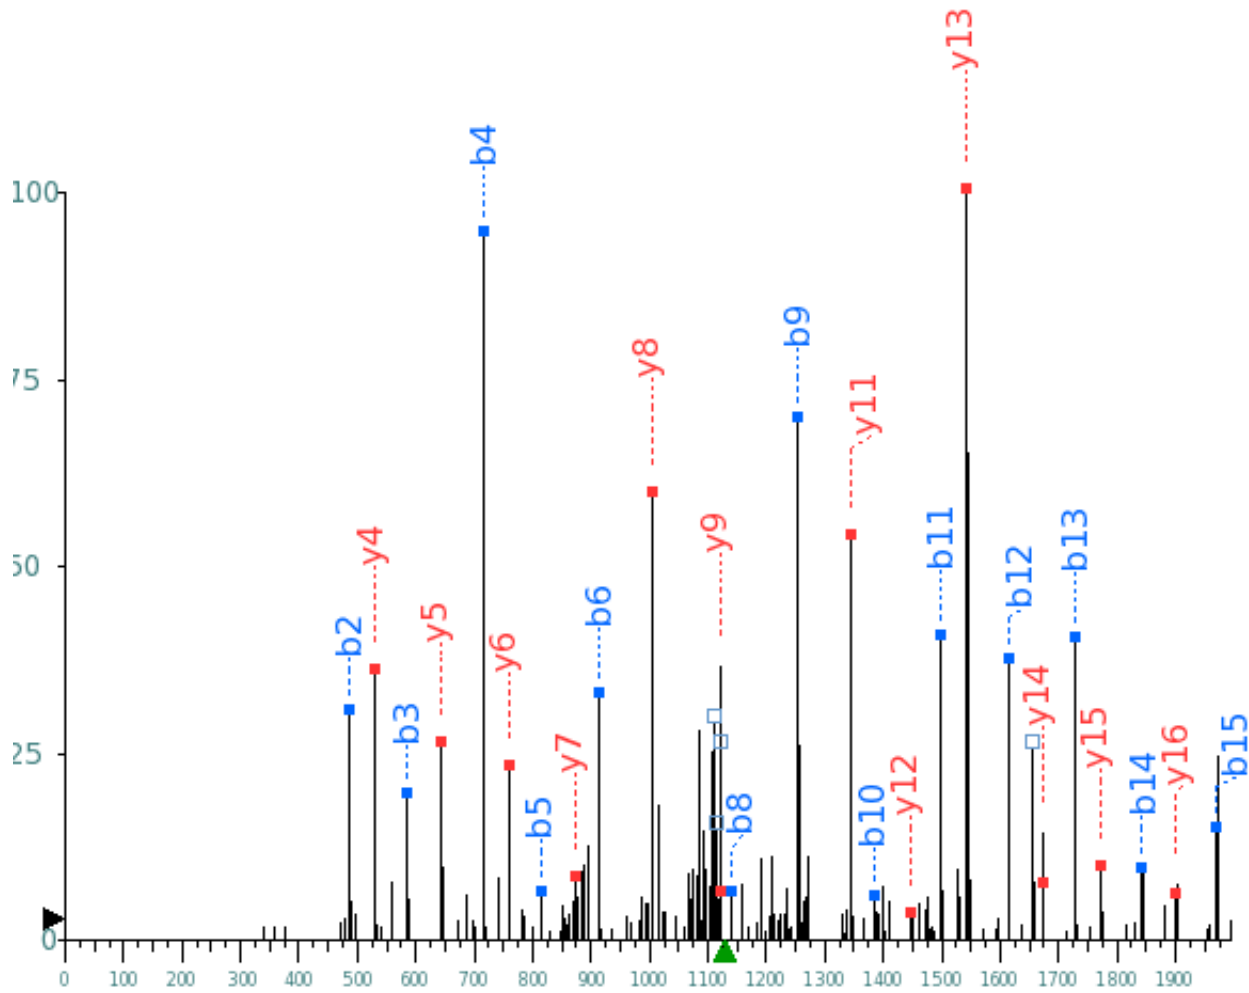

# EQVEPTPEDEDDIELR (+2)

Primary Reference: PEG10\_HUMAN

Search ID: 75284

Search Name: 20141216\_QLhumanTMT6lowres\_Obj15720\_CETSA\_1203\_Set2\_Fraction\_05

Scan#: 21846

Observed Mass: 1129.5288 (-0.2 ppm)

PSM Score: 64.27



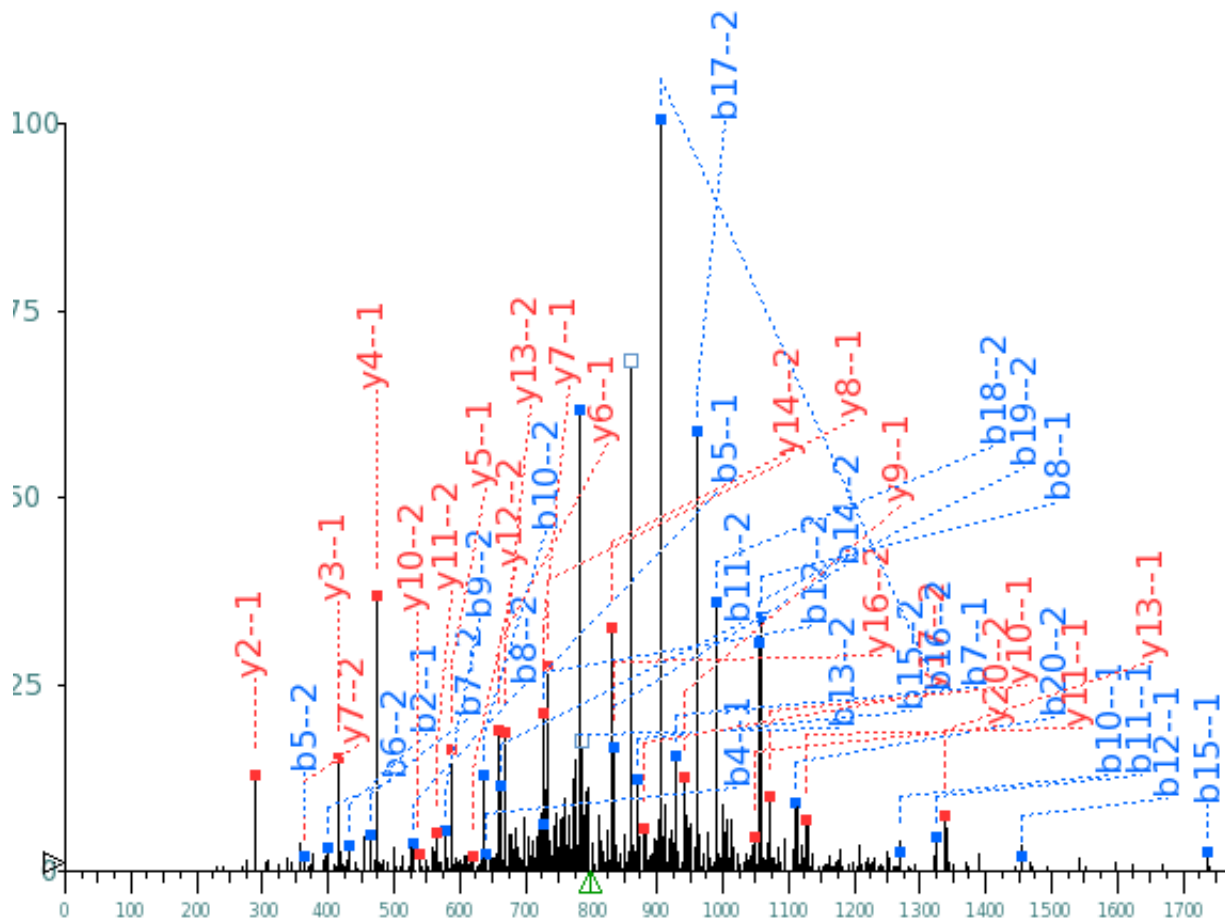

# AEPNSAEEPLGQLTAALGELR (+3)

Primary Reference: FANCA\_HUMAN

Search ID: 75284

Search Name: 20141216\_QLhumanTMT6lowres\_Obj15720\_CETSA\_1203\_Set2\_Fraction\_05

Scan#: 39430

Observed Mass: 799.0935 (-0.3 ppm)

PSM Score: 67.16

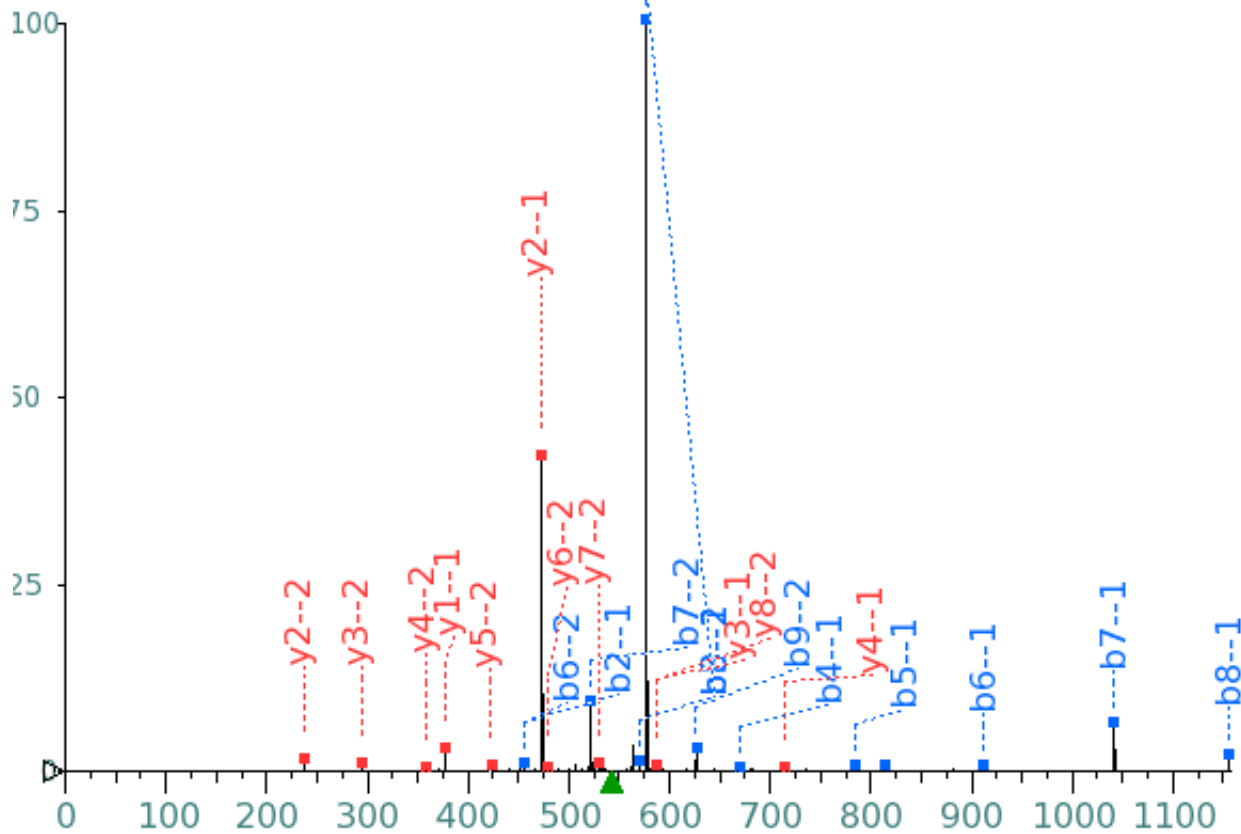

# ILDVLEEIPK (+3)

Primary Reference: NDUA5\_HUMAN

Search ID: 75284

Search Name: 20141216\_QLhumanTMT6lowres\_Obj15720\_CETSA\_1203\_Set2\_Fraction\_05

Scan#: 40251

Observed Mass: 543.0074 (-0.3 ppm)

PSM Score: 31.3

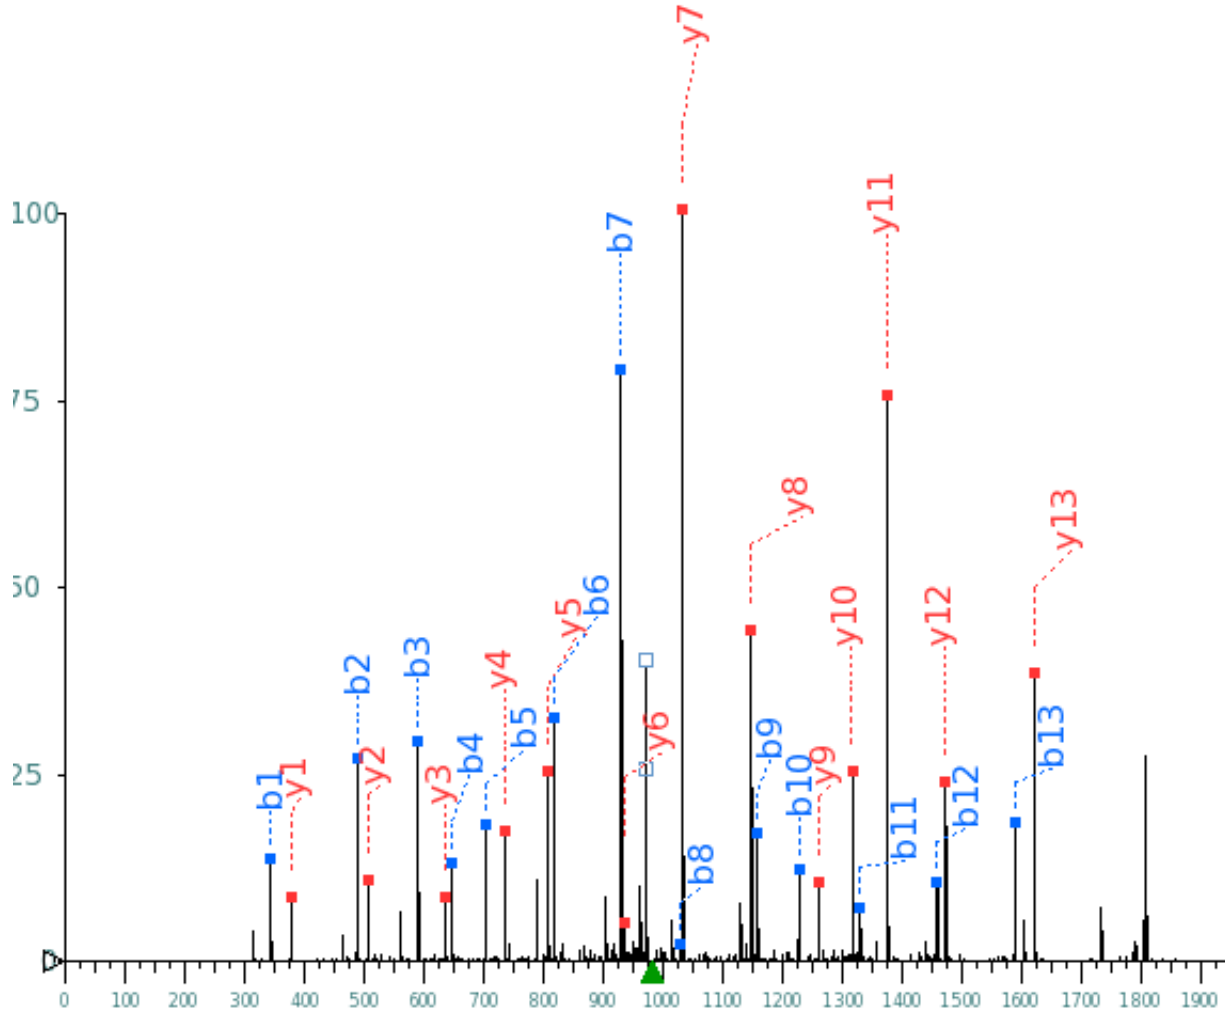

# IFVGGLNPEATEEK (+2)

Primary Reference: B4DMY3\_HUMAN

Search ID: 75293

Search Name: 20141216\_QLhumanTMT6lowres\_Obj15720\_CETSA\_1203\_Set2\_Fraction\_06

Scan#: 28488

Observed Mass: 981.5495 (-1.5 ppm)

PSM Score: 67.37

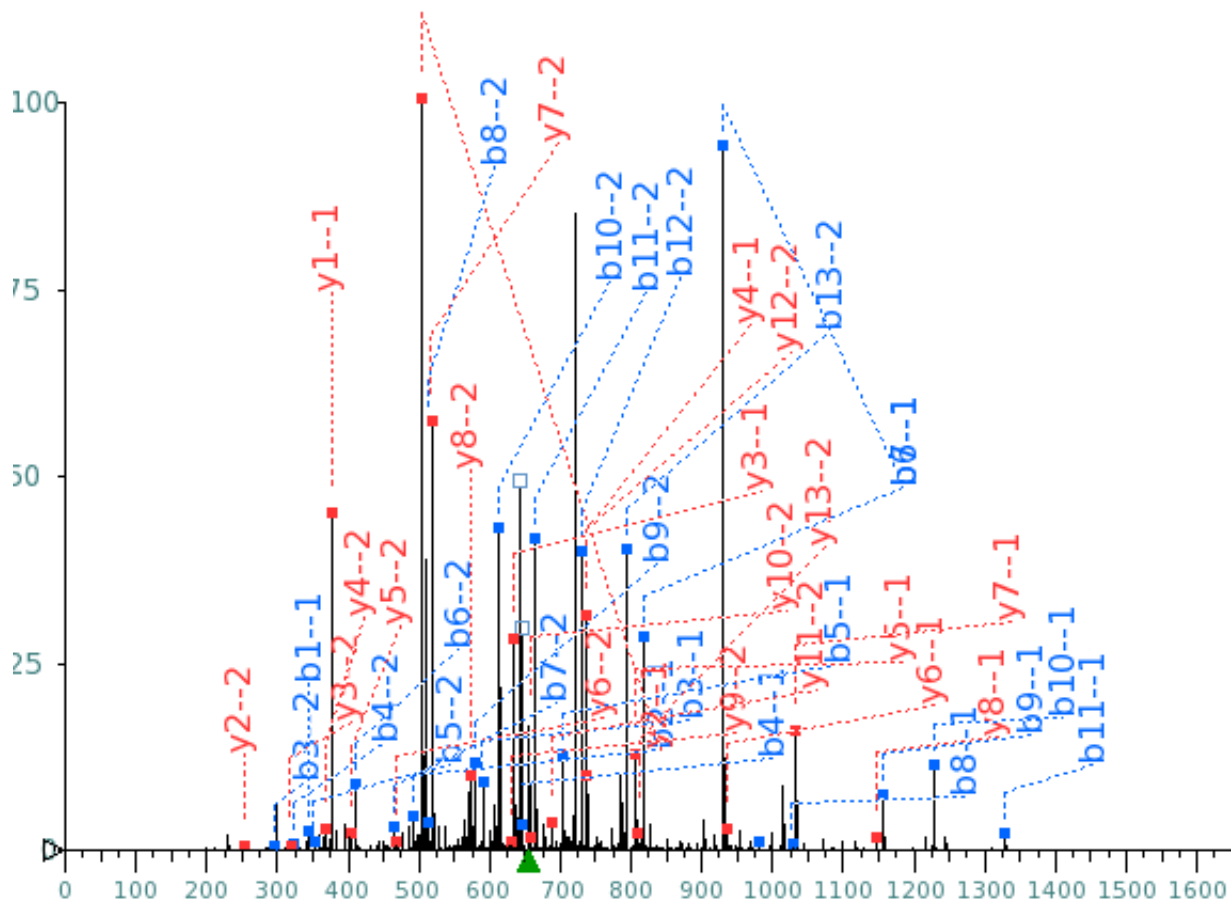

# IFVGGLNPEATEEK (+3)

Primary Reference: B4DMY3\_HUMAN

Search ID: 75293

Search Name: 20141216\_QLhumanTMT6lowres\_Obj15720\_CETSA\_1203\_Set2\_Fraction\_06

Scan#: 28542

Observed Mass: 654.7018 (-2.1 ppm)

PSM Score: 31.26

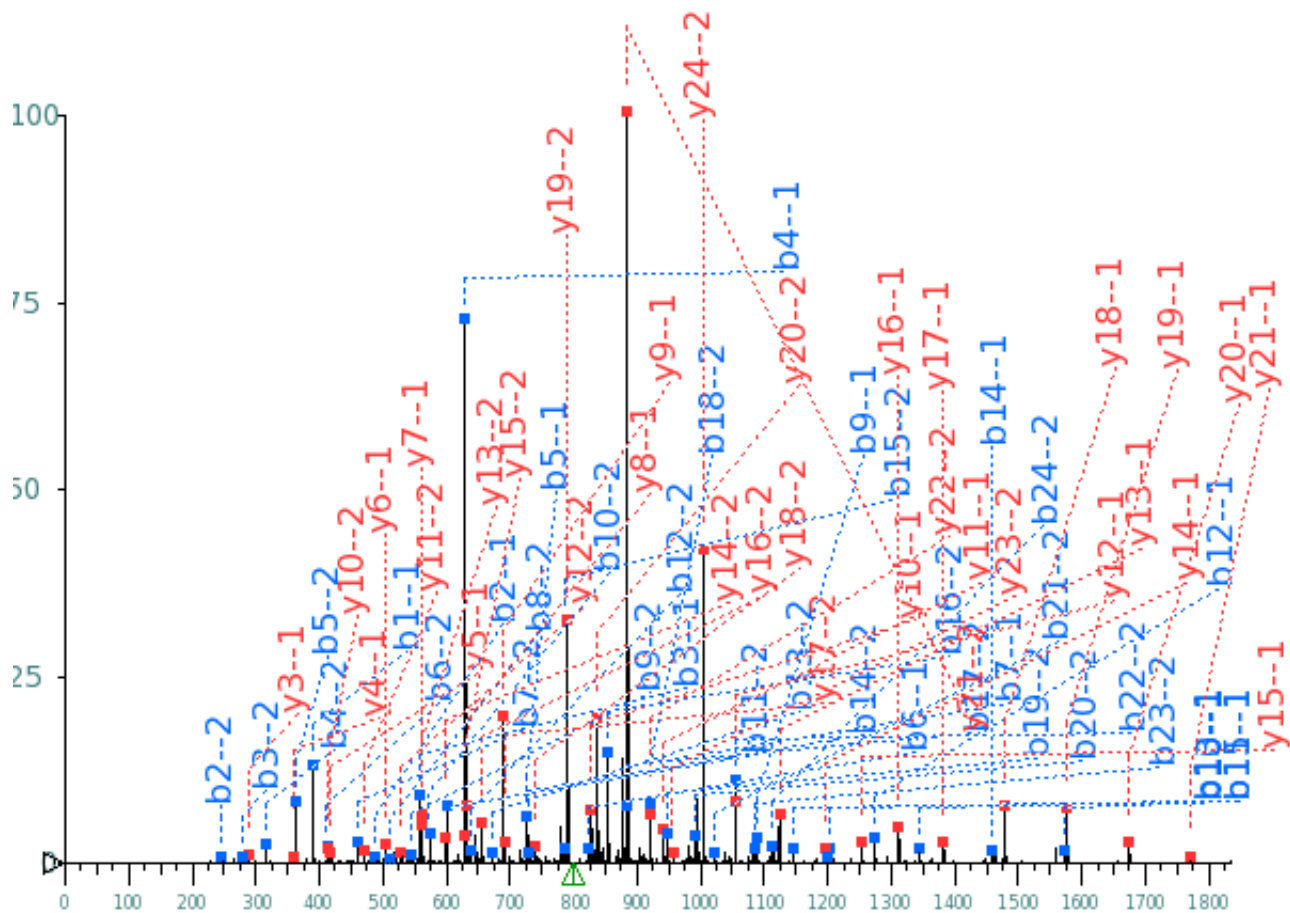

# CPAAPPPPAGGAANNHGAGSGAGGR (+3)

Primary Reference: Q96GF2\_HUMAN

Search ID: 75295

Search Name: 20141216\_QLhumanTMT6lowres\_Obj15720\_CETSA\_1203\_Set2\_Fraction\_07

Scan#: 9835

Observed Mass: 800.0603 (1.3 ppm)

PSM Score: 105.61

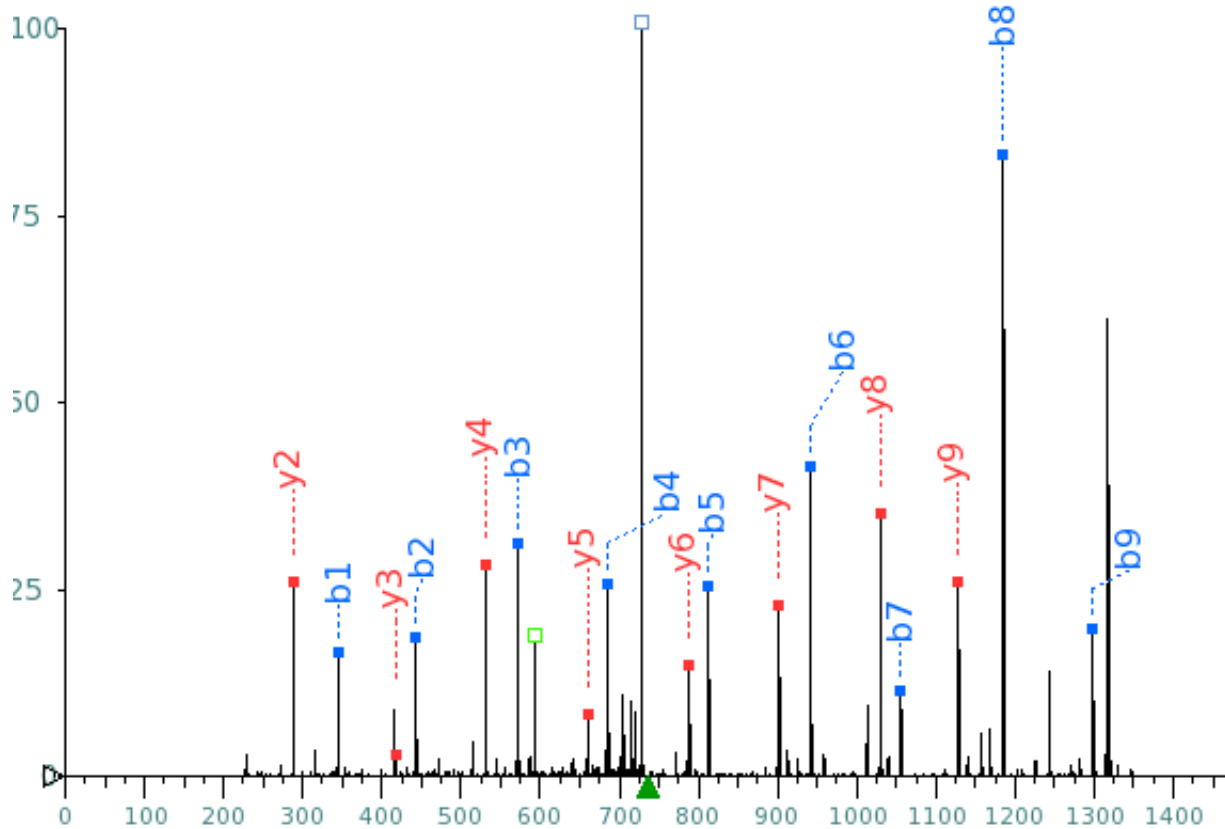

# NVQLQENEIR (+2)

Primary Reference: PP1G\_HUMAN

Search ID: 75295

Search Name: 20141216\_QLhumanTMT6lowres\_Obj15720\_CETSA\_1203\_Set2\_Fraction\_07

Scan#: 16037

Observed Mass: 736.408 (1.5 ppm)

PSM Score: 66.23

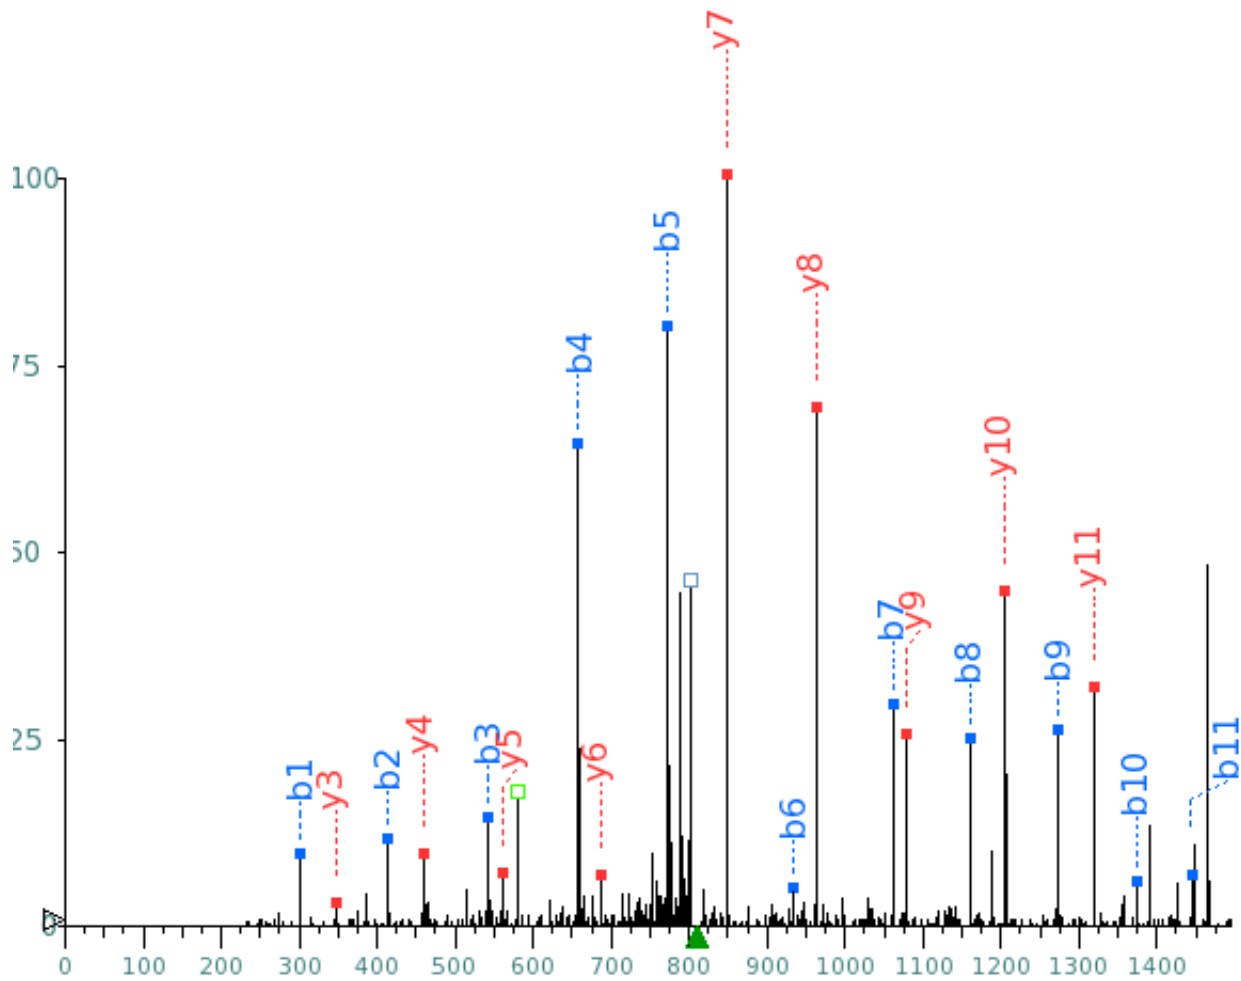

# AIQDDCQVITAR (+2)

Primary Reference: FFR\_HUMAN

Search ID: 75295

Search Name: 20141216\_QLhumanTMT6lowres\_Obj15720\_CETSA\_1203\_Set2\_Fraction\_07

Scan#: 17255

Observed Mass: 809.9248 (0.2 ppm)

PSM Score: 56.69

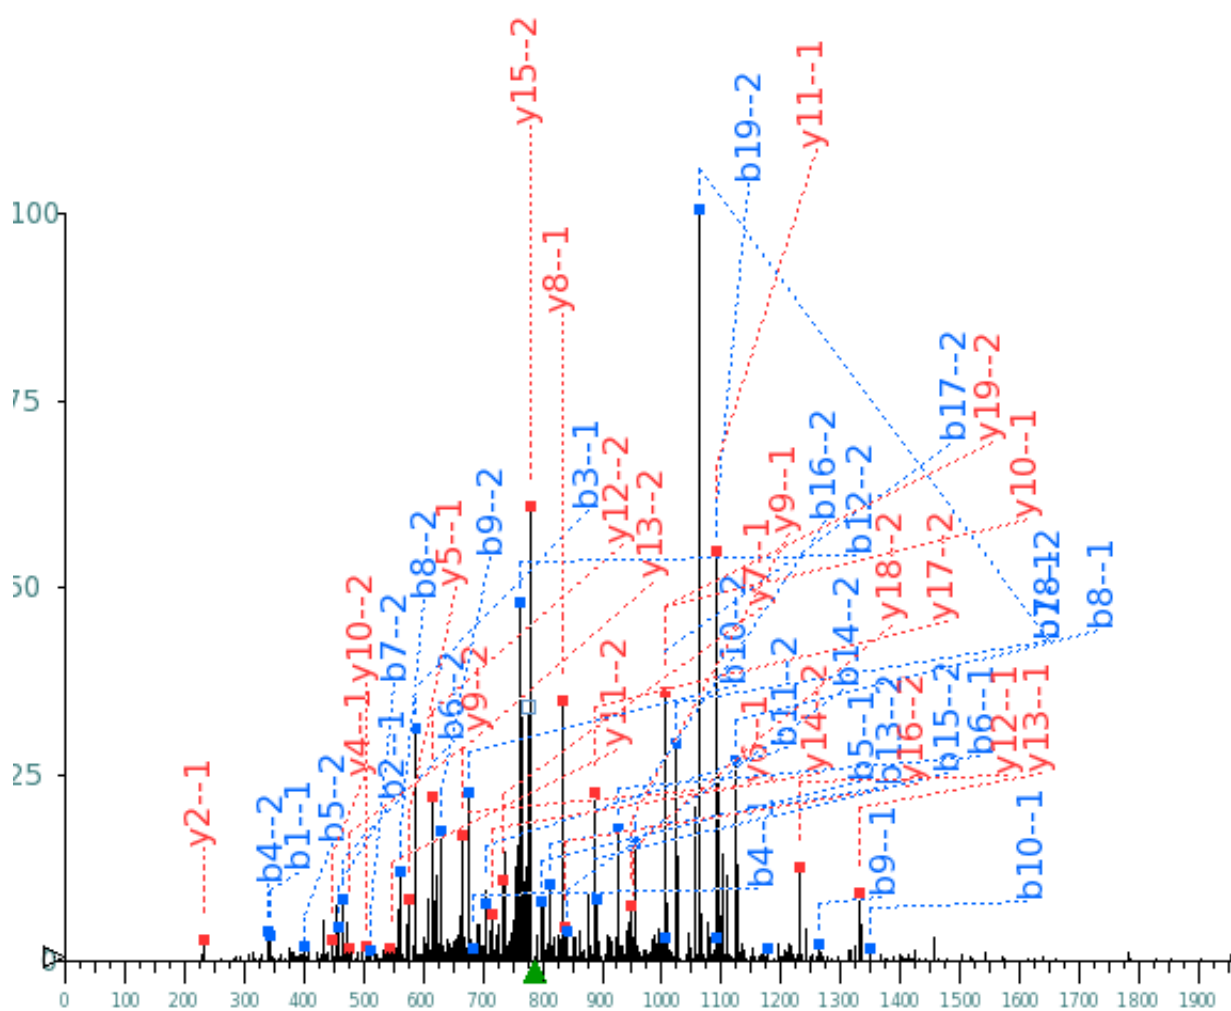

# IIEPNEVTHSGDTGVETDGR (+3)

Primary Reference: B4E2P4\_HUMAN

Search ID: 75295

Search Name: 20141216\_QLhumanTMT6lowres\_Obj15720\_CETSA\_1203\_Set2\_Fraction\_07

Scan#: 18925

Observed Mass: 785.726 (0.3 ppm)

PSM Score: 53



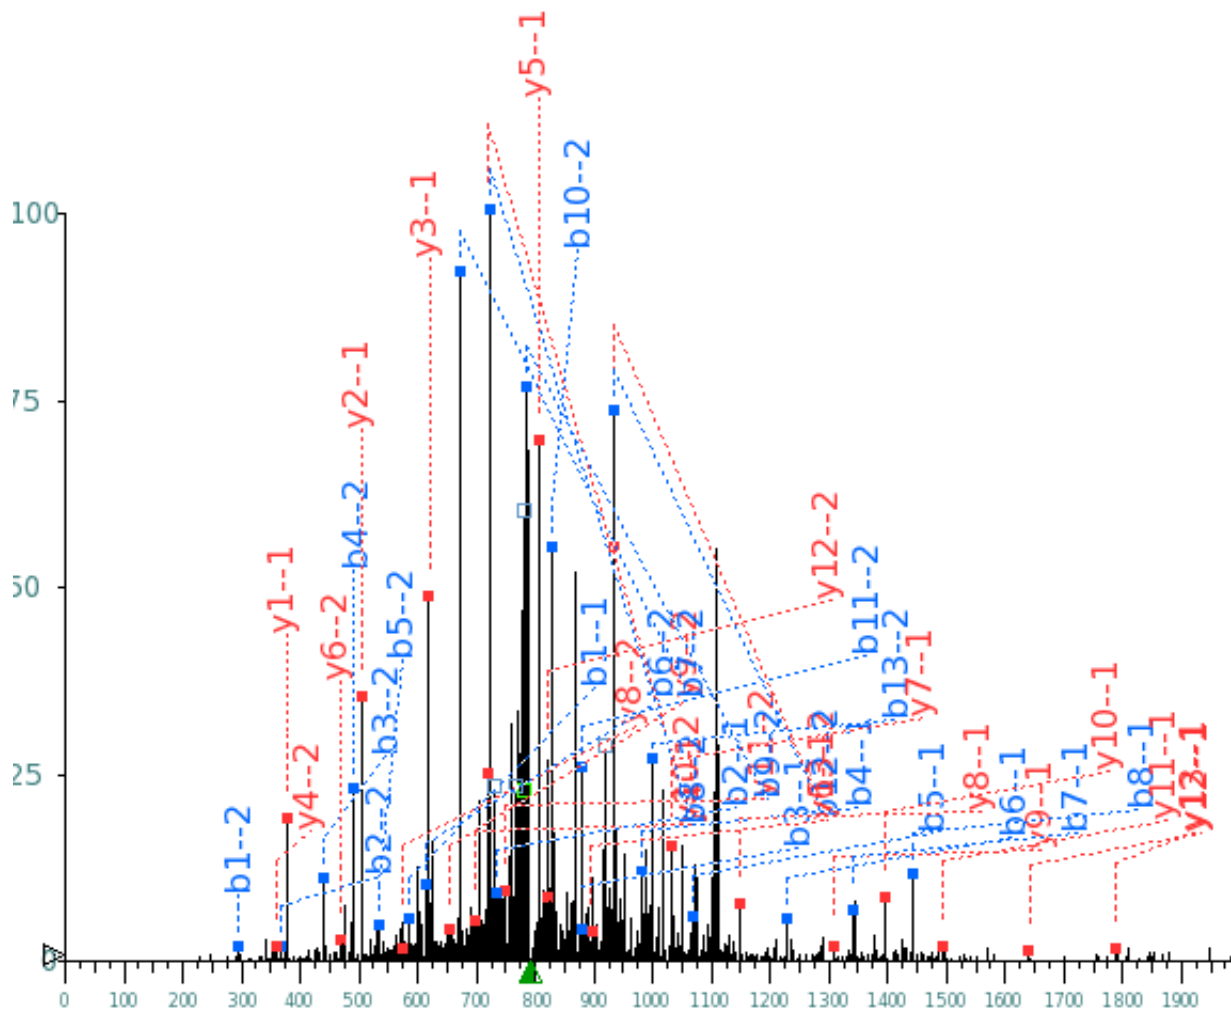

# KFFVSCNVQSVDEK (+3)

Primary Reference: THEM4\_HUMAN

Search ID: 75295

Search Name: 20141216\_QLhumanTMT6lowres\_Obj15720\_CETSA\_1203\_Set2\_Fraction\_07

Scan#: 23659

Observed Mass: 792.1064 (0.1 ppm)

PSM Score: 54.1

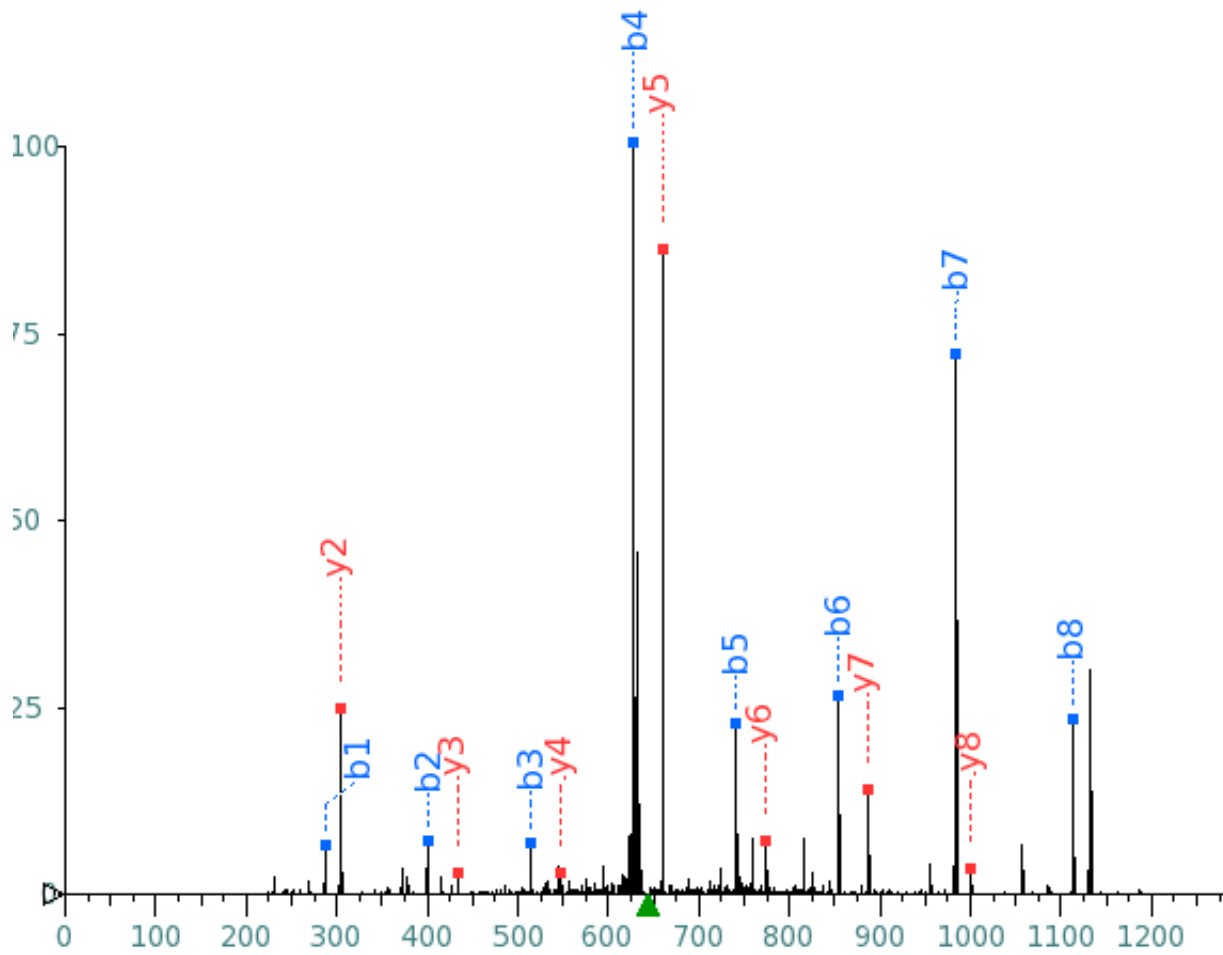

# GIIDLIEER (+2)

Primary Reference: E5KND7\_HUMAN

Search ID: 75295

Search Name: 20141216\_QLhumanTMT6lowres\_Obj15720\_CETSA\_1203\_Set2\_Fraction\_07

Scan#: 31123

Observed Mass: 643.8796 (0.1 ppm)

PSM Score: 54.3

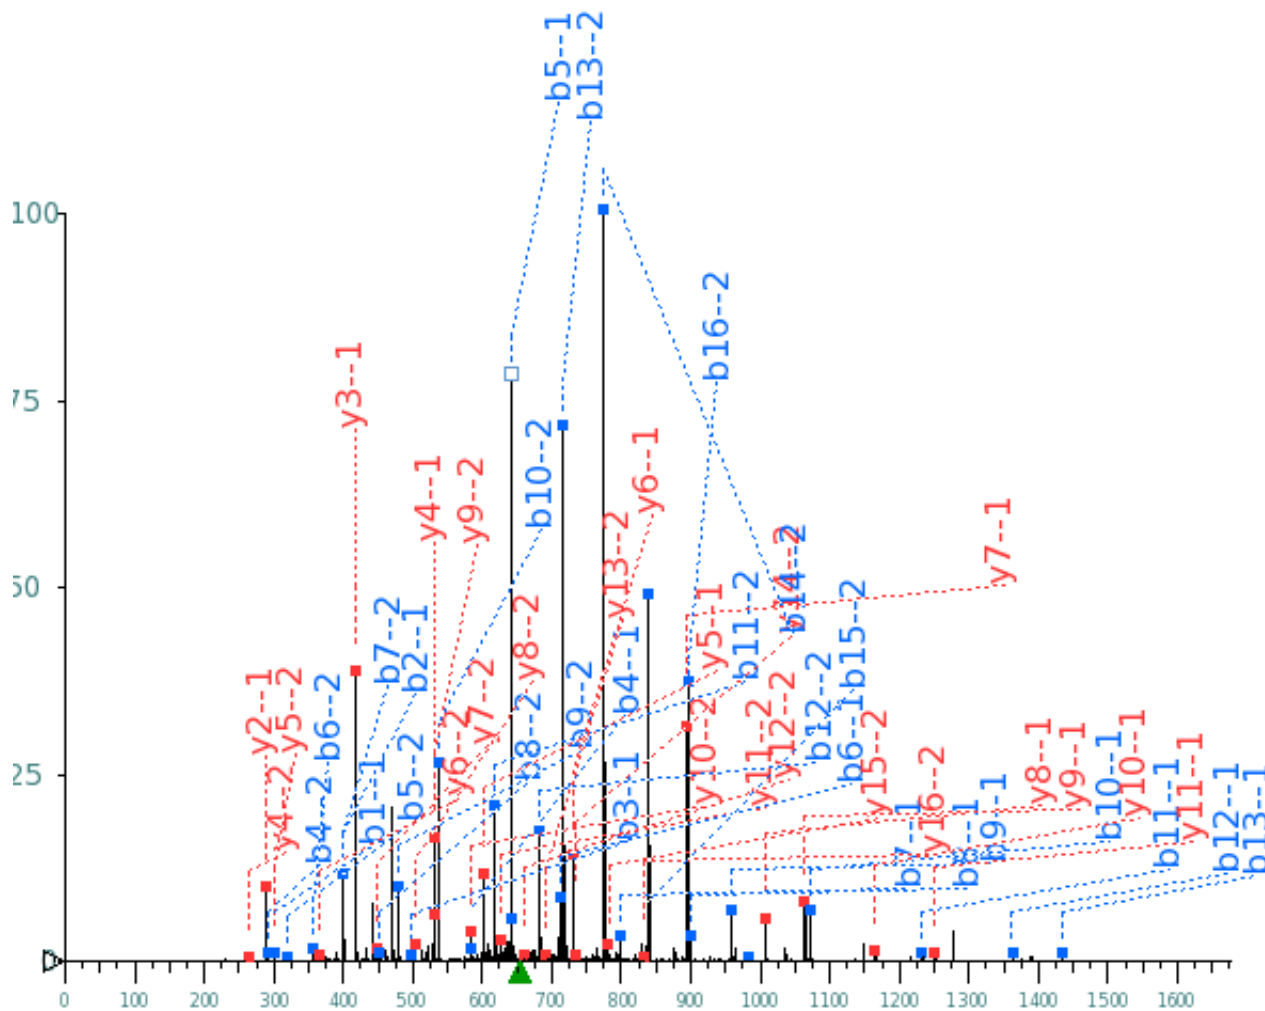

# AVPSGASTGIYEALRLR (+3)

Primary Reference: A4UCS8\_HUMAN

Search ID: 75295

Search Name: 20141216\_QLhumanTMT6lowres\_Obj15720\_CETSA\_1203\_Set2\_Fraction\_07

Scan#: 31745

Observed Mass: 655.0282 (0.2 ppm)

PSM Score: 54.43

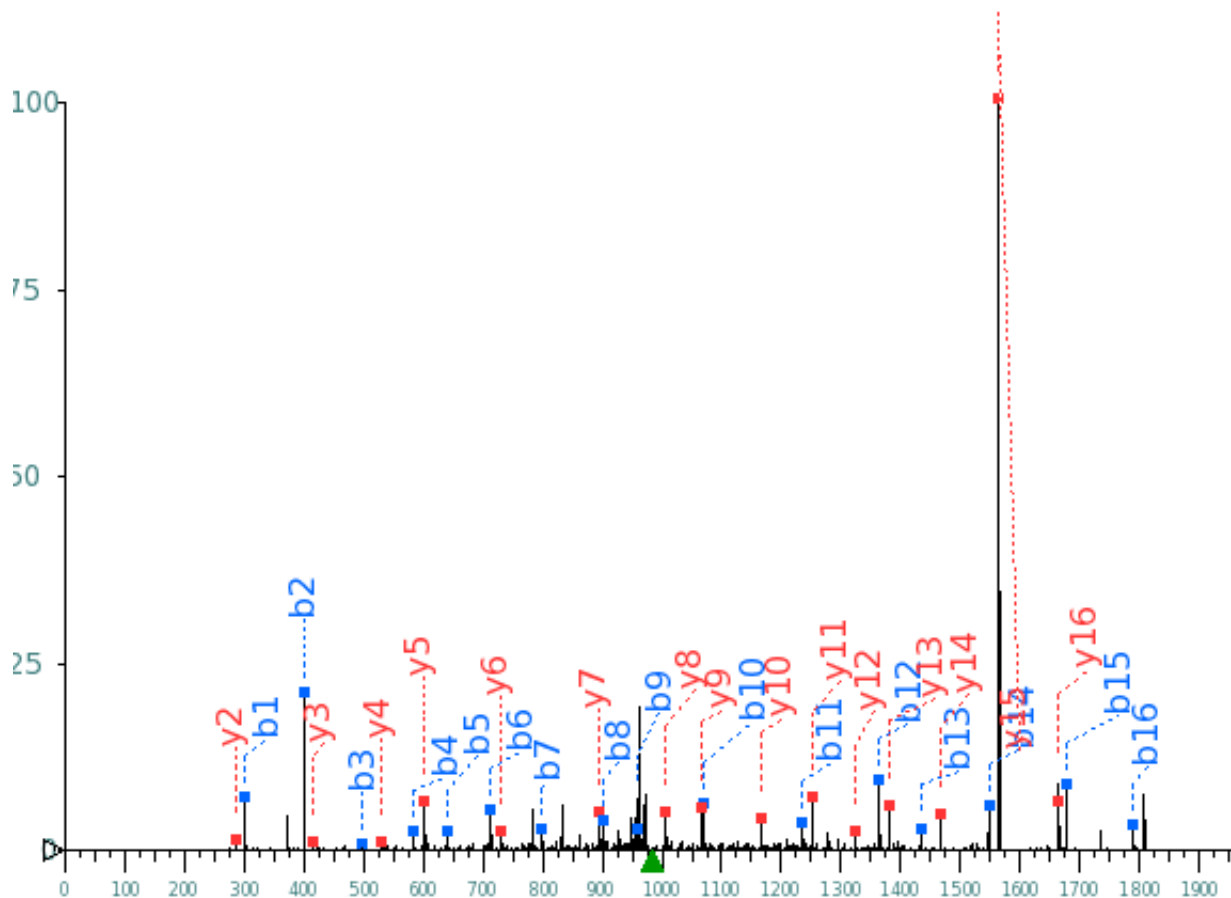

# AVPSGASTGIYEALRLR (+2)

Primary Reference: A4UCS8\_HUMAN

Search ID: 75295

Search Name: 20141216\_QLhumanTMT6lowres\_Obj15720\_CETSA\_1203\_Set2\_Fraction\_07

Scan#: 31754

Observed Mass: 982.0383 (-0.2 ppm)

PSM Score: 73.82

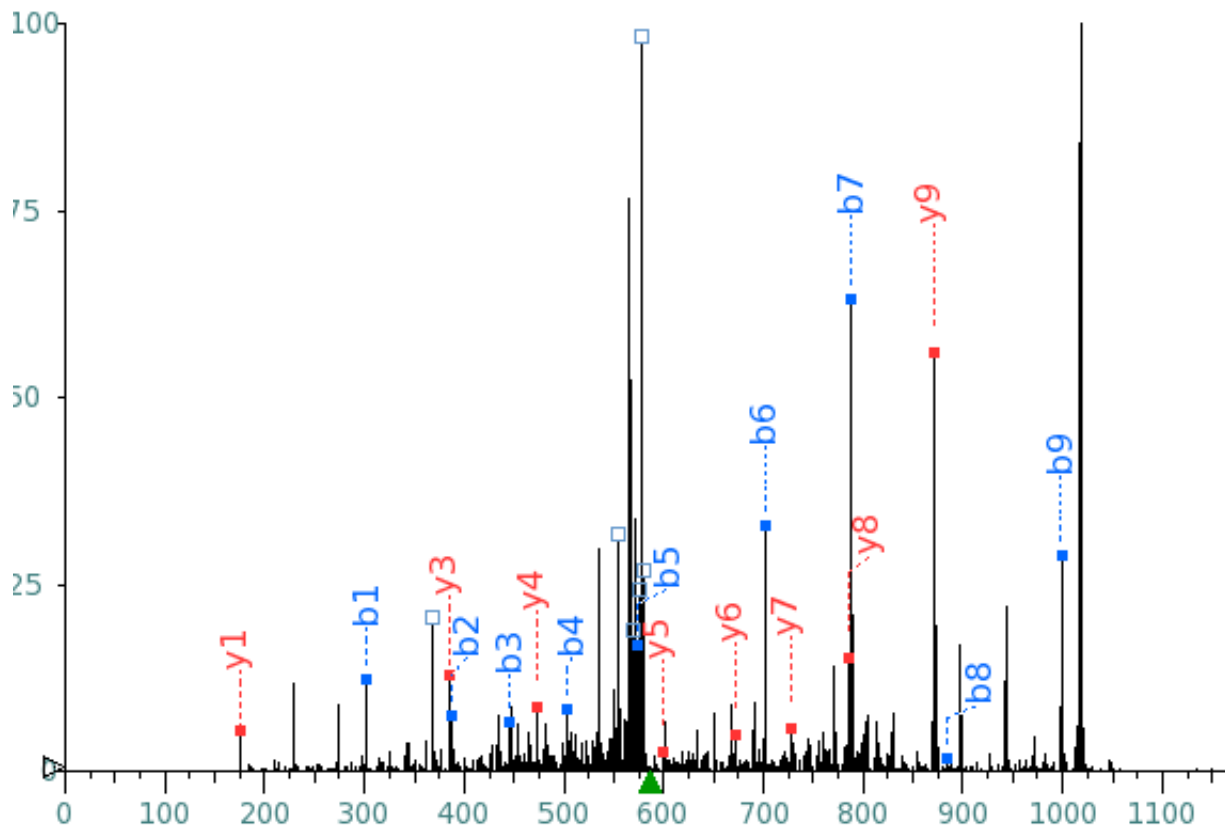

# ASGGAQSPLR (+2)

Primary Reference: ANR54\_HUMAN

Search ID: 75297

Search Name: 20141216\_QLhumanTMT6lowres\_Obj15720\_CETSA\_1203\_Set2\_Fraction\_08

Scan#: 9541

Observed Mass: 586.8352 (3.9 ppm)

PSM Score: 22.54

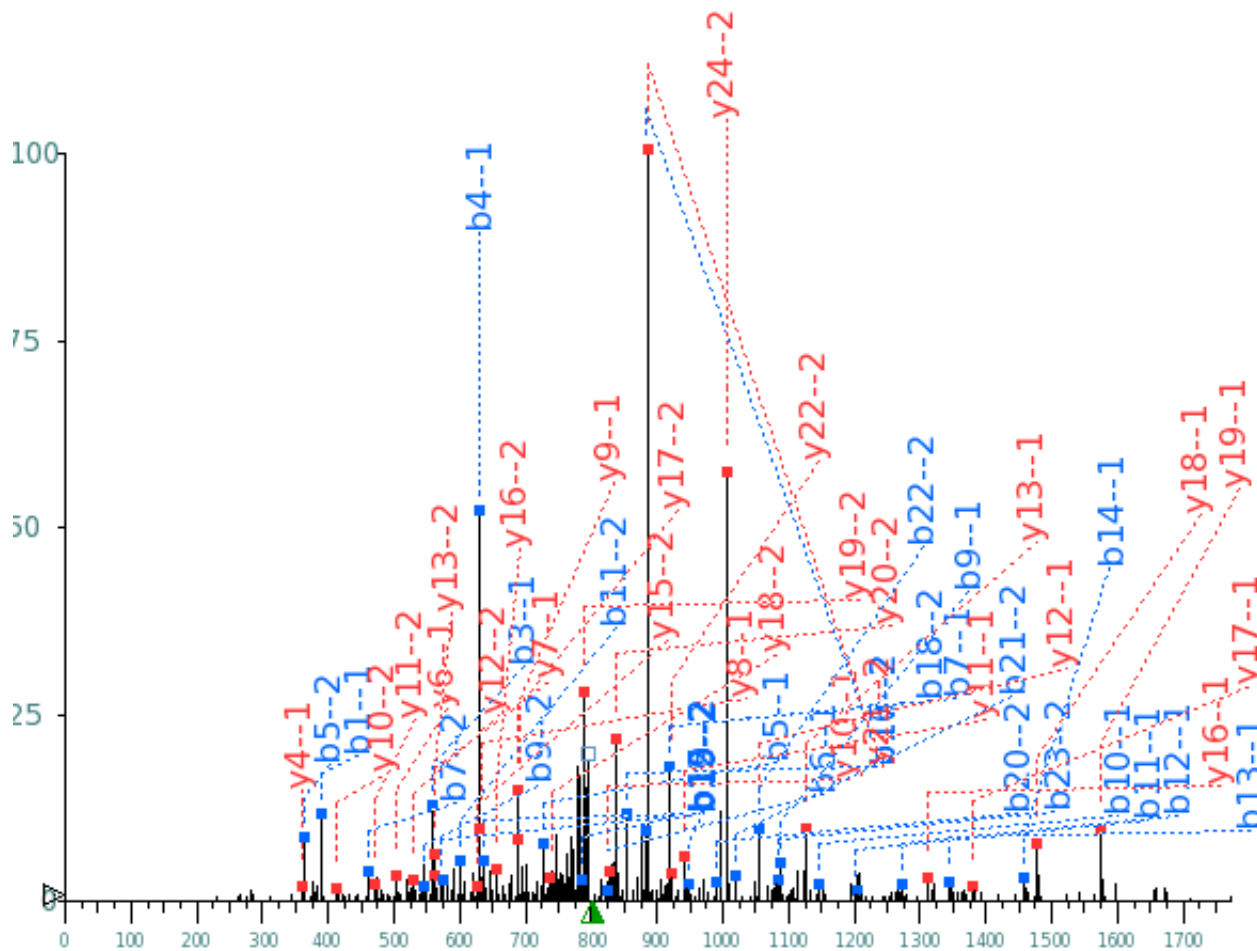

# CPAAPPPPAGGAANNHGAGSGAGGR (+3)

Primary Reference: Q96GF2\_HUMAN

Search ID: 75297

Search Name: 20141216\_QLhumanTMT6lowres\_Obj15720\_CETSA\_1203\_Set2\_Fraction\_08

Scan#: 10187

Observed Mass: 800.0604 (1.4 ppm)

PSM Score: 51.55

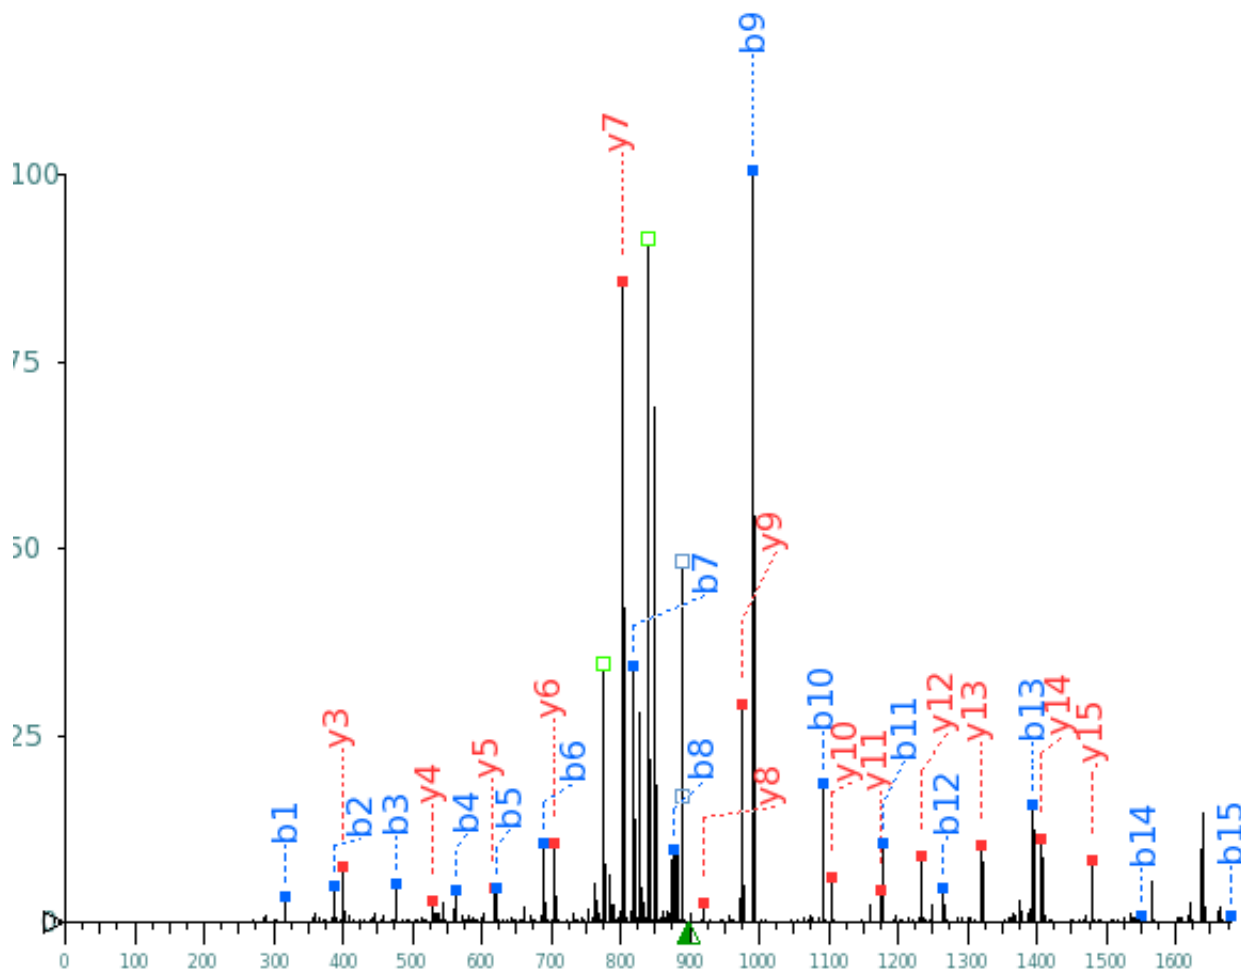

# SASSGAEGDVSSREP (+2)

Primary Reference: DTD1\_HUMAN

Search ID: 75297

Search Name: 20141216\_QLhumanTMT6lowres\_Obj15720\_CETSA\_1203\_Set2\_Fraction\_08

Scan#: 10665

Observed Mass: 897.4216 (0.4 ppm)

PSM Score: 77.9

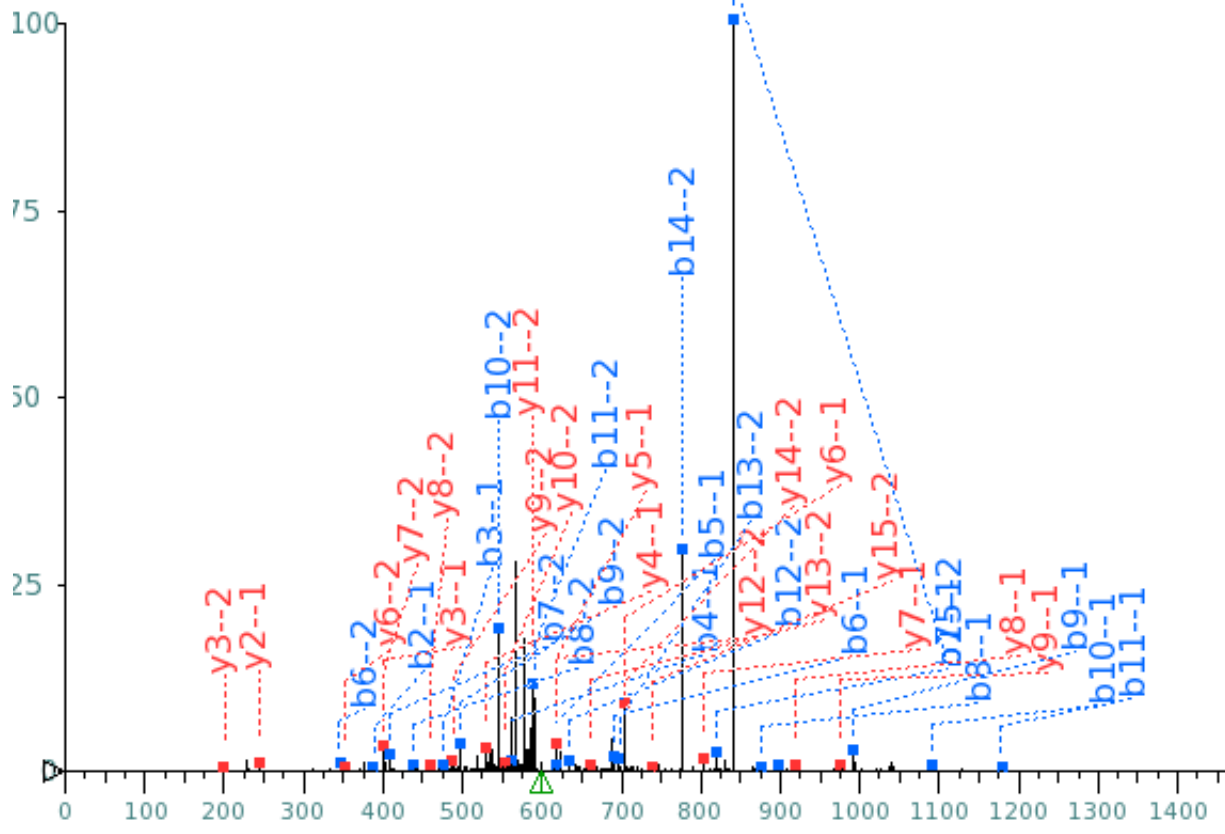

# SASSGAEGDVSSREP (+3)

Primary Reference: DTD1\_HUMAN

Search ID: 75297

Search Name: 20141216\_QLhumanTMT6lowres\_Obj15720\_CETSA\_1203\_Set2\_Fraction\_08

Scan#: 10747

Observed Mass: 598.6173 (1.3 ppm)

PSM Score: 33.43



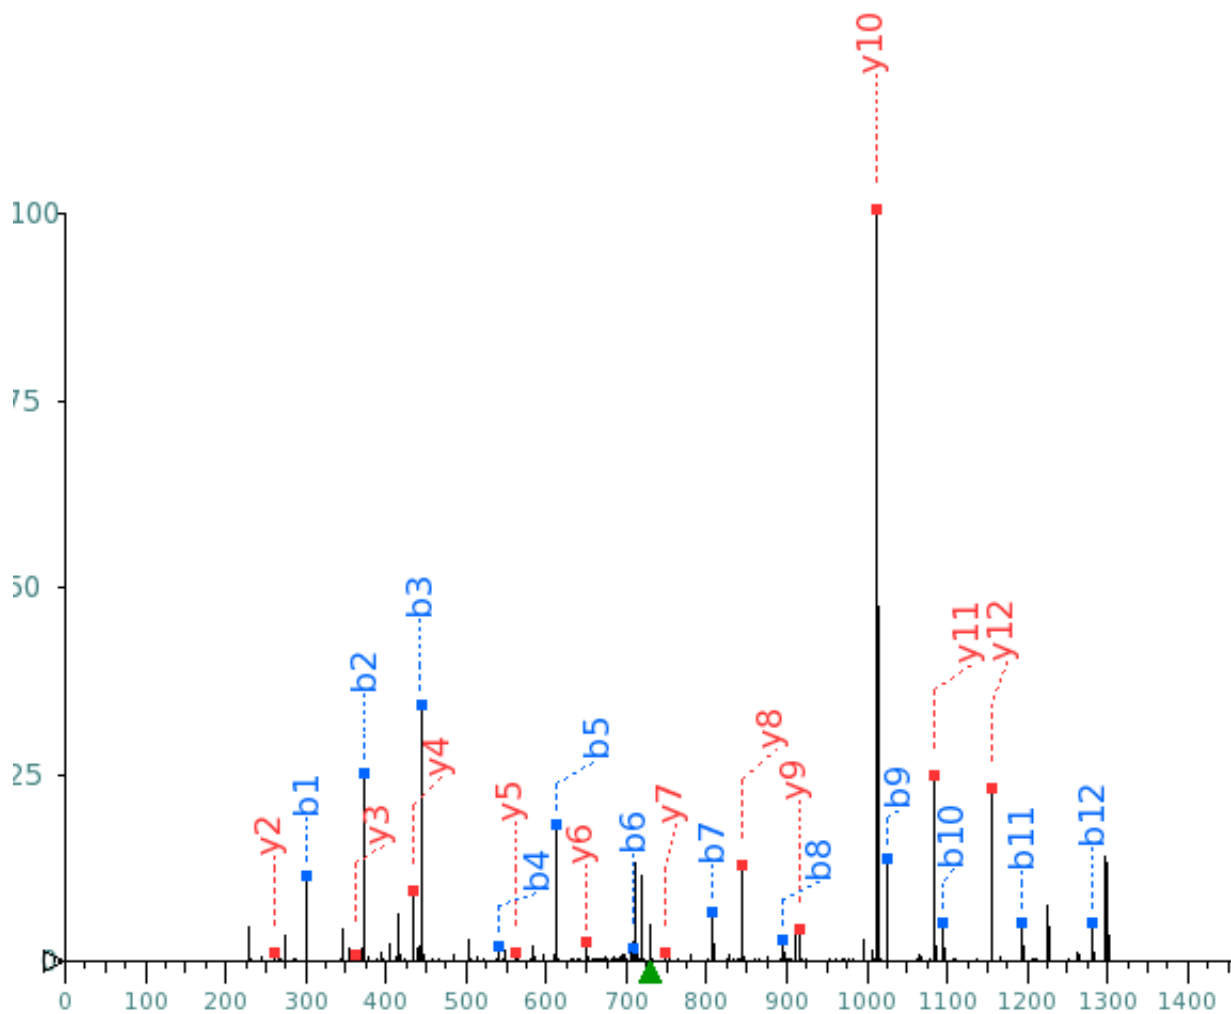

# AAAPAPVSEAVSR (+2)

Primary Reference: A8K8C4\_HUMAN

Search ID: 75297

Search Name: 20141216\_QLhumanTMT6lowres\_Obj15720\_CETSA\_1203\_Set2\_Fraction\_08

Scan#: 14960

Observed Mass: 727.9129 (1.4 ppm)

PSM Score: 47.63

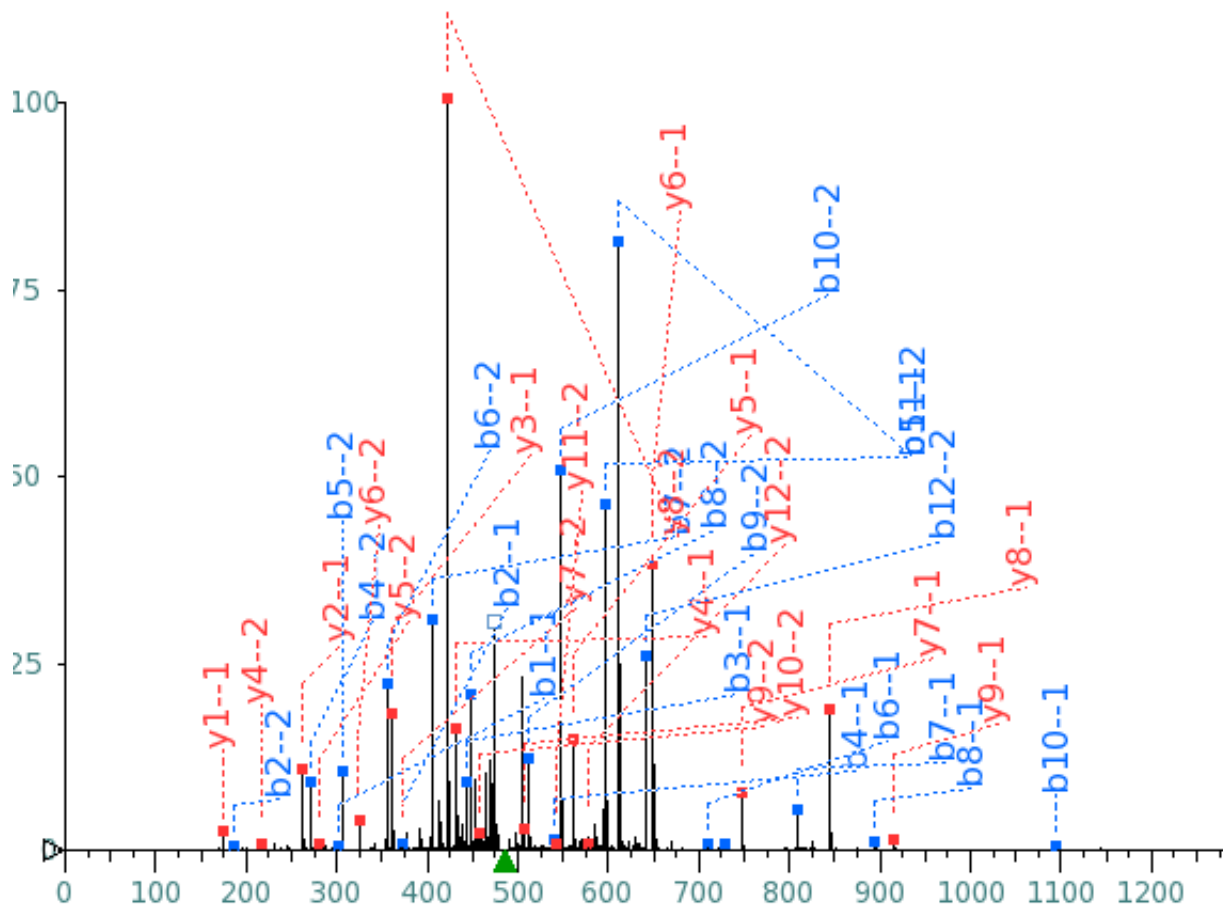

# AAAPAPVSEAVSR (+3)

Primary Reference: A8K8C4\_HUMAN

Search ID: 75297

Search Name: 20141216\_QLhumanTMT6lowres\_Obj15720\_CETSA\_1203\_Set2\_Fraction\_08

Scan#: 15048

Observed Mass: 485.6113 (2 ppm)

PSM Score: 47.07

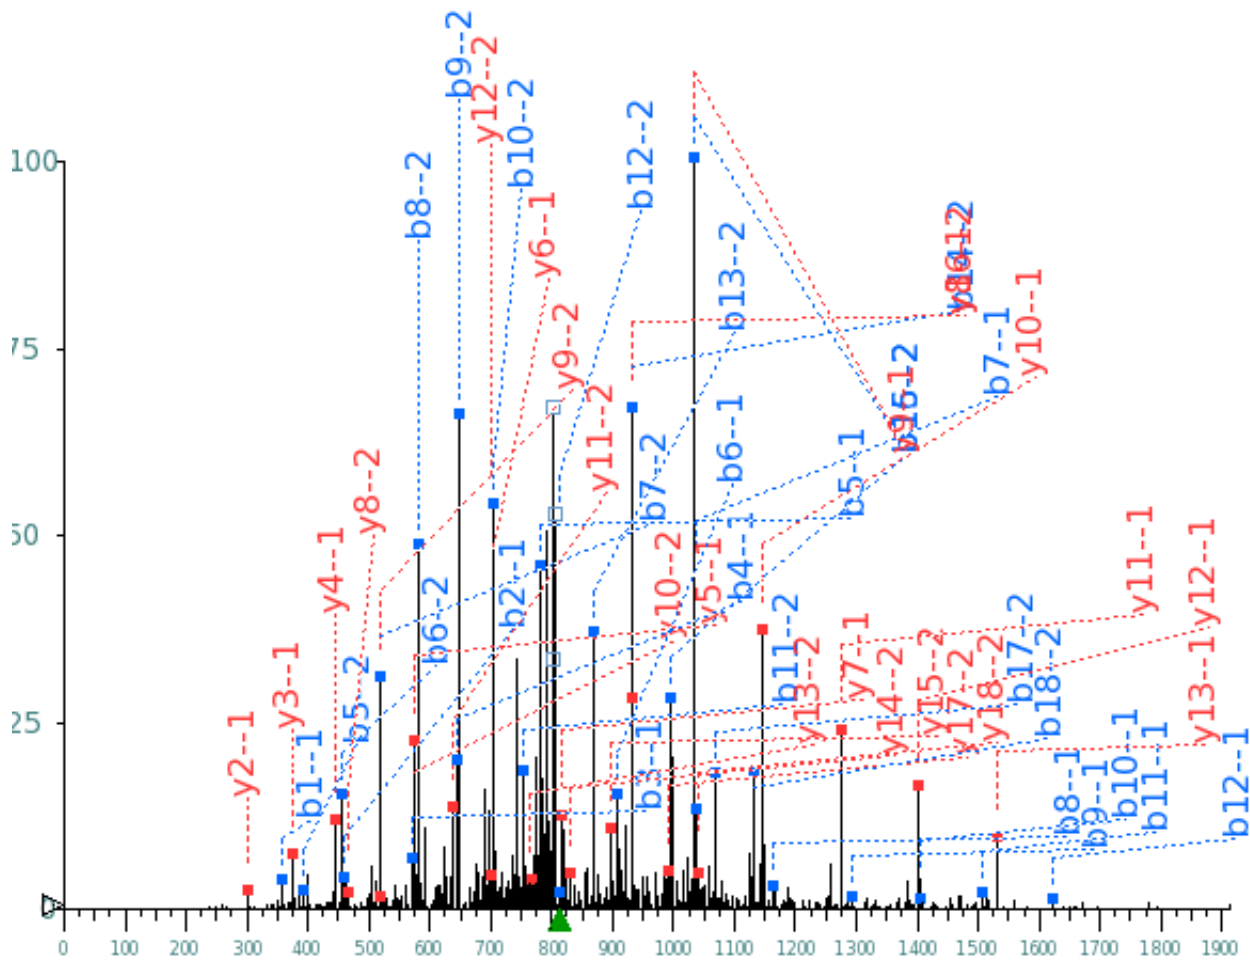

# QTIAHQQQLTNLQMAAQR (+3)

Primary Reference: E9PMU7\_HUMAN

Search ID: 75297

Search Name: 20141216\_QLhumanTMT6lowres\_Obj15720\_CETSA\_1203\_Set2\_Fraction\_08

Scan#: 18754

Observed Mass: 813.1035 (1.2 ppm)

PSM Score: 66.34

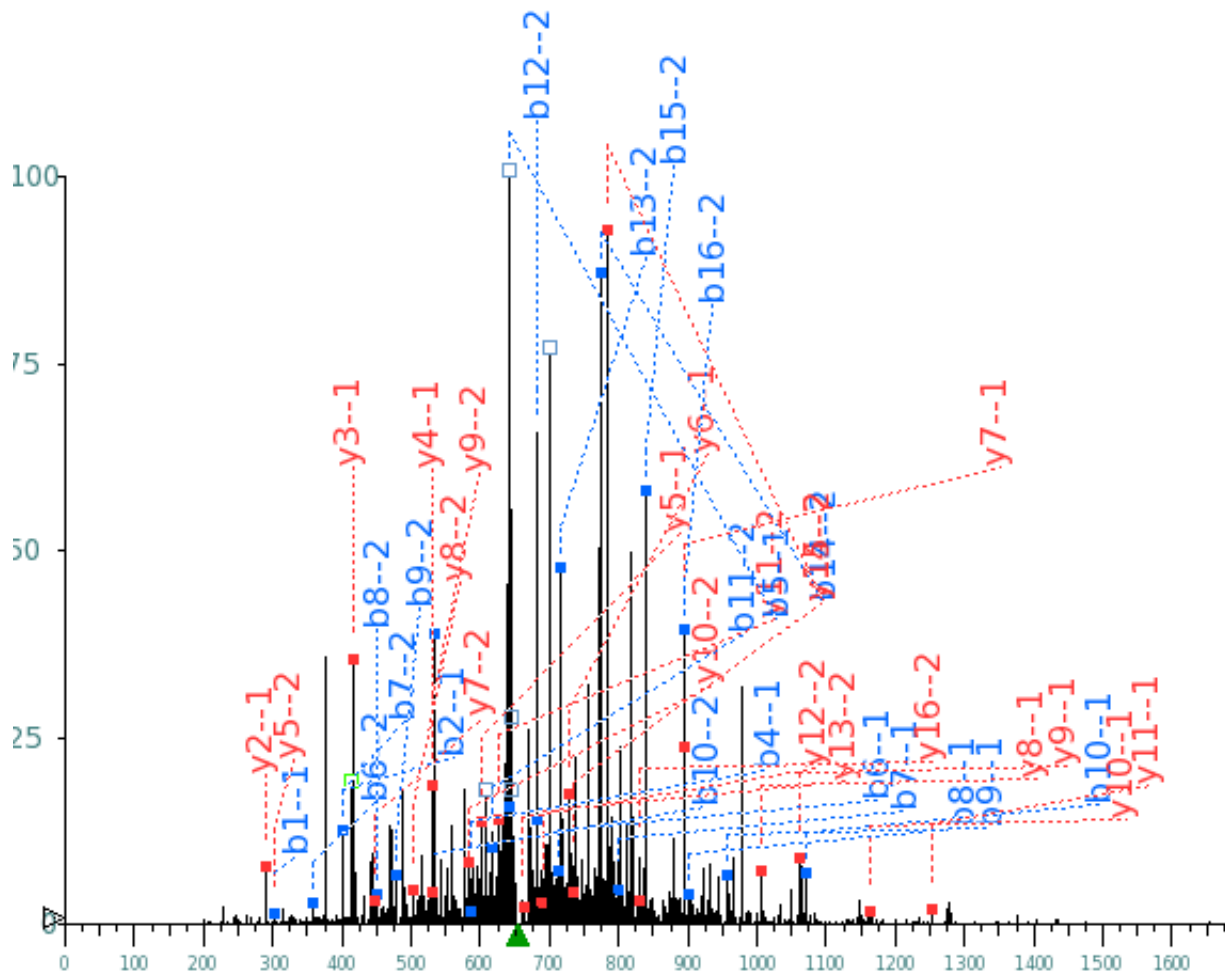

# AVPSGASTGIYEALRLR (+3)

Primary Reference: A4UCS8\_HUMAN

Search ID: 75297

Search Name: 20141216\_QLhumanTMT6lowres\_Obj15720\_CETSA\_1203\_Set2\_Fraction\_08

Scan#: 32015

Observed Mass: 655.0281 (-0.1 ppm)

PSM Score: 21.84

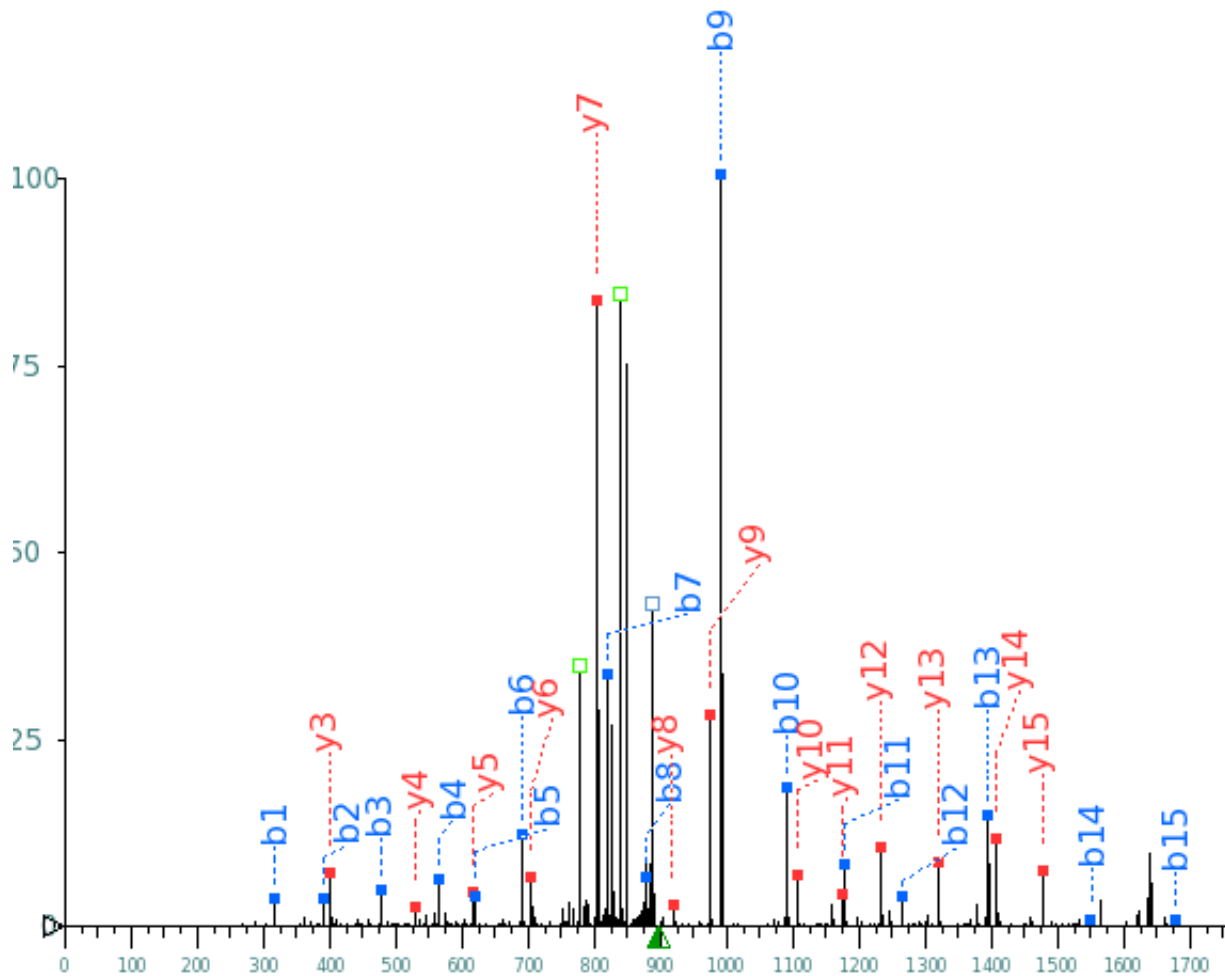

# SASSGAEGDVSSREP (+2)

Primary Reference: DTD1\_HUMAN

Search ID: 75307

Search Name: 20141216\_QLhumanTMT6lowres\_Obj15720\_CETSA\_1203\_Set2\_Fraction\_09

Scan#: 10527

Observed Mass: 897.4228 (1.8 ppm)

PSM Score: 81.98

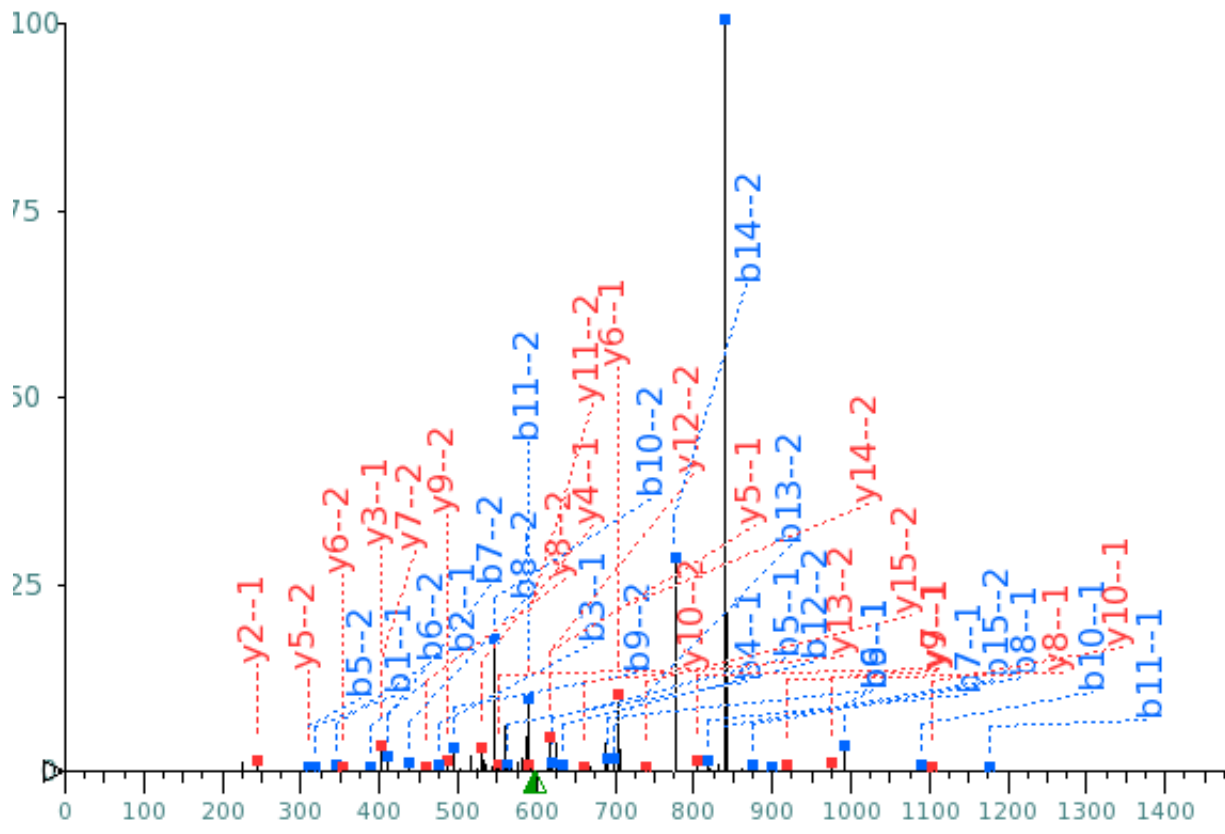

# SASSGAEGDVSSREP (+3)

Primary Reference: DTD1\_HUMAN

Search ID: 75307

Search Name: 20141216\_QLhumanTMT6lowres\_Obj15720\_CETSA\_1203\_Set2\_Fraction\_09

Scan#: 10532

Observed Mass: 598.6176 (1.8 ppm)

PSM Score: 47.11

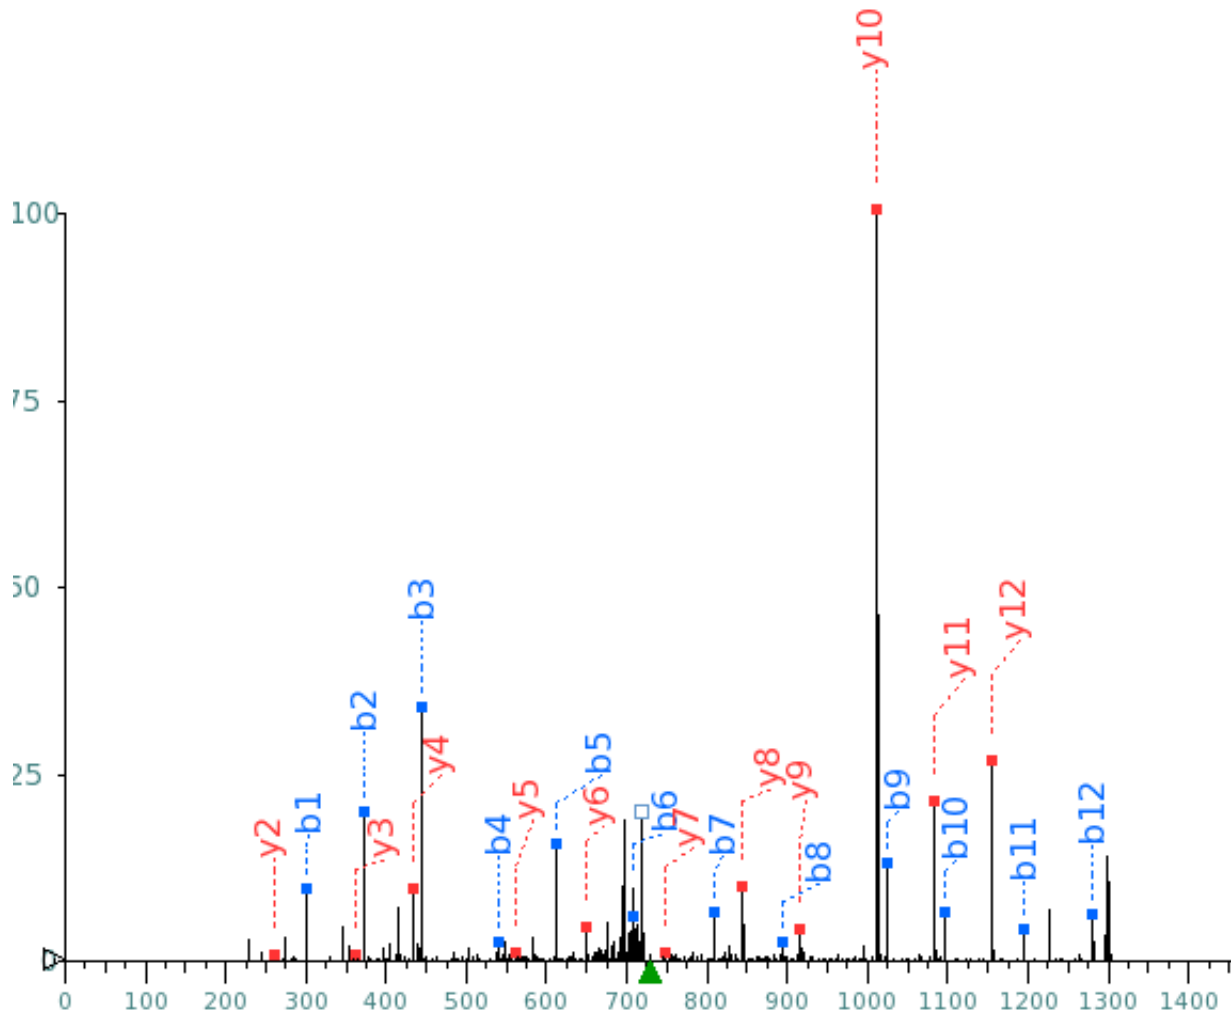

# AAAPAPVSEAVSR (+2)

Primary Reference: A8K8C4\_HUMAN

Search ID: 75307

Search Name: 20141216\_QLhumanTMT6lowres\_Obj15720\_CETSA\_1203\_Set2\_Fraction\_09

Scan#: 14951

Observed Mass: 727.9129 (1.5 ppm)

PSM Score: 68.16

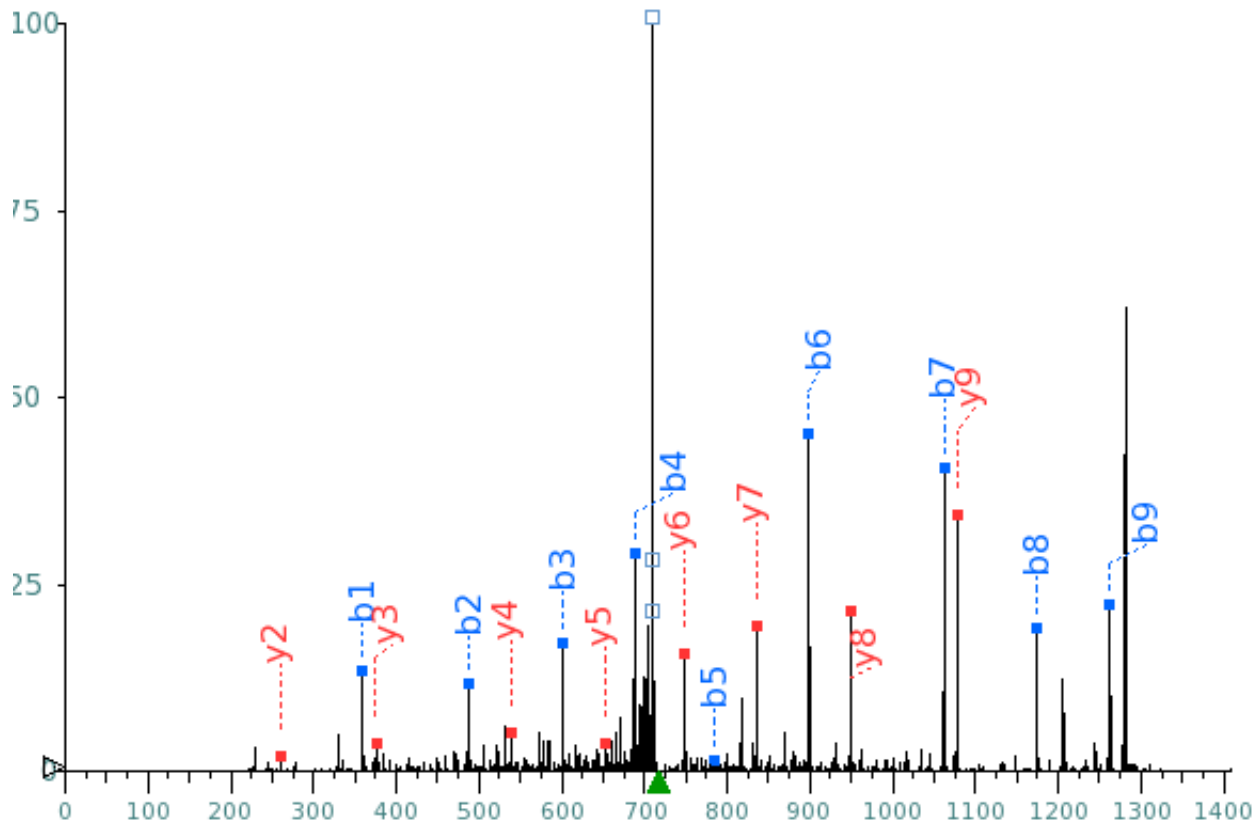

# EQNSPIYISR (+2)

Primary Reference: LIN7A\_HUMAN

Search ID: 75307

Search Name: 20141216\_QLhumanTMT6lowres\_Obj15720\_CETSA\_1203\_Set2\_Fraction\_09

Scan#: 15835

Observed Mass: 718.392 (1.7 ppm)

PSM Score: 42.11



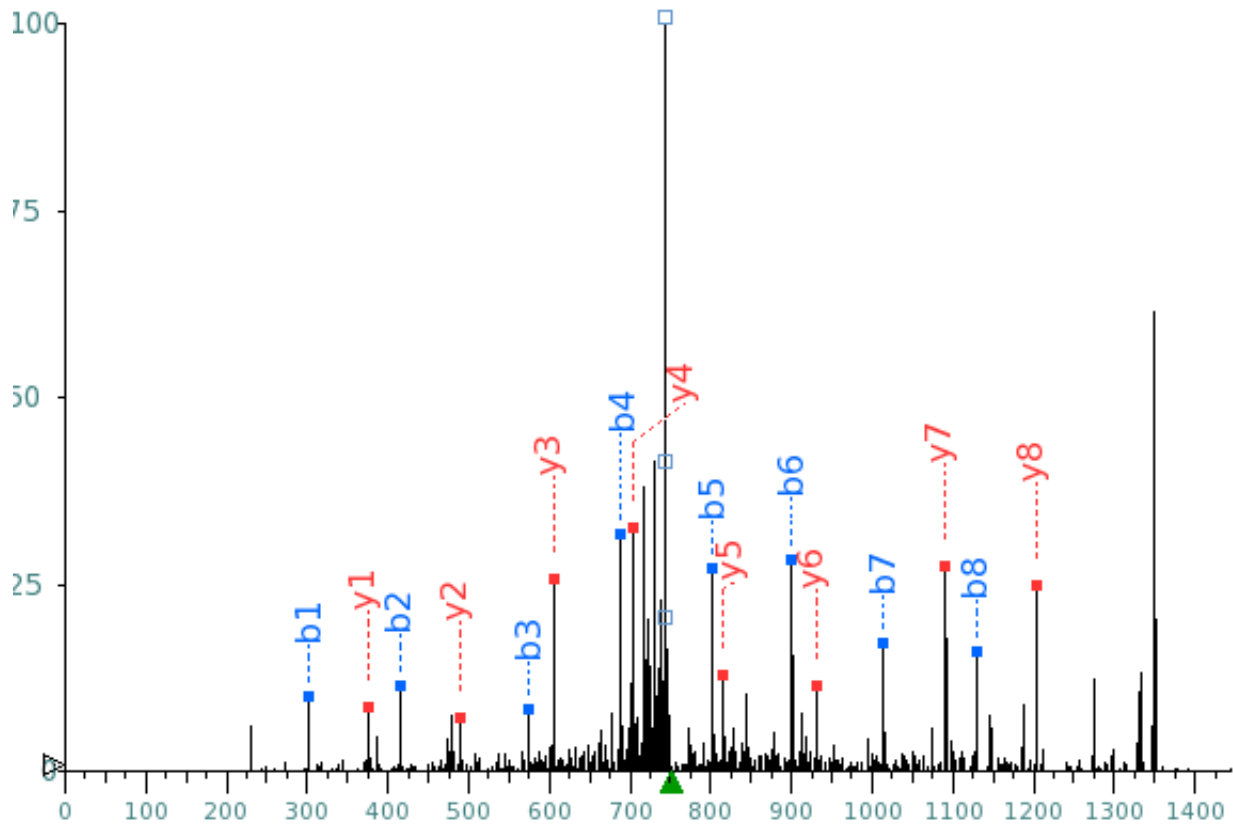

# ALCNIVNNK (+2)

Primary Reference: HUS1\_HUMAN  
 Search ID: 75310

Search Name: 20141216\_QLhumanTMT6lowres\_Obj15720\_CETSA\_1203\_Set2\_Fraction\_10  
 Scan#: 20965

Observed Mass: 752.4406 (1.4 ppm)  
 PSM Score: 26.65

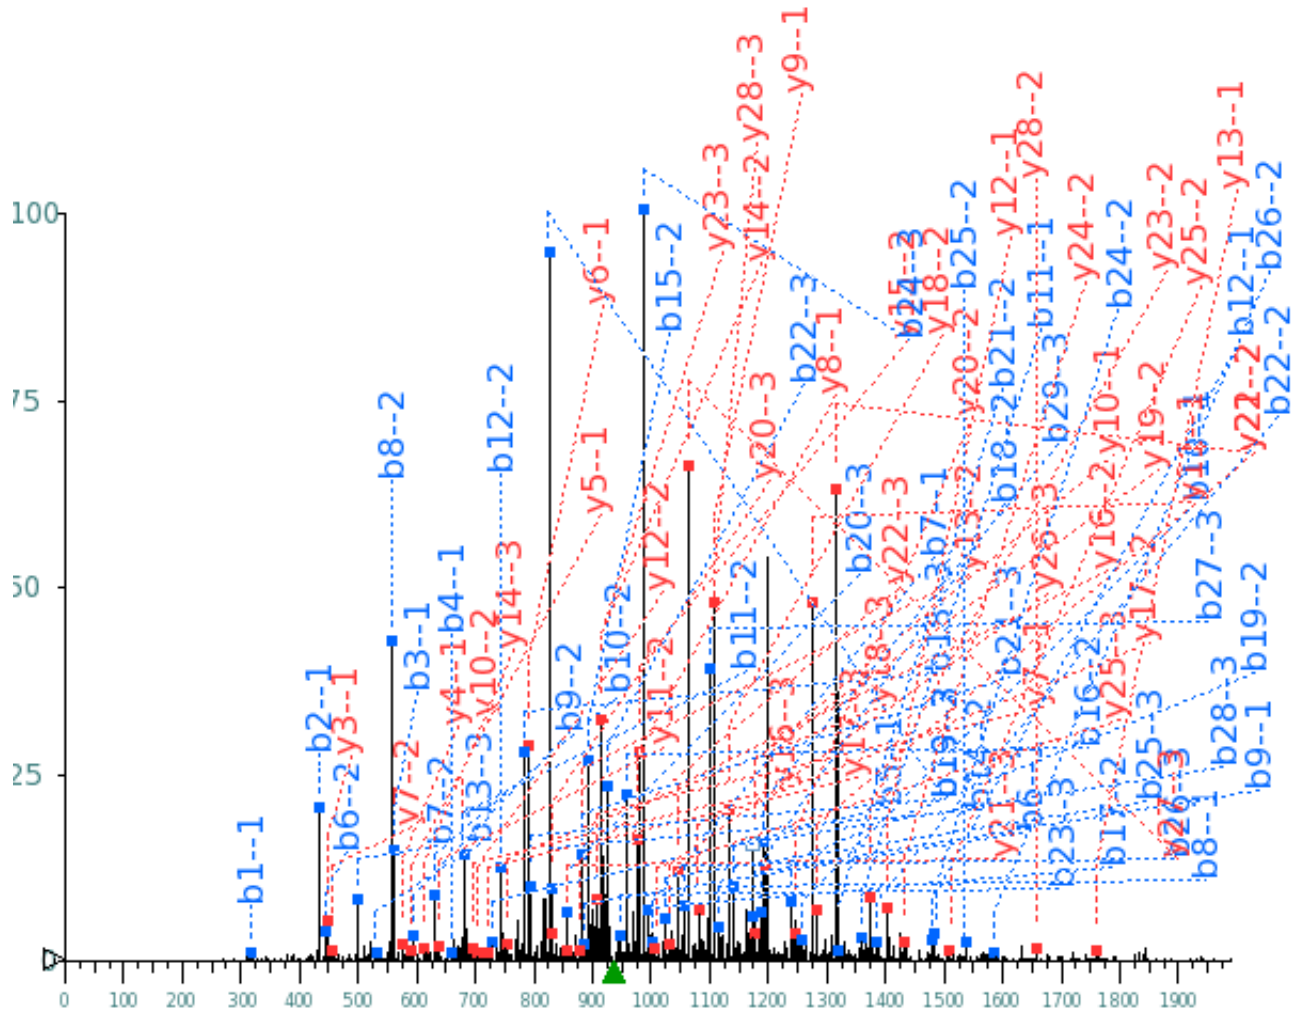

# SDEPARDDAAVETAEAKEPAEADITELCR (+4)

Primary Reference: BL1S2\_HUMAN

Search ID: 75313

Search Name: 20141216\_QLhumanTMT6lowres\_Obj15720\_CETSA\_1203\_Set2\_Fraction\_11

Scan#: 28286

Observed Mass: 937.4575 (0.4 ppm)

PSM Score: 36.7

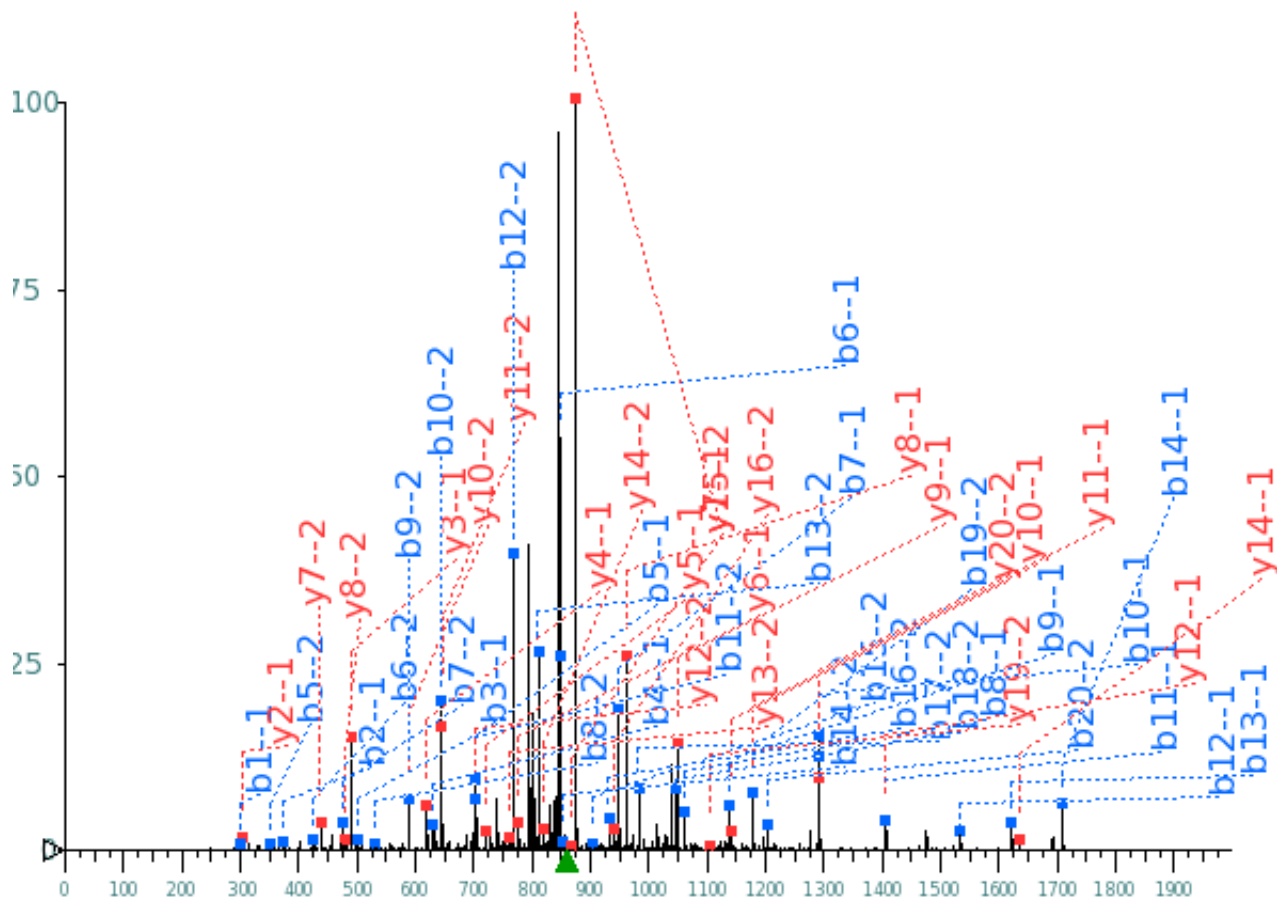

# AAEEAFVNDIDESSPGTEWER (+3)

Primary Reference: F5H6N3\_HUMAN

Search ID: 75315

Search Name: 20141216\_QLhumanTMT6lowres\_Obj15720\_CETSA\_1203\_Set2\_Fraction\_12

Scan#: 32041

Observed Mass: 861.0676 (-0.4 ppm)

PSM Score: 71.97

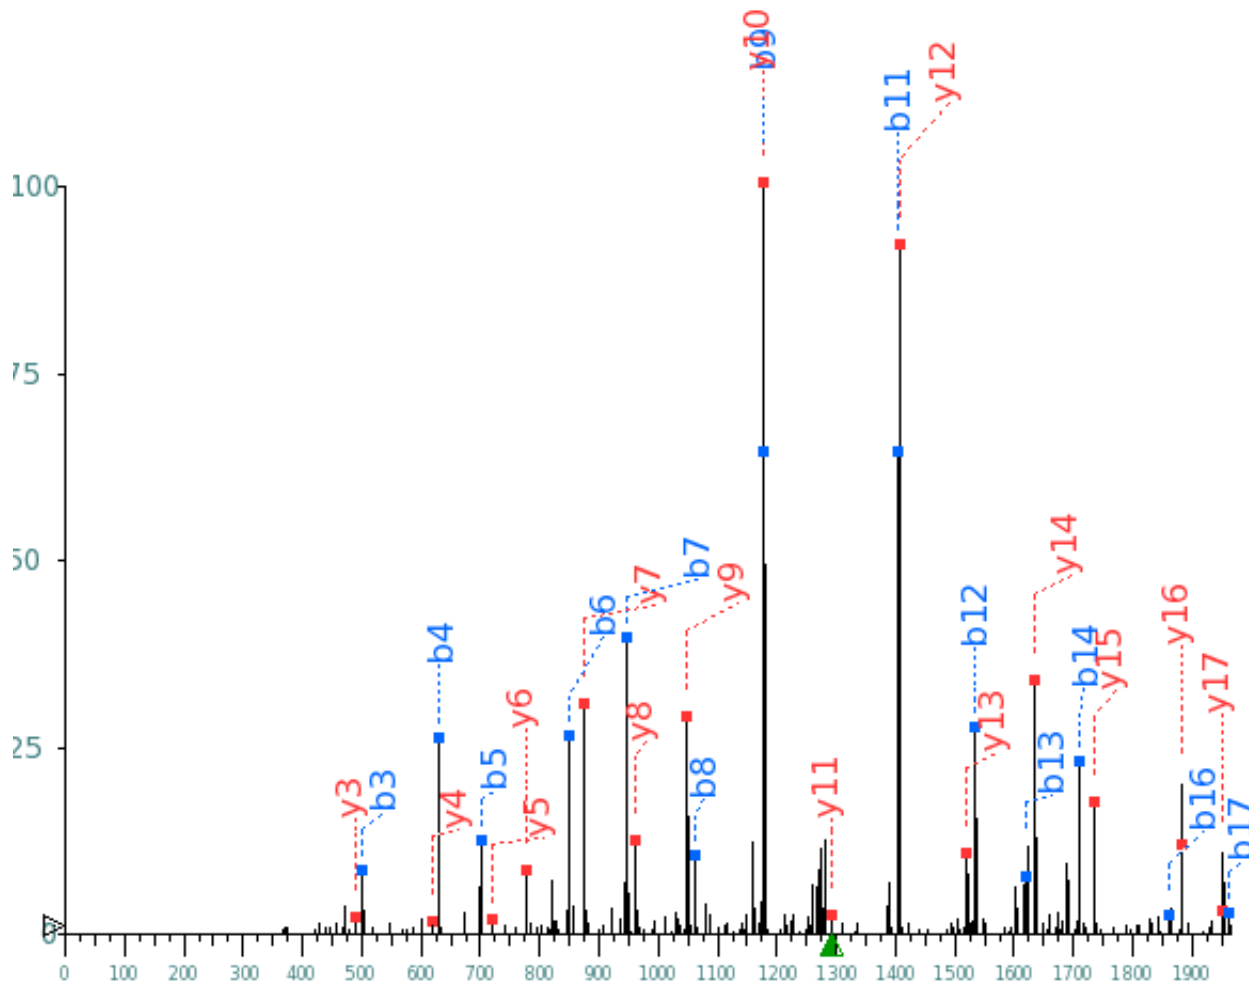

# AAEEAFVNDIDESSPGTEWER (+2)

Primary Reference: F5H6N3\_HUMAN

Search ID: 75315

Search Name: 20141216\_QLhumanTMT6lowres\_Obj15720\_CETSA\_1203\_Set2\_Fraction\_12

Scan#: 32056

Observed Mass: 1291.0972 (-0.8 ppm)

PSM Score: 73.31

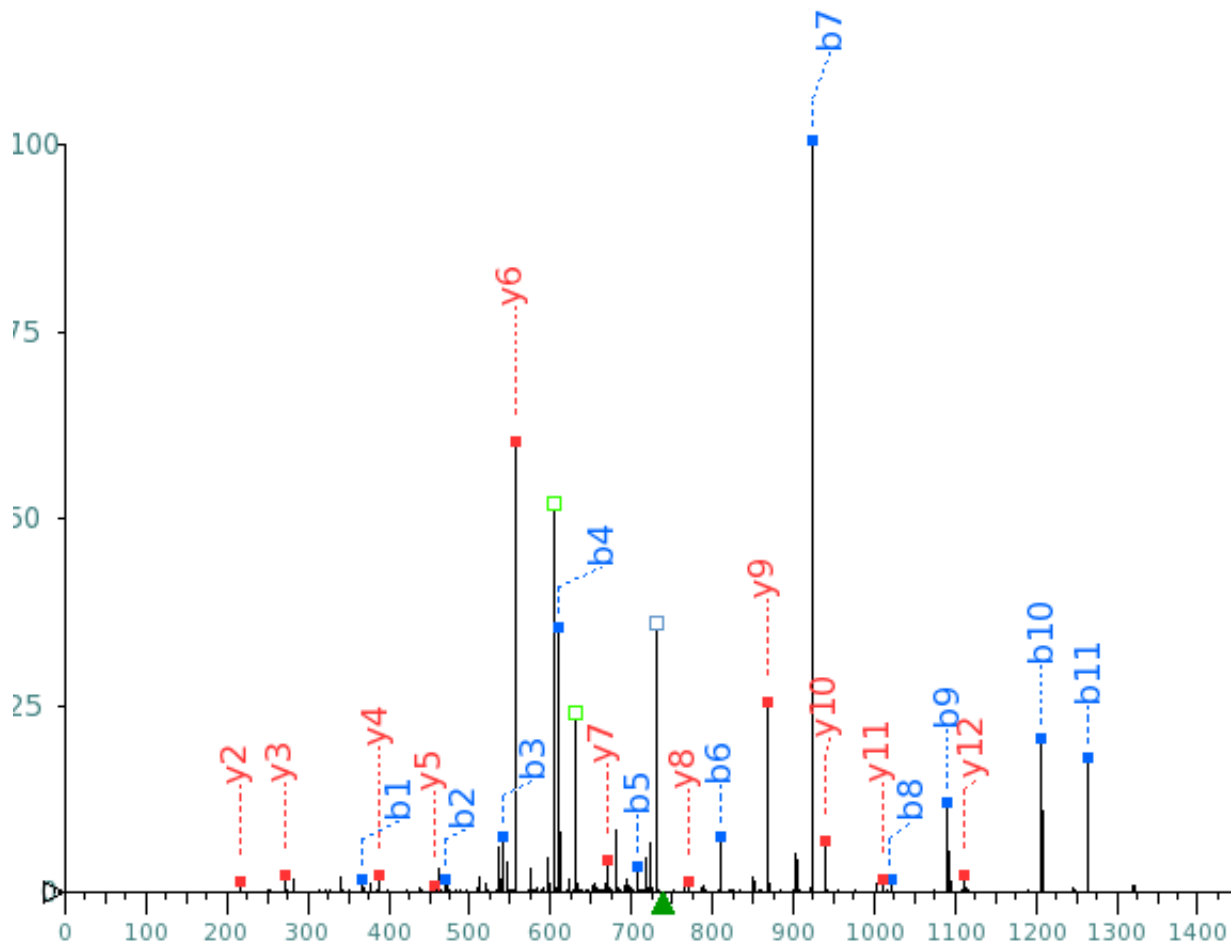

# HTAAPTDPADGPV (+2)

Primary Reference: PLP2\_HUMAN

Search ID: 75316

Search Name: 20141216\_QLhumanTMT6lowres\_Obj15720\_CETSA\_1203\_Set2\_Fraction\_13

Scan#: 12782

Observed Mass: 739.3787 (1.1 ppm)

PSM Score: 71.32

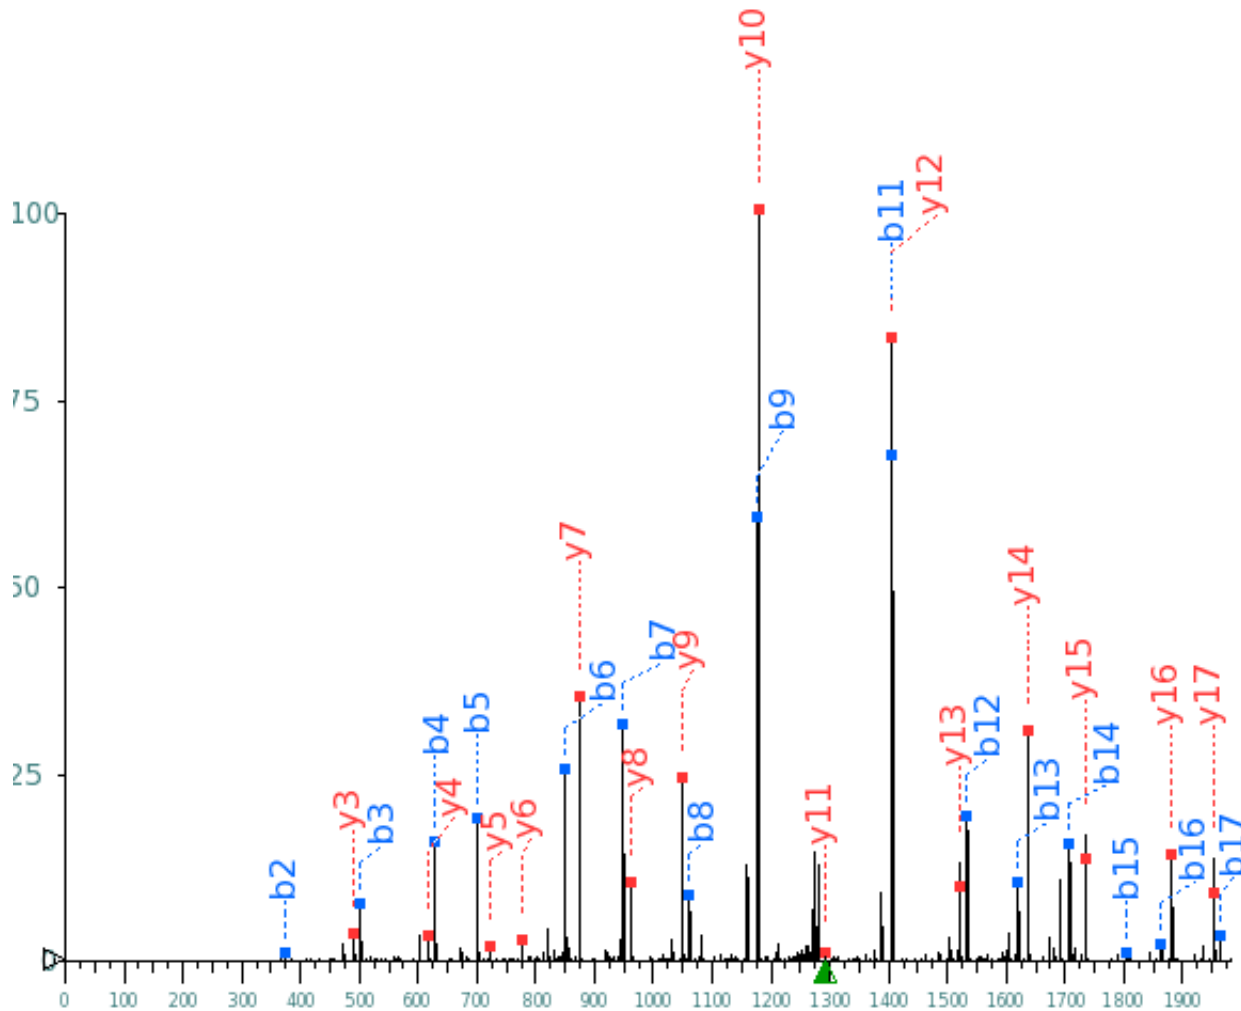

# AAEEAFVNDIDESSPGTEWER (+2)

Primary Reference: F5H6N3\_HUMAN

Search ID: 75316

Search Name: 20141216\_QLhumanTMT6lowres\_Obj15720\_CETSA\_1203\_Set2\_Fraction\_13

Scan#: 32258

Observed Mass: 1291.0977 (-0.4 ppm)

PSM Score: 67.83

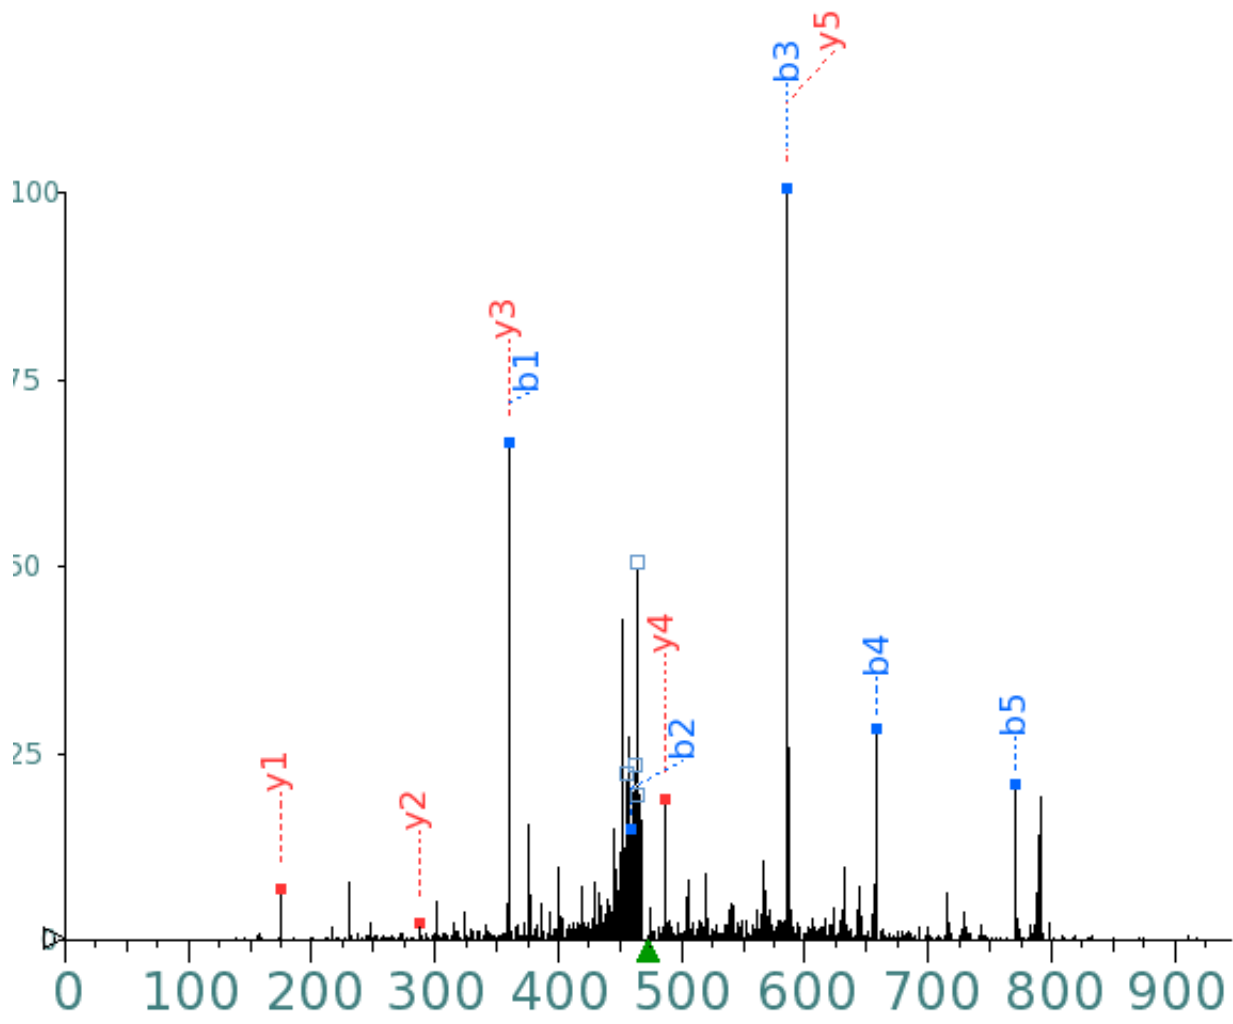

# EVQALR (+2)

Primary Reference: TARA\_HUMAN

Search ID: 75317

Search Name: 20141216\_QLhumanTMT6lowres\_Obj15720\_CETSA\_1203\_Set2\_Fraction\_14

Scan#: 11677

Observed Mass: 472.7906 (1.3 ppm)

PSM Score: 20.63

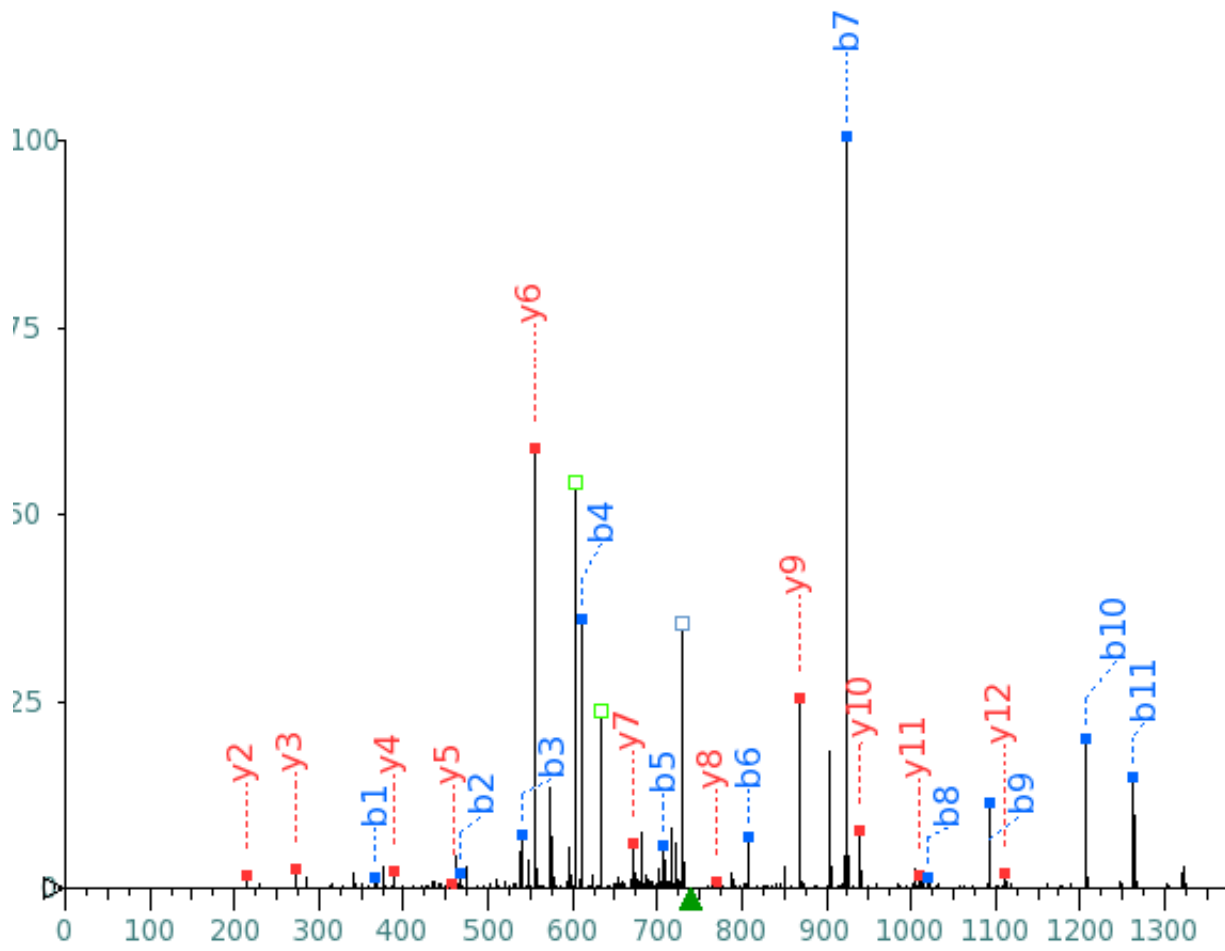

# HTAAPTDPADGPV (+2)

Primary Reference: PLP2\_HUMAN

Search ID: 75317

Search Name: 20141216\_QLhumanTMT6lowres\_Obj15720\_CETSA\_1203\_Set2\_Fraction\_14

Scan#: 12646

Observed Mass: 739.3794 (2 ppm)

PSM Score: 54.86



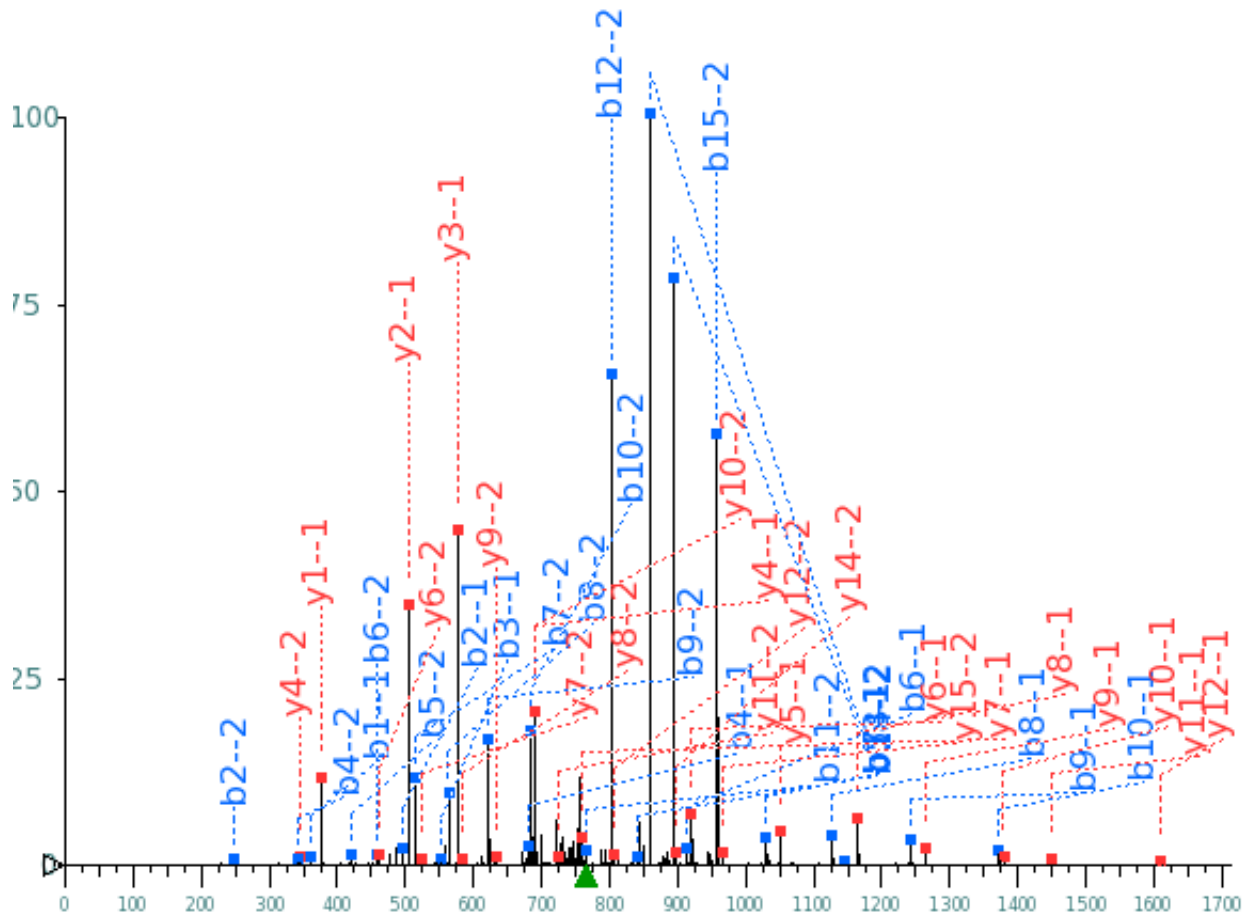

# EHGQCADVDECALAEK (+3)

Primary Reference: Q659B4\_HUMAN

Search ID: 75317

Search Name: 20141216\_QLhumanTMT6lowres\_Obj15720\_CETSA\_1203\_Set2\_Fraction\_14

Scan#: 15939

Observed Mass: 764.0338 (1.1 ppm)

PSM Score: 58.11

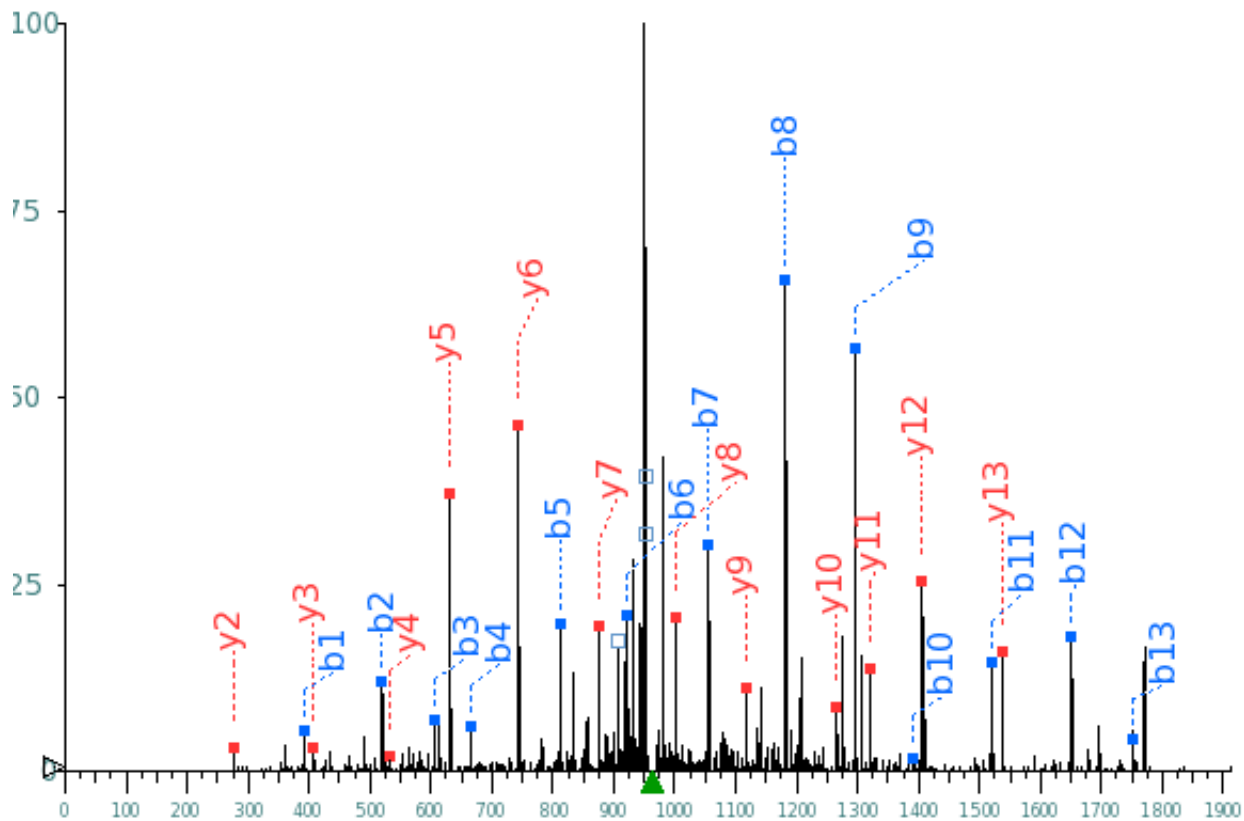

# CESGFIEELPEETR (+2)

Primary Reference: RN126\_HUMAN

Search ID: 75317

Search Name: 20141216\_QLhumanTMT6lowres\_Obj15720\_CETSA\_1203\_Set2\_Fraction\_14

Scan#: 25359

Observed Mass: 962.9613 (-0.3 ppm)

PSM Score: 36.78

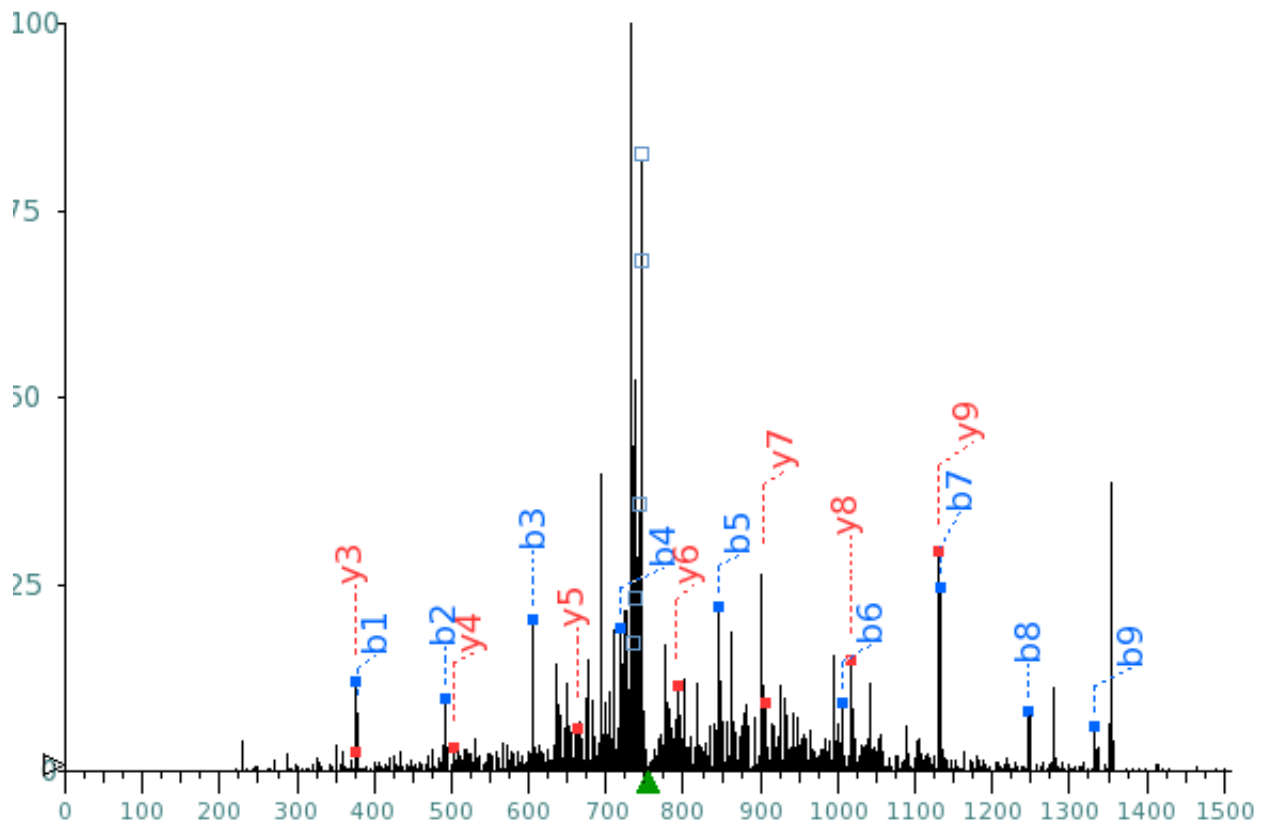

# FLNIQCQLSR (+2)

Primary Reference: ERI1\_HUMAN

Search ID: 75317

Search Name: 20141216\_QLhumanTMT6lowres\_Obj15720\_CETSA\_1203\_Set2\_Fraction\_14

Scan#: 26646

Observed Mass: 754.417 (1 ppm)

PSM Score: 16.3

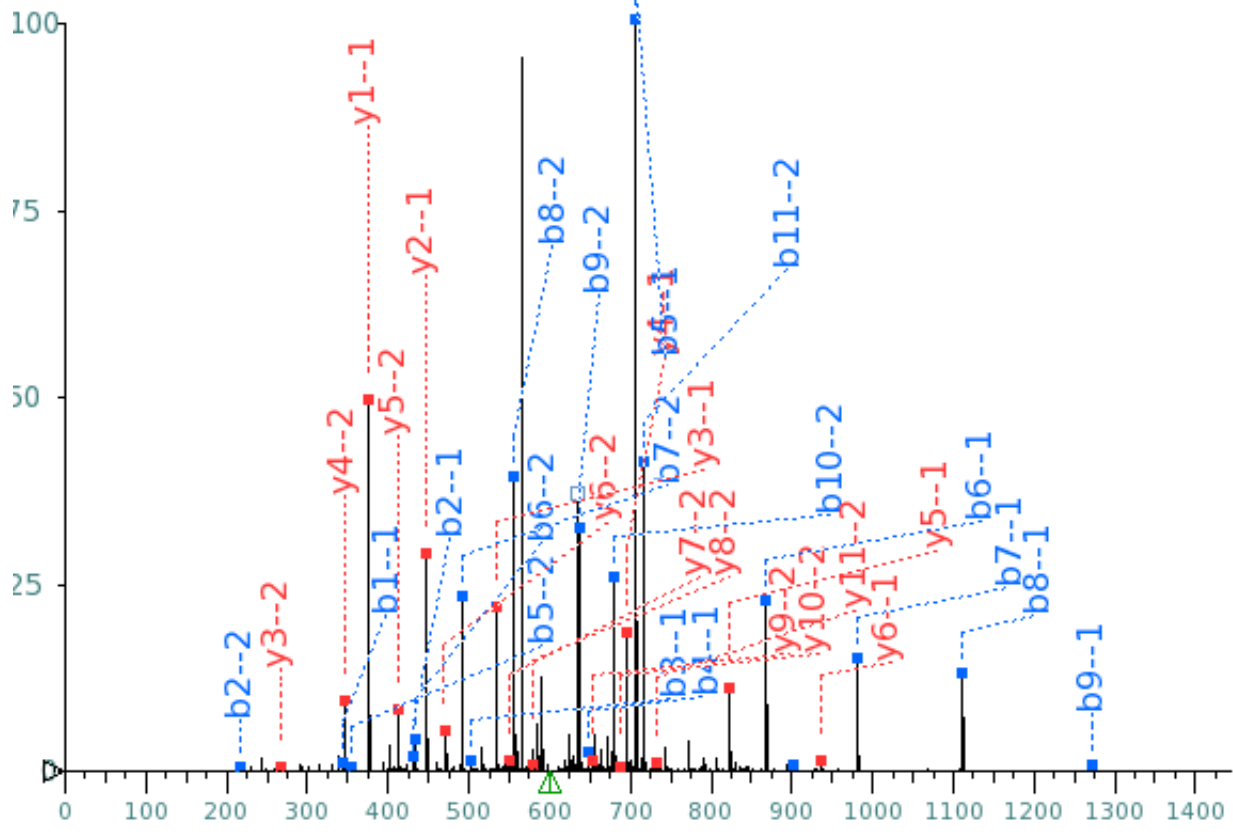

# ISAFGYLECSAK (+3)

Primary Reference: RHOC\_HUMAN

Search ID: 75317

Search Name: 20141216\_QLhumanTMT6lowres\_Obj15720\_CETSA\_1203\_Set2\_Fraction\_14

Scan#: 30066

Observed Mass: 601.9954 (0.1 ppm)

PSM Score: 25.6

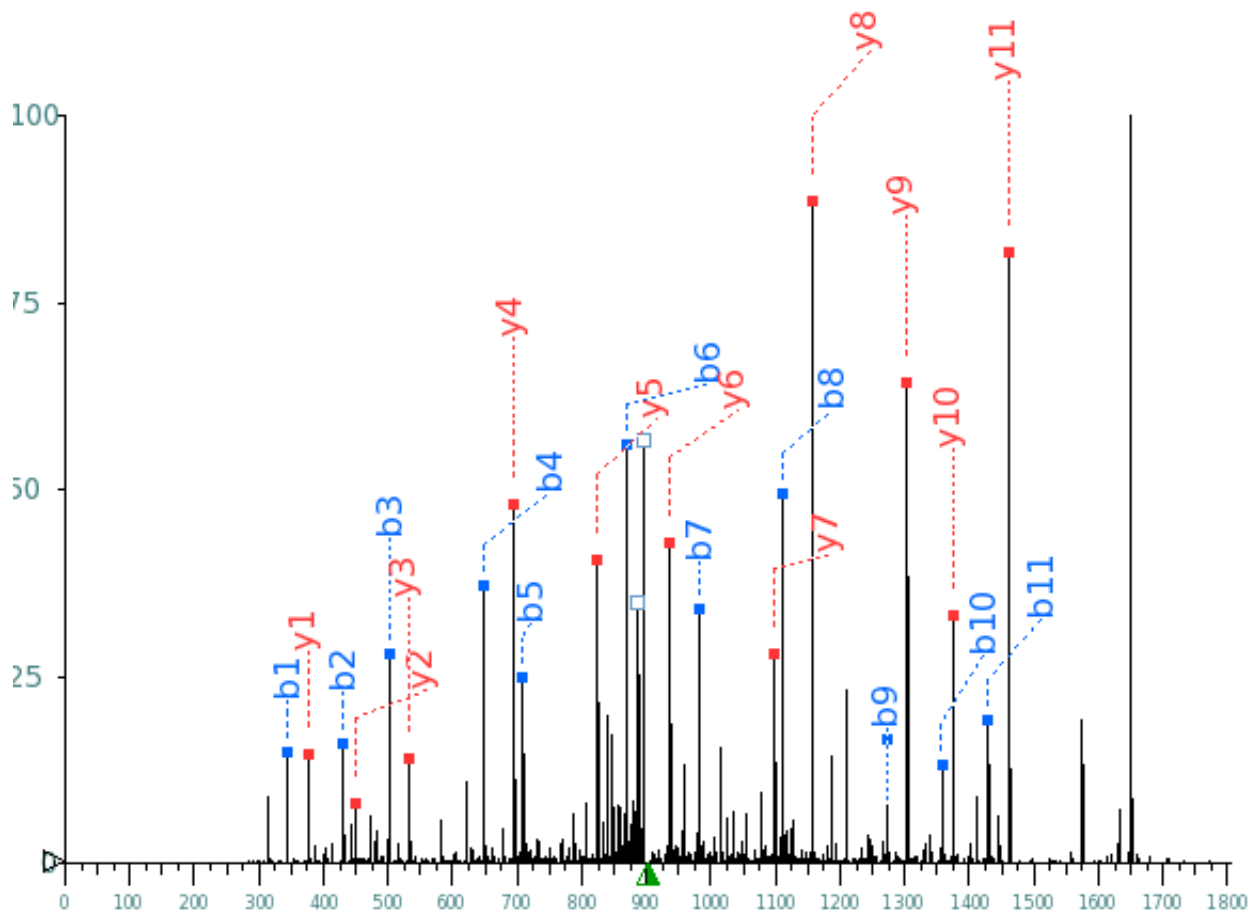

# ISAFGYLECSAK (+2)

Primary Reference: RHOC\_HUMAN

Search ID: 75317

Search Name: 20141216\_QLhumanTMT6lowres\_Obj15720\_CETSA\_1203\_Set2\_Fraction\_14

Scan#: 30084

Observed Mass: 902.4894 (0 ppm)

PSM Score: 51.51

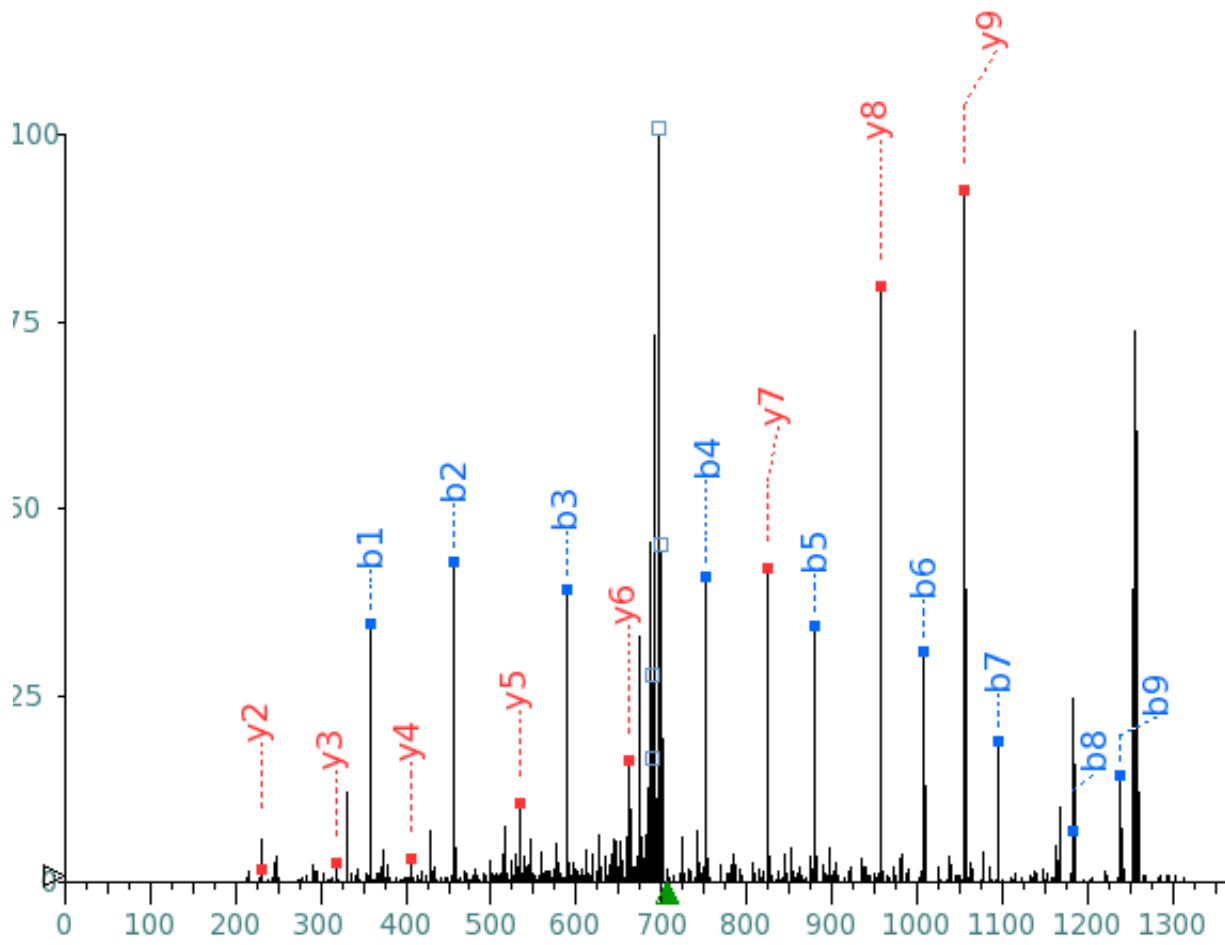

# QVMYQQSSGR (+2)

Primary Reference: EPDR1\_HUMAN

Search ID: 75318

Search Name: 20141216\_QLhumanTMT6lowres\_Obj15720\_CETSA\_1203\_Set2\_Fraction\_15

Scan#: 9920

Observed Mass: 706.8636 (3.3 ppm)

PSM Score: 33.37

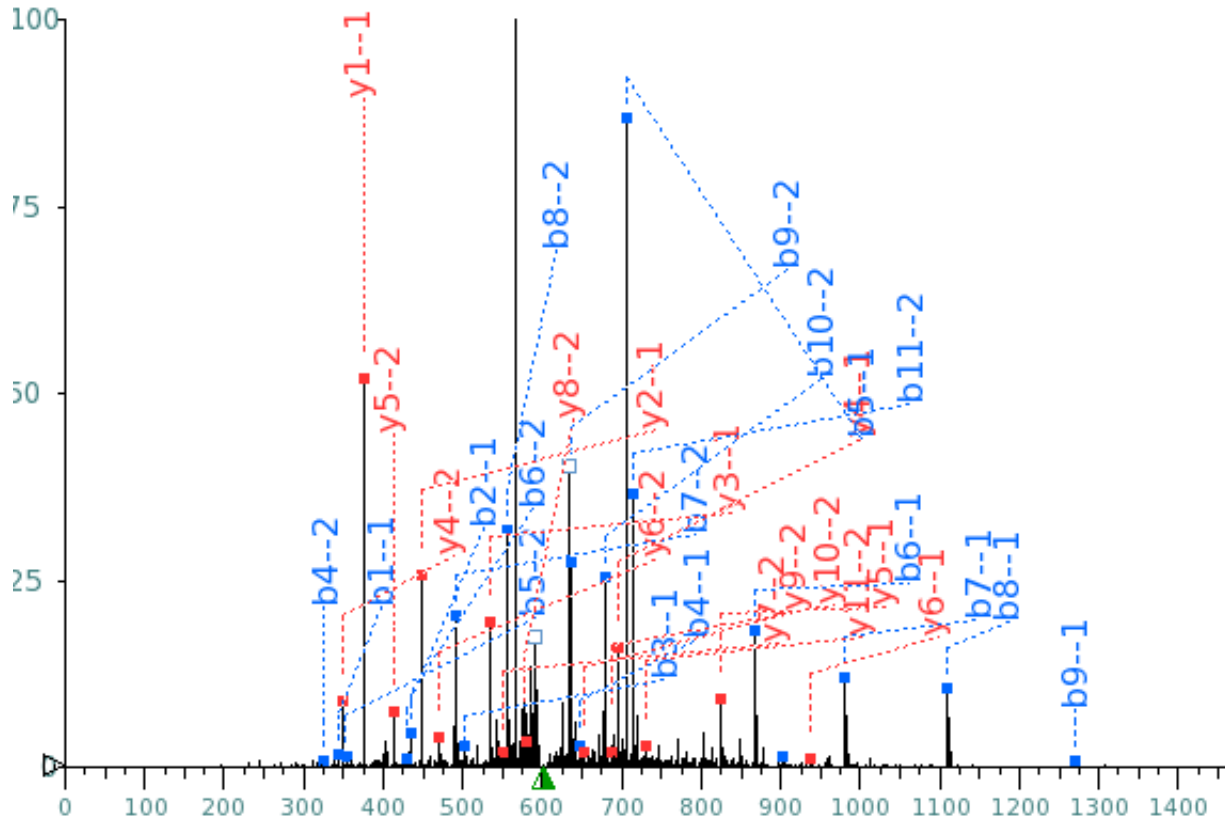

# ISAFGYLECSAK (+3)

Primary Reference: RHOC\_HUMAN

Search ID: 75318

Search Name: 20141216\_QLhumanTMT6lowres\_Obj15720\_CETSA\_1203\_Set2\_Fraction\_15

Scan#: 29648

Observed Mass: 601.9957 (0.5 ppm)

PSM Score: 22.37

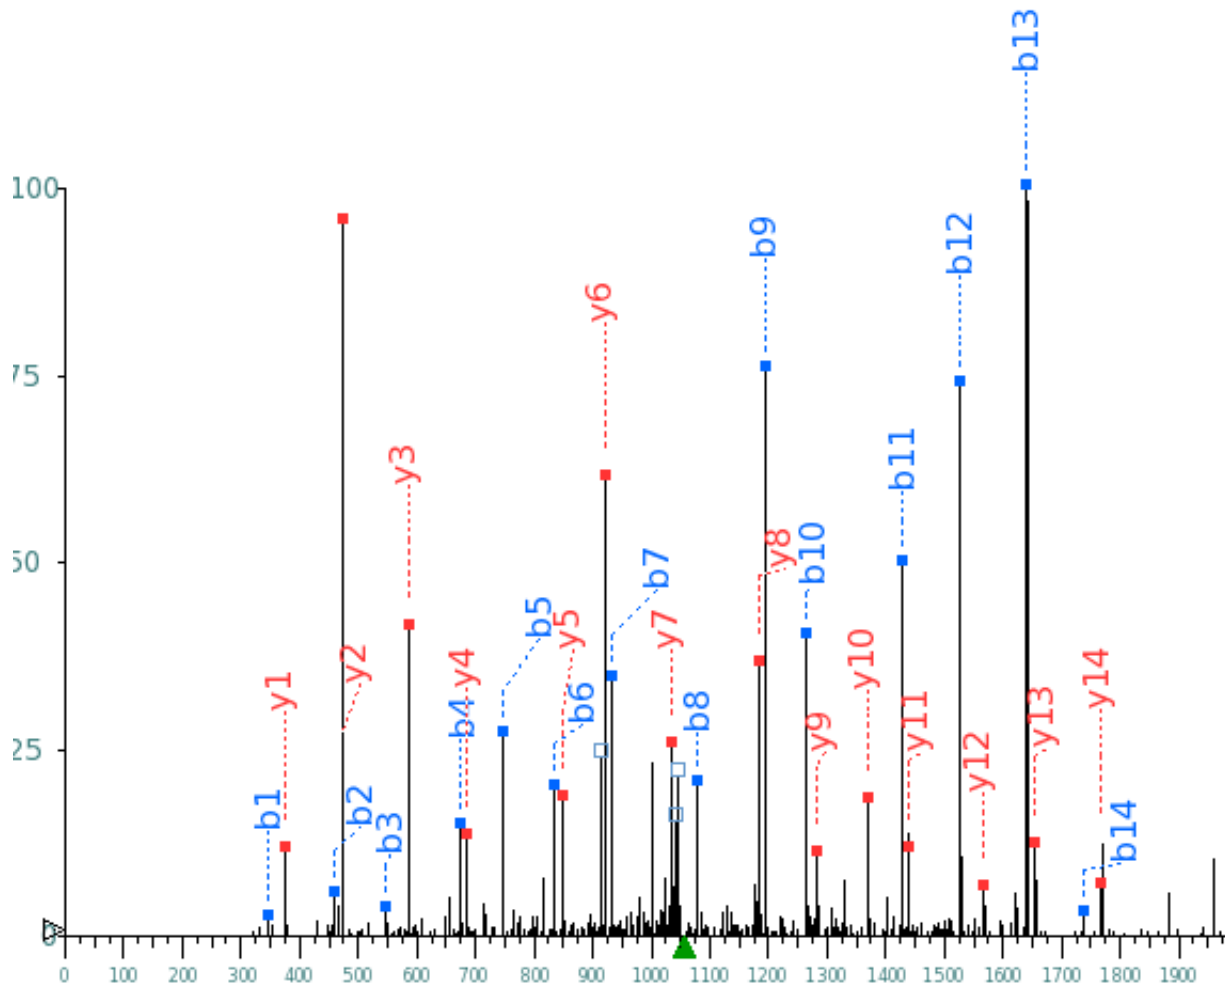

# DISEASVFDAYVLPK (+2)

Primary Reference: RS26\_HUMAN

Search ID: 75318

Search Name: 20141216\_QLhumanTMT6lowres\_Obj15720\_CETSA\_1203\_Set2\_Fraction\_15

Scan#: 35949

Observed Mass: 1056.5848 (-0.2 ppm)

PSM Score: 76.87



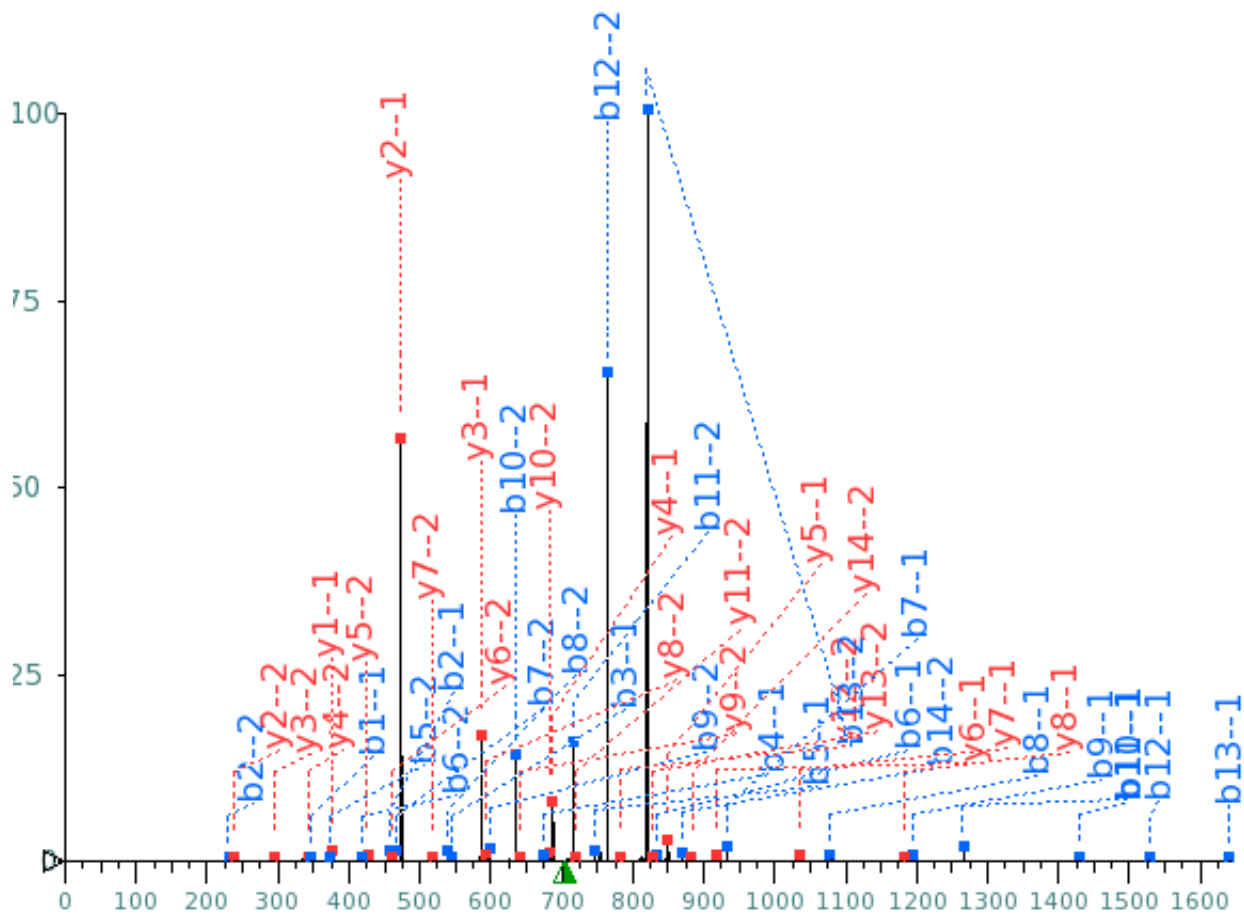

# DISEASVFDAYVLPK (+3)

Primary Reference: RS26\_HUMAN

Search ID: 75318

Search Name: 20141216\_QLhumanTMT6lowres\_Obj15720\_CETSA\_1203\_Set2\_Fraction\_15

Scan#: 35962

Observed Mass: 704.728 (3.1 ppm)

PSM Score: 41.27

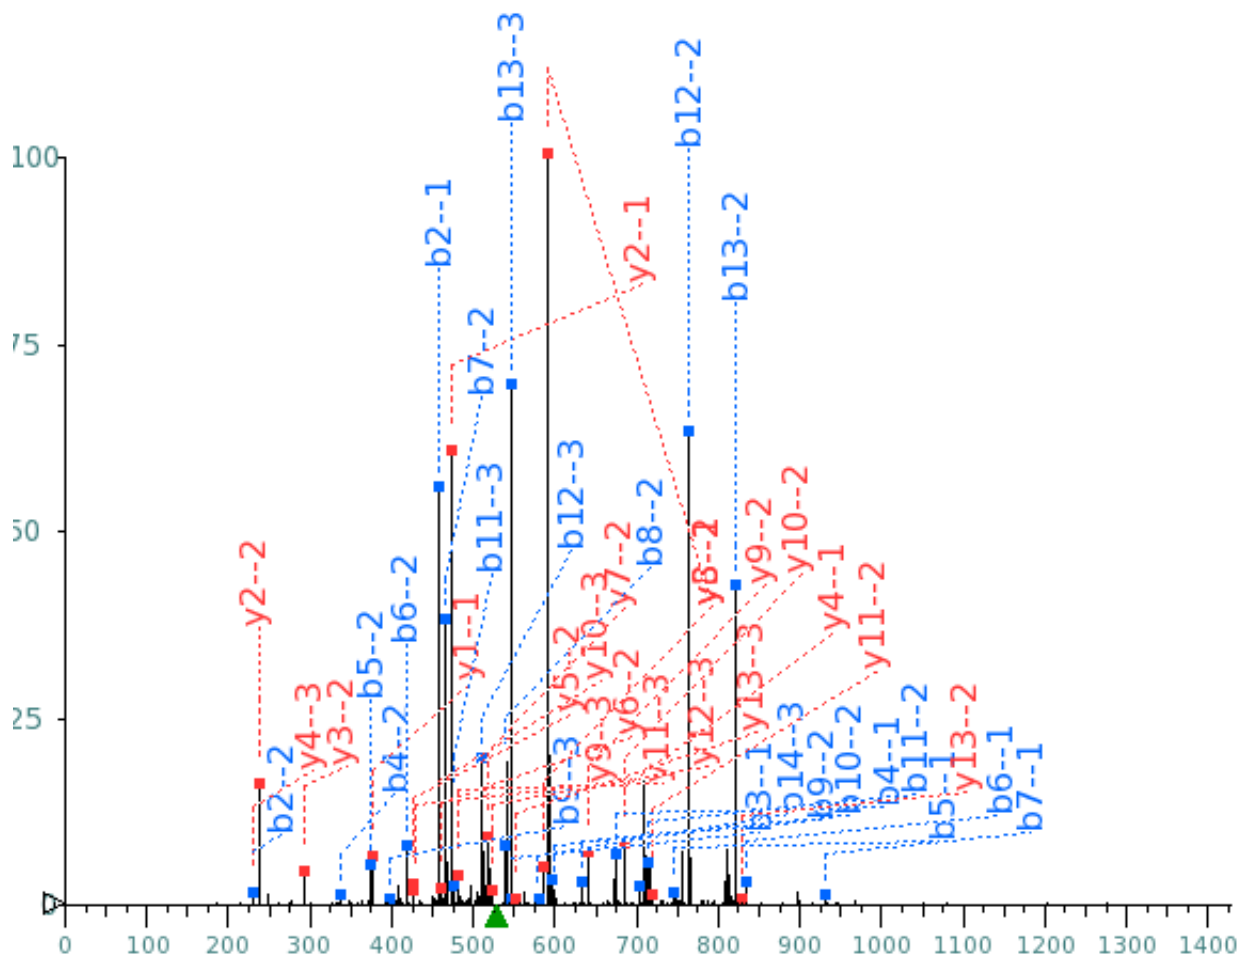

# DISEASVFDAYVLPK (+4)

Primary Reference: RS26\_HUMAN

Search ID: 75318

Search Name: 20141216\_QLhumanTMT6lowres\_Obj15720\_CETSA\_1203\_Set2\_Fraction\_15

Scan#: 36048

Observed Mass: 528.7966 (0.8 ppm)

PSM Score: 32.31

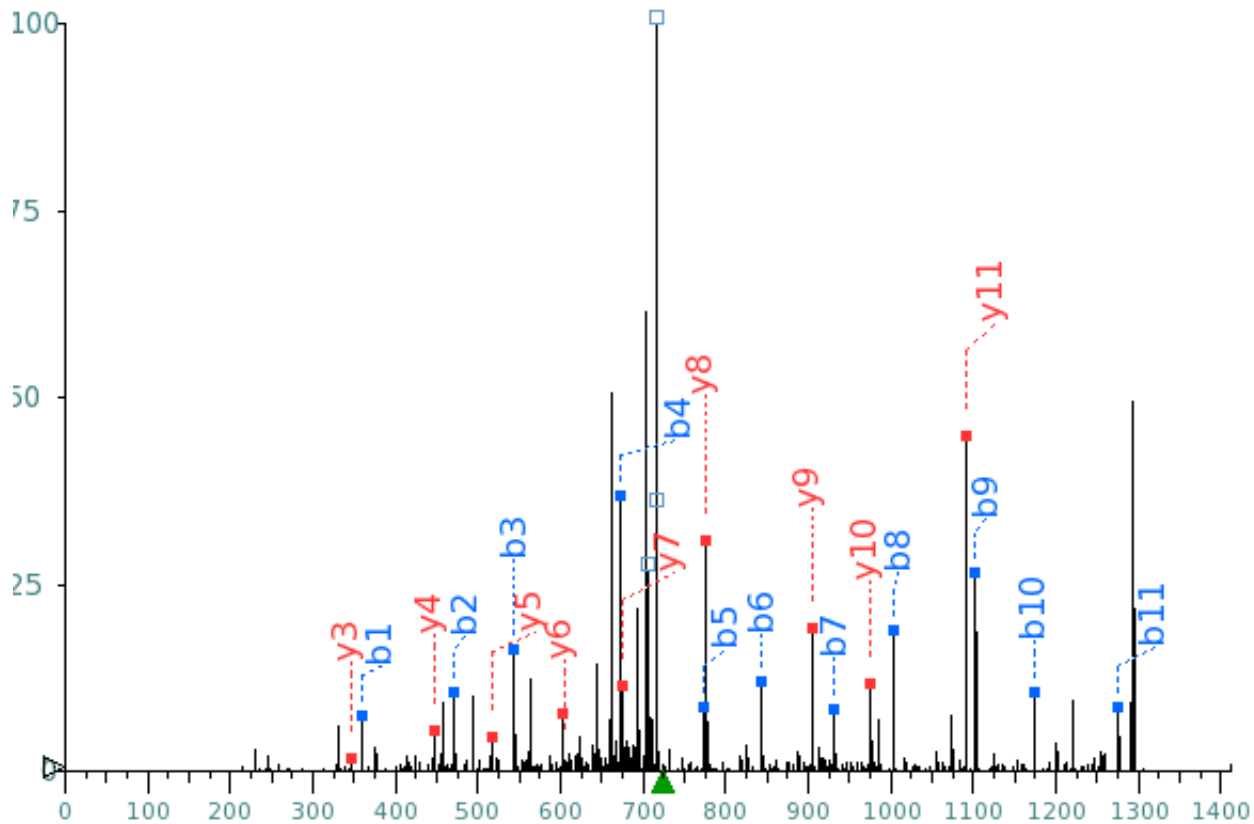

# QNAETASAVATR (+2)

Primary Reference: NCOA7\_HUMAN

Search ID: 75319

Search Name: 20141216\_QLhumanTMT6lowres\_Obj15720\_CETSA\_1203\_Set2\_Fraction\_16

Scan#: 8668

Observed Mass: 724.3886 (-0.1 ppm)

PSM Score: 59.5

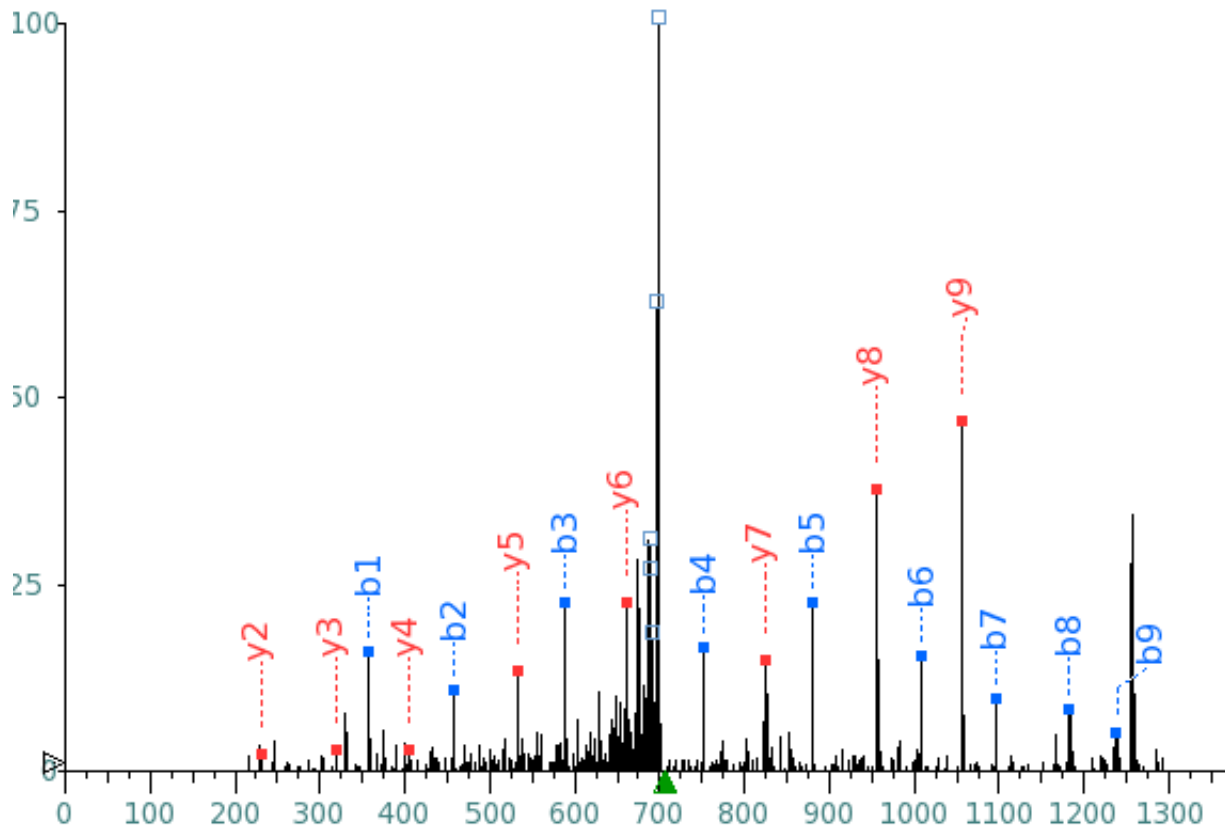

# QVMYQQSSGR (+2)

Primary Reference: EPDR1\_HUMAN

Search ID: 75319

Search Name: 20141216\_QLhumanTMT6lowres\_Obj15720\_CETSA\_1203\_Set2\_Fraction\_16

Scan#: 9671

Observed Mass: 706.8622 (1.2 ppm)

PSM Score: 38.91

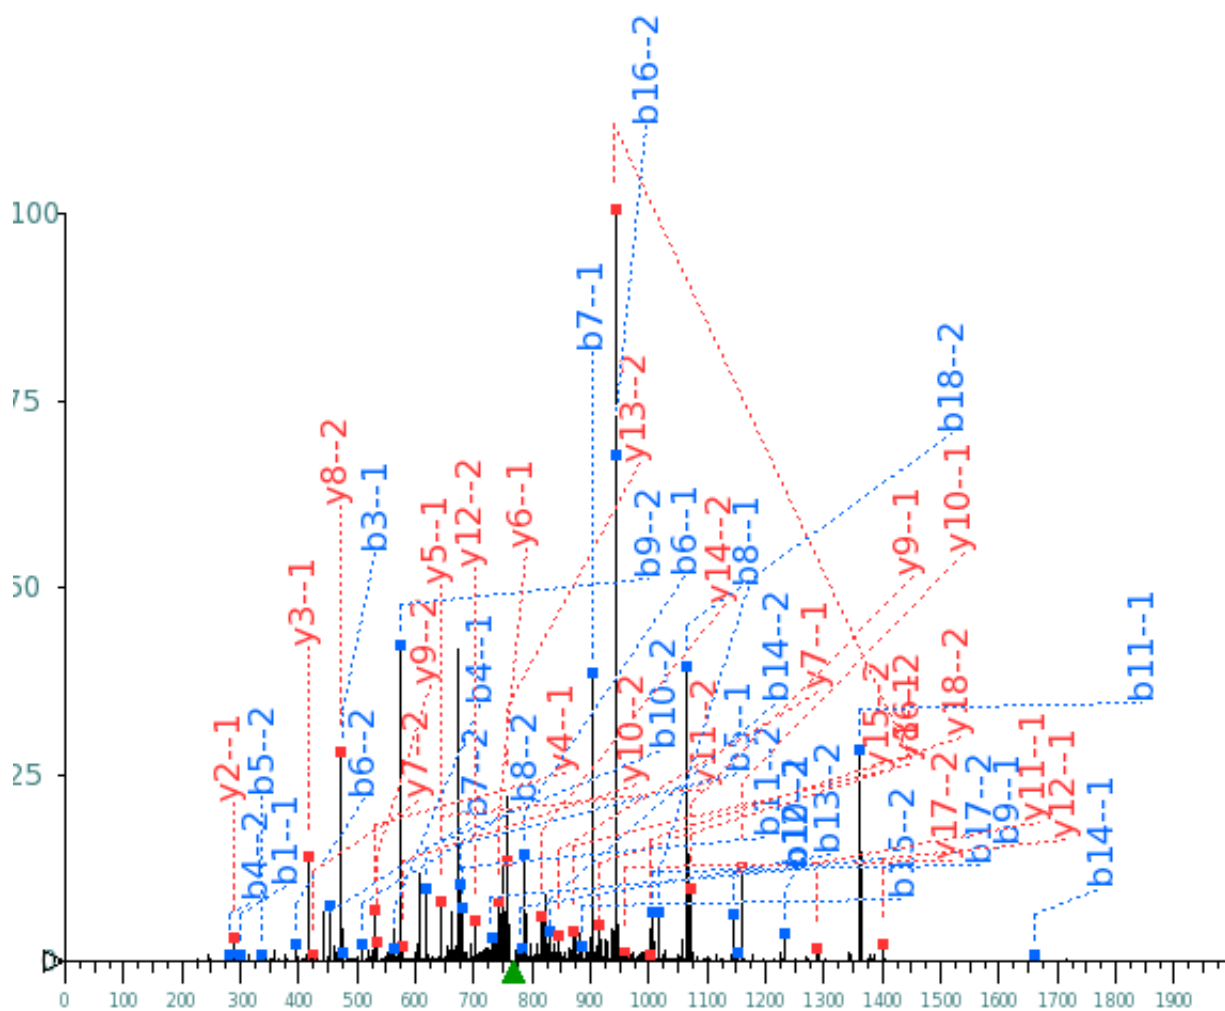

# ASSILINESEPTTIQIR (+3)

Primary Reference: Q53FE8\_HUMAN

Search ID: 75319

Search Name: 20141216\_QLhumanTMT6lowres\_Obj15720\_CETSA\_1203\_Set2\_Fraction\_16

Scan#: 25896

Observed Mass: 768.0864 (-0.2 ppm)

PSM Score: 50.63

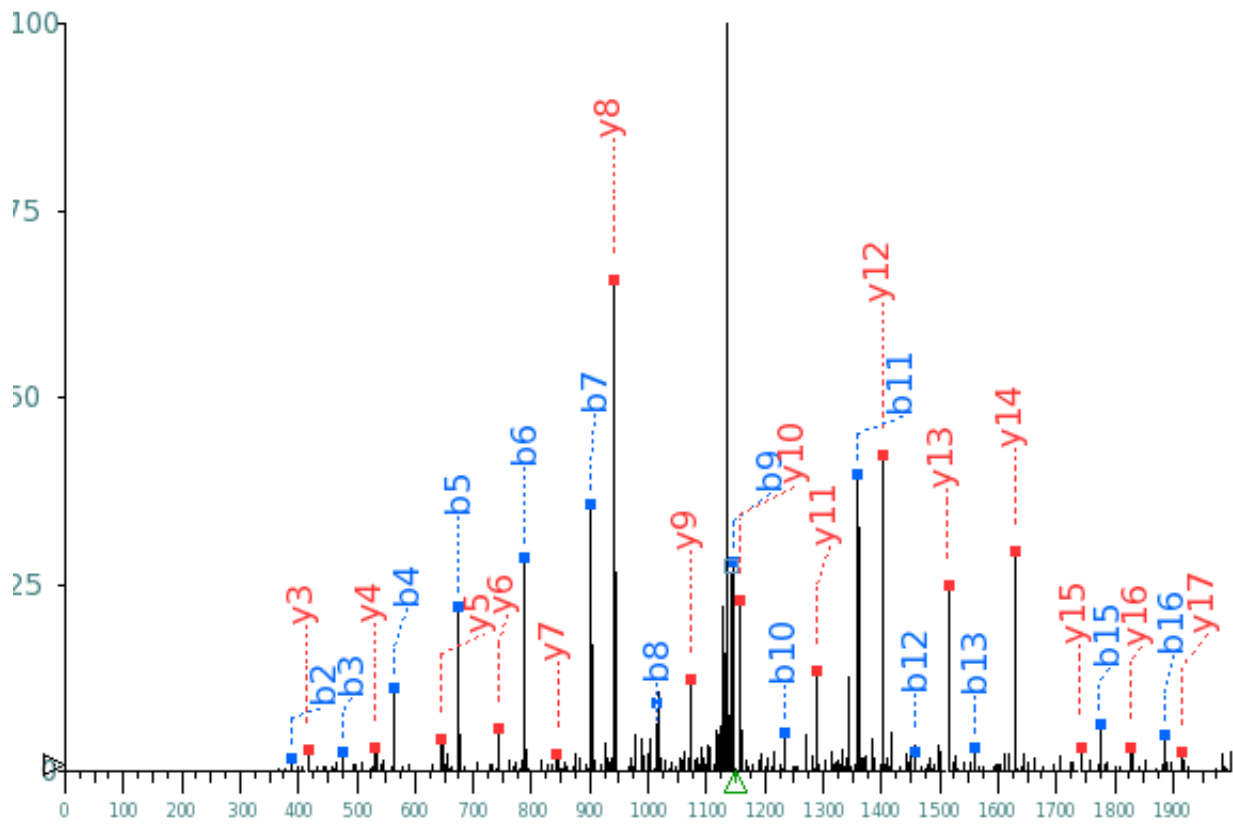

# ASSILINESEPTTNIQIR (+2)

Primary Reference: Q53FE8\_HUMAN

Search ID: 75319

Search Name: 20141216\_QLhumanTMT6lowres\_Obj15720\_CETSA\_1203\_Set2\_Fraction\_16

Scan#: 25905

Observed Mass: 1151.6255 (-0.6 ppm)

PSM Score: 60.05

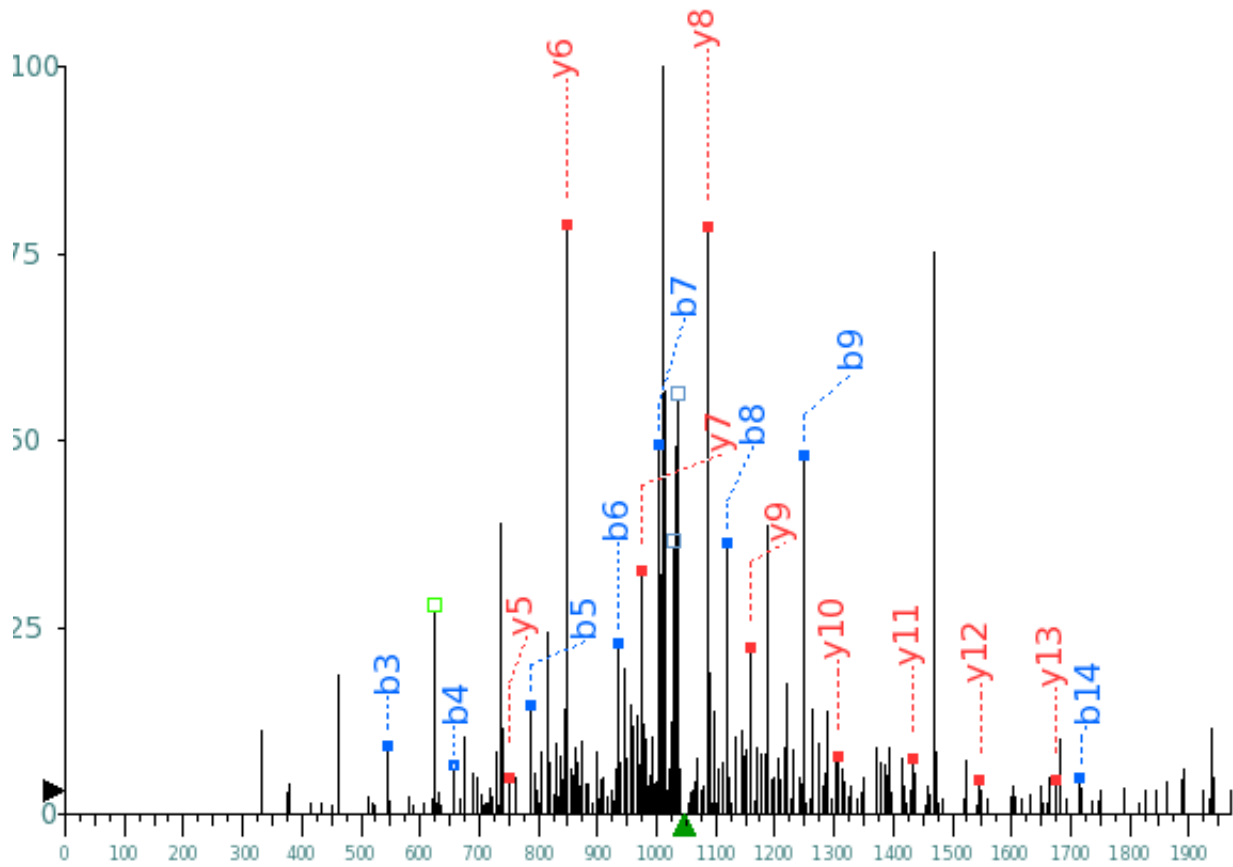

# DAELEFAIQPNTTGK (+2)

Primary Reference: E9PNV3\_HUMAN

Search ID: 75319

Search Name: 20141216\_QLhumanTMT6lowres\_Obj15720\_CETSA\_1203\_Set2\_Fraction\_16

Scan#: 26982

Observed Mass: 1046.5699 (-0 ppm)

PSM Score: 12.3

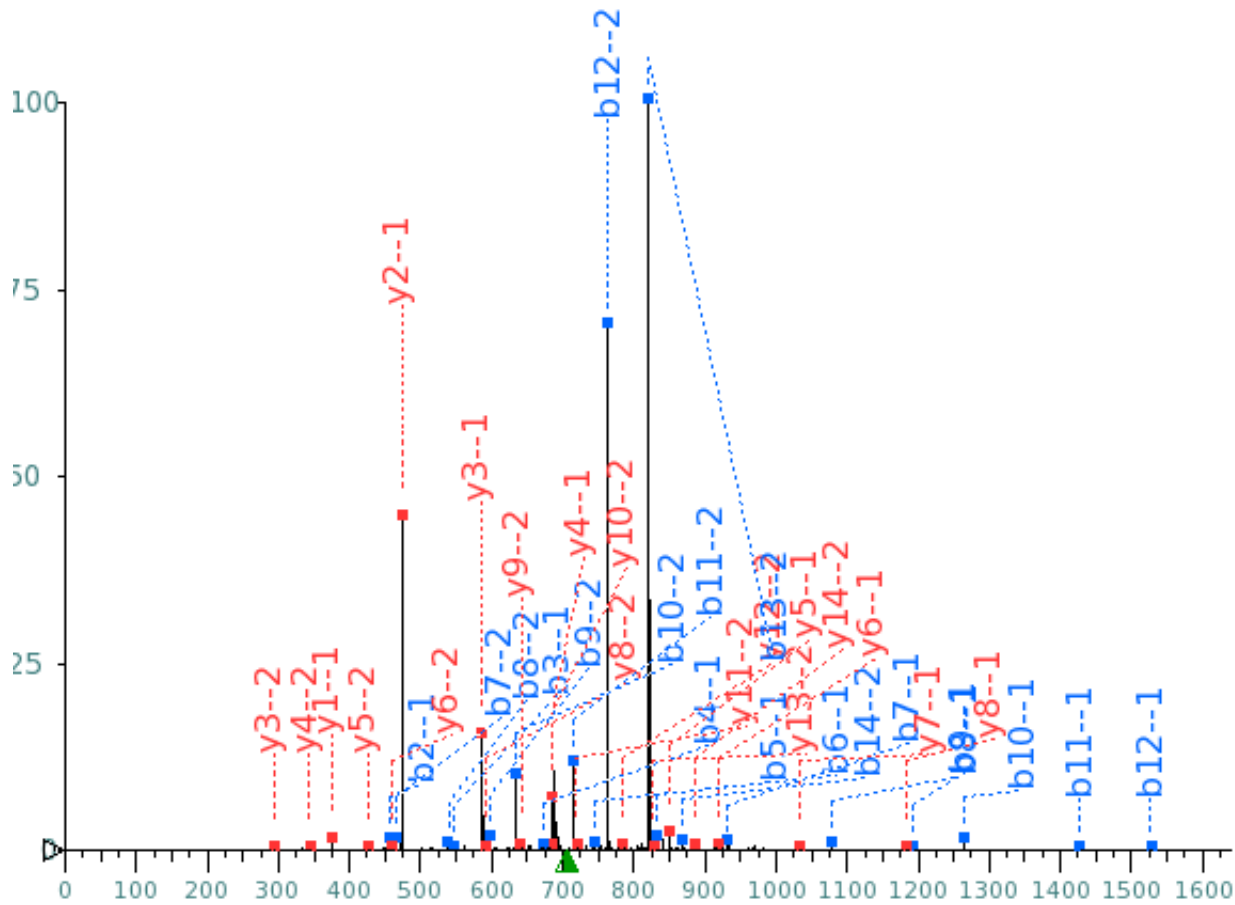

# DISEASVFDAYVLPK (+3)

Primary Reference: RS26\_HUMAN

Search ID: 75319

Search Name: 20141216\_QLhumanTMT6lowres\_Obj15720\_CETSA\_1203\_Set2\_Fraction\_16

Scan#: 35956

Observed Mass: 704.7264 (0.9 ppm)

PSM Score: 32.32



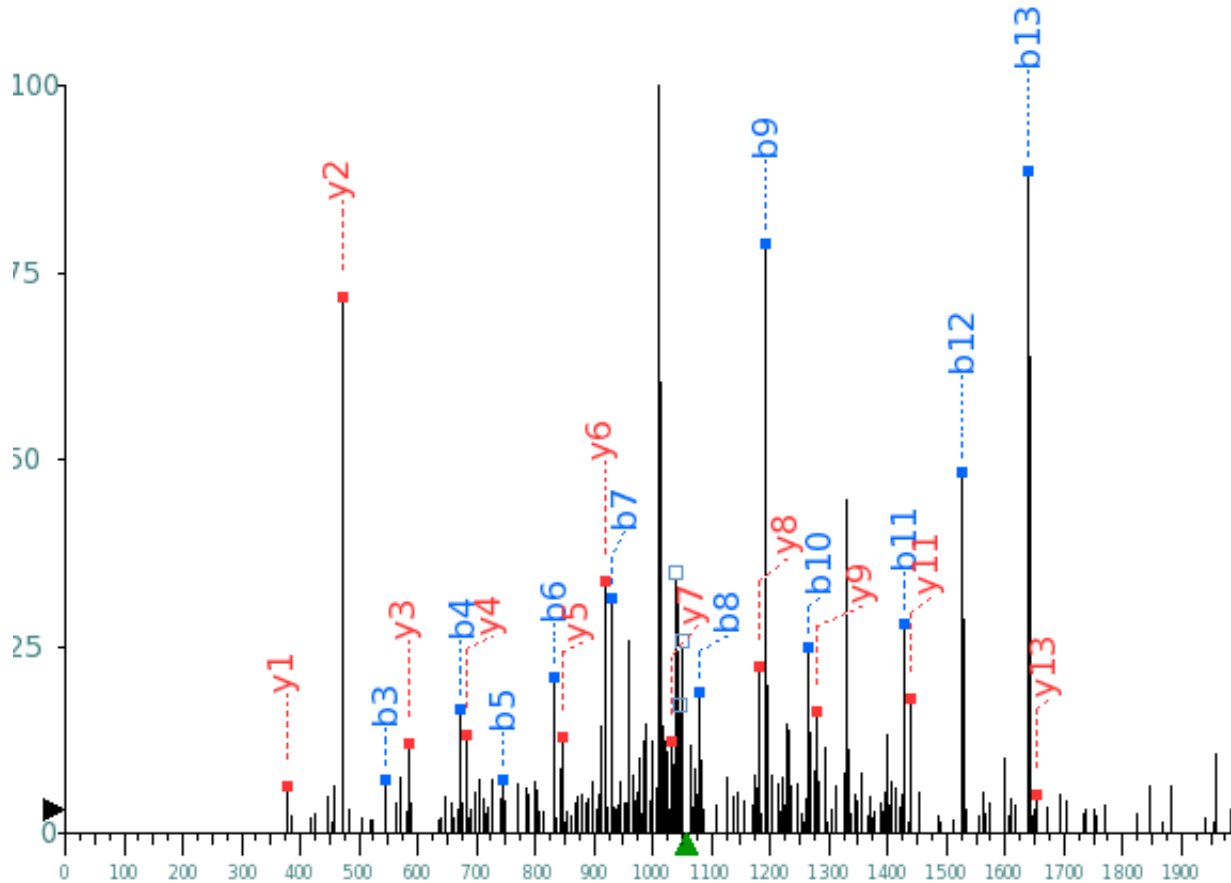

# DISEASVFDAYVLPK (+2)

Primary Reference: RS26\_HUMAN

Search ID: 75319

Search Name: 20141216\_QLhumanTMT6lowres\_Obj15720\_CETSA\_1203\_Set2\_Fraction\_16

Scan#: 35979

Observed Mass: 1056.5863 (1.1 ppm)

PSM Score: 50.84
